# Supplementary material for: CD96, a new immune checkpoint, correlates with immune profile and clinical outcome of glioma
Source: PubMed Central journal article supplement (PMC7330044; doi:10.1038/s41598-020-66806-z), 2020-07-01
Supplement: 41598_2020_66806_MOESM4_ESM.pdf [file 41598_2020_66806_MOESM4_ESM.pdf]

# **CD96, a new immune checkpoint, correlates with immune profile and clinical outcome of glioma**

**Fangkun Liu<sup>1,2†</sup>, Jing Huang<sup>3,4</sup>, Fengqiong He<sup>1,2</sup>, Xiaodong Ma<sup>5</sup>, Fan Fan<sup>1,2</sup>, Ming Meng<sup>1,2</sup>, Yang Zhuo<sup>1,2</sup>, and Liyang Zhang<sup>1,2\*</sup>**

<sup>1</sup> Department of Neurosurgery, Xiangya Hospital, Central South University, Central South University; 87 Xiangya Road; Changsha, Hunan, 410008. China;

<sup>2</sup> Clinical Diagnosis and Therapy Center for Glioma of Xiangya Hospital, Central South University; 87 Xiangya Road; Changsha, Hunan, 410008. China;

<sup>3</sup> Department of Psychiatry, The Second Xiangya Hospital, Central South University, Changsha, Hunan 410011, China;

<sup>4</sup> Mental Health Institute of the Second Xiangya Hospital, Central South University, Chinese National Clinical Research Center on Mental Disorders (xiangya), Chinese National Technology Institute on Mental Disorders, Hunan Key Laboratory of Psychiatry and Mental Health, Changsha, Hunan 410011, China;

<sup>5</sup> Director and Training and Exchange Cooperation Center, Orient Science & Technology College, Hunan Agricultural University, Changsha, Hunan 410000, China.

†The first author;

\*Corresponding Author:

Dr. Liyang Zhang MD, Ph. D

Department of Neurosurgery, Xiangya Hospital, Central South University

87 Xiangya Rd, Changsha, Hunan, 410008, China,

Email: [zhangliyang@csu.edu.cn](mailto:zhangliyang@csu.edu.cn)

| gene         | cor         | t. value    | p. value | FDR      | significant |
|--------------|-------------|-------------|----------|----------|-------------|
| CD2          | 0.777018014 | 22.18459697 | 6.71E-67 | 1.44E-62 | yes         |
| ICOS         | 0.731387712 | 19.27475281 | 1.22E-55 | 1.31E-51 | yes         |
| CCL5         | 0.730427927 | 19.22048863 | 1.99E-55 | 1.42E-51 | yes         |
| CD3G         | 0.729309148 | 19.15754316 | 3.50E-55 | 1.88E-51 | yes         |
| TRAT1        | 0.710687967 | 18.15564051 | 2.90E-51 | 1.24E-47 | yes         |
| CD3D         | 0.709311417 | 18.08479656 | 5.48E-51 | 1.96E-47 | yes         |
| CD5          | 0.704516793 | 17.84126183 | 4.93E-50 | 1.51E-46 | yes         |
| GZMK         | 0.702751583 | 17.75283319 | 1.09E-49 | 2.94E-46 | yes         |
| CD3E         | 0.697066928 | 17.47241395 | 1.37E-48 | 3.27E-45 | yes         |
| CXCR6        | 0.666781761 | 16.07982138 | 3.76E-43 | 8.09E-40 | yes         |
| ANO9         | 0.663241203 | 15.92706187 | 1.48E-42 | 2.89E-39 | yes         |
| CD27         | 0.653857694 | 15.53131006 | 5.09E-41 | 9.12E-38 | yes         |
| TBC1D10C     | 0.65286613  | 15.49023705 | 7.35E-41 | 1.21E-37 | yes         |
| SIT1         | 0.647185684 | 15.25758452 | 5.84E-40 | 8.97E-37 | yes         |
| CD6          | 0.643993041 | 15.12875552 | 1.84E-39 | 2.64E-36 | yes         |
| IL2RG        | 0.6408432   | 15.00297737 | 5.62E-39 | 7.55E-36 | yes         |
| CD52         | 0.632402678 | 14.67219678 | 1.06E-37 | 1.33E-34 | yes         |
| CST7         | 0.62811363  | 14.50748039 | 4.52E-37 | 5.40E-34 | yes         |
| CXCL9        | 0.626226466 | 14.4357015  | 8.52E-37 | 9.63E-34 | yes         |
| P2RY10       | 0.616079382 | 14.05678082 | 2.38E-35 | 2.56E-32 | yes         |
| NRG1         | 0.614286621 | 13.99102854 | 4.24E-35 | 4.34E-32 | yes         |
| DENND2D      | 0.61031419  | 13.84656737 | 1.50E-34 | 1.46E-31 | yes         |
| IL2RB        | 0.607664507 | 13.75113736 | 3.45E-34 | 3.22E-31 | yes         |
| KLRB1        | 0.599581556 | 13.46447099 | 4.17E-33 | 3.73E-30 | yes         |
| CCR7         | 0.599229281 | 13.45212608 | 4.64E-33 | 3.99E-30 | yes         |
| GZMH         | 0.590323023 | 13.14399938 | 6.65E-32 | 5.49E-29 | yes         |
| TRAF3IP3     | 0.589205547 | 13.1058673  | 9.23E-32 | 7.35E-29 | yes         |
| ARHGAP15     | 0.587470331 | 13.04688387 | 1.53E-31 | 1.18E-28 | yes         |
| PTPLAD2      | 0.586529496 | 13.0150181  | 2.02E-31 | 1.49E-28 | yes         |
| LTB          | 0.584994926 | 12.96321486 | 3.14E-31 | 2.25E-28 | yes         |
| TNFSF8       | 0.584892121 | 12.95975201 | 3.24E-31 | 2.25E-28 | yes         |
| EMB          | 0.578379874 | 12.74230511 | 2.08E-30 | 1.40E-27 | yes         |
| CD80         | 0.574626047 | 12.61863583 | 5.96E-30 | 3.88E-27 | yes         |
| B2M          | 0.573940004 | 12.59616357 | 7.22E-30 | 4.56E-27 | yes         |
| SH2D1A       | 0.57185523  | 12.52811596 | 1.29E-29 | 7.90E-27 | yes         |
| PDCD1        | 0.569694147 | 12.45795829 | 2.33E-29 | 1.39E-26 | yes         |
| HLA-DRA      | 0.568682817 | 12.42525807 | 3.08E-29 | 1.79E-26 | yes         |
| GZMA         | 0.567812399 | 12.39718076 | 3.90E-29 | 2.21E-26 | yes         |
| DAPP1        | 0.566629748 | 12.35912997 | 5.38E-29 | 2.96E-26 | yes         |
| GPR171       | 0.565617598 | 12.32665427 | 7.08E-29 | 3.80E-26 | yes         |
| IL9R         | 0.565221442 | 12.31396563 | 7.88E-29 | 4.13E-26 | yes         |
| CD48         | 0.562926654 | 12.24071013 | 1.46E-28 | 7.47E-26 | yes         |
| LOC100506776 | 0.561633224 | 12.19960352 | 2.06E-28 | 1.03E-25 | yes         |
| P2RY8        | 0.558091855 | 12.08772062 | 5.28E-28 | 2.58E-25 | yes         |
| CTSS         | 0.557583707 | 12.07174581 | 6.03E-28 | 2.88E-25 | yes         |
| LCP1         | 0.55720493  | 12.05985089 | 6.66E-28 | 3.11E-25 | yes         |
| RASSF5       | 0.555066517 | 11.99290134 | 1.17E-27 | 5.33E-25 | yes         |
| LCK          | 0.554138126 | 11.96394251 | 1.49E-27 | 6.65E-25 | yes         |
| HLA-DOA      | 0.552649812 | 11.91765252 | 2.19E-27 | 9.58E-25 | yes         |
| GBP4         | 0.551105601 | 11.86979749 | 3.26E-27 | 1.40E-24 | yes         |

|              |             |             |          |          |     |
|--------------|-------------|-------------|----------|----------|-----|
| LY9          | 0.549212326 | 11.81136387 | 5.29E-27 | 2.23E-24 | yes |
| CCR2         | 0.549095124 | 11.80775514 | 5.45E-27 | 2.25E-24 | yes |
| LINC00426    | 0.547777239 | 11.76724532 | 7.63E-27 | 3.09E-24 | yes |
| ZAP70        | 0.545184618 | 11.68791636 | 1.47E-26 | 5.86E-24 | yes |
| GBP5         | 0.541068185 | 11.56293938 | 4.13E-26 | 1.61E-23 | yes |
| HSH2D        | 0.540995452 | 11.56074183 | 4.21E-26 | 1.61E-23 | yes |
| PTGER4       | 0.540748712 | 11.55328953 | 4.47E-26 | 1.69E-23 | yes |
| SLA2         | 0.540443306 | 11.54407115 | 4.83E-26 | 1.79E-23 | yes |
| RAC2         | 0.54007328  | 11.53291095 | 5.29E-26 | 1.93E-23 | yes |
| FPR3         | 0.539377495 | 11.51195121 | 6.29E-26 | 2.25E-23 | yes |
| APOBEC3G     | 0.538937899 | 11.49872603 | 7.01E-26 | 2.47E-23 | yes |
| SASH3        | 0.537504593 | 11.455697   | 9.98E-26 | 3.46E-23 | yes |
| LOC100130231 | 0.534691467 | 11.37164955 | 1.99E-25 | 6.78E-23 | yes |
| CSTA         | 0.534275632 | 11.35927079 | 2.20E-25 | 7.38E-23 | yes |
| GVINP1       | 0.532953587 | 11.31999219 | 3.03E-25 | 1.00E-22 | yes |
| SP100        | 0.530313819 | 11.24190898 | 5.73E-25 | 1.87E-22 | yes |
| FASLG        | 0.529529977 | 11.21881115 | 6.91E-25 | 2.22E-22 | yes |
| ACAP1        | 0.527004831 | 11.14467222 | 1.26E-24 | 3.99E-22 | yes |
| NFAM1        | 0.525876781 | 11.11168479 | 1.65E-24 | 5.14E-22 | yes |
| TLR1         | 0.525354745 | 11.09644642 | 1.87E-24 | 5.73E-22 | yes |
| ELK2AP       | 0.522592508 | 11.01610283 | 3.57E-24 | 1.08E-21 | yes |
| GRAP2        | 0.52234695  | 11.00898363 | 3.79E-24 | 1.13E-21 | yes |
| STX11        | 0.52184395  | 10.99441246 | 4.26E-24 | 1.25E-21 | yes |
| GPR65        | 0.519331286 | 10.92185935 | 7.64E-24 | 2.22E-21 | yes |
| DOCK2        | 0.518872712 | 10.90866005 | 8.49E-24 | 2.43E-21 | yes |
| PDCD1LG2     | 0.517386081 | 10.86595826 | 1.20E-23 | 3.38E-21 | yes |
| MLKL         | 0.516546291 | 10.84189569 | 1.45E-23 | 4.05E-21 | yes |
| LYZ          | 0.515736228 | 10.81872532 | 1.75E-23 | 4.81E-21 | yes |
| HLA-DMB      | 0.515092761 | 10.80034832 | 2.02E-23 | 5.51E-21 | yes |
| PLSCR1       | 0.514176263 | 10.77421661 | 2.49E-23 | 6.70E-21 | yes |
| CTBS         | 0.513976524 | 10.76852821 | 2.61E-23 | 6.93E-21 | yes |
| IL12RB1      | 0.512151505 | 10.71666306 | 3.95E-23 | 1.04E-20 | yes |
| GAPT         | 0.512038171 | 10.71344874 | 4.05E-23 | 1.05E-20 | yes |
| ITGAL        | 0.511982442 | 10.71186846 | 4.10E-23 | 1.05E-20 | yes |
| CD247        | 0.511369975 | 10.69451308 | 4.71E-23 | 1.18E-20 | yes |
| HLA-DMA      | 0.511349838 | 10.69394285 | 4.73E-23 | 1.18E-20 | yes |
| LAPTM5       | 0.509608968 | 10.6447344  | 7.00E-23 | 1.73E-20 | yes |
| SIRPG        | 0.508544505 | 10.6147328  | 8.89E-23 | 2.17E-20 | yes |
| LAP3         | 0.508166751 | 10.60410169 | 9.67E-23 | 2.33E-20 | yes |
| HLA-E        | 0.508066902 | 10.60129303 | 9.89E-23 | 2.36E-20 | yes |
| RNASE6       | 0.507577447 | 10.58753343 | 1.10E-22 | 2.60E-20 | yes |
| CD72         | 0.507323181 | 10.58039094 | 1.17E-22 | 2.73E-20 | yes |
| RIPK3        | 0.505051416 | 10.51674013 | 1.93E-22 | 4.46E-20 | yes |
| CMAHP        | 0.503136685 | 10.46332084 | 2.94E-22 | 6.73E-20 | yes |
| CD7          | 0.502118045 | 10.43498589 | 3.68E-22 | 8.33E-20 | yes |
| NMI          | 0.501847235 | 10.42746268 | 3.91E-22 | 8.69E-20 | yes |
| TFEC         | 0.501825943 | 10.42687136 | 3.92E-22 | 8.69E-20 | yes |
| ARHGDI1B     | 0.500808123 | 10.39863383 | 4.90E-22 | 1.07E-19 | yes |
| CYP1B1       | 0.500536669 | 10.39111257 | 5.20E-22 | 1.13E-19 | yes |
| ADAP2        | 0.500418616 | 10.38784289 | 5.33E-22 | 1.15E-19 | yes |
| CD86         | 0.500271524 | 10.38377004 | 5.51E-22 | 1.17E-19 | yes |

|          |             |             |          |          |     |
|----------|-------------|-------------|----------|----------|-----|
| ITGB7    | 0.499838367 | 10.37178329 | 6.05E-22 | 1.27E-19 | yes |
| ARHGAP30 | 0.499787444 | 10.37037477 | 6.12E-22 | 1.28E-19 | yes |
| CREG1    | 0.499738245 | 10.36901407 | 6.18E-22 | 1.28E-19 | yes |
| FGL2     | 0.499568253 | 10.36431364 | 6.42E-22 | 1.31E-19 | yes |
| SCPEP1   | 0.498454477 | 10.33355622 | 8.17E-22 | 1.66E-19 | yes |
| SLAMF1   | 0.498128461 | 10.32456603 | 8.76E-22 | 1.76E-19 | yes |
| 37135    | 0.497781842 | 10.3150141  | 9.44E-22 | 1.88E-19 | yes |
| HLA-DPB1 | 0.497729283 | 10.31356628 | 9.55E-22 | 1.88E-19 | yes |
| 38961    | 0.497459738 | 10.3061436  | 1.01E-21 | 1.98E-19 | yes |
| ABHD15   | 0.49666003  | 10.28414478 | 1.20E-21 | 2.33E-19 | yes |
| PIK3AP1  | 0.496604463 | 10.2826175  | 1.22E-21 | 2.33E-19 | yes |
| CD69     | 0.493686888 | 10.20266159 | 2.27E-21 | 4.32E-19 | yes |
| PLEK     | 0.493104279 | 10.18675003 | 2.57E-21 | 4.84E-19 | yes |
| RASAL3   | 0.493051057 | 10.18529741 | 2.60E-21 | 4.86E-19 | yes |
| TPRG1    | 0.492663586 | 10.17472638 | 2.82E-21 | 5.23E-19 | yes |
| CYBB     | 0.491883354 | 10.15346418 | 3.33E-21 | 6.11E-19 | yes |
| IGJ      | 0.490963362 | 10.12843484 | 4.04E-21 | 7.36E-19 | yes |
| CCDC69   | 0.49072682  | 10.1220067  | 4.25E-21 | 7.68E-19 | yes |
| FYB      | 0.489191291 | 10.08034945 | 5.87E-21 | 1.05E-18 | yes |
| MAP3K8   | 0.488920683 | 10.07302094 | 6.21E-21 | 1.10E-18 | yes |
| IFITM3   | 0.48888884  | 10.07215884 | 6.25E-21 | 1.10E-18 | yes |
| RUNX3    | 0.4887614   | 10.06870908 | 6.42E-21 | 1.12E-18 | yes |
| SNX20    | 0.488226521 | 10.05423936 | 7.18E-21 | 1.24E-18 | yes |
| ADPRH    | 0.487871907 | 10.04465443 | 7.74E-21 | 1.32E-18 | yes |
| THEMIS2  | 0.487870545 | 10.04461765 | 7.74E-21 | 1.32E-18 | yes |
| GIMAP2   | 0.487701956 | 10.0400631  | 8.02E-21 | 1.34E-18 | yes |
| CSF2RB   | 0.487686436 | 10.03964389 | 8.04E-21 | 1.34E-18 | yes |
| IL7R     | 0.487684434 | 10.03958984 | 8.04E-21 | 1.34E-18 | yes |
| CD40LG   | 0.487353106 | 10.03064342 | 8.62E-21 | 1.43E-18 | yes |
| TXK      | 0.48626977  | 10.00143114 | 1.08E-20 | 1.76E-18 | yes |
| SCIMP    | 0.486267054 | 10.00135799 | 1.08E-20 | 1.76E-18 | yes |
| TMC8     | 0.486058923 | 9.995752666 | 1.13E-20 | 1.82E-18 | yes |
| BTK      | 0.485796629 | 9.98869181  | 1.19E-20 | 1.91E-18 | yes |
| CD1D     | 0.485425801 | 9.978715293 | 1.29E-20 | 2.05E-18 | yes |
| MOB1A    | 0.485178842 | 9.972075202 | 1.35E-20 | 2.13E-18 | yes |
| FAM26F   | 0.485158599 | 9.971531042 | 1.36E-20 | 2.13E-18 | yes |
| C1orf162 | 0.484855052 | 9.963374002 | 1.45E-20 | 2.25E-18 | yes |
| TMEM106A | 0.48482795  | 9.962645947 | 1.46E-20 | 2.25E-18 | yes |
| GIMAP4   | 0.484251943 | 9.947180972 | 1.64E-20 | 2.52E-18 | yes |
| CYTIP    | 0.484120961 | 9.943666678 | 1.68E-20 | 2.55E-18 | yes |
| SH2B3    | 0.484116203 | 9.943539021 | 1.69E-20 | 2.55E-18 | yes |
| EVI2B    | 0.483542742 | 9.928163159 | 1.90E-20 | 2.85E-18 | yes |
| PTPRC    | 0.483273901 | 9.920960638 | 2.01E-20 | 2.99E-18 | yes |
| MSR1     | 0.483158516 | 9.917870483 | 2.05E-20 | 3.04E-18 | yes |
| STAT5A   | 0.48196353  | 9.885906814 | 2.63E-20 | 3.86E-18 | yes |
| C1S      | 0.48021819  | 9.839351159 | 3.75E-20 | 5.48E-18 | yes |
| MCOLN2   | 0.480051543 | 9.834913956 | 3.88E-20 | 5.60E-18 | yes |
| TLR2     | 0.480046131 | 9.834769868 | 3.88E-20 | 5.60E-18 | yes |
| NCF4     | 0.47994016  | 9.831948974 | 3.97E-20 | 5.68E-18 | yes |
| CD226    | 0.479913043 | 9.831227237 | 3.99E-20 | 5.68E-18 | yes |
| TMEM109  | 0.479692488 | 9.825358279 | 4.17E-20 | 5.90E-18 | yes |

|              |             |             |          |          |     |
|--------------|-------------|-------------|----------|----------|-----|
| BIN2         | 0.479317619 | 9.815388589 | 4.50E-20 | 6.31E-18 | yes |
| TYMP         | 0.479297114 | 9.814843473 | 4.52E-20 | 6.31E-18 | yes |
| RCS1D1       | 0.478617031 | 9.796775072 | 5.19E-20 | 7.20E-18 | yes |
| LPXN         | 0.478496251 | 9.793568603 | 5.32E-20 | 7.33E-18 | yes |
| SLC15A3      | 0.478195958 | 9.785599506 | 5.65E-20 | 7.74E-18 | yes |
| PTGER2       | 0.477776816 | 9.774483865 | 6.15E-20 | 8.37E-18 | yes |
| AIM1         | 0.477728726 | 9.773209091 | 6.21E-20 | 8.40E-18 | yes |
| BATF         | 0.476437983 | 9.739035922 | 8.06E-20 | 1.08E-17 | yes |
| DTX3L        | 0.47613365  | 9.730990433 | 8.57E-20 | 1.14E-17 | yes |
| CD4          | 0.475843259 | 9.723317714 | 9.08E-20 | 1.20E-17 | yes |
| NAGA         | 0.475131635 | 9.704532559 | 1.05E-19 | 1.38E-17 | yes |
| GPRIN3       | 0.474867013 | 9.697553453 | 1.10E-19 | 1.45E-17 | yes |
| ATP2A3       | 0.473794431 | 9.669300052 | 1.37E-19 | 1.78E-17 | yes |
| GPR174       | 0.473591767 | 9.663967839 | 1.42E-19 | 1.84E-17 | yes |
| USP15        | 0.472784766 | 9.642754696 | 1.67E-19 | 2.15E-17 | yes |
| CD300C       | 0.472634113 | 9.638798041 | 1.72E-19 | 2.20E-17 | yes |
| PTPRCAP      | 0.472384984 | 9.632257439 | 1.81E-19 | 2.30E-17 | yes |
| TRIM38       | 0.472358348 | 9.631558328 | 1.82E-19 | 2.30E-17 | yes |
| SAMHD1       | 0.47231564  | 9.630437425 | 1.84E-19 | 2.31E-17 | yes |
| IL13RA1      | 0.472157414 | 9.626285455 | 1.89E-19 | 2.37E-17 | yes |
| S1PR4        | 0.471853064 | 9.618302461 | 2.01E-19 | 2.50E-17 | yes |
| PRKCH        | 0.470349384 | 9.578926213 | 2.71E-19 | 3.33E-17 | yes |
| C16orf54     | 0.470344542 | 9.578799595 | 2.71E-19 | 3.33E-17 | yes |
| LOC100506585 | 0.470237021 | 9.575988124 | 2.77E-19 | 3.38E-17 | yes |
| LY75         | 0.470137134 | 9.573376769 | 2.82E-19 | 3.43E-17 | yes |
| VAMP8        | 0.469630649 | 9.560142879 | 3.12E-19 | 3.77E-17 | yes |
| HLA-B        | 0.469342076 | 9.552608214 | 3.30E-19 | 3.96E-17 | yes |
| FCGR2A       | 0.468989057 | 9.543396218 | 3.54E-19 | 4.23E-17 | yes |
| SERPINB9     | 0.467825137 | 9.513065245 | 4.45E-19 | 5.28E-17 | yes |
| PARP9        | 0.467605187 | 9.507340627 | 4.64E-19 | 5.45E-17 | yes |
| LAMP3        | 0.467601476 | 9.507244076 | 4.64E-19 | 5.45E-17 | yes |
| ARL11        | 0.467424464 | 9.502638676 | 4.81E-19 | 5.62E-17 | yes |
| PIK3CD       | 0.466255289 | 9.472256389 | 6.04E-19 | 7.01E-17 | yes |
| LOC100505812 | 0.466063556 | 9.467280065 | 6.27E-19 | 7.24E-17 | yes |
| TNFRSF1B     | 0.46585634  | 9.461903799 | 6.53E-19 | 7.50E-17 | yes |
| TLR8         | 0.464924677 | 9.437756125 | 7.82E-19 | 8.94E-17 | yes |
| B4GALT1      | 0.464286322 | 9.421233775 | 8.85E-19 | 1.01E-16 | yes |
| TEC          | 0.46269127  | 9.380031213 | 1.20E-18 | 1.36E-16 | yes |
| MS4A6A       | 0.462576405 | 9.377068571 | 1.23E-18 | 1.38E-16 | yes |
| PARP14       | 0.462524646 | 9.375733769 | 1.24E-18 | 1.39E-16 | yes |
| SKAP1        | 0.461785814 | 9.356693575 | 1.43E-18 | 1.59E-16 | yes |
| CD28         | 0.46123311  | 9.342466206 | 1.59E-18 | 1.76E-16 | yes |
| ARPC1B       | 0.461133924 | 9.339914482 | 1.62E-18 | 1.79E-16 | yes |
| FCER1G       | 0.461023338 | 9.337070004 | 1.66E-18 | 1.82E-16 | yes |
| LY96         | 0.460707258 | 9.328942872 | 1.76E-18 | 1.92E-16 | yes |
| XCL1         | 0.460527582 | 9.324325028 | 1.82E-18 | 1.98E-16 | yes |
| CMTM7        | 0.460041887 | 9.31184941  | 2.00E-18 | 2.16E-16 | yes |
| MFSD1        | 0.459810354 | 9.305905979 | 2.09E-18 | 2.24E-16 | yes |
| SRGN         | 0.459671368 | 9.302339362 | 2.14E-18 | 2.29E-16 | yes |
| MYO1G        | 0.459288344 | 9.292514822 | 2.31E-18 | 2.45E-16 | yes |
| PML          | 0.458746569 | 9.278629541 | 2.56E-18 | 2.71E-16 | yes |

|          |             |             |          |          |     |
|----------|-------------|-------------|----------|----------|-----|
| EPHA1    | 0.458444568 | 9.270895176 | 2.71E-18 | 2.85E-16 | yes |
| HLA-DQA1 | 0.458328456 | 9.267922589 | 2.77E-18 | 2.90E-16 | yes |
| GPR18    | 0.458287498 | 9.26687417  | 2.79E-18 | 2.91E-16 | yes |
| CD300LB  | 0.458038392 | 9.260499251 | 2.92E-18 | 3.03E-16 | yes |
| FERMT3   | 0.457975956 | 9.258901876 | 2.96E-18 | 3.06E-16 | yes |
| TRIM21   | 0.457938426 | 9.2579418   | 2.98E-18 | 3.06E-16 | yes |
| CTLA4    | 0.4578467   | 9.255595518 | 3.03E-18 | 3.10E-16 | yes |
| SLAMF8   | 0.457763366 | 9.253464241 | 3.08E-18 | 3.14E-16 | yes |
| CARD11   | 0.457608787 | 9.249511674 | 3.17E-18 | 3.21E-16 | yes |
| MNDA     | 0.457482464 | 9.246282392 | 3.25E-18 | 3.28E-16 | yes |
| MZB1     | 0.457076904 | 9.235919583 | 3.51E-18 | 3.52E-16 | yes |
| GRN      | 0.456850973 | 9.230149765 | 3.66E-18 | 3.66E-16 | yes |
| LAIR1    | 0.456772876 | 9.228155873 | 3.71E-18 | 3.69E-16 | yes |
| FUCA1    | 0.456498414 | 9.221150668 | 3.91E-18 | 3.87E-16 | yes |
| CCR4     | 0.456398264 | 9.218595322 | 3.98E-18 | 3.93E-16 | yes |
| CCR1     | 0.456318799 | 9.216568089 | 4.04E-18 | 3.97E-16 | yes |
| MFSD7    | 0.455692012 | 9.20058779  | 4.55E-18 | 4.44E-16 | yes |
| WDFY4    | 0.455545866 | 9.196864186 | 4.68E-18 | 4.55E-16 | yes |
| NPC2     | 0.45508072  | 9.185019186 | 5.10E-18 | 4.94E-16 | yes |
| LCP2     | 0.454100568 | 9.160090466 | 6.13E-18 | 5.91E-16 | yes |
| TLR6     | 0.454038304 | 9.158508302 | 6.20E-18 | 5.95E-16 | yes |
| IFITM2   | 0.453149244 | 9.135935022 | 7.32E-18 | 6.99E-16 | yes |
| HCLS1    | 0.452658106 | 9.123479739 | 8.02E-18 | 7.63E-16 | yes |
| GPR160   | 0.452463304 | 9.118542436 | 8.32E-18 | 7.88E-16 | yes |
| RNF149   | 0.451658642 | 9.098165487 | 9.66E-18 | 9.11E-16 | yes |
| CFI      | 0.451127161 | 9.084721763 | 1.07E-17 | 1.00E-15 | yes |
| PLBD1    | 0.450799567 | 9.07644138  | 1.13E-17 | 1.06E-15 | yes |
| IL16     | 0.450569904 | 9.070639077 | 1.18E-17 | 1.10E-15 | yes |
| IFI30    | 0.450523772 | 9.069473851 | 1.19E-17 | 1.10E-15 | yes |
| RNF144B  | 0.450460141 | 9.067866788 | 1.21E-17 | 1.11E-15 | yes |
| C3       | 0.450191981 | 9.06109599  | 1.27E-17 | 1.16E-15 | yes |
| SP140L   | 0.450130007 | 9.059531643 | 1.28E-17 | 1.17E-15 | yes |
| CORO1A   | 0.45009094  | 9.058545616 | 1.29E-17 | 1.18E-15 | yes |
| APOBEC3C | 0.449075934 | 9.032949859 | 1.56E-17 | 1.41E-15 | yes |
| FCGR3B   | 0.448998295 | 9.030993806 | 1.58E-17 | 1.43E-15 | yes |
| TCIRG1   | 0.44881866  | 9.026469059 | 1.63E-17 | 1.47E-15 | yes |
| CXCR4    | 0.448736017 | 9.024387852 | 1.66E-17 | 1.48E-15 | yes |
| HAVCR2   | 0.448719177 | 9.023963811 | 1.66E-17 | 1.48E-15 | yes |
| MYO1F    | 0.448584843 | 9.020581587 | 1.70E-17 | 1.51E-15 | yes |
| CD79A    | 0.447434036 | 8.99163818  | 2.10E-17 | 1.85E-15 | yes |
| GALM     | 0.447432985 | 8.991611786 | 2.10E-17 | 1.85E-15 | yes |
| SAMD9L   | 0.447128523 | 8.98396377  | 2.22E-17 | 1.95E-15 | yes |
| IL10RB   | 0.446526092 | 8.96884235  | 2.48E-17 | 2.17E-15 | yes |
| SP140    | 0.446481412 | 8.967721463 | 2.50E-17 | 2.18E-15 | yes |
| LHFPL2   | 0.445944799 | 8.95426595  | 2.76E-17 | 2.39E-15 | yes |
| MILR1    | 0.445475644 | 8.942511822 | 3.01E-17 | 2.59E-15 | yes |
| TRIM14   | 0.445355367 | 8.939499901 | 3.07E-17 | 2.64E-15 | yes |
| IFITM1   | 0.445256605 | 8.937027224 | 3.13E-17 | 2.68E-15 | yes |
| SECTM1   | 0.444940003 | 8.929103203 | 3.31E-17 | 2.82E-15 | yes |
| IL18     | 0.444889069 | 8.927828796 | 3.34E-17 | 2.84E-15 | yes |
| SAMSN1   | 0.444844989 | 8.926725987 | 3.37E-17 | 2.85E-15 | yes |

|          |             |             |          |          |     |
|----------|-------------|-------------|----------|----------|-----|
| GZMB     | 0.443975846 | 8.904997699 | 3.94E-17 | 3.32E-15 | yes |
| HLA-H    | 0.443915417 | 8.903488147 | 3.99E-17 | 3.35E-15 | yes |
| RASSF3   | 0.443145017 | 8.88425652  | 4.58E-17 | 3.83E-15 | yes |
| DPYD     | 0.442953774 | 8.879486263 | 4.74E-17 | 3.95E-15 | yes |
| IGLL5    | 0.442889809 | 8.877891116 | 4.80E-17 | 3.98E-15 | yes |
| SIGLEC7  | 0.442773661 | 8.874995038 | 4.90E-17 | 4.05E-15 | yes |
| C3AR1    | 0.442395006 | 8.86555736  | 5.24E-17 | 4.32E-15 | yes |
| SPATS2L  | 0.442185607 | 8.860340807 | 5.45E-17 | 4.47E-15 | yes |
| TNFRSF9  | 0.442058029 | 8.85716345  | 5.57E-17 | 4.55E-15 | yes |
| EPSTI1   | 0.441649395 | 8.846990856 | 6.00E-17 | 4.88E-15 | yes |
| GBP3     | 0.441546547 | 8.844431621 | 6.11E-17 | 4.95E-15 | yes |
| IGFLR1   | 0.440539793 | 8.819402702 | 7.31E-17 | 5.91E-15 | yes |
| GMFG     | 0.440439104 | 8.816901755 | 7.45E-17 | 5.99E-15 | yes |
| GZMM     | 0.439829272 | 8.801763328 | 8.30E-17 | 6.66E-15 | yes |
| CYTH4    | 0.439737683 | 8.799491027 | 8.44E-17 | 6.74E-15 | yes |
| HLA-DRB1 | 0.439223016 | 8.786728599 | 9.25E-17 | 7.36E-15 | yes |
| COLEC12  | 0.438954995 | 8.780086616 | 9.70E-17 | 7.69E-15 | yes |
| IL10RA   | 0.438695154 | 8.773650127 | 1.02E-16 | 8.03E-15 | yes |
| TNFRSF14 | 0.438607104 | 8.771469666 | 1.03E-16 | 8.13E-15 | yes |
| KLHDC7B  | 0.438459811 | 8.767822824 | 1.06E-16 | 8.31E-15 | yes |
| CD40     | 0.438265712 | 8.763018424 | 1.10E-16 | 8.57E-15 | yes |
| MAN2B1   | 0.438228134 | 8.762088483 | 1.10E-16 | 8.60E-15 | yes |
| RGS18    | 0.437957546 | 8.75539376  | 1.16E-16 | 8.99E-15 | yes |
| TLR7     | 0.437831225 | 8.75226941  | 1.18E-16 | 9.16E-15 | yes |
| KIAA0247 | 0.436701887 | 8.724365469 | 1.45E-16 | 1.11E-14 | yes |
| EHBP1L1  | 0.436184834 | 8.711607053 | 1.58E-16 | 1.22E-14 | yes |
| GPR141   | 0.436145972 | 8.710648537 | 1.60E-16 | 1.22E-14 | yes |
| CD79B    | 0.435693189 | 8.699485443 | 1.73E-16 | 1.32E-14 | yes |
| MPEG1    | 0.435563481 | 8.69628907  | 1.77E-16 | 1.34E-14 | yes |
| PLA2G2D  | 0.435333601 | 8.690625837 | 1.84E-16 | 1.39E-14 | yes |
| SH2D2A   | 0.435079319 | 8.68436385  | 1.92E-16 | 1.45E-14 | yes |
| C1RL     | 0.43458254  | 8.672137531 | 2.10E-16 | 1.58E-14 | yes |
| RGS1     | 0.434405817 | 8.667790533 | 2.17E-16 | 1.62E-14 | yes |
| UNC93B1  | 0.434085743 | 8.659920539 | 2.29E-16 | 1.71E-14 | yes |
| DOK3     | 0.433914629 | 8.655714831 | 2.36E-16 | 1.76E-14 | yes |
| PCED1B   | 0.433736746 | 8.651343969 | 2.43E-16 | 1.80E-14 | yes |
| PLCG2    | 0.433679978 | 8.649949367 | 2.46E-16 | 1.82E-14 | yes |
| CAPZA1   | 0.433448909 | 8.64427403  | 2.56E-16 | 1.88E-14 | yes |
| C1QA     | 0.432941898 | 8.63182858  | 2.80E-16 | 2.05E-14 | yes |
| DEF6     | 0.432770486 | 8.627623277 | 2.88E-16 | 2.11E-14 | yes |
| CXorf21  | 0.432145761 | 8.612306387 | 3.21E-16 | 2.34E-14 | yes |
| C1R      | 0.431809408 | 8.604066054 | 3.41E-16 | 2.47E-14 | yes |
| RARRES3  | 0.431794882 | 8.603710302 | 3.42E-16 | 2.47E-14 | yes |
| CTSZ     | 0.43152384  | 8.597073396 | 3.58E-16 | 2.58E-14 | yes |
| ZC3H12D  | 0.431061913 | 8.585768945 | 3.88E-16 | 2.79E-14 | yes |
| PPM1M    | 0.430852572 | 8.580648623 | 4.02E-16 | 2.88E-14 | yes |
| CLDN23   | 0.43056097  | 8.573519082 | 4.23E-16 | 3.02E-14 | yes |
| RAB20    | 0.430492886 | 8.571854936 | 4.28E-16 | 3.05E-14 | yes |
| HCP5     | 0.430392542 | 8.56940258  | 4.35E-16 | 3.08E-14 | yes |
| RAB32    | 0.430388674 | 8.569308073 | 4.36E-16 | 3.08E-14 | yes |
| CD37     | 0.430061315 | 8.561310396 | 4.61E-16 | 3.25E-14 | yes |

|            |              |              |           |           |     |
|------------|--------------|--------------|-----------|-----------|-----|
| CIDEB      | 0. 429673572 | 8. 551842836 | 4. 93E-16 | 3. 46E-14 | yes |
| RPS6KA1    | 0. 429298839 | 8. 542698457 | 5. 26E-16 | 3. 68E-14 | yes |
| SLC37A2    | 0. 429217346 | 8. 540710549 | 5. 33E-16 | 3. 72E-14 | yes |
| TMEM173    | 0. 429147923 | 8. 539017283 | 5. 40E-16 | 3. 75E-14 | yes |
| USP30-AS1  | 0. 429096021 | 8. 537751478 | 5. 45E-16 | 3. 78E-14 | yes |
| TLR3       | 0. 428511688 | 8. 523507695 | 6. 02E-16 | 4. 16E-14 | yes |
| JAK3       | 0. 428212869 | 8. 516228722 | 6. 34E-16 | 4. 37E-14 | yes |
| PSD4       | 0. 426643129 | 8. 478047229 | 8. 29E-16 | 5. 69E-14 | yes |
| LRRC25     | 0. 426611808 | 8. 477286358 | 8. 34E-16 | 5. 71E-14 | yes |
| APOL6      | 0. 426346905 | 8. 470852561 | 8. 72E-16 | 5. 95E-14 | yes |
| PARP12     | 0. 426070063 | 8. 464131672 | 9. 14E-16 | 6. 21E-14 | yes |
| PARP15     | 0. 426057997 | 8. 463838815 | 9. 16E-16 | 6. 21E-14 | yes |
| CARD6      | 0. 425983133 | 8. 462021866 | 9. 28E-16 | 6. 27E-14 | yes |
| TRPV2      | 0. 424764414 | 8. 43247349  | 1. 14E-15 | 7. 69E-14 | yes |
| KMO        | 0. 424583154 | 8. 428083551 | 1. 18E-15 | 7. 91E-14 | yes |
| LTBR       | 0. 424363064 | 8. 422754824 | 1. 22E-15 | 8. 18E-14 | yes |
| LYN        | 0. 424345298 | 8. 422324775 | 1. 23E-15 | 8. 18E-14 | yes |
| MGAT4A     | 0. 423927545 | 8. 412215639 | 1. 32E-15 | 8. 75E-14 | yes |
| CD2AP      | 0. 423773322 | 8. 408485265 | 1. 35E-15 | 8. 96E-14 | yes |
| PCED1B-AS1 | 0. 423574442 | 8. 403676068 | 1. 40E-15 | 9. 24E-14 | yes |
| CTSC       | 0. 422984235 | 8. 389412683 | 1. 54E-15 | 1. 02E-13 | yes |
| SLC46A3    | 0. 422941705 | 8. 388385386 | 1. 55E-15 | 1. 02E-13 | yes |
| PROCR      | 0. 422810132 | 8. 385207672 | 1. 59E-15 | 1. 04E-13 | yes |
| TRIM22     | 0. 422576376 | 8. 379563666 | 1. 65E-15 | 1. 08E-13 | yes |
| GCH1       | 0. 422537911 | 8. 378635146 | 1. 66E-15 | 1. 08E-13 | yes |
| LAX1       | 0. 422430359 | 8. 376039155 | 1. 69E-15 | 1. 10E-13 | yes |
| TNFRSF10A  | 0. 422137705 | 8. 368977525 | 1. 78E-15 | 1. 15E-13 | yes |
| SLC7A7     | 0. 421757658 | 8. 359811881 | 1. 90E-15 | 1. 22E-13 | yes |
| CMTM6      | 0. 421023822 | 8. 342129043 | 2. 15E-15 | 1. 38E-13 | yes |
| ELK3       | 0. 420935547 | 8. 340003268 | 2. 18E-15 | 1. 40E-13 | yes |
| RGS19      | 0. 420424241 | 8. 327696065 | 2. 37E-15 | 1. 52E-13 | yes |
| KCNK6      | 0. 419798133 | 8. 312638666 | 2. 63E-15 | 1. 68E-13 | yes |
| NOD1       | 0. 419697984 | 8. 310231489 | 2. 68E-15 | 1. 70E-13 | yes |
| DENND1C    | 0. 419463034 | 8. 30458571  | 2. 79E-15 | 1. 77E-13 | yes |
| STAP1      | 0. 419174966 | 8. 297666285 | 2. 92E-15 | 1. 85E-13 | yes |
| KLHL6      | 0. 419029066 | 8. 294162929 | 2. 99E-15 | 1. 89E-13 | yes |
| ZMYM6NB    | 0. 418924688 | 8. 29165706  | 3. 05E-15 | 1. 91E-13 | yes |
| MAN1C1     | 0. 418667187 | 8. 285476801 | 3. 18E-15 | 1. 99E-13 | yes |
| ICAM3      | 0. 418571198 | 8. 283173573 | 3. 23E-15 | 2. 02E-13 | yes |
| TYROBP     | 0. 418536057 | 8. 282330471 | 3. 25E-15 | 2. 02E-13 | yes |
| C1QB       | 0. 418428136 | 8. 279741505 | 3. 31E-15 | 2. 05E-13 | yes |
| PSMB9      | 0. 418379244 | 8. 278568753 | 3. 34E-15 | 2. 07E-13 | yes |
| SERPING1   | 0. 41831648  | 8. 277063388 | 3. 37E-15 | 2. 08E-13 | yes |
| PSMB10     | 0. 418208413 | 8. 274471781 | 3. 43E-15 | 2. 11E-13 | yes |
| FMNL1      | 0. 417428815 | 8. 255788474 | 3. 90E-15 | 2. 40E-13 | yes |
| C2         | 0. 417171085 | 8. 249616766 | 4. 08E-15 | 2. 50E-13 | yes |
| OSTF1      | 0. 416427856 | 8. 231832558 | 4. 61E-15 | 2. 81E-13 | yes |
| GNA15      | 0. 416426079 | 8. 231790056 | 4. 61E-15 | 2. 81E-13 | yes |
| PARVG      | 0. 416266642 | 8. 227977625 | 4. 73E-15 | 2. 87E-13 | yes |
| PSMB8      | 0. 416040085 | 8. 222561797 | 4. 91E-15 | 2. 97E-13 | yes |
| SLC2A9     | 0. 415847251 | 8. 217953554 | 5. 07E-15 | 3. 06E-13 | yes |



|           |              |              |           |           |     |
|-----------|--------------|--------------|-----------|-----------|-----|
| HEXB      | 0. 415770259 | 8. 216114033 | 5. 14E-15 | 3. 09E-13 | yes |
| TMEM37    | 0. 41562994  | 8. 212761993 | 5. 26E-15 | 3. 15E-13 | yes |
| RUNX1     | 0. 415623105 | 8. 212598731 | 5. 26E-15 | 3. 15E-13 | yes |
| CD300LF   | 0. 415307812 | 8. 205069489 | 5. 54E-15 | 3. 31E-13 | yes |
| ARHGAP9   | 0. 415138952 | 8. 201038561 | 5. 70E-15 | 3. 39E-13 | yes |
| HMHA1     | 0. 414512492 | 8. 186092999 | 6. 31E-15 | 3. 75E-13 | yes |
| DDX60L    | 0. 413802653 | 8. 169175229 | 7. 09E-15 | 4. 20E-13 | yes |
| SPI1      | 0. 413695823 | 8. 166630681 | 7. 22E-15 | 4. 26E-13 | yes |
| RTP4      | 0. 412789527 | 8. 145060254 | 8. 37E-15 | 4. 93E-13 | yes |
| ADAM28    | 0. 412389557 | 8. 13554999  | 8. 93E-15 | 5. 25E-13 | yes |
| ARHGAP18  | 0. 412128063 | 8. 129335412 | 9. 32E-15 | 5. 46E-13 | yes |
| NBEAL2    | 0. 412105639 | 8. 128802602 | 9. 36E-15 | 5. 46E-13 | yes |
| NOD2      | 0. 411988829 | 8. 126027397 | 9. 54E-15 | 5. 55E-13 | yes |
| GYPC      | 0. 411959298 | 8. 125325878 | 9. 58E-15 | 5. 57E-13 | yes |
| CD300A    | 0. 411784733 | 8. 12117961  | 9. 86E-15 | 5. 71E-13 | yes |
| UBD       | 0. 411281113 | 8. 109223646 | 1. 07E-14 | 6. 18E-13 | yes |
| LOC284751 | 0. 41073031  | 8. 096157796 | 1. 17E-14 | 6. 74E-13 | yes |
| SERPINA1  | 0. 40989673  | 8. 076404327 | 1. 34E-14 | 7. 69E-13 | yes |
| FCRL5     | 0. 409677283 | 8. 071208115 | 1. 39E-14 | 7. 95E-13 | yes |
| TPP1      | 0. 409031397 | 8. 055924122 | 1. 54E-14 | 8. 80E-13 | yes |
| ZNRF2     | 0. 408831981 | 8. 051208165 | 1. 59E-14 | 9. 06E-13 | yes |
| DRAM1     | 0. 408432344 | 8. 04176138  | 1. 69E-14 | 9. 63E-13 | yes |
| IFI35     | 0. 408364481 | 8. 040157772 | 1. 71E-14 | 9. 71E-13 | yes |
| EDEM2     | 0. 407967936 | 8. 030790486 | 1. 83E-14 | 1. 03E-12 | yes |
| CD180     | 0. 407816025 | 8. 027203447 | 1. 87E-14 | 1. 06E-12 | yes |
| LGALS3BP  | 0. 407737184 | 8. 025342125 | 1. 89E-14 | 1. 07E-12 | yes |
| DOK2      | 0. 407528776 | 8. 020422927 | 1. 96E-14 | 1. 10E-12 | yes |
| F13A1     | 0. 406707033 | 8. 001041348 | 2. 23E-14 | 1. 25E-12 | yes |
| IL1R1     | 0. 406667102 | 8. 000100112 | 2. 25E-14 | 1. 26E-12 | yes |
| FTL       | 0. 406260429 | 7. 99051753  | 2. 40E-14 | 1. 34E-12 | yes |
| CD68      | 0. 406141115 | 7. 98770717  | 2. 45E-14 | 1. 36E-12 | yes |
| MGAT1     | 0. 405332494 | 7. 968673514 | 2. 78E-14 | 1. 54E-12 | yes |
| FAM78A    | 0. 405332235 | 7. 968667424 | 2. 78E-14 | 1. 54E-12 | yes |
| HCST      | 0. 405232192 | 7. 966314131 | 2. 83E-14 | 1. 55E-12 | yes |
| A4GALT    | 0. 40523165  | 7. 966301377 | 2. 83E-14 | 1. 55E-12 | yes |
| ZNF600    | 0. 405137735 | 7. 964092555 | 2. 87E-14 | 1. 57E-12 | yes |
| ST8SIA4   | 0. 405107848 | 7. 963389687 | 2. 88E-14 | 1. 58E-12 | yes |
| BST2      | 0. 404775581 | 7. 955577694 | 3. 04E-14 | 1. 66E-12 | yes |
| C5AR1     | 0. 404392309 | 7. 946571192 | 3. 23E-14 | 1. 76E-12 | yes |
| ETV6      | 0. 404067336 | 7. 938938582 | 3. 40E-14 | 1. 85E-12 | yes |
| ITGB2     | 0. 403857138 | 7. 934003602 | 3. 51E-14 | 1. 90E-12 | yes |
| KIAA0125  | 0. 403170036 | 7. 917882427 | 3. 92E-14 | 2. 12E-12 | yes |
| PECAM1    | 0. 402380725 | 7. 899382896 | 4. 44E-14 | 2. 39E-12 | yes |
| MAN1A1    | 0. 402293013 | 7. 897328432 | 4. 50E-14 | 2. 42E-12 | yes |
| PIGB      | 0. 401904582 | 7. 888233423 | 4. 78E-14 | 2. 56E-12 | yes |
| MR1       | 0. 401866075 | 7. 887332078 | 4. 81E-14 | 2. 57E-12 | yes |
| EBI3      | 0. 401827321 | 7. 886424993 | 4. 84E-14 | 2. 58E-12 | yes |
| IFNG      | 0. 401807529 | 7. 885961735 | 4. 86E-14 | 2. 58E-12 | yes |
| ALPK1     | 0. 401326066 | 7. 874697027 | 5. 24E-14 | 2. 78E-12 | yes |
| PLA2G15   | 0. 401202043 | 7. 871796555 | 5. 34E-14 | 2. 83E-12 | yes |
| TMEM154   | 0. 401034079 | 7. 867869262 | 5. 48E-14 | 2. 90E-12 | yes |

|          |             |             |          |          |     |
|----------|-------------|-------------|----------|----------|-----|
| AIF1     | 0.400983478 | 7.866686297 | 5.53E-14 | 2.91E-12 | yes |
| CTSW     | 0.400798847 | 7.862370711 | 5.69E-14 | 2.99E-12 | yes |
| SWAP70   | 0.400781112 | 7.861956226 | 5.70E-14 | 2.99E-12 | yes |
| CREBL2   | 0.400716924 | 7.86045619  | 5.76E-14 | 3.01E-12 | yes |
| PLK3     | 0.400433074 | 7.853824446 | 6.02E-14 | 3.14E-12 | yes |
| TRAM1    | 0.400200665 | 7.84839653  | 6.25E-14 | 3.25E-12 | yes |
| IL15RA   | 0.399914852 | 7.841723849 | 6.53E-14 | 3.39E-12 | no  |
| CD33     | 0.399660047 | 7.8357774   | 6.80E-14 | 3.52E-12 | no  |
| SNX9     | 0.399063968 | 7.821874965 | 7.46E-14 | 3.85E-12 | no  |
| MB21D1   | 0.398964696 | 7.819560773 | 7.58E-14 | 3.90E-12 | no  |
| CTSD     | 0.398864259 | 7.817219764 | 7.69E-14 | 3.96E-12 | no  |
| LY86     | 0.398837301 | 7.816591476 | 7.73E-14 | 3.96E-12 | no  |
| STAT1    | 0.398058111 | 7.798441959 | 8.72E-14 | 4.46E-12 | no  |
| IRF8     | 0.397740791 | 7.791056418 | 9.16E-14 | 4.68E-12 | no  |
| SIRPB2   | 0.397255294 | 7.779763063 | 9.88E-14 | 5.03E-12 | no  |
| ITGA4    | 0.397181395 | 7.778044745 | 9.99E-14 | 5.08E-12 | no  |
| CFLAR    | 0.397087116 | 7.775852812 | 1.01E-13 | 5.14E-12 | no  |
| CD58     | 0.396992233 | 7.773647128 | 1.03E-13 | 5.20E-12 | no  |
| TLR5     | 0.396839819 | 7.770104674 | 1.05E-13 | 5.31E-12 | no  |
| RIN3     | 0.396793061 | 7.769018056 | 1.06E-13 | 5.34E-12 | no  |
| SLFN12   | 0.3967729   | 7.768549561 | 1.06E-13 | 5.34E-12 | no  |
| RNF19B   | 0.396232272 | 7.755991462 | 1.16E-13 | 5.80E-12 | no  |
| CASP4    | 0.396081177 | 7.752483414 | 1.18E-13 | 5.92E-12 | no  |
| PRSS23   | 0.396015372 | 7.750955846 | 1.20E-13 | 5.96E-12 | no  |
| SH3TC1   | 0.395645963 | 7.742383055 | 1.27E-13 | 6.29E-12 | no  |
| MS4A4A   | 0.395637008 | 7.742175295 | 1.27E-13 | 6.29E-12 | no  |
| FAM20A   | 0.395473149 | 7.738374143 | 1.30E-13 | 6.44E-12 | no  |
| EHD4     | 0.395385159 | 7.736333325 | 1.32E-13 | 6.51E-12 | no  |
| ARHGAP4  | 0.395367412 | 7.735921739 | 1.32E-13 | 6.52E-12 | no  |
| TBC1D2B  | 0.395342787 | 7.735350655 | 1.33E-13 | 6.52E-12 | no  |
| C1QC     | 0.394999789 | 7.72739817  | 1.40E-13 | 6.86E-12 | no  |
| SLC25A43 | 0.394783208 | 7.722378664 | 1.45E-13 | 7.08E-12 | no  |
| IFNGR2   | 0.394716424 | 7.720831177 | 1.46E-13 | 7.12E-12 | no  |
| RAB27A   | 0.394707535 | 7.720625205 | 1.46E-13 | 7.12E-12 | no  |
| FCGR1A   | 0.394699947 | 7.720449394 | 1.46E-13 | 7.12E-12 | no  |
| CXCL10   | 0.394528687 | 7.7164818   | 1.50E-13 | 7.29E-12 | no  |
| FUT4     | 0.394418629 | 7.713932583 | 1.53E-13 | 7.40E-12 | no  |
| MX2      | 0.394209172 | 7.70908212  | 1.58E-13 | 7.63E-12 | no  |
| CTSB     | 0.393909912 | 7.702154514 | 1.65E-13 | 7.97E-12 | no  |
| LSP1     | 0.393577899 | 7.694472102 | 1.74E-13 | 8.36E-12 | no  |
| RBM47    | 0.393466077 | 7.691885447 | 1.77E-13 | 8.49E-12 | no  |
| ST14     | 0.393429973 | 7.691050401 | 1.78E-13 | 8.51E-12 | no  |
| RNF135   | 0.393188737 | 7.685471842 | 1.85E-13 | 8.81E-12 | no  |
| MAFB     | 0.392741683 | 7.675138741 | 1.98E-13 | 9.42E-12 | no  |
| IFI16    | 0.392402133 | 7.667294773 | 2.08E-13 | 9.89E-12 | no  |
| LAIR2    | 0.391972536 | 7.657375913 | 2.22E-13 | 1.05E-11 | no  |
| SLC24A6  | 0.391558684 | 7.647826202 | 2.37E-13 | 1.12E-11 | no  |
| PION     | 0.39151633  | 7.646849189 | 2.38E-13 | 1.12E-11 | no  |
| HEXA     | 0.391375441 | 7.643599592 | 2.43E-13 | 1.15E-11 | no  |
| CD14     | 0.391358637 | 7.643212035 | 2.44E-13 | 1.15E-11 | no  |
| GLIPR1   | 0.391203939 | 7.63964474  | 2.50E-13 | 1.17E-11 | no  |

|           |               |               |           |              |
|-----------|---------------|---------------|-----------|--------------|
| CXCL16    | 0. 390988017  | 7. 63466693   | 2. 58E-13 | 1. 21E-11 no |
| DAB2      | 0. 390909909  | 7. 632866606  | 2. 61E-13 | 1. 22E-11 no |
| DDX60     | 0. 390811817  | 7. 630605951  | 2. 65E-13 | 1. 24E-11 no |
| CLEC10A   | 0. 390618448  | 7. 626150403  | 2. 73E-13 | 1. 27E-11 no |
| STAB1     | 0. 390414287  | 7. 621447508  | 2. 81E-13 | 1. 31E-11 no |
| BST1      | 0. 390366398  | 7. 620344561  | 2. 83E-13 | 1. 31E-11 no |
| M6PR      | 0. 390295728  | 7. 618717079  | 2. 86E-13 | 1. 32E-11 no |
| PYCARD    | 0. 390201168  | 7. 616539662  | 2. 91E-13 | 1. 34E-11 no |
| TRANK1    | 0. 390104621  | 7. 614316787  | 2. 95E-13 | 1. 36E-11 no |
| SQRDL     | 0. 389977772  | 7. 611396685  | 3. 01E-13 | 1. 38E-11 no |
| DSC2      | 0. 389643386  | 7. 603701515  | 3. 16E-13 | 1. 45E-11 no |
| UTS2      | 0. 389459662  | 7. 599475008  | 3. 25E-13 | 1. 49E-11 no |
| HAAO      | 0. 389334693  | 7. 596600736  | 3. 31E-13 | 1. 51E-11 no |
| BTN3A2    | 0. 388437288  | 7. 575975154  | 3. 79E-13 | 1. 73E-11 no |
| CD163     | 0. 388026016  | 7. 56653112   | 4. 03E-13 | 1. 83E-11 no |
| PIK3R6    | 0. 387938626  | 7. 564525074  | 4. 08E-13 | 1. 85E-11 no |
| C7        | 0. 387541274  | 7. 555406834  | 4. 34E-13 | 1. 96E-11 no |
| IRF1      | 0. 387530985  | 7. 555170795  | 4. 34E-13 | 1. 96E-11 no |
| GAL3ST4   | 0. 387328739  | 7. 550531724  | 4. 48E-13 | 2. 02E-11 no |
| S100A11   | 0. 387265103  | 7. 549072321  | 4. 52E-13 | 2. 03E-11 no |
| TMBIM1    | 0. 387208679  | 7. 547778436  | 4. 56E-13 | 2. 04E-11 no |
| WAS       | 0. 386360472  | 7. 528339602  | 5. 17E-13 | 2. 32E-11 no |
| GPM6A     | -0. 386102601 | -7. 522434276 | 5. 38E-13 | 2. 40E-11 no |
| CD8B      | 0. 386093753  | 7. 522231694  | 5. 38E-13 | 2. 40E-11 no |
| F11R      | 0. 386083122  | 7. 52198829   | 5. 39E-13 | 2. 40E-11 no |
| BAK1      | 0. 385395691  | 7. 506256481  | 5. 97E-13 | 2. 65E-11 no |
| RNASE2    | 0. 385388992  | 7. 506103226  | 5. 98E-13 | 2. 65E-11 no |
| LINC00601 | 0. 385297514  | 7. 504010897  | 6. 06E-13 | 2. 68E-11 no |
| OAS2      | 0. 385056716  | 7. 498504461  | 6. 28E-13 | 2. 77E-11 no |
| ATP6VOE1  | 0. 384114879  | 7. 476984264  | 7. 22E-13 | 3. 18E-11 no |
| TBC1D8B   | 0. 383886564  | 7. 471771588  | 7. 47E-13 | 3. 28E-11 no |
| RILPL2    | 0. 383857904  | 7. 471117371  | 7. 50E-13 | 3. 29E-11 no |
| PQLC3     | 0. 38346941   | 7. 462251651  | 7. 95E-13 | 3. 48E-11 no |
| EMBP1     | 0. 382882292  | 7. 448862035  | 8. 66E-13 | 3. 78E-11 no |
| MYL12A    | 0. 382786311  | 7. 446674119  | 8. 79E-13 | 3. 83E-11 no |
| DNASE2    | 0. 382767965  | 7. 446255959  | 8. 81E-13 | 3. 83E-11 no |
| GBP1      | 0. 38259951   | 7. 44241676   | 9. 03E-13 | 3. 92E-11 no |
| MS4A1     | 0. 382535196  | 7. 440951242  | 9. 12E-13 | 3. 95E-11 no |
| CFD       | 0. 382122697  | 7. 431554624  | 9. 69E-13 | 4. 19E-11 no |
| NTAN1     | 0. 382010563  | 7. 429001153  | 9. 85E-13 | 4. 25E-11 no |
| SPPL2A    | 0. 381851991  | 7. 425390846  | 1. 01E-12 | 4. 34E-11 no |
| STK10     | 0. 381824381  | 7. 424762323  | 1. 01E-12 | 4. 35E-11 no |
| LOC283143 | 0. 381559935  | 7. 418743469  | 1. 05E-12 | 4. 51E-11 no |
| C19orf38  | 0. 381396763  | 7. 415030678  | 1. 08E-12 | 4. 61E-11 no |
| MAPKAPK2  | 0. 381123564  | 7. 408816201  | 1. 12E-12 | 4. 79E-11 no |
| RPS6KA3   | 0. 380483064  | 7. 394255598  | 1. 23E-12 | 5. 25E-11 no |
| GGA2      | 0. 380285971  | 7. 389777543  | 1. 27E-12 | 5. 40E-11 no |
| GNGT2     | 0. 380166297  | 7. 38705907   | 1. 29E-12 | 5. 48E-11 no |
| TGFB1     | 0. 380144951  | 7. 386574221  | 1. 29E-12 | 5. 49E-11 no |
| GLA       | 0. 380106668  | 7. 385704717  | 1. 30E-12 | 5. 51E-11 no |
| HLA-DRB3  | 0. 380012161  | 7. 383558389  | 1. 32E-12 | 5. 57E-11 no |

|              |              |               |           |              |
|--------------|--------------|---------------|-----------|--------------|
| NLRC5        | 0. 379751182 | 7. 377632803  | 1. 37E-12 | 5. 78E-11 no |
| ACP5         | 0. 379692402 | 7. 376298474  | 1. 38E-12 | 5. 82E-11 no |
| LINC00324    | 0. 379552954 | 7. 373133341  | 1. 41E-12 | 5. 92E-11 no |
| CCRL2        | 0. 37954912  | 7. 37304633   | 1. 41E-12 | 5. 92E-11 no |
| GCLM         | 0. 379387873 | 7. 369387204  | 1. 45E-12 | 6. 05E-11 no |
| ARHGAP29     | 0. 379333717 | 7. 368158426  | 1. 46E-12 | 6. 08E-11 no |
| NFE2L3       | 0. 37922043  | 7. 365588266  | 1. 48E-12 | 6. 17E-11 no |
| ISG20        | 0. 37904559  | 7. 361622438  | 1. 52E-12 | 6. 32E-11 no |
| LTBP2        | 0. 378725628 | 7. 354367229  | 1. 59E-12 | 6. 61E-11 no |
| LINC00525    | 0. 378233797 | 7. 34322085   | 1. 71E-12 | 7. 08E-11 no |
| LOC100132987 | 0. 378051255 | 7. 339085742  | 1. 76E-12 | 7. 26E-11 no |
| CD55         | 0. 377870429 | 7. 334990502  | 1. 80E-12 | 7. 44E-11 no |
| LGALS9       | 0. 377575666 | 7. 328316973  | 1. 88E-12 | 7. 74E-11 no |
| PSAP         | 0. 377127244 | 7. 318169535  | 2. 01E-12 | 8. 25E-11 no |
| REEP4        | 0. 376929476 | 7. 313696105  | 2. 07E-12 | 8. 47E-11 no |
| HLA-DQB1     | 0. 376794426 | 7. 310641986  | 2. 11E-12 | 8. 62E-11 no |
| CLECT7A      | 0. 376679957 | 7. 308053747  | 2. 14E-12 | 8. 75E-11 no |
| SLFN5        | 0. 376281906 | 7. 299056483  | 2. 27E-12 | 9. 25E-11 no |
| TGFBR2       | 0. 376098306 | 7. 294908113  | 2. 33E-12 | 9. 48E-11 no |
| UBA7         | 0. 375987464 | 7. 292404154  | 2. 37E-12 | 9. 61E-11 no |
| C20orf197    | 0. 375829078 | 7. 288826812  | 2. 42E-12 | 9. 82E-11 no |
| FAM129A      | 0. 375444506 | 7. 280143866  | 2. 56E-12 | 1. 04E-10 no |
| SIGLEC9      | 0. 374985359 | 7. 269782871  | 2. 73E-12 | 1. 10E-10 no |
| UCP2         | 0. 374650587 | 7. 262232425  | 2. 87E-12 | 1. 16E-10 no |
| A2M          | 0. 374496741 | 7. 258763683  | 2. 93E-12 | 1. 18E-10 no |
| TXNDC11      | 0. 374208756 | 7. 252272424  | 3. 05E-12 | 1. 23E-10 no |
| CXCL12       | 0. 373977221 | 7. 247055323  | 3. 16E-12 | 1. 27E-10 no |
| PARP4        | 0. 373806191 | 7. 243202586  | 3. 24E-12 | 1. 29E-10 no |
| SIGIRR       | 0. 373340268 | 7. 232711213  | 3. 46E-12 | 1. 38E-10 no |
| ARRDC2       | 0. 37331104  | 7. 23205329   | 3. 47E-12 | 1. 38E-10 no |
| RIPK1        | 0. 373297165 | 7. 231740952  | 3. 48E-12 | 1. 38E-10 no |
| ALOX5        | 0. 373243396 | 7. 230530695  | 3. 51E-12 | 1. 39E-10 no |
| NCF1         | 0. 373106049 | 7. 227439608  | 3. 58E-12 | 1. 42E-10 no |
| TNFRSF11B    | 0. 37300407  | 7. 225144853  | 3. 63E-12 | 1. 44E-10 no |
| SAT1         | 0. 372687042 | 7. 218012966  | 3. 80E-12 | 1. 50E-10 no |
| MSN          | 0. 37268216  | 7. 217903168  | 3. 80E-12 | 1. 50E-10 no |
| DENND3       | 0. 372627641 | 7. 216676997  | 3. 83E-12 | 1. 51E-10 no |
| CPQ          | 0. 372352128 | 7. 210481897  | 3. 98E-12 | 1. 56E-10 no |
| PILRA        | 0. 372086482 | 7. 204510762  | 4. 13E-12 | 1. 62E-10 no |
| LHFPL4       | -0. 37206114 | -7. 203941226 | 4. 15E-12 | 1. 62E-10 no |
| SP110        | 0. 371838517 | 7. 198938899  | 4. 28E-12 | 1. 67E-10 no |
| CSF1R        | 0. 371680946 | 7. 195399163  | 4. 38E-12 | 1. 71E-10 no |
| APOBEC3F     | 0. 371172716 | 7. 183986978  | 4. 71E-12 | 1. 83E-10 no |
| LST1         | 0. 370685476 | 7. 173053144  | 5. 04E-12 | 1. 96E-10 no |
| NCKAP1L      | 0. 370430653 | 7. 167337566  | 5. 23E-12 | 2. 02E-10 no |
| DGKA         | 0. 37042857  | 7. 167290853  | 5. 23E-12 | 2. 02E-10 no |
| OASL         | 0. 370369602 | 7. 16596849   | 5. 27E-12 | 2. 04E-10 no |
| BHLHE40      | 0. 370274999 | 7. 163847219  | 5. 34E-12 | 2. 06E-10 no |
| LOC283194    | 0. 370188501 | 7. 161907931  | 5. 41E-12 | 2. 08E-10 no |
| SSH1         | 0. 370071867 | 7. 15929331   | 5. 50E-12 | 2. 11E-10 no |
| HLA-DPB2     | 0. 369912682 | 7. 155725467  | 5. 62E-12 | 2. 16E-10 no |

|           |               |               |           |              |
|-----------|---------------|---------------|-----------|--------------|
| RFTN1     | 0. 369875692  | 7. 154896483  | 5. 65E-12 | 2. 17E-10 no |
| SEL1L3    | 0. 369854249  | 7. 154415976  | 5. 67E-12 | 2. 17E-10 no |
| SHKBP1    | 0. 369718775  | 7. 151380353  | 5. 78E-12 | 2. 21E-10 no |
| IL2RA     | 0. 369003907  | 7. 135370799  | 6. 39E-12 | 2. 44E-10 no |
| HK3       | 0. 368979857  | 7. 134832444  | 6. 41E-12 | 2. 44E-10 no |
| GIMAP6    | 0. 368472758  | 7. 123485146  | 6. 89E-12 | 2. 61E-10 no |
| B3GNT2    | 0. 368149145  | 7. 116247551  | 7. 21E-12 | 2. 73E-10 no |
| LOC283587 | 0. 368062958  | 7. 114320475  | 7. 29E-12 | 2. 75E-10 no |
| GPR183    | 0. 368062635  | 7. 114313263  | 7. 29E-12 | 2. 75E-10 no |
| INPP5D    | 0. 367935761  | 7. 111476846  | 7. 42E-12 | 2. 80E-10 no |
| SYNGR2    | 0. 36763605   | 7. 104778295  | 7. 74E-12 | 2. 91E-10 no |
| FCGR1C    | 0. 367193457  | 7. 094891015  | 8. 24E-12 | 3. 09E-10 no |
| TOR4A     | 0. 36702933   | 7. 091225941  | 8. 43E-12 | 3. 16E-10 no |
| TLN1      | 0. 36682209   | 7. 08659919   | 8. 67E-12 | 3. 25E-10 no |
| CLECL1    | 0. 366620702  | 7. 082104259  | 8. 92E-12 | 3. 33E-10 no |
| ZNFX1     | 0. 366590054  | 7. 081420302  | 8. 96E-12 | 3. 34E-10 no |
| CPVL      | 0. 366313506  | 7. 07524994   | 9. 31E-12 | 3. 47E-10 no |
| C10orf11  | 0. 366217092  | 7. 073099256  | 9. 44E-12 | 3. 51E-10 no |
| FAP       | 0. 366076364  | 7. 069960532  | 9. 62E-12 | 3. 57E-10 no |
| TNFAIP8L2 | 0. 365961862  | 7. 06740716   | 9. 78E-12 | 3. 62E-10 no |
| SEC24D    | 0. 36574445   | 7. 062559912  | 1. 01E-11 | 3. 73E-10 no |
| RNPEPL1   | 0. 365517153  | 7. 057493733  | 1. 04E-11 | 3. 84E-10 no |
| CYBASC3   | 0. 365484478  | 7. 056765556  | 1. 04E-11 | 3. 85E-10 no |
| LRMP      | 0. 364998558  | 7. 04594028   | 1. 12E-11 | 4. 11E-10 no |
| KIAA1217  | 0. 364992914  | 7. 045814584  | 1. 12E-11 | 4. 11E-10 no |
| GNS       | 0. 364968491  | 7. 04527066   | 1. 12E-11 | 4. 12E-10 no |
| HNRNPUL2  | -0. 364885145 | -7. 043414631 | 1. 14E-11 | 4. 16E-10 no |
| GPX8      | 0. 364861883  | 7. 042896646  | 1. 14E-11 | 4. 16E-10 no |
| SOCS1     | 0. 364854095  | 7. 042723218  | 1. 14E-11 | 4. 16E-10 no |
| HLA-DOB   | 0. 364796189  | 7. 041433873  | 1. 15E-11 | 4. 19E-10 no |
| IFIH1     | 0. 36465663   | 7. 038326816  | 1. 17E-11 | 4. 26E-10 no |
| ZNF217    | 0. 364230035  | 7. 028832748  | 1. 24E-11 | 4. 51E-10 no |
| CARD16    | 0. 364144316  | 7. 026925664  | 1. 26E-11 | 4. 55E-10 no |
| OLFML3    | 0. 364140099  | 7. 026831839  | 1. 26E-11 | 4. 55E-10 no |
| KIAA1551  | 0. 364099039  | 7. 025918411  | 1. 27E-11 | 4. 57E-10 no |
| APOBEC3H  | 0. 363734555  | 7. 017812019  | 1. 33E-11 | 4. 80E-10 no |
| ACSL5     | 0. 363567695  | 7. 01410217   | 1. 36E-11 | 4. 90E-10 no |
| FPR1      | 0. 363366609  | 7. 009632412  | 1. 40E-11 | 5. 03E-10 no |
| ZFYVE20   | -0. 363265118 | -7. 007376887 | 1. 42E-11 | 5. 10E-10 no |
| BRSK2     | -0. 363085077 | -7. 003376366 | 1. 46E-11 | 5. 22E-10 no |
| SLC12A7   | 0. 363054818  | 7. 002704115  | 1. 46E-11 | 5. 23E-10 no |
| RNASSET2  | 0. 362820488  | 6. 997498858  | 1. 51E-11 | 5. 39E-10 no |
| CYP2S1    | 0. 362700955  | 6. 994844216  | 1. 54E-11 | 5. 47E-10 no |
| PUS10     | 0. 362663397  | 6. 994010195  | 1. 54E-11 | 5. 49E-10 no |
| MICB      | 0. 362546292  | 6. 991409966  | 1. 57E-11 | 5. 57E-10 no |
| CLEC2B    | 0. 362518427  | 6. 99079131   | 1. 57E-11 | 5. 58E-10 no |
| GPX1      | 0. 362187865  | 6. 983453788  | 1. 65E-11 | 5. 83E-10 no |
| IQGAP1    | 0. 362153314  | 6. 982687042  | 1. 66E-11 | 5. 85E-10 no |
| FKBP15    | 0. 362125375  | 6. 982067033  | 1. 66E-11 | 5. 85E-10 no |
| IL4R      | 0. 362120707  | 6. 981963451  | 1. 66E-11 | 5. 85E-10 no |
| NAIP      | 0. 362112866  | 6. 981789452  | 1. 66E-11 | 5. 85E-10 no |

|              |              |              |           |              |
|--------------|--------------|--------------|-----------|--------------|
| HHEX         | 0. 362083915 | 6. 981147038 | 1. 67E-11 | 5. 87E-10 no |
| RHOG         | 0. 361918116 | 6. 977468395 | 1. 71E-11 | 5. 99E-10 no |
| GXYLT2       | 0. 361677644 | 6. 972134321 | 1. 77E-11 | 6. 18E-10 no |
| ZBP1         | 0. 361510168 | 6. 968420364 | 1. 81E-11 | 6. 32E-10 no |
| GPR55        | 0. 361381572 | 6. 965569122 | 1. 84E-11 | 6. 42E-10 no |
| SIGLEC17P    | 0. 361350445 | 6. 96487905  | 1. 85E-11 | 6. 44E-10 no |
| ADPGK        | 0. 360797516 | 6. 952625218 | 1. 99E-11 | 6. 93E-10 no |
| TES          | 0. 360534777 | 6. 946805436 | 2. 07E-11 | 7. 17E-10 no |
| POU2AF1      | 0. 360315256 | 6. 941944399 | 2. 13E-11 | 7. 38E-10 no |
| 42248        | 0. 360144888 | 6. 938172727 | 2. 18E-11 | 7. 54E-10 no |
| ZC3HAV1      | 0. 36000697  | 6. 935120014 | 2. 22E-11 | 7. 67E-10 no |
| RGS10        | 0. 359878613 | 6. 9322794   | 2. 26E-11 | 7. 79E-10 no |
| AOAH         | 0. 359771855 | 6. 929917137 | 2. 29E-11 | 7. 89E-10 no |
| APOL3        | 0. 359737043 | 6. 929146906 | 2. 30E-11 | 7. 92E-10 no |
| ATG4A        | 0. 359470708 | 6. 92325525  | 2. 39E-11 | 8. 19E-10 no |
| TMEM150A     | 0. 359464052 | 6. 923108032 | 2. 39E-11 | 8. 19E-10 no |
| GMIP         | 0. 359256852 | 6. 91852588  | 2. 46E-11 | 8. 41E-10 no |
| PLXDC2       | 0. 359081679 | 6. 914652939 | 2. 52E-11 | 8. 60E-10 no |
| ITGAM        | 0. 358994899 | 6. 912734592 | 2. 55E-11 | 8. 69E-10 no |
| ASCL2        | 0. 358656654 | 6. 905259387 | 2. 67E-11 | 9. 08E-10 no |
| ASPN         | 0. 358558636 | 6. 903093771 | 2. 70E-11 | 9. 19E-10 no |
| C1RL-AS1     | 0. 35838429  | 6. 899242415 | 2. 77E-11 | 9. 40E-10 no |
| LAT2         | 0. 358273703 | 6. 896799953 | 2. 81E-11 | 9. 52E-10 no |
| IL17RA       | 0. 358243946 | 6. 896142777 | 2. 82E-11 | 9. 55E-10 no |
| BTN2A2       | 0. 357814418 | 6. 886659561 | 2. 99E-11 | 1. 01E-09 no |
| CYBA         | 0. 357681938 | 6. 883735642 | 3. 04E-11 | 1. 03E-09 no |
| METRNL       | 0. 357424606 | 6. 878057518 | 3. 15E-11 | 1. 06E-09 no |
| CASP8        | 0. 357325803 | 6. 875877894 | 3. 19E-11 | 1. 07E-09 no |
| CD74         | 0. 357324161 | 6. 875841659 | 3. 19E-11 | 1. 07E-09 no |
| ODF3B        | 0. 357170535 | 6. 872453122 | 3. 26E-11 | 1. 09E-09 no |
| S100A4       | 0. 357161301 | 6. 872249468 | 3. 27E-11 | 1. 09E-09 no |
| SOCS3        | 0. 357037513 | 6. 869519569 | 3. 32E-11 | 1. 11E-09 no |
| PLXND1       | 0. 356998023 | 6. 868648794 | 3. 34E-11 | 1. 11E-09 no |
| LGMN         | 0. 356896411 | 6. 866408358 | 3. 38E-11 | 1. 13E-09 no |
| HLA-F-AS1    | 0. 356848373 | 6. 865349263 | 3. 41E-11 | 1. 13E-09 no |
| DNAJC5B      | 0. 35669963  | 6. 86207036  | 3. 47E-11 | 1. 15E-09 no |
| GIT2         | 0. 356584838 | 6. 859540256 | 3. 53E-11 | 1. 17E-09 no |
| ARHGAP25     | 0. 356529943 | 6. 858330475 | 3. 56E-11 | 1. 18E-09 no |
| TSPAN4       | 0. 356370408 | 6. 854815035 | 3. 63E-11 | 1. 20E-09 no |
| CD93         | 0. 356291747 | 6. 853081963 | 3. 67E-11 | 1. 21E-09 no |
| CFB          | 0. 356233229 | 6. 851792785 | 3. 70E-11 | 1. 22E-09 no |
| S100Z        | 0. 355218107 | 6. 829443912 | 4. 24E-11 | 1. 40E-09 no |
| HPS3         | 0. 355154363 | 6. 828041459 | 4. 28E-11 | 1. 41E-09 no |
| SERPINA3     | 0. 354717889 | 6. 818441303 | 4. 53E-11 | 1. 49E-09 no |
| VMO1         | 0. 354606896 | 6. 816000861 | 4. 60E-11 | 1. 51E-09 no |
| NQO1         | 0. 354364571 | 6. 810673901 | 4. 75E-11 | 1. 55E-09 no |
| LOC100505622 | 0. 354082884 | 6. 804483651 | 4. 93E-11 | 1. 61E-09 no |
| HLA-A        | 0. 354015718 | 6. 803007942 | 4. 98E-11 | 1. 62E-09 no |
| HDAC7        | 0. 353942338 | 6. 801395843 | 5. 03E-11 | 1. 63E-09 no |
| TTC12        | 0. 353941976 | 6. 801387882 | 5. 03E-11 | 1. 63E-09 no |
| TAP2         | 0. 353859063 | 6. 799566531 | 5. 08E-11 | 1. 65E-09 no |

|           |               |               |           |              |
|-----------|---------------|---------------|-----------|--------------|
| TNFRSF1A  | 0. 353853615  | 6. 799446865  | 5. 09E-11 | 1. 65E-09 no |
| HTRA4     | 0. 35374782   | 6. 797123145  | 5. 16E-11 | 1. 67E-09 no |
| ARL14EPL  | 0. 353609424  | 6. 7940838    | 5. 26E-11 | 1. 70E-09 no |
| OSMR      | 0. 353585108  | 6. 793549849  | 5. 27E-11 | 1. 70E-09 no |
| C1orf54   | 0. 353567752  | 6. 793168746  | 5. 29E-11 | 1. 70E-09 no |
| SAMD3     | 0. 353433809  | 6. 79022782   | 5. 38E-11 | 1. 73E-09 no |
| AMIGO2    | 0. 353134844  | 6. 783665346  | 5. 60E-11 | 1. 80E-09 no |
| AMICA1    | 0. 353063597  | 6. 782101783  | 5. 65E-11 | 1. 81E-09 no |
| HLA-DQB2  | 0. 35304317   | 6. 781653512  | 5. 67E-11 | 1. 82E-09 no |
| TMSB4X    | 0. 352479766  | 6. 769294237  | 6. 11E-11 | 1. 95E-09 no |
| VASN      | 0. 352233696  | 6. 763898901  | 6. 31E-11 | 2. 02E-09 no |
| ITGB5     | 0. 352122346  | 6. 761457958  | 6. 41E-11 | 2. 04E-09 no |
| RUNX2     | 0. 351799228  | 6. 754376646  | 6. 69E-11 | 2. 13E-09 no |
| FYCO1     | 0. 351696916  | 6. 752134987  | 6. 78E-11 | 2. 15E-09 no |
| TTC7A     | 0. 351549173  | 6. 748898424  | 6. 91E-11 | 2. 19E-09 no |
| C17orf96  | -0. 351322945 | -6. 743943634 | 7. 12E-11 | 2. 26E-09 no |
| SIGLEC1   | 0. 351284854  | 6. 743109503  | 7. 16E-11 | 2. 26E-09 no |
| TIFAB     | 0. 35071389   | 6. 730610965  | 7. 72E-11 | 2. 44E-09 no |
| PODNL1    | 0. 350594398  | 6. 727996343  | 7. 84E-11 | 2. 47E-09 no |
| IGSF6     | 0. 350506724  | 6. 726078161  | 7. 93E-11 | 2. 50E-09 no |
| ACP2      | 0. 350485975  | 6. 725624225  | 7. 95E-11 | 2. 50E-09 no |
| GNG10     | 0. 350326226  | 6. 722129777  | 8. 12E-11 | 2. 55E-09 no |
| DRAM2     | 0. 350324023  | 6. 722081597  | 8. 12E-11 | 2. 55E-09 no |
| SPN       | 0. 350318585  | 6. 721962648  | 8. 13E-11 | 2. 55E-09 no |
| DNAJC18   | -0. 349792351 | -6. 710456274 | 8. 71E-11 | 2. 73E-09 no |
| VENTX     | 0. 349742032  | 6. 709356411  | 8. 77E-11 | 2. 74E-09 no |
| KCTD9     | 0. 349704382  | 6. 708533509  | 8. 81E-11 | 2. 75E-09 no |
| TNFRSF10D | 0. 349695724  | 6. 708344267  | 8. 82E-11 | 2. 75E-09 no |
| KBTBD6    | -0. 349680592 | -6. 708013534 | 8. 84E-11 | 2. 75E-09 no |
| BAI3      | -0. 349616971 | -6. 706623109 | 8. 91E-11 | 2. 77E-09 no |
| NNMT      | 0. 349614993  | 6. 70657988   | 8. 92E-11 | 2. 77E-09 no |
| LRCH1     | 0. 349588643  | 6. 706004045  | 8. 95E-11 | 2. 77E-09 no |
| BCL3      | 0. 349581421  | 6. 705846211  | 8. 96E-11 | 2. 77E-09 no |
| C10orf10  | 0. 349506364  | 6. 704206072  | 9. 05E-11 | 2. 79E-09 no |
| AHR       | 0. 349453673  | 6. 703054734  | 9. 11E-11 | 2. 81E-09 no |
| TIFA      | 0. 349419208  | 6. 702301699  | 9. 15E-11 | 2. 82E-09 no |
| NAPSB     | 0. 349382576  | 6. 701501366  | 9. 19E-11 | 2. 83E-09 no |
| TIGIT     | 0. 349286788  | 6. 6994087    | 9. 31E-11 | 2. 86E-09 no |
| PPCS      | 0. 349213355  | 6. 697804603  | 9. 40E-11 | 2. 88E-09 no |
| SOD2      | 0. 349151179  | 6. 69644652   | 9. 48E-11 | 2. 90E-09 no |
| ICAM1     | 0. 349046205  | 6. 694153814  | 9. 61E-11 | 2. 94E-09 no |
| TNFSF13   | 0. 349039469  | 6. 694006724  | 9. 62E-11 | 2. 94E-09 no |
| GAS6      | 0. 348787774  | 6. 688510785  | 9. 94E-11 | 3. 03E-09 no |
| CCL22     | 0. 348765149  | 6. 688016825  | 9. 97E-11 | 3. 03E-09 no |
| FUCA2     | 0. 34868939   | 6. 686362952  | 1. 01E-10 | 3. 06E-09 no |
| TNFAIP3   | 0. 348568166  | 6. 683716829  | 1. 02E-10 | 3. 11E-09 no |
| ZNF519    | -0. 348225258 | -6. 676233793 | 1. 07E-10 | 3. 24E-09 no |
| CREB3L2   | 0. 348203067  | 6. 67574964   | 1. 07E-10 | 3. 25E-09 no |
| GIMAP7    | 0. 348135707  | 6. 674280106  | 1. 08E-10 | 3. 27E-09 no |
| RNF213    | 0. 348111879  | 6. 673760291  | 1. 09E-10 | 3. 28E-09 no |
| MANBA     | 0. 347912878  | 6. 669419617  | 1. 11E-10 | 3. 36E-09 no |

|              |              |              |          |             |
|--------------|--------------|--------------|----------|-------------|
| CXXC4        | -0.347882039 | -6.668747049 | 1.12E-10 | 3.37E-09 no |
| OLFML2B      | 0.347611728  | 6.6628528    | 1.16E-10 | 3.48E-09 no |
| CLIC2        | 0.347465727  | 6.659669974  | 1.18E-10 | 3.55E-09 no |
| GIMAP8       | 0.347444257  | 6.659201977  | 1.18E-10 | 3.55E-09 no |
| FAM57B       | -0.347356642 | -6.657292263 | 1.20E-10 | 3.59E-09 no |
| CRB2         | 0.347028281  | 6.650136912  | 1.25E-10 | 3.74E-09 no |
| TM6SF1       | 0.34696307   | 6.648716224  | 1.26E-10 | 3.76E-09 no |
| UBASH3A      | 0.346885205  | 6.647020015  | 1.27E-10 | 3.80E-09 no |
| RAB38        | 0.346720215  | 6.64342636   | 1.30E-10 | 3.87E-09 no |
| CLEC6A       | 0.346716097  | 6.643336667  | 1.30E-10 | 3.87E-09 no |
| ICMT         | 0.346474749  | 6.638081144  | 1.34E-10 | 3.99E-09 no |
| TBKBP1       | -0.346327233 | -6.634869612 | 1.37E-10 | 4.06E-09 no |
| SCAMP2       | 0.346241823  | 6.633010435  | 1.39E-10 | 4.10E-09 no |
| AMPD3        | 0.346173518  | 6.631523729  | 1.40E-10 | 4.13E-09 no |
| LOC100130476 | 0.346158404  | 6.631194774  | 1.40E-10 | 4.13E-09 no |
| SRSF12       | -0.346127468 | -6.630521494 | 1.41E-10 | 4.15E-09 no |
| ACVR2B       | -0.345928724 | -6.626196594 | 1.44E-10 | 4.25E-09 no |
| IFI44        | 0.345757529  | 6.622472014  | 1.48E-10 | 4.34E-09 no |
| GBP2         | 0.34555089   | 6.617977293  | 1.52E-10 | 4.45E-09 no |
| TMEM86A      | 0.345505884  | 6.616998486  | 1.52E-10 | 4.47E-09 no |
| HGF          | 0.345178417  | 6.609878191  | 1.59E-10 | 4.66E-09 no |
| CCDC109B     | 0.345100877  | 6.608192592  | 1.61E-10 | 4.70E-09 no |
| UBQLN4       | -0.345027546 | -6.606598632 | 1.62E-10 | 4.73E-09 no |
| PODXL2       | -0.34499009  | -6.605784539 | 1.63E-10 | 4.75E-09 no |
| SIPA1        | 0.344934111  | 6.604567897  | 1.64E-10 | 4.78E-09 no |
| MIR155HG     | 0.344471294  | 6.59451217   | 1.74E-10 | 5.07E-09 no |
| JMY          | -0.344289937 | -6.590573269 | 1.78E-10 | 5.18E-09 no |
| TMCO4        | 0.344149472  | 6.587523073  | 1.82E-10 | 5.27E-09 no |
| EDEM1        | 0.344120741  | 6.586899243  | 1.82E-10 | 5.28E-09 no |
| CRTAM        | 0.34404651   | 6.585287582  | 1.84E-10 | 5.32E-09 no |
| PDIA3        | 0.343972171  | 6.583673708  | 1.86E-10 | 5.37E-09 no |
| LIMK2        | 0.343940677  | 6.582990033  | 1.87E-10 | 5.38E-09 no |
| APBB1IP      | 0.343916291  | 6.582460671  | 1.87E-10 | 5.39E-09 no |
| STARD5       | 0.343825018  | 6.580479507  | 1.89E-10 | 5.45E-09 no |
| PRDM1        | 0.343738557  | 6.57860297   | 1.91E-10 | 5.50E-09 no |
| SNAP23       | 0.343731443  | 6.578448571  | 1.92E-10 | 5.50E-09 no |
| TNFSF10      | 0.343600988  | 6.575617587  | 1.95E-10 | 5.58E-09 no |
| PIP4K2B      | -0.343531327 | -6.574106071 | 1.97E-10 | 5.63E-09 no |
| SLC2A5       | 0.343471777  | 6.57281403   | 1.98E-10 | 5.66E-09 no |
| WHSC1        | -0.343356868 | -6.570321131 | 2.01E-10 | 5.74E-09 no |
| IL32         | 0.343347778  | 6.570123935  | 2.01E-10 | 5.74E-09 no |
| BTN3A3       | 0.343310752  | 6.569320768  | 2.02E-10 | 5.76E-09 no |
| JAK2         | 0.343197066  | 6.566854864  | 2.05E-10 | 5.83E-09 no |
| LOC100507463 | 0.343112646  | 6.565023983  | 2.07E-10 | 5.89E-09 no |
| RNF166       | 0.343004373  | 6.562676029  | 2.10E-10 | 5.97E-09 no |
| IL4I1        | 0.342768175  | 6.557554992  | 2.17E-10 | 6.14E-09 no |
| SLC11A1      | 0.342682752  | 6.555703262  | 2.19E-10 | 6.20E-09 no |
| CD99P1       | 0.342574247  | 6.553351461  | 2.22E-10 | 6.28E-09 no |
| INHBA        | 0.342481677  | 6.551345283  | 2.25E-10 | 6.35E-09 no |
| CXorf38      | 0.342434257  | 6.550317688  | 2.26E-10 | 6.38E-09 no |
| GIMAP1       | 0.342361172  | 6.548734008  | 2.28E-10 | 6.43E-09 no |



|              |              |              |          |             |
|--------------|--------------|--------------|----------|-------------|
| LBX2-AS1     | 0.342145049  | 6.544051687  | 2.35E-10 | 6.60E-09 no |
| C11orf75     | 0.341984851  | 6.540581731  | 2.40E-10 | 6.73E-09 no |
| FCGR2C       | 0.341934323  | 6.539487401  | 2.41E-10 | 6.76E-09 no |
| MBOAT1       | 0.341888308  | 6.53849088   | 2.43E-10 | 6.79E-09 no |
| CEACAM21     | 0.341873975  | 6.538180483  | 2.43E-10 | 6.80E-09 no |
| LOC389641    | 0.341718249  | 6.53480845   | 2.48E-10 | 6.92E-09 no |
| RELB         | 0.341390184  | 6.527706651  | 2.59E-10 | 7.21E-09 no |
| PRPS2        | 0.341271503  | 6.525138162  | 2.63E-10 | 7.31E-09 no |
| RARRES1      | 0.341040497  | 6.520139746  | 2.70E-10 | 7.52E-09 no |
| CCR6         | 0.341007752  | 6.519431336  | 2.72E-10 | 7.54E-09 no |
| CHPF2        | 0.340749674  | 6.513848946  | 2.81E-10 | 7.78E-09 no |
| ARID3A       | 0.340698902  | 6.512750917  | 2.83E-10 | 7.82E-09 no |
| DSE          | 0.340597683  | 6.510562074  | 2.86E-10 | 7.91E-09 no |
| CLEC2D       | 0.340593251  | 6.510466228  | 2.86E-10 | 7.91E-09 no |
| TNFSF12      | 0.340537008  | 6.509250103  | 2.88E-10 | 7.96E-09 no |
| EMR1         | 0.3404393    | 6.507137575  | 2.92E-10 | 8.05E-09 no |
| PYGL         | 0.340341708  | 6.505027799  | 2.96E-10 | 8.14E-09 no |
| TNFAIP2      | 0.340186881  | 6.501681156  | 3.02E-10 | 8.29E-09 no |
| VNN2         | 0.340078642  | 6.499341911  | 3.06E-10 | 8.39E-09 no |
| VAMP3        | 0.339877931  | 6.495004909  | 3.14E-10 | 8.59E-09 no |
| LOC286442    | 0.339872941  | 6.4948971    | 3.14E-10 | 8.59E-09 no |
| LPCAT2       | 0.339691458  | 6.490976488  | 3.21E-10 | 8.78E-09 no |
| CALHM2       | 0.33942662   | 6.485256577  | 3.32E-10 | 9.07E-09 no |
| FBP1         | 0.339358976  | 6.483795915  | 3.35E-10 | 9.13E-09 no |
| LRRC8C       | 0.339126128  | 6.478768754  | 3.45E-10 | 9.38E-09 no |
| PRDM11       | -0.339125373 | -6.478752465 | 3.45E-10 | 9.38E-09 no |
| TMOD3        | 0.339121631  | 6.478671685  | 3.45E-10 | 9.38E-09 no |
| FSD1         | -0.339024642 | -6.476578111 | 3.49E-10 | 9.48E-09 no |
| FXD5         | 0.33893546   | 6.474653264  | 3.53E-10 | 9.58E-09 no |
| PRICKLE3     | 0.338506623  | 6.465400296  | 3.73E-10 | 1.01E-08 no |
| APOBEC3D     | 0.337543857  | 6.444643346  | 4.21E-10 | 1.14E-08 no |
| RNPEP        | 0.337194977  | 6.437127239  | 4.40E-10 | 1.19E-08 no |
| LOC100506548 | -0.337187254 | -6.436960892 | 4.40E-10 | 1.19E-08 no |
| PDZD4        | -0.33698601  | -6.432626794 | 4.52E-10 | 1.22E-08 no |
| EVA1C        | 0.336941373  | 6.431665585  | 4.54E-10 | 1.22E-08 no |
| KCNK13       | 0.336564672  | 6.423555826  | 4.76E-10 | 1.28E-08 no |
| LOC100128420 | 0.336407109  | 6.42016478   | 4.86E-10 | 1.30E-08 no |
| FAM214B      | 0.336290104  | 6.417647017  | 4.93E-10 | 1.32E-08 no |
| LILRB1       | 0.336280216  | 6.417434258  | 4.94E-10 | 1.32E-08 no |
| KDELC2       | 0.336205735  | 6.415831721  | 4.98E-10 | 1.33E-08 no |
| ARID5A       | 0.336203628  | 6.415786398  | 4.98E-10 | 1.33E-08 no |
| HP           | 0.336075224  | 6.413023993  | 5.06E-10 | 1.35E-08 no |
| CP           | 0.335737666  | 6.405763905  | 5.28E-10 | 1.41E-08 no |
| NUDT16P1     | 0.335715461  | 6.405286425  | 5.30E-10 | 1.41E-08 no |
| VSIG4        | 0.335666583  | 6.404235424  | 5.33E-10 | 1.42E-08 no |
| CHSY1        | 0.335601446  | 6.402834918  | 5.37E-10 | 1.43E-08 no |
| C5orf20      | 0.335535556  | 6.401418319  | 5.42E-10 | 1.44E-08 no |
| TMEM145      | -0.33544732  | -6.399521473 | 5.48E-10 | 1.45E-08 no |
| CCDC88B      | 0.335055606  | 6.391102878  | 5.75E-10 | 1.52E-08 no |
| SMPDL3A      | 0.335038446  | 6.39073416   | 5.76E-10 | 1.52E-08 no |
| XCL2         | 0.334682219  | 6.383081622  | 6.03E-10 | 1.59E-08 no |

|              |              |              |          |             |
|--------------|--------------|--------------|----------|-------------|
| PABPC4       | 0.33449838   | 6.379133577  | 6.17E-10 | 1.62E-08 no |
| PHF11        | 0.334436815  | 6.37781162   | 6.21E-10 | 1.63E-08 no |
| SSR3         | 0.334427693  | 6.377615746  | 6.22E-10 | 1.63E-08 no |
| SOBP         | -0.334391087 | -6.376829779 | 6.25E-10 | 1.64E-08 no |
| ZNF101       | 0.334299418  | 6.374861668  | 6.32E-10 | 1.66E-08 no |
| STAT2        | 0.334228161  | 6.373331932  | 6.38E-10 | 1.67E-08 no |
| MBD2         | 0.334142619  | 6.371495721  | 6.45E-10 | 1.69E-08 no |
| CEBPD        | 0.333841955  | 6.365043129  | 6.69E-10 | 1.75E-08 no |
| LYL1         | 0.33376531   | 6.363398582  | 6.75E-10 | 1.76E-08 no |
| SAMD9        | 0.333732025  | 6.362684455  | 6.78E-10 | 1.77E-08 no |
| MTMR9        | -0.333463068 | -6.356914905 | 7.01E-10 | 1.82E-08 no |
| NLGN2        | -0.3333618   | -6.354742996 | 7.10E-10 | 1.85E-08 no |
| RGS2         | 0.333108736  | 6.349316586  | 7.33E-10 | 1.90E-08 no |
| KCNJ8        | 0.333042309  | 6.347892469  | 7.39E-10 | 1.92E-08 no |
| PLAUR        | 0.332939048  | 6.34567887   | 7.48E-10 | 1.94E-08 no |
| TRADD        | 0.332900229  | 6.344846766  | 7.52E-10 | 1.94E-08 no |
| TNFSF14      | 0.33289948   | 6.344830719  | 7.52E-10 | 1.94E-08 no |
| RHBDF2       | 0.332848946  | 6.34374756   | 7.57E-10 | 1.95E-08 no |
| ITGB2-AS1    | 0.332776473  | 6.342194274  | 7.64E-10 | 1.97E-08 no |
| RAP2B        | 0.332732219  | 6.341245859  | 7.68E-10 | 1.98E-08 no |
| TTC38        | 0.332712845  | 6.340830662  | 7.70E-10 | 1.98E-08 no |
| BCL10        | 0.332534999  | 6.337019756  | 7.87E-10 | 2.02E-08 no |
| HECTD4       | -0.332475667 | -6.33574856  | 7.92E-10 | 2.03E-08 no |
| TMEM194B     | 0.332423294  | 6.334626518  | 7.98E-10 | 2.04E-08 no |
| ERP29        | 0.332283982  | 6.331642226  | 8.11E-10 | 2.08E-08 no |
| THBD         | 0.332271968  | 6.33138488   | 8.13E-10 | 2.08E-08 no |
| SFRP4        | 0.332251408  | 6.330944504  | 8.15E-10 | 2.08E-08 no |
| DDB2         | 0.33197159   | 6.324951989  | 8.43E-10 | 2.15E-08 no |
| MAP2K3       | 0.331959521  | 6.324693548  | 8.45E-10 | 2.15E-08 no |
| HLA-DQA2     | 0.331945657  | 6.324396701  | 8.46E-10 | 2.15E-08 no |
| CRHR1-IT1    | -0.331804923 | -6.321383564 | 8.61E-10 | 2.19E-08 no |
| IL10         | 0.331767301  | 6.320578155  | 8.65E-10 | 2.19E-08 no |
| FGD2         | 0.331702062  | 6.319181603  | 8.72E-10 | 2.21E-08 no |
| FRRS1        | 0.331641459  | 6.317884374  | 8.78E-10 | 2.22E-08 no |
| HLA-DRB5     | 0.331537474  | 6.315658744  | 8.90E-10 | 2.25E-08 no |
| SOCS7        | -0.331408363 | -6.312895707 | 9.04E-10 | 2.28E-08 no |
| TREM2        | 0.331197023  | 6.308373788  | 9.28E-10 | 2.34E-08 no |
| FOSL2        | 0.330976318  | 6.30365261   | 9.53E-10 | 2.40E-08 no |
| GPR77        | 0.330942002  | 6.302918665  | 9.57E-10 | 2.41E-08 no |
| ORMDL2       | 0.330853821  | 6.301032757  | 9.68E-10 | 2.43E-08 no |
| UGCG         | 0.330653022  | 6.296738995  | 9.92E-10 | 2.49E-08 no |
| HSD3B7       | 0.330342763  | 6.290106513  | 1.03E-09 | 2.58E-08 no |
| DNASE1L1     | 0.330295811  | 6.289103005  | 1.04E-09 | 2.60E-08 no |
| C22orf39     | -0.330268596 | -6.288521359 | 1.04E-09 | 2.60E-08 no |
| LOC100506385 | 0.330261215  | 6.288363608  | 1.04E-09 | 2.60E-08 no |
| GLT25D1      | 0.330102086  | 6.284963067  | 1.06E-09 | 2.65E-08 no |
| SS18L1       | -0.329789961 | -6.278294779 | 1.10E-09 | 2.75E-08 no |
| TMEM255B     | 0.329688851  | 6.276135145  | 1.12E-09 | 2.78E-08 no |
| ADORA3       | 0.329462555  | 6.27130252   | 1.15E-09 | 2.85E-08 no |
| MAST1        | -0.329360721 | -6.269128216 | 1.16E-09 | 2.89E-08 no |
| OAS3         | 0.329228893  | 6.26631384   | 1.18E-09 | 2.93E-08 no |

|              |               |               |           |              |
|--------------|---------------|---------------|-----------|--------------|
| ELF1         | 0. 329110375  | 6. 263783983  | 1. 20E-09 | 2. 97E-08 no |
| DTX2         | 0. 329001037  | 6. 261450386  | 1. 21E-09 | 3. 01E-08 no |
| FCRL1        | 0. 328985099  | 6. 261110237  | 1. 22E-09 | 3. 01E-08 no |
| IL6R         | 0. 328922912  | 6. 259783121  | 1. 23E-09 | 3. 03E-08 no |
| LAG3         | 0. 328607302  | 6. 253049204  | 1. 27E-09 | 3. 14E-08 no |
| RNASE3       | 0. 328260314  | 6. 245648513  | 1. 33E-09 | 3. 28E-08 no |
| HMGCL        | 0. 327910149  | 6. 238182936  | 1. 39E-09 | 3. 41E-08 no |
| PDIA5        | 0. 327541707  | 6. 230330786  | 1. 45E-09 | 3. 57E-08 no |
| FAH          | 0. 32749405   | 6. 229315374  | 1. 46E-09 | 3. 58E-08 no |
| MEI1         | 0. 327426944  | 6. 227885629  | 1. 47E-09 | 3. 61E-08 no |
| OAS1         | 0. 327253876  | 6. 224198825  | 1. 50E-09 | 3. 68E-08 no |
| COL8A2       | 0. 327109866  | 6. 221131558  | 1. 53E-09 | 3. 74E-08 no |
| PARP10       | 0. 326944689  | 6. 217614057  | 1. 56E-09 | 3. 81E-08 no |
| OSTC         | 0. 326659632  | 6. 211545152  | 1. 61E-09 | 3. 94E-08 no |
| ATP6V1G3     | 0. 326612495  | 6. 210541788  | 1. 62E-09 | 3. 96E-08 no |
| KCNE3        | 0. 326581232  | 6. 209876348  | 1. 63E-09 | 3. 97E-08 no |
| HERC5        | 0. 326490942  | 6. 207954615  | 1. 65E-09 | 4. 01E-08 no |
| LOC100272216 | 0. 326288062  | 6. 203637232  | 1. 69E-09 | 4. 10E-08 no |
| CFH          | 0. 326250912  | 6. 202846765  | 1. 70E-09 | 4. 12E-08 no |
| ZBTB7B       | 0. 326230391  | 6. 202410131  | 1. 70E-09 | 4. 12E-08 no |
| MVP          | 0. 325985481  | 6. 19719994   | 1. 75E-09 | 4. 24E-08 no |
| APOL1        | 0. 325836822  | 6. 194038069  | 1. 78E-09 | 4. 31E-08 no |
| ELL2         | 0. 324866018  | 6. 173402337  | 2. 00E-09 | 4. 84E-08 no |
| TNFRSF10C    | 0. 32479732   | 6. 171942902  | 2. 02E-09 | 4. 88E-08 no |
| DNAJC3       | 0. 32468357   | 6. 169526595  | 2. 05E-09 | 4. 94E-08 no |
| KYNU         | 0. 32464575   | 6. 168723287  | 2. 06E-09 | 4. 96E-08 no |
| L2HGDH       | -0. 324430529 | -6. 164152529 | 2. 11E-09 | 5. 08E-08 no |
| NME8         | 0. 324424436  | 6. 164023153  | 2. 11E-09 | 5. 08E-08 no |
| TRPM2        | 0. 324340005  | 6. 16223034   | 2. 13E-09 | 5. 13E-08 no |
| C21orf88     | 0. 324131656  | 6. 157806987  | 2. 19E-09 | 5. 25E-08 no |
| C1orf140     | 0. 324015486  | 6. 155341078  | 2. 22E-09 | 5. 32E-08 no |
| SLC50A1      | 0. 323900001  | 6. 152890007  | 2. 25E-09 | 5. 39E-08 no |
| MYOF         | 0. 323711145  | 6. 148882381  | 2. 30E-09 | 5. 50E-08 no |
| DUSP23       | 0. 32370404   | 6. 14873162   | 2. 30E-09 | 5. 50E-08 no |
| TRPC2        | 0. 323591499  | 6. 146343849  | 2. 33E-09 | 5. 57E-08 no |
| ACRBP        | 0. 32330887   | 6. 140348585  | 2. 42E-09 | 5. 75E-08 no |
| CHRN2        | -0. 323180503 | -6. 137626229 | 2. 45E-09 | 5. 84E-08 no |
| LAPTM4A      | 0. 323107602  | 6. 136080328  | 2. 47E-09 | 5. 88E-08 no |
| SOWAHD       | 0. 323070498  | 6. 135293563  | 2. 48E-09 | 5. 90E-08 no |
| FMO4         | 0. 322711423  | 6. 127681324  | 2. 59E-09 | 6. 15E-08 no |
| RASL10B      | -0. 32262802  | -6. 125913653 | 2. 62E-09 | 6. 21E-08 no |
| ITGAD        | 0. 322543857  | 6. 124130012  | 2. 65E-09 | 6. 26E-08 no |
| CCDC85C      | -0. 322419513 | -6. 121495147 | 2. 69E-09 | 6. 35E-08 no |
| LRRC33       | 0. 322281026  | 6. 118560992  | 2. 73E-09 | 6. 45E-08 no |
| SPIRE2       | -0. 322098922 | -6. 114703378 | 2. 79E-09 | 6. 58E-08 no |
| RUNDC3A      | -0. 322027967 | -6. 113200512 | 2. 81E-09 | 6. 63E-08 no |
| APOBR        | 0. 322008047  | 6. 112778616  | 2. 82E-09 | 6. 64E-08 no |
| COPZ2        | 0. 321404818  | 6. 100006731  | 3. 03E-09 | 7. 12E-08 no |
| ZNF385A      | 0. 321341774  | 6. 09867243   | 3. 05E-09 | 7. 17E-08 no |
| NCOA7        | 0. 321163036  | 6. 094889948  | 3. 12E-09 | 7. 32E-08 no |
| FBLN2        | 0. 321147969  | 6. 094571125  | 3. 12E-09 | 7. 32E-08 no |

|              |              |              |          |             |
|--------------|--------------|--------------|----------|-------------|
| CD244        | 0.320948808  | 6.090357376  | 3.20E-09 | 7.49E-08 no |
| FAIM3        | 0.320845375  | 6.088169344  | 3.24E-09 | 7.57E-08 no |
| SERPINB6     | 0.320799109  | 6.087190697  | 3.26E-09 | 7.61E-08 no |
| ZFP36L2      | 0.320770201  | 6.086579242  | 3.27E-09 | 7.62E-08 no |
| DYRK4        | 0.320638679  | 6.083797602  | 3.32E-09 | 7.73E-08 no |
| CYLD         | 0.320630471  | 6.083624004  | 3.32E-09 | 7.73E-08 no |
| RSAD2        | 0.320372231  | 6.078163494  | 3.42E-09 | 7.97E-08 no |
| RNASE4       | 0.320357849  | 6.077859427  | 3.43E-09 | 7.97E-08 no |
| ARNT2        | -0.320154006 | -6.07355028  | 3.51E-09 | 8.16E-08 no |
| CLEC4A       | 0.319927192  | 6.068756637  | 3.61E-09 | 8.37E-08 no |
| ZFP36        | 0.319903284  | 6.068251414  | 3.62E-09 | 8.38E-08 no |
| LOC100132273 | -0.319789598 | -6.065849199 | 3.67E-09 | 8.49E-08 no |
| PGM2         | 0.319535312  | 6.06047712   | 3.78E-09 | 8.74E-08 no |
| IKBIP        | 0.319317666  | 6.055880249  | 3.88E-09 | 8.95E-08 no |
| ABI3         | 0.319064098  | 6.050526039  | 4.00E-09 | 9.21E-08 no |
| FSTL1        | 0.319043165  | 6.05008409   | 4.01E-09 | 9.23E-08 no |
| TAPBPL       | 0.318849093  | 6.045987224  | 4.10E-09 | 9.43E-08 no |
| SFT2D2       | 0.318640249  | 6.041579472  | 4.20E-09 | 9.65E-08 no |
| CHCHD6       | -0.31853702  | -6.039401134 | 4.25E-09 | 9.76E-08 no |
| DAP          | 0.318430511  | 6.037153839  | 4.31E-09 | 9.87E-08 no |
| CLIC1        | 0.318307244  | 6.03455327   | 4.37E-09 | 1.00E-07 no |
| ANXA2        | 0.318255143  | 6.033454194  | 4.39E-09 | 1.01E-07 no |
| FAM105A      | 0.318060587  | 6.02935054   | 4.50E-09 | 1.03E-07 no |
| TMEM140      | 0.317977019  | 6.027588166  | 4.54E-09 | 1.04E-07 no |
| BMP2K        | 0.317889612  | 6.025744995  | 4.59E-09 | 1.05E-07 no |
| RNF130       | 0.317854625  | 6.02500726   | 4.61E-09 | 1.05E-07 no |
| MYH9         | 0.317810649  | 6.024080017  | 4.63E-09 | 1.05E-07 no |
| ACCS         | 0.317760009  | 6.023012323  | 4.66E-09 | 1.06E-07 no |
| NCF1C        | 0.317625614  | 6.020179019  | 4.73E-09 | 1.07E-07 no |
| SQSTM1       | 0.317571754  | 6.019043666  | 4.76E-09 | 1.08E-07 no |
| GBP1P1       | 0.317504512  | 6.017626314  | 4.80E-09 | 1.09E-07 no |
| LOC646719    | -0.317144143 | -6.010031995 | 5.01E-09 | 1.13E-07 no |
| ARF6         | 0.316980454  | 6.006583431  | 5.10E-09 | 1.15E-07 no |
| LRP10        | 0.316931269  | 6.005547321  | 5.13E-09 | 1.16E-07 no |
| LILRA6       | 0.316855605  | 6.003953538  | 5.18E-09 | 1.17E-07 no |
| OSM          | 0.316794341  | 6.002663149  | 5.21E-09 | 1.18E-07 no |
| CSNK1D       | 0.316771353  | 6.002178981  | 5.23E-09 | 1.18E-07 no |
| KHNYN        | 0.316743832  | 6.001599364  | 5.24E-09 | 1.18E-07 no |
| FAM114A1     | 0.316708482  | 6.000854883  | 5.27E-09 | 1.18E-07 no |
| CEACAM4      | 0.316633518  | 5.999276205  | 5.31E-09 | 1.19E-07 no |
| CXCR3        | 0.316498445  | 5.996432005  | 5.40E-09 | 1.21E-07 no |
| ANKRD22      | 0.3164956    | 5.996372097  | 5.40E-09 | 1.21E-07 no |
| ABRACL       | 0.316394426  | 5.994241978  | 5.46E-09 | 1.22E-07 no |
| TMEM87B      | 0.316171821  | 5.989556013  | 5.61E-09 | 1.25E-07 no |
| CD1C         | 0.31616502   | 5.989412864  | 5.61E-09 | 1.25E-07 no |
| ADORA2A      | 0.316117613  | 5.988415082  | 5.64E-09 | 1.26E-07 no |
| VSTM1        | 0.316039386  | 5.986768723  | 5.69E-09 | 1.27E-07 no |
| RUFY3        | -0.316039204 | -5.986764892 | 5.69E-09 | 1.27E-07 no |
| PI4K2A       | 0.315953527  | 5.984961879  | 5.75E-09 | 1.28E-07 no |
| APEX2        | 0.315937004  | 5.98461418   | 5.76E-09 | 1.28E-07 no |
| DCBLD2       | 0.315843168  | 5.982639707  | 5.83E-09 | 1.29E-07 no |

|           |              |              |          |          |    |
|-----------|--------------|--------------|----------|----------|----|
| DERL3     | 0.315841616  | 5.982607046  | 5.83E-09 | 1.29E-07 | no |
| CELSR3    | -0.315744491 | -5.980563582 | 5.89E-09 | 1.31E-07 | no |
| ABCD1     | 0.315735689  | 5.980378401  | 5.90E-09 | 1.31E-07 | no |
| ANXA4     | 0.315549283  | 5.976457097  | 6.03E-09 | 1.33E-07 | no |
| STAT3     | 0.315515971  | 5.975756409  | 6.05E-09 | 1.34E-07 | no |
| MACC1     | 0.315497403  | 5.975365882  | 6.06E-09 | 1.34E-07 | no |
| PHLPP1    | -0.315492474 | -5.975262196 | 6.07E-09 | 1.34E-07 | no |
| GNG5      | 0.31532243   | 5.971685988  | 6.19E-09 | 1.36E-07 | no |
| BTLA      | 0.31528947   | 5.970992878  | 6.21E-09 | 1.37E-07 | no |
| MCMDC2    | -0.315178054 | -5.968650099 | 6.29E-09 | 1.38E-07 | no |
| TBC1D22A  | 0.315130174  | 5.967643383  | 6.33E-09 | 1.39E-07 | no |
| LINC00619 | 0.315014773  | 5.965217234  | 6.41E-09 | 1.41E-07 | no |
| C16orf45  | -0.314979718 | -5.964480294 | 6.44E-09 | 1.41E-07 | no |
| CRISPLD2  | 0.314867274  | 5.962116686  | 6.52E-09 | 1.43E-07 | no |
| REL       | 0.31457364   | 5.955945674  | 6.75E-09 | 1.48E-07 | no |
| IRF2      | 0.314540582  | 5.955251043  | 6.78E-09 | 1.48E-07 | no |
| NLRC4     | 0.314516841  | 5.954752199  | 6.79E-09 | 1.48E-07 | no |
| CA13      | 0.314481631  | 5.954012405  | 6.82E-09 | 1.49E-07 | no |
| SPP1      | 0.31434489   | 5.951139593  | 6.93E-09 | 1.51E-07 | no |
| DPAGT1    | 0.314212065  | 5.948349438  | 7.04E-09 | 1.53E-07 | no |
| VAMP5     | 0.313726769  | 5.938158471  | 7.44E-09 | 1.62E-07 | no |
| KIF3A     | -0.313706734 | -5.93773786  | 7.46E-09 | 1.62E-07 | no |
| GPSM1     | -0.313395901 | -5.931213393 | 7.73E-09 | 1.68E-07 | no |
| NAGK      | 0.313344506  | 5.930134789  | 7.78E-09 | 1.69E-07 | no |
| NRXN1     | -0.313300555 | -5.929212479 | 7.82E-09 | 1.69E-07 | no |
| DDX58     | 0.313293934  | 5.929073528  | 7.83E-09 | 1.69E-07 | no |
| CEP68     | -0.313079626 | -5.92457684  | 8.02E-09 | 1.73E-07 | no |
| ADAMTS12  | 0.313015997  | 5.923241956  | 8.08E-09 | 1.74E-07 | no |
| SPIB      | 0.312989397  | 5.922683936  | 8.10E-09 | 1.75E-07 | no |
| PLB1      | 0.312839974  | 5.919549592  | 8.24E-09 | 1.78E-07 | no |
| USB1      | 0.312813965  | 5.919004067  | 8.27E-09 | 1.78E-07 | no |
| ACOT9     | 0.312642619  | 5.915410543  | 8.43E-09 | 1.81E-07 | no |
| HPGDS     | 0.312613876  | 5.914807793  | 8.46E-09 | 1.82E-07 | no |
| TWF2      | 0.312561073  | 5.913700562  | 8.51E-09 | 1.83E-07 | no |
| FPGT      | 0.312517322  | 5.912783179  | 8.56E-09 | 1.83E-07 | no |
| ATP9A     | -0.312379961 | -5.909903244 | 8.69E-09 | 1.86E-07 | no |
| AIDA      | 0.312289109  | 5.907998647  | 8.78E-09 | 1.88E-07 | no |
| PNMA1     | -0.312237975 | -5.906926754 | 8.84E-09 | 1.89E-07 | no |
| AAED1     | 0.312235436  | 5.90687354   | 8.84E-09 | 1.89E-07 | no |
| ZDHHC12   | 0.31216524   | 5.905402179  | 8.91E-09 | 1.90E-07 | no |
| LOC730102 | 0.312165105  | 5.905399347  | 8.91E-09 | 1.90E-07 | no |
| CPA3      | 0.312092914  | 5.903886268  | 8.98E-09 | 1.91E-07 | no |
| CD164     | 0.31207962   | 5.903607641  | 9.00E-09 | 1.91E-07 | no |
| LOXL3     | 0.311950578  | 5.900903337  | 9.13E-09 | 1.94E-07 | no |
| PLEKHA4   | 0.311928073  | 5.900431748  | 9.16E-09 | 1.94E-07 | no |
| C14orf132 | -0.311902918 | -5.89990463  | 9.18E-09 | 1.95E-07 | no |
| PFN1      | 0.311687384  | 5.895388761  | 9.41E-09 | 1.99E-07 | no |
| MACROD1   | -0.311417901 | -5.889743969 | 9.71E-09 | 2.05E-07 | no |
| MAF       | 0.31131997   | 5.887693028  | 9.82E-09 | 2.07E-07 | no |
| RALGPS1   | -0.311205073 | -5.885287029 | 9.95E-09 | 2.10E-07 | no |
| HOXB-AS3  | 0.311183252  | 5.884830117  | 9.97E-09 | 2.10E-07 | no |

|              |              |              |          |             |
|--------------|--------------|--------------|----------|-------------|
| AXL          | 0.311069615  | 5.88245085   | 1.01E-08 | 2.13E-07 no |
| LILRB3       | 0.311054213  | 5.882128391  | 1.01E-08 | 2.13E-07 no |
| CACNA2D4     | 0.310936402  | 5.879662054  | 1.03E-08 | 2.16E-07 no |
| CDK5R1       | -0.310772119 | -5.876223343 | 1.04E-08 | 2.20E-07 no |
| CYBRD1       | 0.310666457  | 5.874011967  | 1.06E-08 | 2.22E-07 no |
| SVIL         | 0.31065477   | 5.873767397  | 1.06E-08 | 2.22E-07 no |
| HLX          | 0.310527694  | 5.871108213  | 1.07E-08 | 2.25E-07 no |
| EPHA2        | 0.310467433  | 5.869847304  | 1.08E-08 | 2.26E-07 no |
| FAM26E       | 0.310423334  | 5.868924631  | 1.09E-08 | 2.27E-07 no |
| IL21R        | 0.310373858  | 5.867889509  | 1.09E-08 | 2.28E-07 no |
| OR2A9P       | 0.310314373  | 5.866645037  | 1.10E-08 | 2.30E-07 no |
| DPY19L1      | 0.310313832  | 5.86663373   | 1.10E-08 | 2.30E-07 no |
| PSTPIP2      | 0.310230712  | 5.864894931  | 1.11E-08 | 2.31E-07 no |
| SUSD1        | 0.310191784  | 5.86408065   | 1.12E-08 | 2.32E-07 no |
| PLEKH02      | 0.309677226  | 5.853320303  | 1.18E-08 | 2.46E-07 no |
| TNFAIP8      | 0.309638785  | 5.852516676  | 1.19E-08 | 2.47E-07 no |
| DPEP2        | 0.309504934  | 5.84971864   | 1.21E-08 | 2.50E-07 no |
| ANKRD13B     | -0.309491977 | -5.84944781  | 1.21E-08 | 2.51E-07 no |
| TAB1         | -0.309287419 | -5.84517254  | 1.24E-08 | 2.56E-07 no |
| CREM         | 0.309262124  | 5.844643922  | 1.24E-08 | 2.57E-07 no |
| PRF1         | 0.309198799  | 5.843320645  | 1.25E-08 | 2.58E-07 no |
| CKB          | -0.309023474 | -5.839657378 | 1.27E-08 | 2.63E-07 no |
| USP11        | -0.308955236 | -5.838231779 | 1.28E-08 | 2.65E-07 no |
| GALNT12      | 0.308929823  | 5.837700895  | 1.29E-08 | 2.66E-07 no |
| FLJ42627     | -0.308630751 | -5.831454158 | 1.33E-08 | 2.74E-07 no |
| KLHL25       | -0.308569649 | -5.830178156 | 1.34E-08 | 2.76E-07 no |
| CLEC17A      | 0.308543347  | 5.829628922  | 1.35E-08 | 2.77E-07 no |
| SLC02B1      | 0.308530704  | 5.829364908  | 1.35E-08 | 2.77E-07 no |
| RINL         | 0.308472014  | 5.828139389  | 1.36E-08 | 2.78E-07 no |
| YY2          | 0.308217376  | 5.822823123  | 1.40E-08 | 2.86E-07 no |
| BDKRB2       | 0.308204207  | 5.822548228  | 1.40E-08 | 2.86E-07 no |
| EPB41L4A-AS1 | -0.308186833 | -5.822185565 | 1.40E-08 | 2.87E-07 no |
| FAM109B      | 0.30810628   | 5.820504141  | 1.41E-08 | 2.89E-07 no |
| SLC2A10      | 0.30801359   | 5.818569535  | 1.43E-08 | 2.92E-07 no |
| VRK2         | 0.307549189  | 5.808879474  | 1.51E-08 | 3.07E-07 no |
| CLIC3        | 0.307423217  | 5.806251756  | 1.53E-08 | 3.11E-07 no |
| VEGFC        | 0.307345952  | 5.804640216  | 1.54E-08 | 3.14E-07 no |
| CIRBP        | -0.30728907  | -5.803453897 | 1.55E-08 | 3.15E-07 no |
| ARL3         | -0.307225308 | -5.80212417  | 1.56E-08 | 3.17E-07 no |
| PTRF         | 0.307056525  | 5.798604683  | 1.59E-08 | 3.23E-07 no |
| ADCY7        | 0.307033767  | 5.798130183  | 1.60E-08 | 3.24E-07 no |
| OLR1         | 0.306925973  | 5.795882823  | 1.62E-08 | 3.27E-07 no |
| CD47         | 0.306809909  | 5.793463307  | 1.64E-08 | 3.31E-07 no |
| AKNA         | 0.306723685  | 5.791666042  | 1.65E-08 | 3.34E-07 no |
| NDRG2        | -0.306661518 | -5.79037032  | 1.66E-08 | 3.36E-07 no |
| ESYT1        | 0.306635546  | 5.789829014  | 1.67E-08 | 3.37E-07 no |
| SLC25A24     | 0.306598104  | 5.789048673  | 1.68E-08 | 3.38E-07 no |
| HSPA7        | 0.306414294  | 5.785218326  | 1.71E-08 | 3.45E-07 no |
| CTSL1        | 0.306297381  | 5.782782382  | 1.73E-08 | 3.49E-07 no |
| TMED7-TICAM2 | 0.306212812  | 5.781020517  | 1.75E-08 | 3.52E-07 no |
| TAB2         | 0.306102226  | 5.778716877  | 1.77E-08 | 3.56E-07 no |

|           |              |              |          |          |    |
|-----------|--------------|--------------|----------|----------|----|
| CASC3     | -0.305811967 | -5.772671622 | 1.83E-08 | 3.67E-07 | no |
| HMOX1     | 0.305374795  | 5.763569958  | 1.92E-08 | 3.86E-07 | no |
| DUSP26    | -0.305325479 | -5.762543475 | 1.93E-08 | 3.87E-07 | no |
| LPAR6     | 0.305235628  | 5.760673436  | 1.95E-08 | 3.91E-07 | no |
| RPAIN     | -0.305102867 | -5.757910607 | 1.98E-08 | 3.96E-07 | no |
| TMEM178B  | -0.304996069 | -5.755688353 | 2.01E-08 | 4.01E-07 | no |
| DNAJC22   | 0.304744964  | 5.750464305  | 2.06E-08 | 4.12E-07 | no |
| PALMD     | 0.304712864  | 5.749796592  | 2.07E-08 | 4.13E-07 | no |
| MIR22HG   | 0.304652294  | 5.748536718  | 2.08E-08 | 4.15E-07 | no |
| SEPHS2    | 0.304649272  | 5.74847387   | 2.09E-08 | 4.15E-07 | no |
| COTL1     | 0.304620881  | 5.747883346  | 2.09E-08 | 4.16E-07 | no |
| SLIT1     | -0.304610313 | -5.747663547 | 2.09E-08 | 4.16E-07 | no |
| SLC35F6   | 0.304517537  | 5.745734008  | 2.12E-08 | 4.20E-07 | no |
| BNIP2     | 0.304483724  | 5.745030816  | 2.12E-08 | 4.21E-07 | no |
| ERP44     | 0.304451252  | 5.744355542  | 2.13E-08 | 4.22E-07 | no |
| IL18RAP   | 0.304324248  | 5.74171461   | 2.16E-08 | 4.28E-07 | no |
| SLC25A39  | 0.304256786  | 5.740311929  | 2.18E-08 | 4.31E-07 | no |
| IRAK1     | 0.304174179  | 5.738594492  | 2.20E-08 | 4.34E-07 | no |
| ADAM12    | 0.30408037   | 5.736644318  | 2.22E-08 | 4.38E-07 | no |
| HIST1H2BK | 0.303885995  | 5.732604104  | 2.27E-08 | 4.48E-07 | no |
| TC2N      | 0.303848797  | 5.731831015  | 2.28E-08 | 4.49E-07 | no |
| TNFRSF17  | 0.303686418  | 5.728456597  | 2.32E-08 | 4.57E-07 | no |
| IGFBP7    | 0.303501846  | 5.724621643  | 2.37E-08 | 4.66E-07 | no |
| CHI3L2    | 0.303479725  | 5.724162066  | 2.38E-08 | 4.67E-07 | no |
| FCRL6     | 0.303333786  | 5.721130379  | 2.41E-08 | 4.74E-07 | no |
| ZNF552    | 0.303291982  | 5.720262046  | 2.43E-08 | 4.76E-07 | no |
| SRPR      | 0.303203666  | 5.718427694  | 2.45E-08 | 4.80E-07 | no |
| BLVRB     | 0.30320004   | 5.718352385  | 2.45E-08 | 4.80E-07 | no |
| FAM167B   | 0.303152727  | 5.717369749  | 2.46E-08 | 4.82E-07 | no |
| IFI27     | 0.30311665   | 5.716620511  | 2.47E-08 | 4.83E-07 | no |
| HLA-DRB4  | 0.30310224   | 5.716321243  | 2.48E-08 | 4.83E-07 | no |
| TOM1L1    | 0.303033469  | 5.714893106  | 2.50E-08 | 4.87E-07 | no |
| TMEM176B  | 0.303021698  | 5.714648671  | 2.50E-08 | 4.87E-07 | no |
| FAM115C   | 0.303004037  | 5.714281936  | 2.50E-08 | 4.87E-07 | no |
| LATS2     | 0.302781107  | 5.709653248  | 2.57E-08 | 4.99E-07 | no |
| MICAL3    | -0.302378249 | -5.701291345 | 2.68E-08 | 5.21E-07 | no |
| STEAP3    | 0.30219507   | 5.69749032   | 2.74E-08 | 5.32E-07 | no |
| ARAP1     | 0.302153894  | 5.696636004  | 2.75E-08 | 5.34E-07 | no |
| CYP27A1   | 0.302022003  | 5.693899745  | 2.79E-08 | 5.41E-07 | no |
| WIPI1     | 0.301792596  | 5.689141284  | 2.86E-08 | 5.54E-07 | no |
| MAGEH1    | -0.301686853 | -5.686948267 | 2.90E-08 | 5.60E-07 | no |
| TMEM170B  | -0.301457004 | -5.682182201 | 2.97E-08 | 5.74E-07 | no |
| ANXA1     | 0.301446057  | 5.681955247  | 2.97E-08 | 5.74E-07 | no |
| SIGLEC5   | 0.301409284  | 5.681192839  | 2.99E-08 | 5.76E-07 | no |
| NADK      | 0.301095672  | 5.674691971  | 3.09E-08 | 5.96E-07 | no |
| HDGFRP3   | -0.3010012   | -5.67273407  | 3.12E-08 | 6.02E-07 | no |
| IFNAR2    | 0.300963871  | 5.671960481  | 3.14E-08 | 6.04E-07 | no |
| MAP3K14   | 0.300923651  | 5.671127011  | 3.15E-08 | 6.06E-07 | no |
| TEX261    | 0.300290397  | 5.658008693  | 3.38E-08 | 6.49E-07 | no |
| HLA-DRB6  | 0.300273851  | 5.657666046  | 3.38E-08 | 6.49E-07 | no |
| MAGT1     | 0.300261544  | 5.65741119   | 3.39E-08 | 6.50E-07 | no |

|           |              |              |          |          |    |
|-----------|--------------|--------------|----------|----------|----|
| FAM96A    | 0.300254867  | 5.657272907  | 3.39E-08 | 6.50E-07 | no |
| TD02      | 0.300108304  | 5.654238032  | 3.45E-08 | 6.59E-07 | no |
| VNN1      | 0.300084077  | 5.653736401  | 3.46E-08 | 6.61E-07 | no |
| TAP1      | 0.300045649  | 5.652940768  | 3.47E-08 | 6.63E-07 | no |
| IMPA2     | 0.300029111  | 5.652598354  | 3.48E-08 | 6.63E-07 | no |
| SCIN      | 0.299973236  | 5.651441564  | 3.50E-08 | 6.67E-07 | no |
| DDX51     | -0.299956047 | -5.651085718 | 3.50E-08 | 6.67E-07 | no |
| KIAA0895L | -0.299955797 | -5.651080535 | 3.50E-08 | 6.67E-07 | no |
| MAP4K1    | 0.299811817  | 5.648100014  | 3.56E-08 | 6.77E-07 | no |
| GPR82     | 0.299757446  | 5.646974593  | 3.58E-08 | 6.80E-07 | no |
| ITPK1     | -0.299626529 | -5.644265003 | 3.63E-08 | 6.90E-07 | no |
| CXCR2P1   | 0.299599741  | 5.643710632  | 3.64E-08 | 6.91E-07 | no |
| PREB      | 0.299592114  | 5.643552783  | 3.65E-08 | 6.91E-07 | no |
| SERPINB1  | 0.299389386  | 5.639357762  | 3.73E-08 | 7.06E-07 | no |
| LINGO1    | -0.299356073 | -5.638668501 | 3.74E-08 | 7.08E-07 | no |
| TTF2      | 0.299310944  | 5.637734804  | 3.76E-08 | 7.11E-07 | no |
| REX02     | 0.29928671   | 5.637233412  | 3.77E-08 | 7.12E-07 | no |
| CNTFR     | -0.299205483 | -5.635553001 | 3.80E-08 | 7.18E-07 | no |
| PRAM1     | 0.299155836  | 5.634525979  | 3.82E-08 | 7.21E-07 | no |
| FUOM      | 0.298856497  | 5.628334749  | 3.95E-08 | 7.44E-07 | no |
| C6orf62   | 0.298665124  | 5.624377554  | 4.04E-08 | 7.59E-07 | no |
| NCF1B     | 0.29847998   | 5.620549852  | 4.12E-08 | 7.73E-07 | no |
| SLC29A1   | 0.298477401  | 5.620496536  | 4.12E-08 | 7.73E-07 | no |
| FHOD1     | 0.298476024  | 5.62046807   | 4.12E-08 | 7.73E-07 | no |
| IL27      | 0.298448793  | 5.619905164  | 4.13E-08 | 7.75E-07 | no |
| GPR84     | 0.298427464  | 5.619464247  | 4.14E-08 | 7.76E-07 | no |
| TET1      | -0.298306811 | -5.61697036  | 4.20E-08 | 7.85E-07 | no |
| SLAMF6    | 0.29804821   | 5.611626079  | 4.32E-08 | 8.07E-07 | no |
| DUSP1     | 0.297903051  | 5.60862679   | 4.38E-08 | 8.19E-07 | no |
| KLRF1     | 0.297854244  | 5.607618451  | 4.41E-08 | 8.23E-07 | no |
| TGFBR1    | 0.297819229  | 5.606895062  | 4.42E-08 | 8.25E-07 | no |
| RPRD1A    | -0.297796905 | -5.606433875 | 4.44E-08 | 8.27E-07 | no |
| ACAA2     | 0.297769818  | 5.605874309  | 4.45E-08 | 8.28E-07 | no |
| NAALADL1  | 0.297760275  | 5.605677172  | 4.45E-08 | 8.28E-07 | no |
| ARHGEF35  | 0.297754852  | 5.605565135  | 4.46E-08 | 8.28E-07 | no |
| PI4K2B    | 0.297744364  | 5.605348481  | 4.46E-08 | 8.29E-07 | no |
| CCR5      | 0.297593758  | 5.602237592  | 4.53E-08 | 8.41E-07 | no |
| LYRM7     | -0.297573966 | -5.601828813 | 4.54E-08 | 8.43E-07 | no |
| CCL2      | 0.297387331  | 5.597974431  | 4.64E-08 | 8.59E-07 | no |
| 37865     | -0.297380641 | -5.597836273 | 4.64E-08 | 8.59E-07 | no |
| RPN2      | 0.297357097  | 5.597350095  | 4.65E-08 | 8.60E-07 | no |
| FCGBP     | 0.297224258  | 5.594607213  | 4.72E-08 | 8.72E-07 | no |
| DDX25     | -0.297214266 | -5.59440091  | 4.72E-08 | 8.72E-07 | no |
| PICALM    | 0.297179897  | 5.593691315  | 4.74E-08 | 8.75E-07 | no |
| MYEF2     | -0.296958478 | -5.589120403 | 4.86E-08 | 8.95E-07 | no |
| CD302     | 0.296800594  | 5.585861703  | 4.94E-08 | 9.10E-07 | no |
| RNLS      | 0.296788966  | 5.585621729  | 4.95E-08 | 9.10E-07 | no |
| LRRC16B   | -0.296763521 | -5.585096594 | 4.96E-08 | 9.12E-07 | no |
| NXF3      | 0.296633457  | 5.582412571  | 5.03E-08 | 9.24E-07 | no |
| DHX58     | 0.296499633  | 5.579651294  | 5.11E-08 | 9.37E-07 | no |
| CECR2     | -0.296474962 | -5.579142289 | 5.12E-08 | 9.39E-07 | no |



|              |              |              |          |             |
|--------------|--------------|--------------|----------|-------------|
| LSAMP        | -0.296402554 | -5.577648432 | 5.16E-08 | 9.45E-07 no |
| THBS1        | 0.296212536  | 5.573728674  | 5.27E-08 | 9.64E-07 no |
| PURG         | -0.296116855 | -5.571755203 | 5.32E-08 | 9.73E-07 no |
| FOLR2        | 0.295581302  | 5.560712547  | 5.64E-08 | 1.03E-06 no |
| ITGB4        | 0.295540524  | 5.559871972  | 5.66E-08 | 1.03E-06 no |
| SEC22B       | 0.295505241  | 5.559144709  | 5.68E-08 | 1.04E-06 no |
| RRAS         | 0.295474423  | 5.558509486  | 5.70E-08 | 1.04E-06 no |
| KBTBD7       | -0.29542583  | -5.557507914 | 5.73E-08 | 1.04E-06 no |
| EMP1         | 0.295353704  | 5.55602141   | 5.78E-08 | 1.05E-06 no |
| CAT          | 0.295342323  | 5.555786859  | 5.78E-08 | 1.05E-06 no |
| HTR7         | 0.295306176  | 5.555041925  | 5.81E-08 | 1.05E-06 no |
| UNC13A       | -0.295267736 | -5.554249754 | 5.83E-08 | 1.06E-06 no |
| HPS1         | 0.295079676  | 5.550374642  | 5.95E-08 | 1.08E-06 no |
| SCHIP1       | -0.295020618 | -5.549157869 | 5.99E-08 | 1.09E-06 no |
| OSTM1        | 0.294986522  | 5.548455412  | 6.01E-08 | 1.09E-06 no |
| KLHDC3       | -0.29485155  | -5.545674914 | 6.10E-08 | 1.10E-06 no |
| CNRIP1       | -0.294809003 | -5.544798505 | 6.13E-08 | 1.11E-06 no |
| BTBD19       | 0.294672528  | 5.541987535  | 6.22E-08 | 1.12E-06 no |
| RPS6KA4      | 0.294596714  | 5.540426153  | 6.27E-08 | 1.13E-06 no |
| LRRK1        | 0.294433306  | 5.537061177  | 6.38E-08 | 1.15E-06 no |
| CSTB         | 0.294339977  | 5.535139535  | 6.44E-08 | 1.16E-06 no |
| CYP4V2       | 0.294200937  | 5.532277027  | 6.54E-08 | 1.18E-06 no |
| RAB43        | 0.293989762  | 5.527930174  | 6.69E-08 | 1.20E-06 no |
| ZNF664-FAM10 | -0.293956267 | -5.527240786 | 6.71E-08 | 1.21E-06 no |
| ENTPD1       | 0.293843099  | 5.524911754  | 6.79E-08 | 1.22E-06 no |
| IER3         | 0.293766558  | 5.523336671  | 6.85E-08 | 1.23E-06 no |
| NAMPT        | 0.293367898  | 5.515134766  | 7.15E-08 | 1.28E-06 no |
| ZCCHC14      | -0.293252386 | -5.512758862 | 7.24E-08 | 1.30E-06 no |
| STX3         | 0.293234182  | 5.512384455  | 7.25E-08 | 1.30E-06 no |
| IFNGR1       | 0.293175883  | 5.51118544   | 7.30E-08 | 1.30E-06 no |
| FCER1A       | 0.293172142  | 5.511108514  | 7.30E-08 | 1.30E-06 no |
| GSTA4        | -0.293068808 | -5.508983469 | 7.38E-08 | 1.32E-06 no |
| GCSH         | -0.2929229   | -5.505983249 | 7.50E-08 | 1.34E-06 no |
| SLA          | 0.29261266   | 5.499605386  | 7.75E-08 | 1.38E-06 no |
| MIS18BP1     | 0.292430274  | 5.495856822  | 7.90E-08 | 1.41E-06 no |
| EPS8         | 0.292321735  | 5.493626333  | 7.99E-08 | 1.42E-06 no |
| CELF5        | -0.292146972 | -5.490035423 | 8.14E-08 | 1.45E-06 no |
| SMPD3        | -0.292119319 | -5.489467278 | 8.17E-08 | 1.45E-06 no |
| LOC100133445 | 0.291672794  | 5.480295364  | 8.56E-08 | 1.52E-06 no |
| SLC10A3      | 0.291667186  | 5.480180198  | 8.57E-08 | 1.52E-06 no |
| ACTL6B       | -0.291665323 | -5.480141944 | 8.57E-08 | 1.52E-06 no |
| NALCN        | -0.2916559   | -5.47994843  | 8.58E-08 | 1.52E-06 no |
| TNFRSF13B    | 0.291554713  | 5.477870547  | 8.67E-08 | 1.53E-06 no |
| PDP2         | -0.291284386 | -5.472320382 | 8.92E-08 | 1.58E-06 no |
| MMP11        | 0.291263562  | 5.471892913  | 8.94E-08 | 1.58E-06 no |
| MPZL2        | 0.291251518  | 5.471645662  | 8.96E-08 | 1.58E-06 no |
| BACE2        | 0.291170516  | 5.469982914  | 9.03E-08 | 1.59E-06 no |
| ITPRIPL2     | 0.291126074  | 5.469070706  | 9.08E-08 | 1.60E-06 no |
| PRR13        | 0.291105422  | 5.468646809  | 9.10E-08 | 1.60E-06 no |
| FHL3         | 0.291045817  | 5.467423445  | 9.15E-08 | 1.61E-06 no |
| SAA2         | 0.291037327  | 5.467249196  | 9.16E-08 | 1.61E-06 no |

|              |              |              |          |             |
|--------------|--------------|--------------|----------|-------------|
| HEG1         | 0.290899305  | 5.464416655  | 9.30E-08 | 1.63E-06 no |
| FGR          | 0.290852206  | 5.463450137  | 9.34E-08 | 1.64E-06 no |
| PRDX6        | 0.290703704  | 5.460403065  | 9.49E-08 | 1.66E-06 no |
| FASN         | -0.290679206 | -5.459900449 | 9.51E-08 | 1.67E-06 no |
| TSC22D1      | -0.29060655  | -5.458409822 | 9.59E-08 | 1.68E-06 no |
| GDF5         | 0.290509464  | 5.45641817   | 9.69E-08 | 1.69E-06 no |
| SYTL1        | 0.290455414  | 5.455309444  | 9.74E-08 | 1.70E-06 no |
| ZNF554       | -0.290414986 | -5.454480172 | 9.78E-08 | 1.71E-06 no |
| LRRC4        | -0.290228178 | -5.450648775 | 9.98E-08 | 1.74E-06 no |
| CAST         | 0.290159899  | 5.449248553  | 1.01E-07 | 1.75E-06 no |
| SIGLEC14     | 0.29015208   | 5.449088226  | 1.01E-07 | 1.75E-06 no |
| HEBP2        | 0.290145313  | 5.448949456  | 1.01E-07 | 1.75E-06 no |
| THAP10       | -0.290112805 | -5.448282831 | 1.01E-07 | 1.76E-06 no |
| LITAF        | 0.290102222  | 5.448065822  | 1.01E-07 | 1.76E-06 no |
| GGT5         | 0.290073291  | 5.447472593  | 1.01E-07 | 1.76E-06 no |
| BGN          | 0.289925792  | 5.444448344  | 1.03E-07 | 1.79E-06 no |
| PNRC1        | 0.289743635  | 5.440714049  | 1.05E-07 | 1.82E-06 no |
| PKD2         | 0.289713821  | 5.440102925  | 1.05E-07 | 1.82E-06 no |
| ZDHHC22      | -0.289568701 | -5.437128451 | 1.07E-07 | 1.85E-06 no |
| GLUD1P7      | -0.289546072 | -5.436664674 | 1.07E-07 | 1.85E-06 no |
| MMP14        | 0.289474533  | 5.43519856   | 1.08E-07 | 1.87E-06 no |
| UBE20        | -0.289362603 | -5.432904856 | 1.09E-07 | 1.89E-06 no |
| LOC100129794 | -0.289342081 | -5.432484339 | 1.10E-07 | 1.89E-06 no |
| BRMS1L       | -0.289240132 | -5.430395436 | 1.11E-07 | 1.91E-06 no |
| LOC257358    | 0.289162433  | 5.428803528  | 1.12E-07 | 1.92E-06 no |
| B3GNT8       | 0.289022236  | 5.425931477  | 1.13E-07 | 1.95E-06 no |
| GCNT1        | 0.288972442  | 5.424911473  | 1.14E-07 | 1.96E-06 no |
| PRRX1        | 0.288963639  | 5.424731177  | 1.14E-07 | 1.96E-06 no |
| GNL1         | -0.288962453 | -5.424706865 | 1.14E-07 | 1.96E-06 no |
| ATL3         | 0.288851845  | 5.422441365  | 1.15E-07 | 1.98E-06 no |
| GNAO1        | -0.288759126 | -5.420542449 | 1.16E-07 | 2.00E-06 no |
| CRY2         | -0.288653028 | -5.418369729 | 1.18E-07 | 2.02E-06 no |
| ALDOC        | -0.288469617 | -5.414614275 | 1.20E-07 | 2.05E-06 no |
| CD53         | 0.288404277  | 5.41327654   | 1.21E-07 | 2.07E-06 no |
| BNC2         | 0.288380369  | 5.412787083  | 1.21E-07 | 2.07E-06 no |
| SERP2        | -0.287955364 | -5.404088078 | 1.27E-07 | 2.16E-06 no |
| NEU1         | 0.287869693  | 5.402334984  | 1.28E-07 | 2.18E-06 no |
| LGALS2       | 0.28770368   | 5.39893824   | 1.30E-07 | 2.22E-06 no |
| SNX10        | 0.287667717  | 5.398202481  | 1.31E-07 | 2.22E-06 no |
| POU6F1       | -0.287641183 | -5.397659648 | 1.31E-07 | 2.23E-06 no |
| LINC00488    | 0.287526319  | 5.395309893  | 1.33E-07 | 2.25E-06 no |
| LOC115110    | 0.287397706  | 5.3926792    | 1.34E-07 | 2.28E-06 no |
| CPED1        | 0.2873939    | 5.392601338  | 1.34E-07 | 2.28E-06 no |
| MALT1        | 0.287370524  | 5.392123242  | 1.35E-07 | 2.29E-06 no |
| MORN4        | -0.287345903 | -5.391619686 | 1.35E-07 | 2.29E-06 no |
| C19orf66     | 0.287305242  | 5.390788084  | 1.36E-07 | 2.30E-06 no |
| LINC00641    | -0.287282623 | -5.390325492 | 1.36E-07 | 2.30E-06 no |
| CACNG2       | -0.287142863 | -5.387467453 | 1.38E-07 | 2.33E-06 no |
| RPS6KL1      | -0.287123674 | -5.387075073 | 1.38E-07 | 2.34E-06 no |
| ATP1B3       | 0.286958255  | 5.383692868  | 1.41E-07 | 2.37E-06 no |
| INA          | -0.286953025 | -5.383585946 | 1.41E-07 | 2.37E-06 no |

|              |              |              |          |          |    |
|--------------|--------------|--------------|----------|----------|----|
| YPEL1        | -0.28695155  | -5.383555773 | 1.41E-07 | 2.37E-06 | no |
| TGOLN2       | 0.286943645  | 5.383394172  | 1.41E-07 | 2.37E-06 | no |
| EVA1B        | 0.286890281  | 5.3823032    | 1.42E-07 | 2.38E-06 | no |
| FP588        | -0.286823741 | -5.380942941 | 1.43E-07 | 2.40E-06 | no |
| SOAT1        | 0.286760445  | 5.379649058  | 1.44E-07 | 2.41E-06 | no |
| SPTBN2       | -0.286689572 | -5.37820039  | 1.45E-07 | 2.43E-06 | no |
| HIRA         | -0.286669564 | -5.377791449 | 1.45E-07 | 2.43E-06 | no |
| C15orf59     | -0.286640527 | -5.37719796  | 1.45E-07 | 2.44E-06 | no |
| PLAU         | 0.286612156  | 5.376618108  | 1.46E-07 | 2.44E-06 | no |
| MICALL2      | 0.286587094  | 5.376105889  | 1.46E-07 | 2.45E-06 | no |
| MSRB3        | 0.286532328  | 5.374986615  | 1.47E-07 | 2.46E-06 | no |
| TEP1         | 0.286522297  | 5.374781623  | 1.47E-07 | 2.46E-06 | no |
| SHQ1         | 0.286342966  | 5.371117042  | 1.50E-07 | 2.50E-06 | no |
| RRAGB        | -0.286316062 | -5.370567326 | 1.50E-07 | 2.51E-06 | no |
| EMILIN2      | 0.286278766  | 5.369805295  | 1.51E-07 | 2.52E-06 | no |
| ADCK2        | 0.286238035  | 5.368973113  | 1.52E-07 | 2.53E-06 | no |
| ESPNL        | 0.28612731   | 5.366710992  | 1.53E-07 | 2.55E-06 | no |
| PROS1        | 0.285948978  | 5.363068194  | 1.56E-07 | 2.60E-06 | no |
| TPST1        | 0.285934494  | 5.362772341  | 1.56E-07 | 2.60E-06 | no |
| KDELR3       | 0.285781791  | 5.359653586  | 1.59E-07 | 2.64E-06 | no |
| SNX32        | -0.285761899 | -5.359247342 | 1.59E-07 | 2.64E-06 | no |
| ATP8B1       | 0.285709541  | 5.358178122  | 1.60E-07 | 2.66E-06 | no |
| MXRA5        | 0.285653308  | 5.357029833  | 1.61E-07 | 2.67E-06 | no |
| ZNF529       | -0.285557631 | -5.355076202 | 1.63E-07 | 2.69E-06 | no |
| GALNT5       | 0.285518042  | 5.3542679    | 1.63E-07 | 2.70E-06 | no |
| IRF5         | 0.285287582  | 5.349563039  | 1.67E-07 | 2.77E-06 | no |
| LRP4         | -0.285242183 | -5.348636333 | 1.68E-07 | 2.78E-06 | no |
| TCTN1        | 0.285239815  | 5.348587997  | 1.68E-07 | 2.78E-06 | no |
| COL15A1      | 0.284779333  | 5.339190684  | 1.76E-07 | 2.91E-06 | no |
| GRIA4        | -0.284758379 | -5.338763156 | 1.77E-07 | 2.91E-06 | no |
| GSDMD        | 0.284713024  | 5.337837807  | 1.78E-07 | 2.92E-06 | no |
| DCUN1D5      | -0.284708568 | -5.337746885 | 1.78E-07 | 2.92E-06 | no |
| FXR2         | -0.284432838 | -5.332122209 | 1.83E-07 | 3.01E-06 | no |
| SYK          | 0.284418869  | 5.331837279  | 1.83E-07 | 3.01E-06 | no |
| TOR3A        | 0.284228127  | 5.327947189  | 1.87E-07 | 3.06E-06 | no |
| IBSP         | 0.284092847  | 5.325188636  | 1.89E-07 | 3.11E-06 | no |
| XKR8         | 0.284068809  | 5.324698505  | 1.90E-07 | 3.11E-06 | no |
| GATAD2B      | -0.284020556 | -5.323714644 | 1.91E-07 | 3.12E-06 | no |
| FAM168B      | -0.284019236 | -5.323687735 | 1.91E-07 | 3.12E-06 | no |
| LOC100506100 | 0.284017324  | 5.32364875   | 1.91E-07 | 3.12E-06 | no |
| FOSL1        | 0.283998554  | 5.323266054  | 1.91E-07 | 3.12E-06 | no |
| NGFRAP1      | -0.283937015 | -5.322011417 | 1.92E-07 | 3.14E-06 | no |
| COX20        | -0.28392481  | -5.321762586 | 1.93E-07 | 3.14E-06 | no |
| MICA         | 0.28388927   | 5.321038042  | 1.93E-07 | 3.15E-06 | no |
| CYB5R1       | 0.283828562  | 5.319800468  | 1.95E-07 | 3.17E-06 | no |
| SH3BP1       | 0.283746524  | 5.318128171  | 1.96E-07 | 3.19E-06 | no |
| THRA         | -0.283521308 | -5.31353791  | 2.01E-07 | 3.27E-06 | no |
| RSF1         | -0.2834824   | -5.312745003 | 2.02E-07 | 3.28E-06 | no |
| SMOC1        | -0.283474142 | -5.312576716 | 2.02E-07 | 3.28E-06 | no |
| LOC400027    | -0.283452982 | -5.312145524 | 2.02E-07 | 3.28E-06 | no |
| WHAMMP1      | 0.283396958  | 5.311003884  | 2.03E-07 | 3.30E-06 | no |

|              |              |              |          |             |
|--------------|--------------|--------------|----------|-------------|
| C17orf100    | -0.28326806  | -5.308377476 | 2.06E-07 | 3.34E-06 no |
| CXADR        | 0.283233222  | 5.307667665  | 2.07E-07 | 3.35E-06 no |
| CISH         | 0.282813715  | 5.299122289  | 2.16E-07 | 3.49E-06 no |
| DNAJC27-AS1  | -0.282725838 | -5.297332668 | 2.18E-07 | 3.52E-06 no |
| RIC3         | -0.282576726 | -5.294296275 | 2.21E-07 | 3.57E-06 no |
| MT1A         | 0.282482329  | 5.292374282  | 2.23E-07 | 3.61E-06 no |
| GPR173       | -0.282395661 | -5.290609807 | 2.25E-07 | 3.64E-06 no |
| ASTN1        | -0.282347698 | -5.289633339 | 2.26E-07 | 3.65E-06 no |
| LOC100287846 | -0.282301296 | -5.288688775 | 2.28E-07 | 3.67E-06 no |
| GLUD1        | -0.282198195 | -5.286590118 | 2.30E-07 | 3.70E-06 no |
| CXCL13       | 0.282118421  | 5.284966412  | 2.32E-07 | 3.73E-06 no |
| ARMCX4       | -0.282083381 | -5.284253241 | 2.33E-07 | 3.74E-06 no |
| ZNF445       | -0.282055413 | -5.283684029 | 2.33E-07 | 3.75E-06 no |
| SPTLC3       | 0.281988144  | 5.282315024  | 2.35E-07 | 3.77E-06 no |
| KDM3B        | -0.281962654 | -5.281796305 | 2.36E-07 | 3.78E-06 no |
| ERMAP        | 0.281937037  | 5.281274986  | 2.36E-07 | 3.79E-06 no |
| FBX06        | 0.281930306  | 5.281138024  | 2.36E-07 | 3.79E-06 no |
| NINJ1        | 0.28191143   | 5.280753896  | 2.37E-07 | 3.79E-06 no |
| ISG15        | 0.281754735  | 5.277565512  | 2.41E-07 | 3.85E-06 no |
| RFTN2        | -0.281740966 | -5.277285367 | 2.41E-07 | 3.85E-06 no |
| TMEM214      | 0.281701387  | 5.276480101  | 2.42E-07 | 3.86E-06 no |
| ITGA5        | 0.281700334  | 5.276458687  | 2.42E-07 | 3.86E-06 no |
| CRLF3        | 0.281684731  | 5.276141237  | 2.42E-07 | 3.86E-06 no |
| EMR2         | 0.281616549  | 5.274754129  | 2.44E-07 | 3.89E-06 no |
| LILRA2       | 0.281555853  | 5.273519388  | 2.46E-07 | 3.91E-06 no |
| ACTN1        | 0.281371896  | 5.269777551  | 2.50E-07 | 3.98E-06 no |
| ACSS1        | -0.281359902 | -5.269533587 | 2.51E-07 | 3.98E-06 no |
| UBE2Z        | 0.281335236  | 5.269031919  | 2.51E-07 | 3.99E-06 no |
| SGMS2        | 0.281260951  | 5.267521126  | 2.53E-07 | 4.02E-06 no |
| CCL19        | 0.281194191  | 5.266163472  | 2.55E-07 | 4.04E-06 no |
| LRRTM3       | -0.281154185 | -5.265349924 | 2.56E-07 | 4.05E-06 no |
| DEAF1        | -0.281062955 | -5.263494839 | 2.58E-07 | 4.09E-06 no |
| UNC79        | -0.281054886 | -5.263330778 | 2.58E-07 | 4.09E-06 no |
| PTGIR        | 0.281000825  | 5.262231567  | 2.60E-07 | 4.11E-06 no |
| TNK2         | -0.280990607 | -5.262023808 | 2.60E-07 | 4.11E-06 no |
| ZDHHC24      | 0.280772799  | 5.257595771  | 2.66E-07 | 4.20E-06 no |
| RAC3         | -0.280689084 | -5.255894079 | 2.68E-07 | 4.23E-06 no |
| FAXC         | -0.280391526 | -5.249846622 | 2.76E-07 | 4.36E-06 no |
| NFE2L2       | 0.280343568  | 5.248872103  | 2.78E-07 | 4.38E-06 no |
| CDH11        | 0.280309582  | 5.248181518  | 2.79E-07 | 4.39E-06 no |
| C5orf30      | -0.280199788 | -5.245950667 | 2.82E-07 | 4.44E-06 no |
| TMEM234      | 0.280182872  | 5.245607001  | 2.82E-07 | 4.44E-06 no |
| NTNG2        | -0.280113754 | -5.244202772 | 2.84E-07 | 4.47E-06 no |
| CAMSAP3      | -0.27998843  | -5.24165686  | 2.88E-07 | 4.52E-06 no |
| CDH20        | -0.279922082 | -5.240309138 | 2.90E-07 | 4.55E-06 no |
| PSME2        | 0.279878734  | 5.239428678  | 2.91E-07 | 4.57E-06 no |
| CSF2RA       | 0.279860253  | 5.239053289  | 2.92E-07 | 4.57E-06 no |
| RENBP        | 0.279766194  | 5.237142943  | 2.95E-07 | 4.61E-06 no |
| ADAM22       | -0.279578525 | -5.233331849 | 3.00E-07 | 4.70E-06 no |
| DUSP22       | 0.279567856  | 5.233115207  | 3.01E-07 | 4.70E-06 no |
| EML5         | -0.279514388 | -5.232029532 | 3.02E-07 | 4.72E-06 no |

|              |              |              |          |             |
|--------------|--------------|--------------|----------|-------------|
| AGA          | 0.279490968  | 5.23155399   | 3.03E-07 | 4.73E-06 no |
| OPHN1        | -0.27947034  | -5.231135172 | 3.04E-07 | 4.73E-06 no |
| MEDAG        | 0.279436993  | 5.2304581    | 3.05E-07 | 4.75E-06 no |
| BCL7A        | -0.279384192 | -5.229386106 | 3.06E-07 | 4.77E-06 no |
| DOCK11       | 0.27918624   | 5.225367592  | 3.12E-07 | 4.86E-06 no |
| SMIM13       | -0.279113695 | -5.223895081 | 3.15E-07 | 4.89E-06 no |
| TBC1D15      | 0.279009739  | 5.221785162  | 3.18E-07 | 4.94E-06 no |
| HOXB9        | 0.27888772   | 5.219308871  | 3.22E-07 | 5.00E-06 no |
| LMF1         | -0.278837922 | -5.218298338 | 3.24E-07 | 5.02E-06 no |
| CD44         | 0.278802012  | 5.217569669  | 3.25E-07 | 5.04E-06 no |
| RAB34        | 0.278738165  | 5.216274153  | 3.27E-07 | 5.07E-06 no |
| LOC100506190 | 0.278621637  | 5.213909875  | 3.31E-07 | 5.12E-06 no |
| HIST1H2AC    | 0.278524123  | 5.211931585  | 3.34E-07 | 5.17E-06 no |
| C17orf75     | -0.278367264 | -5.2087497   | 3.39E-07 | 5.25E-06 no |
| PAR-SN       | -0.27831458  | -5.207681116 | 3.41E-07 | 5.27E-06 no |
| S1PR3        | 0.278252654  | 5.206425125  | 3.43E-07 | 5.30E-06 no |
| GALNT2       | 0.278249803  | 5.206367302  | 3.43E-07 | 5.30E-06 no |
| IL7          | 0.278083453  | 5.20299376   | 3.49E-07 | 5.38E-06 no |
| SIGLEC15     | 0.278073965  | 5.202801345  | 3.50E-07 | 5.39E-06 no |
| RPL39L       | 0.278052266  | 5.202361348  | 3.50E-07 | 5.39E-06 no |
| FOXP3        | 0.277994229  | 5.201184506  | 3.52E-07 | 5.42E-06 no |
| TMEM8A       | 0.277989634  | 5.201091335  | 3.53E-07 | 5.42E-06 no |
| BCAN         | -0.277917816 | -5.199635162 | 3.55E-07 | 5.45E-06 no |
| MAPK12       | -0.277911816 | -5.199513502 | 3.55E-07 | 5.45E-06 no |
| TREML3P      | 0.277865198  | 5.198568343  | 3.57E-07 | 5.48E-06 no |
| TMEM59       | 0.277825288  | 5.197759212  | 3.58E-07 | 5.49E-06 no |
| VASP         | 0.277776339  | 5.19676686   | 3.60E-07 | 5.52E-06 no |
| FAM110C      | 0.277752033  | 5.196274117  | 3.61E-07 | 5.53E-06 no |
| MYH7B        | -0.277746591 | -5.196163807 | 3.61E-07 | 5.53E-06 no |
| LOXL1        | 0.277678499  | 5.194783463  | 3.64E-07 | 5.56E-06 no |
| STK38        | 0.277661768  | 5.194444327  | 3.64E-07 | 5.56E-06 no |
| PPM1L        | -0.27765788  | -5.194365512 | 3.64E-07 | 5.56E-06 no |
| KIF1B        | -0.277558968 | -5.192360597 | 3.68E-07 | 5.61E-06 no |
| LRRC2        | 0.277537865  | 5.19193287   | 3.69E-07 | 5.62E-06 no |
| ZNF25        | -0.277476915 | -5.190697544 | 3.71E-07 | 5.65E-06 no |
| CBS          | -0.277450381 | -5.190159786 | 3.72E-07 | 5.66E-06 no |
| SMIM18       | -0.27726607  | -5.186424722 | 3.79E-07 | 5.77E-06 no |
| GNAZ         | -0.277192273 | -5.184929394 | 3.82E-07 | 5.81E-06 no |
| S100A10      | 0.277166218  | 5.184401475  | 3.83E-07 | 5.81E-06 no |
| HIRIP3       | -0.277165846 | -5.184393923 | 3.83E-07 | 5.81E-06 no |
| LOC100289511 | 0.277165284  | 5.184382544  | 3.83E-07 | 5.81E-06 no |
| ZFP2         | -0.277095263 | -5.182963855 | 3.86E-07 | 5.85E-06 no |
| SMIM3        | 0.277040359  | 5.181851524  | 3.88E-07 | 5.87E-06 no |
| RHOQ         | 0.277018437  | 5.181407397  | 3.89E-07 | 5.88E-06 no |
| C2orf29      | 0.276822437  | 5.177437006  | 3.96E-07 | 5.99E-06 no |
| TAPBP        | 0.276793047  | 5.176841724  | 3.98E-07 | 6.01E-06 no |
| LOC100132707 | 0.276592477  | 5.172779592  | 4.06E-07 | 6.13E-06 no |
| RNU6-64      | 0.276502753  | 5.170962661  | 4.09E-07 | 6.18E-06 no |
| NLRP1        | 0.276495665  | 5.170819128  | 4.10E-07 | 6.18E-06 no |
| STK4         | 0.276342993  | 5.167727833  | 4.16E-07 | 6.26E-06 no |
| C7orf31      | 0.276341519  | 5.167698     | 4.16E-07 | 6.26E-06 no |

|           |              |              |          |          |    |
|-----------|--------------|--------------|----------|----------|----|
| Clorf186  | 0.276257584  | 5.165998674  | 4.19E-07 | 6.31E-06 | no |
| KLHL28    | -0.276164114 | -5.16410644  | 4.23E-07 | 6.37E-06 | no |
| SAA1      | 0.276140866  | 5.163635824  | 4.24E-07 | 6.38E-06 | no |
| TERF2     | -0.276127935 | -5.163374069 | 4.25E-07 | 6.38E-06 | no |
| LOC728730 | -0.276060649 | -5.162012062 | 4.28E-07 | 6.42E-06 | no |
| GPR123    | -0.27605252  | -5.16184752  | 4.28E-07 | 6.42E-06 | no |
| TCEAL2    | -0.276037052 | -5.161534439 | 4.29E-07 | 6.43E-06 | no |
| PALD1     | 0.276030626  | 5.161404379  | 4.29E-07 | 6.43E-06 | no |
| MFSD12    | 0.276010202  | 5.160990978  | 4.30E-07 | 6.43E-06 | no |
| FAM20C    | 0.275927058  | 5.159308156  | 4.34E-07 | 6.48E-06 | no |
| KLRK1     | 0.275922208  | 5.159209996  | 4.34E-07 | 6.48E-06 | no |
| JUNB      | 0.27589521   | 5.158663588  | 4.35E-07 | 6.49E-06 | no |
| FAM91A1   | 0.275808883  | 5.156916539  | 4.39E-07 | 6.55E-06 | no |
| AXIN2     | -0.275798075 | -5.156697819 | 4.39E-07 | 6.55E-06 | no |
| BHLHE41   | 0.275740583  | 5.155534408  | 4.42E-07 | 6.58E-06 | no |
| PCK2      | 0.275700676  | 5.154726878  | 4.43E-07 | 6.60E-06 | no |
| GTSF1     | 0.275670278  | 5.154111779  | 4.45E-07 | 6.62E-06 | no |
| TMEM151B  | -0.27565504  | -5.15380346  | 4.45E-07 | 6.62E-06 | no |
| SLC16A3   | 0.275629465  | 5.153285976  | 4.47E-07 | 6.64E-06 | no |
| PSTK      | -0.275604434 | -5.152779507 | 4.48E-07 | 6.65E-06 | no |
| ZKSCAN2   | -0.275572363 | -5.152130624 | 4.49E-07 | 6.67E-06 | no |
| CTNNB1    | 0.275563259  | 5.151946436  | 4.50E-07 | 6.67E-06 | no |
| ZMYND11   | -0.275543622 | -5.151549134 | 4.50E-07 | 6.68E-06 | no |
| LOC728431 | 0.275486383  | 5.150391092  | 4.53E-07 | 6.71E-06 | no |
| ADAMDEC1  | 0.275468865  | 5.150036694  | 4.54E-07 | 6.71E-06 | no |
| FCGRT     | 0.275465481  | 5.149968232  | 4.54E-07 | 6.71E-06 | no |
| 39692     | -0.275438316 | -5.149418683 | 4.55E-07 | 6.73E-06 | no |
| KSR2      | -0.275299319 | -5.146606917 | 4.62E-07 | 6.82E-06 | no |
| HTRA3     | 0.275247784  | 5.145564507  | 4.64E-07 | 6.85E-06 | no |
| ECRP      | 0.27520175   | 5.144633416  | 4.66E-07 | 6.87E-06 | no |
| C3orf38   | 0.27519937   | 5.14458527   | 4.66E-07 | 6.87E-06 | no |
| CRTAP     | 0.275176271  | 5.144118092  | 4.67E-07 | 6.88E-06 | no |
| NFKBIE    | 0.275157409  | 5.143736602  | 4.68E-07 | 6.89E-06 | no |
| TPSB2     | 0.275157201  | 5.143732386  | 4.68E-07 | 6.89E-06 | no |
| NFKBIZ    | 0.275005906  | 5.140672656  | 4.75E-07 | 6.99E-06 | no |
| LAMC3     | 0.274849223  | 5.137504378  | 4.83E-07 | 7.09E-06 | no |
| SLC9A9    | 0.27482855   | 5.137086373  | 4.84E-07 | 7.10E-06 | no |
| BATF2     | 0.274755212  | 5.135603607  | 4.87E-07 | 7.14E-06 | no |
| HTATIP2   | 0.274752553  | 5.135549847  | 4.87E-07 | 7.14E-06 | no |
| USP49     | -0.274752091 | -5.135540498 | 4.87E-07 | 7.14E-06 | no |
| NMRK1     | 0.274555841  | 5.131573106  | 4.97E-07 | 7.27E-06 | no |
| LNP1      | -0.274520277 | -5.130854213 | 4.99E-07 | 7.30E-06 | no |
| CXorf65   | 0.274506373  | 5.130573176  | 4.99E-07 | 7.30E-06 | no |
| HGSNAT    | 0.274482772  | 5.130096117  | 5.01E-07 | 7.31E-06 | no |
| C5orf15   | 0.27433291   | 5.127067177  | 5.08E-07 | 7.42E-06 | no |
| RAB42     | 0.274315731  | 5.12671999   | 5.09E-07 | 7.42E-06 | no |
| LGALS7B   | 0.274224394  | 5.124874157  | 5.14E-07 | 7.49E-06 | no |
| MARCO     | 0.274178941  | 5.123955653  | 5.16E-07 | 7.52E-06 | no |
| TUBA1C    | 0.274155434  | 5.12348064   | 5.17E-07 | 7.53E-06 | no |
| LINC00461 | -0.27414944  | -5.123359513 | 5.17E-07 | 7.53E-06 | no |
| HLA-F     | 0.274100911  | 5.122378921  | 5.20E-07 | 7.56E-06 | no |

|              |              |              |          |          |    |
|--------------|--------------|--------------|----------|----------|----|
| LINC00672    | -0.274047754 | -5.121304843 | 5.23E-07 | 7.59E-06 | no |
| HSD11B1L     | -0.273841119 | -5.117130147 | 5.33E-07 | 7.75E-06 | no |
| EPS15L1      | 0.273777605  | 5.115847117  | 5.37E-07 | 7.79E-06 | no |
| TXNDC5       | 0.27373794   | 5.115045897  | 5.39E-07 | 7.81E-06 | no |
| CC2D1B       | 0.273681058  | 5.113896943  | 5.42E-07 | 7.85E-06 | no |
| TMEM71       | 0.273679391  | 5.113863267  | 5.42E-07 | 7.85E-06 | no |
| CLEC4C       | 0.273678299  | 5.113841201  | 5.42E-07 | 7.85E-06 | no |
| EBF4         | -0.273649652 | -5.113262593 | 5.44E-07 | 7.86E-06 | no |
| STK40        | 0.273579162  | 5.111838879  | 5.47E-07 | 7.91E-06 | no |
| LOC100630918 | -0.273537809 | -5.111003707 | 5.50E-07 | 7.94E-06 | no |
| RARRES2      | 0.273345933  | 5.107128914  | 5.60E-07 | 8.09E-06 | no |
| TMEM176A     | 0.273319065  | 5.106586382  | 5.62E-07 | 8.10E-06 | no |
| PFN2         | -0.273295224 | -5.106104995 | 5.63E-07 | 8.12E-06 | no |
| ABCA13       | 0.273196614  | 5.104113998  | 5.69E-07 | 8.19E-06 | no |
| KDM4B        | -0.273172238 | -5.103621857 | 5.70E-07 | 8.20E-06 | no |
| HEATR3       | 0.273041112  | 5.100974654  | 5.77E-07 | 8.30E-06 | no |
| ISLR         | 0.272878826  | 5.097698813  | 5.87E-07 | 8.43E-06 | no |
| LRRTM2       | -0.272849642 | -5.097109761 | 5.88E-07 | 8.45E-06 | no |
| CDV3         | 0.27283291   | 5.096772057  | 5.89E-07 | 8.46E-06 | no |
| AGPAT2       | 0.272745256  | 5.095002976  | 5.94E-07 | 8.53E-06 | no |
| NRXN2        | -0.272637314 | -5.092824622 | 6.01E-07 | 8.61E-06 | no |
| NIPAL2       | 0.272510141  | 5.09025842   | 6.08E-07 | 8.71E-06 | no |
| USP27X       | -0.272505325 | -5.090161248 | 6.09E-07 | 8.71E-06 | no |
| GPHN         | -0.272388393 | -5.087801989 | 6.16E-07 | 8.81E-06 | no |
| STEAP1       | 0.27236453   | 5.087320535  | 6.17E-07 | 8.82E-06 | no |
| CHI3L1       | 0.272290581  | 5.085828677  | 6.22E-07 | 8.88E-06 | no |
| PHYHIPL      | -0.27227466  | -5.085507479 | 6.23E-07 | 8.89E-06 | no |
| FAM117B      | -0.272214207 | -5.084287978 | 6.26E-07 | 8.94E-06 | no |
| B3GNT5       | 0.272191572  | 5.083831376  | 6.28E-07 | 8.95E-06 | no |
| ASF1A        | -0.272145787 | -5.082907821 | 6.31E-07 | 8.99E-06 | no |
| AIFM1        | -0.272139618 | -5.082783395 | 6.31E-07 | 8.99E-06 | no |
| SLC31A1      | 0.272075984  | 5.08149988   | 6.35E-07 | 9.04E-06 | no |
| FCRL3        | 0.271868843  | 5.077322255  | 6.48E-07 | 9.22E-06 | no |
| SLC17A9      | 0.271848932  | 5.076920731  | 6.49E-07 | 9.23E-06 | no |
| KCNIP2       | -0.271763534 | -5.075198665 | 6.55E-07 | 9.30E-06 | no |
| SCAPER       | -0.271582283 | -5.071544168 | 6.66E-07 | 9.46E-06 | no |
| MAPK13       | 0.271293956  | 5.065731919  | 6.86E-07 | 9.73E-06 | no |
| CAMSAP2      | -0.271260766 | -5.065062957 | 6.88E-07 | 9.74E-06 | no |
| GDPD1        | -0.27125975  | -5.06504248  | 6.88E-07 | 9.74E-06 | no |
| ZNF737       | -0.271221683 | -5.064275233 | 6.90E-07 | 9.77E-06 | no |
| ZNF711       | -0.27121371  | -5.064114529 | 6.91E-07 | 9.77E-06 | no |
| ENTPD7       | 0.271212248  | 5.064085067  | 6.91E-07 | 9.77E-06 | no |
| GDI1         | -0.271133068 | -5.062489299 | 6.96E-07 | 9.84E-06 | no |
| DBIL5P       | -0.27105825  | -5.060981526 | 7.02E-07 | 9.91E-06 | no |
| CASKIN1      | -0.271033605 | -5.060484897 | 7.03E-07 | 9.92E-06 | no |
| CCDC144C     | -0.271033529 | -5.060483352 | 7.03E-07 | 9.92E-06 | no |
| TGFBI        | 0.27098762   | 5.059558236  | 7.06E-07 | 9.96E-06 | no |
| YLPM1        | -0.270970401 | -5.059211274 | 7.08E-07 | 9.97E-06 | no |
| DCAF7        | -0.270870273 | -5.057193765 | 7.15E-07 | 1.01E-05 | no |
| CLEC1A       | 0.270815086  | 5.056081863  | 7.18E-07 | 1.01E-05 | no |
| LINC00634    | -0.270802475 | -5.055827769 | 7.19E-07 | 1.01E-05 | no |

|            |              |              |          |          |    |
|------------|--------------|--------------|----------|----------|----|
| PPP1R26    | -0.27075667  | -5.054904948 | 7.23E-07 | 1.01E-05 | no |
| BCRP2      | -0.270713108 | -5.054027348 | 7.26E-07 | 1.02E-05 | no |
| HMP19      | -0.270644808 | -5.052651443 | 7.31E-07 | 1.02E-05 | no |
| RPGRIP1    | 0.270609869  | 5.051947625  | 7.33E-07 | 1.03E-05 | no |
| AKT3       | -0.270558966 | -5.050922246 | 7.37E-07 | 1.03E-05 | no |
| JPH3       | -0.270551077 | -5.050763343 | 7.37E-07 | 1.03E-05 | no |
| CLNK       | 0.270528735  | 5.050313317  | 7.39E-07 | 1.03E-05 | no |
| PAK7       | -0.270479799 | -5.049327656 | 7.42E-07 | 1.04E-05 | no |
| ITGA11     | 0.270467554  | 5.049081025  | 7.43E-07 | 1.04E-05 | no |
| DPP6       | -0.270459957 | -5.048928014 | 7.44E-07 | 1.04E-05 | no |
| GUSB       | 0.270442994  | 5.048586361  | 7.45E-07 | 1.04E-05 | no |
| SCRT1      | -0.270432686 | -5.048378744 | 7.46E-07 | 1.04E-05 | no |
| SHISA7     | -0.270366817 | -5.04705212  | 7.51E-07 | 1.05E-05 | no |
| MAGI1      | -0.270284048 | -5.045385252 | 7.57E-07 | 1.05E-05 | no |
| PCSK7      | 0.270187884  | 5.043448779  | 7.64E-07 | 1.06E-05 | no |
| SNAI1      | 0.270154682  | 5.042780215  | 7.66E-07 | 1.07E-05 | no |
| COQ3       | -0.270081861 | -5.041313954 | 7.72E-07 | 1.07E-05 | no |
| SNTB2      | 0.27007803   | 5.041236816  | 7.72E-07 | 1.07E-05 | no |
| ICA1L      | -0.270004345 | -5.039753246 | 7.78E-07 | 1.08E-05 | no |
| TBC1D1     | 0.269922515  | 5.038105794  | 7.84E-07 | 1.09E-05 | no |
| RBPMS      | 0.26986479   | 5.036943728  | 7.88E-07 | 1.09E-05 | no |
| TMED9      | 0.269748598  | 5.034604813  | 7.97E-07 | 1.10E-05 | no |
| RCOR2      | -0.269690723 | -5.033439889 | 8.02E-07 | 1.11E-05 | no |
| CHGB       | -0.269664941 | -5.032920967 | 8.04E-07 | 1.11E-05 | no |
| WASF3      | -0.269621811 | -5.032052896 | 8.07E-07 | 1.12E-05 | no |
| MAN2B2     | 0.26961703   | 5.031956668  | 8.08E-07 | 1.12E-05 | no |
| FAM192A    | -0.269566205 | -5.030933777 | 8.12E-07 | 1.12E-05 | no |
| TBX21      | 0.269547175  | 5.030550782  | 8.13E-07 | 1.12E-05 | no |
| PRKCD      | 0.269337152  | 5.026324416  | 8.30E-07 | 1.14E-05 | no |
| NMNAT3     | 0.269135928  | 5.022275844  | 8.46E-07 | 1.17E-05 | no |
| TPTE2P1    | -0.269127537 | -5.022107044 | 8.47E-07 | 1.17E-05 | no |
| TXLNA      | 0.269110624  | 5.021766791  | 8.48E-07 | 1.17E-05 | no |
| GSN        | 0.269094631  | 5.021445045  | 8.50E-07 | 1.17E-05 | no |
| RGS12      | -0.269081235 | -5.021175559 | 8.51E-07 | 1.17E-05 | no |
| SLC16A10   | 0.269043448  | 5.020415401  | 8.54E-07 | 1.17E-05 | no |
| CDH10      | -0.268824296 | -5.016007297 | 8.72E-07 | 1.20E-05 | no |
| BANF1      | -0.268663261 | -5.012768697 | 8.86E-07 | 1.22E-05 | no |
| MCM3AP-AS1 | -0.268611007 | -5.011717913 | 8.91E-07 | 1.22E-05 | no |
| SLC41A2    | 0.268604144  | 5.0115799    | 8.91E-07 | 1.22E-05 | no |
| HS2ST1     | 0.268509109  | 5.009668964  | 8.99E-07 | 1.23E-05 | no |
| FAM69B     | -0.268502409 | -5.009534246 | 9.00E-07 | 1.23E-05 | no |
| BEND3P3    | -0.268487569 | -5.009235864 | 9.01E-07 | 1.23E-05 | no |
| KIAA0195   | -0.268385527 | -5.007184236 | 9.10E-07 | 1.24E-05 | no |
| FRA10AC1   | -0.268318258 | -5.005831829 | 9.16E-07 | 1.25E-05 | no |
| CHD7       | -0.268299491 | -5.005454543 | 9.18E-07 | 1.25E-05 | no |
| DHX32      | 0.268295298  | 5.005370254  | 9.18E-07 | 1.25E-05 | no |
| LPAR5      | 0.26829128   | 5.005289485  | 9.19E-07 | 1.25E-05 | no |
| NYAP1      | -0.26821468  | -5.003749622 | 9.25E-07 | 1.26E-05 | no |
| CPNE5      | -0.268202316 | -5.003501094 | 9.26E-07 | 1.26E-05 | no |
| GREB1      | -0.268189159 | -5.003236622 | 9.28E-07 | 1.26E-05 | no |
| C11orf35   | 0.268010886  | 4.999653355  | 9.44E-07 | 1.28E-05 | no |



|              |              |              |          |             |
|--------------|--------------|--------------|----------|-------------|
| HR           | -0.267992707 | -4.999287988 | 9.45E-07 | 1.29E-05 no |
| FAM157A      | 0.26797565   | 4.998945181  | 9.47E-07 | 1.29E-05 no |
| RNF157       | -0.26793056  | -4.998038982 | 9.51E-07 | 1.29E-05 no |
| ARSA         | 0.267867096  | 4.996763592  | 9.57E-07 | 1.30E-05 no |
| ZMPSTE24     | 0.267846768  | 4.996355091  | 9.59E-07 | 1.30E-05 no |
| LOC100652772 | -0.267840363 | -4.996226366 | 9.59E-07 | 1.30E-05 no |
| IFI6         | 0.267831872  | 4.996055751  | 9.60E-07 | 1.30E-05 no |
| C11orf21     | 0.267782347  | 4.995060558  | 9.65E-07 | 1.31E-05 no |
| C6orf201     | 0.267733154  | 4.994072068  | 9.69E-07 | 1.31E-05 no |
| CFDP1        | -0.267686788 | -4.99314043  | 9.74E-07 | 1.32E-05 no |
| ETHE1        | 0.267571199  | 4.990818049  | 9.85E-07 | 1.33E-05 no |
| INMT         | 0.267454874  | 4.988481135  | 9.96E-07 | 1.34E-05 no |
| PLCB1        | -0.267387624 | -4.987130209 | 1.00E-06 | 1.35E-05 no |
| TMEM61       | 0.267385313  | 4.987083774  | 1.00E-06 | 1.35E-05 no |
| KLHL11       | -0.267324728 | -4.985866808 | 1.01E-06 | 1.36E-05 no |
| ZNF775       | -0.267226645 | -4.983896755 | 1.02E-06 | 1.37E-05 no |
| HELZ2        | 0.267191851  | 4.983197939  | 1.02E-06 | 1.37E-05 no |
| SKAP2        | 0.267099168  | 4.981336558  | 1.03E-06 | 1.39E-05 no |
| SLIT2        | 0.267038536  | 4.980118948  | 1.04E-06 | 1.39E-05 no |
| TUT1         | -0.267015813 | -4.979662644 | 1.04E-06 | 1.40E-05 no |
| ZNFX1-AS1    | -0.266851371 | -4.976360711 | 1.06E-06 | 1.42E-05 no |
| TTBK1        | -0.266839935 | -4.97613111  | 1.06E-06 | 1.42E-05 no |
| GIMAP5       | 0.266778919  | 4.97490605   | 1.06E-06 | 1.42E-05 no |
| OMG          | -0.266774428 | -4.974815888 | 1.06E-06 | 1.42E-05 no |
| MN1          | -0.266755575 | -4.97443738  | 1.07E-06 | 1.43E-05 no |
| TNFSF4       | 0.266719625  | 4.973715639  | 1.07E-06 | 1.43E-05 no |
| VSIG10L      | 0.266697863  | 4.973278753  | 1.07E-06 | 1.43E-05 no |
| SOX8         | -0.266487754 | -4.969061087 | 1.09E-06 | 1.46E-05 no |
| LRRN1        | -0.26647383  | -4.968781602 | 1.09E-06 | 1.46E-05 no |
| CLASP2       | -0.266330745 | -4.965909825 | 1.11E-06 | 1.48E-05 no |
| CAMSAP1      | -0.266325189 | -4.965798329 | 1.11E-06 | 1.48E-05 no |
| CPPED1       | 0.266302158  | 4.965336125  | 1.11E-06 | 1.48E-05 no |
| PCYT1A       | 0.266279117  | 4.964873726  | 1.12E-06 | 1.49E-05 no |
| GPRIN1       | -0.266141808 | -4.962118317 | 1.13E-06 | 1.50E-05 no |
| PARP2        | -0.266102048 | -4.961320516 | 1.13E-06 | 1.51E-05 no |
| RCAN3        | 0.266092769  | 4.96113433   | 1.14E-06 | 1.51E-05 no |
| ENHO         | -0.266066618 | -4.960609608 | 1.14E-06 | 1.51E-05 no |
| C12orf76     | -0.266007038 | -4.959414186 | 1.14E-06 | 1.52E-05 no |
| ZAK          | 0.265989073  | 4.959053753  | 1.15E-06 | 1.52E-05 no |
| TMEM119      | 0.265964269  | 4.958556116  | 1.15E-06 | 1.52E-05 no |
| TMEM26       | 0.265832568  | 4.955913959  | 1.16E-06 | 1.54E-05 no |
| KIDINS220    | -0.265752705 | -4.954311904 | 1.17E-06 | 1.55E-05 no |
| SEC61A1      | 0.265628747  | 4.951825534  | 1.19E-06 | 1.57E-05 no |
| INPP5A       | -0.265470596 | -4.948653712 | 1.21E-06 | 1.59E-05 no |
| LMTK3        | -0.265457726 | -4.948395615 | 1.21E-06 | 1.60E-05 no |
| FAM171A2     | -0.265427588 | -4.947791223 | 1.21E-06 | 1.60E-05 no |
| QSOX1        | 0.265373526  | 4.946707115  | 1.22E-06 | 1.61E-05 no |
| NUCB1        | 0.265319943  | 4.945632643  | 1.22E-06 | 1.61E-05 no |
| PHF20L1      | -0.26531745  | -4.945582658 | 1.22E-06 | 1.61E-05 no |
| COA5         | -0.265302895 | -4.945290813 | 1.22E-06 | 1.61E-05 no |
| DDOST        | 0.265302337  | 4.945279619  | 1.22E-06 | 1.61E-05 no |

|              |              |              |          |             |
|--------------|--------------|--------------|----------|-------------|
| LD0C1L       | -0.265156104 | -4.942347616 | 1.24E-06 | 1.64E-05 no |
| TSPYL4       | -0.265087391 | -4.940970021 | 1.25E-06 | 1.64E-05 no |
| ST3GAL1      | 0.265085212  | 4.940926335  | 1.25E-06 | 1.64E-05 no |
| STC1         | 0.264875522  | 4.9367229    | 1.28E-06 | 1.68E-05 no |
| SLC25A19     | 0.264862353  | 4.936458947  | 1.28E-06 | 1.68E-05 no |
| PDE6G        | 0.264841521  | 4.936041391  | 1.28E-06 | 1.68E-05 no |
| NAGLU        | 0.264833785  | 4.935886322  | 1.28E-06 | 1.68E-05 no |
| NUDT19       | 0.264796216  | 4.935133326  | 1.29E-06 | 1.69E-05 no |
| SPATC1       | 0.264738884  | 4.933984265  | 1.29E-06 | 1.69E-05 no |
| PIGK         | 0.264734075  | 4.933887875  | 1.29E-06 | 1.69E-05 no |
| LRRC37A6P    | 0.264731648  | 4.933839236  | 1.29E-06 | 1.69E-05 no |
| ARRB2        | 0.264726661  | 4.933739295  | 1.29E-06 | 1.69E-05 no |
| PSMC2        | 0.264713355  | 4.933472613  | 1.30E-06 | 1.69E-05 no |
| TMEM200B     | 0.264681626  | 4.932836733  | 1.30E-06 | 1.70E-05 no |
| TERF2IP      | -0.264675179 | -4.932707533 | 1.30E-06 | 1.70E-05 no |
| TARSL2       | -0.264638854 | -4.931979561 | 1.30E-06 | 1.70E-05 no |
| IFI44L       | 0.264627022  | 4.931742443  | 1.31E-06 | 1.70E-05 no |
| ANKRD36BP1   | 0.264532807  | 4.929854462  | 1.32E-06 | 1.72E-05 no |
| PHGDH        | -0.264527265 | -4.929743404 | 1.32E-06 | 1.72E-05 no |
| FCRL2        | 0.264444562  | 4.928086259  | 1.33E-06 | 1.73E-05 no |
| ALCAM        | -0.264394566 | -4.92708452  | 1.34E-06 | 1.74E-05 no |
| PTPN9        | 0.264362637  | 4.926444794  | 1.34E-06 | 1.74E-05 no |
| RBMS1        | 0.264354141  | 4.926274564  | 1.34E-06 | 1.74E-05 no |
| FAM177B      | 0.264316597  | 4.925522384  | 1.35E-06 | 1.75E-05 no |
| ACSM3        | 0.264278592  | 4.924760986  | 1.35E-06 | 1.75E-05 no |
| STARD10      | -0.264226358 | -4.923714551 | 1.36E-06 | 1.76E-05 no |
| MADD         | -0.264090306 | -4.920989171 | 1.37E-06 | 1.78E-05 no |
| PIM3         | 0.26408747   | 4.920932351  | 1.38E-06 | 1.78E-05 no |
| RNASEL       | 0.264031934  | 4.919819961  | 1.38E-06 | 1.79E-05 no |
| CHST2        | 0.264020444  | 4.919589819  | 1.38E-06 | 1.79E-05 no |
| EMR4P        | 0.264003985  | 4.919260157  | 1.39E-06 | 1.79E-05 no |
| EFR3B        | -0.263997822 | -4.919136706 | 1.39E-06 | 1.79E-05 no |
| PLA2G4A      | 0.26399348   | 4.919049754  | 1.39E-06 | 1.79E-05 no |
| SLC2A3       | 0.263979796  | 4.918775665  | 1.39E-06 | 1.79E-05 no |
| FAM155B      | -0.263865664 | -4.916489848 | 1.40E-06 | 1.81E-05 no |
| SMOC2        | 0.263809569  | 4.915366455  | 1.41E-06 | 1.82E-05 no |
| CRYBB1       | 0.26379037   | 4.914981979  | 1.41E-06 | 1.82E-05 no |
| SEC31A       | 0.263766941  | 4.9145128    | 1.42E-06 | 1.83E-05 no |
| EOGT         | 0.263732816  | 4.913829454  | 1.42E-06 | 1.83E-05 no |
| FXVD6-FXVD2  | -0.263700495 | -4.91318224  | 1.43E-06 | 1.84E-05 no |
| SH2D3C       | 0.263692973  | 4.913031622  | 1.43E-06 | 1.84E-05 no |
| TADA2A       | -0.263676618 | -4.91270414  | 1.43E-06 | 1.84E-05 no |
| GPM6B        | -0.26361534  | -4.911477156 | 1.44E-06 | 1.85E-05 no |
| EIF2AK4      | 0.263580165  | 4.910772869  | 1.44E-06 | 1.85E-05 no |
| CADM2        | -0.263560196 | -4.910373055 | 1.45E-06 | 1.85E-05 no |
| KCNK3        | -0.263539661 | -4.909961916 | 1.45E-06 | 1.86E-05 no |
| CCL23        | 0.263520738  | 4.909583047  | 1.45E-06 | 1.86E-05 no |
| HLA-L        | 0.263520565  | 4.909579595  | 1.45E-06 | 1.86E-05 no |
| CYB5R4       | 0.263511077  | 4.909389634  | 1.45E-06 | 1.86E-05 no |
| TNFAIP8L2-SC | 0.263439539  | 4.907957414  | 1.46E-06 | 1.87E-05 no |
| CARD9        | 0.263387588  | 4.906917396  | 1.47E-06 | 1.88E-05 no |

|              |              |              |          |          |    |
|--------------|--------------|--------------|----------|----------|----|
| MAPK8IP3     | -0.263327798 | -4.905720504 | 1.48E-06 | 1.89E-05 | no |
| LOC100505549 | 0.263285954  | 4.904882905  | 1.48E-06 | 1.89E-05 | no |
| GABBR1       | -0.263266337 | -4.904490219 | 1.49E-06 | 1.90E-05 | no |
| ZBTB47       | -0.263187225 | -4.902906705 | 1.50E-06 | 1.91E-05 | no |
| UNC13D       | 0.263163878  | 4.90243941   | 1.50E-06 | 1.91E-05 | no |
| HERC6        | 0.263106262  | 4.901286261  | 1.51E-06 | 1.92E-05 | no |
| SBN02        | 0.263045436  | 4.900068916  | 1.52E-06 | 1.93E-05 | no |
| TMEM246      | -0.2630205   | -4.89956989  | 1.52E-06 | 1.94E-05 | no |
| FOXRED1      | -0.262951656 | -4.898192176 | 1.53E-06 | 1.95E-05 | no |
| BID          | -0.262872313 | -4.896604466 | 1.54E-06 | 1.96E-05 | no |
| FCGR1B       | 0.26284773   | 4.896112562  | 1.55E-06 | 1.96E-05 | no |
| TTC3         | -0.262847718 | -4.896112325 | 1.55E-06 | 1.96E-05 | no |
| KCNB1        | -0.262836588 | -4.895889623 | 1.55E-06 | 1.96E-05 | no |
| PFKM         | -0.262803755 | -4.895232667 | 1.55E-06 | 1.97E-05 | no |
| ANXA5        | 0.262769883  | 4.894554925  | 1.56E-06 | 1.97E-05 | no |
| RBP5         | 0.262727542  | 4.893707768  | 1.56E-06 | 1.98E-05 | no |
| TMED3        | 0.262696917  | 4.893095058  | 1.57E-06 | 1.99E-05 | no |
| ALDH16A1     | 0.262640801  | 4.891972354  | 1.58E-06 | 1.99E-05 | no |
| NEAT1        | 0.262589316  | 4.890942374  | 1.59E-06 | 2.00E-05 | no |
| GLRX         | 0.262553254  | 4.89022095   | 1.59E-06 | 2.01E-05 | no |
| CD300E       | 0.262513097  | 4.889417637  | 1.60E-06 | 2.01E-05 | no |
| CYB561D2     | 0.262513052  | 4.889416741  | 1.60E-06 | 2.01E-05 | no |
| IFNAR1       | 0.262481437  | 4.888784317  | 1.60E-06 | 2.02E-05 | no |
| SLC39A8      | 0.262395796  | 4.887071275  | 1.61E-06 | 2.03E-05 | no |
| ADAMTS14     | 0.262306682  | 4.885288872  | 1.63E-06 | 2.05E-05 | no |
| C11orf63     | 0.262286725  | 4.884889743  | 1.63E-06 | 2.05E-05 | no |
| RER1         | 0.262212928  | 4.883413826  | 1.64E-06 | 2.07E-05 | no |
| DEGS1        | 0.262131852  | 4.881792446  | 1.66E-06 | 2.08E-05 | no |
| APC2         | -0.262117266 | -4.88150078  | 1.66E-06 | 2.08E-05 | no |
| TSPO         | 0.262074914  | 4.880653862  | 1.66E-06 | 2.09E-05 | no |
| GADD45B      | 0.261990738  | 4.878970691  | 1.68E-06 | 2.10E-05 | no |
| S100A9       | 0.261897234  | 4.877101145  | 1.69E-06 | 2.12E-05 | no |
| RHOD         | 0.261895586  | 4.87706819   | 1.69E-06 | 2.12E-05 | no |
| ZXDC         | -0.261868376 | -4.876524182 | 1.70E-06 | 2.13E-05 | no |
| SPNS3        | 0.261792041  | 4.874998048  | 1.71E-06 | 2.14E-05 | no |
| ACTL10       | 0.261770389  | 4.874565189  | 1.71E-06 | 2.14E-05 | no |
| KCNE1        | 0.261616079  | 4.871480513  | 1.74E-06 | 2.17E-05 | no |
| MGC21881     | -0.261597914 | -4.871117419 | 1.74E-06 | 2.18E-05 | no |
| LOC541471    | 0.261577486  | 4.870709106  | 1.74E-06 | 2.18E-05 | no |
| IL3RA        | 0.26157651   | 4.870689591  | 1.74E-06 | 2.18E-05 | no |
| SH3BGRL3     | 0.261556222  | 4.870284077  | 1.75E-06 | 2.18E-05 | no |
| GSTK1        | 0.261493919  | 4.869038804  | 1.76E-06 | 2.19E-05 | no |
| SLC7A1       | -0.261475279 | -4.868666258 | 1.76E-06 | 2.19E-05 | no |
| POLR2F       | -0.26136718  | -4.866505849 | 1.78E-06 | 2.22E-05 | no |
| LOC100131047 | 0.261330752  | 4.865777866  | 1.79E-06 | 2.22E-05 | no |
| SARM1        | -0.261229689 | -4.863758289 | 1.80E-06 | 2.24E-05 | no |
| C9orf64      | 0.261112925  | 4.861425208  | 1.82E-06 | 2.27E-05 | no |
| ZNF292       | -0.261025987 | -4.859688216 | 1.84E-06 | 2.28E-05 | no |
| TSPAN7       | -0.260982592 | -4.858821234 | 1.84E-06 | 2.29E-05 | no |
| SLC35D1      | 0.260970236  | 4.858574401  | 1.85E-06 | 2.29E-05 | no |
| DLG3         | -0.260910725 | -4.857385518 | 1.86E-06 | 2.30E-05 | no |

|              |              |              |          |             |
|--------------|--------------|--------------|----------|-------------|
| GCAT         | -0.260862838 | -4.856428896 | 1.87E-06 | 2.31E-05 no |
| NFKB2        | 0.260806408  | 4.855301664  | 1.88E-06 | 2.32E-05 no |
| TMEM179B     | 0.260713282  | 4.853441536  | 1.89E-06 | 2.34E-05 no |
| MYO10        | -0.260664527 | -4.852467741 | 1.90E-06 | 2.35E-05 no |
| ASB1         | -0.26064097  | -4.851997247 | 1.91E-06 | 2.36E-05 no |
| LOC389906    | -0.260590672 | -4.850992679 | 1.91E-06 | 2.36E-05 no |
| GCA          | 0.260588932  | 4.85095794   | 1.91E-06 | 2.36E-05 no |
| GDAP1L1      | -0.26055139  | -4.850208167 | 1.92E-06 | 2.37E-05 no |
| BEX1         | -0.260535627 | -4.849893374 | 1.92E-06 | 2.37E-05 no |
| SREBF2       | -0.260509456 | -4.849370732 | 1.93E-06 | 2.38E-05 no |
| NCF2         | 0.260382022  | 4.846825985  | 1.95E-06 | 2.41E-05 no |
| WWTR1        | 0.260375252  | 4.84669079   | 1.95E-06 | 2.41E-05 no |
| SLC25A41     | -0.26020379  | -4.843267296 | 1.98E-06 | 2.44E-05 no |
| CD83         | 0.260182907  | 4.842850365  | 1.99E-06 | 2.45E-05 no |
| C4orf32      | 0.260175535  | 4.842703188  | 1.99E-06 | 2.45E-05 no |
| SAMD1        | -0.260111375 | -4.841422282 | 2.00E-06 | 2.46E-05 no |
| RHOA         | 0.260084599  | 4.84088775   | 2.01E-06 | 2.46E-05 no |
| MIB1         | -0.260082461 | -4.840845058 | 2.01E-06 | 2.46E-05 no |
| ANKRD36B     | -0.259938949 | -4.8379803   | 2.03E-06 | 2.50E-05 no |
| FUT7         | 0.259867851  | 4.836561167  | 2.05E-06 | 2.51E-05 no |
| ANKRD16      | -0.259769605 | -4.834600299 | 2.07E-06 | 2.53E-05 no |
| PHLPP2       | -0.259750243 | -4.834213882 | 2.07E-06 | 2.54E-05 no |
| LOC100144595 | -0.259726207 | -4.833734191 | 2.08E-06 | 2.54E-05 no |
| SPIN3        | -0.259703948 | -4.83328996  | 2.08E-06 | 2.54E-05 no |
| PIM2         | 0.25966531   | 4.832518892  | 2.09E-06 | 2.55E-05 no |
| KIAA2013     | 0.259623996  | 4.831694433  | 2.10E-06 | 2.56E-05 no |
| KPNA5        | -0.259489331 | -4.829007298 | 2.12E-06 | 2.59E-05 no |
| CTTNBP2NL    | 0.259481948  | 4.828859981  | 2.12E-06 | 2.59E-05 no |
| KCNJ11       | -0.25946373  | -4.82849648  | 2.13E-06 | 2.59E-05 no |
| GPLD1        | -0.259436627 | -4.827955692 | 2.13E-06 | 2.60E-05 no |
| OPN3         | 0.259402343  | 4.827271662  | 2.14E-06 | 2.61E-05 no |
| VPS37D       | -0.259392571 | -4.827076697 | 2.14E-06 | 2.61E-05 no |
| COL10A1      | 0.259328039  | 4.825789216  | 2.15E-06 | 2.62E-05 no |
| NBEA         | -0.259326972 | -4.825767933 | 2.15E-06 | 2.62E-05 no |
| SV2A         | -0.259296618 | -4.825162357 | 2.16E-06 | 2.63E-05 no |
| TMEM51       | 0.259271872  | 4.824668671  | 2.17E-06 | 2.63E-05 no |
| LINC00515    | -0.259197385 | -4.823182737 | 2.18E-06 | 2.65E-05 no |
| SLC24A3      | -0.259196252 | -4.823160143 | 2.18E-06 | 2.65E-05 no |
| ESRG         | -0.259178196 | -4.822799955 | 2.18E-06 | 2.65E-05 no |
| IDO1         | 0.259116173  | 4.821562757  | 2.20E-06 | 2.66E-05 no |
| KIAA1549     | -0.25909764  | -4.821193081 | 2.20E-06 | 2.67E-05 no |
| FTH1         | 0.259078861  | 4.820818504  | 2.20E-06 | 2.67E-05 no |
| MLLT6        | -0.258787684 | -4.81501128  | 2.27E-06 | 2.74E-05 no |
| C14orf169    | 0.258715407  | 4.813570008  | 2.28E-06 | 2.76E-05 no |
| CHD3         | -0.258695229 | -4.813167655 | 2.29E-06 | 2.76E-05 no |
| LINC00294    | -0.258653668 | -4.812338956 | 2.29E-06 | 2.77E-05 no |
| PLEKHG1      | 0.25863595   | 4.811985663  | 2.30E-06 | 2.77E-05 no |
| SLC6A1       | -0.258600679 | -4.811282399 | 2.31E-06 | 2.78E-05 no |
| CCL21        | 0.258317614  | 4.80563919   | 2.37E-06 | 2.85E-05 no |
| FAM161B      | -0.258304469 | -4.805377166 | 2.37E-06 | 2.86E-05 no |
| ZRANB1       | -0.258190512 | -4.803105717 | 2.39E-06 | 2.89E-05 no |

|           |              |              |          |             |
|-----------|--------------|--------------|----------|-------------|
| DSCAML1   | -0.258103793 | -4.801377319 | 2.41E-06 | 2.91E-05 no |
| CTNNA1    | 0.258084986  | 4.8010025    | 2.42E-06 | 2.91E-05 no |
| C3orf52   | 0.258063233  | 4.80056897   | 2.42E-06 | 2.91E-05 no |
| SLC22A17  | -0.258018617 | -4.799679802 | 2.43E-06 | 2.92E-05 no |
| ARPC2     | 0.257980341  | 4.798917027  | 2.44E-06 | 2.93E-05 no |
| FLRT1     | -0.257964197 | -4.798595313 | 2.45E-06 | 2.94E-05 no |
| BRD3      | -0.257959434 | -4.79850038  | 2.45E-06 | 2.94E-05 no |
| PIR       | 0.257915464  | 4.797624176  | 2.46E-06 | 2.95E-05 no |
| C2orf40   | 0.257881665  | 4.796950674  | 2.46E-06 | 2.95E-05 no |
| GSDMA     | 0.257857596  | 4.796471063  | 2.47E-06 | 2.96E-05 no |
| TMEM50A   | 0.257798835  | 4.795300214  | 2.48E-06 | 2.97E-05 no |
| BEX4      | -0.257684079 | -4.793013788 | 2.51E-06 | 3.00E-05 no |
| DHTKD1    | -0.257381118 | -4.786978574 | 2.58E-06 | 3.09E-05 no |
| MEIS3P1   | 0.25725631   | 4.784492746  | 2.61E-06 | 3.12E-05 no |
| CAMLG     | -0.257253735 | -4.78444145  | 2.61E-06 | 3.12E-05 no |
| KCNQ1     | 0.257249969  | 4.784366439  | 2.61E-06 | 3.12E-05 no |
| MAN2A1    | 0.257192507  | 4.78322205   | 2.63E-06 | 3.13E-05 no |
| SHF       | -0.257190262 | -4.783177344 | 2.63E-06 | 3.13E-05 no |
| FAM171A1  | -0.257138509 | -4.782146707 | 2.64E-06 | 3.15E-05 no |
| CCDC125   | 0.25709841   | 4.781348165  | 2.65E-06 | 3.16E-05 no |
| C1orf61   | -0.257073866 | -4.780859419 | 2.66E-06 | 3.16E-05 no |
| DOPEY1    | -0.257053312 | -4.780450116 | 2.66E-06 | 3.17E-05 no |
| ADHFE1    | -0.257036908 | -4.78012348  | 2.67E-06 | 3.17E-05 no |
| SLC40A1   | 0.256992057  | 4.77923039   | 2.68E-06 | 3.18E-05 no |
| GM2A      | 0.256982495  | 4.779039997  | 2.68E-06 | 3.18E-05 no |
| FRMPD1    | -0.25694962  | -4.778385406 | 2.69E-06 | 3.19E-05 no |
| SLITRK5   | -0.256948492 | -4.778362935 | 2.69E-06 | 3.19E-05 no |
| TSPAN5    | -0.256932134 | -4.778037248 | 2.69E-06 | 3.19E-05 no |
| NRSN1     | -0.256872828 | -4.776856441 | 2.71E-06 | 3.21E-05 no |
| ABCA3     | -0.256855694 | -4.7765153   | 2.71E-06 | 3.21E-05 no |
| SLC16A13  | 0.256838879  | 4.776180529  | 2.71E-06 | 3.21E-05 no |
| TBC1D8    | 0.256821187  | 4.775828284  | 2.72E-06 | 3.22E-05 no |
| OMP       | 0.25680135   | 4.775433356  | 2.72E-06 | 3.22E-05 no |
| RAMP2-AS1 | -0.256785205 | -4.775111934 | 2.73E-06 | 3.22E-05 no |
| ATCAY     | -0.256725039 | -4.773914137 | 2.74E-06 | 3.24E-05 no |
| EPB41L4A  | -0.256697603 | -4.773367977 | 2.75E-06 | 3.25E-05 no |
| ZNF510    | -0.256643287 | -4.772286715 | 2.76E-06 | 3.26E-05 no |
| DESI1     | -0.256447762 | -4.768394886 | 2.81E-06 | 3.32E-05 no |
| C22orf32  | -0.2563792   | -4.76703034  | 2.83E-06 | 3.34E-05 no |
| LAMC1     | 0.25637592   | 4.766965051  | 2.83E-06 | 3.34E-05 no |
| ALDH5A1   | -0.256288087 | -4.765217089 | 2.86E-06 | 3.36E-05 no |
| TIGD3     | -0.256270113 | -4.764859412 | 2.86E-06 | 3.37E-05 no |
| STOX2     | -0.256254181 | -4.764542361 | 2.86E-06 | 3.37E-05 no |
| MGAT2     | 0.256216138  | 4.763785326  | 2.88E-06 | 3.38E-05 no |
| SELP      | 0.256200447  | 4.763473082  | 2.88E-06 | 3.38E-05 no |
| TMEM248   | 0.256111939  | 4.761711937  | 2.90E-06 | 3.41E-05 no |
| TRIM61    | 0.256110535  | 4.761684     | 2.90E-06 | 3.41E-05 no |
| GKAP1     | -0.256100732 | -4.761488952 | 2.91E-06 | 3.41E-05 no |
| TMEM110   | 0.256048435  | 4.760448416  | 2.92E-06 | 3.42E-05 no |
| EMP3      | 0.25597219   | 4.758931444  | 2.94E-06 | 3.45E-05 no |
| EMILIN1   | 0.255880477  | 4.757106879  | 2.97E-06 | 3.47E-05 no |

|              |              |              |          |             |
|--------------|--------------|--------------|----------|-------------|
| FAS-AS1      | 0.255817389  | 4.755851859  | 2.98E-06 | 3.49E-05 no |
| COL5A1       | 0.255799647  | 4.755498924  | 2.99E-06 | 3.50E-05 no |
| WDR59        | -0.255698314 | -4.753483265 | 3.02E-06 | 3.53E-05 no |
| ZNF609       | -0.255677622 | -4.753071684 | 3.02E-06 | 3.53E-05 no |
| DNAJC1       | 0.255621265  | 4.751950756  | 3.04E-06 | 3.55E-05 no |
| GCSHP3       | -0.255567952 | -4.750890404 | 3.05E-06 | 3.56E-05 no |
| MAP3K2       | 0.255546964  | 4.750472999  | 3.06E-06 | 3.57E-05 no |
| ORAI1        | 0.255536195  | 4.750258816  | 3.06E-06 | 3.57E-05 no |
| EML4         | 0.255411273  | 4.747774482  | 3.10E-06 | 3.61E-05 no |
| DTD1         | -0.25537897  | -4.747132124 | 3.11E-06 | 3.62E-05 no |
| KBTBD11      | -0.255378788 | -4.747128493 | 3.11E-06 | 3.62E-05 no |
| AKR1B1       | 0.255349012  | 4.746536401  | 3.11E-06 | 3.62E-05 no |
| KIF2A        | -0.255254505 | -4.744657207 | 3.14E-06 | 3.65E-05 no |
| C8orf42      | -0.25524086  | -4.744385886 | 3.14E-06 | 3.66E-05 no |
| CASKIN2      | -0.255121327 | -4.742009303 | 3.18E-06 | 3.69E-05 no |
| ARPP21       | -0.255070843 | -4.741005637 | 3.19E-06 | 3.71E-05 no |
| PPT1         | 0.255022653  | 4.740047623  | 3.21E-06 | 3.72E-05 no |
| SEMA6B       | -0.25492492  | -4.738104788 | 3.24E-06 | 3.75E-05 no |
| SBK1         | -0.254907311 | -4.737754765 | 3.24E-06 | 3.76E-05 no |
| CDC42BPB     | -0.254843696 | -4.736490264 | 3.26E-06 | 3.78E-05 no |
| ENOPH1       | -0.254838112 | -4.736379283 | 3.26E-06 | 3.78E-05 no |
| RCN3         | 0.254829585  | 4.736209793  | 3.27E-06 | 3.78E-05 no |
| SSR4P1       | 0.254730833  | 4.73424703   | 3.30E-06 | 3.81E-05 no |
| PHF2         | -0.254707355 | -4.733780405 | 3.30E-06 | 3.82E-05 no |
| ALG2         | 0.25464294   | 4.732500219  | 3.32E-06 | 3.84E-05 no |
| CLVS1        | -0.25459028  | -4.731453699 | 3.34E-06 | 3.85E-05 no |
| PTCHD2       | -0.254550368 | -4.730660559 | 3.35E-06 | 3.87E-05 no |
| FAM155A      | -0.254540102 | -4.730456562 | 3.35E-06 | 3.87E-05 no |
| ZDHHC18      | 0.254532178  | 4.73029909   | 3.36E-06 | 3.87E-05 no |
| FURIN        | 0.254470846  | 4.729080349  | 3.37E-06 | 3.89E-05 no |
| PPIB         | 0.254429579  | 4.728260363  | 3.39E-06 | 3.90E-05 no |
| TMEM39A      | 0.254427978  | 4.728228544  | 3.39E-06 | 3.90E-05 no |
| TLL12        | -0.2544215   | -4.728099831 | 3.39E-06 | 3.90E-05 no |
| TPSAB1       | 0.254377222  | 4.727220052  | 3.40E-06 | 3.91E-05 no |
| PSMD9        | 0.25437362   | 4.727148482  | 3.41E-06 | 3.91E-05 no |
| IFIT2        | 0.254318102  | 4.726045402  | 3.42E-06 | 3.93E-05 no |
| LOC150568    | -0.254317123 | -4.726025962 | 3.42E-06 | 3.93E-05 no |
| ARHGEF26-AS1 | -0.254290183 | -4.725490707 | 3.43E-06 | 3.94E-05 no |
| ZNF681       | -0.25413729  | -4.722453249 | 3.48E-06 | 3.99E-05 no |
| CLN6         | 0.254076655  | 4.721248753  | 3.50E-06 | 4.01E-05 no |
| ZC3H12B      | -0.25405204  | -4.720759796 | 3.51E-06 | 4.02E-05 no |
| PDGFRB       | 0.254044404  | 4.720608107  | 3.51E-06 | 4.02E-05 no |
| TRMT5        | -0.254036099 | -4.720443148 | 3.51E-06 | 4.02E-05 no |
| KGFLP2       | -0.254019669 | -4.720116787 | 3.52E-06 | 4.02E-05 no |
| TRMT2B       | 0.254003127  | 4.71978821   | 3.52E-06 | 4.03E-05 no |
| HIST1H2BJ    | 0.253937326  | 4.718481232  | 3.54E-06 | 4.05E-05 no |
| MDGA2        | -0.253931345 | -4.718362427 | 3.55E-06 | 4.05E-05 no |
| SLC35F5      | 0.253924904  | 4.718234498  | 3.55E-06 | 4.05E-05 no |
| TMEM106A-AS1 | 0.253909622  | 4.717930974  | 3.55E-06 | 4.05E-05 no |
| ARMC2        | 0.253757994  | 4.714919593  | 3.60E-06 | 4.11E-05 no |
| IFITM4P      | 0.253713703  | 4.714040022  | 3.62E-06 | 4.12E-05 no |

|              |              |              |          |          |    |
|--------------|--------------|--------------|----------|----------|----|
| TNFSF13B     | 0.253691604  | 4.713601175  | 3.62E-06 | 4.13E-05 | no |
| C11orf24     | 0.253673442  | 4.713240502  | 3.63E-06 | 4.13E-05 | no |
| GPNMB        | 0.253646462  | 4.712704746  | 3.64E-06 | 4.14E-05 | no |
| RAI14        | 0.253608989  | 4.711960648  | 3.65E-06 | 4.15E-05 | no |
| HIATL1       | 0.253570958  | 4.711205496  | 3.66E-06 | 4.16E-05 | no |
| RAB33A       | -0.253455047 | -4.708904047 | 3.70E-06 | 4.21E-05 | no |
| FUT9         | -0.253396874 | -4.707749098 | 3.72E-06 | 4.22E-05 | no |
| NAAA         | 0.253395603  | 4.707723853  | 3.72E-06 | 4.22E-05 | no |
| SDC2         | 0.253357934  | 4.706976014  | 3.74E-06 | 4.24E-05 | no |
| HSD17B1      | -0.253329415 | -4.706409841 | 3.75E-06 | 4.25E-05 | no |
| VMP1         | 0.253297991  | 4.705786011  | 3.76E-06 | 4.26E-05 | no |
| TMTC3        | 0.253292072  | 4.70566852   | 3.76E-06 | 4.26E-05 | no |
| PTPRN2       | -0.253276096 | -4.705351371 | 3.76E-06 | 4.26E-05 | no |
| CAMK2N2      | -0.253225    | -4.704337061 | 3.78E-06 | 4.28E-05 | no |
| SLC30A9      | -0.253205636 | -4.70395267  | 3.79E-06 | 4.28E-05 | no |
| TRAF3IP2-AS1 | -0.25316913  | -4.703228025 | 3.80E-06 | 4.29E-05 | no |
| ZC3H7B       | -0.253126801 | -4.702387837 | 3.82E-06 | 4.31E-05 | no |
| DYNC1H1      | -0.253118379 | -4.702220663 | 3.82E-06 | 4.31E-05 | no |
| HERC2        | -0.253112341 | -4.702100817 | 3.82E-06 | 4.31E-05 | no |
| SLC25A23     | -0.253072663 | -4.701313279 | 3.83E-06 | 4.32E-05 | no |
| COL6A1       | 0.253017175  | 4.700211964  | 3.85E-06 | 4.34E-05 | no |
| PVRL2        | 0.252940547  | 4.698691165  | 3.88E-06 | 4.37E-05 | no |
| NAP1L5       | -0.252898906 | -4.697864761 | 3.90E-06 | 4.39E-05 | no |
| COQ10B       | 0.252804495  | 4.695991224  | 3.93E-06 | 4.42E-05 | no |
| FRY          | -0.252780934 | -4.695523692 | 3.94E-06 | 4.43E-05 | no |
| TRIM25       | 0.252662073  | 4.693165183  | 3.98E-06 | 4.47E-05 | no |
| DOCK8        | 0.252640441  | 4.692735973  | 3.99E-06 | 4.48E-05 | no |
| C8orf44      | -0.252637633 | -4.692680267 | 3.99E-06 | 4.48E-05 | no |
| CSRNP3       | -0.252601483 | -4.691963015 | 4.00E-06 | 4.49E-05 | no |
| VIM          | 0.252505506  | 4.690058856  | 4.04E-06 | 4.53E-05 | no |
| CELF3        | -0.252399048 | -4.687946921 | 4.08E-06 | 4.57E-05 | no |
| MORC2-AS1    | -0.25238633  | -4.687694648 | 4.08E-06 | 4.57E-05 | no |
| SLC22A18     | 0.252345521  | 4.686885116  | 4.10E-06 | 4.59E-05 | no |
| SNORA8       | -0.252269673 | -4.685380605 | 4.12E-06 | 4.62E-05 | no |
| TTC28-AS1    | -0.252264243 | -4.685272905 | 4.13E-06 | 4.62E-05 | no |
| HINFP        | -0.252254231 | -4.685074317 | 4.13E-06 | 4.62E-05 | no |
| MAP2         | -0.252231639 | -4.684626219 | 4.14E-06 | 4.62E-05 | no |
| RHBDL3       | -0.25219735  | -4.683946102 | 4.15E-06 | 4.64E-05 | no |
| FLJ10038     | -0.252010578 | -4.680241942 | 4.22E-06 | 4.71E-05 | no |
| FAM211B      | -0.251883447 | -4.677720922 | 4.27E-06 | 4.77E-05 | no |
| HDAC4        | -0.251846466 | -4.676987649 | 4.29E-06 | 4.78E-05 | no |
| CDKL3        | -0.251775864 | -4.675587748 | 4.31E-06 | 4.81E-05 | no |
| FFAR3        | 0.251630829  | 4.67271226   | 4.37E-06 | 4.87E-05 | no |
| ASH1L        | -0.251556589 | -4.67124051  | 4.40E-06 | 4.90E-05 | no |
| HABP4        | -0.251550319 | -4.671116212 | 4.40E-06 | 4.90E-05 | no |
| CLN5         | 0.251536439  | 4.670841065  | 4.41E-06 | 4.90E-05 | no |
| PLEK2        | 0.251424513  | 4.668622402  | 4.45E-06 | 4.95E-05 | no |
| MEIS3        | -0.251313667 | -4.666425343 | 4.50E-06 | 5.00E-05 | no |
| ST8SIA3      | -0.251294576 | -4.666046967 | 4.50E-06 | 5.00E-05 | no |
| TOR1B        | 0.25113092   | 4.66280358   | 4.57E-06 | 5.07E-05 | no |
| SAA2-SAA4    | 0.251129464  | 4.662774711  | 4.57E-06 | 5.07E-05 | no |

|              |              |              |          |             |
|--------------|--------------|--------------|----------|-------------|
| C20orf118    | 0.251105924  | 4.662308235  | 4.58E-06 | 5.08E-05 no |
| CDR1         | -0.251086162 | -4.661916625 | 4.59E-06 | 5.09E-05 no |
| PAR5         | -0.251042829 | -4.661057923 | 4.61E-06 | 5.10E-05 no |
| PDGFB        | 0.251042421  | 4.661049842  | 4.61E-06 | 5.10E-05 no |
| TBXAS1       | 0.251039514  | 4.660992252  | 4.61E-06 | 5.10E-05 no |
| TCN2         | 0.250962193  | 4.659460132  | 4.64E-06 | 5.13E-05 no |
| SEZ6L        | -0.250921884 | -4.658661453 | 4.66E-06 | 5.15E-05 no |
| PNP          | 0.250866777  | 4.657569604  | 4.68E-06 | 5.17E-05 no |
| FAM216A      | -0.250793467 | -4.656117177 | 4.71E-06 | 5.20E-05 no |
| CRAMP1L      | -0.250769271 | -4.655637805 | 4.72E-06 | 5.21E-05 no |
| PDLIM1       | 0.250758231  | 4.65419097   | 4.73E-06 | 5.22E-05 no |
| GATA6        | 0.250709456  | 4.654452834  | 4.75E-06 | 5.24E-05 no |
| PMS2L2       | 0.250701569  | 4.654296579  | 4.75E-06 | 5.24E-05 no |
| B3GALT4      | 0.250666455  | 4.653600986  | 4.77E-06 | 5.25E-05 no |
| GFOD2        | -0.250521321 | -4.650726096 | 4.83E-06 | 5.32E-05 no |
| TRAK1        | -0.250416108 | -4.648642201 | 4.88E-06 | 5.37E-05 no |
| SOGA3        | -0.250382865 | -4.647983798 | 4.89E-06 | 5.38E-05 no |
| LRP4-AS1     | -0.250358541 | -4.647502071 | 4.90E-06 | 5.39E-05 no |
| CACNG7       | -0.250346467 | -4.64726296  | 4.91E-06 | 5.39E-05 no |
| PPP1R12B     | -0.250346393 | -4.647261477 | 4.91E-06 | 5.39E-05 no |
| LOC100506810 | 0.250333511  | 4.647006367  | 4.91E-06 | 5.39E-05 no |
| 38596        | -0.250313285 | -4.646605798 | 4.92E-06 | 5.40E-05 no |
| C8orf48      | 0.250294755  | 4.646238839  | 4.93E-06 | 5.40E-05 no |
| TXNDC12      | 0.250214012  | 4.644639876  | 4.97E-06 | 5.44E-05 no |
| HEBP1        | 0.250176696  | 4.643900948  | 4.98E-06 | 5.46E-05 no |
| FCHSD1       | 0.250139037  | 4.64315524   | 5.00E-06 | 5.47E-05 no |
| CBR4         | -0.250096359 | -4.642310177 | 5.02E-06 | 5.49E-05 no |
| CDKN1B       | -0.250048124 | -4.641355101 | 5.04E-06 | 5.51E-05 no |
| TCAP         | -0.250023917 | -4.640875817 | 5.05E-06 | 5.52E-05 no |
| EPHB1        | -0.249975062 | -4.639908535 | 5.07E-06 | 5.54E-05 no |
| GADD45G      | -0.249945698 | -4.639327183 | 5.09E-06 | 5.55E-05 no |
| LOC388152    | -0.249919599 | -4.638810473 | 5.10E-06 | 5.56E-05 no |
| PPP1R18      | 0.249916726  | 4.638753583  | 5.10E-06 | 5.56E-05 no |
| SMCR5        | -0.249907649 | -4.638573893 | 5.10E-06 | 5.56E-05 no |
| CTNS         | 0.249906769  | 4.638556465  | 5.10E-06 | 5.56E-05 no |
| RIPPLY2      | -0.249883968 | -4.638105062 | 5.11E-06 | 5.57E-05 no |
| CHST13       | 0.249688592  | 4.634237461  | 5.20E-06 | 5.67E-05 no |
| AKAP6        | -0.249678264 | -4.634033039 | 5.21E-06 | 5.67E-05 no |
| ZNF197       | -0.249654949 | -4.633571539 | 5.22E-06 | 5.68E-05 no |
| LPPR3        | -0.249634483 | -4.633166444 | 5.23E-06 | 5.69E-05 no |
| TOMM20       | -0.249625227 | -4.632983236 | 5.23E-06 | 5.69E-05 no |
| TPK1         | 0.249622891  | 4.632937004  | 5.24E-06 | 5.69E-05 no |
| PAFAH2       | 0.249524315  | 4.630985962  | 5.28E-06 | 5.73E-05 no |
| KIAA1244     | -0.249499948 | -4.630503708 | 5.29E-06 | 5.74E-05 no |
| HNRNPA1      | -0.249415232 | -4.62882714  | 5.33E-06 | 5.78E-05 no |
| RAPGEFL1     | -0.249389218 | -4.628312338 | 5.35E-06 | 5.79E-05 no |
| HCG26        | 0.249375796  | 4.628046716  | 5.35E-06 | 5.80E-05 no |
| TUBG2        | -0.249294356 | -4.626435137 | 5.39E-06 | 5.84E-05 no |
| RNFT2        | -0.249255465 | -4.62566559  | 5.41E-06 | 5.85E-05 no |
| ERI1         | 0.249254318  | 4.625642886  | 5.41E-06 | 5.85E-05 no |
| PHTF1        | 0.249233873  | 4.625238341  | 5.42E-06 | 5.86E-05 no |



|              |              |              |          |             |
|--------------|--------------|--------------|----------|-------------|
| PCGF2        | -0.249219929 | -4.624962428 | 5.43E-06 | 5.87E-05 no |
| GPR157       | 0.249183037  | 4.624232471  | 5.45E-06 | 5.88E-05 no |
| GAREML       | -0.249169151 | -4.623957729 | 5.45E-06 | 5.89E-05 no |
| MUC1         | 0.249146388  | 4.623507328  | 5.46E-06 | 5.89E-05 no |
| COL6A2       | 0.249141603  | 4.623412665  | 5.47E-06 | 5.89E-05 no |
| TMEM70       | 0.249128622  | 4.623155837  | 5.47E-06 | 5.90E-05 no |
| PPIC         | 0.249096413  | 4.622518567  | 5.49E-06 | 5.91E-05 no |
| ZNF704       | -0.249092648 | -4.622444075 | 5.49E-06 | 5.91E-05 no |
| FRS3         | -0.249064809 | -4.62189331  | 5.50E-06 | 5.92E-05 no |
| SYDE1        | 0.249057498  | 4.621748665  | 5.51E-06 | 5.92E-05 no |
| CYSLTR1      | 0.249001389  | 4.620638626  | 5.54E-06 | 5.95E-05 no |
| ENDOG        | -0.248961108 | -4.619841741 | 5.56E-06 | 5.97E-05 no |
| TSC22D1-AS1  | -0.248924346 | -4.619114504 | 5.57E-06 | 5.99E-05 no |
| LRAT         | 0.248886427  | 4.618364396  | 5.59E-06 | 6.00E-05 no |
| FFAR4        | 0.248847465  | 4.617593675  | 5.61E-06 | 6.02E-05 no |
| C17orf76-AS1 | -0.248805155 | -4.616756765 | 5.63E-06 | 6.04E-05 no |
| ENPEP        | 0.248779232  | 4.616244012  | 5.65E-06 | 6.05E-05 no |
| CD248        | 0.248737589  | 4.615420338  | 5.67E-06 | 6.07E-05 no |
| SLC1A5       | 0.248675409  | 4.614190497  | 5.70E-06 | 6.10E-05 no |
| TRIM5        | 0.248431632  | 4.609369512  | 5.82E-06 | 6.23E-05 no |
| APLNR        | 0.248418416  | 4.609108172  | 5.83E-06 | 6.24E-05 no |
| LOC285033    | 0.2484066    | 4.608874519  | 5.84E-06 | 6.24E-05 no |
| SBF1         | -0.248350188 | -4.607759071 | 5.87E-06 | 6.27E-05 no |
| SHD          | -0.248209767 | -4.604982676 | 5.94E-06 | 6.35E-05 no |
| MRPL35       | -0.248135582 | -4.603516011 | 5.98E-06 | 6.38E-05 no |
| HAMP         | 0.248107877  | 4.602968298  | 5.99E-06 | 6.40E-05 no |
| MMP19        | 0.248028566  | 4.601400441  | 6.04E-06 | 6.44E-05 no |
| ATXN7L3B     | -0.24797458  | -4.600333262 | 6.07E-06 | 6.47E-05 no |
| PCDH18       | 0.247934082  | 4.599532736  | 6.09E-06 | 6.49E-05 no |
| NIP7         | 0.247844472  | 4.59776153   | 6.14E-06 | 6.54E-05 no |
| ZNF517       | -0.247806913 | -4.597019175 | 6.16E-06 | 6.55E-05 no |
| STAT6        | 0.24778609   | 4.596607624  | 6.17E-06 | 6.56E-05 no |
| CNPY3        | 0.247780286  | 4.596492921  | 6.17E-06 | 6.56E-05 no |
| LRFN1        | -0.247761215 | -4.596115996 | 6.18E-06 | 6.57E-05 no |
| CASQ1        | -0.247743041 | -4.595756822 | 6.19E-06 | 6.58E-05 no |
| NFKB1        | 0.247739469  | 4.595686222  | 6.19E-06 | 6.58E-05 no |
| HBEGF        | 0.247707044  | 4.595045391  | 6.21E-06 | 6.59E-05 no |
| KIAA1161     | -0.247678383 | -4.594478981 | 6.23E-06 | 6.61E-05 no |
| FCN1         | 0.247563872  | 4.592216052  | 6.29E-06 | 6.67E-05 no |
| CXCL11       | 0.247558855  | 4.592116921  | 6.30E-06 | 6.67E-05 no |
| RABGAP1      | -0.247523576 | -4.591419798 | 6.31E-06 | 6.69E-05 no |
| OR2A7        | 0.247458513  | 4.590134177  | 6.35E-06 | 6.72E-05 no |
| HEY1         | -0.247426595 | -4.589503507 | 6.37E-06 | 6.74E-05 no |
| RARB         | 0.247420066  | 4.589374521  | 6.37E-06 | 6.74E-05 no |
| SERPINF1     | 0.247311502  | 4.587229553  | 6.43E-06 | 6.80E-05 no |
| POLR3H       | -0.247309044 | -4.58718098  | 6.44E-06 | 6.80E-05 no |
| LINC00526    | -0.247214282 | -4.585308869 | 6.49E-06 | 6.85E-05 no |
| RASSF8       | 0.247114324  | 4.583334253  | 6.55E-06 | 6.91E-05 no |
| CLNS1A       | -0.247070219 | -4.582463027 | 6.57E-06 | 6.94E-05 no |
| UBN2         | -0.247042387 | -4.581913275 | 6.59E-06 | 6.95E-05 no |
| CMPK2        | 0.247009369  | 4.581261083  | 6.61E-06 | 6.97E-05 no |

|           |              |              |          |             |
|-----------|--------------|--------------|----------|-------------|
| KCNC1     | -0.246992482 | -4.580927544 | 6.62E-06 | 6.97E-05 no |
| TCEA3     | 0.246990763  | 4.580893574  | 6.62E-06 | 6.97E-05 no |
| TMEM132B  | -0.246939758 | -4.579886167 | 6.65E-06 | 7.00E-05 no |
| UQCRC2    | -0.246916819 | -4.579433099 | 6.66E-06 | 7.01E-05 no |
| F2RL1     | 0.246916608  | 4.579428931  | 6.66E-06 | 7.01E-05 no |
| TMEM43    | 0.246888391  | 4.57887164   | 6.68E-06 | 7.02E-05 no |
| BTNL9     | -0.246880673 | -4.578719212 | 6.69E-06 | 7.02E-05 no |
| CUEDC2    | -0.246775582 | -4.57664373  | 6.75E-06 | 7.08E-05 no |
| AARS      | -0.246752106 | -4.576180135 | 6.76E-06 | 7.10E-05 no |
| HNRNPH3   | -0.246660551 | -4.574372153 | 6.82E-06 | 7.15E-05 no |
| NFE2L1    | 0.246595537  | 4.573088378  | 6.86E-06 | 7.19E-05 no |
| YWHAE     | -0.246578029 | -4.572742687 | 6.87E-06 | 7.20E-05 no |
| RWDD2A    | -0.246541001 | -4.572011571 | 6.89E-06 | 7.22E-05 no |
| EFS       | -0.246465601 | -4.570522849 | 6.94E-06 | 7.26E-05 no |
| KLHL22    | -0.246431754 | -4.569854598 | 6.96E-06 | 7.28E-05 no |
| ZNF682    | -0.246348937 | -4.568219583 | 7.01E-06 | 7.33E-05 no |
| TRPM7     | 0.246323886  | 4.567725041  | 7.02E-06 | 7.34E-05 no |
| NF1       | -0.246320396 | -4.567656139 | 7.03E-06 | 7.34E-05 no |
| LRRC32    | 0.246317814  | 4.567605179  | 7.03E-06 | 7.34E-05 no |
| DPYSL4    | -0.246300564 | -4.567264649 | 7.04E-06 | 7.35E-05 no |
| OST4      | 0.246272287  | 4.566706436  | 7.06E-06 | 7.36E-05 no |
| GALNT13   | -0.24626002  | -4.566464277 | 7.06E-06 | 7.37E-05 no |
| DCTN6     | -0.246232182 | -4.565914738 | 7.08E-06 | 7.38E-05 no |
| CAV1      | 0.246221842  | 4.565710638  | 7.09E-06 | 7.38E-05 no |
| GRIA2     | -0.246209408 | -4.565465194 | 7.09E-06 | 7.39E-05 no |
| PFKFB3    | 0.24619693   | 4.565218882  | 7.10E-06 | 7.39E-05 no |
| AATK      | -0.246117774 | -4.563656427 | 7.15E-06 | 7.44E-05 no |
| MPZL1     | 0.246117242  | 4.563645933  | 7.15E-06 | 7.44E-05 no |
| PTPN2     | 0.246114023  | 4.563582403  | 7.15E-06 | 7.44E-05 no |
| SLC25A4   | -0.246028743 | -4.561899187 | 7.21E-06 | 7.49E-05 no |
| EIF4G2    | 0.245940626  | 4.560160091  | 7.27E-06 | 7.54E-05 no |
| WDR25     | -0.245878538 | -4.558934788 | 7.31E-06 | 7.58E-05 no |
| POLD4     | 0.245870099  | 4.558768247  | 7.31E-06 | 7.58E-05 no |
| ASIC1     | -0.2458651   | -4.558669603 | 7.31E-06 | 7.58E-05 no |
| ELAVL3    | -0.245826647 | -4.557910782 | 7.34E-06 | 7.60E-05 no |
| TNFRSF4   | 0.245794803  | 4.557282378  | 7.36E-06 | 7.62E-05 no |
| 38047     | -0.245755191 | -4.556500733 | 7.39E-06 | 7.65E-05 no |
| ANK1      | -0.245731474 | -4.556032737 | 7.40E-06 | 7.66E-05 no |
| KIR3DL2   | 0.245699093  | 4.555393798  | 7.42E-06 | 7.68E-05 no |
| FAM159A   | 0.245689668  | 4.555207821  | 7.43E-06 | 7.68E-05 no |
| GATS      | -0.245649437 | -4.554414014 | 7.45E-06 | 7.70E-05 no |
| CLEC12A   | 0.245625283  | 4.553937433  | 7.47E-06 | 7.71E-05 no |
| HRSP12    | -0.24557462  | -4.552937853 | 7.50E-06 | 7.75E-05 no |
| GNG4      | -0.245529634 | -4.552050299 | 7.53E-06 | 7.77E-05 no |
| S100A8    | 0.245494592  | 4.551358965  | 7.56E-06 | 7.79E-05 no |
| PTPN22    | 0.245454672  | 4.550571406  | 7.58E-06 | 7.82E-05 no |
| LINC00599 | -0.24544332  | -4.550347453 | 7.59E-06 | 7.82E-05 no |
| BANK1     | 0.245430117  | 4.550086987  | 7.60E-06 | 7.83E-05 no |
| SLC46A1   | 0.245357736  | 4.548659134  | 7.65E-06 | 7.87E-05 no |
| CNN2      | 0.245337261  | 4.548255249  | 7.66E-06 | 7.88E-05 no |
| TRIM34    | 0.245218381  | 4.545910317  | 7.74E-06 | 7.96E-05 no |

|              |              |              |          |             |
|--------------|--------------|--------------|----------|-------------|
| VWA1         | 0.245137074  | 4.54430663   | 7.80E-06 | 8.02E-05 no |
| C10orf54     | 0.245087343  | 4.543325819  | 7.83E-06 | 8.05E-05 no |
| CCDC71L      | 0.245082885  | 4.543237896  | 7.84E-06 | 8.05E-05 no |
| LOC100131289 | 0.245050328  | 4.54259581   | 7.86E-06 | 8.07E-05 no |
| ARHGEF9      | -0.245042416 | -4.542439765 | 7.86E-06 | 8.07E-05 no |
| LPHN1        | -0.245029131 | -4.542177764 | 7.87E-06 | 8.07E-05 no |
| SEMA4G       | -0.245002543 | -4.541653417 | 7.89E-06 | 8.09E-05 no |
| FHDC1        | -0.244999739 | -4.541598129 | 7.89E-06 | 8.09E-05 no |
| MYL9         | 0.244897501  | 4.539581987  | 7.96E-06 | 8.15E-05 no |
| NAP1L3       | -0.244811962 | -4.537895257 | 8.02E-06 | 8.21E-05 no |
| DGKB         | -0.244809537 | -4.537847448 | 8.03E-06 | 8.21E-05 no |
| MYT1         | -0.244809399 | -4.537844725 | 8.03E-06 | 8.21E-05 no |
| TMEM196      | -0.244763644 | -4.536942555 | 8.06E-06 | 8.23E-05 no |
| GPR39        | 0.244759601  | 4.536862839  | 8.06E-06 | 8.23E-05 no |
| ATP5G1       | -0.244685263 | -4.535397141 | 8.11E-06 | 8.28E-05 no |
| TLR10        | 0.244667331  | 4.535043582  | 8.13E-06 | 8.29E-05 no |
| PVRL1        | -0.244602299 | -4.533761459 | 8.17E-06 | 8.34E-05 no |
| PHLDA3       | 0.244567398  | 4.533073415  | 8.20E-06 | 8.36E-05 no |
| GCKR         | 0.244546732  | 4.532666008  | 8.21E-06 | 8.37E-05 no |
| HDAC3        | 0.24444121   | 4.530585828  | 8.29E-06 | 8.44E-05 no |
| PTPN18       | 0.24443714   | 4.530505608  | 8.29E-06 | 8.44E-05 no |
| OSBPL10      | 0.244431861  | 4.530401549  | 8.30E-06 | 8.44E-05 no |
| LOC254559    | -0.24440225  | -4.529817853 | 8.32E-06 | 8.46E-05 no |
| ZNF425       | -0.24436563  | -4.529096015 | 8.35E-06 | 8.48E-05 no |
| SUCLG2       | 0.244346672  | 4.528722346  | 8.36E-06 | 8.49E-05 no |
| LOC389765    | -0.244342877 | -4.528647543 | 8.36E-06 | 8.49E-05 no |
| MTMR7        | -0.244275002 | -4.527309697 | 8.41E-06 | 8.54E-05 no |
| CLEC12B      | 0.244233825  | 4.526498129  | 8.44E-06 | 8.57E-05 no |
| MSL1         | -0.244228792 | -4.526398926 | 8.45E-06 | 8.57E-05 no |
| CDK13        | 0.244175709  | 4.525352738  | 8.49E-06 | 8.60E-05 no |
| MDN1         | -0.244163498 | -4.525112091 | 8.49E-06 | 8.61E-05 no |
| C22orf29     | -0.244135187 | -4.524554132 | 8.52E-06 | 8.62E-05 no |
| DGKI         | -0.24407783  | -4.523423787 | 8.56E-06 | 8.66E-05 no |
| C2orf80      | -0.244047761 | -4.522831238 | 8.58E-06 | 8.68E-05 no |
| TNKS         | -0.244007441 | -4.522036687 | 8.61E-06 | 8.71E-05 no |
| SOX2         | -0.243969691 | -4.521292809 | 8.64E-06 | 8.73E-05 no |
| DGCR10       | -0.24395732  | -4.521049056 | 8.65E-06 | 8.74E-05 no |
| NUB1         | 0.243941502  | 4.520737354  | 8.66E-06 | 8.74E-05 no |
| BTN2A3P      | 0.243940534  | 4.52071828   | 8.66E-06 | 8.74E-05 no |
| HOXB6        | 0.243916899  | 4.520252567  | 8.68E-06 | 8.76E-05 no |
| P2RX1        | 0.243881348  | 4.519552077  | 8.71E-06 | 8.78E-05 no |
| TSPAN2       | 0.243844902  | 4.518833954  | 8.73E-06 | 8.80E-05 no |
| CHMP4C       | 0.243713562  | 4.51624628   | 8.84E-06 | 8.90E-05 no |
| ANKRD23      | -0.243681926 | -4.51562303  | 8.86E-06 | 8.92E-05 no |
| RAB8A        | 0.243672615  | 4.515439584  | 8.87E-06 | 8.93E-05 no |
| PTP4A2       | 0.243631853  | 4.514636577  | 8.90E-06 | 8.95E-05 no |
| SIL1         | 0.243559798  | 4.513217129  | 8.96E-06 | 9.01E-05 no |
| ANO1         | 0.243500296  | 4.512045049  | 9.00E-06 | 9.05E-05 no |
| CCNI2        | -0.243457788 | -4.511207738 | 9.04E-06 | 9.08E-05 no |
| SULF1        | 0.243401335  | 4.510095811  | 9.08E-06 | 9.12E-05 no |
| MPP4         | 0.243366494  | 4.509409575  | 9.11E-06 | 9.14E-05 no |

|           |              |              |          |                |
|-----------|--------------|--------------|----------|----------------|
| WDFY3-AS2 | -0.243346473 | -4.509015248 | 9.12E-06 | 9.15E-05 no    |
| NUDT18    | 0.243258845  | 4.507289432  | 9.19E-06 | 9.22E-05 no    |
| CSMD1     | -0.243244517 | -4.507007243 | 9.21E-06 | 9.23E-05 no    |
| PEA15     | -0.24306781  | -4.503527421 | 9.35E-06 | 9.37E-05 no    |
| PRR3      | -0.243027773 | -4.502739062 | 9.38E-06 | 9.39E-05 no    |
| GDAP2     | 0.242920302  | 4.500622971  | 9.47E-06 | 9.48E-05 no    |
| DENND5B   | -0.242891181 | -4.500049612 | 9.49E-06 | 9.50E-05 no    |
| DACT3     | -0.242882799 | -4.499884575 | 9.50E-06 | 9.50E-05 no    |
| KCNH8     | -0.242877161 | -4.499773583 | 9.50E-06 | 9.50E-05 no    |
| FAM3B     | 0.242869003  | 4.49961296   | 9.51E-06 | 9.50E-05 no    |
| HDHD3     | 0.242855241  | 4.499342017  | 9.52E-06 | 9.51E-05 no    |
| ZNF827    | -0.242821291 | -4.498673609 | 9.55E-06 | 9.53E-05 no    |
| ELF4      | 0.242777647  | 4.497814381  | 9.59E-06 | 9.57E-05 no    |
| ADAMTS1   | 0.242670772  | 4.495710454  | 9.68E-06 | 9.65E-05 no    |
| PLBD2     | 0.242616162  | 4.494635467  | 9.72E-06 | 9.69E-05 no    |
| ELFN2     | -0.242589246 | -4.494105641 | 9.75E-06 | 9.71E-05 no    |
| PLXNB2    | 0.242558843  | 4.493507192  | 9.77E-06 | 9.73E-05 no    |
| ZNF37A    | -0.242536723 | -4.493071806 | 9.79E-06 | 9.75E-05 no    |
| MLEC      | 0.242469821  | 4.491754983  | 9.85E-06 | 9.80E-05 no    |
| MTTP      | 0.242402049  | 4.490421125  | 9.91E-06 | 9.85E-05 no    |
| EHMT2     | -0.242386534 | -4.490115773 | 9.92E-06 | 9.86E-05 no    |
| FAM181B   | -0.242379367 | -4.489974733 | 9.93E-06 | 9.86E-05 no    |
| SETD5     | -0.242332868 | -4.489059605 | 9.97E-06 | 9.89E-05 no    |
| SLITRK1   | -0.242330514 | -4.489013273 | 9.97E-06 | 9.89E-05 no    |
| ATRIP     | -0.242312532 | -4.488659397 | 9.98E-06 | 9.91E-05 no    |
| ARL4C     | 0.242257614  | 4.487578651  | 1.00E-05 | 9.95E-05 no    |
| FBLL1     | -0.24218808  | -4.48621032  | 1.01E-05 | 0.000100042 no |
| MEFV      | 0.242178124  | 4.48601441   | 1.01E-05 | 0.000100082 no |
| TMEM59L   | -0.242169466 | -4.485844039 | 1.01E-05 | 0.000100111 no |
| C1orf112  | 0.242157667  | 4.48561187   | 1.01E-05 | 0.000100168 no |
| ZNF397    | -0.24208714  | -4.484224118 | 1.02E-05 | 0.000100737 no |
| C1QTNF6   | 0.242080859  | 4.484100525  | 1.02E-05 | 0.000100746 no |
| PPP2R4    | 0.242069376  | 4.483874582  | 1.02E-05 | 0.0001008 no   |
| WIBG      | 0.241965748  | 4.481835672  | 1.03E-05 | 0.000101593 no |
| POMT1     | -0.241965474 | -4.481830291 | 1.03E-05 | 0.000101593 no |
| MYL12B    | 0.241963177  | 4.481785103  | 1.03E-05 | 0.000101593 no |
| YIPF1     | 0.241900128  | 4.480544669  | 1.03E-05 | 0.000102075 no |
| PRDX2     | -0.241898022 | -4.480503239 | 1.03E-05 | 0.000102075 no |
| DUSP8     | -0.241856623 | -4.479688783 | 1.04E-05 | 0.000102396 no |
| PATL2     | 0.24183681   | 4.479299014  | 1.04E-05 | 0.000102525 no |
| ANGPT1    | 0.241681305  | 4.476240031  | 1.05E-05 | 0.000103869 no |
| ARL6IP5   | 0.241651852  | 4.475660689  | 1.06E-05 | 0.000104087 no |
| MTSS1L    | -0.241555573 | -4.473766976 | 1.07E-05 | 0.000104911 no |
| TNRC6C    | -0.241543872 | -4.473536841 | 1.07E-05 | 0.000104969 no |
| ABAT      | -0.241516631 | -4.473001063 | 1.07E-05 | 0.000105169 no |
| USP22     | -0.241493035 | -4.472536979 | 1.07E-05 | 0.000105336 no |
| RTN2      | -0.241468349 | -4.472051481 | 1.07E-05 | 0.000105465 no |
| EZH1      | -0.241467895 | -4.472042553 | 1.07E-05 | 0.000105465 no |
| KCNH7     | -0.241463101 | -4.471948278 | 1.07E-05 | 0.000105465 no |
| P4HB      | 0.241426369  | 4.471225875  | 1.08E-05 | 0.000105753 no |
| VAX2      | -0.241407133 | -4.470847568 | 1.08E-05 | 0.000105881 no |

|           |              |              |          |             |    |
|-----------|--------------|--------------|----------|-------------|----|
| FLJ37035  | -0.241387616 | -4.470463751 | 1.08E-05 | 0.000105975 | no |
| LPHN3     | -0.241386332 | -4.4704385   | 1.08E-05 | 0.000105975 | no |
| LINC00840 | 0.241306117  | 4.468861073  | 1.09E-05 | 0.000106664 | no |
| GRK5      | 0.241262615  | 4.468005642  | 1.09E-05 | 0.000107018 | no |
| CCNYL1    | 0.241195216  | 4.466680354  | 1.10E-05 | 0.000107595 | no |
| ANPEP     | 0.241172302  | 4.466229806  | 1.10E-05 | 0.000107759 | no |
| VWF       | 0.241158465  | 4.465957722  | 1.10E-05 | 0.000107839 | no |
| ZFP1      | -0.241094516 | -4.464700374 | 1.11E-05 | 0.000108388 | no |
| CDCP1     | 0.241026977  | 4.463372501  | 1.12E-05 | 0.000108973 | no |
| ITPKC     | 0.240884551  | 4.460572528  | 1.13E-05 | 0.000110273 | no |
| HCK       | 0.240682661  | 4.456604041  | 1.15E-05 | 0.000112161 | no |
| DOCK3     | -0.240645391 | -4.455871508 | 1.15E-05 | 0.000112472 | no |
| LOC285696 | -0.240639872 | -4.45576305  | 1.15E-05 | 0.000112474 | no |
| SUZ12P1   | -0.240573614 | -4.454460801 | 1.16E-05 | 0.000113068 | no |
| RBM43     | 0.24050736   | 4.453158722  | 1.17E-05 | 0.000113664 | no |
| SUB1      | -0.240480066 | -4.452622338 | 1.17E-05 | 0.00011388  | no |
| HINT3     | -0.240442191 | -4.451878026 | 1.17E-05 | 0.000114201 | no |
| TRIM6     | 0.240295784  | 4.449001078  | 1.19E-05 | 0.000115592 | no |
| DGCR9     | -0.240291279 | -4.44891255  | 1.19E-05 | 0.000115592 | no |
| SCARNA9   | -0.240281627 | -4.448722903 | 1.19E-05 | 0.000115636 | no |
| HESX1     | 0.240267939  | 4.448453951  | 1.19E-05 | 0.00011572  | no |
| ZCCHC18   | -0.240257393 | -4.448246725 | 1.19E-05 | 0.00011575  | no |
| GUSBP4    | -0.240254441 | -4.448188733 | 1.19E-05 | 0.00011575  | no |
| GPR137    | 0.240189002  | 4.446902966  | 1.20E-05 | 0.000116352 | no |
| NUFIP1    | -0.240068927 | -4.444543884 | 1.21E-05 | 0.000117508 | no |
| BAG6      | -0.240056756 | -4.444304765 | 1.21E-05 | 0.000117578 | no |
| TSG1      | -0.240007136 | -4.443329978 | 1.22E-05 | 0.000118028 | no |
| HSPG2     | 0.239998208  | 4.443154589  | 1.22E-05 | 0.000118066 | no |
| GPR114    | 0.239969611  | 4.442592803  | 1.22E-05 | 0.000118303 | no |
| MB21D2    | -0.239922177 | -4.441661017 | 1.23E-05 | 0.000118734 | no |
| ZNF24     | -0.239857937 | -4.440399135 | 1.23E-05 | 0.000119338 | no |
| CDIP1     | -0.239819198 | -4.439638201 | 1.24E-05 | 0.000119682 | no |
| MMP24     | -0.239773775 | -4.438746021 | 1.24E-05 | 0.000120079 | no |
| SCYL2     | 0.239770285  | 4.43867748   | 1.24E-05 | 0.000120079 | no |
| USP32P1   | -0.239759724 | -4.438470036 | 1.24E-05 | 0.000120134 | no |
| RAB3C     | -0.239710855 | -4.437510204 | 1.25E-05 | 0.000120586 | no |
| MESDC1    | 0.23970324   | 4.43736064   | 1.25E-05 | 0.00012061  | no |
| ATRN      | -0.239658599 | -4.436483897 | 1.26E-05 | 0.00012102  | no |
| BAZ2B     | -0.239589133 | -4.435119649 | 1.26E-05 | 0.00012169  | no |
| RNF208    | -0.239579475 | -4.434929974 | 1.26E-05 | 0.000121736 | no |
| NFKBID    | 0.239556379  | 4.434476403  | 1.27E-05 | 0.000121923 | no |
| AGPAT4    | -0.239500326 | -4.433375655 | 1.27E-05 | 0.000122457 | no |
| ALG1      | 0.239483781  | 4.433050758  | 1.27E-05 | 0.000122529 | no |
| NOVA2     | -0.239483034 | -4.433036081 | 1.27E-05 | 0.000122529 | no |
| NOS3      | 0.239476735  | 4.432912393  | 1.28E-05 | 0.000122541 | no |
| RTKN      | -0.239406019 | -4.43152378  | 1.28E-05 | 0.000123232 | no |
| SLC35A4   | 0.2392832    | 4.429112217  | 1.30E-05 | 0.000124482 | no |
| CDHR1     | -0.239234752 | -4.428160998 | 1.30E-05 | 0.000124945 | no |
| LRRC37A4P | -0.239223818 | -4.427946332 | 1.30E-05 | 0.000125006 | no |
| FAM66C    | -0.2391702   | -4.42689366  | 1.31E-05 | 0.000125526 | no |
| FAM46C    | 0.239124459  | 4.425995665  | 1.31E-05 | 0.000125963 | no |

|              |              |              |          |             |    |
|--------------|--------------|--------------|----------|-------------|----|
| ZFP14        | -0.239112296 | -4.42575689  | 1.32E-05 | 0.000126038 | no |
| ZDHHC1       | 0.239106357  | 4.4256403    | 1.32E-05 | 0.000126046 | no |
| LXN          | 0.239094963  | 4.425416623  | 1.32E-05 | 0.000126113 | no |
| CHST6        | 0.239081048  | 4.425143454  | 1.32E-05 | 0.000126208 | no |
| LMAN1        | 0.239067213  | 4.424871863  | 1.32E-05 | 0.000126301 | no |
| SPTY2D1      | 0.23903481   | 4.424235762  | 1.32E-05 | 0.000126596 | no |
| BMF          | 0.239016113  | 4.423868739  | 1.33E-05 | 0.000126743 | no |
| ST6GAL2      | -0.238989788 | -4.423351982 | 1.33E-05 | 0.000126973 | no |
| WASF1        | -0.238978838 | -4.423137033 | 1.33E-05 | 0.000127036 | no |
| ACOT12       | 0.238955651  | 4.422681886  | 1.33E-05 | 0.000127232 | no |
| CHPT1        | 0.238926291  | 4.422105593  | 1.34E-05 | 0.000127495 | no |
| CD19         | 0.238903297  | 4.421654239  | 1.34E-05 | 0.00012769  | no |
| MOB3A        | 0.238845753  | 4.420524768  | 1.35E-05 | 0.000128234 | no |
| HMGCS1       | -0.238843283 | -4.42047629  | 1.35E-05 | 0.000128234 | no |
| KLF12        | -0.238827061 | -4.420157907 | 1.35E-05 | 0.00012831  | no |
| XKR7         | -0.238826066 | -4.420138369 | 1.35E-05 | 0.00012831  | no |
| RPS6KA6      | -0.238787989 | -4.419391025 | 1.35E-05 | 0.000128672 | no |
| RPS3         | -0.238745217 | -4.418551569 | 1.36E-05 | 0.000129038 | no |
| SOX6         | -0.238744512 | -4.418537729 | 1.36E-05 | 0.000129038 | no |
| KCNJ5        | 0.238736678  | 4.418383994  | 1.36E-05 | 0.000129067 | no |
| RAB11FIP1    | 0.238706587  | 4.417793424  | 1.36E-05 | 0.000129343 | no |
| FZD4         | 0.238612434  | 4.415945697  | 1.37E-05 | 0.0001303   | no |
| SLC2A13      | -0.238607147 | -4.415841939 | 1.37E-05 | 0.0001303   | no |
| MEX3A        | -0.238604943 | -4.415798689 | 1.37E-05 | 0.0001303   | no |
| SPTBN4       | -0.238581904 | -4.415346571 | 1.38E-05 | 0.000130499 | no |
| TADA1        | -0.238470864 | -4.413167657 | 1.39E-05 | 0.000131666 | no |
| ACO2         | -0.238467493 | -4.413101521 | 1.39E-05 | 0.000131666 | no |
| RPN1         | 0.238453807  | 4.412832979  | 1.39E-05 | 0.000131762 | no |
| MAOB         | 0.238438023  | 4.412523272  | 1.39E-05 | 0.000131844 | no |
| TMEM62       | 0.238436293  | 4.412489321  | 1.39E-05 | 0.000131844 | no |
| EHHADH       | 0.238350463  | 4.410805272  | 1.40E-05 | 0.000132756 | no |
| LTC4S        | 0.238307232  | 4.409957085  | 1.41E-05 | 0.000133189 | no |
| FAM110B      | -0.238230449 | -4.408450668 | 1.42E-05 | 0.000134006 | no |
| SPAG9        | -0.238155472 | -4.406979785 | 1.43E-05 | 0.000134808 | no |
| LPCAT3       | 0.238123201  | 4.406346726  | 1.43E-05 | 0.00013512  | no |
| SCG3         | -0.23806559  | -4.405216615 | 1.44E-05 | 0.000135727 | no |
| MRPS25       | -0.23803183  | -4.404554379 | 1.44E-05 | 0.000136059 | no |
| SLC10A7      | 0.238020996  | 4.404341874  | 1.44E-05 | 0.000136125 | no |
| PLA2G4F      | 0.237941081  | 4.402774363  | 1.45E-05 | 0.000136973 | no |
| MAPKAPK3     | 0.23793791   | 4.402712169  | 1.46E-05 | 0.000136973 | no |
| RCAN1        | 0.237916339  | 4.402289064  | 1.46E-05 | 0.000137165 | no |
| LRRC37B      | -0.237899709 | -4.401962894 | 1.46E-05 | 0.0001373   | no |
| PAPSS2       | 0.237879066  | 4.401558013  | 1.46E-05 | 0.000137482 | no |
| CLEC18B      | 0.237847675  | 4.400942355  | 1.47E-05 | 0.00013779  | no |
| LOC100505806 | 0.237840758  | 4.400806698  | 1.47E-05 | 0.000137811 | no |
| NREP         | -0.237832334 | -4.40064148  | 1.47E-05 | 0.00013785  | no |
| PAMR1        | 0.237785735  | 4.39972757   | 1.47E-05 | 0.000138338 | no |
| FAM65C       | 0.2377743    | 4.399503312  | 1.48E-05 | 0.000138412 | no |
| TICAM2       | 0.237738564  | 4.39880247   | 1.48E-05 | 0.000138774 | no |
| LOC100128993 | 0.237732815  | 4.398689739  | 1.48E-05 | 0.000138781 | no |
| ATF5         | 0.237713008  | 4.398301294  | 1.48E-05 | 0.000138955 | no |

|              |              |              |          |             |    |
|--------------|--------------|--------------|----------|-------------|----|
| PC           | -0.237689879 | -4.397847733 | 1.49E-05 | 0.000139169 | no |
| GRID2        | -0.237658766 | -4.39723759  | 1.49E-05 | 0.000139477 | no |
| DGCR6        | -0.237637764 | -4.396825755 | 1.49E-05 | 0.000139666 | no |
| LOC730091    | 0.237583623  | 4.395764099  | 1.50E-05 | 0.000140251 | no |
| LYSMD1       | -0.237550486 | -4.395114324 | 1.50E-05 | 0.000140586 | no |
| SERPINE1     | 0.237529859  | 4.394709864  | 1.51E-05 | 0.000140772 | no |
| MLL          | -0.237508125 | -4.394283699 | 1.51E-05 | 0.000140971 | no |
| CLIC4        | 0.23750086   | 4.394141264  | 1.51E-05 | 0.000140997 | no |
| LOC100507266 | -0.237383559 | -4.391841366 | 1.53E-05 | 0.00014235  | no |
| ELL          | 0.237350265  | 4.391188623  | 1.53E-05 | 0.000142692 | no |
| HCN3         | -0.237339701 | -4.390981504 | 1.53E-05 | 0.000142759 | no |
| HDAC1        | 0.237218291  | 4.388601357  | 1.55E-05 | 0.000144178 | no |
| ABCC8        | -0.237191065 | -4.388067642 | 1.55E-05 | 0.000144449 | no |
| IRF9         | 0.237184342  | 4.387935841  | 1.55E-05 | 0.000144469 | no |
| NRP1         | 0.237121996  | 4.386713722  | 1.56E-05 | 0.000145174 | no |
| TNR          | -0.237106297 | -4.386405979 | 1.56E-05 | 0.000145305 | no |
| P2RX4        | 0.237092998  | 4.386145304  | 1.56E-05 | 0.000145406 | no |
| WNT4         | 0.237075133  | 4.385795132  | 1.57E-05 | 0.000145564 | no |
| CCDC94       | -0.237046507 | -4.385234022 | 1.57E-05 | 0.000145856 | no |
| METTL24      | 0.236971715  | 4.383768071  | 1.58E-05 | 0.000146722 | no |
| LOC100506472 | -0.236944063 | -4.383226106 | 1.58E-05 | 0.000146942 | no |
| MAP3K6       | 0.236943937  | 4.383223638  | 1.58E-05 | 0.000146942 | no |
| DYNLT3       | 0.236933852  | 4.383025982  | 1.58E-05 | 0.000146981 | no |
| PLIN2        | 0.236930651  | 4.382963236  | 1.59E-05 | 0.000146981 | no |
| TRIM9        | -0.236906096 | -4.382482    | 1.59E-05 | 0.000147224 | no |
| ARVCF        | -0.236889864 | -4.382163858 | 1.59E-05 | 0.000147363 | no |
| ZNF207       | 0.236882233  | 4.382014318  | 1.59E-05 | 0.000147395 | no |
| AKR1B10      | 0.236803888  | 4.380478918  | 1.60E-05 | 0.000148315 | no |
| NSUN6        | -0.236796229 | -4.380328814 | 1.60E-05 | 0.000148348 | no |
| GUF1         | -0.236786031 | -4.380128975 | 1.60E-05 | 0.000148412 | no |
| DYRK3        | 0.236773835  | 4.379889963  | 1.61E-05 | 0.000148502 | no |
| VAMP2        | -0.236746258 | -4.379349552 | 1.61E-05 | 0.000148786 | no |
| RGS13        | 0.236684415  | 4.378137684  | 1.62E-05 | 0.000149504 | no |
| PMM2         | 0.236614568  | 4.376769017  | 1.63E-05 | 0.000150328 | no |
| GDAP1        | -0.236587455 | -4.37623776  | 1.63E-05 | 0.00015061  | no |
| DNPEP        | 0.236576511  | 4.376023323  | 1.63E-05 | 0.000150685 | no |
| EFNA3        | -0.236560552 | -4.375710633 | 1.64E-05 | 0.000150824 | no |
| TMEM35       | -0.236447849 | -4.373502463 | 1.65E-05 | 0.000152207 | no |
| TMEM102      | 0.236420446  | 4.372965588  | 1.66E-05 | 0.000152495 | no |
| FLJ39639     | 0.236405616  | 4.372675046  | 1.66E-05 | 0.000152621 | no |
| CABP4        | 0.236377204  | 4.372118414  | 1.66E-05 | 0.000152862 | no |
| PKIA         | -0.236376909 | -4.372112637 | 1.66E-05 | 0.000152862 | no |
| FAM156A      | -0.236335978 | -4.371310757 | 1.67E-05 | 0.000153272 | no |
| PRKCE        | -0.236335218 | -4.371295882 | 1.67E-05 | 0.000153272 | no |
| NT5M         | -0.236323061 | -4.371057714 | 1.67E-05 | 0.000153364 | no |
| GNPDA1       | 0.236259745  | 4.369817381  | 1.68E-05 | 0.000154059 | no |
| CYP4F11      | 0.236259571  | 4.369813957  | 1.68E-05 | 0.000154059 | no |
| CTIF         | -0.236216474 | -4.368969741 | 1.68E-05 | 0.00015454  | no |
| SNX8         | 0.236212665  | 4.368895138  | 1.68E-05 | 0.00015454  | no |
| FBN1         | 0.236150523  | 4.367677878  | 1.69E-05 | 0.000155289 | no |
| KLHL23       | -0.236132624 | -4.367327283 | 1.70E-05 | 0.000155458 | no |

|              |              |              |          |             |    |
|--------------|--------------|--------------|----------|-------------|----|
| PIEZ01       | 0.236090091  | 4.36649418   | 1.70E-05 | 0.000155952 | no |
| SLC16A14     | -0.236075865 | -4.366215556 | 1.70E-05 | 0.000156073 | no |
| GOLGA7B      | -0.236050114 | -4.365711183 | 1.71E-05 | 0.000156347 | no |
| HM13         | 0.23604442   | 4.365599648  | 1.71E-05 | 0.000156356 | no |
| PARVA        | 0.235997658  | 4.364683784  | 1.72E-05 | 0.000156909 | no |
| GRIPAP1      | -0.235978283 | -4.364304317 | 1.72E-05 | 0.000157099 | no |
| COQ2         | 0.235943553  | 4.363624133  | 1.72E-05 | 0.000157494 | no |
| ULK4         | 0.235935624  | 4.363468856  | 1.72E-05 | 0.000157533 | no |
| SYT15        | -0.235816259 | -4.361131253 | 1.74E-05 | 0.000159034 | no |
| CUL7         | 0.235813421  | 4.361075677  | 1.74E-05 | 0.000159034 | no |
| RRP7B        | -0.23580554  | -4.360921348 | 1.74E-05 | 0.000159072 | no |
| MAPK8IP1     | -0.235737609 | -4.359591108 | 1.75E-05 | 0.00015992  | no |
| KAT6B        | -0.235717101 | -4.359189539 | 1.76E-05 | 0.000160129 | no |
| YPEL4        | -0.235705561 | -4.35896358  | 1.76E-05 | 0.000160218 | no |
| CPLX1        | -0.235611782 | -4.357127335 | 1.77E-05 | 0.000161368 | no |
| CLEC16A      | -0.235610795 | -4.357108006 | 1.77E-05 | 0.000161368 | no |
| STX1B        | -0.235569401 | -4.356297546 | 1.78E-05 | 0.000161865 | no |
| PRR16        | 0.235561306  | 4.356139043  | 1.78E-05 | 0.000161907 | no |
| MAPK8IP2     | -0.235549483 | -4.355907574 | 1.78E-05 | 0.000162    | no |
| LENG9        | 0.235473416  | 4.3544183    | 1.79E-05 | 0.000162917 | no |
| FEM1B        | -0.235472558 | -4.354401507 | 1.79E-05 | 0.000162917 | no |
| CLCF1        | 0.235464351  | 4.354240844  | 1.79E-05 | 0.000162961 | no |
| GPR31        | 0.235451377  | 4.35398683   | 1.80E-05 | 0.000163071 | no |
| ALG12        | 0.235363494  | 4.352266371  | 1.81E-05 | 0.000164215 | no |
| GABPB1-AS1   | -0.235333374 | -4.351676745 | 1.81E-05 | 0.000164563 | no |
| KLHDC1       | -0.235315915 | -4.351334972 | 1.82E-05 | 0.000164736 | no |
| NCAPH2       | -0.235309379 | -4.351207036 | 1.82E-05 | 0.000164758 | no |
| HTR7P1       | 0.235300753  | 4.351038173  | 1.82E-05 | 0.000164808 | no |
| FOXS1        | 0.235268988  | 4.350416379  | 1.82E-05 | 0.00016518  | no |
| BECN1        | 0.235257077  | 4.350183218  | 1.83E-05 | 0.000165277 | no |
| GPBP1L1      | 0.235244292  | 4.349932966  | 1.83E-05 | 0.000165385 | no |
| PPFIA3       | -0.235192822 | -4.348925494 | 1.84E-05 | 0.000166035 | no |
| COL5A2       | 0.235157704  | 4.348238111  | 1.84E-05 | 0.000166457 | no |
| RNF146       | -0.235147392 | -4.34803627  | 1.84E-05 | 0.000166531 | no |
| CLVS2        | -0.2351301   | -4.347697821 | 1.85E-05 | 0.000166704 | no |
| PXN-AS1      | -0.235115811 | -4.347418148 | 1.85E-05 | 0.000166835 | no |
| GRID2IP      | -0.235081211 | -4.346740942 | 1.85E-05 | 0.000167252 | no |
| CLPTMIL      | 0.23503309   | 4.345799142  | 1.86E-05 | 0.00016786  | no |
| ZNF91        | -0.234968869 | -4.34454228  | 1.87E-05 | 0.0001687   | no |
| DAGLA        | -0.234962345 | -4.344414616 | 1.87E-05 | 0.000168722 | no |
| HSPB1        | 0.234836459  | 4.341951101  | 1.89E-05 | 0.000170448 | no |
| FN3K         | -0.234784582 | -4.340935974 | 1.90E-05 | 0.000171122 | no |
| C19orf40     | 0.234727209  | 4.339813346  | 1.91E-05 | 0.000171844 | no |
| NDUFA10      | -0.234724554 | -4.339761387 | 1.91E-05 | 0.000171844 | no |
| DICER1-AS1   | -0.234689401 | -4.33907357  | 1.92E-05 | 0.000172227 | no |
| LOC100128288 | -0.234684955 | -4.338986576 | 1.92E-05 | 0.000172227 | no |
| PLEKHA7      | 0.234683164  | 4.338951541  | 1.92E-05 | 0.000172227 | no |
| CAMP         | 0.234673325  | 4.338759032  | 1.92E-05 | 0.000172298 | no |
| LRRC1        | -0.234629468 | -4.337900939 | 1.93E-05 | 0.000172862 | no |
| WDR17        | -0.234525441 | -4.335865676 | 1.94E-05 | 0.000174307 | no |
| FAM86B1      | 0.234465129  | 4.334685764  | 1.95E-05 | 0.00017512  | no |



|              |              |              |          |             |    |
|--------------|--------------|--------------|----------|-------------|----|
| RAB6B        | -0.234458391 | -4.334553947 | 1.95E-05 | 0.000175146 | no |
| TRAPPC3      | 0.234423883  | 4.333878884  | 1.96E-05 | 0.000175581 | no |
| MX1          | 0.234318734  | 4.331821998  | 1.98E-05 | 0.000177065 | no |
| LRPPRC       | -0.234312659 | -4.331703171 | 1.98E-05 | 0.000177081 | no |
| PPP1R9A      | -0.234248293 | -4.330444139 | 1.99E-05 | 0.000177967 | no |
| MTHFD2L      | -0.234241037 | -4.330302219 | 1.99E-05 | 0.000178001 | no |
| DISP2        | -0.234224582 | -4.329980359 | 1.99E-05 | 0.000178173 | no |
| PDLIM4       | 0.234156543  | 4.328649598  | 2.00E-05 | 0.000179118 | no |
| SCD5         | -0.234141476 | -4.328354898 | 2.01E-05 | 0.00017927  | no |
| CGN          | -0.234133733 | -4.328203476 | 2.01E-05 | 0.000179312 | no |
| PPM1E        | -0.234125943 | -4.328051107 | 2.01E-05 | 0.000179355 | no |
| CCDC122      | 0.234036213  | 4.326296214  | 2.02E-05 | 0.000180635 | no |
| GTF2F2       | -0.234000353 | -4.325594918 | 2.03E-05 | 0.000181104 | no |
| C1orf85      | 0.233985713  | 4.325308616  | 2.03E-05 | 0.000181224 | no |
| OXA1L        | 0.233982246  | 4.325240828  | 2.03E-05 | 0.000181224 | no |
| ATG7         | 0.233976048  | 4.325119606  | 2.03E-05 | 0.000181224 | no |
| SFXN1        | -0.233972669 | -4.325053533 | 2.03E-05 | 0.000181224 | no |
| ITGB3        | 0.23396386   | 4.324881274  | 2.04E-05 | 0.000181282 | no |
| LRRC8A       | -0.233949568 | -4.324601775 | 2.04E-05 | 0.000181424 | no |
| TRAF3IP1     | 0.233936611  | 4.324348407  | 2.04E-05 | 0.000181546 | no |
| TPD52L2      | 0.233868414  | 4.323014817  | 2.05E-05 | 0.000182512 | no |
| POPDC2       | 0.233811699  | 4.321905816  | 2.06E-05 | 0.000183305 | no |
| TOP2B        | -0.233786738 | -4.321417748 | 2.07E-05 | 0.000183613 | no |
| FAM129B      | 0.233748578  | 4.320671602  | 2.07E-05 | 0.000184125 | no |
| SLC30A7      | 0.233711727  | 4.319951095  | 2.08E-05 | 0.000184617 | no |
| CTHRC1       | 0.233693498  | 4.319594673  | 2.08E-05 | 0.000184823 | no |
| KIF3C        | -0.233556407 | -4.316914434 | 2.11E-05 | 0.000186879 | no |
| WNT3         | -0.233491462 | -4.315644797 | 2.12E-05 | 0.00018782  | no |
| HRASLS5      | 0.23347939   | 4.315408808  | 2.12E-05 | 0.000187932 | no |
| SAP18        | -0.233451318 | -4.314860051 | 2.13E-05 | 0.000188296 | no |
| SACS         | -0.233445088 | -4.314738255 | 2.13E-05 | 0.000188317 | no |
| BRWD1        | -0.233431821 | -4.314478909 | 2.13E-05 | 0.000188448 | no |
| RAP2A        | -0.233418141 | -4.314211499 | 2.13E-05 | 0.000188586 | no |
| LOC100507632 | 0.23338857   | 4.313633463  | 2.14E-05 | 0.000188975 | no |
| LAMB2        | 0.233253757  | 4.310998348  | 2.16E-05 | 0.000191039 | no |
| BICC1        | 0.233222341  | 4.310384324  | 2.17E-05 | 0.000191462 | no |
| TRIM56       | 0.233120182  | 4.308387706  | 2.19E-05 | 0.000192952 | no |
| TRIP4        | 0.233119693  | 4.308378147  | 2.19E-05 | 0.000192952 | no |
| GRB2         | 0.232976741  | 4.305584508  | 2.21E-05 | 0.000195189 | no |
| RBM8A        | -0.232915567 | -4.304389111 | 2.22E-05 | 0.000196108 | no |
| MYCBP        | 0.23286558   | 4.303412366  | 2.23E-05 | 0.000196846 | no |
| SELPLG       | 0.232726614  | 4.300697128  | 2.26E-05 | 0.000199011 | no |
| SVOP         | -0.232724596 | -4.300657704 | 2.26E-05 | 0.000199011 | no |
| RNPS1        | -0.23269201  | -4.300021047 | 2.26E-05 | 0.000199471 | no |
| DOK1         | 0.232655073  | 4.299299414  | 2.27E-05 | 0.000200004 | no |
| ARSD         | 0.23254366   | 4.297122842  | 2.29E-05 | 0.000201749 | no |
| PLP2         | 0.232541015  | 4.297071183  | 2.29E-05 | 0.000201749 | no |
| OXER1        | 0.232458258  | 4.295454557  | 2.31E-05 | 0.000203061 | no |
| FUS          | -0.232406546 | -4.294444432 | 2.32E-05 | 0.000203854 | no |
| PEX19        | -0.232364516 | -4.293623471 | 2.33E-05 | 0.000204479 | no |
| ZNF785       | -0.232359997 | -4.293535199 | 2.33E-05 | 0.000204479 | no |

|              |              |              |          |             |    |
|--------------|--------------|--------------|----------|-------------|----|
| LOXL2        | 0.232344419  | 4.293230932  | 2.33E-05 | 0.000204598 | no |
| CKAP4        | 0.232343186  | 4.293206846  | 2.33E-05 | 0.000204598 | no |
| ARHGDI1      | 0.232260023  | 4.291582536  | 2.35E-05 | 0.000205935 | no |
| ERRFI1       | 0.232245501  | 4.291298903  | 2.35E-05 | 0.000206099 | no |
| ELF3         | 0.232230491  | 4.291005747  | 2.35E-05 | 0.000206273 | no |
| C10orf128    | 0.232182621  | 4.290070835  | 2.36E-05 | 0.000207011 | no |
| SHC2         | -0.232103183 | -4.288519456 | 2.38E-05 | 0.000208217 | no |
| A2M-AS1      | 0.232099668  | 4.288450809  | 2.38E-05 | 0.000208217 | no |
| FOXC1        | 0.232098103  | 4.288420241  | 2.38E-05 | 0.000208217 | no |
| CFLAR-AS1    | 0.232074158  | 4.287952624  | 2.38E-05 | 0.000208547 | no |
| RPL38        | -0.232068447 | -4.287841107 | 2.39E-05 | 0.000208561 | no |
| ILF3-AS1     | -0.23202942  | -4.287078974 | 2.39E-05 | 0.000209154 | no |
| DKFZP434H168 | -0.231946423 | -4.285458278 | 2.41E-05 | 0.000210516 | no |
| SMIM8        | -0.231927049 | -4.285079989 | 2.41E-05 | 0.000210769 | no |
| C1orf127     | 0.231875322  | 4.284069971  | 2.42E-05 | 0.000211591 | no |
| LINC00607    | 0.231850865  | 4.283592423  | 2.43E-05 | 0.000211935 | no |
| ZBTB3        | -0.231789506 | -4.282394407 | 2.44E-05 | 0.000212932 | no |
| ARHGEF26     | -0.231721776 | -4.281072057 | 2.46E-05 | 0.000214045 | no |
| GABBR2       | -0.231655955 | -4.279787038 | 2.47E-05 | 0.000215131 | no |
| SPINT1       | 0.231545808  | 4.277636798  | 2.49E-05 | 0.000216931 | no |
| PPFIA1       | -0.231545765 | -4.277635946 | 2.49E-05 | 0.000216931 | no |
| MAPT-IT1     | -0.231517447 | -4.277083168 | 2.50E-05 | 0.000217353 | no |
| ELL3         | 0.231506745  | 4.276874256  | 2.50E-05 | 0.000217457 | no |
| GAD1         | -0.2314354   | -4.275481634 | 2.51E-05 | 0.000218659 | no |
| HPSE         | 0.231385384  | 4.274505377  | 2.52E-05 | 0.000219479 | no |
| ADAMTS2      | 0.231310002  | 4.273034069  | 2.54E-05 | 0.000220765 | no |
| PCBP4        | -0.231279749 | -4.272443605 | 2.55E-05 | 0.00022123  | no |
| AP2B1        | -0.231109063 | -4.269112523 | 2.58E-05 | 0.000224288 | no |
| RND1         | -0.231023553 | -4.267443894 | 2.60E-05 | 0.000225725 | no |
| SHANK2       | -0.231022165 | -4.267416798 | 2.60E-05 | 0.000225725 | no |
| MTMR4        | -0.23101068  | -4.267192703 | 2.60E-05 | 0.00022581  | no |
| FGF20        | 0.231007852  | 4.267137505  | 2.60E-05 | 0.00022581  | no |
| IL1RAPL1     | -0.230935921 | -4.265733961 | 2.62E-05 | 0.000227067 | no |
| PTPRJ        | 0.230889156  | 4.264821486  | 2.63E-05 | 0.000227785 | no |
| DCAF16       | -0.230885453 | -4.264749241 | 2.63E-05 | 0.000227785 | no |
| SLC9A1       | 0.230883142  | 4.264704137  | 2.63E-05 | 0.000227785 | no |
| CAMK2G       | -0.230837404 | -4.263811745 | 2.64E-05 | 0.000228556 | no |
| SLC25A48     | -0.230804142 | -4.26316278  | 2.65E-05 | 0.000229072 | no |
| THNSL1       | -0.230796006 | -4.263004049 | 2.65E-05 | 0.000229072 | no |
| UBR3         | -0.23079551  | -4.26299437  | 2.65E-05 | 0.000229072 | no |
| WDR20        | -0.230785906 | -4.262806998 | 2.65E-05 | 0.000229107 | no |
| ZNF333       | -0.230782766 | -4.262745732 | 2.65E-05 | 0.000229107 | no |
| MMD2         | -0.230779089 | -4.262674001 | 2.65E-05 | 0.000229107 | no |
| PTPN4        | -0.230746421 | -4.262036666 | 2.66E-05 | 0.000229634 | no |
| C11orf95     | -0.230718502 | -4.261491985 | 2.67E-05 | 0.000230072 | no |
| CDS2         | -0.230711056 | -4.261346718 | 2.67E-05 | 0.000230122 | no |
| C8orf46      | -0.230694248 | -4.261018809 | 2.67E-05 | 0.000230273 | no |
| CCDC90A      | -0.23069341  | -4.261002473 | 2.67E-05 | 0.000230273 | no |
| LOC728377    | 0.230632126  | 4.259806933  | 2.69E-05 | 0.000231349 | no |
| GTPBP1       | -0.230615929 | -4.259490963 | 2.69E-05 | 0.000231566 | no |
| AMER2        | -0.230499121 | -4.257212416 | 2.72E-05 | 0.000233717 | no |

|              |              |              |          |             |    |
|--------------|--------------|--------------|----------|-------------|----|
| NLE1         | -0.230443466 | -4.256126845 | 2.73E-05 | 0.000234699 | no |
| LOC729852    | 0.230438389  | 4.25602781   | 2.73E-05 | 0.000234704 | no |
| DOK6         | -0.230433528 | -4.255933008 | 2.73E-05 | 0.000234704 | no |
| HAS3         | 0.230365746  | 4.254610955  | 2.75E-05 | 0.000235926 | no |
| GCHFR        | 0.230323149  | 4.253780148  | 2.76E-05 | 0.000236662 | no |
| TM2D2        | 0.230303662  | 4.253400099  | 2.76E-05 | 0.000236948 | no |
| ANKEF1       | 0.23029244   | 4.253181235  | 2.76E-05 | 0.000237    | no |
| ZNF418       | -0.230291356 | -4.253160091 | 2.76E-05 | 0.000237    | no |
| THOP1        | -0.230228422 | -4.25193272  | 2.78E-05 | 0.000238063 | no |
| ZMYM6        | 0.230227425  | 4.251913279  | 2.78E-05 | 0.000238063 | no |
| ATP5S        | -0.230219871 | -4.251765955 | 2.78E-05 | 0.000238063 | no |
| GPR34        | 0.230217765  | 4.25172489   | 2.78E-05 | 0.000238063 | no |
| RPRD2        | -0.230096472 | -4.249359553 | 2.81E-05 | 0.000240359 | no |
| MRPS28       | -0.230069499 | -4.248833578 | 2.81E-05 | 0.000240798 | no |
| LOC93622     | -0.230022374 | -4.247914676 | 2.83E-05 | 0.000241639 | no |
| AKAP11       | -0.229921019 | -4.245938407 | 2.85E-05 | 0.000243568 | no |
| NCAM1        | -0.229808812 | -4.243750718 | 2.88E-05 | 0.000245731 | no |
| PAFAH1B1     | -0.229768892 | -4.242972453 | 2.89E-05 | 0.000246441 | no |
| GIN1         | -0.229756283 | -4.242726627 | 2.89E-05 | 0.000246599 | no |
| PTPRA        | -0.229734222 | -4.242296553 | 2.89E-05 | 0.000246949 | no |
| KIAA1549L    | -0.229711729 | -4.241858056 | 2.90E-05 | 0.000247308 | no |
| SALL2        | -0.229658445 | -4.240819313 | 2.91E-05 | 0.000248296 | no |
| TFE3         | 0.22959496   | 4.239581773  | 2.93E-05 | 0.000249497 | no |
| CDH22        | -0.229547575 | -4.238658112 | 2.94E-05 | 0.000250372 | no |
| TNFRSF12A    | 0.229505503  | 4.237838044  | 2.95E-05 | 0.00025114  | no |
| ORAI3        | 0.229454795  | 4.23684968   | 2.96E-05 | 0.000252089 | no |
| TBX19        | 0.229396094  | 4.235705557  | 2.97E-05 | 0.000253207 | no |
| CUX2         | -0.229374604 | -4.235286714 | 2.98E-05 | 0.000253554 | no |
| PON1         | -0.229277861 | -4.233401262 | 3.00E-05 | 0.000255476 | no |
| PSEN2        | 0.22921667   | 4.232208762  | 3.02E-05 | 0.000256661 | no |
| CPXM2        | 0.229102469  | 4.229983355  | 3.05E-05 | 0.000258896 | no |
| SSTR2        | -0.229101398 | -4.229962477 | 3.05E-05 | 0.000258896 | no |
| TOP1P1       | 0.229072874  | 4.229406667  | 3.05E-05 | 0.0002594   | no |
| APC          | -0.229063841 | -4.229230647 | 3.06E-05 | 0.00025949  | no |
| LOC100506314 | 0.229051199  | 4.228984322  | 3.06E-05 | 0.000259657 | no |
| MLL5         | -0.228968022 | -4.227363637 | 3.08E-05 | 0.000261331 | no |
| PTPN1        | 0.228959177  | 4.227191289  | 3.08E-05 | 0.000261418 | no |
| NMT2         | -0.22894402  | -4.226895975 | 3.09E-05 | 0.00026164  | no |
| NKIRAS1      | -0.228904205 | -4.226120233 | 3.10E-05 | 0.000262392 | no |
| ATOX8        | -0.228899354 | -4.22602572  | 3.10E-05 | 0.000262393 | no |
| TCEAL5       | -0.228878999 | -4.225629144 | 3.10E-05 | 0.000262727 | no |
| TPBG         | 0.228862615  | 4.225309945  | 3.11E-05 | 0.000262977 | no |
| CCDC101      | -0.228826542 | -4.224607151 | 3.12E-05 | 0.000263652 | no |
| GALNS        | 0.228798796  | 4.224066615  | 3.12E-05 | 0.000264148 | no |
| NID2         | 0.228789388  | 4.223883332  | 3.13E-05 | 0.000264248 | no |
| NPRL3        | -0.22878223  | -4.223743876 | 3.13E-05 | 0.000264299 | no |
| POM121L9P    | 0.228760902  | 4.223328386  | 3.13E-05 | 0.000264657 | no |
| B3GNT1       | -0.228741406 | -4.222948575 | 3.14E-05 | 0.000264976 | no |
| APBA1        | -0.228718768 | -4.222507569 | 3.14E-05 | 0.000265363 | no |
| PLEKHM3      | -0.228682651 | -4.221803991 | 3.15E-05 | 0.000266045 | no |
| KSR1         | -0.228610305 | -4.220394727 | 3.17E-05 | 0.000267521 | no |

|              |               |               |           |              |    |
|--------------|---------------|---------------|-----------|--------------|----|
| DHRS3        | 0. 228593264  | 4. 220062779  | 3. 18E-05 | 0. 000267789 | no |
| TMEFF2       | -0. 228492039 | -4. 218091096 | 3. 20E-05 | 0. 000269912 | no |
| ARL10        | -0. 228481792 | -4. 217891518 | 3. 21E-05 | 0. 000270032 | no |
| PLS3         | 0. 228476472  | 4. 217787898  | 3. 21E-05 | 0. 000270044 | no |
| CBX3P2       | -0. 228461504 | -4. 217496369 | 3. 21E-05 | 0. 000270269 | no |
| WDFY3        | -0. 228455159 | -4. 21737279  | 3. 21E-05 | 0. 000270303 | no |
| CEP112       | 0. 228427621  | 4. 216836427  | 3. 22E-05 | 0. 000270807 | no |
| BPIFB4       | 0. 228414004  | 4. 216571222  | 3. 22E-05 | 0. 000271003 | no |
| CCDC8        | 0. 22838253   | 4. 21595822   | 3. 23E-05 | 0. 000271595 | no |
| ARF4         | 0. 228346763  | 4. 215261635  | 3. 24E-05 | 0. 000272251 | no |
| SCFD1        | -0. 228338974 | -4. 215109954 | 3. 24E-05 | 0. 000272251 | no |
| FAM19A5      | -0. 228338723 | -4. 215105065 | 3. 24E-05 | 0. 000272251 | no |
| GRID1        | -0. 228219977 | -4. 21279255  | 3. 28E-05 | 0. 0002748   | no |
| RP1-177G6. 2 | -0. 228184193 | -4. 212095717 | 3. 29E-05 | 0. 000275497 | no |
| QPRT         | 0. 228173839  | 4. 211894097  | 3. 29E-05 | 0. 000275622 | no |
| ZNF436       | 0. 228050099  | 4. 209484612  | 3. 32E-05 | 0. 00027831  | no |
| NOVA1        | -0. 228045537 | -4. 209395791 | 3. 32E-05 | 0. 00027831  | no |
| HRH3         | -0. 228022711 | -4. 208951345 | 3. 33E-05 | 0. 000278664 | no |
| SGSH         | 0. 228020417  | 4. 208906678  | 3. 33E-05 | 0. 000278664 | no |
| PDIA4        | 0. 228008806  | 4. 208680598  | 3. 33E-05 | 0. 00027882  | no |
| GJD3         | 0. 227962352  | 4. 207776125  | 3. 35E-05 | 0. 00027977  | no |
| MIR600HG     | -0. 227953044 | -4. 207594895 | 3. 35E-05 | 0. 00027978  | no |
| ADCYAP1R1    | -0. 227952407 | -4. 207582491 | 3. 35E-05 | 0. 00027978  | no |
| RPP30        | -0. 2279412   | -4. 207364299 | 3. 35E-05 | 0. 000279927 | no |
| EPHA10       | -0. 227894294 | -4. 206451068 | 3. 36E-05 | 0. 000280892 | no |
| LINC00671    | -0. 22784528  | -4. 205496825 | 3. 38E-05 | 0. 000281908 | no |
| LAMB1        | 0. 227820299  | 4. 205010493  | 3. 38E-05 | 0. 000282373 | no |
| XAB2         | -0. 227788193 | -4. 204385452 | 3. 39E-05 | 0. 000283004 | no |
| KIAA1147     | -0. 2277257   | -4. 203168892 | 3. 41E-05 | 0. 00028434  | no |
| PDZD8        | -0. 227686315 | -4. 202402217 | 3. 42E-05 | 0. 00028483  | no |
| EFNB2        | 0. 227684856  | 4. 202373811  | 3. 42E-05 | 0. 00028483  | no |
| SNURF        | -0. 227683854 | -4. 20235431  | 3. 42E-05 | 0. 00028483  | no |
| B3GALT2      | -0. 227683218 | -4. 20234193  | 3. 42E-05 | 0. 00028483  | no |
| LEPREL1      | 0. 227680821  | 4. 202295264  | 3. 42E-05 | 0. 00028483  | no |
| MOAP1        | -0. 227654745 | -4. 201787677 | 3. 43E-05 | 0. 000285326 | no |
| NUDT10       | -0. 227627793 | -4. 201263045 | 3. 44E-05 | 0. 000285843 | no |
| EPB41L2      | 0. 227615822  | 4. 201030023  | 3. 44E-05 | 0. 000286011 | no |
| KLF15        | -0. 22755105  | -4. 199769259 | 3. 46E-05 | 0. 000287414 | no |
| SAA4         | 0. 227466928  | 4. 198131938  | 3. 48E-05 | 0. 000289279 | no |
| ACSF2        | 0. 22744444   | 4. 197694263  | 3. 49E-05 | 0. 000289697 | no |
| TAGLN        | 0. 227420606  | 4. 197230384  | 3. 50E-05 | 0. 000290143 | no |
| LINC00630    | -0. 227416069 | -4. 197142077 | 3. 50E-05 | 0. 000290143 | no |
| HAPLN3       | 0. 227392007  | 4. 19667379   | 3. 50E-05 | 0. 0002906   | no |
| MTHFR        | 0. 227374999  | 4. 196342784  | 3. 51E-05 | 0. 000290891 | no |
| JMJD6        | -0. 227292517 | -4. 194737573 | 3. 53E-05 | 0. 000292738 | no |
| VASH1        | 0. 227277354  | 4. 1944425    | 3. 54E-05 | 0. 000292903 | no |
| BRI3         | 0. 227276119  | 4. 194418467  | 3. 54E-05 | 0. 000292903 | no |
| TCEB3C       | 0. 227219943  | 4. 193325285  | 3. 55E-05 | 0. 000294132 | no |
| AKAP8L       | -0. 227214836 | -4. 193225905 | 3. 56E-05 | 0. 000294141 | no |
| MRFAP1L1     | -0. 227204168 | -4. 193018306 | 3. 56E-05 | 0. 000294283 | no |
| TAGLN2       | 0. 22718992   | 4. 192741052  | 3. 56E-05 | 0. 000294511 | no |

|          |              |              |          |             |    |
|----------|--------------|--------------|----------|-------------|----|
| SPSB1    | 0.227145977  | 4.191885975  | 3.58E-05 | 0.000295452 | no |
| TMEM156  | 0.227121436  | 4.191408448  | 3.58E-05 | 0.000295867 | no |
| RGMB     | -0.227119287 | -4.191366627 | 3.58E-05 | 0.000295867 | no |
| BSN      | -0.227104416 | -4.191077263 | 3.59E-05 | 0.000296111 | no |
| DDX6     | -0.227065306 | -4.190316286 | 3.60E-05 | 0.00029694  | no |
| SPRN     | -0.227017902 | -4.189393936 | 3.61E-05 | 0.000297869 | no |
| SCAMP1   | -0.227017466 | -4.189385443 | 3.61E-05 | 0.000297869 | no |
| FAN1     | -0.226999855 | -4.189042806 | 3.62E-05 | 0.000298181 | no |
| NFIX     | -0.226988936 | -4.18883035  | 3.62E-05 | 0.000298332 | no |
| NUDT11   | -0.226918293 | -4.187455941 | 3.64E-05 | 0.000299934 | no |
| GPR125   | -0.226913062 | -4.18735416  | 3.64E-05 | 0.000299947 | no |
| TLX1NB   | -0.226898229 | -4.187065584 | 3.65E-05 | 0.000300194 | no |
| PLAC8    | 0.226885853  | 4.186824801  | 3.65E-05 | 0.000300381 | no |
| LDHA     | -0.226839762 | -4.185928129 | 3.67E-05 | 0.000301392 | no |
| HSD17B11 | 0.226827162  | 4.185683003  | 3.67E-05 | 0.000301585 | no |
| CAMTA1   | -0.226785858 | -4.184879482 | 3.68E-05 | 0.000302483 | no |
| PET112   | -0.226777684 | -4.18472047  | 3.68E-05 | 0.000302568 | no |
| LACTB2   | 0.226768981  | 4.184551172  | 3.69E-05 | 0.000302667 | no |
| IL13RA2  | 0.226748612  | 4.184154929  | 3.69E-05 | 0.000303052 | no |
| ACVRL1   | 0.226730402  | 4.183800684  | 3.70E-05 | 0.000303385 | no |
| SPATA20  | 0.226713707  | 4.18347592   | 3.70E-05 | 0.00030368  | no |
| ITGAX    | 0.226704873  | 4.18330408   | 3.71E-05 | 0.000303782 | no |
| GALNT10  | 0.226660527  | 4.182441452  | 3.72E-05 | 0.000304761 | no |
| CCNDBP1  | 0.226648542  | 4.182208333  | 3.72E-05 | 0.000304942 | no |
| LAMTOR2  | 0.226639212  | 4.182026845  | 3.73E-05 | 0.000305057 | no |
| CLEC4D   | 0.22658844   | 4.181039278  | 3.74E-05 | 0.000306199 | no |
| MYO1E    | 0.226524046  | 4.179786786  | 3.76E-05 | 0.000307686 | no |
| IRAK2    | 0.226489668  | 4.179118147  | 3.77E-05 | 0.000308428 | no |
| ULBP2    | 0.226458243  | 4.178506971  | 3.78E-05 | 0.000309037 | no |
| PELO     | 0.226455955  | 4.178462468  | 3.78E-05 | 0.000309037 | no |
| COL3A1   | 0.226410501  | 4.177578452  | 3.80E-05 | 0.000309949 | no |
| PRPF6    | -0.226410248 | -4.177573525 | 3.80E-05 | 0.000309949 | no |
| GNG11    | 0.226399609  | 4.17736661   | 3.80E-05 | 0.000310098 | no |
| C6orf136 | -0.226341981 | -4.176245872 | 3.82E-05 | 0.000311432 | no |
| TOB1-AS1 | -0.226326254 | -4.175940042 | 3.82E-05 | 0.000311711 | no |
| TMEM189  | 0.226313317  | 4.17568844   | 3.83E-05 | 0.00031192  | no |
| PAWR     | 0.226287551  | 4.175187389  | 3.83E-05 | 0.000312453 | no |
| SPIRE1   | -0.226220929 | -4.173891835 | 3.85E-05 | 0.000314025 | no |
| USP54    | -0.22620095  | -4.173503348 | 3.86E-05 | 0.000314415 | no |
| ALS2CL   | 0.226139761  | 4.172313517  | 3.88E-05 | 0.000315857 | no |
| DERL2    | 0.226089778  | 4.171341653  | 3.90E-05 | 0.000317018 | no |
| HSD17B7  | 0.226082406  | 4.171198298  | 3.90E-05 | 0.000317087 | no |
| ADAM1A   | -0.22605304  | -4.170627335 | 3.91E-05 | 0.000317634 | no |
| NEK6     | 0.226051777  | 4.17060277   | 3.91E-05 | 0.000317634 | no |
| ANKRD13D | 0.226036564  | 4.170306987  | 3.91E-05 | 0.000317905 | no |
| FAM43A   | 0.226015096  | 4.169889584  | 3.92E-05 | 0.000318337 | no |
| IRF4     | 0.225969732  | 4.169007591  | 3.93E-05 | 0.000319387 | no |
| ZNF438   | 0.225926022  | 4.168157789  | 3.95E-05 | 0.000320398 | no |
| SH3BGR1  | 0.225880645  | 4.167275591  | 3.96E-05 | 0.000321455 | no |
| GNAL     | -0.225862743 | -4.166927575 | 3.97E-05 | 0.000321799 | no |
| SEMA6A   | -0.225721042 | -4.164172939 | 4.01E-05 | 0.000325384 | no |

|              |              |              |          |             |    |
|--------------|--------------|--------------|----------|-------------|----|
| CCDC73       | -0.225640342 | -4.162604277 | 4.04E-05 | 0.00032739  | no |
| MORF4L2-AS1  | -0.225628111 | -4.162366544 | 4.04E-05 | 0.00032759  | no |
| SLC15A4      | 0.225572041  | 4.161276721  | 4.06E-05 | 0.000328953 | no |
| KIAA1143     | -0.225566747 | -4.161173811 | 4.06E-05 | 0.00032897  | no |
| SYNGAP1      | -0.225539204 | -4.160638474 | 4.07E-05 | 0.000329578 | no |
| CLLU10S      | 0.22549629   | 4.159804399  | 4.09E-05 | 0.000330598 | no |
| UNC5A        | -0.225434934 | -4.158611935 | 4.11E-05 | 0.000332115 | no |
| OMA1         | 0.225391716  | 4.157772022  | 4.12E-05 | 0.00033315  | no |
| LOC283761    | -0.22535897  | -4.157135643 | 4.13E-05 | 0.000333906 | no |
| TAGLN3       | -0.225353281 | -4.157025085 | 4.13E-05 | 0.000333934 | no |
| LSM14B       | -0.225346351 | -4.156890407 | 4.14E-05 | 0.000333995 | no |
| FADD         | 0.225330912  | 4.156590377  | 4.14E-05 | 0.000334286 | no |
| FAIM2        | -0.22525711  | -4.155156186 | 4.17E-05 | 0.000336063 | no |
| MANEA        | 0.22525589   | 4.155132483  | 4.17E-05 | 0.000336063 | no |
| TMLHE        | -0.225200301 | -4.154052281 | 4.19E-05 | 0.000337446 | no |
| UBASH3B      | 0.225142605  | 4.152931196  | 4.21E-05 | 0.000338892 | no |
| AADAT        | -0.225131926 | -4.15272369  | 4.21E-05 | 0.000338961 | no |
| LOC389791    | -0.225130784 | -4.152701497 | 4.21E-05 | 0.000338961 | no |
| ACBD7        | -0.225112705 | -4.152350225 | 4.22E-05 | 0.000339328 | no |
| MCTP2        | 0.22505622   | 4.151252725  | 4.23E-05 | 0.000340749 | no |
| GTDC2        | -0.225018368 | -4.150517284 | 4.25E-05 | 0.000341601 | no |
| PCDHB9       | -0.22501595  | -4.1504703   | 4.25E-05 | 0.000341601 | no |
| KCNN2        | -0.224970483 | -4.149586938 | 4.26E-05 | 0.000342726 | no |
| FAS          | 0.224961924  | 4.149420656  | 4.27E-05 | 0.000342834 | no |
| RNU6ATAC     | -0.224951482 | -4.149217791 | 4.27E-05 | 0.000342945 | no |
| CSDC2        | -0.22494865  | -4.149162763 | 4.27E-05 | 0.000342945 | no |
| CD34         | 0.224916784  | 4.14854369   | 4.28E-05 | 0.000343697 | no |
| HERC1        | -0.224898023 | -4.148179197 | 4.29E-05 | 0.000344053 | no |
| CRTC1        | -0.224894666 | -4.148113994 | 4.29E-05 | 0.000344053 | no |
| CCL8         | 0.224794618  | 4.146170394  | 4.33E-05 | 0.000346706 | no |
| TEF          | -0.224728919 | -4.144894162 | 4.35E-05 | 0.000348415 | no |
| HOXB5        | 0.224649622  | 4.143353869  | 4.38E-05 | 0.000350469 | no |
| LRRC55       | 0.224646567  | 4.143294522  | 4.38E-05 | 0.000350469 | no |
| SERTAD3      | 0.224606079  | 4.142508095  | 4.39E-05 | 0.000351481 | no |
| KLHDC5       | -0.224483488 | -4.140127084 | 4.43E-05 | 0.000354831 | no |
| CLEC4E       | 0.224418293  | 4.138860912  | 4.46E-05 | 0.000356562 | no |
| PPP2R2B      | -0.22432476  | -4.137044493 | 4.49E-05 | 0.000359118 | no |
| ATP5G3       | 0.224312829  | 4.13681281   | 4.50E-05 | 0.000359328 | no |
| HIAT1        | 0.224269856  | 4.135978307  | 4.51E-05 | 0.000360437 | no |
| RGS16        | 0.224212378  | 4.134862201  | 4.53E-05 | 0.000361969 | no |
| LOC100129034 | 0.224138152  | 4.133420926  | 4.56E-05 | 0.000363997 | no |
| NUP37        | 0.223969407  | 4.130144611  | 4.62E-05 | 0.000368761 | no |
| FGFR1        | 0.223966796  | 4.130093933  | 4.62E-05 | 0.000368761 | no |
| WHSC1L1      | -0.223932807 | -4.129434044 | 4.64E-05 | 0.000369631 | no |
| ZDHHC7       | 0.223895957  | 4.128718652  | 4.65E-05 | 0.000370587 | no |
| TECTA        | -0.223828254 | -4.127404332 | 4.67E-05 | 0.000372465 | no |
| RAPGEF2      | -0.223775962 | -4.126389219 | 4.69E-05 | 0.000373891 | no |
| P2RX5-TAX1BF | -0.223738777 | -4.125667408 | 4.71E-05 | 0.000374867 | no |
| CYR61        | 0.22366659   | 4.124266198  | 4.74E-05 | 0.000376901 | no |
| CYSLTR2      | 0.223641318  | 4.123775656  | 4.74E-05 | 0.000377525 | no |
| HBQ1         | -0.223623207 | -4.123424117 | 4.75E-05 | 0.000377933 | no |

|              |               |               |           |              |    |
|--------------|---------------|---------------|-----------|--------------|----|
| NANS         | 0. 223580994  | 4. 122604795  | 4. 77E-05 | 0. 000379072 | no |
| TCTEX1D4     | 0. 223502384  | 4. 121079068  | 4. 80E-05 | 0. 000381324 | no |
| PPP3CA       | -0. 223463408 | -4. 120322627 | 4. 81E-05 | 0. 000382373 | no |
| PFDN6        | -0. 223443336 | -4. 11993309  | 4. 82E-05 | 0. 000382846 | no |
| GPR137C      | -0. 223433498 | -4. 119742167 | 4. 82E-05 | 0. 000383006 | no |
| MY07A        | 0. 223378607  | 4. 118676906  | 4. 85E-05 | 0. 00038455  | no |
| MEX3B        | -0. 223312479 | -4. 117393628 | 4. 87E-05 | 0. 000386446 | no |
| LOC643837    | 0. 223261215  | 4. 116398829  | 4. 89E-05 | 0. 00038789  | no |
| PMVK         | -0. 223226904 | -4. 115733044 | 4. 90E-05 | 0. 000388811 | no |
| SLC24A1      | 0. 223212157  | 4. 115446883  | 4. 91E-05 | 0. 000389126 | no |
| ATG13        | -0. 223203908 | -4. 11528683  | 4. 91E-05 | 0. 00038924  | no |
| ZNF781       | -0. 223189145 | -4. 115000363 | 4. 92E-05 | 0. 000389555 | no |
| FBLN1        | 0. 223148973  | 4. 114220882  | 4. 94E-05 | 0. 000390664 | no |
| AKAP2        | 0. 223114917  | 4. 113560093  | 4. 95E-05 | 0. 000391584 | no |
| EHD2         | 0. 223108836  | 4. 113442096  | 4. 95E-05 | 0. 00039163  | no |
| UBE3C        | 0. 223090871  | 4. 113093528  | 4. 96E-05 | 0. 000392048 | no |
| COL1A1       | 0. 22300533   | 4. 111433879  | 4. 99E-05 | 0. 000394577 | no |
| FAM126B      | -0. 223001147 | -4. 111352715 | 4. 99E-05 | 0. 000394577 | no |
| FAM84B       | -0. 222980327 | -4. 110948794 | 5. 00E-05 | 0. 000395088 | no |
| FAM151B      | 0. 22297512   | 4. 110847757  | 5. 00E-05 | 0. 000395107 | no |
| PCBP2        | -0. 222945526 | -4. 110273629 | 5. 02E-05 | 0. 000395897 | no |
| HIST2H2BF    | 0. 222903832  | 4. 109464739  | 5. 03E-05 | 0. 00039707  | no |
| DNAJC10      | 0. 222892185  | 4. 109238792  | 5. 04E-05 | 0. 000397294 | no |
| GAS6-AS1     | 0. 222860975  | 4. 108633343  | 5. 05E-05 | 0. 000398138 | no |
| SYNPO        | 0. 222850451  | 4. 108429184  | 5. 05E-05 | 0. 000398327 | no |
| USP53        | 0. 222711606  | 4. 105735825  | 5. 11E-05 | 0. 000402615 | no |
| DUSP2        | 0. 222671971  | 4. 104967027  | 5. 13E-05 | 0. 000403741 | no |
| SLC30A5      | 0. 222622077  | 4. 10399925   | 5. 15E-05 | 0. 000405202 | no |
| WDR1         | 0. 222591502  | 4. 103406229  | 5. 16E-05 | 0. 000405983 | no |
| MMRN1        | 0. 222588734  | 4. 103352538  | 5. 16E-05 | 0. 000405983 | no |
| ABCC3        | 0. 222514252  | 4. 101907943  | 5. 19E-05 | 0. 00040825  | no |
| BAX          | 0. 222506918  | 4. 101765716  | 5. 19E-05 | 0. 000408339 | no |
| ZDHHC17      | -0. 222487777 | -4. 101394488 | 5. 20E-05 | 0. 000408813 | no |
| UBC          | 0. 222466721  | 4. 100986121  | 5. 21E-05 | 0. 000409349 | no |
| CALML4       | 0. 222443845  | 4. 100542465  | 5. 22E-05 | 0. 000409946 | no |
| SMPD1        | 0. 222423566  | 4. 100149182  | 5. 23E-05 | 0. 000410459 | no |
| NKAIN4       | -0. 222312209 | -4. 097989679 | 5. 28E-05 | 0. 000413963 | no |
| RILP         | 0. 22228015   | 4. 097367998  | 5. 29E-05 | 0. 000414869 | no |
| IL18R1       | 0. 222165416  | 4. 095143232  | 5. 34E-05 | 0. 000418521 | no |
| TMEM63C      | -0. 222158592 | -4. 095010908 | 5. 34E-05 | 0. 000418595 | no |
| SPTAN1       | -0. 22214153  | -4. 094680083 | 5. 35E-05 | 0. 000419011 | no |
| HUS1         | 0. 222133482  | 4. 094524045  | 5. 35E-05 | 0. 000419126 | no |
| SPATS2       | -0. 222093775 | -4. 093754146 | 5. 37E-05 | 0. 000420245 | no |
| MUT          | -0. 222090794 | -4. 093696359 | 5. 37E-05 | 0. 000420245 | no |
| M1AP         | 0. 222078847  | 4. 09346471   | 5. 37E-05 | 0. 000420492 | no |
| LOC100287314 | 0. 222068508  | 4. 093264255  | 5. 38E-05 | 0. 000420587 | no |
| HIPK3        | 0. 222066849  | 4. 093232096  | 5. 38E-05 | 0. 000420587 | no |
| SRGAP3       | -0. 222011767 | -4. 092164149 | 5. 40E-05 | 0. 000422279 | no |
| SIGLEC11     | 0. 22200047   | 4. 09194512   | 5. 41E-05 | 0. 000422505 | no |
| APLF         | 0. 221958223  | 4. 091126062  | 5. 43E-05 | 0. 000423771 | no |
| KCNIP3       | -0. 221942391 | -4. 09081913  | 5. 43E-05 | 0. 000424151 | no |

|              |              |              |          |             |    |
|--------------|--------------|--------------|----------|-------------|----|
| NOG          | -0.22182219  | -4.088488915 | 5.49E-05 | 0.000428065 | no |
| TECPR2       | -0.221771951 | -4.087515038 | 5.51E-05 | 0.00042962  | no |
| ARRDC3       | 0.221733256  | 4.086764961  | 5.52E-05 | 0.000430786 | no |
| CLEC11A      | 0.221725976  | 4.086623853  | 5.53E-05 | 0.000430855 | no |
| ASGR1        | -0.221722084 | -4.086548409 | 5.53E-05 | 0.000430855 | no |
| IMPDH1       | 0.221716491  | 4.086439994  | 5.53E-05 | 0.00043089  | no |
| FAT3         | -0.221707085 | -4.086257674 | 5.54E-05 | 0.000431056 | no |
| IL17D        | -0.221645002 | -4.085054291 | 5.56E-05 | 0.000432928 | no |
| MROH8        | -0.221643356 | -4.085022388 | 5.56E-05 | 0.000432928 | no |
| RHOF         | 0.221618071  | 4.084532307  | 5.58E-05 | 0.00043364  | no |
| JPH4         | -0.221551002 | -4.083232361 | 5.60E-05 | 0.000435712 | no |
| TCEA2        | -0.221548885 | -4.083191331 | 5.61E-05 | 0.000435712 | no |
| TUB          | -0.221454514 | -4.081362345 | 5.65E-05 | 0.000438826 | no |
| MANF         | 0.221399929  | 4.0803045    | 5.67E-05 | 0.00044057  | no |
| TTC33        | -0.221363157 | -4.079591881 | 5.69E-05 | 0.000441696 | no |
| KIAA1211     | -0.221332938 | -4.079006273 | 5.70E-05 | 0.000442575 | no |
| CD84         | 0.221328952  | 4.078929038  | 5.70E-05 | 0.000442575 | no |
| TMEM198      | -0.2213234   | -4.078821435 | 5.71E-05 | 0.000442583 | no |
| TRIP6        | 0.221319637  | 4.078748513  | 5.71E-05 | 0.000442583 | no |
| GK5          | -0.221277974 | -4.077941161 | 5.73E-05 | 0.000443828 | no |
| HIC2         | -0.221275059 | -4.077884675 | 5.73E-05 | 0.000443828 | no |
| EPHX3        | 0.221266765  | 4.077723966  | 5.73E-05 | 0.000443873 | no |
| ECHDC3       | 0.221264695  | 4.07768385   | 5.73E-05 | 0.000443873 | no |
| BHLHE40-AS1  | 0.221251403  | 4.077426275  | 5.74E-05 | 0.000444181 | no |
| ARHGAP33     | -0.221211857 | -4.076659999 | 5.76E-05 | 0.000445414 | no |
| SPHKAP       | -0.221149959 | -4.07546062  | 5.79E-05 | 0.000447441 | no |
| GABRB3       | -0.221104888 | -4.074587341 | 5.81E-05 | 0.000448879 | no |
| SART1        | -0.22094126  | -4.071417129 | 5.88E-05 | 0.000454566 | no |
| LOC100288346 | -0.220935504 | -4.071305621 | 5.88E-05 | 0.000454609 | no |
| FAM114A2     | 0.220898991  | 4.070598266  | 5.90E-05 | 0.00045576  | no |
| LHPP         | -0.220814163 | -4.068954961 | 5.94E-05 | 0.000458663 | no |
| MCF2L2       | -0.220793158 | -4.068548065 | 5.95E-05 | 0.00045926  | no |
| EPM2AIP1     | -0.220775513 | -4.068206257 | 5.96E-05 | 0.000459736 | no |
| ATP8A1       | -0.220740962 | -4.067536975 | 5.98E-05 | 0.000460828 | no |
| SUV420H1     | -0.220684773 | -4.066448573 | 6.00E-05 | 0.000462712 | no |
| AVEN         | 0.22063542   | 4.065492632  | 6.03E-05 | 0.00046424  | no |
| FLII         | 0.220633985  | 4.065464847  | 6.03E-05 | 0.00046424  | no |
| ITGA1        | 0.220591662  | 4.064645096  | 6.05E-05 | 0.000465627 | no |
| KIAA1467     | -0.220580849 | -4.064435656 | 6.05E-05 | 0.000465858 | no |
| ZSCAN2       | -0.220518227 | -4.063222796 | 6.08E-05 | 0.000468    | no |
| KRT86        | 0.220511552  | 4.063093509  | 6.09E-05 | 0.000468079 | no |
| RIOK3        | 0.220497819  | 4.062827541  | 6.09E-05 | 0.000468419 | no |
| TMEM41A      | 0.220477962  | 4.062442976  | 6.10E-05 | 0.000468986 | no |
| ATP8B3       | 0.220441484  | 4.061736508  | 6.12E-05 | 0.00047017  | no |
| SLC9A3R2     | 0.220348988  | 4.059945229  | 6.16E-05 | 0.000473445 | no |
| CHRM4        | -0.220251446 | -4.058056366 | 6.21E-05 | 0.000476931 | no |
| ASXL3        | -0.220226319 | -4.057569805 | 6.22E-05 | 0.000477539 | no |
| BRPF3        | -0.220226235 | -4.057568183 | 6.22E-05 | 0.000477539 | no |
| EVC          | 0.220215817  | 4.057366446  | 6.23E-05 | 0.000477761 | no |
| PHF17        | -0.220210605 | -4.057265536 | 6.23E-05 | 0.000477786 | no |
| ANKMY1       | 0.220198674  | 4.057034497  | 6.24E-05 | 0.000477901 | no |



|              |              |              |          |             |    |
|--------------|--------------|--------------|----------|-------------|----|
| CHRNA6       | 0.220198508  | 4.057031296  | 6.24E-05 | 0.000477901 | no |
| TFAP4        | -0.220185107 | -4.05677181  | 6.24E-05 | 0.000478236 | no |
| ZC3H6        | -0.220165293 | -4.056388144 | 6.25E-05 | 0.000478813 | no |
| GAB3         | 0.220118845  | 4.055488793  | 6.28E-05 | 0.000480398 | no |
| SUGP1        | -0.220112872 | -4.055373151 | 6.28E-05 | 0.000480453 | no |
| NDUFB9       | -0.220096466 | -4.055055487 | 6.29E-05 | 0.000480903 | no |
| TMPRSS5      | -0.220055024 | -4.054253114 | 6.31E-05 | 0.000482304 | no |
| MTRNR2L2     | -0.220032875 | -4.053824271 | 6.32E-05 | 0.0004828   | no |
| FAM196B      | -0.220029084 | -4.053750868 | 6.32E-05 | 0.0004828   | no |
| LOC100506384 | -0.220028452 | -4.053738633 | 6.32E-05 | 0.0004828   | no |
| HMGN5        | -0.2200158   | -4.053493694 | 6.33E-05 | 0.00048311  | no |
| HIST1H1C     | 0.219974251  | 4.052689275  | 6.35E-05 | 0.0004845   | no |
| ZADH2        | -0.219970282 | -4.052612433 | 6.35E-05 | 0.0004845   | no |
| RTCA         | 0.219898718  | 4.051226975  | 6.39E-05 | 0.000487065 | no |
| LMTK2        | -0.219844973 | -4.050186518 | 6.41E-05 | 0.000488957 | no |
| RP2          | 0.219801377  | 4.049342579  | 6.44E-05 | 0.000490426 | no |
| PRR15        | 0.219797842  | 4.049274159  | 6.44E-05 | 0.000490426 | no |
| ANKRD36      | -0.219738157 | -4.048118802 | 6.47E-05 | 0.00049256  | no |
| EYA1         | -0.219706519 | -4.047506386 | 6.48E-05 | 0.000493612 | no |
| LOC439990    | 0.219687209  | 4.047132607  | 6.49E-05 | 0.000494188 | no |
| LAMA2        | 0.219652896  | 4.046468432  | 6.51E-05 | 0.000495348 | no |
| LOC100507433 | -0.219603657 | -4.04551539  | 6.54E-05 | 0.000497093 | no |
| DIRAS3       | 0.219471148  | 4.04295075   | 6.61E-05 | 0.00050212  | no |
| GABRA3       | -0.219461306 | -4.04276027  | 6.61E-05 | 0.000502331 | no |
| ZNF721       | -0.21943301  | -4.042212658 | 6.62E-05 | 0.000503192 | no |
| G6PC3        | 0.219430501  | 4.042164094  | 6.63E-05 | 0.000503192 | no |
| FAM78B       | 0.219417984  | 4.041921868  | 6.63E-05 | 0.000503509 | no |
| RUFY2        | -0.219363421 | -4.040865938 | 6.66E-05 | 0.000505493 | no |
| SH3GL2       | -0.219328966 | -4.040199165 | 6.68E-05 | 0.000506684 | no |
| NEDD9        | 0.219312972  | 4.039889643  | 6.69E-05 | 0.000507142 | no |
| GID8         | -0.219306727 | -4.039768796 | 6.69E-05 | 0.000507211 | no |
| CD276        | 0.219298132  | 4.03960248   | 6.70E-05 | 0.000507375 | no |
| SCARA3       | 0.219259622  | 4.038857273  | 6.72E-05 | 0.000508732 | no |
| CTTNBP2      | -0.219219414 | -4.038079236 | 6.74E-05 | 0.00051016  | no |
| PLOD1        | 0.219107554  | 4.035914797  | 6.80E-05 | 0.000514416 | no |
| PAM          | 0.219104545  | 4.035856587  | 6.80E-05 | 0.000514416 | no |
| MOB3B        | -0.219079837 | -4.035378514 | 6.81E-05 | 0.000515233 | no |
| FAM157B      | 0.219046518  | 4.034733863  | 6.83E-05 | 0.000516399 | no |
| MCOLN1       | 0.219006165  | 4.033953128  | 6.85E-05 | 0.000517854 | no |
| SPTBN5       | 0.218998604  | 4.033806845  | 6.85E-05 | 0.000517975 | no |
| HIST1H2BC    | 0.218994203  | 4.033721703  | 6.86E-05 | 0.000517975 | no |
| SPATA13-AS1  | 0.218981638  | 4.033478591  | 6.86E-05 | 0.000518304 | no |
| ENPP1        | 0.218962594  | 4.033110149  | 6.87E-05 | 0.000518896 | no |
| ATP1A3       | -0.218891168 | -4.031728341 | 6.91E-05 | 0.000521626 | no |
| BRSK1        | -0.218869201 | -4.031303368 | 6.92E-05 | 0.000522341 | no |
| PXN          | 0.218827356  | 4.030493874  | 6.95E-05 | 0.000523872 | no |
| MYL6B        | -0.218803452 | -4.030031438 | 6.96E-05 | 0.00052467  | no |
| PDZK1IP1     | 0.21877654   | 4.029510854  | 6.97E-05 | 0.000525593 | no |
| LAMB2P1      | -0.218772036 | -4.029423717 | 6.98E-05 | 0.000525594 | no |
| COL4A2       | 0.218731395  | 4.028637565  | 7.00E-05 | 0.000527085 | no |
| SYT11        | -0.218703933 | -4.028106362 | 7.01E-05 | 0.000528035 | no |

|              |              |              |          |             |    |
|--------------|--------------|--------------|----------|-------------|----|
| ADARB2       | -0.218683297 | -4.027707193 | 7.03E-05 | 0.000528704 | no |
| RASL10A      | -0.218668891 | -4.027428528 | 7.03E-05 | 0.000529115 | no |
| THSD7A       | -0.218585461 | -4.025814818 | 7.08E-05 | 0.000532395 | no |
| CRMP1        | -0.218539038 | -4.024916924 | 7.11E-05 | 0.000534146 | no |
| ZNF157       | -0.218487577 | -4.023921632 | 7.13E-05 | 0.000536113 | no |
| AGXT2L1      | -0.21847131  | -4.02360703  | 7.14E-05 | 0.000536571 | no |
| VPS53        | -0.218467728 | -4.023537752 | 7.15E-05 | 0.000536571 | no |
| TBC1D5       | -0.218457011 | -4.023330478 | 7.15E-05 | 0.000536833 | no |
| LOC100289495 | -0.218430713 | -4.022821886 | 7.17E-05 | 0.000537751 | no |
| SART3        | -0.218409979 | -4.022420891 | 7.18E-05 | 0.000538435 | no |
| KBTBD8       | 0.218397407  | 4.022177749  | 7.19E-05 | 0.000538601 | no |
| PPP1R13B     | -0.218395209 | -4.022135255 | 7.19E-05 | 0.000538601 | no |
| CPLX2        | -0.218392645 | -4.022085665 | 7.19E-05 | 0.000538601 | no |
| NMNAT2       | -0.218384488 | -4.021927923 | 7.19E-05 | 0.000538757 | no |
| SMAD9        | -0.218357119 | -4.021398636 | 7.21E-05 | 0.000539723 | no |
| FLNC         | 0.218283129  | 4.019967794  | 7.25E-05 | 0.000542665 | no |
| SRRM3        | -0.218254802 | -4.019420034 | 7.27E-05 | 0.000543678 | no |
| NXPH1        | -0.218168457 | -4.017750393 | 7.31E-05 | 0.000547139 | no |
| CMKLR1       | 0.218164659  | 4.017676955  | 7.32E-05 | 0.000547139 | no |
| PIGT         | 0.218157353  | 4.017535692  | 7.32E-05 | 0.000547261 | no |
| MS4A6E       | 0.218127111  | 4.016950924  | 7.34E-05 | 0.000548364 | no |
| CALR         | 0.218117099  | 4.01675734   | 7.34E-05 | 0.000548599 | no |
| OBFC1        | 0.218112722  | 4.01667271   | 7.35E-05 | 0.000548599 | no |
| BCR          | -0.218061994 | -4.015691891 | 7.38E-05 | 0.000550585 | no |
| PORCN        | -0.218048144 | -4.015424105 | 7.38E-05 | 0.000550989 | no |
| LUZP2        | -0.218037165 | -4.01521183  | 7.39E-05 | 0.00055127  | no |
| SNCAIP       | -0.218009128 | -4.014669754 | 7.41E-05 | 0.000552287 | no |
| COL8A1       | 0.217962708  | 4.013772276  | 7.43E-05 | 0.000554099 | no |
| AFP          | 0.217931981  | 4.013178229  | 7.45E-05 | 0.000555236 | no |
| HLA-DPA1     | 0.217919585  | 4.012938565  | 7.46E-05 | 0.000555581 | no |
| INSRR        | 0.217899412  | 4.012548576  | 7.47E-05 | 0.000556263 | no |
| DTX2P1-UPK3E | 0.217888718  | 4.012341834  | 7.48E-05 | 0.000556535 | no |
| PLEKHS1      | 0.217881003  | 4.012192678  | 7.48E-05 | 0.000556677 | no |
| STARD3       | 0.217813207  | 4.010882052  | 7.52E-05 | 0.000559434 | no |
| PSD2         | -0.217750321 | -4.009666408 | 7.56E-05 | 0.00056199  | no |
| SLC39A6      | -0.217696929 | -4.008634333 | 7.59E-05 | 0.000564138 | no |
| PIK3R1       | -0.217664454 | -4.008006601 | 7.61E-05 | 0.000565372 | no |
| CRYZ         | 0.217569331  | 4.006167973  | 7.66E-05 | 0.000569381 | no |
| MUM1         | -0.217559988 | -4.005987393 | 7.67E-05 | 0.000569542 | no |
| NPL          | 0.217556842  | 4.005926576  | 7.67E-05 | 0.000569542 | no |
| MAPKAPK5-AS1 | -0.217538376 | -4.005569674 | 7.68E-05 | 0.000570164 | no |
| CCDC121      | 0.217519686  | 4.005208435  | 7.69E-05 | 0.000570798 | no |
| KCTD10       | 0.217495794  | 4.004746673  | 7.71E-05 | 0.000571609 | no |
| PCDH17       | -0.217492595 | -4.004684835 | 7.71E-05 | 0.000571609 | no |
| RANBP17      | -0.217470788 | -4.004263379 | 7.72E-05 | 0.000572329 | no |
| CD109        | 0.217467558  | 4.00420095   | 7.73E-05 | 0.000572329 | no |
| TRAM2        | 0.217418541  | 4.003253615  | 7.76E-05 | 0.000574319 | no |
| COL1A2       | 0.217344054  | 4.001814104  | 7.80E-05 | 0.00057746  | no |
| FSIP1        | 0.217282189  | 4.000618566  | 7.84E-05 | 0.000580046 | no |
| PN01         | 0.217243839  | 3.999877484  | 7.86E-05 | 0.000581579 | no |
| ANKRD26      | -0.217219553 | -3.999408189 | 7.88E-05 | 0.000582478 | no |

|           |              |              |          |             |    |
|-----------|--------------|--------------|----------|-------------|----|
| ATR       | 0.217200389  | 3.999037875  | 7.89E-05 | 0.000583146 | no |
| GBP6      | 0.217089247  | 3.996890329  | 7.96E-05 | 0.000588004 | no |
| MKRN3     | -0.216951695 | -3.994232696 | 8.04E-05 | 0.000594118 | no |
| BTG1      | 0.216909773  | 3.993422766  | 8.07E-05 | 0.000595851 | no |
| RNF217    | 0.216832763  | 3.99193501   | 8.12E-05 | 0.000599218 | no |
| LINC00152 | 0.216804167  | 3.991382593  | 8.13E-05 | 0.000600344 | no |
| CBWD1     | 0.216755558  | 3.990443575  | 8.17E-05 | 0.000602406 | no |
| AP2S1     | 0.216737261  | 3.990090114  | 8.18E-05 | 0.000603055 | no |
| USP40     | 0.216681468  | 3.989012362  | 8.21E-05 | 0.000605463 | no |
| SNTG1     | -0.216676072 | -3.988908135 | 8.22E-05 | 0.000605509 | no |
| PTPRT     | -0.216613295 | -3.987695536 | 8.26E-05 | 0.000608256 | no |
| ZFP36L1   | 0.216562468  | 3.986713808  | 8.29E-05 | 0.000610449 | no |
| PDXP      | -0.21654967  | -3.986466614 | 8.30E-05 | 0.000610846 | no |
| EML3      | 0.216534073  | 3.986165363  | 8.31E-05 | 0.000611295 | no |
| PARP8     | 0.216531351  | 3.986112784  | 8.31E-05 | 0.000611295 | no |
| DIP2B     | -0.216494796 | -3.985406753 | 8.33E-05 | 0.00061282  | no |
| TRIB1     | 0.216467973  | 3.984888698  | 8.35E-05 | 0.000613885 | no |
| BCHE      | -0.216416079 | -3.98388644  | 8.38E-05 | 0.000616148 | no |
| SLC17A5   | 0.216410554  | 3.983779746  | 8.39E-05 | 0.000616201 | no |
| NPTXR     | -0.216377249 | -3.983136531 | 8.41E-05 | 0.000617582 | no |
| TOM1L2    | -0.216362493 | -3.98285157  | 8.42E-05 | 0.000618077 | no |
| HMGA1P7   | -0.216335248 | -3.982325407 | 8.44E-05 | 0.000619171 | no |
| BMP2      | -0.216307903 | -3.981797327 | 8.45E-05 | 0.000620272 | no |
| SYNM      | 0.216284787  | 3.981350917  | 8.47E-05 | 0.000621171 | no |
| KCNK4     | -0.216257732 | -3.980828467 | 8.49E-05 | 0.000622262 | no |
| CDR2      | 0.216244911  | 3.980580884  | 8.49E-05 | 0.000622667 | no |
| TSPYL2    | -0.216231103 | -3.980314231 | 8.50E-05 | 0.000623121 | no |
| PIWIL4    | 0.216082664  | 3.977447932  | 8.60E-05 | 0.000630106 | no |
| ALG3      | 0.216056195  | 3.976936857  | 8.62E-05 | 0.000631182 | no |
| MT1DP     | 0.2160382    | 3.976589417  | 8.63E-05 | 0.000631846 | no |
| MRGPRF    | 0.215992398  | 3.975705087  | 8.66E-05 | 0.000633872 | no |
| IFNE      | 0.215970102  | 3.975274612  | 8.68E-05 | 0.00063475  | no |
| CASS4     | 0.215921978  | 3.974345474  | 8.71E-05 | 0.000636899 | no |
| MGAT4B    | 0.215867004  | 3.973284137  | 8.75E-05 | 0.000639394 | no |
| ATP11C    | 0.215861078  | 3.973169737  | 8.75E-05 | 0.000639469 | no |
| RPLPOP2   | 0.215804604  | 3.972079486  | 8.79E-05 | 0.000642048 | no |
| ZC3H12A   | 0.21576373   | 3.971290426  | 8.82E-05 | 0.000643738 | no |
| FLJ42709  | -0.215761773 | -3.971252643 | 8.82E-05 | 0.000643738 | no |
| MTA1      | -0.215745139 | -3.970931538 | 8.83E-05 | 0.000644347 | no |
| TGDS      | 0.215687986  | 3.969828279  | 8.87E-05 | 0.000646978 | no |
| TREML1    | 0.215642103  | 3.968942587  | 8.90E-05 | 0.000648878 | no |
| GABARAPL2 | -0.215641213 | -3.968925415 | 8.90E-05 | 0.000648878 | no |
| TRAP1     | -0.215628137 | -3.968673006 | 8.91E-05 | 0.000649313 | no |
| H2AFY2    | -0.215605895 | -3.968243685 | 8.93E-05 | 0.000650209 | no |
| MYH10     | -0.215568728 | -3.967526282 | 8.95E-05 | 0.000651642 | no |
| FSTL3     | 0.215568596  | 3.967523722  | 8.95E-05 | 0.000651642 | no |
| HMGB3     | -0.215549264 | -3.967150575 | 8.96E-05 | 0.000652394 | no |
| SERINC5   | -0.215527701 | -3.966734393 | 8.98E-05 | 0.000653259 | no |
| AGSK1     | -0.215517068 | -3.966529153 | 8.99E-05 | 0.000653574 | no |
| FGF9      | -0.215360439 | -3.963506189 | 9.10E-05 | 0.00066109  | no |
| AGAP3     | -0.215360052 | -3.963498721 | 9.10E-05 | 0.00066109  | no |

|              |              |              |             |             |    |
|--------------|--------------|--------------|-------------|-------------|----|
| OLIG2        | -0.215303354 | -3.962404522 | 9.14E-05    | 0.00066362  | no |
| ATP6V1G2     | -0.215301749 | -3.962373552 | 9.14E-05    | 0.00066362  | no |
| FLJ37201     | -0.215265712 | -3.961678102 | 9.16E-05    | 0.000665241 | no |
| ITSN2        | 0.215249142  | 3.961358325  | 9.17E-05    | 0.000665866 | no |
| MTPAP        | -0.215214779 | -3.960695215 | 9.20E-05    | 0.000667406 | no |
| TWSG1        | 0.215187154  | 3.960162129  | 9.22E-05    | 0.000668603 | no |
| TRABD        | 0.215090377  | 3.958294691  | 9.29E-05    | 0.000673378 | no |
| PLA2G5       | 0.215051637  | 3.957547191  | 9.31E-05    | 0.000675162 | no |
| LRRC4B       | -0.215024282 | -3.957019371 | 9.33E-05    | 0.000676259 | no |
| HES6         | -0.215021804 | -3.956971564 | 9.34E-05    | 0.000676259 | no |
| RFPL3-AS1    | -0.215004034 | -3.956628706 | 9.35E-05    | 0.000676956 | no |
| PAPPA2       | 0.214993262  | 3.956420872  | 9.36E-05    | 0.00067729  | no |
| MYD88        | 0.214965497  | 3.955885169  | 9.38E-05    | 0.00067851  | no |
| GJA4         | 0.214856567  | 3.953783545  | 9.46E-05    | 0.000683991 | no |
| COL4A1       | 0.214821141  | 3.953100096  | 9.48E-05    | 0.000685459 | no |
| TBPL1        | -0.214819946 | -3.953077029 | 9.48E-05    | 0.000685459 | no |
| PTPN6        | 0.214791265  | 3.952523719  | 9.50E-05    | 0.000686742 | no |
| HSP90B1      | 0.214702044  | 3.950802542  | 9.57E-05    | 0.000691237 | no |
| PKI55        | -0.214677417 | -3.950327492 | 9.59E-05    | 0.000692314 | no |
| PM20D2       | -0.214661524 | -3.950020908 | 9.60E-05    | 0.000692822 | no |
| EPT1         | -0.214659126 | -3.949974657 | 9.60E-05    | 0.000692822 | no |
| GPR158       | -0.214642649 | -3.949656806 | 9.61E-05    | 0.000693467 | no |
| VPS33B       | -0.21461627  | -3.949147978 | 9.63E-05    | 0.000694641 | no |
| RMND5A       | -0.214538462 | -3.947647128 | 9.69E-05    | 0.000698572 | no |
| ITGB1        | 0.214506737  | 3.947035218  | 9.71E-05    | 0.000699956 | no |
| PARVB        | 0.214503963  | 3.946981707  | 9.72E-05    | 0.000699956 | no |
| ACBD6        | -0.214437065 | -3.945691421 | 9.77E-05    | 0.000703325 | no |
| IL1B         | 0.214422412  | 3.94540881   | 9.78E-05    | 0.000703881 | no |
| ANKRD45      | 0.214351002  | 3.944031552  | 9.83E-05    | 0.000707298 | no |
| ECSIT        | -0.214349375 | -3.944000177 | 9.83E-05    | 0.000707298 | no |
| MYO1C        | 0.214346227  | 3.943939471  | 9.83E-05    | 0.000707298 | no |
| RIMS2        | -0.214334305 | -3.943709547 | 9.84E-05    | 0.000707688 | no |
| MGC57346     | -0.214326041 | -3.943550162 | 9.85E-05    | 0.000707688 | no |
| DKFZp686D085 | 0.214325969  | 3.943548769  | 9.85E-05    | 0.000707688 | no |
| 40603        | -0.214244481 | -3.941977265 | 9.91E-05    | 0.000711889 | no |
| TXNRD2       | -0.214222277 | -3.941549073 | 9.93E-05    | 0.000712596 | no |
| KIF1A        | -0.214218544 | -3.941477079 | 9.93E-05    | 0.000712596 | no |
| TPM4         | 0.214218469  | 3.941475639  | 9.93E-05    | 0.000712596 | no |
| HSP90AA1     | -0.214183664 | -3.94080446  | 9.96E-05    | 0.000714262 | no |
| BRE-AS1      | 0.214171451  | 3.940568952  | 9.97E-05    | 0.000714693 | no |
| SPON1        | -0.214151073 | -3.940175986 | 9.98E-05    | 0.000715572 | no |
| CKMT1B       | -0.214093769 | -3.939070985 | 0.000100262 | 0.000718483 | no |
| SIGLEC10     | 0.214084871  | 3.93889942   | 0.00010033  | 0.000718733 | no |
| LOC400940    | -0.214074244 | -3.938694505 | 0.000100412 | 0.000719079 | no |
| CIT          | -0.214066449 | -3.938544197 | 0.000100472 | 0.000719269 | no |
| PRPSAP2      | -0.214048761 | -3.938203122 | 0.000100608 | 0.000720005 | no |
| RPS6KA5      | -0.213983261 | -3.936940175 | 0.000101115 | 0.000723388 | no |
| VPS4A        | -0.213858787 | -3.934540271 | 0.000102083 | 0.000730009 | no |
| FAM117A      | 0.213855619  | 3.934479188  | 0.000102108 | 0.000730009 | no |
| CLIP2        | -0.213794935 | -3.933309248 | 0.000102584 | 0.000733164 | no |
| RAB41        | -0.213780063 | -3.933022554 | 0.0001027   | 0.000733755 | no |

|           |              |              |             |             |    |
|-----------|--------------|--------------|-------------|-------------|----|
| ZNF853    | -0.213724166 | -3.931944944 | 0.000103141 | 0.000736524 | no |
| ALDH2     | -0.213722166 | -3.931906385 | 0.000103157 | 0.000736524 | no |
| NUP98     | 0.213671453  | 3.930928777  | 0.000103558 | 0.000738908 | no |
| GABRG2    | -0.213671253 | -3.930924921 | 0.000103559 | 0.000738908 | no |
| ZNF74     | -0.213661158 | -3.930730322 | 0.000103639 | 0.000739234 | no |
| VPS13B    | -0.213625784 | -3.930048424 | 0.00010392  | 0.000740991 | no |
| KIAA0040  | 0.213539622  | 3.92838756   | 0.000104607 | 0.000745642 | no |
| ACTB      | 0.21352015   | 3.928012225  | 0.000104763 | 0.000746506 | no |
| CPB2-AS1  | -0.213509546 | -3.927807834 | 0.000104848 | 0.000746863 | no |
| SUPT16H   | -0.213485617 | -3.927346611 | 0.00010504  | 0.000747983 | no |
| TMIE      | 0.21348002   | 3.92723873   | 0.000105085 | 0.000748055 | no |
| TMEM107   | 0.213452631  | 3.926710803  | 0.000105305 | 0.000749375 | no |
| C12orf29  | -0.213447383 | -3.926609661 | 0.000105347 | 0.000749427 | no |
| RAB11FIP4 | -0.21343784  | -3.926425732 | 0.000105424 | 0.000749726 | no |
| ATXN1     | 0.213425886  | 3.926195319  | 0.000105521 | 0.000750163 | no |
| SSH3      | 0.213417737  | 3.926038257  | 0.000105586 | 0.000750382 | no |
| EIF3L     | -0.213409923 | -3.92588766  | 0.000105649 | 0.000750582 | no |
| ADCY3     | 0.213377444  | 3.925261664  | 0.000105912 | 0.000752198 | no |
| ZNF138    | -0.213369775 | -3.925113864 | 0.000105974 | 0.00075239  | no |
| CNTNAP2   | -0.213361119 | -3.924947026 | 0.000106044 | 0.000752639 | no |
| PCIF1     | -0.213339609 | -3.924532477 | 0.000106218 | 0.000753628 | no |
| MYO1B     | 0.213318766  | 3.924130761  | 0.000106388 | 0.00075458  | no |
| ASCL1     | -0.213303523 | -3.923836999 | 0.000106512 | 0.00075521  | no |
| FBXO45    | -0.213288034 | -3.92353849  | 0.000106638 | 0.000755854 | no |
| ZNF843    | -0.213263124 | -3.923058429 | 0.000106841 | 0.000757044 | no |
| KCTD12    | 0.213228421  | 3.922389629  | 0.000107124 | 0.0007588   | no |
| VCAM1     | 0.213224147  | 3.92230727   | 0.000107159 | 0.0007588   | no |
| DYNLRB1   | -0.213205087 | -3.921939962 | 0.000107315 | 0.000759655 | no |
| LAMTOR3   | -0.213152439 | -3.920925391 | 0.000107747 | 0.000762462 | no |
| ABCA7     | 0.213111602  | 3.920138455  | 0.000108084 | 0.000764591 | no |
| SMCR7L    | -0.213066064 | -3.919260953 | 0.00010846  | 0.000766999 | no |
| NKAIN3    | -0.21304262  | -3.918809202 | 0.000108654 | 0.00076812  | no |
| C20orf203 | -0.213021312 | -3.918398617 | 0.000108831 | 0.000769116 | no |
| DDHD2     | -0.212995626 | -3.917903691 | 0.000109044 | 0.000770371 | no |
| LIPH      | 0.212958777  | 3.917193677  | 0.000109351 | 0.000772285 | no |
| ARHGAP32  | -0.21289896  | -3.916041139 | 0.000109851 | 0.000775561 | no |
| CDK5R2    | -0.212847291 | -3.915045653 | 0.000110284 | 0.000778365 | no |
| NCR3      | 0.212839177  | 3.914889324  | 0.000110353 | 0.000778591 | no |
| NANOS3    | -0.212824707 | -3.914610535 | 0.000110474 | 0.000779051 | no |
| TDP2      | 0.212822818  | 3.914574135  | 0.00011049  | 0.000779051 | no |
| MLLT11    | -0.21280354  | -3.914202725 | 0.000110653 | 0.00077994  | no |
| LOC440461 | 0.212769913  | 3.913554872  | 0.000110937 | 0.000781685 | no |
| SLC34A2   | 0.212707195  | 3.912346606  | 0.000111468 | 0.000785171 | no |
| SRPX2     | 0.212660457  | 3.911446227  | 0.000111865 | 0.000787712 | no |
| CACNG8    | -0.21263609  | -3.910976823 | 0.000112073 | 0.000788917 | no |
| BOD1L1    | -0.21261137  | -3.910500617 | 0.000112284 | 0.000790144 | no |
| FAM222A   | -0.212571502 | -3.90973263  | 0.000112626 | 0.000792287 | no |
| AMDHD1    | 0.212518794  | 3.908717337  | 0.000113078 | 0.000795211 | no |
| C2CD5     | 0.212481554  | 3.908000013  | 0.000113399 | 0.000797207 | no |
| PDE4A     | -0.212456054 | -3.907508852 | 0.000113619 | 0.000798494 | no |
| SERINC4   | -0.212431923 | -3.907044051 | 0.000113828 | 0.000799699 | no |

|             |              |              |             |             |    |
|-------------|--------------|--------------|-------------|-------------|----|
| EFEMP2      | 0.212374575  | 3.90593949   | 0.000114326 | 0.000802932 | no |
| VWA5B2      | -0.212367571 | -3.905804578 | 0.000114387 | 0.000803098 | no |
| DZIP3       | -0.212346916 | -3.905406773 | 0.000114566 | 0.000804097 | no |
| CLINT1      | 0.212333717  | 3.905152561  | 0.000114681 | 0.000804642 | no |
| FAM81A      | -0.212323663 | -3.904958905 | 0.000114769 | 0.000804995 | no |
| GPBAR1      | 0.212253625  | 3.903610037  | 0.000115382 | 0.000809028 | no |
| TRIP10      | 0.212248817  | 3.903517431  | 0.000115424 | 0.00080906  | no |
| MRPL30      | -0.212131351 | -3.901255268 | 0.000116459 | 0.000816047 | no |
| TLX1        | -0.212105849 | -3.900764165 | 0.000116685 | 0.000817363 | no |
| QSOX2       | -0.212068437 | -3.900043733 | 0.000117017 | 0.000819204 | no |
| PCDH20      | -0.212067639 | -3.900028373 | 0.000117024 | 0.000819204 | no |
| REXO1L2P    | 0.212009837  | 3.898915324  | 0.000117538 | 0.000822539 | no |
| CXorf40A    | 0.211971804  | 3.898182973  | 0.000117878 | 0.000824392 | no |
| DNMT3A      | 0.211971619  | 3.898179406  | 0.00011788  | 0.000824392 | no |
| LOC150622   | -0.211783892 | -3.894564908 | 0.000119571 | 0.000835946 | no |
| UNC80       | -0.21173972  | -3.893714475 | 0.000119972 | 0.000838478 | no |
| VPS18       | 0.211720809  | 3.8933504    | 0.000120144 | 0.000839408 | no |
| BCL2L1      | 0.211688896  | 3.892736017  | 0.000120435 | 0.000841168 | no |
| NRBP1       | 0.211675007  | 3.89246863   | 0.000120562 | 0.000841689 | no |
| HSPA5       | 0.211672157  | 3.892413768  | 0.000120588 | 0.000841689 | no |
| SESTD1      | -0.211659565 | -3.892171352 | 0.000120703 | 0.000842219 | no |
| OPA3        | 0.211630243  | 3.891606872  | 0.000120972 | 0.000843819 | no |
| LMO2        | 0.211603563  | 3.891093256  | 0.000121217 | 0.000845253 | no |
| C14orf119   | 0.211514886  | 3.889386231  | 0.000122034 | 0.000850674 | no |
| AIM2        | 0.211504859  | 3.889193206  | 0.000122127 | 0.000851044 | no |
| TCF12       | -0.211498296 | -3.889066876 | 0.000122187 | 0.000851192 | no |
| CXCR7       | 0.211493249  | 3.888969722  | 0.000122234 | 0.000851241 | no |
| PAAF1       | -0.211425786 | -3.887671155 | 0.00012286  | 0.000855324 | no |
| NDUFV3      | 0.211413202  | 3.887428927  | 0.000122977 | 0.000855862 | no |
| MSL3        | 0.211397204  | 3.887121003  | 0.000123126 | 0.000856621 | no |
| TMEM254-AS1 | -0.211391837 | -3.88701771  | 0.000123176 | 0.000856692 | no |
| NRIP1       | 0.21138488   | 3.886883797  | 0.000123241 | 0.000856866 | no |
| E2F4        | 0.211352465  | 3.886259891  | 0.000123544 | 0.000858475 | no |
| IGFBP4      | 0.211351559  | 3.886242449  | 0.000123552 | 0.000858475 | no |
| AHSA1       | -0.211327539 | -3.885780137 | 0.000123777 | 0.000859759 | no |
| RAD21       | -0.211309653 | -3.885435878 | 0.000123945 | 0.000860645 | no |
| LRRC14      | -0.211276298 | -3.884793907 | 0.000124258 | 0.000862541 | no |
| NAGPA-AS1   | -0.211268914 | -3.884651788 | 0.000124327 | 0.000862744 | no |
| GRIK2       | -0.211244912 | -3.884189854 | 0.000124553 | 0.000863742 | no |
| SLC1A4      | -0.211243163 | -3.884156179 | 0.00012457  | 0.000863742 | no |
| DIRAS1      | -0.211236618 | -3.884030221 | 0.000124632 | 0.000863742 | no |
| SYCE2       | -0.211236571 | -3.884029324 | 0.000124632 | 0.000863742 | no |
| ADAMTSL4    | 0.211214768  | 3.88360971   | 0.000124838 | 0.000864889 | no |
| FABP5       | 0.211161669  | 3.882587799  | 0.00012534  | 0.000868089 | no |
| CCDC50      | 0.211130597  | 3.881989834  | 0.000125635 | 0.000869851 | no |
| CEP97       | -0.211104236 | -3.881482521 | 0.000125885 | 0.000871306 | no |
| RSL24D1     | -0.211080893 | -3.881033311 | 0.000126108 | 0.000872564 | no |
| PLEKHA3     | 0.21102913   | 3.880037209  | 0.000126602 | 0.000875702 | no |
| ASIC4       | -0.211003036 | -3.87953508  | 0.000126852 | 0.000877148 | no |
| PRTG        | -0.210991281 | -3.879308888 | 0.000126965 | 0.000877645 | no |
| VKORC1      | 0.210962927  | 3.878763276  | 0.000127237 | 0.000879245 | no |

|              |              |              |             |             |    |
|--------------|--------------|--------------|-------------|-------------|----|
| MVD          | -0.210921104 | -3.877958507 | 0.00012764  | 0.000881743 | no |
| RNF141       | -0.210891694 | -3.877392613 | 0.000127923 | 0.000883179 | no |
| JMJD1C       | -0.210891054 | -3.877380294 | 0.00012793  | 0.000883179 | no |
| TBC1D10A     | -0.210884671 | -3.877257489 | 0.000127991 | 0.000883321 | no |
| FCHSD2       | -0.21087811  | -3.87713124  | 0.000128055 | 0.000883475 | no |
| NAT1         | 0.210853871  | 3.876664852  | 0.000128289 | 0.00088481  | no |
| SYT4         | -0.210840307 | -3.876403865 | 0.000128421 | 0.000885432 | no |
| ZHX2         | -0.210829632 | -3.876198485 | 0.000128524 | 0.000885862 | no |
| LOC100505495 | 0.210816802  | 3.875951612  | 0.000128649 | 0.000886436 | no |
| ANK3         | -0.210761321 | -3.874884163 | 0.000129189 | 0.000889871 | no |
| TTC19        | -0.21075144  | -3.874694042 | 0.000129285 | 0.000889965 | no |
| CASD1        | -0.210751432 | -3.874693885 | 0.000129285 | 0.000889965 | no |
| KCNH4        | -0.210740156 | -3.874476939 | 0.000129395 | 0.000890438 | no |
| DLEU7-AS1    | 0.210726342  | 3.874211183  | 0.00012953  | 0.000891081 | no |
| CCR10        | 0.210691431  | 3.873539522  | 0.000129872 | 0.000893146 | no |
| ZNF561       | 0.210676467  | 3.873251626  | 0.000130019 | 0.000893869 | no |
| SLC35C1      | 0.210654207  | 3.872823385  | 0.000130237 | 0.000895085 | no |
| NIF3L1       | -0.210634064 | -3.872435858 | 0.000130435 | 0.000896159 | no |
| TM2D3        | -0.210604936 | -3.871875489 | 0.000130722 | 0.000897843 | no |
| SAMD4A       | 0.210562363  | 3.871056501  | 0.000131143 | 0.000900443 | no |
| EPS8L2       | 0.210520907  | 3.870259004  | 0.000131553 | 0.000902774 | no |
| PTBP3        | 0.210519603  | 3.870233928  | 0.000131566 | 0.000902774 | no |
| GPR124       | 0.210344798  | 3.866871425  | 0.000133311 | 0.000914453 | no |
| TSPAN3       | -0.210335001 | -3.866683001 | 0.000133409 | 0.000914836 | no |
| NCR3LG1      | -0.210207444 | -3.864229607 | 0.000134697 | 0.000923372 | no |
| BANF2        | 0.210177099  | 3.863646007  | 0.000135005 | 0.000924922 | no |
| TMEM217      | 0.210176678  | 3.863637912  | 0.000135009 | 0.000924922 | no |
| ZNF462       | -0.210127387 | -3.862689946 | 0.000135511 | 0.000928064 | no |
| CORO6        | -0.210119179 | -3.862532084 | 0.000135595 | 0.000928342 | no |
| LOC100131434 | 0.210110701  | 3.862369045  | 0.000135681 | 0.000928638 | no |
| LRRC4C       | -0.210104506 | -3.862249891 | 0.000135744 | 0.000928776 | no |
| NEURL4       | -0.210060619 | -3.861405902 | 0.000136193 | 0.000931551 | no |
| KDR          | 0.210052106  | 3.861242194  | 0.000136281 | 0.000931851 | no |
| BEX2         | -0.210028934 | -3.860796567 | 0.000136518 | 0.000933318 | no |
| PCDHGC3      | -0.209964065 | -3.859549129 | 0.000137186 | 0.000937402 | no |
| ABCB6        | -0.209960447 | -3.859479566 | 0.000137223 | 0.000937402 | no |
| PPP1R15A     | 0.209917285  | 3.85864959   | 0.000137669 | 0.000940151 | no |
| NGDN         | -0.209893249 | -3.858187393 | 0.000137918 | 0.000941552 | no |
| DLG4         | -0.209867015 | -3.857682951 | 0.000138191 | 0.000943111 | no |
| CMTM4        | -0.209854878 | -3.857449577 | 0.000138317 | 0.000943672 | no |
| SLC52A1      | 0.209836447  | 3.857095195  | 0.000138508 | 0.00094468  | no |
| DERL1        | 0.209812202  | 3.856628999  | 0.000138761 | 0.000946102 | no |
| RPS10-NUDT3  | -0.209786544 | -3.856135656 | 0.000139029 | 0.000947627 | no |
| RDH10        | 0.209757704  | 3.855581151  | 0.00013933  | 0.000949382 | no |
| MARVELD1     | 0.209713455  | 3.854730385  | 0.000139794 | 0.000952241 | no |
| CEP72        | -0.209688753 | -3.854255448 | 0.000140054 | 0.000953707 | no |
| PIH1D2       | 0.209661432  | 3.853730183  | 0.000140342 | 0.000955134 | no |
| APOBEC3B     | 0.209656797  | 3.853641069  | 0.00014039  | 0.000955134 | no |
| TICAM1       | 0.20965619   | 3.853629392  | 0.000140397 | 0.000955134 | no |
| MOB3C        | 0.209647429  | 3.853460969  | 0.000140489 | 0.00095546  | no |
| PLAGL1       | 0.209605359  | 3.852652143  | 0.000140934 | 0.000958179 | no |

|            |              |              |             |             |    |
|------------|--------------|--------------|-------------|-------------|----|
| SRRM4      | -0.209547797 | -3.851545538 | 0.000141544 | 0.000962024 | no |
| CD97       | 0.20952064   | 3.851023463  | 0.000141833 | 0.000963681 | no |
| TWISTNB    | 0.209407037  | 3.848839622  | 0.000143047 | 0.000971622 | no |
| FAM212B    | -0.209386274 | -3.848440502 | 0.000143269 | 0.000972829 | no |
| C5orf42    | -0.209357731 | -3.847891849 | 0.000143576 | 0.000974605 | no |
| RHOC       | 0.209318271  | 3.847133367  | 0.000144002 | 0.000977184 | no |
| NDRG3      | -0.209196029 | -3.844783776 | 0.000145327 | 0.000985867 | no |
| CNPY4      | 0.209045286  | 3.84188664   | 0.000146977 | 0.000996746 | no |
| ZNF493     | -0.20901457  | -3.841296337 | 0.000147316 | 0.000998726 | no |
| CHD6       | -0.208953683 | -3.840126254 | 0.000147989 | 0.001002972 | no |
| PLD4       | 0.208949416  | 3.840044265  | 0.000148036 | 0.001002976 | no |
| TMEFF1     | -0.208929686 | -3.839665106 | 0.000148255 | 0.001004141 | no |
| NUCKS1     | -0.208919941 | -3.839477846 | 0.000148363 | 0.001004557 | no |
| C11orf73   | -0.208905205 | -3.839194672 | 0.000148526 | 0.001005348 | no |
| DISP1      | 0.208877919  | 3.838670339  | 0.00014883  | 0.001007086 | no |
| DCLK2      | -0.20886653  | -3.838451496 | 0.000148957 | 0.001007627 | no |
| EMP2       | 0.208833383  | 3.837814557  | 0.000149327 | 0.001009811 | no |
| TBC1D17    | -0.208778591 | -3.836761727 | 0.00014994  | 0.001013638 | no |
| AP1G2      | 0.20869755   | 3.835204577  | 0.000150851 | 0.001019478 | no |
| TAOK2      | -0.208667944 | -3.834635756 | 0.000151185 | 0.001021415 | no |
| SDHA       | -0.20863675  | -3.834036405 | 0.000151538 | 0.001023477 | no |
| FLJ20021   | -0.208610152 | -3.833525386 | 0.00015184  | 0.001025191 | no |
| LOC653786  | 0.208544164  | 3.832257621  | 0.00015259  | 0.001029934 | no |
| ACTR3C     | 0.208526753  | 3.831923132  | 0.000152788 | 0.001030951 | no |
| LIPN       | 0.208503041  | 3.831467585  | 0.000153059 | 0.001032454 | no |
| SVEP1      | 0.208483941  | 3.831100647  | 0.000153278 | 0.001033603 | no |
| NFATC3     | 0.208477886  | 3.83098433   | 0.000153347 | 0.001033746 | no |
| LRP1B      | -0.208436009 | -3.830179837 | 0.000153827 | 0.001036446 | no |
| ALOX15B    | 0.208434549  | 3.830151802  | 0.000153844 | 0.001036446 | no |
| KIAA1737   | -0.20842711  | -3.830008892 | 0.00015393  | 0.001036697 | no |
| EFCAB4B    | 0.208407999  | 3.829641773  | 0.000154149 | 0.001037852 | no |
| HAR1A      | -0.208388433 | -3.829265897 | 0.000154375 | 0.001039043 | no |
| SGK494     | -0.208363018 | -3.828777687 | 0.000154668 | 0.00104069  | no |
| PXDN       | 0.20835006   | 3.828528776  | 0.000154817 | 0.001041371 | no |
| CTGF       | 0.208311344  | 3.827785067  | 0.000155265 | 0.001044057 | no |
| DOK4       | -0.208301145 | -3.827589173 | 0.000155384 | 0.001044512 | no |
| NUDT16     | 0.208297126  | 3.827511967  | 0.00015543  | 0.001044512 | no |
| GOLPH3     | 0.20827521   | 3.827090986  | 0.000155684 | 0.001045894 | no |
| PDK3       | 0.208266888  | 3.82693114   | 0.000155781 | 0.001046216 | no |
| USP34      | -0.208257829 | -3.826757135 | 0.000155886 | 0.001046597 | no |
| MYT1L      | -0.208240827 | -3.826430561 | 0.000156084 | 0.001047377 | no |
| FN1        | 0.208232828  | 3.826276904  | 0.000156177 | 0.001047377 | no |
| GYG1       | 0.208232199  | 3.826264835  | 0.000156185 | 0.001047377 | no |
| LEPROT     | 0.208231094  | 3.82624361   | 0.000156198 | 0.001047377 | no |
| RFX8       | 0.208200837  | 3.825662448  | 0.00015655  | 0.001049416 | no |
| TAF10      | 0.208144821  | 3.824586527  | 0.000157206 | 0.00105348  | no |
| PLEKHA8P1  | 0.208078157  | 3.823306163  | 0.000157989 | 0.001058398 | no |
| PHACTR3    | -0.208053272 | -3.822828223 | 0.000158282 | 0.001060032 | no |
| ZSCAN29    | -0.208034268 | -3.822463243 | 0.000158507 | 0.001061204 | no |
| POM121L10P | 0.207978274  | 3.821387883  | 0.000159169 | 0.001065086 | no |
| GMDS       | 0.20797689   | 3.821361296  | 0.000159186 | 0.001065086 | no |



|           |              |              |             |             |    |
|-----------|--------------|--------------|-------------|-------------|----|
| RPL9      | -0.207969813 | -3.82122539  | 0.00015927  | 0.001065316 | no |
| SHPRH     | -0.20794769  | -3.820800519 | 0.000159532 | 0.001066741 | no |
| SYNPO2    | 0.207926851  | 3.820400342  | 0.00015978  | 0.001068066 | no |
| HECTD3    | 0.207919536  | 3.820259856  | 0.000159867 | 0.001068316 | no |
| SLC37A4   | -0.207855106 | -3.819022566 | 0.000160636 | 0.00107312  | no |
| PMAIP1    | 0.207843984  | 3.818808991  | 0.000160769 | 0.001073675 | no |
| SH2D4A    | 0.207768156  | 3.817352904  | 0.000161679 | 0.001079417 | no |
| EEF2      | -0.207760559 | -3.817207031 | 0.00016177  | 0.001079692 | no |
| WWC2-AS2  | 0.207745252  | 3.816913113  | 0.000161955 | 0.00108045  | no |
| DIP2C     | -0.207742784 | -3.816865711 | 0.000161985 | 0.00108045  | no |
| MLL3      | -0.207718666 | -3.816402623 | 0.000162276 | 0.001082055 | no |
| PJA1      | -0.20770533  | -3.81614655  | 0.000162437 | 0.00108273  | no |
| DNASE1L2  | -0.207701943 | -3.816081508 | 0.000162478 | 0.00108273  | no |
| GLCCI1    | -0.207694042 | -3.81592981  | 0.000162573 | 0.001083031 | no |
| LINC00319 | -0.207656326 | -3.81520563  | 0.00016303  | 0.001085738 | no |
| MARCKS    | -0.207630096 | -3.814701989 | 0.000163348 | 0.001087521 | no |
| CCDC81    | 0.207611054  | 3.81433638   | 0.00016358  | 0.001088725 | no |
| OPLAH     | 0.207606881  | 3.814256258  | 0.000163631 | 0.001088726 | no |
| CAV2      | 0.207543368  | 3.813036833  | 0.000164405 | 0.001093541 | no |
| ITK       | 0.207538934  | 3.812951703  | 0.000164459 | 0.001093563 | no |
| UPP1      | 0.207509946  | 3.812395158  | 0.000164814 | 0.001095158 | no |
| ASH1L-AS1 | -0.207507027 | -3.812339126 | 0.00016485  | 0.001095158 | no |
| FAM120AOS | 0.207506851  | 3.812335749  | 0.000164852 | 0.001095158 | no |
| RPL34     | -0.207467472 | -3.811579725 | 0.000165335 | 0.001098028 | no |
| KIAA1279  | -0.207424947 | -3.810763325 | 0.000165859 | 0.001101163 | no |
| AASDHPPT  | -0.207389616 | -3.810085054 | 0.000166294 | 0.001103717 | no |
| SMIM10    | 0.207373153  | 3.80976901   | 0.000166498 | 0.001104313 | no |
| PIGG      | 0.207372904  | 3.80976424   | 0.000166501 | 0.001104313 | no |
| IER2      | 0.207369875  | 3.809706092  | 0.000166538 | 0.001104313 | no |
| SEC14L6   | 0.207314457  | 3.808642249  | 0.000167225 | 0.001108526 | no |
| C7orf29   | 0.207223909  | 3.806904103  | 0.000168353 | 0.001115369 | no |
| SNHG6     | -0.207223261 | -3.806891665 | 0.000168362 | 0.001115369 | no |
| BTN3A1    | 0.2072182    | 3.806794516  | 0.000168425 | 0.001115445 | no |
| CD46      | 0.207180998  | 3.806080433  | 0.000168891 | 0.001118184 | no |
| TAPT1     | -0.207147176 | -3.805431229 | 0.000169315 | 0.001120649 | no |
| LOC730811 | -0.207085677 | -3.804250829 | 0.000170089 | 0.001125428 | no |
| C1orf87   | 0.207020633  | 3.803002437  | 0.000170912 | 0.001130522 | no |
| UBE2QL1   | -0.207011562 | -3.802828329 | 0.000171027 | 0.001130935 | no |
| AMY2A     | -0.207000298 | -3.802612155 | 0.00017117  | 0.001131358 | no |
| ANKFN1    | -0.206998225 | -3.802572369 | 0.000171196 | 0.001131358 | no |
| HLA-G     | 0.206930413  | 3.801270914  | 0.000172059 | 0.001136711 | no |
| GYG2      | 0.206921295  | 3.801095917  | 0.000172175 | 0.00113713  | no |
| TTBK2     | -0.206881467 | -3.800331579 | 0.000172684 | 0.001140141 | no |
| SMARCB1   | -0.206846282 | -3.799656347 | 0.000173135 | 0.001142767 | no |
| CYFIP1    | 0.206838809  | 3.799512942  | 0.000173231 | 0.001143048 | no |
| KDELRL2   | 0.206701896  | 3.796885637  | 0.000174997 | 0.001154345 | no |
| NTHL1     | -0.206676763 | -3.796403361 | 0.000175323 | 0.001156141 | no |
| FBXL17    | -0.206591859 | -3.794774232 | 0.000176428 | 0.001162944 | no |
| PATZ1     | -0.206589214 | -3.794723484 | 0.000176463 | 0.001162944 | no |
| GPR61     | -0.20656657  | -3.794289011 | 0.000176759 | 0.001164537 | no |
| ARHGEF5   | 0.206558382  | 3.794131913  | 0.000176866 | 0.001164886 | no |

|              |              |              |             |             |    |
|--------------|--------------|--------------|-------------|-------------|----|
| ZNF275       | -0.206530418 | -3.793595362 | 0.000177232 | 0.001166752 | no |
| TEAD3        | 0.206528473  | 3.79355804   | 0.000177258 | 0.001166752 | no |
| TTYH1        | -0.20648825  | -3.79278631  | 0.000177786 | 0.001169871 | no |
| CSNK1G2      | 0.206479332  | 3.792615217  | 0.000177903 | 0.001170284 | no |
| SULT1B1      | 0.206473688  | 3.792506936  | 0.000177978 | 0.001170415 | no |
| TREM1        | 0.206465997  | 3.79235938   | 0.000178079 | 0.001170722 | no |
| TXN2         | -0.206412065 | -3.791324657 | 0.000178791 | 0.001175042 | no |
| CH25H        | 0.206322496  | 3.789606318  | 0.000179978 | 0.001182487 | no |
| CIA01        | -0.206308539 | -3.789338568 | 0.000180164 | 0.001183346 | no |
| FAAH         | -0.206294578 | -3.789070741 | 0.00018035  | 0.001184206 | no |
| RRBP1        | 0.20626235   | 3.788452502  | 0.00018078  | 0.001186667 | no |
| PAN3-AS1     | -0.206214211 | -3.787529037 | 0.000181424 | 0.001190438 | no |
| RPL31P11     | 0.206211142  | 3.787470163  | 0.000181466 | 0.001190438 | no |
| RAMP3        | 0.206191144  | 3.787086561  | 0.000181734 | 0.001191834 | no |
| NDRG4        | -0.206143454 | -3.786171772 | 0.000182375 | 0.001195316 | no |
| ATP2B2       | -0.206143393 | -3.786170595 | 0.000182376 | 0.001195316 | no |
| TGM2         | 0.206122883  | 3.785777184  | 0.000182652 | 0.001196635 | no |
| TMEM243      | 0.206120198  | 3.785725686  | 0.000182689 | 0.001196635 | no |
| UNC5B        | 0.20605248   | 3.78442676   | 0.000183604 | 0.001202267 | no |
| SEC31B       | -0.206022156 | -3.783845141 | 0.000184016 | 0.001204594 | no |
| DENND1B      | 0.205969095  | 3.78282743   | 0.000184738 | 0.001208592 | no |
| RRAGD        | -0.205968999 | -3.782825597 | 0.000184739 | 0.001208592 | no |
| LARS         | -0.205961671 | -3.782685043 | 0.000184839 | 0.001208878 | no |
| LOC100507032 | -0.205883615 | -3.781187992 | 0.000185906 | 0.001215457 | no |
| CYFIP2       | -0.205879852 | -3.781115831 | 0.000185958 | 0.001215457 | no |
| NCSTN        | 0.205856343  | 3.78066497   | 0.000186281 | 0.001217197 | no |
| PTCD3        | -0.20583396  | -3.780235708 | 0.000186588 | 0.001218837 | no |
| HDDC2        | -0.205824668 | -3.780057499 | 0.000186716 | 0.001219302 | no |
| PIN1         | -0.205778696 | -3.779175858 | 0.00018735  | 0.00122307  | no |
| MPPED2       | -0.20576074  | -3.778831528 | 0.000187599 | 0.001224318 | no |
| PTPRZ1       | -0.205748162 | -3.778590311 | 0.000187773 | 0.001224719 | no |
| MDK          | 0.205748068  | 3.778588514  | 0.000187774 | 0.001224719 | no |
| PLXNB3       | -0.205738396 | -3.778403026 | 0.000187908 | 0.00122522  | no |
| INPP5B       | 0.205715631  | 3.777966484  | 0.000188223 | 0.001226906 | no |
| EPHA3        | 0.205690901  | 3.777492248  | 0.000188567 | 0.001228771 | no |
| RRN3         | -0.205679124 | -3.777266401 | 0.00018873  | 0.001229465 | no |
| PTPRS        | -0.205649887 | -3.776705752 | 0.000189137 | 0.001231465 | no |
| XPNPEP3      | -0.205648841 | -3.776685708 | 0.000189152 | 0.001231465 | no |
| LOC100289509 | -0.205643534 | -3.776583933 | 0.000189226 | 0.001231574 | no |
| CXXC11       | -0.205630428 | -3.776332617 | 0.000189409 | 0.00123239  | no |
| GIT1         | -0.205594887 | -3.775651109 | 0.000189905 | 0.001235247 | no |
| ZNF559-ZNF17 | -0.205583588 | -3.775434462 | 0.000190064 | 0.001235902 | no |
| TEX22        | -0.205571506 | -3.775202788 | 0.000190233 | 0.001236547 | no |
| SDF4         | 0.205559495  | 3.774972474  | 0.000190401 | 0.001236547 | no |
| HIP1R        | -0.205557613 | -3.774936401 | 0.000190427 | 0.001236547 | no |
| BTBD2        | -0.205548528 | -3.774762195 | 0.000190555 | 0.001236547 | no |
| LOC100288432 | 0.20554585   | 3.774710851  | 0.000190593 | 0.001236547 | no |
| KIF5C        | -0.20554166  | -3.774630506 | 0.000190651 | 0.001236547 | no |
| KIRREL       | 0.205541546  | 3.774628314  | 0.000190653 | 0.001236547 | no |
| RPL10        | -0.205541441 | -3.774626305 | 0.000190654 | 0.001236547 | no |
| ACPP         | 0.205539575  | 3.774590518  | 0.000190681 | 0.001236547 | no |

|              |               |               |              |              |    |
|--------------|---------------|---------------|--------------|--------------|----|
| MRPL17       | 0. 205512441  | 3. 774070246  | 0. 000191062 | 0. 001238283 | no |
| LDHB         | -0. 205508512 | -3. 773994917 | 0. 000191117 | 0. 001238283 | no |
| ASRGL1       | -0. 205508232 | -3. 77398954  | 0. 000191121 | 0. 001238283 | no |
| GMPPB        | 0. 205502722  | 3. 773883909  | 0. 000191199 | 0. 001238412 | no |
| GABRE        | 0. 205462802  | 3. 773118486  | 0. 000191762 | 0. 001241683 | no |
| OR2A20P      | 0. 205407681  | 3. 772061645  | 0. 000192541 | 0. 001246356 | no |
| IL11         | 0. 205376906  | 3. 771471607  | 0. 000192978 | 0. 001248476 | no |
| SLAIN2       | 0. 205376399  | 3. 771461902  | 0. 000192985 | 0. 001248476 | no |
| CEP44        | -0. 205371401 | -3. 771366066 | 0. 000193056 | 0. 00124856  | no |
| FDFT1        | -0. 205362975 | -3. 771204526 | 0. 000193176 | 0. 001248958 | no |
| SCARNA7      | -0. 205313367 | -3. 770253449 | 0. 000193882 | 0. 001253148 | no |
| MKNK2        | 0. 20529774   | 3. 769953861  | 0. 000194105 | 0. 001254212 | no |
| PDZRN4       | -0. 205279747 | -3. 769608898 | 0. 000194362 | 0. 001255495 | no |
| ZNF675       | -0. 205258327 | -3. 769198258 | 0. 000194668 | 0. 001257097 | no |
| DPH3         | 0. 205241052  | 3. 768867092  | 0. 000194916 | 0. 001258153 | no |
| EIF4E2       | 0. 205238738  | 3. 768822735  | 0. 000194949 | 0. 001258153 | no |
| VN1R1        | -0. 205188211 | -3. 767854102 | 0. 000195675 | 0. 001261979 | no |
| ATP6VOB      | 0. 205185599  | 3. 767804031  | 0. 000195712 | 0. 001261979 | no |
| RRAGC        | 0. 205185195  | 3. 767796286  | 0. 000195718 | 0. 001261979 | no |
| IRF7         | 0. 205154369  | 3. 76720537   | 0. 000196162 | 0. 001264463 | no |
| PCDHGC4      | -0. 205126351 | -3. 766668281 | 0. 000196566 | 0. 001266689 | no |
| HECTD1       | -0. 205106167 | -3. 766281373 | 0. 000196858 | 0. 00126819  | no |
| TTC28        | -0. 205097292 | -3. 766111238 | 0. 000196987 | 0. 001268421 | no |
| RMND5B       | -0. 205095529 | -3. 766077455 | 0. 000197012 | 0. 001268421 | no |
| CA2          | 0. 205083779  | 3. 765852219  | 0. 000197182 | 0. 001269136 | no |
| PTPN7        | 0. 20507919   | 3. 765764252  | 0. 000197249 | 0. 001269184 | no |
| CSPG5        | -0. 205066154 | -3. 765514366 | 0. 000197438 | 0. 00127002  | no |
| CARD8        | 0. 205047799  | 3. 765162532  | 0. 000197704 | 0. 001271354 | no |
| TOMM70A      | -0. 205042095 | -3. 765053201 | 0. 000197787 | 0. 001271506 | no |
| PMEPA1       | 0. 205032806  | 3. 76487514   | 0. 000197922 | 0. 001271994 | no |
| SLC46A2      | 0. 205007361  | 3. 764387413  | 0. 000198293 | 0. 001273993 | no |
| DTNB         | 0. 204967003  | 3. 763613852  | 0. 000198881 | 0. 001277063 | no |
| ZBTB5        | -0. 20496645  | -3. 763603241 | 0. 000198889 | 0. 001277063 | no |
| GDF9         | -0. 204939202 | -3. 76308099  | 0. 000199288 | 0. 001279239 | no |
| LRRC24       | -0. 204930258 | -3. 762909555 | 0. 000199419 | 0. 001279697 | no |
| TUBB6        | 0. 204902475  | 3. 762377051  | 0. 000199826 | 0. 001281927 | no |
| RPL15        | -0. 20488316  | -3. 762006846 | 0. 000200109 | 0. 001283363 | no |
| B3GAT3       | 0. 204875087  | 3. 761852124  | 0. 000200228 | 0. 001283741 | no |
| CD1A         | 0. 204854742  | 3. 761462191  | 0. 000200527 | 0. 001285276 | no |
| DCC          | -0. 204828289 | -3. 760955204 | 0. 000200917 | 0. 00128739  | no |
| LAS1L        | -0. 204792185 | -3. 760263259 | 0. 00020145  | 0. 001290421 | no |
| ARL1         | 0. 204772909  | 3. 759893833  | 0. 000201735 | 0. 001291862 | no |
| RNF144A      | -0. 204764201 | -3. 759726939 | 0. 000201864 | 0. 001292303 | no |
| MANEAL       | -0. 204733037 | -3. 759129694 | 0. 000202326 | 0. 001294802 | no |
| C17orf51     | -0. 204729744 | -3. 759066573 | 0. 000202375 | 0. 001294802 | no |
| UBAP1L       | -0. 204720074 | -3. 758881262 | 0. 000202519 | 0. 001295336 | no |
| C2orf27A     | -0. 204715651 | -3. 758796498 | 0. 000202584 | 0. 00129537  | no |
| B4GALNT4     | -0. 204687308 | -3. 758253329 | 0. 000203006 | 0. 00129768  | no |
| LOC100131551 | 0. 204675765  | 3. 75803212   | 0. 000203178 | 0. 001298393 | no |
| PMFBP1       | 0. 204666884  | 3. 757861943  | 0. 00020331  | 0. 001298853 | no |
| CHERP        | -0. 204627416 | -3. 757105593 | 0. 0002039   | 0. 00130223  | no |

|           |              |              |             |             |    |
|-----------|--------------|--------------|-------------|-------------|----|
| ZC3H13    | -0.204584536 | -3.756283892 | 0.000204542 | 0.001305942 | no |
| ZNF84     | -0.204570619 | -3.756017209 | 0.00020475  | 0.001306887 | no |
| HAS2      | 0.204503448  | 3.754730081  | 0.000205761 | 0.001312947 | no |
| HMGB1     | -0.204457666 | -3.753852835 | 0.000206452 | 0.001316967 | no |
| RB1       | 0.204410318  | 3.752945612  | 0.000207169 | 0.001321151 | no |
| ACTA2     | 0.204395062  | 3.752653289  | 0.000207401 | 0.001322236 | no |
| TMEM167B  | 0.204379169  | 3.752348786  | 0.000207643 | 0.001323383 | no |
| ERGIC1    | 0.204353556  | 3.751858045  | 0.000208032 | 0.001325475 | no |
| HLF       | -0.204340762 | -3.751612915 | 0.000208227 | 0.001326324 | no |
| GPA33     | 0.20432439   | 3.751299227  | 0.000208477 | 0.001327521 | no |
| TXLNB     | 0.204310428  | 3.751031724  | 0.00020869  | 0.001328485 | no |
| RUSC2     | -0.204277593 | -3.750402654 | 0.000209193 | 0.001330935 | no |
| GRAP      | 0.204277171  | 3.750394551  | 0.000209199 | 0.001330935 | no |
| PLA2G6    | -0.20425889  | -3.750044318 | 0.000209479 | 0.001332323 | no |
| RTN4R     | -0.204249189 | -3.749858458 | 0.000209628 | 0.001332875 | no |
| KCNN1     | -0.204239487 | -3.749672579 | 0.000209777 | 0.001333427 | no |
| TMED10    | 0.204219225  | 3.749284412  | 0.000210088 | 0.001335011 | no |
| TNFAIP6   | 0.204206509  | 3.749040788  | 0.000210284 | 0.001335859 | no |
| HMGCR     | -0.20417469  | -3.748431209 | 0.000210774 | 0.001338577 | no |
| ZNF10     | -0.204075067 | -3.746522738 | 0.000212316 | 0.001347969 | no |
| CNTN3     | -0.204062898 | -3.746289617 | 0.000212505 | 0.00134877  | no |
| SERPINH1  | 0.204037462  | 3.745802369  | 0.0002129   | 0.001350882 | no |
| TLE6      | 0.204011837  | 3.745311513  | 0.000213299 | 0.001353016 | no |
| BDP1      | -0.203987754 | -3.744850183 | 0.000213675 | 0.001355    | no |
| NIPSNAP3A | 0.203959656  | 3.744311964  | 0.000214115 | 0.001357385 | no |
| SH3KBP1   | 0.203944061  | 3.744013242  | 0.000214359 | 0.001358533 | no |
| NCAM2     | -0.203923565 | -3.743620659 | 0.00021468  | 0.001360168 | no |
| NECAB2    | -0.203919038 | -3.743533936 | 0.000214751 | 0.001360217 | no |
| NOP10     | 0.203906192  | 3.743287888  | 0.000214953 | 0.001361093 | no |
| SIRT1     | -0.20388769  | -3.742933495 | 0.000215244 | 0.001362533 | no |
| FLOT1     | 0.203842865  | 3.742074932  | 0.00021595  | 0.0013666   | no |
| DUSP3     | 0.203819401  | 3.741625499  | 0.00021632  | 0.001368432 | no |
| AGPAT5    | -0.203816468 | -3.741569322 | 0.000216366 | 0.001368432 | no |
| METTL2A   | -0.203802331 | -3.741298572 | 0.00021659  | 0.001369325 | no |
| MUL1      | 0.203799473  | 3.741243831  | 0.000216635 | 0.001369325 | no |
| PSPC1     | -0.203648817 | -3.738358448 | 0.000219031 | 0.001384062 | no |
| USP18     | 0.203640807  | 3.738205058  | 0.000219159 | 0.001384465 | no |
| RBMS2     | 0.203633357  | 3.738062371  | 0.000219278 | 0.001384539 | no |
| CHD9      | -0.20363202  | -3.738036782 | 0.0002193   | 0.001384539 | no |
| KDELRL1   | 0.203625988  | 3.737921262  | 0.000219396 | 0.001384742 | no |
| ANGPTL4   | 0.203444225  | 3.734440541  | 0.000222324 | 0.001402811 | no |
| DCXR      | -0.203409216 | -3.733770173 | 0.000222893 | 0.001405983 | no |
| PCDH12    | 0.203374038  | 3.733096588  | 0.000223465 | 0.001409179 | no |
| BTBD17    | -0.203362129 | -3.732868557 | 0.000223659 | 0.001409989 | no |
| TMOD2     | -0.20335277  | -3.732689342 | 0.000223811 | 0.001410537 | no |
| ELTD1     | 0.203316672  | 3.731998172  | 0.000224401 | 0.001413187 | no |
| EVA1A     | 0.203312741  | 3.731922903  | 0.000224465 | 0.001413187 | no |
| RNF112    | -0.203311985 | -3.731908422 | 0.000224478 | 0.001413187 | no |
| C11orf45  | 0.203310926  | 3.731888157  | 0.000224495 | 0.001413187 | no |
| TMEM132E  | 0.203303952  | 3.73175462   | 0.000224609 | 0.001413491 | no |
| B3GNT7    | 0.20327684   | 3.73123551   | 0.000225053 | 0.001415872 | no |

|           |              |              |             |             |    |
|-----------|--------------|--------------|-------------|-------------|----|
| COX7A2    | -0.203247167 | -3.730667389 | 0.00022554  | 0.00141852  | no |
| PGAP1     | -0.203236307 | -3.730459459 | 0.000225719 | 0.001419227 | no |
| SMIM17    | -0.203216553 | -3.730081242 | 0.000226044 | 0.001420855 | no |
| KDM3A     | -0.203199126 | -3.729747599 | 0.000226331 | 0.001422243 | no |
| ZNF492    | -0.203188582 | -3.729545725 | 0.000226505 | 0.00142292  | no |
| SETBP1    | -0.20307896  | -3.727447027 | 0.000228319 | 0.001433902 | no |
| SLC16A9   | -0.20304287  | -3.726756112 | 0.00022892  | 0.001437253 | no |
| LIMS1     | 0.203026538  | 3.72644346   | 0.000229192 | 0.001438542 | no |
| DCX       | -0.202999963 | -3.725934721 | 0.000229636 | 0.001440905 | no |
| IGFN1     | -0.202942877 | -3.724841934 | 0.000230591 | 0.001446479 | no |
| OLIG1     | -0.202929993 | -3.724595307 | 0.000230807 | 0.001447413 | no |
| ASB8      | -0.20292192  | -3.724440763 | 0.000230943 | 0.00144784  | no |
| SUCNR1    | 0.202916032  | 3.724328056  | 0.000231042 | 0.001448038 | no |
| MT1L      | 0.202905903  | 3.724134157  | 0.000231212 | 0.001448683 | no |
| VPS52     | -0.202891128 | -3.723851337 | 0.000231461 | 0.001449712 | no |
| OXCT1     | -0.202888117 | -3.723793698 | 0.000231511 | 0.001449712 | no |
| CLEC5A    | 0.20288291   | 3.723694029  | 0.000231599 | 0.001449839 | no |
| RIMS1     | -0.202836325 | -3.722802336 | 0.000232385 | 0.001454334 | no |
| RBKS      | 0.202821339  | 3.722515473  | 0.000232638 | 0.00145547  | no |
| BACE1-AS  | -0.202817572 | -3.722443379 | 0.000232702 | 0.00145547  | no |
| PSIP1     | -0.202809331 | -3.722285634 | 0.000232841 | 0.001455919 | no |
| CALN1     | -0.202766105 | -3.721458265 | 0.000233574 | 0.001459827 | no |
| LOC728743 | -0.202763195 | -3.721402559 | 0.000233623 | 0.001459827 | no |
| DLGAP3    | -0.202760444 | -3.721349904 | 0.00023367  | 0.001459827 | no |
| BLZF1     | 0.202720585  | 3.720587001  | 0.000234348 | 0.00146336  | no |
| MSC       | 0.202719176  | 3.720560038  | 0.000234372 | 0.00146336  | no |
| FAM19A2   | -0.202686764 | -3.719939683 | 0.000234924 | 0.001466384 | no |
| ARID4A    | -0.202675561 | -3.71972526  | 0.000235116 | 0.001467152 | no |
| RGS3      | 0.202656999  | 3.719370006  | 0.000235433 | 0.001468705 | no |
| ABHD14B   | 0.202645881  | 3.719157208  | 0.000235623 | 0.001469465 | no |
| ZNF761    | 0.2025987    | 3.718254232  | 0.000236432 | 0.00147408  | no |
| MGEA5     | -0.202553372 | -3.717386742 | 0.000237211 | 0.001478511 | no |
| JAZF1     | 0.202504945  | 3.71645996   | 0.000238047 | 0.001483287 | no |
| SLC25A18  | -0.202498994 | -3.716346074 | 0.000238149 | 0.001483498 | no |
| SLC7A14   | -0.20245036  | -3.715415378 | 0.000238991 | 0.001488239 | no |
| TRAPPC9   | -0.202447039 | -3.715351827 | 0.000239049 | 0.001488239 | no |
| SMYD5     | -0.202400196 | -3.714455433 | 0.000239863 | 0.001492745 | no |
| HS1BP3    | 0.202397392  | 3.714401778  | 0.000239912 | 0.001492745 | no |
| PAPPA     | 0.202355893  | 3.713607656  | 0.000240635 | 0.001496812 | no |
| CRBN      | -0.202336532 | -3.713237185 | 0.000240973 | 0.001498481 | no |
| C9orf66   | 0.202327179  | 3.713058206  | 0.000241137 | 0.001499064 | no |
| NT5C1A    | -0.202278182 | -3.712120666 | 0.000241995 | 0.001503965 | no |
| AMPD1     | 0.202262729  | 3.711824974  | 0.000242266 | 0.001505215 | no |
| P2RY13    | 0.20222375   | 3.711079163  | 0.000242952 | 0.001509038 | no |
| ASPHD1    | -0.202181418 | -3.710269183 | 0.000243698 | 0.001513199 | no |
| ZNF627    | -0.202177787 | -3.710199717 | 0.000243762 | 0.001513199 | no |
| OR7E14P   | 0.202104003  | 3.708788024  | 0.000245069 | 0.001520871 | no |
| PPARG     | 0.202032676  | 3.707423391  | 0.000246338 | 0.001528307 | no |
| IFT57     | 0.202012352  | 3.70703458   | 0.000246701 | 0.001530116 | no |
| MKNK1     | 0.201985703  | 3.706524742  | 0.000247178 | 0.001532629 | no |
| SLC36A1   | 0.201980462  | 3.706424485  | 0.000247271 | 0.001532769 | no |

|             |              |              |             |             |    |
|-------------|--------------|--------------|-------------|-------------|----|
| THSD4       | -0.201943598 | -3.705719255 | 0.000247932 | 0.001536421 | no |
| EMC3        | 0.20189495   | 3.7047886    | 0.000248807 | 0.001541396 | no |
| ZNF429      | -0.201834693 | -3.703635927 | 0.000249894 | 0.001547686 | no |
| IL12B       | 0.20181202   | 3.703202205  | 0.000250304 | 0.00154978  | no |
| GGACT       | 0.201729904  | 3.70163146   | 0.000251795 | 0.001558563 | no |
| THAP9       | -0.201638135 | -3.699876182 | 0.000253471 | 0.001568486 | no |
| EEPDI       | -0.201630127 | -3.699723012 | 0.000253618 | 0.001568942 | no |
| NADSYN1     | 0.201604951  | 3.699241485  | 0.00025408  | 0.001571347 | no |
| CDK2        | 0.201566863  | 3.698513006  | 0.00025478  | 0.001575225 | no |
| TRUB2       | -0.20155138  | -3.698216876 | 0.000255065 | 0.001576203 | no |
| BRD1        | -0.201550305 | -3.698196316 | 0.000255085 | 0.001576203 | no |
| GRIN3A      | -0.201520972 | -3.697635307 | 0.000255626 | 0.001579093 | no |
| CAMK4       | -0.201506399 | -3.697356592 | 0.000255896 | 0.001580302 | no |
| TGFB2       | 0.201488536  | 3.697014963  | 0.000256226 | 0.001581888 | no |
| CES1P1      | 0.201482538  | 3.696900266  | 0.000256337 | 0.001582119 | no |
| IRAK3       | 0.201472996  | 3.696717768  | 0.000256514 | 0.001582755 | no |
| SORCS3      | -0.201463768 | -3.696541292 | 0.000256685 | 0.001583355 | no |
| CDKL1       | -0.201454643 | -3.696366782 | 0.000256854 | 0.001583945 | no |
| EVI5L       | -0.201422215 | -3.695746618 | 0.000257456 | 0.001587203 | no |
| SLC16A4     | 0.201380048  | 3.694940223  | 0.000258241 | 0.001591585 | no |
| ARHGAP5-AS1 | -0.201371945 | -3.69478526  | 0.000258392 | 0.00159206  | no |
| IL1RN       | 0.201298418  | 3.6933792    | 0.000259767 | 0.001600073 | no |
| CPZ         | 0.201257215  | 3.692591295  | 0.00026054  | 0.001604377 | no |
| NKAIN1      | -0.201237421 | -3.69221279  | 0.000260913 | 0.001606209 | no |
| FAM206A     | 0.201198325  | 3.691465208  | 0.00026165  | 0.001610284 | no |
| TOR1A       | 0.201178336  | 3.691082995  | 0.000262027 | 0.001611308 | no |
| UG0898H09   | -0.201178062 | -3.691077748 | 0.000262032 | 0.001611308 | no |
| GDPD5       | 0.201175362  | 3.691026127  | 0.000262083 | 0.001611308 | no |
| SLC33A1     | 0.201173642  | 3.690993231  | 0.000262116 | 0.001611308 | no |
| LRIG3       | 0.201095077  | 3.689491025  | 0.000263605 | 0.001619998 | no |
| MLLT4       | -0.201082463 | -3.689249836 | 0.000263845 | 0.001621009 | no |
| TRPM8       | 0.20106204   | 3.68885936   | 0.000264233 | 0.001622933 | no |
| ZSCAN23     | -0.201050523 | -3.688639146 | 0.000264453 | 0.001623609 | no |
| TIGD1       | -0.201048329 | -3.688597209 | 0.000264495 | 0.001623609 | no |
| KDM5B       | -0.201010846 | -3.687880553 | 0.00026521  | 0.001627536 | no |
| SNAI3       | 0.200981365  | 3.687316894  | 0.000265774 | 0.001630352 | no |
| HCN4        | -0.200978937 | -3.687270486 | 0.000265821 | 0.001630352 | no |
| DGCR14      | -0.200923282 | -3.686206452 | 0.000266889 | 0.001636435 | no |
| ZNF709      | -0.200909214 | -3.685937489 | 0.000267159 | 0.001637627 | no |
| TREML2      | 0.200891587  | 3.685600496  | 0.000267499 | 0.001639239 | no |
| KCTD15      | -0.200870096 | -3.68518965  | 0.000267913 | 0.00164131  | no |
| PTK2        | -0.200832761 | -3.684475902 | 0.000268634 | 0.00164526  | no |
| MICU1       | -0.200825267 | -3.684332643 | 0.000268779 | 0.001645679 | no |
| BTRC        | -0.200797589 | -3.683803526 | 0.000269315 | 0.001648492 | no |
| VRK3        | 0.200762091  | 3.683124919  | 0.000270004 | 0.001652011 | no |
| BBIP1       | -0.200760047 | -3.68308585  | 0.000270044 | 0.001652011 | no |
| PTPN23      | -0.200741879 | -3.682738556 | 0.000270397 | 0.001653702 | no |
| LOC256880   | -0.200658965 | -3.681153605 | 0.000272015 | 0.001663125 | no |
| HOXB8       | 0.200653838  | 3.68105561   | 0.000272116 | 0.001663265 | no |
| GPR162      | -0.200647897 | -3.680942054 | 0.000272232 | 0.001663503 | no |
| LOC646762   | -0.200603381 | -3.68009114  | 0.000273105 | 0.001668363 | no |

|              |              |              |             |             |    |
|--------------|--------------|--------------|-------------|-------------|----|
| YTHDF2       | 0.200597872  | 3.679985852  | 0.000273213 | 0.00166855  | no |
| FOXL1        | 0.200567951  | 3.679413928  | 0.000273802 | 0.001671669 | no |
| YDJC         | 0.200547224  | 3.679017758  | 0.00027421  | 0.001673442 | no |
| TANC2        | -0.20054531  | -3.678981183 | 0.000274248 | 0.001673442 | no |
| VPS72        | -0.200520916 | -3.678514933 | 0.000274729 | 0.001675904 | no |
| SMAGP        | 0.200516004  | 3.678421035  | 0.000274826 | 0.00167602  | no |
| SC5DL        | -0.200497777 | -3.678072667 | 0.000275187 | 0.001677741 | no |
| CCDC28A      | 0.200466174  | 3.677468641  | 0.000275813 | 0.00168108  | no |
| UBE2V2       | -0.200461908 | -3.677387101 | 0.000275897 | 0.001681119 | no |
| ATAD1        | -0.200457058 | -3.677294414 | 0.000275993 | 0.001681228 | no |
| NEU4         | -0.200423291 | -3.67664904  | 0.000276664 | 0.001684835 | no |
| LMO3         | -0.200384257 | -3.675903024 | 0.000277441 | 0.001689089 | no |
| PDHA1        | -0.200367962 | -3.675591605 | 0.000277766 | 0.001690588 | no |
| YAF2         | -0.200324656 | -3.674763985 | 0.000278631 | 0.001695375 | no |
| SUPT20H      | -0.200283297 | -3.673973567 | 0.00027946  | 0.001699937 | no |
| ANXA11       | 0.200270768  | 3.673734148  | 0.000279712 | 0.001700986 | no |
| ADAMTSL1     | 0.20025087   | 3.673353881  | 0.000280112 | 0.001702936 | no |
| GPR4         | 0.200205646  | 3.672489673  | 0.000281023 | 0.001707991 | no |
| ZBTB38       | 0.200192712  | 3.672242508  | 0.000281284 | 0.001709094 | no |
| TTC9B        | -0.200149471 | -3.671416202 | 0.000282158 | 0.001713922 | no |
| RNFT1        | 0.200034328  | 3.669216027  | 0.000284498 | 0.001727361 | no |
| SEMA3C       | 0.200032725  | 3.669185403  | 0.000284531 | 0.001727361 | no |
| CAPG         | 0.200015065  | 3.668847962  | 0.000284892 | 0.001729062 | no |
| NHP2L1       | -0.199982904 | -3.668233469 | 0.000285549 | 0.001732565 | no |
| NDST4        | -0.199954588 | -3.667692435 | 0.00028613  | 0.001735596 | no |
| HRK          | -0.199940961 | -3.667432082 | 0.000286409 | 0.001736802 | no |
| SPAG4        | 0.199905477  | 3.666754119  | 0.000287139 | 0.001740734 | no |
| FAM5B        | -0.199854771 | -3.665785347 | 0.000288184 | 0.001746579 | no |
| FXVD6        | -0.199850602 | -3.665705686 | 0.00028827  | 0.001746608 | no |
| CLDN1        | 0.199831427  | 3.665339342  | 0.000288667 | 0.001748517 | no |
| BIRC3        | 0.199771439  | 3.664193291  | 0.00028991  | 0.001755553 | no |
| RFX7         | -0.199733921 | -3.663476544 | 0.00029069  | 0.001759781 | no |
| ZFR          | -0.199710999 | -3.663038643 | 0.000291168 | 0.001762176 | no |
| LOC100130691 | -0.199690142 | -3.662640201 | 0.000291603 | 0.001764313 | no |
| MCM7         | -0.199640165 | -3.661685495 | 0.000292648 | 0.001770139 | no |
| CCDC102A     | 0.199594813  | 3.660819154  | 0.0002936   | 0.001775395 | no |
| CSTF2T       | -0.19955605  | -3.660078712 | 0.000294415 | 0.001779826 | no |
| NPHP3-AS1    | 0.199451516  | 3.658081981  | 0.000296625 | 0.001792681 | no |
| MAML2        | -0.199428907 | -3.657650142 | 0.000297105 | 0.001794674 | no |
| ZFR2         | -0.199428122 | -3.657635147 | 0.000297122 | 0.001794674 | no |
| LINC00563    | 0.199422788  | 3.657533259  | 0.000297235 | 0.001794854 | no |
| GNRHR2       | -0.199410744 | -3.657303216 | 0.000297492 | 0.001795896 | no |
| DNAJB2       | -0.199394202 | -3.656987272 | 0.000297844 | 0.001797288 | no |
| PLSCR2       | 0.199392055  | 3.656946258  | 0.000297889 | 0.001797288 | no |
| TMEM138      | 0.199384039  | 3.656793153  | 0.00029806  | 0.001797613 | no |
| TM4SF1       | 0.199381672  | 3.656747945  | 0.000298111 | 0.001797613 | no |
| UBE2E2       | -0.199364155 | -3.656413384 | 0.000298484 | 0.001799361 | no |
| AP3S2        | 0.199333431  | 3.655826571  | 0.00029914  | 0.001802812 | no |
| LINC00609    | -0.199289816 | -3.654993574 | 0.000300074 | 0.001807933 | no |
| PNMA3        | -0.19928368  | -3.654876385 | 0.000300206 | 0.001808219 | no |
| HTATSF1      | -0.199267287 | -3.654563307 | 0.000300558 | 0.001809832 | no |

|            |              |              |             |             |    |
|------------|--------------|--------------|-------------|-------------|----|
| WSCD2      | -0.199222975 | -3.653717029 | 0.000301511 | 0.001815062 | no |
| WDR6       | -0.199109285 | -3.651545879 | 0.000303969 | 0.001829348 | no |
| PCDHB10    | -0.199048861 | -3.65039202  | 0.000305283 | 0.001836539 | no |
| B4GALT5    | 0.199046491  | 3.650346767  | 0.000305335 | 0.001836539 | no |
| MGST1      | 0.199005219  | 3.649558648  | 0.000306236 | 0.001841441 | no |
| RSC1A1     | 0.19892834   | 3.648090667  | 0.00030792  | 0.001851053 | no |
| TMEM97     | -0.198914614 | -3.647828579 | 0.000308222 | 0.001852348 | no |
| ZNF285     | -0.198870021 | -3.646977117 | 0.000309204 | 0.00185773  | no |
| KLF6       | 0.1988483    | 3.646562392  | 0.000309683 | 0.00186009  | no |
| DNAJB1     | 0.198791305  | 3.645474185  | 0.000310944 | 0.001867142 | no |
| MRPL23-AS1 | -0.198778749 | -3.645234451 | 0.000311223 | 0.001868292 | no |
| ECM2       | 0.198754595  | 3.644773292  | 0.000311759 | 0.001870989 | no |
| TRIM37     | -0.19869088  | -3.643556862 | 0.000313178 | 0.00187898  | no |
| ACADS      | 0.198674032  | 3.643235206  | 0.000313554 | 0.001880712 | no |
| MRPL47     | 0.19864918   | 3.642760757  | 0.00031411  | 0.001883519 | no |
| USO1       | 0.198633851  | 3.642468108  | 0.000314453 | 0.001885051 | no |
| MOK        | 0.198595556  | 3.641737041  | 0.000315312 | 0.001889673 | no |
| AMER3      | -0.198577372 | -3.641389897 | 0.000315721 | 0.001891595 | no |
| CDH18      | -0.198564096 | -3.641136452 | 0.000316019 | 0.001892856 | no |
| C6orf48    | -0.198557788 | -3.641016041 | 0.000316161 | 0.001893179 | no |
| C7orf55    | -0.198547613 | -3.64082179  | 0.00031639  | 0.001894024 | no |
| SDF2L1     | 0.198496363  | 3.639843463  | 0.000317547 | 0.001900418 | no |
| RTN3       | -0.198485573 | -3.639637487 | 0.000317791 | 0.001901349 | no |
| TMEM2      | 0.198445546  | 3.638873426  | 0.000318698 | 0.001906243 | no |
| DDR2       | 0.198440589  | 3.638778797  | 0.00031881  | 0.001906385 | no |
| SCN3B      | -0.198385001 | -3.637717714 | 0.000320074 | 0.001913409 | no |
| FLJ22447   | 0.198351961  | 3.637087059  | 0.000320827 | 0.001917379 | no |
| TST        | -0.198341027 | -3.636878368 | 0.000321077 | 0.001918337 | no |
| WDR63      | 0.198318652  | 3.636451288  | 0.000321588 | 0.001920456 | no |
| AEBP1      | 0.198317696  | 3.636433042  | 0.00032161  | 0.001920456 | no |
| FKBP10     | 0.19830615   | 3.636212664  | 0.000321874 | 0.001921074 | no |
| SLIT2-IT1  | 0.198305364  | 3.636197656  | 0.000321892 | 0.001921074 | no |
| EPN1       | 0.198291225  | 3.635927791  | 0.000322216 | 0.001922472 | no |
| MAFK       | 0.198266375  | 3.635453478  | 0.000322786 | 0.001925338 | no |
| ZNF572     | -0.198221812 | -3.634602936 | 0.00032381  | 0.001930913 | no |
| ZMIZ1      | -0.198211482 | -3.634405784 | 0.000324048 | 0.001931795 | no |
| ARRDC1     | 0.198175558  | 3.633720146  | 0.000324877 | 0.001936198 | no |
| ASPDH      | -0.198044853 | -3.631225701 | 0.000327908 | 0.001953722 | no |
| KIAA1755   | -0.198038635 | -3.631107035 | 0.000328053 | 0.001954044 | no |
| OCIAD1     | -0.197963777 | -3.629678484 | 0.000329802 | 0.001963719 | no |
| MESP1      | -0.197961286 | -3.629630961 | 0.00032986  | 0.001963719 | no |
| MGAT4C     | -0.19794131  | -3.629249761 | 0.000330328 | 0.001965961 | no |
| VDR        | 0.197910082  | 3.628653858  | 0.000331061 | 0.001969779 | no |
| NPLOC4     | 0.197890474  | 3.628279687  | 0.000331523 | 0.001971977 | no |
| LOC145820  | 0.197885032  | 3.628175836  | 0.000331651 | 0.001972193 | no |
| FGD5       | 0.197826811  | 3.627064896  | 0.000333024 | 0.001979322 | no |
| SYNGR1     | -0.197826394 | -3.627056927 | 0.000333034 | 0.001979322 | no |
| HOOK3      | -0.197780329 | -3.626177973 | 0.000334124 | 0.001985252 | no |
| SLC9A3     | 0.197763348  | 3.625853954  | 0.000334527 | 0.001987096 | no |
| PDGFRL     | 0.197733487  | 3.625284199  | 0.000335236 | 0.001990759 | no |
| MAPT-AS1   | -0.197724307 | -3.62510905  | 0.000335454 | 0.001991505 | no |



|              |              |              |             |             |    |
|--------------|--------------|--------------|-------------|-------------|----|
| CCDC124      | -0.197713644 | -3.624905587 | 0.000335708 | 0.001992462 | no |
| ZNF696       | -0.197665132 | -3.623980002 | 0.000336865 | 0.001998325 | no |
| STBD1        | 0.197662406  | 3.623927981  | 0.00033693  | 0.001998325 | no |
| TOB2         | -0.197660526 | -3.623892117 | 0.000336975 | 0.001998325 | no |
| PHKA2-AS1    | 0.197636794  | 3.623439328  | 0.000337542 | 0.002001138 | no |
| GINM1        | 0.197627958  | 3.623270756  | 0.000337754 | 0.00200184  | no |
| DUSP6        | 0.197596145  | 3.622663802  | 0.000338516 | 0.002005418 | no |
| ADRA1A       | -0.197594052 | -3.622623857 | 0.000338567 | 0.002005418 | no |
| UACA         | 0.197591093  | 3.622567403  | 0.000338638 | 0.002005418 | no |
| PCNT         | -0.197575452 | -3.622268999 | 0.000339013 | 0.00200709  | no |
| RPS6KB2      | 0.197548699  | 3.621758615  | 0.000339657 | 0.002010345 | no |
| PIANP        | -0.197515101 | -3.621117629 | 0.000340466 | 0.002014074 | no |
| CDKN1A       | 0.19751477   | 3.621111308  | 0.000340474 | 0.002014074 | no |
| PF4V1        | 0.197479225  | 3.620433216  | 0.000341333 | 0.002018597 | no |
| HIST1H4H     | 0.197455099  | 3.619972949  | 0.000341917 | 0.002021493 | no |
| LHFP         | 0.197448195  | 3.61984125   | 0.000342084 | 0.002021926 | no |
| ZNF253       | -0.197431224 | -3.619517487 | 0.000342495 | 0.002023801 | no |
| ZNF578       | -0.197407278 | -3.61906068  | 0.000343076 | 0.002026679 | no |
| KGFLP1       | -0.197395633 | -3.618838537 | 0.00034336  | 0.002027793 | no |
| GPR98        | -0.197388168 | -3.618696135 | 0.000343541 | 0.002028308 | no |
| LMF2         | 0.197370164  | 3.618352692  | 0.000343979 | 0.00202962  | no |
| HSF2         | -0.197368194 | -3.618315117 | 0.000344027 | 0.00202962  | no |
| RPRM         | -0.197367398 | -3.618299929 | 0.000344047 | 0.00202962  | no |
| SELM         | 0.197352208  | 3.618010169  | 0.000344417 | 0.002031246 | no |
| C19orf35     | 0.197345508  | 3.617882358  | 0.00034458  | 0.002031653 | no |
| LOC729737    | 0.19733983   | 3.617774062  | 0.000344719 | 0.002031912 | no |
| CTTN         | 0.197326771  | 3.617524939  | 0.000345038 | 0.002033234 | no |
| FAM169A      | -0.197303555 | -3.617082101 | 0.000345605 | 0.002036019 | no |
| FAM69C       | -0.197266225 | -3.616370025 | 0.000346519 | 0.002040846 | no |
| CLUH         | -0.197251048 | -3.616080525 | 0.000346892 | 0.002042479 | no |
| LINC00612    | 0.197168662  | 3.614509102  | 0.000348919 | 0.002053856 | no |
| ATP6AP2      | 0.197102776  | 3.613252437  | 0.000350549 | 0.002062883 | no |
| TMEM69       | 0.197078596  | 3.612791268  | 0.000351149 | 0.002065847 | no |
| ZNF98        | -0.19703613  | -3.611981345 | 0.000352205 | 0.002071491 | no |
| TRIM23       | -0.197030224 | -3.611868712 | 0.000352352 | 0.002071789 | no |
| LOC100507557 | -0.196982216 | -3.610953118 | 0.000353549 | 0.002078262 | no |
| LPPR5        | -0.196951026 | -3.610358275 | 0.000354329 | 0.002082278 | no |
| GEM          | 0.196927495  | 3.609909519  | 0.000354919 | 0.002085172 | no |
| RAB2A        | -0.196881803 | -3.609038151 | 0.000356066 | 0.002091342 | no |
| MAGEE1       | -0.196833931 | -3.608125236 | 0.000357272 | 0.002097851 | no |
| ABL2         | 0.196826452  | 3.607982625  | 0.000357461 | 0.002098386 | no |
| GDF15        | 0.196789303  | 3.607274224  | 0.0003584   | 0.002103323 | no |
| LOC339803    | 0.19677013   | 3.6069086    | 0.000358885 | 0.002105597 | no |
| LRRFIP2      | -0.196762407 | -3.606761343 | 0.000359081 | 0.002105752 | no |
| ZNF177       | -0.19676135  | -3.606741189 | 0.000359108 | 0.002105752 | no |
| PDZK1P1      | -0.19675506  | -3.606621244 | 0.000359267 | 0.002106113 | no |
| F3           | 0.196748905  | 3.606503878  | 0.000359423 | 0.002106351 | no |
| ARSJ         | 0.196745734  | 3.606443402  | 0.000359504 | 0.002106351 | no |
| NCAN         | -0.196739492 | -3.606324377 | 0.000359662 | 0.002106705 | no |
| PAM16        | -0.196719393 | -3.605941113 | 0.000360173 | 0.002109121 | no |
| OAZ1         | 0.196713063  | 3.605820414  | 0.000360334 | 0.002109488 | no |

|              |              |              |             |             |    |
|--------------|--------------|--------------|-------------|-------------|----|
| STMN2        | -0.196620088 | -3.604047612 | 0.000362705 | 0.002122794 | no |
| HES5         | -0.196585296 | -3.60338423  | 0.000363597 | 0.002127431 | no |
| UBL7         | -0.196543708 | -3.602591284 | 0.000364664 | 0.002133099 | no |
| FZD1         | 0.196533558  | 3.602397774  | 0.000364926 | 0.002133548 | no |
| ARMC5        | -0.196530123 | -3.602332275 | 0.000365014 | 0.002133548 | no |
| LRIG1        | -0.196529145 | -3.602313623 | 0.000365039 | 0.002133548 | no |
| SHC3         | -0.196477645 | -3.601331745 | 0.000366367 | 0.002140422 | no |
| CBR3-AS1     | 0.196475804  | 3.601296643  | 0.000366415 | 0.002140422 | no |
| SPSB3        | -0.19647173  | -3.601218961 | 0.00036652  | 0.002140456 | no |
| GTF2H5       | -0.196464503 | -3.601081177 | 0.000366707 | 0.002140964 | no |
| CHST14       | 0.19643854   | 3.600586193  | 0.000367378 | 0.002144303 | no |
| FAM106CP     | -0.196426558 | -3.600357769 | 0.000367689 | 0.002145532 | no |
| DNAL4        | -0.196392052 | -3.599699911 | 0.000368584 | 0.002150172 | no |
| PRLHR        | -0.196356648 | -3.599024961 | 0.000369504 | 0.002154957 | no |
| POLR3B       | -0.196334564 | -3.598603957 | 0.00037008  | 0.002157727 | no |
| GGTLC1       | 0.196316447  | 3.59825857   | 0.000370552 | 0.002159896 | no |
| TREML4       | 0.196259908  | 3.597180759  | 0.000372031 | 0.002167731 | no |
| ZFHX2        | -0.196257337 | -3.597131752 | 0.000372098 | 0.002167731 | no |
| JRK          | -0.196247893 | -3.596951729 | 0.000372346 | 0.002168585 | no |
| HSPA1L       | -0.196227861 | -3.596569854 | 0.000372871 | 0.002171058 | no |
| UBAP2        | -0.196217282 | -3.596368189 | 0.000373149 | 0.002171996 | no |
| LOC100130155 | -0.196214031 | -3.596306231 | 0.000373234 | 0.002171996 | no |
| WHAMM        | 0.196174122  | 3.59554548   | 0.000374284 | 0.002177517 | no |
| DNAJC6       | -0.196149488 | -3.595075909 | 0.000374934 | 0.002180705 | no |
| TFPI2        | 0.196127296  | 3.594652884  | 0.00037552  | 0.002183523 | no |
| DNAJC12      | -0.196120323 | -3.594519986 | 0.000375704 | 0.002184003 | no |
| MBOAT2       | -0.196075802 | -3.593671354 | 0.000376883 | 0.002190263 | no |
| BTG2         | 0.196048741  | 3.593155569  | 0.000377601 | 0.002193844 | no |
| ALDH6A1      | -0.195902319 | -3.590364812 | 0.000381509 | 0.00221595  | no |
| SLC9B1       | -0.195845409 | -3.589280207 | 0.000383038 | 0.00222423  | no |
| GRIA3        | -0.195817543 | -3.588749127 | 0.000383789 | 0.002227988 | no |
| DCTD         | 0.195807406  | 3.588555944  | 0.000384063 | 0.002228973 | no |
| ABCC1        | 0.195798971  | 3.588395201  | 0.00038429  | 0.002229466 | no |
| MGST2        | 0.195796576  | 3.588349551  | 0.000384355 | 0.002229466 | no |
| ANKH         | 0.195785539  | 3.588139219  | 0.000384653 | 0.002230593 | no |
| CKMT1A       | -0.195773044 | -3.58790109  | 0.000384991 | 0.00223195  | no |
| GPR35        | 0.195738904  | 3.587250493  | 0.000385915 | 0.002236706 | no |
| FLJ35946     | -0.195710916 | -3.586717131 | 0.000386675 | 0.002240502 | no |
| GUCY2C       | 0.195706027  | 3.586623958  | 0.000386807 | 0.002240668 | no |
| TMEM204      | 0.195629476  | 3.585165207  | 0.000388892 | 0.002252137 | no |
| WDR89        | -0.195597477 | -3.584555441 | 0.000389767 | 0.002256593 | no |
| GATA3        | 0.195569644  | 3.584025092  | 0.000390529 | 0.002260397 | no |
| ZNF503-AS2   | 0.195544009  | 3.583536613  | 0.000391232 | 0.002263857 | no |
| SNHG1        | -0.195488729 | -3.582483308 | 0.000392752 | 0.00227145  | no |
| PTGS1        | 0.195488614  | 3.582481115  | 0.000392755 | 0.00227145  | no |
| SULT1C2      | 0.195462026  | 3.581974505  | 0.000393489 | 0.002275078 | no |
| MAP3K11      | 0.195429106  | 3.581347263  | 0.000394398 | 0.002279724 | no |
| CD151        | 0.195407166  | 3.580929234  | 0.000395006 | 0.00228262  | no |
| CN5H6.4      | -0.195378195 | -3.580377261 | 0.000395809 | 0.002286647 | no |
| DR1          | 0.195339571  | 3.579641381  | 0.000396882 | 0.002292231 | no |
| LBP          | 0.195315924  | 3.579190852  | 0.00039754  | 0.002295417 | no |

|              |              |              |             |             |    |
|--------------|--------------|--------------|-------------|-------------|----|
| SCML2        | -0.19530596  | -3.57900102  | 0.000397818 | 0.002296403 | no |
| ZNF653       | -0.195299954 | -3.578886599 | 0.000397986 | 0.002296753 | no |
| PPARGC1A     | -0.195197781 | -3.576940091 | 0.000400845 | 0.002312634 | no |
| RIMS4        | -0.195040552 | -3.573944931 | 0.000405283 | 0.00233761  | no |
| TMEM240      | -0.195034482 | -3.57382931  | 0.000405455 | 0.002337976 | no |
| GALNT4       | 0.19502881   | 3.573721264  | 0.000405616 | 0.002338277 | no |
| CNNM2        | -0.195018905 | -3.573532588 | 0.000405897 | 0.002339271 | no |
| FBXO34       | -0.194959166 | -3.572394659 | 0.000407598 | 0.002348441 | no |
| BAP1         | -0.194943108 | -3.572088793 | 0.000408056 | 0.002350104 | no |
| VIPR2        | -0.194941391 | -3.572056084 | 0.000408105 | 0.002350104 | no |
| DBC1         | -0.194907401 | -3.571408677 | 0.000409077 | 0.002355067 | no |
| RNF103-CHMP3 | -0.194850096 | -3.570317183 | 0.00041072  | 0.002363892 | no |
| ADAM11       | -0.194838174 | -3.570090127 | 0.000411062 | 0.002365084 | no |
| C1orf95      | -0.19483523  | -3.570034056 | 0.000411147 | 0.002365084 | no |
| EGR2         | 0.194778446  | 3.568952539  | 0.000412782 | 0.002373858 | no |
| MMP10        | 0.194759164  | 3.5685853    | 0.000413339 | 0.002376424 | no |
| PPME1        | -0.194755302 | -3.568511738 | 0.000413451 | 0.002376429 | no |
| LOC440300    | -0.194749317 | -3.568397752 | 0.000413624 | 0.002376788 | no |
| CAND2        | -0.194716356 | -3.567770011 | 0.000414578 | 0.002380718 | no |
| MRPL37       | 0.194716254  | 3.567768073  | 0.000414581 | 0.002380718 | no |
| MATR3        | -0.194714208 | -3.567729106 | 0.00041464  | 0.002380718 | no |
| HIVEP3       | 0.194692675  | 3.567319002  | 0.000415264 | 0.002383666 | no |
| BMP7         | -0.194598423 | -3.565524051 | 0.000418008 | 0.002398773 | no |
| TMEM220      | 0.194566465  | 3.564915472  | 0.000418942 | 0.002403491 | no |
| FOLR3        | 0.194545078  | 3.564508188  | 0.000419568 | 0.002406441 | no |
| PANK2        | 0.194533224  | 3.56428246   | 0.000419915 | 0.002407791 | no |
| MYO9A        | -0.194513152 | -3.563900236 | 0.000420504 | 0.002410525 | no |
| ZNF433       | -0.194499963 | -3.563649079 | 0.000420892 | 0.002412102 | no |
| SMARCD3      | -0.194475656 | -3.563186215 | 0.000421606 | 0.002415554 | no |
| HDAC6        | -0.194443207 | -3.562568331 | 0.000422562 | 0.002420386 | no |
| HUWE1        | -0.19442533  | -3.562227917 | 0.00042309  | 0.002422762 | no |
| FKBP9        | 0.194412172  | 3.56197736   | 0.000423479 | 0.002424323 | no |
| OSGEPL1      | -0.194408464 | -3.561906765 | 0.000423588 | 0.002424323 | no |
| RBM4         | -0.194401515 | -3.561774447 | 0.000423794 | 0.002424853 | no |
| IL18BP       | 0.194372437  | 3.561220766  | 0.000424654 | 0.002429131 | no |
| CNTNAP5      | -0.194358654 | -3.560958321 | 0.000425063 | 0.002430821 | no |
| C11orf70     | 0.194351883  | 3.560829398  | 0.000425264 | 0.002431323 | no |
| SESN2        | 0.194345785  | 3.560713282  | 0.000425445 | 0.00243171  | no |
| PPM1K        | -0.194337325 | -3.560552196 | 0.000425696 | 0.002432444 | no |
| SLC1A1       | -0.194333837 | -3.560485782 | 0.000425799 | 0.002432444 | no |
| OTUD5        | 0.194314566  | 3.560118848  | 0.000426372 | 0.002434919 | no |
| C11orf71     | -0.19431164  | -3.560063138 | 0.000426459 | 0.002434919 | no |
| SLC8A2       | -0.194230218 | -3.558512877 | 0.000428887 | 0.002448133 | no |
| NLGN1        | -0.194163896 | -3.557250178 | 0.000430875 | 0.002458268 | no |
| MIPEP        | 0.19415958   | 3.557168003  | 0.000431005 | 0.002458268 | no |
| ATP5J        | -0.194159525 | -3.557166957 | 0.000431006 | 0.002458268 | no |
| FLNA         | 0.194140219  | 3.556799402  | 0.000431586 | 0.002460925 | no |
| JAKMIP2-AS1  | 0.194126409  | 3.556536489  | 0.000432002 | 0.002462641 | no |
| MERTK        | 0.194121229  | 3.556437871  | 0.000432158 | 0.002462876 | no |
| TRIM67       | -0.194094907 | -3.555936761 | 0.000432951 | 0.002466743 | no |
| LINC00278    | 0.194023944  | 3.554585803  | 0.000435097 | 0.002478311 | no |

|           |              |              |             |             |    |
|-----------|--------------|--------------|-------------|-------------|----|
| PPP2R5C   | -0.193979839 | -3.553746191 | 0.000436435 | 0.002485276 | no |
| LINC00239 | 0.193918654  | 3.552581462  | 0.000438298 | 0.002495224 | no |
| DOCK7     | 0.193878281  | 3.551812941  | 0.000439532 | 0.002501583 | no |
| RNF181    | 0.193817981  | 3.550665131  | 0.00044138  | 0.002511438 | no |
| ERAP2     | 0.1937696    | 3.549744223  | 0.000442868 | 0.002518755 | no |
| PIKFYVE   | -0.193765837 | -3.549672607 | 0.000442984 | 0.002518755 | no |
| MCAM      | 0.19376475   | 3.549651909  | 0.000443018 | 0.002518755 | no |
| POLR2L    | 0.193745642  | 3.549288218  | 0.000443607 | 0.002521437 | no |
| RNF150    | -0.193695757 | -3.548338729 | 0.000445149 | 0.002529531 | no |
| ANKRD18B  | -0.193678785 | -3.548015697 | 0.000445674 | 0.002531849 | no |
| LOC152225 | 0.193655615  | 3.547574707  | 0.000446393 | 0.00253526  | no |
| ZBTB7C    | 0.1936095    | 3.54669702   | 0.000447826 | 0.002542729 | no |
| KIAA1033  | 0.193591388  | 3.546352302  | 0.00044839  | 0.002545259 | no |
| MOCS2     | -0.193578963 | -3.546115838 | 0.000448777 | 0.002546785 | no |
| ZNF804A   | -0.193434855 | -3.543373306 | 0.000453293 | 0.002571731 | no |
| NKD1      | -0.193397012 | -3.542653155 | 0.000454486 | 0.002577818 | no |
| AARSD1    | -0.193389463 | -3.542509497 | 0.000454724 | 0.002577946 | no |
| DCN       | 0.193387431  | 3.54247084   | 0.000454788 | 0.002577946 | no |
| CCDC23    | 0.193384895  | 3.54242258   | 0.000454868 | 0.002577946 | no |
| C5orf47   | -0.193355935 | -3.541871487 | 0.000455784 | 0.002582453 | no |
| HIC1      | 0.193343035  | 3.541625998  | 0.000456192 | 0.002584086 | no |
| CELA1     | 0.193308385  | 3.540966643  | 0.00045729  | 0.002589625 | no |
| LOC729732 | -0.193265639 | -3.540153257 | 0.000458649 | 0.002596634 | no |
| STRN3     | -0.193239044 | -3.539647207 | 0.000459496 | 0.002600745 | no |
| BRD9      | -0.193224836 | -3.539376847 | 0.000459949 | 0.002602625 | no |
| RABL5     | 0.193184642  | 3.538612056  | 0.000461233 | 0.002609204 | no |
| MXI1      | -0.193149211 | -3.537937897 | 0.000462368 | 0.002614399 | no |
| ORM2      | 0.193148379  | 3.537922067  | 0.000462395 | 0.002614399 | no |
| SOGA1     | -0.193141324 | -3.537787834 | 0.000462621 | 0.00261499  | no |
| KCND2     | -0.193132737 | -3.537624457 | 0.000462897 | 0.00261574  | no |
| CYP39A1   | 0.193129603  | 3.537564836  | 0.000462997 | 0.00261574  | no |
| KLRD1     | 0.193045307  | 3.535960992  | 0.000465711 | 0.00263038  | no |
| C4B       | 0.193031299  | 3.535694471  | 0.000466163 | 0.002632129 | no |
| NOTCH3    | 0.193028134  | 3.535634259  | 0.000466266 | 0.002632129 | no |
| CCPG1     | 0.193016072  | 3.535404776  | 0.000466656 | 0.002633639 | no |
| COMMD8    | 0.192982755  | 3.534770909  | 0.000467734 | 0.002639033 | no |
| THEMIS    | 0.192966022  | 3.534452571  | 0.000468277 | 0.002641401 | no |
| FADS1     | -0.192955179 | -3.53424628  | 0.000468629 | 0.002642693 | no |
| TAS2R4    | -0.192945884 | -3.534069453 | 0.000468931 | 0.002643701 | no |
| PET117    | -0.1929275   | -3.533719706 | 0.000469528 | 0.002646376 | no |
| FRMD6-AS1 | -0.192919434 | -3.533566251 | 0.000469791 | 0.002647161 | no |
| MRPL43    | -0.192905749 | -3.533305909 | 0.000470236 | 0.002648977 | no |
| MGME1     | 0.192819197  | 3.531659363  | 0.000473063 | 0.002664204 | no |
| RASSF2    | -0.192806656 | -3.531420796 | 0.000473474 | 0.002665819 | no |
| COL13A1   | 0.192798758  | 3.531270561  | 0.000473733 | 0.002666579 | no |
| FAM131B   | -0.192726245 | -3.529891181 | 0.000476117 | 0.002679294 | no |
| SEMA3A    | 0.192606412  | 3.527611782  | 0.00048008  | 0.002700892 | no |
| ARSE      | 0.192575308  | 3.527020172  | 0.000481114 | 0.002706    | no |
| BLOC1S3   | 0.192500905  | 3.52560503   | 0.000483595 | 0.002719244 | no |
| IBA57     | -0.192495352 | -3.525499402 | 0.000483781 | 0.002719576 | no |
| FARSA     | -0.192486979 | -3.52534015  | 0.000484061 | 0.002720439 | no |

|              |              |              |             |             |    |
|--------------|--------------|--------------|-------------|-------------|----|
| POP4         | 0.192434654  | 3.52434499   | 0.000485815 | 0.002729581 | no |
| TPRA1        | 0.192405054  | 3.523782033  | 0.00048681  | 0.002734455 | no |
| LSM10        | 0.192390999  | 3.523514722  | 0.000487283 | 0.002736396 | no |
| LIX1L        | -0.19236826  | -3.523082267 | 0.000488049 | 0.002739983 | no |
| TMEM19       | 0.192347959  | 3.52269619   | 0.000488734 | 0.002743111 | no |
| NTSR2        | -0.192337389 | -3.522495182 | 0.00048909  | 0.002744398 | no |
| CRKL         | -0.192320787 | -3.522179449 | 0.000489652 | 0.002746829 | no |
| RPL34-AS1    | -0.192305415 | -3.5218871   | 0.000490172 | 0.002749029 | no |
| IQSEC3       | -0.19229872  | -3.521759784 | 0.000490398 | 0.002749583 | no |
| LINC00339    | 0.19228063   | 3.521415762  | 0.000491011 | 0.002752302 | no |
| FUBP3        | -0.192269401 | -3.521202223 | 0.000491392 | 0.002753719 | no |
| CCDC120      | -0.192258803 | -3.521000685 | 0.000491752 | 0.002755016 | no |
| PQBP1        | -0.192251971 | -3.520870768 | 0.000491984 | 0.002755597 | no |
| C17orf103    | 0.192223036  | 3.52032052   | 0.000492968 | 0.002760388 | no |
| MYADML2      | -0.192201928 | -3.519919118 | 0.000493687 | 0.002763693 | no |
| ZBTB44       | -0.192172383 | -3.519357294 | 0.000494694 | 0.002768613 | no |
| CPNE8        | 0.192107845  | 3.518130077  | 0.000496902 | 0.002780246 | no |
| THTPA        | -0.192097241 | -3.517928439 | 0.000497266 | 0.002781557 | no |
| ZFP37        | -0.192068416 | -3.51738035  | 0.000498256 | 0.002786368 | no |
| CUL9         | -0.192044165 | -3.516919225 | 0.00049909  | 0.002790306 | no |
| PLOD2        | 0.192033347  | 3.516713523  | 0.000499462 | 0.002790663 | no |
| SNAI3-AS1    | -0.192033134 | -3.516709481 | 0.00049947  | 0.002790663 | no |
| DHRS7        | 0.192031     | 3.516668902  | 0.000499543 | 0.002790663 | no |
| SOX4         | -0.191974444 | -3.515593557 | 0.000501495 | 0.002800839 | no |
| HNRNPF       | 0.191968446  | 3.515479506  | 0.000501702 | 0.00280127  | no |
| ANAPC13      | -0.191952433 | -3.51517505  | 0.000502257 | 0.002803636 | no |
| DUSP9        | -0.191946058 | -3.515053846 | 0.000502477 | 0.002803855 | no |
| EIF2S3       | 0.191942286  | 3.514982115  | 0.000502608 | 0.002803855 | no |
| TMEM230      | 0.191940002  | 3.514938687  | 0.000502687 | 0.002803855 | no |
| PEAK1        | -0.191905454 | -3.51428184  | 0.000503886 | 0.00280981  | no |
| CRIP3        | -0.191891465 | -3.514015862 | 0.000504372 | 0.002811791 | no |
| C11orf48     | 0.191849506  | 3.513218126  | 0.000505832 | 0.002819185 | no |
| LOC400043    | 0.191842933  | 3.51309316   | 0.000506061 | 0.002819185 | no |
| RAB3IL1      | 0.191837769  | 3.51299498   | 0.000506241 | 0.002819185 | no |
| PSME4        | 0.191836986  | 3.512980091  | 0.000506269 | 0.002819185 | no |
| EDC3         | -0.191834542 | -3.512933622 | 0.000506354 | 0.002819185 | no |
| PLK1S1       | -0.191758757 | -3.511492841 | 0.000509004 | 0.002833207 | no |
| PRPF40B      | -0.191722608 | -3.510805622 | 0.000510273 | 0.002839534 | no |
| DKFZP434I071 | -0.191689113 | -3.510168853 | 0.000511451 | 0.002845353 | no |
| LOC286186    | -0.191676512 | -3.509929303 | 0.000511895 | 0.002846428 | no |
| EFNA1        | 0.19167611   | 3.509921663  | 0.000511909 | 0.002846428 | no |
| ABHD6        | -0.191668626 | -3.509779396 | 0.000512173 | 0.002847158 | no |
| C16orf96     | -0.191655247 | -3.509525054 | 0.000512645 | 0.002849045 | no |
| SRPK2        | -0.191623287 | -3.508917517 | 0.000513774 | 0.002854581 | no |
| ARL2BP       | 0.191602359  | 3.508519682  | 0.000514515 | 0.00285758  | no |
| ZNF738       | -0.191600517 | -3.508484657 | 0.00051458  | 0.00285758  | no |
| C16orf72     | 0.191580569  | 3.508105464  | 0.000515287 | 0.002860766 | no |
| UXS1         | 0.191560983  | 3.507733152  | 0.000515982 | 0.002863885 | no |
| REEP6        | -0.191543467 | -3.507400211 | 0.000516604 | 0.002866598 | no |
| KLC1         | -0.191521435 | -3.506981409 | 0.000517387 | 0.002870205 | no |
| LAMA4        | 0.191506255  | 3.506692867  | 0.000517928 | 0.002871925 | no |

|              |              |              |             |             |    |
|--------------|--------------|--------------|-------------|-------------|----|
| NFYA         | -0.19150522  | -3.506673181 | 0.000517965 | 0.002871925 | no |
| TCTN3        | 0.19149788   | 3.506533677  | 0.000518226 | 0.002872634 | no |
| SLC37A1      | 0.191416296  | 3.504982944  | 0.000521142 | 0.002888052 | no |
| CYP27C1      | -0.19139734  | -3.504622654 | 0.000521822 | 0.002891072 | no |
| MRPS21       | -0.191384961 | -3.504387353 | 0.000522266 | 0.002892788 | no |
| ATF1         | 0.191380928  | 3.504310704  | 0.000522411 | 0.002892845 | no |
| SLC4A4       | -0.191357745 | -3.503870075 | 0.000523244 | 0.002896712 | no |
| LEPROTL1     | -0.191324725 | -3.503242484 | 0.000524433 | 0.002902546 | no |
| EIF4A2       | -0.191297681 | -3.502728491 | 0.000525408 | 0.002907196 | no |
| PIFO         | 0.19127538   | 3.50230464   | 0.000526214 | 0.002910193 | no |
| FAM167A      | -0.191275196 | -3.502301132 | 0.000526221 | 0.002910193 | no |
| TET2         | -0.191264789 | -3.502103343 | 0.000526597 | 0.002911109 | no |
| ERAS         | -0.191263126 | -3.502071741 | 0.000526657 | 0.002911109 | no |
| ARPP19       | -0.191212927 | -3.501117702 | 0.000528477 | 0.002920414 | no |
| CSMD3        | -0.191152775 | -3.499974536 | 0.000530664 | 0.002931749 | no |
| COL27A1      | 0.191133872  | 3.499615309  | 0.000531353 | 0.002934802 | no |
| AHNAK2       | 0.191129443  | 3.499531131  | 0.000531515 | 0.00293494  | no |
| PXDNL        | 0.191123053  | 3.499409692  | 0.000531748 | 0.002935474 | no |
| PLEKHG3      | -0.191112145 | -3.499202405 | 0.000532147 | 0.002936919 | no |
| UPF3A        | -0.191102636 | -3.499021703 | 0.000532494 | 0.002938082 | no |
| ACADSB       | -0.191065496 | -3.498315912 | 0.000533853 | 0.002944826 | no |
| RAB33B       | 0.191054448  | 3.49810596   | 0.000534258 | 0.002946303 | no |
| LOC731424    | 0.191048169  | 3.49798664   | 0.000534489 | 0.002946817 | no |
| SLC25A42     | -0.191007438 | -3.497212645 | 0.000535985 | 0.002954307 | no |
| STK32C       | -0.190964259 | -3.496392136 | 0.000537575 | 0.002962099 | no |
| ROM1         | 0.190961569  | 3.496341028  | 0.000537674 | 0.002962099 | no |
| CMTM5        | -0.190955808 | -3.496231549 | 0.000537886 | 0.002962511 | no |
| LRTOMT       | -0.190947056 | -3.496065238 | 0.000538209 | 0.002963162 | no |
| APBB3        | -0.190944763 | -3.496021666 | 0.000538294 | 0.002963162 | no |
| LOC100287042 | -0.190941398 | -3.495957741 | 0.000538418 | 0.002963162 | no |
| ZBTB18       | -0.190924009 | -3.495627308 | 0.000539061 | 0.002965939 | no |
| TNFRSF13C    | -0.190865844 | -3.4945221   | 0.000541215 | 0.002976423 | no |
| HFE          | 0.19086509   | 3.494507777  | 0.000541243 | 0.002976423 | no |
| SEPT5-GP1BB  | -0.190855364 | -3.494322973 | 0.000541604 | 0.002977035 | no |
| LOC728407    | -0.190854629 | -3.494309005 | 0.000541632 | 0.002977035 | no |
| TRPC3        | -0.190821993 | -3.493688907 | 0.000542845 | 0.002982941 | no |
| PRMT8        | -0.19081085  | -3.493477184 | 0.00054326  | 0.002984322 | no |
| LPP-AS2      | 0.190807782  | 3.493418892  | 0.000543374 | 0.002984322 | no |
| IGDCC3       | -0.190790103 | -3.493082973 | 0.000544033 | 0.002987177 | no |
| TSNARE1      | -0.190748114 | -3.492285193 | 0.000545601 | 0.002995021 | no |
| THAP2        | -0.190729177 | -3.491925391 | 0.000546309 | 0.002998144 | no |
| PLEKHG7      | 0.190711823  | 3.491595677  | 0.000546959 | 0.003000274 | no |
| MYBPH        | 0.190709714  | 3.491555609  | 0.000547038 | 0.003000274 | no |
| LETM1        | -0.190707636 | -3.491516129 | 0.000547116 | 0.003000274 | no |
| LOC284395    | -0.190674638 | -3.490889207 | 0.000548354 | 0.003005838 | no |
| OXR1         | -0.190673142 | -3.490860783 | 0.000548411 | 0.003005838 | no |
| SLC38A1      | -0.190667966 | -3.490762444 | 0.000548605 | 0.003006137 | no |
| SF3B2        | -0.19065747  | -3.490563029 | 0.000549    | 0.003006874 | no |
| C6orf141     | 0.190656948  | 3.490553112  | 0.000549019 | 0.003006874 | no |
| CSPG4P1Y     | -0.190606503 | -3.489594752 | 0.000550919 | 0.003016511 | no |
| SUSD2        | 0.190600025  | 3.489471683  | 0.000551164 | 0.003017081 | no |

|              |              |              |             |             |    |
|--------------|--------------|--------------|-------------|-------------|----|
| FAM134A      | -0.190565042 | -3.488807081 | 0.000552485 | 0.003023015 | no |
| CSNK1G3      | 0.19056389   | 3.488785193  | 0.000552529 | 0.003023015 | no |
| ACBD5        | -0.190534063 | -3.48821855  | 0.000553658 | 0.003028423 | no |
| CCRN4L       | 0.190513194  | 3.487822107  | 0.00055445  | 0.00303198  | no |
| PLA2G10      | -0.190477339 | -3.487140977 | 0.000555812 | 0.003038656 | no |
| CPEB3        | -0.190471448 | -3.487029074 | 0.000556036 | 0.003039109 | no |
| GGCT         | 0.19044784   | 3.486580598  | 0.000556935 | 0.003043248 | no |
| HSF2BP       | -0.190406705 | -3.485799194 | 0.000558505 | 0.003051049 | no |
| ERH          | -0.190374154 | -3.48518086  | 0.00055975  | 0.003057073 | no |
| LINC00346    | 0.190367222  | 3.4850492    | 0.000560015 | 0.003057175 | no |
| LOC644656    | -0.190366238 | -3.485030494 | 0.000560053 | 0.003057175 | no |
| OSBPL3       | 0.190311654  | 3.48399368   | 0.000562147 | 0.003067829 | no |
| PTOV1        | -0.190304314 | -3.483854245 | 0.00056243  | 0.00306859  | no |
| PLOD3        | 0.190287836  | 3.483541264  | 0.000563064 | 0.00307127  | no |
| CYP2A6       | -0.190281097 | -3.483413255 | 0.000563323 | 0.003071905 | no |
| MKRN2        | -0.190272596 | -3.483251792 | 0.000563651 | 0.003072911 | no |
| LINC00588    | 0.190267649  | 3.483157818  | 0.000563841 | 0.003073171 | no |
| TSC2         | -0.190245697 | -3.482740867 | 0.000564688 | 0.003077006 | no |
| NOTCH1       | -0.190229972 | -3.482442191 | 0.000565295 | 0.003079534 | no |
| PHOSPHO2-KLH | -0.190225158 | -3.482350742 | 0.000565481 | 0.003079767 | no |
| TEX40        | -0.190219534 | -3.482243924 | 0.000565699 | 0.003080171 | no |
| ZNF727       | -0.19021038  | -3.482070053 | 0.000566053 | 0.003081318 | no |
| IFRD2        | 0.190191073  | 3.481703351  | 0.0005668   | 0.003084604 | no |
| GPR75-ASB3   | -0.190167972 | -3.481264589 | 0.000567696 | 0.003088695 | no |
| ZC2HC1A      | -0.190161968 | -3.481150557 | 0.000567929 | 0.003088948 | no |
| KLHL21       | 0.190159368  | 3.481101165  | 0.000568029 | 0.003088948 | no |
| DMRT3        | 0.190134766  | 3.480633915  | 0.000568985 | 0.003093361 | no |
| VAV1         | 0.190122636  | 3.480403523  | 0.000569457 | 0.003095143 | no |
| DUSP11       | 0.190116193  | 3.480281161  | 0.000569707 | 0.003095619 | no |
| AKIRIN1      | 0.190112982  | 3.480220168  | 0.000569832 | 0.003095619 | no |
| CTNND2       | -0.190075178 | -3.479502186 | 0.000571306 | 0.003102838 | no |
| GIPC3        | 0.190037088  | 3.478778788  | 0.000572794 | 0.003110134 | no |
| FEZ1         | -0.190001127 | -3.478095828 | 0.000574202 | 0.003116992 | no |
| JDP2         | 0.189969479  | 3.477494816  | 0.000575444 | 0.003122945 | no |
| LRFN5        | -0.189942494 | -3.476982337 | 0.000576505 | 0.003127913 | no |
| FBXL22       | -0.18989076  | -3.475999894 | 0.000578544 | 0.003138183 | no |
| GABRD        | -0.189886283 | -3.475914888 | 0.00057872  | 0.003138349 | no |
| ELMOD2       | 0.189880699  | 3.475808842  | 0.000578941 | 0.003138753 | no |
| DLL3         | -0.189859058 | -3.475397886 | 0.000579796 | 0.003142598 | no |
| NR4A2        | 0.18982921   | 3.474831093  | 0.000580978 | 0.003147624 | no |
| BCL2A1       | 0.189828242  | 3.474812698  | 0.000581016 | 0.003147624 | no |
| POLDIP3      | -0.189771174 | -3.473729047 | 0.000583282 | 0.003159103 | no |
| APBA2        | -0.189759963 | -3.473516148 | 0.000583728 | 0.003160384 | no |
| RPL4         | -0.18975784  | -3.473475836 | 0.000583813 | 0.003160384 | no |
| PPP2R2C      | -0.189750766 | -3.473341528 | 0.000584095 | 0.003161112 | no |
| PSAT1        | -0.189735154 | -3.473045075 | 0.000584717 | 0.003163682 | no |
| LRP11        | -0.189711569 | -3.47259724  | 0.000585658 | 0.003167208 | no |
| ACTR2        | 0.189711435  | 3.472594692  | 0.000585663 | 0.003167208 | no |
| RNF187       | -0.189655632 | -3.471535117 | 0.000587895 | 0.003178478 | no |
| ERP27        | 0.189646158  | 3.471355234  | 0.000588275 | 0.003179731 | no |
| FEM1A        | -0.189632542 | -3.471096705 | 0.000588821 | 0.003181883 | no |

|              |              |              |             |             |    |
|--------------|--------------|--------------|-------------|-------------|----|
| CNTN1        | -0.189622507 | -3.47090617  | 0.000589224 | 0.003183259 | no |
| EP400        | -0.189610041 | -3.470669492 | 0.000589724 | 0.003185163 | no |
| C1QTNF4      | -0.189603633 | -3.47054782  | 0.000589982 | 0.003185754 | no |
| ARFIP1       | 0.189570924  | 3.469926783  | 0.000591298 | 0.003192059 | no |
| TMEM121      | -0.189505683 | -3.468688112 | 0.000593932 | 0.003204823 | no |
| CTSK         | 0.189504961  | 3.468674403  | 0.000593961 | 0.003204823 | no |
| PABPC5       | -0.189501113 | -3.468601357 | 0.000594116 | 0.003204858 | no |
| USH1C        | -0.189478196 | -3.468166264 | 0.000595044 | 0.003209058 | no |
| C15orf52     | 0.189422199  | 3.467103153  | 0.000597317 | 0.003220508 | no |
| CMTM3        | 0.189398784  | 3.466658617  | 0.00059827  | 0.003224836 | no |
| ZBTB80S      | 0.189337282  | 3.465491064  | 0.000600779 | 0.003236915 | no |
| ATL1         | -0.189334014 | -3.465429015 | 0.000600913 | 0.003236915 | no |
| CDK17        | -0.189332797 | -3.465405911 | 0.000600963 | 0.003236915 | no |
| NGRN         | -0.189326007 | -3.465277017 | 0.000601241 | 0.003237093 | no |
| MRPL48       | -0.189324626 | -3.465250803 | 0.000601297 | 0.003237093 | no |
| FOXN3-AS1    | 0.189313487  | 3.465039347  | 0.000601753 | 0.003237761 | no |
| ALPK3        | 0.189312739  | 3.465025147  | 0.000601784 | 0.003237761 | no |
| CRYL1        | -0.189310553 | -3.464983645 | 0.000601873 | 0.003237761 | no |
| LOC100129518 | -0.189302664 | -3.464833878 | 0.000602196 | 0.003238688 | no |
| DEPDC5       | -0.18925607  | -3.463949374 | 0.000604108 | 0.003247451 | no |
| TREX2        | 0.189255589  | 3.463940254  | 0.000604128 | 0.003247451 | no |
| HECW1        | -0.189194384 | -3.462778421 | 0.000606648 | 0.003260181 | no |
| MYLK-AS1     | -0.189176569 | -3.46244026  | 0.000607383 | 0.003263316 | no |
| GALNT7       | 0.189163875  | 3.4621993    | 0.000607907 | 0.003265317 | no |
| APOC1P1      | 0.189159113  | 3.46210892   | 0.000608104 | 0.003265558 | no |
| RAB9B        | -0.189109829 | -3.461173416 | 0.000610145 | 0.003275699 | no |
| C6orf203     | -0.189078495 | -3.46057867  | 0.000611445 | 0.003281862 | no |
| ING5         | -0.189071999 | -3.460455363 | 0.000611715 | 0.003282491 | no |
| RASGRF1      | -0.189061233 | -3.460251023 | 0.000612163 | 0.003284073 | no |
| ZNF563       | 0.18903148   | 3.459686291  | 0.000613402 | 0.003289898 | no |
| ARMCX1       | -0.189008257 | -3.459245509 | 0.00061437  | 0.00329427  | no |
| MTMR11       | 0.188957913  | 3.458289991  | 0.000616475 | 0.00330473  | no |
| MFSD6        | -0.188937306 | -3.457898891 | 0.000617338 | 0.003308533 | no |
| UBL3         | -0.188896879 | -3.457131612 | 0.000619035 | 0.003316801 | no |
| R3HCC1       | -0.188886131 | -3.456927633 | 0.000619487 | 0.003317685 | no |
| FBLN5        | 0.18888339   | 3.456875607  | 0.000619602 | 0.003317685 | no |
| SLC03A1      | 0.188881939  | 3.456848065  | 0.000619664 | 0.003317685 | no |
| KLHDC2       | -0.188873692 | -3.456691561 | 0.000620011 | 0.003318263 | no |
| SLC25A45     | 0.188872036  | 3.456660125  | 0.00062008  | 0.003318263 | no |
| ME2          | 0.188855392  | 3.456344243  | 0.000620781 | 0.003321188 | no |
| GALNT9       | -0.188848608 | -3.456215507 | 0.000621067 | 0.00332189  | no |
| IL17RE       | 0.188803337  | 3.455356341  | 0.000622978 | 0.003331284 | no |
| PCBD1        | 0.188763111  | 3.454592945  | 0.000624681 | 0.003339558 | no |
| ZNF354C      | -0.188757124 | -3.454479326 | 0.000624935 | 0.003340084 | no |
| USP32P2      | -0.188689294 | -3.453192129 | 0.000627817 | 0.003354654 | no |
| CPT2         | 0.188683776  | 3.453087411  | 0.000628052 | 0.003355076 | no |
| C22orf34     | 0.188655035  | 3.452542011  | 0.000629278 | 0.003360786 | no |
| MBLAC2       | -0.188640689 | -3.452269779 | 0.00062989  | 0.003362741 | no |
| NR3C2        | -0.188637899 | -3.452216837 | 0.000630009 | 0.003362741 | no |
| CAHM         | -0.188635472 | -3.452170775 | 0.000630113 | 0.003362741 | no |
| ZP3          | 0.188584389  | 3.451201449  | 0.000632299 | 0.003373569 | no |



|              |              |              |             |             |    |
|--------------|--------------|--------------|-------------|-------------|----|
| SEPNI        | 0.188569516  | 3.45091922   | 0.000632937 | 0.003376134 | no |
| ZNF236       | -0.188561204 | -3.450761514 | 0.000633293 | 0.003377198 | no |
| KRT7         | 0.188491747  | 3.449443582  | 0.000636281 | 0.003392291 | no |
| PLVAP        | 0.188457318  | 3.44879032   | 0.000637767 | 0.00339937  | no |
| RBM4B        | -0.188439095 | -3.448444553 | 0.000638555 | 0.003402725 | no |
| MORC2        | -0.188435214 | -3.448370915 | 0.000638723 | 0.003402776 | no |
| PVRL3-AS1    | -0.188372719 | -3.447185161 | 0.000641432 | 0.003416362 | no |
| PYGB         | -0.188351916 | -3.446790478 | 0.000642337 | 0.00342033  | no |
| DAZAP1       | 0.188338105  | 3.446528444  | 0.000642937 | 0.003422682 | no |
| LTF          | 0.188334334  | 3.446456891  | 0.000643102 | 0.003422709 | no |
| FBXL20       | -0.188273122 | -3.445295557 | 0.000645772 | 0.00343607  | no |
| TMED4        | 0.188269155  | 3.445220306  | 0.000645945 | 0.003436141 | no |
| RREB1        | 0.188247497  | 3.444809408  | 0.000646893 | 0.003440001 | no |
| C11orf91     | 0.188245256  | 3.44476689   | 0.000646991 | 0.003440001 | no |
| ADRA2B       | 0.18822794   | 3.444438387  | 0.00064775  | 0.003443182 | no |
| LOC100505648 | -0.188224244 | -3.44436827  | 0.000647912 | 0.003443192 | no |
| TEX9         | 0.188208313  | 3.444066033  | 0.00064861  | 0.003446053 | no |
| TMCC2        | -0.188106823 | -3.442140712 | 0.000653078 | 0.003468935 | no |
| ABHD14A      | -0.188089272 | -3.441807762 | 0.000653854 | 0.003472196 | no |
| USP9X        | 0.188045169  | 3.440971135  | 0.000655807 | 0.003481705 | no |
| RTF1         | -0.188031193 | -3.440706029 | 0.000656427 | 0.003484136 | no |
| DUSP5        | 0.187996603  | 3.44004989   | 0.000657963 | 0.003491429 | no |
| RAB3B        | -0.187942025 | -3.439014613 | 0.000660395 | 0.003502849 | no |
| GPR56        | -0.187940979 | -3.438994782 | 0.000660441 | 0.003502849 | no |
| ACTR1A       | -0.187882708 | -3.437889497 | 0.000663046 | 0.003515798 | no |
| ENG          | 0.187873299  | 3.437711027  | 0.000663468 | 0.003517166 | no |
| DNAJC4       | 0.187852208  | 3.437310998  | 0.000664414 | 0.003521311 | no |
| UQCRC1       | -0.187831448 | -3.436917228 | 0.000665346 | 0.003525382 | no |
| LOC100130451 | -0.187810255 | -3.43651527  | 0.000666299 | 0.003529561 | no |
| HEATR2       | 0.187792733  | 3.436182938  | 0.000667088 | 0.003532868 | no |
| ZNF185       | 0.187784064  | 3.436018506  | 0.000667478 | 0.003534066 | no |
| KIAA1328     | -0.187764933 | -3.435655663 | 0.000668341 | 0.003537432 | no |
| LINC00263    | -0.187762667 | -3.435612683 | 0.000668443 | 0.003537432 | no |
| BAHCC1       | -0.187745055 | -3.435278653 | 0.000669238 | 0.003540629 | no |
| ZNF714       | -0.18774199  | -3.43522052  | 0.000669377 | 0.003540629 | no |
| ZNF830       | -0.1877098   | -3.434610005 | 0.000670833 | 0.003547458 | no |
| TAF4         | -0.187702019 | -3.434462445 | 0.000671185 | 0.003548448 | no |
| NAP1L2       | -0.187625445 | -3.433010196 | 0.000674662 | 0.003565953 | no |
| CBR3         | 0.18761748   | 3.432859135  | 0.000675025 | 0.003566799 | no |
| GPT          | -0.18761417  | -3.432796377 | 0.000675175 | 0.003566799 | no |
| CTCF         | -0.187610994 | -3.432736146 | 0.00067532  | 0.003566799 | no |
| PRRT1        | -0.187533881 | -3.431273754 | 0.000678842 | 0.003584517 | no |
| HIST2H2BA    | 0.187507606  | 3.430775476  | 0.000680045 | 0.003589991 | no |
| FBXL16       | -0.187465059 | -3.429968655 | 0.000681999 | 0.003599419 | no |
| LOC283174    | -0.187460645 | -3.42988495  | 0.000682202 | 0.003599606 | no |
| KCNJ9        | -0.187452215 | -3.429725094 | 0.000682589 | 0.003600768 | no |
| MOSPD1       | 0.187394679  | 3.428634069  | 0.000685241 | 0.00361387  | no |
| SYP          | -0.187380571 | -3.428366546 | 0.000685893 | 0.00361642  | no |
| PDCL         | -0.187374945 | -3.428259878 | 0.000686153 | 0.003616904 | no |
| ERAL1        | -0.187369912 | -3.428164431 | 0.000686386 | 0.003617243 | no |
| FXVD2        | 0.187350418  | 3.427794797  | 0.000687288 | 0.003621109 | no |

|           |              |              |             |             |    |
|-----------|--------------|--------------|-------------|-------------|----|
| AFF3      | -0.187326598 | -3.427343126 | 0.000688392 | 0.003626035 | no |
| VAT1      | 0.187316496  | 3.427151583  | 0.00068886  | 0.003627614 | no |
| KCNK7     | -0.187310911 | -3.427045685 | 0.000689119 | 0.00362809  | no |
| BCCIP     | -0.187291864 | -3.42668453  | 0.000690004 | 0.003631858 | no |
| PQLC1     | 0.187276539  | 3.426393945  | 0.000690717 | 0.003634718 | no |
| CRTAC1    | -0.187255527 | -3.425995538 | 0.000691695 | 0.003638523 | no |
| OTUD7A    | -0.187253731 | -3.425961489 | 0.000691778 | 0.003638523 | no |
| KRBA2     | -0.187248892 | -3.425869746 | 0.000692004 | 0.003638818 | no |
| NKX3-1    | 0.187173978  | 3.424449356  | 0.000695503 | 0.003656322 | no |
| MTRNR2L6  | -0.187168501 | -3.424345512 | 0.000695759 | 0.003656776 | no |
| SLC30A1   | 0.187135009  | 3.423710521  | 0.000697329 | 0.003664132 | no |
| LMAN2     | 0.187122733  | 3.423477781  | 0.000697905 | 0.003666263 | no |
| MBD5      | -0.187116291 | -3.423355635 | 0.000698208 | 0.003666957 | no |
| CTSH      | 0.187098462  | 3.423017619  | 0.000699046 | 0.003670462 | no |
| UBXN11    | 0.187079369  | 3.422655637  | 0.000699945 | 0.003674282 | no |
| NRBF2     | 0.187044435  | 3.42199335   | 0.000701591 | 0.003681702 | no |
| MIR143HG  | 0.187039054  | 3.421891331  | 0.000701845 | 0.003681702 | no |
| TMEM60    | 0.187038489  | 3.421880618  | 0.000701872 | 0.003681702 | no |
| KIAA2026  | -0.186969228 | -3.420567571 | 0.000705149 | 0.003697989 | no |
| RGN       | 0.186949818  | 3.420199616  | 0.00070607  | 0.003701915 | no |
| TWF1      | -0.186936503 | -3.419947203 | 0.000706702 | 0.003704326 | no |
| HEXIM2    | -0.186912465 | -3.419491497 | 0.000707845 | 0.003709413 | no |
| IMMP1L    | -0.186900862 | -3.419271555 | 0.000708397 | 0.003711402 | no |
| TP53INP1  | 0.186892888  | 3.419120381  | 0.000708777 | 0.003712487 | no |
| TIMD4     | 0.186869858  | 3.418683822  | 0.000709875 | 0.003717331 | no |
| ZMYM3     | -0.186848925 | -3.418287013 | 0.000710874 | 0.003721108 | no |
| TNFSF15   | 0.186847498  | 3.41825995   | 0.000710943 | 0.003721108 | no |
| C5orf56   | 0.186746323  | 3.416342114  | 0.000715792 | 0.003745575 | no |
| HS6ST1    | 0.186704023  | 3.415540333  | 0.000717828 | 0.003755316 | no |
| ZSWIM5    | -0.186695657 | -3.415381752 | 0.000718231 | 0.003756511 | no |
| UAP1      | 0.186665434  | 3.414808906  | 0.00071969  | 0.003763226 | no |
| NR2C2     | -0.186627635 | -3.41409245  | 0.000721519 | 0.00377187  | no |
| C1GALT1C1 | 0.186614785  | 3.4138489    | 0.000722141 | 0.003774206 | no |
| EIF4B     | -0.186600622 | -3.413580456 | 0.000722828 | 0.003776877 | no |
| LOC284454 | 0.186571807  | 3.41303432   | 0.000724227 | 0.003783268 | no |
| WBP5      | 0.186557351  | 3.412760337  | 0.00072493  | 0.003786019 | no |
| ZNF280B   | -0.186545375 | -3.41253335  | 0.000725513 | 0.003788143 | no |
| HDAC10    | 0.186499999  | 3.41167336   | 0.000727725 | 0.003798769 | no |
| WARS2     | 0.186486526  | 3.411418017  | 0.000728383 | 0.00380128  | no |
| NYAP2     | -0.186457695 | -3.410871622 | 0.000729793 | 0.003807713 | no |
| PRR14L    | -0.186452778 | -3.410778421 | 0.000730033 | 0.003808045 | no |
| NR1H3     | -0.186398095 | -3.409742094 | 0.000732715 | 0.003821106 | no |
| LSM11     | -0.186381161 | -3.409421182 | 0.000733547 | 0.003824519 | no |
| CD27-AS1  | -0.18636954  | -3.409200951 | 0.000734119 | 0.003826571 | no |
| PLEKHA2   | 0.186356448  | 3.40895285   | 0.000734764 | 0.003829002 | no |
| DNAJC21   | 0.186352722  | 3.408882233  | 0.000734947 | 0.00382903  | no |
| CPD       | 0.186340337  | 3.408647529  | 0.000735558 | 0.003831281 | no |
| MEG3      | -0.186333586 | -3.408519591 | 0.00073589  | 0.003831672 | no |
| HIGD1A    | -0.186331424 | -3.408478632 | 0.000735997 | 0.003831672 | no |
| ZBTB12    | -0.186327972 | -3.408413218 | 0.000736167 | 0.003831672 | no |
| RSRC2     | -0.186269704 | -3.407309027 | 0.000739048 | 0.003845731 | no |

|              |              |              |             |             |    |
|--------------|--------------|--------------|-------------|-------------|----|
| PELI2        | -0.186263647 | -3.407194236 | 0.000739348 | 0.003846361 | no |
| FOXC2        | 0.186259946  | 3.40712411   | 0.000739531 | 0.003846384 | no |
| NUAK2        | 0.186256323  | 3.40705545   | 0.00073971  | 0.003846387 | no |
| TPM1         | -0.186247902 | -3.406895878 | 0.000740128 | 0.003847626 | no |
| PRKG1-AS1    | 0.186238085  | 3.406709862  | 0.000740615 | 0.003849226 | no |
| ARHGAP1      | 0.186208949  | 3.406157737  | 0.000742062 | 0.003854947 | no |
| ARFGAP2      | -0.186208697 | -3.406152973 | 0.000742074 | 0.003854947 | no |
| HID1         | -0.186201103 | -3.406009079 | 0.000742452 | 0.003855976 | no |
| PANK1        | -0.186189561 | -3.405790354 | 0.000743026 | 0.003858026 | no |
| C12orf73     | -0.186159876 | -3.405227873 | 0.000744505 | 0.00386477  | no |
| YEATS2       | -0.186145092 | -3.404947738 | 0.000745242 | 0.003867663 | no |
| PACRGL       | -0.186135993 | -3.404775324 | 0.000745696 | 0.003869086 | no |
| LOC100132356 | -0.186129656 | -3.404655243 | 0.000746013 | 0.003869794 | no |
| FAM106A      | -0.186077714 | -3.403671055 | 0.000748611 | 0.003881755 | no |
| SH2D3A       | 0.186076351  | 3.40364522   | 0.00074868  | 0.003881755 | no |
| FGD1         | -0.186034263 | -3.402847761 | 0.000750792 | 0.003891766 | no |
| STXBP5L      | -0.186007354 | -3.402337907 | 0.000752145 | 0.00389784  | no |
| C6orf170     | -0.185990149 | -3.402011939 | 0.000753011 | 0.003901389 | no |
| ELP5         | -0.18596271  | -3.40149205  | 0.000754395 | 0.003907615 | no |
| SPATA17      | 0.185932313  | 3.400916139  | 0.00075593  | 0.003914626 | no |
| FOXO3B       | -0.185925247 | -3.400782279 | 0.000756288 | 0.003915533 | no |
| C5orf54      | -0.185898379 | -3.400273239 | 0.000757648 | 0.00392163  | no |
| ARHGAP35     | -0.18587936  | -3.399912907 | 0.000758612 | 0.003925676 | no |
| DROSHA       | -0.185870831 | -3.399751317 | 0.000759045 | 0.00392697  | no |
| URM1         | -0.185864713 | -3.399635416 | 0.000759355 | 0.003927631 | no |
| ANGPTL5      | 0.185784918  | 3.398123706  | 0.000763417 | 0.003947689 | no |
| 38777        | -0.185767227 | -3.397788543 | 0.00076432  | 0.003951409 | no |
| MALL         | 0.185736307  | 3.397202793  | 0.000765901 | 0.003958629 | no |
| XRN2         | 0.185704711  | 3.396604258  | 0.00076752  | 0.003966041 | no |
| C18orf32     | -0.185647922 | -3.39552848  | 0.000770437 | 0.003979203 | no |
| TUBB4A       | -0.185646259 | -3.395496978 | 0.000770523 | 0.003979203 | no |
| SPATA25      | -0.185640319 | -3.395384455 | 0.000770828 | 0.003979203 | no |
| MBP          | 0.185638383  | 3.395347785  | 0.000770928 | 0.003979203 | no |
| IGIP         | -0.185637128 | -3.395324004 | 0.000770993 | 0.003979203 | no |
| MEGF11       | -0.185620879 | -3.395016197 | 0.00077183  | 0.003982567 | no |
| TMEM178A     | -0.18561051  | -3.394819788 | 0.000772364 | 0.003984369 | no |
| DSEL         | -0.185581759 | -3.394275177 | 0.000773849 | 0.003991068 | no |
| TTPA         | -0.185536935 | -3.393426107 | 0.000776168 | 0.004002069 | no |
| AQP9         | 0.18550563   | 3.392833137  | 0.000777791 | 0.004009342 | no |
| PAFAH1B3     | -0.185502545 | -3.392774713 | 0.000777952 | 0.004009342 | no |
| PSMB2        | 0.185467469  | 3.392110331  | 0.000779775 | 0.004017775 | no |
| HDHD2        | -0.18545816  | -3.391934013 | 0.000780259 | 0.004019308 | no |
| MAPK11       | -0.185447096 | -3.391724452 | 0.000780836 | 0.004021312 | no |
| ADRBK2       | -0.185439221 | -3.391575284 | 0.000781246 | 0.004022462 | no |
| LARS2        | -0.185423623 | -3.39127985  | 0.000782059 | 0.004025501 | no |
| OR51E1       | 0.185420721  | 3.391224885  | 0.000782211 | 0.004025501 | no |
| SDS          | 0.18540356   | 3.390899841  | 0.000783107 | 0.004026794 | no |
| NRP2         | 0.185403515  | 3.390898996  | 0.000783109 | 0.004026794 | no |
| TCF20        | -0.185402849 | -3.390886373 | 0.000783144 | 0.004026794 | no |
| NCALD        | -0.185401554 | -3.390861861 | 0.000783212 | 0.004026794 | no |
| PHAX         | -0.185376811 | -3.390393215 | 0.000784505 | 0.004031724 | no |

|              |              |              |             |             |    |
|--------------|--------------|--------------|-------------|-------------|----|
| CRB1         | -0.185376041 | -3.39037863  | 0.000784546 | 0.004031724 | no |
| POLB         | -0.185358922 | -3.390054395 | 0.000785442 | 0.004035365 | no |
| HTR1A        | -0.185350813 | -3.389900806 | 0.000785867 | 0.004036018 | no |
| ARRDC4       | 0.185349331  | 3.389872739  | 0.000785945 | 0.004036018 | no |
| TNFRSF10B    | 0.18531095   | 3.38914582   | 0.000787959 | 0.004045394 | no |
| AP1S3        | 0.185264221  | 3.388260826  | 0.000790417 | 0.004057048 | no |
| GNE          | -0.185242319 | -3.387846035 | 0.000791572 | 0.004062005 | no |
| GAN          | -0.185209333 | -3.387221332 | 0.000793314 | 0.004069973 | no |
| COL6A3       | 0.185202161  | 3.387085492  | 0.000793694 | 0.004070947 | no |
| HOMER1       | -0.185178171 | -3.386631168 | 0.000794963 | 0.004076487 | no |
| PHF6         | -0.185116686 | -3.385466802 | 0.000798226 | 0.004091363 | no |
| TM9SF2       | 0.185114291  | 3.385421439  | 0.000798354 | 0.004091363 | no |
| FAM199X      | -0.185109978 | -3.385339777 | 0.000798583 | 0.004091363 | no |
| MS4A2        | 0.185109176  | 3.385324572  | 0.000798626 | 0.004091363 | no |
| HSDL1        | -0.185073114 | -3.38464168  | 0.000800546 | 0.004100224 | no |
| SETD5-AS1    | -0.185063089 | -3.384451839 | 0.000801081 | 0.004101985 | no |
| SCN3A        | -0.185012226 | -3.383488668 | 0.000803799 | 0.004114921 | no |
| PEG3         | -0.184997615 | -3.383211992 | 0.000804581 | 0.004117944 | no |
| PLD6         | -0.184990313 | -3.383073732 | 0.000804972 | 0.004118966 | no |
| CECR6        | -0.184979903 | -3.382876614 | 0.00080553  | 0.00412084  | no |
| CX3CR1       | 0.184945325  | 3.382221855  | 0.000807386 | 0.004129352 | no |
| NOL12        | -0.184939949 | -3.382120062 | 0.000807675 | 0.004129847 | no |
| CYP17A1      | -0.184924796 | -3.381833143 | 0.00080849  | 0.00413303  | no |
| DNM3         | -0.184898795 | -3.3813408   | 0.00080989  | 0.004138413 | no |
| CSK          | 0.184898088  | 3.381327423  | 0.000809928 | 0.004138413 | no |
| LOC254128    | -0.184856397 | -3.380538013 | 0.000812178 | 0.004148922 | no |
| FAM198B      | 0.184840478  | 3.3802366    | 0.000813038 | 0.00415233  | no |
| LOC100506343 | -0.184824474 | -3.379933577 | 0.000813904 | 0.004155765 | no |
| LOC442497    | 0.184793035  | 3.379338323  | 0.000815608 | 0.004163475 | no |
| TPMT         | 0.184789073  | 3.379263307  | 0.000815823 | 0.004163583 | no |
| EMID1        | 0.184737987  | 3.378296066  | 0.000818599 | 0.004176758 | no |
| PFAS         | -0.184620579 | -3.376073239 | 0.000825012 | 0.004208248 | no |
| C9orf129     | -0.184617836 | -3.376021312 | 0.000825162 | 0.004208248 | no |
| RPS23        | -0.184604975 | -3.375777831 | 0.000825867 | 0.004210846 | no |
| POU4F1-AS1   | -0.18458051  | -3.375314682 | 0.000827211 | 0.004216695 | no |
| BCAR1        | -0.184547127 | -3.374682692 | 0.000829047 | 0.004224768 | no |
| LOC100302640 | -0.184543152 | -3.374607446 | 0.000829266 | 0.004224768 | no |
| ETV1         | -0.184541005 | -3.374566795 | 0.000829384 | 0.004224768 | no |
| UBE2Q2P2     | -0.184527425 | -3.374309716 | 0.000830133 | 0.004227579 | no |
| MGAT5B       | -0.184511676 | -3.374011571 | 0.000831001 | 0.004231    | no |
| ZNF501       | -0.18450145  | -3.373817992 | 0.000831566 | 0.004232242 | no |
| ASCL5        | -0.184500122 | -3.373792854 | 0.000831639 | 0.004232242 | no |
| ZNF720       | -0.184418244 | -3.372242902 | 0.000836172 | 0.004253767 | no |
| MRPS10       | 0.184415868  | 3.372197917  | 0.000836304 | 0.004253767 | no |
| CSRP2BP      | -0.184413011 | -3.37214384  | 0.000836463 | 0.004253767 | no |
| NAV1         | -0.184375523 | -3.371434218 | 0.000838546 | 0.004263355 | no |
| LINC00663    | -0.184316805 | -3.370322741 | 0.00084182  | 0.004278846 | no |
| UBQLN2       | -0.18431018  | -3.370197338 | 0.00084219  | 0.004278846 | no |
| HCG4B        | 0.184310164  | 3.37019704   | 0.000842191 | 0.004278846 | no |
| RRP36        | 0.184287188  | 3.369762152  | 0.000843475 | 0.00428436  | no |
| JAKMIP1      | -0.184245416 | -3.368971489 | 0.000845815 | 0.004295231 | no |

|              |              |              |             |             |    |
|--------------|--------------|--------------|-------------|-------------|----|
| SLC25A20     | 0.184233249  | 3.368741199  | 0.000846498 | 0.004297683 | no |
| NDUFA6       | -0.184225611 | -3.368596621 | 0.000846927 | 0.004298356 | no |
| ACER2        | 0.184223762  | 3.368561629  | 0.000847031 | 0.004298356 | no |
| CASK         | -0.184050421 | -3.365280872 | 0.000856819 | 0.004346999 | no |
| FAM200B      | -0.184023972 | -3.364780302 | 0.000858321 | 0.004353595 | no |
| ELAVL2       | -0.184015346 | -3.364617058 | 0.000858812 | 0.004355055 | no |
| LRRC29       | 0.183976439  | 3.363880739  | 0.000861028 | 0.004365263 | no |
| TNKS1BP1     | 0.183969074  | 3.363741353  | 0.000861448 | 0.004366362 | no |
| ITM2B        | 0.18395072   | 3.363394024  | 0.000862495 | 0.004370641 | no |
| NECAP2       | 0.183935006  | 3.363096634  | 0.000863393 | 0.00437416  | no |
| EXOC3L2      | 0.183885142  | 3.362152995  | 0.000866248 | 0.00438759  | no |
| LOC344887    | 0.183809917  | 3.360729484  | 0.000870572 | 0.004408449 | no |
| SNHG8        | -0.183779781 | -3.360159227 | 0.000872309 | 0.004416208 | no |
| BEND7        | -0.183773601 | -3.360042289 | 0.000872666 | 0.004416973 | no |
| CCDC144B     | -0.183756592 | -3.359720435 | 0.000873649 | 0.004420905 | no |
| LOC652276    | -0.183696849 | -3.358589972 | 0.000877108 | 0.004436897 | no |
| PCDH7        | -0.183694882 | -3.358552747 | 0.000877222 | 0.004436897 | no |
| GFRA1        | -0.183678968 | -3.358251618 | 0.000878146 | 0.004440524 | no |
| FPR2         | 0.183673153  | 3.358141594  | 0.000878483 | 0.004441186 | no |
| SLC6A8       | -0.183668889 | -3.358060917 | 0.000878731 | 0.004441394 | no |
| ACVR2B-AS1   | -0.18365896  | -3.357873034 | 0.000879308 | 0.004443266 | no |
| BRWD3        | -0.183639613 | -3.357506969 | 0.000880434 | 0.004447907 | no |
| LOC100128750 | 0.183635834  | 3.357435463  | 0.000880654 | 0.004447973 | no |
| SAMM50       | -0.183615707 | -3.357054645 | 0.000881826 | 0.004452849 | no |
| CLTA         | -0.183578176 | -3.356344533 | 0.000884016 | 0.00446286  | no |
| SND1-IT1     | -0.183566787 | -3.356129036 | 0.000884682 | 0.004464852 | no |
| CBX1         | -0.183564317 | -3.356082306 | 0.000884826 | 0.004464852 | no |
| RPL23AP82    | 0.183442901  | 3.353785143  | 0.000891953 | 0.004499755 | no |
| WBP4         | -0.183401246 | -3.352997081 | 0.00089441  | 0.004510601 | no |
| LOC643733    | 0.183399338  | 3.352960984  | 0.000894522 | 0.004510601 | no |
| SNAP91       | -0.183362864 | -3.352270954 | 0.000896679 | 0.004520416 | no |
| APOC1        | 0.183341243  | 3.351861932  | 0.00089796  | 0.004525811 | no |
| DPP10        | -0.183301283 | -3.351105977 | 0.000900331 | 0.0045367   | no |
| C8orf44-SGK3 | -0.183291784 | -3.350926274 | 0.000900896 | 0.004538481 | no |
| LPIN3        | 0.18325809   | 3.350288872  | 0.000902901 | 0.004547517 | no |
| DLC1         | 0.183238244  | 3.349913442  | 0.000904085 | 0.004552409 | no |
| GREB1L       | -0.183230179 | -3.34976088  | 0.000904566 | 0.004553765 | no |
| GLUD1P3      | -0.183204277 | -3.34927091  | 0.000906113 | 0.004559017 | no |
| TMED2        | 0.183202709  | 3.349241241  | 0.000906206 | 0.004559017 | no |
| FRMD8        | 0.183202058  | 3.34922893   | 0.000906245 | 0.004559017 | no |
| FRRS1L       | -0.183191357 | -3.34902651  | 0.000906885 | 0.004561168 | no |
| ANAPC2       | -0.183141889 | -3.348090767 | 0.000909849 | 0.004574807 | no |
| GLB1         | 0.183138991  | 3.348035939  | 0.000910023 | 0.004574807 | no |
| DKFZp434J022 | -0.183120975 | -3.347695152 | 0.000911105 | 0.004579174 | no |
| CLEC4F       | -0.183111903 | -3.347523547 | 0.00091165  | 0.004580843 | no |
| NEGR1        | -0.183100361 | -3.347305222 | 0.000912344 | 0.004583258 | no |
| CAPZA2       | 0.183077597  | 3.346874636  | 0.000913714 | 0.004589069 | no |
| FBRSL1       | -0.183025317 | -3.345885769 | 0.000916868 | 0.004603178 | no |
| ZNF691       | 0.183023937  | 3.345859676  | 0.000916951 | 0.004603178 | no |
| FLJ22184     | -0.182999706 | -3.345401349 | 0.000918417 | 0.004609457 | no |
| KLF3         | 0.182924455  | 3.343978066  | 0.000922982 | 0.004631285 | no |

|              |              |              |             |             |    |
|--------------|--------------|--------------|-------------|-------------|----|
| STXBP1       | -0.182882843 | -3.343191035 | 0.000925515 | 0.004642912 | no |
| SRCIN1       | -0.182843246 | -3.342442148 | 0.000927931 | 0.004653948 | no |
| DDAH1        | -0.182783905 | -3.34131988  | 0.000931563 | 0.004671075 | no |
| ADIPOR1      | 0.182768913  | 3.341036349  | 0.000932483 | 0.004674596 | no |
| PIK3R2       | -0.18275177  | -3.340712135 | 0.000933536 | 0.004678782 | no |
| LOC728606    | -0.182746911 | -3.340620255 | 0.000933834 | 0.004679187 | no |
| IFIT1        | 0.182710807  | 3.339937462  | 0.000936056 | 0.004689224 | no |
| HOXB7        | 0.182682016  | 3.339393     | 0.00093783  | 0.00469702  | no |
| PCDH15       | -0.182620637 | -3.338232288 | 0.000941625 | 0.004714924 | no |
| FXYP7        | -0.182594239 | -3.337733104 | 0.000943261 | 0.004722016 | no |
| SLC8A1       | 0.182511692  | 3.33617217   | 0.000948394 | 0.004746607 | no |
| ACVR1        | 0.182497542  | 3.335904608  | 0.000949276 | 0.004748822 | no |
| DGCR5        | -0.182497509 | -3.335903983 | 0.000949278 | 0.004748822 | no |
| KCTD4        | -0.182370689 | -3.333506044 | 0.000957222 | 0.004787444 | no |
| PPFIBP1      | 0.182354618  | 3.333202187  | 0.000958233 | 0.004791385 | no |
| HECTD2       | -0.182343951 | -3.333000493 | 0.000958904 | 0.004792001 | no |
| LINC00617    | -0.182340889 | -3.332942607 | 0.000959097 | 0.004792001 | no |
| LOC338651    | -0.182339381 | -3.332914086 | 0.000959192 | 0.004792001 | no |
| KCNA2        | -0.1823385   | -3.332897425 | 0.000959247 | 0.004792001 | no |
| PIK3C2B      | -0.182314404 | -3.332441846 | 0.000960767 | 0.004798474 | no |
| FAM46A       | 0.182303603  | 3.332237634  | 0.000961448 | 0.004800763 | no |
| KLRG1        | 0.182297578  | 3.332123727  | 0.000961829 | 0.004801547 | no |
| FAM86C1      | 0.18227862   | 3.331765289  | 0.000963027 | 0.004806411 | no |
| PCOLCE       | 0.182271514  | 3.33163093   | 0.000963476 | 0.004807537 | no |
| LINC00032    | -0.182262245 | -3.33145569  | 0.000964062 | 0.004808608 | no |
| LCORL        | -0.182261048 | -3.331433055 | 0.000964138 | 0.004808608 | no |
| ZFYVE21      | -0.182252947 | -3.331279908 | 0.000964651 | 0.00481005  | no |
| PPP1R9B      | -0.182237792 | -3.33099338  | 0.000965611 | 0.004813721 | no |
| DTX1         | -0.182216089 | -3.330583049 | 0.000966988 | 0.004819465 | no |
| RPA3         | 0.182187523  | 3.330042994  | 0.000968802 | 0.004827389 | no |
| MYH15        | -0.182181228 | -3.329923992 | 0.000969202 | 0.004827517 | no |
| C19orf24     | 0.182180054  | 3.329901781  | 0.000969277 | 0.004827517 | no |
| OLFML2A      | 0.182145975  | 3.329257515  | 0.000971447 | 0.004837203 | no |
| PLD1         | 0.182134773  | 3.32904573   | 0.000972161 | 0.004839638 | no |
| MED12L       | -0.182114522 | -3.328662893 | 0.000973454 | 0.004844949 | no |
| DNAJC13      | 0.182101802  | 3.328422429  | 0.000974266 | 0.004847871 | no |
| TMEM209      | 0.182051055  | 3.327463072  | 0.000977514 | 0.004862303 | no |
| ZNF638       | -0.182049243 | -3.327428822 | 0.00097763  | 0.004862303 | no |
| NLRP6        | 0.182045891  | 3.327365465  | 0.000977845 | 0.004862303 | no |
| TBC1D19      | 0.182039484  | 3.327244341  | 0.000978256 | 0.004863221 | no |
| KCNJ10       | -0.182016481 | -3.32680949  | 0.000979733 | 0.004869435 | no |
| C19orf10     | 0.181978121  | 3.326084358  | 0.0009822   | 0.004879686 | no |
| MLLT4-AS1    | -0.181977349 | -3.326069758 | 0.000982249 | 0.004879686 | no |
| VDAC3        | -0.181957917 | -3.325702433 | 0.000983501 | 0.004884493 | no |
| MSANTD3-TMEF | -0.181955277 | -3.325652523 | 0.000983672 | 0.004884493 | no |
| LCTL         | 0.181916528  | 3.324920057  | 0.000986173 | 0.004895724 | no |
| SPARCL1      | -0.181913183 | -3.32485683  | 0.000986389 | 0.004895724 | no |
| PLCD1        | 0.181906516  | 3.324730801  | 0.00098682  | 0.004896733 | no |
| RASL11A      | 0.181881678  | 3.3242613    | 0.000988427 | 0.004903577 | no |
| DET1         | -0.18187153  | -3.324069472 | 0.000989085 | 0.004905706 | no |
| PTCH1        | -0.181808415 | -3.322876492 | 0.000993183 | 0.004924893 | no |

|              |              |              |             |             |    |
|--------------|--------------|--------------|-------------|-------------|----|
| CCSAP        | -0.181790026 | -3.3225289   | 0.000994379 | 0.004929691 | no |
| LOC646268    | 0.18176427   | 3.322042086  | 0.000996058 | 0.004936873 | no |
| SPAG11B      | 0.181722243  | 3.321247735  | 0.000998803 | 0.004949335 | no |
| C4A          | 0.181718579  | 3.321178481  | 0.000999042 | 0.004949381 | no |
| SYT16        | -0.181640973 | -3.319711723 | 0.00100413  | 0.004973439 | no |
| COG1         | -0.181622363 | -3.319359987 | 0.001005353 | 0.004978352 | no |
| CACNG1       | -0.181615743 | -3.319234886 | 0.001005789 | 0.004979361 | no |
| LOC100130872 | 0.181589993  | 3.318748223  | 0.001007485 | 0.004986608 | no |
| LOC100499183 | 0.1815653    | 3.318281543  | 0.001009113 | 0.00499352  | no |
| DVL2         | -0.181512681 | -3.317287104 | 0.001012592 | 0.005009582 | no |
| WNK2         | -0.181505906 | -3.317159072 | 0.001013041 | 0.005010648 | no |
| CRYZL1       | -0.181494862 | -3.316950367 | 0.001013773 | 0.005013114 | no |
| LOC728218    | -0.18147403  | -3.316556669 | 0.001015155 | 0.005018793 | no |
| RND2         | -0.181466372 | -3.316411947 | 0.001015663 | 0.005020151 | no |
| SAMD10       | -0.181461666 | -3.316323015 | 0.001015976 | 0.005020542 | no |
| NDN          | -0.181431461 | -3.315752209 | 0.001017984 | 0.005029309 | no |
| SLC23A2      | -0.181423317 | -3.315598314 | 0.001018526 | 0.00503083  | no |
| ZBTB6        | -0.18141247  | -3.315393338 | 0.001019248 | 0.005033241 | no |
| FOXRED2      | -0.181361862 | -3.314436993 | 0.001022625 | 0.005048492 | no |
| RARS         | 0.181359148  | 3.314385697  | 0.001022806 | 0.005048492 | no |
| NTRK2        | -0.181350319 | -3.314218856 | 0.001023397 | 0.005049624 | no |
| GJB3         | 0.181348688  | 3.314188042  | 0.001023506 | 0.005049624 | no |
| CD63         | 0.181333615  | 3.313903209  | 0.001024514 | 0.005053439 | no |
| MAGED1       | -0.181327547 | -3.313788555 | 0.00102492  | 0.005054283 | no |
| KIAA1109     | -0.181321047 | -3.313665716 | 0.001025356 | 0.00505527  | no |
| SUCLG1       | -0.181303387 | -3.313332021 | 0.001026539 | 0.005059944 | no |
| PDS5B        | -0.181240313 | -3.312140186 | 0.001030777 | 0.005079668 | no |
| LOC100506388 | 0.181233232  | 3.312006386  | 0.001031254 | 0.005080852 | no |
| PCCB         | -0.181170385 | -3.310818881 | 0.001035494 | 0.005100574 | no |
| CACYBP       | -0.181162822 | -3.310675981 | 0.001036006 | 0.005101924 | no |
| DMRTC1       | 0.181155041  | 3.310528954  | 0.001036532 | 0.005103346 | no |
| FAM22A       | -0.181145324 | -3.310345353 | 0.00103719  | 0.005105401 | no |
| EEF1D        | -0.181141857 | -3.310279859 | 0.001037424 | 0.005105401 | no |
| ANAPC1P1     | 0.181074777  | 3.309012424  | 0.001041976 | 0.005126625 | no |
| PAR1         | -0.181021296 | -3.308001997 | 0.001045618 | 0.005143366 | no |
| ANKS1B       | -0.181005285 | -3.307699491 | 0.00104671  | 0.005147562 | no |
| LTBP3        | 0.18099876   | 3.307576208  | 0.001047156 | 0.005148576 | no |
| LRRCC1       | 0.180991549  | 3.307439977  | 0.001047648 | 0.005149819 | no |
| MAP3K10      | -0.180964471 | -3.306928401 | 0.0010495   | 0.005157742 | no |
| TMEM257      | -0.180952346 | -3.306699324 | 0.00105033  | 0.005160641 | no |
| FGFBP3       | -0.180945364 | -3.306567416 | 0.001050808 | 0.005161811 | no |
| LRRCC15      | 0.180925945  | 3.30620056   | 0.00105214  | 0.00516717  | no |
| H1FO         | -0.180910722 | -3.305912957 | 0.001053185 | 0.005171119 | no |
| ZSCAN18      | -0.180899765 | -3.305705963 | 0.001053937 | 0.005172641 | no |
| GPR179       | -0.180899201 | -3.305695297 | 0.001053976 | 0.005172641 | no |
| GLRB         | -0.180882925 | -3.30538782  | 0.001055095 | 0.00517695  | no |
| ZIM2         | -0.180875507 | -3.305247687 | 0.001055605 | 0.00517759  | no |
| ECSCR        | 0.18087061   | 3.305155168  | 0.001055942 | 0.00517759  | no |
| CACNG4       | -0.180870524 | -3.305153538 | 0.001055948 | 0.00517759  | no |
| CHKA         | -0.180843506 | -3.304643128 | 0.001057809 | 0.005185532 | no |
| BOP1         | -0.180821804 | -3.304233163 | 0.001059306 | 0.005191395 | no |

|              |              |              |             |             |    |
|--------------|--------------|--------------|-------------|-------------|----|
| CNNM1        | -0.180819168 | -3.304183351 | 0.001059488 | 0.005191395 | no |
| KHDC1L       | -0.180813231 | -3.304071195 | 0.001059898 | 0.005192222 | no |
| SLC43A3      | 0.180783071  | 3.303501451  | 0.001061983 | 0.005201247 | no |
| CLDN2        | 0.180742909  | 3.30274278   | 0.001064765 | 0.005213685 | no |
| FHL1         | -0.180706112 | -3.302047688 | 0.00106732  | 0.005225004 | no |
| ZNF483       | -0.180699077 | -3.301914788 | 0.001067809 | 0.005226208 | no |
| MRPS26       | -0.180677372 | -3.301504791 | 0.001069319 | 0.005232409 | no |
| DLEU7        | 0.180669715  | 3.301360152  | 0.001069852 | 0.005233826 | no |
| GABRB1       | -0.180658314 | -3.301144784 | 0.001070647 | 0.005236521 | no |
| PRKX         | -0.180617432 | -3.300372566 | 0.0010735   | 0.005249282 | no |
| KAT2A        | -0.180526358 | -3.298652317 | 0.001079882 | 0.005279286 | no |
| FGF14        | -0.180459778 | -3.297394781 | 0.001084569 | 0.005300995 | no |
| SEZ6         | -0.180429982 | -3.296832026 | 0.001086673 | 0.00531007  | no |
| SEC24C       | -0.180413131 | -3.296513764 | 0.001087864 | 0.005314684 | no |
| MMP15        | -0.180409029 | -3.296436286 | 0.001088155 | 0.005314893 | no |
| TPPP2        | -0.180368555 | -3.295671874 | 0.001091022 | 0.005327687 | no |
| CUL1         | 0.180356094  | 3.295436529  | 0.001091906 | 0.005330794 | no |
| NPAS3        | -0.180274768 | -3.293900631 | 0.001097693 | 0.005357828 | no |
| TUBA3FP      | -0.18025785  | -3.293581125 | 0.0010989   | 0.005362503 | no |
| PNMA2        | -0.180248455 | -3.293403715 | 0.001099571 | 0.005364559 | no |
| SFTA1P       | 0.180187717  | 3.292256678  | 0.001103918 | 0.005384545 | no |
| NETO1        | -0.180158842 | -3.29171141  | 0.00110599  | 0.005392246 | no |
| CPE          | -0.180158723 | -3.291709162 | 0.001105999 | 0.005392246 | no |
| SHCBP1       | 0.180130304  | 3.2911725    | 0.001108042 | 0.005400981 | no |
| ITIH2        | 0.180121178  | 3.291000153  | 0.001108699 | 0.005402452 | no |
| LOC100128573 | -0.180116838 | -3.290918215 | 0.001109011 | 0.005402452 | no |
| STAG2        | -0.180115634 | -3.290895463 | 0.001109098 | 0.005402452 | no |
| TNFSF12-TNFS | 0.180080547  | 3.29023291   | 0.001111627 | 0.0054134   | no |
| HARS2        | 0.180077468  | 3.290174763  | 0.001111849 | 0.0054134   | no |
| TOX3         | -0.180036696 | -3.289404868 | 0.001114795 | 0.005426516 | no |
| TNRC6B       | -0.180020446 | -3.289098027 | 0.001115972 | 0.005431011 | no |
| MTRNR2L4     | -0.180011645 | -3.288931838 | 0.001116609 | 0.005432884 | no |
| ZNF765       | 0.18000309   | 3.288770291  | 0.001117229 | 0.00543467  | no |
| SYTL4        | -0.179954367 | -3.287850298 | 0.001120767 | 0.005450086 | no |
| VCP          | 0.179952456  | 3.287814218  | 0.001120905 | 0.005450086 | no |
| VSTM2B       | -0.179929402 | -3.287378914 | 0.001122583 | 0.005457008 | no |
| ALG1L9P      | -0.179923754 | -3.287272275 | 0.001122994 | 0.005457773 | no |
| MGC39372     | 0.179919948  | 3.287200419  | 0.001123272 | 0.005457886 | no |
| NEMF         | -0.17990851  | -3.286984444 | 0.001124105 | 0.005460702 | no |
| GTF2E2       | 0.179880191  | 3.286449749  | 0.001126172 | 0.005469504 | no |
| SATB1        | -0.179874581 | -3.286343824 | 0.001126581 | 0.005470257 | no |
| KIAA0087     | -0.179860865 | -3.286084851 | 0.001127584 | 0.005473888 | no |
| TP53I13      | 0.179839055  | 3.285673063  | 0.001129179 | 0.005480396 | no |
| SNX27        | -0.179832282 | -3.28554517  | 0.001129675 | 0.005481566 | no |
| TRNAU1AP     | 0.179805174  | 3.285033365  | 0.001131662 | 0.005489967 | no |
| ASB3         | -0.179773569 | -3.284436655 | 0.001133983 | 0.005499984 | no |
| ARHGDI3      | -0.179766485 | -3.284302916 | 0.001134504 | 0.005501268 | no |
| TERF1        | -0.179742249 | -3.283845338 | 0.001136287 | 0.005508672 | no |
| CD163L1      | 0.179728876  | 3.28359287   | 0.001137272 | 0.005512204 | no |
| MTMR1        | -0.17971346  | -3.283301821 | 0.001138409 | 0.005516469 | no |
| SCRT2        | -0.179709937 | -3.283235297 | 0.001138668 | 0.005516484 | no |



|             |              |              |             |             |    |
|-------------|--------------|--------------|-------------|-------------|----|
| AMH         | -0.179623343 | -3.281600503 | 0.001145073 | 0.005546264 | no |
| DUSP27      | 0.179604388  | 3.281242668  | 0.00114648  | 0.005551825 | no |
| ZNRD1-AS1   | -0.179566064 | -3.280519174 | 0.001149328 | 0.005564365 | no |
| CGB8        | 0.179540437  | 3.280035405  | 0.001151237 | 0.005572348 | no |
| RPS25       | -0.17951299  | -3.279517277 | 0.001153284 | 0.005581    | no |
| MGMT        | 0.179448456  | 3.278299071  | 0.00115811  | 0.005603094 | no |
| THRB        | -0.179442472 | -3.278186117 | 0.001158559 | 0.005604003 | no |
| CCBL1       | -0.179437574 | -3.278093649 | 0.001158926 | 0.005604518 | no |
| KBTBD4      | -0.179423657 | -3.277830957 | 0.00115997  | 0.005608304 | no |
| ZNF525      | 0.179411123  | 3.277594354  | 0.001160911 | 0.005611591 | no |
| CSDA        | 0.179370244  | 3.276822729  | 0.001163984 | 0.005625183 | no |
| PRKCZ       | -0.179333233 | -3.276124112 | 0.001166774 | 0.005637396 | no |
| RGS7BP      | -0.179326178 | -3.275990954 | 0.001167306 | 0.0056387   | no |
| SGSM3       | -0.179310413 | -3.275693383 | 0.001168497 | 0.005643183 | no |
| TCEB2       | -0.1792524   | -3.274598399 | 0.001172887 | 0.005663113 | no |
| REPS2       | -0.179242913 | -3.274419334 | 0.001173607 | 0.005665314 | no |
| SEMA3F      | 0.179233216  | 3.274236314  | 0.001174342 | 0.005667593 | no |
| PRMT7       | -0.179203054 | -3.273667034 | 0.001176634 | 0.005677376 | no |
| TAS2R19     | -0.179151532 | -3.272694613 | 0.001180557 | 0.005695029 | no |
| FAM13A      | -0.179134993 | -3.272382472 | 0.001181819 | 0.005699837 | no |
| RAB3A       | -0.179084005 | -3.271420176 | 0.001185718 | 0.005717165 | no |
| NFYB        | -0.179081049 | -3.271364374 | 0.001185944 | 0.005717165 | no |
| GUCA1B      | -0.179069918 | -3.271154308 | 0.001186797 | 0.005719993 | no |
| MRC1        | 0.179058052  | 3.270930366  | 0.001187706 | 0.005722428 | no |
| GNAQ        | -0.179056381 | -3.270898823 | 0.001187835 | 0.005722428 | no |
| PHF16       | -0.179052813 | -3.270831492 | 0.001188108 | 0.005722464 | no |
| DENND5B-AS1 | -0.179033745 | -3.27047164  | 0.001189572 | 0.00572823  | no |
| SF3A2       | -0.179023945 | -3.270286688 | 0.001190325 | 0.005730571 | no |
| EID2B       | -0.179003999 | -3.269910273 | 0.001191858 | 0.00573667  | no |
| NKPD1       | -0.178913718 | -3.268206522 | 0.001198823 | 0.005768901 | no |
| ADAMTS6     | -0.178859096 | -3.267175773 | 0.001203055 | 0.00578797  | no |
| ZSCAN21     | -0.178830406 | -3.266634381 | 0.001205284 | 0.005797392 | no |
| PKP4        | -0.17877988  | -3.265680968 | 0.001209217 | 0.005815011 | no |
| ADAMTS19    | -0.178758214 | -3.26527213  | 0.001210907 | 0.005821837 | no |
| FAM171B     | -0.178738545 | -3.264901008 | 0.001212444 | 0.00582792  | no |
| LOC728558   | -0.178726123 | -3.2646666   | 0.001213415 | 0.005831285 | no |
| ZNF812      | 0.178708481  | 3.264333726  | 0.001214796 | 0.005836614 | no |
| ZNF512      | -0.178701666 | -3.264205138 | 0.001215329 | 0.005837873 | no |
| TNIP1       | 0.178601023  | 3.262306168  | 0.001223236 | 0.005874542 | no |
| RANBP9      | 0.178491102  | 3.26023227   | 0.001231926 | 0.005914953 | no |
| CNTNAP3     | 0.178448533  | 3.25942916   | 0.001235307 | 0.005929859 | no |
| H3F3B       | -0.178444074 | -3.259345034 | 0.001235661 | 0.005930237 | no |
| FAM163B     | -0.178437884 | -3.259228248 | 0.001236154 | 0.005931276 | no |
| LRRC37A2    | -0.178411647 | -3.25873326  | 0.001238243 | 0.005939974 | no |
| SNAI2       | 0.178396149  | 3.25844088   | 0.001239479 | 0.005944574 | no |
| ZNF8        | -0.178351035 | -3.257589784 | 0.001243082 | 0.005960524 | no |
| LOC441666   | -0.17834192  | -3.25741783  | 0.001243811 | 0.00596269  | no |
| TEX26       | 0.178310491  | 3.256824936  | 0.001246328 | 0.005972332 | no |
| LOC84989    | -0.178309869 | -3.256813204 | 0.001246378 | 0.005972332 | no |
| SH3GL3      | -0.178296614 | -3.256563146 | 0.001247441 | 0.005976093 | no |
| SKIV2L2     | -0.17828605  | -3.25636386  | 0.001248289 | 0.005978822 | no |

|              |              |              |             |             |    |
|--------------|--------------|--------------|-------------|-------------|----|
| RPS10        | -0.178279139 | -3.256233486 | 0.001248844 | 0.005980147 | no |
| TDRKH        | -0.178201266 | -3.254764494 | 0.001255112 | 0.006008576 | no |
| HIF3A        | -0.17819845  | -3.254711137 | 0.00125534  | 0.006008576 | no |
| ZNF346       | -0.178175064 | -3.254270237 | 0.001257228 | 0.006016275 | no |
| MMP2         | 0.17816234   | 3.25403022   | 0.001258257 | 0.006019857 | no |
| LINC00693    | -0.178155475 | -3.253900726 | 0.001258812 | 0.006021173 | no |
| SNRNP200     | -0.178105647 | -3.252960829 | 0.001262849 | 0.00603914  | no |
| FAM126A      | 0.178085427  | 3.252579427  | 0.001264491 | 0.006045645 | no |
| SNAP47       | -0.178078    | -3.252439334 | 0.001265094 | 0.006047185 | no |
| BRCC3        | 0.178020375  | 3.251352413  | 0.001269786 | 0.00606826  | no |
| FDX1         | 0.178012034  | 3.251195099  | 0.001270466 | 0.006070162 | no |
| SRXN1        | 0.178000826  | 3.250983686  | 0.001271381 | 0.006073183 | no |
| WDR77        | 0.177977074  | 3.250535702  | 0.001273322 | 0.006081101 | no |
| ALG14        | 0.177967816  | 3.250361085  | 0.001274079 | 0.006083365 | no |
| DNAJB7       | -0.177954159 | -3.250103501 | 0.001275196 | 0.006087349 | no |
| OTUD4        | 0.177893054  | 3.248951013  | 0.001280208 | 0.006109916 | no |
| MIR5093      | 0.17786307   | 3.248385514  | 0.001282674 | 0.006120325 | no |
| TUG1         | -0.17784385  | -3.248023027 | 0.001284257 | 0.006126518 | no |
| GGCX         | 0.177811112  | 3.247405589  | 0.001286957 | 0.006138037 | no |
| MARK4        | -0.177711184 | -3.245521044 | 0.001295232 | 0.006176133 | no |
| PURA         | -0.17767471  | -3.244833212 | 0.001298264 | 0.006189219 | no |
| RPUSD4       | -0.177641561 | -3.244208089 | 0.001301026 | 0.006201009 | no |
| AKTIP        | -0.177604989 | -3.243518435 | 0.001304079 | 0.006214183 | no |
| SMC5         | 0.177592158  | 3.243276475  | 0.001305152 | 0.006217916 | no |
| NAALADL2     | 0.177564549  | 3.242755849  | 0.001307463 | 0.006227545 | no |
| KREMEN1      | 0.177559237  | 3.242655676  | 0.001307908 | 0.006228285 | no |
| KHDRBS2      | -0.177545017 | -3.24238753  | 0.0013091   | 0.006232581 | no |
| PEX2         | -0.177520679 | -3.241928612 | 0.001311143 | 0.006239814 | no |
| USP2         | -0.177519082 | -3.241898491 | 0.001311277 | 0.006239814 | no |
| ALKBH3       | 0.177516538  | 3.241850524  | 0.00131149  | 0.006239814 | no |
| SOX12        | -0.177412651 | -3.239891631 | 0.001320245 | 0.006280075 | no |
| FBX041       | -0.177394181 | -3.239543374 | 0.001321807 | 0.006286113 | no |
| CERS3        | -0.177387814 | -3.239423326 | 0.001322345 | 0.006287284 | no |
| CYSTM1       | 0.177371318  | 3.239112289  | 0.001323742 | 0.006292522 | no |
| ZNF485       | -0.177367102 | -3.2390328   | 0.0013241   | 0.006292522 | no |
| DENND5A      | -0.177364439 | -3.238982583 | 0.001324325 | 0.006292522 | no |
| NTN1         | 0.177322429  | 3.238190516  | 0.001327891 | 0.006308068 | no |
| BFAR         | 0.177301151  | 3.237789334  | 0.0013297   | 0.006315266 | no |
| HIST1H3E     | 0.177297132  | 3.237713543  | 0.001330042 | 0.006315495 | no |
| SLAIN1       | -0.177239801 | -3.236632637 | 0.001334929 | 0.0063373   | no |
| FADS2        | -0.177235276 | -3.23654733  | 0.001335315 | 0.006337734 | no |
| HIST3H2A     | -0.177185407 | -3.235607133 | 0.001339581 | 0.006356576 | no |
| CHRM1        | -0.177174892 | -3.23540889  | 0.001340482 | 0.006359447 | no |
| LY75-CD302   | 0.177170702  | 3.235329902  | 0.001340841 | 0.006359747 | no |
| IL1A         | 0.17714127   | 3.23477503   | 0.001343366 | 0.00637032  | no |
| FAM188A      | -0.177135633 | -3.234668756 | 0.001343851 | 0.00637121  | no |
| LOC100499484 | 0.177118087  | 3.234337979  | 0.001345359 | 0.006376953 | no |
| ROB01        | -0.177093562 | -3.233875611 | 0.00134747  | 0.006384342 | no |
| RFPL1-AS1    | -0.177093072 | -3.233866388 | 0.001347512 | 0.006384342 | no |
| ZNF521       | -0.177082988 | -3.23367627  | 0.00134838  | 0.00638705  | no |
| TRAF3IP2     | 0.177066108  | 3.233358058  | 0.001349836 | 0.006392534 | no |

|           |              |              |             |             |    |
|-----------|--------------|--------------|-------------|-------------|----|
| LOC440297 | -0.177029181 | -3.232661935 | 0.001353025 | 0.006406224 | no |
| VANGL2    | -0.177005956 | -3.232224099 | 0.001355034 | 0.006414324 | no |
| MNF1      | -0.176984248 | -3.231814883 | 0.001356914 | 0.006421811 | no |
| LINC00704 | 0.176959631  | 3.231350828  | 0.001359049 | 0.0064305   | no |
| ADH4      | 0.176946211  | 3.231097854  | 0.001360215 | 0.006432499 | no |
| TAF13     | 0.17694112   | 3.231001884  | 0.001360657 | 0.006432499 | no |
| RAB18     | -0.176940435 | -3.230988989 | 0.001360717 | 0.006432499 | no |
| TCN1      | 0.176939928  | 3.230979421  | 0.001360761 | 0.006432499 | no |
| UNKL      | -0.176937538 | -3.230934373 | 0.001360968 | 0.006432499 | no |
| DDIT4L    | 0.176912786  | 3.230467791  | 0.001363121 | 0.006440197 | no |
| STAR      | -0.176911922 | -3.230451504 | 0.001363196 | 0.006440197 | no |
| GPN2      | 0.176875656  | 3.229767894  | 0.001366357 | 0.006453707 | no |
| IGBP1     | -0.17686254  | -3.229520659 | 0.001367501 | 0.006457694 | no |
| ABCA1     | 0.176759889  | 3.22758577   | 0.001376489 | 0.006498711 | no |
| TJP2      | -0.176735468 | -3.227125466 | 0.001378636 | 0.006507414 | no |
| DSTYK     | -0.176728614 | -3.226996279 | 0.001379239 | 0.006508831 | no |
| MARCKSL1  | -0.176666261 | -3.225821061 | 0.001384735 | 0.006533333 | no |
| RGR       | -0.176651205 | -3.225537292 | 0.001386065 | 0.006538173 | no |
| HPN       | 0.176646211  | 3.225443168  | 0.001386506 | 0.00653882  | no |
| ZNF624    | -0.176597181 | -3.224519073 | 0.001390847 | 0.006557854 | no |
| CWC27     | -0.17658775  | -3.224341345 | 0.001391684 | 0.006560358 | no |
| PACSLN2   | -0.176582824 | -3.224248504 | 0.001392121 | 0.006560979 | no |
| DNAJB5    | -0.176566469 | -3.22394026  | 0.001393573 | 0.006565607 | no |
| BEND5     | -0.176564882 | -3.22391035  | 0.001393714 | 0.006565607 | no |
| LOC148709 | -0.17654673  | -3.223568256 | 0.001395327 | 0.006571767 | no |
| MYCBP2    | -0.176470868 | -3.222138541 | 0.001402088 | 0.006602164 | no |
| ETS1      | 0.176419119  | 3.221163325  | 0.001406717 | 0.006622512 | no |
| SDR39U1   | -0.176406249 | -3.220920791 | 0.001407871 | 0.00662649  | no |
| WIPF2     | -0.176401281 | -3.220827171 | 0.001408316 | 0.006627136 | no |
| LOC729506 | -0.17638981  | -3.220610993 | 0.001409346 | 0.006630527 | no |
| ZFYVE16   | -0.176318355 | -3.219264457 | 0.001415772 | 0.006659303 | no |
| TMEM115   | 0.17630735   | 3.219057079  | 0.001416764 | 0.006662511 | no |
| PRDM16    | 0.176266186  | 3.218281393  | 0.001420481 | 0.006678221 | no |
| JUP       | 0.17626347   | 3.218230227  | 0.001420726 | 0.006678221 | no |
| ATP6VOA1  | -0.176245353 | -3.21788884  | 0.001422365 | 0.006684462 | no |
| TUBGCP6   | -0.176208568 | -3.217195685 | 0.001425698 | 0.00669866  | no |
| CEND1     | -0.17617371  | -3.216538865 | 0.001428863 | 0.006712063 | no |
| ABHD3     | 0.176134639  | 3.215802673  | 0.001432418 | 0.006727293 | no |
| CES1      | 0.17610738   | 3.215289065  | 0.001434903 | 0.006737491 | no |
| DNMBP-AS1 | -0.176087832 | -3.21492074  | 0.001436687 | 0.006744397 | no |
| MTRNR2L8  | -0.176073125 | -3.214643648 | 0.001438031 | 0.006749232 | no |
| PUS7L     | -0.176068008 | -3.214547236 | 0.001438499 | 0.006749953 | no |
| EEF1A2    | -0.176033498 | -3.213897016 | 0.001441658 | 0.006761715 | no |
| AQP3      | 0.176031893  | 3.213866769  | 0.001441805 | 0.006761715 | no |
| LOC96610  | 0.176028746  | 3.21380749   | 0.001442094 | 0.006761715 | no |
| DNM1L     | 0.176026887  | 3.213772459  | 0.001442264 | 0.006761715 | no |
| HTR2A     | -0.175999616 | -3.213258645 | 0.001444766 | 0.006771967 | no |
| LPIN1     | -0.175970383 | -3.21270788  | 0.001447452 | 0.006783078 | no |
| ZNF286B   | -0.175949176 | -3.212308333 | 0.001449404 | 0.006790743 | no |
| HNF1A     | -0.175924178 | -3.211837352 | 0.001451708 | 0.006800054 | no |
| PNISR     | -0.175914302 | -3.211651305 | 0.001452619 | 0.00680253  | no |

|          |              |              |             |             |    |
|----------|--------------|--------------|-------------|-------------|----|
| SYN3     | -0.175911587 | -3.211600138 | 0.001452869 | 0.00680253  | no |
| IGSF11   | -0.175901287 | -3.21140609  | 0.00145382  | 0.006805499 | no |
| P4HA3    | 0.175852345  | 3.210484058  | 0.001458346 | 0.006825198 | no |
| TIGD4    | 0.175843966  | 3.210326188  | 0.001459122 | 0.006827309 | no |
| MYADM    | 0.175840616  | 3.210263081  | 0.001459432 | 0.006827309 | no |
| TMEM8B   | -0.17582214  | -3.209915011 | 0.001461145 | 0.006833836 | no |
| KANK1    | -0.175717083 | -3.207935911 | 0.001470921 | 0.00687806  | no |
| EVL      | -0.175675161 | -3.207146191 | 0.001474839 | 0.00689488  | no |
| IL27RA   | 0.175630223  | 3.206299692  | 0.001479049 | 0.006912832 | no |
| CELSR2   | -0.17562731  | -3.206244819 | 0.001479322 | 0.006912832 | no |
| ZC3H4    | -0.175619492 | -3.20609754  | 0.001480056 | 0.006914757 | no |
| ZNF740   | -0.17560121  | -3.205753166 | 0.001481773 | 0.006921274 | no |
| GNAI3    | 0.175594423  | 3.205625333  | 0.001482411 | 0.006922749 | no |
| PKD1P1   | -0.175577145 | -3.205299872 | 0.001484036 | 0.006928832 | no |
| SUV39H2  | -0.175557995 | -3.204939145 | 0.001485839 | 0.00693504  | no |
| GTF3A    | 0.175556171  | 3.204904784  | 0.001486011 | 0.00693504  | no |
| POR      | 0.175530443  | 3.204420183  | 0.001488437 | 0.006944852 | no |
| ZNF687   | -0.175483414 | -3.203534348 | 0.00149288  | 0.006963268 | no |
| MRPS31P5 | -0.175481814 | -3.203504213 | 0.001493031 | 0.006963268 | no |
| BET1     | 0.175468252  | 3.203248766  | 0.001494315 | 0.006967744 | no |
| FTO      | -0.175457592 | -3.203047976 | 0.001495325 | 0.00697094  | no |
| TSPAN33  | 0.175439911  | 3.202714955  | 0.001497001 | 0.00697724  | no |
| BPTF     | -0.175428454 | -3.202499172 | 0.001498088 | 0.006980793 | no |
| STRA6    | 0.175394404  | 3.201857848  | 0.001501324 | 0.006994352 | no |
| NUBP1    | 0.175390359  | 3.201781647  | 0.001501708 | 0.006994628 | no |
| CA4      | -0.175361732 | -3.20124249  | 0.001504434 | 0.007005804 | no |
| DIRAS2   | -0.175310987 | -3.200286756 | 0.001509276 | 0.007026421 | no |
| TMEM180  | -0.175308488 | -3.200239692 | 0.001509515 | 0.007026421 | no |
| POGK     | -0.175290366 | -3.199898375 | 0.001511248 | 0.007032965 | no |
| COMMD9   | 0.175267939  | 3.199476011  | 0.001513395 | 0.007041433 | no |
| FAM105B  | 0.175246327  | 3.19906899   | 0.001515467 | 0.007048612 | no |
| CELF4    | -0.175245002 | -3.199044032 | 0.001515594 | 0.007048612 | no |
| ADCY5    | -0.175240377 | -3.198956918 | 0.001516038 | 0.007049151 | no |
| RNF121   | -0.175234644 | -3.198848949 | 0.001516588 | 0.007050184 | no |
| DDHD1    | 0.175231134  | 3.198782861  | 0.001516925 | 0.007050225 | no |
| HRH1     | 0.175209027  | 3.198366517  | 0.001519049 | 0.007058569 | no |
| FAM213A  | -0.175202412 | -3.198241943 | 0.001519685 | 0.007059998 | no |
| HIST2H3D | 0.175107638  | 3.196457133  | 0.001528825 | 0.007100923 | no |
| ARHGAP24 | 0.175094558  | 3.196210825  | 0.00153009  | 0.007104639 | no |
| IMPDH2   | -0.175092536 | -3.196172738 | 0.001530286 | 0.007104639 | no |
| PYROXD2  | 0.175070809  | 3.195763591  | 0.00153239  | 0.007112496 | no |
| ASCC2    | 0.175068229  | 3.195715001  | 0.00153264  | 0.007112496 | no |
| GPATCH2  | 0.175039172  | 3.195167834  | 0.001535459 | 0.007124037 | no |
| BIRC6    | -0.17502668  | -3.194932589 | 0.001536672 | 0.007128128 | no |
| C9orf114 | -0.175017194 | -3.19475396  | 0.001537594 | 0.007130865 | no |
| SNX33    | 0.175001951  | 3.194466933  | 0.001539076 | 0.0071362   | no |
| C14orf80 | -0.174912639 | -3.192785184 | 0.001547788 | 0.007175047 | no |
| JUN      | 0.174875156  | 3.192079383  | 0.001551458 | 0.007189518 | no |
| LEF1     | 0.174870651  | 3.191994567  | 0.0015519   | 0.007189518 | no |
| CACNB1   | -0.174870509 | -3.191991897 | 0.001551914 | 0.007189518 | no |
| EBF2     | 0.174861471  | 3.191821715  | 0.0015528   | 0.007192074 | no |

|              |              |              |             |             |    |
|--------------|--------------|--------------|-------------|-------------|----|
| BLK          | 0.174820341  | 3.191047281  | 0.001556839 | 0.007208348 | no |
| KIAA2022     | -0.174818866 | -3.191019498 | 0.001556984 | 0.007208348 | no |
| SYTL3        | 0.174785046  | 3.190382731  | 0.001560313 | 0.007222203 | no |
| SFTPA2       | -0.174775911 | -3.190210724 | 0.001561213 | 0.007224814 | no |
| PID1         | -0.174767013 | -3.190043189 | 0.001562091 | 0.007227318 | no |
| ZNF844       | -0.17476181  | -3.189945237 | 0.001562604 | 0.007228137 | no |
| ANKRD19P     | -0.174709503 | -3.188960401 | 0.001567772 | 0.007250483 | no |
| IGF2R        | 0.174677369  | 3.188355407  | 0.001570955 | 0.00726364  | no |
| LOC100129480 | -0.174667548 | -3.188170487 | 0.001571929 | 0.00726658  | no |
| SLU7         | -0.174611721 | -3.187119441 | 0.001577476 | 0.007290653 | no |
| CDK14        | -0.174560145 | -3.186148466 | 0.001582616 | 0.007312838 | no |
| RAB1B        | 0.174549666  | 3.185951176  | 0.001583663 | 0.007316099 | no |
| SOX11        | -0.174522104 | -3.185432306 | 0.001586418 | 0.007327251 | no |
| NPEPPS       | -0.174477208 | -3.184587115 | 0.001590915 | 0.007346443 | no |
| C3orf37      | -0.174461637 | -3.184293993 | 0.001592477 | 0.007352078 | no |
| SNORA69      | 0.174427549  | 3.183652285  | 0.001595902 | 0.007366309 | no |
| SEMA6C       | -0.174418006 | -3.183472638 | 0.001596862 | 0.007369158 | no |
| ATOX1        | 0.174398416  | 3.18310387   | 0.001598835 | 0.007376409 | no |
| PNCK         | -0.174395586 | -3.183050595 | 0.00159912  | 0.007376409 | no |
| LOC101055625 | 0.174379946  | 3.182756183  | 0.001600697 | 0.007382098 | no |
| UNK          | -0.174364095 | -3.182457803 | 0.001602296 | 0.007387889 | no |
| ZNF708       | -0.174323417 | -3.181692077 | 0.001606408 | 0.007405257 | no |
| CYP2D7P1     | -0.174319397 | -3.181616399 | 0.001606815 | 0.007405544 | no |
| KLC2         | -0.174314356 | -3.181521521 | 0.001607325 | 0.007406307 | no |
| ANKRD12      | -0.174305895 | -3.181362251 | 0.001608182 | 0.007408667 | no |
| HSPA12A      | -0.174275622 | -3.180792404 | 0.001611251 | 0.007421215 | no |
| HSPBAP1      | 0.17423614   | 3.180049238  | 0.001615262 | 0.007438094 | no |
| PTPRD        | -0.174208517 | -3.179529303 | 0.001618073 | 0.007449444 | no |
| GPR85        | -0.174163306 | -3.178678334 | 0.001622684 | 0.007467873 | no |
| EPX          | -0.174162459 | -3.17866239  | 0.001622771 | 0.007467873 | no |
| CYP46A1      | -0.174133007 | -3.178108043 | 0.001625781 | 0.007480126 | no |
| GFPT2        | 0.174080193  | 3.177114012  | 0.001631193 | 0.007503417 | no |
| MAP3K14-AS1  | 0.174067995  | 3.176884425  | 0.001632445 | 0.00750757  | no |
| LRRFIP1      | -0.174061222 | -3.176756957 | 0.001633141 | 0.007507729 | no |
| POM121L4P    | 0.174060856  | 3.176750059  | 0.001633178 | 0.007507729 | no |
| MYH14        | -0.173982338 | -3.175272307 | 0.001641263 | 0.007543281 | no |
| FHL2         | 0.173966992  | 3.174983482  | 0.001642847 | 0.007548949 | no |
| IPW          | -0.173943995 | -3.174550684 | 0.001645224 | 0.007558255 | no |
| KIF7         | -0.173924045 | -3.174175229 | 0.001647289 | 0.007566122 | no |
| RASGEF1C     | -0.173887953 | -3.173495997 | 0.00165103  | 0.007581684 | no |
| LURAP1L      | 0.173866397  | 3.173090329  | 0.001653268 | 0.00759034  | no |
| KHDRBS3      | -0.173853989 | -3.17285684  | 0.001654557 | 0.007593039 | no |
| FGF12        | -0.173853941 | -3.172855933 | 0.001654562 | 0.007593039 | no |
| ACTR3B       | -0.17383786  | -3.17255331  | 0.001656235 | 0.007599092 | no |
| PNMAL1       | -0.173790089 | -3.171654318 | 0.001661213 | 0.007619508 | no |
| PM20D1       | 0.173788356  | 3.171621711  | 0.001661394 | 0.007619508 | no |
| ACSS3        | 0.17376513   | 3.171184638  | 0.001663819 | 0.007629003 | no |
| SYT3         | -0.173760886 | -3.17110477  | 0.001664263 | 0.00762941  | no |
| AIP          | -0.173717605 | -3.170290332 | 0.001668792 | 0.007648542 | no |
| IKBKE        | 0.173714139  | 3.1702251    | 0.001669155 | 0.007648576 | no |
| RAB11B       | -0.173694823 | -3.169861626 | 0.001671181 | 0.007656225 | no |

|              |              |              |             |             |    |
|--------------|--------------|--------------|-------------|-------------|----|
| COA3         | -0.173640325 | -3.168836136 | 0.001676908 | 0.007680824 | no |
| SRFBP1       | 0.17361135   | 3.168290922  | 0.00167996  | 0.007693164 | no |
| FGF14-IT1    | -0.173592759 | -3.167941114 | 0.001681921 | 0.007700504 | no |
| MED8         | 0.173588462  | 3.167860262  | 0.001682375 | 0.007700939 | no |
| DACH2        | -0.173572926 | -3.167567922 | 0.001684015 | 0.007706809 | no |
| C7orf41      | -0.173543338 | -3.167011206 | 0.001687144 | 0.007719484 | no |
| AAGAB        | 0.173522433  | 3.166617859  | 0.001689358 | 0.007727968 | no |
| SH2B1        | -0.173491066 | -3.166027682 | 0.001692685 | 0.007741538 | no |
| COL18A1      | 0.173474503  | 3.165716035  | 0.001694444 | 0.007746502 | no |
| TCF4         | -0.17347406  | -3.165707697 | 0.001694491 | 0.007746502 | no |
| TP53TG5      | -0.173457193 | -3.16539035  | 0.001696284 | 0.00775305  | no |
| VWC2L        | -0.173452263 | -3.165297602 | 0.001696809 | 0.007753393 | no |
| ZNF676       | -0.173449705 | -3.165249469 | 0.001697081 | 0.007753393 | no |
| NPSR1        | 0.173420199  | 3.16469431   | 0.001700223 | 0.007766099 | no |
| RAB6A        | -0.17341575  | -3.164610612 | 0.001700697 | 0.007766614 | no |
| EEF1DP3      | -0.173395521 | -3.164230008 | 0.001702855 | 0.007774817 | no |
| PCDHA2       | -0.173379569 | -3.163929891 | 0.001704559 | 0.007780282 | no |
| ATRAID       | 0.173377534  | 3.163891601  | 0.001704776 | 0.007780282 | no |
| XP07         | -0.173361854 | -3.16359661  | 0.001706452 | 0.007786278 | no |
| SCARNA17     | -0.173348934 | -3.163353521 | 0.001707835 | 0.007790931 | no |
| PLA2R1       | 0.173329504  | 3.162987983  | 0.001709915 | 0.007797688 | no |
| CSF3R        | 0.173328326  | 3.162965805  | 0.001710042 | 0.007797688 | no |
| ZNF32-AS3    | -0.173294524 | -3.162329882 | 0.001713667 | 0.007812562 | no |
| GRHL1        | -0.173288097 | -3.16220896  | 0.001714357 | 0.007814051 | no |
| NAA30        | -0.173274178 | -3.161947113 | 0.001715853 | 0.007819209 | no |
| HEPACAM      | -0.173210698 | -3.160752875 | 0.001722688 | 0.007848695 | no |
| MTCP1        | 0.173135305  | 3.15933457   | 0.001730839 | 0.007884159 | no |
| EDNRB        | -0.173122812 | -3.159099562 | 0.001732193 | 0.007888654 | no |
| SLC25A36     | -0.173114025 | -3.158934261 | 0.001733146 | 0.007890027 | no |
| MSANTD1      | -0.173113263 | -3.158919935 | 0.001733229 | 0.007890027 | no |
| LOC100505715 | -0.173094681 | -3.158570388 | 0.001735245 | 0.007896876 | no |
| AREG         | 0.173092631  | 3.158531825  | 0.001735468 | 0.007896876 | no |
| PI4KAP2      | -0.173066175 | -3.158034143 | 0.001738344 | 0.007908286 | no |
| LIN7B        | -0.173057861 | -3.157877762 | 0.001739248 | 0.007910726 | no |
| IGLON5       | -0.172973545 | -3.156291735 | 0.001748446 | 0.007949709 | no |
| LOC645212    | -0.172972517 | -3.156272394 | 0.001748559 | 0.007949709 | no |
| PRKAG1       | -0.17281378  | -3.153286667 | 0.001765997 | 0.008027293 | no |
| AGFG1        | -0.172808401 | -3.153185503 | 0.001766591 | 0.008028293 | no |
| PTGFRN       | 0.172777118  | 3.152597127  | 0.001770047 | 0.008038691 | no |
| CISD3        | 0.172776577  | 3.152586943  | 0.001770107 | 0.008038691 | no |
| SPTB         | -0.172776466 | -3.15258487  | 0.001770119 | 0.008038691 | no |
| SUCLA2       | -0.172774154 | -3.152541381 | 0.001770375 | 0.008038691 | no |
| KCNH3        | -0.172670223 | -3.150586703 | 0.001781904 | 0.008089334 | no |
| PSMD13       | 0.172661141  | 3.150415886  | 0.001782915 | 0.008092214 | no |
| TRAPPC12     | -0.172619958 | -3.149641374 | 0.001787505 | 0.008111233 | no |
| RPAP2        | 0.172616776  | 3.149581526  | 0.00178786  | 0.008111233 | no |
| KIAA1967     | -0.172605724 | -3.14937368  | 0.001789094 | 0.008115117 | no |
| FLT3LG       | 0.172596332  | 3.149197048  | 0.001790143 | 0.008118163 | no |
| LOC100128239 | -0.172586374 | -3.149009789 | 0.001791256 | 0.008121496 | no |
| SPIN1        | -0.172577472 | -3.148842376 | 0.001792252 | 0.008124296 | no |
| MAFG         | 0.172543669  | 3.148206669  | 0.001796037 | 0.008139735 | no |

|              |              |              |             |             |    |
|--------------|--------------|--------------|-------------|-------------|----|
| LYPLA2       | 0.172524494  | 3.14784608   | 0.001798187 | 0.008146972 | no |
| ROR2         | 0.172522669  | 3.147811755  | 0.001798392 | 0.008146972 | no |
| PNMA6C       | -0.172511447 | -3.147600729 | 0.001799651 | 0.008150959 | no |
| MMRN2        | 0.172505261  | 3.147484388  | 0.001800346 | 0.008152388 | no |
| HMX1         | -0.172501663 | -3.147416726 | 0.00180075  | 0.0081525   | no |
| FNDC3B       | 0.172478381  | 3.146978902  | 0.001803367 | 0.00816263  | no |
| DHRSX        | 0.172436107  | 3.146183951  | 0.001808128 | 0.008182352 | no |
| ERBB4        | -0.172432937 | -3.146124333 | 0.001808486 | 0.008182352 | no |
| SELK         | -0.172412421 | -3.145738547 | 0.001810801 | 0.008191103 | no |
| MREG         | 0.17240523   | 3.145603319  | 0.001811613 | 0.008193052 | no |
| IL17RD       | -0.172401224 | -3.145527997 | 0.001812066 | 0.008193374 | no |
| SSC5D        | 0.172380456  | 3.14513746   | 0.001814414 | 0.008202265 | no |
| TSPY26P      | -0.172374917 | -3.145033307 | 0.001815041 | 0.008203372 | no |
| ACAT1        | -0.17236777  | -3.14489892  | 0.001815849 | 0.008205303 | no |
| LOC389895    | -0.17235936  | -3.14474078  | 0.001816802 | 0.00820788  | no |
| CCNG2        | -0.172308451 | -3.143783498 | 0.001822576 | 0.008232236 | no |
| SYNC         | 0.172246719  | 3.142622762  | 0.0018296   | 0.008262226 | no |
| GPC4         | 0.172232095  | 3.142347783  | 0.001831268 | 0.00826802  | no |
| CELSR1       | 0.172209899  | 3.141930448  | 0.001833802 | 0.008277721 | no |
| MPHOSPH8     | -0.172090797 | -3.13969111  | 0.001847452 | 0.008335676 | no |
| SH3BP2       | 0.172090317  | 3.13968209   | 0.001847508 | 0.008335676 | no |
| LOC100289473 | -0.172085055 | -3.139583168 | 0.001848113 | 0.008335676 | no |
| FKBP6        | 0.172084366  | 3.139570209  | 0.001848192 | 0.008335676 | no |
| DAGLB        | 0.172026979  | 3.138491278  | 0.001854805 | 0.008363209 | no |
| ZDHHC5       | 0.172024639  | 3.138447295  | 0.001855075 | 0.008363209 | no |
| KCP          | 0.171814266  | 3.134492386  | 0.001879506 | 0.008470783 | no |
| KLHDC4       | -0.171812394 | -3.134457197 | 0.001879725 | 0.008470783 | no |
| IL9          | -0.171806944 | -3.134354743 | 0.001880362 | 0.008471876 | no |
| AMPD2        | 0.171769483  | 3.133650539  | 0.001884745 | 0.008489844 | no |
| DNAAF2       | -0.171757621 | -3.133427571 | 0.001886134 | 0.008494323 | no |
| CEBPE        | 0.171725507  | 3.132823895  | 0.001889902 | 0.008509507 | no |
| THBS2        | 0.17171201   | 3.132570191  | 0.001891487 | 0.008514861 | no |
| TSSC1        | -0.17170044  | -3.132352696 | 0.001892847 | 0.008519199 | no |
| C17orf62     | 0.171676023  | 3.131893726  | 0.00189572  | 0.008530343 | no |
| LINC00667    | -0.171670106 | -3.131782507 | 0.001896417 | 0.008531692 | no |
| SCAI         | -0.171664927 | -3.131685165 | 0.001897027 | 0.008532651 | no |
| SFTPC        | -0.171642115 | -3.131256361 | 0.001899717 | 0.00854296  | no |
| WDR81        | 0.171629463  | 3.131018555  | 0.00190121  | 0.008547886 | no |
| REPIN1       | -0.171579756 | -3.130084249 | 0.001907086 | 0.008572514 | no |
| GPC2         | -0.1715714   | -3.129927176 | 0.001908076 | 0.008575169 | no |
| ZNF202       | -0.171548943 | -3.129505082 | 0.001910738 | 0.008585336 | no |
| HNRNPA1L2    | -0.171493485 | -3.128462727 | 0.001917325 | 0.008613135 | no |
| ATP13A3      | 0.171485997  | 3.12832199   | 0.001918216 | 0.008615337 | no |
| WHSC2        | -0.171450601 | -3.127656709 | 0.001922434 | 0.008632474 | no |
| BRAP         | -0.17144625  | -3.127574947 | 0.001922952 | 0.008633    | no |
| FSTL5        | -0.171417384 | -3.127032411 | 0.001926399 | 0.008646666 | no |
| MSRA         | -0.171412653 | -3.126943494 | 0.001926964 | 0.008647398 | no |
| LOC399744    | -0.171404108 | -3.126782901 | 0.001927986 | 0.008650176 | no |
| PLAT         | 0.171382438  | 3.126375635  | 0.001930579 | 0.008660001 | no |
| RPH3A        | -0.171321152 | -3.125223828 | 0.001937929 | 0.008691158 | no |
| SCARNA9L     | -0.171315357 | -3.125114924 | 0.001938625 | 0.008692449 | no |

|          |              |              |             |             |    |
|----------|--------------|--------------|-------------|-------------|----|
| SLC24A5  | -0.171312025 | -3.125052312 | 0.001939026 | 0.008692449 | no |
| DAAM2    | -0.171270858 | -3.124278639 | 0.00194398  | 0.008712841 | no |
| EDNRA    | 0.171262962  | 3.124130256  | 0.001944931 | 0.008715288 | no |
| ENDOD1   | 0.171228811  | 3.123488462  | 0.001949052 | 0.008731932 | no |
| SLC25A30 | 0.171215917  | 3.123246143  | 0.00195061  | 0.00873709  | no |
| BRD8     | -0.171202191 | -3.122988208 | 0.001952269 | 0.008742701 | no |
| CHD5     | -0.171179802 | -3.122567462 | 0.001954979 | 0.008753012 | no |
| SH2B2    | -0.171176313 | -3.122501903 | 0.001955402 | 0.00875308  | no |
| ZNF385C  | -0.171172464 | -3.12242957  | 0.001955868 | 0.008753344 | no |
| DVL1     | -0.17115237  | -3.122051971 | 0.001958304 | 0.008762421 | no |
| SLC5A12  | -0.171147096 | -3.121952852 | 0.001958944 | 0.00876346  | no |
| STATH    | 0.171125352  | 3.121544257  | 0.001961584 | 0.008773443 | no |
| IER5L    | 0.171095789  | 3.120988725  | 0.001965178 | 0.00878769  | no |
| SMC3     | -0.171076339 | -3.120623225 | 0.001967546 | 0.008795186 | no |
| AP3M2    | -0.171075299 | -3.120603698 | 0.001967673 | 0.008795186 | no |
| FAM83G   | 0.171057211  | 3.120263803  | 0.001969877 | 0.00880321  | no |
| S100A16  | 0.171016087  | 3.119491044  | 0.001974898 | 0.008823813 | no |
| KLHDC8B  | 0.171005162  | 3.119285762  | 0.001976234 | 0.008827664 | no |
| NDUFB10  | -0.17100232  | -3.119232361 | 0.001976582 | 0.008827664 | no |
| CAMKV    | -0.170998132 | -3.119153675 | 0.001977094 | 0.008828118 | no |
| GNG12    | 0.170977186  | 3.118760087  | 0.001979659 | 0.008837732 | no |
| PGPEP1   | 0.170972272  | 3.118667748  | 0.001980261 | 0.008838584 | no |
| KCNQ2    | -0.170967091 | -3.118570409 | 0.001980896 | 0.008839582 | no |
| CALM3    | -0.170927087 | -3.117818741 | 0.001985805 | 0.008859649 | no |
| PNMAL2   | -0.170912243 | -3.117539825 | 0.001987629 | 0.008865947 | no |
| LRRC39   | 0.170902718  | 3.117360866  | 0.0019888   | 0.008869332 | no |
| ANGPTL6  | 0.170831565  | 3.116023971  | 0.001997571 | 0.008906598 | no |
| ACOX2    | 0.170823273  | 3.115868174  | 0.001998596 | 0.008909318 | no |
| KCNK15   | 0.170802806  | 3.11548362   | 0.002001126 | 0.008918749 | no |
| PARK7    | -0.170790148 | -3.115245799 | 0.002002693 | 0.008923881 | no |
| RAB36    | 0.170754468  | 3.11457544   | 0.002007115 | 0.00894173  | no |
| TAS2R31  | -0.170749077 | -3.114474153 | 0.002007784 | 0.008942856 | no |
| HIST1H4F | 0.170744759  | 3.114393034  | 0.00200832  | 0.008943389 | no |
| BAG3     | 0.170735814  | 3.114224983  | 0.00200943  | 0.008946481 | no |
| MED13    | -0.170724765 | -3.1140174   | 0.002010803 | 0.008950737 | no |
| MNAT1    | -0.170711624 | -3.113770504 | 0.002012436 | 0.008955415 | no |
| ZC2HC1B  | -0.170709608 | -3.113732636 | 0.002012687 | 0.008955415 | no |
| KCTD1    | -0.170683325 | -3.113238839 | 0.002015958 | 0.008968114 | no |
| ZNF793   | -0.170676838 | -3.113116982 | 0.002016766 | 0.008969852 | no |
| GNB5     | -0.170634101 | -3.112314081 | 0.002022098 | 0.008990233 | no |
| ATP6V1H  | -0.1706334   | -3.112300903 | 0.002022185 | 0.008990233 | no |
| PHF7     | -0.170628509 | -3.112209013 | 0.002022796 | 0.008991089 | no |
| PRUNE    | 0.170605619  | 3.11177899   | 0.002025658 | 0.009001947 | no |
| PPP2CB   | -0.170599549 | -3.111664972 | 0.002026417 | 0.00900346  | no |
| NAGPA    | 0.170571835  | 3.111144329  | 0.002029888 | 0.009017018 | no |
| ANKRD28  | -0.170561411 | -3.110948503 | 0.002031195 | 0.009020959 | no |
| KIAA1107 | -0.170552475 | -3.110780622 | 0.002032316 | 0.009024073 | no |
| INSL3    | 0.170500096  | 3.109796647  | 0.002038899 | 0.009051429 | no |
| PPP1R3B  | 0.170470177  | 3.109234614  | 0.002042667 | 0.009066286 | no |
| RPL3     | -0.170375955 | -3.107464704 | 0.002054576 | 0.009117261 | no |
| LTB4R    | 0.17036703   | 3.107297056  | 0.002055707 | 0.009120398 | no |



|              |              |              |             |             |    |
|--------------|--------------|--------------|-------------|-------------|----|
| BZRAP1       | -0.170292547 | -3.105897993 | 0.002065171 | 0.009160495 | no |
| C5orf45      | -0.170264675 | -3.105374469 | 0.002068723 | 0.009174355 | no |
| PCDH10       | -0.170260128 | -3.105289059 | 0.002069303 | 0.009175034 | no |
| HTR2B        | 0.170251764  | 3.10513195   | 0.00207037  | 0.009177873 | no |
| GDF10        | -0.170244026 | -3.104986609 | 0.002071358 | 0.009180358 | no |
| CLSTN2       | -0.170232374 | -3.104767758 | 0.002072846 | 0.009185059 | no |
| CDK19        | -0.170211286 | -3.104371673 | 0.002075542 | 0.009195108 | no |
| NAPG         | -0.170202482 | -3.104206308 | 0.002076668 | 0.009198202 | no |
| TM7SF3       | 0.170142176  | 3.103073626  | 0.002084399 | 0.009228754 | no |
| TSPYL1       | -0.170141977 | -3.10306989  | 0.002084425 | 0.009228754 | no |
| TUBE1        | -0.170131356 | -3.102870407 | 0.002085789 | 0.009232892 | no |
| NSFL1C       | -0.17011029  | -3.10247476  | 0.002088497 | 0.009242977 | no |
| C6orf164     | -0.170085311 | -3.102005625 | 0.002091713 | 0.009255301 | no |
| MEIS2        | -0.170055877 | -3.101452817 | 0.002095508 | 0.009270184 | no |
| MORC4        | 0.169999926  | 3.100402015  | 0.002102739 | 0.009300259 | no |
| RBM7         | 0.169987405  | 3.100166863  | 0.00210436  | 0.009305514 | no |
| TRIM69       | 0.169973563  | 3.099906919  | 0.002106154 | 0.009310467 | no |
| LINC00320    | -0.169972076 | -3.099878988 | 0.002106346 | 0.009310467 | no |
| SYN1         | -0.169914825 | -3.098803818 | 0.002113781 | 0.009341074 | no |
| TIMM21       | -0.169911028 | -3.098732521 | 0.002114274 | 0.009341074 | no |
| LUST         | -0.169908721 | -3.098689183 | 0.002114575 | 0.009341074 | no |
| CYB5D1       | 0.169852995  | 3.097642701  | 0.002121836 | 0.009371225 | no |
| TASP1        | 0.169816655  | 3.096960281  | 0.002126584 | 0.009388152 | no |
| SNAPC4       | -0.169815751 | -3.096943292 | 0.002126702 | 0.009388152 | no |
| RAB11FIP3    | -0.169813633 | -3.096903521 | 0.002126979 | 0.009388152 | no |
| ANGEL2       | -0.169798307 | -3.096615728 | 0.002128985 | 0.009395074 | no |
| AURKAPS1     | 0.169778217  | 3.096238462  | 0.002131616 | 0.009404756 | no |
| MT2A         | 0.169773014  | 3.096140776  | 0.002132298 | 0.009405834 | no |
| RABL3        | 0.169678346  | 3.094363115  | 0.002144742 | 0.009458785 | no |
| SARDH        | 0.169674219  | 3.094285626  | 0.002145286 | 0.009459243 | no |
| SPEN         | -0.169659088 | -3.094001504 | 0.002147282 | 0.0094661   | no |
| FKBP8        | -0.169654695 | -3.093919027 | 0.002147862 | 0.009466713 | no |
| PTGES        | 0.16965122   | 3.093853774  | 0.00214832  | 0.009466793 | no |
| ZER1         | -0.169621199 | -3.093290065 | 0.002152286 | 0.009482326 | no |
| OLFM1        | -0.169546246 | -3.091882739 | 0.002162218 | 0.009524127 | no |
| RGS22        | 0.169520506  | 3.091399438  | 0.002165638 | 0.009537238 | no |
| CHRNA4       | -0.169500891 | -3.091031158 | 0.002168247 | 0.009545274 | no |
| PLXNC1       | 0.169500115  | 3.091016578  | 0.002168351 | 0.009545274 | no |
| FRAT1        | -0.169487821 | -3.090785758 | 0.002169988 | 0.009550525 | no |
| NXPH3        | -0.16947353  | -3.090517443 | 0.002171892 | 0.009556949 | no |
| KIAA1875     | -0.16943702  | -3.089831958 | 0.002176765 | 0.009576429 | no |
| KLF11        | 0.169406078  | 3.089251046  | 0.002180902 | 0.009592666 | no |
| TM2D1        | 0.169367602  | 3.088528683  | 0.002186057 | 0.009613371 | no |
| GGA3         | -0.169349057 | -3.088180513 | 0.002188545 | 0.009622346 | no |
| EEA1         | 0.16929207   | 3.08711065   | 0.002196208 | 0.009654062 | no |
| PROX1        | -0.169263322 | -3.086570954 | 0.002200083 | 0.009669118 | no |
| SNRPD1       | -0.169239107 | -3.086116371 | 0.002203352 | 0.009681504 | no |
| MAD1L1       | -0.169217597 | -3.085712562 | 0.002206259 | 0.009690085 | no |
| GABRG1       | -0.169215035 | -3.08566447  | 0.002206606 | 0.009690085 | no |
| LOC100128252 | -0.169214653 | -3.085657287 | 0.002206657 | 0.009690085 | no |
| ISCA1        | -0.16917062  | -3.084830681 | 0.002212621 | 0.009714287 | no |

|              |              |              |             |             |    |
|--------------|--------------|--------------|-------------|-------------|----|
| TGFB3        | 0.169155191  | 3.084541044  | 0.002214714 | 0.009721491 | no |
| MESTIT1      | -0.169097849 | -3.083464639 | 0.002222509 | 0.009752745 | no |
| ADO          | -0.169096136 | -3.083432487 | 0.002222742 | 0.009752745 | no |
| DYNLL2       | -0.169066555 | -3.082877209 | 0.002226773 | 0.009768439 | no |
| MARK2P9      | 0.169054057  | 3.082642611  | 0.002228478 | 0.009773924 | no |
| SAFB         | -0.169033775 | -3.082261881 | 0.002231248 | 0.009783948 | no |
| LANCL1       | -0.169030655 | -3.082203332 | 0.002231674 | 0.009783948 | no |
| SDCBP        | 0.169002302  | 3.081671117  | 0.002235552 | 0.009798951 | no |
| WBP2         | -0.168941378 | -3.080527545 | 0.002243906 | 0.009833561 | no |
| CTSO         | 0.168936517  | 3.080436305  | 0.002244574 | 0.009834482 | no |
| TSHZ1        | -0.168925735 | -3.08023394  | 0.002246055 | 0.009838968 | no |
| MTCH1        | -0.168907418 | -3.079890125 | 0.002248575 | 0.009847997 | no |
| PLEKHF1      | 0.168797094  | 3.077819444  | 0.002263803 | 0.009911459 | no |
| MBTD1        | -0.168795763 | -3.077794455 | 0.002263987 | 0.009911459 | no |
| KRCC1        | 0.168757641  | 3.077078965  | 0.002269272 | 0.009932569 | no |
| DPRXP4       | 0.168751395  | 3.076961743  | 0.002270138 | 0.00993273  | no |
| CD5L         | 0.168750716  | 3.076948996  | 0.002270233 | 0.00993273  | no |
| MASP1        | -0.168732383 | -3.076604923 | 0.002272779 | 0.009940626 | no |
| GPR19        | -0.168730184 | -3.076563657 | 0.002273084 | 0.009940626 | no |
| MYH7         | -0.168727733 | -3.076517665 | 0.002273425 | 0.009940626 | no |
| DUS2L        | -0.168719601 | -3.076365035 | 0.002274556 | 0.009943547 | no |
| CLDN9        | -0.168652976 | -3.07511465  | 0.002283838 | 0.009982093 | no |
| POLR3A       | -0.168624692 | -3.074583836 | 0.002287788 | 0.009997328 | no |
| NIN          | -0.168618384 | -3.074465457 | 0.00228867  | 0.009999149 | no |
| MT1M         | 0.168588006  | 3.073895374  | 0.002292922 | 0.010015689 | no |
| VWA8-AS1     | -0.168543836 | -3.073066448 | 0.002299117 | 0.010040709 | no |
| ADSS         | 0.168535758  | 3.072914866  | 0.002300252 | 0.010043622 | no |
| TSN          | -0.16846845  | -3.071651783 | 0.002309725 | 0.010082939 | no |
| KCTD16       | -0.168464748 | -3.071582311 | 0.002310248 | 0.01008317  | no |
| GATSL3       | -0.168453255 | -3.071366637 | 0.002311869 | 0.010088199 | no |
| PKD1         | -0.168428636 | -3.070904661 | 0.002315346 | 0.01010132  | no |
| STK17A       | 0.168420031  | 3.070743194  | 0.002316563 | 0.010104576 | no |
| KAT6A        | -0.168383216 | -3.070052363 | 0.002321773 | 0.01012525  | no |
| SHMT1        | 0.16831543   | 3.068780413  | 0.002331396 | 0.010165151 | no |
| TMEM72-AS1   | -0.168306204 | -3.068607304 | 0.002332708 | 0.01016881  | no |
| HMSD         | 0.168300866  | 3.068507129  | 0.002333468 | 0.010170059 | no |
| BTBD11       | 0.168279435  | 3.068105013  | 0.00233652  | 0.010181297 | no |
| HDAC5        | -0.168247854 | -3.06751244  | 0.002341025 | 0.010198857 | no |
| ATP6AP1      | 0.168234335  | 3.067258789  | 0.002342955 | 0.010205199 | no |
| HELQ         | 0.168216868  | 3.066931052  | 0.002345452 | 0.010212405 | no |
| LOC100506083 | -0.168216112 | -3.066916875 | 0.00234556  | 0.010212405 | no |
| SLC9A2       | -0.168205733 | -3.066722133 | 0.002347045 | 0.0102168   | no |
| AHCYL1       | -0.168183855 | -3.066311644 | 0.002350177 | 0.010228364 | no |
| BAIAP2-AS1   | -0.168178681 | -3.066214563 | 0.002350919 | 0.010229519 | no |
| ECE1         | 0.168175129  | 3.066147921  | 0.002351428 | 0.010229662 | no |
| TIMP1        | 0.168171293  | 3.066075951  | 0.002351978 | 0.010229984 | no |
| SPCS3        | 0.168156098  | 3.065790848  | 0.002354157 | 0.010237391 | no |
| MMS19        | -0.168145795 | -3.065597546 | 0.002355636 | 0.010241749 | no |
| NEDD1        | 0.168137557  | 3.065442986  | 0.002356819 | 0.01024482  | no |
| RPL23AP7     | 0.168131946  | 3.065337705  | 0.002357625 | 0.010245067 | no |
| PLXDC1       | 0.168130512  | 3.065310794  | 0.002357831 | 0.010245067 | no |

|              |              |              |             |             |    |
|--------------|--------------|--------------|-------------|-------------|----|
| ZFP41        | -0.168127208 | -3.065248804 | 0.002358306 | 0.010245067 | no |
| MAPK1        | -0.168065575 | -3.064092467 | 0.002367178 | 0.010281535 | no |
| SLC25A27     | -0.168039244 | -3.063598461 | 0.002370978 | 0.010295958 | no |
| TMX2-CTNND1  | -0.167994073 | -3.062751014 | 0.00237751  | 0.010319137 | no |
| MYO6         | -0.167992097 | -3.062713926 | 0.002377796 | 0.010319137 | no |
| NPDC1        | -0.167991148 | -3.062696135 | 0.002377934 | 0.010319137 | no |
| CSF1         | 0.167989056  | 3.062656881  | 0.002378237 | 0.010319137 | no |
| DLG2         | -0.167984861 | -3.062578192 | 0.002378844 | 0.01031969  | no |
| LOC100130357 | -0.167952478 | -3.061970658 | 0.00238354  | 0.010336896 | no |
| GALNT3       | 0.167950872  | 3.061940535  | 0.002383773 | 0.010336896 | no |
| TSPAN10      | 0.167924097  | 3.061438224  | 0.002387661 | 0.01035167  | no |
| ZNF726       | -0.167914542 | -3.061258977 | 0.00238905  | 0.010355502 | no |
| CEP170       | -0.167911352 | -3.061199123 | 0.002389514 | 0.010355502 | no |
| FLJ16779     | -0.167908078 | -3.061137711 | 0.002389991 | 0.010355502 | no |
| SPRY2        | 0.16790094   | 3.061003805  | 0.002391029 | 0.010357914 | no |
| GPSM2        | -0.167891952 | -3.060835192 | 0.002392338 | 0.010360113 | no |
| CBLN3        | 0.16789083   | 3.060814139  | 0.002392501 | 0.010360113 | no |
| ADAM9        | 0.167835755  | 3.059780953  | 0.002400533 | 0.010392573 | no |
| ADAM8        | 0.167832802  | 3.059725569  | 0.002400964 | 0.010392573 | no |
| TMEM245      | -0.167829176 | -3.059657543 | 0.002401494 | 0.010392773 | no |
| LOC283070    | -0.167817861 | -3.059445293 | 0.002403148 | 0.010397836 | no |
| PAIP2B       | -0.167752396 | -3.058217245 | 0.002412737 | 0.010437223 | no |
| CLTB         | -0.167734831 | -3.057887752 | 0.002415315 | 0.010446275 | no |
| MPDZ         | -0.167688833 | -3.057024919 | 0.00242208  | 0.010473425 | no |
| LOC100506730 | -0.167657398 | -3.056435281 | 0.002426713 | 0.010491348 | no |
| STXBP6       | -0.167627876 | -3.05588152  | 0.002431071 | 0.010506122 | no |
| TIMM23       | -0.167622107 | -3.055773315 | 0.002431924 | 0.010506122 | no |
| NMT1         | 0.167622005  | 3.055771402  | 0.002431939 | 0.010506122 | no |
| TAF6         | -0.167621012 | -3.055752776 | 0.002432086 | 0.010506122 | no |
| FHAD1        | 0.167605386  | 3.055459674  | 0.002434396 | 0.01051399  | no |
| SFXN2        | 0.167596937  | 3.055301201  | 0.002435647 | 0.010517276 | no |
| NICN1        | -0.167576897 | -3.054925316 | 0.002438614 | 0.010527975 | no |
| TMEM123      | 0.167551189  | 3.054443112  | 0.002442426 | 0.010542314 | no |
| TRAPPC2      | -0.16745035  | -3.052551782 | 0.002457431 | 0.010604948 | no |
| NARFL        | -0.167443157 | -3.052416875 | 0.002458504 | 0.01060745  | no |
| EFHA2        | -0.167437072 | -3.052302754 | 0.002459412 | 0.01060924  | no |
| DPF1         | -0.167395462 | -3.051522348 | 0.002465633 | 0.010633938 | no |
| FAM5C        | -0.167370074 | -3.051046201 | 0.002469435 | 0.010646193 | no |
| FKBP3        | -0.167369875 | -3.051042457 | 0.002469465 | 0.010646193 | no |
| KCNH1        | -0.167357418 | -3.050808833 | 0.002471333 | 0.010651046 | no |
| SLC4A7       | 0.167355757  | 3.050777683  | 0.002471582 | 0.010651046 | no |
| MTF1         | 0.167339373  | 3.050470409  | 0.00247404  | 0.010659503 | no |
| ZBTB8A       | -0.167321549 | -3.050136137 | 0.002476718 | 0.010668899 | no |
| SIPA1L2      | 0.167309838  | 3.04991651   | 0.002478478 | 0.010674343 | no |
| LGALS1       | 0.167291447  | 3.049571601  | 0.002481245 | 0.010684118 | no |
| SGCG         | -0.16728532  | -3.049456685 | 0.002482167 | 0.01068589  | no |
| METTL16      | -0.16728211  | -3.0493965   | 0.002482651 | 0.01068589  | no |
| CNDP2        | 0.167275478  | 3.049272116  | 0.00248365  | 0.010688049 | no |
| PCDH11X      | -0.167250323 | -3.048800376 | 0.002487442 | 0.010702226 | no |
| RBFOX3       | -0.167245468 | -3.048709327 | 0.002488175 | 0.010703235 | no |
| SAT2         | -0.167228728 | -3.048395383 | 0.002490702 | 0.010710121 | no |

|              |              |              |             |             |    |
|--------------|--------------|--------------|-------------|-------------|----|
| ZNF252P-AS1  | -0.167228265 | -3.048386703 | 0.002490772 | 0.010710121 | no |
| AJAP1        | -0.167224205 | -3.048310566 | 0.002491386 | 0.010710615 | no |
| ZNF250       | -0.167217805 | -3.048190538 | 0.002492353 | 0.01071263  | no |
| ARMCX5-GPRAS | -0.167170425 | -3.047302032 | 0.002499523 | 0.010741302 | no |
| UBE2Q2P3     | -0.167164333 | -3.047187794 | 0.002500446 | 0.010743121 | no |
| NAV2         | -0.167125889 | -3.046466873 | 0.00250628  | 0.010766034 | no |
| ZBTB42       | 0.167116195  | 3.046285082  | 0.002507753 | 0.010770208 | no |
| EIF2D        | 0.167108812  | 3.046146627  | 0.002508876 | 0.010772876 | no |
| ZNF821       | -0.167043914 | -3.044929679 | 0.002518761 | 0.010813163 | no |
| MFNG         | 0.166995204  | 3.044016288  | 0.002526204 | 0.010842951 | no |
| MFHAS1       | 0.166982002  | 3.043768741  | 0.002528225 | 0.010849457 | no |
| TACSTD2      | 0.166970151  | 3.043546534  | 0.00253004  | 0.010855079 | no |
| TEX29        | -0.166911625 | -3.042449133 | 0.002539022 | 0.010891364 | no |
| GALNTL6      | -0.16690635  | -3.042350236 | 0.002539833 | 0.010891364 | no |
| PPP2R5B      | -0.166905149 | -3.042327712 | 0.002540018 | 0.010891364 | no |
| ZFP3         | -0.166895138 | -3.042140002 | 0.002541557 | 0.010895793 | no |
| DEGS2        | -0.166852935 | -3.041348699 | 0.002548058 | 0.010921483 | no |
| FAM181A-AS1  | 0.166845668  | 3.04121244   | 0.002549179 | 0.010924109 | no |
| C8orf4       | 0.166835018  | 3.041012758  | 0.002550823 | 0.010928973 | no |
| SCN2A        | -0.166821934 | -3.040767441 | 0.002552843 | 0.010935354 | no |
| NUCB2        | 0.166816267  | 3.040661183  | 0.002553719 | 0.010935354 | no |
| ARHGAP27     | 0.16681549   | 3.040646629  | 0.002553838 | 0.010935354 | no |
| LIN52        | -0.166801496 | -3.040384235 | 0.002556002 | 0.010942438 | no |
| WDR5B        | -0.166741457 | -3.039258577 | 0.002565302 | 0.010979807 | no |
| FBXW11       | -0.166738555 | -3.03920417  | 0.002565753 | 0.010979807 | no |
| LCN2         | 0.166709251  | 3.038654758  | 0.002570304 | 0.010996457 | no |
| RTBDN        | -0.166706916 | -3.038610991 | 0.002570667 | 0.010996457 | no |
| ZNF441       | -0.166700841 | -3.038497098 | 0.002571611 | 0.010998309 | no |
| GPD1L        | -0.166669886 | -3.03791675  | 0.002576429 | 0.011016722 | no |
| CDH5         | 0.166644987  | 3.037449932  | 0.002580311 | 0.011031124 | no |
| LRP6         | -0.166638768 | -3.037333351 | 0.002581281 | 0.011033076 | no |
| COBRA1       | -0.166580314 | -3.036237491 | 0.002590417 | 0.011069924 | no |
| CDC5L        | -0.166575408 | -3.036145523 | 0.002591185 | 0.011071005 | no |
| NKX1-2       | -0.166547303 | -3.035618634 | 0.002595589 | 0.011087619 | no |
| PIRT         | 0.166541302  | 3.035506129  | 0.002596531 | 0.011088441 | no |
| SERPINA5     | 0.166539497  | 3.035472298  | 0.002596814 | 0.011088441 | no |
| FBX021       | -0.166506771 | -3.034858802 | 0.002601953 | 0.011108179 | no |
| EFEMP1       | 0.166501281  | 3.034755889  | 0.002602816 | 0.011108834 | no |
| SPANXE       | 0.166499218  | 3.034717215  | 0.00260314  | 0.011108834 | no |
| TDRD7        | 0.166485864  | 3.034466873  | 0.002605241 | 0.011115591 | no |
| ANKRD6       | -0.166467636 | -3.034125171 | 0.002608111 | 0.011125627 | no |
| EXOC5        | -0.166450603 | -3.033805865 | 0.002610795 | 0.011134867 | no |
| WDR48        | -0.166442664 | -3.033657038 | 0.002612047 | 0.011137997 | no |
| CC2D2B       | 0.166398781  | 3.032834426  | 0.002618977 | 0.011165332 | no |
| SLC9A8       | 0.166381963  | 3.032519177  | 0.002621638 | 0.011173631 | no |
| FGD5-AS1     | -0.166379903 | -3.032480565 | 0.002621964 | 0.011173631 | no |
| EXOC6        | -0.166365673 | -3.032213812 | 0.002624217 | 0.011181016 | no |
| NDUFAF2      | -0.166352279 | -3.031962755 | 0.002626339 | 0.011187833 | no |
| FAM108B1     | -0.166349006 | -3.031901405 | 0.002626858 | 0.011187833 | no |
| ESR1         | 0.166322452  | 3.031403654  | 0.002631071 | 0.011203557 | no |
| CBR1         | 0.166283916  | 3.030681323  | 0.002637196 | 0.011225901 | no |

|              |              |              |             |             |    |
|--------------|--------------|--------------|-------------|-------------|----|
| STMN1        | -0.166280332 | -3.03061414  | 0.002637767 | 0.011225901 | no |
| RUNDC3B      | -0.166278817 | -3.030585745 | 0.002638008 | 0.011225901 | no |
| LINC00574    | -0.166276303 | -3.030538624 | 0.002638408 | 0.011225901 | no |
| TTYH2        | -0.166244937 | -3.0299507   | 0.002643405 | 0.011244937 | no |
| ZNF524       | 0.166211367  | 3.029321468  | 0.002648763 | 0.011265499 | no |
| LYPD5        | -0.166202611 | -3.029157348 | 0.002650162 | 0.011269219 | no |
| GLDC         | -0.166181531 | -3.028762234 | 0.002653533 | 0.011281322 | no |
| RHPN2        | 0.166167619  | 3.028501489  | 0.00265576  | 0.011288556 | no |
| BAI1         | -0.166162211 | -3.028400119 | 0.002656626 | 0.011290005 | no |
| BAIAP2       | -0.166128348 | -3.027765429 | 0.002662056 | 0.011310842 | no |
| STAMBP       | -0.166077228 | -3.026807312 | 0.002670271 | 0.011343505 | no |
| SLC35G6      | -0.166062758 | -3.026536113 | 0.0026726   | 0.011351157 | no |
| SLFN11       | 0.166049271  | 3.026283346  | 0.002674773 | 0.011358141 | no |
| OAT          | -0.166026756 | -3.025861359 | 0.002678405 | 0.011370686 | no |
| CHTF18       | -0.166024394 | -3.025817092 | 0.002678786 | 0.011370686 | no |
| NELL1        | -0.166006602 | -3.025483658 | 0.002681659 | 0.011380633 | no |
| ARHGEF4      | -0.165978238 | -3.024952061 | 0.002686245 | 0.011397844 | no |
| LOC154761    | 0.165972018  | 3.024835488  | 0.002687251 | 0.011399865 | no |
| PPP2R2D      | -0.165944049 | -3.024311321 | 0.002691782 | 0.01141683  | no |
| IFIT3        | 0.165937695  | 3.024192246  | 0.002692812 | 0.011418946 | no |
| BATF3        | 0.165914672  | 3.02376078   | 0.002696548 | 0.011432532 | no |
| PRKACA       | 0.165882117  | 3.023150684  | 0.002701838 | 0.011452703 | no |
| WASH3P       | -0.165857069 | -3.022681273 | 0.002705915 | 0.011467724 | no |
| RPL13A       | -0.165834829 | -3.022264487 | 0.00270954  | 0.011480822 | no |
| LOC439994    | -0.165817243 | -3.021934938 | 0.002712409 | 0.011490714 | no |
| PTGER4P2-CDK | -0.165785402 | -3.021338253 | 0.002717612 | 0.011506764 | no |
| FRZB         | 0.165784332  | 3.021318201  | 0.002717787 | 0.011506764 | no |
| FKBP14       | 0.16578301   | 3.021293417  | 0.002718003 | 0.011506764 | no |
| BCO2         | 0.16578095   | 3.021254815  | 0.00271834  | 0.011506764 | no |
| METTL10      | -0.16573195  | -3.020336609 | 0.002726365 | 0.011538462 | no |
| CTAGE4       | 0.165674765  | 3.019265028  | 0.002735758 | 0.011575936 | no |
| SLC38A6      | 0.165663542  | 3.019054741  | 0.002737605 | 0.01158021  | no |
| RAET1G       | 0.165662079  | 3.01902732   | 0.002737846 | 0.01158021  | no |
| ZNF835       | -0.165650948 | -3.018818741 | 0.002739679 | 0.011585683 | no |
| SLC6A1-AS1   | -0.16563195  | -3.018462749 | 0.00274281  | 0.011596642 | no |
| PITPNM3      | -0.165622262 | -3.018281217 | 0.002744408 | 0.011601116 | no |
| ADAM6        | -0.165594984 | -3.017770089 | 0.002748912 | 0.01161787  | no |
| DKFZp779M065 | -0.165576681 | -3.017427134 | 0.002751938 | 0.011628371 | no |
| SRP19        | -0.165558903 | -3.01709403  | 0.00275488  | 0.011638513 | no |
| GRIN1        | -0.165528407 | -3.016522617 | 0.002759933 | 0.01165757  | no |
| FAM19A1      | -0.165498031 | -3.015953472 | 0.002764974 | 0.01167657  | no |
| BAIAP2L2     | -0.165469492 | -3.01541875  | 0.002769719 | 0.011694308 | no |
| LOC650293    | -0.165463662 | -3.015309512 | 0.002770689 | 0.011696106 | no |
| LOC100128593 | -0.165426675 | -3.014616516 | 0.002776851 | 0.011719815 | no |
| KNDC1        | -0.165423163 | -3.014550719 | 0.002777436 | 0.011719985 | no |
| MAPKAP1      | 0.165419607  | 3.01448409   | 0.00277803  | 0.011720187 | no |
| NFIL3        | 0.165405275  | 3.014215582  | 0.002780421 | 0.011727975 | no |
| IPO7         | -0.165334158 | -3.012883154 | 0.002792318 | 0.011775689 | no |
| MITF         | 0.165329261  | 3.012791412  | 0.002793139 | 0.011775689 | no |
| CALM1        | -0.165327841 | -3.012764805 | 0.002793377 | 0.011775689 | no |
| PSMA2        | 0.165315804  | 3.012539299  | 0.002795396 | 0.011781888 | no |

|              |              |              |             |             |    |
|--------------|--------------|--------------|-------------|-------------|----|
| ZFP30        | -0.165304741 | -3.012332032 | 0.002797252 | 0.011787401 | no |
| PNN          | -0.165290056 | -3.012056914 | 0.002799718 | 0.011795481 | no |
| PGGT1B       | 0.165248846  | 3.011284869  | 0.00280665  | 0.011822366 | no |
| PLIN5        | -0.165242958 | -3.011174564 | 0.002807641 | 0.011824225 | no |
| ZXDB         | -0.165219853 | -3.010741714 | 0.002811536 | 0.011838305 | no |
| ARHGAP19-SLI | -0.165195162 | -3.010279147 | 0.002815703 | 0.011853529 | no |
| ANKRD33B     | -0.165175448 | -3.009909839 | 0.002819034 | 0.011865228 | no |
| CBLN2        | -0.165160044 | -3.009621269 | 0.002821639 | 0.011873868 | no |
| RASSF9       | 0.165135204  | 3.009155932  | 0.002825845 | 0.011889239 | no |
| GPRASP2      | -0.165110535 | -3.0086938   | 0.002830027 | 0.011904506 | no |
| SLPI         | 0.165106609  | 3.008620248  | 0.002830694 | 0.011904978 | no |
| UBXN7        | -0.165067682 | -3.007891045 | 0.002837306 | 0.011930454 | no |
| RAB11FIP2    | -0.165050492 | -3.007569039 | 0.002840231 | 0.011940415 | no |
| TMEM9        | -0.165036015 | -3.007297841 | 0.002842696 | 0.011948442 | no |
| BICD2        | -0.165019674 | -3.006991733 | 0.002845481 | 0.011957809 | no |
| PDE2A        | -0.16498707  | -3.006380994 | 0.002851045 | 0.011978849 | no |
| FGF13        | -0.164950275 | -3.00569178  | 0.002857336 | 0.012002934 | no |
| C2orf24      | 0.164916114  | 3.005051895  | 0.002863188 | 0.012025167 | no |
| PGBD5        | -0.164879041 | -3.004357479 | 0.002869551 | 0.012049537 | no |
| FAM46B       | 0.164870516  | 3.0041978    | 0.002871016 | 0.012050509 | no |
| STK36        | 0.164869771  | 3.004183846  | 0.002871145 | 0.012050509 | no |
| FLJ16341     | -0.164867906 | -3.004148912 | 0.002871465 | 0.012050509 | no |
| CACNA2D3     | -0.164847236 | -3.00376175  | 0.002875021 | 0.012063075 | no |
| CEP250       | -0.164828796 | -3.003416371 | 0.002878196 | 0.01207404  | no |
| TCF7L1       | -0.164811695 | -3.003096063 | 0.002881143 | 0.012084047 | no |
| PMM1         | -0.164805154 | -3.002973537 | 0.002882272 | 0.012085946 | no |
| LHFPL3       | -0.164802549 | -3.002924749 | 0.002882721 | 0.012085946 | no |
| SLC15A2      | -0.16479407  | -3.002765936 | 0.002884184 | 0.012089722 | no |
| LOC440040    | -0.164706568 | -3.001127066 | 0.002899324 | 0.012148662 | no |
| AMZ2         | -0.164706268 | -3.001121438 | 0.002899376 | 0.012148662 | no |
| LRRC37BP1    | -0.16469288  | -3.0008707   | 0.002901699 | 0.012156025 | no |
| GNA14        | 0.164644177  | 2.999958561  | 0.002910163 | 0.012189107 | no |
| FAM124B      | 0.164619752  | 2.999501107  | 0.002914416 | 0.012204543 | no |
| ZNF248       | -0.164583881 | -2.998829319 | 0.002920673 | 0.012228361 | no |
| TOE1         | 0.164571721  | 2.998601575  | 0.002922797 | 0.01223487  | no |
| TBX18        | 0.16453861   | 2.997981483  | 0.002928586 | 0.012256719 | no |
| SHISA4       | -0.164513936 | -2.99751941  | 0.002932908 | 0.012272414 | no |
| LOC100131320 | -0.164502428 | -2.997303891 | 0.002934925 | 0.012278466 | no |
| ATG2B        | -0.164486324 | -2.997002315 | 0.00293775  | 0.012287893 | no |
| LOC730183    | -0.164463963 | -2.996583557 | 0.002941678 | 0.012300382 | no |
| SECISBP2L    | -0.164462807 | -2.996561907 | 0.002941881 | 0.012300382 | no |
| UBE2J2       | 0.164450538  | 2.996332157  | 0.002944038 | 0.012307005 | no |
| KIF16B       | 0.164434632  | 2.996034297  | 0.002946836 | 0.012316307 | no |
| CCDC74A      | 0.164416808  | 2.995700517  | 0.002949975 | 0.012327029 | no |
| NEURL        | -0.164409273 | -2.995559399 | 0.002951303 | 0.01233018  | no |
| EIF3I        | 0.164386361  | 2.995130355  | 0.002955343 | 0.012344662 | no |
| DLL1         | -0.164297214 | -2.99346102  | 0.002971113 | 0.012408123 | no |
| SYCE1        | -0.164286033 | -2.993251649 | 0.002973097 | 0.012413993 | no |
| SDHC         | 0.164244096  | 2.992466382  | 0.002980546 | 0.012442681 | no |
| ATP10D       | 0.164229316  | 2.992189634  | 0.002983176 | 0.01245124  | no |
| GTPBP6       | -0.164215937 | -2.991939113 | 0.002985558 | 0.012458762 | no |

|              |              |              |             |             |    |
|--------------|--------------|--------------|-------------|-------------|----|
| SLC16A5      | 0.164212403  | 2.991872939  | 0.002986188 | 0.01245897  | no |
| ZNF358       | -0.164153899 | -2.990777491 | 0.002996626 | 0.012500096 | no |
| KLRC3        | -0.16405438  | -2.988914164 | 0.003014459 | 0.012572044 | no |
| CDC42EP5     | 0.164007849  | 2.988042969  | 0.00302283  | 0.01260451  | no |
| REX01        | -0.163998076 | -2.987860011 | 0.003024591 | 0.012609405 | no |
| PXMP2        | -0.163973095 | -2.987392304 | 0.003029096 | 0.012624138 | no |
| GIPC2        | 0.163971968  | 2.987371209  | 0.0030293   | 0.012624138 | no |
| PSMB7        | -0.163953808 | -2.987031211 | 0.003032579 | 0.012635353 | no |
| LOC100270804 | -0.163929459 | -2.986575343 | 0.00303698  | 0.01265124  | no |
| RHOJ         | 0.163887999  | 2.98579915   | 0.003044489 | 0.01268006  | no |
| PALLD        | 0.163835796  | 2.984821857  | 0.003053966 | 0.012717069 | no |
| KCNB2        | -0.163795321 | -2.984064141 | 0.003061333 | 0.012743544 | no |
| TVP23A       | 0.16379435   | 2.98404595   | 0.00306151  | 0.012743544 | no |
| LRRN4CL      | 0.163777352  | 2.983727748  | 0.003064609 | 0.012752946 | no |
| SCNN1G       | 0.163773809  | 2.983661427  | 0.003065255 | 0.012752946 | no |
| PCDH9        | -0.163772197 | -2.983631245 | 0.003065549 | 0.012752946 | no |
| NAV2-AS4     | -0.163734816 | -2.98293146  | 0.003072376 | 0.012778618 | no |
| VWCE         | -0.163731897 | -2.982876826 | 0.00307291  | 0.012778618 | no |
| ACAP3        | -0.163708869 | -2.982445747 | 0.003077123 | 0.012792909 | no |
| CD200        | -0.163706607 | -2.982403397 | 0.003077537 | 0.012792909 | no |
| HTR6         | -0.163674472 | -2.981801852 | 0.003083425 | 0.012814908 | no |
| LIPG         | 0.163646233  | 2.981273244  | 0.003088608 | 0.012833967 | no |
| SLC25A37     | 0.163567111  | 2.979792179  | 0.003103173 | 0.012891994 | no |
| HLA-J        | 0.163553492  | 2.97953724   | 0.003105686 | 0.012899942 | no |
| MYCN         | -0.163498682 | -2.978511322 | 0.003115819 | 0.01293953  | no |
| ERBB2IP      | 0.163494216  | 2.978427728  | 0.003116646 | 0.012940463 | no |
| LOC100130417 | -0.163458133 | -2.977752344 | 0.003123335 | 0.012965731 | no |
| ALOX12B      | -0.163443333 | -2.977475328 | 0.003126082 | 0.01297463  | no |
| CUL3         | -0.163424194 | -2.977117108 | 0.003129638 | 0.012986881 | no |
| MTRNR2L1     | -0.163379804 | -2.976286259 | 0.0031379   | 0.013018651 | no |
| ATP2A2       | -0.163374217 | -2.976181695 | 0.003138941 | 0.013020457 | no |
| FERMT1       | -0.163334729 | -2.975442614 | 0.00314631  | 0.013048503 | no |
| FAM13C       | -0.163313956 | -2.97505383  | 0.003150192 | 0.013062083 | no |
| SENP3        | -0.1633101   | -2.974981662 | 0.003150913 | 0.013062381 | no |
| SNORD22      | -0.163307073 | -2.974925009 | 0.003151479 | 0.013062381 | no |
| HPS5         | 0.163270299  | 2.97423676   | 0.003158366 | 0.013088399 | no |
| SHANK1       | -0.163252726 | -2.973907874 | 0.003161661 | 0.013099529 | no |
| LZTS1        | 0.163242733  | 2.973720845  | 0.003163537 | 0.013104774 | no |
| NPEPL1       | 0.163231622  | 2.9735129    | 0.003165623 | 0.013110889 | no |
| APBB1        | -0.163222691 | -2.97334576  | 0.003167301 | 0.013115311 | no |
| ZNF410       | 0.163211554  | 2.973137335  | 0.003169394 | 0.013121452 | no |
| DLG5         | -0.163158093 | -2.972136818 | 0.003179462 | 0.013160029 | no |
| TOM1         | -0.163155571 | -2.972089628 | 0.003179937 | 0.013160029 | no |
| YJEFN3       | -0.163149414 | -2.971974396 | 0.003181099 | 0.013162199 | no |
| FAM188B      | 0.163146299  | 2.971916096  | 0.003181686 | 0.013162199 | no |
| MXRA7        | 0.163093891  | 2.970935325  | 0.00319159  | 0.013200626 | no |
| POU3F3       | -0.163078499 | -2.970647282 | 0.003194504 | 0.013210136 | no |
| AMDHD2       | 0.163033233  | 2.969800209  | 0.003203087 | 0.013243081 | no |
| FKBP7        | 0.163016184  | 2.969481166  | 0.003206325 | 0.01325392  | no |
| STAP2        | 0.163000526  | 2.969188146  | 0.003209302 | 0.013263674 | no |
| HOXB2        | 0.162977511  | 2.968757478  | 0.003213681 | 0.013279221 | no |

|            |              |              |             |             |    |
|------------|--------------|--------------|-------------|-------------|----|
| LOC441081  | 0.162937743  | 2.968013316  | 0.003221262 | 0.013307986 | no |
| SNN        | -0.162923892 | -2.967754122 | 0.003223906 | 0.013312795 | no |
| WBSCR27    | 0.16292214   | 2.967721338  | 0.003224241 | 0.013312795 | no |
| SORBS3     | 0.162921912  | 2.967717077  | 0.003224284 | 0.013312795 | no |
| C12orf70   | 0.162884982  | 2.967026034  | 0.003231345 | 0.01333649  | no |
| DNAJC16    | 0.162882245  | 2.96697482   | 0.003231868 | 0.01333649  | no |
| ATP5G2     | -0.162882158 | -2.966973194 | 0.003231885 | 0.01333649  | no |
| UCMA       | 0.162867697  | 2.966702598  | 0.003234654 | 0.013343143 | no |
| UCK2       | -0.162867254 | -2.966694309 | 0.003234739 | 0.013343143 | no |
| CYB561     | 0.162859867  | 2.966556087  | 0.003236154 | 0.013346419 | no |
| HPD        | 0.162850489  | 2.966380621  | 0.003237951 | 0.013351269 | no |
| YKT6       | 0.162802201  | 2.96547708   | 0.003247221 | 0.013386924 | no |
| METTL7B    | 0.162762354  | 2.964731507  | 0.003254889 | 0.013414423 | no |
| PNPLA4     | 0.162760757  | 2.964701618  | 0.003255197 | 0.013414423 | no |
| DPF2       | -0.162757811 | -2.964646507 | 0.003255764 | 0.013414423 | no |
| TNF        | 0.162739749  | 2.96430855   | 0.003259246 | 0.013423814 | no |
| ARF3       | -0.162739507 | -2.96430403  | 0.003259293 | 0.013423814 | no |
| DHX38      | -0.162729102 | -2.964109331 | 0.0032613   | 0.013429508 | no |
| MAMLD1     | -0.162724032 | -2.96401448  | 0.003262279 | 0.013430696 | no |
| EIF4E1B    | -0.162721132 | -2.963960218 | 0.003262839 | 0.013430696 | no |
| PLA2G2C    | 0.162716834  | 2.963879794  | 0.003263668 | 0.01343154  | no |
| PLA2G12A   | -0.162641892 | -2.962477634 | 0.003278169 | 0.013488633 | no |
| BEND4      | -0.162634619 | -2.962341558 | 0.003279579 | 0.013491596 | no |
| LOX        | 0.162631706  | 2.962287055  | 0.003280145 | 0.013491596 | no |
| NTRK1      | 0.162574754  | 2.961221534  | 0.003291209 | 0.013534516 | no |
| FYN        | -0.162505032 | -2.959917128 | 0.003304801 | 0.013585811 | no |
| ST3GAL6    | -0.162504284 | -2.959903135 | 0.003304947 | 0.013585811 | no |
| ODF2L      | 0.162500813  | 2.95983819   | 0.003305625 | 0.013586    | no |
| DPP9       | 0.162480288  | 2.959454207  | 0.003309637 | 0.013599888 | no |
| CENPT      | -0.162466188 | -2.959190423 | 0.003312396 | 0.013608621 | no |
| WASF2      | 0.162455085  | 2.9589827    | 0.003314569 | 0.013614949 | no |
| LRRC61     | 0.162428508  | 2.958485505  | 0.003319778 | 0.013632583 | no |
| GALNT6     | 0.162426706  | 2.9584518    | 0.003320131 | 0.013632583 | no |
| CRLF2      | 0.16241279   | 2.958191463  | 0.003322861 | 0.013641187 | no |
| LRFN4      | -0.162389477 | -2.957755345 | 0.00332744  | 0.013657375 | no |
| PPT2-EGFL8 | -0.162353527 | -2.957082823 | 0.003334512 | 0.013683787 | no |
| SOGA2      | -0.162345729 | -2.956936951 | 0.003336048 | 0.013687476 | no |
| ATL2       | -0.162327666 | -2.956599044 | 0.003339607 | 0.013699466 | no |
| RIMS3      | -0.162323732 | -2.956525448 | 0.003340383 | 0.013700033 | no |
| QPCT       | 0.162261355  | 2.955358594  | 0.003352705 | 0.013747947 | no |
| PCDH19     | -0.162251537 | -2.955174956 | 0.003354648 | 0.013751854 | no |
| POU2F1     | -0.162250076 | -2.955147608 | 0.003354938 | 0.013751854 | no |
| AFF1       | 0.162241553  | 2.954988188  | 0.003356626 | 0.013756148 | no |
| B3GAT1     | -0.162228895 | -2.954751404 | 0.003359134 | 0.013763803 | no |
| IFFO2      | 0.162196722  | 2.954149594  | 0.003365517 | 0.013787327 | no |
| NDUFA2     | 0.162170383  | 2.953656913  | 0.00337075  | 0.013806135 | no |
| EXT1       | 0.162137636  | 2.953044374  | 0.003377267 | 0.013830192 | no |
| RPL37A     | -0.162125927 | -2.952825364 | 0.0033796   | 0.013837109 | no |
| ZNF770     | -0.162035246 | -2.951129227 | 0.003397718 | 0.013908639 | no |
| MAPKBP1    | -0.162029925 | -2.951029699 | 0.003398784 | 0.013910269 | no |
| CROCCP3    | -0.162026796 | -2.950971174 | 0.003399411 | 0.013910269 | no |



|              |              |              |             |             |    |
|--------------|--------------|--------------|-------------|-------------|----|
| GATSL1       | -0.162012945 | -2.950712123 | 0.003402187 | 0.013918979 | no |
| GUCY2GP      | 0.161970811  | 2.94992406   | 0.003410645 | 0.013950927 | no |
| LOC728978    | 0.161948651  | 2.949509597  | 0.003415101 | 0.013964509 | no |
| CDK2AP2      | 0.161947837  | 2.949494372  | 0.003415265 | 0.013964509 | no |
| FRMD4B       | 0.161940207  | 2.949351665  | 0.003416801 | 0.01396813  | no |
| PTGR2        | -0.161931373 | -2.949186445 | 0.003418579 | 0.013972743 | no |
| N4BP1        | 0.161922245  | 2.949015722  | 0.003420418 | 0.013977601 | no |
| METTL21A     | -0.161901618 | -2.948629946 | 0.003424576 | 0.013986965 | no |
| HNF4G        | 0.161901562  | 2.948628897  | 0.003424588 | 0.013986965 | no |
| PAXBP1-AS1   | -0.161901194 | -2.948622006 | 0.003424662 | 0.013986965 | no |
| NAA16        | -0.161800183 | -2.94673288  | 0.003445093 | 0.014066598 | no |
| MAML3        | 0.161798328  | 2.946698191  | 0.003445469 | 0.014066598 | no |
| KDM4D        | -0.161766835 | -2.946109207 | 0.003451862 | 0.014090022 | no |
| PRPF39       | -0.161725196 | -2.945330514 | 0.003460331 | 0.01412191  | no |
| IKBKG        | 0.161718181  | 2.945199332  | 0.00346176  | 0.014125057 | no |
| ASTN2        | -0.161695257 | -2.944770617 | 0.003466432 | 0.014139455 | no |
| LOC646903    | -0.161694414 | -2.944754862 | 0.003466604 | 0.014139455 | no |
| GSX1         | -0.161675762 | -2.944406057 | 0.00347041  | 0.014152293 | no |
| IQCG         | 0.161669047  | 2.94428048   | 0.003471781 | 0.014155199 | no |
| ILK          | 0.161662043  | 2.944149494  | 0.003473212 | 0.014158346 | no |
| KIAA1199     | 0.161657995  | 2.944073804  | 0.003474039 | 0.014158612 | no |
| JAKMIP3      | -0.161655275 | -2.944022942 | 0.003474595 | 0.014158612 | no |
| WNT5A        | 0.161633559  | 2.943616849  | 0.003479036 | 0.014174021 | no |
| YTHDC1       | -0.161623106 | -2.943421377 | 0.003481175 | 0.014180049 | no |
| GRID1-AS1    | -0.161596734 | -2.942928206 | 0.003486578 | 0.014199366 | no |
| NNT          | -0.161579297 | -2.942602144 | 0.003490155 | 0.014211239 | no |
| TSR2         | -0.161558655 | -2.94221614  | 0.003494393 | 0.014225801 | no |
| RNASEH2C     | -0.161528866 | -2.941659115 | 0.003500518 | 0.014248035 | no |
| PCSK2        | -0.161524737 | -2.941581894 | 0.003501368 | 0.014248796 | no |
| THAP5        | -0.161500438 | -2.941127536 | 0.003506372 | 0.01426532  | no |
| COL12A1      | 0.161498575  | 2.941092692  | 0.003506756 | 0.01426532  | no |
| ARHGAP31     | -0.161468956 | -2.940538865 | 0.003512865 | 0.014283784 | no |
| FBXW7        | -0.16146754  | -2.940512386 | 0.003513157 | 0.014283784 | no |
| LONRF2       | -0.161465362 | -2.94047166  | 0.003513606 | 0.014283784 | no |
| PTBP2        | -0.161463684 | -2.940440278 | 0.003513953 | 0.014283784 | no |
| GHITM        | -0.161432967 | -2.939865923 | 0.0035203   | 0.014304296 | no |
| TFR2         | -0.161432822 | -2.939863205 | 0.00352033  | 0.014304296 | no |
| RIMKLA       | -0.161349054 | -2.938296909 | 0.003537694 | 0.014372132 | no |
| ALPK2        | 0.1613209    | 2.937770512  | 0.003543547 | 0.014393189 | no |
| AGAP6        | -0.161294298 | -2.937273118 | 0.003549085 | 0.014412962 | no |
| PRRC2B       | -0.161275665 | -2.936924744 | 0.003552969 | 0.014426008 | no |
| ADRBK1       | 0.161268034  | 2.936782067  | 0.003554561 | 0.014429745 | no |
| TCEAL3       | -0.161234383 | -2.936152899 | 0.003561588 | 0.014455542 | no |
| ORC4         | -0.16116525  | -2.934860381 | 0.003576064 | 0.014511555 | no |
| STX1A        | -0.161121428 | -2.934041095 | 0.003585268 | 0.014546157 | no |
| LOC100505687 | -0.161115811 | -2.933936088 | 0.003586449 | 0.014548203 | no |
| RAP1GAP      | -0.161106547 | -2.933762886 | 0.003588398 | 0.014553362 | no |
| TXN          | 0.161091536  | 2.933482264  | 0.003591558 | 0.014563429 | no |
| SUSD4        | -0.161077791 | -2.933225299 | 0.003594454 | 0.014572422 | no |
| MOB4         | -0.161062517 | -2.932939755 | 0.003597674 | 0.014582727 | no |
| SLC44A2      | -0.161044291 | -2.932599022 | 0.00360152  | 0.014595564 | no |

|              |              |              |             |             |    |
|--------------|--------------|--------------|-------------|-------------|----|
| RPL17        | -0.161019347 | -2.932132692 | 0.00360679  | 0.014614166 | no |
| GJD2         | -0.161004814 | -2.931861003 | 0.003609864 | 0.014622517 | no |
| ACTN4        | 0.161003167  | 2.931830221  | 0.003610212 | 0.014622517 | no |
| KIAA1984     | -0.160962161 | -2.931063646 | 0.003618898 | 0.014654936 | no |
| CNOT6        | -0.160935552 | -2.930566218 | 0.003624545 | 0.014675037 | no |
| ADA          | 0.160931364  | 2.930487925  | 0.003625434 | 0.014675873 | no |
| HIF1A-AS2    | 0.160925082  | 2.9303705    | 0.003626769 | 0.01467851  | no |
| MAGI2        | -0.160919115 | -2.930258958 | 0.003628037 | 0.014680877 | no |
| TIMM13       | -0.160893461 | -2.929779397 | 0.003633493 | 0.014700188 | no |
| GPR21        | -0.160875853 | -2.92945025  | 0.003637242 | 0.014712586 | no |
| 40057        | 0.160838416  | 2.928750432  | 0.003645225 | 0.014742103 | no |
| ZNF404       | -0.160790815 | -2.927860637 | 0.003655398 | 0.014780464 | no |
| CFL1         | 0.160782751  | 2.927709911  | 0.003657124 | 0.014782667 | no |
| C7orf49      | 0.160781842  | 2.927692924  | 0.003657319 | 0.014782667 | no |
| TMOD1        | 0.160768413  | 2.927441902  | 0.003660195 | 0.01479151  | no |
| MOCOS        | 0.16075064   | 2.927109692  | 0.003664004 | 0.014804121 | no |
| ABHD14A-ACY1 | -0.160722103 | -2.926576271 | 0.003670129 | 0.014826078 | no |
| LOC100130744 | 0.160714559  | 2.926435257  | 0.003671749 | 0.014829837 | no |
| MIR3911      | -0.160692881 | -2.926030058 | 0.00367641  | 0.014845869 | no |
| HLA-C        | 0.160678692  | 2.925764853  | 0.003679463 | 0.014855407 | no |
| SSR1         | 0.160664181  | 2.92549363   | 0.003682587 | 0.01486523  | no |
| AMZ1         | -0.160654008 | -2.925303487 | 0.00368478  | 0.014871286 | no |
| FAM98B       | -0.160631515 | -2.924883055 | 0.003689631 | 0.014888069 | no |
| PMCH         | 0.160601945  | 2.924330376  | 0.003696017 | 0.014909538 | no |
| RNF115       | 0.160600455  | 2.924302527  | 0.003696339 | 0.014909538 | no |
| NDUFAF4      | -0.160571965 | -2.923770029 | 0.003702502 | 0.014931595 | no |
| TXNIP        | 0.160562921  | 2.923601003  | 0.00370446  | 0.014936689 | no |
| AN08         | -0.160519586 | -2.922791066 | 0.003713857 | 0.014971768 | no |
| SP4          | -0.160510921 | -2.922629124 | 0.003715738 | 0.014976543 | no |
| GNAI2        | 0.160468583  | 2.921837839  | 0.003724943 | 0.01501083  | no |
| TMEM254      | -0.160437401 | -2.921255059 | 0.003731736 | 0.015032809 | no |
| CD300LG      | -0.160437126 | -2.921249924 | 0.003731796 | 0.015032809 | no |
| TCF7L2       | -0.160417447 | -2.920882147 | 0.003736089 | 0.015047281 | no |
| SUGT1P3      | -0.160384635 | -2.920268928 | 0.003743257 | 0.015073325 | no |
| ESRRB        | 0.160365465  | 2.919910669  | 0.00374745  | 0.015087383 | no |
| MRPL24       | -0.1603153   | -2.918973166 | 0.003758444 | 0.01512881  | no |
| ZNF32        | -0.16029154  | -2.918529149 | 0.003763661 | 0.015146973 | no |
| LLGL1        | -0.160288023 | -2.91846343  | 0.003764434 | 0.015147247 | no |
| MRPS31       | -0.160277908 | -2.918274394 | 0.003766657 | 0.015153356 | no |
| CLEC2L       | -0.160244843 | -2.917656505 | 0.003773933 | 0.015179787 | no |
| ARHGAP10     | 0.160146283  | 2.915814714  | 0.003795699 | 0.015264476 | no |
| TPRN         | -0.160133989 | -2.915584989 | 0.003798421 | 0.015272568 | no |
| CDC42EP3     | 0.160120807  | 2.915338671  | 0.003801343 | 0.015281455 | no |
| HTT          | -0.160089927 | -2.914761636 | 0.003808195 | 0.015306137 | no |
| TMEM64       | 0.160072839  | 2.914442337  | 0.003811991 | 0.01531853  | no |
| HSPB11       | 0.160049453  | 2.91400536   | 0.003817192 | 0.015336563 | no |
| CDA          | 0.159989794  | 2.912890604  | 0.003830489 | 0.015387112 | no |
| CATSPER1     | 0.159960268  | 2.912338915  | 0.003837086 | 0.01541073  | no |
| LOC283038    | -0.159956164 | -2.912262243 | 0.003838004 | 0.015411535 | no |
| TAF3         | -0.159884798 | -2.910928804 | 0.003853994 | 0.015472852 | no |
| CES2         | -0.159871411 | -2.910678679 | 0.003857    | 0.015482029 | no |

|              |              |              |             |             |    |
|--------------|--------------|--------------|-------------|-------------|----|
| LOC100132077 | -0.15985848  | -2.910437088 | 0.003859906 | 0.015490799 | no |
| FLT3         | 0.159844336  | 2.910172825  | 0.003863086 | 0.015499102 | no |
| KCNAB1       | -0.159842679 | -2.910141858 | 0.003863459 | 0.015499102 | no |
| HLCS         | 0.159839661  | 2.910085474  | 0.003864138 | 0.015499102 | no |
| PAPOLG       | 0.159830086  | 2.909906582  | 0.003866293 | 0.015504852 | no |
| MAD2L1BP     | -0.15981354  | -2.90959744  | 0.00387002  | 0.015515078 | no |
| ABLIM1       | -0.159812354 | -2.909575283 | 0.003870287 | 0.015515078 | no |
| ZNF683       | 0.159796768  | 2.90928408   | 0.0038738   | 0.015526267 | no |
| SOX15        | -0.159784554 | -2.90905589  | 0.003876556 | 0.015534414 | no |
| PLEKHN1      | 0.159777849  | 2.908930611  | 0.003878069 | 0.015537581 | no |
| ZNF287       | -0.159772869 | -2.908837581 | 0.003879193 | 0.015538572 | no |
| C11orf30     | -0.159770349 | -2.908790502 | 0.003879762 | 0.015538572 | no |
| CMYA5        | 0.159766624  | 2.908720897  | 0.003880604 | 0.015539046 | no |
| NCOA2        | -0.159737835 | -2.908183046 | 0.003887112 | 0.015562205 | no |
| CBY3         | -0.159729577 | -2.908028767 | 0.00388898  | 0.015566786 | no |
| THAP6        | 0.159721696  | 2.907881533  | 0.003890764 | 0.015571026 | no |
| TXNDC9       | 0.159686256  | 2.90721942   | 0.003898796 | 0.015600264 | no |
| POLR1D       | 0.159674808  | 2.907005557  | 0.003901393 | 0.015607752 | no |
| SLC1A2       | -0.159638909 | -2.906334881 | 0.003909549 | 0.015637469 | no |
| DYNC1LI1     | -0.159625441 | -2.90608328  | 0.003912613 | 0.015646811 | no |
| SPECC1       | -0.159581254 | -2.905257799 | 0.00392268  | 0.015684152 | no |
| LRTM2        | -0.159532808 | -2.904352784 | 0.003933744 | 0.015725464 | no |
| HNRNPH2      | -0.159512086 | -2.903965676 | 0.003938485 | 0.015739664 | no |
| LOH12CR2     | -0.159510881 | -2.903943174 | 0.003938761 | 0.015739664 | no |
| RAB6C        | -0.159484645 | -2.90345306  | 0.003944772 | 0.015760753 | no |
| ZNF518B      | 0.159455855  | 2.902915269  | 0.003951377 | 0.015784208 | no |
| ATG14        | -0.159426375 | -2.902364581 | 0.003958151 | 0.015808329 | no |
| PNMA5        | -0.159402616 | -2.90192077  | 0.003963618 | 0.015826703 | no |
| NTRK3        | -0.159399982 | -2.901871571 | 0.003964224 | 0.015826703 | no |
| TCTE3        | -0.159391009 | -2.901703963 | 0.003966291 | 0.015826859 | no |
| SUMO2        | -0.159390401 | -2.901692591 | 0.003966431 | 0.015826859 | no |
| GPAA1        | 0.15939022   | 2.901689218  | 0.003966473 | 0.015826859 | no |
| ADAM17       | 0.159363053  | 2.901181747  | 0.003972736 | 0.015848909 | no |
| TP73-AS1     | 0.159326776  | 2.90050413   | 0.003981114 | 0.015877909 | no |
| TEAD4        | 0.159325179  | 2.90047431   | 0.003981483 | 0.015877909 | no |
| C7orf60      | -0.15930993  | -2.900189461 | 0.00398501  | 0.015889026 | no |
| ANP32A       | -0.159270999 | -2.899462298 | 0.003994026 | 0.015922022 | no |
| TRERF1       | -0.159263783 | -2.899327509 | 0.0039957   | 0.015925739 | no |
| RTN4RL2      | -0.15925168  | -2.899101451 | 0.003998508 | 0.015933975 | no |
| ELOVL4       | -0.159218116 | -2.89847454  | 0.004006304 | 0.015962082 | no |
| ST8SIA1      | -0.159186331 | -2.897880862 | 0.004013699 | 0.015986493 | no |
| CTAGE15P     | 0.159185391  | 2.897863306  | 0.004013918 | 0.015986493 | no |
| DHRS4L2      | 0.159177819  | 2.897721882  | 0.004015682 | 0.015990554 | no |
| TBC1D14      | -0.159174047 | -2.897651419 | 0.004016561 | 0.015991091 | no |
| MECP2        | -0.159156492 | -2.89732354  | 0.004020653 | 0.01600442  | no |
| MST1         | -0.159144176 | -2.897093509 | 0.004023527 | 0.016012892 | no |
| GSTM3        | -0.159121997 | -2.896679282 | 0.004028706 | 0.016030535 | no |
| B3GALNT2     | 0.159097871  | 2.896228673  | 0.004034347 | 0.016050009 | no |
| HAUS4        | 0.159089645  | 2.896075039  | 0.004036272 | 0.016054695 | no |
| ASGR2        | 0.159081209  | 2.895917478  | 0.004038247 | 0.01605691  | no |
| LUM          | 0.159080883  | 2.895911404  | 0.004038323 | 0.01605691  | no |

|           |              |              |             |             |    |
|-----------|--------------|--------------|-------------|-------------|----|
| TRPC5     | -0.159038052 | -2.895111459 | 0.004048364 | 0.016093856 | no |
| LINC00657 | -0.158978404 | -2.893997475 | 0.004062384 | 0.016146606 | no |
| STK39     | -0.158928312 | -2.893061978 | 0.004074192 | 0.016190545 | no |
| CCL4      | 0.15891635   | 2.892838598  | 0.004077017 | 0.016193821 | no |
| MURC      | -0.158915301 | -2.892819001 | 0.004077264 | 0.016193821 | no |
| ADAT1     | 0.158915247  | 2.892817986  | 0.004077277 | 0.016193821 | no |
| LRRC41    | 0.158871569  | 2.892002301  | 0.004087606 | 0.016231844 | no |
| NIM1      | -0.158855338 | -2.891699204 | 0.00409145  | 0.016244107 | no |
| MSX2P1    | -0.158834089 | -2.891302382 | 0.004096488 | 0.016261104 | no |
| PRH1-PRR4 | -0.158825837 | -2.891148291 | 0.004098445 | 0.01626587  | no |
| HAGH      | -0.158815329 | -2.890952054 | 0.00410094  | 0.016270493 | no |
| LY6E      | 0.158813646  | 2.890920631  | 0.004101339 | 0.016270493 | no |
| ZKSCAN7   | -0.158811363 | -2.890877999 | 0.004101881 | 0.016270493 | no |
| KIAA0825  | 0.1588063    | 2.890783453  | 0.004103084 | 0.01627226  | no |
| C16orf93  | 0.158798808  | 2.890643538  | 0.004104864 | 0.016276316 | no |
| C14orf159 | -0.158777519 | -2.890245979 | 0.004109926 | 0.016293382 | no |
| VWA5A     | 0.158766866  | 2.890047061  | 0.004112461 | 0.016300425 | no |
| KCNE4     | 0.15874549   | 2.889647891  | 0.004117552 | 0.016313963 | no |
| DPYS      | 0.158743234  | 2.889605756  | 0.00411809  | 0.016313963 | no |
| BASP1     | -0.158742966 | -2.889600752 | 0.004118154 | 0.016313963 | no |
| ZNF780B   | -0.158739607 | -2.889538028 | 0.004118955 | 0.016314127 | no |
| LINC00475 | 0.158730874  | 2.889374953  | 0.004121037 | 0.016319367 | no |
| FRS2      | -0.158710931 | -2.889002559 | 0.004125795 | 0.016335201 | no |
| ADAM10    | 0.158704558  | 2.888883545  | 0.004127317 | 0.016338216 | no |
| CSNK1G1   | 0.158684988  | 2.888518116  | 0.004131993 | 0.016353714 | no |
| EPM2A     | -0.158675822 | -2.888346949 | 0.004134185 | 0.016359377 | no |
| C1orf106  | -0.15866828  | -2.888206119 | 0.004135989 | 0.016363503 | no |
| TNFRSF6B  | 0.158622239  | 2.887346423  | 0.004147019 | 0.016404119 | no |
| KCTD6     | -0.158574029 | -2.88644623  | 0.004158596 | 0.016446889 | no |
| LOC158696 | -0.158552498 | -2.886044209 | 0.004163776 | 0.016464346 | no |
| DOPEY2    | 0.158373111  | 2.882694863  | 0.004207162 | 0.016629931 | no |
| STUB1     | -0.158372953 | -2.882691914 | 0.0042072   | 0.016629931 | no |
| CLGN      | -0.158356146 | -2.882378131 | 0.004211286 | 0.016643019 | no |
| MCTS1     | 0.158344528  | 2.882161213  | 0.004214112 | 0.016651128 | no |
| N6AMT1    | -0.15833674  | -2.882015811 | 0.004216008 | 0.016655555 | no |
| C16orf87  | -0.158331075 | -2.881910041 | 0.004217387 | 0.016657943 | no |
| C12orf54  | -0.158292523 | -2.881190303 | 0.004226784 | 0.016691993 | no |
| SFRP2     | -0.158282183 | -2.880997249 | 0.004229308 | 0.016698891 | no |
| ZIC3      | -0.158276888 | -2.880898397 | 0.004230601 | 0.016700928 | no |
| MPPED1    | -0.1582611   | -2.880603647 | 0.004234458 | 0.016712012 | no |
| SLITRK4   | -0.158257757 | -2.88054123  | 0.004235276 | 0.016712012 | no |
| GPR3      | 0.158255849  | 2.880505613  | 0.004235742 | 0.016712012 | no |
| ASIC2     | -0.158239404 | -2.880198614 | 0.004239764 | 0.01672481  | no |
| RAPGEF1   | 0.158223265  | 2.879897303  | 0.004243715 | 0.016737323 | no |
| FBXW4     | -0.158152864 | -2.878583023 | 0.004260987 | 0.016801574 | no |
| NMNAT1    | 0.158147935  | 2.878491011  | 0.004262198 | 0.016801574 | no |
| WARS      | 0.158147316  | 2.878479452  | 0.004262351 | 0.016801574 | no |
| AMMECR1   | -0.15812278  | -2.878021417 | 0.004268387 | 0.016822282 | no |
| ZMYM2     | -0.15810612  | -2.8777104   | 0.00427249  | 0.016835366 | no |
| RETN      | 0.158096648  | 2.877533592  | 0.004274824 | 0.016841476 | no |
| KIF22     | -0.15808998  | -2.877409104 | 0.004276469 | 0.01684333  | no |

|             |              |              |             |             |    |
|-------------|--------------|--------------|-------------|-------------|----|
| C10orf88    | -0.158088382 | -2.877379273 | 0.004276863 | 0.01684333  | no |
| C4B_2       | 0.158074667  | 2.877123256  | 0.004280246 | 0.016853567 | no |
| LOC642361   | -0.158061254 | -2.876872865 | 0.004283557 | 0.016863516 | no |
| AEN         | 0.158052515  | 2.876709726  | 0.004285716 | 0.016867024 | no |
| SLC17A3     | 0.158051292  | 2.87668691   | 0.004286018 | 0.016867024 | no |
| WSB1        | -0.158044918 | -2.876567925 | 0.004287594 | 0.016868417 | no |
| PRR24       | 0.158043509  | 2.87654161   | 0.004287942 | 0.016868417 | no |
| TRABD2B     | 0.158033125  | 2.876347783  | 0.004290509 | 0.016875102 | no |
| ZBTB39      | -0.158030285 | -2.876294764 | 0.004291212 | 0.016875102 | no |
| ACE         | 0.158007008  | 2.875860254  | 0.004296973 | 0.016894667 | no |
| SNCB        | -0.157993757 | -2.875612894 | 0.004300256 | 0.016904483 | no |
| ME1         | 0.157977223  | 2.875304254  | 0.004304356 | 0.016917503 | no |
| HMG20A      | -0.157949001 | -2.874777466 | 0.004311361 | 0.016941938 | no |
| C20orf26    | 0.157907204  | 2.873997273  | 0.004321755 | 0.016979678 | no |
| ADM         | 0.157882968  | 2.873544885  | 0.004327793 | 0.017000291 | no |
| RNF185      | -0.157865772 | -2.873223899 | 0.004332081 | 0.017014027 | no |
| BBS10       | -0.157836174 | -2.872671454 | 0.004339471 | 0.017039936 | no |
| L3HYPDH     | 0.157832693  | 2.872606476  | 0.004340341 | 0.017040238 | no |
| PRSS35      | -0.157818474 | -2.87234108  | 0.004343896 | 0.01705108  | no |
| GNG13       | -0.157798206 | -2.87196277  | 0.004348967 | 0.017067806 | no |
| KLB         | -0.1577951   | -2.871904793 | 0.004349745 | 0.017067806 | no |
| CGREF1      | -0.157774307 | -2.871516694 | 0.004354955 | 0.017085128 | no |
| PELI3       | -0.157749736 | -2.871058094 | 0.004361118 | 0.017106185 | no |
| TRAPPC6B    | -0.157732796 | -2.870741905 | 0.004365372 | 0.017119746 | no |
| IQCH        | 0.157721924  | 2.870538985  | 0.004368104 | 0.017127335 | no |
| ACVR2A      | -0.157695944 | -2.870054092 | 0.004374639 | 0.017148086 | no |
| LEPRE1      | 0.157694539  | 2.870027872  | 0.004374992 | 0.017148086 | no |
| FAM181A     | 0.157689915  | 2.869941573  | 0.004376156 | 0.017149521 | no |
| C7orf63     | 0.157669499  | 2.869560519  | 0.004381299 | 0.017163581 | no |
| SENP8       | -0.157669333 | -2.869557424 | 0.004381341 | 0.017163581 | no |
| APOC2       | 0.157639502  | 2.869000668  | 0.004388866 | 0.017188365 | no |
| ZFP62       | -0.157637911 | -2.868970971 | 0.004389268 | 0.017188365 | no |
| APBB2       | -0.157582716 | -2.867940864 | 0.004403222 | 0.017239869 | no |
| SNRNP25     | -0.157540583 | -2.867154535 | 0.004413901 | 0.017278532 | no |
| SYT5        | -0.157510226 | -2.866587998 | 0.00442161  | 0.017305557 | no |
| DRG1        | -0.157505718 | -2.866503876 | 0.004422755 | 0.017306889 | no |
| CHP2        | -0.157471885 | -2.865872478 | 0.004431363 | 0.017335242 | no |
| GLRX5       | -0.15746794  | -2.86579885  | 0.004432368 | 0.017335242 | no |
| MYBPC2      | 0.157467732  | 2.865794962  | 0.004432421 | 0.017335242 | no |
| PSMC4       | 0.15742826   | 2.865058356  | 0.004442484 | 0.017371439 | no |
| VSTM2L      | -0.157425009 | -2.864997676 | 0.004443314 | 0.017371524 | no |
| LRSAM1      | -0.157419217 | -2.864889598 | 0.004444793 | 0.017374144 | no |
| GLTSCR1L    | -0.157387508 | -2.864297862 | 0.004452896 | 0.017402653 | no |
| RTN1        | -0.157377545 | -2.864111943 | 0.004455445 | 0.017408041 | no |
| CHURC1-FNTB | -0.157375787 | -2.864079128 | 0.004455895 | 0.017408041 | no |
| PAQR9       | -0.157355238 | -2.863695663 | 0.004461156 | 0.017425428 | no |
| C2orf66     | 0.15734968   | 2.863591944  | 0.00446258  | 0.017427824 | no |
| GTF2I       | -0.157339182 | -2.863396048 | 0.004465271 | 0.017435164 | no |
| CTSA        | 0.15731662   | 2.862975018  | 0.004471059 | 0.017454594 | no |
| RILPL1      | -0.15730269  | -2.862715078 | 0.004474637 | 0.017465386 | no |
| RELL1       | 0.157296513  | 2.862599818  | 0.004476223 | 0.017468407 | no |

|              |              |              |             |             |    |
|--------------|--------------|--------------|-------------|-------------|----|
| DCTN1        | -0.157268653 | -2.862079934 | 0.004483388 | 0.017493189 | no |
| MTX1         | 0.157256512  | 2.861853387  | 0.004486513 | 0.017501039 | no |
| BRD7         | -0.157254511 | -2.861816051 | 0.004487028 | 0.017501039 | no |
| MAFF         | 0.157239815  | 2.861541815  | 0.004490814 | 0.017512628 | no |
| PCBP3        | -0.157200873 | -2.860815159 | 0.004500861 | 0.017548621 | no |
| LOC643723    | -0.157161019 | -2.860071515 | 0.004511163 | 0.017585599 | no |
| SMPD2        | 0.157125959  | 2.859417333  | 0.004520244 | 0.017617803 | no |
| LOC100505540 | -0.157120959 | -2.859324041 | 0.00452154  | 0.01761966  | no |
| SATB2-AS1    | -0.157024992 | -2.857533448 | 0.004546487 | 0.017713662 | no |
| CCNB3        | -0.156999538 | -2.857058526 | 0.004553125 | 0.017736308 | no |
| UTP14C       | -0.156992703 | -2.856930996 | 0.004554909 | 0.017739398 | no |
| APOM         | -0.15698996  | -2.856879814 | 0.004555625 | 0.017739398 | no |
| ZNF32-AS1    | -0.156987013 | -2.85682483  | 0.004556395 | 0.017739398 | no |
| LGALS17A     | 0.156943506  | 2.856013108  | 0.004567767 | 0.017780455 | no |
| SLC25A3      | -0.156927913 | -2.855722176 | 0.00457185  | 0.017791169 | no |
| LOC144486    | -0.156926669 | -2.855698979 | 0.004572176 | 0.017791169 | no |
| HSPB6        | 0.156919125  | 2.855558222  | 0.004574152 | 0.017795637 | no |
| LOC494558    | 0.15690776   | 2.855346195  | 0.004577131 | 0.017802281 | no |
| NDUFS2       | -0.156906289 | -2.855318745 | 0.004577516 | 0.017802281 | no |
| LPPR2        | -0.15689772  | -2.855158868 | 0.004579764 | 0.017807799 | no |
| MYO16        | -0.15686436  | -2.854536487 | 0.004588522 | 0.017838627 | no |
| ARPC5        | 0.15685304   | 2.854325287  | 0.004591498 | 0.017846967 | no |
| SMG6         | -0.156834962 | -2.853988029 | 0.004596253 | 0.01786222  | no |
| DDB1         | -0.156817028 | -2.853653444 | 0.004600975 | 0.017877337 | no |
| SOD3         | 0.156808664  | 2.853497408  | 0.004603179 | 0.017882667 | no |
| DBF4B        | -0.156769662 | -2.852769784 | 0.004613467 | 0.017919397 | no |
| SIRT3        | -0.156716058 | -2.851769774 | 0.004627641 | 0.017971204 | no |
| STOX1        | -0.156698896 | -2.851449619 | 0.004632188 | 0.017985609 | no |
| CNNM3        | -0.156691616 | -2.851313807 | 0.004634117 | 0.017989851 | no |
| ARL8A        | -0.156675946 | -2.851021489 | 0.004638273 | 0.018002734 | no |
| KIAA1045     | -0.156660792 | -2.850738786 | 0.004642296 | 0.018015093 | no |
| PROC         | 0.156646092  | 2.850464575  | 0.004646201 | 0.018026991 | no |
| HMGN4        | 0.156635468  | 2.850266386  | 0.004649025 | 0.018033365 | no |
| LRGUK        | 0.1566336    | 2.850231533  | 0.004649522 | 0.018033365 | no |
| EIF3E        | -0.156624577 | -2.850063225 | 0.004651922 | 0.018039417 | no |
| MYO18A       | -0.156613564 | -2.849857786 | 0.004654852 | 0.018047525 | no |
| CACNA1B      | -0.156593774 | -2.849488616 | 0.004660123 | 0.018064701 | no |
| TP53TG1      | 0.156558767  | 2.848835586  | 0.00466946  | 0.01809763  | no |
| TYK2         | 0.15654414   | 2.848562744  | 0.004673366 | 0.018109503 | no |
| AMOTL2       | -0.156495177 | -2.847649408 | 0.004686463 | 0.01815698  | no |
| CASP6        | 0.156474957  | 2.847272256  | 0.004691881 | 0.018174694 | no |
| DBN1         | -0.156467809 | -2.847138918 | 0.004693797 | 0.018176949 | no |
| NISCH        | -0.156466479 | -2.847114107 | 0.004694154 | 0.018176949 | no |
| ZNF608       | -0.156424511 | -2.846331292 | 0.004705423 | 0.018217301 | no |
| LOC100240735 | 0.156412172  | 2.84610114   | 0.00470874  | 0.018226862 | no |
| FAM49B       | 0.156405945  | 2.845984993  | 0.004710416 | 0.018230063 | no |
| VNN3         | 0.156376066  | 2.845427668  | 0.004718461 | 0.018257912 | no |
| ZNF800       | 0.156356847  | 2.845069192  | 0.004723642 | 0.01827239  | no |
| LRRC19       | -0.156355881 | -2.845051183 | 0.004723903 | 0.01827239  | no |
| CCDC144A     | -0.156323584 | -2.844448788 | 0.004732622 | 0.018302822 | no |
| EAPP         | -0.156303584 | -2.844075742 | 0.004738029 | 0.018320436 | no |

|             |              |              |             |             |    |
|-------------|--------------|--------------|-------------|-------------|----|
| TAOK1       | -0.156295136 | -2.843918183 | 0.004740314 | 0.018325975 | no |
| DGKK        | -0.156266494 | -2.843383971 | 0.00474807  | 0.018352658 | no |
| SEC24A      | 0.156238799  | 2.842867425  | 0.004755581 | 0.018378383 | no |
| GBAP1       | -0.156208921 | -2.842310184 | 0.004763695 | 0.018406432 | no |
| KCNQ5       | -0.156189986 | -2.841957042 | 0.004768844 | 0.018423014 | no |
| HTR1D       | 0.156178739  | 2.841747271  | 0.004771905 | 0.018431526 | no |
| TCEAL1      | -0.156174002 | -2.841658919 | 0.004773195 | 0.018433194 | no |
| CCNB1IP1    | -0.156148957 | -2.841191836 | 0.004780018 | 0.018454386 | no |
| GSE1        | -0.156147558 | -2.841165748 | 0.0047804   | 0.018454386 | no |
| BTG3        | 0.156143328  | 2.841086849  | 0.004781553 | 0.018455524 | no |
| NUBPL       | -0.156107806 | -2.840424369 | 0.004791249 | 0.018489628 | no |
| LOC284578   | -0.156072263 | -2.839761498 | 0.004800969 | 0.018521334 | no |
| FLVCR1      | -0.156071459 | -2.839746509 | 0.004801189 | 0.018521334 | no |
| SHANK2-AS1  | -0.156064153 | -2.839610263 | 0.004803189 | 0.018525724 | no |
| GFER        | -0.156001921 | -2.838449681 | 0.004820257 | 0.018588218 | no |
| LOC150935   | -0.155984719 | -2.838128885 | 0.004824984 | 0.018600278 | no |
| GAS5        | -0.155984243 | -2.838120013 | 0.004825115 | 0.018600278 | no |
| SUGT1P1     | -0.155958705 | -2.83764377  | 0.004832141 | 0.018624023 | no |
| MARVELD3    | -0.155936772 | -2.83723476  | 0.004838183 | 0.018643965 | no |
| EFNA2       | -0.155932287 | -2.837151108 | 0.00483942  | 0.018645387 | no |
| C1orf220    | -0.155919899 | -2.836920104 | 0.004842836 | 0.018655204 | no |
| RNF165      | -0.155829312 | -2.835230868 | 0.004867883 | 0.018748328 | no |
| KIAA0020    | 0.155816693  | 2.834995557  | 0.004871381 | 0.018758414 | no |
| C2orf68     | -0.15581357  | -2.834937327 | 0.004872247 | 0.018758414 | no |
| GPIHBP1     | -0.15580983  | -2.83486758  | 0.004873285 | 0.018759048 | no |
| ZNF154      | -0.155770832 | -2.83414039  | 0.004884115 | 0.018797369 | no |
| PPM1H       | -0.155764469 | -2.83402174  | 0.004885884 | 0.01880081  | no |
| FADS3       | 0.155719285  | 2.833179226  | 0.004898462 | 0.018845838 | no |
| UBE2K       | -0.155699355 | -2.832807598 | 0.00490402  | 0.018863843 | no |
| SLC25A15    | -0.155689931 | -2.83263188  | 0.00490665  | 0.018870581 | no |
| PARP6       | -0.155678874 | -2.832425714 | 0.004909737 | 0.018879075 | no |
| TCL1A       | 0.155658878  | 2.832052868  | 0.004915324 | 0.01889443  | no |
| TBCD        | -0.155658291 | -2.832041929 | 0.004915488 | 0.01889443  | no |
| SNAP25      | -0.155650451 | -2.831895744 | 0.004917681 | 0.018899477 | no |
| KLHL13      | -0.155639477 | -2.831691119 | 0.004920751 | 0.018907896 | no |
| LOC729080   | -0.155602705 | -2.831005496 | 0.004931051 | 0.018944087 | no |
| DUSP18      | 0.155572904  | 2.83044985   | 0.004939413 | 0.018972043 | no |
| NUDT21      | -0.155570481 | -2.83040468  | 0.004940094 | 0.018972043 | no |
| FNDC8       | -0.155566467 | -2.83032983  | 0.004941221 | 0.018972983 | no |
| EXOC3L1     | 0.155515619  | 2.829381794  | 0.004955523 | 0.019024498 | no |
| C6orf57     | -0.155476833 | -2.828658654 | 0.004966457 | 0.01906307  | no |
| PGBD4       | -0.155466922 | -2.828473874 | 0.004969254 | 0.019070401 | no |
| FLJ45445    | 0.155459514  | 2.828335759  | 0.004971346 | 0.019075023 | no |
| ZNF169      | -0.155433567 | -2.827851996 | 0.00497868  | 0.019097582 | no |
| BCDIN3D-AS1 | -0.155432424 | -2.827830692 | 0.004979003 | 0.019097582 | no |
| USP51       | -0.155418662 | -2.82757412  | 0.004982897 | 0.019109106 | no |
| KIAA1522    | 0.15540302   | 2.827282492  | 0.004987326 | 0.019122679 | no |
| SCN2B       | -0.155382349 | -2.826897125 | 0.004993184 | 0.019141726 | no |
| DNM1P41     | -0.155377854 | -2.826813308 | 0.004994459 | 0.019143199 | no |
| SGSM2       | -0.155344381 | -2.82618928  | 0.00500396  | 0.019176197 | no |
| YIPF2       | 0.155327293  | 2.825870705  | 0.005008817 | 0.019189951 | no |

|              |              |              |             |             |    |
|--------------|--------------|--------------|-------------|-------------|----|
| EMX20S       | -0.155325472 | -2.825836749 | 0.005009335 | 0.019189951 | no |
| RIN1         | 0.155300348  | 2.825368377  | 0.005016485 | 0.019213914 | no |
| FAM3D        | 0.155282633  | 2.825038119  | 0.005021531 | 0.019226903 | no |
| E2F7         | 0.155282163  | 2.82502936   | 0.005021665 | 0.019226903 | no |
| HTATSF1P2    | 0.155233514  | 2.824122447  | 0.005035548 | 0.019273602 | no |
| DOT1L        | -0.155233137 | -2.824115409 | 0.005035656 | 0.019273602 | no |
| LOC284950    | -0.155207215 | -2.823632178 | 0.005043067 | 0.019298532 | no |
| LRG1         | 0.155200368  | 2.823504533  | 0.005045027 | 0.019302593 | no |
| LOC100506963 | 0.155189615  | 2.823304091  | 0.005048105 | 0.019310933 | no |
| BCKDHA       | -0.155183564 | -2.823191297 | 0.005049838 | 0.019314124 | no |
| C4orf52      | 0.155175054  | 2.823032644  | 0.005052276 | 0.019318713 | no |
| GLIS3        | 0.155173102  | 2.822996267  | 0.005052835 | 0.019318713 | no |
| CANT1        | 0.155159144  | 2.822736056  | 0.005056837 | 0.019330575 | no |
| CNTD1        | -0.155151989 | -2.822602688 | 0.00505889  | 0.019334981 | no |
| EGLN1        | -0.155121681 | -2.822037703 | 0.005067592 | 0.019364799 | no |
| NRARP        | -0.155101165 | -2.821655269 | 0.005073491 | 0.019383892 | no |
| YWHAQ        | -0.155075674 | -2.821180104 | 0.005080828 | 0.019408475 | no |
| AMER1        | -0.155064339 | -2.820968825 | 0.005084094 | 0.019417498 | no |
| NLGN3        | -0.155036577 | -2.820451317 | 0.005092101 | 0.019444623 | no |
| TSHZ3        | 0.155017434  | 2.820094486  | 0.005097628 | 0.019462272 | no |
| RNF38        | -0.155005671 | -2.819875228 | 0.005101027 | 0.019470281 | no |
| KIAA1598     | -0.155003904 | -2.819842303 | 0.005101538 | 0.019470281 | no |
| NKTR         | -0.154999072 | -2.819752234 | 0.005102935 | 0.019472155 | no |
| UPF2         | -0.154980237 | -2.819401145 | 0.005108384 | 0.019489487 | no |
| LOXL1-AS1    | 0.154961485  | 2.819051611  | 0.005113814 | 0.019506742 | no |
| NPTX1        | -0.15495569  | -2.818943594 | 0.005115493 | 0.019509684 | no |
| RNF5         | -0.154949586 | -2.818829831 | 0.005117262 | 0.019512968 | no |
| CD82         | 0.154944714  | 2.818739018  | 0.005118675 | 0.019514881 | no |
| CHD2         | -0.154941592 | -2.818680824 | 0.00511958  | 0.019514881 | no |
| XCR1         | 0.154935797  | 2.818572801  | 0.005121261 | 0.019517827 | no |
| GAD2         | -0.154923037 | -2.81833498  | 0.005124964 | 0.019528475 | no |
| SLC6A17      | -0.15491984  | -2.818275383 | 0.005125892 | 0.019528549 | no |
| RBM25        | -0.154897301 | -2.81785527  | 0.00513244  | 0.019550028 | no |
| MRPL28       | -0.15486277  | -2.817211655 | 0.005142485 | 0.019584822 | no |
| NFIB         | -0.154827625 | -2.81655661  | 0.005152728 | 0.019620353 | no |
| RNF215       | -0.154823771 | -2.816484779 | 0.005153852 | 0.019621157 | no |
| LOC400927    | -0.154810547 | -2.816238306 | 0.005157711 | 0.019632373 | no |
| CPA4         | 0.154803048  | 2.816098538  | 0.005159901 | 0.01963723  | no |
| EGFEM1P      | -0.15476173  | -2.815328447 | 0.005171981 | 0.019679719 | no |
| PCSK1N       | -0.154702143 | -2.814217892 | 0.005189447 | 0.019742683 | no |
| EIF2S2       | 0.154686884  | 2.813933522  | 0.005193928 | 0.019756233 | no |
| IGFBP6       | 0.154652364  | 2.813290169  | 0.005204079 | 0.019791341 | no |
| TPTE2P6      | -0.154610657 | -2.812512883 | 0.005216367 | 0.019834562 | no |
| RAD52        | -0.15459369  | -2.812196679 | 0.005221373 | 0.019850086 | no |
| VPS51        | -0.154574657 | -2.81184198  | 0.005226994 | 0.019867941 | no |
| KCNT1        | -0.154554241 | -2.81146152  | 0.00523303  | 0.019887364 | no |
| COX6C        | -0.154539902 | -2.811194297 | 0.005237272 | 0.019899969 | no |
| SAMD8        | -0.154535533 | -2.811112878 | 0.005238566 | 0.019901364 | no |
| RALYL        | -0.154514458 | -2.810720117 | 0.005244809 | 0.01992156  | no |
| LOC339894    | 0.154471973  | 2.809928398  | 0.005257414 | 0.01996591  | no |
| VPS26B       | -0.154459338 | -2.809692937 | 0.005261168 | 0.019973445 | no |



|              |              |              |             |             |    |
|--------------|--------------|--------------|-------------|-------------|----|
| UTP23        | -0.154459039 | -2.809687373 | 0.005261257 | 0.019973445 | no |
| RNF103       | -0.154439891 | -2.809330543 | 0.005266951 | 0.01999153  | no |
| PNKP         | 0.15442891   | 2.809125915  | 0.005270219 | 0.020000401 | no |
| CDKN2AIPNL   | -0.154412164 | -2.808813867 | 0.005275205 | 0.020012453 | no |
| NLK          | -0.154411992 | -2.808810653 | 0.005275257 | 0.020012453 | no |
| ZYX          | 0.154393645  | 2.808468775  | 0.005280725 | 0.020029662 | no |
| RIMKLB       | -0.154375506 | -2.808130755 | 0.005286137 | 0.020046651 | no |
| RBM26-AS1    | -0.154351925 | -2.807691346 | 0.00529318  | 0.020069817 | no |
| LOC100130673 | -0.154331656 | -2.807313652 | 0.00529924  | 0.020088339 | no |
| ELAVL4       | -0.154329335 | -2.807270411 | 0.005299934 | 0.020088339 | no |
| SYNPO2L      | -0.154323871 | -2.807168584 | 0.005301569 | 0.020090993 | no |
| CCDC177      | -0.154297984 | -2.806686222 | 0.005309321 | 0.020116823 | no |
| NAA35        | -0.154285087 | -2.806445897 | 0.005313187 | 0.020127922 | no |
| SCD          | -0.154280585 | -2.806362015 | 0.005314537 | 0.02012856  | no |
| COQ10A       | -0.15427828  | -2.806319058 | 0.005315229 | 0.02012856  | no |
| CLCA2        | 0.154260394  | 2.805985784  | 0.005320596 | 0.020145336 | no |
| AGPAT4-IT1   | -0.154216225 | -2.805162771 | 0.005333872 | 0.020192044 | no |
| CNTNAP3B     | 0.154209809  | 2.805043232  | 0.005335802 | 0.020195796 | no |
| CALY         | -0.154201432 | -2.804887134 | 0.005338324 | 0.020201784 | no |
| CCSER1       | -0.154197958 | -2.804822405 | 0.005339371 | 0.020202186 | no |
| B4GALT7      | 0.154180853  | 2.804503691  | 0.005344525 | 0.020218127 | no |
| HSD52        | 0.154148955  | 2.803909357  | 0.005354148 | 0.020248778 | no |
| PRDX4        | 0.15414775   | 2.803886908  | 0.005354511 | 0.020248778 | no |
| PFDN2        | -0.154136795 | -2.803682788 | 0.00535782  | 0.020257726 | no |
| DARS         | -0.154129053 | -2.803538536 | 0.00536016  | 0.020263006 | no |
| CDAN1        | -0.154120118 | -2.803372061 | 0.005362861 | 0.020269651 | no |
| UPK2         | -0.154087397 | -2.802762401 | 0.005372763 | 0.020303507 | no |
| CDH9         | -0.154057053 | -2.802197038 | 0.00538196  | 0.020334688 | no |
| TSC22D3      | 0.154049229  | 2.802051266  | 0.005384334 | 0.020340081 | no |
| MTL5         | 0.15403534   | 2.801792492  | 0.00538855  | 0.020352431 | no |
| ARPC4        | 0.153940571  | 2.800026863  | 0.005417398 | 0.020457793 | no |
| SNCG         | -0.153920274 | -2.799648713 | 0.005423594 | 0.020474851 | no |
| LOC646214    | -0.153919534 | -2.799634933 | 0.00542382  | 0.020474851 | no |
| EPHB4        | 0.153916412  | 2.799576778  | 0.005424774 | 0.020474854 | no |
| GPS1         | -0.153891265 | -2.799108273 | 0.005432462 | 0.020500269 | no |
| FAM66D       | -0.153876215 | -2.798827894 | 0.005437067 | 0.020514046 | no |
| SRF          | 0.153870455  | 2.798720592  | 0.00543883  | 0.020517098 | no |
| APCDD1       | -0.15386331  | -2.798587482 | 0.005441019 | 0.020520174 | no |
| ATP6VOE2     | -0.153861558 | -2.798554839 | 0.005441556 | 0.020520174 | no |
| DGKG         | -0.153839701 | -2.798147657 | 0.005448255 | 0.020540514 | no |
| ADCY1        | -0.153837726 | -2.798110861 | 0.005448861 | 0.020540514 | no |
| TIMM17B      | -0.153824138 | -2.797857723 | 0.00545303  | 0.020552625 | no |
| ARID2        | -0.153814463 | -2.797677469 | 0.005456001 | 0.020560216 | no |
| CAMKK1       | -0.153795655 | -2.797327091 | 0.005461779 | 0.020578382 | no |
| SULT4A1      | -0.153786    | -2.797147224 | 0.005464747 | 0.020585957 | no |
| SEMA3D       | -0.153765043 | -2.796756831 | 0.005471195 | 0.020603705 | no |
| HDAC11       | -0.153764457 | -2.796745898 | 0.005471376 | 0.020603705 | no |
| DNAJC5G      | -0.153752125 | -2.796516173 | 0.005475174 | 0.020614394 | no |
| NQO2         | 0.153745525  | 2.796393216  | 0.005477207 | 0.020618438 | no |
| GALR3        | -0.153706653 | -2.795669089 | 0.005489198 | 0.020659956 | no |
| EMC2         | -0.15369034  | -2.795365201 | 0.005494237 | 0.020669803 | no |

|           |              |              |             |             |    |
|-----------|--------------|--------------|-------------|-------------|----|
| SDC4P     | 0.153690231  | 2.795363175  | 0.00549427  | 0.020669803 | no |
| FSTL4     | -0.153688842 | -2.795337305 | 0.005494699 | 0.020669803 | no |
| MYO9B     | 0.153646556  | 2.794549603  | 0.005507781 | 0.020715389 | no |
| CTAGE5    | 0.153619755  | 2.794050352  | 0.005516088 | 0.020742999 | no |
| FNDC1     | 0.153579804  | 2.793306156  | 0.00552849  | 0.020786    | no |
| ARHGAP44  | -0.153569238 | -2.793109338 | 0.005531774 | 0.02079471  | no |
| ACTN2     | -0.153564084 | -2.793013348 | 0.005533376 | 0.020797096 | no |
| SASH1     | -0.153558252 | -2.792904708 | 0.005535191 | 0.020800276 | no |
| FKBP11    | 0.153554911  | 2.792842466  | 0.00553623  | 0.020800546 | no |
| HIPK2     | -0.153540454 | -2.79257319  | 0.00554073  | 0.020813812 | no |
| CECR1     | 0.153519014  | 2.792173817  | 0.005547409 | 0.020835262 | no |
| PEX11G    | 0.153489346  | 2.791621214  | 0.005556663 | 0.020863267 | no |
| SEC62     | -0.153488886 | -2.791612641 | 0.005556807 | 0.020863267 | no |
| PSD       | -0.153402605 | -2.79000556  | 0.005583801 | 0.020960954 | no |
| LOC143666 | -0.153398019 | -2.789920138 | 0.005585239 | 0.020962691 | no |
| USP32     | -0.153371405 | -2.789424428 | 0.005593591 | 0.020990373 | no |
| MPG       | 0.153353106  | 2.7890836    | 0.00559934  | 0.021008279 | no |
| PRMT6     | 0.15332375   | 2.788536844  | 0.005608574 | 0.021039251 | no |
| COL4A6    | 0.153297883  | 2.788055081  | 0.005616722 | 0.021066138 | no |
| LETMD1    | -0.15329362  | -2.787975674 | 0.005618066 | 0.021067502 | no |
| TSPAN32   | 0.153290118  | 2.787910454  | 0.00561917  | 0.021067966 | no |
| LOC619207 | -0.153262554 | -2.787397089 | 0.005627867 | 0.021096895 | no |
| YY1AP1    | -0.153231169 | -2.786812556 | 0.005637786 | 0.021130389 | no |
| OLFM4     | -0.15322587  | -2.786713856 | 0.005639462 | 0.021132986 | no |
| ZMYND19   | -0.153195672 | -2.786151451 | 0.005649022 | 0.021161494 | no |
| TTC7B     | -0.153195619 | -2.786150465 | 0.005649039 | 0.021161494 | no |
| SIGLEC8   | 0.153189268  | 2.786032191  | 0.005651051 | 0.021165343 | no |
| FAM111A   | 0.153184869  | 2.785950262  | 0.005652445 | 0.021166877 | no |
| TDH       | -0.153180104 | -2.785861508 | 0.005653956 | 0.021168846 | no |
| KCNC2     | -0.153139463 | -2.785104641 | 0.005666855 | 0.021213445 | no |
| NIPAL1    | 0.153128672  | 2.784903674  | 0.005670285 | 0.021222587 | no |
| PODXL     | 0.153113599  | 2.784622962  | 0.005675078 | 0.021236829 | no |
| FAM153C   | -0.153092639 | -2.784232618 | 0.00568175  | 0.021258094 | no |
| ADAMTS4   | 0.153061934  | 2.783660805  | 0.005691536 | 0.021291002 | no |
| ONECUT2   | -0.153056243 | -2.783554812 | 0.005693352 | 0.021294088 | no |
| BCL11A    | -0.153036488 | -2.783186925 | 0.005699658 | 0.021313964 | no |
| HOXA1     | 0.152933066  | 2.781260996  | 0.005732774 | 0.021434073 | no |
| ANKRD24   | -0.152910785 | -2.780846079 | 0.005739931 | 0.0214571   | no |
| CKAP5     | -0.152889285 | -2.780445719 | 0.005746845 | 0.021479209 | no |
| SNORD89   | 0.15287072   | 2.780100015  | 0.005752821 | 0.021497806 | no |
| SERF2     | 0.15283328   | 2.779402855  | 0.00576489  | 0.02153916  | no |
| MLXIP     | 0.152809487  | 2.778959809  | 0.005772572 | 0.021564112 | no |
| ELOVL1    | 0.15277335   | 2.778286917  | 0.005784256 | 0.021604005 | no |
| PRPF3     | -0.15273972  | -2.777660727 | 0.005795148 | 0.021640927 | no |
| HS3ST1    | 0.152731506  | 2.777507779  | 0.005797812 | 0.021647112 | no |
| CXCL14    | 0.15272075   | 2.777307504  | 0.005801301 | 0.021656377 | no |
| SIM2      | -0.152630539 | -2.775627838 | 0.005830639 | 0.021762116 | no |
| OPTN      | 0.152614721  | 2.775333313  | 0.005835797 | 0.021776371 | no |
| ARNT      | 0.152612613  | 2.775294065  | 0.005836485 | 0.021776371 | no |
| FLJ38576  | -0.1525984   | -2.775029435 | 0.005841123 | 0.021787449 | no |
| ADAM32    | 0.152597303  | 2.775009014  | 0.005841482 | 0.021787449 | no |

|              |              |              |             |             |    |
|--------------|--------------|--------------|-------------|-------------|----|
| IGSF11-AS1   | -0.152584755 | -2.774775393 | 0.00584558  | 0.02179895  | no |
| LOC731275    | -0.15257558  | -2.774604556 | 0.005848578 | 0.021806348 | no |
| NOX4         | 0.152555807  | 2.77423643   | 0.005855044 | 0.021826669 | no |
| MIMT1        | -0.15254247  | -2.773988116 | 0.005859409 | 0.021839153 | no |
| SERTAD1      | 0.152535708  | 2.773862218  | 0.005861623 | 0.021843617 | no |
| C1orf35      | -0.152502463 | -2.77324326  | 0.00587252  | 0.021880432 | no |
| ATOH7        | -0.152411629 | -2.771552157 | 0.005902386 | 0.021987361 | no |
| SMCR8        | 0.152408963  | 2.771502515  | 0.005903265 | 0.021987361 | no |
| IFNA22P      | 0.152398065  | 2.771299638  | 0.005906858 | 0.02199693  | no |
| CORO1C       | -0.152375768 | -2.770884527 | 0.005914215 | 0.022020513 | no |
| LGALS12      | 0.152368002  | 2.770739945  | 0.00591678  | 0.022026245 | no |
| H2BFXP       | -0.15236441  | -2.770673082 | 0.005917966 | 0.022026845 | no |
| EHBP1        | -0.152331827 | -2.770066505 | 0.005928738 | 0.022063117 | no |
| RET          | -0.152297112 | -2.769420238 | 0.005940234 | 0.022102072 | no |
| MRPS15       | 0.152287924  | 2.769249185  | 0.00594328  | 0.022109578 | no |
| MAGED2       | -0.152273393 | -2.768978673 | 0.0059481   | 0.02212368  | no |
| TEN1-CDK3    | -0.152231527 | -2.76819932  | 0.005962007 | 0.02217157  | no |
| SUMO1P1      | 0.152205288  | 2.76771086   | 0.005970739 | 0.022200198 | no |
| CCDC18       | 0.152187172  | 2.767373626  | 0.005976774 | 0.022218792 | no |
| RBCK1        | 0.152178214  | 2.767206879  | 0.00597976  | 0.022226048 | no |
| MAP1A        | -0.152151231 | -2.766704584 | 0.005988762 | 0.022255662 | no |
| ATHL1        | 0.15214073   | 2.766509125  | 0.005992269 | 0.022264844 | no |
| BRF1         | -0.15210031  | -2.765756706 | 0.006005785 | 0.022311207 | no |
| PDK2         | -0.152085964 | -2.765489666 | 0.006010589 | 0.022325193 | no |
| LOC100506668 | 0.15206391   | 2.765079149  | 0.00601798  | 0.022348784 | no |
| GRWD1        | 0.152026125  | 2.764375829  | 0.006030663 | 0.022392013 | no |
| LOC100507600 | 0.151993428  | 2.76376722   | 0.006041657 | 0.022428959 | no |
| CHMP1B       | 0.151972221  | 2.763372491  | 0.006048797 | 0.022451588 | no |
| FNDC5        | -0.151964559 | -2.763229878 | 0.006051378 | 0.022457291 | no |
| FLJ46257     | -0.151960573 | -2.763155679 | 0.006052722 | 0.022458399 | no |
| LINC00568    | -0.151952658 | -2.76300836  | 0.00605539  | 0.022464421 | no |
| ENOX1        | -0.151938019 | -2.762735883 | 0.006060328 | 0.022478861 | no |
| DKKL1        | 0.151911342  | 2.762239335  | 0.006069337 | 0.022508389 | no |
| RNMT         | -0.151907718 | -2.7621719   | 0.006070561 | 0.022509046 | no |
| PDCD11       | -0.151904231 | -2.762106992 | 0.00607174  | 0.022509532 | no |
| FAM178A      | -0.151843627 | -2.760979004 | 0.006092256 | 0.022581696 | no |
| PQLC2        | 0.15183361   | 2.760792558  | 0.006095653 | 0.022587109 | no |
| C9orf37      | -0.151833123 | -2.760783499 | 0.006095818 | 0.022587109 | no |
| CPLX3        | -0.151821779 | -2.760572357 | 0.006099668 | 0.022597475 | no |
| EIF1B        | -0.15177301  | -2.75966469  | 0.00611624  | 0.022654967 | no |
| LOC100129917 | -0.15176519  | -2.75951915  | 0.006118901 | 0.022657156 | no |
| GCSAML-AS1   | 0.151765078  | 2.759517055  | 0.00611894  | 0.022657156 | no |
| CPSF3L       | -0.151753761 | -2.75930643  | 0.006122793 | 0.022667517 | no |
| USE1         | -0.151739597 | -2.759042816 | 0.006127618 | 0.022681475 | no |
| RPL22        | -0.151732913 | -2.758918421 | 0.006129897 | 0.022686001 | no |
| UFSP1        | 0.151623892  | 2.75688947   | 0.006167165 | 0.022819996 | no |
| PDE9A        | -0.151617216 | -2.756765217 | 0.006169454 | 0.022821335 | no |
| PYG01        | -0.151616642 | -2.756754548 | 0.00616965  | 0.022821335 | no |
| PER3         | -0.151604469 | -2.756527998 | 0.006173826 | 0.02283285  | no |
| NUP155       | -0.15159643  | -2.756378392 | 0.006176585 | 0.022839123 | no |
| LANCL3       | 0.151590351  | 2.756265255  | 0.006178672 | 0.022842909 | no |

|           |              |              |             |             |    |
|-----------|--------------|--------------|-------------|-------------|----|
| FTSJ2     | 0.151580379  | 2.756079679  | 0.006182096 | 0.02285164  | no |
| LOC729987 | 0.151576626  | 2.756009848  | 0.006183385 | 0.022852474 | no |
| CACNG3    | -0.151555496 | -2.755616619 | 0.006190649 | 0.022875386 | no |
| ZNF76     | -0.151548206 | -2.755480948 | 0.006193157 | 0.022880719 | no |
| OR2L13    | -0.151541952 | -2.755364571 | 0.006195309 | 0.022883958 | no |
| C2CD2     | 0.15153947   | 2.755318385  | 0.006196163 | 0.022883958 | no |
| SRPK1     | -0.151524173 | -2.755033701 | 0.006201431 | 0.022899478 | no |
| PTGDR2    | -0.151507887 | -2.754730636 | 0.006207044 | 0.022914947 | no |
| FMNL2     | -0.15150583  | -2.75469235  | 0.006207753 | 0.022914947 | no |
| DCUN1D3   | 0.151493137  | 2.754456154  | 0.006212131 | 0.022924645 | no |
| BCL2L12   | 0.151492027  | 2.7544355    | 0.006212514 | 0.022924645 | no |
| KCNK17    | 0.151477723  | 2.754169306  | 0.006217451 | 0.022938925 | no |
| EGF       | 0.15147121   | 2.754048109  | 0.0062197   | 0.022943284 | no |
| UBE2R2    | -0.151462902 | -2.75389351  | 0.00622257  | 0.022949932 | no |
| ANKRD55   | -0.151449171 | -2.75363799  | 0.006227316 | 0.022963496 | no |
| LUC7L3    | -0.151435619 | -2.753385805 | 0.006232004 | 0.022976839 | no |
| SLC12A3   | 0.151431542  | 2.753309941  | 0.006233415 | 0.022978098 | no |
| ANAPC11   | -0.151375864 | -2.752273854 | 0.00625271  | 0.023045274 | no |
| 38412     | -0.151362364 | -2.752022657 | 0.006257396 | 0.023058592 | no |
| N4BP2L2   | -0.151306892 | -2.750990439 | 0.006276687 | 0.023123436 | no |
| WNT7B     | -0.151305575 | -2.750965944 | 0.006277145 | 0.023123436 | no |
| CCDC152   | 0.151285661  | 2.750595396  | 0.006284084 | 0.023145028 | no |
| NEUROD2   | -0.151269392 | -2.750292671 | 0.006289757 | 0.023161956 | no |
| ZNF43     | -0.151249625 | -2.749924868 | 0.006296657 | 0.023183391 | no |
| GPR45     | -0.151243544 | -2.749811717 | 0.006298781 | 0.023187238 | no |
| PRCP      | 0.151236945  | 2.749688924  | 0.006301086 | 0.023191753 | no |
| GDF3      | 0.151219706  | 2.749368163  | 0.006307113 | 0.023209959 | no |
| TMEM132D  | -0.151173561 | -2.748509551 | 0.00632327  | 0.023265434 | no |
| DLL4      | 0.151169126  | 2.748427038  | 0.006324825 | 0.023267171 | no |
| PTPN14    | 0.151165368  | 2.748357114  | 0.006326143 | 0.023268036 | no |
| DPH1      | -0.151132645 | -2.747748274 | 0.006337627 | 0.023306288 | no |
| MSRB1     | 0.151123481  | 2.747577772  | 0.006340847 | 0.023314138 | no |
| DDX46     | -0.151112515 | -2.747373735 | 0.006344702 | 0.023323609 | no |
| EIF3H     | -0.151109979 | -2.747326555 | 0.006345593 | 0.023323609 | no |
| MEF2A     | 0.15109311   | 2.747012688  | 0.006351528 | 0.02334143  | no |
| MYLK      | 0.151075262  | 2.746680622  | 0.006357812 | 0.023360529 | no |
| LIG3      | -0.151028106 | -2.745803269 | 0.006374442 | 0.023417631 | no |
| LIF       | 0.151007672  | 2.745423096  | 0.006381661 | 0.023440142 | no |
| DNTTIP2   | 0.150966466  | 2.744656461  | 0.00639624  | 0.023489676 | no |
| AIRN      | -0.15094921  | -2.744335414 | 0.006402354 | 0.023508113 | no |
| USP30     | -0.150937811 | -2.744123357 | 0.006406395 | 0.023518934 | no |
| MTHFS     | 0.150933595  | 2.744044919  | 0.006407891 | 0.023520406 | no |
| KCNJ4     | -0.150917171 | -2.74373935  | 0.006413719 | 0.023537781 | no |
| CHD8      | -0.150888064 | -2.743197847 | 0.006424061 | 0.023571707 | no |
| NCKAP1    | -0.150876608 | -2.742984727 | 0.006428135 | 0.02358263  | no |
| LACC1     | 0.150845238  | 2.742401126  | 0.006439303 | 0.023619571 | no |
| FOS       | 0.150833203  | 2.742177232  | 0.006443592 | 0.023631271 | no |
| PSMD3     | -0.150823379 | -2.74199447  | 0.006447096 | 0.023640084 | no |
| P4HA2     | 0.150806069  | 2.741672445  | 0.006453273 | 0.023658697 | no |
| LEMD3     | -0.150796073 | -2.741486485 | 0.006456842 | 0.023667745 | no |
| KIF13A    | -0.150740873 | -2.740459616 | 0.006476584 | 0.023736063 | no |

|            |              |              |             |             |    |
|------------|--------------|--------------|-------------|-------------|----|
| FZD5       | 0.15071424   | 2.739964165  | 0.006486129 | 0.023766991 | no |
| CDH8       | -0.150700934 | -2.739716646 | 0.006490902 | 0.023780427 | no |
| CADPS2     | 0.150692781  | 2.739564986  | 0.006493829 | 0.023787092 | no |
| ST6GALNAC4 | 0.150675976  | 2.739252384  | 0.006499864 | 0.023803686 | no |
| ECE2       | 0.150674001  | 2.73921563   | 0.006500574 | 0.023803686 | no |
| ATP11B     | 0.150632977  | 2.738452517  | 0.00651533  | 0.023853654 | no |
| HERC2P7    | -0.150554201 | -2.736987164 | 0.006543749 | 0.023950913 | no |
| EVC2       | 0.150553165  | 2.736967903  | 0.006544124 | 0.023950913 | no |
| CDK8       | -0.150525546 | -2.736454161 | 0.006554114 | 0.023983394 | no |
| NDUFS4     | -0.150483487 | -2.735671833 | 0.006569355 | 0.024035071 | no |
| LSS        | -0.150460356 | -2.735241586 | 0.00657775  | 0.02406169  | no |
| LOC441454  | -0.150452686 | -2.735098941 | 0.006580536 | 0.024063967 | no |
| SLFN13     | 0.150452476  | 2.735095019  | 0.006580612 | 0.024063967 | no |
| EAF1       | 0.150415716  | 2.734411286  | 0.006593979 | 0.024107396 | no |
| C9orf172   | -0.150413647 | -2.734372799 | 0.006594732 | 0.024107396 | no |
| C2orf69    | -0.150389435 | -2.733922464 | 0.00660355  | 0.024135526 | no |
| SCMH1      | 0.150381769  | 2.733779879  | 0.006606344 | 0.024141632 | no |
| CXXC1      | -0.1503717   | -2.733592601 | 0.006610016 | 0.024150943 | no |
| CGRRF1     | -0.150365486 | -2.733477033 | 0.006612282 | 0.024153579 | no |
| ZNF883     | -0.150363561 | -2.733441223 | 0.006612985 | 0.024153579 | no |
| USP16      | -0.150355688 | -2.733294802 | 0.006615858 | 0.024159967 | no |
| C11orf49   | -0.150340345 | -2.733009418 | 0.006621461 | 0.02417632  | no |
| UPRT       | 0.15032963   | 2.73281013   | 0.006625376 | 0.024186506 | no |
| CIAPIN1    | -0.150315057 | -2.732539087 | 0.006630705 | 0.024201847 | no |
| RS1        | -0.150282173 | -2.731927492 | 0.006642742 | 0.024241665 | no |
| CCDC28B    | -0.150264852 | -2.731605343 | 0.00664909  | 0.024260713 | no |
| FLOT2      | 0.150247252  | 2.731278005  | 0.006655547 | 0.024280148 | no |
| CCBE1      | -0.150236613 | -2.731080143 | 0.006659452 | 0.024290272 | no |
| OPCML      | -0.150228447 | -2.730928272 | 0.006662451 | 0.024297087 | no |
| IGSF21     | -0.150175423 | -2.72994212  | 0.006681954 | 0.024364077 | no |
| ANKRD20A9P | -0.150169354 | -2.72982926  | 0.006684189 | 0.024368093 | no |
| JAKMIP2    | 0.150164456  | 2.729738157  | 0.006685994 | 0.024370539 | no |
| TUBA8      | -0.15013169  | -2.729128802 | 0.006698077 | 0.024404937 | no |
| ANO3       | -0.150125976 | -2.729022525 | 0.006700187 | 0.024404937 | no |
| UBXN4      | 0.150125244  | 2.72900892   | 0.006700457 | 0.024404937 | no |
| ITPKA      | -0.150123312 | -2.728972994 | 0.00670117  | 0.024404937 | no |
| CERS2      | 0.150121441  | 2.728938191  | 0.006701861 | 0.024404937 | no |
| CAPN5      | 0.150117484  | 2.728864595  | 0.006703323 | 0.024404937 | no |
| CXCL1      | 0.150117328  | 2.728861705  | 0.00670338  | 0.024404937 | no |
| CYP1A1     | -0.150099625 | -2.728532466 | 0.006709922 | 0.024424127 | no |
| C20orf112  | -0.150096913 | -2.728482046 | 0.006710924 | 0.024424127 | no |
| BZW1       | 0.150089095  | 2.728336643  | 0.006713815 | 0.024430513 | no |
| ZNF729     | -0.150073834 | -2.72805284  | 0.006719462 | 0.02444692  | no |
| AP5Z1      | 0.150046258  | 2.727540007  | 0.006729676 | 0.024479937 | no |
| LCA5L      | 0.150041645  | 2.72745423   | 0.006731386 | 0.024482012 | no |
| MDC1       | -0.150011123 | -2.726886626 | 0.00674271  | 0.024518669 | no |
| TBL2       | 0.150008331  | 2.726834702  | 0.006743746 | 0.024518669 | no |
| RXRβ       | -0.150003188 | -2.726739058 | 0.006745656 | 0.024518808 | no |
| ZNF513     | -0.150002084 | -2.726718533 | 0.006746066 | 0.024518808 | no |
| TCEB1      | -0.14999668  | -2.726618037 | 0.006748074 | 0.024521958 | no |
| PRMT3      | -0.149929219 | -2.725363529 | 0.006773181 | 0.024609034 | no |

|              |              |              |             |             |    |
|--------------|--------------|--------------|-------------|-------------|----|
| TSPAN11      | -0.149914967 | -2.725098517 | 0.006778496 | 0.02462418  | no |
| LNPEP        | -0.149879883 | -2.724446116 | 0.006791595 | 0.024667596 | no |
| RNF139       | -0.149847163 | -2.723837686 | 0.006803832 | 0.024707866 | no |
| LOC100507391 | 0.149822318  | 2.723375687  | 0.006813137 | 0.024737478 | no |
| RIMBP2       | -0.14981503  | -2.723240169 | 0.006815869 | 0.024743216 | no |
| RPS29        | -0.149802951 | -2.723015558 | 0.006820399 | 0.024755478 | no |
| ANGPT4       | -0.149793465 | -2.722839183 | 0.006823957 | 0.024764213 | no |
| C9orf89      | 0.149790229  | 2.722778998  | 0.006825172 | 0.02476444  | no |
| BEND3        | -0.149772136 | -2.722442577 | 0.006831966 | 0.02478407  | no |
| TVP23B       | 0.14976968   | 2.722396914  | 0.006832889 | 0.02478407  | no |
| ERC2         | -0.149684167 | -2.720806877 | 0.006865086 | 0.024893545 | no |
| SLM01        | -0.149683368 | -2.720792031 | 0.006865387 | 0.024893545 | no |
| SLC52A2      | 0.149664612  | 2.720443288  | 0.006872468 | 0.024915014 | no |
| FBXL19       | -0.149649342 | -2.720159363 | 0.006878237 | 0.024931724 | no |
| ACD          | -0.149645547 | -2.720088806 | 0.006879671 | 0.024932718 | no |
| GLTPD2       | -0.149642011 | -2.720023062 | 0.006881008 | 0.024933358 | no |
| ACTG2        | 0.149629678  | 2.719793759  | 0.006885672 | 0.024946053 | no |
| LOC100128946 | -0.149620779 | -2.719628298 | 0.00688904  | 0.024954046 | no |
| MBIP         | -0.149611297 | -2.719451995 | 0.00689263  | 0.024962841 | no |
| TSPAN9       | 0.149564464  | 2.718581247  | 0.006910384 | 0.025022924 | no |
| TMEM54       | 0.149556828  | 2.718439267  | 0.006913282 | 0.025029204 | no |
| HAT1         | 0.149511628  | 2.7175989    | 0.006930463 | 0.025087178 | no |
| TET3         | -0.149495517 | -2.717299362 | 0.006936596 | 0.02510515  | no |
| LOC550643    | 0.149459415  | 2.716628157  | 0.006950356 | 0.025150717 | no |
| GGT7         | -0.149436531 | -2.71620271  | 0.006959091 | 0.025178086 | no |
| FAM159B      | -0.149418715 | -2.715871479 | 0.006965899 | 0.025198473 | no |
| FATE1        | 0.149414133  | 2.715786301  | 0.00696765  | 0.025200568 | no |
| ASB6         | 0.149403849  | 2.715595104  | 0.006971583 | 0.02521055  | no |
| TEX21P       | -0.149387076 | -2.715283269 | 0.006978002 | 0.025229517 | no |
| NLRP3        | 0.149379244  | 2.715137664  | 0.006981002 | 0.025236115 | no |
| FLI1-AS1     | 0.149362658  | 2.714829325  | 0.006987356 | 0.025250663 | no |
| ABCA6        | 0.149362607  | 2.714828382  | 0.006987376 | 0.025250663 | no |
| ZDHHC21      | -0.149332512 | -2.714268879 | 0.00699892  | 0.02528813  | no |
| MIR10B       | 0.149317777  | 2.713994961  | 0.007004579 | 0.025302015 | no |
| FAM229B      | -0.149316374 | -2.713968867 | 0.007005118 | 0.025302015 | no |
| LRCH4        | 0.149282647  | 2.713341874  | 0.007018086 | 0.025339116 | no |
| QKI          | -0.149281316 | -2.713317128 | 0.007018598 | 0.025339116 | no |
| NHP2         | -0.149280461 | -2.713301246 | 0.007018927 | 0.025339116 | no |
| NRF1         | -0.149239631 | -2.712542217 | 0.007034656 | 0.025391636 | no |
| FZD7         | 0.149235225  | 2.712460308  | 0.007036356 | 0.025393504 | no |
| FMR1         | -0.149218883 | -2.712156516 | 0.007042661 | 0.025411994 | no |
| GTF2IP1      | 0.149175031  | 2.711341325  | 0.007059608 | 0.025468864 | no |
| SPRNP1       | -0.149154018 | -2.710950718 | 0.00706774  | 0.025493926 | no |
| NR1H2        | 0.149129328  | 2.710491758  | 0.007077307 | 0.025524151 | no |
| TNFAIP8L3    | 0.149112134  | 2.710172133  | 0.007083977 | 0.025543917 | no |
| DTNA         | 0.149084392  | 2.709656451  | 0.007094749 | 0.025578469 | no |
| THEM6        | -0.149078595 | -2.709548705 | 0.007097002 | 0.025582299 | no |
| OIP5-AS1     | -0.14906044  | -2.709211234 | 0.007104061 | 0.025603452 | no |
| MRVI1        | -0.149054887 | -2.709107999 | 0.007106222 | 0.025605334 | no |
| DNAJB11      | 0.149050116  | 2.709019314  | 0.007108079 | 0.025605334 | no |
| LOC149373    | -0.149049913 | -2.709015546 | 0.007108158 | 0.025605334 | no |

|              |              |              |             |             |    |
|--------------|--------------|--------------|-------------|-------------|----|
| LRP2BP       | -0.149026354 | -2.708577628 | 0.007117333 | 0.025634089 | no |
| GNG2         | -0.148974499 | -2.707613755 | 0.007137566 | 0.025699359 | no |
| ZNF491       | -0.148973778 | -2.707600356 | 0.007137847 | 0.025699359 | no |
| SLC25A5-AS1  | -0.148969516 | -2.707521143 | 0.007139512 | 0.025701048 | no |
| SPOCK3       | -0.148963006 | -2.707400135 | 0.007142057 | 0.025705902 | no |
| NEXN         | 0.148951579  | 2.707187737  | 0.007146525 | 0.025717676 | no |
| LOC553103    | -0.148941583 | -2.707001937 | 0.007150435 | 0.0257262   | no |
| FOXG1        | -0.148939404 | -2.706961446 | 0.007151287 | 0.0257262   | no |
| MMADHC       | 0.148935251  | 2.706884248  | 0.007152913 | 0.025727186 | no |
| PEAR1        | 0.148932587  | 2.706834727  | 0.007153956 | 0.025727186 | no |
| DDX49        | -0.148920645 | -2.706612752 | 0.007158632 | 0.025739697 | no |
| HCN1         | -0.148912741 | -2.706465849 | 0.007161729 | 0.025746522 | no |
| JHDM1D       | -0.148909678 | -2.706408916 | 0.007162929 | 0.025746531 | no |
| MSL3P1       | 0.148897242  | 2.706177773  | 0.007167804 | 0.025759746 | no |
| OTUB2        | -0.148893008 | -2.706099081 | 0.007169465 | 0.025760791 | no |
| BCRP3        | -0.148890388 | -2.706050381 | 0.007170492 | 0.025760791 | no |
| ACAT2        | -0.148878335 | -2.705826343 | 0.007175222 | 0.025773474 | no |
| BMP4         | 0.148862852  | 2.705538581  | 0.007181301 | 0.025791    | no |
| MRO          | -0.148839954 | -2.705112983 | 0.007190301 | 0.025819007 | no |
| TRPC6        | 0.148819809  | 2.704738556  | 0.007198227 | 0.025843149 | no |
| ZNF14        | -0.148736918 | -2.703197965 | 0.007230921 | 0.025956193 | no |
| NEFL         | -0.148713842 | -2.702769079 | 0.007240047 | 0.02598461  | no |
| SLC25A53     | -0.148667501 | -2.701907833 | 0.007258403 | 0.026046142 | no |
| LOC100129858 | -0.148662421 | -2.701813423 | 0.007260418 | 0.026049022 | no |
| COL26A1      | -0.148647103 | -2.70152874  | 0.007266497 | 0.026066479 | no |
| RHBDF1       | 0.148628598  | 2.701184828  | 0.007273846 | 0.026088488 | no |
| PHEX         | 0.148556025  | 2.6998361    | 0.007302732 | 0.026187721 | no |
| C8orf58      | 0.148541029  | 2.699557417  | 0.007308713 | 0.026204798 | no |
| TMX3         | 0.148531548  | 2.69938122   | 0.007312498 | 0.026213993 | no |
| ZNF658       | -0.148499667 | -2.698788759 | 0.007325235 | 0.026255273 | no |
| HAPLN4       | -0.148461467 | -2.698078875 | 0.007340522 | 0.02630568  | no |
| PMP22        | 0.148432972  | 2.697549354  | 0.007351944 | 0.02634222  | no |
| LOC285629    | 0.148409888  | 2.697120378  | 0.00736121  | 0.026371021 | no |
| C22orf24     | -0.1483927   | -2.696800988 | 0.007368115 | 0.026391359 | no |
| SYPL1        | 0.148374126  | 2.696455843  | 0.007375583 | 0.026413707 | no |
| FZD6         | 0.148367305  | 2.696329089  | 0.007378328 | 0.026419133 | no |
| PAQR7        | 0.148343984  | 2.695895725  | 0.007387718 | 0.02644835  | no |
| AP1S2        | 0.14832707   | 2.695581429  | 0.007394535 | 0.026468346 | no |
| CCL26        | 0.148260778  | 2.694349609  | 0.007421307 | 0.026559752 | no |
| JARID2       | -0.148208144 | -2.693371596 | 0.007442625 | 0.026631612 | no |
| PELP1        | -0.148201666 | -2.693251234 | 0.007445253 | 0.026636579 | no |
| KIRREL3      | -0.148189233 | -2.693020219 | 0.007450298 | 0.026650192 | no |
| UBAC1        | -0.148158541 | -2.692449943 | 0.007462766 | 0.026690348 | no |
| FSD1L        | -0.148148863 | -2.692270116 | 0.007466701 | 0.026699979 | no |
| C3orf70      | -0.148139977 | -2.692105006 | 0.007470316 | 0.026708461 | no |
| C2CD4C       | -0.148117773 | -2.691692439 | 0.007479356 | 0.026736333 | no |
| STAC         | 0.148086449  | 2.691110449  | 0.007492124 | 0.026777523 | no |
| CMC1         | 0.148079033  | 2.690972651  | 0.00749515  | 0.026783884 | no |
| EXOSC7       | -0.148072845 | -2.690857682 | 0.007497676 | 0.026788455 | no |
| BBS9         | 0.14806231   | 2.69066195   | 0.007501978 | 0.026799369 | no |
| HENMT1       | 0.14805101   | 2.690451992  | 0.007506594 | 0.026811404 | no |

|          |              |              |             |             |    |
|----------|--------------|--------------|-------------|-------------|----|
| MFSD4    | -0.147953421 | -2.688638863 | 0.007546569 | 0.026949704 | no |
| SYNGR3   | -0.147949582 | -2.688567524 | 0.007548146 | 0.026950856 | no |
| LIX1     | -0.147921203 | -2.68804028  | 0.007559808 | 0.026988014 | no |
| PTGES2   | -0.147895689 | -2.68756628  | 0.007570307 | 0.027021004 | no |
| RNF19A   | 0.147872479  | 2.687135079  | 0.007579869 | 0.027050642 | no |
| ARHGEF2  | -0.147840711 | -2.686544883 | 0.007592974 | 0.027092913 | no |
| FGFRL1   | 0.147827451  | 2.686298544  | 0.007598451 | 0.027107952 | no |
| ZNF300   | -0.14782388  | -2.686232198 | 0.007599926 | 0.027108715 | no |
| FKBP4    | -0.147806088 | -2.685901655 | 0.007607281 | 0.027130447 | no |
| GPX7     | 0.147792936  | 2.685657328  | 0.007612721 | 0.027145345 | no |
| NEUROD1  | -0.147765754 | -2.685152368 | 0.007623977 | 0.027180969 | no |
| CHRD     | -0.147748124 | -2.684824834 | 0.007631285 | 0.027202513 | no |
| LICAM    | -0.147730604 | -2.684499369 | 0.007638554 | 0.027223907 | no |
| SARS2    | -0.147717573 | -2.684257286 | 0.007643964 | 0.027238673 | no |
| MED13L   | -0.147687513 | -2.683698869 | 0.007656458 | 0.02727867  | no |
| C19orf26 | -0.147670675 | -2.683386085 | 0.007663464 | 0.027299106 | no |
| ATRNL1   | -0.147635109 | -2.682725406 | 0.007678281 | 0.027347356 | no |
| KRT222   | -0.147624482 | -2.682527995 | 0.007682714 | 0.027356928 | no |
| APOLD1   | -0.147622563 | -2.68249234  | 0.007683515 | 0.027356928 | no |
| LRRC70   | 0.14761779   | 2.682403669  | 0.007685507 | 0.027359487 | no |
| ZNF626   | -0.147571197 | -2.681538166 | 0.007704973 | 0.027422019 | no |
| SLC25A1  | -0.147567118 | -2.681462396 | 0.00770668  | 0.027422019 | no |
| CEP350   | -0.14756659  | -2.681452598 | 0.0077069   | 0.027422019 | no |
| SAMD14   | -0.147504909 | -2.680306849 | 0.007732745 | 0.027509421 | no |
| LYVE1    | 0.14749222   | 2.68007114   | 0.007738071 | 0.027523814 | no |
| ZNF649   | -0.147471915 | -2.67969398  | 0.007746601 | 0.027549594 | no |
| SOCS6    | 0.147452661  | 2.679336353  | 0.007754697 | 0.027567714 | no |
| SLC39A7  | 0.147452471  | 2.679332814  | 0.007754777 | 0.027567714 | no |
| PPP3CB   | -0.147450647 | -2.679298936 | 0.007755544 | 0.027567714 | no |
| PRKCA    | -0.147422988 | -2.678785184 | 0.007767189 | 0.02760454  | no |
| RPL7     | -0.147403694 | -2.678426805 | 0.007775321 | 0.027628873 | no |
| NPPA-AS1 | 0.147366063  | 2.677727855  | 0.007791204 | 0.027677958 | no |
| CCL3     | 0.147364864  | 2.677705575  | 0.00779171  | 0.027677958 | no |
| RABGGTA  | -0.147347414 | -2.677381464 | 0.007799085 | 0.027699578 | no |
| ULBP3    | 0.147334606  | 2.677143569  | 0.007804503 | 0.027714238 | no |
| C1orf63  | 0.147328801  | 2.677035746  | 0.007806959 | 0.027718381 | no |
| C7orf43  | 0.14730888   | 2.676665749  | 0.007815394 | 0.027743745 | no |
| CNKSR2   | -0.147278578 | -2.676102936 | 0.00782824  | 0.027782318 | no |
| TMEM120A | 0.147277151  | 2.676076432  | 0.007828845 | 0.027782318 | no |
| RAP1B    | 0.14727156   | 2.675972582  | 0.007831218 | 0.027786149 | no |
| KIAA0430 | -0.147267542 | -2.675897969 | 0.007832923 | 0.027787611 | no |
| PPCDC    | 0.147240002  | 2.675386468  | 0.007844621 | 0.027820343 | no |
| MTHFSD   | 0.147239725  | 2.675381315  | 0.007844739 | 0.027820343 | no |
| COX4I1   | -0.147201404 | -2.674669593 | 0.007861041 | 0.027873559 | no |
| CCR8     | 0.147193545  | 2.674523636  | 0.007864389 | 0.027880827 | no |
| UNC13C   | -0.147183107 | -2.674329762 | 0.007868836 | 0.027891995 | no |
| ELOVL5   | 0.147159873  | 2.673898262  | 0.007878744 | 0.027922509 | no |
| ST13     | -0.147151831 | -2.673748912 | 0.007882176 | 0.027930065 | no |
| FEZF2    | -0.147136817 | -2.673470054 | 0.007888587 | 0.027948176 | no |
| DESI2    | 0.14712809   | 2.673307981  | 0.007892316 | 0.027952246 | no |
| ZNF613   | 0.147128039  | 2.673307033  | 0.007892338 | 0.027952246 | no |



|            |              |              |             |             |    |
|------------|--------------|--------------|-------------|-------------|----|
| ISY1       | 0.147119892  | 2.673155736  | 0.00789582  | 0.02795949  | no |
| UBTD1      | 0.147114558  | 2.673056666  | 0.0078981   | 0.02795949  | no |
| FO XK2     | -0.147114124 | -2.673048609 | 0.007898286 | 0.02795949  | no |
| UBXN10     | 0.147105814  | 2.672894279  | 0.00790184  | 0.027967465 | no |
| C1orf200   | 0.147098267  | 2.672754118  | 0.007905069 | 0.027974287 | no |
| SPNS2      | -0.147087177 | -2.67254815  | 0.007909817 | 0.027986479 | no |
| DTD2       | -0.147080129 | -2.67241726  | 0.007912835 | 0.02799255  | no |
| STT3B      | 0.147074215  | 2.672307437  | 0.007915368 | 0.027994354 | no |
| RHOBTB3    | -0.147072857 | -2.672282216 | 0.00791595  | 0.027994354 | no |
| PPBPP2     | -0.147012964 | -2.67116992  | 0.00794165  | 0.02808062  | no |
| HCFC1R1    | -0.146999884 | -2.670927018 | 0.007947273 | 0.028095877 | no |
| ZNF428     | -0.146994973 | -2.670835808 | 0.007949385 | 0.028098722 | no |
| TMEM183A   | -0.146986999 | -2.670687735 | 0.007952815 | 0.028106223 | no |
| SPOCD1     | 0.146948069  | 2.669964779  | 0.00796958  | 0.028158166 | no |
| LARGE      | -0.146946787 | -2.669940974 | 0.007970133 | 0.028158166 | no |
| RALBP1     | 0.146934334  | 2.669709721  | 0.007975503 | 0.028172506 | no |
| ATF7IP2    | 0.146929662  | 2.669622945  | 0.007977519 | 0.028174996 | no |
| WDR7       | -0.14692538  | -2.66954343  | 0.007979366 | 0.028176891 | no |
| MAGEF1     | -0.146918196 | -2.66941003  | 0.007982467 | 0.028183209 | no |
| DDN        | -0.14689577  | -2.668993572 | 0.007992153 | 0.028212773 | no |
| C19orf57   | -0.146868168 | -2.668481008 | 0.008004089 | 0.028250267 | no |
| GOSR2      | 0.146838594  | 2.667931834  | 0.008016896 | 0.028286744 | no |
| RAP1GAP2   | -0.146838223 | -2.667924937 | 0.008017056 | 0.028286744 | no |
| ZNF41      | -0.146829184 | -2.667757085 | 0.008020974 | 0.028295923 | no |
| SLC45A1    | -0.14682528  | -2.66768459  | 0.008022667 | 0.028297249 | no |
| AUP1       | 0.146817258  | 2.66753564   | 0.008026146 | 0.028304874 | no |
| DNER       | -0.146782808 | -2.666895923 | 0.008041103 | 0.028352967 | no |
| RPS27A     | -0.146745082 | -2.666195385 | 0.00805751  | 0.028406159 | no |
| DNAJC7     | -0.14672622  | -2.665845152 | 0.008065724 | 0.028430454 | no |
| DNAJB4     | 0.146719558  | 2.665721437  | 0.008068627 | 0.028432121 | no |
| LRP3       | -0.146719063 | -2.665712244 | 0.008068843 | 0.028432121 | no |
| PRKCG      | -0.146709125 | -2.665527723 | 0.008073175 | 0.028442723 | no |
| ALDH3A2    | 0.146678995  | 2.664968253  | 0.008086323 | 0.028484375 | no |
| ZNF345     | 0.146639676  | 2.66423817   | 0.00810351  | 0.028540237 | no |
| GPATCH8    | -0.14662637  | -2.663991108 | 0.008109333 | 0.028551583 | no |
| NDUFS3     | -0.146626244 | -2.663988769 | 0.008109388 | 0.028551583 | no |
| ICAM2      | 0.146615848  | 2.663795754  | 0.00811394  | 0.028562931 | no |
| ENO2       | -0.146606153 | -2.663615736 | 0.008118188 | 0.028573203 | no |
| WDR24      | -0.146572045 | -2.662982429 | 0.008133147 | 0.028618167 | no |
| PACS2      | -0.146570953 | -2.662962161 | 0.008133626 | 0.028618167 | no |
| FLJ31306   | -0.146537821 | -2.662346992 | 0.008148182 | 0.028664687 | no |
| ARHGAP5    | -0.146534414 | -2.662283735 | 0.00814968  | 0.028665265 | no |
| EMX1       | -0.146517935 | -2.661977761 | 0.008156929 | 0.028686069 | no |
| C16orf52   | -0.146465909 | -2.661011827 | 0.008179853 | 0.028761981 | no |
| GNB4       | 0.146397512  | 2.659741951  | 0.008210079 | 0.028863537 | no |
| DAPK1      | -0.14638695  | -2.659545856 | 0.008214755 | 0.028875254 | no |
| SPON2      | 0.146371755  | 2.659263761  | 0.008221486 | 0.028894189 | no |
| LOC283177  | -0.146364065 | -2.659120984 | 0.008224895 | 0.028896432 | no |
| STXBP5-AS1 | -0.1463629   | -2.659099359 | 0.008225412 | 0.028896432 | no |
| LRCH2      | -0.146361216 | -2.659068089 | 0.008226159 | 0.028896432 | no |
| TMEM104    | 0.146355412  | 2.658960344  | 0.008228732 | 0.028900749 | no |

|              |              |              |             |             |    |
|--------------|--------------|--------------|-------------|-------------|----|
| SHROOM2      | -0.146325378 | -2.658402737 | 0.008242063 | 0.02894284  | no |
| LOC100506713 | -0.146318307 | -2.658271477 | 0.008245204 | 0.028949139 | no |
| TRHDE-AS1    | -0.146309502 | -2.658108003 | 0.008249117 | 0.028958148 | no |
| PKN2         | 0.146292261  | 2.657787916  | 0.008256784 | 0.028980329 | no |
| SLC16A11     | 0.146285593  | 2.657664134  | 0.008259751 | 0.028986008 | no |
| GLIS2        | -0.146281541 | -2.657588903 | 0.008261555 | 0.028987604 | no |
| FAM182B      | -0.146274997 | -2.657467428 | 0.008264468 | 0.028993091 | no |
| IFNLR1       | 0.146265049  | 2.657282734  | 0.008268898 | 0.0290039   | no |
| C1orf198     | -0.146255726 | -2.65710966  | 0.008273052 | 0.029013734 | no |
| RBFOX1       | -0.14623287  | -2.656685354 | 0.008283243 | 0.029044736 | no |
| C10orf55     | 0.146225183  | 2.656542651  | 0.008286674 | 0.029052023 | no |
| DKFZP586I142 | 0.146221056  | 2.656466034  | 0.008288516 | 0.029053742 | no |
| SURF2        | -0.146186083 | -2.655816786 | 0.008304141 | 0.029103765 | no |
| SAFB2        | -0.14617862  | -2.655678238 | 0.008307479 | 0.029110716 | no |
| ARL5A        | 0.146156959  | 2.65527612   | 0.008317173 | 0.029139935 | no |
| LOC100507217 | -0.146124835 | -2.65467978  | 0.008331568 | 0.029185612 | no |
| MPP5         | -0.146112475 | -2.654450335 | 0.008337113 | 0.029191901 | no |
| ATP13A4      | -0.14611074  | -2.654418128 | 0.008337891 | 0.029191901 | no |
| TTYH3        | 0.146110723  | 2.654417814  | 0.008337899 | 0.029191901 | no |
| TMEM100      | -0.146108723 | -2.654380679 | 0.008338797 | 0.029191901 | no |
| LIMD2        | 0.146103287  | 2.654279768  | 0.008341237 | 0.029195687 | no |
| BLOC1S1      | 0.146089873  | 2.654030773  | 0.00834726  | 0.029212013 | no |
| RPS14        | -0.146016173 | -2.652662666 | 0.008380426 | 0.029323306 | no |
| HMBOX1       | -0.146002569 | -2.652410144 | 0.008386561 | 0.029339994 | no |
| LLPH         | 0.145997625  | 2.652318372  | 0.008388792 | 0.029343021 | no |
| RASA4        | -0.145983153 | -2.652049738 | 0.008395324 | 0.02936109  | no |
| VCL          | 0.145951058  | 2.651453983  | 0.008409826 | 0.029406864 | no |
| TNFRSF11A    | 0.145947049  | 2.651379572  | 0.008411639 | 0.029406864 | no |
| PGAM1        | -0.14594361  | -2.651315726 | 0.008413195 | 0.029406864 | no |
| MIR3936      | -0.145942084 | -2.651287402 | 0.008413885 | 0.029406864 | no |
| ADRB1        | -0.145890488 | -2.650329699 | 0.008437256 | 0.029482235 | no |
| TBL3         | -0.145888421 | -2.650291319 | 0.008438194 | 0.029482235 | no |
| ZNF536       | -0.145861398 | -2.649789738 | 0.008450459 | 0.029520287 | no |
| ACTR5        | -0.145856154 | -2.649692406 | 0.00845284  | 0.029523808 | no |
| LOC100131067 | -0.145826787 | -2.649147317 | 0.00846619  | 0.029565632 | no |
| TMEM238      | 0.145810086  | 2.648837318  | 0.008473791 | 0.029587367 | no |
| SNED1        | 0.145785227  | 2.648375924  | 0.008485115 | 0.029622094 | no |
| IRX2         | -0.145743485 | -2.647601158 | 0.008504161 | 0.029683762 | no |
| NANP         | 0.145737893  | 2.647497381  | 0.008506715 | 0.029685887 | no |
| PACSLN1      | -0.145736104 | -2.647464174 | 0.008507532 | 0.029685887 | no |
| PRPSAP1      | -0.145718267 | -2.647133116 | 0.008515685 | 0.029709512 | no |
| EFHC1        | 0.145693903  | 2.646680909  | 0.008526833 | 0.029743572 | no |
| SLC17A6      | -0.145690882 | -2.646624846 | 0.008528216 | 0.029743572 | no |
| FAM90A2P     | 0.145679649  | 2.646416349  | 0.008533361 | 0.029756687 | no |
| LOC151009    | -0.14561077  | -2.645137991 | 0.008564968 | 0.029862057 | no |
| PEX5         | -0.145586502 | -2.644687588 | 0.008576129 | 0.02989612  | no |
| TAOK3        | -0.145577935 | -2.644528598 | 0.008580072 | 0.029903562 | no |
| P2RY2        | 0.145575817  | 2.6444893    | 0.008581046 | 0.029903562 | no |
| DRD5         | -0.14557238  | -2.644425506 | 0.008582629 | 0.029904228 | no |
| ADCY2        | -0.145562918 | -2.644249893 | 0.008586987 | 0.029906161 | no |
| CCDC82       | -0.14555461  | -2.644095715 | 0.008590815 | 0.029906161 | no |

|           |              |              |             |             |    |
|-----------|--------------|--------------|-------------|-------------|----|
| GSTZ1     | -0.14552883  | -2.644063658 | 0.008591611 | 0.029906161 | no |
| LRRC69    | 0.14552281   | 2.64405249   | 0.008591889 | 0.029906161 | no |
| NHSL1     | -0.145550573 | -2.644020783 | 0.008592676 | 0.029906161 | no |
| HS3ST4    | -0.145550093 | -2.644011885 | 0.008592897 | 0.029906161 | no |
| CASP7     | 0.145550033  | 2.644010765  | 0.008592925 | 0.029906161 | no |
| MMP12     | 0.145543071  | 2.643881556  | 0.008596135 | 0.029912489 | no |
| MZT2A     | -0.145535569 | -2.643742334 | 0.008599594 | 0.029919683 | no |
| GINS3     | -0.145507082 | -2.64321366  | 0.008612744 | 0.029960582 | no |
| GOLPH3L   | 0.145483569  | 2.642777297  | 0.008623611 | 0.02999353  | no |
| BABAM1    | -0.145472262 | -2.642567452 | 0.008628841 | 0.030006865 | no |
| MIOS      | 0.145458302  | 2.642308392  | 0.008635302 | 0.030024474 | no |
| SUMO1     | -0.14545207  | -2.642192738 | 0.008638188 | 0.030029649 | no |
| TXNDC16   | -0.145447326 | -2.642104696 | 0.008640385 | 0.03003243  | no |
| NAA38     | -0.145424299 | -2.64167736  | 0.008651058 | 0.030062479 | no |
| STEAP4    | 0.145422638  | 2.641646543  | 0.008651828 | 0.030062479 | no |
| ID4       | -0.145366255 | -2.640600207 | 0.008678012 | 0.030148588 | no |
| CECR3     | -0.145345159 | -2.640208722 | 0.008687827 | 0.030177808 | no |
| PPM1N     | 0.145314076  | 2.639631921  | 0.008702307 | 0.030219628 | no |
| ARL17A    | -0.145313278 | -2.639617106 | 0.008702679 | 0.030219628 | no |
| SMAD4     | -0.145303802 | -2.639441257 | 0.008707098 | 0.030230087 | no |
| TMED5     | 0.145296049  | 2.639297398  | 0.008710714 | 0.030237758 | no |
| NTM       | -0.145284273 | -2.639078872 | 0.00871621  | 0.030251951 | no |
| C1GALT1   | 0.145272568  | 2.638861667  | 0.008721676 | 0.030266034 | no |
| FBRS      | 0.145244214  | 2.638335523  | 0.008734929 | 0.030307131 | no |
| STXBP3    | 0.145239658  | 2.638250979  | 0.008737061 | 0.030309632 | no |
| LAMP1     | 0.145234426  | 2.638153897  | 0.008739509 | 0.030313231 | no |
| CHRDL2    | 0.145219122  | 2.637869912  | 0.008746673 | 0.030333185 | no |
| MAP3K3    | 0.145153246  | 2.636647532  | 0.008777571 | 0.030435426 | no |
| PDIA2     | -0.145131167 | -2.636237847 | 0.008787948 | 0.030465366 | no |
| KRT33A    | -0.145128845 | -2.636194745 | 0.00878904  | 0.030465366 | no |
| SLFN12L   | 0.14509875   | 2.635636341  | 0.008803204 | 0.030494836 | no |
| LINC00087 | -0.145098591 | -2.635633389 | 0.008803279 | 0.030494836 | no |
| ZNF818P   | 0.145096755  | 2.635599325  | 0.008804144 | 0.030494836 | no |
| PGK1      | 0.145095888  | 2.63558322   | 0.008804553 | 0.030494836 | no |
| GNAI1     | -0.145095708 | -2.635579894 | 0.008804637 | 0.030494836 | no |
| ZNF514    | -0.145070571 | -2.635113477 | 0.008816485 | 0.030530951 | no |
| LINC00338 | -0.145061971 | -2.634953901 | 0.008820542 | 0.030540079 | no |
| L3MBTL1   | -0.145054532 | -2.634815882 | 0.008824052 | 0.030547311 | no |
| SLMO2     | 0.144987065  | 2.633564054  | 0.008855947 | 0.030652786 | no |
| CMSS1     | -0.144963919 | -2.633134599 | 0.008866912 | 0.030685799 | no |
| LOC728040 | 0.144940513  | 2.632700332  | 0.008878013 | 0.030719269 | no |
| FAM45B    | -0.144931943 | -2.632541329 | 0.008882081 | 0.030728396 | no |
| PLEKH01   | 0.144925635  | 2.6324243    | 0.008885075 | 0.030733809 | no |
| TPTE2P3   | -0.144914296 | -2.632213923 | 0.008890461 | 0.030743282 | no |
| RAI1      | -0.144913847 | -2.632205579 | 0.008890675 | 0.030743282 | no |
| TRIM58    | 0.144902395  | 2.631993103  | 0.008896118 | 0.030755626 | no |
| RBM12B    | -0.144900315 | -2.631954511 | 0.008897107 | 0.030755626 | no |
| AMPH      | -0.144894021 | -2.631837745 | 0.0089001   | 0.030761023 | no |
| VCAN      | -0.144878862 | -2.631556488 | 0.008907312 | 0.030781    | no |
| FAM228A   | -0.144874893 | -2.63148285  | 0.008909201 | 0.030782579 | no |
| ZBTB24    | -0.144848757 | -2.630997959 | 0.00892165  | 0.030820636 | no |

|              |              |              |             |             |    |
|--------------|--------------|--------------|-------------|-------------|----|
| SOS2         | -0.144830999 | -2.630668489 | 0.008930117 | 0.030844929 | no |
| NSL1         | 0.14481921   | 2.630449759  | 0.008935743 | 0.0308594   | no |
| GNL2         | 0.144800769  | 2.630107641  | 0.008944548 | 0.030884846 | no |
| LOC100132111 | 0.144787175  | 2.629855431  | 0.008951044 | 0.030902311 | no |
| LOC100132832 | 0.144768464  | 2.629508294  | 0.008959992 | 0.030928235 | no |
| VEZF1        | -0.144706634 | -2.628361223 | 0.008989617 | 0.031025512 | no |
| TCP10L       | -0.144664885 | -2.627586707 | 0.00900967  | 0.031089727 | no |
| BACH2        | -0.144648428 | -2.627281408 | 0.009017585 | 0.031112045 | no |
| TBC1D26      | -0.144644834 | -2.627214739 | 0.009019315 | 0.031113017 | no |
| H2AFY        | 0.144577337  | 2.625962584  | 0.00905185  | 0.031220239 | no |
| MMP9         | 0.144571254  | 2.625849741  | 0.009054787 | 0.031225359 | no |
| GPR133       | 0.144564983  | 2.62573342   | 0.009057816 | 0.031228224 | no |
| THEGL        | 0.144563517  | 2.625706219  | 0.009058524 | 0.031228224 | no |
| E4F1         | -0.144544427 | -2.625352096 | 0.009067751 | 0.031255018 | no |
| SSTR5-AS1    | -0.144541169 | -2.625291653 | 0.009069327 | 0.031255436 | no |
| MRPL46       | -0.144509537 | -2.62470487  | 0.009084636 | 0.031303176 | no |
| ERBB3        | -0.144496317 | -2.62445963  | 0.009091041 | 0.031320225 | no |
| SP6          | 0.144487619  | 2.62429829   | 0.009095257 | 0.031329728 | no |
| AUTS2        | -0.144479898 | -2.624155055 | 0.009099002 | 0.031337604 | no |
| HDGFRP2      | -0.144475095 | -2.62406597  | 0.009101331 | 0.031338375 | no |
| CHPF         | 0.144473424  | 2.624034971  | 0.009102142 | 0.031338375 | no |
| PITPNM1      | 0.144462122  | 2.623825323  | 0.009107627 | 0.031352236 | no |
| CAPNS1       | -0.14445502  | -2.623693578 | 0.009111075 | 0.031359083 | no |
| C3orf45      | -0.144439713 | -2.623409628 | 0.009118511 | 0.031376436 | no |
| ADAMTS13     | -0.144438631 | -2.623389567 | 0.009119037 | 0.031376436 | no |
| IFFO1        | 0.144435091  | 2.623323903  | 0.009120757 | 0.031377332 | no |
| ZBTB26       | -0.144398618 | -2.62264735  | 0.0091385   | 0.031433341 | no |
| NRAS         | 0.144387838  | 2.622447387  | 0.009143751 | 0.031446367 | no |
| FCGR3A       | 0.144339137  | 2.621544029  | 0.009167503 | 0.031523008 | no |
| WISP2        | 0.144320828  | 2.621204408  | 0.009176446 | 0.031548714 | no |
| ZNF22        | -0.14431432  | -2.621083701 | 0.009179627 | 0.031554601 | no |
| IRF2BPL      | 0.144302582  | 2.620865971  | 0.009185367 | 0.031569282 | no |
| UROD         | 0.144297051  | 2.620763392  | 0.009188072 | 0.031573531 | no |
| LOC100506178 | 0.14426163   | 2.620106394  | 0.009205416 | 0.031628074 | no |
| MDFIC        | 0.144250034  | 2.619891299  | 0.009211101 | 0.031642546 | no |
| TMC01        | 0.14422344   | 2.61939804   | 0.009224149 | 0.031681515 | no |
| FGD6         | 0.144219847  | 2.619331389  | 0.009225913 | 0.031681515 | no |
| MPV17L2      | 0.144217904  | 2.619295356  | 0.009226867 | 0.031681515 | no |
| XKR4         | -0.144213379 | -2.619211418 | 0.00922909  | 0.031684084 | no |
| ST8SIA2      | -0.144201089 | -2.618983472 | 0.009235128 | 0.03169975  | no |
| GREM2        | -0.144197099 | -2.618909476 | 0.009237089 | 0.031701418 | no |
| HSDL2        | -0.144175585 | -2.618510428 | 0.00924767  | 0.031732665 | no |
| SH2D5        | -0.144146409 | -2.617969299 | 0.009262036 | 0.031776887 | no |
| WRB          | -0.144123972 | -2.617553159 | 0.009273098 | 0.031809759 | no |
| CPNE2        | -0.144118442 | -2.617450598 | 0.009275826 | 0.031814039 | no |
| ARCN1        | 0.144092482  | 2.616969107  | 0.009288642 | 0.031852914 | no |
| CACNA1I      | -0.144084786 | -2.616826368 | 0.009292445 | 0.03186087  | no |
| DBP          | -0.144074145 | -2.616629021 | 0.009297704 | 0.031873818 | no |
| PHC1         | -0.144043733 | -2.616064988 | 0.009312752 | 0.03192031  | no |
| AQP11        | -0.144035508 | -2.615912434 | 0.009316825 | 0.031927967 | no |
| CXorf57      | -0.144033224 | -2.615870073 | 0.009317957 | 0.031927967 | no |

|           |              |              |             |             |    |
|-----------|--------------|--------------|-------------|-------------|----|
| CYYR1     | 0.144019702  | 2.615619303  | 0.009324657 | 0.031944876 | no |
| RAG1      | 0.144017266  | 2.615574126  | 0.009325865 | 0.031944876 | no |
| UBQLNL    | 0.144005527  | 2.615356397  | 0.009331686 | 0.031959724 | no |
| ANKRD34A  | -0.143989896 | -2.615066514 | 0.009339442 | 0.031981191 | no |
| NAT9      | -0.143985346 | -2.614982135 | 0.009341701 | 0.031983829 | no |
| KLHL24    | -0.143963513 | -2.614577225 | 0.009352547 | 0.032015862 | no |
| RAB14     | -0.143921385 | -2.613795937 | 0.009373506 | 0.032082499 | no |
| DPP7      | 0.14391584   | 2.613693089  | 0.009376268 | 0.032086843 | no |
| HPCA      | -0.143904947 | -2.613491078 | 0.009381695 | 0.032100305 | no |
| ALG8      | 0.143888814  | 2.613191887  | 0.009389739 | 0.032117648 | no |
| KCNV1     | -0.143888786 | -2.613191364 | 0.009389753 | 0.032117648 | no |
| ATP5A1    | -0.143862084 | -2.61269618  | 0.009403079 | 0.032157027 | no |
| CHL1      | 0.143859723  | 2.612652403  | 0.009404258 | 0.032157027 | no |
| CYC1      | -0.143847172 | -2.612419646 | 0.009410529 | 0.03217335  | no |
| RBM19     | -0.143794039 | -2.611434309 | 0.009437116 | 0.032259114 | no |
| CDC42     | -0.143748066 | -2.610581781 | 0.009460173 | 0.032332789 | no |
| ADCY10P1  | -0.143724016 | -2.610135792 | 0.009472255 | 0.032366085 | no |
| SH3BP5    | 0.143722679  | 2.610111013  | 0.009472927 | 0.032366085 | no |
| STON2     | -0.143699875 | -2.609688138 | 0.009484397 | 0.032400122 | no |
| C1orf174  | 0.143686823  | 2.609446109  | 0.009490967 | 0.032417414 | no |
| TALD01    | 0.143676957  | 2.609263154  | 0.009495936 | 0.032429233 | no |
| GCC1      | 0.14366664   | 2.609071846  | 0.009501135 | 0.032439655 | no |
| LOC415056 | -0.14366491  | -2.609039766 | 0.009502007 | 0.032439655 | no |
| ZNF454    | -0.143641161 | -2.608599385 | 0.009513984 | 0.032475387 | no |
| SCAP      | -0.14362494  | -2.608298586 | 0.009522173 | 0.032493105 | no |
| KCTD8     | -0.143624889 | -2.608297644 | 0.009522199 | 0.032493105 | no |
| SLC12A5   | -0.14362025  | -2.60821163  | 0.009524542 | 0.03249594  | no |
| SSTR3     | -0.143566485 | -2.60721468  | 0.009551734 | 0.032583542 | no |
| TMF1      | 0.143563019  | 2.607150411  | 0.009553489 | 0.032584358 | no |
| ZKSCAN1   | -0.143543244 | -2.606783732 | 0.00956351  | 0.032613359 | no |
| KPNA4     | 0.143537511  | 2.606677435  | 0.009566416 | 0.032618095 | no |
| NDUFA8    | -0.143530155 | -2.606541023 | 0.009570148 | 0.032625641 | no |
| CTF1      | 0.143519169  | 2.606337334  | 0.009575721 | 0.032639465 | no |
| FAM219B   | -0.143489383 | -2.605785041 | 0.009590849 | 0.03268142  | no |
| FANCE     | -0.143488946 | -2.605776935 | 0.009591071 | 0.03268142  | no |
| CLIP3     | -0.143478849 | -2.60558972  | 0.009596204 | 0.032693727 | no |
| 40422     | 0.143466943  | 2.60536895   | 0.009602261 | 0.032709174 | no |
| SLC39A10  | -0.143448246 | -2.605022278 | 0.009611777 | 0.032736404 | no |
| HFM1      | -0.143419043 | -2.604480825 | 0.009626658 | 0.03278189  | no |
| MAGIX     | -0.143403479 | -2.604192242 | 0.009634598 | 0.032803729 | no |
| TCERG1    | -0.143391609 | -2.603972155 | 0.009640657 | 0.032819159 | no |
| LOC399829 | -0.143386385 | -2.603875292 | 0.009643324 | 0.032823042 | no |
| WIPF1     | 0.143368276  | 2.603539541  | 0.009652577 | 0.032849331 | no |
| C14orf28  | -0.143352534 | -2.603247674 | 0.009660626 | 0.032871518 | no |
| SST       | -0.143348498 | -2.60317284  | 0.009662691 | 0.032873339 | no |
| SEC63     | -0.143294683 | -2.602175091 | 0.009690258 | 0.032961908 | no |
| NSMCE1    | -0.143273041 | -2.601773833 | 0.009701364 | 0.032994464 | no |
| ZCCHC24   | -0.143215093 | -2.600699479 | 0.009731157 | 0.033090554 | no |
| RASGRP3   | 0.143205157  | 2.600515278  | 0.009736274 | 0.033102715 | no |
| C1orf233  | -0.143197214 | -2.60036801  | 0.009740366 | 0.03311139  | no |
| FRMPD4    | -0.143189893 | -2.600232291 | 0.009744139 | 0.033118976 | no |

|              |              |              |             |             |    |
|--------------|--------------|--------------|-------------|-------------|----|
| RPL32        | -0.143185958 | -2.600159336 | 0.009746167 | 0.033120632 | no |
| GPLY         | 0.143164041  | 2.59975301   | 0.009757472 | 0.033153807 | no |
| GOT1         | -0.143156783 | -2.599618462 | 0.009761218 | 0.033161292 | no |
| TMEM169      | -0.143127677 | -2.599078861 | 0.009776254 | 0.033207125 | no |
| HERC2P9      | -0.143109492 | -2.598741718 | 0.009785659 | 0.033232686 | no |
| C21orf49     | -0.143107147 | -2.598698259 | 0.009786872 | 0.033232686 | no |
| EFCAB14      | 0.143095615  | 2.598484471  | 0.009792841 | 0.033247701 | no |
| H2AFJ        | 0.143045313  | 2.597551934  | 0.009818915 | 0.033329006 | no |
| SYT13        | -0.143043433 | -2.597517081 | 0.00981989  | 0.033329006 | no |
| RABL6        | -0.143036379 | -2.597386316 | 0.009823552 | 0.033336169 | no |
| LOC606724    | 0.143029613  | 2.597260896  | 0.009827065 | 0.033342825 | no |
| PRSS3        | -0.1430163   | -2.597014097 | 0.009833981 | 0.033361024 | no |
| DNALI1       | 0.142962004  | 2.596007557  | 0.009862232 | 0.033451584 | no |
| C1orf21      | -0.142918111 | -2.595193908 | 0.009885123 | 0.033523935 | no |
| PLCL1        | -0.142913835 | -2.595114646 | 0.009887355 | 0.033526215 | no |
| ZNF625-ZNF20 | -0.14288813  | -2.594638142 | 0.009900786 | 0.033566459 | no |
| CNNM4        | 0.142855428  | 2.594031951  | 0.009917895 | 0.03361916  | no |
| CST1         | 0.14283328   | 2.593621395  | 0.009929497 | 0.03365315  | no |
| TTL11        | -0.142828945 | -2.593541039 | 0.00993177  | 0.03365315  | no |
| LACTB        | 0.142827323  | 2.593510986  | 0.00993262  | 0.03365315  | no |
| MAPRE2       | -0.142809968 | -2.59318927  | 0.009941723 | 0.033678682 | no |
| PRPF8        | -0.142770595 | -2.592459453 | 0.0099624   | 0.033739557 | no |
| SLC17A1      | 0.142769774  | 2.592444225  | 0.009962832 | 0.033739557 | no |
| TPT1-AS1     | -0.142751936 | -2.592113597 | 0.009972213 | 0.033766004 | no |
| HEYL         | 0.14274283   | 2.591944803  | 0.009977005 | 0.033776909 | no |
| SCP2         | -0.142720712 | -2.591534821 | 0.009988653 | 0.033811017 | no |
| NSF          | -0.142715355 | -2.59143553  | 0.009991476 | 0.033815246 | no |
| ARMC9        | 0.142709478  | 2.591326597  | 0.009994574 | 0.033820404 | no |
| SLC26A9      | -0.142702935 | -2.591205318 | 0.009998024 | 0.033826752 | no |
| CDC34        | -0.142647858 | -2.590184448 | 0.010027105 | 0.033919804 | no |
| ZFPM2        | -0.142596923 | -2.589240381 | 0.010054066 | 0.034005655 | no |
| SYAP1        | 0.142593726  | 2.589181125  | 0.010055761 | 0.034006035 | no |
| PAPOLA       | 0.142557642  | 2.588512319  | 0.010074903 | 0.034065408 | no |
| WLS          | 0.142550602  | 2.588381853  | 0.010078641 | 0.034070802 | no |
| TOX4         | -0.142548667 | -2.588345975 | 0.010079669 | 0.034070802 | no |
| CCT3         | -0.142531035 | -2.588019188 | 0.010089038 | 0.034097107 | no |
| NECAP1       | -0.142517196 | -2.587762697 | 0.010096397 | 0.034116613 | no |
| LOC100130539 | 0.142506707  | 2.5875683    | 0.010101977 | 0.034130104 | no |
| IPO5         | -0.14249886  | -2.587422852 | 0.010106154 | 0.03413885  | no |
| CCDC167      | -0.142480379 | -2.587080341 | 0.010115997 | 0.034161735 | no |
| ANGPT2       | 0.142480171  | 2.587076481  | 0.010116108 | 0.034161735 | no |
| C3orf49      | -0.142450014 | -2.586517564 | 0.010132189 | 0.034210663 | no |
| ARL6IP6      | -0.142435848 | -2.586255023 | 0.01013975  | 0.034230816 | no |
| GABRA1       | -0.142393905 | -2.58547768  | 0.010162168 | 0.034301108 | no |
| SQLE         | -0.142369396 | -2.585023464 | 0.010175288 | 0.034336159 | no |
| LOC100287015 | -0.142368537 | -2.585007547 | 0.010175748 | 0.034336159 | no |
| SERINC1      | -0.142334045 | -2.584368311 | 0.010194238 | 0.03439315  | no |
| GPRC5A       | 0.142326528  | 2.584229003  | 0.010198271 | 0.034393601 | no |
| LIFR         | -0.142325284 | -2.584205946 | 0.010198939 | 0.034393601 | no |
| ZNF594       | -0.142324849 | -2.584197882 | 0.010199173 | 0.034393601 | no |
| CCKBR        | -0.14231298  | -2.583977926 | 0.010205545 | 0.03440969  | no |

|              |              |              |             |             |    |
|--------------|--------------|--------------|-------------|-------------|----|
| PCDHB2       | -0.142308898 | -2.583902277 | 0.010207737 | 0.034411683 | no |
| LOC729911    | -0.142285479 | -2.583468271 | 0.010220323 | 0.034448708 | no |
| ZNF32-AS2    | -0.14227432  | -2.583261475 | 0.010226325 | 0.034463532 | no |
| SMARCC1      | -0.142270397 | -2.583188777 | 0.010228435 | 0.034465241 | no |
| LOC283335    | -0.142266776 | -2.58312166  | 0.010230384 | 0.034466404 | no |
| ARMCX2       | 0.142233142  | 2.582498366  | 0.0102485   | 0.034522023 | no |
| LINC00578    | 0.142168713  | 2.581304398  | 0.010283281 | 0.034633755 | no |
| ADAM20P1     | -0.142146131 | -2.580885927 | 0.010295496 | 0.034669463 | no |
| LOC285484    | -0.142111503 | -2.58024424  | 0.010314253 | 0.034724864 | no |
| DTX4         | -0.142109792 | -2.580212546 | 0.01031518  | 0.034724864 | no |
| XRCC3        | -0.142057434 | -2.579242331 | 0.010343599 | 0.034815081 | no |
| KHSRP        | -0.142043553 | -2.578985103 | 0.010351146 | 0.034835026 | no |
| LOC100133612 | 0.142033408  | 2.578797123  | 0.010356664 | 0.034848139 | no |
| FLJ43315     | 0.142016493  | 2.578483678  | 0.010365871 | 0.034873657 | no |
| B4GALT6      | -0.141996662 | -2.578116224 | 0.010376673 | 0.034904536 | no |
| LOC285419    | 0.141974545  | 2.577706394  | 0.010388733 | 0.034939634 | no |
| NBR1         | -0.141960962 | -2.577454713 | 0.010396145 | 0.034959093 | no |
| PARK2        | -0.14195405  | -2.577326629 | 0.01039992  | 0.034966313 | no |
| NIPSNAP1     | -0.141949816 | -2.577248179 | 0.010402232 | 0.034968616 | no |
| CELF6        | -0.141940017 | -2.577066606 | 0.010407585 | 0.034981141 | no |
| ST7-OT3      | -0.141928499 | -2.57685318  | 0.010413881 | 0.034996828 | no |
| PLSCR3       | 0.141921036  | 2.576714908  | 0.010417961 | 0.035005067 | no |
| SIK3         | -0.141914493 | -2.576593669 | 0.010421541 | 0.035011619 | no |
| RETSAT       | 0.141899326  | 2.576312632  | 0.010429841 | 0.035034029 | no |
| BIK          | 0.141893373  | 2.576202331  | 0.010433101 | 0.035039501 | no |
| DNAJC2       | 0.141874191  | 2.575846914  | 0.01044361  | 0.035069315 | no |
| NCK2         | 0.141866035  | 2.575695785  | 0.010448081 | 0.035078849 | no |
| C16orf80     | -0.141852443 | -2.575443956 | 0.010455536 | 0.035098394 | no |
| CACNA2D1     | -0.141837196 | -2.575161446 | 0.010463904 | 0.035121001 | no |
| SSPO         | -0.14181677  | -2.574782988 | 0.010475124 | 0.03515317  | no |
| WNT9B        | -0.141806802 | -2.574598296 | 0.010480604 | 0.035166067 | no |
| TEX10        | -0.141734823 | -2.573264666 | 0.010520246 | 0.03529357  | no |
| ZBTB43       | -0.141695659 | -2.572539056 | 0.010541871 | 0.035360598 | no |
| MTERFD3      | -0.141673977 | -2.57213735  | 0.01055386  | 0.035395289 | no |
| CYP4X1       | -0.141663225 | -2.571938143 | 0.01055981  | 0.035409717 | no |
| NECAB1       | -0.141635611 | -2.571426534 | 0.010575104 | 0.035450253 | no |
| CTR9         | 0.141631733  | 2.571354686  | 0.010577254 | 0.035450253 | no |
| ZNF845       | 0.141629589  | 2.571314977  | 0.010578442 | 0.035450253 | no |
| SGK196       | -0.141627238 | -2.571271418 | 0.010579745 | 0.035450253 | no |
| TOX          | -0.141626515 | -2.571258029 | 0.010580146 | 0.035450253 | no |
| ZNF534       | -0.14161366  | -2.571019858 | 0.010587276 | 0.035464891 | no |
| LOC100287879 | -0.141611986 | -2.570988844 | 0.010588205 | 0.035464891 | no |
| NBL1         | 0.141609713  | 2.570946739  | 0.010589466 | 0.035464891 | no |
| SDHB         | 0.141595777  | 2.570688546  | 0.010597201 | 0.035485268 | no |
| PSORS1C1     | 0.141582119  | 2.570435511  | 0.010604787 | 0.035502782 | no |
| POU2F2       | 0.141580412  | 2.570403888  | 0.010605735 | 0.035502782 | no |
| SOHLH1       | -0.141577025 | -2.570341133 | 0.010607618 | 0.035503553 | no |
| LCMT1        | -0.14156414  | -2.570102434 | 0.01061478  | 0.035518751 | no |
| ZNF37BP      | -0.141560657 | -2.570037893 | 0.010616717 | 0.035518751 | no |
| CGB          | 0.141558797  | 2.570003444  | 0.010617751 | 0.035518751 | no |
| TSIX         | -0.141556967 | -2.569969536 | 0.010618769 | 0.035518751 | no |

|              |              |              |             |             |    |
|--------------|--------------|--------------|-------------|-------------|----|
| GRM5         | -0.141553108 | -2.569898041 | 0.010620916 | 0.035520403 | no |
| ARNTL2       | 0.141548786  | 2.569817982  | 0.010623321 | 0.035522916 | no |
| USP3         | -0.141522089 | -2.569323381 | 0.010638186 | 0.035567089 | no |
| PLTP         | 0.141505613  | 2.569018148  | 0.010647368 | 0.035592253 | no |
| XYLT2        | 0.141446429  | 2.567921731  | 0.010680413 | 0.035697161 | no |
| FAM153A      | -0.141436312 | -2.567734308 | 0.01068607  | 0.035710517 | no |
| VPRBP        | -0.1414295   | -2.56760811  | 0.010689881 | 0.035717699 | no |
| SEPT7L       | -0.141414268 | -2.567325949 | 0.010698407 | 0.035740628 | no |
| SPRYD7       | -0.141370264 | -2.566510762 | 0.010723072 | 0.035814856 | no |
| RPS2P32      | 0.141368682  | 2.566481471  | 0.010723959 | 0.035814856 | no |
| ZFHX4        | -0.141362776 | -2.566372055 | 0.010727273 | 0.035820359 | no |
| CALCRL       | -0.141325357 | -2.565678881 | 0.010748294 | 0.035882816 | no |
| EXOSC3       | 0.141323537  | 2.565645173  | 0.010749317 | 0.035882816 | no |
| QSER1        | -0.14130862  | -2.565368842 | 0.010757707 | 0.035905248 | no |
| KCNA1        | -0.141276084 | -2.564766142 | 0.010776028 | 0.035960811 | no |
| SLX4         | -0.141269928 | -2.564652104 | 0.010779498 | 0.035966805 | no |
| CD274        | 0.141265488  | 2.564569863  | 0.010782001 | 0.035969572 | no |
| RGCC         | -0.141206462 | -2.563476476 | 0.010815325 | 0.036071787 | no |
| TMED7        | 0.141205274  | 2.563454471  | 0.010815997 | 0.036071787 | no |
| PATL1        | 0.141195217  | 2.563268194  | 0.010821684 | 0.036085153 | no |
| NRGN         | -0.141143155 | -2.562303827 | 0.010851168 | 0.036177854 | no |
| LOC100289230 | -0.141114944 | -2.56178129  | 0.010867174 | 0.036225598 | no |
| RPF1         | 0.14110987   | 2.561687304  | 0.010870055 | 0.036229582 | no |
| LOC100505679 | -0.141097928 | -2.56146611  | 0.010876838 | 0.036246569 | no |
| ARRDC5       | 0.14108507   | 2.561227952  | 0.010884146 | 0.036264646 | no |
| NAA50        | 0.141081126  | 2.561154887  | 0.010886389 | 0.036264646 | no |
| AIFM2        | 0.141079479  | 2.561124389  | 0.010887325 | 0.036264646 | no |
| LOC145837    | -0.141075404 | -2.561048913 | 0.010889642 | 0.036266745 | no |
| TMEM186      | -0.141067932 | -2.560910499 | 0.010893893 | 0.036275281 | no |
| MED12        | -0.141063199 | -2.560822837 | 0.010896587 | 0.036278628 | no |
| C10orf111    | -0.141054493 | -2.560661591 | 0.010901542 | 0.036289503 | no |
| AMOT         | -0.141039449 | -2.560382941 | 0.01091011  | 0.036312149 | no |
| GABRA4       | -0.141036616 | -2.560330471 | 0.010911724 | 0.036312149 | no |
| AGMAT        | 0.141031599  | 2.560237538  | 0.010914583 | 0.03631604  | no |
| SPAG1        | 0.141024495  | 2.560105965  | 0.010918632 | 0.036323889 | no |
| LRP8         | -0.141005354 | -2.559751426 | 0.01092955  | 0.036354583 | no |
| VPREB3       | 0.140984939  | 2.559373311  | 0.010941204 | 0.036382599 | no |
| H2AFV        | -0.140984669 | -2.559368317 | 0.010941358 | 0.036382599 | no |
| DNM1         | -0.14094987  | -2.558723788 | 0.01096125  | 0.036443105 | no |
| RERE         | -0.140945443 | -2.558641781 | 0.010963784 | 0.036445889 | no |
| TMEM27       | -0.140906359 | -2.557917899 | 0.010986168 | 0.03651465  | no |
| DHX30        | -0.140890135 | -2.557617412 | 0.010995471 | 0.036539922 | no |
| KLHL35       | -0.140874407 | -2.557326123 | 0.011004497 | 0.036564262 | no |
| ALDH3A1      | 0.140868129  | 2.557209847  | 0.011008102 | 0.036570585 | no |
| EBAG9        | 0.14083278   | 2.556555167  | 0.011028417 | 0.036632413 | no |
| DBI          | -0.14082798  | -2.556466263 | 0.011031178 | 0.036635923 | no |
| LIPE         | -0.140795687 | -2.555868191 | 0.011049771 | 0.036689519 | no |
| PABPN1       | -0.140794021 | -2.555837329 | 0.011050731 | 0.036689519 | no |
| MSH5         | -0.140770615 | -2.555403859 | 0.011064225 | 0.036728645 | no |
| GTF2H2B      | -0.140730841 | -2.554667253 | 0.011087189 | 0.036799192 | no |
| PHIP         | -0.140691719 | -2.553942736 | 0.011109817 | 0.036863789 | no |



|            |              |              |             |             |    |
|------------|--------------|--------------|-------------|-------------|----|
| TRHDE      | -0.140691263 | -2.553934276 | 0.011110082 | 0.036863789 | no |
| ZNF606     | -0.140678288 | -2.553693998 | 0.011117595 | 0.036883026 | no |
| KIR2DL4    | 0.140655033  | 2.553263333  | 0.011131074 | 0.036922043 | no |
| CCL13      | 0.140643739  | 2.553054182  | 0.011137625 | 0.036938072 | no |
| BHMT2      | 0.140628404  | 2.552770191  | 0.011146526 | 0.036956992 | no |
| BCDIN3D    | -0.140627985 | -2.552762436 | 0.011146769 | 0.036956992 | no |
| ZNF724P    | -0.140618699 | -2.552590475 | 0.011152162 | 0.036969168 | no |
| PBRM1      | -0.140615173 | -2.55252517  | 0.011154211 | 0.036970257 | no |
| CCT7       | -0.14061089  | -2.552445851 | 0.011156699 | 0.036972803 | no |
| GRIN2B     | -0.140602998 | -2.552299705 | 0.011161286 | 0.036982301 | no |
| RPL30      | -0.140595823 | -2.552166833 | 0.011165458 | 0.03699042  | no |
| SLC4A10    | -0.140592488 | -2.552105074 | 0.011167397 | 0.036991143 | no |
| ATP2B3     | -0.140583142 | -2.551931995 | 0.011172834 | 0.037003448 | no |
| IPP        | 0.140567443  | 2.55164128   | 0.011181971 | 0.037028004 | no |
| RNASEK     | 0.140551183  | 2.551340176  | 0.011191442 | 0.037053657 | no |
| EPHA1-AS1  | 0.140542636  | 2.551181906  | 0.011196423 | 0.037064439 | no |
| LOC728024  | -0.140528175 | -2.550914112 | 0.011204856 | 0.037086641 | no |
| HES7       | -0.140500179 | -2.550395685 | 0.011221197 | 0.037135008 | no |
| SLC2A4     | -0.140492405 | -2.550251727 | 0.011225738 | 0.037144317 | no |
| WDR55      | 0.140486787  | 2.550147696  | 0.011229021 | 0.037144459 | no |
| KIF9-AS1   | -0.140486416 | -2.550140825 | 0.011229238 | 0.037144459 | no |
| GRHPR      | -0.140467782 | -2.549795764 | 0.011240133 | 0.037174777 | no |
| LGI3       | -0.140463207 | -2.549711052 | 0.011242809 | 0.037177906 | no |
| PKNOX2     | -0.140451902 | -2.549501705 | 0.011249425 | 0.037194061 | no |
| SHISA8     | -0.140447247 | -2.549415505 | 0.01125215  | 0.037197349 | no |
| INHBB      | 0.140440397  | 2.549288668  | 0.011256161 | 0.037204885 | no |
| SNHG7      | -0.140428571 | -2.549069679 | 0.01126309  | 0.03722206  | no |
| CYS1       | -0.140419214 | -2.548896418 | 0.011268574 | 0.037234458 | no |
| PREPL      | -0.140397049 | -2.548485983 | 0.011281575 | 0.037271686 | no |
| SPPL3      | -0.140386992 | -2.548299761 | 0.011287478 | 0.037285457 | no |
| STOM       | 0.140379661  | 2.548164003  | 0.011291783 | 0.037293946 | no |
| C8orf82    | -0.140371227 | -2.548007837 | 0.011296737 | 0.037304575 | no |
| DEFB109P1B | -0.140366416 | -2.547918755 | 0.011299564 | 0.037306906 | no |
| PPYR1      | 0.140364117  | 2.547876192  | 0.011300915 | 0.037306906 | no |
| CLCN3      | -0.140339213 | -2.547415049 | 0.01131556  | 0.037349516 | no |
| C1orf51    | -0.140296602 | -2.546626048 | 0.011340657 | 0.037426606 | no |
| LOC286184  | -0.140289956 | -2.546502984 | 0.011344576 | 0.037433791 | no |
| MESDC2     | 0.140262983  | 2.54600355   | 0.011360493 | 0.037480557 | no |
| TMED8      | -0.140243253 | -2.545638237 | 0.011372148 | 0.037510702 | no |
| U2SURP     | -0.140241607 | -2.54560776  | 0.011373121 | 0.037510702 | no |
| FAM131A    | -0.140226592 | -2.545329741 | 0.011381998 | 0.037530503 | no |
| TCEAL7     | -0.140225546 | -2.545310387 | 0.011382617 | 0.037530503 | no |
| SLC27A3    | 0.140198291  | 2.544805749  | 0.011398748 | 0.037577924 | no |
| COMT       | -0.14018104  | -2.54448633  | 0.011408968 | 0.03760585  | no |
| MTHFD1L    | 0.140174754  | 2.54436994   | 0.011412695 | 0.037612363 | no |
| IL11RA     | -0.140171279 | -2.544305605 | 0.011414755 | 0.037613385 | no |
| HTR5A      | -0.140134199 | -2.543619066 | 0.01143676  | 0.03768012  | no |
| DCP1B      | 0.140115951  | 2.543281201  | 0.011447604 | 0.037709948 | no |
| LINC00176  | -0.140113058 | -2.543227649 | 0.011449324 | 0.037709948 | no |
| TCERG1L    | -0.14008695  | -2.542744262 | 0.011464855 | 0.037755318 | no |
| NTNG1      | 0.140063078  | 2.542302285  | 0.011479073 | 0.037796348 | no |

|            |              |              |             |             |    |
|------------|--------------|--------------|-------------|-------------|----|
| ZFP69B     | -0.140046217 | -2.541990122 | 0.011489124 | 0.037823648 | no |
| COLEC11    | 0.140030984  | 2.541708101  | 0.011498212 | 0.037847767 | no |
| DNM1P35    | 0.140023801  | 2.541575109  | 0.0115025   | 0.037856082 | no |
| LYPD8      | -0.140011026 | -2.541338599 | 0.011510128 | 0.03787033  | no |
| FDCSP      | 0.14001065   | 2.541331623  | 0.011510353 | 0.03787033  | no |
| THAP4      | 0.140000442  | 2.54114265   | 0.011516452 | 0.037880994 | no |
| MYOM2      | -0.139999325 | -2.541121963 | 0.011517119 | 0.037880994 | no |
| LOC645638  | 0.139971929  | 2.540614757  | 0.011533503 | 0.037929077 | no |
| USP10      | -0.139928116 | -2.539803637 | 0.011559747 | 0.038009566 | no |
| OAF        | 0.13991948   | 2.539643751  | 0.011564926 | 0.038020779 | no |
| TCF25      | -0.139895466 | -2.539199173 | 0.011579339 | 0.03806234  | no |
| FCH02      | 0.139881204  | 2.538935145  | 0.011587906 | 0.038084675 | no |
| VGLL3      | 0.139871902  | 2.538762936  | 0.011593497 | 0.038097224 | no |
| MMP17      | -0.139868302 | -2.538696294 | 0.011595661 | 0.03809851  | no |
| SLC6A10P   | -0.139848128 | -2.538322813 | 0.011607797 | 0.038132552 | no |
| TAF5       | -0.139836737 | -2.53811195  | 0.011614653 | 0.038149245 | no |
| CEP170P1   | -0.139802973 | -2.537486897 | 0.011634999 | 0.038205914 | no |
| GRIP1      | -0.139802206 | -2.53747269  | 0.011635462 | 0.038205914 | no |
| EVI5       | 0.139778696  | 2.537037477  | 0.011649647 | 0.03824665  | no |
| LOC440434  | -0.13975214  | -2.536545871 | 0.01166569  | 0.038293468 | no |
| ZNF467     | 0.139748206  | 2.536473044  | 0.011668068 | 0.038295425 | no |
| EXOC6B     | -0.139737851 | -2.536281347 | 0.01167433  | 0.038310127 | no |
| WDR85      | -0.139733237 | -2.536195936 | 0.011677121 | 0.038313435 | no |
| CASP9      | -0.139688917 | -2.535375511 | 0.01170396  | 0.038395636 | no |
| LRFN2      | -0.139681558 | -2.535239281 | 0.011708422 | 0.038404412 | no |
| SIK1       | 0.1396737    | 2.535093818  | 0.011713188 | 0.038408779 | no |
| FBXW4P1    | -0.13967347  | -2.535089557 | 0.011713328 | 0.038408779 | no |
| ZSCAN5A    | 0.139644072  | 2.534545363  | 0.011731174 | 0.038461428 | no |
| S100A13    | 0.139628421  | 2.534255655  | 0.011740685 | 0.038486737 | no |
| UBALD1     | -0.13958156  | -2.533388219 | 0.011769201 | 0.038573619 | no |
| CYP21A2    | 0.139578971  | 2.533340305  | 0.011770778 | 0.038573619 | no |
| PEMT       | -0.139566478 | -2.533109054 | 0.011778392 | 0.038592685 | no |
| VBP1       | -0.139535454 | -2.532534788 | 0.011797318 | 0.038648805 | no |
| EPDR1      | 0.139532128  | 2.532473228  | 0.011799348 | 0.038649565 | no |
| ZFP64      | 0.139479972  | 2.53150782   | 0.011831231 | 0.038747107 | no |
| CNTN6      | -0.139477519 | -2.531462413 | 0.011832733 | 0.038747107 | no |
| CA8        | -0.139447611 | -2.530908831 | 0.011851052 | 0.038801181 | no |
| PIGZ       | -0.139438624 | -2.530742485 | 0.011856561 | 0.038813306 | no |
| SNHG12     | 0.139406307  | 2.530144319  | 0.011876392 | 0.038872303 | no |
| RBM12B-AS1 | -0.139364471 | -2.52936999  | 0.011902107 | 0.038950538 | no |
| H6PD       | 0.139347311  | 2.529052376  | 0.011912669 | 0.038979167 | no |
| ADORA1     | 0.139319602  | 2.528539515  | 0.011929742 | 0.039029088 | no |
| ZNF702P    | 0.139293874  | 2.528063327  | 0.011945613 | 0.039075063 | no |
| IGHMBP2    | -0.139269122 | -2.527605224 | 0.011960899 | 0.039119112 | no |
| OGDHL      | -0.139230402 | -2.526888588 | 0.011984847 | 0.039191472 | no |
| EPS15      | 0.139218592  | 2.526670024  | 0.011992159 | 0.039208759 | no |
| NRG3       | -0.139215972 | -2.526621523 | 0.011993783 | 0.039208759 | no |
| PTPN11     | -0.13919134  | -2.526165658 | 0.012009049 | 0.039252695 | no |
| SLC02A1    | 0.139171482  | 2.525798129  | 0.012021369 | 0.03928699  | no |
| ZNF611     | -0.139160113 | -2.525587732 | 0.012028427 | 0.03930408  | no |
| CTDSP1     | 0.139126169  | 2.524959522  | 0.012049524 | 0.039367029 | no |

|              |              |              |             |             |    |
|--------------|--------------|--------------|-------------|-------------|----|
| QPCTL        | 0.139113681  | 2.524728405  | 0.012057293 | 0.039384017 | no |
| VSTM5        | -0.139111921 | -2.52469583  | 0.012058389 | 0.039384017 | no |
| PRRX2        | 0.139106028  | 2.524586772  | 0.012062057 | 0.039390011 | no |
| STAT5B       | -0.139075605 | -2.524023752 | 0.01208101  | 0.039445909 | no |
| TLL1         | -0.139041348 | -2.523389767 | 0.012102383 | 0.039509693 | no |
| RPL31        | -0.139031924 | -2.523215362 | 0.012108268 | 0.039522903 | no |
| GABRA5       | -0.139014292 | -2.522889064 | 0.012119287 | 0.039550178 | no |
| WDR37        | -0.139012662 | -2.522858914 | 0.012120305 | 0.039550178 | no |
| RNF20        | -0.138961181 | -2.521906204 | 0.012152529 | 0.03964889  | no |
| DHRS11       | -0.138958442 | -2.521855528 | 0.012154245 | 0.03964889  | no |
| CLPX         | -0.138945786 | -2.521621307 | 0.01216218  | 0.039668753 | no |
| WISP1        | 0.138941821  | 2.521547944  | 0.012164666 | 0.039670841 | no |
| PLIN1        | -0.138927018 | -2.521273997 | 0.012173955 | 0.039690404 | no |
| FAM150A      | -0.138926374 | -2.521262086 | 0.012174359 | 0.039690404 | no |
| OSBPL11      | -0.138917316 | -2.52109446  | 0.012180045 | 0.03970292  | no |
| CABP1        | -0.138906222 | -2.520889175 | 0.012187013 | 0.039719607 | no |
| NDUFC2       | -0.138881685 | -2.520435103 | 0.012202437 | 0.039763846 | no |
| KIF5A        | -0.138863846 | -2.520105001 | 0.012213661 | 0.039791863 | no |
| CYB5B        | 0.138862135  | 2.520073346  | 0.012214737 | 0.039791863 | no |
| SDSL         | 0.138815164  | 2.519204163  | 0.012244337 | 0.03987897  | no |
| SIAH1        | -0.138813816 | -2.519179211 | 0.012245188 | 0.03987897  | no |
| ATP5D        | -0.138808389 | -2.519078785 | 0.012248612 | 0.039884078 | no |
| FONG         | 0.13880445   | 2.519005907  | 0.012251097 | 0.039886128 | no |
| S100A6       | 0.138790346  | 2.518744915  | 0.012260002 | 0.039909074 | no |
| USP7         | -0.138782401 | -2.518597899 | 0.012265021 | 0.039919364 | no |
| HNRNPA3      | -0.138774513 | -2.518451944 | 0.012270005 | 0.039929539 | no |
| VSIG1        | 0.138716503  | 2.517378524  | 0.012306716 | 0.040042942 | no |
| CLDND1       | -0.13871273  | -2.517308714 | 0.012309107 | 0.040044659 | no |
| TPP2         | -0.138704672 | -2.517159612 | 0.012314215 | 0.040055213 | no |
| CECR5-AS1    | -0.138673716 | -2.516586813 | 0.012333855 | 0.040113027 | no |
| FAM131C      | -0.138652964 | -2.516202825 | 0.012347037 | 0.040149823 | no |
| BPIFA1       | 0.138647482  | 2.516101389  | 0.012350522 | 0.040155077 | no |
| CEP192       | -0.138637984 | -2.51592566  | 0.01235656  | 0.040168632 | no |
| RPLP0        | -0.13863307  | -2.515834735 | 0.012359685 | 0.040172716 | no |
| MACROD2      | -0.138626859 | -2.515719815 | 0.012363636 | 0.040179481 | no |
| EXD3         | -0.138622563 | -2.515640327 | 0.01236637  | 0.040182289 | no |
| EPB41L4B     | -0.138610947 | -2.515425381 | 0.012373765 | 0.040200238 | no |
| TRIAP1       | 0.138583228  | 2.514912516  | 0.012391424 | 0.040251527 | no |
| HNRNPA1P10   | -0.13857779  | -2.514811891 | 0.012394892 | 0.040256706 | no |
| CTAGE10P     | -0.138571788 | -2.51470085  | 0.012398719 | 0.040263052 | no |
| ADCK1        | -0.138561413 | -2.514508885 | 0.012405339 | 0.040274767 | no |
| IL12A        | -0.138560259 | -2.514487532 | 0.012406075 | 0.040274767 | no |
| ANKRD34C     | -0.138528874 | -2.513906838 | 0.012426119 | 0.040333743 | no |
| MAGEL2       | -0.138517773 | -2.513701434 | 0.012433215 | 0.040350684 | no |
| RAB39B       | -0.138498367 | -2.513342379 | 0.012445629 | 0.040384874 | no |
| LOC100505783 | -0.13848198  | -2.513039194 | 0.01245612  | 0.040412814 | no |
| TATDN3       | 0.138421075  | 2.511912355  | 0.012495181 | 0.040533423 | no |
| TRPV6        | -0.138392841 | -2.511389984 | 0.012513325 | 0.040581108 | no |
| GNG3         | -0.138392324 | -2.511380426 | 0.012513657 | 0.040581108 | no |
| NEK8         | 0.138368184  | 2.510933808  | 0.012529189 | 0.040625347 | no |
| TMEM130      | -0.138337857 | -2.510372735 | 0.012548726 | 0.040682556 | no |

|              |              |              |             |             |    |
|--------------|--------------|--------------|-------------|-------------|----|
| LOC100271702 | -0.138333312 | -2.510288637 | 0.012551656 | 0.040685919 | no |
| LRRC7        | -0.138278557 | -2.50927565  | 0.012587005 | 0.040794347 | no |
| ZBTB8B       | -0.138241234 | -2.508585172 | 0.01261115  | 0.040866438 | no |
| KCNS2        | -0.138213464 | -2.508071439 | 0.012629141 | 0.040918568 | no |
| HK2          | 0.138209372  | 2.507995734  | 0.012631794 | 0.040920995 | no |
| PCDHGA12     | 0.138201501  | 2.507850128  | 0.012636898 | 0.040931361 | no |
| APCDD1L      | 0.138195359  | 2.507736495  | 0.012640883 | 0.040938098 | no |
| GLT1D1       | -0.138186309 | -2.507569065 | 0.012646756 | 0.040950948 | no |
| BCKDK        | 0.138171448  | 2.507294151  | 0.012656405 | 0.040976018 | no |
| SPDEF        | -0.138153707 | -2.50696596  | 0.012667933 | 0.041007161 | no |
| CBX4         | -0.138137199 | -2.506660567 | 0.012678668 | 0.04103573  | no |
| ASPH         | -0.138133179 | -2.5065862   | 0.012681283 | 0.041038015 | no |
| POU3F2       | -0.138130003 | -2.506527442 | 0.01268335  | 0.041038523 | no |
| DONSON       | 0.138115818  | 2.506265039  | 0.012692583 | 0.04105675  | no |
| CCNI         | -0.138115479 | -2.506258775 | 0.012692804 | 0.04105675  | no |
| GRM2         | -0.138099205 | -2.505957724 | 0.012703405 | 0.041079164 | no |
| ST3GAL2      | 0.138096335  | 2.50590462   | 0.012705275 | 0.041079164 | no |
| TOLLIP       | -0.13809604  | -2.505899164 | 0.012705468 | 0.041079164 | no |
| SATB2        | -0.138084029 | -2.505676975 | 0.012713298 | 0.041092443 | no |
| LOC728190    | -0.138082914 | -2.505656345 | 0.012714025 | 0.041092443 | no |
| LOC100133985 | -0.138080942 | -2.505619872 | 0.012715311 | 0.041092443 | no |
| C9orf9       | 0.138073793  | 2.505487631  | 0.012719974 | 0.041101331 | no |
| LOC100268168 | -0.138067567 | -2.505372451 | 0.012724036 | 0.041108278 | no |
| TCTA         | 0.13806227   | 2.505274464  | 0.012727493 | 0.041113266 | no |
| EDARADD      | 0.13804828   | 2.505015679  | 0.012736628 | 0.041136589 | no |
| AKR1B15      | 0.138045233  | 2.5049593    | 0.012738618 | 0.041136837 | no |
| ADAT3        | 0.138023255  | 2.504552749  | 0.012752982 | 0.041174882 | no |
| SLC7A8       | 0.138021344  | 2.504517403  | 0.012754232 | 0.041174882 | no |
| KLF1         | -0.13801244  | -2.504352689 | 0.012760056 | 0.041187497 | no |
| LAMP2        | 0.138000742  | 2.504136297  | 0.01276771  | 0.041206017 | no |
| SLC25A21     | -0.137975979 | -2.50367823  | 0.012783928 | 0.041252162 | no |
| ZNF33BP1     | -0.137962225 | -2.503423817 | 0.012792943 | 0.041275056 | no |
| HTT-AS1      | -0.137951085 | -2.503217756 | 0.012800249 | 0.041292429 | no |
| ADCY8        | -0.137939576 | -2.503004859 | 0.012807802 | 0.041310591 | no |
| RFC5         | -0.137916374 | -2.502575686 | 0.012823038 | 0.041353528 | no |
| LOC340017    | -0.137908871 | -2.502436896 | 0.012827969 | 0.041363223 | no |
| LOC389023    | -0.137904224 | -2.502350931 | 0.012831024 | 0.041366867 | no |
| GPR26        | -0.137885391 | -2.502002587 | 0.012843409 | 0.041400587 | no |
| LINC00669    | 0.137871617  | 2.501747791  | 0.012852476 | 0.041423598 | no |
| MCCC1        | -0.137865637 | -2.501637185 | 0.012856413 | 0.041430075 | no |
| GATA3-AS1    | 0.137858451  | 2.501504266  | 0.012861146 | 0.041439114 | no |
| C15orf38-AP3 | -0.137852566 | -2.501395421 | 0.012865023 | 0.041445392 | no |
| NDUFV1       | -0.13782616  | -2.500906981 | 0.012882434 | 0.041490912 | no |
| ARHGEF10L    | -0.13782528  | -2.50089071  | 0.012883014 | 0.041490912 | no |
| SIX5         | 0.137775346  | 2.499967111  | 0.012915995 | 0.041590897 | no |
| ANKHD1-EIF4E | 0.137720026  | 2.498943889  | 0.012952621 | 0.041702587 | no |
| RAPGEF3      | -0.13769564  | -2.498492854 | 0.012968795 | 0.041748407 | no |
| UTRN         | 0.137670474  | 2.498027393  | 0.012985505 | 0.041795938 | no |
| AGRN         | 0.137652759  | 2.497699753  | 0.012997278 | 0.041827569 | no |
| EPB41L3      | -0.13761906  | -2.497076478 | 0.013019702 | 0.041893459 | no |
| TLR4         | 0.137594938  | 2.496630344  | 0.013035774 | 0.041938894 | no |

|              |              |              |             |             |    |
|--------------|--------------|--------------|-------------|-------------|----|
| ISOC2        | 0.137577326  | 2.496304606  | 0.013047519 | 0.041970399 | no |
| LOC100128264 | -0.137569337 | -2.496156852 | 0.01305285  | 0.041981263 | no |
| NID1         | 0.137505698  | 2.494979879  | 0.013095384 | 0.04211176  | no |
| INPP1        | -0.13749999  | -2.494874327 | 0.013099204 | 0.042117744 | no |
| GLP1R        | -0.137493783 | -2.494759518 | 0.013103361 | 0.042124806 | no |
| IPMK         | -0.137484887 | -2.49459501  | 0.013109319 | 0.042137657 | no |
| CAB39L       | -0.13744273  | -2.493815359 | 0.013137589 | 0.04222221  | no |
| LIPT2        | 0.137425919  | 2.493504462  | 0.013148877 | 0.042248031 | no |
| FRK          | 0.13742491   | 2.493485793  | 0.013149555 | 0.042248031 | no |
| STK38L       | 0.137407282  | 2.493159789  | 0.013161401 | 0.042274717 | no |
| TECPR1       | -0.137406696 | -2.493148953 | 0.013161795 | 0.042274717 | no |
| TADA2B       | -0.137399909 | -2.49302344  | 0.013166358 | 0.042276229 | no |
| SHANK3       | -0.137398771 | -2.493002396 | 0.013167124 | 0.042276229 | no |
| ARMC10       | 0.137396322  | 2.492957109  | 0.013168771 | 0.042276229 | no |
| TBC1D10B     | -0.137394295 | -2.492919625 | 0.013170134 | 0.042276229 | no |
| TMEM18       | -0.137384003 | -2.492729287 | 0.013177059 | 0.042292141 | no |
| ARSK         | 0.137377004  | 2.49259985   | 0.01318177  | 0.042297341 | no |
| EGFLAM-AS4   | 0.137375748  | 2.49257663   | 0.013182615 | 0.042297341 | no |
| VPS13D       | -0.137325877 | -2.49165435  | 0.013216229 | 0.042393205 | no |
| LOC643339    | 0.137325566  | 2.491648604  | 0.013216438 | 0.042393205 | no |
| ZNF365       | -0.137311634 | -2.491390958 | 0.013225842 | 0.042417038 | no |
| ZNF99        | -0.137290815 | -2.491005964 | 0.013239905 | 0.04245383  | no |
| ACACA        | -0.137288803 | -2.490968758 | 0.013241265 | 0.04245383  | no |
| CDH6         | 0.137284252  | 2.490884598  | 0.013244341 | 0.042457359 | no |
| SLC22A6      | -0.137272668 | -2.490670374 | 0.013252174 | 0.042470238 | no |
| CDK20        | 0.137271701  | 2.490652502  | 0.013252828 | 0.042470238 | no |
| IKBKAP       | -0.137269544 | -2.490612609 | 0.013254287 | 0.042470238 | no |
| SUMF1        | 0.137258493  | 2.490408245  | 0.013261765 | 0.042484839 | no |
| FLJ30838     | -0.137256967 | -2.490380028 | 0.013262798 | 0.042484839 | no |
| TAF1D        | -0.137252847 | -2.490303839 | 0.013265586 | 0.042487372 | no |
| TWIST1       | 0.137249957  | 2.49025041   | 0.013267542 | 0.042487372 | no |
| HERC2P3      | -0.137243759 | -2.490135785 | 0.01327174  | 0.042494482 | no |
| P2RX6        | -0.137193328 | -2.489203218 | 0.013305932 | 0.042597615 | no |
| PHF21B       | -0.137167456 | -2.488724796 | 0.013323504 | 0.042647516 | no |
| C14orf37     | -0.137131884 | -2.488067015 | 0.013347697 | 0.042718593 | no |
| TMX1         | 0.137100035  | 2.487478102  | 0.01336939  | 0.042781649 | no |
| KANSL1       | -0.137094263 | -2.487371371 | 0.013373325 | 0.04278787  | no |
| MIER1        | -0.137086417 | -2.487226279 | 0.013378675 | 0.042798618 | no |
| MPP1         | 0.137057867  | 2.486698372  | 0.01339816  | 0.04285457  | no |
| OLFML1       | 0.137028551  | 2.486156298  | 0.013418193 | 0.042912261 | no |
| FAM217B      | -0.137016322 | -2.485930167 | 0.013426558 | 0.042932624 | no |
| AIFM3        | -0.136983789 | -2.485328624 | 0.013448833 | 0.042997453 | no |
| SLC26A4-AS1  | -0.136977446 | -2.485211346 | 0.01345318  | 0.042998975 | no |
| COQ6         | -0.136974799 | -2.485162406 | 0.013454994 | 0.042998975 | no |
| PRAF2        | 0.136974335  | 2.48515383   | 0.013455312 | 0.042998975 | no |
| NOA1         | -0.136951211 | -2.484726256 | 0.013471172 | 0.043043257 | no |
| CS           | -0.136918508 | -2.484121596 | 0.013493628 | 0.043108601 | no |
| FAM184B      | -0.136910524 | -2.483973968 | 0.013499116 | 0.043119723 | no |
| FN3KRP       | -0.136906287 | -2.483895631 | 0.013502028 | 0.043120598 | no |
| ANKRD42      | 0.136904289  | 2.483858684  | 0.013503402 | 0.043120598 | no |
| LOC100506368 | 0.136885823  | 2.483517252  | 0.013516106 | 0.043154751 | no |

|              |              |              |             |             |    |
|--------------|--------------|--------------|-------------|-------------|----|
| LRRC58       | -0.136880122 | -2.483411842 | 0.01352003  | 0.043155006 | no |
| MCF2L        | -0.136879872 | -2.483407221 | 0.013520202 | 0.043155006 | no |
| NPR2         | 0.136868062  | 2.483188872  | 0.013528333 | 0.043170967 | no |
| ZNF667       | -0.136866775 | -2.483165069 | 0.01352922  | 0.043170967 | no |
| STH          | -0.136851237 | -2.482877785 | 0.013539926 | 0.043198716 | no |
| H2BFM        | -0.136801626 | -2.481960528 | 0.013574159 | 0.043301507 | no |
| FST          | 0.136793339  | 2.481807322  | 0.013579884 | 0.043313342 | no |
| NEFM         | -0.136780293 | -2.481566106 | 0.013588903 | 0.043335675 | no |
| AATK-AS1     | -0.136757777 | -2.481149824 | 0.01360448  | 0.043378912 | no |
| EPHA6        | -0.136750283 | -2.481011262 | 0.013609668 | 0.043389018 | no |
| TBR1         | -0.136702372 | -2.480125485 | 0.013642876 | 0.043487012 | no |
| D2HGDH       | -0.136698819 | -2.480059787 | 0.013645342 | 0.043487012 | no |
| PARG         | -0.136695143 | -2.479991824 | 0.013647893 | 0.043487012 | no |
| SGTB         | -0.136694269 | -2.479975682 | 0.013648499 | 0.043487012 | no |
| FAM122A      | 0.136672035  | 2.47956462   | 0.01366394  | 0.043529756 | no |
| ADIPOR2      | -0.136657415 | -2.479294323 | 0.013674102 | 0.043549805 | no |
| ODF3L1       | 0.13665715   | 2.479289418  | 0.013674286 | 0.043549805 | no |
| CNIH3        | 0.136652396  | 2.479201527  | 0.013677592 | 0.043552472 | no |
| LOC731223    | 0.136650117  | 2.479159401  | 0.013679177 | 0.043552472 | no |
| CAMK2A       | -0.136638136 | -2.478937906 | 0.013687511 | 0.043572553 | no |
| PSMA5        | 0.136628819  | 2.478765651  | 0.013693996 | 0.043586741 | no |
| PDIK1L       | -0.136619039 | -2.478584841 | 0.013700806 | 0.043601959 | no |
| NGB          | -0.136615738 | -2.478523825 | 0.013703105 | 0.043602818 | no |
| SLC27A5      | -0.136604389 | -2.478314001 | 0.013711013 | 0.043621522 | no |
| COL4A2-AS1   | 0.136582975  | 2.47791813   | 0.013725943 | 0.043662559 | no |
| C11orf1      | -0.136540731 | -2.477137156 | 0.01375544  | 0.043749914 | no |
| MINPP1       | -0.136522997 | -2.476809312 | 0.01376784  | 0.043782871 | no |
| BIVM         | -0.136518216 | -2.476720936 | 0.013771184 | 0.043787026 | no |
| MEF2BNB-MEF2 | -0.136511737 | -2.476601158 | 0.013775717 | 0.043791431 | no |
| DDX52        | -0.136510412 | -2.476576665 | 0.013776645 | 0.043791431 | no |
| NAT8L        | -0.136485382 | -2.476113955 | 0.013794171 | 0.043840659 | no |
| SPAST        | -0.136480924 | -2.476031534 | 0.013797295 | 0.043844104 | no |
| SPRY1        | 0.136452459  | 2.475505336  | 0.013817255 | 0.043901039 | no |
| TIMM50       | -0.136422626 | -2.474953836 | 0.013838202 | 0.043961094 | no |
| ZNF670       | -0.136416174 | -2.474834568 | 0.013842736 | 0.043963385 | no |
| SLC32A1      | -0.136415777 | -2.474827233 | 0.013843015 | 0.043963385 | no |
| IL6          | 0.136405263  | 2.474632874  | 0.013850406 | 0.043980359 | no |
| C10orf95     | -0.136388726 | -2.474327177 | 0.013862038 | 0.044010793 | no |
| RGS9         | -0.136382524 | -2.474212521 | 0.013866403 | 0.044018148 | no |
| ATAT1        | -0.136378011 | -2.474129103 | 0.013869579 | 0.044021729 | no |
| TRPC1        | -0.136363524 | -2.473861295 | 0.013879782 | 0.044043645 | no |
| PDE4DIP      | -0.136362387 | -2.473840276 | 0.013880583 | 0.044043645 | no |
| SIX4         | -0.136341852 | -2.473460681 | 0.013895056 | 0.04408306  | no |
| GGN          | 0.136333056  | 2.473298086  | 0.01390126  | 0.044096232 | no |
| RMND1        | -0.136318584 | -2.473030579 | 0.013911471 | 0.044122112 | no |
| EP300        | -0.136310435 | -2.472879942 | 0.013917224 | 0.044133845 | no |
| SNAPC1       | 0.13621421   | 2.471101247  | 0.013985317 | 0.044343236 | no |
| CHMP2B       | 0.136189602  | 2.470646396  | 0.014002778 | 0.044392048 | no |
| F2RL2        | 0.136145887  | 2.469838373  | 0.014033843 | 0.044483969 | no |
| SUSD5        | -0.136125389 | -2.469459496 | 0.01404843  | 0.04452364  | no |
| PHACTR1      | -0.136116802 | -2.469300769 | 0.014054545 | 0.044536453 | no |

|           |              |              |             |             |    |
|-----------|--------------|--------------|-------------|-------------|----|
| FLJ37505  | 0.136105523  | 2.469092312  | 0.01406258  | 0.044555344 | no |
| TRMT1     | -0.136094273 | -2.468884359 | 0.014070599 | 0.044574181 | no |
| EEF1G     | -0.136018077 | -2.467476028 | 0.014125015 | 0.044739971 | no |
| SNORA6    | -0.135995964 | -2.467067323 | 0.014140842 | 0.044783501 | no |
| COL24A1   | 0.135980942  | 2.466789676  | 0.014151603 | 0.044810976 | no |
| ATP7A     | 0.135975979  | 2.466697961  | 0.014155159 | 0.044813769 | no |
| SIRT2     | -0.135973892 | -2.46665937  | 0.014156655 | 0.044813769 | no |
| PIAS2     | -0.135964447 | -2.466484819 | 0.014163426 | 0.044824795 | no |
| GOS2      | 0.135963215  | 2.466462049  | 0.01416431  | 0.044824795 | no |
| ZMYND12   | 0.135958815  | 2.46638072   | 0.014167466 | 0.044827708 | no |
| KRT18     | 0.135956085  | 2.466330269  | 0.014169424 | 0.044827708 | no |
| ZDHHC6    | 0.135953208  | 2.466277089  | 0.014171488 | 0.044827708 | no |
| METTL21EP | -0.135920598 | -2.46567438  | 0.014194901 | 0.04489516  | no |
| TAF15     | -0.135903633 | -2.465360839 | 0.014207094 | 0.044927114 | no |
| ATP8A2    | -0.135891962 | -2.465145146 | 0.014215488 | 0.044947043 | no |
| FBXO40    | -0.135882649 | -2.464973028 | 0.014222189 | 0.044961616 | no |
| APITD1    | 0.135858096  | 2.464519242  | 0.01423987  | 0.045010889 | no |
| HEXA-AS1  | 0.135809095  | 2.46361363   | 0.014275213 | 0.04511597  | no |
| HAPLN1    | -0.135800936 | -2.463462858 | 0.014281104 | 0.045127393 | no |
| MAPRE3    | -0.135798275 | -2.463413677 | 0.014283027 | 0.045127393 | no |
| GPC6      | 0.135775291  | 2.462988907  | 0.014299639 | 0.045173238 | no |
| AZI1      | -0.135750256 | -2.462526241 | 0.014317753 | 0.045223813 | no |
| ZNF219    | -0.13573908  | -2.462319697 | 0.014325846 | 0.045242725 | no |
| RCBTB1    | -0.135730534 | -2.462161769 | 0.014332036 | 0.045255626 | no |
| GLRA3     | -0.135724772 | -2.462055288 | 0.014336212 | 0.04526216  | no |
| RAPGEF4   | -0.135721345 | -2.461991943 | 0.014338696 | 0.045263355 | no |
| ZSWIM1    | -0.135693423 | -2.461475947 | 0.014358948 | 0.045312553 | no |
| PPA1      | -0.135693014 | -2.46146838  | 0.014359245 | 0.045312553 | no |
| ZNF81     | -0.135691138 | -2.461433715 | 0.014360607 | 0.045312553 | no |
| EIF2A     | -0.135685383 | -2.461327351 | 0.014364785 | 0.045316514 | no |
| KIF6      | -0.1356836   | -2.461294403 | 0.014366079 | 0.045316514 | no |
| SFXN4     | -0.135674616 | -2.461128391 | 0.014372603 | 0.04533044  | no |
| ZNF876P   | -0.135659149 | -2.46084255  | 0.014383842 | 0.04535923  | no |
| ANKRA2    | -0.135644646 | -2.460574546 | 0.014394387 | 0.045385824 | no |
| AKAP5     | -0.135633335 | -2.460365518 | 0.014402616 | 0.045405109 | no |
| CCDC174   | -0.135613008 | -2.459989878 | 0.014417415 | 0.045445096 | no |
| VARS      | -0.135606875 | -2.459876536 | 0.014421883 | 0.045452513 | no |
| HIPK4     | -0.135602129 | -2.459788838 | 0.014425341 | 0.045456745 | no |
| ICAM5     | -0.135592898 | -2.459618253 | 0.014432069 | 0.045471279 | no |
| TMEM159   | 0.135587862  | 2.45952519   | 0.014435741 | 0.045476181 | no |
| FBXO17    | -0.135575421 | -2.459295288 | 0.014444815 | 0.045497991 | no |
| CHD4      | -0.135570375 | -2.459202045 | 0.014448497 | 0.045497991 | no |
| NDUFAF3   | 0.135569664  | 2.459188908  | 0.014449015 | 0.045497991 | no |
| SNORA18   | -0.135550759 | -2.458839548 | 0.014462818 | 0.045526348 | no |
| CCNL1     | 0.135547589  | 2.458780975  | 0.014465133 | 0.045526348 | no |
| ZNF131    | -0.135546634 | -2.458763329 | 0.014465831 | 0.045526348 | no |
| REV3L     | -0.135545726 | -2.458746538 | 0.014466494 | 0.045526348 | no |
| CA11      | -0.135535683 | -2.458560959 | 0.014473833 | 0.045542772 | no |
| LAT       | 0.135525491  | 2.458372627  | 0.014481283 | 0.045559319 | no |
| EMR3      | 0.135520952  | 2.458288754  | 0.014484602 | 0.045559319 | no |
| CRYM      | -0.135518835 | -2.458249625 | 0.014486151 | 0.045559319 | no |

|              |              |              |             |             |    |
|--------------|--------------|--------------|-------------|-------------|----|
| JPX          | -0.135516876 | -2.458213424 | 0.014487584 | 0.045559319 | no |
| JRKL         | -0.135513995 | -2.458160196 | 0.014489691 | 0.045559319 | no |
| RWDD1        | -0.135507537 | -2.458040844 | 0.014494417 | 0.045567511 | no |
| DNASE1       | -0.135468269 | -2.457315223 | 0.014523177 | 0.04565125  | no |
| FADS6        | -0.135459682 | -2.457156565 | 0.014529472 | 0.045664359 | no |
| ACBD3        | 0.135433392  | 2.456670757  | 0.014548763 | 0.045718302 | no |
| NUPR1        | 0.135429763  | 2.45660371   | 0.014551427 | 0.045719989 | no |
| NOL8         | 0.135419599  | 2.456415892  | 0.014558893 | 0.045736758 | no |
| MBNL3        | 0.135414827  | 2.456327711  | 0.014562399 | 0.045741086 | no |
| RYR2         | -0.135408715 | -2.456214775 | 0.01456689  | 0.045748508 | no |
| PDZD7        | -0.135394435 | -2.455950907 | 0.014577389 | 0.045774791 | no |
| DNAJC25-GNG1 | 0.135306291  | 2.454322219  | 0.014642341 | 0.045972032 | no |
| DOCK4        | 0.13529792   | 2.454167543  | 0.014648523 | 0.045984722 | no |
| LINC00520    | 0.135294507  | 2.454104476  | 0.014651044 | 0.04598592  | no |
| LHFPL1       | -0.135281432 | -2.453862897 | 0.014660705 | 0.046009524 | no |
| PLCB4        | -0.135216928 | -2.452671053 | 0.014708451 | 0.046152625 | no |
| COX5B        | -0.135205823 | -2.452465886 | 0.014716684 | 0.046171717 | no |
| PEX12        | -0.135197265 | -2.452307748 | 0.014723033 | 0.046184892 | no |
| ATP1A1       | 0.13518827   | 2.452141553  | 0.014729707 | 0.046199087 | no |
| KCNMB1       | 0.135162685  | 2.45166885   | 0.014748707 | 0.046251927 | no |
| SETX         | 0.135158657  | 2.451594421  | 0.0147517   | 0.046254565 | no |
| BTAFL1       | -0.135101957 | -2.450546833 | 0.01479389  | 0.046380087 | no |
| FAM133A      | -0.135080548 | -2.450151294 | 0.014809848 | 0.046423343 | no |
| EIF3CL       | -0.135061202 | -2.449793866 | 0.014824281 | 0.046461808 | no |
| MRPS5        | -0.135054624 | -2.449672341 | 0.014829191 | 0.04647042  | no |
| SKOR1        | -0.13504822  | -2.449554014 | 0.014833973 | 0.046478629 | no |
| EPB49        | -0.135027633 | -2.449173674 | 0.014849354 | 0.046520039 | no |
| SLC6A7       | -0.135014379 | -2.448928796 | 0.014859264 | 0.046544301 | no |
| KCNJ12       | -0.134994313 | -2.448558087 | 0.014874278 | 0.046579227 | no |
| VPS36        | -0.134993684 | -2.448546462 | 0.014874749 | 0.046579227 | no |
| PPFIA4       | -0.134980256 | -2.448298378 | 0.014884805 | 0.046603924 | no |
| UBA5         | -0.134954096 | -2.447815083 | 0.014904411 | 0.046658512 | no |
| STRIP2       | -0.13490607  | -2.446927825 | 0.014940464 | 0.046764566 | no |
| SLC39A13     | 0.134890005  | 2.446631034  | 0.014952541 | 0.046795553 | no |
| NAV2-AS5     | -0.134883017 | -2.446501942 | 0.014957797 | 0.046805185 | no |
| PES1         | -0.134879645 | -2.446439656 | 0.014960333 | 0.046806307 | no |
| SHROOM3      | 0.134856798  | 2.446017574  | 0.014977532 | 0.046853295 | no |
| UTP20        | 0.134815913  | 2.445262277  | 0.015008351 | 0.046942872 | no |
| ZNF559       | -0.134810146 | -2.44515575  | 0.015012702 | 0.046949649 | no |
| MIER3        | -0.134805772 | -2.445074944 | 0.015016004 | 0.046953141 | no |
| LOC389332    | -0.134798276 | -2.444936462 | 0.015021663 | 0.0469579   | no |
| RERGL        | -0.134797968 | -2.444930773 | 0.015021896 | 0.0469579   | no |
| CYP4F22      | 0.134791487  | 2.444811048  | 0.01502679  | 0.046966368 | no |
| FBXL13       | 0.134787754  | 2.444742078  | 0.01502961  | 0.046968351 | no |
| QARS         | 0.134766035  | 2.444340861  | 0.015046025 | 0.047012812 | no |
| GABARAPL1    | -0.134754643 | -2.444130412 | 0.015054641 | 0.047032897 | no |
| BMS1P1       | -0.134705503 | -2.443222652 | 0.015091857 | 0.047142312 | no |
| PLK5         | -0.134692403 | -2.442980674 | 0.015101792 | 0.047166488 | no |
| RPAP1        | -0.134682778 | -2.442802862 | 0.015109095 | 0.047178223 | no |
| FLYWCH1      | -0.134681666 | -2.442782323 | 0.015109939 | 0.047178223 | no |
| RTN4RL1      | -0.134668097 | -2.442531674 | 0.015120241 | 0.047199223 | no |



|              |              |              |             |             |    |
|--------------|--------------|--------------|-------------|-------------|----|
| ZNF860       | 0.134667021  | 2.442511797  | 0.015121058 | 0.047199223 | no |
| CBX6         | -0.134663053 | -2.442438504 | 0.015124071 | 0.047201774 | no |
| DUS3L        | -0.134622726 | -2.441693562 | 0.015154731 | 0.047290594 | no |
| POLE2        | -0.134619535 | -2.441634633 | 0.015157159 | 0.047291303 | no |
| CYP4B1       | -0.134612734 | -2.441508998 | 0.015162335 | 0.047300588 | no |
| LINC00229    | 0.134606987  | 2.441402833  | 0.015166711 | 0.047307372 | no |
| PTGES3L      | -0.134599992 | -2.441273627 | 0.015172038 | 0.04731712  | no |
| HNRNPA0      | -0.134562624 | -2.440583384 | 0.015200524 | 0.047399082 | no |
| CNOT10       | -0.134554846 | -2.440439712 | 0.01520646  | 0.04741071  | no |
| C19orf73     | -0.134540441 | -2.440173629 | 0.015217457 | 0.047438116 | no |
| GLI3         | 0.134533013  | 2.440036418  | 0.015223131 | 0.047448921 | no |
| SLC18A2      | -0.134519369 | -2.439784384 | 0.015233558 | 0.047474535 | no |
| FAM98A       | 0.134514418  | 2.439692945  | 0.015237342 | 0.047479444 | no |
| KIAA1715     | -0.134500116 | -2.439428759 | 0.015248281 | 0.047506641 | no |
| EXT2         | 0.134485377  | 2.439156512  | 0.015259561 | 0.04753294  | no |
| ANK2         | -0.134483306 | -2.439118274 | 0.015261146 | 0.04753294  | no |
| SCO2         | 0.134404581  | 2.437664159  | 0.015321524 | 0.047707167 | no |
| FBX04        | 0.134402906  | 2.437633216  | 0.015322811 | 0.047707167 | no |
| MMP16        | -0.134401692 | -2.437610795 | 0.015323744 | 0.047707167 | no |
| PLIN3        | 0.134396431  | 2.437513621  | 0.015327786 | 0.047712842 | no |
| LYPD1        | 0.134380594  | 2.43722111   | 0.015339962 | 0.047743827 | no |
| GLB1L        | 0.134364937  | 2.436931919  | 0.015352008 | 0.047774399 | no |
| ANKFY1       | -0.134318185 | -2.436068419 | 0.015388025 | 0.04787955  | no |
| SLC05A1      | -0.134303567 | -2.435798436 | 0.015399302 | 0.047907701 | no |
| RPL21P28     | -0.13426838  | -2.435148542 | 0.015426476 | 0.047985295 | no |
| OSBPL2       | -0.134265443 | -2.435094297 | 0.015428747 | 0.047985411 | no |
| CAMK1D       | -0.134257145 | -2.434941033 | 0.015435162 | 0.047998418 | no |
| TUFM         | -0.134248153 | -2.434774961 | 0.015442116 | 0.048004546 | no |
| IFT74        | 0.134246488  | 2.4347442    | 0.015443405 | 0.048004546 | no |
| RCN1         | 0.134245933  | 2.434733396  | 0.015443834 | 0.048004546 | no |
| RDBP         | -0.134212149 | -2.434109999 | 0.01546999  | 0.048078894 | no |
| CHFR         | 0.13420653   | 2.434006228  | 0.015474344 | 0.048085472 | no |
| TDRD3        | -0.134166977 | -2.43327572  | 0.015505024 | 0.048173842 | no |
| PANK3        | -0.134162756 | -2.43319777  | 0.015508301 | 0.048177058 | no |
| TMEM127      | 0.134114709  | 2.432310425  | 0.015545647 | 0.048286095 | no |
| SNX29P2      | 0.134108644  | 2.432198402  | 0.015550367 | 0.048290419 | no |
| SLC6A9       | -0.134107146 | -2.432170743 | 0.015551533 | 0.048290419 | no |
| LCNL1        | -0.134099753 | -2.432034202 | 0.015557288 | 0.048301312 | no |
| IL22RA1      | 0.134077215  | 2.431617985  | 0.015574845 | 0.048348836 | no |
| CCDC64       | -0.134069117 | -2.431468429 | 0.015581158 | 0.048361447 | no |
| LOC100130950 | -0.134053406 | -2.431178269 | 0.015593412 | 0.048392492 | no |
| LOC642852    | -0.134039152 | -2.430915045 | 0.015604535 | 0.048420022 | no |
| VILL         | 0.134008178  | 2.430343017  | 0.015628733 | 0.048488106 | no |
| B4GALT3      | 0.133999458  | 2.430181986  | 0.015635551 | 0.048502257 | no |
| TPD52        | -0.133996377 | -2.430125097 | 0.015637961 | 0.048502729 | no |
| BAI2         | -0.133993309 | -2.430068438 | 0.015640361 | 0.048503173 | no |
| SPATA18      | 0.133936774  | 2.429024392  | 0.015684641 | 0.048627183 | no |
| RAPGEF6      | -0.133932945 | -2.428953681 | 0.015687644 | 0.048627183 | no |
| PYG02        | 0.133932232  | 2.428940521  | 0.015688203 | 0.048627183 | no |
| DDX19A       | 0.133930706  | 2.428912334  | 0.0156894   | 0.048627183 | no |
| LOC100288069 | -0.13391512  | -2.428624516 | 0.015701629 | 0.04865807  | no |

|              |              |              |             |             |    |
|--------------|--------------|--------------|-------------|-------------|----|
| COL20A1      | -0.133872516 | -2.427837757 | 0.015735103 | 0.048754771 | no |
| PNRC2        | 0.133844244  | 2.427315695  | 0.015757349 | 0.048816662 | no |
| PPARA        | -0.133813095 | -2.426740491 | 0.015781892 | 0.04888565  | no |
| EXOC7        | 0.133800456  | 2.426507098  | 0.01579186  | 0.048909477 | no |
| NMRAL1       | 0.133793605  | 2.426380588  | 0.015797265 | 0.048919169 | no |
| LRRC26       | -0.133777305 | -2.426079602 | 0.015810132 | 0.04895196  | no |
| BBX          | -0.13374982  | -2.425572071 | 0.01583185  | 0.049012142 | no |
| LOC440900    | 0.133744164  | 2.425467622  | 0.015836323 | 0.049018928 | no |
| TBRG4        | -0.133739399 | -2.425379639 | 0.015840092 | 0.049023532 | no |
| AIRE         | 0.133722324  | 2.425064343  | 0.015853603 | 0.049056549 | no |
| RSBN1L       | -0.133720148 | -2.425024169 | 0.015855325 | 0.049056549 | no |
| ZNF502       | -0.133689627 | -2.424460597 | 0.015879503 | 0.049124285 | no |
| LACE1        | -0.133683037 | -2.4243389   | 0.015884729 | 0.049133377 | no |
| ISG20L2      | 0.133675905  | 2.424207212  | 0.015890385 | 0.049143799 | no |
| SNORA47      | -0.133659114 | -2.423897169 | 0.015903708 | 0.049177927 | no |
| ZCRB1        | -0.133651488 | -2.423756354 | 0.015909763 | 0.049189571 | no |
| B3GAT2       | -0.133643982 | -2.423617767 | 0.015915723 | 0.049200922 | no |
| TRIM26       | 0.133574652  | 2.422337623  | 0.015970876 | 0.049364317 | no |
| ERLEC1       | 0.133570417  | 2.422259421  | 0.015974251 | 0.049367647 | no |
| FBLN7        | 0.133555037  | 2.421975448  | 0.01598651  | 0.049398431 | no |
| METTL3       | -0.133541718 | -2.421729539 | 0.015997133 | 0.04942415  | no |
| ERN1         | 0.133509171  | 2.421128594  | 0.01602312  | 0.049497321 | no |
| VN1R2        | -0.133465417 | -2.420320745 | 0.016058112 | 0.049598287 | no |
| UGT8         | -0.133449398 | -2.420024967 | 0.01607094  | 0.049630777 | no |
| LOC100288637 | 0.133441755  | 2.419883869  | 0.016077063 | 0.049642553 | no |
| LOC100128714 | -0.133399774 | -2.419108769 | 0.016110736 | 0.049727207 | no |
| EPB41L5      | -0.133398931 | -2.419093196 | 0.016111413 | 0.049727207 | no |
| TLN2         | -0.133398921 | -2.419093012 | 0.016111421 | 0.049727207 | no |
| CWF19L2      | -0.133394449 | -2.419010451 | 0.016115011 | 0.049731147 | no |
| LAPTM4B      | -0.13338154  | -2.418772116 | 0.01612538  | 0.049749837 | no |
| OSGIN1       | 0.13338005   | 2.418744614  | 0.016126577 | 0.049749837 | no |
| CTSF         | -0.133378264 | -2.418711629 | 0.016128012 | 0.049749837 | no |
| CHST1        | -0.133340076 | -2.418006578 | 0.016158725 | 0.049837421 | no |
| WDR18        | -0.133333305 | -2.417881569 | 0.016164175 | 0.049847079 | no |
| ZNRF1        | -0.133307701 | -2.417408868 | 0.016184801 | 0.049902196 | no |
| CXorf36      | 0.133305355  | 2.417365558  | 0.016186692 | 0.049902196 | no |
| DMTF1        | -0.13326912  | -2.416696581 | 0.016215926 | 0.049985149 | no |
| HRH2         | 0.13323724   | 2.416108026  | 0.016241683 | 0.050057366 | no |
| MTHFD1       | -0.133186359 | -2.415168694 | 0.016282867 | 0.050177099 | no |
| TNC          | 0.133172994  | 2.414921953  | 0.0162937   | 0.050203284 | no |
| SAPCD2       | -0.133169108 | -2.414850224 | 0.01629685  | 0.050205793 | no |
| SSBP3        | -0.133161197 | -2.414704176 | 0.016303267 | 0.050218361 | no |
| MDFI         | -0.133157291 | -2.41463207  | 0.016306435 | 0.050220923 | no |
| COLQ         | 0.133138646  | 2.414287867  | 0.016321569 | 0.050260329 | no |
| STK16        | -0.133111648 | -2.413789459 | 0.016343504 | 0.050320666 | no |
| C12orf5      | 0.133106636  | 2.413696927  | 0.016347579 | 0.050326003 | no |
| C9orf43      | -0.133086616 | -2.413327344 | 0.016363865 | 0.050368924 | no |
| C15orf48     | 0.133077804  | 2.413164679  | 0.016371038 | 0.050379114 | no |
| LHFPL5       | -0.133076789 | -2.413145942 | 0.016371864 | 0.050379114 | no |
| ALDH1L2      | -0.133067804 | -2.412980066 | 0.016379181 | 0.050394415 | no |
| EDC4         | -0.133063133 | -2.412893841 | 0.016382986 | 0.050398906 | no |

|              |              |              |             |             |    |
|--------------|--------------|--------------|-------------|-------------|----|
| HCAR3        | 0.133048333  | 2.412620638  | 0.016395047 | 0.05042834  | no |
| DKFZp451B082 | -0.133045634 | -2.412570813 | 0.016397247 | 0.05042834  | no |
| METAP1D      | -0.133021963 | -2.412133836 | 0.016416556 | 0.050480499 | no |
| PLD3         | 0.133013973  | 2.411986349  | 0.016423078 | 0.050493328 | no |
| SEZ6L2       | -0.132990528 | -2.411553553 | 0.016442228 | 0.050544976 | no |
| CASC2        | 0.132967503  | 2.41112852   | 0.016461055 | 0.050595613 | no |
| NPPA         | -0.132930995 | -2.410454608 | 0.016490944 | 0.050680233 | no |
| FLT4         | 0.132925198  | 2.410347601  | 0.016495694 | 0.050687584 | no |
| SNX22        | -0.132920142 | -2.410254267 | 0.016499838 | 0.05069307  | no |
| HIST1H4E     | -0.132883827 | -2.40958393  | 0.016529631 | 0.050777343 | no |
| SPSB2        | 0.132873048  | 2.409384959  | 0.016538483 | 0.050797275 | no |
| GOLGA4       | 0.132849646  | 2.408952977  | 0.016557716 | 0.050849081 | no |
| CYP2B7P1     | -0.132829408 | -2.408579421 | 0.016574364 | 0.050892934 | no |
| SESN1        | -0.132803414 | -2.4080996   | 0.016595769 | 0.05095138  | no |
| IL1RAPL2     | -0.132789672 | -2.407845953 | 0.016607094 | 0.050978868 | no |
| SLC6A12      | -0.132776686 | -2.407606248 | 0.016617803 | 0.051004456 | no |
| GPR27        | -0.132760002 | -2.407298299 | 0.01663157  | 0.05103942  | no |
| ASPSCR1      | -0.132750518 | -2.407123243 | 0.0166394   | 0.05105616  | no |
| MGC16275     | -0.132744117 | -2.407005096 | 0.016644686 | 0.05106509  | no |
| SYT9         | -0.132738242 | -2.406896662 | 0.01664954  | 0.051071493 | no |
| MYCNOS       | -0.132735838 | -2.406852283 | 0.016651526 | 0.051071493 | no |
| MAL2         | -0.132697252 | -2.406140065 | 0.016683438 | 0.051162067 | no |
| GPR108       | 0.132687931  | 2.405968033  | 0.016691154 | 0.051178427 | no |
| APEX1        | -0.132681207 | -2.405843929 | 0.016696723 | 0.051188198 | no |
| TSTD2        | -0.132675099 | -2.405731183 | 0.016701783 | 0.051193246 | no |
| EWSR1        | -0.132670148 | -2.405639793 | 0.016705886 | 0.051193246 | no |
| ACSM2B       | 0.13266817   | 2.405603286  | 0.016707525 | 0.051193246 | no |
| ERC2-IT1     | -0.13266772  | -2.405594982 | 0.016707898 | 0.051193246 | no |
| ERCC6L2      | -0.132659539 | -2.405443991 | 0.016714679 | 0.051206722 | no |
| FBXO39       | 0.132623949  | 2.404787097  | 0.016744208 | 0.051288113 | no |
| KBTBD3       | -0.132621768 | -2.404746848 | 0.016746019 | 0.051288113 | no |
| RNASE1       | 0.13261646   | 2.404648868  | 0.016750428 | 0.051294306 | no |
| SIRPB1       | 0.132595416  | 2.404260456  | 0.016767915 | 0.051340542 | no |
| ARHGAP22     | 0.132584003  | 2.404049821  | 0.016777406 | 0.051362282 | no |
| IFITM10      | -0.132566489 | -2.403726564 | 0.016791979 | 0.051399576 | no |
| ATPAF1       | -0.13252948  | -2.403043515 | 0.016822811 | 0.051486617 | no |
| SEMA5B       | -0.132498564 | -2.40247292  | 0.016848604 | 0.051558216 | no |
| MAMDC2       | 0.13249528   | 2.402412321  | 0.016851346 | 0.051559264 | no |
| LAMB3        | 0.132491632  | 2.402344979  | 0.016854392 | 0.051561245 | no |
| RAPGEF4-AS1  | -0.132486773 | -2.402255311 | 0.01685845  | 0.051566319 | no |
| ELMOD3       | 0.13248338   | 2.402192691  | 0.016861285 | 0.051566925 | no |
| FBXW5        | 0.132480792  | 2.402144915  | 0.016863447 | 0.051566925 | no |
| SLC25A11     | -0.13244388  | -2.401463673 | 0.016894312 | 0.051653957 | no |
| ZNF408       | -0.132434136 | -2.401283848 | 0.016902468 | 0.051671542 | no |
| SMAD6        | 0.132424588  | 2.40110764   | 0.016910463 | 0.05168863  | no |
| LOC100128164 | -0.132407697 | -2.400795897 | 0.016924616 | 0.051724533 | no |
| MAGEA12      | 0.132379214  | 2.40027025   | 0.016948503 | 0.05178555  | no |
| MIR181A2HG   | -0.132378145 | -2.400250518 | 0.0169494   | 0.05178555  | no |
| HNRPDL       | -0.132368183 | -2.400066671 | 0.016957762 | 0.051803734 | no |
| SGCZ         | -0.132358779 | -2.399893104 | 0.01696566  | 0.051817456 | no |
| TRIOBP       | -0.132357092 | -2.39986198  | 0.016967076 | 0.051817456 | no |

|              |              |              |             |             |    |
|--------------|--------------|--------------|-------------|-------------|----|
| AKR1E2       | 0.132339072  | 2.399529424  | 0.016982219 | 0.051851508 | no |
| PRKAB2       | -0.132338081 | -2.399511139 | 0.016983052 | 0.051851508 | no |
| DSCAM-IT1    | -0.132333285 | -2.399422629 | 0.016987084 | 0.051856331 | no |
| RAB1A        | 0.132330463  | 2.399370548  | 0.016989457 | 0.051856331 | no |
| DLGAP1-AS1   | 0.132285449  | 2.398539824  | 0.017027349 | 0.051964608 | no |
| WTH3DI       | -0.13226392  | -2.398142511 | 0.017045499 | 0.05201261  | no |
| PPM1F        | 0.132255948  | 2.397995406  | 0.017052223 | 0.052025741 | no |
| DSCAM        | -0.132245541 | -2.397803354 | 0.017061005 | 0.052045146 | no |
| HMGXB4       | -0.132225842 | -2.397439813 | 0.017077639 | 0.052088497 | no |
| PCP4L1       | -0.132218983 | -2.397313249 | 0.017083434 | 0.052097576 | no |
| HNRNPK       | -0.13221658  | -2.397268908 | 0.017085464 | 0.052097576 | no |
| LOC79015     | -0.132176628 | -2.396531637 | 0.017119258 | 0.052193214 | no |
| KIFC2        | -0.132138168 | -2.39582191  | 0.017151844 | 0.052285146 | no |
| ST7-AS1      | -0.132111376 | -2.395327502 | 0.017174576 | 0.05233943  | no |
| EPN3         | -0.132107053 | -2.39524773  | 0.017178247 | 0.05233943  | no |
| RUNX1T1      | -0.132106998 | -2.395246723 | 0.017178293 | 0.05233943  | no |
| NXPH2        | -0.132105703 | -2.395222816 | 0.017179393 | 0.05233943  | no |
| EXOSC5       | -0.132076751 | -2.394688568 | 0.017203993 | 0.052406948 | no |
| SKINTL       | 0.132073752  | 2.394633229  | 0.017206543 | 0.052407287 | no |
| AKAP9        | -0.132047657 | -2.394151698 | 0.017228745 | 0.052466516 | no |
| LOC154092    | 0.132045159  | 2.394105605  | 0.017230872 | 0.052466516 | no |
| GRIN2D       | -0.132035896 | -2.393934684 | 0.01723876  | 0.052483097 | no |
| TBCC         | -0.132018433 | -2.393612453 | 0.017253639 | 0.052515688 | no |
| FAM27B       | -0.132017597 | -2.393597016 | 0.017254352 | 0.052515688 | no |
| LOC100507373 | -0.132011814 | -2.393490305 | 0.017259282 | 0.052523255 | no |
| TINAGL1      | 0.132007558  | 2.393411774  | 0.017262911 | 0.052526861 | no |
| LCAT         | -0.131989848 | -2.393084992 | 0.017278019 | 0.052565388 | no |
| MTRNR2L5     | -0.131956808 | -2.392475324 | 0.017306236 | 0.052643782 | no |
| CISD1        | -0.131948816 | -2.392327847 | 0.017313068 | 0.052657111 | no |
| CRH          | -0.131878903 | -2.391037837 | 0.017372929 | 0.052831698 | no |
| CLDN14       | 0.131867598  | 2.390829248  | 0.017382625 | 0.052853706 | no |
| KIAA1704     | -0.131864167 | -2.390765935 | 0.017385569 | 0.05285484  | no |
| MED24        | -0.131861431 | -2.390715456 | 0.017387917 | 0.05285484  | no |
| PCDHAC2      | -0.131842094 | -2.390358669 | 0.017404517 | 0.052895122 | no |
| PDE10A       | -0.131840262 | -2.390324862 | 0.017406091 | 0.052895122 | no |
| GCLC         | -0.131813269 | -2.389826808 | 0.01742929  | 0.052958133 | no |
| RFFL         | 0.131776463  | 2.389147712  | 0.017460966 | 0.053046878 | no |
| CD59         | 0.131756228  | 2.388774354  | 0.017478402 | 0.053092346 | no |
| CDNF         | -0.131745183 | -2.388570585 | 0.017487925 | 0.053113123 | no |
| PUM2         | -0.131742563 | -2.388522237 | 0.017490185 | 0.053113123 | no |
| SALL3        | -0.131731156 | -2.388311771 | 0.017500027 | 0.053135502 | no |
| RRP8         | 0.131710297  | 2.387926915  | 0.017518036 | 0.053182669 | no |
| SGIP1        | -0.1317052   | -2.387832885 | 0.017522439 | 0.053188521 | no |
| ZBED3        | -0.131684118 | -2.387443918 | 0.017540661 | 0.053236314 | no |
| PABPC1L2B    | -0.131633892 | -2.386517246 | 0.01758414  | 0.05336074  | no |
| KATNBL1      | -0.131615627 | -2.386180274 | 0.017599975 | 0.053398469 | no |
| KIF21A       | -0.131613819 | -2.386146914 | 0.017601543 | 0.053398469 | no |
| SLC5A2       | -0.131601236 | -2.385914758 | 0.01761246  | 0.053422535 | no |
| TMEM65       | -0.131598946 | -2.385872512 | 0.017614447 | 0.053422535 | no |
| ALG6         | 0.131581027  | 2.385541912  | 0.017630005 | 0.053462177 | no |
| LOC440894    | -0.131560408 | -2.38516152  | 0.017647922 | 0.053508153 | no |

|              |              |              |             |             |    |
|--------------|--------------|--------------|-------------|-------------|----|
| SC01         | 0.131557849  | 2.385114313  | 0.017650147 | 0.053508153 | no |
| LOC100506233 | -0.13151818  | -2.384382463 | 0.017684666 | 0.05360524  | no |
| RBM41        | -0.13150649  | -2.384166789 | 0.01769485  | 0.053628545 | no |
| ZHX3         | -0.131492085 | -2.383901037 | 0.017707405 | 0.053653336 | no |
| ZC3H18       | -0.131491377 | -2.383887978 | 0.017708023 | 0.053653336 | no |
| DDX26B       | 0.131479697  | 2.383672501  | 0.017718209 | 0.053676633 | no |
| TP53         | -0.13146735  | -2.38344471  | 0.017728983 | 0.053701703 | no |
| MIR3942      | 0.131456155  | 2.383238179  | 0.017738757 | 0.053715485 | no |
| IGSF1        | -0.131454073 | -2.383199781 | 0.017740575 | 0.053715485 | no |
| GPR152       | 0.13145355   | 2.383190127  | 0.017741032 | 0.053715485 | no |
| CPXCR1       | 0.131437415  | 2.382892464  | 0.017755128 | 0.053750593 | no |
| NTN4         | -0.131415363 | -2.382485641 | 0.01777441  | 0.053789464 | no |
| SERPINI1     | -0.131414794 | -2.382475141 | 0.017774908 | 0.053789464 | no |
| C1orf115     | -0.131414143 | -2.38246314  | 0.017775477 | 0.053789464 | no |
| PCDHGA1      | -0.131388914 | -2.381997707 | 0.01779756  | 0.053848707 | no |
| C7orf73      | 0.131313455  | 2.380605684  | 0.017863751 | 0.054041368 | no |
| ERO1LB       | -0.131304779 | -2.380445641 | 0.017871375 | 0.054054033 | no |
| SETDB1       | -0.131302967 | -2.380412213 | 0.017872968 | 0.054054033 | no |
| SNORA57      | -0.131254874 | -2.379525037 | 0.017915286 | 0.054174393 | no |
| OR2H2        | -0.131220973 | -2.378899678 | 0.017945168 | 0.05425712  | no |
| PDCD7        | -0.131195047 | -2.378421425 | 0.017968051 | 0.054318663 | no |
| FITM2        | -0.13117737  | -2.37809535  | 0.017983667 | 0.054358225 | no |
| ACTR1B       | -0.131160265 | -2.377779826 | 0.017998789 | 0.054396283 | no |
| APOD         | 0.131140036  | 2.377406681  | 0.018016687 | 0.054442719 | no |
| INSM1        | -0.131084526 | -2.376382763 | 0.018065881 | 0.054583697 | no |
| RNF114       | 0.131073903  | 2.376186821  | 0.018075308 | 0.054604504 | no |
| FNBP1L       | 0.131068338  | 2.376084155  | 0.018080249 | 0.054611755 | no |
| RPRML        | -0.131061488 | -2.375957819 | 0.018086331 | 0.054622449 | no |
| POLRMT       | -0.131014897 | -2.37509843  | 0.018127753 | 0.054739853 | no |
| TAAR3        | -0.131007408 | -2.374960292 | 0.018134419 | 0.054750539 | no |
| LOC158376    | 0.131002536  | 2.374870431  | 0.018138756 | 0.054750539 | no |
| C1QBP        | -0.131002336 | -2.374866737 | 0.018138934 | 0.054750539 | no |
| SPTSSA       | 0.130986658  | 2.374577568  | 0.018152898 | 0.054782526 | no |
| ZNF777       | -0.130984715 | -2.374541717 | 0.01815463  | 0.054782526 | no |
| FANCF        | 0.130975909  | 2.374379305  | 0.018162478 | 0.054798512 | no |
| FLJ37453     | -0.130967841 | -2.374230495 | 0.018169671 | 0.05481252  | no |
| C3orf18      | -0.130957088 | -2.374032149 | 0.018179262 | 0.054833757 | no |
| SOWAHA       | -0.130949566 | -2.373893417 | 0.018185973 | 0.054846302 | no |
| SNX2         | 0.130944858  | 2.373806567  | 0.018190176 | 0.054851279 | no |
| TNPO3        | -0.130908552 | -2.37313693  | 0.018222607 | 0.054941364 | no |
| PLXNB1       | -0.130904909 | -2.373069741 | 0.018225864 | 0.054943475 | no |
| VTN          | -0.130873916 | -2.372498106 | 0.018253593 | 0.055011973 | no |
| CSGALNACT2   | 0.130873791  | 2.372495794  | 0.018253705 | 0.055011973 | no |
| PPP1R1A      | -0.13086536  | -2.37234029  | 0.018261255 | 0.05502701  | no |
| WBP1         | -0.13083941  | -2.371861674 | 0.018284509 | 0.055089358 | no |
| CEP170B      | -0.130829142 | -2.371672301 | 0.018293718 | 0.055109376 | no |
| SMARCA4      | -0.130779602 | -2.37075861  | 0.018338203 | 0.055233916 | no |
| NKX2-2       | -0.130776473 | -2.370700897 | 0.018341016 | 0.055233916 | no |
| ESAM         | 0.130774523  | 2.370664923  | 0.01834277  | 0.055233916 | no |
| CHGA         | -0.130737264 | -2.369977758 | 0.018376296 | 0.055327119 | no |
| C14orf166    | 0.130687084  | 2.369052297  | 0.018421533 | 0.05545555  | no |

|           |              |              |             |             |    |
|-----------|--------------|--------------|-------------|-------------|----|
| NUFIP2    | 0.130678908  | 2.368901506  | 0.018428914 | 0.055469997 | no |
| SNHG10    | -0.130672897 | -2.368790656 | 0.01843434  | 0.055473315 | no |
| PHF3      | -0.13067197  | -2.368773547 | 0.018435178 | 0.055473315 | no |
| PDHB      | -0.130615372 | -2.367729759 | 0.018486351 | 0.05561951  | no |
| ETV7      | 0.130605342  | 2.367544774  | 0.018495433 | 0.055639046 | no |
| LCN9      | -0.130591335 | -2.367286457 | 0.018508122 | 0.055669425 | no |
| GRM3      | -0.130556714 | -2.366647995 | 0.018539517 | 0.055755054 | no |
| REST      | 0.130553309  | 2.36658519   | 0.018542607 | 0.055755054 | no |
| CREBBP    | -0.130551363 | -2.366549313 | 0.018544373 | 0.055755054 | no |
| YIPF5     | 0.130548173  | 2.366490477  | 0.018547269 | 0.055755961 | no |
| FCN3      | 0.130534611  | 2.366240373  | 0.018559585 | 0.055778778 | no |
| NUDT2     | -0.130534099 | -2.366230927 | 0.01856005  | 0.055778778 | no |
| CRYGA     | -0.130515258 | -2.365883476 | 0.018577172 | 0.055822427 | no |
| C17orf104 | -0.130503883 | -2.365673699 | 0.018587516 | 0.055845701 | no |
| ZDHHC20   | 0.130478369  | 2.365203197  | 0.018610734 | 0.055907645 | no |
| TMEM108   | -0.130466722 | -2.364988412 | 0.018621342 | 0.055928262 | no |
| XAF1      | 0.130465119  | 2.364958858  | 0.018622802 | 0.055928262 | no |
| SLC29A2   | -0.130442902 | -2.364549156 | 0.018643053 | 0.055981255 | no |
| DSTN      | 0.130432655  | 2.364360177  | 0.0186524   | 0.056000834 | no |
| ZNF623    | -0.130430041 | -2.364311982 | 0.018654784 | 0.056000834 | no |
| PYDC1     | -0.130418336 | -2.364096133 | 0.018665467 | 0.05602015  | no |
| TNIK      | 0.130417279  | 2.364076637  | 0.018666432 | 0.05602015  | no |
| DNAJC14   | 0.130411057  | 2.363961905  | 0.018672113 | 0.056029374 | no |
| SH3BGR2   | -0.130406892 | -2.363885103 | 0.018675916 | 0.056032963 | no |
| FAM101A   | -0.130383508 | -2.363453878 | 0.018697284 | 0.056089243 | no |
| MRPS33    | -0.130367626 | -2.363161015 | 0.018711809 | 0.056120144 | no |
| NCOA1     | -0.130366534 | -2.363140881 | 0.018712808 | 0.056120144 | no |
| ZZZ3      | 0.130336196  | 2.362581444  | 0.018740581 | 0.056195596 | no |
| GMFB      | -0.130317554 | -2.362237672 | 0.018757666 | 0.05623898  | no |
| CEP55     | 0.130308244  | 2.362066003  | 0.018766203 | 0.056256726 | no |
| SHISA9    | -0.130298192 | -2.361880644 | 0.018775424 | 0.05627652  | no |
| PANK4     | -0.130286362 | -2.361662512 | 0.018786281 | 0.056301209 | no |
| DPM3      | -0.130276047 | -2.361472302 | 0.018795753 | 0.056321741 | no |
| ATXN10    | -0.130264075 | -2.361251533 | 0.018806752 | 0.056346842 | no |
| DDO       | 0.130255404  | 2.361091659  | 0.01881472  | 0.056362859 | no |
| ARL4D     | -0.130214448 | -2.360336451 | 0.018852401 | 0.056467867 | no |
| PALM      | -0.130207141 | -2.360201708 | 0.018859131 | 0.05647477  | no |
| RPS3A     | -0.130206239 | -2.360185089 | 0.018859961 | 0.05647477  | no |
| PDPR      | -0.13018758  | -2.359841036 | 0.018877156 | 0.056518383 | no |
| GPR161    | -0.130167264 | -2.359466426 | 0.018895893 | 0.056566602 | no |
| CNOT8     | -0.130159192 | -2.359317591 | 0.018903342 | 0.056581019 | no |
| CDC27     | 0.130150913  | 2.359164929  | 0.018910985 | 0.056594646 | no |
| EPN2      | -0.130148556 | -2.359121474 | 0.018913161 | 0.056594646 | no |
| HOXB3     | 0.13012019   | 2.358598444  | 0.01893937  | 0.056665183 | no |
| ZXDA      | -0.130114591 | -2.358495208 | 0.018944547 | 0.056672782 | no |
| PTER      | 0.13007561   | 2.357776461  | 0.018980625 | 0.056772806 | no |
| SCARB1    | 0.130043914  | 2.357192047  | 0.019010004 | 0.056852769 | no |
| PAQR6     | -0.130006552 | -2.356503178 | 0.019044686 | 0.05694477  | no |
| SV2B      | -0.130005066 | -2.35647578  | 0.019046066 | 0.05694477  | no |
| SERTM1    | -0.129994967 | -2.356289579 | 0.019055451 | 0.056961181 | no |
| SRRD      | -0.129993455 | -2.356261701 | 0.019056856 | 0.056961181 | no |

|              |              |              |             |             |    |
|--------------|--------------|--------------|-------------|-------------|----|
| IQCE         | 0.129984037  | 2.35608805   | 0.019065612 | 0.056979429 | no |
| ZW10         | 0.129971199  | 2.355851349  | 0.019077553 | 0.057007189 | no |
| KRT8         | 0.129948734  | 2.355437165  | 0.019098464 | 0.057060593 | no |
| TMEM41B      | -0.129946295 | -2.355392198 | 0.019100736 | 0.057060593 | no |
| DHDDS        | 0.129941915  | 2.355311446  | 0.019104815 | 0.057064848 | no |
| OPRD1        | -0.129924167 | -2.35498421  | 0.019121355 | 0.057106316 | no |
| PTBP1        | 0.129909584  | 2.354715357  | 0.019134954 | 0.057138988 | no |
| EFCAB5       | -0.129905929 | -2.354647965 | 0.019138364 | 0.057141231 | no |
| DLGAP2       | -0.129875435 | -2.35408574  | 0.019166833 | 0.057218281 | no |
| TMIGD2       | 0.129849403  | 2.35360581   | 0.019191164 | 0.05728296  | no |
| CD99L2       | -0.129781524 | -2.352354376 | 0.019254737 | 0.057462776 | no |
| LSM3         | -0.129776787 | -2.352267042 | 0.01925918  | 0.057462776 | no |
| LOC283683    | -0.129776523 | -2.352262167 | 0.019259428 | 0.057462776 | no |
| FGF17        | -0.129773174 | -2.352200422 | 0.019262571 | 0.057464173 | no |
| PPP1R3D      | 0.129765926  | 2.352066813  | 0.019269371 | 0.057476483 | no |
| AQP1         | 0.129755935  | 2.351882623  | 0.01927875  | 0.057489107 | no |
| SUPT5H       | -0.129755718 | -2.351878621 | 0.019278954 | 0.057489107 | no |
| NOMO3        | -0.129747389 | -2.35172506  | 0.019286776 | 0.057504454 | no |
| USP37        | -0.129732884 | -2.35145766  | 0.019300404 | 0.057537103 | no |
| HTR1E        | -0.129721047 | -2.351239431 | 0.019311532 | 0.057558483 | no |
| SFPQ         | -0.129717638 | -2.351176591 | 0.019314737 | 0.057558483 | no |
| NHLRC4       | 0.12971671   | 2.351159474  | 0.01931561  | 0.057558483 | no |
| PON3         | -0.129697195 | -2.3507997   | 0.019333972 | 0.057605211 | no |
| DYNC1I1      | -0.129680856 | -2.350498494 | 0.019349356 | 0.057643056 | no |
| EIF5B        | -0.129654616 | -2.350014745 | 0.019374086 | 0.057708729 | no |
| RBBP6        | -0.129636299 | -2.349677084 | 0.019391364 | 0.05775219  | no |
| LOC100507377 | -0.129631789 | -2.34959394  | 0.019395621 | 0.057756864 | no |
| TBC1D4       | -0.129614163 | -2.349268999 | 0.019412264 | 0.057791317 | no |
| MRM1         | -0.12961384  | -2.349263051 | 0.019412569 | 0.057791317 | no |
| LINC00643    | -0.129572554 | -2.348501952 | 0.019451602 | 0.057896545 | no |
| PPP6R3       | -0.129570755 | -2.348468791 | 0.019453304 | 0.057896545 | no |
| BCM01        | 0.129554332  | 2.348166046  | 0.01946885  | 0.057934791 | no |
| OSBP         | -0.129508933 | -2.34732915  | 0.019511883 | 0.058054808 | no |
| C3orf33      | -0.129482761 | -2.346846699 | 0.019536729 | 0.058120686 | no |
| GALNTL1      | -0.129477541 | -2.34675048  | 0.019541687 | 0.05812739  | no |
| LOC100506474 | 0.129473215  | 2.346670727  | 0.019545798 | 0.058131572 | no |
| C12orf49     | 0.129467643  | 2.346568008  | 0.019551093 | 0.058139276 | no |
| HNRNPL       | -0.129463515 | -2.346491926 | 0.019555016 | 0.058142897 | no |
| KIAA0586     | -0.129457692 | -2.346384573 | 0.019560553 | 0.058151314 | no |
| CBLN1        | -0.129446534 | -2.346178891 | 0.019571165 | 0.058174815 | no |
| CADM4        | -0.129427115 | -2.345820938 | 0.019589646 | 0.058218331 | no |
| EFCAB2       | -0.129425458 | -2.345790404 | 0.019591223 | 0.058218331 | no |
| C18orf42     | -0.129393011 | -2.345192284 | 0.019622139 | 0.058302142 | no |
| TP53RK       | 0.129378991  | 2.34493385   | 0.01963551  | 0.058327431 | no |
| MGC2889      | -0.129378395 | -2.344922875 | 0.019636078 | 0.058327431 | no |
| MICALCL      | 0.12933573   | 2.344136426  | 0.01967682  | 0.058440372 | no |
| SYT7         | -0.129327123 | -2.343977781 | 0.019685047 | 0.058456729 | no |
| ZNF582-AS1   | -0.129312643 | -2.34371087  | 0.019698896 | 0.058489773 | no |
| GJA5         | 0.129308677  | 2.343637763  | 0.019702691 | 0.058492959 | no |
| WAC          | -0.129269155 | -2.342909278 | 0.019740539 | 0.058597227 | no |
| KCNK12       | -0.129260869 | -2.342756553 | 0.019748482 | 0.058612709 | no |

|              |              |              |             |             |    |
|--------------|--------------|--------------|-------------|-------------|----|
| LOC100170939 | -0.129239527 | -2.34236318  | 0.019768953 | 0.058665365 | no |
| EAF2         | 0.129226604  | 2.342124985  | 0.019781358 | 0.058694072 | no |
| DCAKD        | -0.12918184  | -2.341299893 | 0.01982438  | 0.058813605 | no |
| LINC00471    | -0.12917779  | -2.341225257 | 0.019828276 | 0.058817043 | no |
| S100A12      | 0.129160173  | 2.340900535  | 0.019845233 | 0.05885922  | no |
| DCDC2B       | 0.129137868  | 2.340489422  | 0.01986672  | 0.058914817 | no |
| CBX7         | -0.129134921 | -2.340435108 | 0.01986956  | 0.05891511  | no |
| KIAA1239     | -0.12912537  | -2.340259071 | 0.019878768 | 0.058934282 | no |
| NR2F1        | -0.129111457 | -2.340002634 | 0.019892188 | 0.058965934 | no |
| HIP1         | -0.129101612 | -2.339821194 | 0.019901689 | 0.058985959 | no |
| ZNF394       | 0.129093957  | 2.339680092  | 0.019909079 | 0.058999727 | no |
| C1QTNF9B-AS1 | 0.129082831  | 2.339475042  | 0.019919824 | 0.05902343  | no |
| PPP3R1       | -0.129075655 | -2.339342776 | 0.019926757 | 0.059035834 | no |
| EMX2         | -0.129069807 | -2.339234997 | 0.019932409 | 0.059044438 | no |
| PERP         | 0.12905501   | 2.338962263  | 0.019946716 | 0.059078675 | no |
| COQ5         | -0.129050837 | -2.33888536  | 0.019950752 | 0.059082486 | no |
| NME7         | 0.129042883  | 2.338738764  | 0.019958447 | 0.059084959 | no |
| 38231        | -0.129042432 | -2.338730444 | 0.019958884 | 0.059084959 | no |
| USF1         | 0.129041449  | 2.338712332  | 0.019959835 | 0.059084959 | no |
| TIGD6        | 0.129021828  | 2.338350702  | 0.01997883  | 0.059133044 | no |
| CPNE1        | -0.129018721 | -2.338293441 | 0.019981839 | 0.059133806 | no |
| IGFBP3       | 0.129014124  | 2.338208717  | 0.019986292 | 0.059138841 | no |
| LINC00160    | 0.129001443  | 2.337975009  | 0.01999858  | 0.059163973 | no |
| LOC100506801 | 0.128999678  | 2.337942476  | 0.020000292 | 0.059163973 | no |
| TFAP2E       | -0.128981169 | -2.337601353 | 0.020018241 | 0.059208921 | no |
| ENTPD3-AS1   | -0.12897176  | -2.337427945 | 0.020027371 | 0.059227773 | no |
| SMARCD2      | 0.128966092  | 2.33732347   | 0.020032873 | 0.059235894 | no |
| ZBTB16       | -0.128961585 | -2.337240418 | 0.020037248 | 0.05924068  | no |
| SLC25A33     | -0.128937539 | -2.336797241 | 0.020060608 | 0.059299883 | no |
| PCDHA1       | -0.128935293 | -2.336755849 | 0.020062791 | 0.059299883 | no |
| FAM86DP      | 0.128928578  | 2.336632096  | 0.020069319 | 0.059303399 | no |
| RAD51B       | 0.128928392  | 2.336628672  | 0.0200695   | 0.059303399 | no |
| LRRTM1       | -0.128923344 | -2.336535633 | 0.020074409 | 0.059305664 | no |
| IPO9         | -0.128921929 | -2.336509547 | 0.020075785 | 0.059305664 | no |
| LILRB5       | 0.128875847  | 2.335660288  | 0.020120647 | 0.059430019 | no |
| NUP62CL      | 0.128856667  | 2.335306805  | 0.020139345 | 0.059477073 | no |
| PAX8         | 0.128852703  | 2.335233758  | 0.020143211 | 0.059480316 | no |
| AMZ2P1       | -0.12883222  | -2.334856263 | 0.020163199 | 0.05953116  | no |
| LINC00507    | -0.128802031 | -2.334299916 | 0.02019269  | 0.05961004  | no |
| VAV3-AS1     | 0.128777194  | 2.333842202  | 0.02021698  | 0.059672244 | no |
| IDI2         | -0.128774809 | -2.333798246 | 0.020219314 | 0.059672244 | no |
| DHX35        | -0.128741473 | -2.333183912 | 0.02025196  | 0.059760384 | no |
| PHYHIP       | -0.128729285 | -2.332959301 | 0.020263908 | 0.05978743  | no |
| LOC100289341 | -0.128722908 | -2.332841784 | 0.020270161 | 0.05979767  | no |
| LRRC59       | 0.128714807  | 2.3326925    | 0.020278107 | 0.059812902 | no |
| ATP5F1       | 0.128708642  | 2.332578883  | 0.020284157 | 0.059822535 | no |
| OCEL1        | 0.12869992   | 2.332418157  | 0.020292717 | 0.05983957  | no |
| ZDHHC19      | 0.128692668  | 2.33228452   | 0.020299837 | 0.059850592 | no |
| CASP8AP2     | -0.128690441 | -2.332243475 | 0.020302025 | 0.059850592 | no |
| OLFM3        | -0.128677709 | -2.332008849 | 0.020314532 | 0.05987925  | no |
| FGD3         | -0.128655456 | -2.331598781 | 0.020336408 | 0.059935511 | no |



|           |              |              |             |             |    |
|-----------|--------------|--------------|-------------|-------------|----|
| VSNL1     | -0.128649492 | -2.331488872 | 0.020342275 | 0.059944581 | no |
| FAHD1     | -0.12863832  | -2.331283001 | 0.020353268 | 0.059968753 | no |
| LINC00446 | 0.128621256  | 2.330968549  | 0.020370069 | 0.060003699 | no |
| PSMD5     | 0.128620603  | 2.330956509  | 0.020370713 | 0.060003699 | no |
| SOX18     | 0.128588799  | 2.330370455  | 0.020402059 | 0.060087797 | no |
| RARG      | 0.128580655  | 2.330220381  | 0.020410093 | 0.060103221 | no |
| 37500     | -0.128573876 | -2.330095453 | 0.020416783 | 0.060107086 | no |
| ALG5      | 0.128573657  | 2.330091415  | 0.020416999 | 0.060107086 | no |
| BCL6B     | 0.128519335  | 2.329090423  | 0.020470671 | 0.060256841 | no |
| RPS20     | -0.128511903 | -2.32895348  | 0.020478024 | 0.060270228 | no |
| AANAT     | 0.128503597  | 2.328800432  | 0.020486243 | 0.060279755 | no |
| SNX31     | -0.128502964 | -2.328788762 | 0.02048687  | 0.060279755 | no |
| LINC00837 | 0.128474923  | 2.328272054  | 0.020514643 | 0.06035321  | no |
| ODC1      | -0.128466683 | -2.328120219 | 0.020522811 | 0.060368974 | no |
| PRPF38A   | -0.128413646 | -2.327142948 | 0.020575447 | 0.060515525 | no |
| RAVER2    | -0.12839681  | -2.326832735 | 0.020592181 | 0.060531931 | no |
| TPPP      | -0.128395962 | -2.326817105 | 0.020593024 | 0.060531931 | no |
| CTXN2     | -0.128394504 | -2.32679025  | 0.020594473 | 0.060531931 | no |
| SAMD15    | 0.128394069  | 2.32678223   | 0.020594906 | 0.060531931 | no |
| SPAG7     | -0.128393865 | -2.326778476 | 0.020595109 | 0.060531931 | no |
| LINC00582 | 0.128386816  | 2.326648586  | 0.020602119 | 0.060544256 | no |
| CCDC9     | 0.128373998  | 2.326412401  | 0.020614873 | 0.060573452 | no |
| TRAF7     | 0.128365081  | 2.326248093  | 0.020623749 | 0.060591249 | no |
| ZFP82     | -0.128361192 | -2.326176445 | 0.020627621 | 0.060594341 | no |
| KCNJ3     | -0.128351935 | -2.326005876 | 0.02063684  | 0.060613138 | no |
| C6orf1    | 0.128346101  | 2.325898377  | 0.020642653 | 0.060613983 | no |
| TSPAN6    | 0.128345984  | 2.325896229  | 0.020642769 | 0.060613983 | no |
| FAM53C    | -0.128325655 | -2.32552165  | 0.020663033 | 0.060665197 | no |
| C14orf2   | -0.128313187 | -2.325291931 | 0.020675469 | 0.060693418 | no |
| NAT6      | -0.128292086 | -2.324903128 | 0.020696533 | 0.060746953 | no |
| PDXDC2P   | -0.12828071  | -2.32469353  | 0.020707896 | 0.060772004 | no |
| PGD       | 0.128247035  | 2.324073062  | 0.020741565 | 0.060858307 | no |
| LDB1      | -0.128245634 | -2.324047243 | 0.020742967 | 0.060858307 | no |
| REEP5     | -0.128229845 | -2.323756338 | 0.02075877  | 0.060892087 | no |
| ISM1      | -0.128228469 | -2.323730993 | 0.020760147 | 0.060892087 | no |
| C17orf50  | -0.128225149 | -2.323669825 | 0.020763472 | 0.060893528 | no |
| TOMM22    | -0.1282162   | -2.32350494  | 0.020772435 | 0.060911503 | no |
| MPV17     | 0.128189813  | 2.323018772  | 0.020798885 | 0.060980741 | no |
| NEUROD6   | -0.12817446  | -2.322735889 | 0.020814288 | 0.06101094  | no |
| SLAMF9    | 0.128173887  | 2.322725342  | 0.020814863 | 0.06101094  | no |
| COLEC10   | 0.128165873  | 2.322577695  | 0.020822906 | 0.061024431 | no |
| KIF12     | -0.128163644 | -2.322536625 | 0.020825144 | 0.061024431 | no |
| CYP2E1    | -0.128151133 | -2.322306109 | 0.020837709 | 0.061044936 | no |
| SGCA      | 0.12815102   | 2.322304028  | 0.020837823 | 0.061044936 | no |
| CAMK1G    | -0.128129752 | -2.32191219  | 0.020859197 | 0.061099223 | no |
| PRTFDC1   | -0.128120276 | -2.321737605 | 0.020868726 | 0.061118805 | no |
| PIPOX     | 0.128113046  | 2.321604406  | 0.020875999 | 0.061128402 | no |
| CTPS2     | -0.128111364 | -2.321573416 | 0.020877692 | 0.061128402 | no |
| FOXA3     | 0.128084742  | 2.321082938  | 0.020904494 | 0.061195929 | no |
| COBLL1    | 0.128082801  | 2.321047171  | 0.02090645  | 0.061195929 | no |
| THNSL2    | 0.128074464  | 2.320893573  | 0.02091485  | 0.06121218  | no |

|              |              |              |             |             |    |
|--------------|--------------|--------------|-------------|-------------|----|
| RABEP2       | 0.128061697  | 2.320658363  | 0.020927719 | 0.061239657 | no |
| PRR5         | 0.128059498  | 2.320617838  | 0.020929937 | 0.061239657 | no |
| LOC100505702 | 0.128040565  | 2.320269039  | 0.020949036 | 0.061287195 | no |
| KRT83        | -0.128017776 | -2.319849184 | 0.020972046 | 0.061345819 | no |
| GTF2H1       | 0.128015066  | 2.319799257  | 0.020974784 | 0.061345819 | no |
| FBX010       | -0.12799929  | -2.319508606 | 0.020990727 | 0.061384096 | no |
| ZNF586       | 0.127986747  | 2.319277529  | 0.021003411 | 0.06141283  | no |
| KIAA1731     | -0.127977376 | -2.319104892 | 0.021012891 | 0.061432191 | no |
| MAPK10       | -0.127971627 | -2.318998974 | 0.021018709 | 0.061440842 | no |
| SCYL1        | 0.127967626  | 2.318925258  | 0.021022759 | 0.061444324 | no |
| CORT         | -0.127963709 | -2.318853111 | 0.021026724 | 0.061447554 | no |
| RAD51C       | -0.127949524 | -2.318591769 | 0.02104109  | 0.061481178 | no |
| MCL1         | 0.127927239  | 2.318181232  | 0.021063676 | 0.061538805 | no |
| HMGA2        | 0.127921631  | 2.318077914  | 0.021069363 | 0.061547054 | no |
| PANX2        | -0.127913576 | -2.317929519 | 0.021077534 | 0.061562555 | no |
| SMA4         | -0.127906504 | -2.317799246 | 0.021084709 | 0.061565564 | no |
| GNPDA2       | -0.127906054 | -2.317790941 | 0.021085167 | 0.061565564 | no |
| AMN1         | -0.127904092 | -2.317754797 | 0.021087158 | 0.061565564 | no |
| DDX42        | -0.127896985 | -2.317623866 | 0.021094373 | 0.061578262 | no |
| SFTPB        | 0.127874762  | 2.317214476  | 0.021116945 | 0.061635782 | no |
| FAM179B      | -0.127869673 | -2.317120724 | 0.021122117 | 0.061642506 | no |
| LOC148145    | -0.127865873 | -2.31705073  | 0.021125979 | 0.061645406 | no |
| RFPL2        | -0.127824586 | -2.316290138 | 0.021167987 | 0.0617596   | no |
| THAP7-AS1    | -0.127821158 | -2.316226985 | 0.021171479 | 0.061761401 | no |
| IFT140       | -0.127817402 | -2.31615779  | 0.021175304 | 0.061764178 | no |
| PHF1         | -0.127808709 | -2.315997651 | 0.021184161 | 0.061781626 | no |
| GABRB2       | -0.127778259 | -2.315436702 | 0.02121521  | 0.061863783 | no |
| INTS10       | 0.127773249  | 2.315344411  | 0.021220322 | 0.061870296 | no |
| TSGA13       | 0.12775734   | 2.315051357  | 0.021236563 | 0.061909247 | no |
| ZNF267       | 0.127753801  | 2.314986153  | 0.021240177 | 0.061911387 | no |
| EDAR         | -0.12774424  | -2.314810031 | 0.021249944 | 0.061931455 | no |
| PAK3         | -0.127699337 | -2.313982869 | 0.021295867 | 0.062055461 | no |
| TIAF1        | -0.127696991 | -2.31393966  | 0.021298268 | 0.062055461 | no |
| UNC5CL       | -0.1276687   | -2.313418508 | 0.021327249 | 0.062131478 | no |
| SELV         | -0.127646654 | -2.31301241  | 0.021349856 | 0.062188907 | no |
| HACE1        | -0.127612094 | -2.312375795 | 0.021385338 | 0.062283817 | no |
| KIAA0319L    | 0.127604339  | 2.312232956  | 0.021393306 | 0.062298582 | no |
| PCM1         | -0.127593318 | -2.312029933 | 0.021404636 | 0.06232313  | no |
| MCFD2        | 0.127583831  | 2.311855186  | 0.021414392 | 0.062341464 | no |
| FAM20B       | -0.127581554 | -2.311813246 | 0.021416734 | 0.062341464 | no |
| ASB13        | -0.127572286 | -2.311642524 | 0.02142627  | 0.062360776 | no |
| CSGALNACT1   | -0.127550631 | -2.311243641 | 0.021448565 | 0.062417212 | no |
| SPHK2        | -0.127533263 | -2.310923735 | 0.021466461 | 0.062460832 | no |
| ATP9B        | -0.127520385 | -2.310686526 | 0.021479738 | 0.062485577 | no |
| PMS2P1       | 0.127519375  | 2.310667925  | 0.02148078  | 0.062485577 | no |
| IDI1         | -0.127499731 | -2.310306079 | 0.021501049 | 0.062536073 | no |
| AQP7         | -0.127482766 | -2.309993592 | 0.021518567 | 0.062578555 | no |
| ZNF100       | -0.127438072 | -2.309170358 | 0.021564776 | 0.062704452 | no |
| NPHP1        | 0.127431988  | 2.309058312  | 0.021571072 | 0.062714274 | no |
| C8orf34      | 0.127398291  | 2.308437645  | 0.021605978 | 0.062807259 | no |
| GPR22        | -0.127383586 | -2.308166799 | 0.021621225 | 0.062843082 | no |

|              |              |              |             |             |    |
|--------------|--------------|--------------|-------------|-------------|----|
| LOC100652791 | -0.127353585 | -2.30761422  | 0.021652362 | 0.062923511 | no |
| EIF4EBP2     | -0.127351283 | -2.30757182  | 0.021654753 | 0.062923511 | no |
| RPL8         | -0.127346141 | -2.307477109 | 0.021660094 | 0.062930523 | no |
| HIST1H3H     | 0.12734216   | 2.307403796  | 0.021664229 | 0.06293403  | no |
| ABCA9        | 0.127313893  | 2.306883168  | 0.021693616 | 0.06300586  | no |
| OPALIN       | -0.127312736 | -2.306861859 | 0.021694819 | 0.06300586  | no |
| CCDC71       | 0.127288991  | 2.306424506  | 0.021719533 | 0.063069111 | no |
| LPHN2        | 0.127285754  | 2.306364896  | 0.021722904 | 0.063070376 | no |
| TRIM29       | 0.127271057  | 2.306094208  | 0.021738214 | 0.063106304 | no |
| SLC17A7      | -0.12725015  | -2.305709138 | 0.021760011 | 0.063161047 | no |
| LOC727924    | -0.127239864 | -2.305519702 | 0.021770741 | 0.063176149 | no |
| MED27        | -0.127239527 | -2.305513485 | 0.021771093 | 0.063176149 | no |
| CADPS        | -0.12723262  | -2.305386278 | 0.021778301 | 0.063188533 | no |
| TMEM191A     | -0.127212672 | -2.305018893 | 0.021799129 | 0.063240428 | no |
| SNORA76      | -0.127206519 | -2.304905567 | 0.021805558 | 0.063250539 | no |
| TCP1         | -0.127179265 | -2.304403625 | 0.021834051 | 0.06332464  | no |
| SLC30A3      | -0.127132561 | -2.303543476 | 0.021882952 | 0.063457905 | no |
| EXD2         | -0.127124975 | -2.303403758 | 0.021890905 | 0.063472401 | no |
| C11orf65     | -0.127116903 | -2.303255107 | 0.021899368 | 0.063488376 | no |
| TNPO2        | -0.127101798 | -2.302976922 | 0.021915215 | 0.063525746 | no |
| SGTA         | -0.127085036 | -2.30266822  | 0.021932811 | 0.063567912 | no |
| TMEM87A      | 0.127080236  | 2.302579821  | 0.021937853 | 0.063567912 | no |
| CTBP2        | -0.127079491 | -2.302566102 | 0.021938635 | 0.063567912 | no |
| KIRREL2      | 0.127060453  | 2.302215492  | 0.02195864  | 0.063610078 | no |
| MYOD1        | -0.127060009 | -2.302207314 | 0.021959107 | 0.063610078 | no |
| HS3ST3A1     | 0.127046519  | 2.301958865  | 0.021973293 | 0.063642592 | no |
| CACNB2       | -0.127041204 | -2.301860996 | 0.021978883 | 0.063650206 | no |
| ZNF792       | 0.127029017  | 2.301636558  | 0.021991708 | 0.063678764 | no |
| RELN         | -0.127019219 | -2.3014561   | 0.022002024 | 0.063700054 | no |
| ATP1A2       | -0.126971348 | -2.300574524 | 0.022052482 | 0.06383754  | no |
| GFI1         | 0.126957185  | 2.300313692  | 0.022067431 | 0.063871968 | no |
| ACTG1        | 0.126954448  | 2.300263303  | 0.022070319 | 0.063871968 | no |
| ATXN7L2      | -0.126949542 | -2.300172944 | 0.022075501 | 0.06387836  | no |
| UBE3D        | -0.126934711 | -2.299899823 | 0.022091168 | 0.06391509  | no |
| PAF1         | -0.126931859 | -2.299847312 | 0.022094181 | 0.063915204 | no |
| LOC100133286 | -0.126905876 | -2.299368826 | 0.022121656 | 0.06398607  | no |
| COX6A1       | -0.126888954 | -2.299057196 | 0.022139565 | 0.064029255 | no |
| MSI2         | -0.126877709 | -2.298850129 | 0.022151473 | 0.064055072 | no |
| SIRPD        | 0.126834234  | 2.298049536  | 0.022197563 | 0.064179716 | no |
| HERC2P4      | -0.126829888 | -2.297969501 | 0.022202175 | 0.064184416 | no |
| SNRK         | -0.126823389 | -2.297849827 | 0.022209074 | 0.064192232 | no |
| MIR137HG     | -0.126821713 | -2.297818963 | 0.022210853 | 0.064192232 | no |
| WDR82        | -0.126800311 | -2.297424854 | 0.022233585 | 0.064247154 | no |
| SYT17        | -0.126798193 | -2.297385858 | 0.022235835 | 0.064247154 | no |
| PTMA         | 0.126766742  | 2.296806707  | 0.022269279 | 0.064335137 | no |
| SMS          | 0.126761506  | 2.296710273  | 0.022274853 | 0.064342588 | no |
| ALKBH5       | 0.126743675  | 2.296381935  | 0.022293837 | 0.064388772 | no |
| KCNIP4-IT1   | -0.126740822 | -2.296329406 | 0.022296875 | 0.064388894 | no |
| MAP4K3       | -0.126722148 | -2.295985535 | 0.022316775 | 0.064437703 | no |
| WBSCR17      | -0.126687866 | -2.29535428  | 0.022353347 | 0.064534629 | no |
| ZNF620       | -0.126661198 | -2.29486323  | 0.022381832 | 0.06459939  | no |

|              |              |              |             |             |    |
|--------------|--------------|--------------|-------------|-------------|----|
| PRKCB        | -0.126660199 | -2.294844823 | 0.0223829   | 0.06459939  | no |
| ST6GALNAC1   | -0.126657773 | -2.294800163 | 0.022385493 | 0.06459939  | no |
| PTF1A        | -0.126654234 | -2.294734998 | 0.022389276 | 0.06459939  | no |
| TMEM155      | -0.126652801 | -2.294708601 | 0.022390808 | 0.06459939  | no |
| EZR          | -0.126627508 | -2.294242865 | 0.022417863 | 0.064668766 | no |
| KLHL17       | -0.126586175 | -2.293481799 | 0.022462136 | 0.064787783 | no |
| ZNF506       | -0.126558517 | -2.292972536 | 0.022491804 | 0.064864648 | no |
| VIP          | -0.126551049 | -2.292835039 | 0.02249982  | 0.064875974 | no |
| TCEANC2      | 0.126549234  | 2.292801615  | 0.022501769 | 0.064875974 | no |
| LOC100507387 | -0.126540264 | -2.292636444 | 0.022511402 | 0.064895042 | no |
| LRP5         | -0.126535159 | -2.292542448 | 0.022516886 | 0.064902145 | no |
| ARPC1A       | 0.126511104  | 2.292099538  | 0.022542741 | 0.064967955 | no |
| B3GNT4       | -0.126500161 | -2.291898052 | 0.022554511 | 0.064993162 | no |
| MATN3        | 0.126477853  | 2.291487316  | 0.022578522 | 0.065053629 | no |
| LOC729739    | 0.126466463  | 2.291277587  | 0.022590791 | 0.065080254 | no |
| PEX26        | -0.126448833 | -2.290952982 | 0.022609792 | 0.065126262 | no |
| ZNF141       | -0.126428197 | -2.290573042 | 0.02263205  | 0.065181637 | no |
| SRR          | -0.12641221  | -2.290278699 | 0.022649306 | 0.065222595 | no |
| CHSY3        | 0.126373931  | 2.289573911  | 0.022690671 | 0.065332961 | no |
| LOC283856    | -0.126364202 | -2.289394783 | 0.022701195 | 0.065354507 | no |
| 39508        | -0.126359085 | -2.289300585 | 0.022706731 | 0.065361688 | no |
| ZNF155       | 0.126336371  | 2.288882377  | 0.022731323 | 0.065423714 | no |
| SLC26A2      | 0.126303561  | 2.288278323  | 0.022766885 | 0.06551729  | no |
| CCDC86       | 0.126299207  | 2.288198149  | 0.022771608 | 0.06552211  | no |
| NRN1L        | -0.126283398 | -2.28790709  | 0.022788764 | 0.065562694 | no |
| OXTR         | 0.12627709   | 2.287790962  | 0.022795612 | 0.065573617 | no |
| KLF10        | 0.126258876  | 2.287455633  | 0.022815396 | 0.065621744 | no |
| POU3F4       | -0.126238604 | -2.287082404 | 0.022837433 | 0.065676339 | no |
| ZNF471       | -0.126204777 | -2.286459642 | 0.022874246 | 0.065773405 | no |
| RCC1         | 0.126134008  | 2.285156775  | 0.022951429 | 0.06598651  | no |
| POP5         | 0.126113912  | 2.284786812  | 0.022973388 | 0.066040807 | no |
| RRAD         | 0.126109829  | 2.284711652  | 0.022977851 | 0.066044803 | no |
| ITPR3        | 0.126098473  | 2.284502583  | 0.02299027  | 0.066071662 | no |
| VPS37C       | 0.126012831  | 2.282925985  | 0.023084111 | 0.066332482 | no |
| FOXO4        | -0.125996439 | -2.282624234 | 0.02310211  | 0.066372594 | no |
| CPNE6        | -0.125994493 | -2.282588412 | 0.023104247 | 0.066372594 | no |
| APOL2        | -0.125989097 | -2.282489079 | 0.023110175 | 0.066380751 | no |
| SLC38A11     | 0.125963029  | 2.282009187  | 0.023138834 | 0.066454186 | no |
| SSTR1        | -0.125958533 | -2.281926431 | 0.023143779 | 0.066459507 | no |
| NCOR1        | -0.125954809 | -2.281857868 | 0.023147877 | 0.066462393 | no |
| ZNF786       | -0.125927175 | -2.281349181 | 0.023178299 | 0.066540852 | no |
| LOC100507173 | -0.125922457 | -2.281262318 | 0.023183497 | 0.066546885 | no |
| SYN2         | -0.125896655 | -2.280787351 | 0.023211939 | 0.06661963  | no |
| MAST3        | -0.125882086 | -2.280519163 | 0.023228013 | 0.06665686  | no |
| LOC729177    | -0.125863945 | -2.280185232 | 0.02324804  | 0.066705424 | no |
| OR5T1        | 0.125793794  | 2.278893923  | 0.023325626 | 0.066919108 | no |
| SLC7A5P1     | -0.125780397 | -2.27864732  | 0.023340469 | 0.066952752 | no |
| ALPL         | -0.125742758 | -2.277954481 | 0.023382213 | 0.067063546 | no |
| FGF11        | -0.125739847 | -2.277900904 | 0.023385444 | 0.067063862 | no |
| SYT1         | -0.125715033 | -2.277444162 | 0.023413002 | 0.067133934 | no |
| SRPRB        | 0.125703898  | 2.277239198  | 0.023425378 | 0.06716046  | no |

|           |              |              |             |             |    |
|-----------|--------------|--------------|-------------|-------------|----|
| HAGHL     | -0.125692329 | -2.277026253 | 0.023438242 | 0.067188378 | no |
| TTC14     | -0.125687491 | -2.276937203 | 0.023443624 | 0.067194841 | no |
| PRND      | 0.125667718  | 2.276573248  | 0.023465629 | 0.067248944 | no |
| FEM1C     | 0.125647732  | 2.276205376  | 0.023487889 | 0.067303763 | no |
| WDR11-AS1 | -0.125639874 | -2.27606073  | 0.023496647 | 0.06731961  | no |
| SDHAP3    | -0.125637149 | -2.276010574 | 0.023499684 | 0.06731961  | no |
| PIK3CG    | 0.125631055  | 2.27589841   | 0.023506478 | 0.067330097 | no |
| TTI2      | -0.12561762  | -2.275651133 | 0.023521461 | 0.067364036 | no |
| CPNE9     | -0.125613026 | -2.275566562 | 0.023526588 | 0.06736974  | no |
| PRKXP1    | -0.125604486 | -2.27540938  | 0.023536118 | 0.067388052 | no |
| CLRN1-AS1 | -0.125589212 | -2.275128247 | 0.023553173 | 0.067427899 | no |
| NXT1      | 0.125528125  | 2.274003888  | 0.023621488 | 0.067614464 | no |
| BCAM      | 0.125492739  | 2.273352608  | 0.023661138 | 0.06771894  | no |
| PRKCDBP   | 0.125471929  | 2.272969589  | 0.023684484 | 0.067776729 | no |
| C15orf37  | 0.125445945  | 2.272491351  | 0.023713661 | 0.067846589 | no |
| FAM73B    | -0.125444566 | -2.272465976 | 0.02371521  | 0.067846589 | no |
| C5orf46   | 0.125440106  | 2.272383882  | 0.023720222 | 0.067851895 | no |
| SFN       | 0.125424201  | 2.272091153  | 0.023738101 | 0.067894002 | no |
| QRICH2    | -0.125396798 | -2.271586821 | 0.023768932 | 0.067970122 | no |
| CKLF      | 0.125394925  | 2.271552345  | 0.023771041 | 0.067970122 | no |
| SOWAHB    | -0.125382317 | -2.271320297 | 0.023785239 | 0.068001673 | no |
| IP6K1     | -0.125325982 | -2.270283501 | 0.023848768 | 0.068174233 | no |
| KIF20B    | 0.125311184  | 2.270011141  | 0.023865482 | 0.068212936 | no |
| PTGS2     | 0.125308303  | 2.269958131  | 0.023868736 | 0.068213165 | no |
| PABPC1L2A | -0.12530377  | -2.269874702 | 0.023873858 | 0.068216598 | no |
| GPR12     | -0.125301622 | -2.269835169 | 0.023876286 | 0.068216598 | no |
| KATNB1    | -0.125277072 | -2.269383357 | 0.023904044 | 0.068286829 | no |
| TM9SF1    | 0.125254977  | 2.268976731  | 0.023929051 | 0.06834918  | no |
| KCNA5     | -0.125252002 | -2.268921983 | 0.023932419 | 0.068349718 | no |
| ZNF212    | -0.12523724  | -2.268650303 | 0.023949142 | 0.068388388 | no |
| LINC00656 | 0.125224108  | 2.26840863   | 0.023964026 | 0.068421799 | no |
| ZNF319    | -0.125201396 | -2.26799065  | 0.023989787 | 0.068486253 | no |
| PLA2G4B   | -0.125197215 | -2.267913712 | 0.023994532 | 0.0684907   | no |
| BDNF-AS   | -0.125178516 | -2.267569589 | 0.024015763 | 0.068542199 | no |
| C10orf25  | -0.125174074 | -2.267487844 | 0.024020808 | 0.068547496 | no |
| TGIF1     | 0.125133316  | 2.266737776  | 0.02406715  | 0.068670621 | no |
| PTGDR     | 0.125127523  | 2.266631173  | 0.024073743 | 0.068680313 | no |
| AGAP9     | -0.125122975 | -2.266547485 | 0.024078919 | 0.068685185 | no |
| C5orf22   | 0.125120408  | 2.266500237  | 0.024081842 | 0.068685185 | no |
| PSMB4     | 0.12510272   | 2.266174735  | 0.024101987 | 0.068733521 | no |
| HCAR2     | 0.125089321  | 2.26592815   | 0.024117258 | 0.068767945 | no |
| NELL2     | -0.125075994 | -2.265682909 | 0.024132455 | 0.068802147 | no |
| POLR2M    | -0.12506761  | -2.265528618 | 0.024142019 | 0.06881635  | no |
| ESM1      | 0.125066014  | 2.265499247  | 0.02414384  | 0.06881635  | no |
| AATF      | -0.125054443 | -2.265286325 | 0.024157046 | 0.068841986 | no |
| MANSC1    | 0.12505252   | 2.265250941  | 0.024159241 | 0.068841986 | no |
| EDEM3     | 0.125033013  | 2.264891961  | 0.024181522 | 0.068896339 | no |
| PDGFD     | 0.125001713  | 2.264315982  | 0.024217308 | 0.068982599 | no |
| NCS1      | -0.124999029 | -2.264266589 | 0.024220379 | 0.068982599 | no |
| PRRG2     | 0.124998112  | 2.264249725  | 0.024221427 | 0.068982599 | no |
| MGP       | 0.124984425  | 2.263997852  | 0.024237093 | 0.069017076 | no |

|             |              |              |             |             |    |
|-------------|--------------|--------------|-------------|-------------|----|
| CIDCEP      | -0.124981925 | -2.263951845 | 0.024239956 | 0.069017076 | no |
| KPNA6       | 0.124961153  | 2.263569622  | 0.024263748 | 0.069075668 | no |
| FLJ46361    | -0.124951377 | -2.263389722 | 0.024274954 | 0.069098415 | no |
| TCTN2       | 0.124945069  | 2.263273639  | 0.024282187 | 0.069109849 | no |
| WNK3        | -0.124941914 | -2.263215592 | 0.024285804 | 0.069110993 | no |
| CENPJ       | -0.124926898 | -2.262939269 | 0.024303031 | 0.069145715 | no |
| UHRF1BP1L   | -0.12492567  | -2.262916669 | 0.02430444  | 0.069145715 | no |
| SEN3-EIF4A1 | 0.124903155  | 2.262502369  | 0.02433029  | 0.069210096 | no |
| SNRPF       | -0.124897482 | -2.262397985 | 0.024336807 | 0.069219471 | no |
| LOC286177   | -0.124882334 | -2.262119244 | 0.024354217 | 0.069259821 | no |
| LHX5        | -0.124873587 | -2.261958284 | 0.024364275 | 0.069279257 | no |
| PRDM2       | -0.124865689 | -2.261812952 | 0.024373359 | 0.069295921 | no |
| INHBA-AS1   | -0.124858584 | -2.261682216 | 0.024381534 | 0.069309993 | no |
| RBM6        | -0.124852832 | -2.261576382 | 0.024388153 | 0.069319641 | no |
| TGFBR3L     | -0.124829545 | -2.261147888 | 0.02441497  | 0.069386685 | no |
| HOMER3      | 0.124822228  | 2.261013247  | 0.024423401 | 0.06940147  | no |
| ZUFSP       | -0.124779577 | -2.260228447 | 0.024472597 | 0.069532071 | no |
| PRKD2       | 0.124727007  | 2.259261165  | 0.024533351 | 0.069695472 | no |
| RFESD       | 0.124706765  | 2.258888714  | 0.024556779 | 0.069752808 | no |
| MGAM        | 0.124691928  | 2.258615712  | 0.024573964 | 0.069792397 | no |
| PBDC1       | 0.124656512  | 2.257964075  | 0.024615026 | 0.069899778 | no |
| PRKAR1B     | -0.124645123 | -2.257754524 | 0.024628243 | 0.069928071 | no |
| TOMM34      | 0.124637043  | 2.257605851  | 0.024637624 | 0.069945466 | no |
| SLC4A3      | 0.124625907  | 2.25740097   | 0.024650557 | 0.069972939 | no |
| PLS1        | -0.124612722 | -2.257158366 | 0.024665879 | 0.070007184 | no |
| CDH12       | -0.124602561 | -2.25697142  | 0.024677691 | 0.070028972 | no |
| C14orf1     | -0.124600513 | -2.256933741 | 0.024680072 | 0.070028972 | no |
| LOC728716   | -0.124567325 | -2.256323124 | 0.024718692 | 0.070129295 | no |
| HMGCLL1     | -0.124531407 | -2.255662277 | 0.024760548 | 0.070238771 | no |
| GIGYF1      | -0.124504845 | -2.25517357  | 0.02479154  | 0.070317407 | no |
| HS6ST2      | -0.12449623  | -2.255015079 | 0.024801599 | 0.070336653 | no |
| SDAD1       | 0.124486497  | 2.254835999  | 0.024812968 | 0.070359611 | no |
| ZBTB46      | 0.124417254  | 2.253562071  | 0.024893977 | 0.070580008 | no |
| SERPINB2    | 0.124414318  | 2.253508066  | 0.024897416 | 0.070580448 | no |
| NET1        | -0.124411494 | -2.253456103 | 0.024900726 | 0.07058052  | no |
| RPS15A      | -0.124401069 | -2.253264301 | 0.024912945 | 0.070605843 | no |
| DCBLD1      | 0.124385759  | 2.252982638  | 0.024930899 | 0.070642889 | no |
| ANO5        | -0.124384234 | -2.252954584 | 0.024932688 | 0.070642889 | no |
| LOC152217   | -0.124381515 | -2.252904563 | 0.024935878 | 0.070642889 | no |
| RANGAP1     | -0.124374863 | -2.252782183 | 0.024943684 | 0.070655688 | no |
| SCN8A       | -0.12435252  | -2.252371137 | 0.024969917 | 0.070720674 | no |
| LOC339524   | 0.124342338  | 2.252183801  | 0.02498188  | 0.070745235 | no |
| ANO6        | 0.124335043  | 2.252049594  | 0.024990454 | 0.070757197 | no |
| MZT1        | -0.124333141 | -2.252014616 | 0.024992689 | 0.070757197 | no |
| SLC9A4      | -0.124329911 | -2.251955193 | 0.024996487 | 0.070758627 | no |
| HSPBP1      | 0.124319017  | 2.251754769  | 0.025009298 | 0.070785569 | no |
| CCNG1       | 0.12430166   | 2.251435459  | 0.025029721 | 0.070834045 | no |
| PRR12       | -0.124286684 | -2.251159934 | 0.025047355 | 0.070874616 | no |
| GREM1       | 0.124261701  | 2.250700339  | 0.025076794 | 0.070948576 | no |
| ETFB        | -0.124249658 | -2.250478785 | 0.025090996 | 0.070979413 | no |
| SLC43A2     | 0.124222248  | 2.249974536  | 0.025123346 | 0.071061573 | no |

|              |              |              |             |             |    |
|--------------|--------------|--------------|-------------|-------------|----|
| EIF3K        | 0.124216152  | 2.249862388  | 0.025130546 | 0.071072583 | no |
| FAM149B1     | -0.124210521 | -2.249758806 | 0.025137197 | 0.07107498  | no |
| LOC202781    | -0.124208768 | -2.249726548 | 0.025139269 | 0.07107498  | no |
| TACR2        | 0.124207036  | 2.249694695  | 0.025141315 | 0.07107498  | no |
| MED1         | -0.124125282 | -2.248190747 | 0.025238075 | 0.071339139 | no |
| SEMA3G       | -0.124116929 | -2.248037082 | 0.02524798  | 0.071357751 | no |
| AQP6         | -0.124102742 | -2.247776112 | 0.025264809 | 0.071395925 | no |
| C11orf68     | -0.124058385 | -2.24696014  | 0.02531749  | 0.071535391 | no |
| LOC100287534 | 0.12405096   | 2.246823557  | 0.025326318 | 0.071550927 | no |
| GPR83        | -0.124020247 | -2.246258596 | 0.02536286  | 0.071644747 | no |
| OVCA2        | 0.123972401  | 2.245378476  | 0.025419879 | 0.071790479 | no |
| NR2E3        | -0.123971351 | -2.245359161 | 0.025421132 | 0.071790479 | no |
| DIRC1        | 0.123962878  | 2.245203305  | 0.025431241 | 0.071809592 | no |
| PIK3CB       | -0.123959724 | -2.245145282 | 0.025435006 | 0.071810786 | no |
| KIAA0947     | -0.12394536  | -2.244881072 | 0.025452153 | 0.07184976  | no |
| STK17B       | 0.123932996  | 2.24465365   | 0.025466921 | 0.071882007 | no |
| ZNF705B      | 0.123878527  | 2.243651736  | 0.025532071 | 0.072056432 | no |
| NSDHL        | -0.123873758 | -2.243564017 | 0.025537781 | 0.072063086 | no |
| NPM1         | 0.123847529  | 2.24308155   | 0.025569212 | 0.072142304 | no |
| ENOX2        | 0.123840639  | 2.242954816  | 0.025577473 | 0.072154385 | no |
| CYTH3        | 0.123838358  | 2.24291287   | 0.025580208 | 0.072154385 | no |
| SNORA40      | -0.12377169  | -2.24168661  | 0.025660274 | 0.072370728 | no |
| WTAPP1       | 0.123742638  | 2.241152258  | 0.025695231 | 0.07245981  | no |
| LOC100289361 | -0.123738774 | -2.241081175 | 0.025699885 | 0.072463424 | no |
| PACRG-AS1    | -0.123729513 | -2.240910846 | 0.025711038 | 0.072485362 | no |
| CTAGE11P     | 0.123704522  | 2.240451199  | 0.025741157 | 0.072560757 | no |
| ZNF560       | -0.123688105 | -2.240149235 | 0.025760961 | 0.072607057 | no |
| ENO4         | 0.123675381  | 2.239915206  | 0.025776318 | 0.072640513 | no |
| SLC30A10     | -0.12367267  | -2.239865342 | 0.025779591 | 0.072640513 | no |
| NXN          | -0.1236497   | -2.239442866 | 0.025807338 | 0.072709163 | no |
| CLEC4GP1     | -0.123645063 | -2.239357592 | 0.025812941 | 0.072715418 | no |
| MIR4500HG    | -0.123640068 | -2.239265724 | 0.025818979 | 0.072722895 | no |
| MTMR3        | -0.123617913 | -2.238858229 | 0.025845777 | 0.072788835 | no |
| LINC00593    | -0.123610576 | -2.238723289 | 0.025854656 | 0.072804301 | no |
| FLJ34503     | -0.123603958 | -2.238601581 | 0.025862667 | 0.072817317 | no |
| KCTD11       | 0.123581608  | 2.238190507  | 0.02588974  | 0.072883994 | no |
| ZNF318       | -0.123572221 | -2.238017868 | 0.025901117 | 0.072906472 | no |
| ZBTB20       | -0.123560586 | -2.237803876 | 0.025915226 | 0.072936632 | no |
| CRIP1        | -0.123542602 | -2.237473121 | 0.025937046 | 0.072988483 | no |
| LOC100287177 | 0.123517098  | 2.237004067  | 0.025968016 | 0.073066069 | no |
| SLC6A13      | -0.123499793 | -2.236685804 | 0.025989049 | 0.073115675 | no |
| DCDC1        | 0.123493196  | 2.236564483  | 0.02599707  | 0.073128669 | no |
| KALRN        | -0.123488966 | -2.236486683 | 0.026002215 | 0.07313357  | no |
| KCNJ2        | 0.123459267  | 2.235940486  | 0.026038361 | 0.07322565  | no |
| LOC648987    | 0.123451091  | 2.235790118  | 0.02604832  | 0.073244071 | no |
| LOC338799    | -0.123445619 | -2.235689484 | 0.026054986 | 0.073253233 | no |
| ZNF19        | -0.123437263 | -2.235535812 | 0.026065169 | 0.073272277 | no |
| RB1CC1       | -0.123431626 | -2.235432129 | 0.026072042 | 0.073282011 | no |
| IGSF8        | -0.123428657 | -2.23537753  | 0.026075662 | 0.073282601 | no |
| LINC00467    | 0.123391683  | 2.234697556  | 0.026120778 | 0.073392928 | no |
| DHRS2        | -0.123390888 | -2.234682927 | 0.026121749 | 0.073392928 | no |

|              |               |               |              |              |    |
|--------------|---------------|---------------|--------------|--------------|----|
| KITLG        | 0. 123384892  | 2. 23457267   | 0. 026129071 | 0. 073403238 | no |
| RAD17        | -0. 12338229  | -2. 234524819 | 0. 02613225  | 0. 073403238 | no |
| C19orf55     | 0. 123310423  | 2. 233203155  | 0. 026220169 | 0. 073640571 | no |
| SUFU         | -0. 123297798 | -2. 23297098  | 0. 02623564  | 0. 073674394 | no |
| UBE2D1       | 0. 123272487  | 2. 232505512  | 0. 026266681 | 0. 073751925 | no |
| GTF2H2       | -0. 123247817 | -2. 232051837 | 0. 026296966 | 0. 073827314 | no |
| FGF8         | -0. 123201996 | -2. 231209214 | 0. 026353295 | 0. 073975792 | no |
| CCK          | -0. 123152618 | -2. 230301202 | 0. 026414113 | 0. 07413683  | no |
| LRRC73       | -0. 123148161 | -2. 230219237 | 0. 026419609 | 0. 074142572 | no |
| MLL2         | -0. 123126078 | -2. 229813166 | 0. 026446852 | 0. 074209334 | no |
| RABEP1       | -0. 123096939 | -2. 229277328 | 0. 026482838 | 0. 074300609 | no |
| C20orf195    | 0. 123075386  | 2. 228881009  | 0. 026509481 | 0. 074365651 | no |
| PEX6         | -0. 123044211 | -2. 228307744 | 0. 026548061 | 0. 074464158 | no |
| MFSD3        | -0. 123036585 | -2. 228167521 | 0. 026557505 | 0. 074480927 | no |
| SLC19A3      | 0. 123031289  | 2. 228070129  | 0. 026564066 | 0. 074489608 | no |
| NAE1         | -0. 123015636 | -2. 227782309 | 0. 026583465 | 0. 074534278 | no |
| LPCAT4       | -0. 12299628  | -2. 227426398 | 0. 02660747  | 0. 074591851 | no |
| GBA          | 0. 122986404  | 2. 22724479   | 0. 026619725 | 0. 074616476 | no |
| LOC388692    | 0. 122979516  | 2. 227118145  | 0. 026628275 | 0. 074617403 | no |
| TRUB1        | -0. 122978913 | -2. 227107049 | 0. 026629024 | 0. 074617403 | no |
| ZBTB11       | -0. 122977747 | -2. 227085603 | 0. 026630472 | 0. 074617403 | no |
| NT5E         | 0. 122962959  | 2. 226813698  | 0. 026648838 | 0. 074659128 | no |
| KLHL7        | -0. 12295715  | -2. 226706887 | 0. 026656055 | 0. 074669614 | no |
| SNIP1        | 0. 122945888  | 2. 226499794  | 0. 026670053 | 0. 074699089 | no |
| RGS9BP       | -0. 122929141 | -2. 226191864 | 0. 026690879 | 0. 074743686 | no |
| LOC100505933 | -0. 122927491 | -2. 226161531 | 0. 026692932 | 0. 074743686 | no |
| ZDHHC11      | -0. 122920775 | -2. 226038033 | 0. 026701289 | 0. 074757347 | no |
| NFRKB        | -0. 122907099 | -2. 225786564 | 0. 026718312 | 0. 074795265 | no |
| CYB561D1     | 0. 122891403  | 2. 225497973  | 0. 026737861 | 0. 074835067 | no |
| ASAH1        | 0. 122890092  | 2. 225473857  | 0. 026739495 | 0. 074835067 | no |
| SLC9B2       | -0. 12287087  | -2. 225120425 | 0. 026763454 | 0. 074892367 | no |
| PI4KA        | -0. 122866627 | -2. 225042398 | 0. 026768745 | 0. 074897423 | no |
| ZNF221       | -0. 122837993 | -2. 224515912 | 0. 026804476 | 0. 074987632 | no |
| GLOD4        | -0. 122833198 | -2. 22442775  | 0. 026810463 | 0. 074989582 | no |
| NDUFA13      | -0. 122831846 | -2. 22440289  | 0. 026812152 | 0. 074989582 | no |
| SPINK8       | 0. 122821928  | 2. 224220535  | 0. 02682454  | 0. 075014469 | no |
| MPST         | -0. 122817451 | -2. 224138207 | 0. 026830135 | 0. 075020352 | no |
| DNMT3B       | -0. 12280882  | -2. 22397952  | 0. 026840921 | 0. 075040749 | no |
| IDO2         | 0. 122804591  | 2. 223901763  | 0. 026846208 | 0. 075045767 | no |
| GAL3ST3      | -0. 122799843 | -2. 223814467 | 0. 026852145 | 0. 075052599 | no |
| CEP78        | -0. 122786812 | -2. 223574862 | 0. 026868444 | 0. 075088392 | no |
| RRH          | -0. 122761822 | -2. 223115393 | 0. 026899725 | 0. 075166037 | no |
| SOD1         | -0. 12274969  | -2. 222892331 | 0. 026914923 | 0. 075198726 | no |
| ANP32A-IT1   | -0. 122737136 | -2. 222661514 | 0. 026930656 | 0. 075232904 | no |
| PI4KAP1      | -0. 122727584 | -2. 222485882 | 0. 026942634 | 0. 075256582 | no |
| TMEM220-AS1  | 0. 122699638  | 2. 221972081  | 0. 026977699 | 0. 075344735 | no |
| C16orf46     | -0. 122653475 | -2. 221123342 | 0. 02703571  | 0. 075496939 | no |
| FLVCR1-AS1   | 0. 122647474  | 2. 221013009  | 0. 027043259 | 0. 075508208 | no |
| CSMD2        | -0. 122641829 | -2. 22090922  | 0. 027050362 | 0. 07551823  | no |
| CACNA1E      | -0. 122632562 | -2. 220738836 | 0. 027062026 | 0. 07554098  | no |
| CASP1        | 0. 122618883  | 2. 220487359  | 0. 02707925  | 0. 075579242 | no |



|            |              |              |             |             |    |
|------------|--------------|--------------|-------------|-------------|----|
| FLJ34208   | 0.122613526  | 2.220388862  | 0.027085999 | 0.075588261 | no |
| GPRC5B     | -0.122608725 | -2.220300588 | 0.027092048 | 0.075595326 | no |
| PRKAG2-AS1 | -0.122602897 | -2.220193448 | 0.027099392 | 0.075606002 | no |
| C19orf59   | 0.122584845  | 2.219861561  | 0.027122152 | 0.075651501 | no |
| BBS2       | -0.122584379 | -2.219852982 | 0.027122274 | 0.075651501 | no |
| SH3PXD2B   | 0.122581362  | 2.219797527  | 0.027126545 | 0.075652294 | no |
| SPRR2G     | -0.122576969 | -2.219716755 | 0.027132088 | 0.075657323 | no |
| C10orf67   | 0.122574352  | 2.219668649  | 0.027135389 | 0.075657323 | no |
| NECAB3     | -0.12257119  | -2.219610514 | 0.027139379 | 0.075658632 | no |
| LRP1       | 0.122545727  | 2.219142384  | 0.027171528 | 0.075738433 | no |
| RXRG       | -0.122528927 | -2.21883351  | 0.027192759 | 0.07578778  | no |
| LYPD6B     | -0.122499255 | -2.218288007 | 0.027230288 | 0.075882538 | no |
| NR4A3      | 0.122489546  | 2.218109503  | 0.027242579 | 0.075906945 | no |
| RECQL      | 0.12248667   | 2.218056644  | 0.02724622  | 0.075907247 | no |
| LOC440243  | -0.12247081  | -2.217765062 | 0.027266309 | 0.075953368 | no |
| PCBP1      | 0.122465472  | 2.217666922  | 0.027273073 | 0.075962365 | no |
| ZNF274     | -0.122458905 | -2.217546195 | 0.027281396 | 0.075975701 | no |
| PLA2G4C    | 0.122428956  | 2.21699561   | 0.027319383 | 0.076071633 | no |
| PCDHB8     | -0.12242523  | -2.216927111 | 0.027324112 | 0.076074944 | no |
| UBTF       | -0.122377492 | -2.216049505 | 0.027384765 | 0.076233936 | no |
| MTDH       | 0.122366605  | 2.215849362  | 0.027398614 | 0.076262609 | no |
| RPL24      | -0.122358935 | -2.215708359 | 0.027408374 | 0.076279897 | no |
| CSRNP1     | 0.122312742  | 2.214859183  | 0.027467217 | 0.076433764 | no |
| GSTM4      | 0.122305414  | 2.214724464  | 0.027476562 | 0.076440998 | no |
| NOP14-AS1  | -0.122304023 | -2.214698907 | 0.027478335 | 0.076440998 | no |
| DDX55      | -0.122301378 | -2.214650281 | 0.027481709 | 0.076440998 | no |
| UBA6       | 0.122298713  | 2.214601282  | 0.02748511  | 0.076440998 | no |
| ZNF184     | -0.12229676  | -2.214565384 | 0.027487601 | 0.076440998 | no |
| POLD1      | -0.122277487 | -2.214211097 | 0.027512199 | 0.076497417 | no |
| AGT        | -0.122271645 | -2.214103694 | 0.02751966  | 0.076497417 | no |
| PRELID2    | 0.122270588  | 2.214084274  | 0.027521009 | 0.076497417 | no |
| RHBDD2     | 0.122269713  | 2.214068188  | 0.027522127 | 0.076497417 | no |
| AZIN1      | -0.122262092 | -2.213928087 | 0.027531862 | 0.076514581 | no |
| MRPL45     | -0.122228254 | -2.213306046 | 0.027575124 | 0.0766143   | no |
| TRAF3      | -0.122226578 | -2.213275246 | 0.027577267 | 0.0766143   | no |
| WHAMMP3    | 0.122225663  | 2.21325842   | 0.027578439 | 0.0766143   | no |
| RAB26      | -0.122221446 | -2.213180893 | 0.027583835 | 0.076619387 | no |
| RYR1       | -0.122173648 | -2.21230226  | 0.027645059 | 0.076779524 | no |
| FAM215A    | -0.122150894 | -2.211883983 | 0.027674246 | 0.076850655 | no |
| CSAD       | -0.122143063 | -2.211740049 | 0.027684296 | 0.076868631 | no |
| MVK        | -0.122104563 | -2.21103234  | 0.027733756 | 0.076996015 | no |
| CCDC89     | 0.122100041  | 2.210949208  | 0.027739571 | 0.077002211 | no |
| LY6D       | -0.122087336 | -2.210715683 | 0.027755911 | 0.077037619 | no |
| KLHDC7A    | 0.122083813  | 2.210650914  | 0.027760445 | 0.077040252 | no |
| CLDND2     | -0.122068638 | -2.210371975 | 0.027779976 | 0.077084502 | no |
| AOX2P      | 0.122061228  | 2.210235772  | 0.027789518 | 0.077101023 | no |
| RFXAP      | -0.122053847 | -2.210100097 | 0.027799025 | 0.077117445 | no |
| B9D2       | 0.122046572  | 2.209966369  | 0.027808398 | 0.077133491 | no |
| RBM45      | 0.122026673  | 2.209600611  | 0.02783405  | 0.077194679 | no |
| HPS4       | -0.121984448 | -2.208824463 | 0.027888551 | 0.077335852 | no |
| HSBP1L1    | 0.121951842  | 2.208225136  | 0.027930699 | 0.077442737 | no |

|              |              |              |             |             |    |
|--------------|--------------|--------------|-------------|-------------|----|
| WDR86-AS1    | -0.121947962 | -2.208153821 | 0.027935718 | 0.077446661 | no |
| SCRG1        | -0.121939437 | -2.207997132 | 0.027946748 | 0.077467247 | no |
| TMSB10       | 0.121932986  | 2.207878544  | 0.027955099 | 0.077480401 | no |
| BOLA1        | -0.121925981 | -2.207749806 | 0.027964166 | 0.077495538 | no |
| NFS1         | -0.121896554 | -2.207208909 | 0.028002292 | 0.077591189 | no |
| TIMP4        | -0.121891099 | -2.207108649 | 0.028009364 | 0.077592406 | no |
| PFKP         | -0.121890645 | -2.207100309 | 0.028009952 | 0.077592406 | no |
| C2orf72      | -0.121878149 | -2.20687062  | 0.02802616  | 0.077627297 | no |
| LYRM9        | -0.121871357 | -2.206745787 | 0.028034972 | 0.077641698 | no |
| ADD3         | -0.121813231 | -2.205677428 | 0.028110485 | 0.077840797 | no |
| WDR44        | 0.12180807   | 2.205582573  | 0.028117198 | 0.077849355 | no |
| GPATCH2L     | -0.121786681 | -2.205189448 | 0.028145034 | 0.077916389 | no |
| SHISA6       | -0.121773531 | -2.204947758 | 0.02816216  | 0.077953758 | no |
| MYL6         | 0.121735494  | 2.204248672  | 0.028211746 | 0.078080958 | no |
| LOC100507346 | -0.121710705 | -2.203793062 | 0.028244103 | 0.078160446 | no |
| FAM149A      | -0.12169701  | -2.203541367 | 0.028261992 | 0.078199882 | no |
| BACH1        | 0.121691615  | 2.203442209  | 0.028269043 | 0.07820932  | no |
| RNF44        | -0.121660298 | -2.202866637 | 0.028309997 | 0.078312542 | no |
| NPAS2        | 0.121646864  | 2.202619744  | 0.02832758  | 0.078351096 | no |
| LINC00441    | -0.121638537 | -2.2024667   | 0.028338484 | 0.078365376 | no |
| TCEA1        | -0.121637352 | -2.202444931 | 0.028340035 | 0.078365376 | no |
| MCHR2        | -0.121626466 | -2.202244857 | 0.028354296 | 0.078394723 | no |
| ZDHHC3       | 0.121595435  | 2.20167455   | 0.028394982 | 0.078497112 | no |
| ULBP1        | 0.121591869  | 2.201609019  | 0.02839966  | 0.078499947 | no |
| PUSL1        | 0.121578917  | 2.201370983  | 0.028416658 | 0.078536832 | no |
| INTS6        | 0.12153545   | 2.200572143  | 0.028473769 | 0.078684554 | no |
| ACYP2        | -0.121511381 | -2.200129812 | 0.028505435 | 0.078761933 | no |
| FAM72B       | 0.121470274  | 2.199374355  | 0.028559588 | 0.078901416 | no |
| LOC389831    | -0.121439544 | -2.198809629 | 0.028600127 | 0.079003257 | no |
| MYLIP        | 0.121433244  | 2.198693861  | 0.028608444 | 0.079016074 | no |
| ERG          | 0.121421069  | 2.198470119  | 0.028624523 | 0.079050325 | no |
| RGL4         | -0.121415775 | -2.198372826 | 0.028631518 | 0.079059482 | no |
| F2RL3        | 0.121411429  | 2.198292964  | 0.02863726  | 0.079065179 | no |
| LOC100506804 | -0.121390622 | -2.197910589 | 0.028664768 | 0.079130961 | no |
| PPP4R4       | -0.121371545 | -2.197560015 | 0.028690008 | 0.079190466 | no |
| CEP95        | -0.121349415 | -2.19715333  | 0.028719313 | 0.079261172 | no |
| MAP4K5       | -0.121339479 | -2.196970737 | 0.028732478 | 0.079287325 | no |
| PRR18        | -0.12133128  | -2.196820075 | 0.028743345 | 0.07930473  | no |
| TMEM181      | -0.121329152 | -2.196780976 | 0.028746166 | 0.07930473  | no |
| MLX          | 0.121311785  | 2.196461835  | 0.028769199 | 0.079358086 | no |
| MTMR14       | 0.121302022  | 2.196282414  | 0.028782155 | 0.079383636 | no |
| REM2         | -0.121296285 | -2.196176987 | 0.02878977  | 0.07939445  | no |
| LOC729970    | 0.121290853  | 2.196077171  | 0.028796982 | 0.079404148 | no |
| TRIM2        | -0.121267677 | -2.195651292 | 0.028827769 | 0.079477904 | no |
| PRELID1      | 0.121265151  | 2.195604864  | 0.028831127 | 0.079477904 | no |
| MTX3         | -0.12124989  | -2.195324439 | 0.028851416 | 0.079523635 | no |
| ADAMTS20     | -0.121231284 | -2.194982543 | 0.02887617  | 0.079581658 | no |
| AGAP5        | -0.121225462 | -2.194875558 | 0.02888392  | 0.079592809 | no |
| DSCR3        | 0.121184778  | 2.194127962  | 0.028938124 | 0.079731951 | no |
| C1QTNF1      | 0.121142821  | 2.193356983  | 0.028994115 | 0.079849565 | no |
| EPC2         | -0.121141411 | -2.193331073 | 0.028995998 | 0.079849565 | no |

|           |              |              |             |             |    |
|-----------|--------------|--------------|-------------|-------------|----|
| UTP15     | 0.121141271  | 2.193328506  | 0.028996185 | 0.079849565 | no |
| ZBTB14    | -0.121140074 | -2.193306504 | 0.028997784 | 0.079849565 | no |
| ASL       | 0.121138873  | 2.193284437  | 0.028999388 | 0.079849565 | no |
| LEFTY2    | 0.121123963  | 2.193010458  | 0.029019311 | 0.079894187 | no |
| PTPRR     | -0.121111954 | -2.192789795 | 0.029035366 | 0.079928148 | no |
| SCRN2     | -0.1211066   | -2.192691426 | 0.029042526 | 0.079937617 | no |
| MIR223    | 0.121102361  | 2.19261352   | 0.029048197 | 0.079942989 | no |
| XPNPEP2   | 0.121098181  | 2.192536727  | 0.029053788 | 0.079948138 | no |
| GUSBP11   | -0.12107138  | -2.192044263 | 0.029089665 | 0.08002708  | no |
| WDR26     | 0.121071187  | 2.192040716  | 0.029089924 | 0.08002708  | no |
| LOXL4     | 0.121037381  | 2.191419541  | 0.029135233 | 0.080141468 | no |
| WNT10B    | -0.121014993 | -2.191008175 | 0.029165272 | 0.080213829 | no |
| EEF1A1    | -0.120992871 | -2.190601691 | 0.029194981 | 0.080285264 | no |
| ZNF829    | -0.120985943 | -2.190474403 | 0.02920429  | 0.080292383 | no |
| ELFN1     | -0.120985383 | -2.190464114 | 0.029205042 | 0.080292383 | no |
| ARHGAP26  | 0.120926088  | 2.189374626  | 0.029284823 | 0.080501423 | no |
| TCF23     | 0.120909181  | 2.189063989  | 0.029307605 | 0.080553745 | no |
| EGFL7     | 0.120893832  | 2.188781957  | 0.029328302 | 0.08059142  | no |
| UBXN1     | -0.120893453 | -2.188775005 | 0.029328812 | 0.08059142  | no |
| MPPE1     | 0.120887119  | 2.188658623  | 0.029337357 | 0.080604594 | no |
| GNAT2     | 0.120882477  | 2.188573335  | 0.02934362  | 0.080609851 | no |
| RNF39     | -0.120879166 | -2.188512507 | 0.029348087 | 0.080609851 | no |
| NTPCR     | -0.120877362 | -2.188479352 | 0.029350523 | 0.080609851 | no |
| STRADA    | -0.120856535 | -2.188096692 | 0.029378643 | 0.080676772 | no |
| ATP6AP1L  | -0.120838579 | -2.187766787 | 0.029402905 | 0.080733083 | no |
| CCDC3     | 0.120814827  | 2.187330379  | 0.029435027 | 0.080810956 | no |
| LOC158434 | -0.120805566 | -2.187160239 | 0.029447558 | 0.080822163 | no |
| SAMD12    | -0.120805283 | -2.187155027 | 0.029447942 | 0.080822163 | no |
| POLE4     | 0.120803473  | 2.18712178   | 0.029450391 | 0.080822163 | no |
| PEX7      | -0.120767636 | -2.186463359 | 0.029498933 | 0.080938592 | no |
| PDCL3P4   | -0.120764076 | -2.186397949 | 0.029503759 | 0.080938592 | no |
| ZBTB4     | -0.120763814 | -2.186393133 | 0.029504115 | 0.080938592 | no |
| UNC119B   | 0.120760889  | 2.186339401  | 0.02950808  | 0.080939138 | no |
| RASGRF2   | -0.120739481 | -2.185946082 | 0.029537118 | 0.081008448 | no |
| DPY19L4   | -0.12071402  | -2.185478298 | 0.029571686 | 0.081092905 | no |
| BET3L     | 0.120709103  | 2.185387959  | 0.029578366 | 0.081095528 | no |
| MRPL45P2  | -0.120707761 | -2.185363301 | 0.029580189 | 0.081095528 | no |
| AAMP      | -0.12069946  | -2.185210785 | 0.02959147  | 0.081116107 | no |
| GAA       | 0.120686042  | 2.184964276  | 0.029609711 | 0.081155757 | no |
| PBXIP1    | 0.120623998  | 2.183824403  | 0.029694184 | 0.081376908 | no |
| PGAM4     | 0.120609559  | 2.183559141  | 0.029713872 | 0.081420479 | no |
| DIS3L     | -0.120601373 | -2.183408749 | 0.029725039 | 0.081440695 | no |
| CCDC75    | -0.120598491 | -2.183355802 | 0.029728971 | 0.081441086 | no |
| PPP1R16B  | -0.120592318 | -2.183242397 | 0.029737395 | 0.081449371 | no |
| KIAA1383  | 0.120590721  | 2.183213052  | 0.029739576 | 0.081449371 | no |
| DNAH9     | 0.120587405  | 2.183152139  | 0.029744102 | 0.081451387 | no |
| ZFHX4-AS1 | -0.120538039 | -2.182245229 | 0.029811557 | 0.081625706 | no |
| SNRNP35   | -0.120509039 | -2.181712454 | 0.029851246 | 0.081712742 | no |
| HES4      | -0.120507991 | -2.181693215 | 0.02985268  | 0.081712742 | no |
| ABCB4     | 0.120506479  | 2.181665436  | 0.029854751 | 0.081712742 | no |
| MUM1L1    | -0.120493962 | -2.181435484 | 0.029871897 | 0.08174926  | no |

|           |              |              |             |             |    |
|-----------|--------------|--------------|-------------|-------------|----|
| GLT25D2   | -0.120486205 | -2.181292972 | 0.029882527 | 0.08176794  | no |
| RIOK2     | -0.120475328 | -2.181093163 | 0.029897437 | 0.081798323 | no |
| FGFR10P   | 0.120454754  | 2.180715201  | 0.029925659 | 0.081865114 | no |
| DAB2IP    | -0.120425515 | -2.180178076 | 0.029965805 | 0.081964504 | no |
| TNFRSF18  | 0.120406329  | 2.17982562   | 0.029992173 | 0.082026188 | no |
| DHPS      | -0.120370966 | -2.179176004 | 0.030040825 | 0.082148795 | no |
| FAM201A   | -0.120360328 | -2.178980573 | 0.030055475 | 0.082178399 | no |
| ZNF532    | -0.120349022 | -2.178772879 | 0.030071051 | 0.082207574 | no |
| LINC00476 | -0.12034703  | -2.178736289 | 0.030073796 | 0.082207574 | no |
| KANK3     | -0.12032635  | -2.178356413 | 0.030102305 | 0.082275039 | no |
| TCF3      | -0.120315441 | -2.178156013 | 0.030117354 | 0.082305704 | no |
| EMCN      | 0.120291392  | 2.177714251  | 0.030150551 | 0.08238595  | no |
| NHS       | 0.120284455  | 2.177586818  | 0.030160133 | 0.082401655 | no |
| CCDC12    | 0.120281489  | 2.177532328  | 0.030164231 | 0.082402376 | no |
| ANKRD34B  | 0.120255979  | 2.17706373   | 0.030199493 | 0.082488219 | no |
| NAP1L1    | -0.120250127 | -2.176956241 | 0.030207587 | 0.082499841 | no |
| LYRM1     | -0.120244841 | -2.176859131 | 0.0302149   | 0.08250933  | no |
| TSNAX     | 0.120239346  | 2.176758202  | 0.030222503 | 0.082519606 | no |
| LPIN2     | 0.120235293  | 2.176683747  | 0.030228113 | 0.082524438 | no |
| XP05      | -0.120227154 | -2.176534232 | 0.030239381 | 0.082540751 | no |
| CATSPER2  | -0.120225428 | -2.176502541 | 0.03024177  | 0.082540751 | no |
| FLJ35024  | -0.120196758 | -2.175975892 | 0.03028149  | 0.082632646 | no |
| HS3ST3B1  | 0.120195576  | 2.175954182  | 0.030283129 | 0.082632646 | no |
| SPRYD3    | -0.120189671 | -2.17584572  | 0.030291315 | 0.082644491 | no |
| GUSBP2    | -0.120168605 | -2.175458764 | 0.030320537 | 0.082713717 | no |
| PRORSD1P  | 0.120148468  | 2.175088865  | 0.030348493 | 0.082773082 | no |
| MFSD5     | 0.120147381  | 2.175068915  | 0.030350002 | 0.082773082 | no |
| N4BP2L1   | 0.120120687  | 2.174578582  | 0.030387096 | 0.082863734 | no |
| LOC254100 | -0.120102989 | -2.174253494 | 0.030411711 | 0.082920336 | no |
| TUBB2B    | -0.120099574 | -2.174190779 | 0.030416462 | 0.082922769 | no |
| HUNK      | -0.120092899 | -2.174068158 | 0.030425752 | 0.082937575 | no |
| MPP3      | -0.120047621 | -2.173236493 | 0.030488828 | 0.083098973 | no |
| OGFOD1    | 0.120023428  | 2.172792134  | 0.030522575 | 0.083180404 | no |
| LINC00086 | -0.120006867 | -2.172487941 | 0.030545696 | 0.083232859 | no |
| FRAT2     | -0.119979329 | -2.171982136 | 0.030584175 | 0.083317433 | no |
| EMC9      | -0.119979105 | -2.171978022 | 0.030584488 | 0.083317433 | no |
| XP04      | -0.119974037 | -2.171884932 | 0.030591574 | 0.083326175 | no |
| TBC1D24   | -0.119970064 | -2.171811966 | 0.03059713  | 0.083330746 | no |
| PCDH8     | -0.119960892 | -2.171643494 | 0.03060996  | 0.083355125 | no |
| MLF2      | -0.119950691 | -2.171456136 | 0.030624234 | 0.08338343  | no |
| AMY1A     | -0.119917895 | -2.170853768 | 0.030670165 | 0.083497911 | no |
| FAM225B   | 0.11988604   | 2.170268691  | 0.030714834 | 0.083608929 | no |
| ZYG11B    | -0.119881116 | -2.170178255 | 0.030721744 | 0.083617147 | no |
| AKR7A2    | 0.119861807  | 2.169823619  | 0.030748852 | 0.083680331 | no |
| ST3GAL5   | -0.119858735 | -2.169767199 | 0.030753166 | 0.083681476 | no |
| USPL1     | -0.119840795 | -2.16943769  | 0.030778375 | 0.083739469 | no |
| TIPARP    | 0.119808673  | 2.168847733  | 0.030823554 | 0.083851773 | no |
| CYGB      | 0.119790843  | 2.168520272  | 0.030848656 | 0.083909438 | no |
| DDX17     | -0.119749536 | -2.16776163  | 0.030906878 | 0.084057165 | no |
| ZNF664    | -0.119708059 | -2.166999875 | 0.030965434 | 0.084205763 | no |
| FLJ21408  | 0.11969083   | 2.166683456  | 0.030989786 | 0.084261321 | no |

|           |              |              |             |             |    |
|-----------|--------------|--------------|-------------|-------------|----|
| SOX3      | -0.119677001 | -2.166429477 | 0.031009343 | 0.084303833 | no |
| SIVA1     | 0.119660388  | 2.166124372  | 0.031032852 | 0.084357075 | no |
| PROKR2    | -0.119636383 | -2.165683515 | 0.031066849 | 0.084428128 | no |
| LOC285000 | 0.11963595   | 2.165675557  | 0.031067462 | 0.084428128 | no |
| FOXN2     | -0.11963361  | -2.1656326   | 0.031070777 | 0.084428128 | no |
| CCDC154   | -0.119618232 | -2.165350173 | 0.031092575 | 0.084476679 | no |
| TARBP1    | -0.119604639 | -2.165100535 | 0.031111854 | 0.084518372 | no |
| SNX15     | -0.119597862 | -2.164976075 | 0.031121469 | 0.084533808 | no |
| LRRC10B   | -0.119586457 | -2.164766636 | 0.031137655 | 0.084567086 | no |
| PVALB     | -0.119580569 | -2.164658492 | 0.031146016 | 0.084579104 | no |
| NOC3L     | 0.119577635  | 2.164604616  | 0.031150182 | 0.084579729 | no |
| PAQR8     | -0.119563988 | -2.164353995 | 0.031169567 | 0.084621674 | no |
| PGLS      | 0.119557744  | 2.164239326  | 0.03117844  | 0.08462655  | no |
| DUSP5P1   | -0.119557182 | -2.164229005 | 0.031179239 | 0.08462655  | no |
| MAPK4     | 0.119529306  | 2.163717087  | 0.031218878 | 0.084723439 | no |
| SNORA52   | -0.119503618 | -2.16324534  | 0.031255446 | 0.084811967 | no |
| DEPDC7    | -0.119493061 | -2.163051471 | 0.031270484 | 0.084842062 | no |
| TMEM175   | -0.119485847 | -2.162918986 | 0.031280764 | 0.084859241 | no |
| NUDT12    | -0.119480134 | -2.16281407  | 0.031288908 | 0.084870619 | no |
| PTGIS     | 0.119472658  | 2.162676778  | 0.031299566 | 0.084888817 | no |
| ZNF500    | -0.119467307 | -2.162578522 | 0.031307197 | 0.084898797 | no |
| TSPEAR    | 0.119457344  | 2.162395569  | 0.031321408 | 0.08492662  | no |
| CREB3L4   | -0.119447783 | -2.162219981 | 0.031335053 | 0.084952899 | no |
| PTAFR     | 0.119437349  | 2.162028368  | 0.031349949 | 0.084982563 | no |
| CDC37L1   | -0.11943431  | -2.161972578 | 0.031354287 | 0.084983603 | no |
| STK24     | -0.119405021 | -2.161434714 | 0.031396138 | 0.085086307 | no |
| ALKBH6    | 0.119396676  | 2.161281467  | 0.031408071 | 0.085107914 | no |
| RAB37     | -0.119388134 | -2.16112462  | 0.031420289 | 0.085130285 | no |
| SMARCAD1  | -0.119373664 | -2.160858896 | 0.031440996 | 0.085175652 | no |
| CAMKK2    | -0.11936795  | -2.160753975 | 0.031449176 | 0.085187073 | no |
| KIAA1644  | -0.119350725 | -2.160437654 | 0.031473847 | 0.085243156 | no |
| LY86-AS1  | -0.119322541 | -2.159920124 | 0.031514247 | 0.08534182  | no |
| ISCU      | 0.119306132  | 2.159618807  | 0.03153779  | 0.08539481  | no |
| PEX11A    | -0.119303244 | -2.159565771 | 0.031541935 | 0.08539481  | no |
| FOPNL     | 0.119300597  | 2.159517156  | 0.031545735 | 0.08539481  | no |
| MASP2     | -0.11926973  | -2.158950357 | 0.031590071 | 0.08548911  | no |
| STAMBPL1  | 0.119269115  | 2.158939066  | 0.031590955 | 0.08548911  | no |
| ANGPTL2   | -0.119268037 | -2.15891927  | 0.031592504 | 0.08548911  | no |
| TBP       | -0.119263402 | -2.158834163 | 0.031599167 | 0.085496373 | no |
| STPG2     | 0.119251988  | 2.158624568  | 0.031615579 | 0.085530011 | no |
| YBEY      | -0.119232664 | -2.158269733 | 0.031643381 | 0.08559445  | no |
| MCF2      | -0.119218213 | -2.158004388 | 0.031664186 | 0.085639946 | no |
| CEPT1     | 0.119192092  | 2.157524734  | 0.031701823 | 0.085725258 | no |
| GPKOW     | -0.119190785 | -2.157500744 | 0.031703706 | 0.085725258 | no |
| CAPS      | 0.119176337  | 2.157235451  | 0.031724541 | 0.08577075  | no |
| NLGN4X    | -0.119173584 | -2.157184893 | 0.031728512 | 0.08577075  | no |
| ZNF629    | -0.119156217 | -2.156865996 | 0.031753575 | 0.085827704 | no |
| NAGS      | 0.119132216  | 2.156425301  | 0.031788237 | 0.08591059  | no |
| PLEC      | -0.119116396 | -2.156134828 | 0.031811102 | 0.085958765 | no |
| NUP133    | -0.119114349 | -2.156097234 | 0.031814063 | 0.085958765 | no |
| TMEM206   | -0.119101854 | -2.1558678   | 0.031832134 | 0.085996781 | no |

|              |              |              |             |             |    |
|--------------|--------------|--------------|-------------|-------------|----|
| VIPR1        | -0.11909475  | -2.155737362 | 0.031842412 | 0.086013736 | no |
| TMEM132A     | 0.119087987  | 2.155613194  | 0.031852199 | 0.086027076 | no |
| PPP4R1       | -0.119085806 | -2.155573136 | 0.031855357 | 0.086027076 | no |
| KIF5B        | -0.119075455 | -2.155383084 | 0.031870342 | 0.086054657 | no |
| NARS2        | -0.11907322  | -2.155342053 | 0.031873578 | 0.086054657 | no |
| TGFBR3       | 0.119061841  | 2.155133107  | 0.031890062 | 0.086088347 | no |
| LOC100289019 | -0.119046521 | -2.154851813 | 0.031912266 | 0.086137465 | no |
| CAPRN2       | 0.119036713  | 2.154671739  | 0.031926486 | 0.086165028 | no |
| ZNF614       | -0.11903305  | -2.154604486 | 0.031931799 | 0.086168544 | no |
| POLR2J2      | -0.118988019 | -2.153777672 | 0.031997172 | 0.086334116 | no |
| ZNF33B       | -0.118977877 | -2.153591447 | 0.032011913 | 0.086363045 | no |
| PART1        | -0.118974176 | -2.1535235   | 0.032017292 | 0.086366716 | no |
| ZNF300P1     | -0.118961915 | -2.153298374 | 0.032035122 | 0.086403967 | no |
| DRP2         | -0.118955785 | -2.153185823 | 0.032044039 | 0.086416719 | no |
| SPHK1        | 0.118953136  | 2.153137199  | 0.032047892 | 0.086416719 | no |
| TIMM8A       | -0.118931067 | -2.152731993 | 0.032080016 | 0.086476189 | no |
| JAZF1-AS1    | -0.118931057 | -2.152731809 | 0.032080031 | 0.086476189 | no |
| FAM120C      | -0.118929692 | -2.152706755 | 0.032082018 | 0.086476189 | no |
| SYT10        | -0.11892132  | -2.152553046 | 0.032094212 | 0.086492061 | no |
| KCNT2        | -0.118920123 | -2.15253107  | 0.032095956 | 0.086492061 | no |
| LOC100133161 | 0.118905003  | 2.152253459  | 0.03211799  | 0.086539081 | no |
| COPS2        | 0.118902624  | 2.152209781  | 0.032121458 | 0.086539081 | no |
| DENND6A      | 0.118880529  | 2.151804103  | 0.032153683 | 0.086615042 | no |
| LYSMD3       | 0.118854012  | 2.151317262  | 0.032192392 | 0.086708448 | no |
| FBX027       | -0.118850754 | -2.151257436 | 0.032197152 | 0.0867104   | no |
| SGK3         | -0.118790254 | -2.150146692 | 0.03228563  | 0.086937787 | no |
| FOXO3        | -0.118785965 | -2.15006795  | 0.03229191  | 0.086943804 | no |
| SMU1         | -0.118781315 | -2.149982563 | 0.032298722 | 0.086947674 | no |
| OPTC         | -0.118779459 | -2.149948503 | 0.032301439 | 0.086947674 | no |
| RTEL1-TNFRSF | -0.118776357 | -2.14989155  | 0.032305983 | 0.086948729 | no |
| GSPT2        | -0.118773668 | -2.149842181 | 0.032309923 | 0.086948729 | no |
| EPHA8        | -0.118763558 | -2.149656563 | 0.032324739 | 0.086977708 | no |
| DIEXF        | 0.118719181  | 2.148841842  | 0.032389837 | 0.087134835 | no |
| LOC643201    | -0.118718224 | -2.148824269 | 0.032391243 | 0.087134835 | no |
| DNAH5        | 0.118710501  | 2.148682481  | 0.032402584 | 0.087154434 | no |
| INTS1        | -0.118701163 | -2.148511054 | 0.0324163   | 0.087169247 | no |
| FAM101B      | 0.118700744  | 2.148503364  | 0.032416916 | 0.087169247 | no |
| PCDH11Y      | -0.118696544 | -2.148426259 | 0.032423087 | 0.087169247 | no |
| HPSE2        | -0.118695709 | -2.148410914 | 0.032424315 | 0.087169247 | no |
| PCMT1        | 0.118657373  | 2.147707129  | 0.032480692 | 0.087309888 | no |
| PVRL4        | 0.118652322  | 2.147614391  | 0.032488127 | 0.087318953 | no |
| SMPDL3B      | 0.11863649   | 2.14732375   | 0.032511438 | 0.087370679 | no |
| KIAA1671     | -0.118633603 | -2.147270735 | 0.032515692 | 0.087371185 | no |
| CITED2       | 0.118625139  | 2.14711535   | 0.032528162 | 0.087393766 | no |
| ZNF774       | -0.118622336 | -2.147063894 | 0.032532292 | 0.087393937 | no |
| EPHB3        | -0.118576762 | -2.146227253 | 0.032599513 | 0.087563572 | no |
| H1FX         | -0.118552357 | -2.145779219 | 0.03263556  | 0.087649441 | no |
| FAM24B       | -0.118543071 | -2.145608753 | 0.032649284 | 0.087675343 | no |
| RNF128       | 0.118529621  | 2.145361829  | 0.032669173 | 0.087714521 | no |
| RDH11        | -0.118527684 | -2.145326283 | 0.032672037 | 0.087714521 | no |
| SMIM15       | 0.118517078  | 2.145131574  | 0.032687728 | 0.087745685 | no |

|              |              |              |             |             |    |
|--------------|--------------|--------------|-------------|-------------|----|
| TPH2         | -0.118514183 | -2.145078423 | 0.032692012 | 0.087746226 | no |
| BICD1        | 0.118495961  | 2.144743913  | 0.032718988 | 0.087807663 | no |
| PEX5L        | -0.118485549 | -2.144552778 | 0.03273441  | 0.087838083 | no |
| TJP1         | -0.118478846 | -2.14442974  | 0.032744341 | 0.08785139  | no |
| SCAND2P      | -0.118476684 | -2.144390052 | 0.032747545 | 0.08785139  | no |
| FAM3A        | -0.118472446 | -2.144312247 | 0.032753827 | 0.087857275 | no |
| PAIP2        | -0.118463296 | -2.144144274 | 0.032767392 | 0.087882694 | no |
| MITD1        | 0.118457373  | 2.144035554  | 0.032776175 | 0.08789528  | no |
| ATP6V1B1     | -0.118405746 | -2.143087828 | 0.032852821 | 0.088089828 | no |
| TRIM13       | -0.118363682 | -2.142315668 | 0.032915382 | 0.088245647 | no |
| ENOSF1       | 0.118359953  | 2.142247224  | 0.032920932 | 0.088245647 | no |
| SURF6        | -0.118358396 | -2.142218631 | 0.032923251 | 0.088245647 | no |
| TUBB2A       | -0.118263652 | -2.140479487 | 0.033064563 | 0.088613359 | no |
| SCARNA16     | -0.118259217 | -2.140398088 | 0.03307119  | 0.088620067 | no |
| GTPBP4       | -0.118247131 | -2.140176227 | 0.033089257 | 0.088657428 | no |
| SPINK5       | -0.118228287 | -2.139830343 | 0.033117442 | 0.088721883 | no |
| LOC339535    | 0.118224715  | 2.139764763  | 0.033122788 | 0.088725145 | no |
| DIAPH1       | 0.118197177  | 2.139259284  | 0.03316402  | 0.088824521 | no |
| GSTT2B       | 0.118183285  | 2.139004291  | 0.033184837 | 0.088855187 | no |
| ADAT2        | -0.118182063 | -2.138981871 | 0.033186668 | 0.088855187 | no |
| KLKB1        | 0.118181259  | 2.138967106  | 0.033187873 | 0.088855187 | no |
| LOC100009676 | 0.11813186   | 2.138060374  | 0.033261992 | 0.089042535 | no |
| ARHGAP23     | -0.118128923 | -2.138006462 | 0.033266403 | 0.089043253 | no |
| SCML4        | 0.118124264  | 2.137920949  | 0.033273402 | 0.089045452 | no |
| ACAD8        | -0.118122859 | -2.137895167 | 0.033275512 | 0.089045452 | no |
| IARS2        | 0.118119128  | 2.137826682  | 0.033281118 | 0.089049365 | no |
| FAM76B       | -0.118095981 | -2.137401815 | 0.033315914 | 0.08913137  | no |
| CD36         | 0.118091023  | 2.137310827  | 0.033323369 | 0.089140221 | no |
| RPTOR        | -0.118070852 | -2.136940584 | 0.033353723 | 0.089210313 | no |
| BAMBI        | 0.118060649  | 2.136753317  | 0.033369085 | 0.089240294 | no |
| ACSS2        | -0.118055433 | -2.136657569 | 0.033376941 | 0.089250199 | no |
| RAB15        | -0.118043816 | -2.136444353 | 0.033394443 | 0.08928129  | no |
| CLUHP3       | -0.118042201 | -2.136414703 | 0.033396877 | 0.08928129  | no |
| LINC-ROR     | 0.118035895  | 2.136298972  | 0.033406381 | 0.089295588 | no |
| LOC339788    | -0.118020505 | -2.136016493 | 0.033429586 | 0.089346504 | no |
| LYST         | 0.118015549  | 2.135925527  | 0.033437062 | 0.089355373 | no |
| CES4A        | -0.11800843  | -2.135794856 | 0.033447804 | 0.089372964 | no |
| ANKRD20A8P   | -0.117985116 | -2.135366956 | 0.033482999 | 0.089455884 | no |
| SPG11        | 0.11796646   | 2.135024542  | 0.033511186 | 0.089520062 | no |
| LOC643406    | -0.117954035 | -2.134796497 | 0.033529969 | 0.089555814 | no |
| MYOM3        | 0.117952095  | 2.134760883  | 0.033532904 | 0.089555814 | no |
| TBXA2R       | 0.117944396  | 2.134619583  | 0.033544548 | 0.089575779 | no |
| NEUROD4      | -0.117939461 | -2.134529007 | 0.033552013 | 0.089584584 | no |
| ZNF503       | 0.11792797   | 2.134318107  | 0.033569403 | 0.08961988  | no |
| TRMT11       | -0.117894646 | -2.13370649  | 0.033619876 | 0.089739698 | no |
| MRPL38       | -0.117892826 | -2.133673075 | 0.033622635 | 0.089739698 | no |
| ITGA7        | 0.117887833  | 2.133581448  | 0.033630203 | 0.08974875  | no |
| OTUB1        | -0.11785847  | -2.133042524 | 0.033674742 | 0.089856455 | no |
| ZNF205       | -0.117849301 | -2.132874256 | 0.03368866  | 0.089882431 | no |
| ANKRD27      | 0.117844921  | 2.132793866  | 0.03369531  | 0.089889016 | no |
| COPG1        | 0.117833605  | 2.132586187  | 0.033712496 | 0.089923701 | no |

|              |              |              |             |             |    |
|--------------|--------------|--------------|-------------|-------------|----|
| PRAMEF20     | 0.117809756  | 2.132148478  | 0.033748744 | 0.089998045 | no |
| ADIPOQ       | 0.117809756  | 2.132148478  | 0.033748744 | 0.089998045 | no |
| T            | 0.117798771  | 2.131946866  | 0.03376545  | 0.090031426 | no |
| ATN1         | -0.117762154 | -2.13127484  | 0.03382119  | 0.090168863 | no |
| GATA5        | -0.11775639  | -2.131169056 | 0.033829972 | 0.090181086 | no |
| CDK9         | -0.117747919 | -2.131013593 | 0.03384288  | 0.090204309 | no |
| GYG2P1       | -0.117741204 | -2.130890353 | 0.033853116 | 0.090220402 | no |
| ITGA8        | 0.117731797  | 2.130717715  | 0.03386746  | 0.090236368 | no |
| TPI1P2       | 0.117731767  | 2.130717176  | 0.033867505 | 0.090236368 | no |
| C1orf168     | -0.117720397 | -2.130508499 | 0.033884849 | 0.090271389 | no |
| TRIM71       | -0.117710937 | -2.130334885 | 0.033899286 | 0.090298655 | no |
| SLC20A2      | -0.11770321  | -2.130193083 | 0.033911081 | 0.090318879 | no |
| FAM86B3P     | 0.117696805  | 2.130075532  | 0.033920861 | 0.090333733 | no |
| DCLRE1A      | -0.117691456 | -2.129977368 | 0.03392903  | 0.090344293 | no |
| PRPF19       | -0.117688298 | -2.129919417 | 0.033933854 | 0.090345943 | no |
| DSTNP2       | 0.117682151  | 2.129806596  | 0.033943246 | 0.090359755 | no |
| PSME3        | -0.117673058 | -2.12963973  | 0.033957142 | 0.09038555  | no |
| MIR448       | 0.117652544  | 2.129263245  | 0.033988511 | 0.090457844 | no |
| WNT5B        | -0.117648943 | -2.129197172 | 0.033994019 | 0.090458796 | no |
| MANBAL       | -0.117646807 | -2.12915797  | 0.033997287 | 0.090458796 | no |
| LOC100506023 | 0.11760808   | 2.12844726   | 0.034056585 | 0.090605357 | no |
| PCDHB19P     | -0.11758842  | -2.128086471 | 0.034086722 | 0.090674308 | no |
| MTR          | 0.117579599  | 2.127924596  | 0.034100251 | 0.09069907  | no |
| ACOT11       | 0.117560076  | 2.127566319  | 0.03413021  | 0.090767522 | no |
| HIST3H2BB    | -0.117546914 | -2.127324779 | 0.034150421 | 0.090810034 | no |
| QTRT1        | -0.117542507 | -2.127243909 | 0.03415719  | 0.090816796 | no |
| ECHDC2       | 0.117538015  | 2.127161467  | 0.034164092 | 0.09082391  | no |
| CPEB4        | -0.117518797 | -2.126808796 | 0.03419363  | 0.090891193 | no |
| SCAF1        | -0.117515932 | -2.126756213 | 0.034198036 | 0.090891662 | no |
| ASH2L        | -0.117497482 | -2.126417654 | 0.034226415 | 0.09094605  | no |
| ORC6         | -0.117497127 | -2.126411127 | 0.034226963 | 0.09094605  | no |
| ADPRHL2      | 0.117492062  | 2.126318178  | 0.034234758 | 0.090949044 | no |
| FRMD6-AS2    | -0.117488268 | -2.126248553 | 0.034240598 | 0.090949044 | no |
| KLF2         | 0.117484659  | 2.12618234   | 0.034246153 | 0.090949044 | no |
| ADRA2C       | -0.117483213 | -2.126155804 | 0.034248379 | 0.090949044 | no |
| BBC3         | 0.117482648  | 2.12614543   | 0.034249249 | 0.090949044 | no |
| TSC22D4      | -0.117473921 | -2.125985287 | 0.034262688 | 0.09097349  | no |
| HMBS         | -0.117431547 | -2.125207701 | 0.034328005 | 0.09113566  | no |
| OTUD1        | 0.117407125  | 2.124759539  | 0.0343657   | 0.091224463 | no |
| LOC100289650 | -0.117401283 | -2.124652335 | 0.034374722 | 0.091237143 | no |
| CATSPER2P1   | -0.117396999 | -2.124573719 | 0.034381339 | 0.091243438 | no |
| HIF1A        | 0.117379804  | 2.124258191  | 0.034407909 | 0.091302677 | no |
| MGC15885     | 0.117375817  | 2.124185037  | 0.034414072 | 0.091307756 | no |
| HEXIM1       | 0.117370369  | 2.12408506   | 0.034422496 | 0.091308325 | no |
| CHML         | -0.117370183 | -2.124081643 | 0.034422784 | 0.091308325 | no |
| DHRS7B       | 0.117361497  | 2.123922267  | 0.034436216 | 0.091332683 | no |
| ATP6V1A      | -0.117343313 | -2.12358859  | 0.034464354 | 0.091396031 | no |
| CALHM1       | -0.117327168 | -2.12329232  | 0.034489354 | 0.091451043 | no |
| ZBED4        | -0.117297958 | -2.122756328 | 0.034534621 | 0.091559776 | no |
| ZNF449       | 0.117291033  | 2.122629266  | 0.03454536  | 0.091576949 | no |
| TGM1         | -0.117286367 | -2.122543637 | 0.034552598 | 0.091584841 | no |



|              |              |              |             |             |    |
|--------------|--------------|--------------|-------------|-------------|----|
| MT1E         | 0.117279996  | 2.122426739  | 0.034562482 | 0.091599742 | no |
| SYT2         | -0.117267548 | -2.12219832  | 0.034581802 | 0.091629122 | no |
| NAT2         | 0.117267359  | 2.122194857  | 0.034582095 | 0.091629122 | no |
| RAD23A       | -0.11726085  | -2.122075424 | 0.034592201 | 0.091644599 | no |
| FARS2        | 0.117254426  | 2.121957536  | 0.034602178 | 0.091659733 | no |
| SEC16B       | 0.117248688  | 2.121852246  | 0.034611091 | 0.091672044 | no |
| CCND2        | -0.117230583 | -2.121520048 | 0.034639226 | 0.091735257 | no |
| COX10        | -0.117196316 | -2.120891282 | 0.034692532 | 0.091865107 | no |
| C12orf10     | -0.117184903 | -2.120681854 | 0.034710303 | 0.09190084  | no |
| LOC728724    | 0.117170965  | 2.120426111  | 0.034732014 | 0.091946996 | no |
| FAM115A      | -0.117136206 | -2.119788332 | 0.034786209 | 0.092079124 | no |
| GULP1        | -0.117122813 | -2.119542588 | 0.03480711  | 0.092123103 | no |
| RBBP8        | 0.117109635  | 2.119300792  | 0.034827686 | 0.0921605   | no |
| COMMD1       | 0.117108271  | 2.119275762  | 0.034829816 | 0.0921605   | no |
| CSNK1E       | -0.117097653 | -2.119080945 | 0.034846403 | 0.092193038 | no |
| GTPBP3       | -0.117078893 | -2.118736729 | 0.034875726 | 0.092244542 | no |
| C16orf59     | -0.117076191 | -2.118687153 | 0.034879951 | 0.092244542 | no |
| WEE2         | -0.117075987 | -2.118683406 | 0.034880271 | 0.092244542 | no |
| ST20         | 0.117073958  | 2.11864619   | 0.034883442 | 0.092244542 | no |
| APRT         | 0.117071472  | 2.118600567  | 0.034887331 | 0.092244542 | no |
| BPIFB3       | 0.117012644  | 2.1175212    | 0.034979444 | 0.092476716 | no |
| SMG1         | -0.117007145 | -2.117420307 | 0.034988065 | 0.09248813  | no |
| TTN-AS1      | 0.117001842  | 2.117323001  | 0.034996381 | 0.092498736 | no |
| DHX33        | -0.11697725  | -2.116871806 | 0.035034963 | 0.092589326 | no |
| MON1A        | -0.116972786 | -2.116789902 | 0.035041971 | 0.092596459 | no |
| OGDH         | -0.116944181 | -2.116265078 | 0.035086903 | 0.092703791 | no |
| SV2C         | -0.11693839  | -2.116158825 | 0.035096006 | 0.092716443 | no |
| FTSJD1       | 0.11691162   | 2.115667669  | 0.03513811  | 0.092816264 | no |
| AGAP2        | -0.116905309 | -2.115551885 | 0.035148042 | 0.092831088 | no |
| LOC100507472 | -0.116890119 | -2.115273186 | 0.035171958 | 0.09288284  | no |
| ITPR1        | -0.116873538 | -2.114968984 | 0.035198079 | 0.092940399 | no |
| CCL18        | 0.116867946  | 2.114866383  | 0.035206892 | 0.092947691 | no |
| NPAS1        | -0.116863621 | -2.114787041 | 0.035213709 | 0.092947691 | no |
| LOC387895    | 0.116863554  | 2.114785814  | 0.035213815 | 0.092947691 | no |
| TOB2P1       | 0.116851227  | 2.114559648  | 0.035233253 | 0.092987578 | no |
| COPG2        | -0.116813423 | -2.113866075 | 0.035292921 | 0.093133616 | no |
| TMEM53       | 0.11680989   | 2.113801263  | 0.035298501 | 0.093136905 | no |
| STYK1        | -0.116799422 | -2.113609204 | 0.035315042 | 0.093169109 | no |
| POLR3K       | -0.116795483 | -2.113536943 | 0.035321267 | 0.093170193 | no |
| TUBGCP4      | -0.116789575 | -2.113428555 | 0.035330605 | 0.093170193 | no |
| FAM200A      | -0.116786951 | -2.113380413 | 0.035334754 | 0.093170193 | no |
| ACTG1P4      | -0.116786471 | -2.113371609 | 0.035335513 | 0.093170193 | no |
| ABCA11P      | -0.116785449 | -2.113352853 | 0.035337129 | 0.093170193 | no |
| KIAA1841     | -0.116767148 | -2.1130171   | 0.035366076 | 0.093235076 | no |
| SNRNP48      | -0.116758698 | -2.112862081 | 0.035379448 | 0.093249695 | no |
| TMEM161B-AS1 | -0.11675816  | -2.112852211 | 0.035380299 | 0.093249695 | no |
| NTRK3-AS1    | -0.116735737 | -2.112440838 | 0.035415806 | 0.093331831 | no |
| ACBD4        | -0.116731828 | -2.112369123 | 0.035421999 | 0.093336707 | no |
| CLTCL1       | -0.116728729 | -2.112312272 | 0.035426909 | 0.0933382   | no |
| C20orf111    | 0.116696045  | 2.111712653  | 0.035478732 | 0.093463279 | no |
| RC3H2        | -0.11669286  | -2.111654215 | 0.035483786 | 0.093465136 | no |

|              |               |               |              |              |    |
|--------------|---------------|---------------|--------------|--------------|----|
| BCAP31       | 0. 116684543  | 2. 111501642  | 0. 035496984 | 0. 093488442 | no |
| LOC100505912 | -0. 116620515 | -2. 110327024 | 0. 035598736 | 0. 093733897 | no |
| ADI1         | 0. 116620409  | 2. 11032507   | 0. 035598905 | 0. 093733897 | no |
| FLYWCH2      | -0. 116605129 | -2. 110044766 | 0. 035623223 | 0. 093786438 | no |
| PPP5D1       | -0. 116575157 | -2. 109494931 | 0. 035670967 | 0. 09390063  | no |
| RQCD1        | 0. 116564218  | 2. 109294247  | 0. 035688406 | 0. 093935032 | no |
| RRN3P1       | -0. 116514584 | -2. 108383728 | 0. 035767622 | 0. 094132007 | no |
| USP12        | -0. 116503322 | -2. 108177143 | 0. 035785616 | 0. 094167832 | no |
| TMEM182      | 0. 11649589   | 2. 108040798  | 0. 035797497 | 0. 094187561 | no |
| PCSK5        | 0. 116486628  | 2. 107870893  | 0. 035812306 | 0. 094214991 | no |
| LOC100507634 | 0. 116474137  | 2. 107641767  | 0. 035832285 | 0. 094256015 | no |
| SPATA31C2    | -0. 116460971 | -2. 107400241 | 0. 035853356 | 0. 094299899 | no |
| MAP7D2       | -0. 11644385  | -2. 107086177 | 0. 035880771 | 0. 094360456 | no |
| TPSD1        | 0. 116394627  | 2. 106183225  | 0. 035959691 | 0. 094554124 | no |
| IKZF3        | 0. 116392432  | 2. 106142968  | 0. 035963213 | 0. 094554124 | no |
| ER01L        | 0. 116347059  | 2. 105310663  | 0. 036036096 | 0. 094726305 | no |
| ARHGEF12     | -0. 116346175 | -2. 10529445  | 0. 036037517 | 0. 094726305 | no |
| FBX05        | -0. 116318637 | -2. 104789305 | 0. 036081814 | 0. 094816022 | no |
| NFYC         | 0. 116317574  | 2. 104769816  | 0. 036083524 | 0. 094816022 | no |
| BRE          | 0. 116316729  | 2. 104754314  | 0. 036084884 | 0. 094816022 | no |
| RRP1         | -0. 116294835 | -2. 104352712 | 0. 036120138 | 0. 094897051 | no |
| C6orf163     | -0. 116271069 | -2. 10391677  | 0. 036158439 | 0. 094983348 | no |
| RPP25L       | -0. 11626897  | -2. 103878261 | 0. 036161824 | 0. 094983348 | no |
| DLGAP1-AS3   | -0. 116237248 | -2. 103296391 | 0. 036213004 | 0. 095106156 | no |
| LCMT2        | -0. 116209228 | -2. 102782437 | 0. 036258262 | 0. 095213382 | no |
| AMBP         | 0. 116145746  | 2. 101618035  | 0. 036360978 | 0. 095471444 | no |
| TTC1         | -0. 116133445 | -2. 101392403 | 0. 03638091  | 0. 095512111 | no |
| SLITRK3      | -0. 116127697 | -2. 101286983 | 0. 036390226 | 0. 095524899 | no |
| LIMCH1       | -0. 116081679 | -2. 100442926 | 0. 03646489  | 0. 095709202 | no |
| MEAF6        | 0. 11607528   | 2. 100325559  | 0. 036475282 | 0. 095724788 | no |
| ANKRD20A12P  | 0. 116056277  | 2. 099977006  | 0. 03650616  | 0. 095794126 | no |
| HERC3        | -0. 116042801 | -2. 099729835 | 0. 036528071 | 0. 095839918 | no |
| TBC1D16      | 0. 116029719  | 2. 099489908  | 0. 036549349 | 0. 095878017 | no |
| LOC644669    | -0. 116028389 | -2. 099465507 | 0. 036551514 | 0. 095878017 | no |
| BVES         | 0. 11602494   | 2. 099402248  | 0. 036557127 | 0. 095881036 | no |
| PFDN4        | -0. 116003652 | -2. 09901179  | 0. 036591785 | 0. 095960226 | no |
| ZKSCAN5      | -0. 115996249 | -2. 098876025 | 0. 036603843 | 0. 095973796 | no |
| SPAG17       | 0. 115994992  | 2. 098852962  | 0. 036605891 | 0. 095973796 | no |
| NDUFA12      | -0. 115967208 | -2. 098343379 | 0. 036651181 | 0. 096080815 | no |
| ATG9A        | -0. 115956179 | -2. 098141093 | 0. 036669172 | 0. 096110735 | no |
| LOC401134    | 0. 115954729  | 2. 098114499  | 0. 036671538 | 0. 096110735 | no |
| TEKT3        | 0. 115948746  | 2. 09800476   | 0. 036681302 | 0. 096124603 | no |
| CALM2        | -0. 115921129 | -2. 097498257 | 0. 036726397 | 0. 096231042 | no |
| CARD14       | -0. 115899703 | -2. 097105281 | 0. 036761417 | 0. 096311059 | no |
| CALML6       | 0. 115829356  | 2. 095815105  | 0. 036876593 | 0. 09660103  | no |
| FAM208B      | -0. 11581687  | -2. 095586109 | 0. 036897068 | 0. 096642841 | no |
| ZFP92        | -0. 115814139 | -2. 095536023 | 0. 036901547 | 0. 096642841 | no |
| FAM153B      | -0. 115805069 | -2. 095369676 | 0. 036916428 | 0. 096670033 | no |
| RNF152       | 0. 115798199  | 2. 09524368   | 0. 036927703 | 0. 096687776 | no |
| THAP11       | -0. 115779294 | -2. 094896968 | 0. 036958744 | 0. 096757262 | no |
| IL8          | 0. 115765226  | 2. 094638968  | 0. 036981856 | 0. 096805978 | no |

|              |              |              |             |             |    |
|--------------|--------------|--------------|-------------|-------------|----|
| UBAP1        | -0.115737471 | -2.094129954 | 0.037027493 | 0.096913634 | no |
| MIR218-1     | 0.115725962  | 2.093918888  | 0.03704643  | 0.096941872 | no |
| AS3MT        | -0.115725432 | -2.093909159 | 0.037047303 | 0.096941872 | no |
| TMEM223      | 0.115722379  | 2.09385318   | 0.037052327 | 0.096943215 | no |
| TRIM46       | -0.115695612 | -2.093362295 | 0.037096409 | 0.097046735 | no |
| C6orf52      | -0.115671935 | -2.092928082 | 0.037135439 | 0.097137016 | no |
| TMEM120B     | -0.115654256 | -2.092603864 | 0.037164605 | 0.097201475 | no |
| ZSCAN12      | -0.115627489 | -2.09211298  | 0.037208801 | 0.097297524 | no |
| LOC100507564 | 0.115626393  | 2.092092884  | 0.037210611 | 0.097297524 | no |
| HMHB1        | 0.11562379   | 2.092045153  | 0.037214911 | 0.097297524 | no |
| HEATR6       | -0.1156125   | -2.0918381   | 0.037233569 | 0.097334464 | no |
| ERCC1        | 0.115575569  | 2.091160846  | 0.037294653 | 0.097482289 | no |
| RBM27        | -0.115571294 | -2.091082451 | 0.037301729 | 0.097488928 | no |
| LINC00251    | 0.115565868  | 2.090982941  | 0.037310713 | 0.09750055  | no |
| FAHD2A       | -0.11554886  | -2.090671044 | 0.037338883 | 0.097553443 | no |
| ASB9         | 0.115548166  | 2.090658328  | 0.037340032 | 0.097553443 | no |
| IGF2BP2      | 0.115543061  | 2.090564708  | 0.037348491 | 0.097563684 | no |
| PIP5KL1      | -0.115515114 | -2.090052208 | 0.037394829 | 0.09766378  | no |
| RNF220       | -0.115513512 | -2.090022839 | 0.037397486 | 0.09766378  | no |
| CRHR1        | -0.115511731 | -2.089990163 | 0.037400443 | 0.09766378  | no |
| WDR53        | 0.115506278  | 2.089890166  | 0.037409491 | 0.09767554  | no |
| MALAT1       | -0.115498255 | -2.089743044 | 0.037422807 | 0.097698437 | no |
| C4orf21      | -0.115476411 | -2.089342484 | 0.037459081 | 0.09778126  | no |
| TCTEX1D1     | 0.115457438  | 2.088994549  | 0.037490614 | 0.097851687 | no |
| PTTG1IP      | 0.115453446  | 2.088921353  | 0.037497251 | 0.097857124 | no |
| LMBRD2       | -0.115433632 | -2.088558008 | 0.03753021  | 0.097928197 | no |
| COIL         | -0.115430631 | -2.088502989 | 0.037535203 | 0.097928197 | no |
| SNORD67      | 0.115428858  | 2.088470462  | 0.037538155 | 0.097928197 | no |
| ZNF610       | -0.115385073 | -2.087667562 | 0.037611087 | 0.09809691  | no |
| GOLGA6L5     | -0.115384551 | -2.087658004 | 0.037611956 | 0.09809691  | no |
| SNRNP70      | -0.115380859 | -2.087590293 | 0.037618112 | 0.098101061 | no |
| ZNF555       | -0.115376342 | -2.087507468 | 0.037625643 | 0.098108797 | no |
| MYCL1        | -0.115358707 | -2.087184095 | 0.037655061 | 0.098164763 | no |
| CCDC84       | 0.115357999  | 2.087171113  | 0.037656243 | 0.098164763 | no |
| NUDT1        | -0.115345558 | -2.086942972 | 0.037677009 | 0.098206987 | no |
| KLRC2        | -0.115325298 | -2.086571468 | 0.037710847 | 0.098283266 | no |
| PAFAH1B2     | -0.115322028 | -2.086511514 | 0.03771631  | 0.098285584 | no |
| OR2L3        | -0.115306341 | -2.086223873 | 0.03774253  | 0.098341987 | no |
| THSD7B       | 0.115303445  | 2.086170764  | 0.037747373 | 0.098342683 | no |
| PTPLAD1      | -0.115287184 | -2.085872597 | 0.037774572 | 0.098396691 | no |
| ZBTB49       | -0.115285578 | -2.085843136 | 0.03777726  | 0.098396691 | no |
| RPL18A       | -0.115282331 | -2.085783607 | 0.037782693 | 0.098398915 | no |
| OR4N4        | -0.115272302 | -2.0855997   | 0.03779948  | 0.098430708 | no |
| VHLL         | -0.115257811 | -2.085333985 | 0.037823747 | 0.098481965 | no |
| ZNF23        | -0.115239878 | -2.085005171 | 0.037853794 | 0.098548261 | no |
| OTC          | -0.115224312 | -2.084719746 | 0.037879893 | 0.098604262 | no |
| FBXL15       | -0.115207074 | -2.084403663 | 0.037908814 | 0.098667593 | no |
| ZNF174       | -0.115193612 | -2.084156832 | 0.037931411 | 0.098714452 | no |
| TAGAP        | 0.115188536  | 2.084063754  | 0.037939935 | 0.098724681 | no |
| STARD3NL     | 0.115171842  | 2.083757657  | 0.037967979 | 0.098785695 | no |
| SLC43A1      | 0.115166365  | 2.083657231  | 0.037977184 | 0.098797683 | no |

|              |              |              |             |             |    |
|--------------|--------------|--------------|-------------|-------------|----|
| UCN          | -0.115158323 | -2.083509784 | 0.037990702 | 0.098820888 | no |
| SLC47A2      | 0.11513432   | 2.083069672  | 0.038031076 | 0.098912173 | no |
| SH3BP4       | -0.115131988 | -2.083026916 | 0.038035    | 0.098912173 | no |
| CLEC14A      | 0.115124663  | 2.082892606  | 0.03804733  | 0.098932265 | no |
| DOLK         | 0.115104275  | 2.08251878   | 0.038081665 | 0.099009564 | no |
| PRR19        | -0.115062192 | -2.081747184 | 0.038152617 | 0.099182036 | no |
| STS          | 0.115059163  | 2.081691632  | 0.03815773  | 0.09918333  | no |
| ASAH2B       | -0.115017571 | -2.080929046 | 0.038227973 | 0.099353895 | no |
| NSMF         | -0.114993949 | -2.080495945 | 0.038267915 | 0.099445679 | no |
| PSG8         | 0.114988022  | 2.080387275  | 0.038277943 | 0.099448413 | no |
| TM4SF18      | 0.114987857  | 2.080384247  | 0.038278222 | 0.099448413 | no |
| ORMDL3       | -0.114960401 | -2.079880867 | 0.038324702 | 0.099557134 | no |
| LUZP1        | 0.114951023  | 2.079708925  | 0.038340589 | 0.099586367 | no |
| ZSWIM6       | -0.114899385 | -2.078762179 | 0.038428169 | 0.099801785 | no |
| ZNF527       | -0.11488015  | -2.078409517 | 0.038460836 | 0.099874555 | no |
| LOC400657    | -0.114868874 | -2.078202794 | 0.038479995 | 0.099912236 | no |
| GRAPL        | 0.114854719  | 2.077943264  | 0.038504061 | 0.099962644 | no |
| TAS2R5       | -0.114851113 | -2.077877158 | 0.038510193 | 0.099966487 | no |
| UBE2Q2P1     | -0.114835987 | -2.077599854 | 0.038535924 | 0.1000212   | no |
| CRX          | -0.114831025 | -2.077508868 | 0.03854437  | 0.100031041 | no |
| RGAG4        | -0.114808715 | -2.077099859 | 0.038582356 | 0.100117534 | no |
| ALMS1        | -0.11479981  | -2.076936592 | 0.038597528 | 0.100144812 | no |
| DBIL5P2      | -0.114796824 | -2.076881854 | 0.038602616 | 0.100145923 | no |
| DHX9         | -0.114789917 | -2.076755229 | 0.038614388 | 0.100155025 | no |
| USP13        | -0.114789297 | -2.076743856 | 0.038615445 | 0.100155025 | no |
| ZNF286A      | -0.114785357 | -2.076671615 | 0.038622163 | 0.10016036  | no |
| FMO3         | 0.114779978  | 2.076572999  | 0.038631335 | 0.100172058 | no |
| FBXO3        | -0.114759923 | -2.076205332 | 0.038665546 | 0.100248672 | no |
| RLTPR        | -0.114730907 | -2.075673371 | 0.03871509  | 0.10035622  | no |
| DYNC1I2      | -0.114730159 | -2.075659675 | 0.038716366 | 0.10035622  | no |
| ANXA13       | 0.114720283  | 2.075478607  | 0.038733243 | 0.100387858 | no |
| RASSF6       | 0.114703382  | 2.075168759  | 0.038762137 | 0.100450631 | no |
| CHST7        | 0.114698821  | 2.075085159  | 0.038769936 | 0.100456826 | no |
| RPP21        | -0.114696518 | -2.075042928 | 0.038773876 | 0.100456826 | no |
| LOC375295    | 0.114667175  | 2.074504996  | 0.038824097 | 0.100574814 | no |
| PPP2R1A      | -0.114642574 | -2.074053997 | 0.038866244 | 0.100671863 | no |
| PSMG4        | 0.114614493  | 2.073539215  | 0.038914399 | 0.100784449 | no |
| MSL2         | -0.114590675 | -2.073102566 | 0.038955286 | 0.100878184 | no |
| MEST         | -0.114584336 | -2.072986364 | 0.038966173 | 0.100894219 | no |
| RBP4         | -0.114574151 | -2.072799652 | 0.038983671 | 0.100927368 | no |
| CTXN3        | -0.114551884 | -2.07239146  | 0.03902195  | 0.101014302 | no |
| CDC40        | -0.114544407 | -2.072254386 | 0.039034812 | 0.101035426 | no |
| TAF9B        | -0.114539799 | -2.072169913 | 0.03904274  | 0.101043776 | no |
| PRKRIP1      | 0.114535569  | 2.072092371  | 0.039050018 | 0.101046528 | no |
| GPRASP1      | -0.114533716 | -2.07205841  | 0.039053206 | 0.101046528 | no |
| DNM2         | 0.114508986  | 2.071605057  | 0.039095787 | 0.101139514 | no |
| PIGP         | 0.114507378  | 2.071575579  | 0.039098557 | 0.101139514 | no |
| LOC100130705 | -0.114475494 | -2.070991096 | 0.039153515 | 0.101269491 | no |
| PSCA         | -0.114457503 | -2.070661309 | 0.039184554 | 0.101337576 | no |
| NSUN5        | 0.114449304  | 2.070511002  | 0.039198708 | 0.101358758 | no |
| NKRF         | -0.114447294 | -2.070474161 | 0.039202177 | 0.101358758 | no |

|            |       |               |               |              |              |    |
|------------|-------|---------------|---------------|--------------|--------------|----|
|            | 37226 | 0. 114444117  | 2. 070415923  | 0. 039207663 | 0. 101360746 | no |
| PHEX-AS1   |       | 0. 114430282  | 2. 070162306  | 0. 039231559 | 0. 101410324 | no |
| NOL3       |       | 0. 114426053  | 2. 070084791  | 0. 039238865 | 0. 101417011 | no |
| PGS1       |       | 0. 114400948  | 2. 069624597  | 0. 039282264 | 0. 101511462 | no |
| ZNF44      |       | -0. 114397781 | -2. 069566549 | 0. 039287741 | 0. 101511462 | no |
| MIPOL1     |       | -0. 114396719 | -2. 069547069 | 0. 039289579 | 0. 101511462 | no |
| TOP3B      |       | -0. 114383384 | -2. 069302627 | 0. 039312651 | 0. 101558864 | no |
| ZNF337     |       | -0. 114377256 | -2. 069190297 | 0. 039323258 | 0. 101574055 | no |
| PSENFEN    |       | 0. 114367219  | 2. 069006324  | 0. 039340634 | 0. 101599567 | no |
| C3orf17    |       | 0. 11436609   | 2. 068985625  | 0. 03934259  | 0. 101599567 | no |
| LINC00094  |       | -0. 114341997 | -2. 068543987 | 0. 039384332 | 0. 101684133 | no |
| GALNT1     |       | 0. 114341727  | 2. 068539038  | 0. 039384799 | 0. 101684133 | no |
| EIF4ENIF1  |       | -0. 114338129 | -2. 068473083 | 0. 039391037 | 0. 10168802  | no |
| LINC00652  |       | -0. 11432444  | -2. 068222145 | 0. 039414775 | 0. 101737079 | no |
| C10orf62   |       | -0. 114303746 | -2. 067842834 | 0. 039450679 | 0. 101808395 | no |
| EIF3A      |       | -0. 11429873  | -2. 067750874 | 0. 039459388 | 0. 101808395 | no |
| CALCOCO1   |       | -0. 114298396 | -2. 067744762 | 0. 039459967 | 0. 101808395 | no |
| MOGS       |       | 0. 114297598  | 2. 067730133  | 0. 039461353 | 0. 101808395 | no |
| ERAP1      |       | 0. 114288599  | 2. 067565185  | 0. 039476979 | 0. 101827695 | no |
| PSIMCT-1   |       | -0. 114287833 | -2. 067551133 | 0. 03947831  | 0. 101827695 | no |
| MPRIP      |       | 0. 11427556   | 2. 067326164  | 0. 039499631 | 0. 101870463 | no |
| NEU3       |       | -0. 11426872  | -2. 067200786 | 0. 039511518 | 0. 101888892 | no |
| SLC30A6    |       | 0. 114245616  | 2. 066777305  | 0. 039551689 | 0. 101980246 | no |
| NDUFS1     |       | 0. 114237992  | 2. 066637556  | 0. 039564953 | 0. 102002208 | no |
| KDM2B      |       | -0. 114212011 | -2. 06616132  | 0. 039610184 | 0. 102106568 | no |
| LINC00629  |       | -0. 114208096 | -2. 066089561 | 0. 039617003 | 0. 102111898 | no |
| PHF20      |       | -0. 114186003 | -2. 065684618 | 0. 039655502 | 0. 102198873 | no |
| KCNJ15     |       | 0. 114177949  | 2. 065536991  | 0. 039669546 | 0. 102222806 | no |
| NADKD1     |       | -0. 114170752 | -2. 065405074 | 0. 039682098 | 0. 102242893 | no |
| ZNF385B    |       | -0. 114148745 | -2. 065001696 | 0. 039720503 | 0. 102329576 | no |
| MRPL32     |       | 0. 114127209  | 2. 064606947  | 0. 039758116 | 0. 102414201 | no |
| PSKH1      |       | 0. 114120786  | 2. 064489223  | 0. 03976934  | 0. 102426284 | no |
| TYRO3      |       | -0. 114119069 | -2. 064457764 | 0. 039772339 | 0. 102426284 | no |
| CACNB4     |       | -0. 11406286  | -2. 063427513 | 0. 03987068  | 0. 10264441  | no |
| DCTN1-AS1  |       | -0. 11406284  | -2. 063427137 | 0. 039870715 | 0. 10264441  | no |
| PPP4R1L    |       | 0. 114062468  | 2. 063420323  | 0. 039871367 | 0. 10264441  | no |
| BIN3       |       | 0. 113995371  | 2. 062190537  | 0. 039989026 | 0. 102934982 | no |
| CNTN4      |       | -0. 113986213 | -2. 062022686 | 0. 040005108 | 0. 102964045 | no |
| C6orf147   |       | 0. 113970126  | 2. 061727843  | 0. 040033371 | 0. 103024449 | no |
| CNOT7      |       | -0. 113936619 | -2. 061113729 | 0. 040092292 | 0. 103163728 | no |
| DACT3-AS1  |       | -0. 113925509 | -2. 060910098 | 0. 040111846 | 0. 103193629 | no |
| DANCR      |       | -0. 11392456  | -2. 060892712 | 0. 040113516 | 0. 103193629 | no |
| FARSB      |       | -0. 113913382 | -2. 060687835 | 0. 040133199 | 0. 103217831 | no |
| LUC7L      |       | -0. 113912129 | -2. 060664867 | 0. 040135406 | 0. 103217831 | no |
| RPIA       |       | 0. 113908961  | 2. 060606802  | 0. 040140986 | 0. 103217831 | no |
| PP14571    |       | -0. 113908308 | -2. 060594838 | 0. 040142135 | 0. 103217831 | no |
| VPS26A     |       | 0. 113851821  | 2. 059559573  | 0. 040241737 | 0. 103461559 | no |
| CASP5      |       | 0. 113845643  | 2. 059446344  | 0. 040252644 | 0. 103477221 | no |
| RBMX       |       | -0. 11382648  | -2. 059095133 | 0. 040286489 | 0. 10355184  | no |
| HS6ST3     |       | -0. 113814318 | -2. 058872242 | 0. 040307981 | 0. 103587332 | no |
| ST6GALNAC2 |       | 0. 113813211  | 2. 058851961  | 0. 040309937 | 0. 103587332 | no |

|              |              |              |             |             |    |
|--------------|--------------|--------------|-------------|-------------|----|
| ARHGEF17     | -0.113767049 | -2.05800595  | 0.040391605 | 0.10376136  | no |
| NSUN7        | 0.113765232  | 2.05797264   | 0.040394823 | 0.10376136  | no |
| KLC4         | -0.113764951 | -2.057967503 | 0.04039532  | 0.10376136  | no |
| SLC35B4      | 0.113764019  | 2.057950417  | 0.040396971 | 0.10376136  | no |
| DGCR6L       | -0.113720699 | -2.057156499 | 0.040473747 | 0.103946139 | no |
| LOC100652768 | 0.113708679  | 2.056936217  | 0.040495071 | 0.103988478 | no |
| SH3GL1P2     | -0.113676455 | -2.05634566  | 0.040552287 | 0.104122964 | no |
| CAPN13       | -0.11366916  | -2.056211972 | 0.040565249 | 0.104134184 | no |
| MUSTN1       | -0.113668541 | -2.056200642 | 0.040566348 | 0.104134184 | no |
| ULK2         | -0.113664556 | -2.0561276   | 0.040573432 | 0.104139928 | no |
| THRAP3       | 0.113652435  | 2.055905464  | 0.040594981 | 0.104182795 | no |
| WDR12        | -0.113628734 | -2.055471118 | 0.040637144 | 0.104275543 | no |
| LOC100129620 | -0.113626666 | -2.055433227 | 0.040640824 | 0.104275543 | no |
| TMSB15A      | -0.113617437 | -2.05526409  | 0.040657254 | 0.104298145 | no |
| ZNF652       | -0.113616265 | -2.055242627 | 0.040659339 | 0.104298145 | no |
| CHN1         | -0.113605116 | -2.055038308 | 0.040679195 | 0.104336626 | no |
| ZMAT2        | -0.113570989 | -2.054412913 | 0.040740024 | 0.104480173 | no |
| UEVLD        | 0.11351735   | 2.053429949  | 0.040835787 | 0.104713267 | no |
| ZFC3H1       | -0.1135006   | -2.053123007 | 0.040865729 | 0.104777546 | no |
| HYAL1        | -0.113492884 | -2.052981593 | 0.040879531 | 0.104800428 | no |
| WWOX         | -0.113483767 | -2.052814533 | 0.04089584  | 0.104829735 | no |
| PSMB3        | 0.113453331  | 2.052256798  | 0.040950329 | 0.104950954 | no |
| PSMD11       | 0.113451898  | 2.052230535  | 0.040952897 | 0.104950954 | no |
| KIN          | -0.113428277 | -2.05179768  | 0.04099523  | 0.105046918 | no |
| ZNF431       | -0.113405143 | -2.051373758 | 0.041036727 | 0.105140712 | no |
| FBL          | -0.113384487 | -2.050995258 | 0.041073807 | 0.105223171 | no |
| TRPM4        | 0.113364665  | 2.050632029  | 0.041109418 | 0.105301848 | no |
| NAT16        | -0.113346316 | -2.050295795 | 0.041142406 | 0.105350267 | no |
| TTY18        | 0.11334627   | 2.050294953  | 0.041142488 | 0.105350267 | no |
| ARPC4-TTLL3  | 0.113345036  | 2.050272337  | 0.041144708 | 0.105350267 | no |
| HIST1H4C     | -0.113343245 | -2.05023952  | 0.041147929 | 0.105350267 | no |
| SOS1         | -0.11332597  | -2.049922978 | 0.041179009 | 0.105417282 | no |
| FAM47E       | -0.113319467 | -2.049803813 | 0.041190715 | 0.105434689 | no |
| LOC286189    | 0.113303741  | 2.049515646  | 0.041219033 | 0.105494609 | no |
| POTEA        | 0.113289878  | 2.049261625  | 0.041244009 | 0.105545964 | no |
| DNAJB6       | 0.113251944  | 2.048566535  | 0.041312419 | 0.105708442 | no |
| CST6         | 0.113237889  | 2.048308987  | 0.041337791 | 0.10576077  | no |
| C1orf145     | -0.113215272 | -2.047894572 | 0.041378645 | 0.105852691 | no |
| IZUMO1       | -0.113210093 | -2.047799669 | 0.041388005 | 0.105864035 | no |
| ZNF415       | -0.113201436 | -2.047641054 | 0.041403654 | 0.105891458 | no |
| GRIA1        | -0.113166476 | -2.047000479 | 0.041466902 | 0.1060406   | no |
| SFT2D1       | 0.1130955    | 2.045699993  | 0.041595562 | 0.106356957 | no |
| SRSF7        | 0.113044994  | 2.044774599  | 0.04168732  | 0.106570382 | no |
| BIVM-ERCC5   | -0.113044098 | -2.04475818  | 0.041688949 | 0.106570382 | no |
| FLJ27352     | 0.113040492  | 2.044692117  | 0.041695506 | 0.106574468 | no |
| ASAP3        | 0.113030374  | 2.044506725  | 0.041713913 | 0.106608836 | no |
| JMJD7        | -0.113010452 | -2.044141715 | 0.041750172 | 0.106672574 | no |
| NDUFS7       | -0.113007455 | -2.044086806 | 0.041755629 | 0.106672574 | no |
| CCDC85B      | -0.113006295 | -2.044065552 | 0.041757742 | 0.106672574 | no |
| ABHD11-AS1   | 0.113005765  | 2.044055841  | 0.041758707 | 0.106672574 | no |
| PTX3         | 0.112999434  | 2.043939837  | 0.041770238 | 0.106683856 | no |

|           |              |              |             |             |    |
|-----------|--------------|--------------|-------------|-------------|----|
| MRPL10    | -0.112995194 | -2.04386216  | 0.041777961 | 0.106683856 | no |
| DDIT3     | 0.112994335  | 2.043846419  | 0.041779526 | 0.106683856 | no |
| GRIK5     | -0.11299244  | -2.043811688 | 0.04178298  | 0.106683856 | no |
| ATXN3     | -0.112974086 | -2.043475421 | 0.04181643  | 0.106756581 | no |
| FAM8A1    | -0.112971076 | -2.043420262 | 0.041821919 | 0.106757913 | no |
| SORCS2    | -0.112945248 | -2.042947063 | 0.041869035 | 0.10686549  | no |
| MRPL1     | -0.112930105 | -2.042669603 | 0.041896682 | 0.106923358 | no |
| SAP130    | -0.112922836 | -2.042536438 | 0.041909957 | 0.106944535 | no |
| FOXD4     | -0.11290627  | -2.042232919 | 0.041940226 | 0.107009071 | no |
| ABCC4     | 0.112896121  | 2.042046966  | 0.04195878  | 0.107043703 | no |
| ZNF85     | -0.112885334 | -2.041849335 | 0.041978508 | 0.107081318 | no |
| SEC23A    | 0.112876011  | 2.041678536  | 0.041995563 | 0.10711211  | no |
| IRAK1BP1  | -0.112871223 | -2.041590806 | 0.042004325 | 0.107121746 | no |
| RPRD1B    | 0.112866545  | 2.041505097  | 0.042012887 | 0.107130869 | no |
| C1orf74   | 0.112839691  | 2.041013108  | 0.042062065 | 0.107243544 | no |
| ESYT2     | 0.112828949  | 2.040816307  | 0.04208175  | 0.107281007 | no |
| NCMAP     | 0.112786275  | 2.040034482  | 0.04216003  | 0.107467823 | no |
| LOC283710 | 0.112782993  | 2.039974361  | 0.042166055 | 0.107470433 | no |
| POMT2     | -0.112778892 | -2.039899219 | 0.042173586 | 0.107472179 | no |
| ARSB      | 0.112777173  | 2.039867735  | 0.042176742 | 0.107472179 | no |
| DOC2GP    | -0.112762335 | -2.039595887 | 0.042203999 | 0.107528884 | no |
| NPRL2     | -0.112749814 | -2.039366506 | 0.042227009 | 0.107574758 | no |
| PLA2G16   | 0.112743544  | 2.039251636  | 0.042238537 | 0.107591371 | no |
| RPS24     | -0.112738426 | -2.039157865 | 0.042247949 | 0.107602592 | no |
| INPP4A    | 0.112724916  | 2.038910359  | 0.0422728   | 0.107650111 | no |
| PGM5P2    | -0.112721471 | -2.03884725  | 0.042279139 | 0.107650111 | no |
| ATP1B1    | -0.112720115 | -2.038822411 | 0.042281634 | 0.107650111 | no |
| MMP7      | 0.112714504  | 2.038719609  | 0.042291961 | 0.107663651 | no |
| GNB1L     | -0.112704519 | -2.038536672 | 0.042310344 | 0.107697692 | no |
| MIR7-3HG  | -0.11269938  | -2.038442538 | 0.042319806 | 0.10770902  | no |
| ELSPBP1   | 0.112659765  | 2.037716781  | 0.042392818 | 0.107882067 | no |
| BACE1     | -0.112634939 | -2.037261973 | 0.042438627 | 0.107985854 | no |
| IWS1      | -0.112621934 | -2.037023729 | 0.042462639 | 0.108034164 | no |
| C7orf13   | -0.112572354 | -2.036115445 | 0.042554292 | 0.108254532 | no |
| PAPSS1    | -0.112564575 | -2.035972948 | 0.042568686 | 0.108278333 | no |
| DBNDD2    | -0.112549845 | -2.0357031   | 0.042595956 | 0.108334875 | no |
| PAX1      | -0.112533208 | -2.035398325 | 0.042626774 | 0.108400425 | no |
| ZNRF3     | -0.112507876 | -2.034934278 | 0.042673732 | 0.108507001 | no |
| EEFSEC    | -0.112491896 | -2.034641538 | 0.042703378 | 0.108560013 | no |
| NLN       | 0.112491193  | 2.034628653  | 0.042704683 | 0.108560013 | no |
| LDOC1     | -0.11248573  | -2.034528587 | 0.042714821 | 0.108572942 | no |
| UROS      | -0.112466262 | -2.034171953 | 0.04275097  | 0.108651974 | no |
| UBL5      | -0.11244439  | -2.033771288 | 0.042791612 | 0.108742407 | no |
| ZSCAN31   | -0.112423217 | -2.03338343  | 0.042830987 | 0.108829597 | no |
| LRRC8E    | 0.11241749   | 2.033278528  | 0.042841641 | 0.108843801 | no |
| CWC15     | -0.112365446 | -2.032325163 | 0.042938576 | 0.10907718  | no |
| NDUFAF4P1 | -0.112342288 | -2.031900958 | 0.042981768 | 0.109173995 | no |
| GRIP2     | -0.112329603 | -2.03166861  | 0.043005441 | 0.109221215 | no |
| LRRC42    | 0.112291696  | 2.030974235  | 0.043076253 | 0.109381797 | no |
| SLC12A9   | 0.112290308  | 2.030948804  | 0.043078848 | 0.109381797 | no |
| ZNF474    | 0.112263578  | 2.03045919   | 0.043128841 | 0.109495798 | no |

|           |              |              |             |             |    |
|-----------|--------------|--------------|-------------|-------------|----|
| MYOZ1     | -0.112249073 | -2.030193492 | 0.043155991 | 0.109551785 | no |
| PEX16     | -0.112212223 | -2.029518501 | 0.04322503  | 0.109714081 | no |
| RRN3P2    | 0.112169937  | 2.028743959  | 0.043304367 | 0.109902473 | no |
| GNB3      | -0.11215778  | -2.028521275 | 0.043327199 | 0.109947436 | no |
| LOC440518 | -0.112143043 | -2.028251347 | 0.043354889 | 0.110004713 | no |
| ARHGAP39  | -0.112122967 | -2.027883618 | 0.043392636 | 0.110087492 | no |
| ALDOB     | -0.112115994 | -2.027755896 | 0.043405753 | 0.110107772 | no |
| TBX15     | 0.11210379   | 2.027532363  | 0.043428718 | 0.1101491   | no |
| C1QL3     | -0.112101889 | -2.027497549 | 0.043432296 | 0.1101491   | no |
| ZMYND10   | 0.112053997  | 2.026620339  | 0.043522523 | 0.110358288 | no |
| YIPF7     | 0.112052657  | 2.026595797  | 0.04352505  | 0.110358288 | no |
| DNAJC28   | -0.112047437 | -2.026500196 | 0.043534893 | 0.110370225 | no |
| ARG2      | 0.112040848  | 2.026379508  | 0.043547323 | 0.110388713 | no |
| ALKBH4    | -0.112034322 | -2.026259978 | 0.043559635 | 0.110406902 | no |
| NAA25     | -0.112007679 | -2.025771984 | 0.043609934 | 0.110521356 | no |
| PCLO      | -0.112002724 | -2.025681229 | 0.043619294 | 0.110532042 | no |
| FIS1      | -0.111985575 | -2.025367127 | 0.043651702 | 0.110601122 | no |
| ZNF233    | -0.11197584  | -2.025188837 | 0.043670106 | 0.110634709 | no |
| BMPR2     | -0.111954844 | -2.024804278 | 0.043709824 | 0.110722281 | no |
| EPN2-AS1  | -0.111929701 | -2.02434378  | 0.043757427 | 0.110829801 | no |
| SEC23IP   | 0.111909045  | 2.023965454  | 0.043796568 | 0.110915866 | no |
| AP2A1     | -0.11190262  | -2.023847781 | 0.043808748 | 0.11093364  | no |
| ETF1      | 0.111879885  | 2.023431394  | 0.043851871 | 0.111029756 | no |
| TPM3P9    | 0.111874237  | 2.023327941  | 0.043862591 | 0.111043815 | no |
| ANO4      | -0.111867439 | -2.023203442 | 0.043875495 | 0.111055917 | no |
| SPDYE7P   | -0.111866274 | -2.023182103 | 0.043877707 | 0.111055917 | no |
| RSRC1     | -0.11186092  | -2.023084053 | 0.043887872 | 0.111068242 | no |
| CDSN      | 0.111856853  | 2.023009555  | 0.043895596 | 0.111068242 | no |
| GID4      | -0.111855545 | -2.022985597 | 0.043898081 | 0.111068242 | no |
| STRA13    | -0.111850591 | -2.022894874 | 0.043907489 | 0.11106952  | no |
| RMDN3     | -0.111849837 | -2.022881063 | 0.043908922 | 0.11106952  | no |
| GARS      | 0.111846306  | 2.022816383  | 0.043915631 | 0.111073418 | no |
| PTP4A3    | 0.111786276  | 2.021716962  | 0.044029807 | 0.111339272 | no |
| LGI2      | 0.111785594  | 2.021704477  | 0.044031105 | 0.111339272 | no |
| TMEM45A   | 0.111780023  | 2.021602445  | 0.044041714 | 0.111352997 | no |
| FAM196A   | -0.111761104 | -2.021255952 | 0.044077758 | 0.111431019 | no |
| RAF1      | -0.111757539 | -2.02119066  | 0.044084553 | 0.111435089 | no |
| BCL2L2    | -0.111724724 | -2.020589689 | 0.044147136 | 0.11158016  | no |
| LRRC28    | 0.111720123  | 2.020505426  | 0.044155917 | 0.111586823 | no |
| PCDHA13   | -0.111717902 | -2.020464747 | 0.044160157 | 0.111586823 | no |
| RNF219    | -0.111695589 | -2.02005611  | 0.044202765 | 0.111681357 | no |
| PAX6      | -0.111671976 | -2.01962367  | 0.044247893 | 0.111782234 | no |
| HERC2P2   | -0.111659185 | -2.019389421 | 0.044272355 | 0.111830885 | no |
| LOC283332 | -0.111646786 | -2.01916235  | 0.044296078 | 0.111877659 | no |
| DAP3      | 0.111594397  | 2.01820292   | 0.044396432 | 0.112117947 | no |
| MSMO1     | -0.111582375 | -2.01798277  | 0.044419487 | 0.112162988 | no |
| ASMTL     | 0.111559729  | 2.017568051  | 0.044462945 | 0.112259532 | no |
| ARRB1     | -0.111545967 | -2.017316027 | 0.044489371 | 0.11231306  | no |
| TFDP2     | -0.111506033 | -2.016584727 | 0.044566129 | 0.112493621 | no |
| TAF5L     | -0.1114947   | -2.01637718  | 0.044587934 | 0.112535442 | no |
| NARS      | -0.111484104 | -2.016183148 | 0.044608327 | 0.112573692 | no |



|              |              |              |             |             |    |
|--------------|--------------|--------------|-------------|-------------|----|
| ARID1B       | -0.111459915 | -2.015740177 | 0.044654914 | 0.112678027 | no |
| SIAH2        | 0.111427808  | 2.01515223   | 0.044716811 | 0.112813766 | no |
| C2orf91      | 0.111423485  | 2.015073067  | 0.044725151 | 0.112813766 | no |
| CCDC66       | -0.111423318 | -2.015070015 | 0.044725472 | 0.112813766 | no |
| GABRQ        | -0.111421124 | -2.015029836 | 0.044729706 | 0.112813766 | no |
| PHC2         | 0.111403812  | 2.01471282   | 0.044763118 | 0.112884789 | no |
| LHB          | 0.111400472  | 2.014651659  | 0.044769567 | 0.112887805 | no |
| ARFGAP3      | 0.111394482  | 2.014541965  | 0.044781135 | 0.112903727 | no |
| C16orf13     | -0.111374963 | -2.014184527 | 0.044818846 | 0.112985551 | no |
| HAUS3        | -0.111335162 | -2.013455711 | 0.044895823 | 0.113166331 | no |
| KCNH5        | -0.111330386 | -2.013368261 | 0.044905067 | 0.113176357 | no |
| CFL2         | -0.111319817 | -2.013174725 | 0.044925531 | 0.11321379  | no |
| AOX1         | 0.111317275  | 2.013128161  | 0.044930455 | 0.11321379  | no |
| ACYP1        | -0.111312679 | -2.013044002 | 0.044939357 | 0.113222945 | no |
| LAYN         | 0.111277094  | 2.012392394  | 0.045008331 | 0.113383246 | no |
| DIS3L2       | -0.111274411 | -2.012343275 | 0.045013534 | 0.113383246 | no |
| HSPA9        | -0.111269576 | -2.012254743 | 0.045022913 | 0.113385804 | no |
| FAU          | -0.111267876 | -2.012223611 | 0.045026211 | 0.113385804 | no |
| ZDHHC14      | 0.111265729  | 2.012184295  | 0.045030377 | 0.113385804 | no |
| USP25        | 0.111250662  | 2.011908404  | 0.04505962  | 0.113446145 | no |
| TGFB1I1      | 0.111246556  | 2.011833208  | 0.045067593 | 0.113452927 | no |
| CDADC1       | -0.111222952 | -2.011400997 | 0.045113444 | 0.11355505  | no |
| LOC283692    | -0.111203862 | -2.011051454 | 0.045150554 | 0.113631526 | no |
| RAB7L1       | 0.111201884  | 2.011015227  | 0.045154401 | 0.113631526 | no |
| ZNF788       | 0.111195299  | 2.010894655  | 0.045167209 | 0.113650449 | no |
| RPL21        | -0.111189099 | -2.010781131 | 0.045179271 | 0.11366749  | no |
| LRRN2        | -0.111184689 | -2.010700381 | 0.045187852 | 0.113675772 | no |
| TBC1D30      | -0.111135534 | -2.009800321 | 0.045283594 | 0.113903292 | no |
| ABI2         | -0.111116406 | -2.009450084 | 0.045320897 | 0.113983778 | no |
| PLA2G4E      | -0.111106105 | -2.009261461 | 0.045340997 | 0.1140201   | no |
| FUT1         | -0.111103567 | -2.009214996 | 0.045345949 | 0.1140201   | no |
| C14orf142    | 0.111089766  | 2.0089623    | 0.045372892 | 0.114074499 | no |
| SDR16C5      | -0.111074808 | -2.00868842  | 0.045402108 | 0.114134601 | no |
| RASSF7       | 0.111049527  | 2.008225518  | 0.045451525 | 0.114245464 | no |
| LIPA         | 0.111034179  | 2.0079445    | 0.045481547 | 0.114298798 | no |
| SLTM         | -0.11103144  | -2.007894353 | 0.045486906 | 0.114298798 | no |
| PHLDB3       | 0.111030524  | 2.007877579  | 0.045488698 | 0.114298798 | no |
| SETD1A       | -0.11101134  | -2.00752632  | 0.045526253 | 0.11437904  | no |
| FICD         | 0.111008774  | 2.007479341  | 0.045531278 | 0.11437904  | no |
| ZNF430       | -0.110999091 | -2.007302052 | 0.045550244 | 0.114413312 | no |
| LOC100131626 | -0.110992988 | -2.00719031  | 0.045562202 | 0.114427939 | no |
| LRRC57       | -0.110990684 | -2.007148129 | 0.045566716 | 0.114427939 | no |
| KIAA0226L    | 0.110987308  | 2.007086311  | 0.045573333 | 0.114431184 | no |
| MUC6         | -0.110978776 | -2.0069301   | 0.045590057 | 0.114459804 | no |
| MIR497HG     | -0.110962398 | -2.00663022  | 0.045622178 | 0.114527067 | no |
| SPRED1       | 0.110954272  | 2.006481451  | 0.04563812  | 0.114553706 | no |
| CHCHD7       | 0.110936766  | 2.006160929  | 0.045672482 | 0.114615413 | no |
| TUBGCP2      | -0.110936314 | -2.006152649 | 0.04567337  | 0.114615413 | no |
| ACSBG1       | -0.110931941 | -2.006072574 | 0.045681958 | 0.114623581 | no |
| C4BPA        | 0.110914394  | 2.005751307  | 0.045716429 | 0.114696682 | no |
| F7           | -0.110899109 | -2.005471453 | 0.045746474 | 0.114748843 | no |

|              |              |              |             |             |    |
|--------------|--------------|--------------|-------------|-------------|----|
| CNN1         | 0.110898384  | 2.005458187  | 0.045747899 | 0.114748843 | no |
| LOC100132735 | 0.110865627  | 2.004858454  | 0.045812344 | 0.11489708  | no |
| SRSF1        | -0.110860467 | -2.00476397  | 0.045822504 | 0.114906925 | no |
| NDUFA4L2     | 0.110857084  | 2.004702025  | 0.045829166 | 0.114906925 | no |
| DARS2        | 0.110855487  | 2.004672795  | 0.045832309 | 0.114906925 | no |
| MVB12B       | -0.110850595 | -2.004583233 | 0.045841944 | 0.114912331 | no |
| HRH4         | 0.110848962  | 2.004553339  | 0.04584516  | 0.114912331 | no |
| AKAP3        | -0.110830035 | -2.004206805 | 0.045882455 | 0.114992157 | no |
| RPS21        | -0.11082737  | -2.004158006 | 0.045887708 | 0.114992157 | no |
| SLC7A4       | -0.110815888 | -2.003947792 | 0.045910347 | 0.115035474 | no |
| NT5DC3       | -0.110810683 | -2.003852509 | 0.045920611 | 0.11504778  | no |
| HOTAIRM1     | 0.110803701  | 2.003724677  | 0.045934385 | 0.115068874 | no |
| MPV17L       | 0.110771706  | 2.003138899  | 0.045997547 | 0.115213668 | no |
| SLC35F1      | -0.1107608   | -2.002939237 | 0.046019092 | 0.115235723 | no |
| KCNAB3       | -0.110759442 | -2.002914363 | 0.046021777 | 0.115235723 | no |
| KIAA0907     | -0.110757123 | -2.002871904 | 0.04602636  | 0.115235723 | no |
| MLIP         | 0.110756394  | 2.002858565  | 0.0460278   | 0.115235723 | no |
| RBM5         | -0.110753317 | -2.002802224 | 0.046033882 | 0.115237526 | no |
| TTC5         | -0.110734907 | -2.002465176 | 0.046070282 | 0.115315214 | no |
| SLC26A11     | -0.110728388 | -2.002345825 | 0.046083177 | 0.115334059 | no |
| CLSTN1       | -0.110708746 | -2.001986234 | 0.046122048 | 0.115400709 | no |
| WNT7A        | -0.110708562 | -2.00198287  | 0.046122412 | 0.115400709 | no |
| DEFB131      | -0.110706792 | -2.001950452 | 0.046125917 | 0.115400709 | no |
| MTRNR2L10    | -0.110700709 | -2.001839085 | 0.046137962 | 0.115417407 | no |
| TUBB3        | -0.110682578 | -2.001507163 | 0.046173877 | 0.115493806 | no |
| POLI         | -0.110674887 | -2.001366346 | 0.046189121 | 0.115518491 | no |
| RASD2        | -0.110624629 | -2.00044626  | 0.046288827 | 0.115736245 | no |
| CLCN6        | 0.110620328  | 2.000367524  | 0.046297368 | 0.115736245 | no |
| DMXL1        | -0.110620245 | -2.000366005 | 0.046297533 | 0.115736245 | no |
| BHLHB9       | -0.110620146 | -2.000364195 | 0.046297729 | 0.115736245 | no |
| KIAA0930     | -0.11060136  | -2.000020271 | 0.046335052 | 0.115816074 | no |
| PHLDA2       | 0.110576889  | 1.999572285  | 0.046383706 | 0.11592212  | no |
| CAPN2        | 0.110574597  | 1.999530313  | 0.046388266 | 0.11592212  | no |
| GPR64        | 0.110562806  | 1.999314469  | 0.046411726 | 0.115967259 | no |
| STRAP        | -0.110537629 | -1.998853559 | 0.046461854 | 0.116072336 | no |
| CECR5        | -0.11053626  | -1.998828498 | 0.046464581 | 0.116072336 | no |
| FAM50B       | 0.110515617  | 1.998450589  | 0.046505718 | 0.116161597 | no |
| RAB17        | 0.110512434  | 1.998392319  | 0.046512064 | 0.116163946 | no |
| SMPX         | -0.110507438 | -1.998300856 | 0.046522026 | 0.116175325 | no |
| CREG2        | -0.11049402  | -1.998055225 | 0.046548788 | 0.116228652 | no |
| CYP2C9       | 0.110487057  | 1.997927754  | 0.046562682 | 0.116248721 | no |
| SRP68        | -0.11048457  | -1.997882232 | 0.046567644 | 0.116248721 | no |
| NKAP         | 0.11045699   | 1.99737734   | 0.046622714 | 0.116368647 | no |
| GP1BA        | -0.110455088 | -1.997342517 | 0.046626514 | 0.116368647 | no |
| WDR74        | -0.110439168 | -1.99705108  | 0.046658329 | 0.116434528 | no |
| CDHR4        | 0.110413305  | 1.996577641  | 0.046710052 | 0.116545513 | no |
| TMC3         | -0.110411507 | -1.996544725 | 0.04671365  | 0.116545513 | no |
| TMEM14C      | 0.110403567  | 1.996399373  | 0.04672954  | 0.116571624 | no |
| SLC16A8      | -0.110367349 | -1.995736376 | 0.046802079 | 0.116739029 | no |
| NR5A2        | 0.110360103  | 1.995603743  | 0.046816601 | 0.116761701 | no |
| ATE1         | -0.11035652  | -1.995538141 | 0.046823786 | 0.116766069 | no |

|              |              |              |             |             |    |
|--------------|--------------|--------------|-------------|-------------|----|
| LEPREL2      | 0.110328703  | 1.995028936  | 0.046879585 | 0.116887822 | no |
| RRP7A        | -0.110326758 | -1.99499334  | 0.046883487 | 0.116887822 | no |
| COL5A3       | 0.11032098   | 1.994887578  | 0.046895085 | 0.116903174 | no |
| FNIP1        | -0.110312681 | -1.994735651 | 0.046911748 | 0.116931151 | no |
| LAMP5        | -0.110300807 | -1.99451829  | 0.046935598 | 0.11697703  | no |
| PINK1        | -0.110297536 | -1.994458418 | 0.046942169 | 0.116979841 | no |
| SOST         | 0.110283701  | 1.994205173  | 0.046969971 | 0.117035554 | no |
| NARG2        | -0.110278108 | -1.994102796 | 0.046981215 | 0.117049999 | no |
| SNRPN        | -0.110244224 | -1.99348254  | 0.047049383 | 0.117206247 | no |
| PROM2        | -0.110241266 | -1.993428392 | 0.047055338 | 0.117207496 | no |
| LOC100128554 | -0.110228403 | -1.993192938 | 0.04708124  | 0.117258423 | no |
| MIR3940      | 0.110208873  | 1.992835451  | 0.047120589 | 0.117334168 | no |
| PCOLCE-AS1   | 0.110207889  | 1.992817441  | 0.047122573 | 0.117334168 | no |
| WDR45B       | -0.110180432 | -1.992314858 | 0.047177942 | 0.117458428 | no |
| CLCN4        | -0.110157607 | -1.991897047 | 0.047224014 | 0.117558465 | no |
| HNRNPUL1     | -0.110155107 | -1.991851283 | 0.047229063 | 0.117558465 | no |
| ADPRHL1      | -0.110146931 | -1.991701625 | 0.047245576 | 0.11758595  | no |
| SLC35F3      | -0.110134913 | -1.991481651 | 0.047269857 | 0.117632759 | no |
| HCFC1        | -0.110113834 | -1.991095816 | 0.047312472 | 0.117725175 | no |
| ABT1         | 0.11009198   | 1.990695795  | 0.047356688 | 0.117821554 | no |
| C5orf24      | -0.110068997 | -1.990275127 | 0.047403224 | 0.117923681 | no |
| EIF3F        | -0.110066263 | -1.990225086 | 0.047408762 | 0.117923808 | no |
| ZSWIM7       | -0.110021953 | -1.989414042 | 0.0474986   | 0.118133597 | no |
| ZNF280D      | 0.110010426  | 1.989203053  | 0.047521994 | 0.118178105 | no |
| AJUBA        | 0.109986324  | 1.988761917  | 0.047570939 | 0.118286134 | no |
| OR14I1       | -0.109968326 | -1.988432498 | 0.047607516 | 0.118363389 | no |
| SLIRP        | -0.109962932 | -1.988333768 | 0.047618484 | 0.118376961 | no |
| TRAF5        | 0.109958418  | 1.988251151  | 0.047627663 | 0.118386086 | no |
| ATF3         | 0.10994929   | 1.988084068  | 0.047646231 | 0.118418543 | no |
| ZNF831       | 0.109919308  | 1.987535307  | 0.047707257 | 0.118542954 | no |
| TMX4         | 0.109919277  | 1.987534745  | 0.04770732  | 0.118542954 | no |
| HDAC9        | -0.109889876 | -1.986996626 | 0.047767227 | 0.11867809  | no |
| CAPN11       | 0.109879944  | 1.986814837  | 0.04778748  | 0.118714683 | no |
| QRICH1       | -0.109869929 | -1.986631541 | 0.047807907 | 0.118751703 | no |
| PPP6R2       | -0.109857344 | -1.986401197 | 0.047833589 | 0.118801763 | no |
| SNX7         | 0.109835313  | 1.985997975  | 0.047878573 | 0.118899746 | no |
| TULP4        | -0.109826794 | -1.985842065 | 0.047895976 | 0.118929222 | no |
| PRRT2        | -0.109787232 | -1.985117988 | 0.047976869 | 0.119116323 | no |
| TTC29        | 0.109763681  | 1.98468696   | 0.048025078 | 0.119209856 | no |
| RASA2        | 0.109762897  | 1.98467261   | 0.048026684 | 0.119209856 | no |
| RIT2         | -0.109760611 | -1.984630774 | 0.048031365 | 0.119209856 | no |
| PPFIA2       | -0.109757992 | -1.984582843 | 0.048036729 | 0.119209856 | no |
| SDHAP2       | -0.10975059  | -1.984447371 | 0.048051893 | 0.119233718 | no |
| VMAC         | 0.109742506  | 1.984299424  | 0.048068458 | 0.119261051 | no |
| MAP1B        | 0.109736324  | 1.98418628   | 0.048081129 | 0.119278718 | no |
| KIRREL3-AS3  | -0.109721666 | -1.983918001 | 0.048111185 | 0.119327108 | no |
| RPS13        | -0.109721395 | -1.983913053 | 0.048111739 | 0.119327108 | no |
| GJC3         | -0.109667944 | -1.982934808 | 0.048221471 | 0.119585465 | no |
| POLE         | -0.109660062 | -1.98279057  | 0.048237669 | 0.11961183  | no |
| CUBN         | 0.109641205  | 1.98244546   | 0.048276442 | 0.119694163 | no |
| MRPS36       | -0.109615307 | -1.9819715   | 0.048329734 | 0.119807843 | no |

|             |              |              |             |             |    |
|-------------|--------------|--------------|-------------|-------------|----|
| SOX5        | -0.109613506 | -1.981938536 | 0.048333442 | 0.119807843 | no |
| LOC645166   | 0.109602008  | 1.981728099  | 0.048357121 | 0.119852715 | no |
| MIR222      | 0.109599023  | 1.981673472  | 0.04836327  | 0.119854131 | no |
| RAC1        | 0.109576933  | 1.981269211  | 0.048408791 | 0.119944091 | no |
| CHRDL1      | -0.109575991 | -1.981251974 | 0.048410732 | 0.119944091 | no |
| ST3GAL4     | 0.109568662  | 1.981117853  | 0.048425843 | 0.1199677   | no |
| ZNF420      | -0.109549419 | -1.980765687 | 0.04846554  | 0.120052203 | no |
| LNX1-AS2    | 0.109531596  | 1.980439509  | 0.048502331 | 0.120129491 | no |
| MAP7        | -0.109521986 | -1.980263651 | 0.048522177 | 0.120164796 | no |
| ENO1        | 0.109513225  | 1.980103312  | 0.048540277 | 0.120195771 | no |
| FAM86A      | 0.109488732  | 1.979655085  | 0.048590907 | 0.120307279 | no |
| PPIAL4G     | 0.109483856  | 1.979565851  | 0.048600992 | 0.120314385 | no |
| MAGI3       | -0.109481931 | -1.97953062  | 0.048604974 | 0.120314385 | no |
| C2orf73     | 0.109473334  | 1.979373294  | 0.04862276  | 0.12034455  | no |
| PTCHD4      | 0.109449367  | 1.978934691  | 0.048672373 | 0.120453473 | no |
| COPZ1       | -0.109446297 | -1.978878521 | 0.04867873  | 0.120455334 | no |
| SPINT2      | 0.109436525  | 1.978699684  | 0.048698974 | 0.120491554 | no |
| SLC44A4     | 0.109433798  | 1.978649786  | 0.048704623 | 0.120491661 | no |
| HTR3B       | -0.109389837 | -1.9778453   | 0.048795786 | 0.120703295 | no |
| HCG17       | -0.109384899 | -1.977754946 | 0.048806033 | 0.12071475  | no |
| TFG         | 0.109381177  | 1.977686841  | 0.048813759 | 0.120719964 | no |
| SSFA2       | 0.109365926  | 1.977407747  | 0.048845429 | 0.120784387 | no |
| FLJ40194    | 0.109357192  | 1.977247917  | 0.048863573 | 0.12079233  | no |
| ZNF83       | 0.109356577  | 1.977236659  | 0.048864851 | 0.12079233  | no |
| GALNT8      | -0.109356263 | -1.977230922 | 0.048865502 | 0.12079233  | no |
| GNAS-AS1    | 0.109344431  | 1.977014391  | 0.048890093 | 0.120839218 | no |
| LINGO4      | -0.109332511 | -1.976796263 | 0.048914876 | 0.120873042 | no |
| ZNF660      | -0.10933242  | -1.976794598 | 0.048915066 | 0.120873042 | no |
| SF3A3       | 0.109329734  | 1.976745446  | 0.048920651 | 0.120873042 | no |
| BEND6       | -0.10932082  | -1.976582329 | 0.048939193 | 0.120904954 | no |
| MED18       | 0.109305575  | 1.976303369  | 0.048970916 | 0.12096942  | no |
| ADAR        | -0.109299894 | -1.976199405 | 0.048982743 | 0.12098473  | no |
| PIGA        | 0.109282174  | 1.975875148  | 0.049019647 | 0.121053397 | no |
| TAT         | -0.109281136 | -1.97585615  | 0.04902181  | 0.121053397 | no |
| P4HA1       | 0.109269454  | 1.975642384  | 0.049046152 | 0.121099593 | no |
| AKR1C6P     | 0.109254881  | 1.97537571   | 0.049076533 | 0.121160687 | no |
| VSTM2A      | -0.109237345 | -1.975054817 | 0.049113113 | 0.121237068 | no |
| PCP2        | 0.109232297  | 1.974962448  | 0.049123647 | 0.121249143 | no |
| SYNCRIP     | -0.109224835 | -1.974825899 | 0.049139222 | 0.121273659 | no |
| LRCOL1      | 0.109195313  | 1.97428569   | 0.049200882 | 0.121406087 | no |
| SLC38A10    | 0.109193236  | 1.97424769   | 0.049205221 | 0.121406087 | no |
| PPP6R1      | 0.109191032  | 1.974207353  | 0.049209828 | 0.121406087 | no |
| PPIL3       | -0.109184563 | -1.97408898  | 0.04922335  | 0.121425507 | no |
| CRHBP       | -0.109180862 | -1.97402126  | 0.049231088 | 0.121430656 | no |
| ZNF808      | 0.109177544  | 1.97396055   | 0.049238025 | 0.121433829 | no |
| MRPL18      | -0.109157969 | -1.973602361 | 0.04927897  | 0.121520867 | no |
| GJB6        | -0.109143803 | -1.97334315  | 0.049308619 | 0.12158003  | no |
| APCDD1L-AS1 | 0.109136064  | 1.973201535  | 0.049324824 | 0.121606033 | no |
| CDK12       | 0.109129016  | 1.973072575  | 0.049339584 | 0.121628471 | no |
| KRTAP4-7    | -0.109125197 | -1.973002698 | 0.049347584 | 0.121634239 | no |
| IAH1        | 0.109102725  | 1.972591499  | 0.04939468  | 0.121736361 | no |

|              |              |              |             |             |    |
|--------------|--------------|--------------|-------------|-------------|----|
| C11orf42     | -0.109096979 | -1.97248637  | 0.049406727 | 0.121752089 | no |
| LOC100505666 | 0.109092533  | 1.972405012  | 0.049416052 | 0.121761106 | no |
| PPARD        | 0.109084448  | 1.972257069  | 0.049433011 | 0.121781459 | no |
| LGALS4       | -0.109082489 | -1.972221231 | 0.049437121 | 0.121781459 | no |
| GAS2L1       | -0.109080437 | -1.97218368  | 0.049441426 | 0.121781459 | no |
| C17orf78     | -0.109077791 | -1.972135268 | 0.049446978 | 0.121781459 | no |
| SMARCA1      | 0.109074494  | 1.972074928  | 0.049453898 | 0.121784546 | no |
| DSP          | 0.109056203  | 1.971740257  | 0.049492296 | 0.12186514  | no |
| SLC6A15      | -0.109044524 | -1.971526552 | 0.049516828 | 0.121911577 | no |
| SFXN3        | 0.108983167  | 1.970403877  | 0.049645873 | 0.122201624 | no |
| C15orf27     | -0.108983102 | -1.970402699 | 0.049646009 | 0.122201624 | no |
| MRPL27       | -0.108949225 | -1.969782839 | 0.04971738  | 0.122363286 | no |
| BTN2A1       | 0.108887707  | 1.968657246  | 0.049847202 | 0.122668753 | no |
| TFCP2L1      | 0.108853458  | 1.968030616  | 0.049919599 | 0.122832849 | no |
| C9orf156     | -0.108835821 | -1.967707931 | 0.049956915 | 0.122910596 | no |
| C7orf10      | 0.108825765  | 1.967523941  | 0.049978202 | 0.122948895 | no |
| FLJ46906     | -0.108808873 | -1.967214877 | 0.050013978 | 0.123022822 | no |
| PIP5K1B      | -0.108802708 | -1.96710208  | 0.05002704  | 0.123040869 | no |
| DNAH17       | -0.108792781 | -1.966920457 | 0.050048078 | 0.123078526 | no |
| FAM163A      | -0.108785935 | -1.966795203 | 0.050062591 | 0.123100131 | no |
| RPL6         | -0.108783217 | -1.966745469 | 0.050068355 | 0.123100219 | no |
| ITGA6        | 0.108765077  | 1.966413581  | 0.050106831 | 0.123174469 | no |
| CABLES1      | -0.108763575 | -1.966386106 | 0.050110017 | 0.123174469 | no |
| NPHS1        | -0.108756748 | -1.966261204 | 0.050124505 | 0.123182357 | no |
| MYCBP2-AS1   | -0.108756661 | -1.966259608 | 0.05012469  | 0.123182357 | no |
| FGF1         | 0.108743991  | 1.966027794  | 0.050151588 | 0.123234367 | no |
| GPT2         | -0.108706834 | -1.965347979 | 0.050230537 | 0.123414254 | no |
| MYH3         | -0.108682725 | -1.964906908 | 0.050281817 | 0.123521289 | no |
| DSG2         | 0.108679721  | 1.964851945  | 0.05028821  | 0.123521289 | no |
| AEBP2        | 0.108676513  | 1.964793249  | 0.050295038 | 0.123521289 | no |
| NKX6-3       | -0.108673909 | -1.964745609 | 0.05030058  | 0.123521289 | no |
| LOC339862    | -0.108672848 | -1.964726194 | 0.050302839 | 0.123521289 | no |
| SAMSN1-AS1   | 0.108651712  | 1.964339509  | 0.050347848 | 0.123617684 | no |
| ANKK1        | 0.108614775  | 1.963663741  | 0.050426585 | 0.123796864 | no |
| HSD3BP4      | -0.108606389 | -1.963510314 | 0.050444476 | 0.123826641 | no |
| COL11A2      | -0.108598647 | -1.963368688 | 0.050460996 | 0.123853046 | no |
| C2CD2L       | -0.108580056 | -1.963028569 | 0.050500688 | 0.123936311 | no |
| LOC100130987 | -0.108571801 | -1.962877547 | 0.05051832  | 0.123965427 | no |
| USP31        | -0.108568556 | -1.96281817  | 0.050525254 | 0.123968288 | no |
| AMIGO1       | -0.108547232 | -1.962428064 | 0.050570829 | 0.124065947 | no |
| PLCH2        | -0.108532484 | -1.96215825  | 0.050602372 | 0.12412916  | no |
| MPC1         | -0.108491298 | -1.96140478  | 0.050690543 | 0.124331256 | no |
| YARS2        | 0.108458053  | 1.960796585  | 0.050761809 | 0.124491844 | no |
| LTV1         | 0.108425148  | 1.960194619  | 0.050832427 | 0.124650809 | no |
| SLIT3        | 0.108411839  | 1.959951158  | 0.050861012 | 0.124699678 | no |
| PARP1        | -0.108410467 | -1.95992605  | 0.050863961 | 0.124699678 | no |
| XBP1         | 0.108407427  | 1.959870437  | 0.050870492 | 0.124701466 | no |
| FAM182A      | -0.108397324 | -1.959685629 | 0.050892203 | 0.124740458 | no |
| UPK3A        | 0.108374925  | 1.95927587   | 0.050940368 | 0.124844275 | no |
| CST2         | 0.108367355  | 1.959137386  | 0.050956655 | 0.124869951 | no |
| RPL28        | 0.108350407  | 1.95882734   | 0.050993134 | 0.124945098 | no |

|              |              |              |             |             |    |
|--------------|--------------|--------------|-------------|-------------|----|
| POLR1B       | 0.108338202  | 1.958604068  | 0.051019418 | 0.124995248 | no |
| KIR2DS2      | 0.108291112  | 1.957742652  | 0.05112093  | 0.125229672 | no |
| NEFH         | -0.108268561 | -1.957330121 | 0.051169605 | 0.125334622 | no |
| KHDC3L       | -0.108253379 | -1.957052406 | 0.051202394 | 0.125400644 | no |
| POLR2I       | -0.108247708 | -1.956948653 | 0.051214648 | 0.125416364 | no |
| LINC00309    | 0.108227614  | 1.956581081  | 0.051258083 | 0.125508427 | no |
| CCDC110      | 0.108216351  | 1.95637505   | 0.051282442 | 0.125553767 | no |
| LOC646938    | 0.108199209  | 1.956061479  | 0.051319535 | 0.125630269 | no |
| TRAPPC11     | 0.108190824  | 1.955908106  | 0.051337686 | 0.125660389 | no |
| PIGC         | 0.10816203   | 1.95538139   | 0.051400062 | 0.125798738 | no |
| C16orf88     | -0.10814933  | -1.955149079 | 0.051427593 | 0.125851787 | no |
| FLJ30403     | -0.108145604 | -1.955080922 | 0.051435672 | 0.125857228 | no |
| TSTA3        | 0.108138973  | 1.954959624  | 0.051450054 | 0.125878087 | no |
| ABCA17P      | -0.108130191 | -1.954798996 | 0.051469105 | 0.125910362 | no |
| TTC21B       | -0.108123829 | -1.95468261  | 0.051482912 | 0.125929804 | no |
| SLC51A       | 0.108106312  | 1.954362198  | 0.051520938 | 0.126008477 | no |
| C15orf61     | -0.108102382 | -1.954290314 | 0.051529473 | 0.126015009 | no |
| KIAA0317     | -0.108077228 | -1.953830199 | 0.051584129 | 0.126134317 | no |
| ZMAT5        | -0.108069538 | -1.953689542 | 0.051600847 | 0.126160842 | no |
| KRTCAP2      | 0.108054107  | 1.953407277  | 0.05163441  | 0.12622854  | no |
| SPAG5-AS1    | -0.10803847  | -1.953121257 | 0.051668437 | 0.12629736  | no |
| LOC647012    | -0.108034135 | -1.953041955 | 0.051677875 | 0.126306064 | no |
| LOC100128398 | -0.108008512 | -1.952573275 | 0.051733684 | 0.126415198 | no |
| ATF6         | 0.108008233  | 1.95256817   | 0.051734292 | 0.126415198 | no |
| PLEKHA6      | -0.107999544 | -1.952409239 | 0.051753229 | 0.126447094 | no |
| ZCCHC2       | 0.107984236  | 1.952129238  | 0.051786605 | 0.126503029 | no |
| MYO5C        | 0.107983645  | 1.952118417  | 0.051787895 | 0.126503029 | no |
| INPPL1       | 0.107960267  | 1.951690813  | 0.051838901 | 0.126613232 | no |
| LOC653653    | 0.107953802  | 1.951572567  | 0.051853014 | 0.126633308 | no |
| DRD1         | -0.10792802  | -1.951100986 | 0.051909328 | 0.126756432 | no |
| MGC32805     | -0.107923885 | -1.95102536  | 0.051918363 | 0.126764093 | no |
| PXDC1        | 0.107902996  | 1.950643276  | 0.051964034 | 0.126861191 | no |
| WDR78        | 0.107898031  | 1.950552461  | 0.051974894 | 0.126873291 | no |
| FRMPD2P1     | -0.107853581 | -1.94973945  | 0.052072204 | 0.127092492 | no |
| RHPN1-AS1    | 0.107851611  | 1.949703424  | 0.05207652  | 0.127092492 | no |
| AKAP13       | 0.10783377   | 1.949377109  | 0.052115622 | 0.12717348  | no |
| LOC100130238 | -0.107828075 | -1.949272945 | 0.05212811  | 0.12718951  | no |
| RFPL4A       | 0.107818803  | 1.949103348  | 0.052148446 | 0.127214664 | no |
| PFKL         | 0.107815004  | 1.949033873  | 0.052156779 | 0.127214664 | no |
| ERBB2        | -0.107812763 | -1.948992872 | 0.052161697 | 0.127214664 | no |
| UBB          | -0.107811114 | -1.948962721 | 0.052165314 | 0.127214664 | no |
| CCL17        | 0.107809684  | 1.94893657   | 0.052168452 | 0.127214664 | no |
| GMNN         | -0.107807185 | -1.948890863 | 0.052173935 | 0.127214664 | no |
| RNF145       | 0.107803478  | 1.948823061  | 0.052182071 | 0.127218579 | no |
| HORMAD1      | 0.107801059  | 1.948778818  | 0.05218738  | 0.127218579 | no |
| ATP6V1G2-DDX | -0.107793705 | -1.948644303 | 0.052203525 | 0.127236409 | no |
| TRIM3        | -0.107792334 | -1.948619224 | 0.052206536 | 0.127236409 | no |
| MYO18B       | -0.107769301 | -1.948197952 | 0.052257127 | 0.127345269 | no |
| PLAC8L1      | -0.107736812 | -1.947603734 | 0.052328559 | 0.127504882 | no |
| DCLRE1B      | 0.10772639   | 1.947413115  | 0.052351491 | 0.127546298 | no |
| SNORA51      | -0.107715965 | -1.947222454 | 0.052374436 | 0.127587736 | no |

|              |              |              |             |             |    |
|--------------|--------------|--------------|-------------|-------------|----|
| ADAM19       | 0.107687117  | 1.946694837  | 0.052437977 | 0.127728048 | no |
| PLEKHG2      | 0.107668079  | 1.946346652  | 0.052479944 | 0.127807336 | no |
| SDCBP2-AS1   | 0.107666956  | 1.9463261    | 0.052482422 | 0.127807336 | no |
| GEMIN2       | -0.107660964 | -1.946216517 | 0.052495637 | 0.127825032 | no |
| LOC92249     | -0.107627853 | -1.945610947 | 0.052568713 | 0.127988468 | no |
| MSS51        | -0.107618954 | -1.945448182 | 0.052588369 | 0.128021821 | no |
| ROBO4        | 0.107603415  | 1.945164006  | 0.052622701 | 0.128090891 | no |
| EEF2K        | 0.107562701  | 1.944419395  | 0.052712751 | 0.128295552 | no |
| RANBP6       | -0.107548799 | -1.94416514  | 0.052743528 | 0.128355924 | no |
| EXOSC8       | -0.107522148 | -1.943677737 | 0.052802571 | 0.12848506  | no |
| C12orf44     | 0.107516049  | 1.943566188  | 0.052816092 | 0.12850341  | no |
| ZNF331       | -0.107509059 | -1.943438354 | 0.05283159  | 0.128526567 | no |
| UBR5         | -0.107453898 | -1.942429558 | 0.052954025 | 0.128797127 | no |
| CACTIN-AS1   | 0.107453553  | 1.942423255  | 0.052954791 | 0.128797127 | no |
| ERCC3        | -0.10744551  | -1.942276157 | 0.052972664 | 0.128826019 | no |
| KDM1A        | -0.107409337 | -1.941614638 | 0.053053105 | 0.128982317 | no |
| LOC100294362 | -0.107408836 | -1.941605464 | 0.053054221 | 0.128982317 | no |
| TTC13        | -0.107408513 | -1.941599565 | 0.053054939 | 0.128982317 | no |
| NDFIP2       | -0.107386786 | -1.941202222 | 0.053103306 | 0.129085301 | no |
| IP011        | -0.107370908 | -1.940911858 | 0.053138675 | 0.129156668 | no |
| ST18         | -0.107351776 | -1.940561978 | 0.053181319 | 0.1292457   | no |
| LINC00592    | -0.107333325 | -1.940224563 | 0.053222471 | 0.129331086 | no |
| ZNF879       | -0.107319043 | -1.93996339  | 0.053254343 | 0.129393904 | no |
| CINP         | -0.107303157 | -1.939672882 | 0.053289813 | 0.129465451 | no |
| LOC148413    | 0.107282676  | 1.939298344  | 0.053335573 | 0.129561976 | no |
| CETN2        | 0.107274337  | 1.939145846  | 0.053354214 | 0.129592611 | no |
| LOC286437    | -0.107269122 | -1.939050472 | 0.053365875 | 0.129606287 | no |
| NUDCD2       | -0.107260294 | -1.938889048 | 0.053385617 | 0.129639582 | no |
| PRSS21       | 0.107255079  | 1.938793668  | 0.053397285 | 0.129653265 | no |
| LINC00341    | 0.107247658  | 1.938657966  | 0.053413889 | 0.129678929 | no |
| ZNF93        | -0.107219447 | -1.938142075 | 0.05347705  | 0.129817608 | no |
| FAM129C      | 0.107214084  | 1.938044009  | 0.053489064 | 0.129830761 | no |
| ZNF771       | -0.107211635 | -1.937999224 | 0.053494551 | 0.129830761 | no |
| FAM212A      | 0.107199171  | 1.937771309  | 0.053522482 | 0.129883883 | no |
| AFF4         | -0.107195028 | -1.937695544 | 0.05353177  | 0.129891755 | no |
| HOOK1        | -0.107190926 | -1.937620538 | 0.053540966 | 0.129898793 | no |
| NR2F2        | 0.107188343  | 1.937573293  | 0.05354676  | 0.129898793 | no |
| HHLA3        | 0.107181599  | 1.937449978  | 0.053561883 | 0.129920816 | no |
| GNA12        | 0.107178544  | 1.937394111  | 0.053568736 | 0.129922774 | no |
| PRKRA        | -0.107168152 | -1.937204069 | 0.053592052 | 0.129964657 | no |
| ZNF670-ZNF69 | -0.107141375 | -1.936714429 | 0.053652166 | 0.130095757 | no |
| OTUD6A       | -0.107131546 | -1.936534682 | 0.053674248 | 0.130126398 | no |
| MMP3         | 0.10713036   | 1.936513     | 0.053676912 | 0.130126398 | no |
| MTIF2        | 0.107126077  | 1.936434676  | 0.053686537 | 0.130135051 | no |
| SYNPR        | -0.107114846 | -1.936229305 | 0.053711781 | 0.130181559 | no |
| TSLP         | 0.107090916  | 1.935791724  | 0.053765601 | 0.130297308 | no |
| NACA         | -0.107054259 | -1.935121433 | 0.053848131 | 0.130482601 | no |
| PITPNA-AS1   | -0.107050192 | -1.935047063 | 0.053857295 | 0.130490092 | no |
| LIMD1-AS1    | -0.107041265 | -1.934883828 | 0.053877412 | 0.130524119 | no |
| PCF11        | -0.107032371 | -1.934721201 | 0.053897461 | 0.130546975 | no |
| USP46        | -0.107031691 | -1.934708754 | 0.053898995 | 0.130546975 | no |

|              |              |              |             |             |    |
|--------------|--------------|--------------|-------------|-------------|----|
| SLC4A5       | -0.107012851 | -1.934364267 | 0.053941486 | 0.130635166 | no |
| LOC440700    | -0.107004977 | -1.934220291 | 0.053959252 | 0.130663469 | no |
| HCN2         | -0.106995648 | -1.934049698 | 0.05398031  | 0.130699735 | no |
| SACM1L       | 0.106978946  | 1.933744308  | 0.054018024 | 0.130776316 | no |
| C7orf55-LUC7 | -0.106937564 | -1.932987621 | 0.054111566 | 0.130988023 | no |
| RPL7A        | -0.106928488 | -1.932821668 | 0.0541321   | 0.13102297  | no |
| TUBA4A       | -0.106922457 | -1.932711401 | 0.054145746 | 0.131041243 | no |
| ZNF813       | 0.106918829  | 1.932645057  | 0.054153959 | 0.131046361 | no |
| GSTT2        | -0.106889102 | -1.932101516 | 0.054221279 | 0.131191118 | no |
| MPP7         | -0.106887025 | -1.932063525 | 0.054225988 | 0.131191118 | no |
| CHMP4B       | 0.106872991  | 1.931806931  | 0.054257795 | 0.131241173 | no |
| LINC00222    | -0.106872508 | -1.931798092 | 0.054258891 | 0.131241173 | no |
| COL16A1      | 0.106867879  | 1.931713456  | 0.054269386 | 0.131251786 | no |
| NRXN3        | -0.106819927 | -1.930836689 | 0.054378207 | 0.131500175 | no |
| MYO5A        | -0.106792824 | -1.930341119 | 0.054439797 | 0.131634302 | no |
| CCDC62       | -0.106759427 | -1.929730502 | 0.054515765 | 0.131803161 | no |
| WDR41        | 0.106687924  | 1.928423151  | 0.054678713 | 0.132182252 | no |
| JPH2         | 0.106665511  | 1.928013378  | 0.054729871 | 0.132291043 | no |
| ILDR1        | 0.106659973  | 1.927912119  | 0.054742519 | 0.132296655 | no |
| BNIP3        | -0.106659104 | -1.927896224 | 0.054744505 | 0.132296655 | no |
| FBX044       | -0.106648768 | -1.927707249 | 0.054768116 | 0.132338833 | no |
| ZNF277       | -0.106628891 | -1.927343835 | 0.054813547 | 0.132433719 | no |
| BBS1         | -0.106615248 | -1.927094394 | 0.054844747 | 0.132494207 | no |
| KCNMB3       | 0.106589214  | 1.926618432  | 0.054904324 | 0.132608973 | no |
| C10orf32     | -0.106589096 | -1.926616271 | 0.054904595 | 0.132608973 | no |
| PRR22        | -0.106576342 | -1.926383085 | 0.054933802 | 0.132664608 | no |
| ANKRD54      | -0.106557976 | -1.9260473   | 0.054975884 | 0.132744551 | no |
| ILDR2        | -0.106556504 | -1.926020385 | 0.054979259 | 0.132744551 | no |
| DNAI1        | 0.106548502  | 1.925874103  | 0.0549976   | 0.13277392  | no |
| ALOX5AP      | 0.106532084  | 1.925573928  | 0.055035255 | 0.132836969 | no |
| BCAT2        | 0.106531725  | 1.92556736   | 0.055036079 | 0.132836969 | no |
| APLN         | 0.106527666  | 1.925493161  | 0.05504539  | 0.132844523 | no |
| CYP2D6       | -0.106522777 | -1.925403781 | 0.055056608 | 0.132856677 | no |
| PBLD         | -0.106519204 | -1.925338456 | 0.055064808 | 0.132861546 | no |
| NAB1         | -0.106510479 | -1.925178935 | 0.055084836 | 0.13289495  | no |
| SLC9A7P1     | 0.106500175  | 1.924990557  | 0.055108496 | 0.132937106 | no |
| LOC400548    | 0.106488724  | 1.924781207  | 0.055134799 | 0.13298563  | no |
| ACADVL       | 0.106408398  | 1.923312678  | 0.055319604 | 0.133416407 | no |
| DIABLO       | -0.106396583 | -1.923096689 | 0.055346828 | 0.133467088 | no |
| MAK          | 0.10638766   | 1.922933545  | 0.0553674   | 0.133501715 | no |
| ANKUB1       | 0.106349913  | 1.922243484  | 0.055454481 | 0.133696686 | no |
| ATXN2        | -0.106344333 | -1.922141469 | 0.055467365 | 0.133712747 | no |
| C2orf82      | -0.106324469 | -1.92177832  | 0.055513247 | 0.133808343 | no |
| KIAA1257     | 0.106292143  | 1.921187373  | 0.055587978 | 0.133973449 | no |
| UQCRH        | -0.106280179 | -1.920968648 | 0.05561566  | 0.134025134 | no |
| TCHP         | -0.106261837 | -1.920633345 | 0.055658118 | 0.134112412 | no |
| COX16        | -0.106216171 | -1.919798529 | 0.055763944 | 0.134352141 | no |
| KLHL26       | 0.106213512  | 1.919749923  | 0.055770111 | 0.134352141 | no |
| LOC154449    | -0.106207734 | -1.919644303 | 0.055783513 | 0.134354659 | no |
| MROH6        | 0.106207447  | 1.919639049  | 0.05578418  | 0.134354659 | no |
| MEMO1        | 0.106204977  | 1.919593888  | 0.055789911 | 0.134354659 | no |



|              |              |              |             |             |    |
|--------------|--------------|--------------|-------------|-------------|----|
| C2orf50      | 0.10617858   | 1.919111343  | 0.055851182 | 0.134478273 | no |
| FLJ44635     | 0.10617482   | 1.919042606  | 0.055859914 | 0.134478273 | no |
| KCNG3        | -0.106172327 | -1.918997041 | 0.055865704 | 0.134478273 | no |
| RBM33        | -0.106172083 | -1.918992579 | 0.055866271 | 0.134478273 | no |
| PSMD10       | -0.106154296 | -1.918667419 | 0.055907599 | 0.134562684 | no |
| SUCO         | 0.106133142  | 1.918280717  | 0.055956782 | 0.134665981 | no |
| ZNF488       | -0.106124008 | -1.918113749 | 0.05597803  | 0.134702031 | no |
| METTL18      | 0.106090062  | 1.917493214  | 0.056057055 | 0.134869895 | no |
| CDC73        | 0.106086584  | 1.917429632  | 0.056065157 | 0.134869895 | no |
| LINC00487    | 0.106085957  | 1.917418183  | 0.056066616 | 0.134869895 | no |
| PTPRB        | 0.106034851  | 1.916483972  | 0.05618578  | 0.135132753 | no |
| TBCE         | -0.106033701 | -1.916462951 | 0.056188464 | 0.135132753 | no |
| C17orf80     | -0.106024686 | -1.916298159 | 0.056209507 | 0.135168235 | no |
| ICK          | -0.106020076 | -1.9162139   | 0.056220269 | 0.135178989 | no |
| MRPS18A      | 0.106001983  | 1.915883166  | 0.056262529 | 0.135256483 | no |
| LOC100188947 | -0.106000889 | -1.915863161 | 0.056265086 | 0.135256483 | no |
| CLCC1        | 0.105972117  | 1.915337231  | 0.056332344 | 0.135390379 | no |
| BCYRN1       | -0.105971672 | -1.915329096 | 0.056333384 | 0.135390379 | no |
| AFAP1-AS1    | -0.105959977 | -1.915115321 | 0.056360743 | 0.135440984 | no |
| PRRG3        | -0.105949185 | -1.914918054 | 0.056385998 | 0.135486525 | no |
| LOC254896    | 0.105938833  | 1.914728827  | 0.056410233 | 0.135529604 | no |
| LOC100288911 | -0.105887844 | -1.91379681  | 0.056529726 | 0.135801513 | no |
| ABTB2        | -0.105847388 | -1.913057331 | 0.056624684 | 0.136014429 | no |
| UTP11L       | 0.105833937  | 1.912811459  | 0.056656287 | 0.136063898 | no |
| LOC100505835 | -0.105833233 | -1.912798591 | 0.056657941 | 0.136063898 | no |
| ADRB2        | 0.105820622  | 1.912568086  | 0.056687583 | 0.136119871 | no |
| VPS11        | -0.10580605  | -1.912301738 | 0.05672185  | 0.136186937 | no |
| ZMYM1        | 0.105801702  | 1.912222265  | 0.056732078 | 0.136196278 | no |
| INADL        | 0.105784764  | 1.911912665  | 0.056771937 | 0.136276745 | no |
| LRIF1        | 0.105774513  | 1.911725296  | 0.056796071 | 0.136305821 | no |
| ATP6VOE2-AS1 | -0.105771798 | -1.911675661 | 0.056802466 | 0.136305821 | no |
| TXNRD3NB     | -0.105771538 | -1.911670915 | 0.056803077 | 0.136305821 | no |
| DIRC3        | 0.105762362  | 1.91150319   | 0.056824691 | 0.136342462 | no |
| NEDD8        | -0.10574479  | -1.911182019 | 0.056866097 | 0.136426577 | no |
| TMEM168      | 0.105732207  | 1.91095202   | 0.056895764 | 0.136482516 | no |
| PDSS2        | 0.10572157   | 1.910757612  | 0.05692085  | 0.13651858  | no |
| UBR4         | -0.105717947 | -1.910691391 | 0.056929398 | 0.13651858  | no |
| LOC645355    | -0.105717754 | -1.91068785  | 0.056929855 | 0.13651858  | no |
| MIPEPP3      | 0.105712681  | 1.91059513   | 0.056941824 | 0.136532048 | no |
| NUMA1        | 0.105702133  | 1.910402332  | 0.05696672  | 0.136576504 | no |
| XKR5         | -0.105699388 | -1.910352169 | 0.056973199 | 0.136576801 | no |
| TMEM114      | 0.105660339  | 1.909638452  | 0.057065448 | 0.136772352 | no |
| SYTL2        | 0.10565947   | 1.909622569  | 0.057067502 | 0.136772352 | no |
| EFHC2        | 0.105652884  | 1.909502186  | 0.057083074 | 0.136794419 | no |
| BMPR1A       | -0.105624541 | -1.90898416  | 0.057150125 | 0.136939831 | no |
| CXCL2        | 0.105611955  | 1.908754117  | 0.057179922 | 0.136995954 | no |
| UBE2L6       | 0.105606986  | 1.908663292  | 0.05719169  | 0.137008874 | no |
| LOC100288198 | -0.105576586 | -1.908107687 | 0.057263722 | 0.137166144 | no |
| COL4A3BP     | 0.105559588  | 1.90779701   | 0.057304033 | 0.137247405 | no |
| INSM2        | -0.10554595  | -1.907547748 | 0.057336392 | 0.137309606 | no |
| C3orf36      | 0.105487027  | 1.906470845  | 0.057476372 | 0.137629495 | no |

|              |              |              |             |             |    |
|--------------|--------------|--------------|-------------|-------------|----|
| SELL         | -0.105450072 | -1.905795435 | 0.05756431  | 0.137815534 | no |
| PMF1         | -0.105448988 | -1.905775626 | 0.057566891 | 0.137815534 | no |
| ATP5I        | -0.105399949 | -1.904879397 | 0.057683757 | 0.138065575 | no |
| RALB         | 0.105399771  | 1.904876127  | 0.057684184 | 0.138065575 | no |
| LOC100288748 | -0.105383545 | -1.904579598 | 0.057722894 | 0.138142842 | no |
| ASTE1        | 0.105377604  | 1.90447102   | 0.057737074 | 0.138161392 | no |
| MIR5047      | 0.10535508   | 1.904059382  | 0.057790859 | 0.138274699 | no |
| RPL19        | -0.105344434 | -1.903864805 | 0.057816297 | 0.138320164 | no |
| CEP89        | 0.105337708  | 1.903741895  | 0.05783237  | 0.138343218 | no |
| LOC100996455 | 0.105325603  | 1.903520662  | 0.057861311 | 0.138397044 | no |
| BCAS3        | -0.105317677 | -1.903375808 | 0.057880267 | 0.138426977 | no |
| TARS         | -0.105301884 | -1.903087194 | 0.057918051 | 0.138501928 | no |
| ZNF280C      | -0.105291628 | -1.902899764 | 0.057942599 | 0.138545216 | no |
| LOC284260    | 0.105272666  | 1.902553223  | 0.05798801  | 0.138638372 | no |
| JTB          | 0.105261871  | 1.902355948  | 0.058013874 | 0.13868478  | no |
| USP4         | 0.105243285  | 1.902016289  | 0.058058429 | 0.138775806 | no |
| CCDC74B      | 0.105240601  | 1.901967226  | 0.058064867 | 0.138775806 | no |
| FBXL12       | 0.105234509  | 1.901855907  | 0.058079476 | 0.138795288 | no |
| LCN15        | -0.105224483 | -1.901672684 | 0.05810353  | 0.138837331 | no |
| B3GNT9       | 0.105212884  | 1.901460718  | 0.058131366 | 0.138888404 | no |
| NRIP3        | -0.105186655 | -1.900981385 | 0.058194357 | 0.139023446 | no |
| DDX47        | 0.105180472  | 1.900868385  | 0.058209215 | 0.139043485 | no |
| HAP1         | 0.105166759  | 1.900617786  | 0.058242176 | 0.139089196 | no |
| PP12613      | -0.105166436 | -1.900611885 | 0.058242953 | 0.139089196 | no |
| CCDC176      | 0.105164433  | 1.900575292  | 0.058247767 | 0.139089196 | no |
| MAN2C1       | -0.105160386 | -1.900501331 | 0.058257499 | 0.13909698  | no |
| TMC05B       | 0.105155759  | 1.900416764  | 0.058268628 | 0.139108097 | no |
| LIN54        | -0.105152739 | -1.900361589 | 0.05827589  | 0.139109981 | no |
| EYA4         | 0.105119863  | 1.899760793  | 0.058355015 | 0.139283389 | no |
| MOXD2P       | 0.105085484  | 1.899132548  | 0.058437851 | 0.139465615 | no |
| KCTD2        | -0.105077522 | -1.898987046 | 0.05845705  | 0.139495944 | no |
| GFAP         | 0.105060156  | 1.898669696  | 0.058498943 | 0.139580413 | no |
| LPAL2        | -0.105006462 | -1.897688503 | 0.058628625 | 0.139864612 | no |
| SLITRK2      | -0.105005451 | -1.897670034 | 0.058631068 | 0.139864612 | no |
| ZNF581       | 0.104984511  | 1.897287396  | 0.058681708 | 0.139966415 | no |
| LOC493754    | 0.104982419  | 1.897249162  | 0.05868677  | 0.139966415 | no |
| ROB02        | -0.104969158 | -1.897006837 | 0.058718861 | 0.140027412 | no |
| BRWD1-IT2    | -0.10495181  | -1.896689838 | 0.058760863 | 0.140112028 | no |
| RARA         | -0.104943585 | -1.896539529 | 0.058780788 | 0.140143988 | no |
| ZNF833P      | -0.104938047 | -1.896438338 | 0.058794205 | 0.140160427 | no |
| NEK7         | 0.104933727  | 1.896359394  | 0.058804673 | 0.140169836 | no |
| FBX032       | 0.104921223  | 1.896130908  | 0.058834982 | 0.140226528 | no |
| PLEKHA1      | -0.104917254 | -1.896058379 | 0.058844606 | 0.140233913 | no |
| SLC22A4      | 0.10488664   | 1.895498972  | 0.058918877 | 0.14039534  | no |
| CYP1B1-AS1   | 0.104875724  | 1.895299507  | 0.058945378 | 0.140442917 | no |
| IL1RL2       | 0.10485453   | 1.894912225  | 0.058996861 | 0.140549999 | no |
| TVP23C       | 0.104845192  | 1.894741598  | 0.059019555 | 0.140588479 | no |
| FLVCR2       | 0.104823021  | 1.894336481  | 0.059073467 | 0.140701304 | no |
| ZNF251       | -0.104806323 | -1.894031368 | 0.059114097 | 0.140782476 | no |
| KATNAL2      | 0.10479958   | 1.89390815   | 0.059130512 | 0.140805965 | no |
| DIO3         | 0.104787086  | 1.893679853  | 0.059160935 | 0.140862803 | no |

|              |              |              |             |             |    |
|--------------|--------------|--------------|-------------|-------------|----|
| PCDH1        | -0.104776077 | -1.893478703 | 0.059187752 | 0.140905138 | no |
| PACS1        | 0.104774404  | 1.893448134  | 0.059191828 | 0.140905138 | no |
| LOC644554    | -0.104767358 | -1.893319377 | 0.059209    | 0.140930404 | no |
| TRIM17       | -0.104744586 | -1.892903291 | 0.05926452  | 0.141046933 | no |
| SLC26A1      | -0.104737057 | -1.892765727 | 0.059282885 | 0.141075018 | no |
| CSAG1        | 0.104692576  | 1.891952975  | 0.059391487 | 0.141317809 | no |
| ATXN7L3      | -0.104687016 | -1.891851384 | 0.059405074 | 0.141333828 | no |
| FAM127A      | -0.104684439 | -1.891804294 | 0.059411372 | 0.141333828 | no |
| SERF2-C15ORF | 0.104678542  | 1.891696547  | 0.059425786 | 0.14135247  | no |
| LOC283914    | 0.10466454   | 1.891440703  | 0.059460023 | 0.141418256 | no |
| LOC100507156 | 0.104629368  | 1.890798066  | 0.059546094 | 0.141607293 | no |
| MKS1         | -0.10461681  | -1.890568601 | 0.059576852 | 0.141664764 | no |
| COR07-PAM16  | -0.104603497 | -1.890325359 | 0.059609472 | 0.141726647 | no |
| SF3A1        | -0.104584876 | -1.889985134 | 0.059655122 | 0.141819494 | no |
| LOC729444    | -0.104546661 | -1.889286902 | 0.059748899 | 0.142026722 | no |
| MRPL36       | 0.104542512  | 1.889211104  | 0.059759087 | 0.142035228 | no |
| KAT8         | -0.104536894 | -1.889108455 | 0.059772886 | 0.142048412 | no |
| XRCC6        | -0.104534872 | -1.889071506 | 0.059777853 | 0.142048412 | no |
| HERPUD1      | 0.104519558  | 1.888791716  | 0.059815481 | 0.142122111 | no |
| DNAJC27      | -0.104511463 | -1.888643804 | 0.05983538  | 0.142153677 | no |
| TAS1R1       | 0.104486497  | 1.888187657  | 0.059896784 | 0.142283828 | no |
| LCOR         | -0.104482211 | -1.888109354 | 0.05990733  | 0.142293152 | no |
| ZNF326       | -0.104451649 | -1.887550977 | 0.059982578 | 0.142456138 | no |
| ZNF607       | -0.10441405  | -1.886864024 | 0.060075262 | 0.142660491 | no |
| CXorf31      | -0.104383689 | -1.886309339 | 0.060150186 | 0.142822633 | no |
| GALK1        | 0.104378909  | 1.886221993  | 0.060161992 | 0.142834883 | no |
| INF2         | 0.10437178   | 1.886091753  | 0.060179598 | 0.1428506   | no |
| RAB25        | -0.104370846 | -1.886074688 | 0.060181905 | 0.1428506   | no |
| ACY3         | -0.104347838 | -1.885654346 | 0.060238761 | 0.142969763 | no |
| LOC647323    | 0.104316697  | 1.8850854    | 0.060315787 | 0.143136768 | no |
| SNX25        | -0.104299343 | -1.884768356 | 0.060358745 | 0.143216256 | no |
| LINC00115    | -0.104297783 | -1.884739843 | 0.06036261  | 0.143216256 | no |
| YIPF4        | 0.104244219  | 1.883761268  | 0.060495371 | 0.143515401 | no |
| NCOA5        | -0.104238153 | -1.883650443 | 0.060510422 | 0.143525605 | no |
| KIAA1429     | -0.104237102 | -1.883631245 | 0.060513029 | 0.143525605 | no |
| VAV3         | 0.104219541  | 1.883310424  | 0.060556618 | 0.14361314  | no |
| MSRB2        | -0.104213017 | -1.883191241 | 0.060572817 | 0.143635707 | no |
| NUP210       | 0.104201101  | 1.882973539  | 0.060602417 | 0.143690042 | no |
| PEBP1        | -0.104196347 | -1.882886702 | 0.060614227 | 0.14370219  | no |
| TP53BP2      | -0.104191922 | -1.882805857 | 0.060625224 | 0.143712408 | no |
| PTPRH        | 0.104172035  | 1.882442542  | 0.060674664 | 0.143813743 | no |
| CLU          | 0.104139748  | 1.88185271   | 0.060755    | 0.143988279 | no |
| PKM          | -0.10412254  | -1.881538336 | 0.060797855 | 0.144073955 | no |
| HEXDC        | -0.104116869 | -1.881434734 | 0.060811983 | 0.144091547 | no |
| SPTSSB       | 0.104111223  | 1.881331601  | 0.06082605  | 0.144108989 | no |
| NR1D2        | -0.104101999 | -1.881163087 | 0.060849041 | 0.144147568 | no |
| TLCD2        | 0.104095526  | 1.881044845  | 0.060865177 | 0.144169901 | no |
| TRIM7        | -0.10407089  | -1.880594784 | 0.060926628 | 0.144290182 | no |
| GSDMB        | -0.104069786 | -1.880574606 | 0.060929385 | 0.144290182 | no |
| PPP1R3G      | 0.104048275  | 1.880181646  | 0.060983083 | 0.144401437 | no |
| ZNF815P      | -0.104042868 | -1.880082878 | 0.060996587 | 0.144417499 | no |

|              |              |              |             |             |    |
|--------------|--------------|--------------|-------------|-------------|----|
| RGPD3        | -0.104021765 | -1.879697355 | 0.061049317 | 0.144526424 | no |
| LOC100294145 | 0.104006554  | 1.879419482  | 0.061087347 | 0.144600527 | no |
| SLC38A8      | -0.103972018 | -1.878788588 | 0.061173766 | 0.144789141 | no |
| DCTN4        | -0.103968467 | -1.878723724 | 0.061182657 | 0.144794238 | no |
| PKD1L1       | 0.103957629  | 1.878525739  | 0.0612098   | 0.144842526 | no |
| FAM69A       | -0.103952387 | -1.878429978 | 0.061222933 | 0.144857651 | no |
| NAB2         | 0.1039493    | 1.878373589  | 0.061230667 | 0.144860002 | no |
| LINC00359    | 0.103936068  | 1.878131884  | 0.061263828 | 0.144922501 | no |
| LINC00511    | 0.103928743  | 1.877998067  | 0.061282193 | 0.14494999  | no |
| RSU1P2       | 0.103923821  | 1.877908154  | 0.061294536 | 0.144963229 | no |
| C21orf7      | 0.103892425  | 1.877334632  | 0.061373313 | 0.145123846 | no |
| KRT18P55     | -0.103891372 | -1.877315411 | 0.061375954 | 0.145123846 | no |
| GPR97        | 0.103888004  | 1.877253885  | 0.061384411 | 0.145127874 | no |
| AMACR        | 0.103859693  | 1.876736714  | 0.061455531 | 0.145272394 | no |
| UQCRB        | -0.103858289 | -1.876711078 | 0.061459058 | 0.145272394 | no |
| MIR548H3     | 0.103847068  | 1.876506104  | 0.061487265 | 0.14530841  | no |
| LINC00260    | -0.10383918  | -1.876362008 | 0.061507102 | 0.14530841  | no |
| MAP2K4       | -0.103838838 | -1.87635577  | 0.061507961 | 0.14530841  | no |
| ITGB1BP2     | -0.10383881  | -1.876355252 | 0.061508032 | 0.14530841  | no |
| ZNF816       | 0.103837071  | 1.876323497  | 0.061512404 | 0.14530841  | no |
| FASTKD5      | 0.103836094  | 1.876305643  | 0.061514863 | 0.14530841  | no |
| LPL          | -0.103832282 | -1.876236016 | 0.06152445  | 0.145315085 | no |
| PPP2R5A      | -0.103826605 | -1.876132311 | 0.061538733 | 0.145332848 | no |
| PNPLA6       | -0.103796165 | -1.875576265 | 0.061615362 | 0.145497828 | no |
| B4GALT4      | 0.103782289  | 1.875322812  | 0.061650316 | 0.145564375 | no |
| RBX1         | -0.1037656   | -1.875017955 | 0.061692382 | 0.145647696 | no |
| HDC          | 0.103758606  | 1.874890195  | 0.061710018 | 0.14567333  | no |
| RANGRF       | 0.103754179  | 1.874809335  | 0.061721182 | 0.145683682 | no |
| KCTD14       | 0.103746616  | 1.874671193  | 0.061740259 | 0.145712706 | no |
| CMTM8        | 0.103735609  | 1.874470136  | 0.061768033 | 0.145735273 | no |
| PNLIPRP3     | 0.103735132  | 1.874461422  | 0.061769237 | 0.145735273 | no |
| MPC2         | 0.103734765  | 1.874454708  | 0.061770164 | 0.145735273 | no |
| CCDC30       | 0.10368174   | 1.873486151  | 0.061904109 | 0.146035259 | no |
| ZNF592       | -0.10367358  | -1.873337099 | 0.061924744 | 0.146067903 | no |
| LMBRD1       | 0.103647826  | 1.872866677  | 0.061989905 | 0.146181127 | no |
| KCNS1        | -0.10364736  | -1.872858172 | 0.061991083 | 0.146181127 | no |
| CA10         | -0.103646525 | -1.872842912 | 0.061993198 | 0.146181127 | no |
| HIVEP2       | -0.103642481 | -1.872769047 | 0.062003435 | 0.146181127 | no |
| FABP6        | -0.103638256 | -1.872691881 | 0.062014132 | 0.146181127 | no |
| ATG16L2      | 0.10363702   | 1.872669304  | 0.062017261 | 0.146181127 | no |
| TM4SF20      | -0.103635797 | -1.872646965 | 0.062020358 | 0.146181127 | no |
| NUDC         | -0.103610018 | -1.872176101 | 0.062085665 | 0.146319006 | no |
| GLRA2        | -0.103607278 | -1.872126058 | 0.062092609 | 0.146319326 | no |
| ZNF133       | -0.103599497 | -1.871983928 | 0.062112334 | 0.146349762 | no |
| NME6         | 0.103567387  | 1.871397432  | 0.062193787 | 0.146503258 | no |
| ITPR2        | 0.103565679  | 1.871366226  | 0.062198124 | 0.146503258 | no |
| SNORD8       | -0.103563459 | -1.871325686 | 0.062203758 | 0.146503258 | no |
| LINC00462    | 0.103563069  | 1.871318562  | 0.062204748 | 0.146503258 | no |
| RRM2B        | 0.103558373  | 1.871232786  | 0.062216669 | 0.14651528  | no |
| CLMP         | 0.103531638  | 1.870744458  | 0.062284577 | 0.146659126 | no |
| ZEB2         | 0.103518774  | 1.870509498  | 0.062317273 | 0.146718188 | no |

|              |              |              |             |             |    |
|--------------|--------------|--------------|-------------|-------------|----|
| SUV420H2     | -0.103516398 | -1.870466097 | 0.062323314 | 0.146718188 | no |
| CDK7         | 0.103505025  | 1.870258379  | 0.062352233 | 0.146770191 | no |
| TRIM8        | -0.103492172 | -1.870023616 | 0.062384931 | 0.146831076 | no |
| EYS          | -0.103475217 | -1.86971394  | 0.062428085 | 0.146916554 | no |
| FREM3        | -0.1034476   | -1.869209524 | 0.062498429 | 0.147065995 | no |
| DPP4         | 0.103444741  | 1.869157299  | 0.062505716 | 0.147067039 | no |
| PSORS1C2     | 0.103433804  | 1.868957549  | 0.062533593 | 0.147116524 | no |
| LOC100335030 | -0.103422879 | -1.868757999 | 0.062561453 | 0.147151213 | no |
| CA12         | 0.103422652  | 1.86875385   | 0.062562032 | 0.147151213 | no |
| NOP9         | -0.103412522 | -1.868568838 | 0.062587871 | 0.147195879 | no |
| SUGP2        | -0.103394816 | -1.868245442 | 0.062633059 | 0.147282453 | no |
| TONSL        | -0.103392728 | -1.868207313 | 0.062638389 | 0.147282453 | no |
| ZSCAN26      | -0.103389817 | -1.868154154 | 0.06264582  | 0.147283811 | no |
| STARD4-AS1   | -0.103383369 | -1.868036375 | 0.062662287 | 0.14730641  | no |
| ANKRD26P3    | -0.103359501 | -1.867600455 | 0.062723264 | 0.147433629 | no |
| SLC38A7      | 0.103344915  | 1.867334057  | 0.062760553 | 0.147505144 | no |
| LINC00158    | -0.103338803 | -1.867222425 | 0.062776183 | 0.147525747 | no |
| SAMD13       | -0.103334658 | -1.867146713 | 0.062786787 | 0.147534532 | no |
| HIST2H2BE    | 0.10331119   | 1.866718104  | 0.06284684  | 0.147659499 | no |
| GPR75        | -0.103302559 | -1.866560464 | 0.062868939 | 0.147695274 | no |
| GAS1         | -0.10328551  | -1.866249096 | 0.062912608 | 0.147781709 | no |
| LHX2         | -0.103267721 | -1.865924194 | 0.062958202 | 0.147872647 | no |
| MED21        | -0.103262431 | -1.865827586 | 0.062971764 | 0.147888339 | no |
| DOLPP1       | -0.103255864 | -1.865707648 | 0.062988605 | 0.147897416 | no |
| ZNF416       | 0.103255557  | 1.86570204   | 0.062989393 | 0.147897416 | no |
| SNX30        | -0.103214817 | -1.864957995 | 0.063093952 | 0.148126735 | no |
| CCT6P3       | -0.10320585  | -1.864794219 | 0.063116987 | 0.148159182 | no |
| CCDC85A      | -0.103204069 | -1.8647617   | 0.063121561 | 0.148159182 | no |
| KHK          | 0.103193339  | 1.864565724  | 0.063149135 | 0.148207718 | no |
| LDLRAP1      | 0.103186774  | 1.864445835  | 0.063166009 | 0.148231131 | no |
| PIN4P1       | -0.103180238 | -1.864326473 | 0.063182812 | 0.148254374 | no |
| RSBN1        | -0.103173998 | -1.864212513 | 0.063198858 | 0.148275836 | no |
| FBX08        | 0.103166741  | 1.864079969  | 0.063217525 | 0.148297838 | no |
| NLGN4Y       | -0.103164987 | -1.864047939 | 0.063222037 | 0.148297838 | no |
| UROC1        | -0.103157793 | -1.863916554 | 0.063240546 | 0.148325066 | no |
| MFN1         | 0.103132794  | 1.86345999   | 0.063304901 | 0.148459803 | no |
| C2orf88      | -0.103109292 | -1.863030797 | 0.063365448 | 0.148585174 | no |
| ZNF605       | -0.103106677 | -1.862983039 | 0.063372188 | 0.148585174 | no |
| PHKA2        | 0.10310073   | 1.862874422  | 0.06338752  | 0.148601545 | no |
| SCAMP4       | 0.103098604  | 1.862835606  | 0.063393    | 0.148601545 | no |
| FAM66E       | -0.103088532 | -1.862651651 | 0.063418975 | 0.14864622  | no |
| NUMBL        | 0.10306675   | 1.862253863  | 0.063475174 | 0.148761718 | no |
| LOC401074    | -0.103044327 | -1.861844367 | 0.06353307  | 0.148881169 | no |
| INTS4        | -0.103013017 | -1.861272571 | 0.063613985 | 0.149054531 | no |
| CCBP2        | 0.102956549  | 1.860241358  | 0.06376013  | 0.149380678 | no |
| CRIM1        | 0.102942486  | 1.859984542  | 0.06379657  | 0.149449759 | no |
| CACTIN       | -0.102921094 | -1.859593884 | 0.063852034 | 0.149563385 | no |
| HTR1F        | 0.102875467  | 1.858760672  | 0.063970463 | 0.149822238 | no |
| DNP1         | -0.102873148 | -1.858718323 | 0.063976487 | 0.149822238 | no |
| SLC14A2      | -0.102865841 | -1.858584886 | 0.063995471 | 0.149850368 | no |
| SRGAP1       | -0.102844848 | -1.858201532 | 0.064050038 | 0.149961801 | no |

|              |              |              |             |             |    |
|--------------|--------------|--------------|-------------|-------------|----|
| GLYCTK       | 0.102839767  | 1.858108747  | 0.064063251 | 0.149976398 | no |
| SNRNP40      | 0.102827866  | 1.857891431  | 0.064094207 | 0.150032523 | no |
| TRIL         | -0.102799516 | -1.857373719 | 0.064168002 | 0.150173275 | no |
| EXTL2        | 0.102799397  | 1.857371547  | 0.064168311 | 0.150173275 | no |
| TNIP3        | 0.102755808  | 1.85657559   | 0.064281906 | 0.150414083 | no |
| DTYMK        | 0.102754543  | 1.856552486  | 0.064285206 | 0.150414083 | no |
| NCKAP5       | -0.102748867 | -1.856448838 | 0.064300011 | 0.150428499 | no |
| DKFZP434L187 | -0.102746814 | -1.856411349 | 0.064305366 | 0.150428499 | no |
| OTOGL        | -0.102740919 | -1.856303705 | 0.064320746 | 0.150448101 | no |
| FER1L5       | 0.102736029  | 1.856214417  | 0.064333505 | 0.15046157  | no |
| LIN28A       | -0.102716902 | -1.855865146 | 0.064383437 | 0.150556653 | no |
| ZNF259       | 0.102715089  | 1.85583204   | 0.064388172 | 0.150556653 | no |
| CWF19L1      | -0.102709858 | -1.855736522 | 0.064401833 | 0.150572215 | no |
| SEC14L5      | -0.102702926 | -1.855609942 | 0.064419941 | 0.150598168 | no |
| BAG4         | -0.102669412 | -1.854997962 | 0.064507549 | 0.15078657  | no |
| ROR1         | 0.102656932  | 1.854770078  | 0.064540196 | 0.150846477 | no |
| ZNF680       | -0.102643283 | -1.854520843 | 0.064575919 | 0.150913556 | no |
| LSM2         | -0.102634161 | -1.85435427  | 0.064599802 | 0.150952957 | no |
| ORAI2        | 0.102629173  | 1.854263197  | 0.064612863 | 0.150962831 | no |
| RPS6KA2      | -0.102627183 | -1.854226852 | 0.064618077 | 0.150962831 | no |
| NDUFB1       | -0.102597778 | -1.853689933 | 0.064695129 | 0.151126415 | no |
| TMEM30A      | -0.102587628 | -1.853504597 | 0.064721744 | 0.151172155 | no |
| CDKL5        | -0.10257713  | -1.853312891 | 0.064749283 | 0.151220045 | no |
| BRMS1        | 0.102567567  | 1.853138275  | 0.064774376 | 0.15126221  | no |
| GBE1         | 0.102556889  | 1.852943306  | 0.064802403 | 0.151310952 | no |
| NEGR1-IT1    | 0.102554251  | 1.852895131  | 0.06480933  | 0.151310952 | no |
| PTDSS1       | 0.102537741  | 1.852593681  | 0.064852687 | 0.151395731 | no |
| SLC7A5P2     | -0.102507323 | -1.85203826  | 0.064932636 | 0.151565905 | no |
| AACSP1       | -0.102456799 | -1.851115748 | 0.065065606 | 0.151859789 | no |
| LSM7         | -0.102453514 | -1.851055754 | 0.065074261 | 0.151863497 | no |
| PCA3         | -0.102447514 | -1.850946215 | 0.065090067 | 0.151877066 | no |
| RASGRP4      | 0.102445942  | 1.850917508  | 0.065094209 | 0.151877066 | no |
| LOC643714    | 0.102408344  | 1.850231015  | 0.065193342 | 0.152091849 | no |
| SNPH         | -0.102401316 | -1.850102679 | 0.065211888 | 0.152117544 | no |
| LOC100507254 | 0.102397565  | 1.8500342    | 0.065221786 | 0.152117544 | no |
| CDX1         | 0.102393531  | 1.84996054   | 0.065232434 | 0.152117544 | no |
| EFNA4        | 0.102393442  | 1.849958915  | 0.065232669 | 0.152117544 | no |
| TLR9         | 0.10237679   | 1.849654877  | 0.065276635 | 0.152203556 | no |
| KIF27        | -0.102363188 | -1.849406533 | 0.065312566 | 0.152254421 | no |
| ANGEL1       | -0.102363168 | -1.849406165 | 0.065312619 | 0.152254421 | no |
| PCDHGA10     | -0.102305939 | -1.848361258 | 0.065463978 | 0.15259071  | no |
| SCAND1       | -0.102272988 | -1.847759631 | 0.065551257 | 0.15277758  | no |
| C19orf45     | -0.102264418 | -1.847603174 | 0.06557397  | 0.152813945 | no |
| KRTDAP       | -0.102254472 | -1.847421576 | 0.065600342 | 0.152858826 | no |
| SNAPC3       | -0.102246664 | -1.847279018 | 0.06562105  | 0.152890501 | no |
| HELZ         | -0.102233357 | -1.847036066 | 0.065656354 | 0.152956174 | no |
| ZNF439       | -0.102195065 | -1.846336937 | 0.065758034 | 0.15317179  | no |
| PIGF         | 0.102192598  | 1.8462919    | 0.065764589 | 0.15317179  | no |
| PPP4C        | 0.102190453  | 1.846252737  | 0.065770289 | 0.15317179  | no |
| SLC39A4      | -0.102182201 | -1.846102085 | 0.06579222  | 0.153206262 | no |
| IL23A        | 0.102172018  | 1.845916165  | 0.065819293 | 0.153248731 | no |

|              |              |              |             |             |    |
|--------------|--------------|--------------|-------------|-------------|----|
| LRRC37A      | -0.102169977 | -1.845878912 | 0.065824719 | 0.153248731 | no |
| SMIM14       | 0.102155159  | 1.845608367  | 0.065864135 | 0.153323887 | no |
| CYTL1        | 0.102123379  | 1.845028148  | 0.065948733 | 0.153504193 | no |
| AHSG         | -0.10211418  | -1.844860206 | 0.065973236 | 0.153544598 | no |
| SDPR         | -0.102106346 | -1.844717192 | 0.065994108 | 0.153576543 | no |
| MRPL12       | -0.102086525 | -1.844355318 | 0.066046946 | 0.153682863 | no |
| C2orf196     | -0.102074697 | -1.84413938  | 0.066078492 | 0.153739621 | no |
| TMC03        | 0.102038629  | 1.843480894  | 0.066174767 | 0.15394695  | no |
| GOLGA8A      | -0.102021579 | -1.843169615 | 0.066220319 | 0.154036245 | no |
| PRSS27       | -0.102016198 | -1.84307137  | 0.066234701 | 0.154053026 | no |
| LINC00457    | 0.10201122   | 1.842980501  | 0.066248006 | 0.154067297 | no |
| GADD45A      | 0.101994927  | 1.842683048  | 0.066291573 | 0.154145023 | no |
| MIR497       | 0.101993357  | 1.842654385  | 0.066295773 | 0.154145023 | no |
| HSD17B6      | -0.10197559  | -1.842330018 | 0.066343312 | 0.15423887  | no |
| TMEM150C     | 0.101953047  | 1.84191848   | 0.066403667 | 0.154362489 | no |
| AP2M1        | 0.101933228  | 1.841556661  | 0.066456768 | 0.15446922  | no |
| FOCAD        | 0.101917786  | 1.841274757  | 0.066498166 | 0.154548727 | no |
| ARSI         | 0.101879626  | 1.840578109  | 0.066600559 | 0.154767405 | no |
| SMTNL1       | 0.101877354  | 1.840536626  | 0.06660666  | 0.154767405 | no |
| UNC5D        | -0.101855793 | -1.840143024 | 0.066664573 | 0.154885226 | no |
| ACAN         | 0.101850862  | 1.840053013  | 0.066677823 | 0.154899265 | no |
| PLG          | -0.101811697 | -1.839338024 | 0.066783149 | 0.155126265 | no |
| MLLT3        | -0.10180916  | -1.839291722 | 0.066789974 | 0.155126265 | no |
| DHODH        | -0.101802797 | -1.839175568 | 0.066807099 | 0.155149273 | no |
| MATK         | -0.101799302 | -1.839111766 | 0.066816507 | 0.155154356 | no |
| TIGD5        | -0.101784551 | -1.838842476 | 0.066856229 | 0.15522982  | no |
| TMEM136      | -0.101778264 | -1.838727702 | 0.066873164 | 0.15524732  | no |
| FMOD         | 0.101773831  | 1.838646777  | 0.066885107 | 0.15524732  | no |
| PYCR2        | 0.101773708  | 1.83864454   | 0.066885438 | 0.15524732  | no |
| ANKRD62P1-PA | -0.101758079 | -1.838359223 | 0.066927559 | 0.155328313 | no |
| VCX          | 0.101746626  | 1.83815015   | 0.066958439 | 0.1553832   | no |
| AK5          | -0.101730535 | -1.83785642  | 0.067001843 | 0.155464456 | no |
| NUPR1L       | -0.10172538  | -1.837762312 | 0.067015753 | 0.155464456 | no |
| ARL13B       | -0.101725191 | -1.837758853 | 0.067016265 | 0.155464456 | no |
| SIRT4        | -0.101722921 | -1.837717422 | 0.06702239  | 0.155464456 | no |
| SKIL         | 0.101716553  | 1.837601181  | 0.067039577 | 0.155487541 | no |
| LOC100288123 | -0.101668761 | -1.836728745 | 0.067168691 | 0.155770189 | no |
| SLC35D3      | -0.101643355 | -1.836264978 | 0.067237409 | 0.155912727 | no |
| ADPGK-AS1    | 0.101632504  | 1.836066899  | 0.067266776 | 0.155963997 | no |
| LPPR1        | -0.101612959 | -1.835710124 | 0.067319699 | 0.156069866 | no |
| JMJD7-PLA2G4 | -0.101595074 | -1.835383649 | 0.067368158 | 0.156165363 | no |
| GTF2F1       | -0.101569639 | -1.834919353 | 0.067437123 | 0.15630837  | no |
| NFX1         | -0.10154357  | -1.834443502 | 0.067507865 | 0.156455464 | no |
| SPATA5L1     | -0.101537249 | -1.834328104 | 0.067525029 | 0.15647837  | no |
| SPEF2        | 0.101526013  | 1.834123013  | 0.067555544 | 0.156525804 | no |
| NRN1         | -0.101524349 | -1.834092636 | 0.067560065 | 0.156525804 | no |
| MSH2         | -0.101497702 | -1.833606227 | 0.067632486 | 0.156676701 | no |
| LSM12        | 0.101480991  | 1.833301194  | 0.067677935 | 0.156765089 | no |
| RNF182       | -0.101475671 | -1.833204091 | 0.067692408 | 0.156776628 | no |
| TIGD7        | -0.101473797 | -1.833169891 | 0.067697506 | 0.156776628 | no |
| WNT9A        | 0.101423437  | 1.832250643  | 0.067834657 | 0.157071803 | no |

|              |              |              |             |             |    |
|--------------|--------------|--------------|-------------|-------------|----|
| COX5A        | -0.101421629 | -1.832217654 | 0.067839583 | 0.157071803 | no |
| CA7          | -0.101418614 | -1.832162614 | 0.067847802 | 0.157073912 | no |
| LOC100288181 | -0.10137648  | -1.831393548 | 0.06796274  | 0.157323056 | no |
| C5orf27      | -0.101373239 | -1.831334396 | 0.067971587 | 0.15732659  | no |
| CTAGE7P      | -0.101360385 | -1.831099768 | 0.068006689 | 0.157390884 | no |
| TSACC        | 0.101350265  | 1.830915042  | 0.068034335 | 0.157437913 | no |
| SMC2         | -0.101342459 | -1.830772561 | 0.068055665 | 0.157470317 | no |
| SLC9A9-AS1   | 0.101329155  | 1.830529726  | 0.068092032 | 0.157537502 | no |
| TTPAL        | -0.101320559 | -1.83037283  | 0.068115537 | 0.157574919 | no |
| FAM122C      | 0.101296916  | 1.829941291  | 0.068180221 | 0.15770758  | no |
| FAM136A      | 0.101272978  | 1.829504376  | 0.068245763 | 0.157842197 | no |
| RASGRP2      | -0.101225381 | -1.828635615 | 0.068376241 | 0.158126955 | no |
| CLCN2        | -0.101190195 | -1.82799341  | 0.068472825 | 0.158333279 | no |
| XPR1         | 0.101180828  | 1.827822452  | 0.068498556 | 0.158375735 | no |
| OR10V2P      | 0.101156104  | 1.827371189  | 0.068566512 | 0.158515803 | no |
| ARHGEF15     | 0.101112516  | 1.826575641  | 0.06868645  | 0.158776002 | no |
| UBE2G2       | -0.101107244 | -1.826479413 | 0.068700969 | 0.158792485 | no |
| ATXN7        | -0.101101063 | -1.826366605 | 0.068717993 | 0.158814753 | no |
| HSPB9        | -0.1010953   | -1.826261436 | 0.068733867 | 0.158823813 | no |
| REP15        | 0.101094275  | 1.826242711  | 0.068736694 | 0.158823813 | no |
| SPIN2A       | -0.101061683 | -1.825647877 | 0.068826539 | 0.159014315 | no |
| GIGYF2       | -0.101058555 | -1.825590789 | 0.068835167 | 0.159017153 | no |
| HEATR5B      | -0.101038423 | -1.825223362 | 0.068890718 | 0.159128378 | no |
| SPDYE3       | 0.101024981  | 1.824978026  | 0.068927831 | 0.159187368 | no |
| ZFP69        | -0.101023808 | -1.824956614 | 0.068931071 | 0.159187368 | no |
| RBM10        | -0.100991417 | -1.824365451 | 0.06902057  | 0.159376928 | no |
| C15orf53     | 0.100980569  | 1.824167483  | 0.069050563 | 0.159428251 | no |
| POP7         | -0.100978013 | -1.824120828 | 0.069057633 | 0.159428251 | no |
| ANKRD7       | 0.100954443  | 1.823690655  | 0.069122848 | 0.159561667 | no |
| PIGQ         | 0.100949649  | 1.823603172  | 0.069136117 | 0.159575156 | no |
| TCEB3        | 0.100918105  | 1.823027482  | 0.069223486 | 0.159759657 | no |
| RCBTB2       | 0.100862774  | 1.822017683  | 0.069376957 | 0.160083164 | no |
| DKK1         | 0.100862197  | 1.822007158  | 0.069378558 | 0.160083164 | no |
| ZNF330       | 0.100854113  | 1.821859619  | 0.069401005 | 0.160117767 | no |
| RAB13        | 0.100843053  | 1.821657766  | 0.069431725 | 0.160171448 | no |
| LRRC47       | -0.100838384 | -1.821572566 | 0.069444696 | 0.160184175 | no |
| LANCL2       | 0.100819965  | 1.821236419  | 0.069495887 | 0.160285052 | no |
| PLEKHH1      | -0.100810255 | -1.821059216 | 0.069522886 | 0.160327489 | no |
| ZDHHC23      | 0.100807982  | 1.821017735  | 0.069529207 | 0.160327489 | no |
| GTF3C4       | -0.100778263 | -1.820475385 | 0.0696119   | 0.160500949 | no |
| CDK2AP1      | -0.100771624 | -1.820354222 | 0.069630385 | 0.160526346 | no |
| WBP1L        | -0.100757208 | -1.820091129 | 0.069670537 | 0.160601685 | no |
| ZNF263       | -0.100732915 | -1.819647797 | 0.069738239 | 0.160740508 | no |
| GTF2IRD2B    | -0.100727395 | -1.819547074 | 0.069753629 | 0.160758738 | no |
| LMCD1-AS1    | -0.100719395 | -1.81940108  | 0.06977594  | 0.160792915 | no |
| ZNF70        | -0.100709751 | -1.819225075 | 0.069802845 | 0.160837669 | no |
| MTMR8        | 0.100670882  | 1.818515757  | 0.069911363 | 0.161070443 | no |
| LOC286083    | -0.100640071 | -1.817953499 | 0.069997481 | 0.161251565 | no |
| RTKN2        | -0.100637078 | -1.817898871 | 0.070005852 | 0.161253566 | no |
| DUSP28       | -0.100623694 | -1.817654636 | 0.070043291 | 0.161322513 | no |
| LOC100130301 | -0.100620117 | -1.817589366 | 0.070053299 | 0.161328274 | no |



|              |              |              |             |             |    |
|--------------|--------------|--------------|-------------|-------------|----|
| MY01D        | 0.100601828  | 1.817255602  | 0.070104495 | 0.161428876 | no |
| LOC100506124 | -0.100586609 | -1.81697788  | 0.070147118 | 0.161509719 | no |
| HCFC2        | -0.100576853 | -1.816799863 | 0.07017445  | 0.161555341 | no |
| LOC100506123 | -0.10049509  | -1.815307833 | 0.070403877 | 0.162048462 | no |
| DI02         | 0.100492805  | 1.815266129  | 0.070410299 | 0.162048462 | no |
| SIGLEC16     | 0.100490197  | 1.815218542  | 0.070417627 | 0.162048462 | no |
| XPA          | -0.100489777 | -1.815210878 | 0.070418807 | 0.162048462 | no |
| LYNX1        | -0.100477347 | -1.814984061 | 0.070453745 | 0.162111502 | no |
| ZBED2        | 0.100465057  | 1.814759787  | 0.070488304 | 0.162173659 | no |
| FAM127C      | 0.100453714  | 1.8145528    | 0.070520213 | 0.162229704 | no |
| EXOSC10      | 0.100448695  | 1.814461227  | 0.070534333 | 0.16224482  | no |
| LINC00307    | 0.100434588  | 1.814203803  | 0.07057404  | 0.162318781 | no |
| SLC35G2      | 0.100429181  | 1.814105146  | 0.070589262 | 0.162336418 | no |
| NMRK2        | -0.100422134 | -1.813976548 | 0.070609108 | 0.162364685 | no |
| PLA2G7       | 0.100411852  | 1.813788925  | 0.070638072 | 0.162396593 | no |
| ZNF773       | 0.100411843  | 1.813788757  | 0.070638098 | 0.162396593 | no |
| HNF1A-AS1    | -0.10040185  | -1.813606415 | 0.070666255 | 0.162443951 | no |
| EDF1         | -0.100397144 | -1.813520545 | 0.070679519 | 0.162457063 | no |
| VSX2         | -0.1003909   | -1.813406607 | 0.070697121 | 0.162480144 | no |
| NDEL1        | 0.100362491  | 1.812888219  | 0.070777251 | 0.162645205 | no |
| MMP28        | -0.100360072 | -1.81284408  | 0.070784077 | 0.162645205 | no |
| KEAP1        | -0.10035009  | -1.812661931 | 0.070812253 | 0.162692552 | no |
| ABCF1        | -0.100346258 | -1.812592006 | 0.070823072 | 0.162700015 | no |
| SLC8A1-AS1   | 0.100342351  | 1.812520724  | 0.070834102 | 0.162707962 | no |
| SCML1        | 0.100322499  | 1.812158487  | 0.070890177 | 0.162819364 | no |
| COL9A1       | -0.100296687 | -1.811687488 | 0.070963142 | 0.162969533 | no |
| FBXL8        | 0.100260825  | 1.811033135  | 0.071064615 | 0.163185131 | no |
| ODF2         | 0.100245207  | 1.810748147  | 0.071108847 | 0.163269254 | no |
| LOC649352    | -0.100238113 | -1.810618719 | 0.071128942 | 0.163296579 | no |
| DMXL2        | -0.100235642 | -1.810573626 | 0.071135944 | 0.163296579 | no |
| BHLHA9       | -0.100219352 | -1.810276395 | 0.071182114 | 0.163369518 | no |
| UST          | -0.100218629 | -1.810263206 | 0.071184164 | 0.163369518 | no |
| WBP11        | -0.100216386 | -1.81022228  | 0.071190523 | 0.163369518 | no |
| ASCC3        | 0.100209722  | 1.810100678  | 0.071209421 | 0.163390362 | no |
| ARL9         | 0.100207821  | 1.810065994  | 0.071214812 | 0.163390362 | no |
| KCNMB2       | -0.100194833 | -1.809829006 | 0.071251656 | 0.163457444 | no |
| ATP13A2      | -0.100191941 | -1.809776249 | 0.07125986  | 0.163458817 | no |
| LOC100289137 | -0.100159528 | -1.809184835 | 0.071351883 | 0.163652436 | no |
| CRIP1        | 0.100126683  | 1.808585538  | 0.071445233 | 0.163849055 | no |
| PRRC2A       | -0.10011432  | -1.808359967 | 0.071480395 | 0.163912203 | no |
| EFHD2        | 0.100099131  | 1.808082821  | 0.071523616 | 0.163993815 | no |
| PLEKHF2      | 0.100094567  | 1.807999548  | 0.071536607 | 0.164006104 | no |
| PPP2CA       | -0.100062082 | -1.807406841 | 0.071629126 | 0.164194769 | no |
| LRRC37A11P   | 0.100060308  | 1.807374485  | 0.071634179 | 0.164194769 | no |
| TM4SF19      | 0.100035957  | 1.806930185  | 0.071703602 | 0.164336366 | no |
| SFMBT1       | 0.100031098  | 1.806841527  | 0.071717461 | 0.164350603 | no |
| SCARNA3      | -0.100023841 | -1.806709125 | 0.071738163 | 0.164380516 | no |
| LOC401127    | -0.100018082 | -1.806604056 | 0.071754595 | 0.164385304 | no |
| LRRC34       | 0.100017747  | 1.806597943  | 0.071755551 | 0.164385304 | no |
| MRPL34       | 0.100011856  | 1.806490455  | 0.071772364 | 0.164406297 | no |
| ALG10B       | -0.100007853 | -1.806417411 | 0.071783792 | 0.164414949 | no |

|              |              |              |             |             |    |
|--------------|--------------|--------------|-------------|-------------|----|
| PRRC1        | 0.100003847  | 1.806344329  | 0.071795226 | 0.164423616 | no |
| GUSBP1       | -0.099984351 | -1.805988619 | 0.071850905 | 0.164533595 | no |
| ANKS6        | -0.099978477 | -1.805881446 | 0.071867687 | 0.164554492 | no |
| RAB11A       | 0.099962068  | 1.805582062  | 0.071914585 | 0.164644333 | no |
| CDON         | -0.099954637 | -1.805446491 | 0.071935831 | 0.164668958 | no |
| C8orf37      | -0.099952946 | -1.805415641 | 0.071940666 | 0.164668958 | no |
| RPL14        | -0.099920999 | -1.804832762 | 0.072032073 | 0.164860626 | no |
| C1orf227     | 0.099901166  | 1.804470913  | 0.072088866 | 0.16497304  | no |
| ANKRD18A     | -0.09988743  | -1.804220305 | 0.072128221 | 0.165045528 | no |
| SYMPK        | -0.099855123 | -1.803630887 | 0.072220852 | 0.16522412  | no |
| PPAP2A       | 0.099853953  | 1.803609542  | 0.072224209 | 0.16522412  | no |
| TBC1D28      | -0.099852167 | -1.803576953 | 0.072229333 | 0.16522412  | no |
| HHLA2        | 0.09983285   | 1.803224536  | 0.07228477  | 0.165333333 | no |
| RBMX2        | -0.09981573  | -1.802912186 | 0.072333934 | 0.165428176 | no |
| ZNF16        | -0.099795246 | -1.802538476 | 0.072392791 | 0.165545167 | no |
| SPC24        | -0.099789617 | -1.802435783 | 0.072408972 | 0.165564551 | no |
| CD24         | -0.099764549 | -1.801978444 | 0.072481067 | 0.165711768 | no |
| RAP1GDS1     | -0.099736825 | -1.801472648 | 0.07256087  | 0.165876574 | no |
| PEX13        | 0.09972986   | 1.801345582  | 0.07258093  | 0.165904783 | no |
| PDCL2        | 0.099726172  | 1.801278292  | 0.072591555 | 0.165911422 | no |
| DNAJC25      | 0.099720857  | 1.80118134   | 0.072606865 | 0.165928768 | no |
| SCNN1D       | -0.09971688  | -1.801108774 | 0.072618326 | 0.165937315 | no |
| KLHDC10      | -0.099702987 | -1.800855322 | 0.072658368 | 0.166011163 | no |
| LOC100288122 | -0.099694685 | -1.800703865 | 0.072682305 | 0.166048201 | no |
| HSF4         | -0.099691576 | -1.80064714  | 0.072691272 | 0.166051034 | no |
| LGALS8       | 0.099681224  | 1.800458293  | 0.07272113  | 0.166069344 | no |
| ZNF862       | -0.099679041 | -1.800418466 | 0.072727429 | 0.166069344 | no |
| LOC653160    | 0.099678919  | 1.800416243  | 0.07272778  | 0.166069344 | no |
| RGS7         | -0.099678082 | -1.80040096  | 0.072730197 | 0.166069344 | no |
| NCEH1        | 0.099637879  | 1.79966754   | 0.072846265 | 0.166316698 | no |
| ART3         | -0.099560446 | -1.798254925 | 0.073070248 | 0.166810357 | no |
| HDAC2        | -0.099508602 | -1.797309156 | 0.073220524 | 0.167135665 | no |
| ATP6V1E2     | -0.099502389 | -1.797195818 | 0.07323855  | 0.167155824 | no |
| DHCR7        | -0.099500197 | -1.797155825 | 0.073244911 | 0.167155824 | no |
| MEX3D        | -0.099494505 | -1.797051981 | 0.073261431 | 0.167171647 | no |
| TNKS2        | -0.099492447 | -1.797014453 | 0.073267402 | 0.167171647 | no |
| FAM90A25P    | 0.09947287   | 1.796657318  | 0.073324245 | 0.167283582 | no |
| HSPB3        | -0.099466398 | -1.79653926  | 0.073343043 | 0.167308708 | no |
| GOLT1B       | 0.099452992  | 1.796294705  | 0.073381996 | 0.1673798   | no |
| CCDC113      | -0.09943565  | -1.795978335 | 0.073432413 | 0.167477023 | no |
| SPATA31D4    | 0.099432203  | 1.795915456  | 0.073442437 | 0.16748211  | no |
| KRT81        | 0.099428987  | 1.795856799  | 0.073451788 | 0.167485664 | no |
| OGFR         | 0.099424694  | 1.795778489  | 0.073464275 | 0.167496365 | no |
| PLCD3        | -0.099417182 | -1.795641456 | 0.073486129 | 0.167528419 | no |
| TXNL4A       | -0.099412112 | -1.795548963 | 0.073500883 | 0.167544281 | no |
| FLJ42875     | -0.099400586 | -1.795338707 | 0.073534431 | 0.167602976 | no |
| SOX9         | -0.099395647 | -1.795248613 | 0.07354881  | 0.167617973 | no |
| UBAP2L       | -0.099387514 | -1.795100247 | 0.073572495 | 0.167654171 | no |
| CBLN4        | -0.099363206 | -1.794656829 | 0.073643317 | 0.167797765 | no |
| TNRC6A       | -0.099344419 | -1.794314122 | 0.073698092 | 0.167904769 | no |
| ATP6V1C1     | -0.099341103 | -1.794253632 | 0.073707763 | 0.167909004 | no |

|            |              |              |             |             |    |
|------------|--------------|--------------|-------------|-------------|----|
| TUBA3D     | -0.099311927 | -1.793721424 | 0.073792902 | 0.168085136 | no |
| ZG16B      | 0.099307964  | 1.793649123  | 0.073804474 | 0.168093679 | no |
| GPANK1     | -0.099296001 | -1.793430913 | 0.07383941  | 0.168155426 | no |
| PIK3R5     | 0.099291565  | 1.793349981  | 0.07385237  | 0.168167122 | no |
| RPSAP52    | 0.099272478  | 1.793001821  | 0.073908147 | 0.168276299 | no |
| ZRANB2-AS1 | 0.09926878   | 1.792934357  | 0.073918959 | 0.168283088 | no |
| CPSF7      | -0.099259037 | -1.79275663  | 0.073947448 | 0.168330115 | no |
| ARHGEF33   | -0.099252308 | -1.792633902 | 0.073967127 | 0.168357077 | no |
| XKRX       | 0.099247787  | 1.792551433  | 0.073980352 | 0.168369348 | no |
| EIF1AX     | -0.099224633 | -1.792129082 | 0.074048115 | 0.168505723 | no |
| SPO11      | 0.099220848  | 1.792060026  | 0.0740592   | 0.168513103 | no |
| KRTAP5-7   | -0.099213628 | -1.791928332 | 0.074080342 | 0.168543365 | no |
| FBX025     | -0.099201969 | -1.79171566  | 0.074114495 | 0.168603219 | no |
| FLJ41278   | -0.099188497 | -1.791469919 | 0.074153975 | 0.168675177 | no |
| USP43      | -0.099182709 | -1.791364351 | 0.07417094  | 0.168686032 | no |
| RBM18      | -0.099181514 | -1.791342543 | 0.074174445 | 0.168686032 | no |
| MSMP       | 0.099151062  | 1.790787092  | 0.074263766 | 0.168871293 | no |
| SPSB4      | -0.099139289 | -1.79057235  | 0.074298321 | 0.168931996 | no |
| BRWD1-AS1  | -0.09913605  | -1.790513268 | 0.074307831 | 0.168935745 | no |
| SNX16      | -0.099129125 | -1.79038694  | 0.074328168 | 0.168964105 | no |
| ATPBD4-AS1 | 0.099118988  | 1.790202042  | 0.074357941 | 0.16901391  | no |
| FKBP1B     | -0.0991116   | -1.790067283 | 0.074379647 | 0.169043476 | no |
| ABCC12     | -0.099109206 | -1.790023624 | 0.074386681 | 0.169043476 | no |
| RRNAD1     | -0.099092865 | -1.789725547 | 0.074434715 | 0.16913475  | no |
| ZNF677     | -0.099090017 | -1.789673612 | 0.074443087 | 0.16913589  | no |
| PARN       | 0.099077853  | 1.789451724  | 0.074478864 | 0.169189688 | no |
| MOXD1      | 0.099076613  | 1.789429108  | 0.074482511 | 0.169189688 | no |
| PTGER3     | -0.099049408 | -1.788932901 | 0.074562572 | 0.16935365  | no |
| KIR3DL1    | 0.099026442  | 1.788513998  | 0.074630216 | 0.16948717  | no |
| ING3       | -0.099024095 | -1.788471193 | 0.074637131 | 0.16948717  | no |
| ATP6V1F    | 0.09901947   | 1.788386831  | 0.07465076  | 0.16950021  | no |
| KRT36      | 0.099005237  | 1.788127215  | 0.074692717 | 0.169561834 | no |
| TIPRL      | -0.09900491  | -1.788121256 | 0.07469368  | 0.169561834 | no |
| PPP1R1B    | -0.098953658 | -1.787186441 | 0.074844919 | 0.169887216 | no |
| PGRMC2     | -0.098925792 | -1.786678188 | 0.074927252 | 0.170056139 | no |
| CYP4F24P   | -0.098919742 | -1.786567834 | 0.074945139 | 0.170078772 | no |
| SNORA44    | 0.098911346  | 1.7864147    | 0.074969964 | 0.170117148 | no |
| TRAPPC6A   | -0.098907188 | -1.786338865 | 0.074982261 | 0.170127088 | no |
| RPL5       | -0.098870043 | -1.785661369 | 0.075092192 | 0.170358524 | no |
| OBSCN      | -0.09886587  | -1.785585259 | 0.07510455  | 0.170368575 | no |
| G2E3       | -0.09884835  | -1.785265715 | 0.075156452 | 0.170455641 | no |
| ZEB1-AS1   | -0.09884756  | -1.785251296 | 0.075158795 | 0.170455641 | no |
| OR51E2     | 0.098795571  | 1.7843031    | 0.075312983 | 0.170787309 | no |
| WBSCR16    | 0.098783371  | 1.784080583  | 0.075349205 | 0.170851421 | no |
| HYAL2      | 0.098780276  | 1.784024134  | 0.075358396 | 0.170854235 | no |
| ZNF451     | -0.098777228 | -1.783968541 | 0.075367449 | 0.170856734 | no |
| CXCL3      | 0.098761814  | 1.783687406  | 0.075413242 | 0.170937349 | no |
| DLGAP1     | -0.098759904 | -1.783652576 | 0.075418917 | 0.170937349 | no |
| MDM1       | 0.098749499  | 1.783462818  | 0.075449841 | 0.170989405 | no |
| LOC284757  | 0.098731518  | 1.783134872  | 0.075503309 | 0.171092535 | no |
| PDE12      | 0.098726167  | 1.783037266  | 0.075519228 | 0.171110568 | no |

|              |              |              |             |             |    |
|--------------|--------------|--------------|-------------|-------------|----|
| FAM65B       | -0.098712298 | -1.782784323 | 0.075560496 | 0.171186024 | no |
| ULK1         | -0.09869687  | -1.782502947 | 0.075606425 | 0.171272022 | no |
| SEMA4A       | -0.098690709 | -1.782390591 | 0.075624771 | 0.171293783 | no |
| PBOV1        | -0.098688291 | -1.782346496 | 0.075631972 | 0.171293783 | no |
| MIR1250      | -0.098679752 | -1.782190752 | 0.075657411 | 0.171333342 | no |
| GPR25        | 0.098675079  | 1.782105521  | 0.075671335 | 0.171346819 | no |
| TMEM161B     | -0.098659829 | -1.781827396 | 0.075716787 | 0.171431677 | no |
| THBS3        | 0.098625395  | 1.781199401  | 0.075819499 | 0.171629938 | no |
| OSGEP        | -0.098625118 | -1.781194348 | 0.075820326 | 0.171629938 | no |
| WDR11        | 0.098609354  | 1.780906855  | 0.075867386 | 0.171714735 | no |
| PPIE         | -0.098607217 | -1.780867884 | 0.075873767 | 0.171714735 | no |
| CHRNE        | 0.098601799  | 1.780769071  | 0.075889948 | 0.171733271 | no |
| SFR1         | -0.098588552 | -1.780527472 | 0.075929523 | 0.171796059 | no |
| NPY          | -0.09858716  | -1.78050209  | 0.075933682 | 0.171796059 | no |
| VOPP1        | 0.098567754  | 1.780148174  | 0.075991689 | 0.171894844 | no |
| ETFDH        | 0.098567201  | 1.78013809   | 0.075993342 | 0.171894844 | no |
| PWWP2B       | -0.098546271 | -1.779756383 | 0.076055946 | 0.172018346 | no |
| ZSCAN16      | -0.098531994 | -1.779496009 | 0.076098674 | 0.172096874 | no |
| CAMK2B       | -0.098513796 | -1.779164138 | 0.076153163 | 0.17220198  | no |
| LOC100287036 | 0.09850287   | 1.77896488   | 0.076185894 | 0.172257869 | no |
| ZNF444       | -0.098482964 | -1.778601845 | 0.076245558 | 0.172374635 | no |
| SS18L2       | -0.098473976 | -1.778437944 | 0.076272507 | 0.17239996  | no |
| GMPR         | 0.098473877  | 1.77843614   | 0.076272803 | 0.17239996  | no |
| ASAP1-IT1    | -0.098470532 | -1.778375133 | 0.076282836 | 0.172404505 | no |
| PDLIM3       | 0.09846351   | 1.778247068  | 0.076303901 | 0.172433979 | no |
| LINC00662    | -0.098431369 | -1.777660922 | 0.076400374 | 0.172633838 | no |
| AUH          | -0.098422172 | -1.777493213 | 0.076427995 | 0.172660078 | no |
| FAM110D      | 0.098422153  | 1.77749285   | 0.076428055 | 0.172660078 | no |
| CLCNKB       | 0.098417599  | 1.777409812  | 0.076441734 | 0.17267283  | no |
| LTA          | 0.09841048   | 1.77727999   | 0.076463124 | 0.172702995 | no |
| TXNL1        | -0.098405277 | -1.777185109 | 0.07647876  | 0.172720159 | no |
| ZNF565       | -0.098398727 | -1.777065656 | 0.076498449 | 0.172746472 | no |
| IMP3         | -0.098394751 | -1.776993149 | 0.076510403 | 0.172755312 | no |
| PCDHGB7      | -0.098386841 | -1.776848893 | 0.076534189 | 0.172790866 | no |
| PDIA6        | 0.09836401   | 1.776432545  | 0.076602874 | 0.172927769 | no |
| EREG         | 0.098359451  | 1.776349394  | 0.076616597 | 0.172940583 | no |
| FA2H         | -0.098330782 | -1.775826585 | 0.076702929 | 0.17311727  | no |
| AGAP7        | 0.098310522  | 1.775457125  | 0.076763986 | 0.173236882 | no |
| NCOA6        | -0.098294649 | -1.77516768  | 0.076811848 | 0.173326693 | no |
| TNNI3K       | -0.09828048  | -1.774909293 | 0.076854595 | 0.173404945 | no |
| BTBD3        | -0.098272963 | -1.774772209 | 0.076877281 | 0.173437923 | no |
| GLI1         | 0.098268167  | 1.774684749  | 0.076891758 | 0.173447276 | no |
| PPWD1        | 0.098264291  | 1.774614076  | 0.076903458 | 0.173447276 | no |
| ADAMTS8      | -0.098263569 | -1.774600903 | 0.076905639 | 0.173447276 | no |
| KANK4        | -0.098190068 | -1.773260577 | 0.077127812 | 0.173930095 | no |
| RAD21-AS1    | -0.098172003 | -1.772931149 | 0.077182498 | 0.174035156 | no |
| SPRR2B       | 0.098159539  | 1.772703884  | 0.077220244 | 0.174096115 | no |
| SORBS1       | -0.098157191 | -1.772661052 | 0.077227359 | 0.174096115 | no |
| CADM1        | 0.098155053  | 1.772622071  | 0.077233836 | 0.174096115 | no |
| LAMB4        | 0.098149651  | 1.772523575  | 0.077250201 | 0.174114743 | no |
| C1orf56      | -0.098139662 | -1.772341414 | 0.077280476 | 0.174164714 | no |

|              |              |              |             |             |    |
|--------------|--------------|--------------|-------------|-------------|----|
| SNORA49      | -0.098088467 | -1.771407888 | 0.077435779 | 0.174496417 | no |
| SMIM2-IT1    | -0.09803635  | -1.770457548 | 0.077594141 | 0.174834944 | no |
| C7orf61      | -0.098014998 | -1.770068208 | 0.077659097 | 0.174953652 | no |
| IDE          | 0.09801368   | 1.770044176  | 0.077663107 | 0.174953652 | no |
| LOC100506136 | -0.097991944 | -1.769647843 | 0.077729278 | 0.17507586  | no |
| LAMC2        | 0.097989281  | 1.769599279  | 0.077737389 | 0.17507586  | no |
| ARMC4        | 0.097987834  | 1.769572896  | 0.077741796 | 0.17507586  | no |
| SLC5A6       | 0.097978258  | 1.769398292  | 0.077770966 | 0.1751232   | no |
| MALSU1       | 0.09795856   | 1.769039108  | 0.077831    | 0.17523354  | no |
| TNS3         | 0.09795683   | 1.769007561  | 0.077836274 | 0.17523354  | no |
| GTF3C1       | 0.097947841  | 1.768843663  | 0.077863682 | 0.175276883 | no |
| GCNT2        | -0.097930229 | -1.768522523 | 0.077917409 | 0.17537152  | no |
| URB1         | 0.097925172  | 1.768430321  | 0.077932839 | 0.17537152  | no |
| TAL2         | -0.09792485  | -1.768424449 | 0.077933822 | 0.17537152  | no |
| SPRED3       | 0.097923362  | 1.768397312  | 0.077938364 | 0.17537152  | no |
| HOTTIP       | -0.097865803 | -1.767347798 | 0.078114196 | 0.175748763 | no |
| ST6GAL1      | 0.097858588  | 1.767216241  | 0.07813626  | 0.175780001 | no |
| MRC2         | 0.097843121  | 1.76693423   | 0.078183573 | 0.175868031 | no |
| TMEM211      | -0.097838378 | -1.766847743 | 0.078198088 | 0.175882271 | no |
| ZC4H2        | -0.097819084 | -1.766495958 | 0.078257149 | 0.175996691 | no |
| LIN9         | -0.097813138 | -1.766387534 | 0.078275359 | 0.176019226 | no |
| UTP14A       | 0.097792404  | 1.766009492  | 0.078338882 | 0.176143639 | no |
| HOXA13       | -0.097749819 | -1.765233045 | 0.07846948  | 0.176409812 | no |
| PI16         | -0.097746643 | -1.765175128 | 0.078479229 | 0.176409812 | no |
| DOCK6        | 0.097745777  | 1.765159342  | 0.078481886 | 0.176409812 | no |
| CNKSR1       | -0.09773692  | -1.764997852 | 0.078509074 | 0.176452469 | no |
| RING1        | -0.097730378 | -1.764878582 | 0.078529159 | 0.176479156 | no |
| ALDH1B1      | -0.097708473 | -1.764479178 | 0.07859645  | 0.176608765 | no |
| MRPS7        | -0.097706254 | -1.764438725 | 0.078603268 | 0.176608765 | no |
| 41883        | -0.097678989 | -1.763941613 | 0.078687092 | 0.176778623 | no |
| CSNK2A1      | -0.097661032 | -1.763614217 | 0.078742338 | 0.176882277 | no |
| GALNT14      | -0.097658643 | -1.763570654 | 0.078749692 | 0.176882277 | no |
| TRRAP        | -0.097641664 | -1.763261084 | 0.078801963 | 0.176981188 | no |
| RSAD1        | -0.097630149 | -1.76305115  | 0.078837427 | 0.177042335 | no |
| ANKRD50      | -0.097592679 | -1.762367988 | 0.078952923 | 0.177279887 | no |
| HIST1H2BD    | 0.097590479  | 1.76232788   | 0.078959708 | 0.177279887 | no |
| CAP1         | 0.09757923   | 1.76212279   | 0.078994409 | 0.177339272 | no |
| DUSP14       | 0.097566461  | 1.761889976  | 0.079033818 | 0.177392439 | no |
| PRSS54       | -0.097566207 | -1.76188535  | 0.079034601 | 0.177392439 | no |
| GGA1         | -0.097559874 | -1.761769879 | 0.079054152 | 0.177417794 | no |
| ZPLD1        | 0.097548679  | 1.761565784  | 0.07908872  | 0.177476838 | no |
| DIAPH2       | 0.097528637  | 1.761200386  | 0.079150638 | 0.177597239 | no |
| FAM92A1P2    | -0.097522107 | -1.761081336 | 0.07917082  | 0.1776217   | no |
| HIST1H2AG    | 0.097519762  | 1.761038578  | 0.079178069 | 0.1776217   | no |
| YWHAG        | -0.097499661 | -1.760672094 | 0.079240229 | 0.17774259  | no |
| CDIPT        | 0.097490747  | 1.76050959   | 0.079267804 | 0.177785887 | no |
| MGC16025     | -0.09748769  | -1.760453843 | 0.079277265 | 0.177788553 | no |
| CCL11        | 0.097467273  | 1.760081618  | 0.079340463 | 0.177911717 | no |
| COL18A1-AS2  | -0.097433271 | -1.759461716 | 0.079445804 | 0.178129345 | no |
| ZNF322       | -0.097403024 | -1.758910282 | 0.079539606 | 0.17832106  | no |
| HMGN3        | -0.097399588 | -1.758847647 | 0.079550267 | 0.178326356 | no |

|              |              |              |             |             |    |
|--------------|--------------|--------------|-------------|-------------|----|
| ZFYVE28      | 0.097388629  | 1.758647846  | 0.07958428  | 0.178383996 | no |
| GUSBP3       | -0.09738589  | -1.75859792  | 0.079592781 | 0.178384446 | no |
| LOC554206    | -0.097374401 | -1.758388467 | 0.079628453 | 0.178445786 | no |
| PGAP2        | -0.097362714 | -1.758175397 | 0.079664755 | 0.17849094  | no |
| GTF2IRD1P1   | 0.09736243   | 1.758170225  | 0.079665636 | 0.17849094  | no |
| C20orf96     | 0.097359893  | 1.758123972  | 0.079673518 | 0.17849094  | no |
| TRDN         | 0.097311746  | 1.757246214  | 0.079823222 | 0.178801145 | no |
| URGCP        | -0.09731001  | -1.757214559 | 0.079828625 | 0.178801145 | no |
| LOC158572    | 0.097293308  | 1.756910076  | 0.079880612 | 0.178898941 | no |
| MGC27345     | -0.097277544 | -1.756622703 | 0.079929703 | 0.178990231 | no |
| RESP18       | -0.097253456 | -1.756183565 | 0.080004767 | 0.179139659 | no |
| DMRTB1       | -0.097219406 | -1.755562834 | 0.080110969 | 0.179341262 | no |
| TTC30B       | 0.097219238  | 1.755559769  | 0.080111494 | 0.179341262 | no |
| ACP6         | 0.097203003  | 1.755263804  | 0.080162172 | 0.179436022 | no |
| RSP02        | -0.097196664 | -1.755148238 | 0.080181968 | 0.17946164  | no |
| PIGH         | -0.097178644 | -1.754819732 | 0.08023826  | 0.179553881 | no |
| YTHDF1       | 0.097177571  | 1.754800181  | 0.080241611 | 0.179553881 | no |
| SH3RF1       | -0.097175448 | -1.754761484 | 0.080248245 | 0.179553881 | no |
| MIR5193      | 0.097154654  | 1.754382406  | 0.080313249 | 0.179664815 | no |
| CYP21A1P     | 0.09715424   | 1.754374855  | 0.080314545 | 0.179664815 | no |
| PNKD         | -0.097121688 | -1.753781447 | 0.080416391 | 0.179873923 | no |
| RORB         | -0.097118792 | -1.753728657 | 0.080425456 | 0.179875479 | no |
| ATP6V1C2     | -0.097099924 | -1.753384703 | 0.080484542 | 0.179988897 | no |
| CDC45        | -0.097096384 | -1.753320177 | 0.080495631 | 0.179994964 | no |
| GADD45GIP1   | -0.097091681 | -1.75323444  | 0.080510366 | 0.180009185 | no |
| NOXA1        | -0.097087264 | -1.753153915 | 0.080524208 | 0.180021404 | no |
| ZCCHC16      | -0.097072095 | -1.752877409 | 0.080571753 | 0.18010144  | no |
| SH3BGR       | 0.097070495  | 1.752848242  | 0.080576769 | 0.18010144  | no |
| ABCE1        | -0.097063945 | -1.752728836 | 0.080597309 | 0.180128615 | no |
| S100P        | 0.097058638  | 1.752632093  | 0.080613953 | 0.18014708  | no |
| ANKRD49      | 0.097051009  | 1.752493029  | 0.080637884 | 0.180176828 | no |
| DMRTA1       | 0.097047827  | 1.752435008  | 0.08064787  | 0.180176828 | no |
| CDKL2        | -0.097046378 | -1.752408592 | 0.080652417 | 0.180176828 | no |
| H1FX-AS1     | -0.097036125 | -1.7522217   | 0.080684591 | 0.180229971 | no |
| LOC100505875 | -0.097022943 | -1.751981396 | 0.080725977 | 0.180303676 | no |
| THUMPDI      | -0.097010468 | -1.751753996 | 0.080765156 | 0.180372437 | no |
| SPATA12      | 0.09700612   | 1.751674742  | 0.080778814 | 0.180384195 | no |
| COX15        | -0.096997861 | -1.75152419  | 0.080804765 | 0.180423398 | no |
| MAST4        | 0.096994412  | 1.751461317  | 0.080815605 | 0.180428855 | no |
| KCNS3        | 0.096982232  | 1.751239289  | 0.080853893 | 0.180495586 | no |
| LOC286114    | 0.096971624  | 1.751045921  | 0.08088725  | 0.180551298 | no |
| SLMAP        | 0.096927548  | 1.750242469  | 0.081025973 | 0.180842163 | no |
| NAF1         | -0.096915808 | -1.750028479 | 0.081062953 | 0.18090591  | no |
| TEX15        | -0.096902633 | -1.749788311 | 0.081104473 | 0.180979776 | no |
| CAPN12       | 0.09688025   | 1.749380307  | 0.081175048 | 0.181118455 | no |
| TMCO6        | 0.09687343   | 1.749255988  | 0.081196562 | 0.181147651 | no |
| POMP         | 0.096865164  | 1.749105316  | 0.081222643 | 0.181187028 | no |
| SLC5A11      | -0.096859645 | -1.749004716 | 0.081240061 | 0.181207073 | no |
| OTOA         | 0.096855636  | 1.748931638  | 0.081252715 | 0.181216491 | no |
| NME5         | 0.096848742  | 1.74880597   | 0.08127448  | 0.181246223 | no |
| BEX5         | -0.096840682 | -1.748659055 | 0.081299931 | 0.181284168 | no |

|           |              |              |             |             |    |
|-----------|--------------|--------------|-------------|-------------|----|
| MRP63     | -0.096829034 | -1.748446741 | 0.081336722 | 0.18134739  | no |
| SGMS1     | -0.096821337 | -1.748306434 | 0.081361043 | 0.181382798 | no |
| CWC25     | -0.096801331 | -1.747941779 | 0.08142428  | 0.181491052 | no |
| PDE6H     | -0.096800632 | -1.747929031 | 0.081426491 | 0.181491052 | no |
| KCNH6     | -0.096788008 | -1.747698924 | 0.081466417 | 0.181561212 | no |
| IGSF22    | -0.096759978 | -1.747187996 | 0.081555125 | 0.181738396 | no |
| INTS2     | -0.096757543 | -1.747143627 | 0.081562832 | 0.181738396 | no |
| LPP       | 0.096751921  | 1.747041149  | 0.081580636 | 0.181759221 | no |
| SNX11     | 0.096743489  | 1.746887445  | 0.081607344 | 0.181762623 | no |
| JOSD2     | 0.096743295  | 1.746883911  | 0.081607958 | 0.181762623 | no |
| GGNBP1    | -0.096743196 | -1.746882107 | 0.081608272 | 0.181762623 | no |
| MIS12     | -0.096740759 | -1.746837678 | 0.081615993 | 0.181762623 | no |
| ZC3H8     | -0.096728409 | -1.746612571 | 0.081655126 | 0.18183093  | no |
| PHF21A    | -0.09672077  | -1.746473337 | 0.081679338 | 0.181866001 | no |
| TDRD1     | 0.096692578  | 1.745959471  | 0.081768746 | 0.182046215 | no |
| ARMC1     | -0.096688613 | -1.745887212 | 0.081781325 | 0.18205536  | no |
| WAC-AS1   | -0.096683422 | -1.745792578 | 0.081797801 | 0.182073179 | no |
| MAN2A2    | -0.096675437 | -1.745647048 | 0.081823144 | 0.182110728 | no |
| CHID1     | 0.096620236  | 1.74464089   | 0.081998533 | 0.182482186 | no |
| NONO      | -0.096587101 | -1.744036948 | 0.082103957 | 0.182697881 | no |
| F8A1      | 0.096575085  | 1.743817933  | 0.082142215 | 0.182739115 | no |
| SPG7      | -0.096572194 | -1.743765251 | 0.08215142  | 0.182739115 | no |
| DMAP1     | -0.096571786 | -1.743757802 | 0.082152722 | 0.182739115 | no |
| KCNE2     | -0.096570599 | -1.743736181 | 0.0821565   | 0.182739115 | no |
| DAND5     | -0.096551827 | -1.743394019 | 0.082216307 | 0.182853219 | no |
| PRKACB    | -0.09654355  | -1.743243173 | 0.082242685 | 0.182892958 | no |
| MYCBPAP   | 0.096524046  | 1.742887685  | 0.082304876 | 0.183012322 | no |
| ZSCAN1    | -0.096513523 | -1.742695879 | 0.082338448 | 0.18306803  | no |
| SNORD97   | -0.096497066 | -1.742395944 | 0.082390967 | 0.18316585  | no |
| ALMS1P    | -0.096477058 | -1.742031267 | 0.082454859 | 0.183288931 | no |
| PRKG1     | 0.096459482  | 1.741710936  | 0.082511016 | 0.183394791 | no |
| POLDIP2   | -0.096436229 | -1.741287128 | 0.08258536  | 0.183541052 | no |
| PPIF      | -0.096431483 | -1.741200618 | 0.082600542 | 0.183555811 | no |
| C5orf4    | -0.096409727 | -1.740804094 | 0.08267016  | 0.183691523 | no |
| IQSEC2    | -0.096402465 | -1.740671744 | 0.082693408 | 0.183724183 | no |
| TIMM10    | -0.096384808 | -1.740349944 | 0.082749954 | 0.183830812 | no |
| SLC47A1   | 0.096379112  | 1.740246129  | 0.082768203 | 0.183852347 | no |
| LINC00638 | 0.096375597  | 1.740182056  | 0.082779468 | 0.183858366 | no |
| TMEM151A  | -0.096346332 | -1.739648689 | 0.082873288 | 0.184047725 | no |
| VWA8      | -0.096333477 | -1.739414401 | 0.082914527 | 0.184120283 | no |
| HIST1H4G  | -0.096330786 | -1.739365358 | 0.082923162 | 0.184120432 | no |
| FOXO1     | 0.096326471  | 1.739286714  | 0.082937009 | 0.184132155 | no |
| APPL1     | -0.096282157 | -1.73847909  | 0.083079325 | 0.184429064 | no |
| MFI2      | 0.0962673    | 1.738208312  | 0.083127085 | 0.184516027 | no |
| BET1L     | 0.096260801  | 1.738089869  | 0.083147983 | 0.184528212 | no |
| AP4B1     | 0.096260252  | 1.738079872  | 0.083149747 | 0.184528212 | no |
| SMYD3     | -0.096238348 | -1.737680681 | 0.083220212 | 0.184665522 | no |
| NMBR      | -0.096225333 | -1.737443481 | 0.083262106 | 0.184731983 | no |
| RDH16     | -0.096223703 | -1.73741377  | 0.083267355 | 0.184731983 | no |
| SUPV3L1   | -0.096109298 | -1.735328815 | 0.083636353 | 0.185531468 | no |
| HCRTR1    | -0.096102065 | -1.735196991 | 0.083659728 | 0.185564167 | no |

|              |              |              |             |             |    |
|--------------|--------------|--------------|-------------|-------------|----|
| USP20        | -0.096094205 | -1.735053745 | 0.083685134 | 0.185601364 | no |
| C1orf216     | -0.096074159 | -1.734688426 | 0.083749956 | 0.185725963 | no |
| LINC00635    | 0.096069616  | 1.734605634  | 0.083764653 | 0.185739388 | no |
| SNORA11      | -0.096065906 | -1.734538023 | 0.083776656 | 0.185746839 | no |
| PLAG1        | 0.096054463  | 1.734329494  | 0.083813685 | 0.185809769 | no |
| SLC35G5      | -0.096044151 | -1.734141572 | 0.083847066 | 0.185864601 | no |
| KLHL30       | 0.096038366  | 1.734036145  | 0.083865799 | 0.185886951 | no |
| KLK7         | -0.096033463 | -1.733946802 | 0.083881676 | 0.185902969 | no |
| KRT31        | -0.096021378 | -1.73372657  | 0.083920823 | 0.185970552 | no |
| TMEM177      | -0.09601261  | -1.733566784 | 0.083949236 | 0.186005431 | no |
| GLRA1        | -0.09601118  | -1.733540709 | 0.083953873 | 0.186005431 | no |
| ADAP1        | -0.095997828 | -1.733297389 | 0.083997156 | 0.186082143 | no |
| OR2M3        | -0.095977457 | -1.73292617  | 0.084063225 | 0.186209314 | no |
| EIF2AK3      | 0.095936416  | 1.732178269  | 0.084196464 | 0.186485231 | no |
| LOC642846    | -0.095928999 | -1.7320431   | 0.084220562 | 0.186519384 | no |
| FRMPD2       | -0.095917793 | -1.731838886 | 0.084256981 | 0.186550256 | no |
| PTEN         | 0.095917153  | 1.73182723   | 0.08425906  | 0.186550256 | no |
| ZEB1         | -0.095916695 | -1.73181888  | 0.08426055  | 0.186550256 | no |
| FAM83H       | 0.095914027  | 1.731770256  | 0.084269224 | 0.186550256 | no |
| ATP1A4       | -0.095903433 | -1.731577211 | 0.084303667 | 0.186607282 | no |
| HS3ST5       | -0.095900718 | -1.731527727 | 0.084312497 | 0.186607609 | no |
| SPIN2B       | -0.095892377 | -1.731375737 | 0.084339626 | 0.186648429 | no |
| RASEF        | 0.095825165  | 1.730150938  | 0.084558497 | 0.187113535 | no |
| SPG21        | 0.095791317  | 1.729534154  | 0.08466889  | 0.187338528 | no |
| NDE1         | 0.095782992  | 1.729382445  | 0.084696062 | 0.187379356 | no |
| WFIKKN1      | -0.095774381 | -1.729225536 | 0.084724172 | 0.187422252 | no |
| TICRR        | -0.09577047  | -1.729154274 | 0.084736941 | 0.187431206 | no |
| PAK6         | -0.095755502 | -1.728881509 | 0.08478583  | 0.187520045 | no |
| UBE2D2       | 0.095743396  | 1.728660915  | 0.084825386 | 0.187588224 | no |
| NT5C3L       | -0.095740305 | -1.728604587 | 0.084835488 | 0.187591262 | no |
| C15orf54     | 0.095734906  | 1.728506209  | 0.084853135 | 0.18761098  | no |
| GNRH1        | 0.095725976  | 1.728343486  | 0.084882331 | 0.187656226 | no |
| ILKAP        | -0.095721852 | -1.728268339 | 0.084895817 | 0.187666734 | no |
| FBXO11       | -0.095710028 | -1.728052881 | 0.084934491 | 0.187732917 | no |
| FBXO22       | 0.095704837  | 1.727958287  | 0.084951476 | 0.187751148 | no |
| RBP2         | -0.095683821 | -1.727575333 | 0.085020263 | 0.187878651 | no |
| IRGQ         | -0.095679284 | -1.727492675 | 0.085035116 | 0.187878651 | no |
| CC2D2A       | -0.0956792   | -1.72749113  | 0.085035393 | 0.187878651 | no |
| SLC38A3      | -0.095672268 | -1.727364824 | 0.085058094 | 0.187892773 | no |
| DNAJC8       | 0.095671909  | 1.727358277  | 0.085059271 | 0.187892773 | no |
| SPOCK1       | -0.095657935 | -1.727103655 | 0.085105049 | 0.187974574 | no |
| EPHA7        | -0.09565461  | -1.727043067 | 0.085115945 | 0.18797932  | no |
| CYP11B1      | -0.095620116 | -1.726414526 | 0.085229046 | 0.18820905  | no |
| FAM86EP      | 0.095617545  | 1.726367683  | 0.08523748  | 0.18820905  | no |
| LOC100130275 | -0.095579387 | -1.725672378 | 0.085362747 | 0.188466283 | no |
| KCNA4        | -0.095576551 | -1.725620702 | 0.085372063 | 0.188467489 | no |
| WWTR1-AS1    | 0.095525159  | 1.724684294  | 0.085541019 | 0.188821081 | no |
| SKA2         | -0.095521302 | -1.724614002 | 0.085553713 | 0.188829706 | no |
| PPA2         | 0.095503066  | 1.724281734  | 0.085613736 | 0.188942782 | no |
| G6PD         | 0.095473875  | 1.723749849  | 0.085709892 | 0.189135566 | no |
| MCM10        | -0.09546577  | -1.72360216  | 0.085736607 | 0.189175094 | no |



|              |              |              |             |             |    |
|--------------|--------------|--------------|-------------|-------------|----|
| CPSF6        | -0.095453825 | -1.723384523 | 0.085775987 | 0.189242555 | no |
| FNDC7        | 0.095435502  | 1.723050667  | 0.085836424 | 0.189338232 | no |
| HHATL        | -0.095435336 | -1.723047636 | 0.085836973 | 0.189338232 | no |
| TMEM55B      | -0.095425901 | -1.722875736 | 0.085868106 | 0.189387465 | no |
| SLC24A4      | -0.095419471 | -1.722758576 | 0.08588933  | 0.189399855 | no |
| TRIM32       | -0.095418859 | -1.722747429 | 0.085891349 | 0.189399855 | no |
| FDX1L        | -0.09541353  | -1.722650318 | 0.085908945 | 0.18941922  | no |
| TRNP1        | -0.095408212 | -1.722553435 | 0.085926502 | 0.189434588 | no |
| SMAD5        | -0.09540608  | -1.722514578 | 0.085933544 | 0.189434588 | no |
| HAVCR1P1     | -0.095383572 | -1.722104479 | 0.0860079   | 0.189579054 | no |
| ICT1         | -0.095367968 | -1.72182018  | 0.086059477 | 0.189673287 | no |
| AQP4         | -0.09535871  | -1.721651497 | 0.086090091 | 0.189721303 | no |
| LRRN4        | -0.09535344  | -1.72155547  | 0.086107523 | 0.189737632 | no |
| STYX         | 0.095351132  | 1.721513415  | 0.086115158 | 0.189737632 | no |
| DCUN1D1      | -0.095342572 | -1.721357445 | 0.086143479 | 0.189780576 | no |
| BCL2L15      | -0.095337674 | -1.72126821  | 0.086159686 | 0.189796824 | no |
| GNA11        | -0.095331101 | -1.721148456 | 0.08618144  | 0.189825287 | no |
| PARD6A       | -0.095316437 | -1.72088127  | 0.086229991 | 0.189903459 | no |
| MAGEA10      | 0.09531419   | 1.720840332  | 0.086237432 | 0.189903459 | no |
| SLC27A1      | 0.095311368  | 1.720788915  | 0.086246778 | 0.189903459 | no |
| LYPD3        | 0.095309708  | 1.720758673  | 0.086252276 | 0.189903459 | no |
| PNMA6A       | -0.095293149 | -1.720456963 | 0.086307139 | 0.190004786 | no |
| ADCY4        | 0.095267521  | 1.719990038  | 0.0863921   | 0.190172347 | no |
| MSX2         | -0.095252882 | -1.71972331  | 0.086440664 | 0.190259762 | no |
| SCT          | -0.095242548 | -1.719535028 | 0.086474959 | 0.190315754 | no |
| COMMD10      | 0.095234938  | 1.719396385  | 0.086500219 | 0.190351853 | no |
| TTC23        | 0.095190676  | 1.718589955  | 0.086647265 | 0.19065592  | no |
| WWP1         | 0.095176325  | 1.718328496  | 0.086694983 | 0.190741389 | no |
| FKRP         | 0.095166971  | 1.718158072  | 0.086726099 | 0.190790315 | no |
| BTBD9        | -0.0951571   | -1.717978225 | 0.086758944 | 0.190843037 | no |
| LOC100129427 | -0.095151508 | -1.717876341 | 0.086777556 | 0.190864441 | no |
| EMC8         | 0.095146687  | 1.717788519  | 0.086793601 | 0.190880197 | no |
| LPAR1        | 0.095108104  | 1.717085569  | 0.08692212  | 0.191130257 | no |
| SLC22A9      | -0.095107212 | -1.717069328 | 0.086925091 | 0.191130257 | no |
| C2orf27B     | -0.095098628 | -1.716912938 | 0.086953705 | 0.191169567 | no |
| AASS         | -0.095096512 | -1.716874388 | 0.08696076  | 0.191169567 | no |
| HTR2C        | -0.095085978 | -1.716682458 | 0.086995889 | 0.191227233 | no |
| C11orf87     | -0.095080917 | -1.716590264 | 0.087012768 | 0.191244773 | no |
| ZNF672       | 0.095075841  | 1.716497785  | 0.087029701 | 0.191262431 | no |
| MORN3        | 0.095036077  | 1.715773332  | 0.087162446 | 0.191534573 | no |
| GOLGA6L6     | -0.095023156 | -1.715537942 | 0.087205612 | 0.191609837 | no |
| LOR          | -0.095004973 | -1.715206672 | 0.087266391 | 0.19172378  | no |
| LOC100132287 | -0.094991112 | -1.714954149 | 0.087312746 | 0.191806012 | no |
| DTNBP1       | 0.094974613  | 1.714653568  | 0.087367948 | 0.191907662 | no |
| KIAA1456     | -0.094954097 | -1.714279807 | 0.087436628 | 0.192038894 | no |
| ALOXE3       | -0.094943349 | -1.714083993 | 0.087472628 | 0.192098329 | no |
| SEC24B-AS1   | -0.094911975 | -1.713512437 | 0.087577775 | 0.192309589 | no |
| FBX031       | -0.094904592 | -1.713377934 | 0.087602533 | 0.192344303 | no |
| LINC00311    | -0.094873378 | -1.712809275 | 0.087707273 | 0.192551482 | no |
| NPAT         | -0.094871132 | -1.712768367 | 0.087714811 | 0.192551482 | no |
| TACR3        | -0.094867757 | -1.712706876 | 0.087726144 | 0.19255669  | no |

|              |              |              |             |             |    |
|--------------|--------------|--------------|-------------|-------------|----|
| PIAS4        | -0.094854642 | -1.712467965 | 0.087770186 | 0.192633687 | no |
| LINGO2       | -0.094845252 | -1.712296887 | 0.087801734 | 0.192658578 | no |
| MED15        | 0.094844002  | 1.712274128  | 0.087805932 | 0.192658578 | no |
| MIP          | -0.094843262 | -1.712260635 | 0.087808421 | 0.192658578 | no |
| LOC100505865 | 0.094833564  | 1.712083964  | 0.087841012 | 0.192710412 | no |
| RECQL4       | -0.094823218 | -1.711895495 | 0.087875791 | 0.192767033 | no |
| FMNL3        | 0.094782907  | 1.711161132  | 0.088011412 | 0.19304483  | no |
| ANKRD53      | 0.094768856  | 1.710905172  | 0.088058722 | 0.193128889 | no |
| CSNK1A1      | 0.094762532  | 1.710789956  | 0.088080024 | 0.193155898 | no |
| GRIK3        | -0.094757353 | -1.710695614 | 0.08809747  | 0.193174445 | no |
| SERTAD2      | 0.094747413  | 1.710514537  | 0.088130964 | 0.193228172 | no |
| MSTO2P       | -0.094730767 | -1.710211306 | 0.088187075 | 0.193331473 | no |
| CNTRL        | 0.094721328  | 1.710039353  | 0.088218907 | 0.193369142 | no |
| RPL23AP64    | -0.094720336 | -1.710021279 | 0.088222253 | 0.193369142 | no |
| SETD3        | -0.094716954 | -1.709959684 | 0.088233658 | 0.193374418 | no |
| MUCL1        | 0.094697857  | 1.709611788  | 0.088298097 | 0.193495912 | no |
| MUC12        | 0.094686242  | 1.709400208  | 0.088337306 | 0.193562097 | no |
| CCDC116      | -0.094682225 | -1.709327029 | 0.08835087  | 0.193570297 | no |
| DRD2         | -0.094679799 | -1.709282837 | 0.088359063 | 0.193570297 | no |
| SERPINF2     | 0.094669483  | 1.709094914  | 0.088393906 | 0.193626892 | no |
| AFAP1L1      | 0.094657112  | 1.708869549  | 0.088435707 | 0.193698713 | no |
| TUSC1        | 0.094639489  | 1.70854853   | 0.088495277 | 0.193809436 | no |
| C14orf182    | 0.094619347  | 1.708181605  | 0.088563405 | 0.193921452 | no |
| MEF2B        | 0.094619031  | 1.708175865  | 0.088564471 | 0.193921452 | no |
| CACNG6       | -0.094595835 | -1.707753307 | 0.088642982 | 0.194073587 | no |
| LINC00381    | -0.094591378 | -1.707672131 | 0.088658071 | 0.19408685  | no |
| PDCD2L       | -0.094542169 | -1.70677573  | 0.088824832 | 0.194432111 | no |
| KCTD3        | -0.094533865 | -1.706624463 | 0.088852998 | 0.19445878  | no |
| FLJ31662     | -0.094533241 | -1.706613106 | 0.088855113 | 0.19445878  | no |
| LOC285972    | -0.094530504 | -1.706563239 | 0.088864399 | 0.194459302 | no |
| ANKRD29      | -0.094516508 | -1.706308298 | 0.088911891 | 0.194543417 | no |
| STARD8       | 0.094511569  | 1.706218325  | 0.088928656 | 0.194560292 | no |
| SSBP4        | 0.094504293  | 1.706085788  | 0.088953357 | 0.194594523 | no |
| LOC645434    | -0.09449676  | -1.705948578 | 0.088978935 | 0.194630666 | no |
| NBPF24       | -0.094492563 | -1.705872121 | 0.08899319  | 0.194642037 | no |
| FAM63A       | -0.094472215 | -1.705501466 | 0.089062325 | 0.194773422 | no |
| NMUR1        | 0.094444964  | 1.705005089  | 0.089154977 | 0.194956207 | no |
| TDRD6        | -0.094439998 | -1.704914632 | 0.08917187  | 0.194973308 | no |
| ECH1         | -0.094434902 | -1.704821795 | 0.08918921  | 0.194991384 | no |
| C1D          | -0.094420831 | -1.70456549  | 0.089237096 | 0.195076231 | no |
| ZNF763       | -0.09439862  | -1.704160919 | 0.089312726 | 0.195221703 | no |
| CNTLN        | 0.094380074  | 1.703823098  | 0.089375917 | 0.195338246 | no |
| SLC6A4       | -0.094377637 | -1.703778716 | 0.089384222 | 0.195338246 | no |
| CHRM3        | -0.094373579 | -1.703704795 | 0.089398055 | 0.195348612 | no |
| C5orf63      | 0.09436996   | 1.703638869  | 0.089410394 | 0.19535571  | no |
| SMIM12       | 0.094348383  | 1.703245851  | 0.089483978 | 0.195496613 | no |
| DDX1         | -0.094318828 | -1.702707515 | 0.089584851 | 0.195697095 | no |
| IDH3A        | -0.094304678 | -1.702449776 | 0.089633178 | 0.195782765 | no |
| ENTPD3       | -0.094301542 | -1.702392644 | 0.089643893 | 0.195786271 | no |
| CNTF         | 0.094286921  | 1.702126343  | 0.089693852 | 0.195875478 | no |
| CRYBA4       | 0.094270045  | 1.70181895   | 0.089751549 | 0.195979733 | no |

|              |              |              |             |             |    |
|--------------|--------------|--------------|-------------|-------------|----|
| VAMP1        | -0.094261825 | -1.701669233 | 0.089779661 | 0.195979733 | no |
| LEFTY1       | -0.094261484 | -1.701663017 | 0.089780829 | 0.195979733 | no |
| LOC100130000 | -0.09426048  | -1.701644728 | 0.089784263 | 0.195979733 | no |
| MDP1         | -0.094259625 | -1.701629155 | 0.089787188 | 0.195979733 | no |
| CENPH        | -0.094237311 | -1.701222724 | 0.089863544 | 0.196126478 | no |
| GSTA7P       | 0.09422192   | 1.700942383  | 0.089916243 | 0.196221565 | no |
| LOC574538    | -0.094204955 | -1.700633381 | 0.089974357 | 0.196328451 | no |
| TPTE2        | -0.094201558 | -1.700571511 | 0.089985997 | 0.196333915 | no |
| ZBTB37       | -0.09419661  | -1.700481383 | 0.090002955 | 0.196350981 | no |
| COL22A1      | 0.094178991  | 1.700160461  | 0.09006336  | 0.196462816 | no |
| RUFY4        | 0.094139467  | 1.69944058   | 0.090198976 | 0.196738678 | no |
| ZNF92        | -0.094128037 | -1.699232395 | 0.090238226 | 0.196804315 | no |
| RMI1         | -0.094121283 | -1.69910939  | 0.090261424 | 0.196834932 | no |
| ENPP5        | 0.094072003  | 1.698211812  | 0.090430842 | 0.197157266 | no |
| GNB2         | 0.094071715  | 1.698206578  | 0.09043183  | 0.197157266 | no |
| KIAA1462     | -0.094070283 | -1.698180502 | 0.090436756 | 0.197157266 | no |
| HEATR1       | 0.09406705   | 1.698121609  | 0.090447882 | 0.19716152  | no |
| TAF6L        | -0.094062386 | -1.698036653 | 0.090463933 | 0.19717651  | no |
| MS4A8B       | -0.094058394 | -1.697963955 | 0.09047767  | 0.197181692 | no |
| SLC9A6       | -0.094056363 | -1.697926962 | 0.090484661 | 0.197181692 | no |
| ORMDL1       | 0.094024427  | 1.697345301  | 0.09059464  | 0.19738918  | no |
| BRD7P3       | -0.094023381 | -1.697326246 | 0.090598245 | 0.19738918  | no |
| DNA2         | -0.094008829 | -1.697061212 | 0.090648394 | 0.197478422 | no |
| EID1         | -0.094006082 | -1.697011177 | 0.090657864 | 0.197479034 | no |
| EPB41        | -0.094001443 | -1.696926691 | 0.090673856 | 0.197493853 | no |
| CPNE7        | -0.093972381 | -1.696397382 | 0.090774101 | 0.197677746 | no |
| EGR1         | 0.093971633  | 1.69638376   | 0.090776682 | 0.197677746 | no |
| GRTP1        | 0.093946428  | 1.695924711  | 0.090863695 | 0.19784718  | no |
| NDST3        | -0.093931214 | -1.69564762  | 0.09091625  | 0.197941559 | no |
| BASP1P1      | 0.093909491  | 1.695251979  | 0.090991333 | 0.198084962 | no |
| FAM219A      | -0.093901749 | -1.695110976 | 0.091018104 | 0.198123172 | no |
| ACSL6        | -0.093885659 | -1.69481794  | 0.091073761 | 0.198204597 | no |
| MAGEB1       | 0.093885602  | 1.694816912  | 0.091073956 | 0.198204597 | no |
| SEC61A2      | -0.093854387 | -1.69424841  | 0.091182011 | 0.198419664 | no |
| NDFIP1       | -0.09383935  | -1.693974554 | 0.0912341   | 0.198512912 | no |
| RIT1         | 0.093828076  | 1.693769222  | 0.09127317  | 0.198576012 | no |
| LINC00598    | 0.093820925  | 1.693638989  | 0.091297958 | 0.198576012 | no |
| PCNX         | -0.093820407 | -1.693629563 | 0.091299752 | 0.198576012 | no |
| SLC01C1      | -0.093820319 | -1.69362795  | 0.09130006  | 0.198576012 | no |
| GPAM         | -0.093812657 | -1.693488407 | 0.091326626 | 0.198613693 | no |
| ERCC6        | -0.09379608  | -1.693186506 | 0.091384124 | 0.198718628 | no |
| ZNF391       | -0.093781154 | -1.692914685 | 0.091435918 | 0.19881114  | no |
| RAB7A        | 0.093772386  | 1.692754997  | 0.091466356 | 0.198856059 | no |
| OPRL1        | 0.093769873  | 1.692709224  | 0.091475083 | 0.198856059 | no |
| PRKAB1       | 0.093766711  | 1.692651647  | 0.09148606  | 0.198859808 | no |
| LOC285758    | -0.093757668 | -1.692486953 | 0.091517467 | 0.198907958 | no |
| EFHD1        | -0.093753254 | -1.692406577 | 0.091532798 | 0.198921161 | no |
| ECD          | -0.093738977 | -1.692146559 | 0.091582408 | 0.19900885  | no |
| DNAJB12      | -0.093700273 | -1.691441696 | 0.091716999 | 0.199267764 | no |
| CALD1        | 0.093699381  | 1.691425455  | 0.091720102 | 0.199267764 | no |
| UBA1         | -0.093682107 | -1.691110865 | 0.091780226 | 0.19937823  | no |

|             |              |              |             |             |    |
|-------------|--------------|--------------|-------------|-------------|----|
| MKL2        | 0.093675618  | 1.69099269   | 0.091802819 | 0.199407155 | no |
| PPP1R3C     | -0.093641666 | -1.690374391 | 0.091921103 | 0.199643902 | no |
| FOXN4       | -0.093628626 | -1.690136906 | 0.091966567 | 0.199717398 | no |
| SFTA3       | -0.09362663  | -1.690100556 | 0.091973528 | 0.199717398 | no |
| LOC339505   | 0.093606461  | 1.689733268  | 0.092043882 | 0.199849977 | no |
| ACTL8       | 0.093589897  | 1.689431615  | 0.092101697 | 0.199955305 | no |
| LINC00092   | 0.093571734  | 1.689100852  | 0.092165124 | 0.200052968 | no |
| RPL23AP53   | -0.093571684 | -1.689099941 | 0.092165299 | 0.200052968 | no |
| SKI         | 0.093563351  | 1.688948183  | 0.092194412 | 0.200095951 | no |
| KRIT1       | -0.0935433   | -1.688583053 | 0.092264488 | 0.200227821 | no |
| CCDC141     | -0.093540382 | -1.688529907 | 0.092274692 | 0.200229745 | no |
| EIF4EBP3    | 0.093508747  | 1.687953813  | 0.092385354 | 0.200439039 | no |
| DEPDC4      | -0.093507478 | -1.687930697 | 0.092389797 | 0.200439039 | no |
| KIAA1468    | -0.093499728 | -1.687789564 | 0.092416924 | 0.200477654 | no |
| NEDD4       | 0.093486382  | 1.687546534  | 0.092463653 | 0.200558777 | no |
| GP9         | -0.093474412 | -1.687328553 | 0.092505582 | 0.200629474 | no |
| PPBP        | 0.093469379  | 1.687236903  | 0.092523215 | 0.200644776 | no |
| MCM5        | 0.093467069  | 1.687194837  | 0.09253131  | 0.200644776 | no |
| STARD4      | 0.093453967  | 1.686956254  | 0.092577229 | 0.200724095 | no |
| GPAT2       | 0.093442475  | 1.686746969  | 0.092617525 | 0.200791205 | no |
| ASNS        | -0.09343374  | -1.686587905 | 0.09264816  | 0.200837362 | no |
| CNP         | -0.09342266  | -1.686386149 | 0.09268703  | 0.200901357 | no |
| CLPTM1      | -0.093376688 | -1.685549003 | 0.092848452 | 0.201230949 | no |
| ACTR8       | -0.093363918 | -1.685316463 | 0.092893332 | 0.201307916 | no |
| SLC7A11-AS1 | -0.093316389 | -1.684450969 | 0.093060525 | 0.201649902 | no |
| WASH2P      | -0.093297369 | -1.68410463  | 0.093127497 | 0.201774678 | no |
| TMEM190     | 0.093293038  | 1.684025764  | 0.093142753 | 0.201787389 | no |
| STEAP1B     | 0.093276346  | 1.683721806  | 0.093201569 | 0.201894459 | no |
| TIMP2       | 0.093269869  | 1.683603874  | 0.093224397 | 0.201923556 | no |
| INO80D      | -0.093232955 | -1.682931699 | 0.093354597 | 0.20218519  | no |
| ARHGEF10    | 0.093220992  | 1.68271385   | 0.093396826 | 0.202256266 | no |
| CUL2        | -0.093188133 | -1.682115538 | 0.093512884 | 0.202486913 | no |
| RUNDC1      | -0.093185504 | -1.682067655 | 0.093522177 | 0.202486913 | no |
| PRKD1       | -0.093163669 | -1.681670076 | 0.093599368 | 0.202633627 | no |
| CLSTN3      | -0.093153284 | -1.681480979 | 0.0936361   | 0.202671569 | no |
| ZNF232      | -0.093149072 | -1.68140427  | 0.093651003 | 0.202671569 | no |
| GPR158-AS1  | -0.09314639  | -1.681355446 | 0.093660491 | 0.202671569 | no |
| CCL1        | -0.093145823 | -1.681345111 | 0.093662499 | 0.202671569 | no |
| SREK1IP1    | -0.093145385 | -1.681337146 | 0.093664047 | 0.202671569 | no |
| ZNF268      | 0.09313918   | 1.681224147  | 0.093686007 | 0.202698679 | no |
| UBL4A       | 0.093121709  | 1.680906028  | 0.093747854 | 0.202812073 | no |
| F2R         | 0.093115903  | 1.680800321  | 0.093768412 | 0.20283613  | no |
| MAU2        | -0.093098684 | -1.680486786 | 0.093829411 | 0.202947652 | no |
| BRAF        | -0.093090943 | -1.68034583  | 0.093856845 | 0.202969437 | no |
| DBT         | -0.093090512 | -1.680337983 | 0.093858372 | 0.202969437 | no |
| WWP2        | 0.093087757  | 1.680287823  | 0.093868136 | 0.202970129 | no |
| FAT1        | -0.093084878 | -1.680235391 | 0.093878343 | 0.202971778 | no |
| FAM213B     | -0.093081585 | -1.680175445 | 0.093890014 | 0.202976591 | no |
| LRRC6       | 0.093052047  | 1.679637604  | 0.093994781 | 0.203164011 | no |
| NEK4        | -0.093051812 | -1.679633324 | 0.093995615 | 0.203164011 | no |
| DPH2        | 0.093028873  | 1.679215651  | 0.094077039 | 0.203319554 | no |

|              |              |              |             |             |    |
|--------------|--------------|--------------|-------------|-------------|----|
| MTHFD2       | -0.093013252 | -1.678931216 | 0.094132522 | 0.203396804 | no |
| POLG2        | -0.09301153  | -1.678899863 | 0.094138639 | 0.203396804 | no |
| KCNA7        | -0.093010816 | -1.678886862 | 0.094141176 | 0.203396804 | no |
| POLR3D       | -0.093004745 | -1.678776328 | 0.094162746 | 0.203422956 | no |
| KANK2        | 0.092998758  | 1.678667321  | 0.094184021 | 0.203448467 | no |
| LINC00340    | 0.092989827  | 1.678504704  | 0.094215767 | 0.203496589 | no |
| MT1JP        | 0.092970368  | 1.678150391  | 0.094284966 | 0.203624716 | no |
| APOBEC2      | -0.092967818 | -1.678103958 | 0.094294038 | 0.203624716 | no |
| LOC100287632 | -0.09296242  | -1.678005681 | 0.094313241 | 0.203645721 | no |
| FAM189A1     | -0.092917713 | -1.67719168  | 0.094472413 | 0.203968919 | no |
| PPP3CC       | 0.092901336  | 1.676893491  | 0.094530776 | 0.204074425 | no |
| RUNX1-IT1    | 0.092891982  | 1.676723172  | 0.094564124 | 0.204125913 | no |
| MAP6D1       | -0.09287412  | -1.67639795  | 0.094627829 | 0.204242912 | no |
| HIST1H3D     | 0.092865386  | 1.676238937  | 0.094658989 | 0.204272501 | no |
| DEDD         | -0.092864949 | -1.676230984 | 0.094660548 | 0.204272501 | no |
| GPR153       | -0.092848864 | -1.675938111 | 0.094717962 | 0.204375875 | no |
| ADCK3        | 0.092838072  | 1.675741623  | 0.094756496 | 0.204438497 | no |
| GART         | -0.092807033 | -1.675176498 | 0.094867398 | 0.204657222 | no |
| TSSK4        | -0.092799015 | -1.67503051  | 0.094896063 | 0.204698514 | no |
| SMIM4        | 0.092784449  | 1.674765314  | 0.094948155 | 0.204775717 | no |
| ROGDI        | -0.092783678 | -1.674751286 | 0.094950911 | 0.204775717 | no |
| WDR47        | -0.092751288 | -1.674161558 | 0.095066833 | 0.205005149 | no |
| LIPC         | 0.092745037  | 1.674047753  | 0.095089217 | 0.205032844 | no |
| RAB24        | -0.092729152 | -1.673758544 | 0.095146119 | 0.205134956 | no |
| LY6G5B       | -0.092721583 | -1.673620733 | 0.095173243 | 0.205172852 | no |
| CLUL1        | 0.09271224   | 1.673450641  | 0.095206729 | 0.205224455 | no |
| DNAJC11      | -0.092699667 | -1.673221722 | 0.095251811 | 0.205301041 | no |
| BPIFB6       | -0.092692069 | -1.673083386 | 0.095279063 | 0.205339185 | no |
| GPR63        | -0.092687058 | -1.672992166 | 0.095297037 | 0.205357326 | no |
| AXIN1        | -0.092678261 | -1.672832    | 0.095328602 | 0.20540475  | no |
| MFI2-AS1     | -0.092673551 | -1.672746242 | 0.095345506 | 0.205420578 | no |
| RAB40AL      | -0.092631704 | -1.671984371 | 0.095495788 | 0.205720168 | no |
| EGR3         | 0.092629501  | 1.671944265  | 0.095503705 | 0.205720168 | no |
| C2orf48      | -0.092623818 | -1.671840805 | 0.095524129 | 0.205743541 | no |
| VPS37A       | 0.092620697  | 1.671783991  | 0.095535346 | 0.205747081 | no |
| ATP5C1       | -0.092594271 | -1.671302878 | 0.095630378 | 0.205920905 | no |
| ADAMTS7      | 0.092592925  | 1.671278364  | 0.095635222 | 0.205920905 | no |
| SMAD2        | 0.092568467  | 1.670833092  | 0.095723245 | 0.206076463 | no |
| PPIL2        | -0.092567523 | -1.670815899 | 0.095726645 | 0.206076463 | no |
| BRCA2        | 0.092540671  | 1.670327042  | 0.095823362 | 0.206264011 | no |
| FAM86HP      | 0.09252728   | 1.670083259  | 0.095871623 | 0.206347225 | no |
| TMEM231      | -0.092515005 | -1.669859784 | 0.09591588  | 0.206421808 | no |
| CENPO        | -0.092506973 | -1.669713564 | 0.095944846 | 0.206463472 | no |
| KLF13        | -0.092503142 | -1.669643809 | 0.095958668 | 0.20647254  | no |
| TPTEP1       | -0.092494049 | -1.669478271 | 0.095991473 | 0.20652245  | no |
| PLXNA4       | -0.09248999  | -1.669404385 | 0.096006119 | 0.206533283 | no |
| SRMS         | -0.092476548 | -1.669159668 | 0.096054638 | 0.206616978 | no |
| TJAP1        | -0.092437229 | -1.668443862 | 0.096196673 | 0.206901791 | no |
| NACAD        | -0.0924282   | -1.668279492 | 0.096229312 | 0.20695128  | no |
| TMEM213      | -0.092384078 | -1.667476255 | 0.096388939 | 0.207273834 | no |
| KRT80        | 0.092375184  | 1.667314332  | 0.096421144 | 0.207322342 | no |

|              |              |              |             |             |    |
|--------------|--------------|--------------|-------------|-------------|----|
| RPL23        | -0.092358902 | -1.667017927 | 0.096480118 | 0.207428394 | no |
| OACYLP       | 0.092351334  | 1.666880147  | 0.096507542 | 0.207466598 | no |
| BRICD5       | -0.092339978 | -1.666673416 | 0.096548701 | 0.207534319 | no |
| EXPH5        | -0.092325234 | -1.66640502  | 0.096602158 | 0.20762846  | no |
| KIAA1609     | 0.09232072   | 1.666322831  | 0.096618532 | 0.207642887 | no |
| LOC339442    | 0.092317315  | 1.666260853  | 0.096630881 | 0.207648662 | no |
| ARID3C       | -0.092297493 | -1.665900004 | 0.096702807 | 0.207782446 | no |
| RAB35        | 0.092290979  | 1.665781426  | 0.096726452 | 0.207812474 | no |
| LOC100506085 | -0.092283983 | -1.665654075 | 0.096751851 | 0.207846265 | no |
| ARPC3        | 0.092278722  | 1.665558287  | 0.096770959 | 0.207866534 | no |
| ELF2         | -0.092224051 | -1.664563052 | 0.096969668 | 0.20827255  | no |
| TBX6         | -0.092192553 | -1.663989673 | 0.097084298 | 0.208497916 | no |
| RHO          | -0.092168243 | -1.663547142 | 0.097172843 | 0.208667223 | no |
| UXT          | -0.092147047 | -1.663161298 | 0.097250099 | 0.208801528 | no |
| C9orf78      | -0.092145753 | -1.663137737 | 0.097254818 | 0.208801528 | no |
| LOC283663    | 0.092142466  | 1.663077909  | 0.097266802 | 0.208806397 | no |
| KLHL1        | -0.092138962 | -1.663014113 | 0.097279582 | 0.208812974 | no |
| GAB1         | -0.092135049 | -1.662942887 | 0.097293852 | 0.208822748 | no |
| FAM13A-AS1   | -0.09207546  | -1.661858174 | 0.097511382 | 0.209268734 | no |
| CBWD3        | 0.092041435  | 1.661238818  | 0.097635763 | 0.209514747 | no |
| RBM11        | -0.092037402 | -1.661165399 | 0.097650516 | 0.209525483 | no |
| SCARNA21     | -0.092005315 | -1.660581328 | 0.097767942 | 0.209736994 | no |
| TFAP2A       | -0.092005133 | -1.660578007 | 0.09776861  | 0.209736994 | no |
| USF2         | 0.091998134  | 1.660450605  | 0.097794239 | 0.209771035 | no |
| TAF7         | -0.091986558 | -1.660239895 | 0.097836639 | 0.209841039 | no |
| FLT1         | 0.091962116  | 1.659794973  | 0.097926217 | 0.210012206 | no |
| ACSM5        | 0.09191642   | 1.658963194  | 0.098093857 | 0.210350737 | no |
| CAPNS2       | 0.091904697  | 1.658749819  | 0.098136899 | 0.210422039 | no |
| SNHG4        | 0.091889144  | 1.658466714  | 0.09819403  | 0.210523533 | no |
| JSRP1        | 0.091885536  | 1.658401037  | 0.098207287 | 0.210530954 | no |
| LINC00673    | -0.091877541 | -1.658255517 | 0.098236667 | 0.210572932 | no |
| CEP85        | -0.091860246 | -1.657940708 | 0.098300249 | 0.210688208 | no |
| LOC728554    | -0.091854065 | -1.657828199 | 0.098322981 | 0.210715914 | no |
| ACOX1        | 0.091841252  | 1.657594977  | 0.098370115 | 0.210795906 | no |
| RBM20        | 0.091829969  | 1.657389605  | 0.098411636 | 0.210863855 | no |
| POLE3        | -0.09182199  | -1.657244368 | 0.098441007 | 0.210905761 | no |
| AARS2        | -0.091802488 | -1.656889399 | 0.098512823 | 0.211038584 | no |
| BAG5         | -0.091776287 | -1.656412491 | 0.098609375 | 0.211224367 | no |
| C15orf62     | -0.091762939 | -1.65616953  | 0.098658592 | 0.211300443 | no |
| RAB5B        | -0.091760522 | -1.656125552 | 0.098667503 | 0.211300443 | no |
| CCDC65       | 0.091758656  | 1.656091581  | 0.098674387 | 0.211300443 | no |
| PPM1B        | -0.091752383 | -1.655977397 | 0.098697527 | 0.211328938 | no |
| SYTL5        | -0.091698077 | -1.654988959 | 0.098898025 | 0.211737145 | no |
| TFAP2C       | 0.091668293  | 1.654446842  | 0.099008129 | 0.211951757 | no |
| LPA          | -0.091650989 | -1.654131905 | 0.099072137 | 0.212067659 | no |
| DIRC2        | -0.091636961 | -1.653876578 | 0.099124055 | 0.212157659 | no |
| CXorf22      | 0.091629572  | 1.653742096  | 0.099151409 | 0.212195073 | no |
| P2RX2        | 0.091624325  | 1.653646589  | 0.099170839 | 0.212196894 | no |
| TMEM221      | 0.09162401   | 1.653640848  | 0.099172007 | 0.212196894 | no |
| MRPS9        | -0.091615926 | -1.653493725 | 0.099201944 | 0.21222233  | no |
| CXCR2        | 0.091615467  | 1.653485368  | 0.099203645 | 0.21222233  | no |

|              |              |              |             |             |    |
|--------------|--------------|--------------|-------------|-------------|----|
| C6orf211     | 0.091608063  | 1.653350608  | 0.099231073 | 0.212259878 | no |
| RINT1        | 0.091602209  | 1.653244064  | 0.099252762 | 0.212285143 | no |
| BLCAP        | -0.091597648 | -1.653161051 | 0.099269665 | 0.212300165 | no |
| NT5C2        | -0.091588748 | -1.652999055 | 0.099302655 | 0.212347951 | no |
| KRTAP19-7    | -0.091584904 | -1.652929102 | 0.099316903 | 0.212347951 | no |
| SENP2        | -0.091583624 | -1.652905792 | 0.099321651 | 0.212347951 | no |
| TRPS1        | 0.091579665  | 1.652833747  | 0.099336328 | 0.212350206 | no |
| TIMM44       | -0.09157801  | -1.652803613 | 0.099342467 | 0.212350206 | no |
| CDH3         | 0.091571431  | 1.652683881  | 0.099366864 | 0.21238123  | no |
| ALOX15P1     | -0.0915459   | -1.652219188 | 0.099461595 | 0.212562564 | no |
| CHST5        | -0.09153647  | -1.652047572 | 0.099496599 | 0.212616228 | no |
| CBX2         | -0.091527751 | -1.651888881 | 0.099528975 | 0.212664267 | no |
| CEP104       | 0.091523391  | 1.651809525  | 0.099545168 | 0.212677722 | no |
| STRC         | -0.0915103   | -1.651571253 | 0.099593802 | 0.212760478 | no |
| CYP51A1      | -0.091502546 | -1.651430136 | 0.099622615 | 0.212800877 | no |
| UTP6         | 0.091495826  | 1.651307833  | 0.099647592 | 0.212814354 | no |
| SLC8A3       | -0.09149552  | -1.651302264 | 0.099648729 | 0.212814354 | no |
| HN1L         | 0.091487039  | 1.651147909  | 0.099680259 | 0.212844513 | no |
| LINC00622    | -0.091486394 | -1.651136162 | 0.099682659 | 0.212844513 | no |
| EHMT1        | -0.091481541 | -1.651047847 | 0.099700703 | 0.212856986 | no |
| CD160        | 0.091479496  | 1.651010621  | 0.09970831  | 0.212856986 | no |
| AVIL         | 0.091475582  | 1.650939388  | 0.099722866 | 0.212866917 | no |
| PCNXL4       | -0.091470698 | -1.650850493 | 0.099741035 | 0.212884554 | no |
| AP5B1        | 0.091459018  | 1.650637924  | 0.09978449  | 0.212944184 | no |
| TNNT2        | -0.091457863 | -1.650616897 | 0.099788789 | 0.212944184 | no |
| C21orf128    | -0.091440364 | -1.650298413 | 0.099853928 | 0.213048565 | no |
| C11orf80     | -0.091439396 | -1.650280802 | 0.099857531 | 0.213048565 | no |
| LOC150776    | -0.091405055 | -1.649655795 | 0.099985464 | 0.213300338 | no |
| PSMD14       | 0.091399482  | 1.64955437   | 0.100006237 | 0.21331043  | no |
| FCGR2B       | 0.091398461  | 1.649535777  | 0.100010045 | 0.21331043  | no |
| HIST1H3G     | 0.091392635  | 1.649429758  | 0.100031764 | 0.21333558  | no |
| HECW2        | -0.091378787 | -1.649177728 | 0.100083408 | 0.213424541 | no |
| LOC100129148 | -0.091364938 | -1.648925674 | 0.100135079 | 0.213504328 | no |
| SLC4A9       | -0.091362206 | -1.648875948 | 0.100145275 | 0.213504328 | no |
| LOC220729    | -0.091359324 | -1.648823502 | 0.10015603  | 0.213504328 | no |
| AKAP7        | -0.09135811  | -1.648801406 | 0.100160562 | 0.213504328 | no |
| SYNDIG1L     | -0.091346884 | -1.648597097 | 0.100202469 | 0.213572475 | no |
| ZNF865       | 0.091341028  | 1.648490533  | 0.100224333 | 0.213593943 | no |
| RHOU         | -0.0913364   | -1.648406304 | 0.100241617 | 0.213593943 | no |
| WSCD1        | -0.091336202 | -1.648402693 | 0.100242358 | 0.213593943 | no |
| BCL7C        | 0.091324152  | 1.648183401  | 0.100287368 | 0.213660109 | no |
| TAX1BP3      | 0.091321191  | 1.648129496  | 0.100298435 | 0.213660109 | no |
| UBE2G1       | -0.091319906 | -1.648106113 | 0.100303236 | 0.213660109 | no |
| MBLAC1       | -0.091306707 | -1.64786591  | 0.100352563 | 0.213743998 | no |
| C8orf12      | -0.0912986   | -1.647718366 | 0.100382872 | 0.213787366 | no |
| TSKS         | 0.09129439   | 1.647641744  | 0.100398615 | 0.213796624 | no |
| HMMR         | 0.091292117  | 1.647600374  | 0.100407116 | 0.213796624 | no |
| ARHGAP21     | -0.091285353 | -1.647477278 | 0.100432413 | 0.21381345  | no |
| PHOSPHO1     | -0.091284684 | -1.6474651   | 0.100434916 | 0.21381345  | no |
| STRN         | -0.091281298 | -1.64740348  | 0.100447581 | 0.213819233 | no |
| TRAPPC4      | -0.091276658 | -1.647319041 | 0.100464939 | 0.213835001 | no |

|              |              |              |             |             |    |
|--------------|--------------|--------------|-------------|-------------|----|
| LOC255512    | -0.091267316 | -1.647149025 | 0.100499896 | 0.213888223 | no |
| MADCAM1      | -0.091238387 | -1.646622537 | 0.10060821  | 0.214067123 | no |
| GTF2B        | 0.091237093  | 1.646598994  | 0.100613055 | 0.214067123 | no |
| OR1F1        | -0.091236884 | -1.646595187 | 0.100613839 | 0.214067123 | no |
| LOC283788    | -0.091220291 | -1.646293207 | 0.10067601  | 0.214172507 | no |
| EIF2B5       | -0.091218345 | -1.646257798 | 0.100683302 | 0.214172507 | no |
| TMEM11       | 0.09120309   | 1.645980179  | 0.100740487 | 0.214272942 | no |
| IDH3B        | -0.091163575 | -1.645261042 | 0.100888741 | 0.214567039 | no |
| RDH5         | 0.091153842  | 1.645083921  | 0.100925282 | 0.214623514 | no |
| LOC284344    | -0.091148683 | -1.644990041 | 0.100944654 | 0.214643471 | no |
| LOC81691     | -0.091138749 | -1.644809262 | 0.100981967 | 0.214701567 | no |
| MPHOSPH10    | -0.091134972 | -1.644740523 | 0.100996157 | 0.214710496 | no |
| EFHB         | -0.091128864 | -1.644629358 | 0.101019109 | 0.214738049 | no |
| C2orf194     | -0.091109301 | -1.644273349 | 0.101092643 | 0.214873107 | no |
| GTF3C2       | -0.091087125 | -1.64386978  | 0.101176051 | 0.215029126 | no |
| C1orf226     | 0.091083463  | 1.643803146  | 0.101189829 | 0.215037141 | no |
| LOC100130557 | -0.091048746 | -1.643171364 | 0.101320529 | 0.215279529 | no |
| METAP1       | -0.091046629 | -1.64313283  | 0.101328505 | 0.215279529 | no |
| LTA4H        | 0.091045186  | 1.643106571  | 0.10133394  | 0.215279529 | no |
| DGKE         | -0.091035173 | -1.642924362 | 0.101371664 | 0.215338384 | no |
| C1orf50      | 0.091016139  | 1.642577973  | 0.10144341  | 0.215469492 | no |
| BAHD1        | -0.091003137 | -1.642341363 | 0.101492441 | 0.215531122 | no |
| GALNTL2      | 0.091003125  | 1.642341159  | 0.101492483 | 0.215531122 | no |
| HDAC8        | 0.090997556  | 1.642239806  | 0.101513491 | 0.215554436 | no |
| SMIM1        | 0.090987453  | 1.642055957  | 0.101551609 | 0.21561407  | no |
| GBP7         | 0.090971422  | 1.641764235  | 0.101612114 | 0.215721224 | no |
| GAPDH        | 0.09096278   | 1.641606963  | 0.101644746 | 0.215769186 | no |
| LINC00173    | -0.090952948 | -1.641428038 | 0.101681881 | 0.215826696 | no |
| PTCHD1       | 0.090946493  | 1.641310577  | 0.101706265 | 0.215857133 | no |
| LOC100506013 | 0.09094308   | 1.641248473  | 0.101719159 | 0.215863182 | no |
| PPP1R21      | 0.090922421  | 1.640872541  | 0.101797239 | 0.216007549 | no |
| FANCG        | -0.090912238 | -1.640687238 | 0.101835743 | 0.216058729 | no |
| FGF18        | -0.090910726 | -1.640659708 | 0.101841465 | 0.216058729 | no |
| PCGF3        | -0.090900892 | -1.640480755 | 0.101878663 | 0.21611631  | no |
| PSMB5        | 0.090892448  | 1.640327102  | 0.10191061  | 0.216162744 | no |
| TTF1         | -0.09088937  | -1.640271098 | 0.101922256 | 0.216166112 | no |
| ATAD5        | -0.090879724 | -1.640095566 | 0.101958766 | 0.216222207 | no |
| C19orf80     | -0.090866151 | -1.639848571 | 0.102010158 | 0.216309847 | no |
| AGPS         | 0.090860902  | 1.639753051  | 0.102030038 | 0.216330657 | no |
| C19orf12     | 0.09085822   | 1.639704247  | 0.102040196 | 0.216330853 | no |
| FLJ31485     | -0.090837776 | -1.639332237 | 0.102117656 | 0.216464282 | no |
| BOLA3        | 0.090836293  | 1.639305251  | 0.102123277 | 0.216464282 | no |
| SLC2A6       | 0.090831109  | 1.639210921  | 0.102142927 | 0.21648458  | no |
| SETDB2       | 0.090796931  | 1.638588987  | 0.102272557 | 0.216720274 | no |
| REPS1        | -0.090795821 | -1.638568775 | 0.102276772 | 0.216720274 | no |
| LOC401321    | -0.090793814 | -1.638532265 | 0.102284386 | 0.216720274 | no |
| PCDHA5       | -0.090762829 | -1.637968446 | 0.102402028 | 0.216948144 | no |
| LOC388813    | 0.090747528  | 1.637690015  | 0.102460163 | 0.217049912 | no |
| CCBL2        | 0.090737757  | 1.637512207  | 0.102497302 | 0.217107186 | no |
| FLJ46300     | -0.090730307 | -1.637376653 | 0.102525623 | 0.217145773 | no |
| MRPS22       | -0.090725914 | -1.637296711 | 0.102542327 | 0.217159751 | no |



|              |              |              |             |             |    |
|--------------|--------------|--------------|-------------|-------------|----|
| GPD2         | -0.090712212 | -1.637047392 | 0.10259444  | 0.217248704 | no |
| FAM35DP      | -0.090682533 | -1.636507344 | 0.102707392 | 0.217466459 | no |
| MEGF9        | -0.090677896 | -1.636422958 | 0.102725051 | 0.217482422 | no |
| SH3TC2       | -0.090667592 | -1.636235471 | 0.102764293 | 0.217520262 | no |
| ZNF282       | -0.090666197 | -1.636210097 | 0.102769605 | 0.217520262 | no |
| C4orf27      | -0.09066523  | -1.6361925   | 0.102773288 | 0.217520262 | no |
| SLC7A6OS     | -0.090630897 | -1.635567773 | 0.102904143 | 0.217775769 | no |
| CD38         | -0.0906213   | -1.635393148 | 0.102940743 | 0.21782599  | no |
| KLF5         | 0.090619302  | 1.635356795  | 0.102948364 | 0.21782599  | no |
| CCDC164      | 0.090616703  | 1.635309492  | 0.102958281 | 0.21782599  | no |
| METTL5       | -0.090586755 | -1.634764578 | 0.103072574 | 0.218032427 | no |
| MLF1         | 0.090584915  | 1.634731097  | 0.1030796   | 0.218032427 | no |
| ARHGEF18     | -0.090583163 | -1.63469921  | 0.103086292 | 0.218032427 | no |
| MIR31HG      | 0.090547374  | 1.634048001  | 0.103223028 | 0.218300146 | no |
| SDC4         | 0.090526006  | 1.633659214  | 0.103304731 | 0.218444445 | no |
| TSHR         | -0.090524214 | -1.633626595 | 0.103311588 | 0.218444445 | no |
| RBM22        | -0.09050929  | -1.63335506  | 0.103368685 | 0.21854367  | no |
| YAP1         | 0.090455663  | 1.63237931   | 0.103574068 | 0.218956354 | no |
| RIPPLY1      | 0.090452953  | 1.632329991  | 0.103584457 | 0.218956779 | no |
| HSPB7        | 0.090448266  | 1.632244713  | 0.103602424 | 0.21897322  | no |
| AK3          | 0.090440464  | 1.632102752  | 0.103632339 | 0.218987002 | no |
| C21orf59     | 0.090439219  | 1.632080095  | 0.103637114 | 0.218987002 | no |
| SEC23B       | -0.090438593 | -1.632068708 | 0.103639514 | 0.218987002 | no |
| DPY19L2P4    | -0.090422601 | -1.63177774  | 0.103700853 | 0.219095067 | no |
| SPATA19      | -0.09041142  | -1.631574299 | 0.103743757 | 0.219164169 | no |
| HDX          | -0.090398777 | -1.631344265 | 0.103792287 | 0.219245139 | no |
| MIR210       | 0.090394162  | 1.631260303  | 0.103810005 | 0.219261014 | no |
| LINC00332    | 0.090379352  | 1.630990827  | 0.103866887 | 0.219359598 | no |
| ATG16L1      | -0.090368533 | -1.630793978 | 0.103908454 | 0.219425822 | no |
| MSMB         | -0.090361361 | -1.630663493 | 0.103936015 | 0.219462458 | no |
| MEGF8        | 0.090339018  | 1.630256973  | 0.104021917 | 0.219604406 | no |
| TRPV4        | 0.090336871  | 1.630217916  | 0.104030173 | 0.219604406 | no |
| CCDC43       | -0.090335904 | -1.630200308 | 0.104033896 | 0.219604406 | no |
| PADI2        | 0.090332666  | 1.630141396  | 0.10404635  | 0.219609126 | no |
| MRGPRE       | 0.090327474  | 1.630046941  | 0.104066322 | 0.219629708 | no |
| STAU2-AS1    | -0.09032464  | -1.629995376 | 0.104077226 | 0.219631152 | no |
| ANAPC10      | 0.09027427   | 1.629078924  | 0.104271172 | 0.220018828 | no |
| SCARNA2      | -0.090259198 | -1.628804712 | 0.104329259 | 0.220119783 | no |
| SOX21        | -0.09024818  | -1.628604237 | 0.104371742 | 0.2201878   | no |
| TMSB15B      | -0.090233236 | -1.628332355 | 0.10442938  | 0.220287771 | no |
| ZNF782       | -0.090174668 | -1.62726678  | 0.104655521 | 0.220743135 | no |
| ZNF593       | 0.090167932  | 1.627144222  | 0.104681556 | 0.22075963  | no |
| ERICH1       | 0.090167329  | 1.627133255  | 0.104683886 | 0.22075963  | no |
| C6           | 0.090157185  | 1.626948701  | 0.104723101 | 0.220820659 | no |
| PODN         | -0.090135039 | -1.626545777 | 0.104808757 | 0.220979593 | no |
| GFOD1        | -0.09011259  | -1.626137357 | 0.104895638 | 0.22114108  | no |
| ARSG         | 0.09010937   | 1.626078769  | 0.104908106 | 0.22114567  | no |
| DCUN1D2      | -0.090105493 | -1.626008236 | 0.104923118 | 0.221155622 | no |
| LOC100506421 | -0.090095676 | -1.625829638 | 0.104961136 | 0.221214061 | no |
| TBK1         | 0.090085085  | 1.625636947  | 0.105002167 | 0.221278836 | no |
| GGT1         | 0.090068282  | 1.625331254  | 0.105067286 | 0.221385734 | no |

|              |              |              |             |             |    |
|--------------|--------------|--------------|-------------|-------------|----|
| FAM86B2      | 0.09006668   | 1.625302113  | 0.105073495 | 0.221385734 | no |
| AAMDC        | -0.090055922 | -1.625106397 | 0.105115206 | 0.221451905 | no |
| MARK3        | -0.090043287 | -1.624876517 | 0.105164214 | 0.221533437 | no |
| PSMD8        | 0.090034976  | 1.624725308  | 0.10519646  | 0.221579646 | no |
| RNF144A-AS1  | -0.090016163 | -1.624383058 | 0.105269476 | 0.221710394 | no |
| KAT2B        | -0.090013667 | -1.624337651 | 0.105279167 | 0.221710394 | no |
| PTPRE        | 0.090007337  | 1.62422248   | 0.105303748 | 0.221740433 | no |
| CLIP1        | 0.089986846  | 1.623849692  | 0.105383346 | 0.221886303 | no |
| LOC100505839 | -0.089980002 | -1.623725192 | 0.10540994  | 0.221920555 | no |
| ATP13A5      | -0.089969883 | -1.623541086 | 0.105449276 | 0.221981623 | no |
| IN080C       | -0.089952388 | -1.623222813 | 0.105517306 | 0.222103077 | no |
| GLIPR1L2     | -0.089949232 | -1.623165398 | 0.105529582 | 0.222107163 | no |
| BTBD1        | -0.089942704 | -1.62304664  | 0.105554977 | 0.222138858 | no |
| NKAPP1       | 0.08991807   | 1.622598485  | 0.105650855 | 0.222318861 | no |
| IL1RL1       | 0.089913655  | 1.622518156  | 0.105668048 | 0.22233327  | no |
| ZNF735       | 0.089906879  | 1.622394895  | 0.105694434 | 0.222367017 | no |
| CHADL        | -0.089865273 | -1.62163798  | 0.105856579 | 0.222646046 | no |
| NPR1         | 0.089865105  | 1.621634936  | 0.105857231 | 0.222646046 | no |
| PNPLA3       | -0.089864872 | -1.621630694 | 0.10585814  | 0.222646046 | no |
| FOLH1        | -0.089836337 | -1.621111581 | 0.10596946  | 0.222858367 | no |
| SMG7-AS1     | -0.089833588 | -1.621061575 | 0.105980188 | 0.222859121 | no |
| UBL4B        | 0.089821536  | 1.620842317  | 0.106027237 | 0.222936245 | no |
| RAPH1        | 0.089817357  | 1.620766297  | 0.106043554 | 0.22294874  | no |
| ITGA2B       | -0.08981103  | -1.620651196 | 0.106068263 | 0.222978875 | no |
| HIST1H2B0    | 0.089803132  | 1.620507517  | 0.106099113 | 0.223021913 | no |
| ALDOA        | 0.089796539  | 1.620387582  | 0.10612487  | 0.223054238 | no |
| DEFB134      | -0.089776218 | -1.620017911 | 0.106204292 | 0.22319934  | no |
| PSG3         | 0.089765835  | 1.619829021  | 0.106244893 | 0.223262833 | no |
| LOC151171    | -0.089762463 | -1.619767687 | 0.106258079 | 0.223268711 | no |
| OR4K15       | 0.089742665  | 1.619407525  | 0.106335535 | 0.223409618 | no |
| SCG5         | -0.089721027 | -1.619013895 | 0.10642024  | 0.223565725 | no |
| RNF138P1     | -0.089710202 | -1.618816975 | 0.106462635 | 0.223632928 | no |
| RAB40A       | -0.089696742 | -1.618572125 | 0.106515368 | 0.223721831 | no |
| DSCR9        | -0.089694052 | -1.618523191 | 0.106525909 | 0.223722106 | no |
| C6orf165     | 0.089677594  | 1.6182238    | 0.106590422 | 0.22383572  | no |
| CEP76        | -0.089674393 | -1.618165572 | 0.106602973 | 0.223840204 | no |
| VPS45        | -0.089665784 | -1.618008958 | 0.106636735 | 0.223889222 | no |
| DENND6B      | -0.089650701 | -1.617734577 | 0.106695906 | 0.223991572 | no |
| EGLN2        | 0.089638321  | 1.617509377  | 0.106744491 | 0.22407168  | no |
| FAM76A       | 0.089628341  | 1.617327833  | 0.106783671 | 0.224132031 | no |
| ADAMTS16     | 0.089601056  | 1.616831482  | 0.106890847 | 0.224335077 | no |
| INTS4L2      | -0.089593615 | -1.61669614  | 0.106920086 | 0.224374531 | no |
| LMBR1        | -0.089585776 | -1.616553537 | 0.106950901 | 0.224400249 | no |
| RBPJ         | -0.089585185 | -1.616542784 | 0.106953224 | 0.224400249 | no |
| DSCAM-AS1    | -0.089565219 | -1.616179581 | 0.107031741 | 0.224543065 | no |
| PRR4         | 0.08955928   | 1.616071563  | 0.107055101 | 0.224564039 | no |
| DYNC2H1      | -0.089557365 | -1.616036718 | 0.107062638 | 0.224564039 | no |
| SBSPON       | 0.089538374  | 1.615691267  | 0.107137377 | 0.224698874 | no |
| DVL3         | -0.089501035 | -1.615012054 | 0.107284447 | 0.224985367 | no |
| ABCD4        | 0.08949224   | 1.614852059  | 0.107319113 | 0.225036108 | no |
| METTL21C     | -0.089487559 | -1.614766915 | 0.107337566 | 0.225052842 | no |

|              |              |              |             |             |    |
|--------------|--------------|--------------|-------------|-------------|----|
| PABPC1L      | 0.089473328  | 1.614508053  | 0.107393681 | 0.225118137 | no |
| KRTAP9-8     | 0.089471031  | 1.614446627  | 0.107402741 | 0.225118137 | no |
| C7orf57      | 0.089469311  | 1.614434985  | 0.107409525 | 0.225118137 | no |
| AKT1         | -0.089469037 | -1.614429992 | 0.107410608 | 0.225118137 | no |
| LINC00343    | -0.089464285 | -1.614343565 | 0.107429351 | 0.225135464 | no |
| PRKAR2A      | 0.089451287  | 1.614107132  | 0.107480639 | 0.225194074 | no |
| TMC6         | 0.089450706  | 1.614096553  | 0.107482934 | 0.225194074 | no |
| RASAL1       | -0.089449231 | -1.614069728 | 0.107488754 | 0.225194074 | no |
| BAD          | -0.089445473 | -1.614001358 | 0.10750359  | 0.225203201 | no |
| MATN1-AS1    | 0.089441299  | 1.61392544   | 0.107520065 | 0.225215762 | no |
| PDE1B        | -0.089423275 | -1.613597577 | 0.107591239 | 0.225342882 | no |
| NUP35        | -0.089414434 | -1.613436771 | 0.107626161 | 0.225394057 | no |
| PLCXD3       | 0.089408991  | 1.613337766  | 0.107647666 | 0.225417128 | no |
| SYVN1        | 0.089403929  | 1.61324569   | 0.107667669 | 0.225424975 | no |
| PP7080       | -0.089402734 | -1.613223954 | 0.107672392 | 0.225424975 | no |
| FAM9B        | 0.089399974  | 1.61317374   | 0.107683302 | 0.225425857 | no |
| TTC32        | -0.089390872 | -1.613008178 | 0.107719282 | 0.225471605 | no |
| MLC1         | -0.089389138 | -1.612976633 | 0.107726138 | 0.225471605 | no |
| TNRC18       | -0.089374657 | -1.612713226 | 0.107783404 | 0.225569493 | no |
| WASH1        | -0.089364475 | -1.612528023 | 0.107823682 | 0.225631816 | no |
| PRPH2        | -0.089360751 | -1.612460287 | 0.107838416 | 0.225640678 | no |
| CT60         | -0.089351721 | -1.612296032 | 0.107874153 | 0.225693479 | no |
| LOC100506274 | -0.089344026 | -1.612156059 | 0.107904614 | 0.225714463 | no |
| ACTR10       | -0.089343881 | -1.61215342  | 0.107905188 | 0.225714463 | no |
| SAGE1        | 0.089314867  | 1.611625676  | 0.108020097 | 0.225932837 | no |
| SIGLEC6      | 0.089303622  | 1.611421146  | 0.108064657 | 0.225978276 | no |
| ARAF         | -0.089300079 | -1.611356684 | 0.108078704 | 0.225978276 | no |
| PP2D1        | -0.089298818 | -1.611333763 | 0.108083699 | 0.225978276 | no |
| PRKD3        | 0.089298772  | 1.611332927  | 0.108083881 | 0.225978276 | no |
| WBSCR22      | -0.089260016 | -1.610627974 | 0.1082376   | 0.226277651 | no |
| LOC100132891 | 0.089246013  | 1.610373272  | 0.108293181 | 0.226371827 | no |
| SLC26A4      | -0.089240127 | -1.610266212 | 0.108316551 | 0.226398657 | no |
| GTF3C3       | -0.089220756 | -1.609913876 | 0.108393489 | 0.226537438 | no |
| NXF4         | -0.089215014 | -1.609809437 | 0.108416303 | 0.226563085 | no |
| FAM35BP      | -0.089201186 | -1.60955792  | 0.108471262 | 0.226646136 | no |
| AZGP1P1      | -0.089199623 | -1.609529491 | 0.108477475 | 0.226646136 | no |
| LOC728175    | 0.089197055  | 1.609482786  | 0.108487683 | 0.226646136 | no |
| GINS4        | 0.089194138  | 1.609429729  | 0.108499281 | 0.226648332 | no |
| SLC22A10     | -0.089186801 | -1.609296267 | 0.108528458 | 0.22668434  | no |
| TFPI         | 0.089182809  | 1.609223657  | 0.108544335 | 0.22668434  | no |
| DND1         | -0.089181847 | -1.609206158 | 0.108548162 | 0.22668434  | no |
| LOC100134368 | -0.08916495  | -1.608898821 | 0.108615385 | 0.226802686 | no |
| KRT16        | 0.089155121  | 1.608720047  | 0.108654503 | 0.226862327 | no |
| ZNF311       | -0.089123074 | -1.608137161 | 0.108782125 | 0.227106727 | no |
| MCM4         | -0.08910284  | -1.607769132 | 0.108862765 | 0.227253006 | no |
| ABCC9        | 0.089092996  | 1.607590087  | 0.108902014 | 0.227312857 | no |
| SLC25A12     | -0.089084439 | -1.607434449 | 0.10893614  | 0.227362008 | no |
| ANKS3        | -0.089040339 | -1.606632357 | 0.109112149 | 0.227707244 | no |
| RPS6KA2-IT1  | -0.08903095  | -1.606461585 | 0.109149652 | 0.227763391 | no |
| SELO         | -0.089021245 | -1.60628507  | 0.109188427 | 0.227822182 | no |
| ANP32E       | -0.089018175 | -1.606229233 | 0.109200695 | 0.22782566  | no |

|              |              |              |             |             |    |
|--------------|--------------|--------------|-------------|-------------|----|
| TUBBP5       | 0.089003187  | 1.605956634  | 0.109260603 | 0.22792852  | no |
| B3GALT1      | -0.088995726 | -1.605820932 | 0.109290435 | 0.227961264 | no |
| FKBP2        | -0.088993956 | -1.60578874  | 0.109297513 | 0.227961264 | no |
| MIR320B2     | 0.088957997  | 1.605134739  | 0.109441386 | 0.228239188 | no |
| NOL4         | -0.088933208 | -1.604683885 | 0.109540657 | 0.228424049 | no |
| STX16        | 0.088914029  | 1.604335061  | 0.109617511 | 0.228562135 | no |
| DGKH         | 0.088910797  | 1.604276286  | 0.109630465 | 0.228566969 | no |
| RNF4         | 0.088892785  | 1.603948685  | 0.109702689 | 0.228695362 | no |
| DMRTA2       | 0.088889777  | 1.603893986  | 0.109714752 | 0.228698325 | no |
| ATP5E        | 0.088876715  | 1.603656416  | 0.109767155 | 0.228785369 | no |
| PRICKLE2-AS3 | -0.088851854 | -1.603204267 | 0.109866946 | 0.228971154 | no |
| EIF2B2       | -0.088842417 | -1.603032629 | 0.109904846 | 0.229027931 | no |
| MGAT3        | -0.088836043 | -1.602916708 | 0.109930449 | 0.229041746 | no |
| RDH12        | 0.08883546   | 1.602906106  | 0.109932791 | 0.229041746 | no |
| INTS12       | -0.088824554 | -1.602707755 | 0.109976611 | 0.229110833 | no |
| SPC25        | -0.088801288 | -1.602284621 | 0.110070138 | 0.229283448 | no |
| FMN2         | -0.088787979 | -1.602042569 | 0.110123667 | 0.229358935 | no |
| FEV          | -0.088786971 | -1.602024244 | 0.110127721 | 0.229358935 | no |
| CD70         | 0.088760013  | 1.601533953  | 0.110236215 | 0.229562645 | no |
| MAN1B1       | -0.088748004 | -1.601315565 | 0.110284569 | 0.229641087 | no |
| WTIP         | 0.088726176  | 1.60091858   | 0.110372508 | 0.229801935 | no |
| KLK9         | -0.088719541 | -1.600797917 | 0.110399248 | 0.229835343 | no |
| METTL25      | 0.088714649  | 1.600708954  | 0.110418967 | 0.229854128 | no |
| LOC400456    | 0.088703092  | 1.600498767  | 0.110465565 | 0.229928859 | no |
| FRAS1        | -0.088693551 | -1.600325256 | 0.110504045 | 0.229986677 | no |
| SWI5         | 0.088670912  | 1.599913521  | 0.110595397 | 0.230129971 | no |
| DKK3         | 0.088669724  | 1.599891921  | 0.110600191 | 0.230129971 | no |
| RPSA         | -0.088668528 | -1.599870167 | 0.110605019 | 0.230129971 | no |
| ATP10B       | 0.088657844  | 1.599675875  | 0.110648151 | 0.230167612 | no |
| LOC728752    | -0.0886558   | -1.599638694 | 0.110656407 | 0.230167612 | no |
| LOC100505619 | 0.088655152  | 1.59962692   | 0.110659021 | 0.230167612 | no |
| MRPL4        | -0.088653436 | -1.599595715 | 0.11066595  | 0.230167612 | no |
| PTK7         | 0.088650296  | 1.599538609  | 0.110678631 | 0.230171712 | no |
| VPS54        | 0.088615362  | 1.598903293  | 0.110819792 | 0.230442975 | no |
| GBA2         | -0.088609267 | -1.598792444 | 0.110844436 | 0.23047192  | no |
| ZNF486       | -0.088599756 | -1.598619477 | 0.110882899 | 0.23052959  | no |
| FLJ40292     | -0.088593759 | -1.598510422 | 0.110907155 | 0.230557716 | no |
| FAM180B      | 0.088581749  | 1.598292011  | 0.110955747 | 0.23063642  | no |
| MRPS2        | -0.088562817 | -1.597947706 | 0.111032381 | 0.230773396 | no |
| EFHA1        | -0.08854776  | -1.597673885 | 0.111093358 | 0.230877803 | no |
| MAPK6        | -0.088528884 | -1.59733062  | 0.111169837 | 0.231014404 | no |
| PCDHGB2      | -0.08850576  | -1.596910101 | 0.111263584 | 0.23118686  | no |
| ITGA10       | 0.088500245  | 1.596809802  | 0.111285953 | 0.231210984 | no |
| IFNA17       | 0.088497125  | 1.596753072  | 0.111298607 | 0.231214922 | no |
| ZNF507       | -0.088480037 | -1.596442323 | 0.111367941 | 0.231336596 | no |
| NPC1L1       | 0.088467194  | 1.59620876   | 0.111420075 | 0.231422523 | no |
| PSMA3        | -0.088439916 | -1.595712697 | 0.111530868 | 0.231610961 | no |
| TMEM256      | -0.088438909 | -1.595694396 | 0.111534957 | 0.231610961 | no |
| PDIA3P       | 0.088436661  | 1.595653516  | 0.111544092 | 0.231610961 | no |
| ALKBH2       | -0.088434245 | -1.595609583 | 0.111553909 | 0.231610961 | no |
| RTN4         | -0.088419822 | -1.595347287 | 0.111612536 | 0.231710299 | no |

|              |              |              |             |             |    |
|--------------|--------------|--------------|-------------|-------------|----|
| SMIM6        | -0.088412587 | -1.595215723 | 0.111641952 | 0.23174898  | no |
| EIF4A1       | 0.088402897  | 1.595039515  | 0.111681359 | 0.231808391 | no |
| C1QL2        | -0.088385792 | -1.594728458 | 0.11175095  | 0.231912196 | no |
| PSMC6        | -0.0883853   | -1.594719511 | 0.111752953 | 0.231912196 | no |
| NHEG1        | -0.088374335 | -1.594520112 | 0.111797582 | 0.231982412 | no |
| SNX17        | 0.088367941  | 1.594403849  | 0.11182361  | 0.232014019 | no |
| SLC31A2      | 0.088352848  | 1.59412938   | 0.111885076 | 0.232119141 | no |
| ZNF512B      | -0.088344416 | -1.59397604  | 0.111919428 | 0.232167995 | no |
| ALS2         | -0.088333238 | -1.593772775 | 0.111964977 | 0.232212189 | no |
| TRIO         | -0.088331004 | -1.593732144 | 0.111974083 | 0.232212189 | no |
| HRASLS2      | 0.088328732  | 1.593690845  | 0.11198334  | 0.232212189 | no |
| TRAM1L1      | -0.088325947 | -1.593640201 | 0.111994692 | 0.232212189 | no |
| OR7E37P      | -0.088325931 | -1.593639908 | 0.111994758 | 0.232212189 | no |
| PRKAR2B      | -0.088315715 | -1.593454125 | 0.112036411 | 0.232263238 | no |
| CCT2         | -0.088312859 | -1.593402198 | 0.112048055 | 0.232263238 | no |
| ACSF3        | 0.088311941  | 1.593385495  | 0.112051801 | 0.232263238 | no |
| ZNF227       | -0.088295967 | -1.593095014 | 0.112116959 | 0.232375886 | no |
| PRNP         | -0.088288141 | -1.592952702 | 0.112148892 | 0.232419656 | no |
| GPRC5C       | -0.088282074 | -1.592842379 | 0.112173652 | 0.232448553 | no |
| FOXK1        | -0.088276364 | -1.592738551 | 0.112196958 | 0.232458428 | no |
| CLP1         | 0.088275606  | 1.592724777  | 0.11220005  | 0.232458428 | no |
| PLCXD1       | -0.088266874 | -1.592565983 | 0.112235703 | 0.232509879 | no |
| SNORA74B     | -0.088244084 | -1.592151572 | 0.112328789 | 0.23268029  | no |
| SLC25A22     | -0.088239277 | -1.592064157 | 0.112348433 | 0.232698551 | no |
| SNORA66      | 0.088208968  | 1.591513009  | 0.112472346 | 0.232932753 | no |
| LSG1         | 0.088195933  | 1.591275982  | 0.112525669 | 0.233020731 | no |
| CLTC         | 0.088170269  | 1.590809309  | 0.112630713 | 0.233215788 | no |
| LOC100129924 | -0.088150547 | -1.590450691 | 0.112711489 | 0.233360559 | no |
| NS3BP        | -0.088131436 | -1.590103182 | 0.112789805 | 0.233500212 | no |
| DIP2A        | -0.088126992 | -1.590022375 | 0.112808022 | 0.233515431 | no |
| STX17        | 0.088122542  | 1.589941466  | 0.112826265 | 0.2335307   | no |
| TMEM128      | -0.088106932 | -1.589657611 | 0.112890285 | 0.233606951 | no |
| SERBP1       | 0.088105934  | 1.589639473  | 0.112894376 | 0.233606951 | no |
| SDCCAG8      | 0.088104981  | 1.589622135  | 0.112898288 | 0.233606951 | no |
| MUS81        | -0.088102959 | -1.589585361 | 0.112906584 | 0.233606951 | no |
| MINOS1       | 0.088089901  | 1.589347925  | 0.112960163 | 0.23367393  | no |
| AKAP1        | -0.088089769 | -1.589345533 | 0.112960703 | 0.23367393  | no |
| INSIG2       | 0.088073919  | 1.589057332  | 0.113025764 | 0.233767214 | no |
| MATN2        | 0.088073484  | 1.589049414  | 0.113027552 | 0.233767214 | no |
| ING4         | -0.088050923 | -1.588639177 | 0.113120215 | 0.233936349 | no |
| LOC100129534 | 0.088034502  | 1.588340597  | 0.113187695 | 0.234053378 | no |
| FLJ45340     | -0.088028009 | -1.588222527 | 0.113214388 | 0.234080038 | no |
| SLC12A6      | -0.088026067 | -1.588187217 | 0.113222372 | 0.234080038 | no |
| ALG11        | -0.088010455 | -1.587903338 | 0.113286575 | 0.234190244 | no |
| GTDC1        | -0.088000533 | -1.587722293 | 0.113327391 | 0.234252089 | no |
| SPINK7       | -0.087990234 | -1.587535668 | 0.113369771 | 0.234317152 | no |
| CDH13        | 0.087976464  | 1.587285286  | 0.113426455 | 0.234411765 | no |
| SLC25A13     | 0.0879676    | 1.587124108  | 0.113462956 | 0.234464652 | no |
| CCDC157      | -0.087944216 | -1.586698925 | 0.113559289 | 0.234641157 | no |
| HSPA6        | 0.087932349  | 1.586483161  | 0.113608199 | 0.23471965  | no |
| KLHL3        | -0.08791783  | -1.586219157 | 0.113668066 | 0.234820765 | no |

|              |              |              |             |             |    |
|--------------|--------------|--------------|-------------|-------------|----|
| LOC283922    | -0.08790228  | -1.585936425 | 0.113732209 | 0.23493069  | no |
| LOC100287225 | -0.087861359 | -1.585192379 | 0.113901145 | 0.235239078 | no |
| MINOS1P1     | -0.087860386 | -1.585174683 | 0.113905165 | 0.235239078 | no |
| CCDC158      | 0.087858165  | 1.5851343    | 0.11391434  | 0.235239078 | no |
| EGOT         | 0.087853043  | 1.585041171  | 0.113935501 | 0.23526017  | no |
| PDXK         | -0.087843796 | -1.584873044 | 0.113973711 | 0.235316459 | no |
| LDHD         | -0.08782587  | -1.584547116 | 0.114047813 | 0.235446835 | no |
| LOC642426    | -0.087821629 | -1.584469988 | 0.114065354 | 0.235460429 | no |
| RNF214       | -0.087818112 | -1.584406059 | 0.114079895 | 0.235467828 | no |
| VRK1         | -0.087812303 | -1.584300437 | 0.114103922 | 0.235494804 | no |
| RPL19P12     | -0.087803465 | -1.584139734 | 0.114140488 | 0.235532729 | no |
| IGF1R        | -0.087802466 | -1.584121565 | 0.114144622 | 0.235532729 | no |
| PSMD4        | -0.087799915 | -1.584075188 | 0.114155177 | 0.235532729 | no |
| GPR137B      | -0.087775438 | -1.583630144 | 0.114256497 | 0.23571915  | no |
| HNMT         | 0.087770874  | 1.583547167  | 0.114275396 | 0.235735509 | no |
| PRPF38B      | 0.087751695  | 1.58319845   | 0.114354847 | 0.235876764 | no |
| TBC1D7       | -0.087741527 | -1.583013592 | 0.114396982 | 0.23594103  | no |
| SLC17A8      | -0.087722741 | -1.582672031 | 0.114474867 | 0.23607901  | no |
| UBA52        | -0.087671167 | -1.581734321 | 0.114688906 | 0.236497723 | no |
| BCL7B        | 0.087631249  | 1.581008564  | 0.114854782 | 0.236808371 | no |
| MAMDC4       | -0.087624305 | -1.58088232  | 0.114883655 | 0.236808371 | no |
| PRKCSH       | -0.087623186 | -1.580861964 | 0.114888311 | 0.236808371 | no |
| SCN1A        | -0.087622153 | -1.580843186 | 0.114892607 | 0.236808371 | no |
| CCDC38       | -0.087621662 | -1.58083426  | 0.114894648 | 0.236808371 | no |
| TMTC4        | -0.087614639 | -1.580706581 | 0.114923858 | 0.23684586  | no |
| WNT2         | 0.087606396  | 1.580556712  | 0.114958151 | 0.236893818 | no |
| SATL1        | -0.087591197 | -1.58028037  | 0.115021405 | 0.237001441 | no |
| CHD1L        | -0.087588492 | -1.58023119  | 0.115032666 | 0.237001919 | no |
| KCNK10       | -0.087583767 | -1.580145291 | 0.115052335 | 0.237019721 | no |
| LRIT3        | -0.087572608 | -1.579942408 | 0.115098802 | 0.237066708 | no |
| STARD9       | -0.08757145  | -1.579921354 | 0.115103625 | 0.237066708 | no |
| ADARB2-AS1   | -0.087570343 | -1.579901227 | 0.115108236 | 0.237066708 | no |
| EFNB1        | 0.087552892  | 1.579583962  | 0.115180935 | 0.237193701 | no |
| ARG1         | 0.087545827  | 1.579455512  | 0.115210378 | 0.237231603 | no |
| DHFRL1       | -0.087531501 | -1.579195058 | 0.115270098 | 0.237331834 | no |
| MYOM1        | -0.087526965 | -1.579112578 | 0.115289016 | 0.237348044 | no |
| TOMM20L      | -0.087521861 | -1.579019795 | 0.115310299 | 0.237369122 | no |
| DUSP7        | -0.087512882 | -1.57885654  | 0.115347755 | 0.237423484 | no |
| C17orf49     | 0.087434421  | 1.577430088  | 0.115675438 | 0.238075162 | no |
| TBC1D25      | -0.087423211 | -1.577226288 | 0.115722315 | 0.238148834 | no |
| ZNF490       | -0.087413939 | -1.577057723 | 0.115761099 | 0.238205838 | no |
| VMA21        | -0.087405593 | -1.576905984 | 0.11579602  | 0.238246157 | no |
| FDXACB1      | -0.087403957 | -1.576876246 | 0.115802864 | 0.238246157 | no |
| ZNF284       | -0.087388206 | -1.576589883 | 0.115868793 | 0.238358977 | no |
| PFN4         | 0.08738069   | 1.576453254  | 0.11590026  | 0.238400888 | no |
| LEMD2        | 0.087341287  | 1.575736912  | 0.116065347 | 0.238717617 | no |
| TFIP11       | -0.087335677 | -1.57563491  | 0.116088869 | 0.238743148 | no |
| THY1         | 0.087326857  | 1.575474572  | 0.116125852 | 0.238796353 | no |
| STK35        | 0.087316884  | 1.575293257  | 0.116167685 | 0.238859521 | no |
| SMARCA5      | -0.087305623 | -1.575088542 | 0.11621493  | 0.238933804 | no |
| DDX12P       | -0.087278251 | -1.574590934 | 0.116329834 | 0.239147165 | no |

|              |              |              |             |             |    |
|--------------|--------------|--------------|-------------|-------------|----|
| SNAPC2       | 0.08723884   | 1.57387447   | 0.116495433 | 0.239445216 | no |
| FRMD6        | 0.087238444  | 1.57386726   | 0.1164971   | 0.239445216 | no |
| PMS2P4       | 0.087232752  | 1.573763782  | 0.116521033 | 0.239471504 | no |
| ZSCAN30      | -0.087228231 | -1.573681594 | 0.116540044 | 0.239487674 | no |
| NIPA1        | -0.087208844 | -1.573329162 | 0.116621596 | 0.239614313 | no |
| LOC401010    | -0.08720828  | -1.57331891  | 0.116623969 | 0.239614313 | no |
| CBX8         | -0.087192429 | -1.57303075  | 0.116690683 | 0.239728464 | no |
| TM9SF3       | -0.087183896 | -1.57287563  | 0.116726608 | 0.239779347 | no |
| CRLF1        | -0.087166403 | -1.572557612 | 0.116800287 | 0.239907767 | no |
| CCR9         | 0.087144798  | 1.572164862  | 0.116891331 | 0.240071827 | no |
| HGS          | -0.087117399 | -1.571666772 | 0.117006875 | 0.240286168 | no |
| FAM90A7P     | -0.087111134 | -1.571552886 | 0.117033306 | 0.240317482 | no |
| LCE1C        | 0.087101713  | 1.571381633  | 0.11707306  | 0.240376147 | no |
| CD81         | 0.087070177  | 1.570808344  | 0.117206218 | 0.240610976 | no |
| RBP1         | 0.087069259  | 1.570791653  | 0.117210097 | 0.240610976 | no |
| SERF1A       | -0.087066673 | -1.570744653 | 0.117221019 | 0.240610976 | no |
| WDR13        | -0.087060492 | -1.570632287 | 0.117247135 | 0.240641599 | no |
| ZNF2         | -0.087053536 | -1.570505842 | 0.117276529 | 0.240678942 | no |
| ZNF728       | -0.087048417 | -1.570412787 | 0.117298164 | 0.240700358 | no |
| TANK         | 0.087025725  | 1.570000275  | 0.117394112 | 0.240874247 | no |
| CIDEA        | -0.087018608 | -1.569870911 | 0.117424214 | 0.240913011 | no |
| SIDT1        | -0.087003039 | -1.569587891 | 0.117490092 | 0.24102516  | no |
| PPP1R36      | 0.086974499  | 1.569069084  | 0.117610929 | 0.241250022 | no |
| DACH1        | -0.086949186 | -1.568608936 | 0.117718186 | 0.241427785 | no |
| RTEL1        | -0.086947293 | -1.568574535 | 0.117726208 | 0.241427785 | no |
| STK4-AS1     | 0.086943896  | 1.568512785  | 0.117740608 | 0.241427785 | no |
| TTC39C       | 0.086943444  | 1.568504562  | 0.117742525 | 0.241427785 | no |
| KIAA0895     | -0.086918329 | -1.56804802  | 0.117849035 | 0.241623126 | no |
| FAM73A       | -0.086913066 | -1.567952352 | 0.117871364 | 0.241645853 | no |
| HDHD1        | -0.086900813 | -1.567729624 | 0.117923361 | 0.241729392 | no |
| MIR100HG     | -0.086893736 | -1.567600978 | 0.117953402 | 0.241767912 | no |
| PMEL         | 0.086858709  | 1.566964272  | 0.118102174 | 0.242049763 | no |
| ADSSL1       | 0.086844306  | 1.566702473  | 0.118163388 | 0.242152129 | no |
| IL1RAP       | -0.086830496 | -1.566451428 | 0.118222112 | 0.242249371 | no |
| TMEM200A     | 0.08681352   | 1.566142852  | 0.118294324 | 0.242374232 | no |
| SLC22A16     | 0.08678191   | 1.565568279  | 0.118428877 | 0.242620823 | no |
| ABCC10       | 0.086779943  | 1.565532519  | 0.118437255 | 0.242620823 | no |
| TRIM47       | 0.086772296  | 1.565393514  | 0.118469827 | 0.242643994 | no |
| FAM58A       | -0.086771922 | -1.565386729 | 0.118471417 | 0.242643994 | no |
| UGT2B15      | -0.086769335 | -1.565339705 | 0.118482438 | 0.242643994 | no |
| PSMD12       | 0.086729688  | 1.564619032  | 0.118651435 | 0.242945229 | no |
| MAGEA10-MAGE | 0.086729523  | 1.564616031  | 0.118652139 | 0.242945229 | no |
| WWC3         | 0.086726692  | 1.564564573  | 0.118664213 | 0.242946805 | no |
| LOC149086    | 0.086715925  | 1.564368864  | 0.118710144 | 0.243017689 | no |
| HNRNPA3P1    | 0.086700625  | 1.564090754  | 0.118775436 | 0.243118564 | no |
| TMEM242      | -0.086699076 | -1.564062614 | 0.118782045 | 0.243118564 | no |
| NPBWR2       | -0.086695815 | -1.564003334 | 0.118795966 | 0.243123903 | no |
| TRAPPC10     | 0.086688711  | 1.563874208  | 0.118826295 | 0.243162817 | no |
| CTU2         | -0.086675519 | -1.563634413 | 0.118882634 | 0.243254946 | no |
| PHF12        | -0.086639787 | -1.562984927 | 0.119035335 | 0.243522019 | no |
| SEC11C       | 0.086637095  | 1.562936005  | 0.119046843 | 0.243522019 | no |

|              |              |              |             |             |    |
|--------------|--------------|--------------|-------------|-------------|----|
| PWWP2A       | 0.086637023  | 1.562934694  | 0.119047151 | 0.243522019 | no |
| CIRBP-AS1    | 0.086625441  | 1.562724168  | 0.119096685 | 0.24358971  | no |
| ZNF45        | 0.086623985  | 1.56269771   | 0.119102911 | 0.24358971  | no |
| RBM38        | 0.086612936  | 1.562496885  | 0.11915018  | 0.243663194 | no |
| LOC158435    | -0.086608707 | -1.562420008 | 0.119168278 | 0.243669084 | no |
| CCM2         | 0.086606964  | 1.562388333  | 0.119175736 | 0.243669084 | no |
| WNK1         | -0.086595818 | -1.562185738 | 0.119223444 | 0.243723278 | no |
| LOC100506054 | -0.086595473 | -1.562179456 | 0.119224923 | 0.243723278 | no |
| LZTFL1       | 0.086574438  | 1.561797135  | 0.119314996 | 0.243873773 | no |
| FAM45A       | -0.086571775 | -1.561748731 | 0.119326403 | 0.243873773 | no |
| ANKLE1       | -0.086570332 | -1.561722499 | 0.119332586 | 0.243873773 | no |
| CNPPD1       | 0.086565807  | 1.561640253  | 0.119351971 | 0.243890198 | no |
| PAK4         | 0.086539843  | 1.561168324  | 0.119463256 | 0.244094394 | no |
| MIR3180-4    | -0.086531574 | -1.561018022 | 0.119498715 | 0.244143635 | no |
| GFRA4        | -0.086518414 | -1.560778836 | 0.119555162 | 0.244224632 | no |
| TNMD         | 0.086517033  | 1.560753726  | 0.119561089 | 0.244224632 | no |
| ZDHHC8       | -0.086495266 | -1.5603581   | 0.119654503 | 0.244392219 | no |
| AP3M1        | -0.086480917 | -1.560097303 | 0.119716114 | 0.244494821 | no |
| HECA         | 0.086476289  | 1.560013181  | 0.119735992 | 0.244512182 | no |
| CUX1         | -0.08645304  | -1.55959061  | 0.119835886 | 0.244692923 | no |
| ACTN1-AS1    | 0.086445541  | 1.559454314  | 0.119868119 | 0.244735489 | no |
| ERVV-1       | -0.086436034 | -1.55928152  | 0.119908995 | 0.244795688 | no |
| LOC642236    | -0.086400447 | -1.558634714 | 0.120062097 | 0.245084966 | no |
| CCDC74B-AS1  | -0.086397781 | -1.558586257 | 0.120073573 | 0.245085114 | no |
| GPR149       | -0.086373401 | -1.558143139 | 0.120178558 | 0.245255879 | no |
| RABGAP1L     | 0.086371409  | 1.558106945  | 0.120187136 | 0.245255879 | no |
| KCNAB2       | -0.086370403 | -1.558088655 | 0.120191472 | 0.245255879 | no |
| FUT5         | -0.086367066 | -1.558027998 | 0.120205849 | 0.24526193  | no |
| LRRC20       | -0.086363558 | -1.557964248 | 0.120220962 | 0.245269479 | no |
| ACO1         | -0.086342794 | -1.557586859 | 0.120310456 | 0.245428762 | no |
| ANKS4B       | -0.086338489 | -1.557508613 | 0.120329018 | 0.24544333  | no |
| ESYT3        | -0.086305072 | -1.556901259 | 0.120473173 | 0.245695259 | no |
| MOB2         | -0.086304537 | -1.556891538 | 0.120475482 | 0.245695259 | no |
| USP5         | -0.086301909 | -1.556843776 | 0.120486824 | 0.245695259 | no |
| C1orf27      | 0.086294083  | 1.55670154   | 0.120520606 | 0.245740699 | no |
| FAM193A      | -0.08629145  | -1.556653673 | 0.120531977 | 0.245740699 | no |
| LOC90834     | -0.086286292 | -1.556559938 | 0.120554245 | 0.245762786 | no |
| ZFAND1       | -0.086264737 | -1.556168183 | 0.12064735  | 0.24592926  | no |
| LINC00642    | -0.086260838 | -1.556097319 | 0.120664197 | 0.245940275 | no |
| SNORA5C      | -0.086256689 | -1.556021913 | 0.120682127 | 0.245953493 | no |
| ZNF678       | -0.086247219 | -1.555849794 | 0.120723059 | 0.246013585 | no |
| ZNF571       | -0.086237555 | -1.555674162 | 0.120764839 | 0.246075391 | no |
| LOC100132078 | -0.08622646  | -1.555472503 | 0.120812824 | 0.246149829 | no |
| SPINK6       | 0.086194361  | 1.554889121  | 0.120951724 | 0.246409471 | no |
| NUP85        | 0.086188321  | 1.554779355  | 0.120977873 | 0.246426109 | no |
| CALB1        | -0.086187178 | -1.554758574 | 0.120982824 | 0.246426109 | no |
| SPTBN1       | -0.086155761 | -1.5541876   | 0.121118919 | 0.246679937 | no |
| COQ9         | -0.086150182 | -1.554086215 | 0.121143098 | 0.246705801 | no |
| DOC2A        | -0.086145671 | -1.554004223 | 0.121162654 | 0.246722247 | no |
| DHX57        | -0.086138418 | -1.55387241  | 0.121194099 | 0.246762896 | no |
| RPUSD3       | -0.08611349  | -1.55341937  | 0.121302222 | 0.246959648 | no |



|              |              |              |             |             |    |
|--------------|--------------|--------------|-------------|-------------|----|
| PLCE1        | 0.086104908  | 1.553263394  | 0.121339465 | 0.246998924 | no |
| PCOLCE2      | 0.086103748  | 1.553242311  | 0.1213445   | 0.246998924 | no |
| NOSIP        | -0.086087507 | -1.552947157 | 0.121415002 | 0.247099213 | no |
| IL36B        | 0.086085599  | 1.552912476  | 0.121423288 | 0.247099213 | no |
| PRPS1        | -0.086084453 | -1.552891656 | 0.121428263 | 0.247099213 | no |
| LOC643529    | 0.086073007  | 1.552683634  | 0.121477975 | 0.247173109 | no |
| MCOLN3       | 0.086070796  | 1.552643457  | 0.121487579 | 0.247173109 | no |
| JMJD8        | 0.08605165   | 1.552295491  | 0.121570776 | 0.247318965 | no |
| ACTR3        | 0.086023756  | 1.551788563  | 0.121692061 | 0.247542269 | no |
| PCDH9-AS2    | -0.086019298 | -1.551707543 | 0.121711454 | 0.247542641 | no |
| CUL4A        | 0.086018419  | 1.551691558  | 0.12171528  | 0.247542641 | no |
| KLC3         | -0.086007063 | -1.551485193 | 0.121764688 | 0.247619693 | no |
| CBWD5        | 0.086002129  | 1.551395529  | 0.121786161 | 0.247639927 | no |
| SULT1A1      | 0.085994941  | 1.551264897  | 0.12181745  | 0.247680114 | no |
| LEP          | 0.085967071  | 1.55075839   | 0.121938827 | 0.247903446 | no |
| ZNF347       | -0.085953246 | -1.550507151 | 0.121999068 | 0.248002456 | no |
| PCGF1        | 0.085948643  | 1.550423496  | 0.122019131 | 0.248019781 | no |
| IFNL2        | -0.085936778 | -1.550207871 | 0.122070858 | 0.248085957 | no |
| PSMG3-AS1    | 0.085935879  | 1.550191545  | 0.122074775 | 0.248085957 | no |
| TOPBP1       | -0.085925746 | -1.550007387 | 0.122118968 | 0.24811143  | no |
| MAGEA8       | 0.0859255    | 1.550002917  | 0.122120041 | 0.24811143  | no |
| LOC284009    | -0.085923585 | -1.549968117 | 0.122128394 | 0.24811143  | no |
| LHX1         | -0.085920999 | -1.549921132 | 0.122139672 | 0.24811143  | no |
| PPP1R14C     | -0.085919317 | -1.549890552 | 0.122147012 | 0.24811143  | no |
| PRG1         | -0.085917124 | -1.549850699 | 0.122156579 | 0.24811143  | no |
| MGC2752      | 0.085912313  | 1.549763275  | 0.122177568 | 0.24813061  | no |
| SNRPE        | -0.085899675 | -1.549533603 | 0.122232722 | 0.248219165 | no |
| EXOSC9       | -0.085871311 | -1.549018149 | 0.122356574 | 0.248447197 | no |
| FLJ12825     | -0.085868651 | -1.548969811 | 0.122368193 | 0.248447316 | no |
| PLEKHG4      | 0.085848968  | 1.548612107  | 0.122454206 | 0.248598464 | no |
| RPL36A       | -0.085830037 | -1.548268092 | 0.122536972 | 0.248742993 | no |
| HSP90AB4P    | -0.08581358  | -1.547969013 | 0.122608963 | 0.248865623 | no |
| IL22RA2      | 0.08580162   | 1.547751681  | 0.122661297 | 0.248948336 | no |
| CCDC178      | -0.085766968 | -1.54712197  | 0.122813032 | 0.249232755 | no |
| ZNF461       | -0.085740692 | -1.546644468 | 0.12292819  | 0.249442897 | no |
| LOC100505761 | -0.08573455  | -1.546532853 | 0.12295512  | 0.24945097  | no |
| PNPLA2       | 0.08573449   | 1.546531764  | 0.122955382 | 0.24945097  | no |
| ASNA1        | -0.08570901  | -1.546068736 | 0.123067149 | 0.249654154 | no |
| HAUS2        | 0.085703044  | 1.545960329  | 0.123093328 | 0.249683549 | no |
| ABCG4        | -0.085700413 | -1.545912517 | 0.123104876 | 0.249683549 | no |
| PARD6G       | 0.085686824  | 1.545665578  | 0.123164529 | 0.249780966 | no |
| MRPL11       | 0.085670802  | 1.54537442   | 0.123234894 | 0.249879049 | no |
| COX18        | -0.085670517 | -1.545369237 | 0.123236147 | 0.249879049 | no |
| KIF26A       | -0.085664346 | -1.5452571   | 0.123263256 | 0.249909787 | no |
| CDC42EP4     | -0.085661772 | -1.545210333 | 0.123274564 | 0.249909787 | no |
| GPX3         | 0.085645754  | 1.544919261  | 0.123344957 | 0.250028907 | no |
| ASCC1        | -0.085633131 | -1.544689876 | 0.123400454 | 0.250094642 | no |
| CMBL         | -0.085629938 | -1.54463186  | 0.123414494 | 0.250094642 | no |
| FAM107A      | -0.085628873 | -1.54461249  | 0.123419181 | 0.250094642 | no |
| LOC100133669 | -0.085627792 | -1.544592851 | 0.123423934 | 0.250094642 | no |
| LOC100505738 | -0.085624979 | -1.544541737 | 0.123436305 | 0.250096128 | no |

|              |              |              |             |             |    |
|--------------|--------------|--------------|-------------|-------------|----|
| LSMD1        | -0.085611937 | -1.544304735 | 0.123493679 | 0.250188787 | no |
| GDPGP1       | 0.085603689  | 1.544154859  | 0.123529972 | 0.25021775  | no |
| CREB5        | -0.085603396 | -1.544149536 | 0.123531261 | 0.25021775  | no |
| GALC         | 0.085581139  | 1.5437451    | 0.123629239 | 0.250392609 | no |
| DDR GK1      | 0.085576295  | 1.543657077  | 0.123650571 | 0.250412215 | no |
| KIAA1324     | 0.085568645  | 1.543518061  | 0.123684268 | 0.250433156 | no |
| ZNF646       | -0.085567165 | -1.543491163 | 0.123690788 | 0.250433156 | no |
| HOXD3        | -0.085566011 | -1.543470199 | 0.12369587  | 0.250433156 | no |
| NIT2         | 0.085547971  | 1.543142384  | 0.123775365 | 0.250570494 | no |
| TPCN1        | 0.085525992  | 1.542743005  | 0.123872267 | 0.250743043 | no |
| PSRC1        | 0.085516307  | 1.542567012  | 0.123914987 | 0.250805895 | no |
| GATM         | 0.085495002  | 1.542179871  | 0.124009002 | 0.250972546 | no |
| PGM5         | 0.085491807  | 1.542121819  | 0.124023105 | 0.250977452 | no |
| SCUBE1       | -0.085477019 | -1.541853112 | 0.124088398 | 0.251085938 | no |
| LOC100507537 | -0.085462797 | -1.541594683 | 0.124151218 | 0.251182637 | no |
| CNBD2        | -0.085460084 | -1.541545384 | 0.124163205 | 0.251182637 | no |
| SRBD1        | 0.085458263  | 1.541512299  | 0.12417125  | 0.251182637 | no |
| CIR1         | -0.085444083 | -1.541254629 | 0.124233919 | 0.251285756 | no |
| CPA2         | -0.085433447 | -1.54106137  | 0.124280939 | 0.251357204 | no |
| ZNF717       | -0.085418628 | -1.540792101 | 0.124346474 | 0.251466085 | no |
| KIAA0226     | -0.085409231 | -1.540621337 | 0.12438805  | 0.251526494 | no |
| THEM4        | -0.085401217 | -1.540475719 | 0.124423512 | 0.251574531 | no |
| LOC100216545 | -0.08539496  | -1.540362038 | 0.124451201 | 0.251606846 | no |
| NUDCD3       | -0.085389665 | -1.540265816 | 0.124474642 | 0.251630565 | no |
| NANOG        | -0.085383651 | -1.540156539 | 0.124501268 | 0.2516531   | no |
| ZNF12        | 0.085381857  | 1.540123949  | 0.124509209 | 0.2516531   | no |
| SNORA63      | -0.085363821 | -1.539796215 | 0.124589093 | 0.251771796 | no |
| KCTD13       | -0.085362337 | -1.539769259 | 0.124595665 | 0.251771796 | no |
| FOLH1B       | -0.085360663 | -1.539738842 | 0.124603082 | 0.251771796 | no |
| PCDHB3       | -0.085353934 | -1.539616565 | 0.124632899 | 0.25180837  | no |
| MTAP         | 0.085342609  | 1.539410783  | 0.124683092 | 0.2518861   | no |
| EFCAB4A      | 0.085321722  | 1.53903127   | 0.124775701 | 0.252031567 | no |
| MTRNR2L3     | -0.085321079 | -1.539019589 | 0.124778553 | 0.252031567 | no |
| LOC100996307 | -0.08531647  | -1.538935838 | 0.124798997 | 0.252049173 | no |
| TMEM17       | 0.085311364  | 1.53884305   | 0.124821651 | 0.252071237 | no |
| FAM111B      | 0.085293803  | 1.538523969  | 0.124899578 | 0.252204908 | no |
| KLRF2        | 0.085288044  | 1.538419331  | 0.124925141 | 0.252232827 | no |
| DDX24        | -0.085260683 | -1.537922188 | 0.125046651 | 0.252454446 | no |
| RGPD2        | -0.085249706 | -1.537722728 | 0.125095428 | 0.252522572 | no |
| POLG         | -0.085245417 | -1.537644796 | 0.12511449  | 0.252522572 | no |
| CCDC64B      | -0.085245157 | -1.537640069 | 0.125115646 | 0.252522572 | no |
| CFHR3        | 0.085231254  | 1.53738745   | 0.125177452 | 0.25261369  | no |
| C4orf45      | -0.085229713 | -1.537359464 | 0.125184301 | 0.25261369  | no |
| SLC25A44     | -0.085226687 | -1.537304473 | 0.125197759 | 0.252617128 | no |
| FRMD4A       | -0.085216001 | -1.53711032  | 0.125245282 | 0.252683843 | no |
| SIK2         | -0.085213965 | -1.53707333  | 0.125254338 | 0.252683843 | no |
| LOC440895    | 0.085210744  | 1.53701479   | 0.125268671 | 0.252689038 | no |
| SMNDC1       | 0.085206741  | 1.536942067  | 0.125286478 | 0.252701239 | no |
| NTN3         | -0.085202315 | -1.536861649 | 0.125306172 | 0.252717243 | no |
| LRRC10       | -0.085197386 | -1.536772079 | 0.125328109 | 0.252726747 | no |
| PCDHA6       | -0.085195971 | -1.536746382 | 0.125334404 | 0.252726747 | no |

|              |              |              |             |             |    |
|--------------|--------------|--------------|-------------|-------------|----|
| PSMA7        | 0.085171458  | 1.536300993  | 0.125443538 | 0.252923078 | no |
| PDE6D        | -0.085168787 | -1.536252459 | 0.125455435 | 0.252923336 | no |
| FAM222B      | -0.085151846 | -1.535944646 | 0.125530908 | 0.253051754 | no |
| UBA3         | -0.08512755  | -1.535503206 | 0.125639208 | 0.253241821 | no |
| GIPC1        | -0.085125408 | -1.535464278 | 0.125648762 | 0.253241821 | no |
| PLIN4        | -0.085117163 | -1.535314468 | 0.125685534 | 0.253292179 | no |
| PCDHA4       | -0.085105366 | -1.535100124 | 0.125738161 | 0.253374478 | no |
| VWA9         | -0.085099086 | -1.534986031 | 0.12576618  | 0.25340718  | no |
| BSG          | -0.085077966 | -1.534602299 | 0.125860456 | 0.253573363 | no |
| MSI1         | -0.085048803 | -1.534072424 | 0.125990727 | 0.253812028 | no |
| POU5F1B      | -0.085040968 | -1.533930071 | 0.126025743 | 0.253855346 | no |
| SLC12A1      | -0.085035056 | -1.533822659 | 0.126052169 | 0.253855346 | no |
| DCAF8        | -0.085034656 | -1.533815391 | 0.126053957 | 0.253855346 | no |
| UGT2B11      | -0.085033421 | -1.533792953 | 0.126059478 | 0.253855346 | no |
| DAXX         | -0.085022136 | -1.533587921 | 0.126109936 | 0.253933161 | no |
| BLMH         | -0.085009631 | -1.533360727 | 0.126165866 | 0.254007771 | no |
| CCZ1         | 0.085008567  | 1.533341388  | 0.126170627 | 0.254007771 | no |
| CHST9        | -0.084994137 | -1.53307922  | 0.126235193 | 0.254102362 | no |
| KDM1B        | -0.084992782 | -1.533054592 | 0.12624126  | 0.254102362 | no |
| N4BP2L2-IT2  | -0.084955255 | -1.532372783 | 0.126409301 | 0.254416771 | no |
| SNX3         | 0.084925158  | 1.531825963  | 0.126544198 | 0.254664422 | no |
| NRM          | 0.084908386  | 1.531521242  | 0.12661942  | 0.254791943 | no |
| FOXJ3        | 0.084886911  | 1.531131091  | 0.126715781 | 0.254961975 | no |
| ZNF639       | -0.084865995 | -1.530751072 | 0.126809695 | 0.255127051 | no |
| LOC150381    | -0.08485948  | -1.53063271  | 0.126838957 | 0.255162036 | no |
| MAP1LC3C     | 0.084848839  | 1.530439391  | 0.126886762 | 0.255234313 | no |
| HSD17B7P2    | -0.084839636 | -1.530272191 | 0.126928119 | 0.255275212 | no |
| MAL          | -0.084839028 | -1.530261147 | 0.126930851 | 0.255275212 | no |
| ADH1B        | -0.084822578 | -1.529962269 | 0.127004806 | 0.255400046 | no |
| MAZ          | -0.084813028 | -1.529788773 | 0.127047752 | 0.255462504 | no |
| LONP1        | -0.084805671 | -1.529655109 | 0.127080846 | 0.255505142 | no |
| LOC728012    | 0.084796395  | 1.529486585  | 0.12712258  | 0.255558896 | no |
| ECHDC1       | 0.084794443  | 1.52945112   | 0.127131365 | 0.255558896 | no |
| PPP1R1C      | 0.084779328  | 1.529176515  | 0.127199396 | 0.255671738 | no |
| CORIN        | 0.084758024  | 1.528789477  | 0.127295331 | 0.255840639 | no |
| CLRN3        | 0.084749457  | 1.528633829  | 0.127333927 | 0.25589428  | no |
| IDH2         | -0.084743659 | -1.528528496 | 0.127360052 | 0.25592285  | no |
| FGF16        | 0.084720269  | 1.528103555  | 0.127465488 | 0.256110772 | no |
| LOC100133315 | -0.084710796 | -1.527931454 | 0.12750821  | 0.256172659 | no |
| SNORA4       | 0.084667893  | 1.527152035  | 0.127701828 | 0.256528986 | no |
| RGS14        | 0.084666207  | 1.527121402  | 0.127709442 | 0.256528986 | no |
| DST          | 0.084653818  | 1.526896329  | 0.127765398 | 0.2566174   | no |
| FBX015       | -0.084641712 | -1.5266764   | 0.127820094 | 0.256703266 | no |
| LINC00842    | -0.084637081 | -1.526592252 | 0.127841027 | 0.256721314 | no |
| CSNK1A1L     | -0.084628648 | -1.526439053 | 0.127879143 | 0.256773863 | no |
| RNF126       | -0.084623504 | -1.526345613 | 0.127902395 | 0.256796559 | no |
| NPHP3-ACAD11 | -0.084613052 | -1.526155735 | 0.127949656 | 0.256867451 | no |
| MED14        | 0.084596309  | 1.525851565  | 0.128025393 | 0.25699549  | no |
| MMP25        | 0.084592935  | 1.525790267  | 0.12804066  | 0.257002131 | no |
| ARHGAP17     | 0.084585569  | 1.525656454  | 0.128073993 | 0.257032653 | no |
| DDX19B       | -0.084584289 | -1.525633201 | 0.128079786 | 0.257032653 | no |

|              |              |              |             |             |    |
|--------------|--------------|--------------|-------------|-------------|----|
| GOLGA6L7P    | -0.084576846 | -1.525497976 | 0.128113479 | 0.257067306 | no |
| MAGEC2       | 0.08457519   | 1.525467885  | 0.128120977 | 0.257067306 | no |
| RGL2         | -0.084515857 | -1.52439002  | 0.128389798 | 0.257582632 | no |
| SLC13A1      | -0.084510704 | -1.524296401 | 0.128413168 | 0.257605469 | no |
| LOC100505768 | -0.084507053 | -1.52423007  | 0.128429727 | 0.257609251 | no |
| ASIP         | 0.084505003  | 1.524192824  | 0.128439027 | 0.257609251 | no |
| SRG7         | -0.084489307 | -1.523907695 | 0.128510233 | 0.257728016 | no |
| LPAR4        | -0.084471632 | -1.523586607 | 0.128590457 | 0.257864842 | no |
| MGC34034     | 0.084461987  | 1.523411381  | 0.128634254 | 0.25790849  | no |
| LIMS3        | 0.084461553  | 1.523403496  | 0.128636225 | 0.25790849  | no |
| CRSP8P       | -0.084457281 | -1.5233259   | 0.128655623 | 0.257923321 | no |
| PDCD6        | -0.08445074  | -1.523207082 | 0.128685332 | 0.25794695  | no |
| MIR5010      | -0.084449401 | -1.523182755 | 0.128691415 | 0.25794695  | no |
| CXCR1        | 0.084429437  | 1.522820076  | 0.128782132 | 0.25810471  | no |
| FCHO1        | -0.084417545 | -1.522604045 | 0.128836193 | 0.258188979 | no |
| BRS3         | -0.084386418 | -1.52203859  | 0.128977777 | 0.258448616 | no |
| CDHR2        | -0.084382135 | -1.521960796 | 0.128997265 | 0.258463568 | no |
| FTCD         | -0.084374344 | -1.521819258 | 0.129032728 | 0.258510521 | no |
| NFKBIA       | 0.084370847  | 1.521755732  | 0.129048647 | 0.258518315 | no |
| PIAS3        | 0.084364973  | 1.521649027  | 0.129075391 | 0.258547788 | no |
| CCL20        | 0.084355026  | 1.52146833   | 0.129120688 | 0.258614417 | no |
| PRELP        | -0.08434681  | -1.521319087 | 0.129158109 | 0.258637024 | no |
| ZNF577       | -0.084345322 | -1.52129205  | 0.12916489  | 0.258637024 | no |
| ERCC8        | -0.084344622 | -1.521279332 | 0.129168079 | 0.258637024 | no |
| CEP41        | 0.084336156  | 1.521125546  | 0.129206651 | 0.258668764 | no |
| LY6H         | -0.084335859 | -1.521120158 | 0.129208002 | 0.258668764 | no |
| DNAH10       | -0.084302387 | -1.520512111 | 0.129360599 | 0.258950134 | no |
| SLC24A2      | -0.084292415 | -1.520330974 | 0.129406085 | 0.25899448  | no |
| OR7E156P     | -0.084291776 | -1.520319355 | 0.129409003 | 0.25899448  | no |
| FAM203A      | 0.084289605  | 1.520279923  | 0.129418907 | 0.25899448  | no |
| CLEC18C      | 0.084282934  | 1.520158744  | 0.129449346 | 0.259031274 | no |
| SSTR5        | -0.084272887 | -1.519976231 | 0.129495201 | 0.259098908 | no |
| ZMAT1        | -0.084249005 | -1.519542404 | 0.12960425  | 0.259292956 | no |
| C19orf43     | -0.084244762 | -1.519465328 | 0.129623631 | 0.259307592 | no |
| RHCE         | 0.084234386  | 1.519276846  | 0.129671037 | 0.259378281 | no |
| SH2D1B       | 0.084229969  | 1.519196623  | 0.129691218 | 0.259394506 | no |
| ITPK1-AS1    | -0.084221796 | -1.519048145 | 0.129728576 | 0.259433828 | no |
| IQGAP2       | 0.084220385  | 1.519022531  | 0.129735022 | 0.259433828 | no |
| CENPV        | -0.084212119 | -1.51887237  | 0.129772813 | 0.259485256 | no |
| CYB5A        | 0.084206501  | 1.518770317  | 0.129798502 | 0.259493903 | no |
| MIR199B      | -0.084200661 | -1.518664235 | 0.129825209 | 0.259493903 | no |
| HELB         | 0.084200051  | 1.518653151  | 0.129828    | 0.259493903 | no |
| MSANTD3      | 0.084199429  | 1.518641855  | 0.129830844 | 0.259493903 | no |
| ZNF230       | 0.084197971  | 1.518615379  | 0.129837511 | 0.259493903 | no |
| LOC100128568 | -0.084168321 | -1.518076778 | 0.129973185 | 0.259726277 | no |
| SPANXA2-OT1  | 0.08416728   | 1.518057874  | 0.129977949 | 0.259726277 | no |
| LOC339666    | -0.084132301 | -1.51742248  | 0.130138153 | 0.260022225 | no |
| WDR88        | -0.084101478 | -1.516862587 | 0.130279448 | 0.260280341 | no |
| LOC284080    | 0.084083283  | 1.516532086  | 0.13036291  | 0.260422876 | no |
| SLC35E2      | -0.084078598 | -1.51644699  | 0.130384406 | 0.260441609 | no |
| FLJ42102     | -0.084071097 | -1.516310739 | 0.13041883  | 0.26048616  | no |

|              |              |              |             |             |    |
|--------------|--------------|--------------|-------------|-------------|----|
| SMCHD1       | -0.084060396 | -1.516116354 | 0.130467954 | 0.26056006  | no |
| MLST8        | -0.084042884 | -1.515798263 | 0.130548372 | 0.260696437 | no |
| DZIP1L       | 0.084022705  | 1.515431735  | 0.130641083 | 0.260857336 | no |
| EFNA5        | -0.084014536 | -1.515283353 | 0.13067863  | 0.260908066 | no |
| ZNF148       | -0.083989455 | -1.514827773 | 0.130793963 | 0.261114079 | no |
| MCU          | -0.083984002 | -1.514728722 | 0.130819049 | 0.261139902 | no |
| KLHL15       | -0.083953174 | -1.514168772 | 0.130960934 | 0.261373921 | no |
| HCG18        | -0.083951802 | -1.514143837 | 0.130967255 | 0.261373921 | no |
| TFB2M        | 0.083950604  | 1.514122093  | 0.130972768 | 0.261373921 | no |
| SNORA75      | -0.083939467 | -1.513919796 | 0.131024061 | 0.261452005 | no |
| PLCH1        | -0.0839317   | -1.513778724 | 0.131059839 | 0.261499118 | no |
| SNCA         | -0.083924763 | -1.51365272  | 0.131091803 | 0.261538612 | no |
| TOB1         | 0.083918615  | 1.51354105   | 0.131120135 | 0.261570855 | no |
| ZNF146       | -0.083908368 | -1.51335492  | 0.13116737  | 0.261640796 | no |
| BCAS2        | 0.083900523  | 1.513212425  | 0.13120354  | 0.261688656 | no |
| AAK1         | -0.083895694 | -1.513124718 | 0.131225807 | 0.26170878  | no |
| SBF2-AS1     | 0.083883049  | 1.51289503   | 0.131284134 | 0.261800808 | no |
| PRMT1        | -0.083877527 | -1.512794735 | 0.131309609 | 0.261827315 | no |
| ATP12A       | -0.083865681 | -1.512579561 | 0.131364276 | 0.261905235 | no |
| DCAF11       | -0.083863777 | -1.512544994 | 0.13137306  | 0.261905235 | no |
| LARP4B       | -0.083852526 | -1.512340632 | 0.131425    | 0.26198448  | no |
| YES1         | -0.083846277 | -1.51222712  | 0.131453857 | 0.2620177   | no |
| CILP         | 0.083828794  | 1.511909569  | 0.13153461  | 0.262154346 | no |
| SPINK1       | 0.083815552  | 1.511669064  | 0.131595796 | 0.262243494 | no |
| ABI1         | -0.083804557 | -1.511469352 | 0.131646621 | 0.262243494 | no |
| PTPRQ        | 0.083804144  | 1.511461859  | 0.131648528 | 0.262243494 | no |
| PLCD4        | -0.083803803 | -1.511455661 | 0.131650106 | 0.262243494 | no |
| MAPK9        | -0.083798649 | -1.511362054 | 0.131673934 | 0.262243494 | no |
| RAB27B       | -0.083796764 | -1.511327807 | 0.131682652 | 0.262243494 | no |
| NRDE2        | -0.083795339 | -1.511301927 | 0.131689241 | 0.262243494 | no |
| TOMM40L      | 0.083794231  | 1.511281799  | 0.131694366 | 0.262243494 | no |
| PPP1R10      | -0.083792867 | -1.51125703  | 0.131700672 | 0.262243494 | no |
| CHKB-CPT1B   | -0.083792717 | -1.51125431  | 0.131701365 | 0.262243494 | no |
| GJB2         | 0.083765384  | 1.510757844  | 0.131827818 | 0.262470969 | no |
| GPC1         | 0.083752532  | 1.510524417  | 0.131887306 | 0.262565086 | no |
| AFF2         | -0.083748947 | -1.510459311 | 0.131903902 | 0.262573801 | no |
| DDX20        | 0.083738736  | 1.510273834  | 0.13195119  | 0.262643607 | no |
| LOC389247    | 0.083705906  | 1.509677549  | 0.132103304 | 0.262922032 | no |
| TP53I3       | 0.083685675  | 1.509310099  | 0.132197109 | 0.263084366 | no |
| ZNF542       | 0.083678656  | 1.509182625  | 0.132229663 | 0.263124787 | no |
| DTHD1        | 0.083663593  | 1.508909033  | 0.132299555 | 0.26323949  | no |
| HSPD1        | -0.083659021 | -1.508826005 | 0.132320771 | 0.263257331 | no |
| RECK         | 0.083645924  | 1.50858813   | 0.132381569 | 0.263353911 | no |
| ZMAT4        | -0.083605321 | -1.507850685 | 0.13257019  | 0.263704735 | no |
| DUSP10       | 0.083591312  | 1.507596236  | 0.132635321 | 0.263809873 | no |
| SMAD5-AS1    | 0.083587926  | 1.507534749  | 0.132651063 | 0.263816769 | no |
| LOC100507351 | -0.083561983 | -1.507063567 | 0.132771747 | 0.264032352 | no |
| ERVK13-1     | -0.083555458 | -1.506945061 | 0.132802114 | 0.264068304 | no |
| C16orf82     | 0.083552606  | 1.506893254  | 0.132815391 | 0.264070271 | no |
| SETD2        | -0.083546084 | -1.506774804 | 0.13284575  | 0.2641062   | no |
| PHF10        | -0.083542503 | -1.506709777 | 0.13286242  | 0.264114907 | no |

|            |              |              |             |             |    |
|------------|--------------|--------------|-------------|-------------|----|
| HSPA4L     | 0.083525696  | 1.506404524  | 0.132940691 | 0.264234876 | no |
| MAGI2-AS2  | 0.083524265  | 1.506378524  | 0.13294736  | 0.264234876 | no |
| ZNF663     | -0.083515628 | -1.506221666 | 0.132987596 | 0.264290405 | no |
| C19orf25   | -0.083508909 | -1.506099635 | 0.133018906 | 0.264328183 | no |
| FAM134B    | 0.083505533  | 1.506038316  | 0.13303464  | 0.264335009 | no |
| GATM-AS1   | -0.083492493 | -1.505801485 | 0.133095426 | 0.264431339 | no |
| MYCT1      | 0.083457833  | 1.505172001  | 0.133257095 | 0.264728066 | no |
| C11orf83   | -0.083447044 | -1.504976068 | 0.133307447 | 0.264787875 | no |
| DPP8       | -0.083446103 | -1.504958967 | 0.133311842 | 0.264787875 | no |
| SYBU       | -0.083442004 | -1.504884526 | 0.133330977 | 0.264801407 | no |
| ELP4       | -0.083434744 | -1.504752669 | 0.133364875 | 0.264844256 | no |
| SLC20A1    | 0.083429364  | 1.504654968  | 0.133389997 | 0.264869669 | no |
| TACR1      | -0.083404561 | -1.5042045   | 0.133505873 | 0.26507527  | no |
| CYB5RL     | 0.08337743   | 1.503711768  | 0.133632711 | 0.265302595 | no |
| BMP6       | -0.083362762 | -1.503445393 | 0.13370132  | 0.265414286 | no |
| GP6        | 0.083354993  | 1.503304296  | 0.133737672 | 0.265461929 | no |
| RUFY1      | 0.083339178  | 1.503017076  | 0.133811696 | 0.265584333 | no |
| FEZF1-AS1  | 0.083332398  | 1.502893941  | 0.13384344  | 0.265622807 | no |
| SLC35A5    | -0.083304773 | -1.502392236 | 0.133972842 | 0.265855065 | no |
| G6PC2      | -0.083293848 | -1.502193835 | 0.134024041 | 0.265932109 | no |
| DDX11      | -0.083280196 | -1.501945901 | 0.134088045 | 0.266034543 | no |
| NUP205     | 0.083271953  | 1.501796197  | 0.134126702 | 0.266086674 | no |
| DIMT1      | -0.083253969 | -1.501469608 | 0.134211064 | 0.266215967 | no |
| CDC123     | -0.083252779 | -1.501447995 | 0.134216649 | 0.266215967 | no |
| LINC00472  | -0.083247365 | -1.501349673 | 0.134242056 | 0.266241788 | no |
| RSPH10B2   | -0.083236153 | -1.501146057 | 0.134294683 | 0.266321586 | no |
| N4BP2      | -0.083233256 | -1.501093437 | 0.134308286 | 0.266323987 | no |
| OSBPL9     | 0.083228688  | 1.501010477  | 0.134329734 | 0.266341943 | no |
| PIWIL2     | -0.083220105 | -1.500854609 | 0.134370039 | 0.26639728  | no |
| MED31      | 0.083213327  | 1.500731525  | 0.134401874 | 0.266435815 | no |
| RFT1       | 0.083179328  | 1.500114079  | 0.134561658 | 0.266724477 | no |
| SLC22A18AS | 0.083175926  | 1.500052305  | 0.134577652 | 0.266724477 | no |
| COX7C      | -0.083174423 | -1.500025007 | 0.13458472  | 0.266724477 | no |
| ECI1       | -0.083150786 | -1.49959575  | 0.134695906 | 0.266920214 | no |
| CCDC111    | 0.083120367  | 1.499043339  | 0.134839096 | 0.26717933  | no |
| FOXN3      | -0.083113522 | -1.498919042 | 0.134871331 | 0.267218566 | no |
| TMEM74B    | -0.083093706 | -1.498559172 | 0.134964694 | 0.267378894 | no |
| CTXN1      | -0.083079178 | -1.498295356 | 0.135033169 | 0.267489891 | no |
| FBXW9      | 0.08305674   | 1.497887883  | 0.135138983 | 0.267674829 | no |
| MINK1      | -0.083037001 | -1.497529431 | 0.135232121 | 0.267834625 | no |
| ATP5L      | -0.083018701 | -1.497197102 | 0.135318516 | 0.267981038 | no |
| SLC48A1    | -0.083004099 | -1.496931937 | 0.135387481 | 0.26809291  | no |
| ELP2       | -0.083000655 | -1.496869393 | 0.135403751 | 0.268100426 | no |
| ELMO2      | -0.082990948 | -1.496693115 | 0.135449618 | 0.268166534 | no |
| PDZD2      | -0.082964591 | -1.496214495 | 0.135574212 | 0.268388485 | no |
| ADD2       | -0.08295993  | -1.496129854 | 0.135596255 | 0.268407398 | no |
| LOC374443  | 0.08295218   | 1.495989119  | 0.135632913 | 0.268455234 | no |
| QDPR       | -0.082947328 | -1.495901005 | 0.135655868 | 0.268475942 | no |
| LMO7       | -0.082937667 | -1.495725568 | 0.135701581 | 0.268494814 | no |
| GSK3A      | -0.082935148 | -1.495679829 | 0.135713502 | 0.268494814 | no |
| DISC1      | -0.082935119 | -1.4956793   | 0.135713639 | 0.268494814 | no |

|            |              |              |             |             |    |
|------------|--------------|--------------|-------------|-------------|----|
| EGLN3      | -0.082934752 | -1.495672634 | 0.135715377 | 0.268494814 | no |
| MAP2K7     | -0.082926499 | -1.495522769 | 0.135754439 | 0.268547372 | no |
| EPHA4      | -0.082898835 | -1.495020406 | 0.135885445 | 0.268781785 | no |
| SGPP2      | -0.082875392 | -1.494594705 | 0.135996536 | 0.268971022 | no |
| HIST2H2BC  | -0.082873364 | -1.494557888 | 0.136006147 | 0.268971022 | no |
| VENTXP7    | -0.082864936 | -1.494404833 | 0.136046107 | 0.269025294 | no |
| SEMA5A     | -0.082858568 | -1.494289199 | 0.136076304 | 0.269060249 | no |
| KRT6C      | 0.082853819  | 1.494202975  | 0.136098824 | 0.269066047 | no |
| FAM72A     | 0.082851391  | 1.494158873  | 0.136110343 | 0.269066047 | no |
| TRIM51     | -0.08285003  | -1.49413417  | 0.136116796 | 0.269066047 | no |
| CES5AP1    | -0.082829933 | -1.493769225 | 0.136212153 | 0.269229779 | no |
| LRIG2      | -0.082819001 | -1.493570717 | 0.136264043 | 0.269307574 | no |
| HMGXB3     | 0.082815374  | 1.493504855  | 0.136281263 | 0.269316839 | no |
| SLC44A3    | 0.082799792  | 1.493221909  | 0.13635526  | 0.269438294 | no |
| MAP4K4     | -0.082772091 | -1.492718903 | 0.136486883 | 0.269673587 | no |
| FLJ35390   | -0.082765822 | -1.492605053 | 0.136516688 | 0.269707681 | no |
| STAG3L3    | -0.082747906 | -1.492279742 | 0.136601881 | 0.269851183 | no |
| CAPS2      | 0.082740708  | 1.492149036  | 0.136636121 | 0.269894015 | no |
| SCN9A      | 0.08273766   | 1.492093693  | 0.136650622 | 0.26989785  | no |
| STYXL1     | 0.082732717  | 1.492003924  | 0.136674144 | 0.269919503 | no |
| ZNF583     | -0.082708292 | -1.491560414 | 0.136790404 | 0.270124283 | no |
| EIF2S1     | -0.08269317  | -1.491285831 | 0.136862421 | 0.270241665 | no |
| MSTN       | -0.08268859  | -1.491202655 | 0.136884242 | 0.270259921 | no |
| MRPL13     | 0.082673986  | 1.490937474  | 0.136953829 | 0.270354122 | no |
| NDUFAF5    | -0.08267109  | -1.490884898 | 0.136967629 | 0.270354122 | no |
| RPS10P7    | 0.082670657  | 1.490877034  | 0.136969693 | 0.270354122 | no |
| IGF2BP1    | 0.082662491  | 1.490728761  | 0.137008617 | 0.270406116 | no |
| VPS13A-AS1 | -0.082626447 | -1.490074271 | 0.137180535 | 0.270720559 | no |
| CYP11A1    | 0.082609241  | 1.489761844  | 0.137262661 | 0.270857759 | no |
| SUMO3      | 0.082592788  | 1.489463097  | 0.137341226 | 0.270987715 | no |
| SMO        | 0.082590169  | 1.489415534  | 0.137353738 | 0.270987715 | no |
| CNST       | -0.082559516 | -1.488858965 | 0.137500209 | 0.271251789 | no |
| 37681      | 0.08254853   | 1.488659472  | 0.137552739 | 0.27133051  | no |
| ALKBH7     | -0.082533651 | -1.488389317 | 0.137623899 | 0.271424034 | no |
| CPA5       | 0.082533335  | 1.488383581  | 0.137625411 | 0.271424034 | no |
| SYNRG      | -0.08252216  | -1.488180675 | 0.137678877 | 0.271504564 | no |
| NGEF       | -0.082509604 | -1.487952681 | 0.137738973 | 0.271598152 | no |
| GLTSCR2    | -0.082503514 | -1.487842116 | 0.137768124 | 0.27163071  | no |
| FOXQ1      | -0.082495279 | -1.487692588 | 0.137807554 | 0.271683529 | no |
| BFSP1      | 0.082486799  | 1.487538612  | 0.137848168 | 0.271738669 | no |
| KRT33B     | -0.082468455 | -1.487205537 | 0.137936052 | 0.271886975 | no |
| EGFL8      | -0.082457137 | -1.487000035 | 0.137990297 | 0.271968954 | no |
| SNX24      | 0.082454314  | 1.486948781  | 0.138003829 | 0.271970682 | no |
| STRN4      | -0.082440929 | -1.486705744 | 0.138068008 | 0.272072213 | no |
| SLED1      | 0.082428493  | 1.48647994   | 0.138127657 | 0.2721648   | no |
| LINC00689  | -0.082423924 | -1.486396993 | 0.138149573 | 0.272181863 | no |
| HIGD1C     | -0.082420805 | -1.486340352 | 0.13816454  | 0.272181863 | no |
| KLF4       | 0.082418769  | 1.486303379  | 0.138174311 | 0.272181863 | no |
| GJC1       | 0.082393499  | 1.485844557  | 0.138295608 | 0.272395831 | no |
| TENC1      | 0.08238657   | 1.485718752  | 0.138328881 | 0.27241479  | no |
| PCMTD2     | -0.082386215 | -1.48571231  | 0.138330585 | 0.27241479  | no |

|             |              |              |             |             |    |
|-------------|--------------|--------------|-------------|-------------|----|
| RANBP3      | -0.08238302  | -1.485654296 | 0.138345931 | 0.272420047 | no |
| BYSL        | -0.082371676 | -1.485448322 | 0.138400425 | 0.272502386 | no |
| GDE1        | 0.082361122  | 1.485256699  | 0.138451138 | 0.272577263 | no |
| HSFX2       | -0.082343685 | -1.484940109 | 0.138534954 | 0.272717295 | no |
| KLHL31      | -0.082338074 | -1.484838234 | 0.138561934 | 0.272745422 | no |
| LRRC8B      | -0.082319569 | -1.484502237 | 0.138650945 | 0.272895636 | no |
| CTNNA2      | -0.082304427 | -1.484227311 | 0.13872381  | 0.273014047 | no |
| CCDC41      | -0.082298779 | -1.484124765 | 0.138750996 | 0.273032616 | no |
| DENND4B     | -0.082297188 | -1.484095879 | 0.138758654 | 0.273032616 | no |
| ARL16       | -0.082289141 | -1.483949787 | 0.138797393 | 0.273083839 | no |
| CLEC19A     | 0.082282756  | 1.483833853  | 0.138828141 | 0.273100889 | no |
| C1QL4       | -0.082282064 | -1.483821288 | 0.138831474 | 0.273100889 | no |
| ANKRD52     | 0.082278832  | 1.483762614  | 0.138847038 | 0.273106506 | no |
| SLC16A6     | 0.082257872  | 1.483382061  | 0.138948016 | 0.273280115 | no |
| ISCA2       | 0.082226943  | 1.482820503  | 0.139097127 | 0.273548348 | no |
| TBX2        | 0.082215555  | 1.482613749  | 0.139152057 | 0.273631336 | no |
| HSPA13      | -0.082206144 | -1.482442877 | 0.139197468 | 0.273695588 | no |
| IRF2BP1     | -0.082194762 | -1.482236231 | 0.1392524   | 0.27377855  | no |
| ANKRD32     | 0.082177866  | 1.481929466  | 0.139333978 | 0.273913879 | no |
| FAM135B     | -0.082169244 | -1.481772926 | 0.139375621 | 0.273970683 | no |
| KCNJ6       | -0.082154474 | -1.481504768 | 0.139446979 | 0.274085882 | no |
| ADAMTS9-AS2 | 0.082142807  | 1.481292953  | 0.139503364 | 0.274171633 | no |
| ANKRD26P1   | 0.082133549  | 1.481124859  | 0.139548123 | 0.27423452  | no |
| ASIC3       | -0.082122698 | -1.480927845 | 0.139600597 | 0.274312556 | no |
| CCDC105     | -0.082117343 | -1.480830631 | 0.139626495 | 0.274338362 | no |
| GRIK1-AS1   | -0.08208873  | -1.480311146 | 0.13976495  | 0.274585296 | no |
| ZC3HAV1L    | 0.082083523  | 1.480216616  | 0.139790157 | 0.274609712 | no |
| CCT6P1      | -0.082074425 | -1.480051444 | 0.139834207 | 0.27467114  | no |
| ZNF77       | -0.082069249 | -1.479957461 | 0.139859277 | 0.27467323  | no |
| PTPRK       | -0.082068928 | -1.47995163  | 0.139860832 | 0.27467323  | no |
| SNF8        | 0.082062893  | 1.479842061  | 0.139890064 | 0.274705534 | no |
| MRAP2       | -0.082021655 | -1.479093392 | 0.140089928 | 0.275072876 | no |
| CTSG        | 0.081981989  | 1.478373249  | 0.140282384 | 0.275425608 | no |
| NBPF3       | 0.081973587  | 1.478220704  | 0.140323177 | 0.275480534 | no |
| PPAPDC1A    | 0.081970676  | 1.478167859  | 0.140337311 | 0.275483116 | no |
| TMEM14A     | -0.081950168 | -1.477795536 | 0.140436924 | 0.275653478 | no |
| PROSER1     | -0.081942508 | -1.47765648  | 0.140474141 | 0.275701349 | no |
| ENPP3       | -0.081910828 | -1.477081338 | 0.140628156 | 0.275978421 | no |
| MGC45922    | -0.081899155 | -1.476869416 | 0.140684938 | 0.276064646 | no |
| PROB1       | 0.081893188  | 1.476761096  | 0.140713968 | 0.276096402 | no |
| ILVBL       | -0.081889184 | -1.476688405 | 0.140733452 | 0.276109423 | no |
| KLRC4       | -0.081855366 | -1.476074459 | 0.140898097 | 0.276407211 | no |
| FAM208A     | 0.08182748   | 1.475568205  | 0.141033973 | 0.27657626  | no |
| IP6K2       | -0.081826528 | -1.475550914 | 0.141038615 | 0.27657626  | no |
| GRAMD3      | -0.081824917 | -1.475521667 | 0.141046468 | 0.27657626  | no |
| ZNF124      | 0.081823922  | 1.475503605  | 0.141051318 | 0.27657626  | no |
| OTOF        | -0.081822544 | -1.475478592 | 0.141058035 | 0.27657626  | no |
| UPF3B       | -0.081821836 | -1.475465742 | 0.141061486 | 0.27657626  | no |
| SCARNA8     | 0.081816364  | 1.475366405  | 0.141088163 | 0.276603331 | no |
| MIRLET7BHG  | -0.081795917 | -1.47499521  | 0.141187884 | 0.276773585 | no |
| FGL1        | 0.081787921  | 1.474850047  | 0.141226896 | 0.276824718 | no |



|              |              |              |             |             |    |
|--------------|--------------|--------------|-------------|-------------|----|
| PITX3        | -0.081785291 | -1.474802303 | 0.14123973  | 0.276824718 | no |
| KIAA0368     | 0.081775532  | 1.474625126  | 0.14128736  | 0.276892282 | no |
| MIR769       | -0.081730599 | -1.473809422 | 0.141506808 | 0.277297604 | no |
| ATP6V1D      | -0.081724393 | -1.47369677  | 0.141537136 | 0.277331745 | no |
| C2orf76      | -0.081690481 | -1.473081141 | 0.141702959 | 0.277631351 | no |
| ARL5B        | -0.081683709 | -1.472958198 | 0.141736093 | 0.277658529 | no |
| RNF6         | 0.081682365  | 1.472933794  | 0.14174267  | 0.277658529 | no |
| LOC399815    | -0.081667218 | -1.472658822 | 0.1418168   | 0.277772462 | no |
| DOHH         | -0.081665199 | -1.472622174 | 0.141826682 | 0.277772462 | no |
| GRIK4        | -0.081642867 | -1.472216767 | 0.141936036 | 0.277961305 | no |
| CCDC115      | -0.08161928  | -1.471788585 | 0.142051605 | 0.278162282 | no |
| MTCH2        | 0.081596277  | 1.47137101   | 0.14216438  | 0.278357753 | no |
| SERINC3      | 0.081583357  | 1.471136467  | 0.142227754 | 0.278436677 | no |
| RFWD3        | 0.081582776  | 1.471125932  | 0.142230601 | 0.278436677 | no |
| BRF2         | -0.081579229 | -1.471061534 | 0.142248006 | 0.278445386 | no |
| ZNF671       | -0.081573508 | -1.470957676 | 0.142276078 | 0.278474972 | no |
| EXTL1        | -0.081551367 | -1.470555757 | 0.142384756 | 0.278662308 | no |
| ZDHHC13      | 0.081543053  | 1.470404824  | 0.142425585 | 0.278716832 | no |
| CPSF4        | 0.081540353  | 1.470355818  | 0.142438843 | 0.278717398 | no |
| ENC1         | -0.081527313 | -1.470119104 | 0.142502899 | 0.278817353 | no |
| FMN1         | 0.081521174  | 1.470007656  | 0.142533065 | 0.278836913 | no |
| LOC727896    | -0.081518589 | -1.469960734 | 0.142545767 | 0.278836913 | no |
| CTNBL1       | -0.081516448 | -1.469921881 | 0.142556285 | 0.278836913 | no |
| QRFP         | 0.081514717  | 1.46989045   | 0.142564795 | 0.278836913 | no |
| FAM189A2     | -0.081494395 | -1.469521552 | 0.142664698 | 0.278988513 | no |
| HELLS        | 0.081493669  | 1.46950837   | 0.142668269 | 0.278988513 | no |
| KIRREL3-AS2  | -0.081458254 | -1.468865498 | 0.1428425   | 0.27930381  | no |
| KRTAP5-1     | -0.081451458 | -1.468742135 | 0.142875953 | 0.279343805 | no |
| LOC100134259 | 0.08143881   | 1.468512532  | 0.142938231 | 0.279440146 | no |
| C22orf26     | 0.08143372   | 1.468420144  | 0.142963296 | 0.27944489  | no |
| BBS7         | -0.081433037 | -1.468407734 | 0.142966664 | 0.27944489  | no |
| LYSMD4       | -0.08142609  | -1.468281646 | 0.143000878 | 0.279486347 | no |
| FLJ33630     | 0.081419496  | 1.46816194   | 0.143033367 | 0.27950025  | no |
| MECR         | 0.0814176    | 1.46812752   | 0.14304271  | 0.27950025  | no |
| PMF1-BGLAP   | -0.081416727 | -1.468111685 | 0.143047008 | 0.27950025  | no |
| PHF8         | 0.081362439  | 1.467126229  | 0.1433147   | 0.279997838 | no |
| LEPREL4      | 0.081331487  | 1.466564382  | 0.143467495 | 0.280245612 | no |
| LSR          | -0.081331465 | -1.466563991 | 0.143467601 | 0.280245612 | no |
| MRPL44       | -0.081326453 | -1.466473004 | 0.143492357 | 0.280268494 | no |
| LINC00583    | 0.081300473  | 1.466001415  | 0.14362072  | 0.28049372  | no |
| TMEM229B     | 0.081295365  | 1.46590869   | 0.143645969 | 0.28051754  | no |
| ZNF569       | -0.08127833  | -1.465599484 | 0.143730192 | 0.280656511 | no |
| SRCAP        | -0.081248774 | -1.465062996 | 0.143876414 | 0.280916508 | no |
| HSPA4        | 0.081239567  | 1.464895866  | 0.143921989 | 0.280979965 | no |
| CYCSP52      | 0.081198296  | 1.464146746  | 0.144126405 | 0.281353489 | no |
| WDR45        | 0.081185003  | 1.46390546   | 0.144192293 | 0.281456547 | no |
| SPOP         | -0.081176208 | -1.463745819 | 0.1442359   | 0.281516095 | no |
| RABEPK       | -0.081171692 | -1.463663839 | 0.144258297 | 0.281534241 | no |
| TMEM86B      | 0.081164073  | 1.46352555   | 0.144296083 | 0.281582414 | no |
| CHD1         | 0.08116113   | 1.463472118  | 0.144310686 | 0.281585341 | no |
| UBR7         | -0.081153299 | -1.463329982 | 0.144349534 | 0.281635573 | no |

|              |              |              |             |             |    |
|--------------|--------------|--------------|-------------|-------------|----|
| ANXA2R       | 0.081133306  | 1.462967092  | 0.144448756 | 0.281800309 | no |
| LOC152578    | -0.081131003 | -1.462925277 | 0.144460193 | 0.281800309 | no |
| FARP1        | -0.081123552 | -1.462790038 | 0.144497186 | 0.281846889 | no |
| PAH          | -0.081106554 | -1.462481506 | 0.144581608 | 0.281973417 | no |
| RASGRP1      | -0.081105208 | -1.462457075 | 0.144588295 | 0.281973417 | no |
| PER2         | -0.08109994  | -1.462361464 | 0.144614465 | 0.281989185 | no |
| LOC154872    | 0.081098298  | 1.462331663  | 0.144622623 | 0.281989185 | no |
| DHRS4-AS1    | -0.081093716 | -1.462248483 | 0.144645395 | 0.282008    | no |
| C4orf36      | 0.081018789  | 1.460888507  | 0.1450181   | 0.282708997 | no |
| MAGEC1       | 0.08100504   | 1.460638953  | 0.145086571 | 0.282816824 | no |
| EFCAB12      | 0.080997073  | 1.460494351  | 0.145126257 | 0.282868528 | no |
| STX16-NPEPL1 | -0.080959552 | -1.459813326 | 0.145313278 | 0.283207369 | no |
| EIF3M        | 0.080928904  | 1.45925706   | 0.145466176 | 0.283436273 | no |
| MGA          | -0.080926235 | -1.459208615 | 0.145479498 | 0.283436273 | no |
| KCNQ4        | 0.08092558   | 1.459196722  | 0.145482768 | 0.283436273 | no |
| ESX1         | -0.080925106 | -1.459188119 | 0.145485134 | 0.283436273 | no |
| FAM172A      | -0.080921512 | -1.459122891 | 0.145503073 | 0.283436273 | no |
| BEST3        | -0.080920153 | -1.459098215 | 0.14550986  | 0.283436273 | no |
| RELT         | 0.080906042  | 1.458842108  | 0.145580312 | 0.283547806 | no |
| MRAS         | -0.080898748 | -1.458709721 | 0.145616741 | 0.283593057 | no |
| MYB          | -0.080882143 | -1.458408341 | 0.145699697 | 0.283728905 | no |
| OR13J1       | -0.080876993 | -1.458314855 | 0.145725437 | 0.283753318 | no |
| C12orf65     | -0.080848366 | -1.457795292 | 0.145868554 | 0.28400626  | no |
| IL17RB       | 0.08084369   | 1.457710413  | 0.145891945 | 0.284026071 | no |
| B4GALT2      | -0.080835546 | -1.457562603 | 0.145932685 | 0.284077907 | no |
| ST5          | -0.080833083 | -1.457517899 | 0.145945008 | 0.284077907 | no |
| KDSR         | 0.080828769  | 1.457439596  | 0.145966595 | 0.284094195 | no |
| DEXI         | -0.080808257 | -1.457067315 | 0.146069262 | 0.284262015 | no |
| LOC145845    | 0.080805165  | 1.457011191  | 0.146084745 | 0.284262015 | no |
| VWA7         | -0.080802106 | -1.456955679 | 0.14610006  | 0.284262015 | no |
| MID1         | 0.080800974  | 1.456935131  | 0.146105729 | 0.284262015 | no |
| TTC21A       | 0.080789254  | 1.456722425  | 0.146164425 | 0.284349132 | no |
| IDH1-AS1     | -0.080786751 | -1.456676981 | 0.146176967 | 0.284349132 | no |
| APOC4        | 0.080756749  | 1.456132474  | 0.146327315 | 0.284615833 | no |
| SNORA71D     | -0.080718749 | -1.45544279  | 0.14651792  | 0.28496078  | no |
| TCEAL4       | -0.080715955 | -1.45539209  | 0.146531939 | 0.284962257 | no |
| FAM227A      | -0.080704247 | -1.455179595 | 0.146590708 | 0.285050751 | no |
| WRAP73       | 0.080696846  | 1.455045276  | 0.146627865 | 0.285097209 | no |
| CHDH         | -0.080689251 | -1.45490742  | 0.146666009 | 0.285145576 | no |
| POSTN        | 0.080675458  | 1.454657093  | 0.146735291 | 0.285232191 | no |
| LOC201617    | -0.080675097 | -1.454650544 | 0.146737104 | 0.285232191 | no |
| TSHB         | 0.080670914  | 1.454574617  | 0.146758124 | 0.285247249 | no |
| PPP1R27      | -0.080661129 | -1.454397031 | 0.146807295 | 0.285317017 | no |
| FAF2         | 0.080654656  | 1.454279561  | 0.146839828 | 0.285354439 | no |
| BCAT1        | 0.080650323  | 1.454200923  | 0.14686161  | 0.285370963 | no |
| OR52I1       | -0.080641279 | -1.454036781 | 0.146907082 | 0.285433515 | no |
| MAP2K5       | 0.080636409  | 1.453948389  | 0.146931575 | 0.285442114 | no |
| ANKRD65      | 0.080635117  | 1.453924941  | 0.146938072 | 0.285442114 | no |
| ERV3-1       | 0.080617997  | 1.45361423   | 0.147024193 | 0.285583599 | no |
| ANKRD39      | -0.080612981 | -1.453523202 | 0.147049432 | 0.285606808 | no |
| TXLNG        | -0.080607635 | -1.453426185 | 0.147076333 | 0.285633244 | no |

|              |              |              |             |             |    |
|--------------|--------------|--------------|-------------|-------------|----|
| TMEM132C     | -0.08060206  | -1.453324991 | 0.147104398 | 0.28565329  | no |
| KPNA3        | -0.080597702 | -1.453245914 | 0.147126331 | 0.28565329  | no |
| SYNE1        | -0.080597663 | -1.453245197 | 0.14712653  | 0.28565329  | no |
| SLC35E1      | 0.08058573   | 1.453028624  | 0.147186614 | 0.28574413  | no |
| DHRS9        | 0.080582427  | 1.452968678  | 0.147203248 | 0.28575061  | no |
| LINC00538    | -0.080563005 | -1.452616202 | 0.147301084 | 0.285887173 | no |
| FNDC3A       | -0.080560757 | -1.452575409 | 0.14731241  | 0.285887173 | no |
| RP9P         | -0.08056054  | -1.452571462 | 0.147313506 | 0.285887173 | no |
| ANKRD17      | 0.080503134  | 1.45152963   | 0.147602995 | 0.286413718 | no |
| NTSR1        | -0.080500399 | -1.451479993 | 0.147616798 | 0.286413718 | no |
| ERMN         | -0.080498613 | -1.451447595 | 0.147625808 | 0.286413718 | no |
| RPPH1        | -0.080496171 | -1.451403271 | 0.147638136 | 0.286413718 | no |
| SLC1A3       | -0.080488758 | -1.451268727 | 0.147675559 | 0.286460461 | no |
| LOC349196    | -0.080482689 | -1.451158596 | 0.147706198 | 0.286494034 | no |
| POU3F1       | -0.080478823 | -1.451088436 | 0.147725719 | 0.28650604  | no |
| KIAA1586     | -0.080448974 | -1.450546719 | 0.147876512 | 0.286772616 | no |
| PCGF5        | 0.080442699  | 1.45043285   | 0.147908224 | 0.286808233 | no |
| C14orf39     | -0.080433636 | -1.450268371 | 0.14795404  | 0.286859638 | no |
| RAB40B       | -0.080432174 | -1.450241844 | 0.14796143  | 0.286859638 | no |
| CBFA2T2      | -0.080427346 | -1.450154219 | 0.147985843 | 0.286881089 | no |
| PANX1        | 0.080404647  | 1.449742281  | 0.148100655 | 0.287035452 | no |
| PROSC        | 0.08040464   | 1.449742162  | 0.148100688 | 0.287035452 | no |
| MLL4         | -0.080403682 | -1.449724765 | 0.148105538 | 0.287035452 | no |
| EFTUD1P1     | -0.080396148 | -1.449588036 | 0.148143663 | 0.287058381 | no |
| BMS1         | -0.080396064 | -1.449586526 | 0.148144084 | 0.287058381 | no |
| CHRM5        | -0.080392983 | -1.449530607 | 0.148159677 | 0.287062714 | no |
| RNF25        | 0.08038276   | 1.44934508   | 0.148211424 | 0.287137088 | no |
| PVT1         | 0.080374274  | 1.449191073  | 0.14825439  | 0.287194438 | no |
| QTRTD1       | 0.080369349  | 1.449101695  | 0.14827933  | 0.287216861 | no |
| LOC100190940 | -0.080329677 | -1.448381749 | 0.148480337 | 0.287580292 | no |
| EMD          | 0.080313161  | 1.448082029  | 0.148564079 | 0.287716557 | no |
| MRPS34       | -0.080309777 | -1.448020603 | 0.148581246 | 0.287723875 | no |
| SNORA38      | -0.080299797 | -1.447839499 | 0.14863187  | 0.287795974 | no |
| LCE3B        | -0.080293509 | -1.44772538  | 0.148663775 | 0.28783182  | no |
| ART5         | 0.080290755  | 1.447675402  | 0.14867775  | 0.287832946 | no |
| BTG4         | 0.08025678   | 1.447058844  | 0.148850234 | 0.288129982 | no |
| DEF8         | -0.080255251 | -1.44703111  | 0.148857996 | 0.288129982 | no |
| LOC440896    | -0.080245526 | -1.446854632 | 0.148907396 | 0.288199644 | no |
| KIF19        | -0.080236496 | -1.446690752 | 0.148953281 | 0.288262492 | no |
| PDGFA        | 0.080229843  | 1.446570014  | 0.148987094 | 0.288301093 | no |
| AUNIP        | -0.080227292 | -1.446523728 | 0.149000058 | 0.288301093 | no |
| POLD2        | -0.080217991 | -1.446354938 | 0.149047341 | 0.288366618 | no |
| USP44        | -0.080211683 | -1.446240477 | 0.149079411 | 0.288402702 | no |
| PLGLB2       | 0.080208085  | 1.446175184  | 0.149097707 | 0.288412135 | no |
| FBX028       | -0.080190374 | -1.445853777 | 0.149187797 | 0.28855351  | no |
| GOLGA6L4     | -0.080188438 | -1.445818648 | 0.149197646 | 0.28855351  | no |
| ADCYAP1      | -0.080180731 | -1.445678781 | 0.149236865 | 0.28860339  | no |
| JKAMP        | 0.080165573  | 1.445403717  | 0.149314018 | 0.288726612 | no |
| CA14         | -0.080151964 | -1.445156763 | 0.149383312 | 0.288834616 | no |
| ZNF890P      | -0.080141396 | -1.444964984 | 0.149437141 | 0.288912702 | no |
| LIMS2        | -0.080136077 | -1.444868448 | 0.149464243 | 0.288939106 | no |

|              |              |              |             |             |    |
|--------------|--------------|--------------|-------------|-------------|----|
| MOSPD3       | -0.080113306 | -1.444455237 | 0.149580291 | 0.289137438 | no |
| USP39        | 0.080107784  | 1.44435503   | 0.149608444 | 0.289165849 | no |
| LOC100505716 | -0.080101956 | -1.444249267 | 0.149638162 | 0.28919728  | no |
| B3GALT6      | 0.080093604  | 1.444097707  | 0.149680757 | 0.289253588 | no |
| HCG27        | 0.080085269  | 1.443946467  | 0.149723271 | 0.289263748 | no |
| FAM19A4      | -0.080082832 | -1.443902244 | 0.149735704 | 0.289263748 | no |
| STON1-GTF2A1 | 0.080082259  | 1.443891852  | 0.149738626 | 0.289263748 | no |
| ASF1B        | 0.080082019  | 1.443887485  | 0.149739854 | 0.289263748 | no |
| ELOVL2-AS1   | -0.080069406 | -1.44365861  | 0.149804215 | 0.289362069 | no |
| LOC286059    | 0.080053421  | 1.443368529  | 0.149885817 | 0.289493673 | no |
| NKX3-2       | -0.080045391 | -1.443222815 | 0.149926821 | 0.289546846 | no |
| TP53I11      | 0.080040562  | 1.443135198  | 0.14995148  | 0.289568448 | no |
| WDR92        | 0.080020398  | 1.442769295  | 0.150054495 | 0.289741344 | no |
| FSD2         | 0.07998335   | 1.442097018  | 0.150243907 | 0.290081018 | no |
| RHOT2        | -0.079957357 | -1.441625345 | 0.150376909 | 0.290311727 | no |
| RALGDS       | -0.079949864 | -1.441489381 | 0.150415265 | 0.290359692 | no |
| LMX1A        | 0.079935835  | 1.441234812  | 0.150487099 | 0.290466126 | no |
| LOC400685    | -0.079933818 | -1.4411982   | 0.150497432 | 0.290466126 | no |
| MMP1         | 0.079922544  | 1.440993641  | 0.150555177 | 0.290520223 | no |
| PITRM1-AS1   | -0.079922472 | -1.44099233  | 0.150555547 | 0.290520223 | no |
| GOLGA8S      | -0.079920429 | -1.440955253 | 0.150566016 | 0.290520223 | no |
| MIR210HG     | 0.079914081  | 1.440840062  | 0.150598542 | 0.290535529 | no |
| EDIL3        | -0.079913604 | -1.440831406 | 0.150600986 | 0.290535529 | no |
| ABCB5        | 0.079899987  | 1.440584317  | 0.150670776 | 0.290644075 | no |
| LOC100507412 | 0.07987604   | 1.44014979   | 0.150793566 | 0.29084349  | no |
| TBCB         | -0.079874548 | -1.440122716 | 0.150801219 | 0.29084349  | no |
| ZC3H12C      | -0.079864523 | -1.439940804 | 0.15085265  | 0.290916574 | no |
| CHM          | 0.079861804  | 1.439891464  | 0.150866601 | 0.290917374 | no |
| CRYGS        | 0.079857302  | 1.439809775  | 0.150889702 | 0.290924418 | no |
| ZBTB33       | -0.079855816 | -1.439782811 | 0.150897328 | 0.290924418 | no |
| DNAJC9-AS1   | -0.079833571 | -1.439379175 | 0.151011518 | 0.291118456 | no |
| C2orf83      | -0.079826555 | -1.439251853 | 0.151047552 | 0.291161803 | no |
| SIDT2        | 0.079823141  | 1.439189914  | 0.151065084 | 0.291169481 | no |
| GTF3C5       | -0.07980823  | -1.438919353 | 0.151141684 | 0.291291    | no |
| PPP1R35      | 0.079783877  | 1.438477459  | 0.151266856 | 0.291506097 | no |
| TEAD1        | -0.079779968 | -1.438406527 | 0.151286956 | 0.291518691 | no |
| PSMC3        | -0.079764364 | -1.438123395 | 0.151367206 | 0.291647178 | no |
| CNFN         | 0.079759561  | 1.438036246  | 0.151391914 | 0.291648623 | no |
| HAPLN2       | -0.079758943 | -1.438025017 | 0.151395098 | 0.291648623 | no |
| CCL25        | 0.07975047   | 1.437871275  | 0.151438694 | 0.291706459 | no |
| NAPEPLD      | -0.079740911 | -1.437697841 | 0.151487885 | 0.291761101 | no |
| ARFIP2       | -0.079739682 | -1.437675535 | 0.151494213 | 0.291761101 | no |
| COPS3        | -0.07972689  | -1.437443426 | 0.151560068 | 0.291861776 | no |
| LOC100506050 | -0.079721993 | -1.437354575 | 0.151585283 | 0.291884178 | no |
| MEPCE        | -0.079674876 | -1.436499636 | 0.15182807  | 0.292325484 | no |
| GAMT         | -0.079672142 | -1.436450022 | 0.151842168 | 0.292326439 | no |
| GNG12-AS1    | 0.079659595  | 1.436222377  | 0.15190687  | 0.292424807 | no |
| SRP14        | 0.079643853  | 1.435936745  | 0.151988083 | 0.292554939 | no |
| PPP2R2B-IT1  | -0.079634458 | -1.435766277 | 0.152036568 | 0.292622056 | no |
| DGAT1        | -0.079625932 | -1.435611567 | 0.15208058  | 0.292680554 | no |
| CYP2F1       | -0.079590989 | -1.434977555 | 0.152261049 | 0.292996804 | no |

|              |              |              |             |             |    |
|--------------|--------------|--------------|-------------|-------------|----|
| PRODH        | -0.079586512 | -1.434896313 | 0.152284186 | 0.292996804 | no |
| TOR2A        | -0.079586198 | -1.434890619 | 0.152285808 | 0.292996804 | no |
| LOC100129213 | -0.079551475 | -1.434260599 | 0.152465325 | 0.293293857 | no |
| PCDHGB5      | -0.079551055 | -1.434252981 | 0.152467497 | 0.293293857 | no |
| TPRKB        | -0.079545984 | -1.434160971 | 0.152493728 | 0.293318062 | no |
| GCN1L1       | -0.079520615 | -1.433700662 | 0.152625009 | 0.293544305 | no |
| TSPAN13      | -0.079507144 | -1.433456249 | 0.152694751 | 0.293652161 | no |
| BMPR1B       | -0.079501756 | -1.433358496 | 0.152722651 | 0.293657437 | no |
| GNRHR        | -0.079500396 | -1.433333812 | 0.152729697 | 0.293657437 | no |
| CCDC53       | 0.079498699  | 1.433303017  | 0.152738487 | 0.293657437 | no |
| DDX53        | 0.079489306  | 1.433132598  | 0.152787141 | 0.293724702 | no |
| SLC1A7       | -0.079482965 | -1.433017543 | 0.152819995 | 0.293761584 | no |
| ZNF135       | -0.079473565 | -1.432846994 | 0.152868705 | 0.293816213 | no |
| ZNF574       | -0.079470865 | -1.432798007 | 0.152882698 | 0.293816213 | no |
| CCS          | -0.079469566 | -1.432774447 | 0.152889429 | 0.293816213 | no |
| RNF125       | 0.079459545  | 1.432592613  | 0.152941381 | 0.293889772 | no |
| SIAH3        | -0.0794528   | -1.432470241 | 0.152976351 | 0.293928832 | no |
| GYS2         | -0.079450349 | -1.43242577  | 0.152989061 | 0.293928832 | no |
| CFL1P1       | -0.079441088 | -1.43225775  | 0.15303709  | 0.293994824 | no |
| HOXD1        | -0.079399664 | -1.431506167 | 0.153252071 | 0.294381503 | no |
| PPAN         | -0.079390697 | -1.431343477 | 0.153298637 | 0.294444633 | no |
| TMEM81       | -0.079387324 | -1.431282277 | 0.153316156 | 0.294451967 | no |
| DIS3         | -0.079381062 | -1.431168655 | 0.153348687 | 0.294473749 | no |
| IFNA2        | -0.079379865 | -1.431146949 | 0.153354902 | 0.294473749 | no |
| BMS1P4       | -0.079375799 | -1.431073165 | 0.15337603  | 0.294488008 | no |
| PROK2        | 0.079363391  | 1.430848042  | 0.153440509 | 0.29458549  | no |
| CR1L         | 0.079358268  | 1.430755094  | 0.153467136 | 0.294610293 | no |
| POLR2K       | -0.079349886 | -1.430603018 | 0.15351071  | 0.294653411 | no |
| CCT4         | -0.079348673 | -1.430581006 | 0.153517018 | 0.294653411 | no |
| NLRC3        | 0.079344223  | 1.43050027   | 0.153540156 | 0.294671503 | no |
| FIGNL2       | -0.07932349  | -1.430124117 | 0.153647991 | 0.294852128 | no |
| RAB3D        | 0.079308971  | 1.429860685  | 0.153723546 | 0.294970779 | no |
| FAM154B      | 0.079305092  | 1.429790319  | 0.153743732 | 0.294979436 | no |
| MORC1        | 0.07930283   | 1.429749271  | 0.153755509 | 0.294979436 | no |
| WASL         | -0.079280393 | -1.429342191 | 0.153872338 | 0.295158639 | no |
| NOTUM        | -0.079279615 | -1.429328092 | 0.153876385 | 0.295158639 | no |
| HIST1H4B     | -0.07926873  | -1.429130597 | 0.15393309  | 0.295241057 | no |
| C9orf69      | 0.079257478  | 1.428926446  | 0.153991723 | 0.295327157 | no |
| IDH1         | 0.079252787  | 1.428841353  | 0.154016167 | 0.29534768  | no |
| ZNF648       | 0.079213874  | 1.428135349  | 0.15421909  | 0.295710428 | no |
| LOC730101    | -0.079204453 | -1.427964437 | 0.154268246 | 0.295778291 | no |
| RNF123       | -0.079183311 | -1.427580867 | 0.154378605 | 0.29596348  | no |
| DCAF12L2     | -0.079174918 | -1.427428592 | 0.154422434 | 0.296017876 | no |
| IQCK         | -0.079172602 | -1.427386583 | 0.154434527 | 0.296017876 | no |
| S100A1       | -0.079167953 | -1.427302237 | 0.15445881  | 0.296038017 | no |
| FIBCD1       | -0.079137672 | -1.426752862 | 0.154617043 | 0.296298298 | no |
| NOL6         | 0.079134839  | 1.426701465  | 0.154631852 | 0.296298298 | no |
| C4orf3       | -0.079131206 | -1.426635552 | 0.154650846 | 0.296298298 | no |
| STIM1        | 0.079129832  | 1.426610617  | 0.154658032 | 0.296298298 | no |
| TXNRD3       | 0.079128777  | 1.42659148   | 0.154663548 | 0.296298298 | no |
| GNMT         | -0.079124163 | -1.42650778  | 0.154687672 | 0.296318099 | no |

|              |              |              |             |             |    |
|--------------|--------------|--------------|-------------|-------------|----|
| YIF1B        | 0.07911557   | 1.426351886  | 0.154732611 | 0.296377766 | no |
| SLC5A5       | -0.079107445 | -1.426204472 | 0.154775115 | 0.296432759 | no |
| CATSPERB     | 0.079104537  | 1.426151707  | 0.154790331 | 0.296435483 | no |
| SCEL         | -0.079097857 | -1.426030515 | 0.154825283 | 0.296476001 | no |
| H1FNT        | -0.07909225  | -1.4259288   | 0.154854623 | 0.296505765 | no |
| IN080B-WBP1  | -0.079063594 | -1.425408922 | 0.155004649 | 0.296766585 | no |
| MCRS1        | -0.079050238 | -1.425166621 | 0.155074611 | 0.296861708 | no |
| C5orf38      | -0.079048836 | -1.425141172 | 0.15508196  | 0.296861708 | no |
| COX19        | 0.079045586  | 1.425082216  | 0.155098987 | 0.29686786  | no |
| GLRX3        | -0.079038382 | -1.424951519 | 0.155136738 | 0.296913674 | no |
| LOC100130264 | -0.079027585 | -1.424755643 | 0.15519333  | 0.296995534 | no |
| TSPAN17      | 0.079007986  | 1.424400093  | 0.155296094 | 0.297165733 | no |
| DZIP1        | -0.079001015 | -1.424273611 | 0.155332663 | 0.297209246 | no |
| LOC100272217 | -0.078983337 | -1.423952915 | 0.155425414 | 0.297360239 | no |
| OBSL1        | -0.078974641 | -1.423795143 | 0.15547106  | 0.297421092 | no |
| KLK1         | 0.078967186  | 1.423659898  | 0.155510197 | 0.297469483 | no |
| C5orf58      | -0.078961458 | -1.423555984 | 0.155540272 | 0.297500533 | no |
| RAD21L1      | -0.078956043 | -1.423457743 | 0.155568709 | 0.297528445 | no |
| SLC28A2      | -0.078939582 | -1.423159122 | 0.155655175 | 0.297667322 | no |
| DEDD2        | 0.078917638  | 1.42276102   | 0.155770502 | 0.297861363 | no |
| ZMIZ2        | -0.078911157 | -1.422643456 | 0.155804572 | 0.297900004 | no |
| IAPP         | -0.078901151 | -1.422461938 | 0.155857186 | 0.297974094 | no |
| OVOL2        | -0.07886422  | -1.421791953 | 0.156051505 | 0.298313917 | no |
| PTN          | -0.078860697 | -1.42172804  | 0.156070051 | 0.298313917 | no |
| TRIM41       | -0.078859458 | -1.421705559 | 0.156076576 | 0.298313917 | no |
| SLC25A35     | 0.078854832  | 1.421621648  | 0.156100929 | 0.298333931 | no |
| UCKL1-AS1    | -0.078843588 | -1.421417673 | 0.156160139 | 0.298420555 | no |
| PRKAA1       | 0.078831959  | 1.421206712  | 0.156221396 | 0.298511071 | no |
| RAB9A        | 0.078825929  | 1.421097307  | 0.156253171 | 0.298532532 | no |
| OR8B2        | -0.078824555 | -1.421072388 | 0.156260409 | 0.298532532 | no |
| TBC1D13      | -0.078785575 | -1.420365248 | 0.156465914 | 0.298898573 | no |
| ASB16        | -0.078776359 | -1.420198067 | 0.156514529 | 0.298964869 | no |
| LARP1        | -0.078771381 | -1.42010776  | 0.156540794 | 0.298988465 | no |
| HEPH         | 0.0787582    | 1.419868652  | 0.156610354 | 0.299094741 | no |
| ZZEF1        | -0.078754445 | -1.41980054  | 0.156630173 | 0.29910506  | no |
| KIT          | -0.078747847 | -1.419680832 | 0.15666501  | 0.29910506  | no |
| FAM90A27P    | 0.078741022  | 1.419557028  | 0.156701045 | 0.29910506  | no |
| HRNR         | 0.078740679  | 1.419550806  | 0.156702856 | 0.29910506  | no |
| CCDC78       | -0.078740073 | -1.419539817 | 0.156706055 | 0.29910506  | no |
| TAS2R20      | -0.078739146 | -1.419523005 | 0.156710949 | 0.29910506  | no |
| ANKDD1A      | -0.078737682 | -1.419496447 | 0.156718681 | 0.29910506  | no |
| FTX          | -0.078736088 | -1.419467531 | 0.156727099 | 0.29910506  | no |
| WDR38        | 0.07873123   | 1.419379398  | 0.156752759 | 0.299127467 | no |
| TRIM35       | -0.078720794 | -1.419190076 | 0.15680789  | 0.299206105 | no |
| CALCR        | 0.078688693  | 1.418607756  | 0.156977556 | 0.299503255 | no |
| KCNQ3        | -0.078684423 | -1.418530297 | 0.157000135 | 0.299519744 | no |
| DFNB59       | -0.078677793 | -1.418410014 | 0.157035203 | 0.299560052 | no |
| ZNF383       | 0.078667093  | 1.418215921  | 0.157091801 | 0.299641422 | no |
| LOC100506321 | 0.078662762  | 1.418137352  | 0.157114717 | 0.299658536 | no |
| ZNF302       | -0.078658747 | -1.41806452  | 0.157135961 | 0.299672459 | no |
| ARHGEF28     | 0.078644883  | 1.417813019  | 0.157209339 | 0.299785794 | no |

|              |              |              |             |             |    |
|--------------|--------------|--------------|-------------|-------------|----|
| LOC100506060 | -0.078641713 | -1.417755513 | 0.157226121 | 0.299791195 | no |
| TMA7         | -0.078619582 | -1.417354053 | 0.157343314 | 0.299988037 | no |
| SFTPD        | -0.078607983 | -1.417143656 | 0.157404759 | 0.300064076 | no |
| LOC400084    | 0.078606782  | 1.417121876  | 0.157411121 | 0.300064076 | no |
| LOC100130480 | -0.078591676 | -1.416847844 | 0.15749118  | 0.300190061 | no |
| CSRP2        | 0.07858332   | 1.416696267  | 0.157535477 | 0.300247865 | no |
| POU5F1P4     | -0.07856795  | -1.416417462 | 0.157616979 | 0.300376563 | no |
| GXYLT1       | 0.078564518  | 1.416355196  | 0.157635186 | 0.300384623 | no |
| LOC389634    | -0.078558385 | -1.416243953 | 0.157667717 | 0.300419976 | no |
| MYO15B       | 0.078551101  | 1.41611181   | 0.157706367 | 0.30046698  | no |
| PPP2R3C      | -0.07853904  | -1.415893041 | 0.15777037  | 0.300562274 | no |
| SH3D21       | 0.078533139  | 1.415785987  | 0.157801696 | 0.300595308 | no |
| MTUS2        | -0.07852367  | -1.415614225 | 0.157851968 | 0.30066442  | no |
| SEC1P        | -0.078510353 | -1.415372659 | 0.157922691 | 0.30077247  | no |
| PAPD5        | -0.078478554 | -1.414795836 | 0.158091664 | 0.301046027 | no |
| MBOAT7       | -0.078478051 | -1.414786706 | 0.15809434  | 0.301046027 | no |
| CBLL1        | -0.078464341 | -1.414538021 | 0.158167232 | 0.301158146 | no |
| SHARPIN      | 0.07845454   | 1.41436024   | 0.158219358 | 0.301221625 | no |
| APOO         | -0.078452802 | -1.41432871  | 0.158228604 | 0.301221625 | no |
| SFI1         | -0.078443416 | -1.414158461 | 0.158278535 | 0.301289991 | no |
| WFIKKN2      | -0.078432804 | -1.41396596  | 0.158335007 | 0.301370795 | no |
| PAG1         | -0.078425538 | -1.413834164 | 0.15837368  | 0.301417707 | no |
| CARS         | -0.078417653 | -1.413691123 | 0.15841566  | 0.301470907 | no |
| TMA16        | -0.078413634 | -1.413618225 | 0.158437058 | 0.30148493  | no |
| MRPL42       | -0.078393084 | -1.413245471 | 0.158546506 | 0.301666486 | no |
| VPS28        | -0.078378751 | -1.412985478 | 0.158622879 | 0.301763688 | no |
| APPBP2       | -0.078375973 | -1.412935083 | 0.158637686 | 0.301763688 | no |
| BCLAF1       | 0.078375592  | 1.412928172  | 0.158639717 | 0.301763688 | no |
| EFNB3        | -0.078350373 | -1.412470738 | 0.158774167 | 0.301943951 | no |
| PSMB1        | 0.07835032   | 1.412469776  | 0.15877445  | 0.301943951 | no |
| CDC14A       | 0.078347864  | 1.412425215  | 0.158787552 | 0.301943951 | no |
| ANXA3        | -0.078347277 | -1.412414574 | 0.158790681 | 0.301943951 | no |
| FAM218A      | -0.078328698 | -1.412077562 | 0.1588898   | 0.302105697 | no |
| SULT1C4      | -0.078312091 | -1.411776334 | 0.158978435 | 0.30223201  | no |
| THUMPD2      | -0.078308708 | -1.411714967 | 0.158996496 | 0.30223201  | no |
| FAM178B      | -0.078308347 | -1.411708422 | 0.158998423 | 0.30223201  | no |
| LOC389705    | -0.078286514 | -1.4113124   | 0.159115018 | 0.302426891 | no |
| ANKRD2       | -0.078282625 | -1.411241853 | 0.159135795 | 0.302439633 | no |
| LINC00684    | -0.078279514 | -1.411185436 | 0.159152412 | 0.302444468 | no |
| RBM14-RBM4   | 0.078276778  | 1.411135801  | 0.159167032 | 0.302445508 | no |
| C12orf57     | -0.078271184 | -1.41103434  | 0.159196922 | 0.302475559 | no |
| TCF21        | 0.07826266   | 1.410879726  | 0.159242478 | 0.30253537  | no |
| COX6A2       | 0.078249135  | 1.410634395  | 0.159314784 | 0.302628066 | no |
| RAMP2        | -0.078248265 | -1.410618625 | 0.159319433 | 0.302628066 | no |
| SSX8         | 0.07823482   | 1.410374752  | 0.159391336 | 0.302737887 | no |
| CLN8         | -0.078226291 | -1.410220037 | 0.159436964 | 0.302797791 | no |
| INPP5E       | -0.078222263 | -1.410146985 | 0.159458512 | 0.302811954 | no |
| PTRH1        | 0.078206363  | 1.409858575  | 0.159543605 | 0.302942598 | no |
| UPK1B        | -0.07820414  | -1.409818265 | 0.159555501 | 0.302942598 | no |
| STXBP2       | 0.078167157  | 1.409147461  | 0.15975356  | 0.303291852 | no |
| LOC100131060 | 0.07815705   | 1.408964126  | 0.159807723 | 0.303367881 | no |

|              |              |              |             |             |    |
|--------------|--------------|--------------|-------------|-------------|----|
| HPR          | -0.078153085 | -1.408892207 | 0.159828975 | 0.303381425 | no |
| CHDC2        | 0.078149201  | 1.408821767  | 0.159849791 | 0.30339414  | no |
| SNX5         | 0.078108354  | 1.408080886  | 0.160068858 | 0.3037831   | no |
| KTN1-AS1     | -0.078094338 | -1.407826651 | 0.160144084 | 0.30389903  | no |
| BNIP1        | -0.078069059 | -1.407368161 | 0.160279815 | 0.304129747 | no |
| C1orf64      | -0.078058796 | -1.407181998 | 0.160334952 | 0.304207508 | no |
| XIAP         | -0.07802923  | -1.406645747 | 0.160493856 | 0.30448212  | no |
| FAM221A      | 0.078022726  | 1.406527786  | 0.160528826 | 0.304521582 | no |
| LOC100216546 | -0.07800973  | -1.406292063 | 0.160598726 | 0.304627292 | no |
| LOC100129055 | -0.078003671 | -1.406182169 | 0.160631321 | 0.304662229 | no |
| MID2         | 0.077994684  | 1.406019176  | 0.160679675 | 0.304727046 | no |
| DGCR2        | -0.077982326 | -1.405795034 | 0.160746187 | 0.304826273 | no |
| MIR548I1     | -0.077978248 | -1.405721064 | 0.160768142 | 0.304826273 | no |
| LOC286094    | -0.077977058 | -1.405699484 | 0.160774547 | 0.304826273 | no |
| RGL3         | 0.077959946  | 1.405389105  | 0.160866697 | 0.304949118 | no |
| TPCN2        | 0.077959756  | 1.405385662  | 0.160867719 | 0.304949118 | no |
| MTFP1        | 0.077952012  | 1.40524521   | 0.160909432 | 0.305001287 | no |
| SIX1         | -0.077935374 | -1.404943441 | 0.160999081 | 0.305103123 | no |
| FNBP4        | -0.077933256 | -1.404905034 | 0.161010494 | 0.305103123 | no |
| C17orf89     | -0.077932204 | -1.404885957 | 0.161016163 | 0.305103123 | no |
| SEMA4D       | -0.077931503 | -1.404873232 | 0.161019944 | 0.305103123 | no |
| LOC113230    | -0.077915233 | -1.404578136 | 0.161107657 | 0.30524241  | no |
| CCDC160      | -0.077911493 | -1.404510306 | 0.161127824 | 0.305253707 | no |
| PKMYT1       | -0.077906231 | -1.40441487  | 0.161156201 | 0.305280556 | no |
| ATP6V0D1     | 0.077902968  | 1.404355697  | 0.161173797 | 0.30528698  | no |
| PTGR1        | 0.07789755   | 1.404257421  | 0.161203026 | 0.305315433 | no |
| JAK1         | 0.077893231  | 1.404179101  | 0.161226321 | 0.305332647 | no |
| ZFAND2A      | 0.077885925  | 1.404046579  | 0.161265745 | 0.305380397 | no |
| KLHL34       | -0.07787908  | -1.403922441 | 0.161302681 | 0.30542343  | no |
| ADAMTSL2     | -0.077874485 | -1.403839097 | 0.161327484 | 0.305443481 | no |
| NCDN         | -0.077858541 | -1.403549931 | 0.161413558 | 0.305579525 | no |
| C9orf3       | 0.077839398  | 1.403202726  | 0.161516954 | 0.305748336 | no |
| PCAT1        | -0.077827892 | -1.402994039 | 0.161579124 | 0.305839084 | no |
| LOC100129961 | -0.07782213  | -1.402889539 | 0.161610263 | 0.305865971 | no |
| LINC00654    | 0.077819996  | 1.402850845  | 0.161621794 | 0.305865971 | no |
| SETD9        | 0.077810531  | 1.402679185  | 0.161672957 | 0.305912189 | no |
| CARD17       | 0.077810212  | 1.402673391  | 0.161674684 | 0.305912189 | no |
| PSMD2        | 0.07780457   | 1.402571057  | 0.161705191 | 0.305942976 | no |
| CD177        | 0.077800283  | 1.402493314  | 0.16172837  | 0.305959894 | no |
| AQP12A       | 0.077796443  | 1.402423663  | 0.161749138 | 0.30597225  | no |
| PNPLA5       | -0.077784287 | -1.402203201 | 0.161814889 | 0.306044253 | no |
| FERMT2       | 0.07778414   | 1.402200537  | 0.161815683 | 0.306044253 | no |
| SCARNA12     | -0.077771616 | -1.401973384 | 0.161883451 | 0.30614548  | no |
| CTNNA3       | -0.077754082 | -1.401655387 | 0.161978356 | 0.306298007 | no |
| GATAD1       | 0.077746606  | 1.401519801  | 0.162018834 | 0.306339704 | no |
| CHRFAM7A     | 0.077744744  | 1.401486036  | 0.162028915 | 0.306339704 | no |
| GRM7         | -0.07773296  | -1.401272313 | 0.162092739 | 0.306433414 | no |
| NRBP2        | -0.077728775 | -1.401196417 | 0.162115408 | 0.306449313 | no |
| ALYREF       | -0.077722152 | -1.401076297 | 0.162151292 | 0.306490186 | no |
| RAB1F        | 0.077717679  | 1.40099517   | 0.16217553  | 0.306492144 | no |
| ZNF222       | -0.077716697 | -1.400977363 | 0.162180851 | 0.306492144 | no |



|              |              |              |             |             |    |
|--------------|--------------|--------------|-------------|-------------|----|
| SDF2         | -0.077713596 | -1.400921124 | 0.162197656 | 0.30649695  | no |
| MYO3A        | 0.077705628  | 1.400776616  | 0.162240842 | 0.306523218 | no |
| ALK          | 0.07769796   | 1.400637536  | 0.162282414 | 0.306523218 | no |
| LOC401320    | 0.077696725  | 1.400615152  | 0.162289106 | 0.306523218 | no |
| CXorf23      | -0.077693234 | -1.400551826 | 0.162308037 | 0.306523218 | no |
| LOC255167    | -0.077691566 | -1.400521582 | 0.16231708  | 0.306523218 | no |
| ZNF790       | 0.077691084  | 1.400512841  | 0.162319693 | 0.306523218 | no |
| USP6         | -0.077689547 | -1.400484961 | 0.162328029 | 0.306523218 | no |
| ITGB8        | 0.077688737  | 1.400470276  | 0.16233242  | 0.306523218 | no |
| BCOR         | -0.077687354 | -1.400445187 | 0.162339922 | 0.306523218 | no |
| NUPL1        | -0.077645422 | -1.3996847   | 0.162567442 | 0.306925846 | no |
| MRVI1-AS1    | -0.077635476 | -1.399504321 | 0.162621443 | 0.307000829 | no |
| GGT3P        | -0.077613534 | -1.399106396 | 0.16274062  | 0.307198828 | no |
| KRT74        | -0.077610653 | -1.399054134 | 0.162756277 | 0.3072014   | no |
| LOC643542    | 0.077584923  | 1.398587504  | 0.162896124 | 0.30743836  | no |
| REC8         | -0.077581933 | -1.398533277 | 0.162912382 | 0.307442044 | no |
| PRDX5        | -0.077566842 | -1.398259601 | 0.16299445  | 0.307569912 | no |
| CNTN5        | -0.077538577 | -1.397747004 | 0.163148249 | 0.307833101 | no |
| EIF5A        | -0.077535255 | -1.397686751 | 0.163166335 | 0.307834442 | no |
| MKKS         | -0.077533184 | -1.397649197 | 0.163177607 | 0.307834442 | no |
| RPAP3        | 0.077510625  | 1.397240073  | 0.163300456 | 0.308024715 | no |
| WDR61        | 0.077509399  | 1.397217842  | 0.163307133 | 0.308024715 | no |
| NEDD4L       | -0.077488818 | -1.39684459  | 0.163419275 | 0.308171175 | no |
| RRS1         | -0.077488261 | -1.396834493 | 0.16342231  | 0.308171175 | no |
| LOC441601    | 0.077487253  | 1.396816219  | 0.163427802 | 0.308171175 | no |
| LINC00648    | -0.077484054 | -1.396758193 | 0.163445241 | 0.30817702  | no |
| PSMC5        | -0.077438201 | -1.395926639 | 0.163695318 | 0.308621464 | no |
| LOC90499     | -0.077424254 | -1.395673723 | 0.163771435 | 0.308737888 | no |
| PDE5A        | 0.077411281  | 1.395438459  | 0.163842265 | 0.308844322 | no |
| WDR33        | -0.07740464  | -1.395318026 | 0.163878532 | 0.308885592 | no |
| MECOM        | 0.077391395  | 1.395077827  | 0.163950883 | 0.308994863 | no |
| NPY1R        | 0.077379701  | 1.394865756  | 0.164014781 | 0.309088185 | no |
| RPS15        | -0.077371806 | -1.394722573 | 0.164057934 | 0.309142399 | no |
| LINC00423    | -0.077338756 | -1.394123222 | 0.164238661 | 0.309455819 | no |
| TPRX1        | -0.077330281 | -1.393969528 | 0.16428503  | 0.30951605  | no |
| OR4N3P       | -0.077326985 | -1.393909762 | 0.164303064 | 0.309522892 | no |
| CDCA7        | -0.077284463 | -1.393138647 | 0.164535875 | 0.309934306 | no |
| IMP4         | -0.077279047 | -1.393040423 | 0.164565548 | 0.309963032 | no |
| SPP2         | 0.077267378  | 1.392828818  | 0.164629487 | 0.310053914 | no |
| STAC2        | -0.077264976 | -1.392785253 | 0.164642653 | 0.310053914 | no |
| ZNF256       | -0.077252177 | -1.39255316  | 0.164712809 | 0.310158852 | no |
| CLIC5        | -0.077249494 | -1.392504497 | 0.164727521 | 0.31015938  | no |
| LOC284023    | -0.077244032 | -1.39240546  | 0.164757467 | 0.310188587 | no |
| FLAD1        | -0.077234812 | -1.392238259 | 0.164808031 | 0.310229781 | no |
| LOC100287792 | -0.077234778 | -1.392237642 | 0.164808218 | 0.310229781 | no |
| RPS2         | 0.077225443  | 1.392068355  | 0.164859426 | 0.310298994 | no |
| RCE1         | 0.077208054  | 1.391753027  | 0.164954842 | 0.310451397 | no |
| RGS6         | -0.077204643 | -1.391691168 | 0.164973565 | 0.310459446 | no |
| CDHR3        | -0.077184399 | -1.391324067 | 0.165084709 | 0.310641404 | no |
| LNX2         | 0.077170558  | 1.391073067  | 0.165160734 | 0.310757253 | no |
| ZBTB45       | -0.077154242 | -1.390777202 | 0.165250383 | 0.310898711 | no |

|              |              |              |             |             |    |
|--------------|--------------|--------------|-------------|-------------|----|
| ARHGEF19     | 0.077134653  | 1.390421975  | 0.165358068 | 0.311074075 | no |
| KIAA1430     | -0.077101082 | -1.389813201 | 0.165542736 | 0.311394219 | no |
| PRM1         | -0.077089534 | -1.389603797 | 0.165606294 | 0.311479576 | no |
| RBL1         | 0.077087571  | 1.389568198  | 0.165617101 | 0.311479576 | no |
| ICA1         | -0.077073077 | -1.389305371 | 0.165696904 | 0.311602394 | no |
| RPP14        | -0.077042162 | -1.388744786 | 0.165867212 | 0.311895377 | no |
| ZCCHC9       | 0.077036312  | 1.388638708  | 0.165899454 | 0.311928712 | no |
| C3orf27      | -0.077028433 | -1.388495829 | 0.165942889 | 0.311983084 | no |
| GABPB2       | 0.076983609  | 1.387683013  | 0.166190147 | 0.312420613 | no |
| TMTC1        | 0.076976971  | 1.387562656  | 0.166226783 | 0.31243652  | no |
| SNORA60      | -0.076976808 | -1.387559695 | 0.166227685 | 0.31243652  | no |
| DENND1A      | 0.076971989  | 1.387472318  | 0.166254286 | 0.312437372 | no |
| CCDC58       | -0.076971459 | -1.387462699 | 0.166257214 | 0.312437372 | no |
| C11orf57     | -0.076967053 | -1.387382801 | 0.166281542 | 0.312455768 | no |
| GON4L        | -0.076963388 | -1.387316343 | 0.166301779 | 0.312466474 | no |
| VPS9D1       | -0.076948157 | -1.387040169 | 0.166385897 | 0.312587174 | no |
| PPP2R3B      | -0.076946178 | -1.387004282 | 0.16639683  | 0.312587174 | no |
| DSN1         | 0.076943857  | 1.386962191  | 0.166409653 | 0.312587174 | no |
| STOML3       | 0.076930087  | 1.386712513  | 0.166485737 | 0.312702759 | no |
| QRSL1        | -0.076912243 | -1.386388949 | 0.166584374 | 0.312860682 | no |
| PAGE2B       | 0.076892797  | 1.386036334  | 0.166691918 | 0.313035303 | no |
| FKBP5        | 0.076883044  | 1.385859488  | 0.166745874 | 0.313109269 | no |
| TTC8         | 0.076878164  | 1.385770998  | 0.166772878 | 0.313132615 | no |
| COPE         | -0.076869314 | -1.385610514 | 0.166821859 | 0.31318946  | no |
| WDR27        | -0.076867428 | -1.385576312 | 0.166832299 | 0.31318946  | no |
| TMEM255A     | 0.076856971  | 1.385386703  | 0.166890186 | 0.313270766 | no |
| KRTAP21-3    | -0.076843232 | -1.385137589 | 0.166966263 | 0.313381136 | no |
| PPM1A        | -0.076841086 | -1.38509868  | 0.166978148 | 0.313381136 | no |
| C11orf88     | 0.076837824  | 1.385039524  | 0.166996219 | 0.313387682 | no |
| PRKY         | 0.076835168  | 1.384991372  | 0.167010929 | 0.313387922 | no |
| LOC100130899 | -0.076831435 | -1.384923677 | 0.167031611 | 0.313399367 | no |
| LOC646813    | 0.076820865  | 1.38473202   | 0.167090176 | 0.313481884 | no |
| MTMR2        | -0.076817326 | -1.384667837 | 0.167109792 | 0.313491319 | no |
| LOC100506229 | 0.076802792  | 1.384404299  | 0.167190355 | 0.313615076 | no |
| P2RX7        | -0.076768021 | -1.383773833 | 0.167383206 | 0.313949422 | no |
| ABCA2        | -0.076744936 | -1.383355241 | 0.16751134  | 0.31414854  | no |
| ZNF414       | -0.076743628 | -1.383331524 | 0.167518602 | 0.31414854  | no |
| TPH1         | 0.076723341  | 1.382963691  | 0.167631263 | 0.314332385 | no |
| ABHD12B      | 0.076696714  | 1.382480887  | 0.167779224 | 0.314576737 | no |
| PPEF1        | 0.076694623  | 1.38244297   | 0.167790849 | 0.314576737 | no |
| ZWINT        | -0.076690846 | -1.382374476 | 0.167811849 | 0.314588664 | no |
| MNS1         | 0.076644783  | 1.381539286  | 0.168068074 | 0.315036411 | no |
| RASA1        | -0.076642639 | -1.381500403 | 0.16808001  | 0.315036411 | no |
| GNL3         | -0.076635928 | -1.381378713 | 0.168117369 | 0.315078955 | no |
| ZFPL1        | -0.076623513 | -1.381153624 | 0.168186489 | 0.315181011 | no |
| TSC1         | -0.076611024 | -1.380927177 | 0.168256048 | 0.315283871 | no |
| PYCR1        | -0.076604454 | -1.380808047 | 0.16829265  | 0.315324965 | no |
| HADHA        | -0.07657567  | -1.380286143 | 0.168453074 | 0.315567855 | no |
| SLC2A4RG     | 0.076575128  | 1.380276322  | 0.168456094 | 0.315567855 | no |
| TRIM44       | 0.076573291  | 1.38024302   | 0.168466335 | 0.315567855 | no |
| NLRP11       | -0.076567617 | -1.38014014  | 0.168497974 | 0.315599613 | no |

|              |              |              |             |             |    |
|--------------|--------------|--------------|-------------|-------------|----|
| LOC284933    | -0.076563641 | -1.380068038 | 0.16852015  | 0.315613643 | no |
| TMEM44-AS1   | 0.076538591  | 1.379613854  | 0.168659894 | 0.315847838 | no |
| FLJ33534     | -0.076527976 | -1.379421384 | 0.16871914  | 0.315931257 | no |
| GDF6         | -0.076514457 | -1.379176277 | 0.168794611 | 0.316045042 | no |
| PRRT3-AS1    | 0.076507085  | 1.379042616  | 0.168835778 | 0.316094581 | no |
| PPP1R42      | 0.076498463  | 1.378886294  | 0.168883933 | 0.316157196 | no |
| C9orf116     | 0.076495243  | 1.378827903  | 0.168901923 | 0.316163334 | no |
| FAM138D      | -0.076485863 | -1.37865783  | 0.168954331 | 0.31623389  | no |
| CRABP1       | -0.076471826 | -1.378403327 | 0.169032778 | 0.316353168 | no |
| DLEU1        | -0.076464299 | -1.378266849 | 0.169074857 | 0.316404367 | no |
| ITPKB        | 0.076437474  | 1.37778049   | 0.169224875 | 0.316657535 | no |
| SCAF11       | 0.076433079  | 1.377700809  | 0.169249462 | 0.31667597  | no |
| MDM4         | -0.07643017  | -1.377648074 | 0.169265736 | 0.316678849 | no |
| NDUFAB1      | -0.076420061 | -1.377464777 | 0.169322311 | 0.316757118 | no |
| LOC100190986 | -0.076413681 | -1.377349114 | 0.169358017 | 0.31679634  | no |
| PPP1R37      | -0.076383284 | -1.376797983 | 0.169528237 | 0.317087148 | no |
| LAMTOR1      | 0.076367633  | 1.376514226  | 0.169615926 | 0.317223555 | no |
| LOC643623    | -0.076344082 | -1.376087235 | 0.169747944 | 0.317442836 | no |
| NWD1         | 0.07634003   | 1.376013768  | 0.169770667 | 0.317457705 | no |
| STK31        | 0.076328728  | 1.375808857  | 0.169834056 | 0.317548607 | no |
| GOPC         | -0.076309384 | -1.375458145 | 0.169942589 | 0.317721192 | no |
| NOTCH2       | 0.076307007  | 1.375415057  | 0.169955927 | 0.317721192 | no |
| PRSS46       | 0.076295584  | 1.37520794   | 0.17002005  | 0.317790355 | no |
| LRR1Q3       | 0.076295148  | 1.375200037  | 0.170022498 | 0.317790355 | no |
| DDX11L2      | -0.076288987 | -1.375088337 | 0.170057088 | 0.317827366 | no |
| LOC389033    | -0.07628313  | -1.374982149 | 0.170089977 | 0.317858592 | no |
| SYCP2L       | -0.076280744 | -1.374938889 | 0.170103376 | 0.317858592 | no |
| LOC100130331 | -0.076270509 | -1.374753332 | 0.170160862 | 0.317938366 | no |
| ASPG         | -0.076264575 | -1.374645756 | 0.170194196 | 0.317973004 | no |
| CYP4Z1       | -0.076229518 | -1.37401016  | 0.170391243 | 0.318313474 | no |
| POLR1C       | -0.076209857 | -1.373653716 | 0.170501823 | 0.318492367 | no |
| MNX1         | -0.076205743 | -1.373579121 | 0.170524971 | 0.318507923 | no |
| SNORA20      | -0.076196531 | -1.373412115 | 0.170576806 | 0.318577052 | no |
| CEP19        | 0.076157167  | 1.372698456  | 0.17079844  | 0.318949051 | no |
| RBM39        | -0.076155884 | -1.372675192 | 0.170805669 | 0.318949051 | no |
| LOC338963    | -0.076135913 | -1.372313127 | 0.170918199 | 0.319131451 | no |
| S100G        | -0.076133094 | -1.372262017 | 0.170934088 | 0.319133393 | no |
| TMEM125      | -0.076101053 | -1.371681132 | 0.171114756 | 0.319417759 | no |
| PCDP1        | 0.07610081   | 1.37167673   | 0.171116126 | 0.319417759 | no |
| NR4A1        | 0.076078907  | 1.371279638  | 0.171239713 | 0.319620695 | no |
| BTBD8        | -0.076057839 | -1.370897684 | 0.171358653 | 0.319804594 | no |
| PRKRIR       | -0.076056184 | -1.370867673 | 0.171368001 | 0.319804594 | no |
| LCE1F        | 0.076041637  | 1.370603959  | 0.17145016  | 0.319930138 | no |
| CERS6        | -0.076030564 | -1.370403209 | 0.171512723 | 0.319995153 | no |
| NEK1         | -0.076028112 | -1.370358751 | 0.171526581 | 0.319995153 | no |
| ANAPC4       | 0.076027565  | 1.370348838  | 0.171529671 | 0.319995153 | no |
| SPATA31A4    | -0.076009966 | -1.370029787 | 0.171629145 | 0.320152934 | no |
| FBXO48       | 0.076002839  | 1.369900578  | 0.171669442 | 0.320200311 | no |
| EIF4E        | -0.07597306  | -1.369360714 | 0.17183789  | 0.320486687 | no |
| ABR          | -0.075956209 | -1.369055221 | 0.171933265 | 0.32063674  | no |
| EID2         | -0.075950742 | -1.368956117 | 0.171964213 | 0.32066663  | no |

|              |              |              |             |             |    |
|--------------|--------------|--------------|-------------|-------------|----|
| LIG1         | -0.075938258 | -1.368729787 | 0.172034908 | 0.320770624 | no |
| PSMD7        | 0.075921049  | 1.368417826  | 0.172132387 | 0.320924536 | no |
| DDI2         | 0.07591598   | 1.368325928  | 0.17216111  | 0.320950244 | no |
| MLANA        | -0.07591002  | -1.368217879 | 0.172194886 | 0.320970822 | no |
| APOH         | 0.075907167  | 1.368166158  | 0.172211056 | 0.320970822 | no |
| C21orf37     | -0.075906127 | -1.368147294 | 0.172216954 | 0.320970822 | no |
| LIMA1        | -0.075899568 | -1.368028394 | 0.172254131 | 0.321012272 | no |
| FBXW2        | 0.075894657  | 1.367939372  | 0.17228197  | 0.321017893 | no |
| GOLGA6L1     | -0.075893766 | -1.367923219 | 0.172287021 | 0.321017893 | no |
| PARPBP       | 0.075876575  | 1.367611568  | 0.17238451  | 0.321171695 | no |
| USHBP1       | -0.075870636 | -1.367503901 | 0.172418199 | 0.321206616 | no |
| RBM12        | -0.075866068 | -1.367421096 | 0.172444113 | 0.321227046 | no |
| ANXA2P1      | -0.075863358 | -1.367371954 | 0.172459493 | 0.321227852 | no |
| HAR1B        | -0.075840011 | -1.366948717 | 0.172591997 | 0.321418939 | no |
| ZBED5        | -0.075839488 | -1.366939232 | 0.172594967 | 0.321418939 | no |
| ZDHHC15      | -0.075837377 | -1.366900967 | 0.172606951 | 0.321418939 | no |
| TMPRSS11GP   | -0.075828565 | -1.366741218 | 0.172656987 | 0.321475749 | no |
| PA2G4        | -0.075826736 | -1.366708054 | 0.172667376 | 0.321475749 | no |
| AMY2B        | -0.07579511  | -1.366134735 | 0.172847047 | 0.321782388 | no |
| MYPOP        | -0.075781428 | -1.365886702 | 0.172924821 | 0.321877581 | no |
| CSNK2A2      | -0.075779328 | -1.365848635 | 0.17293676  | 0.321877581 | no |
| LOC100129931 | -0.07577821  | -1.365828381 | 0.172943112 | 0.321877581 | no |
| POLR1A       | -0.075769103 | -1.365663284 | 0.172994899 | 0.321946084 | no |
| ZNF223       | -0.075758066 | -1.365463203 | 0.173057676 | 0.322035025 | no |
| FNDC4        | 0.075738078  | 1.365100866  | 0.173171404 | 0.322218757 | no |
| ZNF484       | -0.075730481 | -1.364963148 | 0.173214645 | 0.322271313 | no |
| MED22        | 0.075727501  | 1.36490912   | 0.173231611 | 0.322274978 | no |
| LOC400655    | -0.075721136 | -1.364793736 | 0.173267848 | 0.322314492 | no |
| ZNF320       | -0.075709779 | -1.364587863 | 0.173332519 | 0.322406886 | no |
| HSPE1-MOB4   | 0.075700752  | 1.364424223  | 0.173383936 | 0.322422902 | no |
| ZNF546       | -0.07569879  | -1.364388647 | 0.173395115 | 0.322422902 | no |
| GK3P         | -0.075698644 | -1.36438601  | 0.173395944 | 0.322422902 | no |
| CDT1         | -0.075697732 | -1.364369475 | 0.17340114  | 0.322422902 | no |
| LOC644936    | -0.075682903 | -1.364100652 | 0.173485637 | 0.322552109 | no |
| THAP7        | -0.075675608 | -1.36396842  | 0.173527212 | 0.322601498 | no |
| CENPQ        | -0.075643779 | -1.363391425 | 0.173708712 | 0.322888449 | no |
| AZU1         | -0.07564327  | -1.36338221  | 0.173711612 | 0.322888449 | no |
| C14orf93     | -0.075636345 | -1.363256676 | 0.173751119 | 0.322933953 | no |
| MGC72080     | 0.075631716  | 1.363172765  | 0.173777531 | 0.322954119 | no |
| PTCD1        | -0.075628313 | -1.363111061 | 0.173796954 | 0.322954119 | no |
| DLX1         | -0.075626543 | -1.363078988 | 0.173807051 | 0.322954119 | no |
| REEP3        | 0.075606011  | 1.362706781  | 0.173924258 | 0.323143964 | no |
| TMEM184C     | 0.075594204  | 1.362492767  | 0.173991677 | 0.323214789 | no |
| LCE5A        | -0.075594068 | -1.362490292 | 0.173992457 | 0.323214789 | no |
| BCKDHB       | -0.075589207 | -1.362402184 | 0.174020219 | 0.32323842  | no |
| LOC152742    | -0.075552049 | -1.361728612 | 0.174232563 | 0.323604875 | no |
| EID3         | 0.075541189  | 1.361531745  | 0.174294662 | 0.323666427 | no |
| DEFB113      | 0.075540986  | 1.361528061  | 0.174295824 | 0.323666427 | no |
| PAN2         | -0.075518209 | -1.361115185 | 0.174426116 | 0.323880391 | no |
| SEMA6D       | -0.075484843 | -1.360510351 | 0.174617115 | 0.324207033 | no |
| SETD4        | -0.075480269 | -1.360427449 | 0.174643306 | 0.324227651 | no |

|              |              |              |             |             |    |
|--------------|--------------|--------------|-------------|-------------|----|
| FAM193B      | -0.075475512 | -1.360341215 | 0.174670554 | 0.324250227 | no |
| SUOX         | -0.075471246 | -1.360263894 | 0.174694988 | 0.324267575 | no |
| LOC100507584 | -0.075453143 | -1.359935734 | 0.174798717 | 0.324406866 | no |
| MRPS12       | 0.075452881  | 1.359930982  | 0.174800219 | 0.324406866 | no |
| MAD2L1       | -0.075432926 | -1.359569274 | 0.174914607 | 0.324591125 | no |
| GYS1         | 0.075428079  | 1.359481404  | 0.174942404 | 0.324600119 | no |
| ANKRD10      | 0.075426813  | 1.359458463  | 0.174949661 | 0.324600119 | no |
| PGP          | -0.075406382 | -1.359088118 | 0.175066856 | 0.324789521 | no |
| SAR1B        | 0.075392856  | 1.358842941  | 0.175144474 | 0.324905472 | no |
| CACNA2D2     | -0.075383859 | -1.358679852 | 0.175196119 | 0.324965686 | no |
| RASL12       | -0.075381933 | -1.358644943 | 0.175207175 | 0.324965686 | no |
| LINC00085    | 0.075377004  | 1.358555599  | 0.175235474 | 0.324990125 | no |
| TOX2         | -0.075356699 | -1.358187532 | 0.17535209  | 0.325178339 | no |
| BMP3         | -0.075325978 | -1.35763068  | 0.175528631 | 0.325477636 | no |
| TMEM105      | -0.075266176 | -1.356546697 | 0.175872672 | 0.326087446 | no |
| FBXO2        | -0.075262283 | -1.356476141 | 0.175895082 | 0.326100864 | no |
| KIR2DL3      | 0.075255005  | 1.356344221  | 0.17593699  | 0.326150424 | no |
| WBSCR28      | 0.075243006  | 1.356126726  | 0.1760061   | 0.326248679 | no |
| TPM2         | 0.075240532  | 1.356081874  | 0.176020354 | 0.326248679 | no |
| AQP7P3       | -0.075224573 | -1.355792611 | 0.176112305 | 0.326390959 | no |
| SLC14A1      | -0.075213246 | -1.355587291 | 0.176177594 | 0.326483805 | no |
| VSTM4        | 0.07519835   | 1.355317286  | 0.17626348  | 0.3266148   | no |
| C12orf39     | -0.075193284 | -1.355225466 | 0.176292694 | 0.32664077  | no |
| CCNJ         | -0.075180981 | -1.355002475 | 0.176363657 | 0.326744083 | no |
| LRPAP1       | 0.075172533  | 1.354849349  | 0.1764124   | 0.326806214 | no |
| C21orf33     | -0.07515056  | -1.354451073 | 0.176539225 | 0.32701297  | no |
| SRP9         | -0.075145936 | -1.354367265 | 0.176565921 | 0.327034233 | no |
| HBZ          | -0.075137899 | -1.35422159  | 0.176612331 | 0.327092003 | no |
| TMC2         | -0.075129185 | -1.354063638 | 0.176662663 | 0.327157026 | no |
| MTM1         | 0.075115004  | 1.3538066    | 0.176744591 | 0.327273693 | no |
| GGT8P        | -0.0751093   | -1.353703207 | 0.176777555 | 0.327273693 | no |
| LOC100506714 | -0.07510906  | -1.353698869 | 0.176778938 | 0.327273693 | no |
| MED4         | -0.075106674 | -1.353655623 | 0.176792727 | 0.327273693 | no |
| RCOR1        | -0.075105104 | -1.353627157 | 0.176801804 | 0.327273693 | no |
| IQCB1        | 0.075072753  | 1.353040791  | 0.176988855 | 0.327591723 | no |
| RANBP2       | 0.07505531   | 1.35272464   | 0.177089769 | 0.327734767 | no |
| NEIL1        | -0.075054123 | -1.352703126 | 0.177096638 | 0.327734767 | no |
| SMURF1       | -0.075026405 | -1.35220073  | 0.177257093 | 0.327979541 | no |
| YBX2         | -0.075025798 | -1.352189732 | 0.177260607 | 0.327979541 | no |
| BTF3         | -0.075023367 | -1.352145656 | 0.17727469  | 0.327979541 | no |
| IER5         | 0.075004039  | 1.351795349  | 0.177386643 | 0.328156213 | no |
| FGGY         | 0.07500161   | 1.351751313  | 0.17740072  | 0.328156213 | no |
| RASL11B      | -0.074997465 | -1.351676192 | 0.177424737 | 0.328170399 | no |
| PLAA         | 0.074995016  | 1.3516318    | 0.17743893  | 0.328170399 | no |
| LIPJ         | 0.074984551  | 1.351442133  | 0.17749958  | 0.328254322 | no |
| KRTAP23-1    | -0.074981165 | -1.351380752 | 0.177519212 | 0.32826238  | no |
| RXFP1        | -0.074976181 | -1.351290426 | 0.177548104 | 0.328274921 | no |
| AMD1         | 0.074974726  | 1.351264041  | 0.177556544 | 0.328274921 | no |
| C1orf146     | -0.074969975 | -1.351177934 | 0.17758409  | 0.328297608 | no |
| NAALAD2      | 0.074962437  | 1.351041304  | 0.177627806 | 0.32832978  | no |
| AACS         | -0.074961705 | -1.351028048 | 0.177632048 | 0.32832978  | no |

|              |              |              |             |             |    |
|--------------|--------------|--------------|-------------|-------------|----|
| GSTP1        | 0.074954103  | 1.350890268  | 0.177676141 | 0.328383037 | no |
| MZT2B        | -0.074948873 | -1.350795462 | 0.177706486 | 0.328410878 | no |
| TTLL2        | -0.074938262 | -1.350603156 | 0.17776805  | 0.328496403 | no |
| WRN          | -0.074915711 | -1.350194411 | 0.177898957 | 0.328686495 | no |
| CAGE1        | -0.074913706 | -1.350158073 | 0.177910599 | 0.328686495 | no |
| PDE6A        | -0.074912637 | -1.350138709 | 0.177916802 | 0.328686495 | no |
| ZNF587B      | 0.074897779  | 1.349869412  | 0.178003095 | 0.328817647 | no |
| NDUFB3       | -0.07482588  | -1.348566292 | 0.178421103 | 0.329561489 | no |
| GPR1         | 0.074811537  | 1.348306335  | 0.178504579 | 0.329682271 | no |
| SMC1A        | -0.074809373 | -1.34826712  | 0.178517174 | 0.329682271 | no |
| CENPP        | 0.074794833  | 1.348003589  | 0.178601831 | 0.329810273 | no |
| RBBP8NL      | -0.074778559 | -1.347708629 | 0.178696621 | 0.329956961 | no |
| TMPRSS9      | -0.074769412 | -1.347542855 | 0.178749911 | 0.330027004 | no |
| SUN2         | -0.074754438 | -1.347271464 | 0.178837178 | 0.330159763 | no |
| PAQR3        | 0.074746095  | 1.347120262  | 0.178885812 | 0.330182393 | no |
| PTRH2        | -0.074745157 | -1.347103259 | 0.178891282 | 0.330182393 | no |
| HK1          | 0.074744429  | 1.347090062  | 0.178895528 | 0.330182393 | no |
| ASIC5        | 0.07473002   | 1.34682893   | 0.178979547 | 0.330309098 | no |
| SIGLEC12     | 0.07471612   | 1.346577007  | 0.179060631 | 0.330430365 | no |
| ZNF684       | 0.07470718   | 1.346414966  | 0.179112801 | 0.330498257 | no |
| ILF2         | -0.074673448 | -1.345803625 | 0.179309725 | 0.330833216 | no |
| SRSF4        | 0.074662169  | 1.345599213  | 0.179375606 | 0.330926358 | no |
| NBEAP1       | -0.074650939 | -1.345395686 | 0.17944122  | 0.331018991 | no |
| DKFZp566F094 | -0.074639271 | -1.345184215 | 0.179509413 | 0.331110819 | no |
| KISS1R       | 0.074635888  | 1.345122901  | 0.179529189 | 0.331110819 | no |
| KCNJ2-AS1    | -0.074634514 | -1.345098005 | 0.179537219 | 0.331110819 | no |
| OCLM         | -0.074621955 | -1.344870391 | 0.179610649 | 0.331196068 | no |
| PROP1        | -0.074621336 | -1.344859183 | 0.179614265 | 0.331196068 | no |
| NHSL2        | 0.074606432  | 1.344589069  | 0.179701435 | 0.331328376 | no |
| NCL          | -0.074588986 | -1.344272883 | 0.179803515 | 0.331488147 | no |
| PINX1        | -0.074582528 | -1.344155844 | 0.179841311 | 0.331529389 | no |
| PLEKHH2      | -0.074561203 | -1.343769376 | 0.179966158 | 0.331731084 | no |
| GBAS         | -0.074557806 | -1.343707809 | 0.179986054 | 0.331739304 | no |
| LOC648691    | -0.074523767 | -1.343090911 | 0.180185491 | 0.332074609 | no |
| PUS3         | -0.074520214 | -1.343026518 | 0.180206319 | 0.332074609 | no |
| PLEKHB2      | 0.074518847  | 1.343001751  | 0.18021433  | 0.332074609 | no |
| EVX1         | -0.074500385 | -1.342667162 | 0.180322582 | 0.332245593 | no |
| CHRNA7       | -0.07447877  | -1.342275439 | 0.18044938  | 0.332450718 | no |
| C1orf229     | -0.074469292 | -1.342103669 | 0.180505002 | 0.332482383 | no |
| HIF1AN       | -0.074467217 | -1.342066073 | 0.180517178 | 0.332482383 | no |
| LOC100128822 | -0.074467128 | -1.342064458 | 0.180517701 | 0.332482383 | no |
| ITM2C        | 0.074465297  | 1.342031268  | 0.18052845  | 0.332482383 | no |
| CCDC63       | -0.07444162  | -1.341602187 | 0.180667463 | 0.332709892 | no |
| HIST1H2AI    | 0.07443564   | 1.341493817  | 0.180702585 | 0.332746059 | no |
| LOC100288846 | -0.074423892 | -1.341280916 | 0.1807716   | 0.332844624 | no |
| CTSL2        | -0.074414208 | -1.341105415 | 0.180828506 | 0.332920879 | no |
| CHIT1        | 0.074407771  | 1.340988749  | 0.180866342 | 0.332962014 | no |
| SUDS3        | -0.074351923 | -1.339976647 | 0.181194826 | 0.333538159 | no |
| POLR2B       | -0.074327585 | -1.339535605 | 0.181338108 | 0.333755685 | no |
| NDUFAF7      | 0.074326575  | 1.339517297  | 0.181344057 | 0.333755685 | no |
| ZBED1        | 0.074319039  | 1.339380723  | 0.181388445 | 0.333808791 | no |

|              |              |              |             |             |    |
|--------------|--------------|--------------|-------------|-------------|----|
| TRMT10A      | -0.074306464 | -1.339152837 | 0.181462527 | 0.333914498 | no |
| DAZAP2       | 0.074304014  | 1.339108448  | 0.18147696  | 0.333914498 | no |
| FOXN3-AS2    | -0.074290238 | -1.338858798 | 0.181558148 | 0.334035284 | no |
| RPP25        | 0.074280184  | 1.338676585  | 0.181617422 | 0.334115734 | no |
| MCMBP        | 0.07427452   | 1.338573944  | 0.181650817 | 0.334148567 | no |
| CPAMD8       | -0.074263604 | -1.338376134 | 0.18171519  | 0.334212418 | no |
| F5           | -0.07426336  | -1.338371709 | 0.18171663  | 0.334212418 | no |
| PBX1         | -0.074258939 | -1.338291596 | 0.181742706 | 0.334231773 | no |
| LOC388942    | 0.074244975  | 1.338038535  | 0.181825093 | 0.334346147 | no |
| TRAK2        | 0.074238968  | 1.337929682  | 0.181860541 | 0.334346147 | no |
| SPRR1A       | -0.074238187 | -1.337915526 | 0.181865151 | 0.334346147 | no |
| KLHL4        | 0.074237852  | 1.337909453  | 0.181867129 | 0.334346147 | no |
| PRRT3        | -0.074231562 | -1.337795475 | 0.181904251 | 0.334385789 | no |
| WNT6         | -0.07422653  | -1.337704277 | 0.181933958 | 0.334411794 | no |
| PCDHA11      | -0.074194302 | -1.337120258 | 0.182124284 | 0.334733002 | no |
| MFSD9        | 0.074188203  | 1.337009724  | 0.182160323 | 0.334770609 | no |
| BOK          | -0.074179102 | -1.336844808 | 0.182214102 | 0.33484081  | no |
| SMYD1        | -0.074145194 | -1.336230348 | 0.182414582 | 0.335180556 | no |
| LOC100506195 | -0.074139051 | -1.336119016 | 0.182450924 | 0.335199554 | no |
| FLJ25363     | -0.074138173 | -1.336103114 | 0.182456116 | 0.335199554 | no |
| FBXL18       | -0.074132488 | -1.33600009  | 0.182489751 | 0.33523269  | no |
| PLEKHM1      | 0.074107871  | 1.335553998  | 0.182635445 | 0.335459932 | no |
| ZBTB21       | 0.074105084  | 1.335503501  | 0.182651943 | 0.335459932 | no |
| NARF         | -0.074103676 | -1.335477978 | 0.182660282 | 0.335459932 | no |
| TMEM187      | 0.074079901  | 1.335047155  | 0.182801086 | 0.33565012  | no |
| POLR3GL      | -0.074078919 | -1.33502935  | 0.182806907 | 0.33565012  | no |
| CCDC61       | 0.074078279  | 1.335017761  | 0.182810695 | 0.33565012  | no |
| LOC283440    | -0.074061975 | -1.334722318 | 0.182907304 | 0.335774005 | no |
| ANKRD20A11P  | -0.074061619 | -1.33471586  | 0.182909417 | 0.335774005 | no |
| CXCL5        | 0.074049536  | 1.334496908  | 0.182981038 | 0.335876793 | no |
| LOC100128176 | -0.07404578  | -1.334428835 | 0.18300331  | 0.335888986 | no |
| RUVBL2       | -0.074024423 | -1.33404183  | 0.183129966 | 0.33609275  | no |
| TNFAIP8L1    | 0.074021419  | 1.3339874    | 0.183147785 | 0.33609675  | no |
| SH3GL1P1     | -0.074016123 | -1.333891418 | 0.183179209 | 0.336125716 | no |
| FGFBP2       | 0.074012714  | 1.333829659  | 0.183199431 | 0.336134123 | no |
| STAM         | -0.074009798 | -1.333776811 | 0.183216737 | 0.336137178 | no |
| PSMD6        | 0.074006907  | 1.333724418  | 0.183233895 | 0.336139961 | no |
| EIF2AK2      | 0.074000323  | 1.333605108  | 0.183272972 | 0.336182949 | no |
| PHF14        | -0.073942677 | -1.332560524 | 0.18361536  | 0.336772902 | no |
| TSPY1        | -0.073940898 | -1.332528298 | 0.18362593  | 0.336772902 | no |
| PRR14        | -0.073935961 | -1.332438833 | 0.183655278 | 0.336797985 | no |
| IDH3G        | -0.073920953 | -1.33216687  | 0.183744513 | 0.336932878 | no |
| DUPD1        | -0.073887941 | -1.331568688 | 0.183940899 | 0.337264215 | no |
| PREX1        | 0.073878454  | 1.331396769  | 0.18399737  | 0.337338976 | no |
| GORASP2      | -0.073871762 | -1.331275524 | 0.184037204 | 0.337383225 | no |
| ZNF28        | 0.073826572  | 1.330456669  | 0.184306395 | 0.337847897 | no |
| TEX264       | 0.073816963  | 1.330282543  | 0.184363675 | 0.337924072 | no |
| DDT          | -0.073809643 | -1.330149903 | 0.184407317 | 0.337975239 | no |
| SEC22A       | 0.073806484  | 1.330092666  | 0.184426152 | 0.337980936 | no |
| THG1L        | 0.073791709  | 1.329824945  | 0.184514269 | 0.338105568 | no |
| MIR17HG      | -0.073789805 | -1.32979045  | 0.184525625 | 0.338105568 | no |

|           |              |              |             |             |    |
|-----------|--------------|--------------|-------------|-------------|----|
| PARD3B    | -0.073786584 | -1.329732082 | 0.184544841 | 0.338111951 | no |
| APLP1     | -0.073772716 | -1.329480794 | 0.184627588 | 0.33823472  | no |
| CWH43     | 0.073757885  | 1.329212045  | 0.184716116 | 0.338368057 | no |
| PALM2     | -0.073745808 | -1.328993221 | 0.184788221 | 0.338471291 | no |
| KDM6B     | -0.073732657 | -1.328754924 | 0.184866766 | 0.338586303 | no |
| RSPH4A    | 0.073706724  | 1.328285027  | 0.185021723 | 0.338841231 | no |
| CNTNAP4   | -0.073698744 | -1.328140439 | 0.185069422 | 0.338899707 | no |
| MRPL21    | -0.073684619 | -1.327884497 | 0.18515388  | 0.339025478 | no |
| PRSS50    | -0.07366756  | -1.327575392 | 0.185255919 | 0.339153204 | no |
| LCE2D     | 0.073665332  | 1.327535032  | 0.185269246 | 0.339153204 | no |
| DQX1      | -0.073665043 | -1.327529783 | 0.185270979 | 0.339153204 | no |
| LINC00469 | 0.073655726  | 1.32736097   | 0.185326727 | 0.33922636  | no |
| ATXN7L1   | 0.073650605  | 1.327268184  | 0.185357374 | 0.339245208 | no |
| NDUFS6    | -0.073648731 | -1.327234214 | 0.185368595 | 0.339245208 | no |
| APEH      | 0.073646016  | 1.327185035  | 0.185384841 | 0.33924605  | no |
| SHE       | 0.073642704  | 1.327125008  | 0.185404671 | 0.339253452 | no |
| NDUFAF1   | -0.073624047 | -1.326786964 | 0.185516378 | 0.339428953 | no |
| LGALS14   | 0.073614231  | 1.326609103  | 0.185575173 | 0.339507622 | no |
| TTC17     | -0.073591999 | -1.326206281 | 0.185708382 | 0.339695808 | no |
| SCRIB     | -0.073591788 | -1.326202454 | 0.185709648 | 0.339695808 | no |
| PDE8B     | -0.073576158 | -1.32591925  | 0.185803344 | 0.339838269 | no |
| KRTAP20-1 | 0.073563905  | 1.325697247  | 0.185876816 | 0.33992395  | no |
| FAM195A   | -0.073562527 | -1.325672265 | 0.185885085 | 0.33992395  | no |
| AKNAD1    | -0.073560433 | -1.325634338 | 0.18589764  | 0.33992395  | no |
| MST1L     | -0.073555771 | -1.325549856 | 0.185925607 | 0.339946165 | no |
| SULF2     | -0.073547593 | -1.325401681 | 0.185974668 | 0.340006941 | no |
| TLX3      | -0.073531692 | -1.325113564 | 0.186070091 | 0.34015246  | no |
| SPACA4    | -0.073524456 | -1.324982463 | 0.186113522 | 0.340202918 | no |
| NOL10     | -0.073514567 | -1.324803282 | 0.186172895 | 0.340239745 | no |
| ZNF79     | 0.073513943  | 1.324791974  | 0.186176642 | 0.340239745 | no |
| PPP1CA    | 0.07351319   | 1.324778329  | 0.186181164 | 0.340239745 | no |
| PGAP3     | -0.073505835 | -1.324645061 | 0.186225333 | 0.340291526 | no |
| FLRT3     | -0.073493037 | -1.324413182 | 0.186302204 | 0.340397958 | no |
| LOC151475 | 0.073490864  | 1.324373817  | 0.186315256 | 0.340397958 | no |
| REM1      | -0.073477721 | -1.324135685 | 0.186394229 | 0.340506387 | no |
| RGS8      | -0.073475714 | -1.324099314 | 0.186406293 | 0.340506387 | no |
| OPN1SW    | -0.073468144 | -1.323962155 | 0.186451793 | 0.340560554 | no |
| PNMT      | -0.073460795 | -1.32382901  | 0.186495969 | 0.340612295 | no |
| PCDHA3    | -0.073434659 | -1.323355445 | 0.186653156 | 0.34087041  | no |
| PTENP1    | -0.073429923 | -1.323269646 | 0.186681646 | 0.34089347  | no |
| SLC04C1   | 0.073419696  | 1.323084352  | 0.186743183 | 0.340949931 | no |
| BTBD6     | -0.073417727 | -1.323048677 | 0.186755033 | 0.340949931 | no |
| NDUFA4    | -0.073416875 | -1.323033242 | 0.186760159 | 0.340949931 | no |
| INS       | -0.07341142  | -1.322934401 | 0.186792993 | 0.340965985 | no |
| PCDHB16   | -0.073409442 | -1.322898559 | 0.186804901 | 0.340965985 | no |
| PIR-FIGF  | 0.073407507  | 1.322863496  | 0.18681655  | 0.340965985 | no |
| SIN3B     | -0.073388042 | -1.322510833 | 0.186933747 | 0.341150913 | no |
| CYP2W1    | -0.073374548 | -1.322266344 | 0.187015028 | 0.341265944 | no |
| SH2D6     | -0.073372306 | -1.322225715 | 0.187028537 | 0.341265944 | no |
| CCL7      | 0.073359579  | 1.321995122  | 0.187105226 | 0.341376893 | no |
| COA4      | -0.073350222 | -1.321825586 | 0.187161624 | 0.341394351 | no |



|              |              |              |             |             |    |
|--------------|--------------|--------------|-------------|-------------|----|
| SEPP1        | 0.073350097  | 1.321823322  | 0.187162378 | 0.341394351 | no |
| ZBTB22       | -0.073348133 | -1.321787734 | 0.187174218 | 0.341394351 | no |
| GTF2IRD2     | -0.073347449 | -1.321775355 | 0.187178337 | 0.341394351 | no |
| IMPAD1       | -0.073341395 | -1.321665666 | 0.187214835 | 0.341431943 | no |
| KCNK1        | -0.073335997 | -1.321567858 | 0.187247384 | 0.341462328 | no |
| LOC285847    | -0.073318362 | -1.321248349 | 0.187353743 | 0.341627295 | no |
| DGCR11       | -0.073310265 | -1.321101651 | 0.187402591 | 0.341687375 | no |
| TMEM99       | -0.073303576 | -1.320980457 | 0.187442954 | 0.341703955 | no |
| PRSS8        | -0.073303488 | -1.320978863 | 0.187443485 | 0.341703955 | no |
| SPRR2F       | 0.073284202  | 1.320629429  | 0.187559897 | 0.341887172 | no |
| LOC253039    | -0.073268315 | -1.320341596 | 0.187655828 | 0.342016585 | no |
| SSBP2        | 0.073267174  | 1.320320914  | 0.187662723 | 0.342016585 | no |
| LOC100303749 | -0.073257425 | -1.320144293 | 0.187721608 | 0.342077677 | no |
| MON1B        | -0.073256354 | -1.320124888 | 0.187728078 | 0.342077677 | no |
| LOC100131257 | -0.073247182 | -1.319958708 | 0.187783496 | 0.342149649 | no |
| SOAT2        | 0.073235405  | 1.319745343  | 0.187854667 | 0.342250309 | no |
| SPAG16       | -0.073221523 | -1.319493829 | 0.187938589 | 0.342374181 | no |
| DDX59        | 0.073209873  | 1.319282747  | 0.188009041 | 0.342473496 | no |
| ZFP42        | -0.073202873 | -1.319155928 | 0.188051379 | 0.342521585 | no |
| TRNT1        | -0.073180475 | -1.318750141 | 0.188186895 | 0.342710827 | no |
| SPCS1        | 0.07318043   | 1.318749319  | 0.18818717  | 0.342710827 | no |
| NOTCH4       | 0.073169357  | 1.318548707  | 0.188254193 | 0.342803835 | no |
| ZNF442       | -0.073144455 | -1.318099265 | 0.188404412 | 0.343048312 | no |
| FAM95B1      | -0.073119703 | -1.317649093 | 0.188554965 | 0.343293355 | no |
| ZBTB48       | -0.073108663 | -1.317449092 | 0.188621881 | 0.343386094 | no |
| CHMP4A       | 0.073103509  | 1.317355707  | 0.188653131 | 0.343413895 | no |
| UHRF1        | -0.073084187 | -1.317005652 | 0.188770308 | 0.343598094 | no |
| SLC35F2      | 0.073070204  | 1.316752312  | 0.188855145 | 0.343723401 | no |
| CARTPT       | -0.073046466 | -1.316322252 | 0.188999224 | 0.343956502 | no |
| TULP2        | 0.07303999   | 1.316204929  | 0.189038544 | 0.343998929 | no |
| ARIH2OS      | -0.073033556 | -1.316088366 | 0.189077615 | 0.344025271 | no |
| NXT2         | -0.073029571 | -1.316016172 | 0.189101817 | 0.344025271 | no |
| LETM2        | -0.073028063 | -1.315988842 | 0.18911098  | 0.344025271 | no |
| PRRG4        | 0.073027063  | 1.315970733  | 0.189117051 | 0.344025271 | no |
| TAF4B        | -0.073022035 | -1.315879637 | 0.189147595 | 0.344051711 | no |
| VTI1B        | -0.073003262 | -1.315539539 | 0.189261659 | 0.344230054 | no |
| ANKRD46      | -0.072996869 | -1.315423715 | 0.189300517 | 0.344271592 | no |
| SNORA14A     | -0.072993315 | -1.315359326 | 0.189322121 | 0.344281748 | no |
| ZDBF2        | -0.072990484 | -1.31530804  | 0.18933933  | 0.344283911 | no |
| DHX36        | -0.072930259 | -1.314216952 | 0.189705721 | 0.344920952 | no |
| KIAA0100     | 0.072899849  | 1.313666037  | 0.189890919 | 0.34522847  | no |
| ZNF706       | 0.072894172  | 1.313563198  | 0.189925505 | 0.345232334 | no |
| TDGF1        | -0.072893762 | -1.313555763 | 0.189928005 | 0.345232334 | no |
| PIDD         | -0.072889727 | -1.313482662 | 0.189952593 | 0.345232334 | no |
| C2orf81      | 0.072888954  | 1.313468666  | 0.189957301 | 0.345232334 | no |
| TMEM92       | -0.072864752 | -1.313030213 | 0.190104827 | 0.345464192 | no |
| ISLR2        | -0.072862752 | -1.312993971 | 0.190117025 | 0.345464192 | no |
| DDX56        | 0.072846199  | 1.312694104  | 0.190217975 | 0.345618406 | no |
| GYPE         | 0.072823779  | 1.312287935  | 0.190354775 | 0.345837727 | no |
| BAGE         | 0.072802574  | 1.311903786  | 0.190484225 | 0.346043658 | no |
| HN1          | -0.072788724 | -1.311652871 | 0.190568813 | 0.346168064 | no |

|           |              |              |             |             |    |
|-----------|--------------|--------------|-------------|-------------|----|
| SDHAP1    | -0.072756619 | -1.311071255 | 0.190764994 | 0.346493652 | no |
| SLC10A1   | -0.072754115 | -1.311025901 | 0.190780298 | 0.346493652 | no |
| COL9A3    | -0.072751477 | -1.310978117 | 0.190796423 | 0.346493657 | no |
| TCF15     | -0.072729151 | -1.310573665 | 0.190932951 | 0.346712298 | no |
| RECQL5    | -0.072724613 | -1.310491447 | 0.190960713 | 0.346733414 | no |
| TANC1     | 0.072712714  | 1.310275887  | 0.191033515 | 0.346816176 | no |
| APOA1BP   | 0.072711888  | 1.310260925  | 0.191038569 | 0.346816176 | no |
| C4orf47   | 0.07270804   | 1.310191208  | 0.19106212  | 0.346829632 | no |
| MIR1248   | 0.072704189  | 1.310121454  | 0.191085685 | 0.346843113 | no |
| TNFSF9    | 0.072693652  | 1.309930567  | 0.191150185 | 0.346901682 | no |
| C22orf46  | -0.072693643 | -1.309930415 | 0.191150236 | 0.346901682 | no |
| BPIFA4P   | 0.072685839  | 1.309789029  | 0.19119802  | 0.346959101 | no |
| CHCHD1    | -0.072668979 | -1.309483602 | 0.191301274 | 0.347117162 | no |
| OPRK1     | -0.072617642 | -1.308553609 | 0.191615925 | 0.347658746 | no |
| OR3A3     | -0.072608541 | -1.308388742 | 0.191671746 | 0.347730668 | no |
| LINC00499 | -0.072593704 | -1.308119974 | 0.191762771 | 0.34786644  | no |
| PCP4      | -0.072587823 | -1.308013435 | 0.191798862 | 0.347902544 | no |
| DEFA9P    | -0.072573444 | -1.307752952 | 0.191887124 | 0.348033267 | no |
| LIPT1     | -0.072566386 | -1.307625104 | 0.191930455 | 0.348082481 | no |
| RBM3      | 0.072550978  | 1.30734599   | 0.192025079 | 0.348224704 | no |
| NAT10     | -0.072543501 | -1.307210541 | 0.19207101  | 0.34827861  | no |
| FAM99B    | -0.072529109 | -1.306949818 | 0.192159446 | 0.348409572 | no |
| SPA17     | 0.07252277   | 1.306834989  | 0.192198405 | 0.348450812 | no |
| IKBKB     | 0.072515535  | 1.306703931  | 0.192242877 | 0.348502039 | no |
| PITHD1    | -0.072500685 | -1.306434922 | 0.192334184 | 0.348638154 | no |
| FAM13B    | 0.072486394  | 1.306176043  | 0.192422084 | 0.348768069 | no |
| CCDC170   | 0.072457788  | 1.305657851  | 0.192598118 | 0.349057696 | no |
| LMO1      | -0.072450563 | -1.305526976 | 0.192642597 | 0.349077358 | no |
| ZNF18     | 0.07244902   | 1.305499026  | 0.192652097 | 0.349077358 | no |
| AHCTF1    | -0.07244811  | -1.305482552 | 0.192657696 | 0.349077358 | no |
| POGLUT1   | 0.072438506  | 1.305308573  | 0.192716838 | 0.349155081 | no |
| TMEM47    | -0.072385981 | -1.304357107 | 0.193040517 | 0.349712025 | no |
| DHX8      | 0.072381504  | 1.304276014  | 0.193068123 | 0.349728547 | no |
| ARGLU1    | -0.072379224 | -1.304234711 | 0.193082184 | 0.349728547 | no |
| NUP50     | -0.072358339 | -1.303856393 | 0.193211016 | 0.349932407 | no |
| NDUFA11   | -0.072349122 | -1.30368943  | 0.193267893 | 0.350005923 | no |
| GPN1      | -0.072339854 | -1.303521551 | 0.193325095 | 0.350080015 | no |
| SLC38A2   | 0.072333493  | 1.303406335  | 0.19336436  | 0.350100064 | no |
| C9orf57   | -0.072332783 | -1.303393462 | 0.193368748 | 0.350100064 | no |
| LOC283585 | 0.07232567   | 1.30326462   | 0.193412664 | 0.350150078 | no |
| PCCA      | -0.072319175 | -1.303146961 | 0.193452775 | 0.350193194 | no |
| KRBOX1    | 0.072312685  | 1.303029405  | 0.193492858 | 0.350236251 | no |
| KIF9      | 0.072271622  | 1.302285596  | 0.193746611 | 0.350666027 | no |
| TMX2      | -0.072246001 | -1.301821499 | 0.193905064 | 0.350923261 | no |
| RAET1K    | 0.072227337  | 1.30148342   | 0.194020551 | 0.3511027   | no |
| DPPA3     | -0.072220511 | -1.301359778 | 0.1940628   | 0.351149586 | no |
| MPND      | -0.072210616 | -1.301180538 | 0.194124058 | 0.351230859 | no |
| LINC00674 | -0.072202324 | -1.301030336 | 0.194175404 | 0.351294183 | no |
| DHRS1     | 0.072177015  | 1.30057191   | 0.194332175 | 0.351548213 | no |
| NDUFA7    | -0.072173192 | -1.300502659 | 0.194355865 | 0.351561476 | no |
| NDUFA1    | -0.072134218 | -1.299796695 | 0.194597493 | 0.351968922 | no |

|              |              |              |             |             |    |
|--------------|--------------|--------------|-------------|-------------|----|
| TPM3         | -0.072126152 | -1.299650603 | 0.194647523 | 0.352029784 | no |
| B4GALNT2     | -0.072109928 | -1.299356736 | 0.194748188 | 0.352182204 | no |
| KRI1         | -0.072105938 | -1.299284453 | 0.194772955 | 0.352197356 | no |
| CEACAM8      | -0.072091937 | -1.299030848 | 0.194859867 | 0.35232487  | no |
| DNAH1        | -0.072087258 | -1.298946095 | 0.194888919 | 0.352347755 | no |
| PPM1J        | 0.072080978  | 1.298832347  | 0.194927915 | 0.35237502  | no |
| CUL4B        | -0.072079548 | -1.298806454 | 0.194936792 | 0.35237502  | no |
| ZNF747       | 0.072075824  | 1.298738991  | 0.194959924 | 0.352387193 | no |
| ZCCHC3       | -0.072066358 | -1.298567543 | 0.195018719 | 0.35246382  | no |
| ASS1         | 0.072055375  | 1.298368598  | 0.19508696  | 0.352546913 | no |
| MRPL54       | -0.072053678 | -1.298337865 | 0.195097503 | 0.352546913 | no |
| TMUB1        | 0.072044267  | 1.298167408  | 0.195155988 | 0.352599141 | no |
| PLEKHJ1      | -0.072043748 | -1.298157993 | 0.195159219 | 0.352599141 | no |
| TUBGCP5      | -0.07203993  | -1.298088842 | 0.195182949 | 0.352612371 | no |
| LOC401242    | -0.072035299 | -1.29800497  | 0.195211734 | 0.35263473  | no |
| NOMO2        | -0.072026156 | -1.297839351 | 0.195268584 | 0.35268802  | no |
| SCNN1B       | 0.072025276  | 1.297823411  | 0.195274056 | 0.35268802  | no |
| KRTAP9-9     | -0.07202094  | -1.297744879 | 0.195301018 | 0.352707073 | no |
| PSMC3IP      | -0.072015205 | -1.297641004 | 0.195336684 | 0.352741843 | no |
| BRCA1        | 0.072005009  | 1.297456323  | 0.195400108 | 0.352826728 | no |
| LINC00442    | -0.071997687 | -1.297323693 | 0.195445665 | 0.35287934  | no |
| NPIPL3       | -0.071970864 | -1.296837865 | 0.19561261  | 0.353151092 | no |
| LOC442132    | -0.071938037 | -1.296243283 | 0.195817069 | 0.353473998 | no |
| ZCCHC7       | -0.071934609 | -1.296181179 | 0.195838434 | 0.353473998 | no |
| XG           | 0.071932025  | 1.296134387  | 0.195854532 | 0.353473998 | no |
| NDUFC2-KCTD1 | -0.071931588 | -1.296126462 | 0.195857259 | 0.353473998 | no |
| LOC100126784 | 0.071928058  | 1.296062529  | 0.195879257 | 0.353484012 | no |
| CAPN9        | -0.071922833 | -1.295967896 | 0.19591182  | 0.353513092 | no |
| MRPL52       | -0.071908114 | -1.295701292 | 0.196003581 | 0.353648977 | no |
| ISPD         | 0.071891258  | 1.295395986  | 0.196108702 | 0.353808941 | no |
| CDKN2AIP     | -0.071882232 | -1.2952325   | 0.196165009 | 0.35388082  | no |
| ZSCAN32      | -0.071878726 | -1.295169009 | 0.19618688  | 0.353890568 | no |
| CCDC19       | 0.071868849  | 1.294990103  | 0.196248516 | 0.353927577 | no |
| LOC340107    | -0.071864323 | -1.294908128 | 0.196276763 | 0.353927577 | no |
| MAP4         | -0.071863643 | -1.29489582  | 0.196281005 | 0.353927577 | no |
| IRX3         | -0.071863603 | -1.294895094 | 0.196281255 | 0.353927577 | no |
| C1orf173     | 0.071862244  | 1.294870473  | 0.196289739 | 0.353927577 | no |
| TMEM116      | -0.07185583  | -1.294754308 | 0.196329775 | 0.353944262 | no |
| UBE2C        | -0.071855485 | -1.294748048 | 0.196331932 | 0.353944262 | no |
| OCA2         | -0.071818791 | -1.294083454 | 0.196561095 | 0.354327671 | no |
| PIGN         | 0.071806985  | 1.293869609  | 0.196634874 | 0.354406038 | no |
| LOC100505659 | -0.071806557 | -1.293861854 | 0.19663755  | 0.354406038 | no |
| A4GNT        | 0.071802802  | 1.293793845  | 0.196661019 | 0.354418612 | no |
| OSBPL10-AS1  | 0.071780229  | 1.293385016  | 0.19680214  | 0.354643199 | no |
| SNORA16A     | 0.071720308  | 1.292299731  | 0.197177125 | 0.355289142 | no |
| RAPGEF5      | -0.071679914 | -1.291568123 | 0.197430205 | 0.355715336 | no |
| OR2M1P       | -0.071656135 | -1.291137444 | 0.197579298 | 0.35595412  | no |
| FAM83E       | -0.07164551  | -1.290945009 | 0.197645942 | 0.356044337 | no |
| KCNJ1        | -0.071639363 | -1.290833686 | 0.197684504 | 0.356083955 | no |
| SMAP2        | 0.071632754  | 1.29071399   | 0.197725971 | 0.3561288   | no |
| ZBBX         | 0.071627825  | 1.290624709  | 0.197756906 | 0.356154668 | no |

|              |              |              |             |             |    |
|--------------|--------------|--------------|-------------|-------------|----|
| KRTAP4-1     | -0.071616897 | -1.290426793 | 0.197825493 | 0.356213922 | no |
| NDUFB6       | -0.071615666 | -1.290404491 | 0.197833223 | 0.356213922 | no |
| HOXD-AS1     | -0.071614661 | -1.290386292 | 0.197839531 | 0.356213922 | no |
| SRSF5        | -0.07160144  | -1.290146837 | 0.197922542 | 0.356333531 | no |
| ZNF705A      | -0.071597121 | -1.290068618 | 0.197949664 | 0.356352507 | no |
| SLC9A5       | -0.071582802 | -1.289809288 | 0.198039603 | 0.356484555 | no |
| ATPIF1       | -0.071571386 | -1.289602524 | 0.198111333 | 0.356583806 | no |
| WFDC3        | -0.071562815 | -1.289447302 | 0.198165194 | 0.356650883 | no |
| FBX042       | 0.071539093  | 1.289017673  | 0.198314331 | 0.356889406 | no |
| RIC8B        | -0.071531116 | -1.288873197 | 0.198364501 | 0.356949803 | no |
| LINC00254    | -0.071508863 | -1.288470168 | 0.198504505 | 0.357165104 | no |
| AGR3         | 0.071506816  | 1.288433094  | 0.198517387 | 0.357165104 | no |
| MIF          | 0.071501543  | 1.288337592  | 0.198550574 | 0.35719491  | no |
| TMEM235      | -0.07149244  | -1.288172727 | 0.198607876 | 0.357268089 | no |
| MS4A15       | -0.071487972 | -1.288091822 | 0.198636    | 0.357288775 | no |
| KATNA1       | 0.071482708  | 1.287996472  | 0.198669149 | 0.357318494 | no |
| RAD51AP1     | 0.071447211  | 1.2873536    | 0.198892756 | 0.357690729 | no |
| C11orf86     | 0.071438349  | 1.287193108  | 0.198948608 | 0.357761236 | no |
| ARHGEF6      | 0.07142658   | 1.286979953  | 0.199022804 | 0.357864716 | no |
| FLJ36777     | 0.071406347  | 1.28661353   | 0.199150399 | 0.358064186 | no |
| LOC644248    | -0.071398515 | -1.286471696 | 0.199199804 | 0.358123054 | no |
| MAP2K2       | -0.071389249 | -1.28630388  | 0.199258271 | 0.358190036 | no |
| VEPH1        | -0.071387328 | -1.286269084 | 0.199270395 | 0.358190036 | no |
| TSSK1B       | -0.071384183 | -1.286212127 | 0.199290243 | 0.358195752 | no |
| LOC100128292 | -0.071366465 | -1.285891256 | 0.199402083 | 0.358366797 | no |
| C16orf95     | -0.07136354  | -1.285838269 | 0.199420555 | 0.358370027 | no |
| LOC728613    | -0.071346084 | -1.28552215  | 0.199530791 | 0.358538147 | no |
| FAAH2        | -0.071329701 | -1.285225437 | 0.199634301 | 0.358694153 | no |
| CDKN2D       | -0.071322791 | -1.285100306 | 0.199677965 | 0.358742614 | no |
| SLC25A29     | -0.071316578 | -1.284987776 | 0.199717238 | 0.358783178 | no |
| LSP1P3       | -0.071311651 | -1.284898547 | 0.199748383 | 0.358783887 | no |
| NFIC         | 0.071311233  | 1.284890988  | 0.199751022 | 0.358783887 | no |
| ARHGEF25     | -0.071305168 | -1.284781147 | 0.199789366 | 0.358822771 | no |
| RPUSD2       | -0.071299002 | -1.284669485 | 0.199828353 | 0.3588628   | no |
| NDRG1        | 0.071284858  | 1.284413322  | 0.199917811 | 0.358993456 | no |
| LOC728084    | -0.07124844  | -1.283753792 | 0.200148272 | 0.359377267 | no |
| ATP2A1       | -0.071233687 | -1.28348662  | 0.200241685 | 0.359514959 | no |
| B9D1         | 0.071223333  | 1.28329911   | 0.200307265 | 0.359602659 | no |
| ARGFX        | -0.07120825  | -1.283025972 | 0.20040282  | 0.359744154 | no |
| ARHGAP19     | 0.071187157  | 1.28264397   | 0.200536517 | 0.359941352 | no |
| NPBWR1       | -0.071185634 | -1.282616396 | 0.200546171 | 0.359941352 | no |
| SEC24B       | -0.071170882 | -1.282349242 | 0.200639714 | 0.360079172 | no |
| LMOD1        | 0.071165596  | 1.282253515  | 0.20067324  | 0.360109269 | no |
| MCPH1        | 0.071158586  | 1.282126558  | 0.200717711 | 0.360151667 | no |
| LOC387723    | -0.071156588 | -1.282090384 | 0.200730383 | 0.360151667 | no |
| LOC400752    | -0.071153322 | -1.282031228 | 0.200751108 | 0.360158782 | no |
| KIAA0196     | 0.071146934  | 1.281915546  | 0.20079164  | 0.360173444 | no |
| CUTC         | -0.071146751 | -1.281912239 | 0.200792799 | 0.360173444 | no |
| C8orf33      | -0.071125881 | -1.281534288 | 0.200925266 | 0.360351678 | no |
| CBFB         | 0.071125813  | 1.281533058  | 0.200925697 | 0.360351678 | no |
| KIAA0513     | -0.071113361 | -1.281307556 | 0.201004764 | 0.3604634   | no |

|            |              |              |             |             |    |
|------------|--------------|--------------|-------------|-------------|----|
| FAM209A    | 0.071096217  | 1.280997098  | 0.201113655 | 0.360601693 | no |
| LGALS3     | 0.071095936  | 1.280992015  | 0.201115438 | 0.360601693 | no |
| TTLL5      | -0.071088789 | -1.280862587 | 0.201160848 | 0.360653022 | no |
| C19orf60   | 0.07107536   | 1.28061939   | 0.201246193 | 0.360757666 | no |
| EPN2-IT1   | 0.071074322  | 1.2806006    | 0.201252788 | 0.360757666 | no |
| GFPT1      | 0.07105747   | 1.280295423  | 0.201359923 | 0.360919609 | no |
| UBE2E3     | 0.071047006  | 1.280105925  | 0.201426469 | 0.360995594 | no |
| TNIP2      | 0.071045522  | 1.280079042  | 0.201435911 | 0.360995594 | no |
| UGT3A2     | 0.071026132  | 1.279727921  | 0.201559262 | 0.361186534 | no |
| APOBEC1    | -0.071021921 | -1.279651655 | 0.201586062 | 0.361187846 | no |
| TSR3       | -0.071020735 | -1.279630183 | 0.201593607 | 0.361187846 | no |
| OR10AD1    | 0.071016053  | 1.279545389  | 0.201623408 | 0.361211126 | no |
| LOC400958  | -0.071005384 | -1.279352193 | 0.201691318 | 0.361271545 | no |
| SGOL1-AS1  | 0.071004335  | 1.279333197  | 0.201697996 | 0.361271545 | no |
| RBM15      | 0.071002832  | 1.279305981  | 0.201707564 | 0.361271545 | no |
| ANKRD63    | 0.070999512  | 1.279245855  | 0.201728704 | 0.361277606 | no |
| MPP6       | -0.07099702  | -1.279200732 | 0.20174457  | 0.361277606 | no |
| SMG1P1     | -0.070986873 | -1.279016978 | 0.201809189 | 0.361363213 | no |
| ANKRD35    | -0.070975296 | -1.278807322 | 0.201882935 | 0.361454192 | no |
| OSBPL7     | -0.070973616 | -1.278776906 | 0.201893636 | 0.361454192 | no |
| UGT2B10    | -0.070962549 | -1.278576501 | 0.201964149 | 0.361549221 | no |
| WEE1       | 0.070960005  | 1.278530432  | 0.201980362 | 0.361549221 | no |
| CHRNA5     | 0.070935155  | 1.278080413  | 0.202138778 | 0.361781715 | no |
| WDR31      | -0.070934349 | -1.278065832 | 0.202143913 | 0.361781715 | no |
| LIN28B     | -0.0708913   | -1.277286275 | 0.202418554 | 0.36224308  | no |
| UFD1L      | -0.070885351 | -1.277178534 | 0.202456533 | 0.362280879 | no |
| C3orf58    | 0.070835005  | 1.276266859  | 0.202778111 | 0.362826109 | no |
| GDNF       | -0.070825936 | -1.276102635 | 0.202836078 | 0.362899614 | no |
| SPDYC      | -0.070797859 | -1.2755942   | 0.20301562  | 0.363190602 | no |
| BZRAP1-AS1 | -0.070789453 | -1.27544199  | 0.203069392 | 0.36325656  | no |
| COMMD7     | 0.070779517  | 1.275262059  | 0.203132971 | 0.363339193 | no |
| PTGER1     | 0.070776949  | 1.275215572  | 0.2031494   | 0.363339193 | no |
| ZCCHC12    | -0.070774138 | -1.275164658 | 0.203167394 | 0.363341138 | no |
| ASPA       | -0.070761048 | -1.274927631 | 0.203251179 | 0.363460734 | no |
| CXorf40B   | 0.07075166   | 1.274757621  | 0.203311292 | 0.363537979 | no |
| TMTC2      | 0.070731374  | 1.274390287  | 0.203441217 | 0.363740033 | no |
| CSF2       | 0.07072245   | 1.274228704  | 0.203498388 | 0.363811984 | no |
| SAP30      | 0.070714554  | 1.274085722  | 0.203548988 | 0.363872176 | no |
| GPR155     | 0.070707781  | 1.273963063  | 0.203592403 | 0.363919515 | no |
| C19orf47   | -0.070684886 | -1.273548492 | 0.203739189 | 0.364151606 | no |
| LOC150197  | 0.070679862  | 1.273457513  | 0.203771412 | 0.364178912 | no |
| KDEL1      | 0.070661267  | 1.273120803  | 0.203890701 | 0.364331877 | no |
| DARC       | 0.070661235  | 1.273120222  | 0.203890907 | 0.364331877 | no |
| PTPRN      | -0.070657593 | -1.273054288 | 0.203914272 | 0.364343334 | no |
| PABPC1P2   | -0.070635834 | -1.272660274 | 0.204053939 | 0.364559232 | no |
| BRPF1      | 0.070633483  | 1.272617707  | 0.204069032 | 0.364559232 | no |
| CGNL1      | 0.070614984  | 1.272282742  | 0.204187829 | 0.364741138 | no |
| AOAH-IT1   | 0.070597975  | 1.271974741  | 0.204297108 | 0.364906013 | no |
| LINC00189  | 0.070589894  | 1.271828414  | 0.20434904  | 0.364968438 | no |
| FAM210B    | 0.07057619   | 1.271580282  | 0.204437125 | 0.365095417 | no |
| TTC23L     | 0.070568575  | 1.271442398  | 0.204486084 | 0.365152508 | no |

|              |              |              |             |             |    |
|--------------|--------------|--------------|-------------|-------------|----|
| BCS1L        | -0.070549938 | -1.271104925 | 0.20460595  | 0.365329611 | no |
| PKIB         | -0.070547869 | -1.271067459 | 0.20461926  | 0.365329611 | no |
| LRTM1        | 0.070538077  | 1.270890159  | 0.204682258 | 0.365411731 | no |
| RNMTL1       | -0.070522676 | -1.270611294 | 0.204781373 | 0.365542467 | no |
| WDR34        | 0.070521413  | 1.270588412  | 0.204789507 | 0.365542467 | no |
| CRIP2        | -0.07050203  | -1.270237442 | 0.204914303 | 0.365714013 | no |
| TRIM6-TRIM34 | 0.0705012    | 1.270222415  | 0.204919648 | 0.365714013 | no |
| GSC          | 0.070491026  | 1.270038204  | 0.204985172 | 0.365800575 | no |
| ZNF215       | 0.070482682  | 1.269887121  | 0.205038923 | 0.365866116 | no |
| GTF2H4       | -0.070468766 | -1.269635143 | 0.205128594 | 0.365995734 | no |
| LMAN1L       | 0.070463137  | 1.269533211  | 0.205164877 | 0.366030082 | no |
| XAGE5        | -0.070426163 | -1.26886373  | 0.205403293 | 0.366425017 | no |
| RNF11        | -0.070417974 | -1.26871546  | 0.205456123 | 0.366462664 | no |
| RPS16        | -0.070415704 | -1.268674359 | 0.205470769 | 0.366462664 | no |
| KPNA2        | 0.070414963  | 1.268660935  | 0.205475553 | 0.366462664 | no |
| RAB2B        | 0.070411696  | 1.268601783  | 0.205496633 | 0.366469849 | no |
| MED23        | -0.070392305 | -1.268250671 | 0.205621794 | 0.366633758 | no |
| EEF1E1       | -0.07039217  | -1.268248229 | 0.205622665 | 0.366633758 | no |
| GAL3ST1      | -0.070385796 | -1.268132816 | 0.205663819 | 0.366676715 | no |
| LMBR1L       | -0.070358996 | -1.267647571 | 0.205836911 | 0.366954878 | no |
| LOC100506655 | -0.070353522 | -1.267548457 | 0.205872279 | 0.366987488 | no |
| DECR1        | -0.070346753 | -1.267425885 | 0.205916024 | 0.367035024 | no |
| TNS4         | 0.070332646  | 1.267170469  | 0.206007203 | 0.367146672 | no |
| PRDX1        | 0.070331776  | 1.26715471   | 0.206012829 | 0.367146672 | no |
| ARHGEF1      | -0.070321414 | -1.266967084 | 0.206079828 | 0.36723562  | no |
| FANCD2       | -0.070314401 | -1.266840109 | 0.206125178 | 0.367270181 | no |
| LINC00284    | -0.070313129 | -1.266817087 | 0.206133401 | 0.367270181 | no |
| PVRL3        | 0.07030679   | 1.266702303  | 0.206174405 | 0.367288558 | no |
| RAX2         | -0.07030625  | -1.266692531 | 0.206177896 | 0.367288558 | no |
| SOX13        | -0.070293781 | -1.266466758 | 0.206258565 | 0.367401809 | no |
| SLC2A8       | 0.07028377   | 1.266285495  | 0.206323348 | 0.367486746 | no |
| LOC151484    | 0.070279178  | 1.266202359  | 0.206353065 | 0.367509217 | no |
| ZNF584       | 0.070272287  | 1.266077587  | 0.206397672 | 0.3675582   | no |
| C19orf48     | -0.070265857 | -1.265961156 | 0.206439302 | 0.36757974  | no |
| IGFL2        | 0.070265135  | 1.26594809   | 0.206443975 | 0.36757974  | no |
| MIR212       | -0.070262128 | -1.265893642 | 0.206463445 | 0.367583953 | no |
| ANKZF1       | -0.070254729 | -1.265759674 | 0.206511358 | 0.367636713 | no |
| MKRN9P       | -0.070252268 | -1.265715126 | 0.206527292 | 0.367636713 | no |
| TMCC1        | -0.070248252 | -1.265642408 | 0.206553304 | 0.367652564 | no |
| NFIA         | -0.070245517 | -1.265592882 | 0.206571021 | 0.36765365  | no |
| TMLHE-AS1    | 0.070228523  | 1.265285192  | 0.206681119 | 0.367785366 | no |
| TBX5         | -0.070225932 | -1.265238284 | 0.206697907 | 0.367785366 | no |
| IL26         | 0.07022447   | 1.265211802  | 0.206707385 | 0.367785366 | no |
| C1orf111     | -0.070223529 | -1.26519477  | 0.206713482 | 0.367785366 | no |
| ACER3        | 0.070213105  | 1.265006043  | 0.206781041 | 0.367860157 | no |
| ISM2         | -0.070211762 | -1.264981712 | 0.206789752 | 0.367860157 | no |
| FKBP9L       | 0.070188584  | 1.264562052  | 0.20694004  | 0.368097038 | no |
| PTAR1        | 0.070183307  | 1.26446651   | 0.206974267 | 0.36812745  | no |
| SLC38A4      | 0.070178574  | 1.264380829  | 0.207004965 | 0.368151581 | no |
| FABP3        | -0.070162123 | -1.264082965 | 0.207111709 | 0.368280532 | no |
| U2AF1        | -0.070162118 | -1.264082864 | 0.207111745 | 0.368280532 | no |

|              |              |              |             |             |    |
|--------------|--------------|--------------|-------------|-------------|----|
| MYBL2        | -0.070152415 | -1.263907198 | 0.207174716 | 0.368362028 | no |
| ICAM4        | 0.070148204  | 1.263830955  | 0.207202052 | 0.368380153 | no |
| KLHL36       | 0.070142528  | 1.263728188  | 0.207238901 | 0.368415189 | no |
| GAS2L3       | 0.070132011  | 1.263537764  | 0.207307193 | 0.368503481 | no |
| BBS4         | -0.070129599 | -1.263494087 | 0.20732286  | 0.368503481 | no |
| POLR2J3      | -0.070122094 | -1.263358222 | 0.207371599 | 0.368559629 | no |
| LOC100131094 | 0.07011347   | 1.263202076  | 0.207427623 | 0.368628715 | no |
| RBM44        | 0.07010003   | 1.262958731  | 0.207514956 | 0.368753425 | no |
| GPER         | 0.070085384  | 1.262693568  | 0.20761015  | 0.368892082 | no |
| ANKRD20A4    | -0.070080118 | -1.262598222 | 0.207644387 | 0.368922414 | no |
| CDC26        | 0.070075695  | 1.26251814   | 0.207673146 | 0.368943009 | no |
| LOC729059    | -0.070071799 | -1.262447607 | 0.207698479 | 0.368957514 | no |
| CASP12       | 0.070041479  | 1.261898652  | 0.207895716 | 0.369226888 | no |
| SNORD15B     | -0.07003761  | -1.261828591 | 0.207920898 | 0.369226888 | no |
| KRTAP12-4    | -0.07003736  | -1.261824074 | 0.207922522 | 0.369226888 | no |
| C10orf99     | -0.07003629  | -1.261804701 | 0.207929486 | 0.369226888 | no |
| TXNRD1       | 0.070033036  | 1.261745774  | 0.207950669 | 0.369226888 | no |
| STX6         | -0.070032646 | -1.261738729 | 0.207953202 | 0.369226888 | no |
| IPO4         | 0.070029535  | 1.261682395  | 0.207973454 | 0.369232342 | no |
| MRE11A       | 0.070022412  | 1.261553425  | 0.208019825 | 0.369284161 | no |
| CCDC149      | -0.069970944 | -1.260621606 | 0.208355082 | 0.369848771 | no |
| REREP3       | -0.069958529 | -1.260396817 | 0.208436017 | 0.369949996 | no |
| RAB4A        | -0.069955743 | -1.260346376 | 0.208454181 | 0.369949996 | no |
| ABHD8        | -0.069954275 | -1.260319806 | 0.20846375  | 0.369949996 | no |
| CDK5RAP1     | 0.069948182  | 1.260209485  | 0.208503483 | 0.369989956 | no |
| C6orf120     | 0.06993163   | 1.259909813  | 0.208611441 | 0.370150965 | no |
| FBXL14       | -0.069927179 | -1.259829242 | 0.208640474 | 0.370171917 | no |
| EIF1AD       | 0.06991935   | 1.259687487  | 0.208691561 | 0.370231991 | no |
| WDR16        | 0.069906607  | 1.25945678   | 0.208774725 | 0.370348958 | no |
| CHMP1A       | -0.069901573 | -1.259365653 | 0.208807581 | 0.370376669 | no |
| FAM102B      | 0.069896371  | 1.259271466  | 0.208841544 | 0.370406339 | no |
| FUNDC2       | -0.069886848 | -1.259099046 | 0.208903727 | 0.370461626 | no |
| MIR204       | -0.069886317 | -1.259089441 | 0.208907191 | 0.370461626 | no |
| PIP4K2A      | -0.069881891 | -1.259009304 | 0.208936098 | 0.370482317 | no |
| HOXD-AS2     | -0.069877682 | -1.258933112 | 0.208963584 | 0.370500485 | no |
| CYP2B6       | -0.069869575 | -1.258786339 | 0.209016539 | 0.37055819  | no |
| LINC00620    | -0.069867421 | -1.258747331 | 0.209030615 | 0.37055819  | no |
| TESPA1       | -0.069847566 | -1.25838787  | 0.209160355 | 0.370737867 | no |
| KLHL40       | -0.06984663  | -1.258370927 | 0.209166472 | 0.370737867 | no |
| DEFB1        | 0.069841449  | 1.258277127  | 0.209200337 | 0.370767313 | no |
| ETFA         | -0.06982856  | -1.258043766 | 0.209284607 | 0.37088608  | no |
| HTR1B        | -0.069820254 | -1.257893396 | 0.209338921 | 0.370951744 | no |
| LOC344595    | 0.069817579  | 1.257844972  | 0.209356414 | 0.370952155 | no |
| LOC400680    | -0.069812611 | -1.257755036 | 0.209388906 | 0.370979141 | no |
| SNORA16B     | 0.069790064  | 1.257346831  | 0.209536427 | 0.371209905 | no |
| USP14        | 0.069785949  | 1.257272326  | 0.209563361 | 0.371227019 | no |
| BEGAIN       | 0.069775489  | 1.257082967  | 0.209631826 | 0.371317692 | no |
| GLIS3-AS1    | -0.069771094 | -1.257003395 | 0.2096606   | 0.371338055 | no |
| SLC19A2      | -0.069763357 | -1.256863323 | 0.209711261 | 0.371397174 | no |
| COX8A        | -0.069758583 | -1.256776893 | 0.209742524 | 0.371403321 | no |
| UTS2R        | -0.069757549 | -1.256758174 | 0.209749296 | 0.371403321 | no |

|              |              |              |             |             |    |
|--------------|--------------|--------------|-------------|-------------|----|
| CCDC162P     | 0.069740976  | 1.256458124  | 0.209857859 | 0.371564941 | no |
| ZNF317       | -0.069737803 | -1.256400677 | 0.209878649 | 0.371571139 | no |
| TERC         | -0.069730433 | -1.25626726  | 0.209926939 | 0.371626017 | no |
| C5orf55      | 0.069724432  | 1.256158613  | 0.209966269 | 0.371630099 | no |
| C18orf54     | -0.0697231   | -1.256134498 | 0.209974999 | 0.371630099 | no |
| SRD5A3-AS1   | -0.069722166 | -1.256117586 | 0.209981122 | 0.371630099 | no |
| KCNN3        | 0.069712931  | 1.255950396  | 0.210041658 | 0.371689193 | no |
| RPL32P3      | -0.069711795 | -1.255929839 | 0.210049102 | 0.371689193 | no |
| CCNE1        | 0.069700621  | 1.255727532  | 0.210122372 | 0.371758566 | no |
| PXMP4        | 0.06970054   | 1.255726067  | 0.210122903 | 0.371758566 | no |
| ARL14EP      | -0.069690941 | -1.255552296 | 0.210185853 | 0.371839329 | no |
| CRTC2        | 0.069684835  | 1.255441753  | 0.210225905 | 0.371879572 | no |
| LEF1-AS1     | 0.069660293  | 1.254997451  | 0.210386942 | 0.372133808 | no |
| NMUR2        | -0.069648024 | -1.254775323 | 0.210467486 | 0.372245637 | no |
| TAC3         | -0.069635078 | -1.254540959 | 0.21055249  | 0.372365337 | no |
| VEGFB        | 0.06960069   | 1.253918415  | 0.210778411 | 0.372705839 | no |
| EFCAB6       | 0.069600492  | 1.253914834  | 0.210779711 | 0.372705839 | no |
| OR10G3       | -0.06959035  | -1.253731216 | 0.210846379 | 0.372793051 | no |
| LOC388906    | 0.069583816  | 1.253612924  | 0.210889337 | 0.372838331 | no |
| LINC00293    | -0.069576183 | -1.25347474  | 0.210939527 | 0.372896388 | no |
| ADRA1B       | -0.069570193 | -1.253366308 | 0.210978917 | 0.372911559 | no |
| SH3RF3       | -0.069569601 | -1.253355582 | 0.210982814 | 0.372911559 | no |
| CARS2        | 0.069565721  | 1.253285347  | 0.211008331 | 0.37292182  | no |
| PRICKLE4     | -0.069563441 | -1.253244082 | 0.211023324 | 0.37292182  | no |
| POTEE        | -0.06955414  | -1.253075686 | 0.211084517 | 0.372999289 | no |
| RHEB         | -0.069542442 | -1.252863918 | 0.211161488 | 0.373104624 | no |
| SLC6A11      | -0.069535481 | -1.252737908 | 0.211207299 | 0.373154888 | no |
| LOC100128076 | 0.069525793  | 1.252562522  | 0.211271072 | 0.373236877 | no |
| LOC100506305 | -0.069521419 | -1.252483341 | 0.211299868 | 0.373257067 | no |
| MKNK1-AS1    | 0.069516155  | 1.252388037  | 0.211334532 | 0.373287616 | no |
| BTBD18       | -0.069495293 | -1.25201036  | 0.211471939 | 0.373499625 | no |
| LINC00264    | 0.069486651  | 1.25185392   | 0.211528874 | 0.373569483 | no |
| TLE2         | -0.069473957 | -1.251624124 | 0.211612527 | 0.373661049 | no |
| SCARNA4      | -0.069473507 | -1.251615969 | 0.211615496 | 0.373661049 | no |
| SMEK2        | 0.069469208  | 1.25153814   | 0.211643834 | 0.373680384 | no |
| MED19        | -0.069466563 | -1.251490264 | 0.211661267 | 0.373680465 | no |
| TIMM9        | -0.069452473 | -1.251235195 | 0.211754164 | 0.373813762 | no |
| LOC257396    | -0.06944113  | -1.251029851 | 0.211828972 | 0.373885269 | no |
| CDH7         | -0.069441055 | -1.251028498 | 0.211829465 | 0.373885269 | no |
| AFAP1        | -0.069420317 | -1.25065308  | 0.211966282 | 0.374096032 | no |
| LRRC23       | 0.069386849  | 1.250047215  | 0.212187219 | 0.374455208 | no |
| VARS2        | -0.069358777 | -1.249539028 | 0.212372665 | 0.374751699 | no |
| DMBT1        | -0.06934694  | -1.249324745 | 0.212450896 | 0.374858965 | no |
| LOC100131138 | 0.069331475  | 1.249044784  | 0.212553136 | 0.375008574 | no |
| BREA2        | -0.069326832 | -1.248960734 | 0.212583837 | 0.375031952 | no |
| LINC00299    | 0.069316361  | 1.248771181  | 0.212653088 | 0.375123329 | no |
| ATP8B2       | 0.069300871  | 1.248490782  | 0.212755559 | 0.375273286 | no |
| NEUROG2      | -0.069293229 | -1.248352442 | 0.212806128 | 0.375331677 | no |
| PTCSC3       | -0.069248517 | -1.247543053 | 0.213102167 | 0.375822967 | no |
| LOC100507206 | -0.069234209 | -1.247284051 | 0.213196962 | 0.375959294 | no |
| PGC          | -0.069227606 | -1.247164508 | 0.213240725 | 0.376005614 | no |



|              |              |              |             |             |    |
|--------------|--------------|--------------|-------------|-------------|----|
| MYH2         | -0.069223116 | -1.247083229 | 0.213270484 | 0.376027236 | no |
| ASB16-AS1    | 0.069192919  | 1.246536607  | 0.213470699 | 0.376349367 | no |
| WDR73        | 0.069181672  | 1.246333012  | 0.213545305 | 0.376450017 | no |
| GSK3B        | -0.069177917 | -1.246265045 | 0.213570216 | 0.37646305  | no |
| OR7E91P      | -0.069163157 | -1.245997856 | 0.213668163 | 0.376604814 | no |
| BSX          | -0.069159579 | -1.24593308  | 0.213691914 | 0.376615789 | no |
| LINC00323    | -0.0691547   | -1.245844777 | 0.213724294 | 0.376630893 | no |
| GMPPA        | 0.069153007  | 1.245814127  | 0.213735534 | 0.376630893 | no |
| ITGA9        | 0.069126653  | 1.245337067  | 0.213910538 | 0.376908369 | no |
| ZNF239       | -0.069111711 | -1.245066598 | 0.214009803 | 0.377002156 | no |
| SNORA3       | 0.069111575  | 1.24506413   | 0.214010709 | 0.377002156 | no |
| EPHX1        | -0.06911072  | -1.245048645 | 0.214016393 | 0.377002156 | no |
| MGC12916     | 0.069092872  | 1.244725572  | 0.21413501  | 0.37718019  | no |
| FABP4        | 0.06907818   | 1.244459626  | 0.214232689 | 0.377321317 | no |
| KTI12        | 0.069068948  | 1.244292504  | 0.214294087 | 0.377398527 | no |
| PDZK1IP1-AS1 | -0.069033262 | -1.24364654  | 0.214531525 | 0.377785726 | no |
| ZNF114       | -0.069023487 | -1.243469593 | 0.214596599 | 0.377832613 | no |
| ARHGEF38     | -0.069021014 | -1.243424834 | 0.214613062 | 0.377832613 | no |
| ZNF90        | -0.069019778 | -1.243402452 | 0.214621294 | 0.377832613 | no |
| TMEM52B      | 0.069018699  | 1.243382933  | 0.214628474 | 0.377832613 | no |
| HOXB4        | 0.069003788  | 1.24311302   | 0.214727775 | 0.377946387 | no |
| PRSS48       | -0.069003713 | -1.243111659 | 0.214728276 | 0.377946387 | no |
| TTC4         | 0.068997504  | 1.242999268  | 0.214769635 | 0.377988225 | no |
| TRAIP        | -0.068991294 | -1.242886852 | 0.214811008 | 0.378030084 | no |
| SKIDA1       | -0.068979341 | -1.242670494 | 0.214890653 | 0.37813928  | no |
| ZSCAN25      | -0.068973573 | -1.242566089 | 0.214929094 | 0.378175958 | no |
| DNAJA4       | 0.068945936  | 1.242065825  | 0.215113354 | 0.378469185 | no |
| BCL2L14      | 0.068932288  | 1.241818787  | 0.215204387 | 0.378577286 | no |
| BIRC2        | 0.068931443  | 1.241803482  | 0.215210028 | 0.378577286 | no |
| OARD1        | -0.068896973 | -1.241179537 | 0.215440078 | 0.378949646 | no |
| CNPY2        | 0.068894443  | 1.241133745  | 0.215456969 | 0.378949646 | no |
| UQCR10       | 0.068878161  | 1.240839025  | 0.215565701 | 0.379109859 | no |
| EIF2B4       | -0.06886622  | -1.240622895 | 0.215645464 | 0.379219104 | no |
| DNAH7        | -0.068857112 | -1.240458024 | 0.215706324 | 0.379295092 | no |
| LOC100144603 | 0.068850245  | 1.240333727  | 0.215752215 | 0.379344748 | no |
| GLTPD1       | 0.068838445  | 1.240120141  | 0.215831089 | 0.379452383 | no |
| FANK1        | 0.068832866  | 1.240019154  | 0.215868388 | 0.379486915 | no |
| ZNF630       | -0.068829627 | -1.239960528 | 0.215890044 | 0.379493942 | no |
| FZR1         | -0.068812696 | -1.239654075 | 0.21600327  | 0.379661919 | no |
| DEFA8P       | 0.06879896   | 1.239405429  | 0.21609517  | 0.379792386 | no |
| SOX1         | -0.06878866  | -1.239219008 | 0.21616409  | 0.379882447 | no |
| MLH1         | -0.068778292 | -1.239031329 | 0.21623349  | 0.37997334  | no |
| TMEM79       | -0.068748384 | -1.23848999  | 0.21643376  | 0.380290523 | no |
| RAD54L2      | -0.068746052 | -1.238447778 | 0.216449382 | 0.380290523 | no |
| LOC256021    | -0.068741201 | -1.238359981 | 0.216481877 | 0.380307663 | no |
| USP35        | -0.068739313 | -1.238325797 | 0.21649453  | 0.380307663 | no |
| LINGO3       | 0.068724547  | 1.23805853   | 0.216593476 | 0.380411344 | no |
| NUF2         | -0.068717613 | -1.237933026 | 0.21663995  | 0.380411344 | no |
| LOC284648    | 0.068715981  | 1.237903483  | 0.216650891 | 0.380411344 | no |
| CTDSPL2      | -0.068715135 | -1.237888176 | 0.21665656  | 0.380411344 | no |
| TBC1D3C      | -0.06871343  | -1.237857318 | 0.216667988 | 0.380411344 | no |

|              |              |              |             |             |    |
|--------------|--------------|--------------|-------------|-------------|----|
| ADNP2        | -0.068712049 | -1.237832318 | 0.216677247 | 0.380411344 | no |
| RNF222       | -0.068711248 | -1.237817817 | 0.216682618 | 0.380411344 | no |
| PRR26        | -0.068709377 | -1.237783957 | 0.21669516  | 0.380411344 | no |
| TCP11        | -0.068706515 | -1.237732145 | 0.216714351 | 0.380413961 | no |
| COG3         | -0.068696859 | -1.237557376 | 0.216779097 | 0.380496535 | no |
| GRINA        | 0.068688838  | 1.237412187  | 0.216832895 | 0.380559881 | no |
| KCNA3        | -0.068648827 | -1.236687996 | 0.217101377 | 0.380918682 | no |
| LOC100128682 | -0.068647557 | -1.236664993 | 0.217109909 | 0.380918682 | no |
| GLT8D1       | 0.068646741  | 1.236650222  | 0.217115388 | 0.380918682 | no |
| POM121L8P    | 0.068644321  | 1.236606424  | 0.217131634 | 0.380918682 | no |
| MYSM1        | 0.068642486  | 1.236573217  | 0.217143952 | 0.380918682 | no |
| LOC100130581 | -0.068641772 | -1.236560288 | 0.217148748 | 0.380918682 | no |
| PTPRG        | -0.068639887 | -1.236526176 | 0.217161402 | 0.380918682 | no |
| UBE2B        | 0.068632562  | 1.236393596  | 0.21721059  | 0.380968307 | no |
| DCK          | 0.068630395  | 1.236354365  | 0.217225147 | 0.380968307 | no |
| TBX3         | -0.068611313 | -1.236008995 | 0.217353325 | 0.381153739 | no |
| PSMC1        | 0.068609375  | 1.235973907  | 0.21736635  | 0.381153739 | no |
| PEX10        | 0.0685987    | 1.235780695  | 0.217438084 | 0.381248419 | no |
| KDM8         | -0.068582439 | -1.235486381 | 0.217547388 | 0.38140895  | no |
| LOC100127888 | 0.068577761  | 1.235401702  | 0.217578844 | 0.381432982 | no |
| METTL21D     | -0.068565979 | -1.235188453 | 0.217658074 | 0.381539062 | no |
| DDX21        | -0.068563483 | -1.235143276 | 0.217674861 | 0.381539062 | no |
| C1orf151-NBL | -0.068551321 | -1.234923141 | 0.217756677 | 0.381651341 | no |
| MTERFD1      | 0.068522748  | 1.234405983  | 0.21794897  | 0.381957214 | no |
| AKR1C3       | -0.0685194   | -1.234345384 | 0.217971511 | 0.381965569 | no |
| MRPS16       | -0.068514396 | -1.234254816 | 0.218005201 | 0.381993459 | no |
| PAGE5        | 0.068508101  | 1.23414088   | 0.21804759  | 0.382036586 | no |
| CTNND1       | 0.068503943  | 1.234065622  | 0.218075593 | 0.382054501 | no |
| PCDHA9       | -0.068493021 | -1.233867943 | 0.218149159 | 0.382127222 | no |
| SLC9C1       | 0.068490337  | 1.233819359  | 0.218167242 | 0.382127222 | no |
| TSPAN12      | -0.068489499 | -1.233804197 | 0.218172885 | 0.382127222 | no |
| RRM2         | -0.068482665 | -1.2336805   | 0.218218931 | 0.382127222 | no |
| DOC2B        | -0.068481458 | -1.233658663 | 0.218227061 | 0.382127222 | no |
| CCKAR        | 0.06848002   | 1.233632636  | 0.218236751 | 0.382127222 | no |
| NDNF         | 0.068479305  | 1.233619699  | 0.218241567 | 0.382127222 | no |
| NR2E1        | 0.068445049  | 1.232999691  | 0.218472488 | 0.382500387 | no |
| SNORA38B     | -0.068441906 | -1.232942805 | 0.218493685 | 0.382506335 | no |
| C5orf28      | 0.068439186  | 1.232893564  | 0.218512033 | 0.382507298 | no |
| KLK8         | -0.068434631 | -1.232811125 | 0.218542754 | 0.382529918 | no |
| HNRNPUL2-BSC | -0.068428853 | -1.23270654  | 0.218581733 | 0.382566987 | no |
| DYRK1A       | -0.068421051 | -1.232565343 | 0.218634366 | 0.382627944 | no |
| LMX1B        | -0.068396289 | -1.232117166 | 0.218801488 | 0.382889242 | no |
| FAM214A      | -0.068376249 | -1.231754465 | 0.218936804 | 0.383048244 | no |
| JAM2         | 0.068375223  | 1.2317359    | 0.218943732 | 0.383048244 | no |
| OR10G7       | -0.068374914 | -1.231730303 | 0.21894582  | 0.383048244 | no |
| IPPK         | 0.06835849   | 1.23143304   | 0.219056772 | 0.383211158 | no |
| PTPN12       | 0.068336655  | 1.231037853  | 0.219204335 | 0.383438088 | no |
| TMEM30B      | 0.068325871  | 1.230842673  | 0.219277241 | 0.383534402 | no |
| CXCR5        | 0.068316852  | 1.230679448  | 0.219338225 | 0.383558493 | no |
| ARAP3        | 0.068316189  | 1.230667447  | 0.219342709 | 0.383558493 | no |
| GOLGA5       | 0.068315916  | 1.230662502  | 0.219344557 | 0.383558493 | no |

|              |              |              |             |             |    |
|--------------|--------------|--------------|-------------|-------------|----|
| GFM1         | -0.068300242 | -1.230378824 | 0.219450576 | 0.383712662 | no |
| ACOXL        | 0.068293919  | 1.230264383  | 0.219493356 | 0.383756241 | no |
| PNPLA1       | -0.068282552 | -1.23005866  | 0.219570274 | 0.383843974 | no |
| PROSER2-AS1  | -0.068280862 | -1.230028072 | 0.219581713 | 0.383843974 | no |
| CRYBB2       | -0.068278586 | -1.229986879 | 0.219597118 | 0.383843974 | no |
| MS4A10       | -0.0682742   | -1.229907496 | 0.219626806 | 0.383864646 | no |
| PPDPF        | 0.068264124  | 1.229725146  | 0.219695015 | 0.383952635 | no |
| ZNF295-AS1   | 0.068260087  | 1.229652079  | 0.21972235  | 0.383969184 | no |
| SIN3A        | -0.068247865 | -1.229430877 | 0.219805119 | 0.384070757 | no |
| ETV3         | 0.068244106  | 1.229362852  | 0.219830577 | 0.384070757 | no |
| ROCK2        | 0.068243588  | 1.22935347   | 0.219834088 | 0.384070757 | no |
| HIST4H4      | 0.068225148  | 1.229019743  | 0.219959016 | 0.38425778  | no |
| CATSPER3     | -0.06822116  | -1.228947551 | 0.219986047 | 0.384273766 | no |
| DDX41        | -0.068207616 | -1.228702437 | 0.220077844 | 0.384402873 | no |
| HIST1H2BG    | 0.068204556  | 1.228647055  | 0.220098589 | 0.384407864 | no |
| FLJ41649     | -0.068178125 | -1.228168697 | 0.220277829 | 0.384689649 | no |
| CIB4         | -0.068174569 | -1.228104335 | 0.220301954 | 0.384700519 | no |
| PNPO         | 0.068169258  | 1.228008212  | 0.220337986 | 0.384732179 | no |
| SLC01A2      | -0.068157871 | -1.227802133 | 0.220415251 | 0.384835825 | no |
| PPAN-P2RY11  | -0.06812173  | -1.227148047 | 0.220660617 | 0.385232927 | no |
| SUV39H1      | -0.068110571 | -1.226946094 | 0.220736416 | 0.385333954 | no |
| FABP7        | 0.068105055  | 1.226846274  | 0.220773887 | 0.385368065 | no |
| LOC100272228 | 0.068098823  | 1.226733481  | 0.220816235 | 0.38541068  | no |
| LOC284412    | -0.068092397 | -1.226617181 | 0.220859905 | 0.385455596 | no |
| TSPAN16      | -0.068086052 | -1.226502353 | 0.220903028 | 0.385499552 | no |
| CA9          | 0.068081778  | 1.226425006  | 0.220932079 | 0.385518944 | no |
| SLC36A3      | -0.068074735 | -1.22629754  | 0.220979961 | 0.385571189 | no |
| LHX9         | -0.068067449 | -1.226165671 | 0.221029504 | 0.385626325 | no |
| ODF3L2       | -0.068056704 | -1.225971223 | 0.221102572 | 0.385722493 | no |
| ERCC5        | -0.068052791 | -1.225900399 | 0.221129191 | 0.385737616 | no |
| CDK10        | 0.068031336  | 1.225512104  | 0.221275167 | 0.385960929 | no |
| GSR          | 0.068024712  | 1.225392235  | 0.221320245 | 0.386008227 | no |
| HEMGN        | 0.067969958  | 1.224401326  | 0.221693138 | 0.386627219 | no |
| SETD7        | 0.06796203   | 1.224257849  | 0.221747167 | 0.386659995 | no |
| MYO7B        | 0.067961921  | 1.224255863  | 0.221747915 | 0.386659995 | no |
| SLC6A18      | -0.067956681 | -1.224161046 | 0.221783626 | 0.38669089  | no |
| RHOT1        | -0.06794755  | -1.22399579  | 0.221845877 | 0.386768049 | no |
| S1PR1        | -0.067938905 | -1.223839333 | 0.221904824 | 0.386839437 | no |
| UBR2         | -0.067898015 | -1.223099344 | 0.222183779 | 0.387294313 | no |
| PRSS36       | 0.067884707  | 1.222858512  | 0.22227462  | 0.387396468 | no |
| MMP23B       | 0.067884149  | 1.222848399  | 0.222278435 | 0.387396468 | no |
| CCRL1        | 0.067878768  | 1.222751027  | 0.222315171 | 0.387429074 | no |
| DNAJA1P5     | 0.067875676  | 1.222695068  | 0.222336285 | 0.387434453 | no |
| ADK          | -0.067867688 | -1.222550507 | 0.222390837 | 0.387498093 | no |
| SLC5A3       | 0.067861148  | 1.222432151  | 0.222435507 | 0.387544506 | no |
| PAR4         | -0.067851069 | -1.222249764 | 0.222504356 | 0.387633035 | no |
| AQP8         | -0.067842056 | -1.222086644 | 0.222565946 | 0.387700928 | no |
| PRR5L        | -0.067840086 | -1.222050995 | 0.222579408 | 0.387700928 | no |
| LHX6         | -0.067832144 | -1.221907276 | 0.222633684 | 0.387764041 | no |
| AKR7L        | -0.067816688 | -1.221627571 | 0.222739344 | 0.387886563 | no |
| LOC100271832 | -0.067816574 | -1.221625499 | 0.222740127 | 0.387886563 | no |

|              |              |              |             |             |    |
|--------------|--------------|--------------|-------------|-------------|----|
| ZNF707       | -0.067803363 | -1.221386418 | 0.22283047  | 0.388012448 | no |
| ING1         | -0.067799464 | -1.221315864 | 0.222857135 | 0.388026782 | no |
| H2BFWT       | -0.06779688  | -1.221269095 | 0.222874813 | 0.388026782 | no |
| GPR62        | -0.067786371 | -1.221078914 | 0.222946707 | 0.388085374 | no |
| TMEM101      | 0.067785067  | 1.221055321  | 0.222955627 | 0.388085374 | no |
| LOC440173    | -0.067784042 | -1.221036769 | 0.222962641 | 0.388085374 | no |
| KRT19        | -0.067719788 | -1.219873999 | 0.223402586 | 0.388799118 | no |
| FANCA        | -0.067718869 | -1.219857369 | 0.223408883 | 0.388799118 | no |
| SNRNP27      | -0.067703723 | -1.219583272 | 0.223512683 | 0.388874106 | no |
| SRL          | -0.067701682 | -1.219546342 | 0.223526672 | 0.388874106 | no |
| EPC1         | -0.067701602 | -1.219544891 | 0.223527221 | 0.388874106 | no |
| LOC646471    | -0.067700018 | -1.21951623  | 0.223538078 | 0.388874106 | no |
| SLC41A1      | -0.067699381 | -1.219504698 | 0.223542446 | 0.388874106 | no |
| FBX033       | -0.067691338 | -1.219359138 | 0.223597588 | 0.388938549 | no |
| TCFL5        | -0.067686235 | -1.219266804 | 0.223632573 | 0.38896792  | no |
| 39873        | -0.06767686  | -1.219097152 | 0.223696862 | 0.389048252 | no |
| TLE1         | -0.067647402 | -1.218564057 | 0.223898963 | 0.389368232 | no |
| CHIC1        | -0.067640429 | -1.218437879 | 0.223946817 | 0.389419941 | no |
| MED29        | -0.067624242 | -1.218144958 | 0.22405794  | 0.389581649 | no |
| FAM184A      | -0.067612757 | -1.217937129 | 0.224136805 | 0.389659351 | no |
| LOC730441    | -0.067612454 | -1.217931633 | 0.224138891 | 0.389659351 | no |
| MPO          | 0.067602363  | 1.217749028  | 0.224208202 | 0.389720084 | no |
| VPS37B       | -0.067602087 | -1.217744044 | 0.224210094 | 0.389720084 | no |
| TMEM160      | -0.067596931 | -1.217650727 | 0.22424552  | 0.389750138 | no |
| PRRT4        | -0.067590445 | -1.217533369 | 0.224290078 | 0.389769109 | no |
| NOP56        | -0.067590063 | -1.217526445 | 0.224292707 | 0.389769109 | no |
| ZNF385D      | 0.067581766  | 1.217376299  | 0.224349725 | 0.389795525 | no |
| FASTK        | 0.067579896  | 1.217342468  | 0.224362573 | 0.389795525 | no |
| FHL5         | 0.067578312  | 1.217313805  | 0.22437346  | 0.389795525 | no |
| TENM3        | -0.067577294 | -1.217295377 | 0.224380459 | 0.389795525 | no |
| LOC646626    | -0.067570755 | -1.217177052 | 0.224425404 | 0.389842092 | no |
| ASNSD1       | -0.067556508 | -1.216919242 | 0.224523354 | 0.389980717 | no |
| FOXJ1        | 0.067542308  | 1.216662275  | 0.224621015 | 0.390118816 | no |
| GNG8         | 0.06753623   | 1.216552289  | 0.224662824 | 0.3901599   | no |
| UGT2B7       | -0.067522752 | -1.216308385 | 0.224755561 | 0.39027612  | no |
| MAS1         | -0.067521225 | -1.216280758 | 0.224766067 | 0.39027612  | no |
| CGB7         | 0.067503233  | 1.215955176  | 0.224889906 | 0.390459603 | no |
| TH1L         | -0.067500134 | -1.215899111 | 0.224911236 | 0.390465091 | no |
| ZNF674-AS1   | -0.067494632 | -1.215799531 | 0.224949124 | 0.390499324 | no |
| ITPRIPL1     | 0.067485057  | 1.215626278  | 0.225015055 | 0.390582227 | no |
| SCARNA10     | -0.06747585  | -1.215459662 | 0.225078474 | 0.390644238 | no |
| LOC100652739 | -0.067474593 | -1.215436912 | 0.225087134 | 0.390644238 | no |
| SCN5A        | -0.067465267 | -1.215268157 | 0.225151382 | 0.390724189 | no |
| EBF3         | -0.067457947 | -1.215135709 | 0.225201816 | 0.390780156 | no |
| ASB17        | -0.067444232 | -1.214887524 | 0.225296343 | 0.390912619 | no |
| INCA1        | -0.067432016 | -1.214666474 | 0.225380559 | 0.391000185 | no |
| NKAIN2       | -0.067431634 | -1.214659549 | 0.225383197 | 0.391000185 | no |
| PKD2L1       | -0.067413853 | -1.214337798 | 0.22550582  | 0.391181337 | no |
| FAM60A       | -0.067381305 | -1.213748825 | 0.225730407 | 0.39153932  | no |
| C12orf4      | 0.067375182  | 1.213638034  | 0.225772672 | 0.391581026 | no |
| TMEM88B      | -0.067361518 | -1.213390776 | 0.225867017 | 0.39171231  | no |

|             |              |              |             |             |    |
|-------------|--------------|--------------|-------------|-------------|----|
| C10orf116   | -0.067356318 | -1.213296676 | 0.225902929 | 0.39171231  | no |
| DLEU2L      | -0.067356301 | -1.213296369 | 0.225903047 | 0.39171231  | no |
| IFNA6       | -0.067340243 | -1.213005813 | 0.226013961 | 0.391873017 | no |
| KIAA0232    | -0.067334896 | -1.212909043 | 0.22605091  | 0.391905463 | no |
| THRB-AS1    | -0.067324677 | -1.212724141 | 0.226121522 | 0.391996259 | no |
| C16orf89    | 0.067319709  | 1.212634244  | 0.226155858 | 0.392008404 | no |
| ATP4A       | -0.067318385 | -1.212610288 | 0.226165009 | 0.392008404 | no |
| RGAG1       | -0.067309586 | -1.212451072 | 0.226225833 | 0.392082207 | no |
| LINC00485   | -0.067294129 | -1.212171364 | 0.226332715 | 0.392235817 | no |
| TULP3       | 0.067290756  | 1.212110336  | 0.22635604  | 0.39224461  | no |
| PCBD2       | -0.067286129 | -1.21202661  | 0.226388043 | 0.392251166 | no |
| LOC399715   | 0.067283359  | 1.211976482  | 0.226407205 | 0.392251166 | no |
| SEC13       | 0.067282293  | 1.211957192  | 0.226414579 | 0.392251166 | no |
| DLX2        | -0.067263542 | -1.211617902 | 0.226544311 | 0.392444284 | no |
| KRTAP10-4   | -0.067238633 | -1.211167181 | 0.226716733 | 0.392689022 | no |
| SAYSD1      | -0.067236104 | -1.211121409 | 0.226734248 | 0.392689022 | no |
| FAM74A2     | -0.067235214 | -1.211105315 | 0.226740406 | 0.392689022 | no |
| SCARF1      | 0.067230917  | 1.211027562  | 0.226770162 | 0.392708909 | no |
| CHAF1A      | -0.067214137 | -1.210723927 | 0.226886389 | 0.392853273 | no |
| TSPAN14     | 0.067213603  | 1.210714274  | 0.226890085 | 0.392853273 | no |
| CAPN1       | -0.067206139 | -1.210579215 | 0.226941798 | 0.392911156 | no |
| LOC339593   | -0.067198138 | -1.210434435 | 0.226997242 | 0.39296727  | no |
| SPCS2       | -0.067196185 | -1.21039909  | 0.227010779 | 0.39296727  | no |
| GFI1B       | -0.067181673 | -1.210136509 | 0.227111366 | 0.393109726 | no |
| RIOK1       | -0.067178396 | -1.210077217 | 0.227134083 | 0.393117385 | no |
| FPGT-TNNI3K | -0.067172359 | -1.20996798  | 0.22717594  | 0.393146607 | no |
| ADAMTS9     | 0.067170685  | 1.209937675  | 0.227187554 | 0.393146607 | no |
| LOC643802   | 0.067144151  | 1.209457568  | 0.227371593 | 0.393433406 | no |
| QRFPR       | -0.067129123 | -1.209185631 | 0.227475882 | 0.393563676 | no |
| PER1        | -0.067128024 | -1.209165761 | 0.227483504 | 0.393563676 | no |
| LRRC17      | 0.067122414  | 1.209064244  | 0.227522446 | 0.393599363 | no |
| ASAH2       | 0.067118942  | 1.209001424  | 0.227546546 | 0.393603291 | no |
| SPPL2C      | -0.06711681  | -1.208962848 | 0.227561346 | 0.393603291 | no |
| HILPDA      | 0.067080018  | 1.208297121  | 0.227816869 | 0.394013547 | no |
| GPR78       | -0.067075655 | -1.208218173 | 0.227847185 | 0.394034268 | no |
| SENP5       | -0.067064307 | -1.20801284  | 0.227926046 | 0.394138933 | no |
| METTL2B     | -0.067036612 | -1.207511718 | 0.22811859  | 0.39444015  | no |
| FOXA2       | 0.06703008   | 1.207393537  | 0.228164016 | 0.394486956 | no |
| ADAM15      | 0.06702631   | 1.207325315  | 0.228190241 | 0.394500561 | no |
| PDE4D       | -0.067011675 | -1.207060512 | 0.228292056 | 0.394644834 | no |
| MBTPS1      | 0.067005033  | 1.206940332  | 0.228338274 | 0.394692983 | no |
| SEPSECS     | 0.06699332   | 1.206728402  | 0.228419795 | 0.394777606 | no |
| ATXN2L      | -0.066990192 | -1.206671811 | 0.228441567 | 0.394777606 | no |
| LTN1        | -0.066990081 | -1.206669803 | 0.228442339 | 0.394777606 | no |
| IL17RC      | 0.066922692  | 1.205450474  | 0.228911801 | 0.395557088 | no |
| FM09P       | 0.066901686  | 1.205070399  | 0.229058277 | 0.395778375 | no |
| NR2C1       | -0.066890573 | -1.204869327 | 0.229135794 | 0.395838294 | no |
| ACTN3       | -0.066890287 | -1.204864151 | 0.22913779  | 0.395838294 | no |
| ERCC2       | -0.066888793 | -1.204837122 | 0.229148212 | 0.395838294 | no |
| SHISA2      | -0.066884079 | -1.204751836 | 0.229181098 | 0.395863284 | no |
| RPF2        | 0.066873713  | 1.204564274  | 0.229253435 | 0.395956406 | no |

|              |              |              |             |             |    |
|--------------|--------------|--------------|-------------|-------------|----|
| STX10        | -0.066861604 | -1.204345185 | 0.229337951 | 0.396070548 | no |
| ASB18        | -0.066858416 | -1.204287496 | 0.229360209 | 0.396077159 | no |
| OVGP1        | -0.06684358  | -1.204019069 | 0.229463795 | 0.396224202 | no |
| TTL4         | -0.066837556 | -1.203910074 | 0.229505866 | 0.396265008 | no |
| PTPN3        | -0.066833537 | -1.203837355 | 0.229533937 | 0.39628164  | no |
| TMEM185B     | 0.066805743  | 1.203334482  | 0.229728129 | 0.396578602 | no |
| PRAC         | -0.066803637 | -1.203296372 | 0.22974285  | 0.396578602 | no |
| NME9         | -0.066799169 | -1.203215521 | 0.229774084 | 0.396600662 | no |
| SLC13A5      | 0.066795282  | 1.203145202  | 0.229801252 | 0.396615701 | no |
| ATP5H        | 0.066788831  | 1.203028477  | 0.229846354 | 0.396661688 | no |
| POGZ         | 0.066773279  | 1.202747097  | 0.229955104 | 0.3968175   | no |
| KCNIP4       | -0.066745096 | -1.202237174 | 0.230152277 | 0.397125861 | no |
| DDA1         | -0.066731535 | -1.201991819 | 0.230247192 | 0.39725774  | no |
| ABL1         | -0.066725261 | -1.201878315 | 0.23029111  | 0.397301618 | no |
| ANKRD11      | 0.066713348  | 1.201662759  | 0.230374532 | 0.397391288 | no |
| HNRNPU       | -0.06671059  | -1.201612872 | 0.230393842 | 0.397391288 | no |
| LCN12        | -0.066709917 | -1.201600684 | 0.23039856  | 0.397391288 | no |
| RAB21        | 0.066704885  | 1.201509641  | 0.230433803 | 0.397418167 | no |
| TMEM141      | -0.066702411 | -1.201464889 | 0.230451128 | 0.397418167 | no |
| TTC30A       | 0.066691805  | 1.201272999  | 0.230525427 | 0.397485912 | no |
| LOC100652999 | -0.066691523 | -1.201267896 | 0.230527403 | 0.397485912 | no |
| ADAM20       | -0.066687012 | -1.201186282 | 0.230559009 | 0.397508516 | no |
| LOC643355    | -0.066669447 | -1.200868476 | 0.230682111 | 0.397688854 | no |
| MRS2P2       | -0.066652926 | -1.200569566 | 0.230797938 | 0.39785662  | no |
| MRPL50       | -0.066638028 | -1.200300029 | 0.230902418 | 0.398004801 | no |
| CPNE4        | -0.066623954 | -1.200045387 | 0.231001155 | 0.398129378 | no |
| GLYR1        | -0.066622445 | -1.200018089 | 0.231011742 | 0.398129378 | no |
| MT1H         | 0.066614735  | 1.199878596  | 0.231065844 | 0.398190687 | no |
| SSX2IP       | 0.066611087  | 1.199812589  | 0.231091449 | 0.39820288  | no |
| MAP7D1       | 0.066599003  | 1.199593968  | 0.231176266 | 0.398317096 | no |
| SLC9A3R1     | 0.066581478  | 1.199276894  | 0.23129932  | 0.398440937 | no |
| LINC00221    | 0.066581368  | 1.199274911  | 0.23130009  | 0.398440937 | no |
| RHBG         | -0.066580846 | -1.199265454 | 0.231303761 | 0.398440937 | no |
| TBCCD1       | -0.066575674 | -1.199171894 | 0.23134008  | 0.398471561 | no |
| RNU11        | -0.066555163 | -1.198800799 | 0.231484177 | 0.398658391 | no |
| KRTAP5-5     | -0.066554954 | -1.198797011 | 0.231485648 | 0.398658391 | no |
| CCDC13-AS1   | -0.066550745 | -1.198720872 | 0.231515221 | 0.398677373 | no |
| TRIM52       | -0.066546667 | -1.198647078 | 0.231543885 | 0.398694787 | no |
| PLEKHM1P     | 0.066543762  | 1.198594521  | 0.231564302 | 0.398697998 | no |
| GTPBP2       | 0.066531577  | 1.198374071  | 0.231649954 | 0.39881352  | no |
| C18orf61     | -0.066525815 | -1.198269832 | 0.231690463 | 0.398845246 | no |
| RRM1         | 0.066523677  | 1.19823114   | 0.2317055   | 0.398845246 | no |
| CRCP         | -0.06651183  | -1.198016814 | 0.231788809 | 0.398956696 | no |
| CHRND        | 0.066505609  | 1.197904247  | 0.231832573 | 0.398970484 | no |
| PKIG         | -0.066505413 | -1.197900707 | 0.231833949 | 0.398970484 | no |
| RALGAPA2     | 0.066492189  | 1.197661457  | 0.231926984 | 0.399098632 | no |
| BPIFB2       | -0.066482093 | -1.1974788   | 0.23199803  | 0.399188925 | no |
| SEL1L        | 0.066468527  | 1.197233373  | 0.232093516 | 0.399321251 | no |
| C6orf106     | 0.066445794  | 1.19682208   | 0.232253596 | 0.399536776 | no |
| NCAPH        | -0.066444976 | -1.196807292 | 0.232259353 | 0.399536776 | no |
| CYP2G1P      | -0.066442818 | -1.196768242 | 0.232274556 | 0.399536776 | no |

|              |              |              |             |             |    |
|--------------|--------------|--------------|-------------|-------------|----|
| SETD6        | -0.066416048 | -1.196283927 | 0.23246317  | 0.399829211 | no |
| ZEB2-AS1     | -0.066408653 | -1.196150131 | 0.232515296 | 0.399882023 | no |
| CHRNA3       | -0.066406412 | -1.196109596 | 0.232531089 | 0.399882023 | no |
| NMB          | -0.06640048  | -1.196002272 | 0.23257291  | 0.39992194  | no |
| MMEL1        | 0.066393874  | 1.195882754  | 0.232619488 | 0.39997003  | no |
| CYP4Z2P      | -0.0663775   | -1.195586532 | 0.232734959 | 0.400136561 | no |
| LOC100132352 | -0.066349522 | -1.195080364 | 0.232932365 | 0.40044392  | no |
| TK1          | 0.066346191  | 1.195020097  | 0.232955877 | 0.400452308 | no |
| GLP2R        | -0.066329748 | -1.194722622 | 0.233071956 | 0.400603195 | no |
| RHPN1        | -0.066328254 | -1.194695581 | 0.23308251  | 0.400603195 | no |
| C12orf61     | 0.06632358   | 1.19461103   | 0.233115512 | 0.400603195 | no |
| TMEM208      | 0.066323197  | 1.194604104  | 0.233118215 | 0.400603195 | no |
| OR5M10       | -0.066316486 | -1.194482683 | 0.233165614 | 0.400642328 | no |
| LOC728739    | -0.066314194 | -1.194441226 | 0.233181799 | 0.400642328 | no |
| LOC284889    | -0.066310634 | -1.194376822 | 0.233206945 | 0.400642328 | no |
| LOC100507066 | -0.066309415 | -1.194354766 | 0.233215556 | 0.400642328 | no |
| DRD4         | -0.066305314 | -1.194280567 | 0.233244529 | 0.400660073 | no |
| A1BG-AS1     | 0.066300296  | 1.194189792  | 0.233279978 | 0.400673194 | no |
| RAB23        | 0.066298955  | 1.194165525  | 0.233289455 | 0.400673194 | no |
| TSEN54       | -0.066282684 | -1.19387117  | 0.233404434 | 0.400838636 | no |
| ZAR1L        | -0.066269628 | -1.193634966 | 0.233496727 | 0.400965095 | no |
| BTBD7        | -0.066242504 | -1.193144267 | 0.233688544 | 0.401262424 | no |
| ANAPC7       | -0.066228516 | -1.192891205 | 0.233787511 | 0.401400288 | no |
| STPG1        | 0.066207961  | 1.192519336  | 0.233932996 | 0.401596864 | no |
| RAB4B        | 0.06620706   | 1.19250303   | 0.233939376 | 0.401596864 | no |
| MIR5006      | -0.066175785 | -1.191937248 | 0.234160852 | 0.401944958 | no |
| PDF          | 0.06616187   | 1.1916855    | 0.234259447 | 0.402082084 | no |
| ARL17B       | -0.066155102 | -1.191563074 | 0.234307405 | 0.402132282 | no |
| CPS1-IT1     | -0.066143047 | -1.19134499  | 0.234392852 | 0.402223511 | no |
| DYDC1        | -0.066142322 | -1.191331871 | 0.234397992 | 0.402223511 | no |
| DYRK2        | 0.066130871  | 1.191124706  | 0.234479183 | 0.402330709 | no |
| LOC100422737 | -0.066113069 | -1.190802664 | 0.234605435 | 0.402508889 | no |
| LOC284837    | 0.066110948  | 1.190764282  | 0.234620486 | 0.402508889 | no |
| BHLHE22      | -0.066106101 | -1.190676612 | 0.234654865 | 0.402520843 | no |
| PSG1         | 0.066100486  | 1.190575021  | 0.234694709 | 0.402520843 | no |
| DHX16        | 0.066099736  | 1.190561455  | 0.23470003  | 0.402520843 | no |
| FAM160A2     | 0.066099406  | 1.190555483  | 0.234702372 | 0.402520843 | no |
| OR2C1        | -0.066093624 | -1.190450887 | 0.2347434   | 0.40254935  | no |
| SPDL1        | -0.066090997 | -1.190403356 | 0.234762046 | 0.40254935  | no |
| ROPN1L       | 0.066089145  | 1.190369858  | 0.234775187 | 0.40254935  | no |
| CSF3         | 0.066075537  | 1.190123685  | 0.234871778 | 0.402682839 | no |
| CDYL         | -0.066061435 | -1.189868574 | 0.234971906 | 0.40282237  | no |
| PFN1P2       | -0.066046093 | -1.189591031 | 0.235080873 | 0.402977031 | no |
| TMEM237      | -0.06604282  | -1.189531825 | 0.235104122 | 0.402980578 | no |
| ANP32B       | -0.066039754 | -1.189476353 | 0.235125907 | 0.402980578 | no |
| FRG2B        | 0.066035821  | 1.189405195  | 0.235153854 | 0.402980578 | no |
| CDKN3        | 0.066032123  | 1.189338306  | 0.235180127 | 0.402980578 | no |
| MAP2K1       | -0.066029769 | -1.189295712 | 0.235196858 | 0.402980578 | no |
| SDHAF2       | 0.066028591  | 1.189274418  | 0.235205223 | 0.402980578 | no |
| ABCG8        | -0.066027328 | -1.189251565 | 0.2352142   | 0.402980578 | no |
| ACOT2        | -0.066024432 | -1.189199169 | 0.235234784 | 0.402983717 | no |

|              |              |              |             |             |    |
|--------------|--------------|--------------|-------------|-------------|----|
| KIF17        | -0.066021354 | -1.18914349  | 0.235256658 | 0.402989068 | no |
| VIMP         | 0.066009408  | 1.188927388  | 0.235341573 | 0.403102394 | no |
| OR10Q1       | -0.065993196 | -1.188634107 | 0.235456848 | 0.403253112 | no |
| C20orf202    | -0.065991756 | -1.188608046 | 0.235467093 | 0.403253112 | no |
| TBC1D3       | -0.065982904 | -1.188447922 | 0.23553005  | 0.403305115 | no |
| POU2F3       | 0.065980473  | 1.188403943  | 0.235547343 | 0.403305115 | no |
| LOC392196    | -0.065979571 | -1.188387631 | 0.235553758 | 0.403305115 | no |
| ZNF662       | -0.065968174 | -1.188181441 | 0.235634849 | 0.403411817 | no |
| GPBP1        | -0.065878065 | -1.186551387 | 0.236276626 | 0.404478331 | no |
| LOC202181    | 0.065865321  | 1.186320842  | 0.236367495 | 0.404601659 | no |
| POLH         | 0.065862434  | 1.18626862   | 0.236388081 | 0.404604671 | no |
| FBXW8        | -0.065857154 | -1.186173094 | 0.236425743 | 0.404636907 | no |
| CYCS         | -0.065852323 | -1.186085718 | 0.236460194 | 0.404651975 | no |
| NCOR2        | -0.06585064  | -1.186055258 | 0.236472205 | 0.404651975 | no |
| LOC644189    | -0.065845412 | -1.185960695 | 0.236509496 | 0.404683565 | no |
| MIXL1        | 0.065833814  | 1.185750888  | 0.236592248 | 0.404771824 | no |
| LONRF1       | -0.065832903 | -1.185734416 | 0.236598746 | 0.404771824 | no |
| CNKSR3       | -0.06581526  | -1.18541525  | 0.236724674 | 0.404955023 | no |
| PDZRN3       | -0.065792817 | -1.18500927  | 0.236884922 | 0.405180378 | no |
| PRSS12       | -0.06579153  | -1.184985983 | 0.236894116 | 0.405180378 | no |
| SMIM16       | -0.065783928 | -1.184848472 | 0.236948414 | 0.405240997 | no |
| KIAA1656     | -0.065775894 | -1.184703144 | 0.237005807 | 0.405306899 | no |
| GPR146       | 0.065765562  | 1.184516246  | 0.237079633 | 0.40540089  | no |
| PHF5A        | -0.065737876 | -1.184015417 | 0.237277542 | 0.405707029 | no |
| SNORA12      | -0.065723091 | -1.183747966 | 0.237383276 | 0.405855529 | no |
| GBF1         | -0.065708718 | -1.183487962 | 0.237486099 | 0.405999027 | no |
| ZIC5         | 0.065705861  | 1.183436296  | 0.237506535 | 0.406001666 | no |
| IFT20        | 0.065670559  | 1.182797711  | 0.237759224 | 0.406350569 | no |
| TUBD1        | 0.06566974   | 1.182782892  | 0.23776509  | 0.406350569 | no |
| GAB2         | -0.065669423 | -1.182777149 | 0.237767363 | 0.406350569 | no |
| LOC642366    | -0.065663005 | -1.182661052 | 0.237813324 | 0.406390631 | no |
| LARS2-AS1    | -0.065660868 | -1.182622407 | 0.237828625 | 0.406390631 | no |
| TM4SF5       | -0.065649739 | -1.1824211   | 0.237908338 | 0.406494521 | no |
| CDH15        | -0.065638388 | -1.182215759 | 0.237989668 | 0.406601157 | no |
| ZNF384       | -0.065628835 | -1.182042952 | 0.238058128 | 0.406685789 | no |
| HOMER2       | 0.06562573   | 1.181986785  | 0.238080382 | 0.406691478 | no |
| LAMA1        | -0.065619523 | -1.181874518 | 0.238124868 | 0.406735141 | no |
| ZAR1         | 0.065614736  | 1.181787928  | 0.238159184 | 0.406761426 | no |
| ZNF713       | -0.065601874 | -1.18155527  | 0.238251404 | 0.406886596 | no |
| CLDN11       | 0.065593859  | 1.181410275  | 0.23830889  | 0.406952431 | no |
| EXOSC2       | -0.065584033 | -1.181232551 | 0.238379364 | 0.407040436 | no |
| C4orf22      | 0.065578714  | 1.181136323  | 0.238417529 | 0.407073259 | no |
| PRR23C       | -0.065569885 | -1.180976623 | 0.238480876 | 0.407149071 | no |
| CD99         | 0.065562907  | 1.180850392  | 0.238530956 | 0.407168566 | no |
| LOC100289187 | -0.065561486 | -1.180824689 | 0.238541154 | 0.407168566 | no |
| LINC00483    | -0.065560374 | -1.18080458  | 0.238549133 | 0.407168566 | no |
| LYSMD2       | -0.065550021 | -1.180617302 | 0.238623449 | 0.407263068 | no |
| ZNF271       | 0.065537175  | 1.180384947  | 0.238715676 | 0.407388121 | no |
| SEC61B       | 0.065494661  | 1.179615921  | 0.239021102 | 0.407876965 | no |
| CBFA2T3      | -0.06547582  | -1.179275125 | 0.23915654  | 0.408075681 | no |
| CRISPLD1     | 0.065449805  | 1.178804548  | 0.239343645 | 0.40833631  | no |



|              |              |              |             |             |    |
|--------------|--------------|--------------|-------------|-------------|----|
| MYLK4        | 0.065449299  | 1.178795397  | 0.239347285 | 0.40833631  | no |
| FAM27L       | -0.065440244 | -1.178631614 | 0.239412432 | 0.408415031 | no |
| AFAP1L2      | -0.065427187 | -1.178395437 | 0.239506396 | 0.408542896 | no |
| C4BPB        | 0.06541757   | 1.178221486  | 0.23957562  | 0.408628543 | no |
| LINC00552    | -0.06541069  | -1.178097034 | 0.239625154 | 0.408680595 | no |
| ECT2         | -0.065402652 | -1.177951649 | 0.239683029 | 0.408746864 | no |
| C17orf82     | 0.06539406   | 1.177796226  | 0.239744911 | 0.408805685 | no |
| LCLAT1       | -0.065392581 | -1.177769471 | 0.239755565 | 0.408805685 | no |
| RHOXF1       | -0.065378883 | -1.177521709 | 0.239854239 | 0.408941488 | no |
| RIMBP3C      | 0.065363666  | 1.17724645   | 0.239963898 | 0.409095996 | no |
| ORM1         | 0.06535298   | 1.177053175  | 0.240040917 | 0.40919484  | no |
| PRIMA1       | 0.065345575  | 1.176919221  | 0.240094306 | 0.409236519 | no |
| FAM26D       | -0.065341296 | -1.176841834 | 0.240125155 | 0.409236519 | no |
| ZNF440       | -0.065335429 | -1.176735711 | 0.240167462 | 0.409236519 | no |
| AGPHD1       | 0.065334755  | 1.176723517  | 0.240172323 | 0.409236519 | no |
| EEF1B2       | -0.065334596 | -1.176720636 | 0.240173472 | 0.409236519 | no |
| ALDH1L1-AS1  | -0.065331481 | -1.176664293 | 0.240195936 | 0.409236519 | no |
| RBBP5        | -0.065330333 | -1.176643529 | 0.240204216 | 0.409236519 | no |
| ATP2C2       | -0.065328462 | -1.1766097   | 0.240217705 | 0.409236519 | no |
| ZNF767       | -0.065303548 | -1.176159055 | 0.240397445 | 0.409510264 | no |
| E2F2         | -0.065281554 | -1.175761235 | 0.240556195 | 0.409730804 | no |
| SLC9C2       | 0.065280329  | 1.175739075  | 0.240565041 | 0.409730804 | no |
| ST7-OT4      | -0.065268215 | -1.175519957 | 0.240652514 | 0.409835858 | no |
| DYNC1LI2     | -0.065266505 | -1.175489033 | 0.240664861 | 0.409835858 | no |
| ZNF350       | 0.065251895  | 1.175224771  | 0.24077039  | 0.409983079 | no |
| MIR1272      | 0.065246821  | 1.175132986  | 0.24080705  | 0.410013018 | no |
| LCE4A        | -0.065240244 | -1.175014026 | 0.24085457  | 0.410061441 | no |
| TTC34        | 0.065235243  | 1.174923577  | 0.240890706 | 0.410090476 | no |
| EGFLAM       | 0.065227469  | 1.174782959  | 0.240946893 | 0.410153637 | no |
| NRL          | -0.065217272 | -1.174598525 | 0.241020601 | 0.410246613 | no |
| COX10-AS1    | -0.065209425 | -1.174456585 | 0.241077338 | 0.410310689 | no |
| TPST2        | 0.065187153  | 1.174053755  | 0.241238409 | 0.410550127 | no |
| CHKB         | 0.065177892  | 1.173886245  | 0.241305411 | 0.410550127 | no |
| MMD          | 0.065177552  | 1.173880093  | 0.241307872 | 0.410550127 | no |
| MC2R         | -0.065177487 | -1.17387891  | 0.241308345 | 0.410550127 | no |
| KAZALD1      | 0.065176769  | 1.173865933  | 0.241313536 | 0.410550127 | no |
| SLC16A2      | -0.065173332 | -1.17380376  | 0.241338408 | 0.410559941 | no |
| LZTS1-AS1    | 0.065146027  | 1.173309898  | 0.241536041 | 0.410833783 | no |
| LOC100506710 | -0.06514581  | -1.173305969 | 0.241537614 | 0.410833783 | no |
| PTPRG-AS1    | 0.065134348  | 1.173098646  | 0.241620614 | 0.410915552 | no |
| SLC22A8      | -0.06513389  | -1.17309037  | 0.241623928 | 0.410915552 | no |
| BCL9         | -0.065129215 | -1.173005804 | 0.241657789 | 0.410940619 | no |
| MAATS1       | 0.06509462   | 1.172380091  | 0.241908439 | 0.411334304 | no |
| MYO16-AS1    | -0.065084676 | -1.172200235 | 0.241980521 | 0.411400358 | no |
| SLC22A31     | 0.06508398   | 1.172187632  | 0.241985572 | 0.411400358 | no |
| CDH24        | -0.065076551 | -1.172053274 | 0.24203943  | 0.411449728 | no |
| RYK          | 0.065072922  | 1.171987627  | 0.242065747 | 0.411449728 | no |
| CCDC114      | 0.065072053  | 1.171971914  | 0.242072047 | 0.411449728 | no |
| EIF4E3       | 0.065062326  | 1.171795989  | 0.242142586 | 0.411537076 | no |
| C18orf25     | 0.065011618  | 1.170878832  | 0.242510568 | 0.412129891 | no |
| PPM1D        | -0.064991922 | -1.170522603 | 0.2426536   | 0.412340358 | no |

|              |              |              |             |             |    |
|--------------|--------------|--------------|-------------|-------------|----|
| ARSH         | -0.064988708 | -1.170464462 | 0.24267695  | 0.412347433 | no |
| HGFAC        | -0.064981883 | -1.170341034 | 0.242726526 | 0.412399065 | no |
| SREBF1       | 0.064977434  | 1.17026056   | 0.242758853 | 0.412421383 | no |
| ZSCAN12P1    | 0.06494917   | 1.169749355  | 0.242964278 | 0.412726715 | no |
| GSG1L        | -0.064947422 | -1.169717742 | 0.242976986 | 0.412726715 | no |
| C1orf192     | 0.064925337  | 1.169318299  | 0.243137591 | 0.412947131 | no |
| OSGIN2       | -0.064924294 | -1.169299436 | 0.243145177 | 0.412947131 | no |
| ETV5         | 0.064866626  | 1.168256433  | 0.243564904 | 0.413627289 | no |
| HRASLS       | -0.064858474 | -1.168109002 | 0.243624274 | 0.413695423 | no |
| FFAR2        | 0.06483988   | 1.167772707  | 0.243759738 | 0.413828763 | no |
| SCRN1        | -0.064839839 | -1.167771971 | 0.243760035 | 0.413828763 | no |
| EXOSC1       | 0.064839767  | 1.167770655  | 0.243760565 | 0.413828763 | no |
| RPLP2        | -0.064828782 | -1.167571992 | 0.243840615 | 0.413931963 | no |
| HAUS1        | 0.064822722  | 1.167462384  | 0.243884788 | 0.41397425  | no |
| LOC100128675 | -0.06481533  | -1.167328692 | 0.243938675 | 0.414033018 | no |
| IDS          | 0.064809724  | 1.167227305  | 0.243979547 | 0.414069687 | no |
| DHFR         | -0.06479482  | -1.166957743 | 0.244088238 | 0.414221441 | no |
| SGK223       | 0.064786817  | 1.166813007  | 0.244146612 | 0.414260967 | no |
| PLXNA1       | 0.064785007  | 1.166780266  | 0.244159818 | 0.414260967 | no |
| H2AFX        | -0.064783699 | -1.166756615 | 0.244169358 | 0.414260967 | no |
| PPP1R3F      | -0.064772191 | -1.166548484 | 0.244253322 | 0.414370709 | no |
| IFT27        | -0.064759259 | -1.166314601 | 0.2443477   | 0.414494767 | no |
| CDC23        | -0.064756886 | -1.166271678 | 0.244365023 | 0.414494767 | no |
| FLJ38109     | 0.064738657  | 1.165942     | 0.244498106 | 0.414661421 | no |
| RNF34        | -0.064738143 | -1.165932696 | 0.244501863 | 0.414661421 | no |
| C1orf109     | 0.064708968  | 1.16540504   | 0.244714973 | 0.414990097 | no |
| THYN1        | -0.064698252 | -1.165211242 | 0.244793278 | 0.415090132 | no |
| TUBB1        | -0.064680037 | -1.164881807 | 0.244926427 | 0.415283144 | no |
| LOC494141    | -0.064670365 | -1.164706889 | 0.244997146 | 0.41537028  | no |
| FNDC9        | -0.064653956 | -1.164410125 | 0.245117159 | 0.415540969 | no |
| KCNQ10T1     | -0.064646169 | -1.164269282 | 0.245174131 | 0.415604768 | no |
| SPAM1        | -0.064609216 | -1.163600973 | 0.245444594 | 0.416030426 | no |
| LECT2        | -0.06460031  | -1.163439913 | 0.245509806 | 0.416108143 | no |
| MIR5188      | -0.064590054 | -1.163254434 | 0.245584921 | 0.416189199 | no |
| CDKN2B-AS1   | 0.064588492  | 1.163226184  | 0.245596362 | 0.416189199 | no |
| CAV3         | -0.064560498 | -1.162719904 | 0.245801482 | 0.416462369 | no |
| JAG1         | 0.064560133  | 1.162713297  | 0.24580416  | 0.416462369 | no |
| POM121L1P    | -0.064558559 | -1.162684829 | 0.245815697 | 0.416462369 | no |
| RSPH9        | 0.064541099  | 1.162369077  | 0.245943691 | 0.416646371 | no |
| TEKT4P2      | 0.064528672  | 1.162144325  | 0.246034825 | 0.416767569 | no |
| HYMAI        | -0.064526055 | -1.162096998 | 0.246054019 | 0.416767569 | no |
| ZNF341       | -0.06451499  | -1.161896885 | 0.246135186 | 0.416872196 | no |
| WIF1         | -0.064508961 | -1.161787849 | 0.246179421 | 0.416914258 | no |
| MRPL20       | 0.064494231  | 1.161521454  | 0.246287516 | 0.417042504 | no |
| SCARNA5      | -0.064488448 | -1.161416878 | 0.246329959 | 0.417042504 | no |
| IMPA1        | 0.064488302  | 1.161414234  | 0.246331032 | 0.417042504 | no |
| SSUH2        | -0.064488065 | -1.161409955 | 0.246332769 | 0.417042504 | no |
| KCND3        | -0.064472531 | -1.161129016 | 0.246446817 | 0.417202721 | no |
| MSH5-SAPCD1  | -0.06445881  | -1.160880878 | 0.246547581 | 0.417340426 | no |
| TMEM39B      | 0.064454966  | 1.160811366  | 0.246575813 | 0.417347739 | no |
| CACNA1S      | -0.064452934 | -1.160774616 | 0.24659074  | 0.417347739 | no |

|              |              |              |             |             |    |
|--------------|--------------|--------------|-------------|-------------|----|
| GABRA2       | -0.064449231 | -1.160707636 | 0.246617947 | 0.417353564 | no |
| GPR116       | 0.064447179  | 1.160670527  | 0.246633022 | 0.417353564 | no |
| LOC100288524 | 0.064424074  | 1.160252679  | 0.246802807 | 0.417607994 | no |
| GPD1         | 0.064418647  | 1.160154542  | 0.246842696 | 0.417642606 | no |
| LYPD4        | -0.064404818 | -1.159904452 | 0.246944366 | 0.417781735 | no |
| ZNF140       | -0.064397031 | -1.15976362  | 0.247001633 | 0.417845725 | no |
| ETAA1        | 0.064382657  | 1.159503675  | 0.247107359 | 0.417991676 | no |
| SLC6A5       | -0.064371128 | -1.159295177 | 0.247192183 | 0.41806618  | no |
| C3orf67      | 0.064369432  | 1.159264505  | 0.247204663 | 0.41806618  | no |
| USMG5        | -0.064366972 | -1.159220024 | 0.247222762 | 0.41806618  | no |
| ANKRD40      | -0.064366095 | -1.159204165 | 0.247229216 | 0.41806618  | no |
| PAGE2        | 0.064341573  | 1.158760697  | 0.247409721 | 0.418338498 | no |
| AWAT2        | -0.064330993 | -1.15856936  | 0.247487629 | 0.418437309 | no |
| LOC100131635 | -0.0643283   | -1.158520658 | 0.247507462 | 0.418437923 | no |
| AGFG2        | 0.064314167  | 1.158265069  | 0.247611566 | 0.418580993 | no |
| KCNG2        | 0.06431123   | 1.158211955  | 0.247633203 | 0.418584645 | no |
| FLJ13197     | -0.064297205 | -1.157958339 | 0.24773654  | 0.418726385 | no |
| PTS          | -0.064294007 | -1.157900489 | 0.247760115 | 0.4187333   | no |
| E2F1         | -0.064285172 | -1.157740722 | 0.247825233 | 0.418810418 | no |
| TMEM189-UBE2 | -0.064268352 | -1.157436556 | 0.247949238 | 0.418977513 | no |
| CCDC88C      | -0.064266472 | -1.157402559 | 0.247963101 | 0.418977513 | no |
| ATAD3B       | -0.064255372 | -1.157201814 | 0.248044969 | 0.419082895 | no |
| DEFB135      | -0.064242288 | -1.156965202 | 0.248141489 | 0.419213013 | no |
| SHROOM1      | 0.064223898  | 1.156632642  | 0.248277193 | 0.419386544 | no |
| UBOX5-AS1    | -0.064220911 | -1.156578617 | 0.248299243 | 0.419386544 | no |
| SLC35F4      | -0.064220436 | -1.156570028 | 0.248302749 | 0.419386544 | no |
| NBR2         | -0.064210922 | -1.15639799  | 0.248372976 | 0.419472191 | no |
| TTC26        | 0.064207034  | 1.156327665  | 0.248401688 | 0.419487716 | no |
| C17orf74     | -0.064190162 | -1.156022557 | 0.248526279 | 0.419665143 | no |
| CTNNAL1      | 0.064157089  | 1.155424478  | 0.248770635 | 0.420044761 | no |
| MTF2         | 0.064147441  | 1.155250008  | 0.248841949 | 0.420128644 | no |
| RHOBTB1      | 0.064145079  | 1.15520729   | 0.248859412 | 0.420128644 | no |
| MAX          | -0.064134239 | -1.155011256 | 0.248939562 | 0.420230942 | no |
| RNASEH2A     | -0.064126775 | -1.154876291 | 0.248994754 | 0.420291098 | no |
| METTL12      | -0.064115291 | -1.15466861  | 0.249079699 | 0.420375636 | no |
| TFCP2        | -0.064114715 | -1.154658197 | 0.249083958 | 0.420375636 | no |
| SHBG         | -0.064109659 | -1.154566765 | 0.249121362 | 0.420405747 | no |
| SPRED2       | 0.064091152  | 1.15423209   | 0.249258308 | 0.420603824 | no |
| ADARB1       | 0.064086201  | 1.15414257   | 0.249294948 | 0.420632624 | no |
| SCARNA11     | -0.064081457 | -1.154056775 | 0.249330067 | 0.420658853 | no |
| C10orf53     | -0.064057278 | -1.153619534 | 0.249509098 | 0.42088875  | no |
| TECTB        | 0.064055406  | 1.153585685  | 0.249522961 | 0.42088875  | no |
| TBC1D9B      | 0.06405512   | 1.153580504  | 0.249525083 | 0.42088875  | no |
| KIAA0355     | 0.064037111  | 1.153254841  | 0.249658493 | 0.421080731 | no |
| ARHGEF7      | -0.064028917 | -1.153106677 | 0.249719205 | 0.421150078 | no |
| NCOA3        | 0.064023621  | 1.153010915  | 0.249758451 | 0.42118294  | no |
| OR4K14       | -0.064020999 | -1.152963494 | 0.249777887 | 0.42118294  | no |
| FAM222A-AS1  | -0.063993958 | -1.152474501 | 0.249978367 | 0.421487924 | no |
| KRTAP5-2     | -0.063969215 | -1.15202707  | 0.250161905 | 0.421764298 | no |
| FIP1L1       | -0.063960973 | -1.151878039 | 0.25022306  | 0.421834309 | no |
| PLXNA3       | 0.063945493  | 1.151598098  | 0.250337961 | 0.42199491  | no |

|              |              |              |             |             |    |
|--------------|--------------|--------------|-------------|-------------|----|
| C19orf77     | -0.063919983 | -1.151136803 | 0.250527379 | 0.42228109  | no |
| SEH1L        | -0.063914164 | -1.151031579 | 0.2505706   | 0.422299313 | no |
| SAC3D1       | -0.063913236 | -1.151014807 | 0.25057749  | 0.422299313 | no |
| FAT2         | 0.063900297  | 1.150780835  | 0.250673616 | 0.422428188 | no |
| LINC00665    | -0.063873823 | -1.150302102 | 0.250870382 | 0.422726625 | no |
| HTR3E        | 0.063841765  | 1.14972241   | 0.251108788 | 0.423076495 | no |
| RNH1         | 0.063840609  | 1.149701506  | 0.251117388 | 0.423076495 | no |
| LOC728989    | -0.063837894 | -1.149652419 | 0.251137583 | 0.423077353 | no |
| LOC646168    | 0.063817281  | 1.149279684  | 0.251290972 | 0.423301896 | no |
| PKDREJ       | -0.063814689 | -1.149232814 | 0.251310264 | 0.423301896 | no |
| CCDC134      | 0.063802691  | 1.149015848  | 0.251399585 | 0.42341916  | no |
| CRYGD        | -0.063795381 | -1.148883673 | 0.25145401  | 0.423449918 | no |
| KCNIP1       | 0.063794945  | 1.148875795  | 0.251457254 | 0.423449918 | no |
| ACSBG2       | -0.063788948 | -1.148767342 | 0.251501918 | 0.423491947 | no |
| FDPSL2A      | -0.063785301 | -1.148701404 | 0.251529076 | 0.423504494 | no |
| ARPC5L       | 0.06376422   | 1.148320202  | 0.25168612  | 0.423735716 | no |
| MXD3         | -0.063755075 | -1.148154846 | 0.251754264 | 0.42381724  | no |
| TCP11L1      | -0.063715436 | -1.147438077 | 0.252049795 | 0.424281519 | no |
| TCF19        | 0.063700978  | 1.147176647  | 0.252157646 | 0.424405048 | no |
| APBA3        | 0.063700304  | 1.147164457  | 0.252162675 | 0.424405048 | no |
| C1orf158     | 0.063672931  | 1.146669501  | 0.252366957 | 0.424715605 | no |
| MYH6         | -0.063665493 | -1.14653501  | 0.252422485 | 0.42477579  | no |
| PCDHB12      | -0.063661929 | -1.146470557 | 0.252449099 | 0.424787315 | no |
| CDCA5        | -0.063657646 | -1.146393107 | 0.252481082 | 0.424807871 | no |
| ZNF121       | -0.063628489 | -1.145865906 | 0.252698868 | 0.425141019 | no |
| NCLN         | 0.063623192  | 1.145770124  | 0.25273845  | 0.425174327 | no |
| C8orf69      | 0.06361297   | 1.145585277  | 0.252814849 | 0.425269562 | no |
| BVES-AS1     | 0.063595179  | 1.145263596  | 0.252947842 | 0.425459973 | no |
| CSTF2        | -0.063584032 | -1.145062039 | 0.253031198 | 0.425566871 | no |
| ZNF622       | -0.063578413 | -1.144960424 | 0.253073228 | 0.425573103 | no |
| TMEM50B      | -0.063578241 | -1.144957331 | 0.253074508 | 0.425573103 | no |
| SERPINE2     | 0.063572629  | 1.144855849  | 0.253116488 | 0.4255812   | no |
| CNGA3        | 0.063572303  | 1.144849951  | 0.253118929 | 0.4255812   | no |
| LOC100129027 | -0.063566107 | -1.144737918 | 0.25316528  | 0.425625834 | no |
| ZNF579       | -0.063555347 | -1.144543359 | 0.253245789 | 0.425727883 | no |
| C6orf132     | 0.063546964  | 1.144391789  | 0.253308522 | 0.425800034 | no |
| NT5DC2       | -0.063536283 | -1.144198659 | 0.253388471 | 0.425901113 | no |
| RAB5A        | -0.063529678 | -1.144079231 | 0.253437919 | 0.425950912 | no |
| NSUN3        | 0.063512166  | 1.143762576  | 0.253569059 | 0.426133284 | no |
| AGBL4        | -0.063509893 | -1.143721473 | 0.253586086 | 0.426133284 | no |
| C9orf170     | 0.063495496  | 1.143461165  | 0.253693931 | 0.426281178 | no |
| AP3B1        | 0.063485984  | 1.143289172  | 0.253765205 | 0.426367604 | no |
| AP1B1        | 0.06346733   | 1.142951885  | 0.253905018 | 0.426569164 | no |
| PIPSL        | -0.06346345  | -1.142881722 | 0.253934109 | 0.42658469  | no |
| C20orf166-AS | -0.063457661 | -1.142777045 | 0.253977515 | 0.426624259 | no |
| PLGRKT       | 0.063438418  | 1.142429109  | 0.254121827 | 0.426833309 | no |
| KCNMB2-IT1   | 0.063434395  | 1.142356371  | 0.254152004 | 0.426842424 | no |
| MT01         | -0.063432399 | -1.142320282 | 0.254166977 | 0.426842424 | no |
| STAB2        | -0.063425998 | -1.142204554 | 0.254214996 | 0.426889707 | no |
| NPB          | -0.063402083 | -1.141772141 | 0.254394472 | 0.427157716 | no |
| PRR23A       | -0.063373135 | -1.141248728 | 0.254611838 | 0.427485337 | no |

|              |              |              |             |             |    |
|--------------|--------------|--------------|-------------|-------------|----|
| LOC645513    | -0.063368527 | -1.1411654   | 0.254646455 | 0.427485337 | no |
| NMU          | -0.063368153 | -1.141158643 | 0.254649262 | 0.427485337 | no |
| TTC9C        | 0.06335532   | 1.140926613  | 0.254745672 | 0.427613781 | no |
| FKTN         | -0.063336973 | -1.14059488  | 0.254883553 | 0.427811812 | no |
| CHRNA2       | -0.063309945 | -1.140106196 | 0.255086765 | 0.428090619 | no |
| TBCEL        | -0.063309581 | -1.140099617 | 0.255089501 | 0.428090619 | no |
| TESK2        | -0.063294365 | -1.139824486 | 0.255203961 | 0.428187482 | no |
| TMEM184A     | 0.06329427   | 1.139822783  | 0.255204669 | 0.428187482 | no |
| TRAF1        | 0.063293962  | 1.139817202  | 0.255206992 | 0.428187482 | no |
| YOD1         | -0.06327384  | -1.139453385 | 0.255358402 | 0.428408074 | no |
| CELF2        | -0.063253123 | -1.139078804 | 0.255514359 | 0.428591676 | no |
| GUK1         | -0.063251352 | -1.139046783 | 0.255527694 | 0.428591676 | no |
| CNTN2        | -0.063250546 | -1.139032216 | 0.25553376  | 0.428591676 | no |
| LOC284379    | -0.063248706 | -1.138998955 | 0.255547612 | 0.428591676 | no |
| C12orf45     | 0.063245622  | 1.138943196  | 0.255570835 | 0.428597177 | no |
| SPR          | 0.063228827  | 1.138639524  | 0.255697337 | 0.428775863 | no |
| TSFM         | -0.063221279 | -1.138503064 | 0.255754197 | 0.42880986  | no |
| SPATA7       | -0.063220839 | -1.138495097 | 0.255757516 | 0.42880986  | no |
| TNFSF11      | 0.063213373  | 1.138360106  | 0.255813773 | 0.428870723 | no |
| RNF2         | -0.063209392 | -1.13828813  | 0.255843773 | 0.42888756  | no |
| FAM49A       | -0.063206095 | -1.138228525 | 0.255868617 | 0.428895753 | no |
| EME2         | 0.063196299  | 1.138051403  | 0.255942456 | 0.428963022 | no |
| PMS2         | -0.063195475 | -1.138036503 | 0.255948668 | 0.428963022 | no |
| GRIK1-AS2    | 0.063177995  | 1.137720453  | 0.256080463 | 0.429150439 | no |
| FSBP         | 0.06316359   | 1.137460012  | 0.256189104 | 0.429299029 | no |
| ATP2C1       | -0.063159976 | -1.137394666 | 0.256216368 | 0.429311239 | no |
| NAA60        | -0.063156627 | -1.137334118 | 0.256241631 | 0.429320098 | no |
| LOC100133331 | 0.063133605  | 1.136917876  | 0.256415355 | 0.429577673 | no |
| FOXD4L6      | -0.063121483 | -1.136698705 | 0.256506862 | 0.42969748  | no |
| PRB2         | -0.063116255 | -1.136604186 | 0.256546332 | 0.429730103 | no |
| BDNF         | -0.063109253 | -1.136477598 | 0.2565992   | 0.429785162 | no |
| GSTCD        | -0.063102164 | -1.136349429 | 0.256652736 | 0.429841331 | no |
| MAPK3        | 0.0630981    | 1.136275944  | 0.256683435 | 0.429859245 | no |
| KRTAP19-4    | -0.063092354 | -1.136172059 | 0.256726837 | 0.42989843  | no |
| ELMO3        | -0.063086682 | -1.136069501 | 0.256769689 | 0.429936688 | no |
| IGFBP2       | 0.063065606  | 1.135688458  | 0.256928948 | 0.430169837 | no |
| PPIP5K2      | 0.063052088  | 1.135444039  | 0.25703114  | 0.430307411 | no |
| HIST2H2AB    | -0.063045593 | -1.135326615 | 0.257080245 | 0.430356096 | no |
| UBE2DNL      | -0.063042587 | -1.135272264 | 0.257102977 | 0.430360625 | no |
| ETV4         | -0.063035149 | -1.13513779  | 0.257159223 | 0.430421252 | no |
| IGF1         | 0.063029936  | 1.13504355   | 0.257198647 | 0.430453712 | no |
| WDR60        | -0.06301116  | -1.134704069 | 0.257340696 | 0.430640971 | no |
| CEP70        | -0.063009849 | -1.134680377 | 0.257350611 | 0.430640971 | no |
| RNU4ATAC     | -0.063006892 | -1.134626918 | 0.257372986 | 0.43064488  | no |
| COX4I2       | 0.062998025  | 1.134466599  | 0.257440093 | 0.430691156 | no |
| WIZ          | -0.062997942 | -1.134465093 | 0.257440724 | 0.430691156 | no |
| LOC100128787 | 0.062994659  | 1.13440575   | 0.257465567 | 0.43069919  | no |
| CHUK         | 0.062986019  | 1.134249533  | 0.257530973 | 0.430750702 | no |
| CADM2-AS2    | -0.062985296 | -1.134236462 | 0.257536447 | 0.430750702 | no |
| C8orf47      | -0.062980585 | -1.134151297 | 0.25757211  | 0.430776826 | no |
| ZNF703       | 0.062967749  | 1.13391921   | 0.257669314 | 0.430905862 | no |

|           |              |              |             |             |    |
|-----------|--------------|--------------|-------------|-------------|----|
| TRIM36    | -0.062961974 | -1.133814802 | 0.257713052 | 0.430945471 | no |
| RFC3      | -0.062933652 | -1.133302752 | 0.257927629 | 0.431238843 | no |
| OR2T29    | -0.062930694 | -1.133249281 | 0.257950043 | 0.431238843 | no |
| SOCS5     | -0.062928317 | -1.133206308 | 0.257968058 | 0.431238843 | no |
| ASXL1     | -0.062926401 | -1.133171672 | 0.257982579 | 0.431238843 | no |
| SH2D7     | -0.062925577 | -1.133156776 | 0.257988824 | 0.431238843 | no |
| CERK      | -0.062912142 | -1.132913865 | 0.258090677 | 0.431368956 | no |
| C2orf74   | -0.062910014 | -1.1328754   | 0.258106808 | 0.431368956 | no |
| UBE2D3    | 0.062888341  | 1.13248356   | 0.258271174 | 0.431591412 | no |
| NDUFAF6   | -0.062883044 | -1.1323878   | 0.258311353 | 0.431591412 | no |
| FAM43B    | 0.062882884  | 1.132384907  | 0.258312568 | 0.431591412 | no |
| CCNO      | 0.062877447  | 1.132286609  | 0.258353817 | 0.431591412 | no |
| LINC00639 | 0.062875736  | 1.132255664  | 0.258366803 | 0.431591412 | no |
| LSM4      | -0.062875274 | -1.13224732  | 0.258370305 | 0.431591412 | no |
| LOC645249 | -0.062873932 | -1.132223052 | 0.25838049  | 0.431591412 | no |
| HSPA2     | -0.062847794 | -1.131750496 | 0.25857887  | 0.431889212 | no |
| CAMK2D    | 0.062841488  | 1.131636496  | 0.258626743 | 0.431935602 | no |
| TMEM191C  | -0.062836033 | -1.131537868 | 0.258668166 | 0.431971214 | no |
| NLRP4     | 0.062826873  | 1.131372274  | 0.258737724 | 0.432045348 | no |
| SLC29A4   | -0.062824893 | -1.13133647  | 0.258752765 | 0.432045348 | no |
| TMEM183B  | 0.062781373  | 1.130549678  | 0.259083451 | 0.432563894 | no |
| CYP26B1   | -0.062771149 | -1.130364834 | 0.259161183 | 0.432660063 | no |
| HMCN1     | 0.062764846  | 1.130250872  | 0.259209116 | 0.432706471 | no |
| AGTPBP1   | -0.062758326 | -1.130133007 | 0.259258696 | 0.432755622 | no |
| RPS12     | -0.06274576  | -1.129905825 | 0.259354279 | 0.432881549 | no |
| MIR181A2  | -0.062734039 | -1.129693931 | 0.259443453 | 0.432996757 | no |
| PPIH      | 0.06272594   | 1.129547512  | 0.259505084 | 0.433065986 | no |
| FANCM     | -0.062696357 | -1.129012677 | 0.259730296 | 0.433408167 | no |
| AMFR      | 0.062687464  | 1.128851915  | 0.259798017 | 0.433487514 | no |
| LEMD1     | -0.06267797  | -1.128680275 | 0.259870334 | 0.433574517 | no |
| GLI4      | -0.062675059 | -1.128627638 | 0.259892515 | 0.433577863 | no |
| ARID1A    | -0.062629564 | -1.127805158 | 0.260239266 | 0.434122647 | no |
| LOC148696 | -0.062607806 | -1.127411805 | 0.260405214 | 0.43436576  | no |
| C7orf50   | 0.062594025  | 1.127162663  | 0.26051036  | 0.434507423 | no |
| ITGB3BP   | 0.062586192  | 1.127021064  | 0.260570133 | 0.43454155  | no |
| PCDHGB1   | -0.062586044 | -1.127018394 | 0.26057126  | 0.43454155  | no |
| FSCN2     | 0.062580394  | 1.126916242  | 0.260614387 | 0.434579748 | no |
| SNORA41   | -0.062575319 | -1.126824504 | 0.260653122 | 0.434610617 | no |
| OVOL3     | -0.062569325 | -1.126716134 | 0.260698884 | 0.434653198 | no |
| C10orf82  | -0.062562052 | -1.126584657 | 0.260754412 | 0.434712052 | no |
| PJA2      | -0.062556915 | -1.126491784 | 0.26079364  | 0.434743726 | no |
| DEFB103B  | 0.062547614  | 1.126323645  | 0.260864671 | 0.434817144 | no |
| LRRC45    | -0.062544497 | -1.126267296 | 0.260888479 | 0.434817144 | no |
| PLLP      | 0.062543201  | 1.126243864  | 0.260898379 | 0.434817144 | no |
| GNRH2     | 0.062527285  | 1.125956122  | 0.261019978 | 0.434963236 | no |
| GPRIN2    | -0.062526429 | -1.125940655 | 0.261026516 | 0.434963236 | no |
| IL13      | 0.06252172   | 1.125855522  | 0.261062501 | 0.434981739 | no |
| CRYAA     | -0.06251746  | -1.125778515 | 0.261095055 | 0.434981739 | no |
| NSRP1     | -0.06251703  | -1.125770743 | 0.26109834  | 0.434981739 | no |
| PMPCB     | -0.062512029 | -1.125680323 | 0.261136568 | 0.435011702 | no |
| ANKRD20A3 | -0.062504571 | -1.125545511 | 0.26119357  | 0.435044754 | no |

|              |              |              |             |             |    |
|--------------|--------------|--------------|-------------|-------------|----|
| MIR219-1     | -0.062504137 | -1.125537649 | 0.261196895 | 0.435044754 | no |
| SMYD4        | 0.062501327  | 1.125486863  | 0.261218371 | 0.435046808 | no |
| PLA2G2A      | 0.062496753  | 1.125404166  | 0.261253344 | 0.435071338 | no |
| SPATA31A6    | -0.062491291 | -1.12530542  | 0.261295109 | 0.435107175 | no |
| TARDBP       | -0.062482218 | -1.125141409 | 0.261364488 | 0.435188984 | no |
| DCAF4        | 0.062473089  | 1.124976367  | 0.261434316 | 0.435244208 | no |
| NEUROG1      | -0.062472586 | -1.124967285 | 0.261438159 | 0.435244208 | no |
| C4orf26      | -0.062467317 | -1.124872023 | 0.261478471 | 0.4352776   | no |
| LINC00314    | 0.062458182  | 1.124706887  | 0.26154836  | 0.435333973 | no |
| PDK4         | -0.062457596 | -1.124696282 | 0.261552848 | 0.435333973 | no |
| SLC36A2      | -0.062443761 | -1.124446177 | 0.261658724 | 0.435446423 | no |
| NEK11        | 0.062443472  | 1.12444096   | 0.261660933 | 0.435446423 | no |
| PCDHGA11     | -0.062439645 | -1.124371775 | 0.261690226 | 0.435457788 | no |
| LINC00398    | 0.062437286  | 1.124329121  | 0.261708287 | 0.435457788 | no |
| C9orf142     | -0.062428861 | -1.124176827 | 0.26177278  | 0.435531378 | no |
| ZNF791       | -0.062420522 | -1.12402607  | 0.261836632 | 0.435603891 | no |
| SERP1        | 0.062415079  | 1.123927675  | 0.261878313 | 0.43563951  | no |
| TMPRSS6      | 0.062402645  | 1.12370289   | 0.261973552 | 0.43576421  | no |
| LOC440970    | -0.062391503 | -1.123501474 | 0.262058909 | 0.435846051 | no |
| PGBD2        | 0.062390928  | 1.123491082  | 0.262063313 | 0.435846051 | no |
| LOC153910    | -0.062380447 | -1.123301611 | 0.262143627 | 0.435923743 | no |
| PCED1A       | -0.062379538 | -1.123285173 | 0.262150596 | 0.435923743 | no |
| LOC285692    | -0.062372943 | -1.123165962 | 0.262201137 | 0.435974053 | no |
| ZNF850       | -0.062348288 | -1.122720247 | 0.262390165 | 0.436248582 | no |
| NFXL1        | -0.062346113 | -1.122680937 | 0.262406841 | 0.436248582 | no |
| GNPTAB       | 0.062338743  | 1.122547698  | 0.262463368 | 0.436308806 | no |
| VHL          | -0.062311903 | -1.122062505 | 0.262669286 | 0.436604943 | no |
| LOC100192426 | -0.062308683 | -1.122004301 | 0.262693995 | 0.436604943 | no |
| KRT17        | -0.062307581 | -1.121984368 | 0.262702458 | 0.436604943 | no |
| MFAP3        | -0.062300114 | -1.121849396 | 0.262759765 | 0.436666418 | no |
| SKP2         | 0.062291675  | 1.121696838  | 0.26282455  | 0.436740308 | no |
| ZNF595       | -0.062288193 | -1.121633887 | 0.262851286 | 0.436750965 | no |
| C3orf80      | -0.062284189 | -1.121561516 | 0.262882025 | 0.436768272 | no |
| PDCL3        | 0.062269493  | 1.121295843  | 0.262994888 | 0.436911859 | no |
| SNORA72      | -0.062267641 | -1.121262377 | 0.263009107 | 0.436911859 | no |
| GSG1         | -0.062264507 | -1.12120571  | 0.263033186 | 0.436918086 | no |
| CCDC137      | 0.062249067  | 1.1209266    | 0.263151806 | 0.437080233 | no |
| PRICKLE2-AS2 | -0.062246507 | -1.120880322 | 0.263171477 | 0.437080233 | no |
| MIR205       | 0.062221514  | 1.120428519  | 0.263363579 | 0.43736548  | no |
| SLC22A23     | 0.062197896  | 1.120001579  | 0.263545198 | 0.437627787 | no |
| LOC100505633 | -0.062195678 | -1.119961491 | 0.263562256 | 0.437627787 | no |
| SP9          | -0.062174613 | -1.119580702 | 0.263724324 | 0.43786306  | no |
| RNF169       | -0.06216402  | -1.119389197 | 0.263805856 | 0.437964593 | no |
| DNAJA3       | -0.062143151 | -1.119011967 | 0.263966511 | 0.438197458 | no |
| MARS2        | -0.062137728 | -1.118913934 | 0.264008273 | 0.438232934 | no |
| ZNF229       | -0.062119484 | -1.118584135 | 0.264148799 | 0.438421482 | no |
| TMPRSS11A    | 0.062117684  | 1.118551607  | 0.264162662 | 0.438421482 | no |
| MAPK14       | -0.062105253 | -1.118326894 | 0.264258445 | 0.438546582 | no |
| HHIPL1       | -0.062068281 | -1.117658561 | 0.26454346  | 0.438956878 | no |
| CYP20A1      | -0.062067883 | -1.117651363 | 0.26454653  | 0.438956878 | no |
| CHCHD2       | -0.06206357  | -1.1175734   | 0.264579793 | 0.438965662 | no |

|              |              |              |             |             |    |
|--------------|--------------|--------------|-------------|-------------|----|
| MOV10L1      | -0.0620619   | -1.117543206 | 0.264592675 | 0.438965662 | no |
| LOC100505989 | -0.06205903  | -1.117491327 | 0.264614811 | 0.438968499 | no |
| RGL1         | 0.062027034  | 1.116912949  | 0.264861682 | 0.43934412  | no |
| RPS15AP10    | -0.062011085 | -1.116624654 | 0.264984796 | 0.439514413 | no |
| TMPRSS7      | 0.062001635  | 1.116453831  | 0.265057763 | 0.439601511 | no |
| CCDC104      | -0.06197057  | -1.115892299 | 0.265297719 | 0.439965528 | no |
| MFAP5        | 0.061938163  | 1.115306505  | 0.265548203 | 0.440305007 | no |
| CLK4         | -0.06193678  | -1.1152815   | 0.265558898 | 0.440305007 | no |
| POMC         | 0.061936135  | 1.115269836  | 0.265563887 | 0.440305007 | no |
| DOM3Z        | -0.061918401 | -1.114949285 | 0.265701029 | 0.440498404 | no |
| ARMCX6       | 0.061908299  | 1.114766686  | 0.265779173 | 0.440593968 | no |
| GLIS1        | -0.061905158 | -1.114709894 | 0.26580348  | 0.440600277 | no |
| GSTA3        | -0.06190032  | -1.114622451 | 0.265840909 | 0.440628334 | no |
| C15orf39     | -0.061897288 | -1.114567636 | 0.265864374 | 0.440633243 | no |
| SLURP1       | -0.061886815 | -1.114378334 | 0.265945421 | 0.440733578 | no |
| WNT11        | -0.061878665 | -1.114231007 | 0.266008509 | 0.440804138 | no |
| CCDC60       | -0.061874682 | -1.114159026 | 0.266039336 | 0.44082123  | no |
| SDHAF1       | -0.061868537 | -1.114047946 | 0.266086912 | 0.440863101 | no |
| TRPC4AP      | 0.06186612   | 1.114004243  | 0.266105632 | 0.440863101 | no |
| LOC100131234 | -0.061841623 | -1.113561439 | 0.266295358 | 0.441143416 | no |
| AP4B1-AS1    | -0.061832038 | -1.113388196 | 0.266369611 | 0.441232412 | no |
| CCT5         | -0.061816389 | -1.113105317 | 0.266490887 | 0.44139928  | no |
| POM121C      | 0.061797569  | 1.11276514   | 0.266636778 | 0.441586175 | no |
| NOX3         | -0.061796532 | -1.112746396 | 0.266644818 | 0.441586175 | no |
| SNORD17      | -0.061778633 | -1.112422855 | 0.266783628 | 0.441782013 | no |
| TLK2         | -0.061773031 | -1.112321596 | 0.266827082 | 0.441819927 | no |
| ZNF321P      | 0.061764763  | 1.112172154  | 0.266891222 | 0.441892085 | no |
| TSGA10IP     | 0.061761551  | 1.112114088  | 0.266916147 | 0.441894713 | no |
| PRDM8        | -0.061759258 | -1.112072654 | 0.266933933 | 0.441894713 | no |
| CCDC39       | 0.06175431   | 1.111983206  | 0.266972333 | 0.441913756 | no |
| PLEKHG6      | 0.061752476  | 1.111950064  | 0.266986562 | 0.441913756 | no |
| MLYCD        | -0.061746272 | -1.111837915 | 0.267034715 | 0.441959419 | no |
| EIF2B3       | 0.06174317   | 1.11178185   | 0.267058789 | 0.441965227 | no |
| INIP         | -0.061739003 | -1.111706526 | 0.267091136 | 0.441984724 | no |
| APOL5        | 0.06173562   | 1.111645377  | 0.267117398 | 0.441994148 | no |
| BAGE3        | -0.06171711  | -1.111310797 | 0.267261121 | 0.442197918 | no |
| SPAG5        | -0.061713938 | -1.111253467 | 0.267285753 | 0.442204628 | no |
| RUSC1-AS1    | -0.061691009 | -1.110839015 | 0.267463872 | 0.44246525  | no |
| MYL3         | -0.061681753 | -1.110671719 | 0.267535793 | 0.442550164 | no |
| LOC100129316 | 0.061655661  | 1.110200087  | 0.267738623 | 0.442851594 | no |
| AMMECR1L     | -0.061649648 | -1.110091404 | 0.267785379 | 0.442894842 | no |
| B3GALT1      | -0.061646687 | -1.110037893 | 0.267808401 | 0.442898834 | no |
| LOC643486    | -0.061638415 | -1.109888369 | 0.267872739 | 0.442971148 | no |
| GPR52        | -0.06163117  | -1.109757415 | 0.267929096 | 0.443004821 | no |
| CETN3        | -0.061628554 | -1.10971014  | 0.267949442 | 0.443004821 | no |
| SMA5         | 0.061627847  | 1.109697361  | 0.267954943 | 0.443004821 | no |
| LHX3         | -0.06161927  | -1.109542327 | 0.268021677 | 0.443080016 | no |
| SYCN         | -0.061616702 | -1.109495912 | 0.268041659 | 0.443080016 | no |
| FES          | 0.061603172  | 1.109251356  | 0.268146956 | 0.443219985 | no |
| ABCC5        | -0.061586385 | -1.108947933 | 0.26827764  | 0.443401889 | no |
| CHRM2        | -0.061576332 | -1.108766225 | 0.268355922 | 0.443497164 | no |



|              |              |              |             |             |    |
|--------------|--------------|--------------|-------------|-------------|----|
| CYB5D2       | -0.061548287 | -1.108259311 | 0.268574391 | 0.443824086 | no |
| ITGAV        | -0.061537617 | -1.108066459 | 0.268657538 | 0.443927353 | no |
| C12orf68     | -0.06152214  | -1.107786703 | 0.268778185 | 0.444092564 | no |
| ARID5B       | 0.061514212  | 1.10764341   | 0.268839996 | 0.444160543 | no |
| CSRP1        | -0.061495507 | -1.107305332 | 0.268985868 | 0.444367383 | no |
| FANCD20S     | -0.061488363 | -1.107176206 | 0.269041596 | 0.444425284 | no |
| RPL13        | -0.061474446 | -1.106924667 | 0.26915018  | 0.44457048  | no |
| SLC4A2       | 0.061467739  | 1.106803436  | 0.269202523 | 0.444622766 | no |
| SNORA36B     | -0.061457378 | -1.106616164 | 0.269283394 | 0.444722157 | no |
| C17orf67     | 0.061442342  | 1.106344389  | 0.269400787 | 0.444881844 | no |
| ATP5J2-PTCD1 | 0.061432443  | 1.106165483  | 0.269478085 | 0.444968654 | no |
| KCNN4        | 0.061428705  | 1.106097905  | 0.269507286 | 0.444968654 | no |
| SGPP1        | 0.061427657  | 1.106078966  | 0.26951547  | 0.444968654 | no |
| PATE2        | -0.061411522 | -1.105787335 | 0.269641516 | 0.445142558 | no |
| ATF2         | -0.061408779 | -1.105737763 | 0.269662946 | 0.445143741 | no |
| GAB4         | -0.061395307 | -1.105494268 | 0.269768223 | 0.445283325 | no |
| EVPLL        | -0.061384205 | -1.10529361  | 0.269855002 | 0.445392354 | no |
| LOC283299    | -0.061376526 | -1.105154816 | 0.269915037 | 0.44545723  | no |
| ACOT7        | -0.061361189 | -1.104877606 | 0.270034971 | 0.445620945 | no |
| DPEP1        | 0.061352719  | 1.104724516  | 0.270101221 | 0.445696048 | no |
| SMG8         | -0.061333162 | -1.104371037 | 0.270254232 | 0.445914295 | no |
| PPIAP30      | -0.0613272   | -1.104263287 | 0.270300885 | 0.445957034 | no |
| LOC643669    | -0.061322265 | -1.104174089 | 0.270339511 | 0.445983859 | no |
| LINC00571    | 0.06131532   | 1.104048567  | 0.270393872 | 0.445983859 | no |
| TRPC7        | -0.061310362 | -1.103958954 | 0.270432686 | 0.445983859 | no |
| RPL37        | -0.061309707 | -1.10394712  | 0.270437812 | 0.445983859 | no |
| RPL36        | -0.061309428 | -1.103942083 | 0.270439994 | 0.445983859 | no |
| PRKAA2       | -0.061309216 | -1.103938244 | 0.270441657 | 0.445983859 | no |
| ABHD12       | 0.061299012  | 1.103753825  | 0.270521549 | 0.446081378 | no |
| MS4A3        | 0.061286872  | 1.103534402  | 0.270616625 | 0.446180629 | no |
| RIBC2        | 0.061286025  | 1.10351909   | 0.270623261 | 0.446180629 | no |
| TRPM6        | -0.06128302  | -1.103464783 | 0.270646796 | 0.446185202 | no |
| ARGFXP2      | -0.061277656 | -1.103367836 | 0.270688814 | 0.446220243 | no |
| LINC00597    | -0.061274731 | -1.103314958 | 0.270711734 | 0.446223798 | no |
| ANKRD30BP3   | -0.061262593 | -1.103095588 | 0.270806834 | 0.44634632  | no |
| C15orf56     | 0.061250627  | 1.102879311  | 0.270900615 | 0.446466651 | no |
| CDC42BPA     | -0.061247797 | -1.102828172 | 0.270922793 | 0.446468964 | no |
| SRD5A1P1     | 0.061240328  | 1.102693175  | 0.270981345 | 0.446531213 | no |
| UGDH         | 0.06122568   | 1.102428428  | 0.271096198 | 0.446686222 | no |
| ADAMTS17     | -0.06122261  | -1.102372946 | 0.271120271 | 0.44669164  | no |
| FMR1NB       | 0.06121846   | 1.102297929  | 0.271152823 | 0.446711025 | no |
| BUB3         | -0.061211372 | -1.102169833 | 0.271208414 | 0.44676836  | no |
| TRMT61A      | -0.061202507 | -1.102009609 | 0.271277959 | 0.446834779 | no |
| DPRX         | -0.061200932 | -1.101981141 | 0.271290316 | 0.446834779 | no |
| C10orf105    | 0.061185085  | 1.101694725  | 0.271414669 | 0.447005337 | no |
| LPO          | 0.061174205  | 1.101498077  | 0.27150007  | 0.447111724 | no |
| MRPL33       | 0.061161353  | 1.1012658    | 0.271600967 | 0.447243612 | no |
| SPRY3        | -0.061127151 | -1.10064765  | 0.271869608 | 0.447651681 | no |
| ESRRG        | -0.061114173 | -1.100413098 | 0.271971589 | 0.447785292 | no |
| OSR1         | 0.061085388  | 1.099892851  | 0.272197882 | 0.448123539 | no |
| DUSP13       | 0.06105982   | 1.099430762  | 0.272398987 | 0.44842027  | no |

|              |              |              |             |             |    |
|--------------|--------------|--------------|-------------|-------------|----|
| TAF1         | -0.061045263 | -1.09916768  | 0.272513528 | 0.448574465 | no |
| IFNA10       | -0.061040691 | -1.099085034 | 0.272549517 | 0.448585185 | no |
| REEP1        | -0.061039132 | -1.099056861 | 0.272561786 | 0.448585185 | no |
| RNF151       | -0.061025876 | -1.098817287 | 0.272666133 | 0.448704906 | no |
| PLSCR4       | 0.061024586  | 1.098793979  | 0.272676287 | 0.448704906 | no |
| MIR3653      | -0.061020976 | -1.098728735 | 0.272704709 | 0.448717319 | no |
| RLIM         | -0.061005541 | -1.098449778 | 0.272826257 | 0.448882949 | no |
| MC1R         | 0.061002073  | 1.098387098  | 0.272853573 | 0.448888082 | no |
| LOC100507140 | -0.060999841 | -1.098346765 | 0.272871151 | 0.448888082 | no |
| CHODL        | 0.060993673  | 1.098235282  | 0.272919742 | 0.448933653 | no |
| OR2L1P       | 0.060975235  | 1.097902049  | 0.273065021 | 0.44913825  | no |
| PPP1R12A     | -0.060959766 | -1.097622477 | 0.273186947 | 0.449288006 | no |
| ZNF20        | -0.060958379 | -1.097597411 | 0.273197881 | 0.449288006 | no |
| DUSP16       | -0.060947709 | -1.097404581 | 0.273282001 | 0.449358668 | no |
| CLK3         | -0.060945198 | -1.097359208 | 0.273301797 | 0.449358668 | no |
| FGF21        | -0.060944973 | -1.097355131 | 0.273303576 | 0.449358668 | no |
| TSG101       | -0.060913771 | -1.096791227 | 0.27354969  | 0.449728915 | no |
| CEP290       | -0.060901286 | -1.096565597 | 0.273648208 | 0.44985647  | no |
| LINC00029    | 0.060894177  | 1.096437108  | 0.273704321 | 0.4499143   | no |
| TP53BP1      | -0.060886216 | -1.096293234 | 0.273767163 | 0.449983181 | no |
| FAM166A      | 0.060873258  | 1.096059054  | 0.273869471 | 0.450043709 | no |
| FAM96B       | -0.060872609 | -1.096047327 | 0.273874594 | 0.450043709 | no |
| NASP         | 0.060872609  | 1.096047317  | 0.273874599 | 0.450043709 | no |
| PHB2         | -0.060870943 | -1.096017214 | 0.273887752 | 0.450043709 | no |
| ZCCHC10      | -0.060850176 | -1.0956419   | 0.274051779 | 0.450278807 | no |
| TRIM16L      | -0.06084343  | -1.09551998  | 0.274105078 | 0.45033195  | no |
| FAM22F       | -0.060816704 | -1.095036979 | 0.274316297 | 0.450626107 | no |
| ZNF573       | -0.060811998 | -1.094951939 | 0.274353497 | 0.450626107 | no |
| TXNDC17      | 0.060811698  | 1.09494651   | 0.274355871 | 0.450626107 | no |
| FAM169B      | -0.060810164 | -1.094918794 | 0.274367996 | 0.450626107 | no |
| CHAF1B       | 0.060804972  | 1.094824957  | 0.27440905  | 0.450659093 | no |
| COL25A1      | -0.060797689 | -1.09469334  | 0.27446664  | 0.450719229 | no |
| RPL13P5      | 0.060790165  | 1.094557352  | 0.27452615  | 0.450782511 | no |
| TAF12        | 0.060787305  | 1.094505668  | 0.27454877  | 0.450785211 | no |
| ITFG1        | -0.060775729 | -1.094296464 | 0.274640344 | 0.450888599 | no |
| H19          | 0.060774041  | 1.094265958  | 0.274653699 | 0.450888599 | no |
| NAPA         | 0.060765218  | 1.094106502  | 0.274723513 | 0.450968761 | no |
| CT49         | 0.060746822  | 1.093774062  | 0.274869104 | 0.451115945 | no |
| RNF113A      | -0.060746799 | -1.093773631 | 0.274869292 | 0.451115945 | no |
| CPN1         | -0.060745933 | -1.09375798  | 0.274876148 | 0.451115945 | no |
| TIRAP        | 0.060741412  | 1.09367628   | 0.274911937 | 0.451140229 | no |
| KIAA2018     | -0.060733029 | -1.093524788 | 0.274978307 | 0.45121469  | no |
| SLC30A4      | -0.060725975 | -1.093397299 | 0.275034169 | 0.451271899 | no |
| RPL26L1      | 0.060711407  | 1.093134041  | 0.275149547 | 0.451426744 | no |
| LOC643401    | 0.060708195  | 1.093075988  | 0.275174994 | 0.451426854 | no |
| LOC100527964 | -0.060706096 | -1.093038049 | 0.275191625 | 0.451426854 | no |
| LOC440600    | -0.060700219 | -1.092931845 | 0.275238186 | 0.451468772 | no |
| TGIF2        | 0.060691907  | 1.092781633  | 0.275304048 | 0.451542342 | no |
| STIM2        | -0.060686822 | -1.092689725 | 0.275344352 | 0.451571897 | no |
| NSMCE4A      | -0.060684331 | -1.092644712 | 0.275364093 | 0.451571897 | no |
| LOC284385    | -0.06067975  | -1.092561931 | 0.275400399 | 0.451596977 | no |

|              |              |              |             |             |    |
|--------------|--------------|--------------|-------------|-------------|----|
| RGS5         | -0.060674532 | -1.092467632 | 0.275441761 | 0.451603469 | no |
| GJC2         | -0.060673949 | -1.09245709  | 0.275446386 | 0.451603469 | no |
| POMGNT1      | 0.060668384  | 1.092356516  | 0.275490505 | 0.45164135  | no |
| SORD         | -0.060663552 | -1.0922692   | 0.275528813 | 0.451669696 | no |
| MOB1B        | 0.060651535  | 1.092052035  | 0.275624104 | 0.451769359 | no |
| LONRF3       | 0.060650584  | 1.092034837  | 0.275631652 | 0.451769359 | no |
| VIT          | 0.060642737  | 1.09189303   | 0.27569389  | 0.451836909 | no |
| GALK2        | 0.060636644  | 1.091782931  | 0.275742218 | 0.451843107 | no |
| C20orf78     | -0.060635528 | -1.091762755 | 0.275751075 | 0.451843107 | no |
| SPATA22      | -0.060634309 | -1.091740725 | 0.275760746 | 0.451843107 | no |
| WDPCP        | -0.060623208 | -1.091540102 | 0.275848829 | 0.451945669 | no |
| LOC100499484 | -0.060621119 | -1.091502366 | 0.275865399 | 0.451945669 | no |
| AP1AR        | 0.060617367  | 1.091434555  | 0.275895177 | 0.45196     | no |
| PPP1R14B     | -0.060593428 | -1.091001944 | 0.2760852   | 0.452236817 | no |
| DPY19L3      | -0.060587383 | -1.09089269  | 0.276133204 | 0.452280977 | no |
| NXF1         | 0.060581649  | 1.090789078  | 0.276178735 | 0.452321078 | no |
| LASP1        | 0.060563625  | 1.090463344  | 0.276321905 | 0.452487655 | no |
| G6PC         | -0.060563543 | -1.09046187  | 0.276322553 | 0.452487655 | no |
| PDSS1        | -0.060552437 | -1.09026117  | 0.276410793 | 0.452597665 | no |
| PDLIM5       | 0.060548396  | 1.090188136  | 0.276442908 | 0.452615765 | no |
| FGD5P1       | -0.060540784 | -1.090050582 | 0.2765034   | 0.452680321 | no |
| ZSCAN20      | 0.060535732  | 1.089959273  | 0.276543561 | 0.452711584 | no |
| FOLR1        | 0.060526963  | 1.089800808  | 0.276613268 | 0.452761654 | no |
| FLJ30679     | -0.060526584 | -1.089793957 | 0.276616282 | 0.452761654 | no |
| AP5S1        | 0.060522757  | 1.089724802  | 0.276646707 | 0.452776969 | no |
| LOC441204    | -0.060518367 | -1.089645478 | 0.276681608 | 0.452799607 | no |
| AGAP4        | -0.060494342 | -1.089211297 | 0.276872694 | 0.453032567 | no |
| MKRN1        | -0.060484129 | -1.089026742 | 0.276953945 | 0.453032567 | no |
| LOC100505978 | -0.060483865 | -1.089021971 | 0.276956046 | 0.453032567 | no |
| GPR17        | -0.060483275 | -1.089011311 | 0.276960739 | 0.453032567 | no |
| PDAP1        | -0.060482983 | -1.089006039 | 0.27696306  | 0.453032567 | no |
| ATP6V0D2     | 0.060482591  | 1.088998947  | 0.276966183 | 0.453032567 | no |
| CTBP1        | -0.060480828 | -1.088967087 | 0.276980212 | 0.453032567 | no |
| FBXO46       | -0.060479271 | -1.088938957 | 0.276992599 | 0.453032567 | no |
| LINC00518    | -0.060469324 | -1.08875919  | 0.277071765 | 0.453127563 | no |
| HSBP1        | -0.060465778 | -1.08869511  | 0.277099989 | 0.453139237 | no |
| STT3A        | 0.060461666  | 1.088620818  | 0.277132713 | 0.453158269 | no |
| CAPSL        | 0.060447825  | 1.088370683  | 0.27724291  | 0.453284929 | no |
| ARHGEF3      | 0.060446638  | 1.088349245  | 0.277252356 | 0.453284929 | no |
| ARID3B       | 0.060416809  | 1.08781019   | 0.277489946 | 0.453638858 | no |
| ALG1L        | -0.060395152 | -1.087418833 | 0.277662525 | 0.453886463 | no |
| LOC400794    | -0.060388995 | -1.087307567 | 0.277711604 | 0.453932164 | no |
| SARS         | -0.06037941  | -1.08713435  | 0.277788021 | 0.454003125 | no |
| MIR218-2     | -0.06037825  | -1.087113392 | 0.277797268 | 0.454003125 | no |
| BBOX1        | -0.06037052  | -1.086973708 | 0.277858903 | 0.454037844 | no |
| HOXD10       | 0.060370287  | 1.086969487  | 0.277860766 | 0.454037844 | no |
| ACMSD        | 0.060340457  | 1.086430443  | 0.278098708 | 0.454392103 | no |
| LOC146513    | -0.06033256  | -1.08628773  | 0.278161727 | 0.454435737 | no |
| LRRC3-AS1    | -0.060331811 | -1.086274195 | 0.278167704 | 0.454435737 | no |
| COPS5        | -0.060327852 | -1.086202663 | 0.278199295 | 0.454452801 | no |
| A1CF         | -0.06032103  | -1.086079382 | 0.278253746 | 0.454507202 | no |

|              |              |              |             |             |    |
|--------------|--------------|--------------|-------------|-------------|----|
| PPP1R13L     | 0.060318139  | 1.08602714   | 0.278276823 | 0.454510351 | no |
| TMEM126B     | -0.060292272 | -1.085559708 | 0.278483357 | 0.454813119 | no |
| SCNN1A       | 0.060263783  | 1.085044887  | 0.278710951 | 0.455150232 | no |
| SNAR-E       | 0.060254557  | 1.084878172  | 0.278784681 | 0.455236044 | no |
| MIR3935      | -0.060251193 | -1.084817381 | 0.278811569 | 0.45524536  | no |
| MAGI1-AS1    | -0.06024316  | -1.084672222 | 0.27887578  | 0.455315611 | no |
| R3HDM1       | -0.060237286 | -1.08456608  | 0.278922739 | 0.455343777 | no |
| FRG1B        | 0.060235702  | 1.084537448  | 0.278935407 | 0.455343777 | no |
| TSPAN1       | 0.060228729  | 1.084411445  | 0.27899116  | 0.455400199 | no |
| LINC00516    | -0.06020004  | -1.083893024 | 0.279220632 | 0.455712349 | no |
| C9orf47      | 0.060199519  | 1.083883607  | 0.279224802 | 0.455712349 | no |
| OR5H1        | -0.06019636  | -1.083826526 | 0.279250076 | 0.45571899  | no |
| UNG          | 0.060190104  | 1.08371348   | 0.279300135 | 0.455766075 | no |
| CA1          | 0.060176856  | 1.083474081  | 0.279406165 | 0.455871891 | no |
| IBTK         | -0.060176701 | -1.083471282 | 0.279407405 | 0.455871891 | no |
| WDR830S      | 0.06013941   | 1.082797419  | 0.27970601  | 0.456324442 | no |
| PSG7         | -0.060127206 | -1.082576896 | 0.279803777 | 0.456449292 | no |
| PHF13        | 0.060110634  | 1.082277435  | 0.279936577 | 0.456580642 | no |
| TEX19        | -0.060110023 | -1.082266397 | 0.279941472 | 0.456580642 | no |
| SYNJ1        | -0.060108523 | -1.082239302 | 0.27995349  | 0.456580642 | no |
| LOC100128531 | -0.060106554 | -1.082203715 | 0.279969275 | 0.456580642 | no |
| CRABP2       | 0.060099465  | 1.082075611  | 0.280026103 | 0.45658726  | no |
| MAGOH        | 0.060098832  | 1.082064185  | 0.280031171 | 0.45658726  | no |
| VENTXP1      | -0.060097272 | -1.082035996 | 0.280043678 | 0.45658726  | no |
| ADH1C        | 0.060095446  | 1.082003002  | 0.280058316 | 0.45658726  | no |
| MIR766       | -0.060091263 | -1.081927412 | 0.280091854 | 0.456607299 | no |
| PATE1        | -0.060077815 | -1.081684403 | 0.280199692 | 0.456724391 | no |
| SIX6         | -0.060077006 | -1.081669775 | 0.280206184 | 0.456724391 | no |
| HMGN2P46     | 0.060061609  | 1.081391568  | 0.280329678 | 0.456891029 | no |
| FLJ11235     | 0.060021069  | 1.080659006  | 0.280655035 | 0.457386621 | no |
| DLST         | -0.0600102   | -1.080462614 | 0.280742304 | 0.457475079 | no |
| CDH23        | 0.060009007  | 1.080441049  | 0.280751888 | 0.457475079 | no |
| LOC100288079 | -0.059990952 | -1.0801148   | 0.280896903 | 0.457676676 | no |
| ZSWIM2       | -0.059967565 | -1.079692203 | 0.281084821 | 0.457948139 | no |
| MAGEB2       | 0.059963223  | 1.079613757  | 0.281119714 | 0.457970267 | no |
| GRB7         | 0.059953395  | 1.079436173  | 0.281198713 | 0.458020828 | no |
| MAK16        | 0.059950628  | 1.079386168  | 0.281220961 | 0.458020828 | no |
| LOC283214    | -0.059949552 | -1.07936672  | 0.281229614 | 0.458020828 | no |
| CCDC92       | -0.059947943 | -1.079337656 | 0.281242546 | 0.458020828 | no |
| CDC14C       | -0.059942487 | -1.079239061 | 0.281286418 | 0.458020828 | no |
| CYP2R1       | 0.059939462  | 1.079184399  | 0.281310742 | 0.458020828 | no |
| SNAR-F       | -0.059938687 | -1.079170395 | 0.281316974 | 0.458020828 | no |
| TANGO6       | -0.059935659 | -1.07911568  | 0.281341325 | 0.458020828 | no |
| OR1L8        | 0.059932527  | 1.079059097  | 0.281366508 | 0.458020828 | no |
| CYP4A11      | -0.059931597 | -1.079042283 | 0.281373992 | 0.458020828 | no |
| MIR202       | -0.059930205 | -1.079017136 | 0.281385184 | 0.458020828 | no |
| MXD4         | -0.059911482 | -1.078678822 | 0.281535795 | 0.458231277 | no |
| LOC100130452 | -0.059901233 | -1.078493625 | 0.281618265 | 0.458330794 | no |
| INTS8        | 0.059891453  | 1.078316912  | 0.281696972 | 0.458424173 | no |
| RBP3         | -0.059882261 | -1.078150813 | 0.281770965 | 0.458509866 | no |
| CEACAM22P    | -0.05987304  | -1.077984202 | 0.281845199 | 0.45859594  | no |

|              |              |              |             |             |    |
|--------------|--------------|--------------|-------------|-------------|----|
| BMS1P5       | -0.059844034 | -1.077460084 | 0.28207881  | 0.458909555 | no |
| HOPX         | 0.059843806  | 1.07745596   | 0.282080649 | 0.458909555 | no |
| NHLH1        | -0.059832426 | -1.077250327 | 0.28217234  | 0.459023977 | no |
| SAMD11       | -0.059829289 | -1.077193659 | 0.282197612 | 0.459030342 | no |
| MRPL2        | -0.059798769 | -1.076642175 | 0.282443633 | 0.459395755 | no |
| ACHE         | 0.059780567  | 1.07631329   | 0.282590421 | 0.459599723 | no |
| LOC643923    | 0.059761512  | 1.075968988  | 0.282744145 | 0.459814939 | no |
| SNAR-G1      | -0.059754487 | -1.075842056 | 0.282800832 | 0.459872328 | no |
| LOC116437    | -0.059746379 | -1.075695544 | 0.282866273 | 0.459921593 | no |
| HIST1H4A     | -0.059745058 | -1.075671682 | 0.282876932 | 0.459921593 | no |
| CLDN5        | -0.059742779 | -1.075630498 | 0.28289533  | 0.459921593 | no |
| HTRA2        | -0.059733509 | -1.075463    | 0.282970162 | 0.459982533 | no |
| HMX2         | -0.059732833 | -1.075450783 | 0.282975621 | 0.459982533 | no |
| KCNC4        | -0.059726205 | -1.075331034 | 0.283029129 | 0.460034716 | no |
| IGFBP1       | 0.059721556  | 1.075247037  | 0.283066667 | 0.460060934 | no |
| EIF2C3       | 0.059709136  | 1.075022607  | 0.283166979 | 0.460175407 | no |
| ANGPTL7      | 0.059706767  | 1.074979814  | 0.283186109 | 0.460175407 | no |
| C21orf91-OT1 | -0.059704882 | -1.074945749 | 0.283201337 | 0.460175407 | no |
| TIMM17A      | 0.059695748  | 1.074780713  | 0.283275124 | 0.460260504 | no |
| CHTOP        | -0.059689056 | -1.074659787 | 0.283329198 | 0.460313561 | no |
| RGS4         | -0.05967401  | -1.074387938 | 0.283450784 | 0.460476287 | no |
| HIST1H4K     | 0.059633422  | 1.07365457   | 0.283778966 | 0.460974584 | no |
| TPR          | -0.059623293 | -1.073471544 | 0.28386091  | 0.461072845 | no |
| SLC06A1      | -0.059596914 | -1.072994934 | 0.284074373 | 0.4613847   | no |
| NPSR1-AS1    | 0.059579777  | 1.072685293  | 0.284213112 | 0.46156     | no |
| RHNO1        | -0.059578277 | -1.072658189 | 0.284225259 | 0.46156     | no |
| C2orf62      | 0.059567061  | 1.072455527  | 0.284316092 | 0.461672621 | no |
| ATP2B1       | -0.0595488   | -1.072125583 | 0.284464017 | 0.461877923 | no |
| SLC11A2      | 0.059544041  | 1.072039601  | 0.284502574 | 0.461879241 | no |
| CRB3         | -0.059543394 | -1.072027919 | 0.284507812 | 0.461879241 | no |
| RFX4         | -0.059532514 | -1.071831326 | 0.284595985 | 0.461975834 | no |
| LRR1Q1       | 0.059530747  | 1.071799404  | 0.284610304 | 0.461975834 | no |
| RABL2B       | -0.059516454 | -1.071541145 | 0.284726166 | 0.462111019 | no |
| FAM195B      | -0.059515167 | -1.071517907 | 0.284736593 | 0.462111019 | no |
| RIPK4        | 0.059509431  | 1.071414253  | 0.284783105 | 0.462151606 | no |
| SNORA14B     | -0.059483008 | -1.070936847 | 0.284997397 | 0.462464441 | no |
| MIR187       | -0.059479922 | -1.070881086 | 0.285022433 | 0.462466933 | no |
| AGER         | -0.059477513 | -1.070837574 | 0.285041971 | 0.462466933 | no |
| DEPDC1       | 0.059461163  | 1.070542151  | 0.285174645 | 0.462647264 | no |
| MPL          | -0.059442079 | -1.070197345 | 0.285329551 | 0.46286363  | no |
| FLJ22763     | 0.059438859  | 1.070139176  | 0.285355689 | 0.462871093 | no |
| PSG6         | -0.059414984 | -1.069707806 | 0.285549576 | 0.463150637 | no |
| MCM6         | 0.059412208  | 1.069657652  | 0.285572124 | 0.463152255 | no |
| NR6A1        | -0.059406673 | -1.06955763  | 0.285617096 | 0.463190236 | no |
| NEDD8-MDP1   | 0.0594008    | 1.069451528  | 0.285664807 | 0.463232654 | no |
| MBTPS2       | -0.05938874  | -1.069233629 | 0.285762806 | 0.46332911  | no |
| SLC35G3      | -0.05938655  | -1.069194054 | 0.285780608 | 0.46332911  | no |
| ARSF         | 0.059385521  | 1.069175471  | 0.285788967 | 0.46332911  | no |
| NF2          | -0.059372429 | -1.068938925 | 0.285895385 | 0.463435625 | no |
| CCDC93       | -0.059372132 | -1.068933569 | 0.285897795 | 0.463435625 | no |
| POLR3C       | 0.059364764  | 1.068800438  | 0.285957701 | 0.463495431 | no |

|              |              |              |             |             |    |
|--------------|--------------|--------------|-------------|-------------|----|
| HNRNPM       | -0.059362289 | -1.068755721 | 0.285977824 | 0.463495431 | no |
| IRAK4        | 0.059354847  | 1.068621267  | 0.286038337 | 0.463558548 | no |
| TMEM42       | -0.059321905 | -1.068026076 | 0.286306314 | 0.463957849 | no |
| DCAF12L1     | -0.059312477 | -1.067855737 | 0.286383038 | 0.464047189 | no |
| WDR96        | 0.059303789  | 1.067698771  | 0.286453751 | 0.464126486 | no |
| LMNB1        | -0.059301158 | -1.067651236 | 0.286475168 | 0.464126486 | no |
| DEFA5        | -0.059287861 | -1.067410998 | 0.286583424 | 0.464266875 | no |
| SNORA70E     | -0.059284182 | -1.067344529 | 0.286613381 | 0.464280408 | no |
| LINC00333    | 0.059270853  | 1.067103702  | 0.286721937 | 0.464421251 | no |
| C2orf201     | -0.059260789 | -1.066921867 | 0.286803921 | 0.464519034 | no |
| OR2T12       | -0.059243209 | -1.066604256 | 0.28694716  | 0.464716007 | no |
| NAA15        | 0.059235844  | 1.066471181  | 0.287007189 | 0.464778201 | no |
| MB           | -0.059228698 | -1.066342076 | 0.287065436 | 0.464837499 | no |
| SYT6         | 0.059219344  | 1.066173072  | 0.287141696 | 0.464925954 | no |
| INO80E       | -0.059214303 | -1.066082006 | 0.287182793 | 0.464948519 | no |
| GNB2L1       | -0.059212328 | -1.066046315 | 0.287198901 | 0.464948519 | no |
| PGCP1        | 0.059177902  | 1.065424337  | 0.287479713 | 0.465368071 | no |
| MOGAT1       | -0.059168669 | -1.065257521 | 0.287555059 | 0.46545498  | no |
| DNAH2        | -0.059164855 | -1.065188617 | 0.287586185 | 0.465470304 | no |
| GOT1L1       | -0.059158856 | -1.065080241 | 0.287635146 | 0.465514491 | no |
| LINC00841    | 0.059147568  | 1.06487629   | 0.287727301 | 0.465628571 | no |
| LOC100134317 | -0.059122257 | -1.064419002 | 0.287933997 | 0.465927982 | no |
| EYA2         | 0.059112714  | 1.064246592  | 0.288011954 | 0.46601904  | no |
| MMP8         | 0.059109122  | 1.064181693  | 0.288041301 | 0.466031439 | no |
| TFDP3        | -0.059075517 | -1.06357456  | 0.288315953 | 0.466429654 | no |
| TBL1X        | -0.059073697 | -1.063541677 | 0.288330834 | 0.466429654 | no |
| HIST2H2AC    | -0.059069528 | -1.063466371 | 0.288364914 | 0.466449473 | no |
| HMGB4        | 0.059066889  | 1.063418689  | 0.288386494 | 0.466449473 | no |
| DPPA2        | 0.059062344  | 1.063336572  | 0.288423662 | 0.466474481 | no |
| AKD1         | -0.059053656 | -1.063179603 | 0.288494717 | 0.466503883 | no |
| PARP3        | -0.059053397 | -1.063174939 | 0.288496829 | 0.466503883 | no |
| ERGIC3       | 0.059052159  | 1.063152557  | 0.288506962 | 0.466503883 | no |
| ERMP1        | -0.059044502 | -1.06301423  | 0.28856959  | 0.466570047 | no |
| RNF167       | 0.059038923  | 1.062913431  | 0.288615233 | 0.46660874  | no |
| RPL13AP3     | -0.059033554 | -1.062816445 | 0.288659155 | 0.466634725 | no |
| STAG3L1      | 0.059031651  | 1.06278205   | 0.288674732 | 0.466634725 | no |
| MTA3         | -0.059023367 | -1.062632384 | 0.288742522 | 0.466709201 | no |
| ANKRD9       | -0.059019389 | -1.062560517 | 0.288775077 | 0.466726719 | no |
| PTPRU        | -0.059007521 | -1.062346109 | 0.288872216 | 0.466848609 | no |
| TFAP2D       | -0.059004376 | -1.062289293 | 0.288897961 | 0.466855108 | no |
| KRTAP5-6     | -0.058989335 | -1.062017562 | 0.289021111 | 0.466993531 | no |
| TSPAN18      | -0.058988607 | -1.062004396 | 0.289027079 | 0.466993531 | no |
| GPX5         | -0.058952951 | -1.06136022  | 0.289319169 | 0.467430331 | no |
| EPRS         | -0.058942495 | -1.061171321 | 0.289404859 | 0.467510072 | no |
| LOC100506241 | -0.058941619 | -1.061155509 | 0.289412033 | 0.467510072 | no |
| PLEKHM2      | 0.05893841   | 1.061097535  | 0.289438336 | 0.46751742  | no |
| FER          | -0.058929903 | -1.060943846 | 0.289508072 | 0.467537633 | no |
| SNORA70F     | 0.058929115  | 1.060929597  | 0.289514538 | 0.467537633 | no |
| SMARCD1      | -0.058928922 | -1.060926123 | 0.289516115 | 0.467537633 | no |
| FAM90A10P    | -0.05891972  | -1.060759865 | 0.289591569 | 0.467615666 | no |
| TCEAL6       | -0.058917722 | -1.060723767 | 0.289607953 | 0.467615666 | no |

|              |              |              |             |             |    |
|--------------|--------------|--------------|-------------|-------------|----|
| ONECUT1      | -0.058901085 | -1.060423208 | 0.289744396 | 0.467800828 | no |
| FBXL21       | -0.058896744 | -1.060344779 | 0.289780007 | 0.467823177 | no |
| THUMPD3      | -0.05889234  | -1.060265222 | 0.289816134 | 0.467846356 | no |
| MST4         | 0.058877918  | 1.06000466   | 0.289934475 | 0.468002238 | no |
| ZNF518A      | -0.058875199 | -1.059955546 | 0.289956785 | 0.468003099 | no |
| MED30        | -0.058855873 | -1.0596064   | 0.290115419 | 0.468223976 | no |
| PITX2        | -0.05884634  | -1.059434174 | 0.29019369  | 0.468315131 | no |
| ABCC6        | 0.058824523  | 1.059040029  | 0.290372872 | 0.468569108 | no |
| TMEM199      | -0.058816246 | -1.058890504 | 0.290440867 | 0.468643642 | no |
| ZCCHC6       | 0.058806691  | 1.058717891  | 0.290519374 | 0.468735125 | no |
| SLFNL1-AS1   | -0.058793222 | -1.058474551 | 0.290630074 | 0.468844206 | no |
| KIAA1751     | -0.058793156 | -1.058473364 | 0.290630614 | 0.468844206 | no |
| RXRA         | 0.058785855  | 1.058341461  | 0.290690631 | 0.468905828 | no |
| KIF15        | -0.058758142 | -1.057840819 | 0.290918503 | 0.469228515 | no |
| RRP15        | -0.058755107 | -1.057785982 | 0.29094347  | 0.469228515 | no |
| LINC00595    | 0.058753562  | 1.057758074  | 0.290956177 | 0.469228515 | no |
| CASR         | -0.058741139 | -1.057533643 | 0.291058377 | 0.469358114 | no |
| RASAL2       | 0.058721554  | 1.057179823  | 0.291219547 | 0.469560383 | no |
| IQSEC1       | 0.058720587  | 1.057162351  | 0.291227507 | 0.469560383 | no |
| KNTC1        | 0.058715054  | 1.057062398  | 0.291273049 | 0.469598582 | no |
| B3GNT6       | -0.058707359 | -1.056923378 | 0.291336399 | 0.469665482 | no |
| ATP50        | -0.058699917 | -1.056788938 | 0.29139767  | 0.469729023 | no |
| ITGBL1       | -0.058687178 | -1.056558803 | 0.291502576 | 0.469862885 | no |
| AKAP14       | 0.058663942  | 1.056139041  | 0.291693987 | 0.470136153 | no |
| LMNA         | 0.058641005  | 1.055724666  | 0.291883025 | 0.470405556 | no |
| FAM57A       | 0.058633946  | 1.055597151  | 0.291941213 | 0.470448987 | no |
| OR7E12P      | -0.058632425 | -1.05556967  | 0.291953755 | 0.470448987 | no |
| ZNF732       | -0.058623474 | -1.055407968 | 0.292027558 | 0.470532632 | no |
| MAGEC3       | -0.058602568 | -1.055030292 | 0.292199983 | 0.470775158 | no |
| APOF         | -0.058593495 | -1.054866403 | 0.292274827 | 0.470860443 | no |
| LOC441025    | -0.058586513 | -1.054740271 | 0.292332437 | 0.470917952 | no |
| RPL3L        | -0.058575658 | -1.054544164 | 0.292422022 | 0.471026959 | no |
| ZNF585A      | 0.058570402  | 1.054449212  | 0.292465405 | 0.471061532 | no |
| FAR2         | 0.058565964  | 1.054369045  | 0.292502036 | 0.471085227 | no |
| RBM14        | -0.058555979 | -1.054188658 | 0.292584472 | 0.471182682 | no |
| SLK          | 0.058544128  | 1.053974576  | 0.292682327 | 0.471304953 | no |
| TRIM73       | -0.058524363 | -1.053617518 | 0.292845584 | 0.471532513 | no |
| ZNF540       | -0.058510328 | -1.053363988 | 0.292961543 | 0.471683887 | no |
| PRHOXNB      | -0.058482742 | -1.052865648 | 0.293189561 | 0.472015647 | no |
| NRADDP       | -0.058457993 | -1.05241855  | 0.293394236 | 0.472275268 | no |
| HSPB2-C11orf | -0.058457927 | -1.052417373 | 0.293394775 | 0.472275268 | no |
| POLM         | 0.058454107  | 1.052348358  | 0.293426378 | 0.472290764 | no |
| C10orf35     | -0.058445145 | -1.052186463 | 0.29350052  | 0.472374722 | no |
| ERI2         | -0.05844084  | -1.052108699 | 0.293536137 | 0.47239667  | no |
| LOC100270746 | -0.058421966 | -1.051767738 | 0.293692339 | 0.472597971 | no |
| RBMXL1       | 0.058420412  | 1.051739666  | 0.293705202 | 0.472597971 | no |
| OCM          | -0.058415547 | -1.051651795 | 0.293745468 | 0.472627376 | no |
| PRMT10       | -0.058409104 | -1.051535402 | 0.29379881  | 0.472651612 | no |
| ZNF273       | -0.058408415 | -1.05152295  | 0.293804517 | 0.472651612 | no |
| LOC100130298 | 0.058398009  | 1.051334965  | 0.293890684 | 0.472722332 | no |
| CETP         | 0.058394133  | 1.051264958  | 0.293922777 | 0.472722332 | no |

|              |              |              |             |             |    |
|--------------|--------------|--------------|-------------|-------------|----|
| GRK7         | -0.058393132 | -1.051246863 | 0.293931073 | 0.472722332 | no |
| GCSAM        | 0.058392481  | 1.051235105  | 0.293936463 | 0.472722332 | no |
| SLC44A1      | -0.05837851  | -1.050982725 | 0.294052185 | 0.472873056 | no |
| LOC100289092 | -0.058371502 | -1.050856127 | 0.294110245 | 0.472931034 | no |
| TECR         | -0.058363379 | -1.05070939  | 0.29417755  | 0.47300387  | no |
| LOC100134868 | -0.058354601 | -1.050550835 | 0.294250288 | 0.47308543  | no |
| MYEOV2       | -0.058328721 | -1.050083327 | 0.294464829 | 0.473394947 | no |
| SNORA70G     | -0.058323578 | -1.049990421 | 0.294507477 | 0.473394997 | no |
| TBX20        | -0.058323405 | -1.049987287 | 0.294508916 | 0.473394997 | no |
| CCDC68       | -0.0583123   | -1.049786694 | 0.29460101  | 0.473507614 | no |
| RPL36AL      | -0.058306006 | -1.049672989 | 0.294653222 | 0.473556117 | no |
| ZNF589       | -0.058302008 | -1.049600769 | 0.294686388 | 0.473574005 | no |
| DNAJC9       | -0.058293942 | -1.049455068 | 0.294753306 | 0.473633149 | no |
| CRP          | -0.058292211 | -1.049423802 | 0.294767667 | 0.473633149 | no |
| TAF8         | 0.058289196  | 1.049369333  | 0.294792688 | 0.473633149 | no |
| LIN37        | -0.058283803 | -1.049271922 | 0.294837437 | 0.473633149 | no |
| C19orf21     | -0.058282905 | -1.049255697 | 0.294844891 | 0.473633149 | no |
| MC4R         | -0.058279551 | -1.049195109 | 0.294872727 | 0.473633149 | no |
| AP1B1P1      | -0.058278981 | -1.049184803 | 0.294877462 | 0.473633149 | no |
| ZNF432       | 0.058273151  | 1.049079489  | 0.294925851 | 0.47367547  | no |
| POC1B        | -0.058265273 | -1.048937186 | 0.294991244 | 0.473745093 | no |
| LOC340094    | 0.058254589  | 1.048744196  | 0.295079945 | 0.473852134 | no |
| IP6K3        | -0.058251211 | -1.04868317  | 0.295107997 | 0.473861773 | no |
| TMEM185A     | 0.058237485  | 1.048435216  | 0.295221995 | 0.474009405 | no |
| EGFL6        | 0.058209114  | 1.047922722  | 0.295457709 | 0.474352429 | no |
| SLC16A12     | 0.05819719   | 1.047707342  | 0.295556807 | 0.474386678 | no |
| HCG22        | 0.058194894  | 1.047665866  | 0.295575894 | 0.474386678 | no |
| FBXW10       | -0.058193274 | -1.047636601 | 0.295589361 | 0.474386678 | no |
| TAF1C        | -0.058192563 | -1.04762375  | 0.295595275 | 0.474386678 | no |
| AKR1C2       | 0.058191793  | 1.047609845  | 0.295601674 | 0.474386678 | no |
| LOC100507547 | -0.058190613 | -1.04758853  | 0.295611483 | 0.474386678 | no |
| DPM1         | 0.058156275  | 1.046968252  | 0.29589704  | 0.474797921 | no |
| C17orf99     | -0.058154485 | -1.046935913 | 0.295911933 | 0.474797921 | no |
| PPP1R14D     | -0.058149844 | -1.046852084 | 0.295950541 | 0.474813479 | no |
| GDPD4        | 0.058148008  | 1.046818918  | 0.295965816 | 0.474813479 | no |
| NLRX1        | 0.058144396  | 1.04675367   | 0.29599587  | 0.474826248 | no |
| LOC389043    | -0.058141325 | -1.046698197 | 0.296021423 | 0.474831796 | no |
| TAS2R30      | -0.05812601  | -1.046421559 | 0.296148874 | 0.47500078  | no |
| PIP5K1C      | -0.058118889 | -1.046292921 | 0.296208153 | 0.475060403 | no |
| LOC155060    | -0.058106087 | -1.046061675 | 0.296314734 | 0.475185605 | no |
| CHRNA1       | -0.058104201 | -1.046027603 | 0.296330439 | 0.475185605 | no |
| MYO1H        | -0.058099534 | -1.0459433   | 0.296369302 | 0.4751897   | no |
| RP9          | -0.058098584 | -1.045926136 | 0.296377215 | 0.4751897   | no |
| C9orf123     | -0.05809755  | -1.045766664 | 0.296450741 | 0.475272128 | no |
| EPS8L3       | -0.058081455 | -1.045616722 | 0.296519885 | 0.475341661 | no |
| SLC22A12     | 0.058079238  | 1.045576686  | 0.296538348 | 0.475341661 | no |
| PMCHL2       | -0.058075398 | -1.045507317 | 0.296570342 | 0.475342544 | no |
| NEURL2       | 0.058073744  | 1.045477434  | 0.296584125 | 0.475342544 | no |
| NR5A1        | -0.058070803 | -1.045424319 | 0.296608624 | 0.475342544 | no |
| C3orf55      | 0.058068553  | 1.045383675  | 0.296627372 | 0.475342544 | no |
| ZNF547       | -0.058051629 | -1.045077965 | 0.296768413 | 0.475533102 | no |



|              |              |              |             |             |    |
|--------------|--------------|--------------|-------------|-------------|----|
| FAM24B-CUZD1 | -0.058048777 | -1.045026449 | 0.296792185 | 0.475535737 | no |
| LOC100506469 | -0.058043965 | -1.044939523 | 0.296832299 | 0.475564554 | no |
| STK32A       | 0.058035049  | 1.044778479  | 0.296906626 | 0.475648178 | no |
| GM140        | -0.058018427 | -1.044478229 | 0.297045236 | 0.475834762 | no |
| SMURF2       | -0.058000326 | -1.044151269 | 0.297196225 | 0.476041147 | no |
| LPCAT1       | 0.057994907  | 1.044053372  | 0.297241444 | 0.476078094 | no |
| IFNW1        | -0.057990006 | -1.043964853 | 0.297282334 | 0.476108104 | no |
| SPOPL        | 0.057965512  | 1.043522413  | 0.297486774 | 0.476400019 | no |
| DCAF6        | 0.057945937  | 1.043168834  | 0.297650221 | 0.476603464 | no |
| RPL23AP32    | -0.057941752 | -1.043093223 | 0.297685181 | 0.476603464 | no |
| SLC15A5      | -0.057941601 | -1.043090501 | 0.29768644  | 0.476603464 | no |
| ROB03        | -0.057939675 | -1.043055721 | 0.297702522 | 0.476603464 | no |
| ZNF276       | -0.057936106 | -1.042991239 | 0.29773234  | 0.476615696 | no |
| CCNC         | -0.057926712 | -1.042821569 | 0.297810808 | 0.476688979 | no |
| ZNF214       | 0.057925315  | 1.042796333  | 0.29782248  | 0.476688979 | no |
| FGF22        | -0.057915455 | -1.042618233 | 0.297904864 | 0.476743386 | no |
| COASY        | 0.05791397   | 1.042591413  | 0.297917272 | 0.476743386 | no |
| PHACTR4      | 0.05791195   | 1.042554924  | 0.297934153 | 0.476743386 | no |
| HGD          | 0.057910628  | 1.042531035  | 0.297945206 | 0.476743386 | no |
| ZFYVE27      | -0.057892328 | -1.042200494 | 0.298098159 | 0.476952616 | no |
| C12orf74     | -0.057880761 | -1.041991544 | 0.298194875 | 0.477071843 | no |
| PCDHGA4      | -0.057876012 | -1.041905777 | 0.29823458  | 0.477095433 | no |
| ZNF211       | -0.057871569 | -1.041825519 | 0.298271738 | 0.477095433 | no |
| CFC1B        | -0.057871033 | -1.041815839 | 0.298276219 | 0.477095433 | no |
| KIFC1        | -0.057854199 | -1.041511771 | 0.298417026 | 0.477285132 | no |
| FAM71E1      | -0.057827266 | -1.041025282 | 0.2986424   | 0.477610048 | no |
| TTR          | 0.057818783  | 1.040872057  | 0.298713408 | 0.477688061 | no |
| SLC23A3      | 0.057763005  | 1.039864553  | 0.299180588 | 0.478399555 | no |
| AQP7P1       | -0.057755949 | -1.039737118 | 0.299239715 | 0.4784585   | no |
| COX7A2L      | -0.057739267 | -1.0394358   | 0.299379549 | 0.478646473 | no |
| RNASE8       | -0.0577342   | -1.039344269 | 0.299422035 | 0.478678789 | no |
| RNF207       | -0.057723574 | -1.039152346 | 0.299511134 | 0.478785613 | no |
| HSPE1        | -0.057705421 | -1.038824454 | 0.299663396 | 0.478993384 | no |
| KLF8         | 0.057701571  | 1.038754909  | 0.299695697 | 0.479009388 | no |
| ZFP57        | -0.057692087 | -1.038583614 | 0.299775267 | 0.479100934 | no |
| FLRT2        | -0.057682375 | -1.038408186 | 0.299856771 | 0.479195558 | no |
| DENR         | 0.057678023  | 1.038329579  | 0.299893297 | 0.479218295 | no |
| NOM1         | 0.05765959   | 1.03799664   | 0.300048035 | 0.479409649 | no |
| C15orf55     | -0.057658444 | -1.037975934 | 0.300057661 | 0.479409649 | no |
| SCCPDH       | -0.057647003 | -1.037769292 | 0.300153729 | 0.47952749  | no |
| ADAMTS15     | 0.057618347  | 1.037251712  | 0.300394445 | 0.479876386 | no |
| POTEM        | -0.05761454  | -1.037182932 | 0.300426443 | 0.479884025 | no |
| MIR1289-2    | -0.057612464 | -1.037145439 | 0.300443886 | 0.479884025 | no |
| STXBP5       | -0.057608082 | -1.037066293 | 0.300480711 | 0.479907176 | no |
| CBWD2        | 0.057586442  | 1.036675438  | 0.30066261  | 0.480162008 | no |
| PLEKHD1      | -0.057581097 | -1.036578896 | 0.300707551 | 0.480198096 | no |
| CDC42SE2     | -0.057574252 | -1.036455268 | 0.300765107 | 0.480198962 | no |
| STX19        | -0.057571845 | -1.036411785 | 0.300785352 | 0.480198962 | no |
| BAGE5        | 0.057571513  | 1.036405785  | 0.300788146 | 0.480198962 | no |
| GJA8         | -0.05756965  | -1.036372133 | 0.300803815 | 0.480198962 | no |
| EFCAB7       | -0.057564637 | -1.036281594 | 0.300845974 | 0.480198962 | no |

|            |              |              |             |             |    |
|------------|--------------|--------------|-------------|-------------|----|
| FUT2       | -0.057564472 | -1.036278616 | 0.300847361 | 0.480198962 | no |
| PEPD       | -0.057562434 | -1.036241808 | 0.300864502 | 0.480198962 | no |
| TRIM62     | -0.057549202 | -1.03600281  | 0.300975815 | 0.480340951 | no |
| ESPL1      | -0.057528413 | -1.035627316 | 0.301150757 | 0.480584459 | no |
| ATP1B2     | 0.057517756  | 1.035434833  | 0.30124046  | 0.480691916 | no |
| DPH5       | -0.057502996 | -1.035168251 | 0.301364726 | 0.480854505 | no |
| SPATA5     | -0.05748961  | -1.034926472 | 0.30147746  | 0.48099867  | no |
| SNAP25-AS1 | -0.0574838   | -1.034821541 | 0.301526394 | 0.481013326 | no |
| APIP       | 0.057483205  | 1.034810787  | 0.30153141  | 0.481013326 | no |
| LOC391322  | -0.057475416 | -1.0346701   | 0.301597028 | 0.481052866 | no |
| CHEK2P2    | -0.057474949 | -1.034661662 | 0.301600964 | 0.481052866 | no |
| ATP6VOA4   | -0.057465095 | -1.0344837   | 0.301683983 | 0.481149571 | no |
| USP21      | -0.057452115 | -1.034249261 | 0.301793371 | 0.481288316 | no |
| CA3        | 0.057446041  | 1.034139546  | 0.301844573 | 0.481314344 | no |
| RAD1       | 0.05744296   | 1.03408389   | 0.301870548 | 0.481314344 | no |
| CCDC147    | 0.057442208  | 1.034070324  | 0.30187688  | 0.481314344 | no |
| AMBRA1     | -0.057439353 | -1.03401875  | 0.301900953 | 0.481317016 | no |
| TMEM88     | -0.057425556 | -1.033769564 | 0.302017279 | 0.481466756 | no |
| PLGLB1     | -0.057420517 | -1.033678552 | 0.302059772 | 0.481482548 | no |
| NOP14      | 0.057417704  | 1.033627731  | 0.302083503 | 0.481482548 | no |
| PAX7       | -0.057416412 | -1.033604401 | 0.302094397 | 0.481482548 | no |
| RCL1       | 0.05739259   | 1.033174138  | 0.302295359 | 0.481734495 | no |
| RNF157-AS1 | -0.057392359 | -1.033169971 | 0.302297306 | 0.481734495 | no |
| DPYSL5     | -0.057387431 | -1.033080967 | 0.302338888 | 0.481746626 | no |
| RRIAD1     | -0.057386144 | -1.033057717 | 0.30234975  | 0.481746626 | no |
| FAM9A      | -0.057381387 | -1.03297181  | 0.302389891 | 0.48174745  | no |
| KLHL20     | -0.05738077  | -1.03296066  | 0.3023951   | 0.48174745  | no |
| WDR72      | 0.057368282  | 1.032735114  | 0.302500505 | 0.481879649 | no |
| PRODH2     | -0.057360384 | -1.032592454 | 0.302567187 | 0.481950149 | no |
| NKX2-4     | -0.057351749 | -1.032436497 | 0.302640095 | 0.482030555 | no |
| INE1       | -0.057334393 | -1.032123034 | 0.302786671 | 0.482228275 | no |
| ELMSAN1    | 0.057326603  | 1.031982328  | 0.302852481 | 0.482265404 | no |
| ZNF516     | -0.05732632  | -1.031977232 | 0.302854864 | 0.482265404 | no |
| ARHGEF11   | -0.057299017 | -1.031484099 | 0.303085585 | 0.48258405  | no |
| RXFP4      | -0.057297238 | -1.031451972 | 0.303100621 | 0.48258405  | no |
| LOC644172  | -0.057294383 | -1.031400406 | 0.303124754 | 0.48258405  | no |
| DLX6       | -0.057292013 | -1.0313576   | 0.303144789 | 0.48258405  | no |
| RFPL3      | -0.057279371 | -1.031129268 | 0.303251672 | 0.482718442 | no |
| CNTROB     | -0.057260911 | -1.030795863 | 0.303407785 | 0.482847655 | no |
| LUC7L2     | -0.057260763 | -1.030793197 | 0.303409034 | 0.482847655 | no |
| HES1       | 0.057258085  | 1.030744819  | 0.303431691 | 0.482847655 | no |
| ZNF618     | 0.057254167  | 1.030674063  | 0.30346483  | 0.482847655 | no |
| TMED6      | 0.057254116  | 1.030673147  | 0.303465259 | 0.482847655 | no |
| MASTL      | 0.057253833  | 1.030668041  | 0.303467651 | 0.482847655 | no |
| AMBN       | -0.057233044 | -1.030292559 | 0.303643553 | 0.483091768 | no |
| FLJ33581   | -0.057206404 | -1.029811417 | 0.303869054 | 0.483414749 | no |
| SPATA31D3  | 0.057186025  | 1.029443356  | 0.304041632 | 0.483632819 | no |
| HELT       | -0.057184902 | -1.029423084 | 0.304051138 | 0.483632819 | no |
| BSN-AS2    | -0.057156862 | -1.028916669 | 0.3042887   | 0.48397487  | no |
| SBF1P1     | -0.057136618 | -1.028551048 | 0.304460291 | 0.484211953 | no |
| CCDC166    | -0.05713052  | -1.028440911 | 0.304511993 | 0.484258342 | no |

|              |              |              |             |             |    |
|--------------|--------------|--------------|-------------|-------------|----|
| LOC146880    | 0.057122848  | 1.028302346  | 0.304577047 | 0.484325958 | no |
| MTNR1A       | -0.057111692 | -1.028100867 | 0.304671656 | 0.484440556 | no |
| SPATA21      | -0.057106751 | -1.02801162  | 0.30471357  | 0.484451778 | no |
| LOC650226    | -0.057105545 | -1.027989844 | 0.304723797 | 0.484451778 | no |
| RAI2         | -0.057094065 | -1.027782519 | 0.304821183 | 0.484570756 | no |
| SSX6         | -0.057090206 | -1.027712822 | 0.304853926 | 0.484586962 | no |
| CENPB        | 0.057087277  | 1.027659925  | 0.304878778 | 0.484590624 | no |
| LOC100132247 | -0.057071099 | -1.027367743 | 0.305016075 | 0.484741028 | no |
| OR4N2        | -0.057070812 | -1.027362551 | 0.305018516 | 0.484741028 | no |
| OR5R1        | 0.057057296  | 1.027118442  | 0.305133255 | 0.484887517 | no |
| PLCL2        | -0.057044993 | -1.026896248 | 0.305237719 | 0.485017658 | no |
| TCP10L2      | -0.057039806 | -1.026802569 | 0.305281769 | 0.48505179  | no |
| GUSBP10      | -0.057029659 | -1.026619312 | 0.305367953 | 0.485152856 | no |
| RXFP3        | -0.057014901 | -1.026352785 | 0.305493328 | 0.485292109 | no |
| CNIH2        | -0.057014026 | -1.026336976 | 0.305500765 | 0.485292109 | no |
| LTB4R2       | 0.057003903  | 1.026154161  | 0.305586783 | 0.485357306 | no |
| NDOR1        | -0.057002977 | -1.026137436 | 0.305594653 | 0.485357306 | no |
| DEFA6        | -0.057001223 | -1.026105756 | 0.30560956  | 0.485357306 | no |
| ZNF496       | -0.056995217 | -1.025997296 | 0.305660603 | 0.485402499 | no |
| SLC25A5      | -0.056948311 | -1.025150166 | 0.306059465 | 0.485999997 | no |
| LIG4         | -0.056941596 | -1.025028892 | 0.306116594 | 0.486054801 | no |
| COL28A1      | -0.056928658 | -1.024795236 | 0.306226683 | 0.48619368  | no |
| NT5C3        | -0.056905638 | -1.024379486 | 0.306422633 | 0.486404008 | no |
| INS-IGF2     | -0.056905564 | -1.02437815  | 0.306423263 | 0.486404008 | no |
| MIA2         | -0.056905118 | -1.024370104 | 0.306427056 | 0.486404008 | no |
| UBP1         | 0.056889664  | 1.024091003  | 0.306558649 | 0.486576952 | no |
| ISL1         | -0.056875324 | -1.023832035 | 0.306680783 | 0.486734857 | no |
| CTBP1-AS1    | -0.056836197 | -1.023125416 | 0.307014202 | 0.487201965 | no |
| AP5M1        | -0.056835466 | -1.023112207 | 0.307020437 | 0.487201965 | no |
| C6orf7       | -0.056826566 | -1.02295148  | 0.307096311 | 0.487286387 | no |
| APOOL        | -0.056814099 | -1.022726321 | 0.307202622 | 0.487370852 | no |
| ZFP112       | -0.056813903 | -1.022722785 | 0.307204292 | 0.487370852 | no |
| NUDT8        | -0.056812345 | -1.022694654 | 0.307217576 | 0.487370852 | no |
| HLTF         | -0.056804921 | -1.02256058  | 0.307280894 | 0.487435319 | no |
| PLA1A        | -0.056799695 | -1.022466204 | 0.307325469 | 0.487470047 | no |
| TG           | -0.056781042 | -1.022129333 | 0.307484615 | 0.487686484 | no |
| RAB11FIP5    | 0.056769393  | 1.02191896   | 0.307584027 | 0.487808157 | no |
| NBPF16       | -0.056757114 | -1.021697205 | 0.307688842 | 0.487933703 | no |
| ABCC2        | -0.0567548   | -1.021655412 | 0.307708598 | 0.487933703 | no |
| MAP3K13      | -0.056744572 | -1.021470698 | 0.307795926 | 0.488034203 | no |
| SNTA1        | -0.056742057 | -1.021425295 | 0.307817395 | 0.488034203 | no |
| TAS2R14      | -0.056733526 | -1.021271225 | 0.307890251 | 0.488113706 | no |
| PCDHGB6      | -0.056717139 | -1.020975293 | 0.308030224 | 0.488293722 | no |
| RGPD4        | 0.056713522  | 1.020909965  | 0.308061129 | 0.488293722 | no |
| LCE2C        | -0.056711145 | -1.020867045 | 0.308081434 | 0.488293722 | no |
| WDFY2        | 0.056708211  | 1.02081406   | 0.308106503 | 0.488293722 | no |
| AMT          | 0.056706935  | 1.020791016  | 0.308117406 | 0.488293722 | no |
| CNGA4        | -0.056685276 | -1.020399862 | 0.308302517 | 0.488526171 | no |
| DEFA3        | 0.056684454  | 1.020385012  | 0.308309546 | 0.488526171 | no |
| EIF2C4       | -0.056680522 | -1.020314015 | 0.308343154 | 0.488543403 | no |
| ZMYM4        | 0.056659131  | 1.019927714  | 0.308526057 | 0.488797161 | no |

|              |              |              |             |             |    |
|--------------|--------------|--------------|-------------|-------------|----|
| LOC643770    | -0.056648595 | -1.019737442 | 0.308616172 | 0.488903888 | no |
| CLYBL        | 0.056644885  | 1.019670444  | 0.308647907 | 0.488918123 | no |
| COX17        | 0.056640636  | 1.019593706  | 0.308684259 | 0.488939667 | no |
| SLC15A1      | -0.056625085 | -1.019312873 | 0.308817316 | 0.489114374 | no |
| LYZL4        | -0.056611581 | -1.01906901  | 0.308932888 | 0.489251326 | no |
| PTH1R        | 0.056609662  | 1.019034351  | 0.308949316 | 0.489251326 | no |
| RIC8A        | 0.056593643  | 1.018745055  | 0.309086462 | 0.489432446 | no |
| SERGEF       | 0.056586658  | 1.018618927  | 0.309146268 | 0.489491081 | no |
| OR1D5        | -0.056579447 | -1.018488699 | 0.309208026 | 0.489552798 | no |
| FAM3C        | -0.05655182  | -1.017989786 | 0.309444701 | 0.489748656 | no |
| FKBP1A-SDCBF | -0.056550027 | -1.017957403 | 0.309460067 | 0.489748656 | no |
| SEC14L2      | -0.056547298 | -1.017908117 | 0.309483454 | 0.489748656 | no |
| TRIM63       | 0.05654711   | 1.017904724  | 0.309485065 | 0.489748656 | no |
| IFI27L2      | -0.056546646 | -1.017896352 | 0.309489038 | 0.489748656 | no |
| NDUFB7       | -0.056541813 | -1.017809068 | 0.30953046  | 0.489748656 | no |
| SNRPC        | 0.056541728  | 1.017807545  | 0.309531182 | 0.489748656 | no |
| UBLCP1       | 0.056541351  | 1.017800722  | 0.309534421 | 0.489748656 | no |
| UNC45A       | 0.05654107   | 1.017795648  | 0.309536829 | 0.489748656 | no |
| APITD1-CORT  | -0.056525604 | -1.017516354 | 0.3096694   | 0.489916345 | no |
| NR1H4        | -0.056523387 | -1.017476317 | 0.309688407 | 0.489916345 | no |
| SS18         | 0.056517223  | 1.017365001  | 0.309741257 | 0.489944911 | no |
| HIST1H2BE    | -0.05651342  | -1.017296336 | 0.30977386  | 0.489944911 | no |
| MRGPRX3      | -0.056513304 | -1.017294238 | 0.309774857 | 0.489944911 | no |
| KIAA0753     | -0.056509206 | -1.017220234 | 0.309809998 | 0.489964432 | no |
| TRIM53AP     | -0.056486972 | -1.016818721 | 0.310000705 | 0.49022996  | no |
| XKR3         | 0.056473454  | 1.016574603  | 0.310116692 | 0.490377296 | no |
| LOC646736    | -0.05646985  | -1.016509516 | 0.310147621 | 0.490390121 | no |
| CHRNA10      | -0.056465737 | -1.016435244 | 0.310182918 | 0.49040985  | no |
| ARMS2        | -0.056456808 | -1.016274006 | 0.310259553 | 0.490450107 | no |
| CSH2         | -0.05645586  | -1.016256882 | 0.310267693 | 0.490450107 | no |
| DYNLRB2      | 0.056454794  | 1.01623763   | 0.310276844 | 0.490450107 | no |
| HCG25        | -0.056450686 | -1.016163444 | 0.310312109 | 0.490469776 | no |
| PPP2R5D      | -0.056407498 | -1.015383544 | 0.310683009 | 0.491019896 | no |
| RELL2        | -0.056391169 | -1.015088664 | 0.310823322 | 0.491205531 | no |
| SH3BP5L      | -0.056363985 | -1.01459777  | 0.311056998 | 0.491538673 | no |
| C15orf41     | 0.056351854  | 1.014378701  | 0.311161318 | 0.491627473 | no |
| KCNAB1-AS2   | 0.056351747  | 1.014376777  | 0.311162234 | 0.491627473 | no |
| TINCR        | -0.056349469 | -1.014335649 | 0.311181821 | 0.491627473 | no |
| CSAG4        | 0.056345642  | 1.01426653   | 0.311214742 | 0.491643341 | no |
| TBC1D9       | 0.056334969  | 1.014073799  | 0.311306548 | 0.491717298 | no |
| EML2         | -0.05633488  | -1.014072185 | 0.311307317 | 0.491717298 | no |
| PPP6C        | 0.056331155  | 1.014004928  | 0.311339359 | 0.491731768 | no |
| TRIM42       | -0.056325198 | -1.013897358 | 0.311390612 | 0.491776575 | no |
| KRTAP4-6     | -0.056313887 | -1.013693091 | 0.31148795  | 0.491894154 | no |
| DFFA         | 0.056299493  | 1.013433167  | 0.311611841 | 0.492053642 | no |
| ZFAND2B      | -0.05629382  | -1.013330727 | 0.311660677 | 0.492067469 | no |
| HSF5         | -0.056291292 | -1.013285079 | 0.31168244  | 0.492067469 | no |
| CD320        | 0.05628927   | 1.013248564  | 0.31169985  | 0.492067469 | no |
| UNC13B       | 0.056287838  | 1.013222697  | 0.311712183 | 0.492067469 | no |
| DCAF13P3     | 0.056280514  | 1.013090445  | 0.311775246 | 0.492130379 | no |
| NEK3         | -0.056277891 | -1.01304308  | 0.311797833 | 0.492130379 | no |

|              |              |              |             |             |    |
|--------------|--------------|--------------|-------------|-------------|----|
| LOC84931     | 0.056246577  | 1.012477612  | 0.312067577 | 0.49251996  | no |
| OTUD3        | -0.056227311 | -1.012129725 | 0.312233606 | 0.49271538  | no |
| ITIH4        | 0.056226654  | 1.012117846  | 0.312239276 | 0.49271538  | no |
| GRK1         | -0.056224229 | -1.012074059 | 0.312260178 | 0.49271538  | no |
| ZNF225       | -0.056221041 | -1.012016493 | 0.312287658 | 0.492722565 | no |
| LOC339807    | 0.056208453  | 1.01178918   | 0.312396187 | 0.492857617 | no |
| ITIH3        | 0.056188     | 1.01141985   | 0.312572574 | 0.493099699 | no |
| MYO19        | 0.056168512  | 1.011067936  | 0.312740705 | 0.493328721 | no |
| GAGE12J      | -0.056165441 | -1.011012485 | 0.312767203 | 0.493334308 | no |
| CDK4         | -0.056146017 | -1.010661747 | 0.31293484  | 0.493562502 | no |
| ZNF80        | 0.056131485  | 1.010399323  | 0.313060307 | 0.493711894 | no |
| KAZN         | -0.056129725 | -1.010367538 | 0.313075506 | 0.493711894 | no |
| NLRP7        | 0.056124306  | 1.010269686  | 0.313122299 | 0.493749456 | no |
| LRRC8D       | 0.05611268   | 1.010059759  | 0.313222704 | 0.493838224 | no |
| UNC50        | 0.056112284  | 1.010052613  | 0.313226122 | 0.493838224 | no |
| TNNC2        | -0.056109806 | -1.010007858 | 0.31324753  | 0.493838224 | no |
| NAPSA        | 0.056094867  | 1.009738099  | 0.313376589 | 0.494005448 | no |
| KAT7         | -0.056090164 | -1.009653169 | 0.313417229 | 0.494033275 | no |
| GOLGA1       | -0.056080453 | -1.009477828 | 0.313501142 | 0.494123019 | no |
| CDRT15P1     | 0.056078254  | 1.00943812   | 0.313520147 | 0.494123019 | no |
| TMED11P      | -0.056072049 | -1.009326061 | 0.313573785 | 0.494171315 | no |
| CA6          | 0.056066799  | 1.009231262  | 0.313619167 | 0.494206593 | no |
| HNRNPH1      | -0.056062947 | -1.009161707 | 0.313652466 | 0.494222828 | no |
| BPI          | 0.056051605  | 1.008956904  | 0.313750529 | 0.494341101 | no |
| RNF111       | 0.056041078  | 1.008766826  | 0.31384156  | 0.49441825  | no |
| LOC100132781 | -0.056040622 | -1.008758586 | 0.313845506 | 0.49441825  | no |
| MIR181D      | -0.056011346 | -1.008229947 | 0.314098771 | 0.494780964 | no |
| FCAR         | -0.0559906   | -1.007855323 | 0.314278331 | 0.49502753  | no |
| MYBPC1       | 0.055984395  | 1.007743284  | 0.314332046 | 0.495075852 | no |
| FLJ23867     | -0.055980766 | -1.007677759 | 0.314363463 | 0.49508905  | no |
| CREBZF       | -0.055922216 | -1.006620525 | 0.314870659 | 0.495851494 | no |
| GTF3C6       | -0.055913738 | -1.00646744  | 0.314944145 | 0.495930878 | no |
| KCNJ14       | -0.055903022 | -1.006273942 | 0.315037046 | 0.496040821 | no |
| ZNF175       | -0.055891134 | -1.00605929  | 0.315140125 | 0.496166771 | no |
| CYP3A7-CYP3A | -0.055878767 | -1.005835968 | 0.315247391 | 0.496299295 | no |
| OR2T8        | -0.055875609 | -1.005778958 | 0.315274778 | 0.496306054 | no |
| ACTRT3       | 0.055867705  | 1.005636226  | 0.315343351 | 0.496377643 | no |
| PLK4         | 0.055858338  | 1.005467096  | 0.31542462  | 0.496469204 | no |
| NOP16        | 0.055845812  | 1.005240912  | 0.315533325 | 0.496603932 | no |
| C1orf65      | -0.055813657 | -1.004660316 | 0.315812477 | 0.497006879 | no |
| RNF26        | 0.055806519  | 1.004531419  | 0.315874473 | 0.497068045 | no |
| NUAK1        | -0.055784472 | -1.004133332 | 0.316065992 | 0.49733301  | no |
| TRIM72       | -0.055773812 | -1.003940858 | 0.316158619 | 0.497442337 | no |
| NR1D1        | -0.055763138 | -1.003748125 | 0.316251388 | 0.497551873 | no |
| HOOK2        | -0.055743237 | -1.003388771 | 0.316424406 | 0.497787637 | no |
| LOC100505545 | -0.055736754 | -1.003271713 | 0.31648078  | 0.497831925 | no |
| LOC100129726 | -0.055732351 | -1.003192215 | 0.316519068 | 0.497831925 | no |
| ERC1         | -0.055732008 | -1.00318602  | 0.316522052 | 0.497831925 | no |
| EOMES        | -0.055729119 | -1.003133857 | 0.316547177 | 0.497835008 | no |
| HPCAL4       | -0.055714888 | -1.0028769   | 0.316670964 | 0.497993245 | no |
| LINC00163    | 0.055708989  | 1.002770386  | 0.316722285 | 0.498020114 | no |

|              |              |              |             |             |    |
|--------------|--------------|--------------|-------------|-------------|----|
| INTS7        | -0.055707597 | -1.002745252 | 0.316734397 | 0.498020114 | no |
| MYO1A        | -0.055696425 | -1.002543531 | 0.316831609 | 0.498062023 | no |
| NUS1         | 0.055695734  | 1.002531057  | 0.316837621 | 0.498062023 | no |
| FOXB2        | -0.055695617 | -1.002528937 | 0.316838643 | 0.498062023 | no |
| MAPK7        | -0.055693881 | -1.00249759  | 0.316853752 | 0.498062023 | no |
| POU4F3       | -0.055679051 | -1.002229822 | 0.31698283  | 0.498228479 | no |
| SNX13        | 0.055672919  | 1.002119107  | 0.31703621  | 0.498275939 | no |
| SULT1C3      | -0.055664325 | -1.001963926 | 0.317111039 | 0.498300718 | no |
| MOG          | 0.055663655  | 1.001951833  | 0.317116871 | 0.498300718 | no |
| TDRD9        | -0.055663119 | -1.001942161 | 0.317121535 | 0.498300718 | no |
| LOC349160    | -0.055652343 | -1.001747573 | 0.317215385 | 0.498411745 | no |
| RPL29        | -0.055645845 | -1.001630259 | 0.317271975 | 0.498430283 | no |
| FAM228B      | -0.055645662 | -1.001626954 | 0.317273569 | 0.498430283 | no |
| KRT27        | -0.055629155 | -1.001328892 | 0.317417378 | 0.498619755 | no |
| PLP1         | -0.055622928 | -1.001216461 | 0.317471635 | 0.498668267 | no |
| ZNF134       | 0.055617728  | 1.001122566  | 0.317516951 | 0.498668267 | no |
| C1QTNF9B     | -0.055617622 | -1.00112066  | 0.317517871 | 0.498668267 | no |
| BAAT         | -0.055605284 | -1.000897891 | 0.317625403 | 0.498775504 | no |
| CELA3B       | -0.055604462 | -1.000883047 | 0.317632569 | 0.498775504 | no |
| LOC100505876 | 0.055591896  | 1.000656161  | 0.317742115 | 0.498911068 | no |
| AURKC        | 0.055574288  | 1.00033822   | 0.317895665 | 0.499115703 | no |
| MT1IP        | 0.055570284  | 1.000265924  | 0.317930587 | 0.499134068 | no |
| SLC2A1-AS1   | 0.055550927  | 0.999916431  | 0.318099445 | 0.499362686 | no |
| RIMBP3B      | 0.055544077  | 0.999792746  | 0.318159217 | 0.499420038 | no |
| CCDC146      | 0.055536474  | 0.999655473  | 0.318225565 | 0.499487702 | no |
| SMTNL2       | 0.05552931   | 0.999526112  | 0.318288097 | 0.499549368 | no |
| OR6W1P       | -0.05552144  | -0.999384024 | 0.31835679  | 0.499589206 | no |
| C17orf58     | 0.055521076  | 0.999377442  | 0.318359973 | 0.499589206 | no |
| ARMC7        | 0.055506937  | 0.999122153  | 0.318483419 | 0.499746434 | no |
| GRPEL1       | -0.055478821 | -0.998614502 | 0.31872899  | 0.500095256 | no |
| DGUOK        | -0.055467856 | -0.998416527 | 0.318824793 | 0.500209054 | no |
| C1orf86      | 0.055464851  | 0.998362281  | 0.318851046 | 0.500213725 | no |
| GDF11        | -0.055448045 | -0.998058843 | 0.318997927 | 0.500407625 | no |
| HTR3A        | -0.055429295 | -0.997720291 | 0.319161859 | 0.50062824  | no |
| PLEKHA8      | -0.055424604 | -0.997635599 | 0.319202877 | 0.500656037 | no |
| CD22         | -0.055421729 | -0.997583686 | 0.31922802  | 0.500656707 | no |
| SERAC1       | 0.05541894   | 0.997533341  | 0.319252406 | 0.500656707 | no |
| AAAS         | 0.055416564  | 0.99749043   | 0.319273192 | 0.500656707 | no |
| LINC00605    | 0.055407501  | 0.997326798  | 0.319352463 | 0.500702601 | no |
| UCHL5        | -0.055406648 | -0.9973114   | 0.319359923 | 0.500702601 | no |
| C13orf45     | -0.055405227 | -0.997285744 | 0.319372353 | 0.500702601 | no |
| DNAJC15      | 0.055395099  | 0.997102884  | 0.319460958 | 0.500804978 | no |
| BEND2        | -0.055385676 | -0.996932737 | 0.319543417 | 0.500897708 | no |
| LHX4         | -0.055367957 | -0.996612828 | 0.319698494 | 0.501104247 | no |
| FUT11        | 0.055350158  | 0.996291457  | 0.319854329 | 0.501248012 | no |
| C19orf69     | 0.055348311  | 0.996258112  | 0.319870501 | 0.501248012 | no |
| TRPV1        | -0.055347376 | -0.99624123  | 0.319878689 | 0.501248012 | no |
| CCDC97       | 0.055346825  | 0.996231292  | 0.319883509 | 0.501248012 | no |
| SLC3A2       | -0.055327525 | -0.995882813 | 0.320052555 | 0.501476339 | no |
| SZRD1        | 0.055317042  | 0.995693557  | 0.320144388 | 0.501544566 | no |
| UGT1A5       | -0.055315208 | -0.995660434 | 0.320160462 | 0.501544566 | no |

|              |              |              |             |             |    |
|--------------|--------------|--------------|-------------|-------------|----|
| AGTRAP       | 0.055314563  | 0.995648793  | 0.320166111 | 0.501544566 | no |
| GPR6         | -0.055309641 | -0.995559926 | 0.32020924  | 0.501575566 | no |
| LYRM2        | -0.055298299 | -0.99535514  | 0.320308641 | 0.501694701 | no |
| PGM2L1       | 0.055294251  | 0.99528206   | 0.320344118 | 0.501713703 | no |
| DCPS         | 0.05527722   | 0.994974567  | 0.32049342  | 0.501910959 | no |
| PROZ         | -0.055273771 | -0.994912296 | 0.320523661 | 0.501921743 | no |
| NHEJ1        | 0.055268962  | 0.99482547   | 0.32056583  | 0.501926134 | no |
| SORT1        | 0.055268124  | 0.994810346  | 0.320573176 | 0.501926134 | no |
| TMEM253      | -0.055252438 | -0.994527126 | 0.320710756 | 0.502104965 | no |
| FPGS         | -0.055248647 | -0.994458678 | 0.320744011 | 0.502120451 | no |
| MAP7D3       | -0.055234361 | -0.994200748 | 0.320869348 | 0.502280076 | no |
| PHOX2B       | 0.055228629  | 0.994097263  | 0.320919644 | 0.502322219 | no |
| ARHGAP26-AS1 | -0.055212813 | -0.993811709 | 0.321058456 | 0.502502897 | no |
| GYP A        | -0.055204187 | -0.99365597  | 0.321134179 | 0.502584813 | no |
| ACVR1C       | -0.055197893 | -0.993542336 | 0.321189438 | 0.502634691 | no |
| AGPAT9       | 0.055189575  | 0.99339216   | 0.321262476 | 0.502712383 | no |
| LINC00558    | 0.055180621  | 0.993230494  | 0.321341114 | 0.502798827 | no |
| UGT1A8       | -0.05517781  | -0.993179744 | 0.321365803 | 0.50280085  | no |
| IGF2-AS      | -0.055157996 | -0.992822018 | 0.321539864 | 0.503036559 | no |
| PET100       | -0.05513614  | -0.99242742  | 0.321731937 | 0.503298449 | no |
| LOC1720      | -0.055133619 | -0.992381895 | 0.321754101 | 0.503298449 | no |
| CATSPER4     | -0.055129296 | -0.992303845 | 0.321792104 | 0.503321259 | no |
| C9orf173     | 0.055112159  | 0.991994455  | 0.321942772 | 0.503520276 | no |
| ZNF204P      | -0.055102499 | -0.991820037 | 0.322027732 | 0.503616503 | no |
| HIST1H1D     | 0.055088075  | 0.99155962   | 0.322154609 | 0.503778266 | no |
| SDK2         | -0.055084517 | -0.991495387 | 0.32218591  | 0.503790555 | no |
| AKT2         | 0.055072144  | 0.991271997  | 0.32229478  | 0.503903053 | no |
| APP          | -0.055071011 | -0.991251544 | 0.322304749 | 0.503903053 | no |
| CORO2A       | 0.055062936  | 0.991105761  | 0.322375812 | 0.503977491 | no |
| ZSWIM8       | -0.055052525 | -0.990917799 | 0.32246745  | 0.504084083 | no |
| CCDC25       | -0.054987782 | -0.989748926 | 0.323037701 | 0.504926528 | no |
| LBX1         | -0.054986006 | -0.989716849 | 0.32305336  | 0.504926528 | no |
| KRTAP5-9     | 0.054970694  | 0.989440421  | 0.32318832  | 0.505100734 | no |
| HOXA4        | 0.054963409  | 0.989308882  | 0.323252554 | 0.505164387 | no |
| WFDC8        | -0.054940189 | -0.988889683 | 0.323457316 | 0.505447624 | no |
| LNX1-AS1     | -0.054926563 | -0.988643673 | 0.323577522 | 0.505579998 | no |
| KRTAP5-4     | -0.054925253 | -0.988620026 | 0.323589078 | 0.505579998 | no |
| NUDT4        | -0.054893056 | -0.98803874  | 0.323873229 | 0.505987174 | no |
| ITGA3        | 0.054878444  | 0.987774947  | 0.324002234 | 0.506151923 | no |
| TIAL1        | -0.054872944 | -0.98767565  | 0.324050802 | 0.506167733 | no |
| LINC00313    | 0.054870354  | 0.987628891  | 0.324073675 | 0.506167733 | no |
| ZNF576       | 0.054869297  | 0.987609804  | 0.324083012 | 0.506167733 | no |
| FAM120B      | -0.054857529 | -0.987397353 | 0.324186949 | 0.506293273 | no |
| INCENP       | -0.054847429 | -0.987215007 | 0.324276176 | 0.506395822 | no |
| HDGFL1       | -0.054840227 | -0.987084996 | 0.324339804 | 0.506458383 | no |
| TMBIM6       | 0.054832415  | 0.986943948  | 0.324408842 | 0.506529383 | no |
| ZNF260       | -0.054815854 | -0.986644979 | 0.32455521  | 0.506721105 | no |
| LINC00608    | -0.054796998 | -0.986304557 | 0.324721924 | 0.506913332 | no |
| C19orf81     | 0.054796593  | 0.986297245  | 0.324725506 | 0.506913332 | no |
| OR6S1        | -0.054780049 | -0.985998567 | 0.324871824 | 0.507104908 | no |
| TRIM33       | -0.054776521 | -0.985934877 | 0.324903031 | 0.507116786 | no |

|              |              |              |             |             |    |
|--------------|--------------|--------------|-------------|-------------|----|
| GOLGB1       | 0.054755262  | 0.985551077  | 0.325091124 | 0.507373518 | no |
| WDR62        | -0.054749537 | -0.985447731 | 0.325141784 | 0.507415734 | no |
| DNAJA2       | -0.054723469 | -0.984977111 | 0.325372547 | 0.507738992 | no |
| AGAP11       | -0.05470801  | -0.984698034 | 0.32550944  | 0.507915731 | no |
| STAM2        | 0.054696681  | 0.984493501  | 0.325609791 | 0.508035431 | no |
| ABCC6P2      | -0.054691897 | -0.984407145 | 0.325652167 | 0.508064662 | no |
| HS3ST6       | -0.054675642 | -0.98411369  | 0.325796194 | 0.508245075 | no |
| CAND1        | -0.054673509 | -0.984075167 | 0.325815104 | 0.508245075 | no |
| LOC100289673 | 0.054656709  | 0.983771884  | 0.325964004 | 0.508440442 | no |
| CBY1         | -0.054610505 | -0.982937764 | 0.326373754 | 0.509022848 | no |
| IFNA16       | 0.054609264  | 0.98291537   | 0.326384759 | 0.509022848 | no |
| RTL1         | 0.054605973  | 0.982855945  | 0.326413964 | 0.509028636 | no |
| LOC440117    | -0.054602618 | -0.98279538  | 0.326443731 | 0.509028636 | no |
| RFC1         | -0.054600838 | -0.982763244 | 0.326459527 | 0.509028636 | no |
| TMEM170A     | -0.054585433 | -0.982485142 | 0.326596238 | 0.509204858 | no |
| CTRC         | -0.054577858 | -0.982348392 | 0.326663477 | 0.509272744 | no |
| PROM1        | 0.054546906  | 0.981789623  | 0.326938311 | 0.509664242 | no |
| NUP93        | -0.054530497 | -0.981493404 | 0.32708407  | 0.509845018 | no |
| CRAT         | -0.05452851  | -0.981457535 | 0.327101722 | 0.509845018 | no |
| KPTN         | -0.054523459 | -0.981366342 | 0.327146605 | 0.509860543 | no |
| FUT8         | -0.054522049 | -0.981340893 | 0.327159131 | 0.509860543 | no |
| SDCCAG3      | 0.054502576  | 0.980989358  | 0.32733219  | 0.510080828 | no |
| SH3GL1       | -0.054500803 | -0.980957351 | 0.327347949 | 0.510080828 | no |
| BRD2         | -0.054497002 | -0.980888724 | 0.327381742 | 0.5100965   | no |
| EPCAM        | -0.054485226 | -0.980676131 | 0.32748644  | 0.510157316 | no |
| SCARNA6      | -0.054484959 | -0.980671325 | 0.327488807 | 0.510157316 | no |
| HTR4         | 0.054484601  | 0.980664864  | 0.327491989 | 0.510157316 | no |
| NPFFR1       | -0.054469832 | -0.980398235 | 0.32762333  | 0.510324925 | no |
| SAP25        | 0.05446685   | 0.980344413  | 0.327649848 | 0.510329242 | no |
| LOC100506422 | -0.054462512 | -0.980266103 | 0.327688431 | 0.510347192 | no |
| OR6B3        | -0.054460215 | -0.980224631 | 0.327708866 | 0.510347192 | no |
| IGSF3        | -0.054448687 | -0.980016514 | 0.327811426 | 0.510446812 | no |
| NTS          | 0.054447685  | 0.97999843   | 0.327820339 | 0.510446812 | no |
| ARL2-SNX15   | -0.054444348 | -0.979938184 | 0.327850032 | 0.510456063 | no |
| LGALS1       | -0.054441315 | -0.979883434 | 0.327877018 | 0.510461098 | no |
| KLK14        | -0.054428969 | -0.979660556 | 0.32798689  | 0.510595165 | no |
| PLRG1        | 0.054421344  | 0.979522915  | 0.328054754 | 0.510663822 | no |
| RBBP7        | -0.054418532 | -0.979472153 | 0.328079785 | 0.510665797 | no |
| PAOX         | 0.054415699  | 0.979421015  | 0.328105002 | 0.510668062 | no |
| NEIL2        | -0.054405594 | -0.979238594 | 0.328194968 | 0.510771096 | no |
| HEMK1        | 0.054398776  | 0.97911551   | 0.32825568  | 0.51082859  | no |
| FAM92B       | 0.054385387  | 0.978873815  | 0.328374919 | 0.510977147 | no |
| AKAP10       | 0.054379849  | 0.978773832  | 0.328424253 | 0.511015204 | no |
| DIAPH3       | 0.054377303  | 0.978727873  | 0.328446932 | 0.511015204 | no |
| CCDC83       | -0.054363596 | -0.978480428 | 0.328569053 | 0.511168201 | no |
| MFSB6L       | 0.054333673  | 0.977940249  | 0.328835751 | 0.511546082 | no |
| RPL36A-HNRNF | -0.054325296 | -0.977789036 | 0.328910433 | 0.511625226 | no |
| FEZF1        | 0.054310511  | 0.977522144  | 0.329042275 | 0.511758823 | no |
| PF4          | 0.054306361  | 0.977447217  | 0.329079294 | 0.511758823 | no |
| SNRK-AS1     | -0.054305728 | -0.977435793 | 0.329084939 | 0.511758823 | no |
| DGKQ         | -0.054304984 | -0.977422371 | 0.32909157  | 0.511758823 | no |



|           |              |              |             |             |    |
|-----------|--------------|--------------|-------------|-------------|----|
| CPB2      | -0.054296018 | -0.97726051  | 0.329171553 | 0.511819651 | no |
| MAB21L2   | -0.05429526  | -0.977246822 | 0.329178317 | 0.511819651 | no |
| POFUT1    | 0.054288878  | 0.97713161   | 0.329235257 | 0.51187115  | no |
| THOC3     | -0.054260646 | -0.976621977 | 0.329487201 | 0.512189402 | no |
| ACRV1     | -0.054260599 | -0.976621126 | 0.329487622 | 0.512189402 | no |
| ZBTB17    | -0.054243036 | -0.976304084 | 0.32964442  | 0.512364478 | no |
| RPSAP9    | 0.054242342  | 0.976291557  | 0.329650616 | 0.512364478 | no |
| BTBD16    | -0.054238819 | -0.976227955 | 0.329682078 | 0.512364478 | no |
| ISL2      | -0.054237303 | -0.976200599 | 0.329695611 | 0.512364478 | no |
| EIF4G3    | 0.054232382  | 0.976111768  | 0.329739557 | 0.512371477 | no |
| ZCWPW2    | 0.054231445  | 0.97609485   | 0.329747926 | 0.512371477 | no |
| ZSWIM4    | -0.05422879  | -0.976046924 | 0.329771638 | 0.512371477 | no |
| C9orf16   | -0.054224458 | -0.97596871  | 0.329810337 | 0.51239456  | no |
| PNPLA8    | -0.054216694 | -0.975828557 | 0.32987969  | 0.512465261 | no |
| LOC375196 | -0.054210764 | -0.975721518 | 0.329932664 | 0.512510508 | no |
| DNAH6     | 0.054182788  | 0.975216501  | 0.33018267  | 0.512861792 | no |
| XYLB      | 0.054161698  | 0.974835791  | 0.330371219 | 0.513117574 | no |
| RACGAP1   | -0.054154867 | -0.974712485 | 0.330432303 | 0.513175359 | no |
| WNT8B     | -0.054149078 | -0.974607977 | 0.33048408  | 0.513192234 | no |
| TNXA      | 0.054148312  | 0.974594157  | 0.330490927 | 0.513192234 | no |
| CLEC18A   | 0.054131971  | 0.974299177  | 0.330637101 | 0.513382121 | no |
| MRPS17    | -0.054119999 | -0.974083068 | 0.330744218 | 0.513491158 | no |
| NOL7      | -0.054118782 | -0.974061094 | 0.330755111 | 0.513491158 | no |
| LOC388849 | -0.054111686 | -0.973932998 | 0.330818616 | 0.513552649 | no |
| SCUBE2    | 0.054102336  | 0.973764223  | 0.330902299 | 0.513645454 | no |
| KRT85     | 0.054087204  | 0.973491077  | 0.331037761 | 0.513818614 | no |
| PLA2G4D   | -0.054081769 | -0.973392957 | 0.331086431 | 0.513857044 | no |
| AADA3L3   | 0.054069875  | 0.973178251  | 0.331192947 | 0.513985241 | no |
| H2AFZ     | -0.054037963 | -0.972602199 | 0.331478836 | 0.514373528 | no |
| ZNF768    | -0.054036604 | -0.97257767  | 0.331491013 | 0.514373528 | no |
| SSRP1     | -0.054003538 | -0.971980795 | 0.331787413 | 0.514761268 | no |
| RBM34     | -0.054003383 | -0.971978003 | 0.331788799 | 0.514761268 | no |
| SELENBP1  | 0.053986863  | 0.971679799  | 0.331936948 | 0.514937698 | no |
| SLC12A4   | -0.053985359 | -0.971652649 | 0.331950438 | 0.514937698 | no |
| TPRXL     | -0.053981403 | -0.971581226 | 0.331985929 | 0.514955582 | no |
| C10orf107 | 0.053974829  | 0.971462571  | 0.332044895 | 0.515009875 | no |
| GLT8D2    | 0.053949458  | 0.971004598  | 0.332272548 | 0.51532578  | no |
| NRG2      | -0.053940465 | -0.970842264 | 0.332353267 | 0.515413773 | no |
| OTX1      | -0.053934777 | -0.970739586 | 0.33240433  | 0.515455765 | no |
| DUT       | -0.053926694 | -0.97059368  | 0.332476898 | 0.515517963 | no |
| NEK10     | 0.053923183  | 0.970530308  | 0.33250842  | 0.515517963 | no |
| STRIP1    | -0.053922294 | -0.970514261 | 0.332516402 | 0.515517963 | no |
| CCDC127   | -0.053905065 | -0.970203258 | 0.33267113  | 0.515720642 | no |
| DES       | 0.0538963    | 0.97004505   | 0.332749859 | 0.515768828 | no |
| OR2T34    | -0.053896261 | -0.970044341 | 0.332750211 | 0.515768828 | no |
| POTEC     | -0.053879489 | -0.969741587 | 0.332900903 | 0.515965189 | no |
| KLHL8     | -0.053861428 | -0.969415585 | 0.333063217 | 0.516149112 | no |
| MBNL1-AS1 | 0.053860231  | 0.969393966  | 0.333073982 | 0.516149112 | no |
| BBS5      | 0.053858268  | 0.969358546  | 0.333091621 | 0.516149112 | no |
| S100A3    | 0.053832462  | 0.968892728  | 0.333323649 | 0.516471416 | no |
| IGFL1     | -0.053808259 | -0.968455845 | 0.333541359 | 0.516771491 | no |

|              |              |              |             |             |    |
|--------------|--------------|--------------|-------------|-------------|----|
| ADH7         | -0.053799732 | -0.968301935 | 0.333618079 | 0.516853095 | no |
| SPICE1       | 0.053785542  | 0.968045786  | 0.333745786 | 0.517013673 | no |
| SCN4B        | 0.053768932  | 0.967745972  | 0.333895304 | 0.517208013 | no |
| C16orf90     | -0.053763837 | -0.967654013 | 0.333941172 | 0.517214011 | no |
| SCGB3A1      | -0.05376197  | -0.967620319 | 0.33395798  | 0.517214011 | no |
| SNORA28      | -0.053760483 | -0.967593466 | 0.333971376 | 0.517214011 | no |
| SIRT7        | 0.053747485  | 0.967358853  | 0.334088425 | 0.517358001 | no |
| GSTTP1       | -0.053739208 | -0.967209451 | 0.334162976 | 0.517422935 | no |
| LOC170425    | -0.053737484 | -0.967178325 | 0.334178509 | 0.517422935 | no |
| WIPF3        | 0.053720396  | 0.966869888  | 0.334332458 | 0.517571841 | no |
| SETMAR       | 0.053718421  | 0.966834232  | 0.334350257 | 0.517571841 | no |
| DNAH14       | 0.053717089  | 0.966810199  | 0.334362255 | 0.517571841 | no |
| TMEM131      | 0.053716117  | 0.966792655  | 0.334371013 | 0.517571841 | no |
| ANKRD20A5P   | -0.053711521 | -0.966709696 | 0.334412431 | 0.517586689 | no |
| IREB2        | -0.053709708 | -0.966676964 | 0.334428773 | 0.517586689 | no |
| PGLYRP1      | -0.053702296 | -0.966543183 | 0.334495573 | 0.517652795 | no |
| DUSP19       | -0.053699217 | -0.966487596 | 0.334523332 | 0.517658477 | no |
| EFR3A        | 0.053688931  | 0.96630193   | 0.334616058 | 0.517764685 | no |
| SBK2         | 0.05368321   | 0.966198668  | 0.334667637 | 0.517807213 | no |
| PRDM12       | -0.053674356 | -0.966038861 | 0.33474747  | 0.517871042 | no |
| APMAP        | 0.053672845  | 0.966011571  | 0.334761105 | 0.517871042 | no |
| ACOT8        | -0.053670618 | -0.965971386 | 0.334781182 | 0.517871042 | no |
| LOC100131089 | 0.05364724   | 0.9655494    | 0.334992062 | 0.518159955 | no |
| ZNF257       | -0.053640465 | -0.965427112 | 0.335053189 | 0.518217207 | no |
| GLRA4        | -0.053633934 | -0.965309235 | 0.335112119 | 0.518258555 | no |
| NBPF6        | -0.053632157 | -0.965277164 | 0.335128153 | 0.518258555 | no |
| KIAA0408     | -0.053612752 | -0.9649269   | 0.335303303 | 0.518464034 | no |
| CRIPAK       | -0.053612091 | -0.964914961 | 0.335309274 | 0.518464034 | no |
| 39326        | -0.053602542 | -0.964742611 | 0.33539548  | 0.518560019 | no |
| DLX3         | -0.053594673 | -0.964600572 | 0.335466537 | 0.518632569 | no |
| SSX5         | -0.053578609 | -0.964310618 | 0.335611619 | 0.518819544 | no |
| LINC00290    | -0.053560658 | -0.963986599 | 0.335773794 | 0.519032914 | no |
| RNPC3        | -0.053555814 | -0.963899168 | 0.335817563 | 0.519053699 | no |
| SNORA31      | 0.053550484  | 0.963802973  | 0.335865723 | 0.519053699 | no |
| ZGLP1        | -0.053550222 | -0.963798238 | 0.335868094 | 0.519053699 | no |
| RPLP1        | 0.053548479  | 0.963766771  | 0.335883849 | 0.519053699 | no |
| TOPORS       | -0.053536275 | -0.963546499 | 0.33599415  | 0.519186819 | no |
| LINC00226    | 0.053501896  | 0.962925972  | 0.336305004 | 0.519629796 | no |
| TOR1AIP2     | 0.053475573  | 0.962450847  | 0.336543144 | 0.519960367 | no |
| HAND2        | -0.053453735 | -0.96205669  | 0.336740784 | 0.520228322 | no |
| SNORA46      | -0.053450502 | -0.961998332 | 0.336770053 | 0.520236141 | no |
| E2F3         | -0.053445465 | -0.961907417 | 0.336815653 | 0.520269187 | no |
| AP4M1        | 0.053440261  | 0.96181348   | 0.336862773 | 0.520304575 | no |
| NCRUPAR      | -0.053411033 | -0.961285928 | 0.33712748  | 0.52067601  | no |
| EFCAB10      | 0.053404508  | 0.961168169  | 0.337186586 | 0.520724728 | no |
| SVOPL        | 0.053402202  | 0.961126535  | 0.337207484 | 0.520724728 | no |
| PKNOX1       | 0.053390751  | 0.960919863  | 0.337311238 | 0.520847522 | no |
| LOC100144602 | 0.053378393  | 0.960696814  | 0.337423236 | 0.520983028 | no |
| DCTN5        | -0.053368282 | -0.960514316 | 0.33751489  | 0.521087105 | no |
| PRAMEF10     | -0.053362597 | -0.960411697 | 0.337566434 | 0.521129247 | no |
| CEACAM19     | -0.053357171 | -0.960313766 | 0.337615629 | 0.521167755 | no |

|              |              |              |             |             |    |
|--------------|--------------|--------------|-------------|-------------|----|
| TRPV3        | -0.053351717 | -0.960215315 | 0.33766509  | 0.521184793 | no |
| UCN3         | -0.053350605 | -0.960195253 | 0.337675169 | 0.521184793 | no |
| NDUFB2       | -0.053329583 | -0.959815816 | 0.33786584  | 0.521441635 | no |
| DDX4         | -0.053314838 | -0.959549684 | 0.337999615 | 0.521610637 | no |
| MAP3K5       | -0.053307704 | -0.959420926 | 0.33806435  | 0.521658326 | no |
| FDPS         | -0.053306083 | -0.959391662 | 0.338079064 | 0.521658326 | no |
| MED16        | -0.053295521 | -0.95920103  | 0.338174924 | 0.521768776 | no |
| TAF9         | 0.053283584  | 0.95898558   | 0.338283284 | 0.521898497 | no |
| UBE2NL       | 0.05326642   | 0.958675797  | 0.338439129 | 0.522101452 | no |
| UBTD2        | -0.053263675 | -0.958626245 | 0.338464062 | 0.522102437 | no |
| KIF18A       | 0.053259945  | 0.958558915  | 0.338497942 | 0.522117222 | no |
| PITRM1       | -0.053244711 | -0.958283973 | 0.338636313 | 0.522259864 | no |
| ZNF252P      | -0.053244413 | -0.958278593 | 0.338639021 | 0.522259864 | no |
| LOC100505918 | -0.053232833 | -0.958069575 | 0.338744239 | 0.522368515 | no |
| P2RX3        | -0.053229303 | -0.95800587  | 0.338776312 | 0.522368515 | no |
| CCDC150      | -0.053228634 | -0.957993797 | 0.338782391 | 0.522368515 | no |
| LYZL6        | -0.053224168 | -0.957913186 | 0.338822978 | 0.522393617 | no |
| LOC285577    | -0.053218367 | -0.957808491 | 0.338875697 | 0.522437418 | no |
| FLJ41200     | -0.053207766 | -0.957617157 | 0.338972056 | 0.522548487 | no |
| BCL2L10      | -0.053197435 | -0.957430698 | 0.339065977 | 0.522655782 | no |
| CHIA         | -0.053185158 | -0.957209106 | 0.339177617 | 0.522787192 | no |
| TREX1        | 0.05318271   | 0.957164922  | 0.339199879 | 0.522787192 | no |
| RNF122       | -0.053172141 | -0.956974163 | 0.339296008 | 0.522897849 | no |
| NT5C1B-RDH14 | -0.053166119 | -0.956865481 | 0.339350784 | 0.522944765 | no |
| ZNF473       | -0.053156085 | -0.956684379 | 0.339442072 | 0.523021771 | no |
| NUGGC        | 0.053155277  | 0.956669786  | 0.339449428 | 0.523021771 | no |
| TESK1        | 0.053145556  | 0.956494336  | 0.339537883 | 0.523120557 | no |
| CEP57        | -0.053140866 | -0.956409698 | 0.33958056  | 0.523148803 | no |
| CABP2        | -0.053135579 | -0.956314262 | 0.339628685 | 0.52318544  | no |
| GUCY1B3      | -0.053130999 | -0.956231608 | 0.339670368 | 0.523212148 | no |
| CHORDC1      | 0.053120252  | 0.956037649  | 0.339768197 | 0.52332533  | no |
| C12orf75     | 0.053086284  | 0.955424567  | 0.340077542 | 0.523744272 | no |
| RIF1         | -0.053083142 | -0.955367868 | 0.340106159 | 0.523744272 | no |
| C9orf96      | -0.053082358 | -0.95535371  | 0.340113306 | 0.523744272 | no |
| VWA3B        | 0.053078658  | 0.955286941  | 0.340147009 | 0.523758642 | no |
| CDK11A       | 0.053075635  | 0.955232379  | 0.340174551 | 0.523763525 | no |
| KIAA1211L    | -0.053071845 | -0.955163967 | 0.340209088 | 0.523779175 | no |
| FGF13-AS1    | -0.053060433 | -0.954958005 | 0.340313077 | 0.523871149 | no |
| HCAR1        | -0.053059939 | -0.954949087 | 0.34031758  | 0.523871149 | no |
| ADIG         | 0.053053133  | 0.954826245  | 0.340379613 | 0.523929112 | no |
| MCCD1        | -0.053047988 | -0.954733389 | 0.340426508 | 0.523963767 | no |
| SMCR7        | -0.053038427 | -0.954560829 | 0.340513668 | 0.524060386 | no |
| C1orf204     | -0.053018926 | -0.95420887  | 0.340691485 | 0.524296506 | no |
| MDH1         | -0.053006173 | -0.953978699 | 0.340807804 | 0.524437958 | no |
| LOC286367    | 0.052998012  | 0.953831411  | 0.340882252 | 0.524514962 | no |
| CCDC14       | -0.052989057 | -0.953669789 | 0.340963956 | 0.52460312  | no |
| PCNXL2       | -0.052984556 | -0.953588552 | 0.341005029 | 0.524628754 | no |
| EFCC1        | 0.052979742  | 0.953501676  | 0.341048955 | 0.524658776 | no |
| DCD          | -0.05293503  | -0.952694701 | 0.341457158 | 0.525249143 | no |
| C12orf23     | 0.052930109  | 0.952605887  | 0.341502103 | 0.525280682 | no |
| IL36RN       | 0.052919709  | 0.952418188  | 0.341597102 | 0.525367991 | no |

|           |              |              |             |             |    |
|-----------|--------------|--------------|-------------|-------------|----|
| ELK4      | 0.052918543  | 0.952397138  | 0.341607757 | 0.525367991 | no |
| PADI3     | 0.052907195  | 0.95219234   | 0.341711432 | 0.52548983  | no |
| ZNF281    | -0.052900258 | -0.95206714  | 0.341774822 | 0.525549706 | no |
| BHLHE23   | -0.052842501 | -0.95102476  | 0.342302882 | 0.526300677 | no |
| PCDHB18   | -0.052841486 | -0.951006433 | 0.342312171 | 0.526300677 | no |
| GTPBP5    | -0.052831582 | -0.950827694 | 0.342402772 | 0.526402316 | no |
| CACUL1    | 0.052814534  | 0.950520004  | 0.342558775 | 0.52660448  | no |
| TMEM198B  | 0.052793422  | 0.950138994  | 0.342752014 | 0.526863854 | no |
| PTP4A1    | -0.052786431 | -0.950012812 | 0.342816027 | 0.526924562 | no |
| TRMT6     | 0.052778604  | 0.949871565  | 0.34288769  | 0.526997022 | no |
| DPPA2P3   | 0.052770639  | 0.94972781   | 0.342960637 | 0.527071442 | no |
| CDC16     | 0.052754416  | 0.949435033  | 0.343109232 | 0.527262102 | no |
| AP3S1     | 0.052734038  | 0.949067257  | 0.343295951 | 0.527511317 | no |
| LOC284100 | 0.052726475  | 0.948930759  | 0.343365267 | 0.527580106 | no |
| SLC25A46  | -0.052723246 | -0.948872498 | 0.343394856 | 0.52758785  | no |
| CENPBD1   | 0.05268994   | 0.94827141   | 0.343700223 | 0.527966173 | no |
| CYP24A1   | -0.05268988  | -0.948270324 | 0.343700775 | 0.527966173 | no |
| TATDN2    | -0.052688351 | -0.948242729 | 0.343714798 | 0.527966173 | no |
| PRB3      | -0.052661901 | -0.947765383 | 0.343957433 | 0.528301114 | no |
| SNTB1     | 0.05265891   | 0.947711401  | 0.343984878 | 0.528305512 | no |
| ORC5      | 0.052652931  | 0.947603493  | 0.344039746 | 0.528323693 | no |
| TM6SF2    | 0.052651825  | 0.947583536  | 0.344049894 | 0.528323693 | no |
| PPRC1     | -0.052649583 | -0.947543079 | 0.344070467 | 0.528323693 | no |
| AP1S1     | -0.052643768 | -0.947438123 | 0.344123842 | 0.528367899 | no |
| SNORA48   | -0.05262291  | -0.9470617   | 0.344315314 | 0.528624118 | no |
| DIXDC1    | -0.052605327 | -0.946744372 | 0.34447678  | 0.528834236 | no |
| PSG11     | 0.052601589  | 0.94667691   | 0.344511112 | 0.528849165 | no |
| YIF1A     | -0.052588629 | -0.946443033 | 0.344630155 | 0.528994119 | no |
| C15orf26  | 0.05257834   | 0.946257338  | 0.344724691 | 0.529101438 | no |
| EDA2R     | 0.052572791  | 0.946157204  | 0.344775676 | 0.529141902 | no |
| NPNT      | 0.052563491  | 0.945989365  | 0.344861144 | 0.529235279 | no |
| GMEB1     | 0.052553328  | 0.945805954  | 0.344954558 | 0.529340836 | no |
| FOLR4     | -0.052541161 | -0.945586371 | 0.345066416 | 0.529474678 | no |
| TTY5      | 0.052531499  | 0.945412004  | 0.345155257 | 0.529573187 | no |
| RAD18     | 0.052515064  | 0.945115401  | 0.345306412 | 0.529767282 | no |
| KCTD18    | -0.052497614 | -0.944800482 | 0.345466947 | 0.529975741 | no |
| NKX2-5    | 0.052494005  | 0.944735355  | 0.345500152 | 0.529988849 | no |
| HSPB2     | 0.052486991  | 0.944608777  | 0.345564695 | 0.530050022 | no |
| KLK10     | 0.052476425  | 0.944418099  | 0.345661937 | 0.530122016 | no |
| TAPT1-AS1 | 0.052475814  | 0.944407079  | 0.345667558 | 0.530122016 | no |
| ALG10     | 0.052473851  | 0.94437164   | 0.345685633 | 0.530122016 | no |
| IL6ST     | -0.052470399 | -0.944309342 | 0.345717409 | 0.530132917 | no |
| KIAA0922  | -0.052466793 | -0.944244268 | 0.345750603 | 0.530145991 | no |
| KRT5      | -0.052461    | -0.94413973  | 0.345803931 | 0.530189933 | no |
| TAF1B     | 0.052453731  | 0.944008541  | 0.345870863 | 0.530254723 | no |
| MUC4      | -0.052444871 | -0.943848652 | 0.345952448 | 0.530341969 | no |
| PCYT2     | -0.052438863 | -0.943740233 | 0.346007778 | 0.530365599 | no |
| SEPW1     | -0.052437838 | -0.943721732 | 0.346017219 | 0.530365599 | no |
| RWDD4     | 0.052425439  | 0.943497983  | 0.346131425 | 0.530460257 | no |
| NOTO      | -0.052424354 | -0.943478401 | 0.346141421 | 0.530460257 | no |
| SRRM2     | -0.052423095 | -0.943455671 | 0.346153024 | 0.530460257 | no |

|              |              |              |             |             |    |
|--------------|--------------|--------------|-------------|-------------|----|
| GRAMD1A      | 0.052413861  | 0.943289028  | 0.3462381   | 0.5305528   | no |
| SLC39A3      | 0.052383326  | 0.942737983  | 0.346519521 | 0.530946173 | no |
| CCIN         | 0.05236339   | 0.942378205  | 0.34670334  | 0.531176449 | no |
| SNX29        | 0.052361665  | 0.942347086  | 0.346719242 | 0.531176449 | no |
| LOC646498    | -0.052351755 | -0.942168248 | 0.34681064  | 0.53126631  | no |
| C16orf62     | -0.052349945 | -0.942135578 | 0.346827338 | 0.53126631  | no |
| LGALS7       | 0.052344371  | 0.94203498   | 0.346878759 | 0.531307206 | no |
| UQCRHL       | -0.052335697 | -0.941878458 | 0.346958775 | 0.531391892 | no |
| LOC401164    | 0.052322927  | 0.941647995  | 0.347076612 | 0.531534488 | no |
| TRMT10C      | -0.05231663  | -0.941534373 | 0.347134717 | 0.531585593 | no |
| PEX11B       | -0.052311594 | -0.941443485 | 0.347181201 | 0.531618895 | no |
| TENM2        | -0.052279971 | -0.940872804 | 0.34747316  | 0.532028048 | no |
| TMEM9B-AS1   | 0.05225831   | 0.940481915  | 0.347673228 | 0.532294848 | no |
| SEMA3B       | -0.052255743 | -0.940435583 | 0.347696947 | 0.532294848 | no |
| TIMM8B       | -0.052238079 | -0.940116829 | 0.347860156 | 0.532506775 | no |
| SMCP         | -0.052234799 | -0.940057634 | 0.347890471 | 0.532515249 | no |
| UBE2N        | -0.052228997 | -0.939952924 | 0.347944098 | 0.532559405 | no |
| GH2          | -0.052218804 | -0.939768982 | 0.348038317 | 0.532646424 | no |
| DCAF17       | 0.052217484  | 0.93974516   | 0.34805052  | 0.532646424 | no |
| TMED1        | 0.052210376  | 0.939616887  | 0.348116236 | 0.532709059 | no |
| OR2AE1       | 0.05220769   | 0.939568422  | 0.348141066 | 0.532709125 | no |
| LARP6        | 0.052196331  | 0.939363438  | 0.348246103 | 0.53283191  | no |
| MRGBP        | 0.052190341  | 0.939255343  | 0.3483015   | 0.532878732 | no |
| NFE2         | 0.052174905  | 0.938976784  | 0.348444285 | 0.533059234 | no |
| DEFB124      | -0.052169614 | -0.938881303 | 0.348493235 | 0.533096171 | no |
| C1orf53      | 0.052164308  | 0.938785551  | 0.348542328 | 0.533133322 | no |
| CCL15        | 0.052156708  | 0.938648409  | 0.348612651 | 0.533202938 | no |
| CDC25A       | -0.052150989 | -0.938545198 | 0.348665581 | 0.533245943 | no |
| IFT46        | 0.05213836   | 0.938317308  | 0.348782468 | 0.533386751 | no |
| ALDH1L1      | -0.052118382 | -0.937956781 | 0.348967437 | 0.533631649 | no |
| IRS4         | -0.052108638 | -0.937780948 | 0.349057671 | 0.533731655 | no |
| ELP6         | -0.052102627 | -0.937672484 | 0.34911334  | 0.533778799 | no |
| LOC100379224 | -0.052099292 | -0.93761229  | 0.349144237 | 0.533788063 | no |
| CARHSP1      | -0.052044119 | -0.936616671 | 0.349655532 | 0.534500121 | no |
| KRTAP2-1     | -0.0520408   | -0.936556771 | 0.349686308 | 0.534500121 | no |
| SPDYE5       | -0.052038945 | -0.936523295 | 0.349703509 | 0.534500121 | no |
| ZFYVE9       | -0.052038302 | -0.936511695 | 0.349709469 | 0.534500121 | no |
| AICDA        | -0.052034472 | -0.936442587 | 0.34974498  | 0.534504495 | no |
| OLIG3        | -0.052032629 | -0.936409325 | 0.349762073 | 0.534504495 | no |
| CAMK2N1      | -0.052018144 | -0.936147942 | 0.34989641  | 0.534671768 | no |
| SOX30        | 0.052007401  | 0.935954077  | 0.349996068 | 0.534766441 | no |
| LOC440288    | 0.0520035    | 0.935883689  | 0.350032256 | 0.534766441 | no |
| MTIF3        | -0.052003418 | -0.935882212 | 0.350033015 | 0.534766441 | no |
| NXNL2        | 0.051994263  | 0.935716995  | 0.350117966 | 0.534844176 | no |
| STAU2        | -0.05199257  | -0.935686455 | 0.35013367  | 0.534844176 | no |
| MDS2         | -0.051982074 | -0.935497046 | 0.350231079 | 0.534954948 | no |
| BIRC7        | 0.051977583  | 0.93541601   | 0.350272759 | 0.534980589 | no |
| ARHGAP11A    | -0.05193826  | -0.934706406 | 0.350637874 | 0.535489515 | no |
| FAM91A2      | 0.051936329  | 0.934671565  | 0.350655807 | 0.535489515 | no |
| HMGB2        | -0.051927712 | -0.934516069 | 0.35073585  | 0.535573692 | no |
| MIR498       | -0.051921925 | -0.934411641 | 0.350789611 | 0.535598624 | no |

|              |              |              |             |             |    |
|--------------|--------------|--------------|-------------|-------------|----|
| LOC100288974 | -0.051920589 | -0.934387537 | 0.350802021 | 0.535598624 | no |
| SLITRK6      | -0.051902105 | -0.934053989 | 0.350973777 | 0.535822793 | no |
| LINC00661    | -0.051887573 | -0.933791757 | 0.351108848 | 0.535990926 | no |
| CTSE         | 0.051881564  | 0.933683326  | 0.351164708 | 0.536038124 | no |
| MARVELD2     | 0.051876921  | 0.933599543  | 0.351207875 | 0.53606594  | no |
| NOC4L        | -0.05186352  | -0.93335773  | 0.351332479 | 0.536218047 | no |
| NLRP13       | -0.051849081 | -0.933097168 | 0.351466777 | 0.536384925 | no |
| KANSL2       | -0.051846089 | -0.933043175 | 0.35149461  | 0.536389311 | no |
| DOCK5        | 0.051838521  | 0.932906611  | 0.351565014 | 0.536458656 | no |
| ZKSCAN4      | 0.051834649  | 0.932836754  | 0.351601031 | 0.536475525 | no |
| PTPN13       | 0.051831664  | 0.932782879  | 0.35162881  | 0.536479821 | no |
| HMG20B       | 0.051807349  | 0.93234412   | 0.351855093 | 0.536786953 | no |
| OGFOD2       | 0.051789089  | 0.932014635  | 0.352025081 | 0.536997175 | no |
| CORO1B       | 0.05178718   | 0.931980172  | 0.352042864 | 0.536997175 | no |
| NCK1         | 0.051769769  | 0.931666003  | 0.352205004 | 0.537206369 | no |
| MTRNR2L7     | -0.051765157 | -0.93158278  | 0.352247962 | 0.537233763 | no |
| ZNF692       | -0.051756435 | -0.931425393 | 0.352329213 | 0.537319551 | no |
| POTEF        | 0.051743971  | 0.93120049   | 0.352445338 | 0.537427892 | no |
| VSIG8        | 0.051743442  | 0.931190944  | 0.352450268 | 0.537427892 | no |
| C14orf183    | -0.051718625 | -0.930743131 | 0.352681564 | 0.537742426 | no |
| ZNF3         | -0.051704956 | -0.930496472 | 0.352809006 | 0.537847647 | no |
| GAGE6        | 0.05170461   | 0.930490241  | 0.352812225 | 0.537847647 | no |
| LRP5L        | -0.05170317  | -0.930464255 | 0.352825654 | 0.537847647 | no |
| CTCFL        | -0.051697249 | -0.9303574   | 0.352880873 | 0.537893669 | no |
| ZSCAN9       | -0.051690685 | -0.930238961 | 0.352942085 | 0.53794882  | no |
| HCG11        | 0.05168473   | 0.930131517  | 0.352997621 | 0.537974132 | no |
| P2RY1        | 0.051683536  | 0.930109972  | 0.353008758 | 0.537974132 | no |
| URGCP-MRPS24 | -0.051660678 | -0.929697501 | 0.353222011 | 0.538260954 | no |
| CGGBP1       | 0.051656398  | 0.929620268  | 0.35326195  | 0.538283648 | no |
| PACRG        | 0.051635036  | 0.929234821  | 0.35346132  | 0.538549255 | no |
| EPHB2        | 0.051625884  | 0.929069676  | 0.353546762 | 0.538617192 | no |
| STC2         | -0.051624891 | -0.929051756 | 0.353556034 | 0.538617192 | no |
| KIAA0319     | -0.051606718 | -0.928723835 | 0.353725734 | 0.538837522 | no |
| ZFP28        | -0.051602425 | -0.92864637  | 0.353765831 | 0.538860406 | no |
| CEMP1        | 0.051598575  | 0.928576901  | 0.35380179  | 0.538876986 | no |
| EXOSC6       | -0.05159243  | -0.928466022 | 0.35385919  | 0.538926217 | no |
| RBMV2FP      | 0.05158357   | 0.928306148  | 0.353941963 | 0.539014083 | no |
| ELMO1        | 0.051575112  | 0.928153521  | 0.354020997 | 0.539088734 | no |
| ANKRD18DP    | -0.051572955 | -0.928114601 | 0.354041152 | 0.539088734 | no |
| ANKRD37      | 0.051542971  | 0.927573566  | 0.354321411 | 0.539477254 | no |
| SMOX         | 0.051533257  | 0.927398301  | 0.354412229 | 0.539577303 | no |
| LOC100506874 | 0.05152699   | 0.927285215  | 0.354470836 | 0.539628301 | no |
| RAVER1       | -0.051518901 | -0.92713925  | 0.35454649  | 0.539705243 | no |
| MET          | 0.051512028  | 0.927015246  | 0.354610771 | 0.539741961 | no |
| RBM28        | -0.051510952 | -0.926995821 | 0.354620841 | 0.539741961 | no |
| TUBA3E       | -0.051501836 | -0.926831326 | 0.354706124 | 0.539833532 | no |
| GALT         | 0.051496207  | 0.926729759  | 0.354758788 | 0.53987545  | no |
| TROAP        | -0.051491497 | -0.926644782 | 0.354802854 | 0.539904279 | no |
| HIPK1        | -0.051486305 | -0.926551089 | 0.354851443 | 0.539931122 | no |
| RFC4         | -0.051484243 | -0.926513879 | 0.354870741 | 0.539931122 | no |
| CEBPZ        | -0.051472574 | -0.926303341 | 0.354979946 | 0.540059042 | no |

|              |              |              |             |             |    |
|--------------|--------------|--------------|-------------|-------------|----|
| CNGB1        | 0.051464106  | 0.926150541  | 0.355059216 | 0.540141404 | no |
| ENTHD1       | 0.051456435  | 0.926012125  | 0.355131034 | 0.540202126 | no |
| ZNF530       | 0.051454473  | 0.925976723  | 0.355149404 | 0.540202126 | no |
| PPP1CB       | -0.051447291 | -0.92584713  | 0.355216654 | 0.540266179 | no |
| GABRA6       | 0.051443667  | 0.925781735  | 0.355250593 | 0.540279562 | no |
| SAP30L       | 0.051438844  | 0.925694721  | 0.355295755 | 0.54031001  | no |
| NABP2        | -0.051431254 | -0.925557768 | 0.355366842 | 0.540379878 | no |
| UGT2A3       | -0.051424355 | -0.925433283 | 0.355431467 | 0.540439908 | no |
| NAA11        | -0.051404283 | -0.925071102 | 0.35561953  | 0.540687606 | no |
| CDCP2        | -0.051390844 | -0.924828618 | 0.355745475 | 0.540805033 | no |
| GLS          | -0.051390672 | -0.924825506 | 0.355747092 | 0.540805033 | no |
| UBFD1        | 0.051385248  | 0.924727651  | 0.355797925 | 0.540810846 | no |
| MIR181B1     | 0.051384894  | 0.924721261  | 0.355801245 | 0.540810846 | no |
| TRMT12       | -0.051373882 | -0.924522559 | 0.355904481 | 0.540929505 | no |
| UNC119       | -0.051329792 | -0.923727016 | 0.356317998 | 0.541519702 | no |
| NR3C1        | -0.051320856 | -0.923565787 | 0.356401841 | 0.541608823 | no |
| LINC00577    | -0.051313679 | -0.92343628  | 0.356469197 | 0.541672878 | no |
| COMTD1       | 0.051309154  | 0.923354634  | 0.356511664 | 0.541699108 | no |
| DPY19L2P3    | 0.051302291  | 0.923230817  | 0.356576073 | 0.541718693 | no |
| TBC1D3G      | -0.051301236 | -0.923211767 | 0.356585983 | 0.541718693 | no |
| LRRC40       | -0.051299724 | -0.923184489 | 0.356600175 | 0.541718693 | no |
| FLCN         | 0.051294947  | 0.923098308  | 0.356645012 | 0.541748512 | no |
| FAM47A       | -0.051288015 | -0.922973229 | 0.356710092 | 0.541809074 | no |
| RPA2         | 0.05128352   | 0.922892117  | 0.3567523   | 0.541834889 | no |
| ANXA9        | -0.051276424 | -0.922764082 | 0.356818932 | 0.541897792 | no |
| DDX5         | 0.051253108  | 0.922343389  | 0.357037922 | 0.542171699 | no |
| C4orf48      | -0.05125185  | -0.922320682 | 0.357049744 | 0.542171699 | no |
| LOC402779    | -0.051249075 | -0.922270611 | 0.357075815 | 0.542172979 | no |
| C7orf33      | 0.051232212  | 0.921966353  | 0.357234259 | 0.542375236 | no |
| VWC2         | 0.051224243  | 0.921822576  | 0.357309148 | 0.542450614 | no |
| MIR196A2     | -0.051221443 | -0.921772055 | 0.357335465 | 0.542452248 | no |
| SF1          | -0.051208579 | -0.921539938 | 0.357456393 | 0.542597496 | no |
| RRP9         | -0.05119296  | -0.921258124 | 0.357603246 | 0.542781797 | no |
| SLC39A14     | 0.051190293  | 0.921210013  | 0.357628321 | 0.542781797 | no |
| ZNF804B      | -0.051186672 | -0.921144668 | 0.35766238  | 0.542795156 | no |
| IGFBPL1      | -0.051183462 | -0.921086761 | 0.357692563 | 0.542802632 | no |
| ZNF587       | 0.051161655  | 0.920693293  | 0.357897696 | 0.543075577 | no |
| MTPN         | 0.051148054  | 0.920447883  | 0.358025677 | 0.54323142  | no |
| PPEF2        | -0.051136119 | -0.920232544 | 0.358138001 | 0.543363486 | no |
| TRIM55       | -0.051132356 | -0.920164653 | 0.358173418 | 0.543378859 | no |
| GMPS         | 0.051129651  | 0.920115833  | 0.358198888 | 0.543379141 | no |
| AQP5         | 0.051123752  | 0.920009402  | 0.358254417 | 0.54342502  | no |
| WDR52        | -0.051115902 | -0.919867766 | 0.358328324 | 0.543498765 | no |
| BOLA3-AS1    | -0.051100762 | -0.919594609 | 0.358470885 | 0.543676626 | no |
| LOC729950    | -0.051097665 | -0.919538725 | 0.358500055 | 0.543682499 | no |
| CYP19A1      | 0.051092033  | 0.919437108  | 0.358553102 | 0.543684824 | no |
| LOC641367    | -0.051089658 | -0.919394252 | 0.358575475 | 0.543684824 | no |
| ZNF487P      | 0.051089445  | 0.919390405  | 0.358577484 | 0.543684824 | no |
| KIR2DL5B     | -0.051082847 | -0.919271359 | 0.358639637 | 0.543740701 | no |
| CRYBB2P1     | -0.051070612 | -0.919050604 | 0.35875491  | 0.543870097 | no |
| LOC100507003 | -0.051067365 | -0.918992019 | 0.358785506 | 0.543870097 | no |

|              |              |              |             |             |    |
|--------------|--------------|--------------|-------------|-------------|----|
| OTUD6B       | -0.05106573  | -0.918962535 | 0.358800904 | 0.543870097 | no |
| GAGE12D      | 0.051031854  | 0.918351311  | 0.359120219 | 0.544315723 | no |
| NOXO1        | -0.051023791 | -0.918205841 | 0.359196242 | 0.544392555 | no |
| FRG1         | -0.051004773 | -0.917862699 | 0.359375609 | 0.544625993 | no |
| SLC28A1      | 0.050999029  | 0.917759063  | 0.359429792 | 0.544669698 | no |
| VPS41        | 0.050995118  | 0.917688507  | 0.359466683 | 0.544687195 | no |
| UBE2T        | -0.050988472 | -0.917568584 | 0.359529393 | 0.54473989  | no |
| DCHS2        | 0.050986059  | 0.917525059  | 0.359552154 | 0.54473989  | no |
| AP1M2        | -0.0509798   | -0.917412117 | 0.359611222 | 0.544790975 | no |
| SLC10A5      | -0.050971921 | -0.917269973 | 0.35968557  | 0.54482722  | no |
| PRSS37       | -0.050971892 | -0.917269439 | 0.35968585  | 0.54482722  | no |
| PRSS16       | 0.050965133  | 0.917147492  | 0.359749642 | 0.544885443 | no |
| ZNF814       | -0.050957442 | -0.917008728 | 0.35982224  | 0.544956995 | no |
| PA2G4P4      | 0.050924231  | 0.916409531  | 0.360135832 | 0.545365933 | no |
| KDM5A        | 0.050921403  | 0.916358496  | 0.36016255  | 0.545365933 | no |
| GPR101       | -0.050919398 | -0.916322326 | 0.360181486 | 0.545365933 | no |
| CREB3L1      | 0.050918099  | 0.916298885  | 0.360193758 | 0.545365933 | no |
| TRIM11       | -0.050915155 | -0.916245777 | 0.360221563 | 0.545369611 | no |
| SNRPD2       | -0.05088248  | -0.915656238 | 0.360530316 | 0.545798607 | no |
| C22orf43     | -0.050872129 | -0.915469491 | 0.360628153 | 0.545908266 | no |
| CTDNBP1      | 0.050863642  | 0.915316359  | 0.360708393 | 0.545991271 | no |
| KRTAP8-1     | -0.050859936 | -0.915249495 | 0.360743432 | 0.546005852 | no |
| PCDHA12      | 0.050822969  | 0.914582545  | 0.361093057 | 0.546496541 | no |
| IL20RB       | -0.05081672  | -0.914469793 | 0.361152184 | 0.546547538 | no |
| GLCE         | 0.050810825  | 0.914363429  | 0.361207967 | 0.546584564 | no |
| ZNF710       | -0.050808759 | -0.914326156 | 0.361227517 | 0.546584564 | no |
| GGNBP2       | -0.050787596 | -0.913944328 | 0.36142782  | 0.54683583  | no |
| LTBP1        | 0.050785837  | 0.913912607  | 0.361444463 | 0.54683583  | no |
| SALL1        | -0.050740839 | -0.913100745 | 0.361870602 | 0.547370398 | no |
| TMEM216      | 0.05074077   | 0.913099514  | 0.361871249 | 0.547370398 | no |
| LOC100133920 | -0.050740458 | -0.913093877 | 0.361874209 | 0.547370398 | no |
| LOC286359    | -0.0507165   | -0.912661639 | 0.362101217 | 0.547675223 | no |
| AVPI1        | -0.050711323 | -0.912568238 | 0.362150282 | 0.547710888 | no |
| MED11        | -0.050705329 | -0.912460095 | 0.362207097 | 0.547758266 | no |
| FLJ40852     | -0.050701522 | -0.912391409 | 0.362243185 | 0.547774296 | no |
| TELO2        | -0.050696668 | -0.912303829 | 0.362289204 | 0.547805339 | no |
| MID1IP1      | -0.050691771 | -0.912215485 | 0.362335628 | 0.547826635 | no |
| LINC00838    | 0.050687383  | 0.912136306  | 0.362377239 | 0.547826635 | no |
| SPOCK2       | 0.050687117  | 0.912131506  | 0.362379761 | 0.547826635 | no |
| GPS2         | -0.050667718 | -0.911781526 | 0.362563723 | 0.548066186 | no |
| TMEM202      | -0.050664232 | -0.911718625 | 0.362596792 | 0.548077624 | no |
| LOC100129175 | 0.050650751  | 0.911475408  | 0.362724677 | 0.54819797  | no |
| YY1          | 0.050650461  | 0.911470179  | 0.362727427 | 0.54819797  | no |
| PCID2        | -0.050643978 | -0.911353213 | 0.362788939 | 0.548252379 | no |
| ARAP2        | -0.050620356 | -0.910927047 | 0.363013113 | 0.548552582 | no |
| HINT1        | 0.050615447  | 0.910838467  | 0.36305972  | 0.548580151 | no |
| LOC100507205 | 0.050613057  | 0.910795344  | 0.36308241  | 0.548580151 | no |
| EIF3D        | -0.050591022 | -0.910397812 | 0.363291626 | 0.548820736 | no |
| GTF2H2D      | 0.050590907  | 0.910395739  | 0.363292717 | 0.548820736 | no |
| LOC100093698 | -0.050581358 | -0.91022345  | 0.363383414 | 0.548919164 | no |
| TCTE1        | -0.050571034 | -0.910037194 | 0.36348148  | 0.54902871  | no |



|              |              |              |             |             |    |
|--------------|--------------|--------------|-------------|-------------|----|
| HOXC6        | -0.050567375 | -0.909971188 | 0.363516237 | 0.549040012 | no |
| LOC653513    | -0.050564868 | -0.909925953 | 0.363540058 | 0.549040012 | no |
| PLSCR5       | -0.050547333 | -0.909609597 | 0.363706677 | 0.549229217 | no |
| IFT88        | -0.05054245  | -0.909521508 | 0.363753081 | 0.549229217 | no |
| POU6F2-AS1   | -0.05054233  | -0.90951934  | 0.363754223 | 0.549229217 | no |
| GUCY1A2      | -0.050540926 | -0.909494019 | 0.363767562 | 0.549229217 | no |
| CDC20B       | 0.050530727  | 0.909310015  | 0.363864506 | 0.549336994 | no |
| C9orf50      | 0.050518435  | 0.909088251  | 0.363981367 | 0.549456031 | no |
| PPIL6        | -0.050517055 | -0.909063356 | 0.363994487 | 0.549456031 | no |
| PKHD1        | 0.050514082  | 0.909009703  | 0.364022764 | 0.549460122 | no |
| C12orf69     | 0.050510918  | 0.908952636  | 0.364052841 | 0.54946693  | no |
| CXXC1P1      | 0.050502233  | 0.908795943  | 0.364135436 | 0.549549647 | no |
| NCKIPSD      | -0.050498698 | -0.908732167 | 0.364169057 | 0.549549647 | no |
| CALU         | 0.050497089  | 0.90870314   | 0.364184359 | 0.549549647 | no |
| LINC00514    | -0.050488663 | -0.90855112  | 0.364264509 | 0.549631999 | no |
| WDFY1        | 0.050473728  | 0.908281671  | 0.364406598 | 0.549791851 | no |
| SLC6A2       | 0.050472149  | 0.908253198  | 0.364421615 | 0.549791851 | no |
| DDX23        | -0.050466945 | -0.908159307 | 0.364471136 | 0.549827964 | no |
| MIR3666      | -0.050457195 | -0.907983412 | 0.36456392  | 0.549929333 | no |
| CCDC179      | -0.050453536 | -0.907917385 | 0.364598753 | 0.549943276 | no |
| VTCN1        | -0.05044278  | -0.907723342 | 0.364701133 | 0.550059096 | no |
| COX7B        | 0.050428734  | 0.907469933  | 0.364834864 | 0.550222179 | no |
| CBLC         | 0.050412463  | 0.907176404  | 0.364989805 | 0.550417226 | no |
| ENPP2        | -0.050407707 | -0.907090591 | 0.365035109 | 0.550446922 | no |
| CELA2B       | -0.050396773 | -0.906893331 | 0.365139266 | 0.550565352 | no |
| GOLGA3       | 0.050393897  | 0.906841444  | 0.365166666 | 0.550568038 | no |
| MKX          | -0.050382553 | -0.906636785 | 0.365274753 | 0.550692369 | no |
| TNFRSF8      | 0.050366726  | 0.906351265  | 0.36542558  | 0.550796459 | no |
| LOC339529    | -0.050364827 | -0.906317    | 0.365443684 | 0.550796459 | no |
| TMEM184B     | -0.050364378 | -0.906308901 | 0.365447963 | 0.550796459 | no |
| ZNF480       | 0.050363741  | 0.906297402  | 0.365454038 | 0.550796459 | no |
| UBE2L3       | -0.050361862 | -0.906263515 | 0.365471942 | 0.550796459 | no |
| INGX         | -0.050352573 | -0.90609592  | 0.3655605   | 0.550891291 | no |
| WDYHV1       | -0.050295389 | -0.905064285 | 0.366105916 | 0.551674537 | no |
| SPANXN4      | 0.050289392  | 0.904956097  | 0.366163144 | 0.551722086 | no |
| GPC3         | -0.050286188 | -0.9048983   | 0.366193719 | 0.551729473 | no |
| HIATL2       | -0.050281067 | -0.904805913 | 0.366242595 | 0.551764431 | no |
| EML6         | -0.050275815 | -0.904711165 | 0.366292725 | 0.551801272 | no |
| LOC100506207 | -0.050267854 | -0.904567542 | 0.366368722 | 0.551877073 | no |
| OPA1         | -0.05026101  | -0.904444079 | 0.366434059 | 0.551900863 | no |
| CNIH         | -0.050259624 | -0.904419069 | 0.366447295 | 0.551900863 | no |
| SFRP5        | -0.050255481 | -0.904344321 | 0.366486857 | 0.551900863 | no |
| SAMD4B       | 0.050255441  | 0.904343602  | 0.366487237 | 0.551900863 | no |
| ENTPD4       | 0.050228747  | 0.903862041  | 0.366742175 | 0.552246082 | no |
| UCN2         | 0.050221907  | 0.903738631  | 0.366807526 | 0.55230579  | no |
| FOXP2        | -0.050218579 | -0.903678595 | 0.36683932  | 0.552314966 | no |
| RNF14        | 0.050212113  | 0.903561959  | 0.366901094 | 0.552369276 | no |
| HIST1H2BH    | 0.050200838  | 0.903358546  | 0.367008843 | 0.552439902 | no |
| GBX1         | -0.050199807 | -0.903339939 | 0.3670187   | 0.552439902 | no |
| FOXE3        | -0.050199135 | -0.903327816 | 0.367025123 | 0.552439902 | no |
| BRIP1        | -0.050194033 | -0.903235789 | 0.367073878 | 0.552469373 | no |

|              |              |              |             |             |    |
|--------------|--------------|--------------|-------------|-------------|----|
| RBAK-LOC3894 | 0.050191707  | 0.903193815  | 0.367096117 | 0.552469373 | no |
| BTC          | 0.050179739  | 0.902977909  | 0.367210522 | 0.552568548 | no |
| TPO          | -0.050179434 | -0.902972407 | 0.367213438 | 0.552568548 | no |
| RNF10        | 0.050172225  | 0.902842365  | 0.367282357 | 0.552633559 | no |
| GRSF1        | 0.050169281  | 0.90278925   | 0.367310508 | 0.552637225 | no |
| SLC25A2      | -0.050144856 | -0.902348616 | 0.367544103 | 0.55289372  | no |
| TULP1        | -0.050144673 | -0.902345316 | 0.367545852 | 0.55289372  | no |
| LOC340515    | -0.050143386 | -0.902322091 | 0.367558168 | 0.55289372  | no |
| ZNF407       | -0.050138488 | -0.902233742 | 0.367605017 | 0.552925491 | no |
| GEMIN4       | -0.050131819 | -0.902113426 | 0.367668823 | 0.552982761 | no |
| CARM1        | 0.050126837  | 0.902023546  | 0.367716492 | 0.55299106  | no |
| PI3          | 0.050125864  | 0.902005991  | 0.367725804 | 0.55299106  | no |
| DNAJC30      | 0.050111699  | 0.90175046   | 0.367861354 | 0.553156196 | no |
| NFASC        | -0.05008445  | -0.901258887 | 0.368122203 | 0.553509709 | no |
| UBE2MP1      | -0.050074822 | -0.901085187 | 0.368214404 | 0.553590002 | no |
| PFKFB4       | 0.050073494  | 0.901061229  | 0.368227122 | 0.553590002 | no |
| SLC5A7       | -0.050061006 | -0.900835958 | 0.36834672  | 0.553700176 | no |
| KDM4A        | 0.050059692  | 0.900812239  | 0.368359314 | 0.553700176 | no |
| MMAA         | 0.050057772  | 0.900777615  | 0.368377698 | 0.553700176 | no |
| RBBP4        | 0.050052562  | 0.90068363   | 0.368427606 | 0.553736463 | no |
| PCCA-AS1     | -0.050045288 | -0.900552396 | 0.3684973   | 0.553786401 | no |
| LOC100289656 | 0.050041705  | 0.900487769  | 0.368531624 | 0.553786401 | no |
| TSTD3        | -0.050041026 | -0.900475507 | 0.368538137 | 0.553786401 | no |
| LOC285889    | -0.050037546 | -0.900412741 | 0.368571475 | 0.553797075 | no |
| SNX12        | -0.050034906 | -0.900365105 | 0.368596778 | 0.553797075 | no |
| MEG8         | -0.050019826 | -0.900093061 | 0.368741303 | 0.553975486 | no |
| C13orf35     | -0.050006369 | -0.899850314 | 0.368870293 | 0.554130537 | no |
| ITSN1        | 0.049998688  | 0.899711735  | 0.368943942 | 0.554202437 | no |
| DNAJC5       | -0.049983132 | -0.899431108 | 0.369093115 | 0.554387099 | no |
| KCTD17       | -0.049980488 | -0.89938342  | 0.369118468 | 0.554387099 | no |
| TMEM110-MUST | -0.049969135 | -0.899178622 | 0.36922736  | 0.5545003   | no |
| IZUMO3       | -0.049967251 | -0.899144619 | 0.369245442 | 0.5545003   | no |
| ANKRD30B     | -0.049958541 | -0.898987502 | 0.369328998 | 0.554568543 | no |
| LINC00379    | -0.049957134 | -0.898962125 | 0.369342495 | 0.554568543 | no |
| TBC1D29      | -0.049954335 | -0.898911623 | 0.369369356 | 0.554570129 | no |
| NIPBL        | -0.049945348 | -0.898749502 | 0.369455592 | 0.554647477 | no |
| LOC344967    | -0.049943587 | -0.898717736 | 0.36947249  | 0.554647477 | no |
| BMP8A        | 0.049935589  | 0.898573453  | 0.36954925  | 0.55472396  | no |
| PTGDS        | -0.049930395 | -0.898479759 | 0.369599101 | 0.554760043 | no |
| SLC3A1       | -0.04992595  | -0.898399569 | 0.369641771 | 0.554785342 | no |
| GLB1L3       | -0.04990684  | -0.898054836 | 0.369825242 | 0.555021946 | no |
| MMP13        | 0.049892059  | 0.897788191  | 0.369967192 | 0.555167929 | no |
| LINC00502    | 0.049889715  | 0.897745901  | 0.369989709 | 0.555167929 | no |
| OR4C45       | 0.049888642  | 0.897726551  | 0.370000012 | 0.555167929 | no |
| TMPRSS3      | 0.049876961  | 0.897515826  | 0.370112223 | 0.555252971 | no |
| FAM198A      | -0.049876383 | -0.8975054   | 0.370117775 | 0.555252971 | no |
| MTMR10       | -0.049874673 | -0.897474562 | 0.370134198 | 0.555252971 | no |
| FH           | 0.049863624  | 0.897275231  | 0.370240366 | 0.555373469 | no |
| FAM98C       | -0.049858236 | -0.897178037 | 0.37029214  | 0.555408124 | no |
| OTOP1        | -0.049853613 | -0.897094648 | 0.370336564 | 0.555408124 | no |
| AGL          | 0.049853152  | 0.897086322  | 0.370340999 | 0.555408124 | no |

|           |              |              |             |             |    |
|-----------|--------------|--------------|-------------|-------------|----|
| HSF1      | -0.049839887 | -0.896847046 | 0.370468489 | 0.555560554 | no |
| HVCN1     | -0.049822624 | -0.896535625 | 0.370634459 | 0.55576227  | no |
| POLR1E    | -0.049820517 | -0.896497612 | 0.370654721 | 0.55576227  | no |
| DHRS4     | 0.049811122  | 0.896328138  | 0.370745064 | 0.555858949 | no |
| ESPNP     | -0.04980815  | -0.896274527 | 0.370773646 | 0.555863023 | no |
| DUS1L     | 0.049801042  | 0.896146305  | 0.370842011 | 0.555926734 | no |
| GEMIN6    | 0.049753205  | 0.89528336   | 0.371302316 | 0.556577951 | no |
| HHIP      | -0.049743826 | -0.895114164 | 0.371392609 | 0.55664004  | no |
| MGC70870  | 0.049742099  | 0.89508302   | 0.371409231 | 0.55664004  | no |
| C7orf71   | 0.049739608  | 0.895038082  | 0.371433215 | 0.55664004  | no |
| TMEM95    | -0.049738141 | -0.895011617 | 0.371447341 | 0.55664004  | no |
| ADH5      | 0.049732633  | 0.894912258  | 0.371500376 | 0.556680699 | no |
| AFMID     | 0.049711978  | 0.894539663  | 0.371699299 | 0.556939945 | no |
| OR51G1    | -0.049707439 | -0.89445779  | 0.371743018 | 0.556966621 | no |
| MC5R      | 0.049702909  | 0.894376065  | 0.371786662 | 0.55699318  | no |
| CCDC70    | 0.049667834  | 0.893743356  | 0.372124658 | 0.557460687 | no |
| PCDHB7    | 0.049664321  | 0.893679972  | 0.372158528 | 0.557472567 | no |
| TUBA3C    | -0.049651315 | -0.893445369 | 0.372283909 | 0.557621515 | no |
| NDST2     | 0.049648619  | 0.89339674   | 0.372309902 | 0.557621584 | no |
| METTL23   | 0.049635379  | 0.893157892  | 0.372437585 | 0.557773947 | no |
| C9orf139  | 0.049621753  | 0.8929121    | 0.372569008 | 0.55793189  | no |
| POLA1     | -0.049616506 | -0.89281746  | 0.372619619 | 0.557961066 | no |
| ID3       | 0.049614351  | 0.892778574  | 0.372640416 | 0.557961066 | no |
| PKP2      | 0.049600987  | 0.892537513  | 0.372769352 | 0.55811524  | no |
| P4HTM     | -0.049581608 | -0.892187937 | 0.372956381 | 0.558356362 | no |
| CDK5RAP2  | 0.049576073  | 0.89208809   | 0.373009811 | 0.558397454 | no |
| CDH1      | -0.049573078 | -0.892034073 | 0.373038718 | 0.558401832 | no |
| XK        | -0.049562459 | -0.891842519 | 0.373141242 | 0.558502121 | no |
| DCLRE1C   | -0.049560756 | -0.891811786 | 0.373157692 | 0.558502121 | no |
| MIR1257   | -0.049555979 | -0.891725621 | 0.373203816 | 0.558532257 | no |
| PABPC3    | 0.04955136   | 0.891642306  | 0.373248418 | 0.55856011  | no |
| FLJ44511  | 0.049545302  | 0.89153302   | 0.373306928 | 0.558599447 | no |
| LRRC18    | 0.049543256  | 0.891496114  | 0.373326688 | 0.558599447 | no |
| ASCL4     | 0.049539882  | 0.89143525   | 0.373359277 | 0.558609317 | no |
| TEX11     | -0.049533659 | -0.891322994 | 0.373419388 | 0.55866036  | no |
| L1TD1     | 0.049527834  | 0.891217931  | 0.373475653 | 0.558705643 | no |
| CHCHD4    | -0.049519586 | -0.891069151 | 0.373555339 | 0.558785953 | no |
| USP17L1P  | -0.049514528 | -0.890977901 | 0.373604218 | 0.558820173 | no |
| BUD31     | 0.049508353  | 0.890866514  | 0.373663888 | 0.558865207 | no |
| ABLIM3    | -0.04950603  | -0.890824615 | 0.373686335 | 0.558865207 | no |
| LINC00633 | -0.049500187 | -0.890719222 | 0.373742802 | 0.558910761 | no |
| ZNF799    | 0.049495362  | 0.890632191  | 0.373789434 | 0.558941604 | no |
| OR4A47    | -0.049474309 | -0.890252419 | 0.373992966 | 0.559207043 | no |
| C1orf172  | -0.049466446 | -0.89011058  | 0.374069    | 0.559274048 | no |
| ZNF764    | 0.049464292  | 0.890071734  | 0.374089825 | 0.559274048 | no |
| CEACAM5   | -0.049459494 | -0.889985181 | 0.374136229 | 0.559304514 | no |
| DLG1      | -0.04944734  | -0.889765936 | 0.374253789 | 0.559441342 | no |
| AFG3L2    | -0.049428697 | -0.889429654 | 0.374434148 | 0.559672018 | no |
| CERKL     | -0.049421403 | -0.889298079 | 0.374504731 | 0.55973859  | no |
| SLC22A13  | -0.049414509 | -0.889173723 | 0.374571449 | 0.559773167 | no |
| FAM63B    | -0.049413629 | -0.889157861 | 0.374579959 | 0.559773167 | no |

|              |              |              |             |             |    |
|--------------|--------------|--------------|-------------|-------------|----|
| CTRB2        | -0.049390752 | -0.888745203 | 0.37480141  | 0.560065158 | no |
| TMEM239      | -0.049383072 | -0.888606669 | 0.374875771 | 0.560137329 | no |
| LOC285819    | -0.049376425 | -0.888486764 | 0.37494014  | 0.56019456  | no |
| SMARCA2      | -0.049356233 | -0.888122538 | 0.375135712 | 0.560444778 | no |
| WBP2NL       | -0.04935375  | -0.888077746 | 0.375159768 | 0.560444778 | no |
| CDC47L       | 0.04934802   | 0.887974394  | 0.375215277 | 0.560488741 | no |
| SEMA3E       | 0.049330184  | 0.887652673  | 0.375388101 | 0.56068607  | no |
| CCDC103      | 0.049329002  | 0.887631351  | 0.375399556 | 0.56068607  | no |
| ZNF766       | 0.049309696  | 0.887283102  | 0.37558669  | 0.560926585 | no |
| PPAT         | -0.049304356 | -0.887186775 | 0.375638463 | 0.560964922 | no |
| PICK1        | 0.049301474  | 0.887134787  | 0.375666406 | 0.560967672 | no |
| SLC52A3      | -0.049294115 | -0.887002058 | 0.375737753 | 0.561035229 | no |
| SLC37A3      | -0.049290736 | -0.886941098 | 0.375770525 | 0.561045182 | no |
| GABRR3       | -0.049278359 | -0.886717852 | 0.375890554 | 0.561139505 | no |
| EXD1         | -0.049277948 | -0.886710438 | 0.375894541 | 0.561139505 | no |
| OR1B1        | -0.049271922 | -0.886601738 | 0.375952993 | 0.561139505 | no |
| RBM17        | 0.0492718    | 0.886599542  | 0.375954174 | 0.561139505 | no |
| SNAR-D       | -0.04926944  | -0.886556976 | 0.375977065 | 0.561139505 | no |
| MIR3939      | -0.04926741  | -0.886520358 | 0.375996758 | 0.561139505 | no |
| GEMIN5       | -0.049265378 | -0.8864837   | 0.376016473 | 0.561139505 | no |
| ACPL2        | 0.049260192  | 0.886390152  | 0.376066787 | 0.561175623 | no |
| PRSS3P2      | 0.049256259  | 0.886319213  | 0.376104944 | 0.561193595 | no |
| LOC554223    | -0.049251856 | -0.886239784 | 0.37614767  | 0.561218382 | no |
| CAPN3        | -0.049239574 | -0.886018253 | 0.376266852 | 0.561348678 | no |
| AKR7A3       | -0.049237473 | -0.885980361 | 0.376287239 | 0.561348678 | no |
| MIR3689D2    | -0.049227181 | -0.885794719 | 0.376387135 | 0.561409124 | no |
| SLC22A7      | 0.049225907  | 0.885771731  | 0.376399505 | 0.561409124 | no |
| LCN1         | -0.049225225 | -0.885759428 | 0.376406127 | 0.561409124 | no |
| SPTLC2       | 0.049217991  | 0.88562894   | 0.376476355 | 0.561474903 | no |
| IRS1         | 0.049213678  | 0.88555115   | 0.376518225 | 0.561498382 | no |
| C10orf32-AS3 | 0.049210635  | 0.885496265  | 0.376547768 | 0.561503476 | no |
| SCGB1A1      | -0.049196272 | -0.885237181 | 0.376687248 | 0.561672493 | no |
| SPEM1        | -0.049178829 | -0.884922554 | 0.376856671 | 0.561854397 | no |
| LOC100132354 | -0.049173002 | -0.884817446 | 0.376913281 | 0.561854397 | no |
| CDH4         | -0.049171675 | -0.884793512 | 0.376926173 | 0.561854397 | no |
| NOX1         | -0.049171366 | -0.884787934 | 0.376929177 | 0.561854397 | no |
| CCNJL        | -0.049170256 | -0.884767914 | 0.37693996  | 0.561854397 | no |
| SNORA35      | -0.04916241  | -0.884626386 | 0.377016198 | 0.561890854 | no |
| C6orf10      | -0.049159398 | -0.884572064 | 0.377045462 | 0.561890854 | no |
| C1QTNF8      | -0.049159222 | -0.884568887 | 0.377047174 | 0.561890854 | no |
| DOK5         | -0.049156976 | -0.884528372 | 0.377069001 | 0.561890854 | no |
| KRTAP9-2     | -0.049152135 | -0.884441066 | 0.377116039 | 0.561921986 | no |
| ATP7B        | -0.049145106 | -0.884314268 | 0.377184361 | 0.561984824 | no |
| TRIB3        | 0.049140423  | 0.884229799  | 0.377229879 | 0.56201368  | no |
| ABP1         | 0.049133316  | 0.884101619  | 0.377298959 | 0.562065535 | no |
| FNTB         | 0.049131461  | 0.88406816   | 0.377316992 | 0.562065535 | no |
| TEX14        | -0.049115644 | -0.883782859 | 0.377470781 | 0.562255653 | no |
| FAM64A       | -0.049110478 | -0.883689676 | 0.377521019 | 0.562268668 | no |
| MAGOHB       | -0.04910649  | -0.883617735 | 0.377559808 | 0.562268668 | no |
| LIMK1        | 0.049106039  | 0.88360961   | 0.377564188 | 0.562268668 | no |
| FUK          | 0.049101444  | 0.88352673   | 0.377608878 | 0.562268668 | no |

|              |              |              |             |             |    |
|--------------|--------------|--------------|-------------|-------------|----|
| TCHH         | 0.049100457  | 0.883508924  | 0.37761848  | 0.562268668 | no |
| LOC286370    | -0.049098605 | -0.883475512 | 0.377636497 | 0.562268668 | no |
| MIR216A      | -0.049089969 | -0.883319739 | 0.377720505 | 0.562354788 | no |
| DPEP3        | 0.049082186  | 0.883179358  | 0.377796221 | 0.562389886 | no |
| FOXF1-AS1    | -0.049082166 | -0.883178996 | 0.377796416 | 0.562389886 | no |
| SPDYE2       | -0.049072788 | -0.883009835 | 0.377887668 | 0.562486762 | no |
| OCIAD2       | -0.049067042 | -0.882906207 | 0.377943575 | 0.562531018 | no |
| MIR545       | -0.049058019 | -0.882743452 | 0.378031392 | 0.562622759 | no |
| BPESC1       | -0.049049268 | -0.882585604 | 0.378116574 | 0.562710566 | no |
| ZNF395       | -0.049042543 | -0.882464306 | 0.378182039 | 0.562769021 | no |
| CASC4        | 0.049035924  | 0.882344914  | 0.378246483 | 0.562825948 | no |
| OR5D13       | 0.049008433  | 0.881849059  | 0.378514201 | 0.563185315 | no |
| HSD17B4      | -0.04900217  | -0.881736094 | 0.378575209 | 0.563237093 | no |
| LOC100505841 | -0.048988004 | -0.881480574 | 0.378713227 | 0.563370963 | no |
| PGA5         | -0.048987553 | -0.881472448 | 0.378717617 | 0.563370963 | no |
| MAEL         | -0.048972227 | -0.881195998 | 0.378866976 | 0.563472    | no |
| FSHB         | -0.048968993 | -0.881137683 | 0.378898487 | 0.563472    | no |
| ERGIC2       | 0.048968608  | 0.881130734  | 0.378902242 | 0.563472    | no |
| MRPL19       | -0.048967767 | -0.881115555 | 0.378910444 | 0.563472    | no |
| ELF5         | -0.0489642   | -0.881051217 | 0.378945212 | 0.563472    | no |
| SLC18A1      | -0.048962975 | -0.881029132 | 0.378957147 | 0.563472    | no |
| GPR20        | 0.048961752  | 0.88100707   | 0.37896907  | 0.563472    | no |
| SYT8         | -0.048953399 | -0.880856409 | 0.379050498 | 0.563521395 | no |
| ZNF566       | -0.048952965 | -0.880848571 | 0.379054734 | 0.563521395 | no |
| TMEM144      | -0.048933236 | -0.880492733 | 0.379247097 | 0.563768373 | no |
| BRDT         | -0.048928544 | -0.880408099 | 0.379292859 | 0.563797401 | no |
| GINS1        | -0.048924182 | -0.880329427 | 0.3793354   | 0.563821639 | no |
| LOC649330    | 0.048915223  | 0.880167829  | 0.379422791 | 0.563912531 | no |
| C1orf131     | 0.048908742  | 0.880050934  | 0.379486014 | 0.563967494 | no |
| PPP1R11      | -0.048900263 | -0.879897999 | 0.37956874  | 0.564051431 | no |
| CCT8L2       | -0.048896056 | -0.879822107 | 0.379609796 | 0.564073438 | no |
| PRH2         | -0.048886972 | -0.879658267 | 0.379698439 | 0.564166148 | no |
| HMX3         | 0.048877964  | 0.879495796  | 0.379786355 | 0.564257764 | no |
| GJD4         | -0.048873728 | -0.879419389 | 0.379827704 | 0.564267533 | no |
| CCDC79       | -0.048871911 | -0.879386613 | 0.379845442 | 0.564267533 | no |
| KIAA1683     | -0.048867972 | -0.879315562 | 0.379883896 | 0.564285652 | no |
| HIST1H2BI    | 0.04885655   | 0.879109544  | 0.379995411 | 0.564412287 | no |
| PPP1R15B     | -0.048852122 | -0.879029678 | 0.380038647 | 0.564437496 | no |
| KIF14        | 0.048832232  | 0.87867094   | 0.380232889 | 0.564686961 | no |
| ATF4         | 0.048824389  | 0.878529483  | 0.380309499 | 0.564761709 | no |
| SWSAP1       | 0.048796982  | 0.878035152  | 0.380577293 | 0.565080182 | no |
| HIBCH        | -0.048794762 | -0.877995109 | 0.380598991 | 0.565080182 | no |
| DEFB109P1    | -0.048790591 | -0.877919871 | 0.380639761 | 0.565080182 | no |
| ETV3L        | 0.048789684  | 0.877903513  | 0.380648625 | 0.565080182 | no |
| DDR1         | -0.048786838 | -0.877852183 | 0.380676442 | 0.565080182 | no |
| KCNMA1       | 0.048786298  | 0.877842442  | 0.380681722 | 0.565080182 | no |
| CRYM-AS1     | -0.048782586 | -0.877775487 | 0.380718008 | 0.565095014 | no |
| C9orf163     | -0.048779455 | -0.877719013 | 0.380748616 | 0.565101416 | no |
| RANBP10      | 0.048773012  | 0.8776028    | 0.380811606 | 0.565113395 | no |
| C9orf91      | -0.048772049 | -0.877585435 | 0.380821019 | 0.565113395 | no |
| SCAMP3       | 0.04877056   | 0.877558586  | 0.380835573 | 0.565113395 | no |

|              |              |              |             |             |    |
|--------------|--------------|--------------|-------------|-------------|----|
| ATF6B        | -0.048764827 | -0.877455183 | 0.380891628 | 0.565157552 | no |
| LOC100499405 | 0.048746208  | 0.877119352  | 0.381073717 | 0.565388695 | no |
| LATS1        | 0.048715954  | 0.876573688  | 0.381369692 | 0.565788765 | no |
| SNORA32      | -0.048701324 | -0.876309811 | 0.381512873 | 0.565962115 | no |
| SRRM2-AS1    | -0.048695188 | -0.876199139 | 0.381572934 | 0.566012143 | no |
| PCDHGB8P     | -0.04868062  | -0.875936395 | 0.381715547 | 0.566184611 | no |
| TAC1         | -0.04867511  | -0.875837017 | 0.381769497 | 0.566225552 | no |
| NSUN2        | 0.048663678  | 0.875630827  | 0.381881446 | 0.566352506 | no |
| C6orf15      | -0.048653778 | -0.875452265 | 0.381978412 | 0.566457221 | no |
| SMC6         | 0.048649088  | 0.875367671  | 0.382024354 | 0.566486262 | no |
| ATAD2        | -0.04864538  | -0.875300797 | 0.382060676 | 0.566501034 | no |
| TMEM165      | 0.048628329  | 0.874993265  | 0.382227733 | 0.566681565 | no |
| ZSCAN4       | -0.048627571 | -0.874979584 | 0.382235166 | 0.566681565 | no |
| CTC1         | -0.048616041 | -0.874771624 | 0.382348162 | 0.566809985 | no |
| MAP4K2       | 0.048603018  | 0.874536754  | 0.382475803 | 0.566943685 | no |
| NUDT9P1      | -0.048601457 | -0.874508588 | 0.382491112 | 0.566943685 | no |
| HEY2         | -0.048581948 | -0.87415672  | 0.382682391 | 0.567156029 | no |
| BOLL         | -0.048581462 | -0.874147964 | 0.382687151 | 0.567156029 | no |
| SFRP1        | -0.048568883 | -0.873921084 | 0.382810518 | 0.56729974  | no |
| C1orf105     | -0.048563098 | -0.873816747 | 0.382867259 | 0.567312135 | no |
| GOLGA6L10    | 0.048562648  | 0.873808624  | 0.382871677 | 0.567312135 | no |
| DHX34        | 0.048539773  | 0.873396057  | 0.383096096 | 0.567605528 | no |
| TRIM4        | 0.048534619  | 0.873303094  | 0.383146674 | 0.567641333 | no |
| SNORD114-4   | -0.048522824 | -0.873090366 | 0.38326243  | 0.567740536 | no |
| MKRN7P       | -0.048522412 | -0.873082944 | 0.38326647  | 0.567740536 | no |
| LOC643387    | -0.048513576 | -0.872923572 | 0.383353206 | 0.567829882 | no |
| CHMP7        | -0.048508867 | -0.872838652 | 0.383399429 | 0.567859209 | no |
| MIR133B      | 0.04850226   | 0.872719483  | 0.383464298 | 0.567916148 | no |
| LOC644145    | -0.048492492 | -0.872543315 | 0.383560207 | 0.568006878 | no |
| CXorf66      | -0.048490638 | -0.872509864 | 0.38357842  | 0.568006878 | no |
| FER1L6       | 0.048482151  | 0.872356792  | 0.38366177  | 0.56809116  | no |
| UBALD2       | 0.048469552  | 0.872129559  | 0.383785521 | 0.568235249 | no |
| C4orf40      | -0.048458099 | -0.871923009 | 0.38389803  | 0.568362673 | no |
| PPT2         | -0.04843755  | -0.871552387 | 0.384099961 | 0.56862246  | no |
| ARID4B       | -0.048432175 | -0.871455451 | 0.384152787 | 0.568637383 | no |
| NSA2         | -0.048429062 | -0.871399308 | 0.384183384 | 0.568637383 | no |
| FIZ1         | -0.048428448 | -0.871388236 | 0.384189419 | 0.568637383 | no |
| C9orf53      | -0.048418064 | -0.871200945 | 0.384291502 | 0.568749306 | no |
| YWHAH        | -0.048414074 | -0.871128987 | 0.384330727 | 0.56876819  | no |
| DACT1        | 0.048410597  | 0.871066274  | 0.384364916 | 0.568776654 | no |
| DFNB31       | 0.048408109  | 0.871021403  | 0.384389378 | 0.568776654 | no |
| CCP110       | -0.0483974   | -0.870828269 | 0.38449468  | 0.568893299 | no |
| CXCL6        | 0.048371474  | 0.870360671  | 0.384749702 | 0.569231436 | no |
| BNIP3L       | -0.048352299 | -0.870014851 | 0.384938374 | 0.56947137  | no |
| TLL1         | -0.048339828 | -0.869789928 | 0.385061118 | 0.569613745 | no |
| F13B         | -0.048316633 | -0.869371586 | 0.385289477 | 0.569912324 | no |
| ASTL         | 0.048312362  | 0.869294571  | 0.385331527 | 0.569935295 | no |
| TMEM72       | -0.048294962 | -0.868980759 | 0.385502893 | 0.570149519 | no |
| FLJ26850     | 0.048266403  | 0.868465688  | 0.385784263 | 0.570526397 | no |
| EVPL         | -0.048246267 | -0.868102536 | 0.38598272  | 0.570780612 | no |
| RAG2         | 0.048241142  | 0.868010088  | 0.386033251 | 0.570816059 | no |

|              |              |              |             |             |    |
|--------------|--------------|--------------|-------------|-------------|----|
| GPR135       | -0.048233413 | -0.867870712 | 0.386109441 | 0.570889439 | no |
| RFNG         | -0.048228045 | -0.86777389  | 0.386162373 | 0.570928424 | no |
| ENY2         | 0.048216054  | 0.867557627  | 0.386280622 | 0.571030294 | no |
| SRP54        | 0.048215217  | 0.867542531  | 0.386288876 | 0.571030294 | no |
| RFX3         | -0.048210689 | -0.867460868 | 0.386333534 | 0.571030294 | no |
| KLF16        | 0.048210281  | 0.867453509  | 0.386337558 | 0.571030294 | no |
| TMEM74       | -0.048174141 | -0.866801737 | 0.3866941   | 0.571514675 | no |
| HIST1H2AE    | 0.048170318  | 0.86673279   | 0.386731827 | 0.571514675 | no |
| NKX2-1       | -0.048166796 | -0.866669261 | 0.386766593 | 0.571514675 | no |
| MAGEB18      | -0.048166284 | -0.866660028 | 0.386771646 | 0.571514675 | no |
| NENF         | 0.048149177  | 0.866351509  | 0.386940507 | 0.571724883 | no |
| AZI2         | -0.048135561 | -0.866105952 | 0.387074939 | 0.571824355 | no |
| SLC22A5      | -0.048133407 | -0.8660671   | 0.387096212 | 0.571824355 | no |
| EME1         | -0.048132399 | -0.866048918 | 0.387106167 | 0.571824355 | no |
| BLVRA        | 0.04813158   | 0.86603414   | 0.387114259 | 0.571824355 | no |
| OXSM         | -0.048118432 | -0.865797031 | 0.387244102 | 0.571976838 | no |
| RPL27        | -0.048111136 | -0.865665441 | 0.387316173 | 0.572043974 | no |
| EPHX4        | -0.048096856 | -0.865407905 | 0.387457248 | 0.57221301  | no |
| TACO1        | -0.048089735 | -0.865279478 | 0.387527611 | 0.572277598 | no |
| ALAD         | 0.048077844  | 0.865065036  | 0.387645117 | 0.572402471 | no |
| ARMC12       | -0.048075788 | -0.865027951 | 0.38766544  | 0.572402471 | no |
| LOC100129138 | -0.048067103 | -0.86487133  | 0.387751278 | 0.572489882 | no |
| GRM4         | -0.048058928 | -0.86472389  | 0.387832096 | 0.572569869 | no |
| FOXP4        | -0.048051335 | -0.864586943 | 0.387907171 | 0.572641367 | no |
| C17orf72     | 0.048042016  | 0.864418892  | 0.38799931  | 0.572738043 | no |
| LINC00331    | -0.048036273 | -0.864315311 | 0.388056108 | 0.572760049 | no |
| KRTAP4-4     | -0.048035119 | -0.8642945   | 0.38806752  | 0.572760049 | no |
| NUP214       | -0.048014016 | -0.863913917 | 0.388276258 | 0.573028778 | no |
| R3HDM2       | -0.047994413 | -0.863560393 | 0.388470216 | 0.573243524 | no |
| KRT40        | -0.047993918 | -0.863551466 | 0.388475114 | 0.573243524 | no |
| SLX1A-SULT1A | 0.04798791   | 0.863443114  | 0.388534573 | 0.573251554 | no |
| ZNF543       | -0.047987209 | -0.86343047  | 0.388541512 | 0.573251554 | no |
| RPL18        | -0.047985283 | -0.863395728 | 0.388560578 | 0.573251554 | no |
| ZC3H3        | -0.047974588 | -0.863202848 | 0.38866644  | 0.573368373 | no |
| C10orf137    | -0.047962335 | -0.862981887 | 0.388787736 | 0.573507944 | no |
| PDDC1        | -0.047958855 | -0.862919126 | 0.388822193 | 0.573519406 | no |
| RNU6-79      | -0.047950842 | -0.862774616 | 0.388901538 | 0.573597074 | no |
| ZNF35        | 0.047938992  | 0.862560907  | 0.389018896 | 0.573730792 | no |
| ZNRF2P1      | -0.047922307 | -0.862260004 | 0.389184173 | 0.573935159 | no |
| LOC100507424 | -0.047917116 | -0.862166388 | 0.389235603 | 0.573971617 | no |
| RERG         | 0.047914281  | 0.862115263  | 0.38926369  | 0.573973652 | no |
| CNOT3        | 0.047897413  | 0.861811053  | 0.389430849 | 0.574180733 | no |
| INHBC        | -0.047893416 | -0.861738982 | 0.389470457 | 0.574199739 | no |
| AMOTL1       | -0.047885003 | -0.861587247 | 0.389553854 | 0.574283295 | no |
| C6orf58      | -0.047865023 | -0.861226931 | 0.389751937 | 0.574535899 | no |
| GYPB         | -0.047844707 | -0.860860552 | 0.389953415 | 0.574786921 | no |
| ALG1L2       | -0.047841254 | -0.860798279 | 0.389987667 | 0.574786921 | no |
| LOC654342    | -0.047839763 | -0.860771383 | 0.390002461 | 0.574786921 | no |
| NLRP14       | -0.047826771 | -0.860537094 | 0.390131344 | 0.574937441 | no |
| SCARNA1      | -0.047816837 | -0.860357934 | 0.390229918 | 0.575043278 | no |
| ALG13        | 0.047808548  | 0.860208462  | 0.390312169 | 0.575068325 | no |

|              |              |              |             |             |    |
|--------------|--------------|--------------|-------------|-------------|----|
| UNCX         | -0.04780749  | -0.860189382 | 0.390322669 | 0.575068325 | no |
| DEFB136      | -0.047807035 | -0.860181165 | 0.390327191 | 0.575068325 | no |
| IVL          | -0.047798672 | -0.860030348 | 0.390410195 | 0.575139911 | no |
| HMGB3P1      | -0.047796302 | -0.859987618 | 0.390433714 | 0.575139911 | no |
| DNAJC19      | 0.047794051  | 0.859947012  | 0.390456065 | 0.575139911 | no |
| LOC100129250 | 0.047786894  | 0.859817947  | 0.390527111 | 0.575205136 | no |
| TDRD5        | -0.047774128 | -0.859587724 | 0.390653861 | 0.575352394 | no |
| TMC7         | 0.047749346  | 0.859140811  | 0.390899982 | 0.575675428 | no |
| OLAH         | 0.047743532  | 0.859035964  | 0.390957737 | 0.575721032 | no |
| ATP10A       | -0.047708548 | -0.858405075 | 0.391305369 | 0.576193469 | no |
| PTK2B        | 0.047684274  | 0.857967321  | 0.391546691 | 0.576509313 | no |
| GABPB1       | 0.047673965  | 0.857781413  | 0.391649204 | 0.576586653 | no |
| MYL2         | 0.047673596  | 0.857774755  | 0.391652876 | 0.576586653 | no |
| CCDC171      | -0.047665373 | -0.857626458 | 0.391734662 | 0.576667554 | no |
| PIWIL1       | -0.04765483  | -0.857436345 | 0.391839525 | 0.576782413 | no |
| LOC401497    | 0.047646767  | 0.857290938  | 0.39191974  | 0.576860978 | no |
| KIF20A       | 0.047641187  | 0.857190311  | 0.391975258 | 0.576903183 | no |
| DHX37        | 0.047630043  | 0.856989334  | 0.392086155 | 0.577026882 | no |
| CRYBB3       | -0.047617231 | -0.856758285 | 0.39221367  | 0.577175019 | no |
| COPS7A       | -0.047604713 | -0.856532552 | 0.392338275 | 0.577273768 | no |
| PRIM1        | -0.047600879 | -0.856463418 | 0.392376442 | 0.577273768 | no |
| LOC100505658 | -0.047600263 | -0.856452299 | 0.392382581 | 0.577273768 | no |
| RPL23A       | -0.047599697 | -0.856442086 | 0.392388219 | 0.577273768 | no |
| THADA        | -0.047596101 | -0.856377253 | 0.392424014 | 0.577286911 | no |
| OR1K1        | -0.047553017 | -0.855600287 | 0.392853142 | 0.577878636 | no |
| GSTM2        | -0.047548493 | -0.855518716 | 0.392898211 | 0.577905376 | no |
| LOC729609    | -0.047542103 | -0.855403481 | 0.392961886 | 0.577953458 | no |
| POC1A        | -0.047539815 | -0.855362221 | 0.392984686 | 0.577953458 | no |
| C1orf114     | 0.047531302  | 0.855208696  | 0.393069531 | 0.578038681 | no |
| LINC00534    | -0.047478699 | -0.854260107 | 0.393594011 | 0.578751161 | no |
| SHOX         | -0.047476198 | -0.854214993 | 0.393618965 | 0.578751161 | no |
| TAS2R43      | -0.047474609 | -0.854186348 | 0.393634811 | 0.578751161 | no |
| PNOC         | -0.047465699 | -0.854025677 | 0.393723694 | 0.578823212 | no |
| CXorf28      | 0.047462144  | 0.853961558  | 0.393759168 | 0.578823212 | no |
| DLGAP4       | -0.047461598 | -0.853951712 | 0.393764616 | 0.578823212 | no |
| NAP1L4       | -0.047457692 | -0.853881276 | 0.393803587 | 0.578840907 | no |
| C11orf16     | -0.047434932 | -0.853470842 | 0.394030724 | 0.579108363 | no |
| AKAP17A      | 0.047432017  | 0.853418277  | 0.39405982  | 0.579108363 | no |
| ABI3BP       | 0.047431359  | 0.853406414  | 0.394066386 | 0.579108363 | no |
| SLC39A5      | -0.047419604 | -0.85319444  | 0.394183732 | 0.579214943 | no |
| MACC1-AS1    | -0.047418694 | -0.853178036 | 0.394192814 | 0.579214943 | no |
| WDR43        | 0.047414273  | 0.8530983    | 0.39423696  | 0.579240208 | no |
| CHST10       | -0.047408756 | -0.852998812 | 0.394292047 | 0.579281541 | no |
| C6orf47      | 0.047400228  | 0.852845026  | 0.394377208 | 0.57936705  | no |
| EXOC2        | -0.047397033 | -0.852787416 | 0.394409113 | 0.579374316 | no |
| CDRT7        | -0.047379007 | -0.852462345 | 0.394589171 | 0.579599198 | no |
| SDK1         | 0.047367727  | 0.852258943  | 0.394701861 | 0.579725102 | no |
| XKR9         | -0.047344403 | -0.85183835  | 0.394934943 | 0.580027805 | no |
| TRIM77       | -0.047332798 | -0.851629074 | 0.39505095  | 0.580158533 | no |
| MRPL16       | -0.047326815 | -0.851521185 | 0.395110764 | 0.580206725 | no |
| ORC3         | -0.047312548 | -0.851263914 | 0.395253417 | 0.580376549 | no |



|             |              |              |             |             |    |
|-------------|--------------|--------------|-------------|-------------|----|
| SCARNA22    | -0.047304354 | -0.851116148 | 0.395335365 | 0.58045722  | no |
| C1orf228    | 0.047294355  | 0.850935839  | 0.395435375 | 0.580564397 | no |
| GRK6        | 0.047288392  | 0.850828321  | 0.395495018 | 0.580612299 | no |
| RNU6-53     | -0.047284001 | -0.850749139 | 0.395538946 | 0.580637123 | no |
| JOSD1       | 0.047273764  | 0.850564531  | 0.395641372 | 0.580747813 | no |
| LOC728342   | -0.047260753 | -0.850329917 | 0.395771567 | 0.58081452  | no |
| ZNF674      | -0.047259825 | -0.850313175 | 0.395780859 | 0.58081452  | no |
| SSU72       | 0.047258936  | 0.850297149  | 0.395789754 | 0.58081452  | no |
| CLRN1       | -0.04725842  | -0.850287838 | 0.395794921 | 0.58081452  | no |
| TWIST2      | 0.047230097  | 0.849777113  | 0.396078439 | 0.581165108 | no |
| CAP2        | -0.047229151 | -0.849760051 | 0.396087913 | 0.581165108 | no |
| ARHGEF3-AS1 | -0.047225443 | -0.849693185 | 0.396125041 | 0.581179906 | no |
| LOC649395   | 0.047221003  | 0.84961312   | 0.396169502 | 0.581205459 | no |
| ZFYVE26     | 0.047200295  | 0.849239708  | 0.396376901 | 0.581470032 | no |
| LOC284551   | 0.047193222  | 0.849112161  | 0.396447757 | 0.581534281 | no |
| TRIML1      | -0.047189349 | -0.849042326 | 0.396486556 | 0.581551499 | no |
| MRPL40      | -0.04716406  | -0.848586293 | 0.396739975 | 0.581883491 | no |
| ZDHHC16     | -0.047159212 | -0.84849887  | 0.396788567 | 0.581915047 | no |
| LOC284865   | -0.047156208 | -0.848444717 | 0.396818669 | 0.581919482 | no |
| MIR221      | 0.047152091  | 0.848370464  | 0.396859946 | 0.581940304 | no |
| OR10H1      | -0.04714673  | -0.848273799 | 0.396913685 | 0.581979396 | no |
| PPP1R12C    | 0.047135432  | 0.848070063  | 0.397026964 | 0.582071297 | no |
| RPS28       | -0.047135076 | -0.848063648 | 0.397030531 | 0.582071297 | no |
| SF3B3       | -0.047113524 | -0.847675016 | 0.397246668 | 0.582327536 | no |
| LRRC38      | -0.047109485 | -0.847602192 | 0.397287177 | 0.582327536 | no |
| OR4F5       | -0.047107732 | -0.84757058  | 0.397304762 | 0.582327536 | no |
| OAZ3        | 0.047105732  | 0.847534513  | 0.397324826 | 0.582327536 | no |
| FRMD3       | 0.04710414   | 0.847505812  | 0.397340793 | 0.582327536 | no |
| FAM81B      | 0.047100959  | 0.847444839  | 0.397372712 | 0.582334602 | no |
| GPR89C      | -0.047096414 | -0.847366483 | 0.397418309 | 0.582361713 | no |
| IFNL1       | -0.04708058  | -0.847080972 | 0.397577183 | 0.582554799 | no |
| ATIC        | -0.047076875 | -0.84701415  | 0.397614372 | 0.582569571 | no |
| OR7A5       | -0.047070417 | -0.846897714 | 0.397679178 | 0.582616546 | no |
| ZNF30       | -0.047068278 | -0.846859133 | 0.397700653 | 0.582616546 | no |
| LOC339874   | 0.047060091  | 0.846711514  | 0.397782826 | 0.582660728 | no |
| LMNB2       | -0.047059871 | -0.846707545 | 0.397785036 | 0.582660728 | no |
| DLX5        | -0.04704906  | -0.846512603 | 0.397893569 | 0.582736596 | no |
| IFT52       | 0.047047168  | 0.846478479  | 0.397912569 | 0.582736596 | no |
| NIT1        | -0.047046609 | -0.846468407 | 0.397918177 | 0.582736596 | no |
| SLC10A6     | 0.047039432  | 0.846338979  | 0.397990248 | 0.582802427 | no |
| SPRY4       | 0.04703397   | 0.84624049   | 0.398045096 | 0.58284303  | no |
| RNU6-33     | -0.047026107 | -0.846098707 | 0.398124062 | 0.582918941 | no |
| LINC00351   | 0.047018134  | 0.845954944  | 0.398204141 | 0.58299647  | no |
| DEFB119     | -0.047004189 | -0.845703475 | 0.398344237 | 0.583161852 | no |
| TRIM28      | -0.046994061 | -0.845520848 | 0.398445999 | 0.583232568 | no |
| CST4        | 0.046989947  | 0.845446666  | 0.398487339 | 0.583232568 | no |
| AKAP4       | 0.046988918  | 0.845428125  | 0.398497672 | 0.583232568 | no |
| TNNI1       | -0.046988578 | -0.845421983 | 0.398501095 | 0.583232568 | no |
| CLPSL1      | -0.046984879 | -0.845355282 | 0.398538269 | 0.583247254 | no |
| CPSF1       | -0.046980344 | -0.845273511 | 0.398583844 | 0.583274233 | no |
| FBX038      | -0.046959049 | -0.844889518 | 0.398797907 | 0.58354775  | no |

|              |              |              |             |             |    |
|--------------|--------------|--------------|-------------|-------------|----|
| ATF7         | -0.04693767  | -0.84450403  | 0.399012872 | 0.583770883 | no |
| ALLC         | -0.046936709 | -0.844486689 | 0.399022544 | 0.583770883 | no |
| SHMT2        | -0.04693578  | -0.844469938 | 0.399031887 | 0.583770883 | no |
| LINC00839    | -0.046932652 | -0.844413532 | 0.399063348 | 0.583777171 | no |
| NPY6R        | -0.046916314 | -0.844118934 | 0.399227689 | 0.583913805 | no |
| TSPAN19      | 0.046914668  | 0.844089254  | 0.399244248 | 0.583913805 | no |
| LOC100133461 | -0.046912876 | -0.844056944 | 0.399262276 | 0.583913805 | no |
| GABPA        | -0.046910464 | -0.844013451 | 0.399286543 | 0.583913805 | no |
| BCL6         | 0.046909862  | 0.844002594  | 0.399292601 | 0.583913805 | no |
| MICAL1       | -0.046906912 | -0.843949395 | 0.399322285 | 0.583917481 | no |
| CPS1         | -0.04689423  | -0.843720724 | 0.399449895 | 0.584064341 | no |
| C9orf72      | 0.046867811  | 0.843244345  | 0.399715818 | 0.584404733 | no |
| SCAMP5       | 0.046865674  | 0.843205814  | 0.399737332 | 0.584404733 | no |
| LEAP2        | -0.046859792 | -0.843099761 | 0.399796549 | 0.584404733 | no |
| NAA40        | -0.04685622  | -0.843035342 | 0.399832521 | 0.584404733 | no |
| HSPA1B       | 0.046854045  | 0.842996133  | 0.399854417 | 0.584404733 | no |
| SSR2         | 0.046848804  | 0.842901629  | 0.399907195 | 0.584404733 | no |
| ZNF668       | -0.046848285 | -0.842892258 | 0.399912428 | 0.584404733 | no |
| LOC100506035 | -0.046847709 | -0.842881885 | 0.399918222 | 0.584404733 | no |
| ACTA1        | -0.046846795 | -0.842865397 | 0.39992743  | 0.584404733 | no |
| MYOT         | -0.046799016 | -0.842003875 | 0.400408773 | 0.585068326 | no |
| TPPP3        | 0.046791871  | 0.841875044  | 0.400480783 | 0.585133762 | no |
| GPR87        | 0.046784633  | 0.841744534  | 0.400553738 | 0.585164977 | no |
| UBXN2A       | 0.046784349  | 0.841739408  | 0.400556604 | 0.585164977 | no |
| BANCR        | -0.046767609 | -0.841437564 | 0.400725368 | 0.585371729 | no |
| PBX3         | 0.046764282  | 0.841377569  | 0.400758917 | 0.585380947 | no |
| UGT2B4       | -0.046761205 | -0.841322095 | 0.400789939 | 0.585386474 | no |
| LOC401109    | -0.04674638  | -0.841054767 | 0.400939456 | 0.585531627 | no |
| NCKAP5L      | -0.046745948 | -0.841046982 | 0.40094381  | 0.585531627 | no |
| HRAS         | -0.046722107 | -0.840617104 | 0.401184313 | 0.58584091  | no |
| PEBP4        | -0.04671955  | -0.840570999 | 0.401210112 | 0.58584091  | no |
| CORO7        | -0.046706806 | -0.840341207 | 0.401338713 | 0.585988877 | no |
| SLC6A3       | 0.046686424  | 0.839973696  | 0.40154444  | 0.586249427 | no |
| EBF1         | 0.046683281  | 0.839917022  | 0.401576171 | 0.586255926 | no |
| LOC442028    | 0.046677727  | 0.83981688   | 0.401632243 | 0.586297957 | no |
| LINC00200    | -0.046659833 | -0.839494239 | 0.401812928 | 0.58652188  | no |
| LOC100506746 | 0.046647803  | 0.839277323  | 0.401934433 | 0.586643463 | no |
| SAG          | -0.046646181 | -0.839248078 | 0.401950816 | 0.586643463 | no |
| AP3D1        | -0.046638732 | -0.839113764 | 0.402026065 | 0.586713443 | no |
| SFT2D3       | -0.046628627 | -0.838931559 | 0.402128158 | 0.586822587 | no |
| MYH13        | -0.046609805 | -0.838592169 | 0.402318366 | 0.587060293 | no |
| DDX18        | -0.046596301 | -0.838348685 | 0.402454858 | 0.587182103 | no |
| ZNF616       | -0.04659614  | -0.838345778 | 0.402456488 | 0.587182103 | no |
| LOH12CR1     | -0.046583041 | -0.838109603 | 0.402588909 | 0.587335432 | no |
| CABYR        | -0.046577605 | -0.838011591 | 0.402643871 | 0.587375742 | no |
| HPVC1        | 0.046551677  | 0.837544075  | 0.402906102 | 0.58771839  | no |
| SIRPA        | -0.046530149 | -0.837155907 | 0.403123906 | 0.58796946  | no |
| FLJ43663     | -0.046527731 | -0.837112313 | 0.403148371 | 0.58796946  | no |
| TAAR5        | -0.046526552 | -0.837091061 | 0.403160298 | 0.58796946  | no |
| PDX1         | -0.046515862 | -0.836898304 | 0.403268487 | 0.588063906 | no |
| MEN1         | -0.046514745 | -0.836878178 | 0.403279784 | 0.588063906 | no |

|            |              |              |             |             |    |
|------------|--------------|--------------|-------------|-------------|----|
| PUS1       | -0.04650406  | -0.836685515 | 0.40338794  | 0.58818171  | no |
| LSM14A     | -0.04649994  | -0.836611225 | 0.403429649 | 0.588202618 | no |
| SLC7A6     | 0.046486754  | 0.836373475  | 0.403563147 | 0.5883428   | no |
| ATXN8OS    | -0.046480809 | -0.836266285 | 0.403623344 | 0.5883428   | no |
| DICER1     | -0.046479709 | -0.836246456 | 0.403634481 | 0.5883428   | no |
| HNRNPKP3   | 0.046479628  | 0.836244996  | 0.403635301 | 0.5883428   | no |
| RHBDD1     | 0.046473537  | 0.836135169  | 0.403696985 | 0.588392805 | no |
| DUXA       | -0.046464846 | -0.83597846  | 0.403785011 | 0.588481192 | no |
| KDM4C      | 0.046461264  | 0.835913867  | 0.403821296 | 0.588482222 | no |
| FBP2       | -0.04645937  | -0.835879716 | 0.403840482 | 0.588482222 | no |
| PDE7A      | 0.046454187  | 0.835786267  | 0.403892984 | 0.588518823 | no |
| PCDHB6     | -0.046437388 | -0.835483378 | 0.40406318  | 0.588713835 | no |
| KIR2DS4    | 0.04643557   | 0.835450593  | 0.404081605 | 0.588713835 | no |
| MED26      | -0.046426938 | -0.835294962 | 0.404169075 | 0.588801355 | no |
| HCRT       | -0.046399923 | -0.834807869 | 0.404442912 | 0.589133855 | no |
| KRTAP4-3   | -0.046395344 | -0.834725302 | 0.404489341 | 0.589133855 | no |
| SLC38A9    | 0.046394579  | 0.834711513  | 0.404497095 | 0.589133855 | no |
| KAL1       | -0.046393606 | -0.834693964 | 0.404506964 | 0.589133855 | no |
| LINC00272  | 0.046364856  | 0.834175596  | 0.404798533 | 0.589518552 | no |
| SMG7       | -0.046359642 | -0.834081586 | 0.404851425 | 0.589555628 | no |
| SYNE3      | -0.046352075 | -0.833945155 | 0.404928191 | 0.589627465 | no |
| ABCB11     | 0.046343079  | 0.833782943  | 0.405019475 | 0.589720429 | no |
| TBCK       | -0.046338657 | -0.833703219 | 0.405064343 | 0.589745803 | no |
| RHOV       | -0.046335502 | -0.833646336 | 0.405096359 | 0.589752462 | no |
| C12orf71   | -0.046319925 | -0.833365474 | 0.405254459 | 0.589942667 | no |
| DCTPP1     | -0.046316199 | -0.833298293 | 0.405292282 | 0.589957764 | no |
| SLC01B3    | 0.046303633  | 0.833071726  | 0.405419853 | 0.590012327 | no |
| GDEP       | -0.046301975 | -0.833041842 | 0.405436682 | 0.590012327 | no |
| C8orf31    | -0.04630191  | -0.833040669 | 0.405437342 | 0.590012327 | no |
| ZCCHC5     | 0.046299991  | 0.833006061  | 0.405456831 | 0.590012327 | no |
| AGBL5      | 0.046298986  | 0.832987942  | 0.405467035 | 0.590012327 | no |
| HKR1       | -0.046292231 | -0.83286615  | 0.405535626 | 0.590061398 | no |
| CHEK1      | 0.046290257  | 0.832830561  | 0.40555567  | 0.590061398 | no |
| DNAJB8-AS1 | 0.046262255  | 0.832325675  | 0.405840097 | 0.590435251 | no |
| KRT35      | -0.04625577  | -0.832208753 | 0.405905982 | 0.590491129 | no |
| ALDH7A1    | -0.046250447 | -0.832112778 | 0.405960068 | 0.590529837 | no |
| SMAD7      | -0.046237705 | -0.83188305  | 0.406089547 | 0.590678203 | no |
| METTL8     | 0.046230569  | 0.831754385  | 0.406162076 | 0.590743717 | no |
| DKK4       | 0.046222953  | 0.831617071  | 0.406239489 | 0.590816013 | no |
| POLR2J     | -0.04622027  | -0.831568692 | 0.406266765 | 0.590816013 | no |
| CIB3       | -0.046204477 | -0.831283948 | 0.406427329 | 0.590987131 | no |
| ADAM5      | 0.046203287  | 0.83126249   | 0.40643943  | 0.590987131 | no |
| UBE2I      | 0.046177725  | 0.830801617  | 0.406699396 | 0.591266358 | no |
| MEX3C      | -0.046177568 | -0.830798788 | 0.406700992 | 0.591266358 | no |
| C8orf86    | -0.04617629  | -0.830775733 | 0.406714    | 0.591266358 | no |
| SPTA1      | 0.046171586  | 0.830690928  | 0.406761848 | 0.59127871  | no |
| RPS6KC1    | -0.046170045 | -0.830663149 | 0.406777522 | 0.59127871  | no |
| RRP1B      | 0.046160072  | 0.830483339  | 0.406878987 | 0.591386197 | no |
| THOC2      | -0.046151247 | -0.830324218 | 0.406968789 | 0.591446901 | no |
| LOC284798  | -0.046150559 | -0.830311808 | 0.406975793 | 0.591446901 | no |
| ANKRD30BP2 | -0.046130193 | -0.829944619 | 0.407183071 | 0.591708119 | no |

|              |              |              |             |             |    |
|--------------|--------------|--------------|-------------|-------------|----|
| KRT77        | -0.046119326 | -0.829748685 | 0.4072937   | 0.591828865 | no |
| SDCBP2       | -0.046104299 | -0.829477755 | 0.407446705 | 0.592011165 | no |
| LOC100652770 | 0.046097539  | 0.829355875  | 0.407515547 | 0.592071161 | no |
| HES3         | -0.046089291 | -0.829207172 | 0.407599548 | 0.592153173 | no |
| C17orf53     | -0.046074964 | -0.828948855 | 0.407745494 | 0.59232516  | no |
| ADAD1        | -0.046071845 | -0.828892621 | 0.40777727  | 0.592331282 | no |
| NCOA4        | -0.046063172 | -0.828736256 | 0.407865634 | 0.592417452 | no |
| MIB2         | -0.046059187 | -0.828664401 | 0.407906244 | 0.592417452 | no |
| RBMXL2       | -0.046057906 | -0.828641319 | 0.40791929  | 0.592417452 | no |
| NPY5R        | 0.046044101  | 0.828392405  | 0.408059989 | 0.592581744 | no |
| SNORA80B     | -0.046035926 | -0.828245024 | 0.40814331  | 0.592626515 | no |
| DSC1         | 0.046035665  | 0.82824032   | 0.40814597  | 0.592626515 | no |
| GOLGA8EP     | -0.046029033 | -0.828120738 | 0.408213583 | 0.59265948  | no |
| DID01        | -0.046028028 | -0.82810262  | 0.408223828 | 0.59265948  | no |
| MST1R        | -0.046024996 | -0.828047966 | 0.408254732 | 0.59266431  | no |
| SLC30A8      | -0.046020736 | -0.827971146 | 0.408298173 | 0.592687338 | no |
| KIR2DS5      | -0.046003575 | -0.827661758 | 0.408473157 | 0.592901194 | no |
| NSD1         | -0.046000877 | -0.827613113 | 0.408500674 | 0.592901194 | no |
| POU4F1       | -0.045987273 | -0.82736784  | 0.408639433 | 0.593062537 | no |
| ARL6IP1      | -0.045980335 | -0.827242757 | 0.408710207 | 0.593086294 | no |
| KIF25        | -0.045980258 | -0.827241363 | 0.408710996 | 0.593086294 | no |
| GPR107       | 0.045971869  | 0.827090118  | 0.408796584 | 0.59317044  | no |
| PITPNC1      | -0.045968494 | -0.827029258 | 0.408831027 | 0.593175228 | no |
| PIK3R4       | -0.045966136 | -0.826986747 | 0.408855086 | 0.593175228 | no |
| IGSF5        | 0.04595877   | 0.826853951  | 0.408930248 | 0.593244226 | no |
| SNORA55      | -0.045929871 | -0.826332922 | 0.409225231 | 0.593598512 | no |
| LHFPL3-AS1   | 0.045926417  | 0.826270646  | 0.409260498 | 0.593598512 | no |
| ZSCAN22      | -0.045925445 | -0.826253115 | 0.409270426 | 0.593598512 | no |
| G3BP1        | -0.045924023 | -0.826227477 | 0.409284945 | 0.593598512 | no |
| PRKCQ-AS1    | -0.045920289 | -0.826160165 | 0.409323066 | 0.59361374  | no |
| MED10        | 0.045916131  | 0.82608519   | 0.40936553  | 0.593635264 | no |
| UHRF1BP1     | -0.045909183 | -0.825959938 | 0.409436476 | 0.593698084 | no |
| FBXL2        | -0.045904697 | -0.825879056 | 0.409482293 | 0.59372446  | no |
| CCDC144NL    | -0.04590172  | -0.825825377 | 0.409512702 | 0.593728495 | no |
| CYP2U1       | 0.04589505   | 0.825705129  | 0.409580827 | 0.593787207 | no |
| SEC22C       | -0.045884799 | -0.825520309 | 0.409685549 | 0.593898963 | no |
| C11orf85     | 0.045861366  | 0.825097838  | 0.409924987 | 0.594205982 | no |
| BNC1         | 0.045853984  | 0.824964736  | 0.41000044  | 0.594250834 | no |
| RFX5         | 0.045852928  | 0.824945701  | 0.410011231 | 0.594250834 | no |
| METTL4       | 0.045837074  | 0.824659867  | 0.410173297 | 0.594445636 | no |
| DNMT3L       | 0.045819581  | 0.824344497  | 0.410352154 | 0.594664743 | no |
| COPB2        | 0.045816616  | 0.824291029  | 0.410382482 | 0.594668595 | no |
| MEGF6        | 0.045807808  | 0.824132232  | 0.410472563 | 0.594722624 | no |
| ARFGEF1      | -0.045807558 | -0.824127734 | 0.410475115 | 0.594722624 | no |
| LINC00312    | 0.045797654  | 0.823949174  | 0.41057642  | 0.594829301 | no |
| LOC727915    | -0.045794322 | -0.823889102 | 0.410610505 | 0.594838583 | no |
| OR3A4P       | -0.045785767 | -0.823734863 | 0.410698029 | 0.594888612 | no |
| EXOC3L4      | 0.045785535  | 0.823730683  | 0.410700402 | 0.594888612 | no |
| RSG1         | -0.045775892 | -0.823556828 | 0.41079907  | 0.594991429 | no |
| OTX2-AS1     | -0.045766062 | -0.823379595 | 0.410899671 | 0.59509703  | no |
| XIST         | -0.045756484 | -0.823206931 | 0.410997692 | 0.595165503 | no |

|              |              |              |             |             |    |
|--------------|--------------|--------------|-------------|-------------|----|
| SPRR3        | -0.045754191 | -0.823165578 | 0.41102117  | 0.595165503 | no |
| UBE2M        | -0.045753325 | -0.823149972 | 0.411030031 | 0.595165503 | no |
| CT64         | -0.045737274 | -0.822860582 | 0.411194356 | 0.595312965 | no |
| PDCD4        | 0.045737242  | 0.822860023  | 0.411194673 | 0.595312965 | no |
| SLC26A5      | -0.045734516 | -0.822810866 | 0.41122259  | 0.595312965 | no |
| LOC647859    | -0.045732555 | -0.822775505 | 0.411242673 | 0.595312965 | no |
| UBXN6        | 0.045720586  | 0.822559721  | 0.411365237 | 0.595450279 | no |
| ZCCHC11      | -0.045704351 | -0.82226704  | 0.411531511 | 0.595650843 | no |
| HIBADH       | 0.045695109  | 0.822100405  | 0.411626197 | 0.595747767 | no |
| ZNF446       | -0.045679877 | -0.821825797 | 0.411782262 | 0.595933508 | no |
| OR5K2        | -0.045672904 | -0.821700077 | 0.411853723 | 0.595977155 | no |
| CEP63        | -0.045671522 | -0.821675165 | 0.411867885 | 0.595977155 | no |
| RASA4CP      | -0.045667366 | -0.821600238 | 0.411910478 | 0.595998659 | no |
| ITGAE        | 0.045658953  | 0.821448574  | 0.411996703 | 0.596078554 | no |
| LRRC72       | -0.045653991 | -0.821359121 | 0.412047565 | 0.596078554 | no |
| ASPHD2       | -0.045653861 | -0.821356766 | 0.412048904 | 0.596078554 | no |
| FFAR1        | -0.045639375 | -0.821095608 | 0.412197415 | 0.596253258 | no |
| ALB          | -0.04562004  | -0.82074703  | 0.412395689 | 0.596499916 | no |
| LYPD6        | 0.045615001  | 0.820656181  | 0.412447374 | 0.596534526 | no |
| SYNJ2-IT1    | -0.045600251 | -0.820390256 | 0.412598684 | 0.596713211 | no |
| LOC100288814 | -0.045568872 | -0.819824546 | 0.412920679 | 0.597138707 | no |
| FXYD3        | -0.045560427 | -0.819672293 | 0.413007365 | 0.597223879 | no |
| FLJ43879     | 0.045557447  | 0.819618573  | 0.413037954 | 0.597227927 | no |
| TAZ          | 0.04555285   | 0.819535709  | 0.41308514  | 0.59724351  | no |
| GRIN2A       | -0.045550983 | -0.819502041 | 0.413104312 | 0.59724351  | no |
| USP17L6P     | -0.045533942 | -0.819194819 | 0.413279289 | 0.597456289 | no |
| DGCR8        | -0.045518394 | -0.818914513 | 0.413438973 | 0.597646935 | no |
| FAM124A      | -0.045511099 | -0.81878301  | 0.413513901 | 0.597677536 | no |
| SLC4A11      | 0.045510918  | 0.818779741  | 0.413515764 | 0.597677536 | no |
| SAMD12-AS1   | -0.045500233 | -0.818587103 | 0.413625539 | 0.597765871 | no |
| TBC1D3B      | 0.045499554  | 0.818574871  | 0.41363251  | 0.597765871 | no |
| HBP1         | -0.045490729 | -0.818415774 | 0.413723186 | 0.597848515 | no |
| GSTA5        | 0.045486718  | 0.818343467  | 0.4137644   | 0.597848515 | no |
| HCG4         | 0.045485867  | 0.818328114  | 0.413773152 | 0.597848515 | no |
| CGB5         | -0.04548275  | -0.81827192  | 0.413805184 | 0.597854603 | no |
| TDGF1P3      | -0.045478501 | -0.818195328 | 0.413848847 | 0.597877492 | no |
| SMC4         | -0.045466088 | -0.817971541 | 0.413976435 | 0.598021616 | no |
| SLC25A6      | -0.045452513 | -0.817726814 | 0.414115989 | 0.598144757 | no |
| ANKRD31      | -0.045452381 | -0.817724438 | 0.414117344 | 0.598144757 | no |
| CCDC106      | -0.045449072 | -0.817664772 | 0.414151372 | 0.598153706 | no |
| SERPINE3     | -0.045442104 | -0.817539155 | 0.414223019 | 0.598216982 | no |
| SPATA24      | -0.045438773 | -0.817479103 | 0.414257273 | 0.59822625  | no |
| CATSPERD     | -0.045431915 | -0.817355467 | 0.4143278   | 0.5982286   | no |
| FZD2         | 0.045427487  | 0.817275634  | 0.414373345 | 0.5982286   | no |
| KRTAP10-3    | -0.045426204 | -0.817252513 | 0.414386535 | 0.5982286   | no |
| TAS2R50      | -0.045425531 | -0.817240377 | 0.414393459 | 0.5982286   | no |
| GSTM2P1      | -0.045425082 | -0.817232275 | 0.414398082 | 0.5982286   | no |
| LINC00159    | 0.04541776   | 0.817100288  | 0.414473389 | 0.598297125 | no |
| FOXJ2        | -0.045413145 | -0.817017086 | 0.414520865 | 0.598325469 | no |
| FAM27C       | 0.045395274  | 0.816694899  | 0.414704739 | 0.598499604 | no |
| CTDP1        | 0.04539473   | 0.816685107  | 0.414710328 | 0.598499604 | no |

|           |              |              |             |             |    |
|-----------|--------------|--------------|-------------|-------------|----|
| DKK2      | 0.0453933    | 0.81665931   | 0.414725053 | 0.598499604 | no |
| HAS1      | 0.045387231  | 0.816549905  | 0.414787504 | 0.598549536 | no |
| KLHL10    | 0.045383801  | 0.816488065  | 0.414822806 | 0.598560288 | no |
| ARMCX5    | 0.045379832  | 0.816416515  | 0.414863653 | 0.598579038 | no |
| COL4A5    | 0.045374286  | 0.816316536  | 0.414920735 | 0.598621209 | no |
| VCPIP1    | -0.045362402 | -0.816102301 | 0.415043065 | 0.598757502 | no |
| CSH1      | -0.045349429 | -0.815868427 | 0.415176634 | 0.59890999  | no |
| HAX1      | -0.045342961 | -0.815751824 | 0.415243237 | 0.598965864 | no |
| SCAF8     | -0.045337201 | -0.81564798  | 0.415302557 | 0.599011225 | no |
| D21S2088E | 0.045332838  | 0.815569317  | 0.415347496 | 0.599029556 | no |
| LOC645752 | 0.045330554  | 0.815528154  | 0.415371013 | 0.599029556 | no |
| CCDC36    | 0.045317156  | 0.815286604  | 0.415509031 | 0.599188391 | no |
| MIA-RAB4B | -0.045311096 | -0.815177361 | 0.415571459 | 0.599211104 | no |
| EIF1      | 0.045310214  | 0.815161462  | 0.415580546 | 0.599211104 | no |
| NNAT      | -0.045299302 | -0.814964749 | 0.415692975 | 0.599333003 | no |
| LINC00366 | -0.045296282 | -0.814910309 | 0.415724094 | 0.59933766  | no |
| MIIP      | -0.045292526 | -0.814842593 | 0.415762802 | 0.599353259 | no |
| LINC00330 | -0.045275788 | -0.814540846 | 0.415935315 | 0.599561732 | no |
| HPCAL1    | 0.04525383   | 0.814144998  | 0.416161693 | 0.599847816 | no |
| FAM174A   | -0.045239945 | -0.813894684 | 0.41630488  | 0.600013222 | no |
| TIMP3     | -0.045237288 | -0.813846778 | 0.416332287 | 0.600013222 | no |
| STRBP     | -0.045213771 | -0.813422831 | 0.416574873 | 0.600291482 | no |
| RSPH1     | 0.045213155  | 0.813411728  | 0.416581227 | 0.600291482 | no |
| ZNF117    | -0.045210287 | -0.81336003  | 0.416610815 | 0.600293867 | no |
| FLJ42351  | 0.045182785  | 0.812864225  | 0.41689464  | 0.600625504 | no |
| AKIRIN2   | -0.045182569 | -0.81286033  | 0.41689687  | 0.600625504 | no |
| SNTN      | -0.045172709 | -0.812682582 | 0.416998651 | 0.600726451 | no |
| HAO1      | 0.04516949   | 0.812624554  | 0.417031881 | 0.600726451 | no |
| CCDC42    | 0.045167658  | 0.812591527  | 0.417050795 | 0.600726451 | no |
| UBE2Q1    | 0.045160327  | 0.812459365  | 0.417126488 | 0.600795212 | no |
| AWAT1     | -0.045138714 | -0.812069754 | 0.417349676 | 0.601076389 | no |
| NVL       | 0.045126575  | 0.811850913  | 0.417475069 | 0.601216693 | no |
| COL9A2    | -0.045105111 | -0.811463981 | 0.417696831 | 0.601495752 | no |
| HMOX2     | -0.045101686 | -0.811402238 | 0.417732225 | 0.601506415 | no |
| RABAC1    | 0.045065871  | 0.810756592  | 0.418102438 | 0.601977857 | no |
| BMX       | 0.045064593  | 0.810733553  | 0.418115652 | 0.601977857 | no |
| KRTAP10-6 | -0.045044876 | -0.810378125 | 0.418319541 | 0.602231059 | no |
| WDR66     | 0.04499649   | 0.809505867  | 0.418820155 | 0.602911377 | no |
| OGN       | 0.04498597   | 0.809316224  | 0.418929043 | 0.603027733 | no |
| OS9       | -0.044979858 | -0.809206045 | 0.418992313 | 0.603051726 | no |
| OLA1      | -0.044978939 | -0.809189469 | 0.419001832 | 0.603051726 | no |
| PRAMEF13  | -0.044976026 | -0.809136958 | 0.419031988 | 0.603054742 | no |
| TTC24     | 0.044971255  | 0.809050963  | 0.419081378 | 0.603085435 | no |
| OXCT2     | 0.044958791  | 0.808826268  | 0.419210441 | 0.603230773 | no |
| HTRA1     | 0.044955242  | 0.808762289  | 0.419247195 | 0.603243268 | no |
| LOC338817 | -0.044947683 | -0.808626025 | 0.41932548  | 0.603315517 | no |
| C1orf189  | 0.044931534  | 0.808334909  | 0.419492758 | 0.603482908 | no |
| UBA2      | -0.044931029 | -0.808325815 | 0.419497983 | 0.603482908 | no |
| SCARNA18  | -0.044928079 | -0.808272623 | 0.419528553 | 0.603486488 | no |
| SNHG5     | -0.044919736 | -0.80812224  | 0.419614984 | 0.603566629 | no |
| LOC144742 | 0.04491728   | 0.808077962  | 0.419640434 | 0.603566629 | no |

|              |              |              |             |             |    |
|--------------|--------------|--------------|-------------|-------------|----|
| RPS6         | -0.044893015 | -0.807640545 | 0.419891904 | 0.603887901 | no |
| OTOS         | -0.044884923 | -0.807494664 | 0.419975791 | 0.603968129 | no |
| KIAA1324L    | -0.044880576 | -0.807416314 | 0.420020848 | 0.603988335 | no |
| SLC39A11     | -0.044878146 | -0.807372494 | 0.42004605  | 0.603988335 | no |
| PHLDA1       | -0.044850033 | -0.806865723 | 0.420337566 | 0.604367072 | no |
| CACNG5       | 0.044841205  | 0.806706582  | 0.420429135 | 0.604458291 | no |
| BAZ1B        | 0.044828716  | 0.806481449  | 0.420558695 | 0.604604115 | no |
| PRAMEF17     | -0.044821396 | -0.806349496 | 0.420634644 | 0.604672851 | no |
| CCDC88A      | -0.04481379  | -0.806212391 | 0.420713565 | 0.604745852 | no |
| NYX          | -0.044806071 | -0.806073233 | 0.420793678 | 0.604820555 | no |
| KTN1         | 0.044801805  | 0.805996337  | 0.42083795  | 0.604843736 | no |
| SNORA29      | 0.044796216  | 0.805895591  | 0.420895959 | 0.604886656 | no |
| C17orf105    | 0.044790981  | 0.805801223  | 0.420950299 | 0.604924298 | no |
| CPXM1        | 0.044783038  | 0.805658029  | 0.421032762 | 0.60497262  | no |
| TMEM106B     | -0.044782294 | -0.805644618 | 0.421040486 | 0.60497262  | no |
| TRIM49B      | -0.044779607 | -0.805596194 | 0.421068375 | 0.60497262  | no |
| TNK1         | 0.044769354  | 0.805411368  | 0.421174834 | 0.605085123 | no |
| IZUMO4       | -0.044762518 | -0.805288138 | 0.421245822 | 0.605139717 | no |
| DCT          | -0.044760272 | -0.805247645 | 0.42126915  | 0.605139717 | no |
| ZDHHC8P1     | -0.044747968 | -0.80502585  | 0.42139694  | 0.605282826 | no |
| LCE3A        | -0.04471774  | -0.804480959 | 0.421710983 | 0.605683457 | no |
| SPINK13      | 0.044713972  | 0.804413037  | 0.421750138 | 0.605683457 | no |
| PPHLN1       | 0.044712984  | 0.804395223  | 0.421760408 | 0.605683457 | no |
| SIX3         | -0.044701569 | -0.804189443 | 0.421879052 | 0.605813357 | no |
| CXCL17       | 0.044689177  | 0.803966079  | 0.422007856 | 0.605957829 | no |
| SMCR9        | 0.044683369  | 0.80386138   | 0.422068239 | 0.606004043 | no |
| KEL          | -0.044670971 | -0.803637886 | 0.422197151 | 0.606114837 | no |
| EDDM3A       | 0.044669243  | 0.803606731  | 0.422215124 | 0.606114837 | no |
| WDR49        | 0.044667811  | 0.803580919  | 0.422230014 | 0.606114837 | no |
| ATM          | -0.044664969 | -0.803529687 | 0.42225957  | 0.606116779 | no |
| LCN8         | -0.044659902 | -0.803438352 | 0.422312264 | 0.606145293 | no |
| TF           | -0.044657634 | -0.803397482 | 0.422335844 | 0.606145293 | no |
| MAEA         | 0.044650754  | 0.803273461  | 0.422407404 | 0.606207513 | no |
| INSIG1       | -0.044643433 | -0.803141482 | 0.422483563 | 0.606276326 | no |
| SULT2B1      | -0.044639896 | -0.803077733 | 0.422520353 | 0.606288636 | no |
| MGARP        | 0.044610064  | 0.802539983  | 0.422830766 | 0.606642256 | no |
| PTPDC1       | -0.044609731 | -0.802533975 | 0.422834234 | 0.606642256 | no |
| IGBP1P1      | -0.044608075 | -0.802504119 | 0.422851472 | 0.606642256 | no |
| KBTBD2       | 0.044588568  | 0.802152489  | 0.423054527 | 0.606893054 | no |
| TBC1D23      | 0.044583353  | 0.802058476  | 0.423108826 | 0.606902688 | no |
| 40787        | 0.044582498  | 0.802043073  | 0.423117723 | 0.606902688 | no |
| DYX1C1-CCPG1 | -0.044561676 | -0.80166773  | 0.423334552 | 0.607173176 | no |
| LINC00698    | -0.04455101  | -0.801475481 | 0.423445638 | 0.607291972 | no |
| LINC00271    | 0.044545347  | 0.801373384  | 0.423504638 | 0.607335258 | no |
| NMS          | -0.044542687 | -0.80132545  | 0.42353234  | 0.607335258 | no |
| JAM3         | 0.044537084  | 0.801224443  | 0.423590717 | 0.607365222 | no |
| IFT43        | -0.044535256 | -0.801191499 | 0.423609758 | 0.607365222 | no |
| LOC100505718 | 0.044528626  | 0.80107198   | 0.423678842 | 0.607423749 | no |
| CHAC2        | -0.044507155 | -0.800684947 | 0.423902601 | 0.607704009 | no |
| RAB9BP1      | 0.044500098  | 0.800557751  | 0.423976153 | 0.60776891  | no |
| PDE3A        | 0.04448636   | 0.800310113  | 0.424119373 | 0.607933665 | no |

|              |              |              |             |             |    |
|--------------|--------------|--------------|-------------|-------------|----|
| TAF2         | -0.044478043 | -0.800160192 | 0.424206093 | 0.608017417 | no |
| CAB39        | 0.044470345  | 0.800021431  | 0.424286367 | 0.608091918 | no |
| C1QTNF3-AMAC | 0.044466213  | 0.799946935  | 0.424329467 | 0.608113135 | no |
| TMED10P1     | -0.044459264 | -0.79982168  | 0.424401939 | 0.60817644  | no |
| ZRANB2       | 0.044420959  | 0.799131221  | 0.424801568 | 0.608708528 | no |
| CDK3         | -0.044417252 | -0.799064397 | 0.424840257 | 0.608723379 | no |
| EIF5A2       | 0.04439944   | 0.798743315  | 0.42502618  | 0.608949176 | no |
| NDUFS5       | -0.044394457 | -0.798653501 | 0.425078196 | 0.608983102 | no |
| LAGE3        | 0.044384073  | 0.798466327  | 0.425186609 | 0.609097815 | no |
| CLIC6        | 0.044357978  | 0.797995961  | 0.425459123 | 0.609447578 | no |
| RSPH6A       | -0.044354416 | -0.797931754 | 0.42549633  | 0.609460252 | no |
| TBX10        | -0.04433688  | -0.797615662 | 0.425679529 | 0.609682024 | no |
| CCDC169-SOHL | -0.044319284 | -0.79729848  | 0.425863407 | 0.609904737 | no |
| ZCWPW1       | -0.044301873 | -0.796984648 | 0.426045388 | 0.610117875 | no |
| PPP2R3A      | -0.044299305 | -0.796938357 | 0.426072235 | 0.610117875 | no |
| ADCY6        | -0.044296722 | -0.796891794 | 0.42609924  | 0.610117875 | no |
| SCARF2       | 0.044294183  | 0.796846022  | 0.426125788 | 0.610117875 | no |
| HAVCR1       | -0.04429095  | -0.796787753 | 0.426159585 | 0.610125617 | no |
| FAM86FP      | 0.044285916  | 0.796697019  | 0.426212216 | 0.61016032  | no |
| SNORA26      | -0.044282828 | -0.796641346 | 0.426244511 | 0.610165909 | no |
| PRSS38       | -0.044274603 | -0.796493099 | 0.426330514 | 0.610248373 | no |
| PREP         | -0.044267929 | -0.796372795 | 0.426400314 | 0.610307635 | no |
| ARL15        | 0.044249266  | 0.796036401  | 0.426595524 | 0.610529576 | no |
| USP17L8      | -0.044247592 | -0.796006215 | 0.426613044 | 0.610529576 | no |
| IQCF5        | -0.044243099 | -0.795925235 | 0.426660045 | 0.610529576 | no |
| PLEKHB1      | -0.044242242 | -0.795909791 | 0.42666901  | 0.610529576 | no |
| GALE         | 0.044225608  | 0.795609958  | 0.426843065 | 0.610732843 | no |
| SFTA2        | 0.044223235  | 0.795567184  | 0.4268679   | 0.610732843 | no |
| RAB39A       | 0.044218587  | 0.795483405  | 0.426916543 | 0.610761778 | no |
| P2RY4        | -0.044214546 | -0.795410561 | 0.42695884  | 0.610771447 | no |
| KRTAP10-7    | -0.044211879 | -0.795362485 | 0.426986757 | 0.610771447 | no |
| LINC00707    | 0.044206608  | 0.795267481  | 0.427041927 | 0.610771447 | no |
| PENK         | -0.044205437 | -0.795246373 | 0.427054185 | 0.610771447 | no |
| FAM220A      | 0.04420298   | 0.795202082  | 0.427079908 | 0.610771447 | no |
| C1orf110     | 0.044201651  | 0.795178125  | 0.427093821 | 0.610771447 | no |
| CC2D1A       | 0.04418574   | 0.794891333  | 0.427260402 | 0.610969014 | no |
| LYZL2        | -0.044178451 | -0.794759955 | 0.427336725 | 0.611037496 | no |
| NEBL-AS1     | 0.04417466   | 0.794691614  | 0.42737643  | 0.611053613 | no |
| RNF133       | 0.044167685  | 0.794565899  | 0.427449475 | 0.611108394 | no |
| CLDN20       | -0.044165571 | -0.794527795 | 0.427471615 | 0.611108394 | no |
| DZANK1-AS1   | 0.044158133  | 0.794393712  | 0.427549532 | 0.611179127 | no |
| UFSP2        | -0.044153934 | -0.794318041 | 0.427593509 | 0.611201337 | no |
| RARS2        | 0.044134126  | 0.793961003  | 0.42780104  | 0.611457313 | no |
| LOC100505782 | 0.044114887  | 0.793614212  | 0.428002671 | 0.611704822 | no |
| SCFD2        | -0.044089593 | -0.793158306 | 0.428267828 | 0.612025828 | no |
| THAP1        | 0.044086494  | 0.793102437  | 0.428300329 | 0.612025828 | no |
| ACACB        | 0.044085313  | 0.793081154  | 0.42831271  | 0.612025828 | no |
| SNORA2A      | -0.044078126 | -0.792951606 | 0.428388078 | 0.612060048 | no |
| AQP2         | -0.044077598 | -0.792942084 | 0.428393618 | 0.612060048 | no |
| PDE1C        | 0.044072062  | 0.792842305  | 0.428451673 | 0.6121023   | no |
| ANKRD66      | 0.044046938  | 0.792389461  | 0.42871521  | 0.612405228 | no |



|              |              |              |             |             |    |
|--------------|--------------|--------------|-------------|-------------|----|
| CGB2         | -0.044046415 | -0.792380023 | 0.428720704 | 0.612405228 | no |
| SNORA24      | 0.044028629  | 0.792059443  | 0.428907327 | 0.612615144 | no |
| DEFB122      | -0.044026976 | -0.792029657 | 0.42892467  | 0.612615144 | no |
| ASB14        | -0.044022102 | -0.791941805 | 0.428975822 | 0.612647487 | no |
| HMG2         | -0.044001939 | -0.791578374 | 0.429187468 | 0.612909022 | no |
| PCDHGA9      | 0.04398777   | 0.791322974  | 0.429336238 | 0.613041874 | no |
| MED20        | -0.043987645 | -0.791320725 | 0.429337548 | 0.613041874 | no |
| OR2T4        | -0.04396787  | -0.790964298 | 0.429545217 | 0.613297653 | no |
| SCUBE3       | -0.043954116 | -0.790716378 | 0.4296897   | 0.613463187 | no |
| SYNGR4       | -0.043943169 | -0.790519064 | 0.429804712 | 0.613586625 | no |
| SLC22A2      | -0.04393898  | -0.790443558 | 0.429848727 | 0.613608701 | no |
| U2AF2        | -0.043933135 | -0.790338212 | 0.429910143 | 0.613655611 | no |
| RNASE9       | -0.043926297 | -0.790214966 | 0.429982001 | 0.613717419 | no |
| LMOD3        | 0.043919934  | 0.790100282  | 0.430048872 | 0.613768236 | no |
| ADCK4        | 0.043907705  | 0.78987986   | 0.430177416 | 0.613768236 | no |
| FSCB         | -0.043905279 | -0.789836131 | 0.43020292  | 0.613768236 | no |
| PDHX         | -0.043903429 | -0.789802781 | 0.430222372 | 0.613768236 | no |
| MAP6         | -0.043902767 | -0.789790851 | 0.43022933  | 0.613768236 | no |
| GPI          | 0.043897862  | 0.789702442  | 0.430280898 | 0.613768236 | no |
| AP2A2        | 0.04389663   | 0.789680245  | 0.430293846 | 0.613768236 | no |
| LINC00523    | 0.043893511  | 0.789624012  | 0.430326648 | 0.613768236 | no |
| ACAD11       | -0.043890553 | -0.789570703 | 0.430357746 | 0.613768236 | no |
| CR2          | 0.043889451  | 0.789550843  | 0.430369331 | 0.613768236 | no |
| LOC100996291 | 0.043888121  | 0.789526867  | 0.430383319 | 0.613768236 | no |
| DHRS12       | -0.043888087 | -0.78952625  | 0.430383679 | 0.613768236 | no |
| TMPRSS13     | 0.043887592  | 0.789517342  | 0.430388875 | 0.613768236 | no |
| POLL         | -0.043880188 | -0.789383877 | 0.430466742 | 0.613838547 | no |
| USP1         | -0.043875684 | -0.789302704 | 0.430514104 | 0.613865354 | no |
| KCNF1        | -0.04385788  | -0.7889818   | 0.430701372 | 0.614091633 | no |
| GTPBP8       | 0.043847514  | 0.788794961  | 0.430810426 | 0.614206373 | no |
| PCDHGA6      | -0.043821312 | -0.788322692 | 0.431086153 | 0.614534151 | no |
| FECH         | 0.043819439  | 0.788288928  | 0.431105869 | 0.614534151 | no |
| DSPP         | -0.043817515 | -0.788254254 | 0.431126117 | 0.614534151 | no |
| PSMB11       | -0.043807267 | -0.788069543 | 0.431233992 | 0.614647149 | no |
| MRRF         | -0.043798631 | -0.787913883 | 0.431324911 | 0.614735969 | no |
| GATA2        | 0.04379135   | 0.787782657  | 0.431401569 | 0.614790007 | no |
| CHRNA9       | 0.043789596  | 0.787751037  | 0.431420041 | 0.614790007 | no |
| KRBOX4       | -0.043762647 | -0.787265304 | 0.431703863 | 0.615147911 | no |
| GSTA2        | 0.043760313  | 0.787223248  | 0.431728442 | 0.615147911 | no |
| TAF11        | 0.043742227  | 0.786897257  | 0.431918992 | 0.615378616 | no |
| PFDN1        | -0.043729932 | -0.786675665 | 0.432048545 | 0.615497938 | no |
| H1FOO        | 0.043728843  | 0.78665604   | 0.43206002  | 0.615497938 | no |
| TYW5         | -0.043717939 | -0.786459502 | 0.432174947 | 0.615620851 | no |
| FIBP         | 0.043703855  | 0.786205647  | 0.432323416 | 0.615759909 | no |
| LOC440028    | 0.043703242  | 0.78619461   | 0.432329871 | 0.615759909 | no |
| IFNA13       | -0.043695742 | -0.786059432 | 0.432408944 | 0.615831718 | no |
| ZNF718       | -0.043659846 | -0.785412437 | 0.432787522 | 0.61633004  | no |
| MT4          | 0.04364662   | 0.785174057  | 0.432927055 | 0.616469384 | no |
| C1orf52      | -0.043643675 | -0.785120987 | 0.432958123 | 0.616469384 | no |
| C11orf53     | -0.043642415 | -0.785098265 | 0.432971424 | 0.616469384 | no |
| HSFY1P1      | -0.043639008 | -0.785036875 | 0.433007365 | 0.616479713 | no |

|           |              |              |             |             |    |
|-----------|--------------|--------------|-------------|-------------|----|
| FLJ14107  | -0.043622598 | -0.784741106 | 0.433180544 | 0.616685418 | no |
| TREH      | -0.04361932  | -0.784682011 | 0.43321515  | 0.616693833 | no |
| LOC400620 | 0.043611969  | 0.784549534  | 0.433292735 | 0.616763424 | no |
| BARHL1    | -0.043593255 | -0.784212239 | 0.433490308 | 0.616990576 | no |
| FBX09     | 0.043591416  | 0.784179079  | 0.433509734 | 0.616990576 | no |
| ADPRM     | -0.04358823  | -0.784121672 | 0.433543367 | 0.616997584 | no |
| GZF1      | -0.04356334  | -0.783673052 | 0.433806249 | 0.617330824 | no |
| GRPR      | 0.043559289  | 0.783600053  | 0.433849034 | 0.617330944 | no |
| HP07349   | 0.043557893  | 0.783574887  | 0.433863784 | 0.617330944 | no |
| PCBP1-AS1 | -0.043532914 | -0.783124685 | 0.434127707 | 0.617628149 | no |
| ROCK1P1   | -0.043530649 | -0.783083863 | 0.434151642 | 0.617628149 | no |
| JMJD4     | -0.043529965 | -0.783071522 | 0.434158878 | 0.617628149 | no |
| OR2T3     | -0.043524528 | -0.782973533 | 0.434216337 | 0.617669004 | no |
| DRAP1     | -0.043518779 | -0.782869914 | 0.434277102 | 0.617694219 | no |
| SAE1      | 0.043517412  | 0.782845283  | 0.434291547 | 0.617694219 | no |
| MOS       | -0.043503727 | -0.78259863  | 0.434436214 | 0.617859088 | no |
| UTP3      | 0.043439271  | 0.781436929  | 0.43511795  | 0.618787709 | no |
| ZNF568    | -0.043434014 | -0.781342175 | 0.435173583 | 0.618825877 | no |
| GPCPD1    | 0.043430372  | 0.781276534  | 0.435212126 | 0.618839737 | no |
| ATAD2B    | -0.043420603 | -0.78110046  | 0.43531552  | 0.618945805 | no |
| IFNA8     | -0.043394534 | -0.780630618 | 0.435591492 | 0.619258476 | no |
| TMEM30C   | -0.043394386 | -0.780627955 | 0.435593057 | 0.619258476 | no |
| CCDC17    | 0.043389932  | 0.780547679  | 0.435640219 | 0.619270418 | no |
| ASB2      | -0.04338815  | -0.780515565 | 0.435659087 | 0.619270418 | no |
| CPM       | 0.04337745   | 0.780322721  | 0.435772398 | 0.619390516 | no |
| SLC51B    | -0.043367775 | -0.780148343 | 0.435874873 | 0.619495198 | no |
| ATMIN     | -0.043360273 | -0.780013124 | 0.435954346 | 0.619567177 | no |
| CCL3L1    | 0.043351524  | 0.779855455  | 0.436047023 | 0.619599675 | no |
| TMEM249   | -0.043349633 | -0.779821362 | 0.436067065 | 0.619599675 | no |
| RAP1A     | -0.043348149 | -0.779794616 | 0.436082787 | 0.619599675 | no |
| ACADL     | 0.043347229  | 0.779778034  | 0.436092536 | 0.619599675 | no |
| GOLGA6B   | -0.043330188 | -0.779470907 | 0.436273108 | 0.619815255 | no |
| CITED4    | 0.043320218  | 0.779291231  | 0.436378768 | 0.619924385 | no |
| PRRG1     | 0.043311534  | 0.779134705  | 0.436470825 | 0.620012337 | no |
| CELP      | 0.043308934  | 0.77908786   | 0.436498378 | 0.620012337 | no |
| C3orf22   | -0.043303902 | -0.778997163 | 0.436551727 | 0.620047133 | no |
| ZBTB25    | -0.043298085 | -0.778892322 | 0.436613401 | 0.620093748 | no |
| CCM2L     | -0.043292776 | -0.778796641 | 0.436669689 | 0.62013271  | no |
| CHRNA1    | 0.043288242  | 0.778714924  | 0.436717767 | 0.620145264 | no |
| FBXL3     | -0.0432865   | -0.778683524 | 0.436736242 | 0.620145264 | no |
| ANG       | -0.043269469 | -0.778376589 | 0.436916856 | 0.620360739 | no |
| ESR2      | 0.043266509  | 0.778323243  | 0.436948252 | 0.620364331 | no |
| SLC5A10   | -0.043251494 | -0.778052623 | 0.437107539 | 0.620531408 | no |
| ENKUR     | -0.043249973 | -0.778025205 | 0.437123679 | 0.620531408 | no |
| XDH       | 0.043239089  | 0.777829043  | 0.437239163 | 0.62065435  | no |
| CNOT6L    | 0.04323564   | 0.77776689   | 0.437275758 | 0.6206653   | no |
| FAM53A    | -0.043231306 | -0.777688774 | 0.437321754 | 0.620689592 | no |
| SRSF6     | -0.043209699 | -0.777299362 | 0.437551086 | 0.6209534   | no |
| SCGB2A2   | 0.043208349  | 0.777275038  | 0.437565413 | 0.6209534   | no |
| LOC285548 | -0.043174176 | -0.776659145 | 0.437928273 | 0.621424452 | no |
| LARP4     | 0.043171643  | 0.776613488  | 0.437955179 | 0.621424452 | no |

|           |              |              |             |             |    |
|-----------|--------------|--------------|-------------|-------------|----|
| ACTRT1    | -0.043158047 | -0.77636846  | 0.438099593 | 0.621588325 | no |
| CDX4      | -0.043144769 | -0.776129149 | 0.438240665 | 0.621739077 | no |
| NRIP2     | -0.0431426   | -0.776090069 | 0.438263705 | 0.621739077 | no |
| CLDN18    | -0.04313842  | -0.776014732 | 0.438308122 | 0.621761046 | no |
| AKAP12    | 0.043131573  | 0.775891332  | 0.438380882 | 0.621823215 | no |
| PYCRL     | -0.043091191 | -0.775163559 | 0.438810137 | 0.622391015 | no |
| DPY19L2P1 | 0.04306143   | 0.774627192  | 0.439126652 | 0.622798844 | no |
| DFNA5     | -0.043034504 | -0.774141918 | 0.439413131 | 0.623164022 | no |
| CASZ1     | 0.043027107  | 0.774008617  | 0.439491843 | 0.623234523 | no |
| LUZP4     | 0.043006445  | 0.773636237  | 0.439711771 | 0.623505257 | no |
| PRUNE2    | 0.042970821  | 0.772994207  | 0.440091103 | 0.623987132 | no |
| GPATCH4   | 0.042969077  | 0.772962789  | 0.440109671 | 0.623987132 | no |
| HYOU1     | -0.042965064 | -0.772890459 | 0.440152419 | 0.624006573 | no |
| DPM2      | 0.042950082  | 0.772620454  | 0.440312016 | 0.624191658 | no |
| HYAL3     | 0.042942923  | 0.772491431  | 0.440388292 | 0.624258609 | no |
| DYNLT1    | 0.042929677  | 0.772252715  | 0.440529436 | 0.624417498 | no |
| PLN       | -0.042918523 | -0.772051699 | 0.44064831  | 0.624544801 | no |
| PON2      | -0.042912929 | -0.771950887 | 0.440707933 | 0.624561035 | no |
| LINC00645 | -0.042911995 | -0.77193406  | 0.440717886 | 0.624561035 | no |
| UOX       | 0.04290669   | 0.771838442  | 0.440774442 | 0.624599996 | no |
| PROCA1    | -0.042891944 | -0.771572699 | 0.440931648 | 0.624781568 | no |
| C16orf58  | -0.042864722 | -0.771082105 | 0.441221953 | 0.625117439 | no |
| LOC731779 | 0.042864262  | 0.771073815  | 0.441226859 | 0.625117439 | no |
| NLRP5     | -0.042848561 | -0.770790849 | 0.441394353 | 0.625313517 | no |
| TSPAN8    | -0.042833527 | -0.770519916 | 0.441554759 | 0.625475953 | no |
| PLCXD2    | -0.042830165 | -0.770459318 | 0.441590641 | 0.625475953 | no |
| BAALC     | -0.042829632 | -0.770449717 | 0.441596326 | 0.625475953 | no |
| NEU2      | -0.042826681 | -0.770396541 | 0.441627814 | 0.62547933  | no |
| RPL23P8   | -0.042797052 | -0.769862566 | 0.441944082 | 0.625875568 | no |
| DLAT      | -0.042795015 | -0.769825858 | 0.441965828 | 0.625875568 | no |
| UGT2A1    | -0.042775308 | -0.769470708 | 0.442176258 | 0.62610964  | no |
| TAC4      | 0.042774079  | 0.769448553  | 0.442189387 | 0.62610964  | no |
| SLC35C2   | -0.04277093  | -0.769391815 | 0.44222301  | 0.626115997 | no |
| RGS17     | 0.042759287  | 0.769181973  | 0.442347378 | 0.626250823 | no |
| ID1       | -0.042751074 | -0.769033975 | 0.442435105 | 0.626333762 | no |
| SNORD12B  | -0.04272582  | -0.768578855 | 0.442704942 | 0.626674477 | no |
| LOC730227 | 0.042720891  | 0.768490023  | 0.442757621 | 0.626686378 | no |
| CYP1A2    | -0.042719576 | -0.768466334 | 0.44277167  | 0.626686378 | no |
| KCTD21    | 0.04270616   | 0.768224543  | 0.442915077 | 0.626848068 | no |
| HTN3      | 0.042693998  | 0.768005368  | 0.443045093 | 0.626975973 | no |
| FTSJ3     | -0.042692248 | -0.767973838 | 0.443063799 | 0.626975973 | no |
| PARP16    | -0.042679278 | -0.767740098 | 0.443202483 | 0.62713093  | no |
| SOLH      | 0.042673928  | 0.767643691  | 0.443259691 | 0.627170585 | no |
| GPR68     | 0.04265594   | 0.767319511  | 0.443452091 | 0.627360976 | no |
| SNORA36A  | -0.042655889 | -0.767318594 | 0.443452636 | 0.627360976 | no |
| KRT19P2   | -0.04263309  | -0.766907733 | 0.44369655  | 0.627664728 | no |
| UNQ6494   | -0.042622913 | -0.76672433  | 0.443805454 | 0.62775301  | no |
| TMEM38B   | 0.042621296  | 0.766695191  | 0.443822759 | 0.62775301  | no |
| TTC39B    | -0.042616764 | -0.766613508 | 0.443871268 | 0.62775301  | no |
| THBS4     | 0.042616341  | 0.766605883  | 0.443875796 | 0.62775301  | no |
| ST8SIA6   | -0.042602025 | -0.766347891 | 0.444029033 | 0.627928403 | no |

|              |              |              |             |             |    |
|--------------|--------------|--------------|-------------|-------------|----|
| TCEANC       | -0.042585171 | -0.766044173 | 0.444209466 | 0.628142232 | no |
| LSM1         | 0.042580879  | 0.765966829  | 0.444255422 | 0.628153339 | no |
| ATG10        | -0.042578978 | -0.76593257  | 0.444275779 | 0.628153339 | no |
| TNNT3        | -0.042575453 | -0.765869042 | 0.444313528 | 0.628165385 | no |
| PLEKHG4B     | 0.042562398  | 0.765633778  | 0.444453342 | 0.62832172  | no |
| RNASE10      | 0.042558596  | 0.76556526   | 0.444494067 | 0.628337959 | no |
| ABCA10       | 0.042545831  | 0.765335209  | 0.444630814 | 0.628489925 | no |
| AFG3L1P      | -0.042513932 | -0.764760363 | 0.444972622 | 0.628900956 | no |
| UBAC2        | -0.042512868 | -0.764741181 | 0.44498403  | 0.628900956 | no |
| SRGAP2       | 0.042510501  | 0.764698538  | 0.445009392 | 0.628900956 | no |
| DAB1         | -0.042498073 | -0.764474568 | 0.445142613 | 0.629047863 | no |
| ETNK2        | 0.042490034  | 0.764329688  | 0.445228802 | 0.629128292 | no |
| VGLL2        | 0.042484533  | 0.764230568  | 0.445287774 | 0.629170254 | no |
| RFPL4B       | -0.042467505 | -0.763923698 | 0.445470377 | 0.629351084 | no |
| RSL1D1       | -0.042467137 | -0.763917066 | 0.445474324 | 0.629351084 | no |
| SMIM11       | -0.042464398 | -0.763867711 | 0.445503697 | 0.629351209 | no |
| LOC643648    | 0.042459179  | 0.763773651  | 0.445559678 | 0.629385575 | no |
| ABCC6P1      | 0.042453509  | 0.763671485  | 0.445620488 | 0.629385575 | no |
| MIEN1        | -0.042451028 | -0.763626776 | 0.445647101 | 0.629385575 | no |
| EDN1         | 0.042448798  | 0.763586589  | 0.445671023 | 0.629385575 | no |
| POLR3E       | 0.042448479  | 0.763580826  | 0.445674453 | 0.629385575 | no |
| DIP2A-IT1    | 0.04244459   | 0.763510756  | 0.445716165 | 0.629403122 | no |
| FAM162B      | 0.042441305  | 0.763451561  | 0.445751405 | 0.629411527 | no |
| CX3CL1       | -0.042428982 | -0.763229478 | 0.44588363  | 0.629556869 | no |
| EZH2         | -0.04242112  | -0.763087805 | 0.445967992 | 0.629634615 | no |
| MAP3K4       | -0.042407851 | -0.76284868  | 0.446110403 | 0.629794303 | no |
| ANKHD1       | -0.042398554 | -0.762681137 | 0.446210199 | 0.629798494 | no |
| PWRN2        | -0.042396606 | -0.762646044 | 0.446231104 | 0.629798494 | no |
| ELAVL1       | -0.042396132 | -0.762637504 | 0.446236192 | 0.629798494 | no |
| SLC25A28     | -0.042395088 | -0.762618692 | 0.446247398 | 0.629798494 | no |
| SPRR2D       | -0.042393924 | -0.762597709 | 0.446259898 | 0.629798494 | no |
| CSE1L        | 0.042389429  | 0.762516708  | 0.446308154 | 0.629804192 | no |
| C20orf173    | -0.042388089 | -0.76249255  | 0.446322546 | 0.629804192 | no |
| PRAMEF4      | 0.042367137  | 0.762114991  | 0.446547517 | 0.630080276 | no |
| TRIM31       | -0.042351687 | -0.76183657  | 0.446713457 | 0.630273037 | no |
| ZNF780A      | -0.042345975 | -0.761733628 | 0.44677482  | 0.630281859 | no |
| PPY2         | -0.042345645 | -0.761727681 | 0.446778365 | 0.630281859 | no |
| KCNK18       | -0.042342441 | -0.761669942 | 0.446812785 | 0.630289042 | no |
| NPFF         | -0.042333569 | -0.761510066 | 0.4469081   | 0.630377229 | no |
| LOC100507384 | -0.042331162 | -0.761466685 | 0.446933965 | 0.630377229 | no |
| LDLR         | 0.042320915  | 0.761282039  | 0.447044065 | 0.630491141 | no |
| RDM1         | -0.042312557 | -0.761131412 | 0.447133892 | 0.630564214 | no |
| ISOC1        | 0.042310634  | 0.76109676   | 0.447154559 | 0.630564214 | no |
| SNAP29       | -0.042293013 | -0.760779222 | 0.447343963 | 0.630744972 | no |
| EVX2         | -0.042291895 | -0.760759079 | 0.447355979 | 0.630744972 | no |
| FAM47C       | -0.042287882 | -0.76068676  | 0.447399123 | 0.630744972 | no |
| GUCA1C       | -0.042287787 | -0.76068506  | 0.447400137 | 0.630744972 | no |
| FAM74A4      | -0.042282239 | -0.760585073 | 0.447459791 | 0.630787692 | no |
| OR1E2        | -0.042278503 | -0.760517758 | 0.447499954 | 0.630802933 | no |
| LINC00304    | -0.042266847 | -0.760307702 | 0.447625298 | 0.630938236 | no |
| FREM2        | -0.042259665 | -0.760178278 | 0.447702537 | 0.630983622 | no |

|              |              |              |             |             |    |
|--------------|--------------|--------------|-------------|-------------|----|
| C19orf71     | 0.04225402   | 0.760101455  | 0.447748389 | 0.630983622 | no |
| CLPP         | 0.042254658  | 0.760088057  | 0.447756385 | 0.630983622 | no |
| CEL          | -0.042252933 | -0.760056971 | 0.447774939 | 0.630983622 | no |
| C20orf85     | -0.042234604 | -0.759726676 | 0.447972109 | 0.631196863 | no |
| CACNA1F      | 0.042232392  | 0.759686809  | 0.447995912 | 0.631196863 | no |
| SPATA9       | -0.042230676 | -0.759655883 | 0.448014376 | 0.631196863 | no |
| MRPL39       | -0.04222636  | -0.759578105 | 0.448060816 | 0.631200994 | no |
| MTFMT        | -0.042222688 | -0.759511947 | 0.448100319 | 0.631200994 | no |
| LAD1         | 0.042222214  | 0.759503406  | 0.448105419 | 0.631200994 | no |
| HEATR5A      | -0.04220927  | -0.759270134 | 0.448244725 | 0.631355838 | no |
| NDUFA9       | 0.042204595  | 0.759185903  | 0.448295032 | 0.631385316 | no |
| LOC400654    | -0.042190136 | -0.758925341 | 0.448450674 | 0.631563135 | no |
| CABP5        | -0.042184436 | -0.75882263  | 0.448512035 | 0.631608161 | no |
| STK3         | 0.042163181  | 0.758439612  | 0.448740898 | 0.631858294 | no |
| GUCY1A3      | 0.042162479  | 0.758426959  | 0.448748459 | 0.631858294 | no |
| GAGE10       | -0.042158006 | -0.758346348 | 0.448796636 | 0.631861973 | no |
| PGF          | -0.042156777 | -0.758324196 | 0.448809875 | 0.631861973 | no |
| LSM6         | -0.042153357 | -0.758262577 | 0.448846703 | 0.631872429 | no |
| SLMO2-ATP5E  | 0.042149208  | 0.758187816  | 0.448891389 | 0.631893943 | no |
| MGAT5        | 0.042142821  | 0.758072715  | 0.44896019  | 0.631949401 | no |
| TRPV5        | -0.042130104 | -0.757843543 | 0.449097196 | 0.632099971 | no |
| ZNF329       | -0.042127431 | -0.757795391 | 0.449125986 | 0.632099971 | no |
| CYTH2        | 0.042124534  | 0.757743172  | 0.449157208 | 0.632102519 | no |
| NUDT7        | -0.042119088 | -0.757645033 | 0.449215891 | 0.632114425 | no |
| C4orf33      | 0.042118289  | 0.757630644  | 0.449224495 | 0.632114425 | no |
| SUMF2        | -0.042105602 | -0.757402029 | 0.449361213 | 0.632265408 | no |
| CKS2         | -0.042096868 | -0.757244635 | 0.449455354 | 0.632341152 | no |
| UGP2         | 0.042095148  | 0.757213641  | 0.449473893 | 0.632341152 | no |
| EPGN         | -0.042082537 | -0.756986383 | 0.449609843 | 0.632454428 | no |
| OGT          | -0.042080972 | -0.756958195 | 0.449626707 | 0.632454428 | no |
| FAM173B      | -0.0420783   | -0.756910047 | 0.449655514 | 0.632454428 | no |
| MTFR1L       | 0.04207676   | 0.756882283  | 0.449672126 | 0.632454428 | no |
| ZNF695       | -0.042072484 | -0.756805241 | 0.449718222 | 0.632477869 | no |
| SYNE2        | -0.042064316 | -0.756658042 | 0.449806304 | 0.632522188 | no |
| OR8D2        | 0.042064103  | 0.756654208  | 0.449808599 | 0.632522188 | no |
| DLEC1        | 0.042040412  | 0.756227302  | 0.45006411  | 0.632826269 | no |
| B4GALNT3     | -0.042036843 | -0.756162991 | 0.450102608 | 0.632826269 | no |
| HIST3H3      | -0.042035863 | -0.756145332 | 0.45011318  | 0.632826269 | no |
| OR5B12       | -0.042027601 | -0.75599645  | 0.450202313 | 0.63291018  | no |
| LOC100144597 | 0.04202      | 0.755859482  | 0.450284323 | 0.632984065 | no |
| MRPS18B      | -0.04201185  | -0.755712605 | 0.450372275 | 0.633066294 | no |
| MSH6         | -0.04199169  | -0.755349324 | 0.450589855 | 0.633290108 | no |
| USP45        | -0.041991636 | -0.755348356 | 0.450590435 | 0.633290108 | no |
| LDB2         | -0.041985064 | -0.755229937 | 0.450661373 | 0.633348389 | no |
| OCSTAMP      | 0.041971535  | 0.754986147  | 0.450807433 | 0.63351223  | no |
| ZFAT-AS1     | -0.041955316 | -0.754693879 | 0.450982572 | 0.633708381 | no |
| LOC728392    | 0.041953148  | 0.754654809  | 0.451005988 | 0.633708381 | no |
| LZTR1        | -0.041947651 | -0.754555756 | 0.451065355 | 0.633750363 | no |
| SHISA3       | -0.041944768 | -0.754503804 | 0.451096494 | 0.633752681 | no |
| LINC00701    | -0.041933797 | -0.754306119 | 0.451214995 | 0.633877726 | no |
| TADA3        | -0.041913522 | -0.753940761 | 0.451434052 | 0.634110881 | no |

|              |              |              |             |             |    |
|--------------|--------------|--------------|-------------|-------------|----|
| ERCC6L       | 0.041912974  | 0.753930885  | 0.451439974 | 0.634110881 | no |
| PURB         | -0.041908176 | -0.753844438 | 0.451491814 | 0.634117504 | no |
| IQCF2        | -0.04190534  | -0.753793334 | 0.451522461 | 0.634117504 | no |
| HNRPLL       | -0.04190092  | -0.753713686 | 0.451570229 | 0.634117504 | no |
| ESPN         | -0.041900638 | -0.753708606 | 0.451573276 | 0.634117504 | no |
| LOC100508120 | 0.041898886  | 0.75367702   | 0.45159222  | 0.634117504 | no |
| FXYD1        | -0.041880784 | -0.75335084  | 0.451787877 | 0.634314765 | no |
| CLEC2A       | -0.041878912 | -0.753317099 | 0.451808119 | 0.634314765 | no |
| LOC100499489 | 0.041876239  | 0.753268942  | 0.45183701  | 0.634314765 | no |
| HSD17B13     | -0.041874967 | -0.75324602  | 0.451850763 | 0.634314765 | no |
| LOC441455    | -0.041872136 | -0.753195011 | 0.451881367 | 0.634316294 | no |
| ANXA7        | 0.041866507  | 0.753093564  | 0.451942236 | 0.634360303 | no |
| GDI2         | 0.041855787  | 0.7529004    | 0.452058149 | 0.634481563 | no |
| TKT          | 0.041848795  | 0.752774404  | 0.452133766 | 0.634546253 | no |
| PARD6G-AS1   | 0.041798742  | 0.751872478  | 0.452675267 | 0.635264735 | no |
| LOC100130964 | 0.041794519  | 0.751796386  | 0.452720968 | 0.635287386 | no |
| CEBPA-AS1    | 0.041786523  | 0.751652304  | 0.452807511 | 0.635367343 | no |
| ADAMTSL5     | -0.041776328 | -0.751468596 | 0.45291787  | 0.635480704 | no |
| PPIP5K1      | 0.041771351  | 0.751378918  | 0.452971747 | 0.635514807 | no |
| WRAP53       | -0.041764484 | -0.751255175 | 0.453046097 | 0.635577627 | no |
| MBD3L2       | 0.041758445  | 0.751146349  | 0.453111489 | 0.63558483  | no |
| OIP5         | 0.041756816  | 0.751116992  | 0.45312913  | 0.63558483  | no |
| JAGN1        | 0.041755816  | 0.751098979  | 0.453139955 | 0.63558483  | no |
| ODAM         | 0.041750435  | 0.751002012  | 0.453198228 | 0.635625081 | no |
| LOC91450     | 0.041747205  | 0.750943821  | 0.4532332   | 0.635632649 | no |
| ST6GALNAC3   | 0.041736033  | 0.750742514  | 0.453354196 | 0.635731004 | no |
| RWDD3        | -0.041734357 | -0.750712308 | 0.453372354 | 0.635731004 | no |
| SNRPB        | 0.041732536  | 0.750679499  | 0.453392075 | 0.635731004 | no |
| NBAS         | -0.041728501 | -0.750606784 | 0.453435788 | 0.635750816 | no |
| LY6G6F       | -0.041722077 | -0.750491034 | 0.453505374 | 0.635806902 | no |
| PINLYP       | 0.041716238  | 0.750385816  | 0.453568635 | 0.635854112 | no |
| EGR4         | -0.041705534 | -0.750192934 | 0.453684616 | 0.635973928 | no |
| ZNF841       | -0.041702888 | -0.750145255 | 0.453713288 | 0.635973928 | no |
| ZNF304       | -0.04169094  | -0.749929969 | 0.453842764 | 0.636113927 | no |
| ACTC1        | -0.041666424 | -0.749488204 | 0.454108514 | 0.636413913 | no |
| NBLA00301    | 0.041665732  | 0.749475731  | 0.454116019 | 0.636413913 | no |
| ZNF17        | 0.041657657  | 0.749330228  | 0.454203568 | 0.636495102 | no |
| RPS19BP1     | -0.041652016 | -0.749228595 | 0.454264727 | 0.6365393   | no |
| CADM3        | 0.041629062  | 0.748814988  | 0.454513666 | 0.636846603 | no |
| MUC2         | -0.041621612 | -0.748680741 | 0.454594482 | 0.636918314 | no |
| GNG7         | -0.041617563 | -0.748607785 | 0.454638405 | 0.636938329 | no |
| H3F3C        | -0.041610328 | -0.74847742  | 0.454716897 | 0.637006768 | no |
| INO80        | 0.04160218   | 0.748330599  | 0.454805306 | 0.63708909  | no |
| CXorf48      | 0.041595926  | 0.748217913  | 0.454873166 | 0.63714262  | no |
| SGCD         | 0.04159299   | 0.748164997  | 0.454905035 | 0.637145731 | no |
| SERPINB4     | 0.041580218  | 0.747934858  | 0.455043651 | 0.637298345 | no |
| HNRNPU-AS1   | -0.04156583  | -0.747675614 | 0.455199826 | 0.637475528 | no |
| SYCE1L       | 0.041560954  | 0.747587741  | 0.455252769 | 0.637508129 | no |
| NPM3         | 0.041548083  | 0.747355825  | 0.455392515 | 0.637662272 | no |
| DDX3X        | 0.041530155  | 0.747032788  | 0.455587209 | 0.637820188 | no |
| MTNR1B       | -0.04152983  | -0.747026925 | 0.455590744 | 0.637820188 | no |

|            |              |              |             |             |    |
|------------|--------------|--------------|-------------|-------------|----|
| MAMSTR     | -0.0415295   | -0.747020978 | 0.455594328 | 0.637820188 | no |
| LIPK       | 0.041506456  | 0.746605765  | 0.455844648 | 0.638122646 | no |
| ARIH2      | -0.041504145 | -0.74656412  | 0.455869759 | 0.638122646 | no |
| IFT81      | -0.041498813 | -0.746468044 | 0.455927693 | 0.638162176 | no |
| HIST1H4J   | -0.041495029 | -0.746399863 | 0.455968809 | 0.638170663 | no |
| GRM6       | -0.04149279  | -0.746359508 | 0.455993146 | 0.638170663 | no |
| FAM53B     | 0.041482575  | 0.746175446  | 0.456104157 | 0.638214813 | no |
| SYS1       | -0.041481251 | -0.746151603 | 0.456118538 | 0.638214813 | no |
| DDX27      | 0.041478694  | 0.746105518  | 0.456146335 | 0.638214813 | no |
| YPEL3      | -0.041476272 | -0.746061883 | 0.456172656 | 0.638214813 | no |
| C7orf25    | 0.041476224  | 0.746061019  | 0.456173177 | 0.638214813 | no |
| LINC00207  | -0.04146956  | -0.745940931 | 0.456245618 | 0.638274612 | no |
| RPS4X      | -0.04145144  | -0.745614435 | 0.456442606 | 0.638508628 | no |
| HBE1       | -0.041425405 | -0.745145334 | 0.456725716 | 0.638840424 | no |
| CRYGC      | -0.041423296 | -0.745107323 | 0.456748661 | 0.638840424 | no |
| PNLIPRP2   | -0.041421428 | -0.745073677 | 0.456768971 | 0.638840424 | no |
| ALDH1A3    | 0.041411556  | 0.744895786  | 0.456876363 | 0.638945041 | no |
| TTY13      | 0.041409086  | 0.74485128   | 0.456903233 | 0.638945041 | no |
| TNFRSF25   | 0.041400771  | 0.744701458  | 0.456993694 | 0.63899366  | no |
| TMEM89     | 0.041400424  | 0.74469521   | 0.456997467 | 0.63899366  | no |
| FGF7       | 0.041396536  | 0.744625156  | 0.457039768 | 0.639011233 | no |
| C1orf213   | 0.041384759  | 0.744412951  | 0.45716792  | 0.639148827 | no |
| VCX3A      | 0.041373932  | 0.744217864  | 0.457285752 | 0.639271976 | no |
| PCDHGC5    | -0.041351779 | -0.743818694 | 0.457526902 | 0.639561051 | no |
| OR7G2      | -0.041348499 | -0.743759593 | 0.457562613 | 0.639561051 | no |
| OR2A5      | -0.041346735 | -0.74372782  | 0.457581812 | 0.639561051 | no |
| RPS16P5    | 0.041339997  | 0.743606414  | 0.457655176 | 0.639621993 | no |
| F10        | -0.041334642 | -0.74350992  | 0.457713491 | 0.639661895 | no |
| LNX1       | -0.04132429  | -0.743323384 | 0.457826233 | 0.639777852 | no |
| TRIM24     | -0.041315765 | -0.743169793 | 0.457919075 | 0.639865985 | no |
| HHIP-AS1   | -0.041310605 | -0.743076805 | 0.45797529  | 0.639902929 | no |
| ZRSR2      | 0.041304983  | 0.742975513  | 0.458036529 | 0.639946889 | no |
| GUCY1B2    | -0.041292055 | -0.742742576 | 0.458177374 | 0.640102058 | no |
| GSTTP2     | -0.041286245 | -0.742637886 | 0.458240683 | 0.64014889  | no |
| SLC25A26   | -0.041282469 | -0.742569846 | 0.458281831 | 0.64016476  | no |
| MIR3648    | -0.041279473 | -0.742515875 | 0.458314473 | 0.640168746 | no |
| COL14A1    | 0.041251654  | 0.742014627  | 0.458617687 | 0.64055064  | no |
| HORMAD2    | 0.041239252  | 0.741791154  | 0.458752906 | 0.640697862 | no |
| C14orf166B | -0.041210015 | -0.741264363 | 0.459071747 | 0.641082801 | no |
| LINC00628  | -0.041208184 | -0.74123137  | 0.459091719 | 0.641082801 | no |
| SRM        | 0.041204297  | 0.741161342  | 0.459134115 | 0.641082801 | no |
| PRAMEF11   | 0.041203038  | 0.741138653  | 0.459147851 | 0.641082801 | no |
| PRTN3      | -0.041194867 | -0.740991416 | 0.459236997 | 0.641165614 | no |
| NFAT5      | -0.041175965 | -0.740650849 | 0.459443233 | 0.641411882 | no |
| FITM1      | -0.041170254 | -0.74054794  | 0.459505561 | 0.641457228 | no |
| MIR1284    | -0.041156423 | -0.740298741 | 0.459656513 | 0.641626274 | no |
| GAREM      | 0.041142481  | 0.740047526  | 0.459808714 | 0.641797043 | no |
| SNHG3      | 0.041134335  | 0.739900768  | 0.459897641 | 0.641879478 | no |
| CDK5       | -0.041117999 | -0.739606428 | 0.460076025 | 0.642086456 | no |
| WASH7P     | -0.04110941  | -0.739451668 | 0.460169832 | 0.642086456 | no |
| CELF1      | -0.041109111 | -0.739446273 | 0.460173103 | 0.642086456 | no |

|              |              |              |             |             |    |
|--------------|--------------|--------------|-------------|-------------|----|
| PHF15        | 0.04110721   | 0.739412032  | 0.46019386  | 0.642086456 | no |
| MRGPRG       | -0.041107076 | -0.739409618 | 0.460195323 | 0.642086456 | no |
| KCNV2        | -0.041085255 | -0.739016441 | 0.460433702 | 0.64237735  | no |
| NGF          | 0.041069122  | 0.738725765  | 0.46060998  | 0.64258157  | no |
| SKP1         | -0.041062996 | -0.738615391 | 0.460676926 | 0.642633248 | no |
| DNAJB13      | 0.041055212  | 0.738475128  | 0.460762008 | 0.642710217 | no |
| FETUB        | 0.041048752  | 0.738358735  | 0.460832617 | 0.64276699  | no |
| PGAM5        | -0.041041542 | -0.738228842 | 0.460911424 | 0.642835188 | no |
| PTCD2        | 0.041038521  | 0.738174399  | 0.460944457 | 0.642839541 | no |
| SPIN4        | -0.041021524 | -0.737868158 | 0.461130291 | 0.643016371 | no |
| PVRIG        | -0.041021451 | -0.737866837 | 0.461131093 | 0.643016371 | no |
| SLC13A4      | -0.041012395 | -0.737703671 | 0.461230123 | 0.643112735 | no |
| AHCYL2       | 0.041006336  | 0.7375945    | 0.461296389 | 0.643163403 | no |
| PCDHB5       | -0.040995765 | -0.737404041 | 0.461412009 | 0.643237825 | no |
| RNF216-IT1   | 0.040994877  | 0.737388048  | 0.461421718 | 0.643237825 | no |
| CCDC153      | 0.040991971  | 0.737335686  | 0.461453508 | 0.643237825 | no |
| KRTAP19-5    | -0.040989051 | -0.737283066 | 0.461485456 | 0.643237825 | no |
| SNORA70B     | 0.040987774  | 0.737260068  | 0.46149942  | 0.643237825 | no |
| RGS20        | -0.040983493 | -0.737182919 | 0.461546263 | 0.643261397 | no |
| PSD3         | -0.040974994 | -0.737029796 | 0.461639244 | 0.643349264 | no |
| GABRR2       | 0.040967725  | 0.736898827  | 0.461718782 | 0.643418385 | no |
| SERPINA6     | 0.040960625  | 0.736770906  | 0.461796475 | 0.643484928 | no |
| KRTAP2-2     | -0.040957833 | -0.736720596 | 0.461827034 | 0.643485787 | no |
| LRRC36       | 0.04094862   | 0.736554595  | 0.46192787  | 0.643584561 | no |
| C16orf70     | 0.040944231  | 0.736475517  | 0.46197591  | 0.643585556 | no |
| SNORA15      | 0.040943082  | 0.73645483   | 0.461988478 | 0.643585556 | no |
| POTEG        | -0.040928088 | -0.736184662 | 0.462152628 | 0.643736184 | no |
| PHLDB1       | 0.040927733  | 0.736178272  | 0.462156511 | 0.643736184 | no |
| NIPA2        | 0.040921829  | 0.7360719    | 0.462221151 | 0.643784494 | no |
| SCGB2A1      | 0.040917736  | 0.735998147  | 0.462265971 | 0.643805196 | no |
| MICALL1      | 0.040906568  | 0.735796939  | 0.46238826  | 0.643933781 | no |
| EHHADH-AS1   | -0.040898557 | -0.735652586 | 0.462476006 | 0.644010446 | no |
| LOC339975    | -0.04089607  | -0.735607779 | 0.462503244 | 0.644010446 | no |
| C16orf11     | 0.040892624  | 0.735545703  | 0.462540981 | 0.644021265 | no |
| LOC100131496 | -0.040864805 | -0.735044467 | 0.462845756 | 0.644374698 | no |
| NMD3         | 0.040863981  | 0.735029618  | 0.462854786 | 0.644374698 | no |
| SPANXD       | -0.040853604 | -0.734842653 | 0.4629685   | 0.644491257 | no |
| SULT1E1      | 0.040834281  | 0.734494519  | 0.463180279 | 0.644732418 | no |
| RPL13AP17    | -0.040831705 | -0.734448096 | 0.463208523 | 0.644732418 | no |
| ANKRD20A1    | -0.040829555 | -0.734409364 | 0.463232089 | 0.644732418 | no |
| GNA13        | 0.040826851  | 0.734360637  | 0.463261737 | 0.644732418 | no |
| FLJ36000     | -0.040820299 | -0.734242603 | 0.46333356  | 0.64479062  | no |
| SMG5         | 0.040814301  | 0.734134527  | 0.463399328 | 0.644814592 | no |
| ARHGAP11B    | 0.040813255  | 0.734115687  | 0.463410794 | 0.644814592 | no |
| TRPC4        | -0.040810379 | -0.73406387  | 0.463442329 | 0.644816722 | no |
| ANAPC5       | -0.040807359 | -0.73400946  | 0.463475443 | 0.644821049 | no |
| KXD1         | -0.040787421 | -0.73365023  | 0.463694107 | 0.645071548 | no |
| FBX018       | 0.04078492   | 0.733605164  | 0.463721543 | 0.645071548 | no |
| DDX31        | -0.040778815 | -0.73349518  | 0.463788504 | 0.645071548 | no |
| KIF18B       | -0.040776994 | -0.733462362 | 0.463808486 | 0.645071548 | no |
| GPRC6A       | 0.040776147  | 0.733447111  | 0.463817771 | 0.645071548 | no |



|              |              |              |             |             |    |
|--------------|--------------|--------------|-------------|-------------|----|
| WDR69        | 0.040774523  | 0.733417849  | 0.463835589 | 0.645071548 | no |
| OTOP2        | -0.040752861 | -0.733027553 | 0.464073269 | 0.645360335 | no |
| NAV3         | -0.04073607  | -0.732725041 | 0.464257537 | 0.645574812 | no |
| MOCS3        | -0.04072922  | -0.732601608 | 0.464332735 | 0.645637604 | no |
| C17orf77     | -0.040718595 | -0.732410183 | 0.464449369 | 0.645723336 | no |
| ARHGAP28     | -0.040718129 | -0.732401789 | 0.464454484 | 0.645723336 | no |
| GOLM1        | -0.040694526 | -0.731976531 | 0.464713651 | 0.646041858 | no |
| CLDN15       | -0.04068384  | -0.731784001 | 0.464831012 | 0.646163213 | no |
| SIRT6        | -0.040677985 | -0.731678509 | 0.464895324 | 0.646210815 | no |
| TMEM25       | -0.04066298  | -0.731408181 | 0.46506015  | 0.646357217 | no |
| PLCG1        | -0.040662921 | -0.731407115 | 0.4650608   | 0.646357217 | no |
| EIF6         | 0.040650967  | 0.73119174   | 0.465192142 | 0.646446575 | no |
| MAFG-AS1     | -0.040649408 | -0.731163657 | 0.46520927  | 0.646446575 | no |
| MAP1S        | -0.040648857 | -0.731153715 | 0.465215333 | 0.646446575 | no |
| GFM2         | -0.040641727 | -0.73102527  | 0.465293676 | 0.646511428 | no |
| GPR89B       | -0.040639135 | -0.730978554 | 0.465322171 | 0.646511428 | no |
| ZNF189       | -0.040622002 | -0.730669876 | 0.465510478 | 0.646731248 | no |
| FOXR1        | -0.040602999 | -0.7303275   | 0.465719392 | 0.646979668 | no |
| UVSSA        | -0.040589989 | -0.730093107 | 0.465862447 | 0.647136568 | no |
| KRT71        | -0.040576504 | -0.729850154 | 0.466010751 | 0.647300741 | no |
| CLCA4        | -0.040569862 | -0.729730492 | 0.466083806 | 0.647360375 | no |
| ADAMTS3      | 0.040565214  | 0.729646743  | 0.466134939 | 0.647389555 | no |
| EVI2A        | 0.040561955  | 0.729588022  | 0.466170793 | 0.647397513 | no |
| CYP4F8       | -0.040551027 | -0.729391146 | 0.466291014 | 0.647467329 | no |
| SSTR4        | -0.040550029 | -0.729373171 | 0.466301991 | 0.647467329 | no |
| LINC00521    | -0.04054917  | -0.729357686 | 0.466311447 | 0.647467329 | no |
| ARMC8        | -0.040533528 | -0.729075872 | 0.466483568 | 0.647591568 | no |
| ALDH3B1      | 0.040533236  | 0.729070619  | 0.466486777 | 0.647591568 | no |
| PPAPDC3      | -0.040532823 | -0.729063174 | 0.466491325 | 0.647591568 | no |
| SPEF1        | 0.040514615  | 0.728735121  | 0.466691734 | 0.647827933 | no |
| ADNP         | -0.040506677 | -0.728592117 | 0.466779111 | 0.647907374 | no |
| LINC00238    | 0.040501784  | 0.728503954  | 0.466832983 | 0.647940303 | no |
| FOXH1        | 0.040493933  | 0.728362516  | 0.466919417 | 0.648018418 | no |
| GTF2H2C      | -0.040446991 | -0.727516778 | 0.467436444 | 0.64865781  | no |
| DRG2         | 0.040443998  | 0.727462858  | 0.467469418 | 0.64865781  | no |
| LOC145474    | 0.04044154   | 0.727418575  | 0.467496499 | 0.64865781  | no |
| SLC26A6      | 0.040439859  | 0.727388279  | 0.467515028 | 0.64865781  | no |
| OR11L1       | -0.040438406 | -0.727362105 | 0.467531035 | 0.64865781  | no |
| GINS2        | -0.040422221 | -0.727070508 | 0.467709391 | 0.648826267 | no |
| AQP4-AS1     | -0.040419617 | -0.727023608 | 0.467738081 | 0.648826267 | no |
| TMEM8C       | -0.040419169 | -0.727015526 | 0.467743025 | 0.648826267 | no |
| NXPE4        | -0.040413801 | -0.726918818 | 0.467802188 | 0.648866453 | no |
| PDE1A        | -0.040407491 | -0.726805138 | 0.467871739 | 0.648921042 | no |
| SMLR1        | -0.040394696 | -0.726574621 | 0.468012789 | 0.649074784 | no |
| LINC00668    | -0.040390822 | -0.726504812 | 0.468055509 | 0.649092144 | no |
| FAM47E-STBD1 | 0.040388037  | 0.726454648  | 0.468086209 | 0.649092832 | no |
| TACC1        | 0.040379356  | 0.726298242  | 0.468181934 | 0.649183685 | no |
| NEURL1B      | 0.040360271  | 0.72595441   | 0.468392407 | 0.64939374  | no |
| HIST1H2AD    | 0.04036014   | 0.725952042  | 0.468393856 | 0.64939374  | no |
| ACY1         | 0.040347043  | 0.72571609   | 0.468538323 | 0.649552128 | no |
| MLH3         | -0.040336042 | -0.725517899 | 0.468659688 | 0.649678472 | no |

|              |              |              |             |             |    |
|--------------|--------------|--------------|-------------|-------------|----|
| FM05         | -0.040327126 | -0.725357258 | 0.468758072 | 0.649772944 | no |
| FAF1         | 0.040307302  | 0.725000108  | 0.468976848 | 0.650034275 | no |
| COG2         | -0.040276542 | -0.724445933 | 0.469316426 | 0.65038589  | no |
| NACC2        | 0.040275846  | 0.724433405  | 0.469324105 | 0.65038589  | no |
| SNORD11B     | 0.040269923  | 0.724326691  | 0.469389511 | 0.65038589  | no |
| VASH2        | 0.040267618  | 0.724285165  | 0.469414965 | 0.65038589  | no |
| CLCA3P       | 0.040266966  | 0.724273405  | 0.469422173 | 0.65038589  | no |
| VAMP7        | -0.040265695 | -0.724250518 | 0.469436202 | 0.65038589  | no |
| ENKD1        | -0.040265137 | -0.724240459 | 0.469442368 | 0.65038589  | no |
| BTF3L4       | 0.04025831   | 0.724117475  | 0.469517758 | 0.650448407 | no |
| LOC100131691 | 0.040248918  | 0.723948256  | 0.469621501 | 0.650550192 | no |
| MIR211       | -0.040234913 | -0.723695951 | 0.469776205 | 0.650722554 | no |
| CCDC7        | 0.040225107  | 0.723519278  | 0.469884551 | 0.650822966 | no |
| TK2          | 0.040220605  | 0.723438168  | 0.469934298 | 0.650822966 | no |
| PRDX3        | 0.04022013   | 0.723429611  | 0.469939546 | 0.650822966 | no |
| RAB40C       | -0.04020685  | -0.723190362 | 0.4700863   | 0.650950977 | no |
| COG5         | -0.040206283 | -0.72318016  | 0.470092558 | 0.650950977 | no |
| MAGI2-AS3    | -0.040197853 | -0.723028287 | 0.470185729 | 0.651038046 | no |
| VGLL1        | -0.040190303 | -0.722892252 | 0.470269194 | 0.651075449 | no |
| F8           | 0.040188201  | 0.722854384  | 0.470292428 | 0.651075449 | no |
| RNF113B      | -0.040187188 | -0.722836132 | 0.470303628 | 0.651075449 | no |
| RPL29P2      | -0.040166588 | -0.722465019 | 0.470531374 | 0.651346846 | no |
| LRRC52       | -0.040163974 | -0.722417913 | 0.470560287 | 0.651346846 | no |
| C5orf48      | -0.040149919 | -0.722164703 | 0.470715718 | 0.651514789 | no |
| CUL5         | -0.04014752  | -0.722121489 | 0.470742248 | 0.651514789 | no |
| IGDCC4       | 0.040140579  | 0.721996437  | 0.470819023 | 0.651527336 | no |
| POU5F1P3     | -0.040139034 | -0.7219686   | 0.470836115 | 0.651527336 | no |
| OPN1MW       | -0.040138478 | -0.721958587 | 0.470842262 | 0.651527336 | no |
| SYNJ2BP      | -0.040119855 | -0.72162308  | 0.471048286 | 0.651770456 | no |
| NRG4         | -0.040116436 | -0.721561485 | 0.471086115 | 0.651780834 | no |
| HPX          | 0.04008981   | 0.721081802  | 0.471380772 | 0.652129691 | no |
| ZNF716       | -0.040088168 | -0.721052221 | 0.471398946 | 0.652129691 | no |
| COL23A1      | -0.040085339 | -0.721001251 | 0.471430263 | 0.652131036 | no |
| ISM1-AS1     | -0.040082293 | -0.720946389 | 0.471463971 | 0.652135689 | no |
| SNORD90      | 0.040078344  | 0.720875237  | 0.471507691 | 0.652154189 | no |
| MIR548K      | -0.040070689 | -0.720737331 | 0.471592435 | 0.652164045 | no |
| NBPF14       | 0.040070586  | 0.720735476  | 0.471593574 | 0.652164045 | no |
| LOC100506071 | -0.040069477 | -0.720715493 | 0.471605855 | 0.652164045 | no |
| MCM2         | -0.040062313 | -0.720586433 | 0.471685172 | 0.652231761 | no |
| LINC00466    | -0.040053755 | -0.720432249 | 0.471779939 | 0.65232083  | no |
| TNS1         | 0.040044873  | 0.720272243  | 0.471878295 | 0.652414851 | no |
| HOXA5        | 0.040031021  | 0.720022682  | 0.472031724 | 0.652584997 | no |
| TMEM9B       | -0.040025323 | -0.719920042 | 0.472094835 | 0.652630265 | no |
| BCORP1       | 0.040012053  | 0.719680969  | 0.472241852 | 0.652791513 | no |
| MIR4524B     | -0.039994667 | -0.71936776  | 0.472434498 | 0.653015809 | no |
| ACTL9        | -0.039988153 | -0.719250409 | 0.472506689 | 0.65307359  | no |
| PGAM2        | 0.039957469  | 0.718697619  | 0.472846829 | 0.653501685 | no |
| KRT26        | -0.039954652 | -0.718646863 | 0.472878067 | 0.653502832 | no |
| SLC25A38     | -0.039950403 | -0.718570325 | 0.472925174 | 0.653525908 | no |
| MIR98        | -0.03993661  | -0.718321847 | 0.473078124 | 0.653673915 | no |
| GLUD2        | 0.039935259  | 0.718297501  | 0.473093112 | 0.653673915 | no |

|              |              |              |             |             |    |
|--------------|--------------|--------------|-------------|-------------|----|
| CRADD        | -0.03993152  | -0.718230135 | 0.473134585 | 0.653689191 | no |
| GNAS         | -0.039924364 | -0.718101229 | 0.473213949 | 0.653756812 | no |
| LOC100133957 | -0.039911889 | -0.717876492 | 0.473352331 | 0.653905956 | no |
| FAM160B2     | -0.03988405  | -0.717374952 | 0.473661236 | 0.654235085 | no |
| ANKRD20A19P  | -0.039882649 | -0.717349726 | 0.473676776 | 0.654235085 | no |
| KRT6B        | 0.039882187  | 0.717341393  | 0.47368191  | 0.654235085 | no |
| RNF8         | -0.039878838 | -0.717281062 | 0.473719076 | 0.654244372 | no |
| FAM150B      | 0.039866999  | 0.71706779   | 0.473850476 | 0.654383792 | no |
| ATG3         | -0.039843974 | -0.716652978 | 0.474106104 | 0.654669999 | no |
| LOC255654    | -0.039842844 | -0.716632626 | 0.474118648 | 0.654669999 | no |
| NBN          | -0.039838729 | -0.716558486 | 0.474164345 | 0.654691034 | no |
| ZNF423       | -0.039824271 | -0.716298029 | 0.474324903 | 0.654814547 | no |
| ZNF778       | -0.039824218 | -0.716297075 | 0.474325491 | 0.654814547 | no |
| ADC          | -0.039822442 | -0.716265092 | 0.474345208 | 0.654814547 | no |
| PRMT2        | 0.039815819  | 0.71614577   | 0.474418776 | 0.654874038 | no |
| FUT8-AS1     | -0.039802167 | -0.715899826 | 0.47457043  | 0.655041304 | no |
| ZFAND5       | -0.039789298 | -0.715668001 | 0.474713402 | 0.65514213  | no |
| ZNF208       | -0.03978878  | -0.71565867  | 0.474719158 | 0.65514213  | no |
| LOC100133050 | -0.039787361 | -0.715633097 | 0.474734931 | 0.65514213  | no |
| PDCD5        | 0.039773436  | 0.715382245  | 0.474889669 | 0.655313591 | no |
| ZNF654       | 0.039752144  | 0.714998666  | 0.475126333 | 0.655530459 | no |
| HNRNPCL1     | -0.039747792 | -0.714920273 | 0.475174709 | 0.655530459 | no |
| DBNDD1       | 0.039747369  | 0.714912643  | 0.475179417 | 0.655530459 | no |
| AMIGO3       | 0.039745072  | 0.714871262  | 0.475204955 | 0.655530459 | no |
| NOV          | 0.039743472  | 0.714842447  | 0.475222737 | 0.655530459 | no |
| PPY          | 0.039742833  | 0.714830934  | 0.475229842 | 0.655530459 | no |
| LILRA4       | 0.039738152  | 0.714746607  | 0.475281886 | 0.65556017  | no |
| SOSTDC1      | -0.039731769 | -0.714631617 | 0.475352859 | 0.655615986 | no |
| PXT1         | -0.039728548 | -0.714573591 | 0.475388676 | 0.655623309 | no |
| FAM90A1      | -0.039704863 | -0.714146904 | 0.475652094 | 0.655907409 | no |
| TMEM45B      | -0.039701395 | -0.714084427 | 0.475690671 | 0.655907409 | no |
| HOXC12       | -0.039700264 | -0.714064053 | 0.475703251 | 0.655907409 | no |
| C3orf62      | -0.039695497 | -0.71397819  | 0.475756273 | 0.655907409 | no |
| ABCG2        | -0.039693576 | -0.713943572 | 0.47577765  | 0.655907409 | no |
| C9orf135     | 0.039692031  | 0.713915734  | 0.475794841 | 0.655907409 | no |
| RASIP1       | 0.039690819  | 0.713893916  | 0.475808316 | 0.655907409 | no |
| SCGB2B2      | -0.039682227 | -0.713739128 | 0.475903912 | 0.655972457 | no |
| THOC1        | -0.039681091 | -0.713718668 | 0.475916549 | 0.655972457 | no |
| FOSB         | 0.03967768   | 0.713657206  | 0.475954511 | 0.65598271  | no |
| CCDC112      | -0.039674585 | -0.71360145  | 0.47598895  | 0.655988106 | no |
| CCDC24       | 0.039666672  | 0.713458906  | 0.476077004 | 0.656067386 | no |
| MUC21        | -0.03965438  | -0.713237464 | 0.476213811 | 0.656213837 | no |
| MIR1247      | -0.039627858 | -0.712759681 | 0.47650906  | 0.656578587 | no |
| PCDHGB3      | 0.039612323  | 0.712479838  | 0.476682038 | 0.656774823 | no |
| COG4         | 0.039602375  | 0.712300618  | 0.476792837 | 0.656867967 | no |
| TIMMDC1      | 0.039600765  | 0.712271611  | 0.476810771 | 0.656867967 | no |
| ITIH1        | -0.039595658 | -0.712179613 | 0.476867654 | 0.6568684   | no |
| PDLIM7       | 0.039595248  | 0.712172235  | 0.476872216 | 0.6568684   | no |
| CLK2P        | -0.039577067 | -0.71184471  | 0.477074755 | 0.657105272 | no |
| ANXA10       | 0.039543326  | 0.711236886  | 0.477450755 | 0.657581017 | no |
| NLGN4Y-AS1   | -0.039538461 | -0.711149241 | 0.477504986 | 0.657613563 | no |

|              |              |              |             |             |    |
|--------------|--------------|--------------|-------------|-------------|----|
| SPRR2A       | -0.039530185 | -0.711000159 | 0.477597239 | 0.657687941 | no |
| GPR37L1      | -0.039527003 | -0.710942827 | 0.477632719 | 0.657687941 | no |
| COPS4        | 0.039520154  | 0.71081946   | 0.47770907  | 0.657687941 | no |
| SLC5A8       | -0.039520075 | -0.71081803  | 0.477709954 | 0.657687941 | no |
| PIGL         | 0.039519891  | 0.710814712  | 0.477712008 | 0.657687941 | no |
| MTERFD2      | -0.039514206 | -0.7107123   | 0.477775395 | 0.657733074 | no |
| LINC00624    | -0.039509471 | -0.710627014 | 0.477828186 | 0.65775839  | no |
| DAD1         | 0.039504875  | 0.710544213  | 0.477879441 | 0.65775839  | no |
| KRTAP10-12   | -0.039504323 | -0.71053426  | 0.477885603 | 0.65775839  | no |
| LRRC66       | 0.039497438  | 0.710410239  | 0.477962381 | 0.657821936 | no |
| ABHD16B      | 0.039488898  | 0.710256397  | 0.478057629 | 0.657910893 | no |
| SRCRB4D      | 0.039484621  | 0.710179349  | 0.478105337 | 0.657934417 | no |
| C20orf166    | -0.039458642 | -0.709711358 | 0.478395165 | 0.658291106 | no |
| BMI1         | -0.039424878 | -0.709103124 | 0.47877199  | 0.658767453 | no |
| USP17L10     | -0.03942094  | -0.709032187 | 0.478815949 | 0.65878576  | no |
| NOS1AP       | -0.039416316 | -0.708948894 | 0.478867568 | 0.658814602 | no |
| RNF216P1     | 0.039409093  | 0.708818772  | 0.478948214 | 0.658876299 | no |
| MED28        | -0.039406808 | -0.708777605 | 0.47897373  | 0.658876299 | no |
| LOC100507117 | -0.039401276 | -0.708677958 | 0.479035495 | 0.658919087 | no |
| REXO4        | -0.039396223 | -0.708586925 | 0.479091924 | 0.65895453  | no |
| FUNDC1       | 0.039387154  | 0.708423555  | 0.479193203 | 0.659010845 | no |
| ATPAF2       | 0.039387065  | 0.708421954  | 0.479194196 | 0.659010845 | no |
| IQCJ         | -0.039374282 | -0.708191682 | 0.479336971 | 0.659165014 | no |
| FAM71E2      | -0.039350032 | -0.707754838 | 0.479607888 | 0.659495369 | no |
| DPY19L2      | -0.039334957 | -0.707483276 | 0.479776346 | 0.659645522 | no |
| ALPPL2       | -0.039334767 | -0.707479847 | 0.479778473 | 0.659645522 | no |
| TMPPE        | 0.039329668  | 0.707388002  | 0.479835455 | 0.659681663 | no |
| ABCF3        | -0.03932577  | -0.707317777 | 0.479879025 | 0.659699362 | no |
| ART1         | -0.039298494 | -0.706826427 | 0.480183941 | 0.660050416 | no |
| CCNE2        | -0.039295423 | -0.70677112  | 0.48021827  | 0.660050416 | no |
| LOC100506990 | -0.039294685 | -0.706757815 | 0.480226528 | 0.660050416 | no |
| STX8         | -0.039281806 | -0.706525828 | 0.480370535 | 0.660206125 | no |
| LYPLAL1      | 0.039262723  | 0.706182059  | 0.480583976 | 0.660431551 | no |
| NEIL3        | 0.039260356  | 0.706139418  | 0.480610454 | 0.660431551 | no |
| ERLIN2       | 0.039258899  | 0.706113178  | 0.480626749 | 0.660431551 | no |
| UTY          | -0.039249532 | -0.705944437 | 0.480731542 | 0.660533314 | no |
| AGR2         | 0.039239934  | 0.705771546  | 0.480838924 | 0.660602859 | no |
| RCCD1        | 0.039239513  | 0.705763965  | 0.480843633 | 0.660602859 | no |
| TUSC5        | -0.039224092 | -0.705486166 | 0.481016203 | 0.6607977   | no |
| SLC2A11      | 0.039211013  | 0.705250568  | 0.481162583 | 0.660956541 | no |
| FBN3         | 0.039201591  | 0.705080837  | 0.481268055 | 0.661022396 | no |
| OR2M7        | 0.039201235  | 0.705074424  | 0.481272041 | 0.661022396 | no |
| C17orf61-PLS | -0.039182976 | -0.704745526 | 0.481476456 | 0.661103727 | no |
| EXOSC4       | -0.039182933 | -0.704744739 | 0.481476945 | 0.661103727 | no |
| ARL5C        | -0.039181996 | -0.704727857 | 0.481487439 | 0.661103727 | no |
| RIBC1        | 0.039181708  | 0.704722674  | 0.481490661 | 0.661103727 | no |
| TIPARP-AS1   | -0.039181487 | -0.704718696 | 0.481493134 | 0.661103727 | no |
| ATG2A        | -0.039177357 | -0.704644306 | 0.481539376 | 0.661103727 | no |
| LOC338758    | -0.039176713 | -0.704632702 | 0.481546589 | 0.661103727 | no |
| KRTAP3-1     | -0.039167238 | -0.704462027 | 0.481652693 | 0.661146591 | no |
| GSC2         | -0.039163337 | -0.704391745 | 0.48169639  | 0.661146591 | no |

|              |              |              |             |             |    |
|--------------|--------------|--------------|-------------|-------------|----|
| CCND1        | -0.039162501 | -0.704376683 | 0.481705755 | 0.661146591 | no |
| TMEM129      | 0.039160995  | 0.704349555  | 0.481722622 | 0.661146591 | no |
| DSG3         | -0.03915758  | -0.70428804  | 0.48176087  | 0.661146591 | no |
| TXNDC15      | 0.039157444  | 0.704285589  | 0.481762394 | 0.661146591 | no |
| EI24         | 0.039148405  | 0.704122762  | 0.481863645 | 0.661243317 | no |
| C10orf114    | 0.039135346  | 0.703887526  | 0.482009941 | 0.661401842 | no |
| LOC100132831 | -0.039128036 | -0.703755845 | 0.482091846 | 0.661471995 | no |
| ATP6V1B2     | 0.039103566  | 0.703315053  | 0.482366071 | 0.661806003 | no |
| NRCAM        | 0.039089329  | 0.703058611  | 0.482525648 | 0.661982682 | no |
| UFC1         | 0.039079109  | 0.702874508  | 0.482640228 | 0.662052841 | no |
| ELOVL7       | 0.039077427  | 0.7028442    | 0.482659092 | 0.662052841 | no |
| M1           | -0.039076525 | -0.702827951 | 0.482669206 | 0.662052841 | no |
| APOC4-APOC2  | 0.03907171   | 0.702741222  | 0.48272319  | 0.662084631 | no |
| DKFZp686K168 | 0.039068959  | 0.702691662  | 0.48275404  | 0.662084689 | no |
| HOXC5        | 0.039065632  | 0.702631731  | 0.482791348 | 0.662093603 | no |
| IGFALS       | -0.039054335 | -0.70242824  | 0.482918033 | 0.662185838 | no |
| LINC00421    | -0.03905408  | -0.702423644 | 0.482920895 | 0.662185838 | no |
| EML1         | -0.039051392 | -0.702375225 | 0.482951041 | 0.662185838 | no |
| PRAME        | -0.039048097 | -0.702315881 | 0.482987991 | 0.662194253 | no |
| CRELD2       | -0.039042815 | -0.70222072  | 0.483047246 | 0.662211647 | no |
| MAP9         | -0.039040183 | -0.702173317 | 0.483076764 | 0.662211647 | no |
| RIMBP3       | 0.039038725  | 0.702147055  | 0.483093118 | 0.662211647 | no |
| CLDN25       | -0.039016078 | -0.701739096 | 0.483347202 | 0.662486352 | no |
| TEKT4        | 0.039015367  | 0.7017263    | 0.483355172 | 0.662486352 | no |
| HRCT1        | 0.039010728  | 0.701642723  | 0.483407235 | 0.662515457 | no |
| GLDN         | 0.038980794  | 0.70110352   | 0.483743195 | 0.662933618 | no |
| LOC100506834 | 0.038973947  | 0.700980184  | 0.483820059 | 0.662996677 | no |
| BMPER        | -0.038965038 | -0.700819714 | 0.483920076 | 0.663091453 | no |
| LOC101054525 | 0.038953777  | 0.700616867  | 0.484046521 | 0.663222428 | no |
| DCAF13       | -0.038948241 | -0.700517135 | 0.484108696 | 0.663265331 | no |
| FAM226B      | -0.038945249 | -0.700463251 | 0.48414229  | 0.663269074 | no |
| FOXI2        | -0.038931358 | -0.700213026 | 0.484298311 | 0.663440527 | no |
| AKR7A2P1     | -0.038924131 | -0.700082849 | 0.484379489 | 0.66350944  | no |
| DEPDC1B      | -0.038904372 | -0.699726918 | 0.484601487 | 0.663771227 | no |
| CDRT15       | -0.038889834 | -0.699465051 | 0.484764851 | 0.663943498 | no |
| NFU1         | -0.038886099 | -0.699397776 | 0.484806825 | 0.663943498 | no |
| CD2BP2       | 0.038880499  | 0.699296888  | 0.484869774 | 0.663943498 | no |
| FAM22G       | -0.038877851 | -0.699249204 | 0.484899529 | 0.663943498 | no |
| LOC284581    | -0.038877374 | -0.699240609 | 0.484904892 | 0.663943498 | no |
| FANCL        | 0.038876687  | 0.699228222  | 0.484912621 | 0.663943498 | no |
| CAPN8        | -0.038873751 | -0.699175349 | 0.484945615 | 0.663946373 | no |
| DUOX1        | -0.03886606  | -0.699036798 | 0.485032079 | 0.664022449 | no |
| DGKD         | -0.03885914  | -0.698912154 | 0.485109871 | 0.664086645 | no |
| MYO15A       | -0.038855287 | -0.698842742 | 0.485153195 | 0.66410365  | no |
| MFSD8        | 0.03885198   | 0.69878319   | 0.485190367 | 0.664112233 | no |
| NUDT17       | 0.03883512   | 0.698479491  | 0.485379956 | 0.664329425 | no |
| PKP3         | -0.038818392 | -0.698178164 | 0.485568103 | 0.664530264 | no |
| OR14J1       | -0.038816575 | -0.698145442 | 0.485588537 | 0.664530264 | no |
| VAMP4        | 0.038809002  | 0.698009016  | 0.485673737 | 0.664604538 | no |
| CES3         | -0.038792166 | -0.697705762 | 0.48586315  | 0.664790597 | no |
| UBXN2B       | -0.038791418 | -0.697692283 | 0.48587157  | 0.664790597 | no |

|              |              |              |             |             |    |
|--------------|--------------|--------------|-------------|-------------|----|
| MS4A5        | -0.038787758 | -0.697626349 | 0.485912759 | 0.664804628 | no |
| CD300LD      | -0.038781663 | -0.697516572 | 0.485981339 | 0.664856131 | no |
| PSMB6        | -0.038774561 | -0.69738864  | 0.486061269 | 0.664923152 | no |
| STX2         | -0.038770141 | -0.697309023 | 0.486111016 | 0.664948879 | no |
| KRTAP1-1     | -0.038762908 | -0.697178733 | 0.48619243  | 0.664973831 | no |
| MAGEA6       | -0.038761946 | -0.697161403 | 0.48620326  | 0.664973831 | no |
| OR4C46       | -0.038760273 | -0.697131282 | 0.486222083 | 0.664973831 | no |
| USP47        | -0.03875156  | -0.696974327 | 0.486320173 | 0.665065659 | no |
| CCDC107      | 0.038746951  | 0.696891309  | 0.486372059 | 0.665094294 | no |
| GPN3         | 0.038727559  | 0.69654201   | 0.486590407 | 0.665323552 | no |
| CCDC67       | -0.038724637 | -0.696489374 | 0.486623314 | 0.665323552 | no |
| CRCT1        | -0.038723814 | -0.696474544 | 0.486632586 | 0.665323552 | no |
| LOC100507577 | 0.038700082  | 0.696047072  | 0.486899884 | 0.665646655 | no |
| VPS39        | -0.038695325 | -0.695961395 | 0.486953468 | 0.665677564 | no |
| LOC100216479 | -0.038691122 | -0.695885686 | 0.48700082  | 0.66569995  | no |
| CENPL        | -0.038682975 | -0.695738933 | 0.487092614 | 0.665747613 | no |
| PIK3C2G      | -0.038682529 | -0.69573089  | 0.487097644 | 0.665747613 | no |
| PCDHB1       | 0.03867435   | 0.695583578  | 0.487189797 | 0.66583122  | no |
| VPS29        | 0.03866804   | 0.695469903  | 0.487260915 | 0.665886069 | no |
| MYH8         | -0.038663258 | -0.695383767 | 0.487314807 | 0.665917372 | no |
| ZSWIM3       | -0.038658374 | -0.695295794 | 0.487369852 | 0.665929866 | no |
| DYRK1B       | -0.038656948 | -0.695270111 | 0.487385922 | 0.665929866 | no |
| SNX29P1      | -0.038644053 | -0.695037838 | 0.487531275 | 0.665990715 | no |
| XP01         | -0.038642609 | -0.695011842 | 0.487547544 | 0.665990715 | no |
| KIF4A        | 0.038640654  | 0.694976611  | 0.487569594 | 0.665990715 | no |
| RPL11        | -0.038637714 | -0.694923672 | 0.487602727 | 0.665990715 | no |
| KIR2DS3      | 0.038637195  | 0.694914316  | 0.487608582 | 0.665990715 | no |
| ARHGEF38-IT1 | -0.038636502 | -0.694901837 | 0.487616393 | 0.665990715 | no |
| CIZ1         | -0.038631448 | -0.69481079  | 0.48767338  | 0.666026221 | no |
| IK           | -0.038626921 | -0.694729249 | 0.487724421 | 0.666032776 | no |
| UPK1A        | -0.038625525 | -0.694704102 | 0.487740162 | 0.666032776 | no |
| CACNA1G      | -0.038617315 | -0.694556232 | 0.487832731 | 0.666101785 | no |
| PRG3         | -0.038611903 | -0.694458737 | 0.487893768 | 0.666101785 | no |
| TNFRSF19     | 0.038611724  | 0.694455523  | 0.487895781 | 0.666101785 | no |
| COL17A1      | -0.038610049 | -0.694425345 | 0.487914676 | 0.666101785 | no |
| ZFP90        | -0.038600339 | -0.694250447 | 0.488024185 | 0.666195355 | no |
| PRLR         | -0.038598475 | -0.694216867 | 0.488045213 | 0.666195355 | no |
| VSX1         | -0.038576166 | -0.693815025 | 0.488296878 | 0.666496551 | no |
| ADAD2        | -0.038566642 | -0.69364348  | 0.488404334 | 0.666600885 | no |
| HFE2         | -0.038560018 | -0.693524175 | 0.488479075 | 0.666660557 | no |
| SLC22A11     | 0.038551033  | 0.693362329  | 0.488580476 | 0.666756604 | no |
| LDLRAD2      | 0.038542584  | 0.693210133  | 0.488675841 | 0.666844403 | no |
| STX7         | -0.038535431 | -0.693081305 | 0.488756572 | 0.666887282 | no |
| TAAR2        | -0.038534302 | -0.693060954 | 0.488769326 | 0.666887282 | no |
| C1orf101     | 0.038527019  | 0.692929781  | 0.488851535 | 0.666957107 | no |
| ELOVL6       | -0.038519326 | -0.692791208 | 0.48893839  | 0.667033259 | no |
| FAM189B      | 0.03850554   | 0.692542901  | 0.489094045 | 0.66719529  | no |
| FAIM         | 0.038503308  | 0.692502698  | 0.48911925  | 0.66719529  | no |
| CALHM3       | -0.038497587 | -0.69239965  | 0.489183857 | 0.667204853 | no |
| IPO8         | -0.038497189 | -0.692392481 | 0.489188352 | 0.667204853 | no |
| TXLNG2P      | 0.038486344  | 0.692197131  | 0.489310841 | 0.667329565 | no |

|           |              |              |             |             |    |
|-----------|--------------|--------------|-------------|-------------|----|
| IFNA4     | 0.038481594  | 0.692111577  | 0.489364491 | 0.667360383 | no |
| PXK       | -0.038475744 | -0.6920062   | 0.489430576 | 0.667408154 | no |
| TCP10     | -0.038470888 | -0.691918731 | 0.489485434 | 0.66744061  | no |
| PNLIPRP1  | -0.03846767  | -0.69186077  | 0.489521788 | 0.667447832 | no |
| KRTAP4-9  | -0.038437857 | -0.691323782 | 0.489858658 | 0.667864773 | no |
| XAGE2     | 0.038434649  | 0.691265991  | 0.489894919 | 0.667871842 | no |
| SSX3      | -0.03843013  | -0.691184597 | 0.489945994 | 0.667885058 | no |
| MTBP      | -0.038428292 | -0.69115149  | 0.489966769 | 0.667885058 | no |
| PISD      | -0.038424877 | -0.691089973 | 0.490005373 | 0.667895317 | no |
| C16orf71  | 0.038407498  | 0.690776956  | 0.490201828 | 0.668120718 | no |
| FXR1      | -0.038402194 | -0.690681413 | 0.490261801 | 0.668160085 | no |
| GPR32     | -0.038393615 | -0.690526888 | 0.490358806 | 0.668228786 | no |
| LOC613037 | 0.038389839  | 0.690458868  | 0.49040151  | 0.668228786 | no |
| RABGEF1   | 0.038389487  | 0.690452526  | 0.490405491 | 0.668228786 | no |
| TP73      | -0.038366607 | -0.690040411 | 0.490664266 | 0.668539006 | no |
| SUMO1P3   | -0.038351499 | -0.689768287 | 0.490835177 | 0.668729479 | no |
| CGB1      | -0.038348045 | -0.689706073 | 0.490874256 | 0.668736945 | no |
| GHRH      | -0.038345514 | -0.689660487 | 0.490902892 | 0.668736945 | no |
| PCNXL3    | 0.038331096  | 0.689400794  | 0.491066038 | 0.668916792 | no |
| ENO1-AS1  | -0.038312815 | -0.689071516 | 0.491272942 | 0.669146733 | no |
| FZD10     | 0.038310679  | 0.68903305   | 0.491297115 | 0.669146733 | no |
| AGGF1     | 0.038303373  | 0.688901458  | 0.491379817 | 0.669216962 | no |
| OR11G2    | -0.038290024 | -0.68866101  | 0.491530952 | 0.669380374 | no |
| PSG10P    | 0.038286245  | 0.688592956  | 0.491573732 | 0.669396215 | no |
| HOGA1     | -0.038280421 | -0.688488052 | 0.49163968  | 0.669420121 | no |
| SLC5A9    | 0.038279193  | 0.688465935  | 0.491653585 | 0.669420121 | no |
| OR5H6     | -0.038262997 | -0.688174214 | 0.491837005 | 0.669627436 | no |
| DEFA10P   | -0.038257529 | -0.688075723 | 0.49189894  | 0.669669335 | no |
| MGC27382  | 0.038222656  | 0.687447604  | 0.492294024 | 0.670164747 | no |
| KRTAP10-2 | -0.03820606  | -0.687148676 | 0.492482108 | 0.670352651 | no |
| SNRPG     | -0.038204972 | -0.687129079 | 0.49249444  | 0.670352651 | no |
| LGI4      | 0.038192251  | 0.686899957  | 0.49263863  | 0.670505869 | no |
| LOC147646 | 0.038189454  | 0.686849579  | 0.492670338 | 0.670505869 | no |
| RAB44     | 0.038186784  | 0.68680149   | 0.492700604 | 0.670505869 | no |
| CXADRP3   | -0.038154723 | -0.686224024 | 0.49306414  | 0.67095811  | no |
| PPP4R2    | 0.038150432  | 0.686146736  | 0.493112807 | 0.670981849 | no |
| ATP4B     | 0.038145974  | 0.686066441  | 0.493163369 | 0.671008165 | no |
| SNORD15A  | -0.038129688 | -0.6857731   | 0.493348114 | 0.671203359 | no |
| TLL2      | 0.038127821  | 0.685739475  | 0.493369292 | 0.671203359 | no |
| MIR663B   | -0.038113179 | -0.685475748 | 0.493535422 | 0.671386868 | no |
| CYP11B2   | -0.038107232 | -0.685368631 | 0.493602906 | 0.67143617  | no |
| CHRNA3    | -0.038086859 | -0.685001697 | 0.493834115 | 0.671708162 | no |
| C4orf29   | -0.038078678 | -0.684854343 | 0.493926981 | 0.671791959 | no |
| IRF6      | 0.038075178  | 0.684791307  | 0.49396671  | 0.671803479 | no |
| KRT4      | -0.038071208 | -0.684719794 | 0.494011784 | 0.671822265 | no |
| LSAMP-AS3 | -0.038060674 | -0.684530062 | 0.494131383 | 0.671942391 | no |
| OVOL1     | -0.038041689 | -0.684188118 | 0.494346967 | 0.672181944 | no |
| PCNP      | -0.038039652 | -0.684151432 | 0.494370099 | 0.672181944 | no |
| MIR548I3  | -0.038035076 | -0.684069005 | 0.494422075 | 0.672210085 | no |
| VANGL1    | -0.038012618 | -0.683664522 | 0.494677175 | 0.67251437  | no |
| C1QTNF7   | 0.038002869  | 0.683488926  | 0.494787942 | 0.672586873 | no |

|              |              |              |             |             |    |
|--------------|--------------|--------------|-------------|-------------|----|
| RAD54B       | 0.038002415  | 0.683480753  | 0.494793097 | 0.672586873 | no |
| GPX4         | -0.037990819 | -0.683271889 | 0.494924868 | 0.672723442 | no |
| C1orf194     | 0.037979718  | 0.68307194   | 0.495051032 | 0.672852374 | no |
| FLNB         | -0.03797513  | -0.682989311 | 0.495103175 | 0.672880689 | no |
| PRDM13       | 0.037965859  | 0.682822338  | 0.495208551 | 0.672981343 | no |
| OR6A2        | -0.03795775  | -0.682676272 | 0.495300742 | 0.673039983 | no |
| LINC00161    | 0.037956554  | 0.682654736  | 0.495314335 | 0.673039983 | no |
| NHLH2        | -0.037948618 | -0.682511808 | 0.495404556 | 0.673054157 | no |
| RWDD2B       | 0.037946455  | 0.682472849  | 0.49542915  | 0.673054157 | no |
| PHOSPHO2     | -0.037944004 | -0.682428691 | 0.495457027 | 0.673054157 | no |
| PTPRM        | -0.037942394 | -0.682399691 | 0.495475334 | 0.673054157 | no |
| MTMR6        | 0.037941864  | 0.682390153  | 0.495481356 | 0.673054157 | no |
| RALGPS2      | 0.037938162  | 0.682323467  | 0.495523457 | 0.673068804 | no |
| CCNK         | -0.037909643 | -0.681809827 | 0.495847799 | 0.673455365 | no |
| IDNK         | -0.037907628 | -0.681773531 | 0.495870723 | 0.673455365 | no |
| OR10V1       | -0.037889069 | -0.681439253 | 0.496081871 | 0.673699557 | no |
| OR4M1        | -0.037882263 | -0.681316678 | 0.496159308 | 0.673762144 | no |
| BLOC1S5-TXND | -0.037879505 | -0.681267006 | 0.496190691 | 0.673762187 | no |
| CASC1        | 0.037872524  | 0.681141276  | 0.49627013  | 0.673827481 | no |
| RORA         | -0.037859283 | -0.680902782 | 0.496420837 | 0.673989526 | no |
| PTCHD3P1     | 0.037854316  | 0.680813332  | 0.496477367 | 0.674023696 | no |
| EMC1         | 0.037849689  | 0.680729997  | 0.496530036 | 0.674052619 | no |
| PSG2         | 0.037846791  | 0.680677799  | 0.496563028 | 0.674054827 | no |
| ZNF132       | 0.03783759   | 0.680512071  | 0.496667783 | 0.674154444 | no |
| CALR3        | -0.03782491  | -0.680283695 | 0.496812157 | 0.674307823 | no |
| SBN01        | -0.037804961 | -0.679924407 | 0.497039336 | 0.674538353 | no |
| LOC729683    | -0.037803571 | -0.679899371 | 0.497055169 | 0.674538353 | no |
| C17orf112    | -0.037801728 | -0.679866167 | 0.497076167 | 0.674538353 | no |
| FAR1         | -0.037796122 | -0.679765199 | 0.497140021 | 0.674582409 | no |
| ZNF497       | -0.037783824 | -0.679543713 | 0.497280111 | 0.674716117 | no |
| DEFB103A     | 0.03778196   | 0.679510137  | 0.497301349 | 0.674716117 | no |
| PCDHA7       | 0.037773911  | 0.679365167  | 0.497393056 | 0.67479794  | no |
| MIR215       | -0.0377486   | -0.678909296 | 0.497681494 | 0.675079987 | no |
| SLC7A9       | 0.037747531  | 0.678890049  | 0.497693674 | 0.675079987 | no |
| LOC100128361 | -0.037747398 | -0.678887655 | 0.497695189 | 0.675079987 | no |
| SPINT4       | 0.037744041  | 0.678827194  | 0.497733451 | 0.675089277 | no |
| IQCA1        | -0.037734122 | -0.678648536 | 0.497846522 | 0.675200026 | no |
| C9orf117     | 0.037723428  | 0.678455941  | 0.497968429 | 0.675313255 | no |
| UHMK1        | -0.037716852 | -0.678337488 | 0.498043415 | 0.675313255 | no |
| TSC22D2      | 0.037713971  | 0.678285612  | 0.498076256 | 0.675313255 | no |
| ASPRV1       | -0.037713264 | -0.678272872 | 0.498084322 | 0.675313255 | no |
| CROCCP2      | -0.037711913 | -0.67824855  | 0.49809972  | 0.675313255 | no |
| TMEM91       | -0.037710262 | -0.678218811 | 0.498118548 | 0.675313255 | no |
| TTY2         | -0.037684311 | -0.677751415 | 0.49841451  | 0.675671875 | no |
| COL18A1-AS1  | 0.037669427  | 0.677483339  | 0.498584303 | 0.67585942  | no |
| UBE2E1       | -0.037649087 | -0.677117016 | 0.498816372 | 0.676056644 | no |
| MLN          | -0.037648852 | -0.677112771 | 0.498819061 | 0.676056644 | no |
| MIR1236      | -0.037648404 | -0.677104711 | 0.498824168 | 0.676056644 | no |
| MRAP         | 0.037636249  | 0.676885791  | 0.498962884 | 0.676202002 | no |
| ALDH9A1      | -0.037628506 | -0.676746341 | 0.499051256 | 0.676279119 | no |
| SNORA5A      | -0.037623278 | -0.676652179 | 0.499110933 | 0.676317344 | no |



|              |              |              |             |             |    |
|--------------|--------------|--------------|-------------|-------------|----|
| LINC00551    | 0.037617554  | 0.676549084  | 0.499176276 | 0.676363239 | no |
| CDX2         | -0.037606089 | -0.67634259  | 0.499307168 | 0.676481746 | no |
| LRRC37A3     | 0.037604378  | 0.676311791  | 0.499326692 | 0.676481746 | no |
| ZNF733P      | 0.037596656  | 0.676172714  | 0.499414862 | 0.676558547 | no |
| GPR115       | 0.037589409  | 0.676042181  | 0.499497623 | 0.676628012 | no |
| DNAJB14      | -0.037585961 | -0.67598008  | 0.499536999 | 0.676638702 | no |
| FAM183A      | 0.037570363  | 0.675699162  | 0.499715139 | 0.676837339 | no |
| STARD7       | -0.037567187 | -0.675641953 | 0.499751422 | 0.676843824 | no |
| FBLIM1       | -0.037543319 | -0.675212089 | 0.50002409  | 0.677170441 | no |
| CALCB        | -0.037532994 | -0.67502613  | 0.500142071 | 0.67728754  | no |
| SND1         | 0.03752743   | 0.67492592   | 0.500205656 | 0.677330965 | no |
| PGA3         | -0.037521858 | -0.674825569 | 0.500269334 | 0.677374512 | no |
| EBP          | -0.037501237 | -0.674454192 | 0.500505029 | 0.677650953 | no |
| FOXD4L1      | -0.037497828 | -0.674392785 | 0.500544006 | 0.677661033 | no |
| KLHL9        | -0.037453261 | -0.673590134 | 0.501053633 | 0.67830826  | no |
| S100A7A      | 0.037435137  | 0.673263713  | 0.501260967 | 0.678546198 | no |
| SNORA70D     | -0.037429435 | -0.673161022 | 0.501326202 | 0.678591762 | no |
| AOC2         | -0.037424448 | -0.673071199 | 0.501383268 | 0.678626263 | no |
| IL2          | 0.037416514  | 0.672928309  | 0.501474054 | 0.678706397 | no |
| ATAD3A       | -0.037401409 | -0.67265628  | 0.501646912 | 0.678897594 | no |
| ATP5L2       | -0.037398374 | -0.672601604 | 0.50168166  | 0.678901867 | no |
| LIMD1        | -0.037389377 | -0.672439578 | 0.501784637 | 0.678998466 | no |
| SPRR2C       | -0.037373088 | -0.672146208 | 0.50197112  | 0.679208043 | no |
| SLN          | 0.037362029  | 0.671947048  | 0.502097739 | 0.679293927 | no |
| C15orf43     | -0.037362023 | -0.671946936 | 0.502097809 | 0.679293927 | no |
| GALR1        | 0.03735546   | 0.671828738  | 0.502172964 | 0.679352837 | no |
| PRAP1        | -0.037347185 | -0.671679703 | 0.502267733 | 0.679430495 | no |
| LOC100506895 | -0.03734283  | -0.671601276 | 0.502317608 | 0.679430495 | no |
| ASMT         | -0.037340206 | -0.67155401  | 0.502347667 | 0.679430495 | no |
| C2CD4A       | 0.037336765  | 0.67149204   | 0.502387079 | 0.679430495 | no |
| ZNF165       | 0.037336646  | 0.671489898  | 0.502388441 | 0.679430495 | no |
| GPSM3        | -0.037327993 | -0.671334061 | 0.502487559 | 0.67952178  | no |
| C17orf64     | 0.037322012  | 0.671226334  | 0.502556084 | 0.679571685 | no |
| WFDC13       | -0.037312495 | -0.671054939 | 0.502665116 | 0.679676357 | no |
| MTG1         | -0.037298751 | -0.670807424 | 0.502822596 | 0.679846518 | no |
| GPR143       | 0.037284481  | 0.670550417  | 0.502986141 | 0.679987351 | no |
| PRSS22       | -0.037284141 | -0.670544293 | 0.502990039 | 0.679987351 | no |
| PCDHB14      | -0.037279704 | -0.670464384 | 0.503040895 | 0.680013327 | no |
| MAGEA4       | -0.0372726   | -0.670336443 | 0.503122325 | 0.680080626 | no |
| HACL1        | 0.037259644  | 0.670103116  | 0.503270848 | 0.680169837 | no |
| SRPK3        | -0.037251154 | -0.669950198 | 0.503368199 | 0.680169837 | no |
| FAM210A      | -0.037251019 | -0.669947783 | 0.503369737 | 0.680169837 | no |
| GFRA3        | -0.037250873 | -0.669945152 | 0.503371412 | 0.680169837 | no |
| LOC400558    | -0.037250865 | -0.669944996 | 0.503371511 | 0.680169837 | no |
| PHKG2        | 0.037246847  | 0.669872642  | 0.503417578 | 0.680169837 | no |
| AADACL2      | -0.037245285 | -0.669844501 | 0.503435495 | 0.680169837 | no |
| ANKRD61      | -0.037242739 | -0.669798662 | 0.503464681 | 0.680169837 | no |
| WWC1         | -0.037242    | -0.66978534  | 0.503473164 | 0.680169837 | no |
| SNX14        | -0.037217533 | -0.669344705 | 0.50375377  | 0.680434008 | no |
| PIGS         | 0.03721495   | 0.66929819   | 0.503783397 | 0.680434008 | no |
| SPRR4        | -0.037214216 | -0.66928497  | 0.503791817 | 0.680434008 | no |

|              |              |              |             |             |    |
|--------------|--------------|--------------|-------------|-------------|----|
| FAM161A      | 0.037213908  | 0.669279419  | 0.503795353 | 0.680434008 | no |
| IMMT         | 0.037206016  | 0.669137289  | 0.503885886 | 0.680434733 | no |
| COX6B2       | -0.037205588 | -0.669129582 | 0.503890796 | 0.680434733 | no |
| NUDT15       | 0.037205581  | 0.66912946   | 0.503890874 | 0.680434733 | no |
| U2AF1L4      | -0.037198267 | -0.66899773  | 0.503974791 | 0.680505292 | no |
| BHMT         | -0.037192605 | -0.668895759 | 0.504039755 | 0.680523753 | no |
| GLIPR1L1     | -0.037190329 | -0.66885478  | 0.504065864 | 0.680523753 | no |
| TAS2R3       | -0.037184822 | -0.668755593 | 0.50412906  | 0.680523753 | no |
| BOK-AS1      | -0.037184226 | -0.668744866 | 0.504135895 | 0.680523753 | no |
| SNORA64      | -0.037183277 | -0.668727768 | 0.50414679  | 0.680523753 | no |
| VTA1         | -0.037174914 | -0.66857715  | 0.504242766 | 0.680610556 | no |
| SLC7A2       | -0.037167332 | -0.668440599 | 0.504329786 | 0.68064444  | no |
| ZNF235       | -0.037167207 | -0.668438364 | 0.504331211 | 0.68064444  | no |
| WDR93        | 0.037162767  | 0.668358401  | 0.504382173 | 0.680670473 | no |
| ABHD16A      | -0.037151357 | -0.668152905 | 0.504513153 | 0.680777925 | no |
| CELA2A       | -0.037150312 | -0.668134082 | 0.504525151 | 0.680777925 | no |
| AQP12B       | -0.037140644 | -0.667959977 | 0.504636138 | 0.680884935 | no |
| CNEP1R1      | 0.037135789  | 0.667872537  | 0.504691884 | 0.680917401 | no |
| FTH1P3       | 0.037123963  | 0.667659548  | 0.504827684 | 0.681023805 | no |
| DEFA11P      | -0.037123401 | -0.667649441 | 0.504834128 | 0.681023805 | no |
| POLK         | 0.037110659  | 0.667419965  | 0.504980463 | 0.681156434 | no |
| TMEM31       | -0.037108322 | -0.667377877 | 0.505007304 | 0.681156434 | no |
| CCNF         | -0.037106368 | -0.667342681 | 0.505029751 | 0.681156434 | no |
| ETV2         | -0.037103802 | -0.66729647  | 0.505059224 | 0.681156434 | no |
| P2RX6P       | -0.037093843 | -0.667117108 | 0.505173626 | 0.681207555 | no |
| CHMP3        | -0.037093032 | -0.667102506 | 0.50518294  | 0.681207555 | no |
| ZNF205-AS1   | -0.037092224 | -0.667087957 | 0.505192221 | 0.681207555 | no |
| UVRAG        | 0.037082428  | 0.666911533  | 0.505304765 | 0.681288465 | no |
| CETN1        | -0.037079932 | -0.66686658  | 0.505333444 | 0.681288465 | no |
| MIR365B      | 0.037078615  | 0.66684287   | 0.50534857  | 0.681288465 | no |
| TMEM38A      | -0.037075964 | -0.666795128 | 0.505379029 | 0.681288465 | no |
| CELF2-AS2    | -0.037058791 | -0.666485852 | 0.505576369 | 0.681495293 | no |
| TRIM51HP     | 0.037057094  | 0.666455285  | 0.505595875 | 0.681495293 | no |
| ZSCAN5B      | -0.037051362 | -0.666352056 | 0.505661753 | 0.681541345 | no |
| CCDC77       | 0.037044059  | 0.666220531  | 0.505745695 | 0.681592615 | no |
| RNF5P1       | -0.037042534 | -0.666193069 | 0.505763224 | 0.681592615 | no |
| CDRT1        | 0.037030894  | 0.665983441  | 0.50589703  | 0.68173019  | no |
| LOC100128054 | 0.037022719  | 0.665836219  | 0.505991014 | 0.681814088 | no |
| CSTF3        | -0.037005689 | -0.665529517 | 0.506186837 | 0.682002393 | no |
| OSR2         | 0.037005046  | 0.665517941  | 0.506194229 | 0.682002393 | no |
| PREX2        | -0.037001748 | -0.665458553 | 0.506232152 | 0.682010731 | no |
| TNP2         | -0.036993344 | -0.665307197 | 0.506328809 | 0.682094932 | no |
| PSKH2        | 0.036990795  | 0.665261288  | 0.506358128 | 0.682094932 | no |
| GLTSCR1      | -0.036982486 | -0.665111655 | 0.506453698 | 0.68218091  | no |
| HIST1H4L     | -0.036961831 | -0.664739686 | 0.506691312 | 0.682385424 | no |
| PHYH         | 0.036961668  | 0.664736743  | 0.506693193 | 0.682385424 | no |
| KBTBD13      | -0.036961008 | -0.664724857 | 0.506700786 | 0.682385424 | no |
| NPAP1        | -0.036951337 | -0.664550695 | 0.506812063 | 0.682492515 | no |
| HOXD11       | 0.036928948  | 0.664147486  | 0.507069732 | 0.682796717 | no |
| MUC5B        | -0.036923982 | -0.664058054 | 0.507126893 | 0.682830903 | no |
| RPL22L1      | 0.036915502  | 0.663905343  | 0.507224506 | 0.68291955  | no |

|              |              |              |             |             |    |
|--------------|--------------|--------------|-------------|-------------|----|
| TUSC3        | -0.036911095 | -0.66382598  | 0.507275239 | 0.682945071 | no |
| GHDC         | -0.036886132 | -0.663376411 | 0.507562677 | 0.68325618  | no |
| TSNAX-DISC1  | -0.036885504 | -0.663365103 | 0.507569909 | 0.68325618  | no |
| IRX6         | -0.036876267 | -0.66319876  | 0.507676285 | 0.683313492 | no |
| TM4SF19-TCTE | -0.036874668 | -0.663169958 | 0.507694706 | 0.683313492 | no |
| TFRC         | -0.036873525 | -0.663149374 | 0.50770787  | 0.683313492 | no |
| MPC1L        | -0.036861996 | -0.662941756 | 0.507840663 | 0.683449414 | no |
| TYSND1       | -0.036857983 | -0.662869483 | 0.507886893 | 0.68346883  | no |
| LINC00626    | 0.036853812  | 0.662794374  | 0.507934939 | 0.683490688 | no |
| TENM4        | 0.036847716  | 0.662684576  | 0.50800518  | 0.683542408 | no |
| ACTR3BP2     | 0.036839203  | 0.662531274  | 0.508103261 | 0.683631577 | no |
| RD3L         | -0.036811689 | -0.662035788 | 0.508420335 | 0.683978904 | no |
| C1QL1        | -0.036810834 | -0.662020386 | 0.508430193 | 0.683978904 | no |
| TSPYL6       | -0.036808518 | -0.661978678 | 0.508456888 | 0.683978904 | no |
| CRYAB        | -0.036803347 | -0.661885553 | 0.508516495 | 0.683981289 | no |
| DMRTC2       | -0.036800188 | -0.66182866  | 0.508552912 | 0.683981289 | no |
| TTC16        | 0.036799924  | 0.661823911  | 0.508555952 | 0.683981289 | no |
| LOC401177    | 0.036794893  | 0.661733307  | 0.508613951 | 0.683981289 | no |
| GPATCH3      | -0.03679456  | -0.661727306 | 0.508617793 | 0.683981289 | no |
| GTF2A2       | -0.036779984 | -0.661464804 | 0.508785851 | 0.68413644  | no |
| FLJ43681     | -0.036778292 | -0.661434333 | 0.508805361 | 0.68413644  | no |
| LYG2         | 0.03677627   | 0.661397935  | 0.508828666 | 0.68413644  | no |
| C8orf87      | -0.036773002 | -0.661339068 | 0.508866359 | 0.684144318 | no |
| FTHL17       | -0.036769835 | -0.661282039 | 0.508902877 | 0.684150615 | no |
| RGP1         | 0.036744946  | 0.660833823  | 0.509189935 | 0.684493707 | no |
| SLC26A10     | -0.036727907 | -0.660526965 | 0.50938651  | 0.684715129 | no |
| BCL2L2-PABPN | 0.036705066  | 0.66011564   | 0.509650069 | 0.685026558 | no |
| IQCF1        | -0.036700796 | -0.660038746 | 0.509699348 | 0.685049949 | no |
| C1orf116     | 0.036693934  | 0.659915171  | 0.509778547 | 0.685113549 | no |
| POLR2C       | -0.036690634 | -0.659855748 | 0.509816634 | 0.685121891 | no |
| OTOR         | -0.036676715 | -0.659605073 | 0.509977318 | 0.685294976 | no |
| TMPRSS11F    | 0.036673449  | 0.659546271  | 0.510015014 | 0.68530278  | no |
| SAMD5        | -0.036667306 | -0.65943563  | 0.510085947 | 0.685355242 | no |
| CDC42SE1     | 0.036658125  | 0.659270309  | 0.510191946 | 0.685444685 | no |
| HKDC1        | 0.036656016  | 0.659232319  | 0.510216306 | 0.685444685 | no |
| ANKRD1       | 0.036638103  | 0.658909741  | 0.51042317  | 0.685679732 | no |
| EPPIN        | -0.03660218  | -0.658262826 | 0.510838161 | 0.686129834 | no |
| OR1F2P       | -0.036601319 | -0.658247308 | 0.510848118 | 0.686129834 | no |
| ZC3H11A      | -0.036600809 | -0.65823813  | 0.510854007 | 0.686129834 | no |
| PTPLA        | 0.036597764  | 0.658183292  | 0.510889194 | 0.686134212 | no |
| LOXHD1       | -0.036592782 | -0.658093577 | 0.510946762 | 0.686150188 | no |
| LRRC43       | 0.036591209  | 0.658065243  | 0.510964944 | 0.686150188 | no |
| C18orf8      | 0.036586409  | 0.657978805  | 0.511020414 | 0.686181801 | no |
| DEK          | -0.03657593  | -0.657790094 | 0.511141527 | 0.686293149 | no |
| SP5          | -0.036573708 | -0.657750084 | 0.511167207 | 0.686293149 | no |
| SH3RF2       | 0.036566507  | 0.657620405  | 0.511250444 | 0.686362025 | no |
| OR4M2        | -0.036559065 | -0.657486382 | 0.511336478 | 0.686395997 | no |
| LOC283731    | -0.036558792 | -0.657481477 | 0.511339626 | 0.686395997 | no |
| SNORA22      | -0.03654389  | -0.657213109 | 0.511511923 | 0.686554007 | no |
| TFB1M        | 0.036543085  | 0.657198613  | 0.51152123  | 0.686554007 | no |
| KRTAP1-5     | 0.036540019  | 0.65714341   | 0.511556676 | 0.686558703 | no |

|              |              |              |             |             |    |
|--------------|--------------|--------------|-------------|-------------|----|
| CDKN2A       | 0.036534089  | 0.657036622  | 0.511625247 | 0.686607854 | no |
| AGTR1        | 0.036527347  | 0.656915209  | 0.511703215 | 0.686632204 | no |
| GAS5-AS1     | -0.036523462 | -0.656845237 | 0.511748152 | 0.686632204 | no |
| GDF2         | -0.036522435 | -0.656826755 | 0.511760022 | 0.686632204 | no |
| LRRC3C       | -0.03652147  | -0.656809365 | 0.51177119  | 0.686632204 | no |
| ATP6V1E1     | -0.03651691  | -0.656727245 | 0.511823933 | 0.6866601   | no |
| SUN1         | -0.03651342  | -0.656664408 | 0.511864292 | 0.686662601 | no |
| MTRF1        | -0.036511224 | -0.656624852 | 0.5118897   | 0.686662601 | no |
| GRXCR2       | -0.036502061 | -0.656459847 | 0.511995692 | 0.686761915 | no |
| ZNF396       | 0.03649494   | 0.656331617  | 0.512078069 | 0.686808138 | no |
| TBX22        | -0.036493534 | -0.656306301 | 0.512094333 | 0.686808138 | no |
| TRIM64C      | -0.036490795 | -0.656256971 | 0.512126026 | 0.686808138 | no |
| CTH          | -0.03647999  | -0.656062392 | 0.512251047 | 0.686932937 | no |
| TH           | -0.036459632 | -0.655695789 | 0.512486639 | 0.687205987 | no |
| ENTPD5       | 0.036439031  | 0.655324798  | 0.512725109 | 0.687472676 | no |
| C17orf102    | -0.036436924 | -0.655286856 | 0.512749501 | 0.687472676 | no |
| REN          | -0.036423465 | -0.655044479 | 0.512905334 | 0.687638711 | no |
| PPARGC1B     | 0.036412415  | 0.654845502  | 0.513033283 | 0.687767343 | no |
| TEKT1        | 0.036392522  | 0.654487267  | 0.51326368  | 0.688033293 | no |
| LRRC14B      | -0.036350604 | -0.653732408 | 0.513749344 | 0.688588718 | no |
| TRIM49D2P    | -0.036345476 | -0.653640066 | 0.513808771 | 0.688588718 | no |
| TNFSF18      | 0.036345209  | 0.653635251  | 0.51381187  | 0.688588718 | no |
| CXADRP2      | -0.036343538 | -0.653605158 | 0.513831238 | 0.688588718 | no |
| ABCF2        | 0.036342935  | 0.653594304  | 0.513838224 | 0.688588718 | no |
| DEFB116      | -0.036336515 | -0.653478691 | 0.513912635 | 0.688641662 | no |
| LOC728819    | 0.036333997  | 0.653433351  | 0.513941818 | 0.688641662 | no |
| FGFR3        | -0.036329869 | -0.653359008 | 0.513989672 | 0.688662845 | no |
| SPINK14      | 0.036323923  | 0.65325193   | 0.5140586   | 0.68871226  | no |
| RNF175       | -0.036292713 | -0.652689913 | 0.514420462 | 0.689130277 | no |
| CCDC135      | 0.036290602  | 0.652651907  | 0.514444937 | 0.689130277 | no |
| TCF7         | 0.03628794   | 0.652603966  | 0.514475811 | 0.689130277 | no |
| AMELX        | -0.036283464 | -0.652523363 | 0.514527723 | 0.689130277 | no |
| RGPD5        | -0.036283035 | -0.65251564  | 0.514532697 | 0.689130277 | no |
| RYR3         | 0.0362796    | 0.652453774  | 0.514572543 | 0.689130277 | no |
| MMP23A       | -0.036275799 | -0.652385339 | 0.514616621 | 0.689130277 | no |
| TMEM56       | -0.036274893 | -0.652369012 | 0.514627138 | 0.689130277 | no |
| NDUFC1       | 0.036266743  | 0.652222246  | 0.514721676 | 0.689213928 | no |
| MIR3689B     | -0.036253283 | -0.651979876 | 0.514877819 | 0.689356061 | no |
| SLC26A3      | 0.036252063  | 0.651957899  | 0.514891978 | 0.689356061 | no |
| LOC100287704 | -0.036242682 | -0.651788974 | 0.51500082  | 0.689436887 | no |
| ZFAND3       | -0.03624133  | -0.651764628 | 0.515016508 | 0.689436887 | no |
| TRIQQ        | 0.036202202  | 0.651060013  | 0.515470646 | 0.689978892 | no |
| KRTAP16-1    | -0.036200913 | -0.651036812 | 0.515485603 | 0.689978892 | no |
| DNMT1        | -0.036183086 | -0.650715796 | 0.515692575 | 0.690212938 | no |
| RNF216       | 0.036179256  | 0.650646812  | 0.515737058 | 0.690229488 | no |
| LOC100240734 | -0.036173071 | -0.650535443 | 0.515808876 | 0.690252699 | no |
| TGM6         | -0.03617223  | -0.650520306 | 0.515818638 | 0.690252699 | no |
| ABHD2        | -0.036158491 | -0.650272902 | 0.5159782   | 0.690409994 | no |
| LOC253044    | -0.036156577 | -0.650238431 | 0.516000434 | 0.690409994 | no |
| TSEN2        | 0.036151138  | 0.650140477  | 0.516063618 | 0.690426135 | no |
| ZNF48        | -0.036150007 | -0.650120119 | 0.51607675  | 0.690426135 | no |

|            |              |              |             |             |    |
|------------|--------------|--------------|-------------|-------------|----|
| SNORA19    | -0.036136075 | -0.649869231 | 0.516238601 | 0.690599674 | no |
| POU4F2     | -0.036120207 | -0.649583493 | 0.516422967 | 0.690803311 | no |
| LRBA       | 0.036108804  | 0.649378162  | 0.516555473 | 0.690937554 | no |
| LINC00265  | 0.036104917  | 0.649308171  | 0.516600645 | 0.69095497  | no |
| ZRANB2-AS2 | 0.036095853  | 0.649144942  | 0.516705999 | 0.691052873 | no |
| PSME1      | 0.036088225  | 0.649007592  | 0.516794658 | 0.691128438 | no |
| PPP3R2     | -0.036063731 | -0.648566505 | 0.517079433 | 0.69146625  | no |
| PAIP1      | 0.036059523  | 0.648490738  | 0.517128358 | 0.691488648 | no |
| SCGN       | -0.036033151 | -0.648015846 | 0.517435065 | 0.69185572  | no |
| PWP1       | -0.036017863 | -0.64774055  | 0.517612908 | 0.692050454 | no |
| ZNF182     | -0.036010405 | -0.647606255 | 0.517699674 | 0.692116108 | no |
| OR4D10     | -0.036008106 | -0.647564856 | 0.517726423 | 0.692116108 | no |
| OR4K1      | -0.035989451 | -0.647228929 | 0.517943501 | 0.692363238 | no |
| ZNF615     | -0.035978959 | -0.647040007 | 0.518065603 | 0.692448168 | no |
| PIGX       | -0.035978108 | -0.647024682 | 0.518075509 | 0.692448168 | no |
| IL15       | 0.035973878  | 0.646948506  | 0.518124747 | 0.692448168 | no |
| TPRG1L     | -0.03597099  | -0.646896506 | 0.51815836  | 0.692448168 | no |
| UCK1       | -0.035967891 | -0.646840698 | 0.518194436 | 0.692448168 | no |
| UBE2D4     | -0.035967382 | -0.646831537 | 0.518200358 | 0.692448168 | no |
| VDAC1      | 0.035963683  | 0.646764931  | 0.518243416 | 0.692462649 | no |
| SPATA31C1  | -0.035956993 | -0.646644456 | 0.518321302 | 0.692523662 | no |
| KIR3DL3    | -0.035945114 | -0.646430557 | 0.518459601 | 0.692665379 | no |
| ATP1B4     | 0.035938126  | 0.64630471   | 0.518540979 | 0.692718204 | no |
| BTN1A1     | -0.035934993 | -0.646248308 | 0.518577453 | 0.692718204 | no |
| OSCP1      | 0.035930711  | 0.646171196  | 0.518627321 | 0.692718204 | no |
| TMEM194A   | 0.035930647  | 0.646170034  | 0.518628073 | 0.692718204 | no |
| ROCK1      | 0.035914473  | 0.645878803  | 0.518816434 | 0.692926729 | no |
| FBXL19-AS1 | 0.035899065  | 0.645601341  | 0.518995924 | 0.693123378 | no |
| ZNF548     | -0.035895729 | -0.645541274 | 0.519034786 | 0.693132206 | no |
| LINC00210  | 0.035884308  | 0.645335619  | 0.51916785  | 0.693212305 | no |
| OR4A5      | 0.035883344  | 0.645318256  | 0.519179085 | 0.693212305 | no |
| HMGCS2     | -0.035879541 | -0.64524977  | 0.519223401 | 0.693212305 | no |
| LY6G5C     | -0.035879507 | -0.645249169 | 0.51922379  | 0.693212305 | no |
| SOX14      | -0.035872875 | -0.645129749 | 0.51930107  | 0.693272413 | no |
| YWHAB      | 0.03586032   | 0.644903665  | 0.519447392 | 0.693387004 | no |
| ITGA2      | -0.035859973 | -0.64489742  | 0.519451434 | 0.693387004 | no |
| KIR3DX1    | -0.035837848 | -0.64449901  | 0.519709338 | 0.69368818  | no |
| BLM        | 0.035822081  | 0.64421509   | 0.51989317  | 0.693846871 | no |
| ATG4B      | 0.035821031  | 0.644196195  | 0.519905405 | 0.693846871 | no |
| PRKACG     | -0.035819343 | -0.644165804 | 0.519925085 | 0.693846871 | no |
| TRIM64B    | -0.035798599 | -0.643792272 | 0.520166998 | 0.694126572 | no |
| CSRP3      | -0.035793319 | -0.643697179 | 0.520228593 | 0.694126572 | no |
| STAT4      | -0.035793063 | -0.643692581 | 0.520231571 | 0.694126572 | no |
| FLJ46284   | -0.035789366 | -0.643626012 | 0.520274692 | 0.694141011 | no |
| YAE1D1     | -0.035769332 | -0.643265253 | 0.520508412 | 0.694409727 | no |
| LINC00174  | 0.035765919  | 0.643203808  | 0.520548226 | 0.694419734 | no |
| ST7        | 0.035758409  | 0.643068573  | 0.520635856 | 0.694459332 | no |
| MYOG       | -0.035757837 | -0.643058263 | 0.520642537 | 0.694459332 | no |
| SIRT5      | -0.035748021 | -0.64288151  | 0.520757083 | 0.694569011 | no |
| CMIP       | -0.03573567  | -0.642659121 | 0.520901222 | 0.694718143 | no |
| KIF26B     | 0.035732661  | 0.642604929  | 0.520936349 | 0.694721879 | no |

|              |              |              |             |             |    |
|--------------|--------------|--------------|-------------|-------------|----|
| LPPR4        | -0.035712627 | -0.642244182 | 0.521170215 | 0.694990636 | no |
| NBPF11       | 0.035696123  | 0.64194701   | 0.521362908 | 0.695204458 | no |
| CLK2         | -0.035655405 | -0.641213811 | 0.521838487 | 0.695795442 | no |
| OR5AK2       | 0.035645223  | 0.641030482  | 0.521957436 | 0.695869199 | no |
| FRMD7        | -0.035644938 | -0.64102534  | 0.521960772 | 0.695869199 | no |
| FLJ25758     | -0.035642302 | -0.640977868 | 0.521991576 | 0.695869199 | no |
| EXOG         | -0.035639585 | -0.640928945 | 0.522023322 | 0.695869199 | no |
| LOC285084    | -0.035634715 | -0.640841256 | 0.522080225 | 0.695901887 | no |
| PCDHGA8      | -0.035631056 | -0.640775382 | 0.522122975 | 0.695915707 | no |
| ANXA2P3      | -0.035627556 | -0.640712354 | 0.522163879 | 0.695927066 | no |
| KRTAP17-1    | -0.035623744 | -0.640643707 | 0.522208432 | 0.695942972 | no |
| WDR76        | -0.035620287 | -0.640581473 | 0.522248825 | 0.695942972 | no |
| OBP2B        | -0.035618222 | -0.640544282 | 0.522272963 | 0.695942972 | no |
| HIST1H2AA    | -0.03559058  | -0.640046553 | 0.522596075 | 0.696297438 | no |
| KRT13        | 0.035589922  | 0.640034697  | 0.522603773 | 0.696297438 | no |
| IGFBP5       | 0.035582689  | 0.639904465  | 0.522688333 | 0.696349177 | no |
| C2CD3        | 0.035581058  | 0.639875088  | 0.522707409 | 0.696349177 | no |
| CRNKL1       | -0.035574692 | -0.639760464 | 0.522781842 | 0.696405168 | no |
| SUPT3H       | -0.035571451 | -0.639702104 | 0.522819742 | 0.696412487 | no |
| PYY2         | 0.035559721  | 0.639490883  | 0.522956922 | 0.696552043 | no |
| METAP2       | -0.035548976 | -0.639297413 | 0.52308259  | 0.696676248 | no |
| LOC255025    | -0.035542428 | -0.63917951  | 0.523159181 | 0.696735078 | no |
| GPR139       | -0.035532987 | -0.639009506 | 0.523269627 | 0.696838986 | no |
| CPN2         | 0.035520142  | 0.63877821   | 0.523419913 | 0.696995932 | no |
| KCNJ13       | -0.035487985 | -0.638199187 | 0.523796233 | 0.697438188 | no |
| LCE1E        | -0.035486216 | -0.638167338 | 0.523816937 | 0.697438188 | no |
| EN2          | 0.035476503  | 0.637992448  | 0.523930631 | 0.697546351 | no |
| LOC283050    | -0.035472123 | -0.637913571 | 0.523981913 | 0.697571411 | no |
| MIR3907      | -0.035459786 | -0.637691426 | 0.524126354 | 0.697720482 | no |
| MRGPRD       | -0.035436735 | -0.637276372 | 0.52439628  | 0.698036571 | no |
| OR2K2        | -0.035428672 | -0.637131195 | 0.524490711 | 0.698100633 | no |
| FAM103A1     | 0.0354262    | 0.637086688  | 0.524519663 | 0.698100633 | no |
| TRIP12       | -0.035424306 | -0.637052572 | 0.524541856 | 0.698100633 | no |
| MBNL1        | -0.035413418 | -0.63685653  | 0.524669393 | 0.698184076 | no |
| CSN1S1       | -0.035411529 | -0.636822505 | 0.52469153  | 0.698184076 | no |
| GPR176       | -0.035410633 | -0.636806389 | 0.524702015 | 0.698184076 | no |
| TMC05A       | 0.035401255  | 0.636637521  | 0.52481189  | 0.698287044 | no |
| FAM160A1     | 0.035396938  | 0.636559787  | 0.524862472 | 0.698311112 | no |
| PLEKHG5      | 0.035392206  | 0.636474577  | 0.524917922 | 0.698341653 | no |
| NFATC4       | 0.035380619  | 0.636265946  | 0.5250537   | 0.69847905  | no |
| LCE2A        | -0.035372449 | -0.636118843 | 0.525149446 | 0.69856318  | no |
| ATP5B        | -0.035369136 | -0.636059181 | 0.525188281 | 0.698569207 | no |
| ECT2L        | -0.035362981 | -0.635948353 | 0.525260425 | 0.698569207 | no |
| NOBOX        | -0.035362768 | -0.635944516 | 0.525262923 | 0.698569207 | no |
| NR2F6        | 0.03536097   | 0.635912142  | 0.525283998 | 0.698569207 | no |
| DEFB133      | -0.035345775 | -0.635638554 | 0.525462117 | 0.698762846 | no |
| CLUAP1       | -0.035342799 | -0.635584957 | 0.525497015 | 0.698766016 | no |
| METTL1       | -0.035336492 | -0.635471397 | 0.52557096  | 0.698821104 | no |
| SNORA50      | 0.035330247  | 0.635358958  | 0.52564418  | 0.698875221 | no |
| EIF2B1       | 0.035324236  | 0.635250711  | 0.525714675 | 0.698889452 | no |
| LOC100505795 | -0.035323788 | -0.635242653 | 0.525719923 | 0.698889452 | no |

|              |              |              |             |             |    |
|--------------|--------------|--------------|-------------|-------------|----|
| GNPNAT1      | 0.035313064  | 0.635049565  | 0.525845684 | 0.698992015 | no |
| FABP9        | -0.035311663 | -0.635024326 | 0.525862123 | 0.698992015 | no |
| IRGC         | -0.035301658 | -0.634844186 | 0.525979466 | 0.69910475  | no |
| PWP2         | 0.035294671  | 0.63471838   | 0.526061424 | 0.699111844 | no |
| HERPUD2      | 0.035293968  | 0.634705714  | 0.526069675 | 0.699111844 | no |
| DDX11-AS1    | -0.035292884 | -0.634686192 | 0.526082394 | 0.699111844 | no |
| LOC100507501 | 0.035285131  | 0.634546596  | 0.526173345 | 0.699150503 | no |
| TTLL7        | -0.035282209 | -0.634493983 | 0.526207626 | 0.699150503 | no |
| TRIM60       | -0.035282085 | -0.634491748 | 0.526209082 | 0.699150503 | no |
| ZG16         | -0.035276087 | -0.634383749 | 0.526279455 | 0.699200777 | no |
| ATOH1        | -0.035272526 | -0.634319641 | 0.52632123  | 0.699213053 | no |
| C22orf23     | -0.035249026 | -0.633896496 | 0.526597011 | 0.699536182 | no |
| ANAPC16      | -0.035243171 | -0.63379107  | 0.526665733 | 0.69958423  | no |
| C4orf6       | -0.035236593 | -0.633672642 | 0.526742935 | 0.699643537 | no |
| CNGA1        | 0.035193752  | 0.632901254  | 0.527245942 | 0.70020656  | no |
| FAM224A      | 0.035193243  | 0.632892083  | 0.527251924 | 0.70020656  | no |
| ZNF689       | -0.035192166 | -0.632872703 | 0.527264564 | 0.70020656  | no |
| LOC100507299 | 0.035188884  | 0.632813593  | 0.52730312  | 0.700214493 | no |
| TBC1D22B     | 0.035165164  | 0.632386503  | 0.527581738 | 0.700499675 | no |
| C8A          | 0.03516505   | 0.632384463  | 0.527583069 | 0.700499675 | no |
| CCDC117      | 0.035147883  | 0.632075349  | 0.527784771 | 0.700704659 | no |
| CMTM2        | -0.03514636  | -0.632047934 | 0.527802662 | 0.700704659 | no |
| CLDN12       | -0.035116865 | -0.631516866 | 0.528149292 | 0.701121529 | no |
| BRI3BP       | -0.035106636 | -0.631332685 | 0.528269534 | 0.701227845 | no |
| METTL13      | -0.035104501 | -0.631294237 | 0.528294637 | 0.701227845 | no |
| AGPAT1       | -0.035079244 | -0.630839481 | 0.528591592 | 0.701544638 | no |
| C10orf120    | -0.035078649 | -0.630828764 | 0.528598591 | 0.701544638 | no |
| CYP3A5       | -0.035071616 | -0.630702136 | 0.528681294 | 0.701546731 | no |
| TECRL        | -0.0350713   | -0.630696443 | 0.528685013 | 0.701546731 | no |
| MS4A13       | -0.035066505 | -0.63061011  | 0.528741403 | 0.701546731 | no |
| NOTCH2NL     | -0.035060981 | -0.630510634 | 0.528806381 | 0.701546731 | no |
| FAM66A       | -0.03505851  | -0.630466156 | 0.528835436 | 0.701546731 | no |
| ASXL2        | 0.035057381  | 0.630445823  | 0.528848718 | 0.701546731 | no |
| TPTE         | 0.03505601   | 0.630421131  | 0.528864848 | 0.701546731 | no |
| APOPT1       | -0.035053715 | -0.630379812 | 0.528891841 | 0.701546731 | no |
| SOCS2        | 0.035052     | 0.630348931  | 0.528912015 | 0.701546731 | no |
| CDC7         | -0.03504994  | -0.630311839 | 0.528936247 | 0.701546731 | no |
| OR2A25       | -0.035047984 | -0.630276631 | 0.52895925  | 0.701546731 | no |
| SMUG1        | 0.035038349  | 0.630103137  | 0.529072604 | 0.701653769 | no |
| LOC100130992 | -0.035025355 | -0.629869188 | 0.529225476 | 0.701813199 | no |
| HS3ST2       | -0.03501565  | -0.629694451 | 0.529339672 | 0.701921323 | no |
| INPP5J       | -0.035010823 | -0.629607527 | 0.529396483 | 0.701953346 | no |
| SERPINB5     | -0.035004025 | -0.629485137 | 0.529476481 | 0.702016105 | no |
| MYL1         | -0.034996678 | -0.629352853 | 0.529562952 | 0.70208744  | no |
| IFRD1        | 0.034982547  | 0.629098406  | 0.529729298 | 0.702161613 | no |
| SAMD7        | -0.034980806 | -0.629067061 | 0.529749792 | 0.702161613 | no |
| OR52N1       | 0.034976395  | 0.628987641  | 0.52980172  | 0.702161613 | no |
| CACNA1D      | -0.034976199 | -0.62898412  | 0.529804022 | 0.702161613 | no |
| ZBED6        | -0.034975941 | -0.628979463 | 0.529807067 | 0.702161613 | no |
| RASA3        | -0.034972677 | -0.62892071  | 0.529845484 | 0.702161613 | no |
| MAML1        | -0.034959162 | -0.628677368 | 0.530004613 | 0.702161613 | no |

|              |              |              |             |             |    |
|--------------|--------------|--------------|-------------|-------------|----|
| LHX8         | -0.034951469 | -0.628538841 | 0.530095212 | 0.702161613 | no |
| HDLBP        | 0.034929273  | 0.628139202  | 0.530356625 | 0.702161613 | no |
| CSTL1        | -0.034929157 | -0.628137113 | 0.530357991 | 0.702161613 | no |
| CLEC3B       | -0.034916548 | -0.627910095 | 0.530506518 | 0.702161613 | no |
| TMEM241      | 0.034906694  | 0.627732675  | 0.530622611 | 0.702161613 | no |
| SMPD4        | -0.034902173 | -0.627651266 | 0.530675884 | 0.702161613 | no |
| LINC00235    | 0.034897321  | 0.627563898  | 0.53073306  | 0.702161613 | no |
| FLJ45974     | -0.034891276 | -0.627455057 | 0.530804292 | 0.702161613 | no |
| WFDC1        | -0.034889611 | -0.627425085 | 0.530823908 | 0.702161613 | no |
| CHRNB4       | 0.034868983  | 0.627053672  | 0.531067026 | 0.702161613 | no |
| TVP23C-CDRT4 | 0.034867055  | 0.627018958  | 0.531089752 | 0.702161613 | no |
| PZP          | 0.034845454  | 0.626630031  | 0.5313444   | 0.702161613 | no |
| KCTD7        | -0.034840585 | -0.626542371 | 0.531401804 | 0.702161613 | no |
| SPDYE4       | -0.034818677 | -0.626147928 | 0.531660141 | 0.702161613 | no |
| PHKA1        | 0.034818611  | 0.626146736  | 0.531660922 | 0.702161613 | no |
| NODAL        | -0.034818122 | -0.626137924 | 0.531666694 | 0.702161613 | no |
| MIR3944      | 0.034805527  | 0.625911151  | 0.531815247 | 0.702161613 | no |
| VPS25        | 0.034800289  | 0.625816849  | 0.531877029 | 0.702161613 | no |
| TRAPPC1      | -0.034791572 | -0.625659896 | 0.531979863 | 0.702161613 | no |
| SPATA31A7    | -0.034791572 | -0.625659896 | 0.531979863 | 0.702161613 | no |
| OR11H1       | -0.034791572 | -0.625659896 | 0.531979863 | 0.702161613 | no |
| LOC100505776 | -0.034791572 | -0.625659896 | 0.531979863 | 0.702161613 | no |
| RNU6-6       | -0.034791572 | -0.625659896 | 0.531979863 | 0.702161613 | no |
| GGTLC2       | -0.034791572 | -0.625659896 | 0.531979863 | 0.702161613 | no |
| GAGE12I      | -0.034791572 | -0.625659896 | 0.531979863 | 0.702161613 | no |
| TRIM40       | -0.034791572 | -0.625659896 | 0.531979863 | 0.702161613 | no |
| H2AFB3       | -0.034791572 | -0.625659896 | 0.531979863 | 0.702161613 | no |
| OR4F21       | -0.034791572 | -0.625659896 | 0.531979863 | 0.702161613 | no |
| RHOXF2B      | -0.034791572 | -0.625659896 | 0.531979863 | 0.702161613 | no |
| RHOXF2       | -0.034791572 | -0.625659896 | 0.531979863 | 0.702161613 | no |
| TTY7B        | -0.034791572 | -0.625659896 | 0.531979863 | 0.702161613 | no |
| TISP43       | -0.034791572 | -0.625659896 | 0.531979863 | 0.702161613 | no |
| CSN1S2BP     | -0.034791572 | -0.625659896 | 0.531979863 | 0.702161613 | no |
| LINC00112    | -0.034791572 | -0.625659896 | 0.531979863 | 0.702161613 | no |
| LOC100288570 | -0.034791572 | -0.625659896 | 0.531979863 | 0.702161613 | no |
| NRG1-IT3     | -0.034791572 | -0.625659896 | 0.531979863 | 0.702161613 | no |
| MIR1253      | -0.034791572 | -0.625659896 | 0.531979863 | 0.702161613 | no |
| PRAMEF21     | -0.034791572 | -0.625659896 | 0.531979863 | 0.702161613 | no |
| MIR7-3       | -0.034791572 | -0.625659896 | 0.531979863 | 0.702161613 | no |
| OR2T35       | -0.034791572 | -0.625659896 | 0.531979863 | 0.702161613 | no |
| LOC100288966 | -0.034791572 | -0.625659896 | 0.531979863 | 0.702161613 | no |
| IRX4         | -0.034791572 | -0.625659896 | 0.531979863 | 0.702161613 | no |
| SLC2A2       | -0.034791572 | -0.625659896 | 0.531979863 | 0.702161613 | no |
| SPANXA2      | -0.034791572 | -0.625659896 | 0.531979863 | 0.702161613 | no |
| TTY19        | -0.034791572 | -0.625659896 | 0.531979863 | 0.702161613 | no |
| NR1I3        | -0.034791572 | -0.625659896 | 0.531979863 | 0.702161613 | no |
| RNU6-16      | -0.034791572 | -0.625659896 | 0.531979863 | 0.702161613 | no |
| TSPY2        | -0.034791572 | -0.625659896 | 0.531979863 | 0.702161613 | no |
| MIR548J      | -0.034791572 | -0.625659896 | 0.531979863 | 0.702161613 | no |
| MIR3689A     | -0.034791572 | -0.625659896 | 0.531979863 | 0.702161613 | no |
| MIR3910-1    | -0.034791572 | -0.625659896 | 0.531979863 | 0.702161613 | no |



|              |              |              |             |             |    |
|--------------|--------------|--------------|-------------|-------------|----|
| LOC255411    | -0.034791572 | -0.625659896 | 0.531979863 | 0.702161613 | no |
| MIR5000      | -0.034791572 | -0.625659896 | 0.531979863 | 0.702161613 | no |
| MIR5100      | -0.034791572 | -0.625659896 | 0.531979863 | 0.702161613 | no |
| LOC100130954 | -0.034791572 | -0.625659896 | 0.531979863 | 0.702161613 | no |
| MIR7-2       | -0.034791572 | -0.625659896 | 0.531979863 | 0.702161613 | no |
| FAM223B      | -0.034791572 | -0.625659896 | 0.531979863 | 0.702161613 | no |
| PRAMEF7      | -0.034791572 | -0.625659896 | 0.531979863 | 0.702161613 | no |
| MIR4330      | -0.034791572 | -0.625659896 | 0.531979863 | 0.702161613 | no |
| MAGEA5       | -0.034791572 | -0.625659896 | 0.531979863 | 0.702161613 | no |
| MIR5186      | -0.034791572 | -0.625659896 | 0.531979863 | 0.702161613 | no |
| MUC7         | -0.034791572 | -0.625659896 | 0.531979863 | 0.702161613 | no |
| ZBP2         | -0.034791572 | -0.625659896 | 0.531979863 | 0.702161613 | no |
| MIR518C      | -0.034791572 | -0.625659896 | 0.531979863 | 0.702161613 | no |
| CST8         | -0.034791572 | -0.625659896 | 0.531979863 | 0.702161613 | no |
| LINC00493    | 0.034789528  | 0.625623089  | 0.53200398  | 0.702161613 | no |
| TYW1         | 0.034785502  | 0.625550611  | 0.532051472 | 0.702164877 | no |
| LINC00303    | -0.034783014 | -0.625505812 | 0.532080828 | 0.702164877 | no |
| PIGR         | 0.03478101   | 0.625469732  | 0.532104471 | 0.702164877 | no |
| MSLN         | 0.034769381  | 0.625260356  | 0.532241684 | 0.70230282  | no |
| SIGLECL1     | -0.034724445 | -0.62445129  | 0.532772071 | 0.702922939 | no |
| UBE2J1       | 0.034724023  | 0.624443685  | 0.532777058 | 0.702922939 | no |
| FLJ35282     | 0.034719689  | 0.62436566   | 0.532828222 | 0.702947288 | no |
| RSPH3        | 0.034691438  | 0.623857005  | 0.533161828 | 0.703314973 | no |
| MAP3K19      | 0.034690098  | 0.623832885  | 0.53317765  | 0.703314973 | no |
| DAOA-AS1     | -0.034687774 | -0.623791036 | 0.533205102 | 0.703314973 | no |
| ZNF280A      | 0.034674648  | 0.623554702  | 0.533360147 | 0.703476306 | no |
| PRAMEF1      | -0.034655179 | -0.62320417  | 0.533590152 | 0.703714835 | no |
| FGG          | -0.034652326 | -0.623152801 | 0.533623862 | 0.703714835 | no |
| LOC645949    | -0.034651025 | -0.623129386 | 0.533639229 | 0.703714835 | no |
| NLRP8        | -0.034634503 | -0.622831919 | 0.533834463 | 0.703886076 | no |
| NPPC         | -0.034634493 | -0.622831727 | 0.533834589 | 0.703886076 | no |
| ECEL1        | -0.034622922 | -0.622623399 | 0.533971341 | 0.703939777 | no |
| ZNF846       | -0.034621644 | -0.622600397 | 0.533986441 | 0.703939777 | no |
| RBL2         | -0.034620603 | -0.622581643 | 0.533998754 | 0.703939777 | no |
| COX6B1       | 0.03461691   | 0.62251515   | 0.534042406 | 0.703939777 | no |
| DMPK         | -0.034616471 | -0.622507261 | 0.534047585 | 0.703939777 | no |
| LINC00424    | -0.034614419 | -0.622470306 | 0.534071847 | 0.703939777 | no |
| CREB3        | 0.03461061   | 0.622401737  | 0.534116866 | 0.70395594  | no |
| CACNA1G-AS1  | -0.034605237 | -0.622304986 | 0.53418039  | 0.7039712   | no |
| OBP2A        | -0.034601544 | -0.622238506 | 0.534224042 | 0.7039712   | no |
| MAS1L        | -0.034601318 | -0.622234438 | 0.534226713 | 0.7039712   | no |
| SCGB1B2P     | -0.034588155 | -0.62199743  | 0.534382352 | 0.704091477 | no |
| KATNAL1      | 0.034585165  | 0.621943604  | 0.534417701 | 0.704091477 | no |
| VWDE         | 0.03458388   | 0.621920473  | 0.534432892 | 0.704091477 | no |
| SEC14L4      | -0.034582515 | -0.62189589  | 0.534449038 | 0.704091477 | no |
| RASGEF1A     | -0.034574582 | -0.621753068 | 0.534542842 | 0.704171891 | no |
| TIMELESS     | -0.034565896 | -0.621596677 | 0.534645569 | 0.704249152 | no |
| CXorf58      | 0.034564081  | 0.621564005  | 0.534667031 | 0.704249152 | no |
| PPIA         | 0.034556985  | 0.621436232  | 0.534750969 | 0.704316545 | no |
| SPNS1        | 0.03454685   | 0.621253761  | 0.534870851 | 0.70443127  | no |
| GCG          | -0.034539189 | -0.621115828 | 0.534961481 | 0.704507457 | no |

|              |              |              |             |             |    |
|--------------|--------------|--------------|-------------|-------------|----|
| FEN1         | -0.034523378 | -0.620831161 | 0.535148549 | 0.704710629 | no |
| LOC441242    | -0.034511406 | -0.62061561  | 0.535290219 | 0.704817176 | no |
| KRTAP4-5     | -0.034510997 | -0.620608258 | 0.535295051 | 0.704817176 | no |
| CCZ1B        | 0.034503375  | 0.620471031  | 0.535385254 | 0.704887622 | no |
| KRTAP10-8    | -0.034500934 | -0.62042707  | 0.535414152 | 0.704887622 | no |
| VCX2         | -0.034497699 | -0.620368837 | 0.535452433 | 0.704894839 | no |
| ALDH8A1      | 0.034493012  | 0.620284439  | 0.535507917 | 0.704924699 | no |
| LACRT        | -0.034474897 | -0.619958297 | 0.535722353 | 0.705139451 | no |
| KIAA0101     | -0.034473687 | -0.619936512 | 0.535736678 | 0.705139451 | no |
| ATRX         | -0.034462689 | -0.619738497 | 0.535866895 | 0.705267648 | no |
| TERT         | -0.034443197 | -0.619387562 | 0.536097712 | 0.705473432 | no |
| WDR87        | -0.034441247 | -0.61935245  | 0.536120808 | 0.705473432 | no |
| C2orf57      | -0.034440161 | -0.619332902 | 0.536133668 | 0.705473432 | no |
| NKX6-2       | -0.034438397 | -0.619301147 | 0.536154556 | 0.705473432 | no |
| COA6         | 0.034435367  | 0.619246579  | 0.536190453 | 0.705477472 | no |
| BCL9L        | -0.034426666 | -0.61908993  | 0.53629351  | 0.70556987  | no |
| FAM102A      | 0.034411278  | 0.618812876  | 0.536475804 | 0.705719289 | no |
| LOC283688    | -0.034409476 | -0.618780433 | 0.536497152 | 0.705719289 | no |
| ECI2         | -0.034408763 | -0.618767602 | 0.536505595 | 0.705719289 | no |
| SNORA5B      | -0.034401334 | -0.618633843 | 0.536593618 | 0.705791109 | no |
| GOLIM4       | 0.034398611  | 0.618584826  | 0.536625877 | 0.705791109 | no |
| TMEM56-RWDD3 | -0.034395386 | -0.61852677  | 0.536664085 | 0.705798168 | no |
| GPR182       | -0.034387763 | -0.618389515 | 0.536754423 | 0.70587378  | no |
| SEPHS1       | 0.034373603  | 0.618134582  | 0.536922233 | 0.706051258 | no |
| FAM172BP     | 0.034370371  | 0.618076388  | 0.536960543 | 0.706058433 | no |
| FAT4         | -0.034347642 | -0.617667169 | 0.537229977 | 0.706326926 | no |
| C10orf76     | 0.034347601  | 0.617666428  | 0.537230465 | 0.706326926 | no |
| DSC3         | -0.034335662 | -0.61745149  | 0.53737201  | 0.706453552 | no |
| LINC00550    | -0.034333932 | -0.617420347 | 0.537392521 | 0.706453552 | no |
| GPR128       | 0.034320149  | 0.61717219   | 0.537555968 | 0.706625195 | no |
| SIPA1L3      | -0.034316729 | -0.617110612 | 0.53759653  | 0.706635292 | no |
| SPG200S      | -0.034305851 | -0.616914766 | 0.537725546 | 0.706761648 | no |
| SF3B14       | -0.034294471 | -0.616709878 | 0.537860535 | 0.706864107 | no |
| MRPL15       | -0.034293733 | -0.616696602 | 0.537869282 | 0.706864107 | no |
| LINC00281    | -0.034277028 | -0.61639584  | 0.538067469 | 0.707081325 | no |
| IL31         | -0.034263867 | -0.616158896 | 0.53822363  | 0.707228039 | no |
| OXGR1        | 0.034262072  | 0.616126579  | 0.538244931 | 0.707228039 | no |
| CACHD1       | 0.034244406  | 0.615808511  | 0.538454597 | 0.707425259 | no |
| GCOM1        | -0.034243878 | -0.615799008 | 0.538460862 | 0.707425259 | no |
| THEM5        | 0.034235185  | 0.61564251   | 0.538564039 | 0.707459966 | no |
| GPR89A       | 0.034234866  | 0.61563676   | 0.538567829 | 0.707459966 | no |
| OR6M1        | 0.034233332  | 0.615609146  | 0.538586036 | 0.707459966 | no |
| KLHL41       | -0.034219747 | -0.61536456  | 0.538747312 | 0.707628559 | no |
| LOC729603    | -0.034210145 | -0.61519169  | 0.538861314 | 0.707735042 | no |
| SMARCE1      | -0.034205258 | -0.615103699 | 0.538919346 | 0.707768006 | no |
| TMC4         | -0.034175735 | -0.614572176 | 0.539269963 | 0.708148572 | no |
| ST7L         | 0.034175309  | 0.614564506  | 0.539275023 | 0.708148572 | no |
| MYBPHL       | -0.034167528 | -0.614424414 | 0.539367453 | 0.708226672 | no |
| IMPG1        | -0.0341644   | -0.61436811  | 0.539404604 | 0.708232181 | no |
| MTX2         | -0.034155061 | -0.614199979 | 0.539515549 | 0.708297608 | no |
| ZNF746       | -0.034154513 | -0.6141901   | 0.539522068 | 0.708297608 | no |

|              |              |              |             |             |    |
|--------------|--------------|--------------|-------------|-------------|----|
| RAB31        | -0.034149252 | -0.614095384 | 0.539584574 | 0.708297608 | no |
| LECT1        | -0.034148493 | -0.614081717 | 0.539593593 | 0.708297608 | no |
| GNAT1        | 0.034145304  | 0.614024311  | 0.53963148  | 0.708297608 | no |
| YARS         | -0.034141733 | -0.613960017 | 0.539673913 | 0.708297608 | no |
| XRCC5        | 0.034140788  | 0.613943008  | 0.539685139 | 0.708297608 | no |
| TMEM139      | -0.034117667 | -0.613526736 | 0.539959917 | 0.70861496  | no |
| PALB2        | -0.034110988 | -0.613406492 | 0.540039303 | 0.708675866 | no |
| MCAT         | -0.034090395 | -0.613035745 | 0.540284108 | 0.708911215 | no |
| RPE65        | -0.034090352 | -0.613034968 | 0.540284621 | 0.708911215 | no |
| GLOD5        | 0.034083358  | 0.612909049  | 0.540367778 | 0.70897704  | no |
| CHN2         | 0.034077178  | 0.612797798  | 0.540441254 | 0.709030156 | no |
| GORASP1      | -0.03407019  | -0.612671984 | 0.540524354 | 0.709068175 | no |
| SCARA5       | -0.034069192 | -0.61265402  | 0.54053622  | 0.709068175 | no |
| SP2          | -0.034061049 | -0.612507416 | 0.540633061 | 0.709130644 | no |
| CYP26A1      | -0.034059086 | -0.612472069 | 0.540656411 | 0.709130644 | no |
| BAZ2A        | -0.034056864 | -0.612432075 | 0.540682832 | 0.709130644 | no |
| FLJ41350     | -0.034052639 | -0.612356    | 0.54073309  | 0.70913483  | no |
| FAM227B      | -0.034048081 | -0.61227395  | 0.540787298 | 0.70913483  | no |
| PCDHAC1      | -0.034046507 | -0.612245601 | 0.540806028 | 0.70913483  | no |
| POC1B-GALNT4 | 0.034045499  | 0.612227464  | 0.540818011 | 0.70913483  | no |
| TUBG1        | -0.034040643 | -0.612140033 | 0.540875778 | 0.709167308 | no |
| WDR75        | -0.034036287 | -0.612061617 | 0.540927592 | 0.709191977 | no |
| OSTN         | -0.034025118 | -0.611860537 | 0.541060468 | 0.709246177 | no |
| TAB3         | 0.034025024  | 0.611858838  | 0.541061591 | 0.709246177 | no |
| OR51I2       | -0.034023661 | -0.611834304 | 0.541077805 | 0.709246177 | no |
| OR6K3        | -0.034021717 | -0.611799295 | 0.541100941 | 0.709246177 | no |
| KLLN         | 0.033980796  | 0.611062582  | 0.541587929 | 0.709841201 | no |
| ABHD5        | 0.03396788   | 0.610830048  | 0.541741686 | 0.709999425 | no |
| SNORA37      | -0.033961738 | -0.610719485 | 0.541814801 | 0.710051947 | no |
| FAM194A      | -0.03395758  | -0.610644613 | 0.541864315 | 0.710073537 | no |
| KIAA1024     | -0.033946102 | -0.610437969 | 0.542000988 | 0.71020933  | no |
| B3GNTL1      | 0.033941938  | 0.610363015  | 0.542050566 | 0.71023099  | no |
| SPANXN3      | -0.033932403 | -0.610191345 | 0.542164124 | 0.710336474 | no |
| COQ7         | 0.033926989  | 0.610093872  | 0.542228607 | 0.710377652 | no |
| OR4K2        | -0.033921665 | -0.609998033 | 0.542292013 | 0.71038846  | no |
| CLDN24       | 0.033920745  | 0.609981476  | 0.542302968 | 0.71038846  | no |
| SDR9C7       | -0.033913239 | -0.609846329 | 0.542392386 | 0.710462289 | no |
| RPL13AP6     | 0.033897824  | 0.609568813  | 0.542576025 | 0.71062626  | no |
| MOSPD2       | 0.033894894  | 0.609516061  | 0.542610937 | 0.71062626  | no |
| PDE6B        | 0.033894404  | 0.609507252  | 0.542616766 | 0.71062626  | no |
| BMP8B        | 0.033888319  | 0.609397697  | 0.542689273 | 0.710677909 | no |
| BCAS1        | -0.033883361 | -0.609308437 | 0.542748351 | 0.710711968 | no |
| FAM86JP      | 0.033875794  | 0.609172204  | 0.542838526 | 0.710786739 | no |
| FKBP1A       | 0.033865119  | 0.608980019  | 0.542965748 | 0.71086201  | no |
| DKC1         | 0.033863357  | 0.608948291  | 0.542986753 | 0.71086201  | no |
| PRH1         | -0.033862644 | -0.608935467 | 0.542995243 | 0.71086201  | no |
| FRYL         | -0.033854355 | -0.608786243 | 0.543094039 | 0.710948042 | no |
| GLI2         | -0.033845324 | -0.608623649 | 0.543201698 | 0.710981175 | no |
| CELA3A       | -0.033842497 | -0.608572753 | 0.5432354   | 0.710981175 | no |
| PTH2         | -0.033841747 | -0.608559257 | 0.543244337 | 0.710981175 | no |
| KRT6A        | -0.033840846 | -0.608543028 | 0.543255083 | 0.710981175 | no |

|              |              |              |             |             |    |
|--------------|--------------|--------------|-------------|-------------|----|
| HSD17B10     | 0.033838103  | 0.608493652  | 0.543287781 | 0.710981175 | no |
| LINC00326    | -0.033835581 | -0.60844825  | 0.543317847 | 0.710981175 | no |
| FAM21B       | -0.033823943 | -0.608238721 | 0.543456613 | 0.711119464 | no |
| METTL20      | 0.033817928  | 0.608130439  | 0.543528333 | 0.711170009 | no |
| MAB21L1      | -0.033811568 | -0.608015933 | 0.543604179 | 0.711225948 | no |
| SNAPIN       | 0.033799668  | 0.607801695  | 0.543746102 | 0.711360126 | no |
| ZAN          | -0.033794013 | -0.607699893 | 0.543813547 | 0.711360126 | no |
| LOC727982    | -0.033792807 | -0.607678172 | 0.543827938 | 0.711360126 | no |
| CSN1S2AP     | 0.033789312  | 0.607615266  | 0.543869617 | 0.711360126 | no |
| FAM74A1      | -0.033789093 | -0.607611313 | 0.543872236 | 0.711360126 | no |
| C10orf90     | 0.033784522  | 0.607529024  | 0.543926759 | 0.71138175  | no |
| CTAGE9       | 0.033782157  | 0.607486447  | 0.543954972 | 0.71138175  | no |
| SLC27A6      | 0.033772541  | 0.607313337  | 0.544069684 | 0.711454615 | no |
| RFX6         | -0.033771937 | -0.607302453 | 0.544076897 | 0.711454615 | no |
| ZNF226       | 0.033765093  | 0.607179244  | 0.54415855  | 0.711482057 | no |
| SERTAD4-AS1  | -0.033764312 | -0.607165181 | 0.54416787  | 0.711482057 | no |
| FGFR4        | -0.033761853 | -0.607120925 | 0.544197202 | 0.711482057 | no |
| PSTPIP1      | 0.033755371  | 0.607004216  | 0.544274555 | 0.711488083 | no |
| YPEL2        | 0.033753777  | 0.606975531  | 0.544293569 | 0.711488083 | no |
| TATDN1       | 0.033751212  | 0.606929352  | 0.544324178 | 0.711488083 | no |
| PRSS56       | -0.0337468   | -0.60684992  | 0.54437683  | 0.711488083 | no |
| AK8          | 0.033745874  | 0.606833251  | 0.54438788  | 0.711488083 | no |
| SEMA7A       | 0.033744821  | 0.60681429   | 0.544400448 | 0.711488083 | no |
| RAD51L3-RFFL | 0.033734401  | 0.606626698  | 0.544524809 | 0.711602524 | no |
| CCNB1        | 0.033731935  | 0.606582311  | 0.544554237 | 0.711602524 | no |
| SULT6B1      | -0.033712119 | -0.606225562 | 0.544790782 | 0.71183014  | no |
| TBL1XR1      | -0.033711794 | -0.606219706 | 0.544794665 | 0.71183014  | no |
| SGK110       | 0.033706681  | 0.606127657  | 0.544855708 | 0.711866619 | no |
| BTF3P11      | -0.03369149  | -0.60585418  | 0.545037084 | 0.712060303 | no |
| LCE3D        | -0.033686168 | -0.605758362 | 0.545100641 | 0.712100047 | no |
| OR10G4       | 0.033662866  | 0.605338862  | 0.545378938 | 0.712420298 | no |
| GCNT4        | -0.033651564 | -0.605135391 | 0.545513946 | 0.712553347 | no |
| ATP6V1G1     | 0.033645431  | 0.605024986  | 0.545587211 | 0.712570075 | no |
| FXN          | -0.033644941 | -0.605016162 | 0.545593066 | 0.712570075 | no |
| SLC22A14     | -0.033616148 | -0.604497804 | 0.545937111 | 0.712967852 | no |
| NUP210L      | -0.033613899 | -0.604457326 | 0.545963982 | 0.712967852 | no |
| EXO1         | -0.033605126 | -0.604299388 | 0.546068832 | 0.713061446 | no |
| TNPO1        | -0.033589456 | -0.604017278 | 0.546256143 | 0.713231408 | no |
| RFX2         | 0.033586968  | 0.603972491  | 0.546285883 | 0.713231408 | no |
| PDE8A        | -0.033584967 | -0.603936472 | 0.546309801 | 0.713231408 | no |
| E2F5         | -0.033581266 | -0.603869842 | 0.546354047 | 0.713231408 | no |
| IQCH-AS1     | 0.033580356  | 0.603853457  | 0.546364928 | 0.713231408 | no |
| PTTG2        | 0.033572165  | 0.603705994  | 0.546462861 | 0.713273362 | no |
| GOLGA2       | 0.033572116  | 0.603705114  | 0.546463445 | 0.713273362 | no |
| MIR548H4     | -0.033551508 | -0.603334123 | 0.546709864 | 0.713551664 | no |
| C17orf66     | 0.033544591  | 0.603209604  | 0.546792584 | 0.713616289 | no |
| DCLK3        | 0.033525457  | 0.602865145  | 0.547021447 | 0.713867327 | no |
| C9orf85      | -0.033522956 | -0.602820113 | 0.54705137  | 0.713867327 | no |
| FLJ13224     | -0.033519059 | -0.602749955 | 0.547097991 | 0.713884817 | no |
| TRPT1        | 0.03351096   | 0.602604152  | 0.547194886 | 0.713947007 | no |
| GAPDHS       | -0.033509071 | -0.602570144 | 0.547217487 | 0.713947007 | no |

|              |              |              |             |             |    |
|--------------|--------------|--------------|-------------|-------------|----|
| PCDHB11      | -0.033506745 | -0.602528274 | 0.547245314 | 0.713947007 | no |
| TRAF6        | -0.033494932 | -0.602315615 | 0.54738666  | 0.714047826 | no |
| DCAF12       | 0.033494733  | 0.602312029  | 0.547389044 | 0.714047826 | no |
| TNN          | 0.03348309   | 0.602102421  | 0.547528379 | 0.714186235 | no |
| LOC100128505 | -0.033476792 | -0.601989049 | 0.547603751 | 0.714236174 | no |
| LOC100131825 | -0.033474337 | -0.601944853 | 0.547633134 | 0.714236174 | no |
| ALOX15       | -0.033458368 | -0.601657366 | 0.547824286 | 0.714442122 | no |
| RPL27A       | -0.033450768 | -0.601520551 | 0.547915267 | 0.714517416 | no |
| PRR25        | -0.033446462 | -0.601443033 | 0.54796682  | 0.714541285 | no |
| ZNF526       | 0.033443403  | 0.601387957  | 0.548003448 | 0.714545693 | no |
| PPOX         | -0.033433529 | -0.601210209 | 0.548121671 | 0.714656484 | no |
| HOXC13       | -0.033422723 | -0.601015664 | 0.548251078 | 0.714781844 | no |
| SH3D19       | -0.033418536 | -0.600940297 | 0.548301216 | 0.714792081 | no |
| KRT73        | -0.033416512 | -0.600903868 | 0.54832545  | 0.714792081 | no |
| MPZ          | -0.033391401 | -0.60045181  | 0.548626231 | 0.715135328 | no |
| NANOGNB      | -0.033388181 | -0.600393842 | 0.548664806 | 0.715135328 | no |
| DEFB118      | -0.033386196 | -0.600358107 | 0.548688587 | 0.715135328 | no |
| TDRG1        | 0.033369431  | 0.600056286  | 0.548889463 | 0.715330401 | no |
| FGB          | 0.033367511  | 0.600021728  | 0.548912465 | 0.715330401 | no |
| LOC100499227 | 0.033365371  | 0.599983197  | 0.548938113 | 0.715330401 | no |
| CXorf56      | -0.033360172 | -0.599889605 | 0.549000413 | 0.715368209 | no |
| PDE4B        | -0.033345853 | -0.599631837 | 0.549172015 | 0.715548428 | no |
| ESRP2        | -0.033338237 | -0.599494723 | 0.549263306 | 0.715606209 | no |
| MUSK         | -0.033335566 | -0.599446641 | 0.549295321 | 0.715606209 | no |
| SRRM1        | 0.033333819  | 0.599415203  | 0.549316255 | 0.715606209 | no |
| CYP3A4       | -0.033296803 | -0.598748824 | 0.549760061 | 0.716140954 | no |
| CXorf27      | -0.033277218 | -0.598396252 | 0.549994944 | 0.7164035   | no |
| EDA          | 0.033273189  | 0.598323732  | 0.550043263 | 0.716423016 | no |
| KLK11        | -0.033243273 | -0.59778517  | 0.550402165 | 0.716840617 | no |
| PILRB        | -0.033240903 | -0.59774252  | 0.550430592 | 0.716840617 | no |
| SERPINC1     | 0.033216251  | 0.597298725  | 0.550726435 | 0.71718244  | no |
| UQCDFS1      | -0.033201851 | -0.597039507 | 0.550899271 | 0.71736168  | no |
| WBP11P1      | -0.033199222 | -0.596992175 | 0.550930833 | 0.71736168  | no |
| TAS2R10      | -0.033186733 | -0.596767348 | 0.551080765 | 0.717451208 | no |
| KRT25        | -0.033184242 | -0.596722496 | 0.551110679 | 0.717451208 | no |
| GLB1L2       | 0.033182742  | 0.596695509  | 0.551128677 | 0.717451208 | no |
| AP4E1        | 0.033182372  | 0.59668884   | 0.551133125 | 0.717451208 | no |
| CDC14B       | -0.033178823 | -0.596624949 | 0.551175738 | 0.717454146 | no |
| MARK2        | -0.033176623 | -0.59658535  | 0.55120215  | 0.717454146 | no |
| FCAMR        | -0.033164112 | -0.596360125 | 0.551352384 | 0.71760623  | no |
| SERPINA11    | -0.033146887 | -0.596050034 | 0.55155926  | 0.717832014 | no |
| TGIF2LX      | -0.033143417 | -0.595987577 | 0.551600932 | 0.717842777 | no |
| KRT24        | -0.033138437 | -0.595897922 | 0.551660754 | 0.717877158 | no |
| EPHX2        | 0.03311881   | 0.595544605  | 0.551896536 | 0.718140497 | no |
| OR9A4        | 0.033114953  | 0.595475166  | 0.551942881 | 0.71815732  | no |
| PRDM5        | -0.033099998 | -0.595205957 | 0.552122575 | 0.718347637 | no |
| GOLGA8F      | 0.033095224  | 0.595120008  | 0.552179951 | 0.718378796 | no |
| SPDYE1       | -0.033088376 | -0.594996737 | 0.552262247 | 0.71844237  | no |
| FAM19A3      | 0.033076646  | 0.59478558   | 0.55240323  | 0.718582278 | no |
| LRRC16A      | 0.033071434  | 0.594691744  | 0.552465887 | 0.718620287 | no |
| TBC1D12      | -0.033063078 | -0.594541324 | 0.552566334 | 0.718707443 | no |

|             |              |              |             |             |    |
|-------------|--------------|--------------|-------------|-------------|----|
| SCRN3       | -0.033049552 | -0.594297835 | 0.552728949 | 0.718808551 | no |
| SPATA6L     | -0.033048287 | -0.594275074 | 0.552744152 | 0.718808551 | no |
| SYS1-DBNDD2 | -0.033046771 | -0.594247777 | 0.552762384 | 0.718808551 | no |
| CARNS1      | -0.033045484 | -0.594224612 | 0.552777857 | 0.718808551 | no |
| GRAMD1C     | -0.033041933 | -0.594160683 | 0.552820558 | 0.718820584 | no |
| STAG1       | -0.033039094 | -0.594109578 | 0.552854694 | 0.71882148  | no |
| FAM86C2P    | 0.033029888  | 0.593943857  | 0.552965398 | 0.718921922 | no |
| ARV1        | -0.033026535 | -0.593883496 | 0.553005722 | 0.718926767 | no |
| NKX2-6      | -0.033024015 | -0.593838131 | 0.55303603  | 0.718926767 | no |
| CYP2C19     | -0.033000562 | -0.593415937 | 0.553318128 | 0.719229094 | no |
| CYP27B1     | -0.032999115 | -0.593389899 | 0.553335528 | 0.719229094 | no |
| DYM         | -0.032988826 | -0.593204678 | 0.553459312 | 0.719346482 | no |
| CTSL1P8     | 0.032981475  | 0.593072342  | 0.55354776  | 0.719388447 | no |
| RNF180      | -0.032980578 | -0.593056203 | 0.553558548 | 0.719388447 | no |
| HAS2-AS1    | 0.03297542   | 0.592963342  | 0.553620617 | 0.719425607 | no |
| SYCP3       | 0.032960641  | 0.592697292  | 0.553798468 | 0.71961321  | no |
| HSD11B2     | -0.032948078 | -0.592471148 | 0.553949665 | 0.719766158 | no |
| LBX2        | 0.032939605  | 0.592318612  | 0.55405166  | 0.719855161 | no |
| GK2         | -0.032922588 | -0.592012282 | 0.554256518 | 0.720077792 | no |
| PIP         | 0.032918615  | 0.591940777  | 0.554304343 | 0.720079554 | no |
| CDC20       | 0.032916909  | 0.591910062  | 0.554324887 | 0.720079554 | no |
| FAM223A     | -0.032902962 | -0.591658987 | 0.554492831 | 0.720254182 | no |
| DSCR8       | -0.032894503 | -0.591506726 | 0.554594691 | 0.720342953 | no |
| SFMBT2      | -0.032890641 | -0.59143719  | 0.554641213 | 0.720359842 | no |
| DI02-AS1    | -0.032877736 | -0.591204885 | 0.554796645 | 0.720518171 | no |
| EGFR        | -0.032860849 | -0.590900906 | 0.555000065 | 0.7207388   | no |
| NDUFV2      | -0.032856321 | -0.590819389 | 0.555054623 | 0.720766096 | no |
| ANLN        | -0.032847255 | -0.59065619  | 0.555163854 | 0.720840164 | no |
| MIR496      | -0.032846019 | -0.590633945 | 0.555178744 | 0.720840164 | no |
| DCTN2       | -0.032837799 | -0.590485977 | 0.555277792 | 0.720925212 | no |
| ZFX         | 0.032822396  | 0.590208698  | 0.555463423 | 0.721122654 | no |
| SERPINI2    | 0.032814603  | 0.590068413  | 0.555557351 | 0.721201029 | no |
| CKS1B       | -0.032810983 | -0.590003241 | 0.55560099  | 0.721201333 | no |
| SNORA25     | 0.032809016  | 0.589967829  | 0.555624702 | 0.721201333 | no |
| GCDH        | 0.032804637  | 0.589889017  | 0.555677478 | 0.721226276 | no |
| ELOVL2      | -0.032773043 | -0.589320272 | 0.556058404 | 0.721642359 | no |
| RBM23       | -0.032768414 | -0.589236944 | 0.556114225 | 0.721642359 | no |
| VRTN        | -0.032767665 | -0.589223462 | 0.556123257 | 0.721642359 | no |
| EED         | 0.032766909  | 0.58920986   | 0.556132369 | 0.721642359 | no |
| C7orf26     | 0.032762975  | 0.589139042  | 0.556179813 | 0.721660349 | no |
| THOC7       | -0.032735729 | -0.588648589 | 0.556508439 | 0.722043158 | no |
| C2CD4B      | -0.032718617 | -0.588340553 | 0.556714887 | 0.722192436 | no |
| HEPACAM2    | -0.03271259  | -0.588232051 | 0.556787614 | 0.722192436 | no |
| PCMTD1      | -0.032710802 | -0.588199862 | 0.556809191 | 0.722192436 | no |
| DNAJC24     | -0.032709979 | -0.588185058 | 0.556819114 | 0.722192436 | no |
| CNGB3       | -0.032708679 | -0.588161655 | 0.556834802 | 0.722192436 | no |
| DLG1-AS1    | -0.032708327 | -0.588155316 | 0.556839052 | 0.722192436 | no |
| MSX1        | 0.032706697  | 0.588125968  | 0.556858725 | 0.722192436 | no |
| OR8B3       | 0.03269283   | 0.587876347  | 0.557026071 | 0.722323392 | no |
| IQCF4       | -0.032692759 | -0.587875078 | 0.557026922 | 0.722323392 | no |
| PGR         | -0.032689368 | -0.587814037 | 0.557067847 | 0.722332877 | no |

|              |              |              |             |             |    |
|--------------|--------------|--------------|-------------|-------------|----|
| PROX2        | 0.032685582  | 0.587745886  | 0.557113542 | 0.722341067 | no |
| EHD1         | 0.032683275  | 0.587704359  | 0.557141386 | 0.722341067 | no |
| EXOC3        | -0.032672559 | -0.587511458 | 0.557270737 | 0.722432325 | no |
| DNASE1L3     | -0.032671874 | -0.587499129 | 0.557279005 | 0.722432325 | no |
| GIF          | -0.032665498 | -0.587384351 | 0.557355977 | 0.722488528 | no |
| TP53INP2     | 0.032651998  | 0.587141345  | 0.557518959 | 0.722614684 | no |
| DAZ2         | -0.032651867 | -0.587138977 | 0.557520547 | 0.722614684 | no |
| RPL10L       | -0.032633977 | -0.586816938 | 0.557736573 | 0.722851085 | no |
| COPB1        | 0.032630742  | 0.586758709  | 0.557775637 | 0.722858121 | no |
| MIA3         | -0.03262694  | -0.586690278 | 0.557821548 | 0.722860079 | no |
| DDX54        | -0.032625047 | -0.586656188 | 0.557844419 | 0.722860079 | no |
| ST8SIA5      | -0.032620692 | -0.586577794 | 0.557897018 | 0.722884651 | no |
| SFSWAP       | -0.032614555 | -0.586467328 | 0.557971139 | 0.722937104 | no |
| WFDC10A      | -0.032597257 | -0.586155953 | 0.558180092 | 0.723057456 | no |
| SEBOX        | -0.03259607  | -0.586134574 | 0.55819444  | 0.723057456 | no |
| IFT172       | -0.032592959 | -0.586078586 | 0.558232016 | 0.723057456 | no |
| NBPF7        | -0.032592753 | -0.586074871 | 0.55823451  | 0.723057456 | no |
| RPL10A       | -0.032590279 | -0.586030345 | 0.558264394 | 0.723057456 | no |
| NRAP         | -0.032590155 | -0.586028108 | 0.558265896 | 0.723057456 | no |
| NES          | 0.032585852  | 0.585950642  | 0.558317891 | 0.723081221 | no |
| LOC100507091 | -0.032573453 | -0.58572745  | 0.558467709 | 0.723225762 | no |
| F9           | 0.032571045  | 0.585684114  | 0.558496801 | 0.723225762 | no |
| ZHX1-C8ORF76 | -0.032560571 | -0.585495567 | 0.558623382 | 0.723346093 | no |
| CD101        | 0.032547394  | 0.58525837   | 0.558782644 | 0.723466043 | no |
| TUBB         | -0.032547336 | -0.585257327 | 0.558783344 | 0.723466043 | no |
| LINC00111    | -0.032533275 | -0.585004224 | 0.558953311 | 0.723642507 | no |
| NANOS2       | -0.032521507 | -0.584792393 | 0.559095582 | 0.723783095 | no |
| AHI1         | 0.032513332  | 0.584645233  | 0.559194429 | 0.723800901 | no |
| MFSD10       | 0.032509912  | 0.58458367   | 0.559235782 | 0.723800901 | no |
| FLJ27354     | -0.032508656 | -0.584561063 | 0.559250969 | 0.723800901 | no |
| PANX3        | -0.032506198 | -0.58451682  | 0.55928069  | 0.723800901 | no |
| LOC286238    | 0.0325046    | 0.584488054  | 0.559300014 | 0.723800901 | no |
| FAM65A       | 0.032503658  | 0.584471087  | 0.559311413 | 0.723800901 | no |
| MAGEB10      | -0.032497606 | -0.58436216  | 0.559384591 | 0.723826897 | no |
| MRPL23       | 0.032496426  | 0.58434092   | 0.559398861 | 0.723826897 | no |
| ATP6VOA2     | -0.032492904 | -0.584277505 | 0.559441467 | 0.723838444 | no |
| TOP1P2       | -0.032482866 | -0.584096813 | 0.559562874 | 0.723879321 | no |
| LZIC         | 0.032482222  | 0.584085234  | 0.559570655 | 0.723879321 | no |
| CXXC5        | -0.032481937 | -0.584080095 | 0.559574108 | 0.723879321 | no |
| OR6C70       | 0.032473782  | 0.583933303  | 0.559672749 | 0.723963346 | no |
| C9orf174     | 0.032463395  | 0.583746334  | 0.559798399 | 0.724082299 | no |
| RNF224       | 0.032459808  | 0.583681759  | 0.559841799 | 0.724094855 | no |
| DNTTIP1      | 0.032456104  | 0.583615095  | 0.559886605 | 0.724109228 | no |
| APH1B        | 0.032448246  | 0.583473647  | 0.55998168  | 0.724188608 | no |
| SMIM5        | 0.032445229  | 0.583419339  | 0.560018185 | 0.724192239 | no |
| SEC16A       | 0.032439724  | 0.583320235  | 0.560084806 | 0.724233172 | no |
| LY6G6E       | -0.032436249 | -0.583257694 | 0.56012685  | 0.724233172 | no |
| ORC2         | 0.032427794  | 0.583105482  | 0.560229182 | 0.724233172 | no |
| RALA         | 0.032427668  | 0.583103214  | 0.560230706 | 0.724233172 | no |
| OR13G1       | -0.032422378 | -0.583008006 | 0.560294719 | 0.724233172 | no |
| SRC          | -0.032420832 | -0.582980167 | 0.560313437 | 0.724233172 | no |

|              |              |              |             |             |    |
|--------------|--------------|--------------|-------------|-------------|----|
| PLEKHH3      | 0.032419444  | 0.582955192  | 0.56033023  | 0.724233172 | no |
| RBAK         | 0.032415447  | 0.58288324   | 0.560378611 | 0.724233172 | no |
| TMEM147      | -0.032414857 | -0.582872615 | 0.560385755 | 0.724233172 | no |
| AGMO         | -0.032412725 | -0.582834231 | 0.560411565 | 0.724233172 | no |
| RAPSN        | -0.032411984 | -0.582820897 | 0.560420532 | 0.724233172 | no |
| MRPS14       | -0.032386006 | -0.582353281 | 0.560735019 | 0.724596012 | no |
| EPAS1        | 0.03238191   | 0.582279555  | 0.56078461  | 0.724616525 | no |
| IKZF1        | 0.032376847  | 0.582188419  | 0.560845914 | 0.72465217  | no |
| NKAPL        | 0.032370339  | 0.582071267  | 0.560924724 | 0.724710427 | no |
| DUSP12       | -0.032367032 | -0.58201174  | 0.56096477  | 0.724718598 | no |
| ZNF826P      | -0.032359671 | -0.581879232 | 0.561053919 | 0.724790201 | no |
| CCDC151      | 0.032337145  | 0.581473756  | 0.56132676  | 0.72509908  | no |
| ZNF790-AS1   | -0.032331779 | -0.581377176 | 0.561391758 | 0.725139456 | no |
| NEK5         | -0.032313586 | -0.581049693 | 0.561612177 | 0.72538057  | no |
| CTDSP2       | 0.032308874  | 0.580964873  | 0.561669273 | 0.725410718 | no |
| SLC13A3      | 0.03230161   | 0.580834118  | 0.561757297 | 0.725480805 | no |
| TOR1AIP1     | -0.032291537 | -0.580652802 | 0.561879369 | 0.725594852 | no |
| TRAFD1       | -0.032284545 | -0.580526937 | 0.561964116 | 0.725628725 | no |
| LOC100507489 | -0.032283801 | -0.580513552 | 0.561973128 | 0.725628725 | no |
| SNORA77      | -0.032279042 | -0.580427883 | 0.562030815 | 0.725659612 | no |
| TMPRSS11E    | 0.032275509  | 0.580364298  | 0.562073632 | 0.725659732 | no |
| LOC100505474 | -0.032271852 | -0.580298466 | 0.562117964 | 0.725659732 | no |
| PLEKHA5      | -0.032270677 | -0.58027732  | 0.562132205 | 0.725659732 | no |
| NIPSNAP3B    | 0.032264961  | 0.580174429  | 0.562201498 | 0.725688117 | no |
| LINC00623    | 0.032263293  | 0.580144392  | 0.562221727 | 0.725688117 | no |
| PTCRA        | -0.032253632 | -0.579970497 | 0.56233885  | 0.725795701 | no |
| FOXE1        | -0.03225002  | -0.579905487 | 0.562382638 | 0.725808629 | no |
| C10orf71     | -0.032237895 | -0.579687233 | 0.56252966  | 0.725954778 | no |
| ANTXR2       | 0.032231709  | 0.579575882  | 0.562604676 | 0.726007992 | no |
| ZP2          | 0.032221866  | 0.5793987    | 0.562724052 | 0.726118439 | no |
| KRTAP19-1    | -0.032219034 | -0.579347721 | 0.562758402 | 0.726119165 | no |
| PHOX2A       | 0.032208415  | 0.579156573  | 0.562887204 | 0.726241755 | no |
| SIM1         | -0.032200307 | -0.579010633 | 0.562985555 | 0.726314711 | no |
| LOC728463    | 0.032198181  | 0.578972367  | 0.563011343 | 0.726314711 | no |
| SERINC2      | 0.032176007  | 0.578573231  | 0.563280371 | 0.726618155 | no |
| CDCA2        | 0.032167814  | 0.578425754  | 0.563379791 | 0.726685071 | no |
| SEMA4B       | -0.03216379  | -0.578353327 | 0.563428619 | 0.726685071 | no |
| SFXN5        | -0.032162356 | -0.578327506 | 0.563446028 | 0.726685071 | no |
| IL1F10       | 0.032160586  | 0.578295659  | 0.563467499 | 0.726685071 | no |
| MIR3973      | -0.032150098 | -0.578106866 | 0.563594793 | 0.726779705 | no |
| ADAM3A       | -0.032148104 | -0.578070978 | 0.563618992 | 0.726779705 | no |
| OFD1         | -0.032146181 | -0.578036365 | 0.563642331 | 0.726779705 | no |
| CMC4         | 0.03213362   | 0.577810261  | 0.563794807 | 0.726887132 | no |
| OR7A17       | -0.032132915 | -0.577797576 | 0.563803361 | 0.726887132 | no |
| HGC6.3       | 0.032130959  | 0.577762357  | 0.563827113 | 0.726887132 | no |
| TRMT2A       | -0.032124969 | -0.577654541 | 0.56389983  | 0.726911501 | no |
| DDX39B       | -0.032123829 | -0.577634029 | 0.563913664 | 0.726911501 | no |
| LRP2         | -0.032118426 | -0.577536776 | 0.56397926  | 0.726952455 | no |
| LGSN         | -0.032102437 | -0.57724897  | 0.564173404 | 0.727159088 | no |
| TUSC2        | -0.032097309 | -0.577156669 | 0.564235674 | 0.727195735 | no |
| TCEB3B       | -0.032092598 | -0.577071868 | 0.564292887 | 0.727198504 | no |



|              |              |              |             |             |    |
|--------------|--------------|--------------|-------------|-------------|----|
| IGSF9        | -0.03209156  | -0.577053178 | 0.564305498 | 0.727198504 | no |
| GUCY2F       | -0.032079096 | -0.576828823 | 0.564456879 | 0.727328851 | no |
| SPATA16      | 0.032077659  | 0.576802956  | 0.564474334 | 0.727328851 | no |
| KRAS         | -0.032071786 | -0.576697248 | 0.564545667 | 0.727377154 | no |
| TMEM205      | -0.032066837 | -0.576608168 | 0.564605784 | 0.727411    | no |
| TMSB4Y       | -0.032051469 | -0.576331538 | 0.564792488 | 0.727572863 | no |
| SLC12A8      | -0.032050922 | -0.5763217   | 0.564799129 | 0.727572863 | no |
| NCBP2        | -0.032038387 | -0.576096074 | 0.564951432 | 0.727725439 | no |
| CEACAM6      | -0.032028926 | -0.575925776 | 0.565066401 | 0.727829909 | no |
| PTPRF        | -0.032022256 | -0.575805721 | 0.565147458 | 0.727890688 | no |
| OR52E4       | 0.032018529  | 0.575738622  | 0.565192763 | 0.727905415 | no |
| ZNRF4        | -0.032006559 | -0.575523165 | 0.565338251 | 0.728049158 | no |
| C7orf53      | 0.032001393  | 0.575430188  | 0.565401039 | 0.728086388 | no |
| POLR2E       | -0.031989161 | -0.57521001  | 0.565549741 | 0.728234242 | no |
| LINC00559    | -0.031985184 | -0.575138423 | 0.565598093 | 0.72823714  | no |
| SCP2D1       | -0.031983402 | -0.575106341 | 0.565619764 | 0.72823714  | no |
| DDX28        | 0.031967439  | 0.574819018  | 0.565813853 | 0.728443391 | no |
| CLK1         | -0.03194849  | -0.574477936 | 0.5660443   | 0.728672765 | no |
| EPG5         | -0.031947213 | -0.574454953 | 0.56605983  | 0.728672765 | no |
| TTC31        | 0.031920154  | 0.573967897  | 0.566388985 | 0.729052808 | no |
| TMEM80       | -0.031915011 | -0.573875325 | 0.566451556 | 0.729089681 | no |
| DTX3         | -0.03191137  | -0.573809784 | 0.566495859 | 0.729103036 | no |
| TMEM212      | 0.031893114  | 0.573481181  | 0.566718002 | 0.729345266 | no |
| ACTR3BP5     | 0.031875766  | 0.573168928  | 0.566929132 | 0.729573292 | no |
| APLP2        | 0.031870449  | 0.57307323   | 0.566993846 | 0.729612882 | no |
| GCGR         | -0.031866558 | -0.573003195 | 0.567041208 | 0.72963014  | no |
| SLC17A4      | -0.031856726 | -0.572826212 | 0.567160903 | 0.729740463 | no |
| STAU1        | -0.031843709 | -0.57259192  | 0.567319376 | 0.729859486 | no |
| SALL4        | -0.031841752 | -0.572556695 | 0.567343203 | 0.729859486 | no |
| LOC100507118 | -0.031840759 | -0.572538824 | 0.567355292 | 0.729859486 | no |
| SNORA23      | -0.031835774 | -0.57244909  | 0.567415994 | 0.729893885 | no |
| FAM194B      | -0.031827428 | -0.572298862 | 0.567517627 | 0.729980926 | no |
| YTHDC2       | 0.031817489  | 0.572119971  | 0.567638661 | 0.730092912 | no |
| RNF17        | -0.031809595 | -0.571977887 | 0.567734801 | 0.730172867 | no |
| LOC729013    | -0.031789988 | -0.57162496  | 0.567973641 | 0.730436331 | no |
| PLD2         | 0.031786935  | 0.571570008  | 0.568010834 | 0.730440452 | no |
| SSSCA1       | -0.0317835   | -0.571508191 | 0.568052675 | 0.730450549 | no |
| GSX2         | 0.03177915   | 0.571429884  | 0.568105678 | 0.730474999 | no |
| PRKAG2       | 0.031768216  | 0.571233083  | 0.568238897 | 0.730602581 | no |
| PDYN         | -0.031756386 | -0.571020145 | 0.568383057 | 0.730744214 | no |
| TRMT13       | 0.031743168  | 0.570782221  | 0.568544152 | 0.730900733 | no |
| DKFZp6860132 | 0.031738224  | 0.570693235  | 0.56860441  | 0.730900733 | no |
| RCAN2        | 0.031738025  | 0.570689662  | 0.568606829 | 0.730900733 | no |
| PEX14        | -0.031732998 | -0.570599167 | 0.568668112 | 0.730935789 | no |
| NRD1         | 0.031727105  | 0.570493106  | 0.568739939 | 0.730984393 | no |
| ZNRF2P2      | -0.031721598 | -0.570393979 | 0.568807075 | 0.731026961 | no |
| PIK3R3       | -0.031714966 | -0.570274608 | 0.568887926 | 0.73108715  | no |
| LOC100862671 | -0.03169794  | -0.569968162 | 0.56909551  | 0.731310189 | no |
| ANKMY2       | 0.031694894  | 0.569913333  | 0.569132654 | 0.731314192 | no |
| RALGAPA1     | -0.031691942 | -0.569860197 | 0.569168652 | 0.731316723 | no |
| USP28        | -0.031679584 | -0.569637761 | 0.569319361 | 0.731466634 | no |

|              |              |              |             |             |    |
|--------------|--------------|--------------|-------------|-------------|----|
| LINC00685    | -0.031675218 | -0.569559181 | 0.569372606 | 0.731491313 | no |
| KRTAP22-1    | -0.031666608 | -0.569404208 | 0.569477622 | 0.731564008 | no |
| LOC100873065 | -0.031664998 | -0.569375213 | 0.569497271 | 0.731564008 | no |
| GBX2         | -0.031653786 | -0.569173418 | 0.569634032 | 0.731695952 | no |
| OR52H1       | 0.031646545  | 0.569043073  | 0.569722377 | 0.731728331 | no |
| DPP3         | -0.031646138 | -0.569035758 | 0.569727336 | 0.731728331 | no |
| ADAL         | -0.031639719 | -0.568920216 | 0.569805654 | 0.731752685 | no |
| NDUFB11      | -0.031638959 | -0.568906532 | 0.569814929 | 0.731752685 | no |
| TPTE2P5      | -0.031636212 | -0.568857089 | 0.569848445 | 0.731752685 | no |
| YEATS4       | -0.031622822 | -0.56861609  | 0.570011825 | 0.731898433 | no |
| PVR          | 0.031621328  | 0.568589197  | 0.570030058 | 0.731898433 | no |
| ACIN1        | -0.031610266 | -0.56839008  | 0.570165064 | 0.731992041 | no |
| CPT1C        | -0.031608791 | -0.568363537 | 0.570183062 | 0.731992041 | no |
| CKLF-CMTM1   | -0.031606982 | -0.568330971 | 0.570205144 | 0.731992041 | no |
| PGPEP1L      | -0.031600052 | -0.568206244 | 0.570289722 | 0.732056888 | no |
| OR7D4        | -0.031595203 | -0.568118965 | 0.570348911 | 0.732089138 | no |
| ELAC2        | 0.031588671  | 0.568001394  | 0.570428646 | 0.732147756 | no |
| TAS2R7       | 0.031581998  | 0.567881284  | 0.570510109 | 0.732208584 | no |
| COX8C        | -0.031578059 | -0.567810397 | 0.570558189 | 0.732226564 | no |
| TSP02        | -0.031570352 | -0.56767167  | 0.570652289 | 0.732303598 | no |
| SLC41A3      | -0.031566914 | -0.56760979  | 0.570694266 | 0.732313737 | no |
| SKA3         | -0.031552073 | -0.567342658 | 0.570875491 | 0.732483915 | no |
| SAV1         | 0.031550471  | 0.567313826  | 0.570895053 | 0.732483915 | no |
| MRPS11       | 0.03153509   | 0.56703699   | 0.571082895 | 0.73268008  | no |
| WDHD1        | -0.031532369 | -0.566988017 | 0.571116128 | 0.73268008  | no |
| INTS5        | -0.03152313  | -0.566821711 | 0.571228989 | 0.732765327 | no |
| UCHL3        | 0.031521346  | 0.566789617  | 0.57125077  | 0.732765327 | no |
| GEN1         | -0.031516075 | -0.566694744 | 0.57131516  | 0.732804183 | no |
| DNAJB3       | -0.031508543 | -0.566559175 | 0.571407176 | 0.732878469 | no |
| ZNF324       | -0.031499184 | -0.566390711 | 0.57152153  | 0.732981392 | no |
| ENPP6        | -0.031488146 | -0.566192038 | 0.571656403 | 0.733084534 | no |
| KRTAP20-2    | -0.031487019 | -0.566171754 | 0.571670174 | 0.733084534 | no |
| H3F3AP4      | 0.031481119  | 0.566065565  | 0.57174227  | 0.733133241 | no |
| NOS1         | 0.031477581  | 0.566001887  | 0.571785505 | 0.733138804 | no |
| LINC00433    | -0.031475181 | -0.565958689 | 0.571814836 | 0.733138804 | no |
| JAG2         | -0.031463094 | -0.565741135 | 0.571962564 | 0.733227259 | no |
| DKFZP434A062 | -0.03146203  | -0.565721975 | 0.571975575 | 0.733227259 | no |
| MAOA         | -0.031461162 | -0.565706358 | 0.57198618  | 0.733227259 | no |
| AMELY        | -0.031453928 | -0.565576157 | 0.572074603 | 0.733263556 | no |
| KCNQ1DN      | -0.031453263 | -0.565564183 | 0.572082735 | 0.733263556 | no |
| AGK          | 0.03143545   | 0.565243571  | 0.572300498 | 0.733498927 | no |
| RND3         | 0.031428092  | 0.565111143  | 0.572390457 | 0.733556665 | no |
| CCDC126      | 0.031423431  | 0.565027243  | 0.572447453 | 0.733556665 | no |
| SGCB         | -0.031423391 | -0.565026516 | 0.572447947 | 0.733556665 | no |
| GABARAP      | 0.031418693  | 0.564941959  | 0.572505393 | 0.733586537 | no |
| ADTRP        | 0.031414317  | 0.564863198  | 0.572558904 | 0.733611364 | no |
| USH1G        | -0.031406072 | -0.564714808 | 0.572659727 | 0.733696804 | no |
| LINC00489    | -0.031394347 | -0.564503762 | 0.572803137 | 0.733795187 | no |
| PLAGL2       | 0.031391548  | 0.564453387  | 0.572837369 | 0.733795187 | no |
| LCE3E        | -0.031391419 | -0.564451063 | 0.572838949 | 0.733795187 | no |
| DMKN         | -0.031380467 | -0.564253948 | 0.572972911 | 0.733923044 | no |

|              |              |              |             |             |    |
|--------------|--------------|--------------|-------------|-------------|----|
| BCL2L11      | 0.031371799  | 0.564097921  | 0.573078961 | 0.734015135 | no |
| ADAM23       | -0.031349539 | -0.563697267 | 0.573351322 | 0.734320218 | no |
| IQCF3        | -0.031335592 | -0.563446256 | 0.573521989 | 0.734495028 | no |
| GUCY2EP      | -0.031289251 | -0.562612168 | 0.574089272 | 0.735177723 | no |
| CYB5R2       | 0.031283701  | 0.562512281  | 0.574157226 | 0.735220934 | no |
| NROB1        | -0.0312668   | -0.562208082 | 0.574364197 | 0.735442145 | no |
| C5orf64      | -0.031260705 | -0.562098391 | 0.574438838 | 0.735467801 | no |
| MC3R         | -0.031259575 | -0.562078052 | 0.574452678 | 0.735467801 | no |
| G3BP2        | 0.031209493  | 0.561176639  | 0.575066236 | 0.736209476 | no |
| ZNF564       | -0.03120157  | -0.561034042 | 0.575163325 | 0.73628991  | no |
| SLC39A2      | 0.031195189  | 0.560919192  | 0.575241527 | 0.736346159 | no |
| BCL2         | 0.031174819  | 0.56055257   | 0.575491198 | 0.736476194 | no |
| AKR1D1       | -0.03117181  | -0.560498405 | 0.575528089 | 0.736476194 | no |
| GAS8         | 0.031171039  | 0.560484535  | 0.575537536 | 0.736476194 | no |
| SPDYA        | 0.031170762  | 0.56047955   | 0.575540931 | 0.736476194 | no |
| ATP2B4       | -0.031170205 | -0.56046951  | 0.575547769 | 0.736476194 | no |
| KRTAP9-1     | -0.0311687   | -0.560442439 | 0.575566208 | 0.736476194 | no |
| VEZT         | 0.031167331  | 0.560417792  | 0.575582995 | 0.736476194 | no |
| PABPC4L      | 0.031146845  | 0.560049076  | 0.575834163 | 0.736739214 | no |
| GUSBP9       | -0.031143234 | -0.559984083 | 0.575878441 | 0.736739214 | no |
| TARBP2       | 0.031142177  | 0.559965064  | 0.575891399 | 0.736739214 | no |
| PI15         | 0.031139037  | 0.559908542  | 0.575929908 | 0.736744622 | no |
| XYLT1        | -0.031132968 | -0.559799317 | 0.576004327 | 0.736795965 | no |
| ZC3H14       | 0.031124942  | 0.559654864  | 0.576102756 | 0.73687801  | no |
| GABRP        | 0.031119395  | 0.559555021  | 0.576170793 | 0.736921176 | no |
| KRT14        | -0.031112834 | -0.559436926 | 0.576251272 | 0.736939856 | no |
| CXorf61      | -0.031112613 | -0.559432953 | 0.57625398  | 0.736939856 | no |
| SLC35E3      | -0.031109009 | -0.559368099 | 0.576298178 | 0.736952526 | no |
| OR10H5       | -0.031100358 | -0.559212393 | 0.576404301 | 0.737000253 | no |
| OR5K1        | -0.031100058 | -0.559206984 | 0.576407988 | 0.737000253 | no |
| LOC100129216 | -0.031096983 | -0.55915164  | 0.57644571  | 0.737000253 | no |
| ZNF398       | -0.031094785 | -0.55911208  | 0.576472675 | 0.737000253 | no |
| COX11        | 0.0310877    | 0.558984573  | 0.57655959  | 0.737050193 | no |
| MLIP-IT1     | -0.031083392 | -0.558907028 | 0.576612451 | 0.737050193 | no |
| GJA10        | -0.031083215 | -0.55890384  | 0.576614624 | 0.737050193 | no |
| NTN5         | -0.031074424 | -0.558745622 | 0.576722487 | 0.737129365 | no |
| CCNA1        | -0.031072576 | -0.558712363 | 0.576745162 | 0.737129365 | no |
| LGALS16      | -0.031061108 | -0.558505962 | 0.57688589  | 0.737265381 | no |
| TMEM252      | 0.031049158  | 0.558290879  | 0.577032554 | 0.737408968 | no |
| UNC93A       | -0.031046013 | -0.558234263 | 0.577071163 | 0.737414459 | no |
| WDR70        | -0.031040534 | -0.558135651 | 0.577138414 | 0.737456547 | no |
| TPBGL        | 0.031032682  | 0.55799434   | 0.577234792 | 0.737535845 | no |
| SPATA4       | 0.03102458   | 0.557848517  | 0.577334254 | 0.737619075 | no |
| PAPL         | -0.031021353 | -0.557790434 | 0.577373874 | 0.737625843 | no |
| KRTAP21-1    | -0.0310144   | -0.557665294 | 0.577459239 | 0.737673494 | no |
| RP1L1        | -0.031011018 | -0.557604434 | 0.577500757 | 0.737673494 | no |
| TIA1         | 0.031009928  | 0.557584805  | 0.577514148 | 0.737673494 | no |
| RXFP2        | -0.031000736 | -0.557419372 | 0.577627012 | 0.73777381  | no |
| TGS1         | 0.030990622  | 0.557237339  | 0.577751214 | 0.737888593 | no |
| RIN2         | 0.030977926  | 0.557008836  | 0.577907141 | 0.738043877 | no |
| BCAR4        | -0.030965749 | -0.556789672 | 0.578056714 | 0.738191029 | no |

|              |              |              |             |             |    |
|--------------|--------------|--------------|-------------|-------------|----|
| KLF17        | 0.030944144  | 0.556400821  | 0.578322137 | 0.738430597 | no |
| APTX         | -0.030943196 | -0.556383753 | 0.578333789 | 0.738430597 | no |
| INTS9        | -0.03094036  | -0.556332713 | 0.578368632 | 0.738430597 | no |
| MIDN         | -0.030939292 | -0.556313495 | 0.578381752 | 0.738430597 | no |
| LOC90784     | 0.030928916  | 0.556126747  | 0.57850925  | 0.738549501 | no |
| OR2H1        | -0.03091359  | -0.555850905 | 0.578697599 | 0.738735989 | no |
| LOC100130093 | -0.030909237 | -0.555772557 | 0.578751102 | 0.738735989 | no |
| NBPF22P      | -0.030908639 | -0.555761797 | 0.57875845  | 0.738735989 | no |
| LLGL2        | 0.0308872    | 0.555375946  | 0.579021976 | 0.739028464 | no |
| CUTA         | -0.030879194 | -0.555231851 | 0.579120404 | 0.739110197 | no |
| HYLS1        | 0.030874591  | 0.555149012  | 0.579176993 | 0.739122765 | no |
| NSMAF        | -0.030872671 | -0.555114456 | 0.5792006   | 0.739122765 | no |
| DDX43        | 0.030870001  | 0.555066401  | 0.579233428 | 0.739122765 | no |
| HOXC8        | -0.030858342 | -0.554856557 | 0.579376795 | 0.739195637 | no |
| ZNF749       | -0.030855451 | -0.554804518 | 0.579412351 | 0.739195637 | no |
| LZTS2        | -0.030854928 | -0.554795111 | 0.579418778 | 0.739195637 | no |
| CCDC54       | -0.030854168 | -0.554781441 | 0.579428118 | 0.739195637 | no |
| UCA1         | -0.03084771  | -0.554665208 | 0.57950754  | 0.739242732 | no |
| CYLC1        | -0.030845573 | -0.554626734 | 0.579533831 | 0.739242732 | no |
| PRDM7        | -0.030839326 | -0.55451431  | 0.579610656 | 0.739296849 | no |
| ANKRD44      | -0.030829431 | -0.554336218 | 0.579732366 | 0.739408206 | no |
| MYNN         | -0.030826285 | -0.554279601 | 0.579771061 | 0.739408524 | no |
| OR10K1       | -0.030823817 | -0.554235173 | 0.579801426 | 0.739408524 | no |
| DUSP4        | 0.03081792   | 0.554129043  | 0.579873966 | 0.739457153 | no |
| DNLZ         | -0.030807763 | -0.553946237 | 0.579998924 | 0.739572616 | no |
| MTA2         | -0.030803947 | -0.553877573 | 0.580045864 | 0.739588588 | no |
| LINC00640    | -0.030792319 | -0.55366828  | 0.580188948 | 0.73972714  | no |
| LOC157273    | 0.03078538   | 0.553543394  | 0.580274335 | 0.739789712 | no |
| NOL9         | 0.030779714  | 0.553441425  | 0.580344057 | 0.739789712 | no |
| SPINT3       | -0.030778104 | -0.553412453 | 0.580363868 | 0.739789712 | no |
| MMACHC       | -0.030777141 | -0.553395124 | 0.580375718 | 0.739789712 | no |
| DNAJB9       | 0.030767624  | 0.553223833  | 0.580492852 | 0.739895136 | no |
| TMEM200C     | -0.030763629 | -0.553151926 | 0.580542028 | 0.739913932 | no |
| SRSF2        | -0.030755942 | -0.553013575 | 0.580636648 | 0.739990643 | no |
| C17orf107    | 0.030745204  | 0.552820323  | 0.580768829 | 0.740115211 | no |
| SNORD10      | -0.030729331 | -0.552534643 | 0.580964255 | 0.740315824 | no |
| FAM71C       | -0.030723685 | -0.552433038 | 0.581033767 | 0.740315824 | no |
| KLK12        | 0.030722545  | 0.552412518  | 0.581047807 | 0.740315824 | no |
| GUCA2B       | -0.030721227 | -0.552388789 | 0.581064042 | 0.740315824 | no |
| GMNC         | 0.030711593  | 0.55221541   | 0.58118267  | 0.74042307  | no |
| PAPOLB       | 0.030696027  | 0.551935249  | 0.581374384 | 0.740623408 | no |
| POM121L2     | -0.030683325 | -0.551706638 | 0.581530844 | 0.740778814 | no |
| ID2          | -0.030675304 | -0.551562287 | 0.581629648 | 0.740833384 | no |
| SIMC1        | 0.030674251  | 0.551543327  | 0.581642627 | 0.740833384 | no |
| FOXD3        | -0.030661303 | -0.551310308 | 0.581802138 | 0.740992637 | no |
| USP38        | 0.030655739  | 0.551210157  | 0.581870703 | 0.741036046 | no |
| SSPN         | -0.030650954 | -0.551124054 | 0.581929653 | 0.741036242 | no |
| CEBPG        | 0.030650129  | 0.551109205  | 0.581939819 | 0.741036242 | no |
| SEC14L1      | -0.030643413 | -0.550988321 | 0.582022587 | 0.741097726 | no |
| APOL4        | 0.030636014  | 0.550855161  | 0.582113766 | 0.741169912 | no |
| POLR2J4      | 0.03062422   | 0.550642906  | 0.582259119 | 0.741311062 | no |

|              |              |              |             |             |    |
|--------------|--------------|--------------|-------------|-------------|----|
| LOC100506497 | -0.030619199 | -0.550552532 | 0.582321012 | 0.741344954 | no |
| ABCC11       | -0.030616463 | -0.550503301 | 0.58235473  | 0.741344954 | no |
| SGCE         | 0.030606107  | 0.550316914  | 0.582482392 | 0.741463549 | no |
| OR10S1       | -0.030597936 | -0.550169851 | 0.582583129 | 0.741520992 | no |
| MIA          | -0.030596849 | -0.550150294 | 0.582596526 | 0.741520992 | no |
| PAEP         | -0.030575141 | -0.549759597 | 0.582864194 | 0.741730913 | no |
| ZIC2         | -0.030573569 | -0.549731316 | 0.582883571 | 0.741730913 | no |
| NUDT14       | 0.030573047  | 0.549721918  | 0.582890011 | 0.741730913 | no |
| PRR7-AS1     | 0.030572277  | 0.549708053  | 0.582899511 | 0.741730913 | no |
| OR11A1       | 0.030568773  | 0.549644987  | 0.582942724 | 0.741741982 | no |
| GRXCR1       | -0.03056552  | -0.549586453 | 0.582982833 | 0.741749101 | no |
| PCDHB17      | 0.030551498  | 0.549334087  | 0.583155777 | 0.741925219 | no |
| RNF212       | -0.03054384  | -0.54919626  | 0.583250238 | 0.742001472 | no |
| L3MBTL3      | 0.030539791  | 0.549123394  | 0.583300181 | 0.742021084 | no |
| NEUROG3      | -0.030532027 | -0.548983667 | 0.583395955 | 0.742036847 | no |
| TIMM10B      | 0.030528684  | 0.548923494  | 0.583437203 | 0.742036847 | no |
| SPANXN2      | -0.030525453 | -0.54886535  | 0.583477061 | 0.742036847 | no |
| SPINK2       | 0.0305246    | 0.54884999   | 0.583487591 | 0.742036847 | no |
| CIC          | -0.030523051 | -0.548822108 | 0.583506704 | 0.742036847 | no |
| LOC100129046 | 0.03051772   | 0.548726167  | 0.583572476 | 0.742036847 | no |
| MCCC2        | -0.03051739  | -0.548720236 | 0.583576542 | 0.742036847 | no |
| RPS11        | -0.030514032 | -0.548659804 | 0.583617973 | 0.742036847 | no |
| ASB9P1       | -0.030513599 | -0.548652001 | 0.583623323 | 0.742036847 | no |
| FAM179A      | 0.030501585  | 0.548435794  | 0.583771562 | 0.742181414 | no |
| HIST1H2AJ    | 0.030497409  | 0.548360622  | 0.583823106 | 0.742187128 | no |
| CMAS         | -0.030495214 | -0.548321134 | 0.583850184 | 0.742187128 | no |
| LAMA5        | 0.030492826  | 0.548278149  | 0.58387966  | 0.742187128 | no |
| CAMTA2       | 0.030485619  | 0.548148449  | 0.583968602 | 0.742252861 | no |
| DLX6-AS1     | -0.030483039 | -0.548102013 | 0.584000448 | 0.742252861 | no |
| SNAR-H       | -0.03046692  | -0.547811903 | 0.584199422 | 0.742442187 | no |
| POU5F1       | 0.030465374  | 0.547784086  | 0.584218502 | 0.742442187 | no |
| VAC14        | 0.030461166  | 0.547708358  | 0.584270446 | 0.742464295 | no |
| FAM187B      | -0.030457925 | -0.547650033 | 0.584310455 | 0.742471234 | no |
| RAD50        | -0.030454828 | -0.547594287 | 0.584348695 | 0.742475926 | no |
| SH3RF3-AS1   | -0.030443306 | -0.547386921 | 0.584490955 | 0.742595913 | no |
| EARS2        | -0.030441582 | -0.547355902 | 0.584512236 | 0.742595913 | no |
| DNAL1        | -0.030436661 | -0.547267333 | 0.584573003 | 0.742629214 | no |
| KLHL7-AS1    | -0.030426957 | -0.547092693 | 0.584692832 | 0.742721986 | no |
| ST6GALNAC5   | -0.03042515  | -0.547060169 | 0.58471515  | 0.742721986 | no |
| PTDSS2       | -0.030411447 | -0.546813556 | 0.584884385 | 0.742893045 | no |
| ZC3H7A       | 0.030407048  | 0.546734387  | 0.584938719 | 0.742896315 | no |
| PRCD         | -0.030405642 | -0.546709069 | 0.584956095 | 0.742896315 | no |
| C11orf54     | -0.030395107 | -0.546519475 | 0.585086225 | 0.742973454 | no |
| MIR5194      | 0.030393962  | 0.54649887   | 0.585100368 | 0.742973454 | no |
| ZFP91-CNTF   | -0.030392328 | -0.54646947  | 0.585120548 | 0.742973454 | no |
| NTF4         | 0.030386095  | 0.54635728   | 0.58519756  | 0.74302734  | no |
| METTL17      | -0.030373919 | -0.546138164 | 0.585347983 | 0.743174425 | no |
| INPP5F       | -0.030358797 | -0.545866005 | 0.585534845 | 0.743367755 | no |
| MED7         | 0.03035096   | 0.545724956  | 0.585631699 | 0.743446798 | no |
| LOC441155    | -0.030335673 | -0.545449831 | 0.58582064  | 0.743642727 | no |
| COPS8        | -0.030318212 | -0.545135586 | 0.586036481 | 0.743869748 | no |

|              |              |              |             |             |    |
|--------------|--------------|--------------|-------------|-------------|----|
| DDX10        | -0.030315605 | -0.545088673 | 0.586068706 | 0.743869748 | no |
| FILIP1       | 0.030311945  | 0.545022797  | 0.58611396  | 0.743876684 | no |
| ACSL4        | -0.030309563 | -0.544979945 | 0.586143398 | 0.743876684 | no |
| N6AMT2       | 0.030301728  | 0.544838926  | 0.586240278 | 0.743955702 | no |
| PIEZO2       | 0.030293884  | 0.544697764  | 0.586337264 | 0.744034845 | no |
| RASD1        | 0.030288764  | 0.54460561   | 0.586400582 | 0.744043387 | no |
| EDN3         | -0.03028774  | -0.544587193 | 0.586413237 | 0.744043387 | no |
| EGFR-AS1     | -0.030273106 | -0.544323829 | 0.586594213 | 0.744229071 | no |
| ZNF701       | 0.030254417  | 0.543987482  | 0.586825379 | 0.744478408 | no |
| C7orf34      | -0.030242524 | -0.543773435 | 0.586972512 | 0.744621112 | no |
| NRSN2        | -0.030236972 | -0.543673521 | 0.587041198 | 0.744629529 | no |
| LINC00162    | 0.030236335  | 0.54366206   | 0.587049077 | 0.744629529 | no |
| F2           | -0.030229339 | -0.543536154 | 0.587135636 | 0.744629529 | no |
| PGM5-AS1     | -0.030228327 | -0.543517947 | 0.587148154 | 0.744629529 | no |
| SHH          | -0.030226266 | -0.543480849 | 0.58717366  | 0.744629529 | no |
| SEC14L3      | 0.030225185  | 0.543461391  | 0.587187038 | 0.744629529 | no |
| LOC100128338 | 0.030220074  | 0.543369411  | 0.58725028  | 0.744665787 | no |
| IFNB1        | 0.030210638  | 0.543199588  | 0.587367051 | 0.744769916 | no |
| LOC283693    | -0.030178851 | -0.542627532 | 0.587760482 | 0.745224809 | no |
| ROMO1        | -0.030164908 | -0.542376601 | 0.587933099 | 0.745399695 | no |
| MIR1256      | 0.030125998  | 0.541676346  | 0.58841493  | 0.745966568 | no |
| SUZ12        | -0.030120924 | -0.541585036 | 0.588477773 | 0.74600223  | no |
| C12orf40     | -0.030117885 | -0.541530343 | 0.588515415 | 0.746005945 | no |
| EMC6         | 0.030114414  | 0.541467865  | 0.588558417 | 0.746016452 | no |
| ZCCHC13      | -0.030102383 | -0.541251346 | 0.588707454 | 0.746161352 | no |
| FGFR10P2     | 0.030093956  | 0.541099705  | 0.588811843 | 0.746221436 | no |
| UBAC2-AS1    | -0.030088082 | -0.540993985 | 0.588884626 | 0.746221436 | no |
| PRR23B       | -0.030087926 | -0.54099118  | 0.588886557 | 0.746221436 | no |
| MRPS18C      | -0.030087346 | -0.540980734 | 0.588893749 | 0.746221436 | no |
| KLF7         | -0.030081185 | -0.540869866 | 0.588970081 | 0.746236676 | no |
| TSNAXIP1     | -0.03008077  | -0.540862398 | 0.588975222 | 0.746236676 | no |
| FAM89A       | 0.03005994   | 0.540487523  | 0.589233356 | 0.746491632 | no |
| ITLN2        | -0.030058926 | -0.54046928  | 0.589245919 | 0.746491632 | no |
| ST8SIA6-AS1  | 0.03004772   | 0.540267611  | 0.589384808 | 0.746623572 | no |
| PLA2G2F      | 0.030038275  | 0.540097636  | 0.589501881 | 0.746727863 | no |
| KCTD20       | -0.030032627 | -0.539995983 | 0.589571902 | 0.746772543 | no |
| REG1B        | -0.030024419 | -0.539848266 | 0.589673659 | 0.746814185 | no |
| ADGB         | 0.030022338  | 0.539810809  | 0.589699463 | 0.746814185 | no |
| SIGMAR1      | 0.030021566  | 0.539796926  | 0.589709028 | 0.746814185 | no |
| TSSK3        | -0.030012682 | -0.539637044 | 0.589819177 | 0.746909666 | no |
| OPA1-AS1     | -0.030007307 | -0.539540312 | 0.589885824 | 0.746943737 | no |
| SLC7A13      | -0.030001822 | -0.539441593 | 0.589953845 | 0.746943737 | no |
| MYO3B        | 0.030001124  | 0.539429035  | 0.589962498 | 0.746943737 | no |
| TEFM         | 0.0299993    | 0.539396223  | 0.589985107 | 0.746943737 | no |
| PTMS         | -0.029976811 | -0.53899149  | 0.590264023 | 0.747239314 | no |
| SEMA4F       | 0.029974869  | 0.538956538  | 0.590288113 | 0.747239314 | no |
| ABCG5        | -0.029971319 | -0.538892647 | 0.590332149 | 0.747251043 | no |
| RNF31        | 0.02996667   | 0.538808992  | 0.59038981  | 0.747280016 | no |
| CDC37        | 0.02995453   | 0.538590512  | 0.590540412 | 0.74742662  | no |
| 41153        | -0.029943708 | -0.538395759 | 0.590674675 | 0.747552525 | no |
| FUT6         | -0.02993779  | -0.538289253 | 0.590748106 | 0.747599241 | no |

|              |              |              |             |             |    |
|--------------|--------------|--------------|-------------|-------------|----|
| KCNG1        | -0.029935126 | -0.538241313 | 0.59078116  | 0.747599241 | no |
| WDSUB1       | -0.029926702 | -0.538089713 | 0.590885691 | 0.747655112 | no |
| SOCS2-AS1    | 0.029924909  | 0.538057437  | 0.590907947 | 0.747655112 | no |
| PCSK1        | 0.029920159  | 0.537971957  | 0.590966892 | 0.747655112 | no |
| KISS1        | -0.02991802  | -0.537933462 | 0.590993438 | 0.747655112 | no |
| TAX1BP1      | -0.029917551 | -0.537925023 | 0.590999258 | 0.747655112 | no |
| ASAP2        | -0.029891131 | -0.537449563 | 0.591327181 | 0.748025926 | no |
| TRIM49C      | -0.029885295 | -0.537344543 | 0.591399624 | 0.748047522 | no |
| ARHGEF16     | 0.029884148  | 0.537323894  | 0.591413869 | 0.748047522 | no |
| CEP120       | 0.029876242  | 0.537181611  | 0.591512024 | 0.748090446 | no |
| AK7          | 0.029875807  | 0.537173785  | 0.591517423 | 0.748090446 | no |
| PSMA1        | 0.029871771  | 0.537101152  | 0.591567533 | 0.748100163 | no |
| HHAT         | -0.029868385 | -0.537040209 | 0.591609579 | 0.748100163 | no |
| DPYD-AS1     | -0.029866777 | -0.537011283 | 0.591629537 | 0.748100163 | no |
| OR10T2       | -0.029862556 | -0.536935314 | 0.591681952 | 0.748120214 | no |
| CDK11B       | -0.029858743 | -0.536866693 | 0.5917293   | 0.748120214 | no |
| C17orf97     | -0.02985709  | -0.536836945 | 0.591749826 | 0.748120214 | no |
| INO80B       | 0.029850981  | 0.536727003  | 0.59182569  | 0.748167577 | no |
| SPACA3       | 0.029848466  | 0.536681752  | 0.591856916 | 0.748167577 | no |
| NINJ2        | 0.029835504  | 0.536448484  | 0.592017898 | 0.748327058 | no |
| LILRP2       | 0.029830817  | 0.536364135  | 0.592076113 | 0.748356628 | no |
| SNORD9       | -0.029825376 | -0.536266212 | 0.5921437   | 0.748398039 | no |
| HSPA1A       | 0.02982027   | 0.536174322  | 0.592207127 | 0.748434188 | no |
| RNF148       | 0.029803127  | 0.535865814  | 0.592420095 | 0.748588531 | no |
| CENPI        | 0.029802657  | 0.535857359  | 0.592425932 | 0.748588531 | no |
| LINC00536    | -0.029802028 | -0.535846034 | 0.59243375  | 0.748588531 | no |
| KCNK2        | -0.02979057  | -0.535639844 | 0.592576108 | 0.74872439  | no |
| SLC10A2      | -0.029785618 | -0.535550723 | 0.592637644 | 0.748758119 | no |
| UQCRBP1      | -0.029772455 | -0.535313835 | 0.592801223 | 0.748920762 | no |
| TMC5         | -0.0297495   | -0.534900735 | 0.593086533 | 0.749237167 | no |
| UBE2W        | -0.02972586  | -0.534475322 | 0.593380412 | 0.749564359 | no |
| LOC146481    | -0.029720287 | -0.534375014 | 0.593449716 | 0.749607843 | no |
| SSBP1        | -0.029713092 | -0.534245548 | 0.59353917  | 0.749676774 | no |
| SNORA74A     | 0.029702569  | 0.534056168  | 0.593670034 | 0.749797996 | no |
| RNF183       | -0.029690326 | -0.533835851 | 0.593822292 | 0.749946222 | no |
| CABIN1       | -0.029661304 | -0.533313556 | 0.594183313 | 0.750358067 | no |
| GRAMD4       | 0.029650052  | 0.533111078  | 0.594323298 | 0.750471179 | no |
| CLCN7        | -0.029648491 | -0.533082982 | 0.594342723 | 0.750471179 | no |
| LOC100129722 | -0.029637661 | -0.532888092 | 0.594477478 | 0.750597232 | no |
| BAGE4        | 0.029617819  | 0.532531021  | 0.594724408 | 0.750849115 | no |
| SET          | -0.029611275 | -0.532413245 | 0.594805865 | 0.750849115 | no |
| GLYAT        | 0.029610785  | 0.532404423  | 0.594811966 | 0.750849115 | no |
| ZBTB32       | 0.029610403  | 0.532397547  | 0.594816722 | 0.750849115 | no |
| RCN2         | -0.029588128 | -0.531996706 | 0.595093997 | 0.751155003 | no |
| RAD9A        | -0.029585317 | -0.531946118 | 0.595128994 | 0.751155006 | no |
| ZBED3-AS1    | -0.02957606  | -0.531779522 | 0.595244254 | 0.751256417 | no |
| OSBPL8       | -0.029565042 | -0.531581249 | 0.595381443 | 0.751385436 | no |
| LGALS9B      | 0.029544999  | 0.531220564  | 0.595631046 | 0.751656302 | no |
| GSPT1        | 0.029541899  | 0.531164769  | 0.595669662 | 0.751660895 | no |
| RPS5         | -0.029532431 | -0.530994378 | 0.595787597 | 0.751730142 | no |
| HPYR1        | -0.029531877 | -0.530984411 | 0.595794496 | 0.751730142 | no |

|              |              |              |             |             |    |
|--------------|--------------|--------------|-------------|-------------|----|
| CHTF8        | -0.029524031 | -0.530843224 | 0.595892226 | 0.751809313 | no |
| C1orf68      | -0.029518704 | -0.530747352 | 0.595958593 | 0.751818719 | no |
| C14orf101    | 0.0295167    | 0.5307113    | 0.595983551 | 0.751818719 | no |
| LOC100128770 | 0.029515008  | 0.53068085   | 0.596004631 | 0.751818719 | no |
| MFAP4        | 0.029507109  | 0.5305387    | 0.596103044 | 0.751898727 | no |
| RCC2         | -0.029496134 | -0.530341195 | 0.596239792 | 0.752027077 | no |
| ANHX         | -0.029488121 | -0.530197002 | 0.596339637 | 0.752108869 | no |
| EIF4G1       | -0.029482314 | -0.530092489 | 0.596412011 | 0.752156008 | no |
| CCL4L2       | 0.029479124  | 0.530035097  | 0.596451756 | 0.752161993 | no |
| CDKN1C       | -0.029473654 | -0.529936647 | 0.596519937 | 0.752203835 | no |
| MUC22        | -0.029470141 | -0.529873431 | 0.596563719 | 0.752214907 | no |
| DENND4A      | -0.02945283  | -0.529561917 | 0.596779487 | 0.752442826 | no |
| ABHD13       | -0.029430892 | -0.529167123 | 0.59705299  | 0.752738669 | no |
| GEMIN8P4     | -0.02942839  | -0.529122108 | 0.597084179 | 0.752738669 | no |
| LOC100131564 | 0.029412916  | 0.528843632  | 0.597277139 | 0.752937763 | no |
| PCSK9        | -0.029393212 | -0.528489045 | 0.597522879 | 0.753160696 | no |
| ARF5         | -0.029393116 | -0.52848732  | 0.597524074 | 0.753160696 | no |
| REG3A        | -0.029388535 | -0.528404893 | 0.597581205 | 0.753188533 | no |
| KIAA1407     | 0.029380642  | 0.528262854  | 0.597679659 | 0.753268447 | no |
| LINC00301    | -0.029375449 | -0.528169402 | 0.59774444  | 0.753305915 | no |
| ERVV-2       | 0.029371182  | 0.528092605  | 0.597797678 | 0.753328832 | no |
| ACE2         | -0.029347164 | -0.527660396 | 0.598097337 | 0.753662262 | no |
| PDE11A       | -0.029340351 | -0.527537791 | 0.598182354 | 0.753725198 | no |
| ARL2         | 0.029322101  | 0.527209383  | 0.598410107 | 0.753967967 | no |
| KRT23        | -0.029302714 | -0.526860497 | 0.598652104 | 0.754207924 | no |
| S1PR5        | -0.029301221 | -0.526833626 | 0.598670744 | 0.754207924 | no |
| SNORA62      | -0.02929285  | -0.526682993 | 0.598775243 | 0.754295355 | no |
| POLR2G       | 0.029275183  | 0.526365064  | 0.598995827 | 0.754529003 | no |
| HNRNPAB      | -0.029261916 | -0.526126335 | 0.599161485 | 0.754685286 | no |
| OR2AT4       | -0.029259623 | -0.526085062 | 0.599190128 | 0.754685286 | no |
| NCR2         | -0.029240741 | -0.525745285 | 0.599425946 | 0.754938058 | no |
| MORF4L2      | 0.029232484  | 0.525596683  | 0.599529095 | 0.75502372  | no |
| AFM          | 0.029214223  | 0.525268078  | 0.599757218 | 0.755266751 | no |
| LRWD1        | 0.02921074   | 0.525205401  | 0.599800733 | 0.755277293 | no |
| OR5AU1       | -0.029205878 | -0.525117912 | 0.599861478 | 0.755309528 | no |
| LINC00348    | -0.029199287 | -0.5249993   | 0.599943837 | 0.755368973 | no |
| OR1M1        | -0.029180531 | -0.52466178  | 0.600178222 | 0.75561049  | no |
| PAK1IP1      | 0.02917831   | 0.524621815  | 0.600205978 | 0.75561049  | no |
| ANKAR        | -0.029168416 | -0.524443766 | 0.600329641 | 0.755659752 | no |
| LCE2B        | -0.029167814 | -0.524432936 | 0.600337163 | 0.755659752 | no |
| CDHR5        | -0.029165196 | -0.52438582  | 0.60036989  | 0.755659752 | no |
| GHRLOS       | -0.029163926 | -0.524362979 | 0.600385755 | 0.755659752 | no |
| VIPAS39      | -0.029151864 | -0.524145923 | 0.600536532 | 0.75580526  | no |
| TTC36        | -0.029147481 | -0.524067048 | 0.600591327 | 0.755829959 | no |
| ATG12        | 0.029137933  | 0.52389523   | 0.600710697 | 0.755935916 | no |
| CER1         | -0.02912975  | -0.523747966 | 0.600813016 | 0.756020407 | no |
| UGT2A2       | -0.029117376 | -0.523525297 | 0.600967742 | 0.756170829 | no |
| DAZL         | 0.02910801   | 0.523356764  | 0.601084863 | 0.756253338 | no |
| AKAP8        | -0.029106504 | -0.523329665 | 0.601103696 | 0.756253338 | no |
| PDPK1        | -0.029102875 | -0.523264353 | 0.601149087 | 0.75626295  | no |
| MIR205HG     | 0.029100266  | 0.523217408  | 0.601181715 | 0.75626295  | no |



|              |              |              |             |             |    |
|--------------|--------------|--------------|-------------|-------------|----|
| PCDH9-AS3    | 0.029094862  | 0.523120161  | 0.601249306 | 0.756267308 | no |
| WDR19        | 0.029094362  | 0.523111164  | 0.601255559 | 0.756267308 | no |
| STX5         | 0.029085415  | 0.522950158  | 0.601367473 | 0.756363806 | no |
| OR8U8        | -0.029075404 | -0.522770006 | 0.601492706 | 0.756447992 | no |
| ACSM1        | 0.029074437  | 0.522752605  | 0.601504803 | 0.756447992 | no |
| OR2M2        | -0.029071569 | -0.522701005 | 0.601540676 | 0.75644884  | no |
| IL33         | 0.02906547   | 0.522591245  | 0.601616985 | 0.756500533 | no |
| OR5M3        | -0.029043301 | -0.522192319 | 0.601894368 | 0.756805047 | no |
| OR2AK2       | -0.029026914 | -0.521897437 | 0.602099444 | 0.757018613 | no |
| DEFB4A       | -0.029018659 | -0.521748892 | 0.602202761 | 0.757056547 | no |
| KRTAP9-3     | -0.029016715 | -0.521713908 | 0.602227095 | 0.757056547 | no |
| ASMTL-AS1    | 0.02901606   | 0.521702119  | 0.602235295 | 0.757056547 | no |
| WDR67        | -0.029012897 | -0.521645197 | 0.602274889 | 0.757062037 | no |
| MAVS         | 0.029005374  | 0.521509834  | 0.602369051 | 0.757130395 | no |
| HM13-AS1     | -0.029002924 | -0.521465731 | 0.602399731 | 0.757130395 | no |
| BLOC1S6      | -0.028994938 | -0.521322041 | 0.602499695 | 0.757211751 | no |
| CDC25B       | -0.028991471 | -0.521259649 | 0.602543102 | 0.757222022 | no |
| PPTC7        | -0.028984978 | -0.52114281  | 0.602624394 | 0.7572799   | no |
| IRX5         | -0.028971066 | -0.520892457 | 0.602798595 | 0.757443224 | no |
| FMR1-AS1     | -0.028968969 | -0.520854725 | 0.602824852 | 0.757443224 | no |
| SLC22A3      | -0.028955368 | -0.520609982 | 0.602995176 | 0.757612939 | no |
| COPS6        | -0.028930564 | -0.520163632 | 0.603305859 | 0.757958975 | no |
| OR2S2        | -0.028922124 | -0.520011755 | 0.60341159  | 0.758047494 | no |
| PBX4         | -0.028917038 | -0.519920234 | 0.603475307 | 0.758070091 | no |
| OR2L8        | -0.028914682 | -0.519877842 | 0.603504822 | 0.758070091 | no |
| FRMD8P1      | -0.028912242 | -0.519833925 | 0.603535399 | 0.758070091 | no |
| TBCA         | -0.0288951   | -0.519525465 | 0.603750183 | 0.758295552 | no |
| PPAP2C       | 0.028890734  | 0.519446901  | 0.603804894 | 0.758319949 | no |
| DCST1        | -0.028869129 | -0.519058129 | 0.604075659 | 0.758615672 | no |
| MRGPRG-AS1   | -0.028866163 | -0.519004746 | 0.604112843 | 0.758618039 | no |
| FOXB1        | 0.028860494  | 0.518902736  | 0.604183901 | 0.75866294  | no |
| PDCD6IP      | 0.028847369  | 0.518666565  | 0.604348426 | 0.758798486 | no |
| CTAGE6P      | 0.028846249  | 0.518646416  | 0.604362463 | 0.758798486 | no |
| MEF2C        | 0.028826709  | 0.518294786  | 0.60460746  | 0.759061744 | no |
| CCT6B        | 0.028813665  | 0.518060079  | 0.604771017 | 0.759222731 | no |
| PLCZ1        | -0.028802765 | -0.51786393  | 0.60490772  | 0.759349989 | no |
| CCDC175      | 0.028791345  | 0.51765843   | 0.605050954 | 0.759453299 | no |
| IFNL3        | -0.028788568 | -0.517608468 | 0.60508578  | 0.759453299 | no |
| SRD5A1       | -0.028787612 | -0.517591258 | 0.605097776 | 0.759453299 | no |
| LDLRAD3      | -0.028784934 | -0.517543065 | 0.605131371 | 0.759453299 | no |
| BLOC1S4      | 0.028778034  | 0.517418906  | 0.605217923 | 0.759507975 | no |
| COL7A1       | 0.028775826  | 0.517379178  | 0.605245618 | 0.759507975 | no |
| SYNPR-AS1    | -0.028766973 | -0.517219877 | 0.605356679 | 0.75959765  | no |
| SYNJ2BP-COX1 | -0.02876185  | -0.51712768  | 0.60542096  | 0.75959765  | no |
| ZFAT         | -0.028761678 | -0.517124591 | 0.605423114 | 0.75959765  | no |
| IHH          | -0.028742477 | -0.516779083 | 0.605664036 | 0.759855563 | no |
| CEACAM16     | -0.028737484 | -0.516689236 | 0.605726693 | 0.759889811 | no |
| PAXBP1       | -0.028730772 | -0.51656845  | 0.605810931 | 0.759951127 | no |
| BMP5         | 0.028727904  | 0.516516845  | 0.605846922 | 0.759951918 | no |
| DCHS1        | -0.028718041 | -0.516339369 | 0.60597071  | 0.760046819 | no |
| MBD3L1       | -0.028716241 | -0.516306967 | 0.605993311 | 0.760046819 | no |

|              |              |              |             |             |    |
|--------------|--------------|--------------|-------------|-------------|----|
| KCNJ18       | -0.028700231 | -0.516018873 | 0.60619428  | 0.760254509 | no |
| PLA2G12B     | -0.028688868 | -0.515814416 | 0.606336923 | 0.760354547 | no |
| UBE2V1       | 0.02868824   | 0.515803118  | 0.606344806 | 0.760354547 | no |
| RNA45S5      | -0.028674116 | -0.515548959 | 0.606522148 | 0.760532556 | no |
| ADORA2A-AS1  | -0.028664989 | -0.515384729 | 0.606636753 | 0.760554351 | no |
| PDZD3        | -0.028663886 | -0.515364867 | 0.606650614 | 0.760554351 | no |
| SKP1P2       | -0.028660126 | -0.515297212 | 0.606697829 | 0.760554351 | no |
| FAM133B      | 0.02865902   | 0.51527732   | 0.606711712 | 0.760554351 | no |
| ZNF75A       | -0.028658085 | -0.515260489 | 0.606723458 | 0.760554351 | no |
| ATAD3C       | 0.028655823  | 0.515219785  | 0.606751866 | 0.760554351 | no |
| S100A2       | 0.028651012  | 0.515133219  | 0.606812284 | 0.760585722 | no |
| LOC541473    | 0.028640949  | 0.51495213   | 0.606938682 | 0.760699785 | no |
| TBRG1        | -0.028627853 | -0.514716478 | 0.607103181 | 0.760861585 | no |
| BRAT1        | 0.028622712  | 0.514623978  | 0.607167757 | 0.760898144 | no |
| AURKAIP1     | 0.028616996  | 0.514521126  | 0.607239564 | 0.760943759 | no |
| NDUFB2-AS1   | 0.028607147  | 0.514343895  | 0.607363308 | 0.761054448 | no |
| ABHD11       | 0.028600749  | 0.514228769  | 0.607443696 | 0.761110801 | no |
| FGF14-AS2    | -0.028580635 | -0.513866822 | 0.607696459 | 0.761380987 | no |
| IGSF23       | -0.028577951 | -0.513818529 | 0.607730187 | 0.761380987 | no |
| RPL12        | 0.028573719  | 0.513742381  | 0.607783373 | 0.761403233 | no |
| MIR34A       | -0.02857028  | -0.513680507 | 0.607826589 | 0.761412989 | no |
| LRIT2        | -0.028562483 | -0.513540192 | 0.6079246   | 0.761450416 | no |
| LOC401980    | -0.028562265 | -0.513536284 | 0.60792733  | 0.761450416 | no |
| CYP4F30P     | -0.02855837  | -0.513466184 | 0.607976298 | 0.761451022 | no |
| SRRM5        | -0.028552371 | -0.513358246 | 0.6080517   | 0.761451022 | no |
| OR2B3        | 0.028551643  | 0.513345137  | 0.608060858 | 0.761451022 | no |
| COCH         | -0.028550952 | -0.513332712 | 0.608069538 | 0.761451022 | no |
| STMND1       | 0.028546003  | 0.513243653  | 0.608131756 | 0.761484564 | no |
| KRTAP1-3     | -0.02852122  | -0.512797702 | 0.608443348 | 0.761830342 | no |
| TTY6         | 0.02850134   | 0.512439975  | 0.608693349 | 0.762078235 | no |
| HBS1L        | -0.028499837 | -0.51241293  | 0.608712251 | 0.762078235 | no |
| PKN3         | -0.028493516 | -0.512299188 | 0.608791752 | 0.762117615 | no |
| MYL5         | 0.028490599  | 0.51224671   | 0.608828433 | 0.762117615 | no |
| CBX5         | -0.028488086 | -0.51220149  | 0.608860041 | 0.762117615 | no |
| C4orf17      | -0.028483785 | -0.512124095 | 0.608914142 | 0.762117615 | no |
| TCL1B        | -0.028483238 | -0.51211426  | 0.608921017 | 0.762117615 | no |
| GPR88        | -0.028461863 | -0.511729623 | 0.60918992  | 0.762342013 | no |
| ARHGAP6      | 0.028459313  | 0.511683751  | 0.609221993 | 0.762342013 | no |
| BAG2         | 0.028458962  | 0.511677423  | 0.609226418 | 0.762342013 | no |
| LOC340074    | -0.028456461 | -0.511632424 | 0.609257881 | 0.762342013 | no |
| SPACA5       | -0.028454888 | -0.511604122 | 0.60927767  | 0.762342013 | no |
| SBSN         | -0.02844709  | -0.511463798 | 0.609375791 | 0.762382934 | no |
| LOC221122    | -0.02844665  | -0.511455886 | 0.609381324 | 0.762382934 | no |
| LOC100859930 | 0.02844076   | 0.511349899  | 0.60945544  | 0.762431275 | no |
| FAHD2CP      | -0.028431745 | -0.511187689 | 0.609568881 | 0.762488285 | no |
| C21orf119    | -0.0284315   | -0.51118327  | 0.609571971 | 0.762488285 | no |
| CYP7B1       | 0.028426118  | 0.511086431  | 0.609639699 | 0.762528621 | no |
| BIN1         | 0.028422187  | 0.5110157    | 0.60968917  | 0.762534546 | no |
| TXNL4B       | 0.028420103  | 0.5109782    | 0.609715399 | 0.762534546 | no |
| GHR          | -0.02841434  | -0.5108745   | 0.609787934 | 0.762577713 | no |
| LGI1         | -0.028411722 | -0.510827397 | 0.609820882 | 0.762577713 | no |

|            |              |              |             |             |    |
|------------|--------------|--------------|-------------|-------------|----|
| CASP14     | -0.028403357 | -0.510676875 | 0.609926176 | 0.762590164 | no |
| ZNF142     | -0.028400185 | -0.510619792 | 0.609966109 | 0.762590164 | no |
| FAM83A     | -0.028397574 | -0.510572807 | 0.609998979 | 0.762590164 | no |
| R3HDML     | -0.028395485 | -0.510535222 | 0.610025274 | 0.762590164 | no |
| LBH        | 0.028394043  | 0.510509278  | 0.610043424 | 0.762590164 | no |
| CDC42EP1   | -0.028393627 | -0.510501793 | 0.610048661 | 0.762590164 | no |
| THOC5      | -0.028391199 | -0.510458102 | 0.610079228 | 0.762590164 | no |
| PGM3       | 0.028376684  | 0.510196913  | 0.610261976 | 0.762774231 | no |
| ABCA4      | 0.028363224  | 0.509954728  | 0.610431451 | 0.762941687 | no |
| CTU1       | -0.028352959 | -0.509770019 | 0.610560718 | 0.763058874 | no |
| EIF5AL1    | -0.02834993  | -0.509715501 | 0.610598875 | 0.763062187 | no |
| SUPT20HL2  | -0.028332025 | -0.509393322 | 0.610824386 | 0.76329962  | no |
| GOLGA8CP   | -0.028328962 | -0.50933821  | 0.610862965 | 0.763303447 | no |
| KIF11      | -0.02831916  | -0.509161843 | 0.610986434 | 0.76341334  | no |
| GGT6       | -0.028291099 | -0.508656905 | 0.611339985 | 0.763810686 | no |
| KRTAP13-4  | -0.02828545  | -0.508555261 | 0.611411166 | 0.763855212 | no |
| KIF23      | -0.028279686 | -0.508451555 | 0.611483794 | 0.763901542 | no |
| ACAA1      | 0.028269508  | 0.508268416  | 0.611612061 | 0.764005428 | no |
| MED17      | -0.028267446 | -0.508231308 | 0.611638053 | 0.764005428 | no |
| IL3        | -0.02825607  | -0.508026608 | 0.611781438 | 0.764128496 | no |
| RPL41      | -0.028253987 | -0.507989134 | 0.611807689 | 0.764128496 | no |
| BDKRB1     | 0.028247114  | 0.507865464  | 0.611894324 | 0.76419229  | no |
| C9orf84    | 0.028239331  | 0.507725408  | 0.611992445 | 0.764227461 | no |
| CCDC163P   | -0.028239239 | -0.50772375  | 0.611993606 | 0.764227461 | no |
| C1orf170   | 0.028232304  | 0.507598965  | 0.612081035 | 0.764292227 | no |
| SNORA65    | -0.028226747 | -0.507498988 | 0.612151086 | 0.764321084 | no |
| LINC00317  | -0.028224829 | -0.507464468 | 0.612175274 | 0.764321084 | no |
| ADRB3      | -0.028217159 | -0.507326446 | 0.612271989 | 0.764392079 | no |
| KANSL1-AS1 | -0.028214678 | -0.507281804 | 0.612303273 | 0.764392079 | no |
| LCE3C      | -0.028208557 | -0.507171665 | 0.612380457 | 0.76443263  | no |
| OR4D2      | -0.028205559 | -0.507117731 | 0.612418255 | 0.76443263  | no |
| ZNF705G    | -0.028203639 | -0.507083186 | 0.612442465 | 0.76443263  | no |
| SHCBP1L    | -0.028198817 | -0.506996422 | 0.612503274 | 0.76446413  | no |
| DNM3OS     | 0.028184064  | 0.506730956  | 0.612689343 | 0.764645698 | no |
| LOC200772  | -0.028181641 | -0.506687351 | 0.612719909 | 0.764645698 | no |
| JPH1       | -0.028174826 | -0.506564732 | 0.612805865 | 0.764658213 | no |
| C16orf3    | -0.028173026 | -0.506532341 | 0.612828572 | 0.764658213 | no |
| HCG9       | 0.028172383  | 0.506520777  | 0.612836679 | 0.764658213 | no |
| CABS1      | 0.028151477  | 0.506144599  | 0.613100419 | 0.76494288  | no |
| LOC93432   | 0.028130131  | 0.505760515  | 0.613369755 | 0.765164764 | no |
| OR51A4     | 0.028122719  | 0.50562713   | 0.613463301 | 0.765164764 | no |
| C4orf46    | -0.028117658 | -0.505536065 | 0.613527172 | 0.765164764 | no |
| LINC00273  | -0.028117358 | -0.505530679 | 0.613530949 | 0.765164764 | no |
| SDC3       | -0.028114065 | -0.505471426 | 0.61357251  | 0.765164764 | no |
| SERF1B     | -0.028112062 | -0.50543539  | 0.613597786 | 0.765164764 | no |
| ISX        | -0.028109864 | -0.505395829 | 0.613625535 | 0.765164764 | no |
| ACTL7B     | -0.028108604 | -0.505373163 | 0.613641434 | 0.765164764 | no |
| C11orf92   | -0.028108089 | -0.505363885 | 0.613647942 | 0.765164764 | no |
| CDKN2B     | 0.028106704  | 0.505338979  | 0.613665413 | 0.765164764 | no |
| SUN5       | 0.028106349  | 0.505332579  | 0.613669902 | 0.765164764 | no |
| METRN      | 0.028094197  | 0.505113931  | 0.613823283 | 0.765311608 | no |

|              |              |              |             |             |    |
|--------------|--------------|--------------|-------------|-------------|----|
| TINAG        | 0.028088557  | 0.505012435  | 0.613894489 | 0.765333501 | no |
| GMEB2        | -0.028087164 | -0.504987381 | 0.613912066 | 0.765333501 | no |
| BAGE2        | 0.028083581  | 0.504922903  | 0.613957303 | 0.765345499 | no |
| AP4S1        | -0.028076292 | -0.50479176  | 0.614049317 | 0.765415804 | no |
| LINC00261    | -0.028067261 | -0.50462926  | 0.61416334  | 0.765513534 | no |
| SLC23A1      | 0.028051202  | 0.504340304  | 0.614366118 | 0.765715168 | no |
| PRDM15       | -0.028048807 | -0.504297202 | 0.614396368 | 0.765715168 | no |
| LOC100129520 | -0.028033033 | -0.504013369 | 0.614595585 | 0.765919033 | no |
| IGFL4        | -0.02802557  | -0.503879084 | 0.614689847 | 0.765992085 | no |
| PCDHB13      | -0.028022737 | -0.503828116 | 0.614725625 | 0.765992255 | no |
| A2MP1        | -0.028012256 | -0.503639519 | 0.614858026 | 0.766112815 | no |
| GOLGA8DP     | 0.028006991  | 0.503544789  | 0.614924533 | 0.766151264 | no |
| CDK16        | 0.027991614  | 0.503268105  | 0.615118805 | 0.766344604 | no |
| NOB1         | 0.027989064  | 0.503222216  | 0.615151029 | 0.766344604 | no |
| LOC100506844 | -0.027983987 | -0.503130872 | 0.615215173 | 0.766345144 | no |
| DPYSL2       | -0.027983385 | -0.503120039 | 0.615222781 | 0.766345144 | no |
| CT45A2       | -0.027980096 | -0.503060855 | 0.615264343 | 0.766352498 | no |
| C6orf25      | -0.027954776 | -0.502605266 | 0.615584324 | 0.766706619 | no |
| POU1F1       | -0.027945303 | -0.502434816 | 0.615704058 | 0.766811307 | no |
| AMN          | 0.027942103  | 0.502377249  | 0.615744499 | 0.766817235 | no |
| DAPK2        | -0.027934342 | -0.502237601 | 0.615842606 | 0.766894974 | no |
| KRT37        | -0.027920549 | -0.501989409 | 0.616016986 | 0.767067678 | no |
| TRIM48       | 0.027909975  | 0.501799154  | 0.616150674 | 0.767109636 | no |
| KIAA1210     | 0.027909874  | 0.501797342  | 0.616151947 | 0.767109636 | no |
| C10orf12     | -0.027904947 | -0.501708676 | 0.616214256 | 0.767109636 | no |
| ING2         | 0.027904421  | 0.501699222  | 0.616220899 | 0.767109636 | no |
| RAE1         | -0.027903768 | -0.501687476 | 0.616229154 | 0.767109636 | no |
| RPL26        | -0.027871509 | -0.501107035 | 0.61663712  | 0.767573029 | no |
| OR2D3        | 0.027868423  | 0.501051494  | 0.616676163 | 0.76757717  | no |
| ABCB10       | 0.027860867  | 0.500915549  | 0.616771733 | 0.767649347 | no |
| TRAF4        | -0.027858191 | -0.500867391 | 0.61680559  | 0.767649347 | no |
| BPIFC        | -0.027847717 | -0.500678942 | 0.616938083 | 0.767769781 | no |
| PER4         | -0.027843865 | -0.500609619 | 0.616986826 | 0.76778598  | no |
| NSUN5P1      | 0.02783179   | 0.500392355  | 0.6171396   | 0.767931628 | no |
| B3GALNT1     | -0.027828432 | -0.500331946 | 0.617182081 | 0.767940024 | no |
| PADI6        | 0.027803129  | 0.49987665   | 0.617502295 | 0.768293974 | no |
| C20orf141    | -0.027797513 | -0.499775602 | 0.617573373 | 0.768337928 | no |
| DPY19L2P2    | -0.027790688 | -0.499652801 | 0.617659757 | 0.768400917 | no |
| ENGASE       | 0.027781873  | 0.499494192  | 0.617771339 | 0.768495244 | no |
| TTC22        | 0.027772472  | 0.499325051  | 0.617890338 | 0.768594744 | no |
| C21orf58     | -0.027769904 | -0.499278842 | 0.617922851 | 0.768594744 | no |
| TEN1         | 0.02776518   | 0.499193841  | 0.617982659 | 0.76862465  | no |
| ABCA12       | -0.027761787 | -0.499132783 | 0.618025622 | 0.768633602 | no |
| ALDH4A1      | -0.027750946 | -0.49893773  | 0.618162879 | 0.768716281 | no |
| PITX1        | 0.027750886  | 0.498936649  | 0.618163639 | 0.768716281 | no |
| ZHX1         | -0.027746274 | -0.498853675 | 0.618222031 | 0.768744412 | no |
| KIR2DL2      | -0.027740676 | -0.498752948 | 0.618292919 | 0.768788077 | no |
| SLC27A4      | -0.027730797 | -0.498575193 | 0.618418027 | 0.76889915  | no |
| C10orf131    | 0.027726013  | 0.498489115  | 0.618478614 | 0.768901016 | no |
| TMCO2        | 0.027725029  | 0.4984714    | 0.618491083 | 0.768901016 | no |
| KC6          | 0.027716244  | 0.498313334  | 0.618602348 | 0.768994855 | no |

|              |              |              |             |             |    |
|--------------|--------------|--------------|-------------|-------------|----|
| PCK1         | -0.027706827 | -0.498143902 | 0.618721624 | 0.769082194 | no |
| IL17F        | 0.027705047  | 0.498111864  | 0.618744178 | 0.769082194 | no |
| ACOT4        | 0.027699665  | 0.49801504   | 0.618812345 | 0.76912244  | no |
| IFI27L1      | -0.027692868 | -0.49789273  | 0.61889846  | 0.769184987 | no |
| TRIM16       | 0.027689829  | 0.497838051  | 0.618936959 | 0.769188353 | no |
| PRAMEF2      | -0.027673839 | -0.497550358 | 0.619139541 | 0.769395622 | no |
| GAS2         | 0.027660134  | 0.497303762  | 0.619313207 | 0.769566934 | no |
| GPR180       | 0.027657103  | 0.497249212  | 0.619351627 | 0.769570179 | no |
| MEG9         | -0.027644595 | -0.497024172 | 0.619510135 | 0.769722629 | no |
| SLC7A3       | -0.02763393  | -0.496832273 | 0.619645314 | 0.769846077 | no |
| SH3BP5-AS1   | 0.027622858  | 0.496633056  | 0.619785662 | 0.769975933 | no |
| MYO5B        | 0.027609152  | 0.496386448  | 0.619959415 | 0.770147272 | no |
| VN1R4        | -0.027604114 | -0.496295791 | 0.620023295 | 0.770168656 | no |
| PCYOX1       | 0.027602141  | 0.496260301  | 0.620048304 | 0.770168656 | no |
| MAP3K12      | 0.027593193  | 0.496099302  | 0.620161758 | 0.77026506  | no |
| CPA1         | -0.027567699 | -0.495640593 | 0.620485056 | 0.770608712 | no |
| PHKB         | -0.02756572  | -0.495604984 | 0.620510156 | 0.770608712 | no |
| TEDDM1       | -0.027546996 | -0.495268096 | 0.620747646 | 0.770785231 | no |
| COL21A1      | 0.027546571  | 0.495260441  | 0.620753042 | 0.770785231 | no |
| GSTM1        | 0.027546031  | 0.495250729  | 0.620759889 | 0.770785231 | no |
| MIR5196      | 0.027542374  | 0.495184934  | 0.620806277 | 0.770798295 | no |
| CLIP4        | -0.027537597 | -0.495098978 | 0.62086688  | 0.770829008 | no |
| C2orf49      | -0.027534386 | -0.495041205 | 0.620907615 | 0.77083505  | no |
| CTRL         | -0.027529395 | -0.494951407 | 0.620970932 | 0.770869125 | no |
| CRY1         | -0.027518959 | -0.494763638 | 0.621103338 | 0.770988958 | no |
| FREM1        | -0.027498994 | -0.494404407 | 0.621356685 | 0.771258896 | no |
| DUX4L4       | -0.027479247 | -0.494049106 | 0.621607305 | 0.771525417 | no |
| BAIAP3       | 0.027455727  | 0.493625918  | 0.621905869 | 0.77185141  | no |
| IL36G        | -0.027443014 | -0.493397194 | 0.622067262 | 0.771938074 | no |
| OR14A16      | 0.027441686  | 0.493373299  | 0.622084124 | 0.771938074 | no |
| TOP2A        | -0.027438695 | -0.493319471 | 0.622122109 | 0.771938074 | no |
| SLC9A7       | -0.027437889 | -0.493304972 | 0.622132341 | 0.771938074 | no |
| LOC100507331 | -0.02743556  | -0.493263069 | 0.622161912 | 0.771938074 | no |
| PPAP2B       | -0.027433253 | -0.493221552 | 0.622191211 | 0.771938074 | no |
| CCDC136      | -0.027412081 | -0.492840622 | 0.622460068 | 0.772187384 | no |
| CHRN1        | 0.02741177   | 0.492835024  | 0.622464019 | 0.772187384 | no |
| PRX          | -0.027406857 | -0.492746637 | 0.62252641  | 0.772220206 | no |
| STRADB       | -0.027399278 | -0.492610264 | 0.622622677 | 0.772221737 | no |
| LOC399753    | -0.027398753 | -0.492600827 | 0.622629339 | 0.772221737 | no |
| GTF2A1L      | 0.027398273  | 0.492592184  | 0.622635441 | 0.772221737 | no |
| AK4          | 0.027380676  | 0.492275571  | 0.622858969 | 0.772407391 | no |
| WDR3         | 0.027378634  | 0.492238828  | 0.622884912 | 0.772407391 | no |
| C3orf43      | -0.027378001 | -0.492227437 | 0.622892955 | 0.772407391 | no |
| ABCC13       | -0.027374746 | -0.492168883 | 0.622934299 | 0.772414091 | no |
| SERPINB8     | -0.027367395 | -0.492036606 | 0.623027702 | 0.772480814 | no |
| NOSTRIN      | -0.027364853 | -0.491990869 | 0.623059999 | 0.772480814 | no |
| LOC339622    | -0.027357027 | -0.491850067 | 0.62315943  | 0.772559522 | no |
| APOB         | 0.027347267  | 0.491674459  | 0.62328345  | 0.772667868 | no |
| C18orf56     | -0.027344491 | -0.491624507 | 0.62331873  | 0.772667868 | no |
| HAUS7        | 0.027341536  | 0.491571351  | 0.623356274 | 0.77266984  | no |
| SAP30BP      | -0.027322537 | -0.491229509 | 0.623597737 | 0.772924561 | no |

|              |              |              |             |             |    |
|--------------|--------------|--------------|-------------|-------------|----|
| NANOS1       | -0.027292436 | -0.490687925 | 0.623980373 | 0.773314087 | no |
| PLAC1        | -0.027290332 | -0.490650064 | 0.624007127 | 0.773314087 | no |
| AGPAT6       | 0.027289323  | 0.490631906  | 0.624019957 | 0.773314087 | no |
| CLDN3        | -0.027286207 | -0.490575849 | 0.624059569 | 0.773318584 | no |
| PRSS58       | -0.027278278 | -0.490433193 | 0.62416038  | 0.773398912 | no |
| SERTAD4      | -0.027274126 | -0.490358489 | 0.624213174 | 0.773419736 | no |
| ADAM33       | -0.027255401 | -0.490021578 | 0.624451296 | 0.773670172 | no |
| TBPL2        | -0.027248888 | -0.489904389 | 0.624534132 | 0.77368551  | no |
| CASP2        | -0.027247903 | -0.489886676 | 0.624546653 | 0.77368551  | no |
| C10orf91     | -0.027245936 | -0.489851275 | 0.624571677 | 0.77368551  | no |
| LALBA        | 0.027232623  | 0.489611746  | 0.62474101  | 0.773850665 | no |
| AHRR         | 0.027217381  | 0.48933752   | 0.624934896 | 0.77400289  | no |
| SNRPA        | -0.02721641  | -0.489320054 | 0.624947246 | 0.77400289  | no |
| TRPA1        | 0.027213075  | 0.48926005   | 0.624989674 | 0.77400289  | no |
| PBK          | -0.027210901 | -0.489220935 | 0.625017332 | 0.77400289  | no |
| CCHCR1       | -0.027207732 | -0.489163913 | 0.625057654 | 0.77400289  | no |
| DUOXA2       | -0.027205269 | -0.489119599 | 0.625088991 | 0.77400289  | no |
| ALS2CR8      | -0.027203146 | -0.489081392 | 0.625116009 | 0.77400289  | no |
| IL25         | -0.027200179 | -0.489028009 | 0.62515376  | 0.774005038 | no |
| SNORA61      | 0.027196222  | 0.488956811  | 0.625204111 | 0.774022786 | no |
| KRT9         | -0.02718629  | -0.488778121 | 0.625330488 | 0.774134649 | no |
| NSMCE2       | 0.02717237   | 0.488527677  | 0.62550763  | 0.774298445 | no |
| RETNLB       | -0.027167538 | -0.488440739 | 0.625569127 | 0.774298445 | no |
| PRSS55       | -0.0271674   | -0.488438254 | 0.625570885 | 0.774298445 | no |
| LOC728228    | 0.027155536  | 0.488224794  | 0.625721892 | 0.774401781 | no |
| FAM108A1     | -0.027154077 | -0.488198537 | 0.625740468 | 0.774401781 | no |
| LYG1         | -0.027152109 | -0.488163138 | 0.625765512 | 0.774401781 | no |
| KIFC3        | -0.027149517 | -0.488116501 | 0.625798508 | 0.774401781 | no |
| PTRHD1       | -0.027145558 | -0.488045263 | 0.625848909 | 0.774419559 | no |
| LOC100131655 | -0.027141513 | -0.487972486 | 0.625900402 | 0.774438686 | no |
| DDX11L1      | 0.027118301  | 0.487554856  | 0.626195925 | 0.774759737 | no |
| NFATC2IP     | -0.02711228  | -0.48744652  | 0.626272596 | 0.774809991 | no |
| FAM71D       | -0.027097063 | -0.487172737 | 0.626466374 | 0.775005114 | no |
| LRRC46       | 0.027093327  | 0.487105527  | 0.626513947 | 0.775019354 | no |
| SCGB3A2      | -0.027089427 | -0.487035364 | 0.626563613 | 0.775036181 | no |
| WASH5P       | -0.027078056 | -0.486830767 | 0.626708449 | 0.775113508 | no |
| INSR         | -0.027077845 | -0.48682698  | 0.62671113  | 0.775113508 | no |
| CARD18       | -0.027076024 | -0.486794213 | 0.626734327 | 0.775113508 | no |
| OR8S1        | -0.027060007 | -0.486506023 | 0.626938367 | 0.775321237 | no |
| NAT8         | -0.027051554 | -0.486353944 | 0.627046052 | 0.77535398  | no |
| P2RY12       | -0.027050323 | -0.48633179  | 0.62706174  | 0.77535398  | no |
| ANKRD30BL    | -0.027049433 | -0.486315777 | 0.627073078 | 0.77535398  | no |
| ELOVL3       | 0.027042719  | 0.486194985  | 0.627158617 | 0.775415132 | no |
| TMPO         | 0.027030146  | 0.485968776  | 0.627318818 | 0.775568586 | no |
| FAM107B      | 0.027018118  | 0.48575237   | 0.627472094 | 0.775713459 | no |
| SORL1        | -0.026997142 | -0.485374968 | 0.627739438 | 0.775961107 | no |
| DNMBP        | -0.026996735 | -0.485367642 | 0.627744628 | 0.775961107 | no |
| ZNF816-ZNF32 | -0.026988616 | -0.485221576 | 0.627848112 | 0.776044388 | no |
| NXPE2        | -0.026981697 | -0.485097092 | 0.627936312 | 0.776094869 | no |
| KIF4B        | -0.026979747 | -0.485061998 | 0.627961178 | 0.776094869 | no |
| GPR148       | -0.026972906 | -0.48493891  | 0.628048394 | 0.776145256 | no |

|              |              |              |             |             |    |
|--------------|--------------|--------------|-------------|-------------|----|
| RLN3         | -0.026969298 | -0.484874003 | 0.628094388 | 0.776145256 | no |
| VCX3B        | -0.02696805  | -0.484851559 | 0.628110293 | 0.776145256 | no |
| SULT2A1      | -0.026956316 | -0.484640443 | 0.628259903 | 0.776285492 | no |
| KCNK16       | -0.026948051 | -0.484491731 | 0.628365298 | 0.776371084 | no |
| SPERT        | -0.0269208   | -0.484001445 | 0.62871283  | 0.776755817 | no |
| C3orf20      | -0.026912515 | -0.483852376 | 0.628818512 | 0.776841724 | no |
| LOC729020    | -0.026880529 | -0.483276896 | 0.629226567 | 0.777301152 | no |
| RBM42        | 0.026863092  | 0.482963175  | 0.629449065 | 0.777531317 | no |
| PRLH         | 0.026856635  | 0.482847008  | 0.629531462 | 0.777588404 | no |
| PDGFRA       | -0.026852157 | -0.482766434 | 0.629588615 | 0.777614306 | no |
| GDPD2        | 0.026843838  | 0.482616764  | 0.629694786 | 0.777700745 | no |
| OR7G3        | -0.026840196 | -0.482551229 | 0.629741277 | 0.777713469 | no |
| RANBP3L      | -0.026832124 | -0.48240601  | 0.629844301 | 0.777796005 | no |
| GKN1         | 0.026820574  | 0.482198201  | 0.629991742 | 0.777933379 | no |
| ZNF143       | 0.026813967  | 0.48207934   | 0.630076081 | 0.777946705 | no |
| TMEM218      | -0.026813826 | -0.482076797 | 0.630077886 | 0.777946705 | no |
| GCM2         | -0.026811222 | -0.482029947 | 0.63011113  | 0.777946705 | no |
| FRG2C        | 0.026804406  | 0.48190731   | 0.630198155 | 0.778000742 | no |
| LOC100131726 | 0.026800884  | 0.481843954  | 0.630243116 | 0.778000742 | no |
| H2AFB2       | -0.026797682 | -0.481786336 | 0.630284006 | 0.778000742 | no |
| DPYSL3       | 0.026796452  | 0.481764218  | 0.630299703 | 0.778000742 | no |
| MED9         | -0.026793607 | -0.481713017 | 0.63033604  | 0.778000909 | no |
| NACAP1       | -0.026783847 | -0.481537433 | 0.630460658 | 0.778064195 | no |
| THSD1        | 0.026777157  | 0.481417058  | 0.630546098 | 0.778064195 | no |
| FABP1        | -0.026776913 | -0.481412671 | 0.630549212 | 0.778064195 | no |
| WFDC12       | 0.026771971  | 0.481323753  | 0.630612328 | 0.778064195 | no |
| RPA1         | 0.026770454  | 0.481296465  | 0.630631698 | 0.778064195 | no |
| ARL4A        | -0.026770214 | -0.481292149 | 0.630634762 | 0.778064195 | no |
| AKR1CL1      | -0.026769746 | -0.481283722 | 0.630640744 | 0.778064195 | no |
| KCMF1        | 0.026763357  | 0.481168775  | 0.630722341 | 0.778120198 | no |
| NRK          | 0.026757562  | 0.481064518  | 0.630796354 | 0.778166836 | no |
| SLC16A7      | -0.026753708 | -0.480995188 | 0.630845575 | 0.778182886 | no |
| C14orf105    | -0.026748356 | -0.480898884 | 0.630913947 | 0.778222559 | no |
| IGF2BP3      | -0.02674191  | -0.480782908 | 0.63099629  | 0.778279458 | no |
| SLC6A19      | -0.026734887 | -0.480656558 | 0.631086004 | 0.778345441 | no |
| FZD8         | -0.026729173 | -0.480553765 | 0.631158996 | 0.77836061  | no |
| DMRT1        | 0.026728051  | 0.480533571  | 0.631173336 | 0.77836061  | no |
| TRA2A        | 0.026725419  | 0.480486226  | 0.631206957 | 0.77836061  | no |
| KRT79        | -0.02671113  | -0.480229141 | 0.63138953  | 0.778514201 | no |
| SON          | 0.026710001  | 0.480208823  | 0.631403961 | 0.778514201 | no |
| CD8A         | -0.026706486 | -0.480145582 | 0.631448876 | 0.778524915 | no |
| S100A7L2     | -0.026698901 | -0.480009117 | 0.631545802 | 0.778599749 | no |
| NCAPD3       | -0.026690384 | -0.479855897 | 0.631654636 | 0.778689256 | no |
| CAPN7        | -0.02668364  | -0.479734553 | 0.631740834 | 0.778750847 | no |
| SLC29A3      | -0.026677074 | -0.479616415 | 0.63182476  | 0.778808072 | no |
| EIF5         | 0.02666985   | 0.479486446  | 0.631917096 | 0.778808072 | no |
| TEX13A       | -0.026669638 | -0.479482646 | 0.631919795 | 0.778808072 | no |
| PCDHB15      | -0.026668667 | -0.47946517  | 0.631932212 | 0.778808072 | no |
| RNU6-35      | 0.02666593   | 0.479296636  | 0.632051955 | 0.778910979 | no |
| USP19        | 0.02665108   | 0.479148762  | 0.632157028 | 0.778995797 | no |
| CYP8B1       | -0.026635953 | -0.478876595 | 0.632350438 | 0.779189454 | no |

|              |              |              |             |             |    |
|--------------|--------------|--------------|-------------|-------------|----|
| TAS2R42      | -0.02662767  | -0.47872758  | 0.632456342 | 0.77927527  | no |
| UBR1         | -0.026620353 | -0.478595941 | 0.632549905 | 0.779342805 | no |
| GSS          | 0.026617667  | 0.478547602  | 0.632584263 | 0.779342805 | no |
| GTSF1L       | -0.026610999 | -0.478427639 | 0.632669533 | 0.779342805 | no |
| ZNF367       | 0.026608041  | 0.478374425  | 0.63270736  | 0.779342805 | no |
| DUSP21       | -0.026607914 | -0.47837214  | 0.632708984 | 0.779342805 | no |
| DDX11L9      | -0.026604162 | -0.47830463  | 0.632756974 | 0.779342805 | no |
| CDC6         | 0.026603534  | 0.478293341  | 0.632764999 | 0.779342805 | no |
| DNM1P46      | 0.026597747  | 0.478189221  | 0.632839017 | 0.779344936 | no |
| HSCB         | 0.026597728  | 0.478188884  | 0.632839257 | 0.779344936 | no |
| CFC1         | 0.026586053  | 0.477978833  | 0.632988592 | 0.779466364 | no |
| MAFA         | -0.026584348 | -0.477948163 | 0.633010397 | 0.779466364 | no |
| LOC390660    | -0.026571698 | -0.477720571 | 0.633172222 | 0.779595417 | no |
| SRD5A3       | 0.026570484  | 0.477698729  | 0.633187753 | 0.779595417 | no |
| ECM1         | 0.026549136  | 0.477314656  | 0.633460883 | 0.779887021 | no |
| LOC100127983 | 0.026542673  | 0.477198379  | 0.633543583 | 0.779944157 | no |
| DKFZp434L192 | -0.026536393 | -0.477085392 | 0.633623946 | 0.779986184 | no |
| ASPM         | 0.026534333  | 0.47704833   | 0.633650309 | 0.779986184 | no |
| TTY1B        | 0.026526045  | 0.476899219  | 0.633756374 | 0.780028142 | no |
| ZBTB7A       | 0.026524626  | 0.476873693  | 0.633774533 | 0.780028142 | no |
| MAN1A2       | 0.026523161  | 0.476847336  | 0.633793282 | 0.780028142 | no |
| COL2A1       | -0.026515095 | -0.476702211 | 0.633896522 | 0.780085713 | no |
| RFX1         | 0.026513834  | 0.476679532  | 0.633912656 | 0.780085713 | no |
| ZNRF3-AS1    | -0.026508461 | -0.476582852 | 0.633981438 | 0.780125685 | no |
| ODF4         | -0.026502475 | -0.476475163 | 0.634058056 | 0.780175294 | no |
| SUMO4        | 0.026465185  | 0.475804275  | 0.634535464 | 0.780682284 | no |
| DOK7         | -0.026463546 | -0.475774792 | 0.634556448 | 0.780682284 | no |
| PROKR1       | -0.026461779 | -0.475743006 | 0.634579071 | 0.780682284 | no |
| CA5A         | 0.026453133  | 0.475587454  | 0.634689788 | 0.780747307 | no |
| PSAPL1       | -0.026451978 | -0.475566668 | 0.634704584 | 0.780747307 | no |
| ZNF469       | 0.026430709  | 0.475184017  | 0.634976979 | 0.781037675 | no |
| DEFB110      | 0.026427662  | 0.475129195  | 0.63501601  | 0.781040981 | no |
| FBX043       | 0.026424054  | 0.475064286  | 0.635062222 | 0.781053119 | no |
| FAM174B      | -0.026416283 | -0.474924479 | 0.635161764 | 0.781120929 | no |
| BCAS4        | -0.026414075 | -0.474884753 | 0.63519005  | 0.781120929 | no |
| KLRC4-KLRK1  | -0.026408964 | -0.474792804 | 0.635255522 | 0.781156744 | no |
| NUP54        | 0.026403627  | 0.474696781  | 0.635323898 | 0.781196126 | no |
| KRT38        | -0.026399898 | -0.4746297   | 0.635371666 | 0.781210165 | no |
| UFL1         | -0.026394082 | -0.47452505  | 0.635446191 | 0.781250717 | no |
| SNORA39      | -0.02639165  | -0.474481295 | 0.635477352 | 0.781250717 | no |
| HIST1H1A     | -0.026377805 | -0.474232214 | 0.63565475  | 0.781414607 | no |
| FAM47B       | -0.02637557  | -0.474192015 | 0.635683382 | 0.781414607 | no |
| CACNA1H      | 0.026364432  | 0.473991617  | 0.635826126 | 0.781506119 | no |
| UPP2         | -0.026364086 | -0.473985398 | 0.635830556 | 0.781506119 | no |
| CTNNBIP1     | 0.026357455  | 0.473866103  | 0.635915536 | 0.781565869 | no |
| ADCK5        | -0.026354464 | -0.473812291 | 0.635953872 | 0.781568288 | no |
| OR4C13       | 0.026347297  | 0.473683344  | 0.636045736 | 0.781636488 | no |
| IQGAP3       | 0.02633953   | 0.473543622  | 0.636145282 | 0.78166658  | no |
| LINC00649    | 0.026335888  | 0.473478098  | 0.636191968 | 0.78166658  | no |
| CRK          | 0.026331732  | 0.473403327  | 0.636245244 | 0.78166658  | no |
| ARIH1        | 0.026331561  | 0.473400238  | 0.636247445 | 0.78166658  | no |



|           |              |              |             |             |    |
|-----------|--------------|--------------|-------------|-------------|----|
| TCTEX1D2  | 0.026331029  | 0.473390682  | 0.636254254 | 0.78166658  | no |
| METTL11B  | 0.026328362  | 0.473342686  | 0.636288453 | 0.78166658  | no |
| ADRA2A    | -0.026322724 | -0.473241257 | 0.636360729 | 0.781710684 | no |
| CKMT2     | -0.02631752  | -0.473147633 | 0.636427445 | 0.781747955 | no |
| B3GNT3    | -0.026313948 | -0.473083376 | 0.636473236 | 0.78175952  | no |
| PPP1R2P3  | -0.026309463 | -0.473002689 | 0.636530739 | 0.781779727 | no |
| CLHC1     | 0.026306991  | 0.472958205  | 0.636562442 | 0.781779727 | no |
| SSX9      | -0.026282158 | -0.472511442 | 0.636880876 | 0.782126108 | no |
| OR5H14    | -0.026273474 | -0.47235521  | 0.636992247 | 0.782193133 | no |
| CRYBA1    | 0.026272227  | 0.472332768  | 0.637008246 | 0.782193133 | no |
| CYP4A22   | -0.026265373 | -0.472209472 | 0.637096146 | 0.782256372 | no |
| RAD54L    | -0.026261759 | -0.472144443 | 0.637142508 | 0.782268604 | no |
| CCR3      | -0.026257024 | -0.472059268 | 0.637203236 | 0.782285506 | no |
| TMEM135   | -0.02625501  | -0.472023026 | 0.637229076 | 0.782285506 | no |
| KDM5D     | -0.026246476 | -0.471869488 | 0.637338552 | 0.782338123 | no |
| DOCK10    | 0.026241879  | 0.471786786  | 0.637397524 | 0.782338123 | no |
| MYLPF     | -0.026240078 | -0.471754396 | 0.637420621 | 0.782338123 | no |
| TTY15     | -0.026236821 | -0.471695802 | 0.637462405 | 0.782338123 | no |
| L3MBTL2   | -0.026235746 | -0.471676458 | 0.637476199 | 0.782338123 | no |
| SOX17     | 0.026234643  | 0.471656608  | 0.637490354 | 0.782338123 | no |
| THAP3     | -0.026229092 | -0.471556742 | 0.637561573 | 0.782380846 | no |
| BFSP2     | -0.026213522 | -0.471276635 | 0.637761346 | 0.782581312 | no |
| LINC00347 | -0.026197154 | -0.47098215  | 0.637971403 | 0.782794371 | no |
| PIH1D1    | 0.026189334  | 0.470841472  | 0.638071759 | 0.782851488 | no |
| NEB       | -0.02618785  | -0.470814773 | 0.638090806 | 0.782851488 | no |
| HBG1      | 0.026181706  | 0.470704237  | 0.638169665 | 0.78288129  | no |
| PATE3     | -0.026180281 | -0.470678602 | 0.638187954 | 0.78288129  | no |
| MFSD11    | 0.026167069  | 0.470440898  | 0.638357555 | 0.783044646 | no |
| OSBPL1A   | -0.026159995 | -0.470313637 | 0.638448362 | 0.783111337 | no |
| DAPK3     | 0.026156688  | 0.47025415   | 0.638490811 | 0.783118709 | no |
| LOC388948 | 0.026148031  | 0.47009839   | 0.638601965 | 0.783210342 | no |
| COL6A6    | -0.026120035 | -0.469594725 | 0.638961447 | 0.783588801 | no |
| RLN1      | 0.02611832   | 0.469563873  | 0.638983469 | 0.783588801 | no |
| HAL       | 0.026106315  | 0.469347907  | 0.63913764  | 0.783691745 | no |
| CTAG2     | -0.026106104 | -0.469344113 | 0.639140348 | 0.783691745 | no |
| FOXD4L5   | -0.026100845 | -0.469249485 | 0.639207905 | 0.783729866 | no |
| AIMP2     | 0.026097574  | 0.469190651  | 0.639249909 | 0.783736653 | no |
| MANSC4    | 0.026084595  | 0.468957152  | 0.639416625 | 0.783896332 | no |
| GABARAPL3 | -0.02608093  | -0.468891209 | 0.639463712 | 0.783909339 | no |
| NME3      | -0.026075312 | -0.468790144 | 0.639535879 | 0.783909805 | no |
| IL21      | -0.026075222 | -0.468788512 | 0.639537044 | 0.783909805 | no |
| KIAA0391  | -0.026068038 | -0.468659271 | 0.639629336 | 0.78393511  | no |
| VPS35     | 0.026067936  | 0.468657442  | 0.639630643 | 0.78393511  | no |
| C6orf195  | 0.026060536  | 0.468524313  | 0.639725717 | 0.784006922 | no |
| SCNM1     | -0.02605293  | -0.468387483 | 0.639823441 | 0.784081974 | no |
| PLD5      | -0.0260287   | -0.467951569 | 0.640134813 | 0.784408387 | no |
| SLC35G1   | 0.026025119  | 0.467887135  | 0.640180843 | 0.784408387 | no |
| GJB7      | 0.026023683  | 0.467861302  | 0.640199298 | 0.784408387 | no |
| RNASEH2B  | -0.026019023 | -0.467777481 | 0.640259181 | 0.784437036 | no |
| CCDC37    | 0.026005043  | 0.46752596   | 0.640438885 | 0.784612477 | no |
| KIAA1804  | 0.025988916  | 0.467235841  | 0.640646192 | 0.784811525 | no |

|              |              |              |             |             |    |
|--------------|--------------|--------------|-------------|-------------|----|
| KRTCAP3      | -0.025986723 | -0.467196376 | 0.640674394 | 0.784811525 | no |
| IGSF10       | 0.02597803   | 0.467039999  | 0.640786149 | 0.784903683 | no |
| TCEAL8       | 0.025968995  | 0.466877455  | 0.640902319 | 0.78499205  | no |
| RRN3P3       | -0.025966738 | -0.466836847 | 0.640931343 | 0.78499205  | no |
| EIF3G        | -0.025941671 | -0.466385881 | 0.641253701 | 0.785294817 | no |
| DDI1         | -0.025941101 | -0.466375631 | 0.641261029 | 0.785294817 | no |
| ARMC6        | -0.025938991 | -0.466337667 | 0.641288169 | 0.785294817 | no |
| ALX3         | -0.025928535 | -0.466149554 | 0.641422659 | 0.785365735 | no |
| GAP43        | 0.025928481  | 0.466148584  | 0.641423352 | 0.785365735 | no |
| MYL10        | -0.025925965 | -0.466103322 | 0.641455714 | 0.785365735 | no |
| OCRL         | 0.025922819  | 0.466046717  | 0.641496186 | 0.785370544 | no |
| MRPS35       | -0.025918878 | -0.465975818 | 0.64154688  | 0.785373852 | no |
| TFAMP1       | 0.025916927  | 0.46594072   | 0.641571976 | 0.785373852 | no |
| AGBL3        | 0.025900593  | 0.465646868  | 0.641782107 | 0.78556878  | no |
| DNAAF1       | 0.025898866  | 0.465615808  | 0.64180432  | 0.78556878  | no |
| CDH17        | 0.025893202  | 0.465513899  | 0.641877201 | 0.785613243 | no |
| LOC401463    | -0.025888355 | -0.465426707 | 0.641939561 | 0.785644824 | no |
| PSMD1        | -0.025879663 | -0.465270331 | 0.642051407 | 0.785736962 | no |
| MYADML       | -0.025873222 | -0.465154451 | 0.642134294 | 0.785793652 | no |
| ZNF567       | -0.025852912 | -0.464789074 | 0.642395672 | 0.786068746 | no |
| MYEOV        | -0.025843681 | -0.464623018 | 0.642514477 | 0.786150927 | no |
| PRPF31       | 0.025839389  | 0.464545802  | 0.642569725 | 0.786150927 | no |
| GOLGA8I      | -0.025839168 | -0.46454182  | 0.642572574 | 0.786150927 | no |
| HOXA11       | -0.025832004 | -0.46441294  | 0.642664791 | 0.78616863  | no |
| LOC90246     | -0.025830963 | -0.464394206 | 0.642678197 | 0.78616863  | no |
| SMIM7        | -0.025827935 | -0.464339731 | 0.642717177 | 0.78616863  | no |
| TAAR9        | -0.025823889 | -0.464266955 | 0.642769254 | 0.78616863  | no |
| PRR5-ARHGAP8 | 0.025823835  | 0.464265983  | 0.64276995  | 0.78616863  | no |
| SPATA2       | -0.025812908 | -0.464069397 | 0.642910633 | 0.786295949 | no |
| CEP152       | 0.025797083  | 0.463784709  | 0.643114388 | 0.786500388 | no |
| LOC286467    | -0.025766699 | -0.463238094 | 0.643505683 | 0.786934143 | no |
| BCORL1       | -0.02575604  | -0.463046326 | 0.643642984 | 0.787011679 | no |
| MMP20        | 0.025754926  | 0.463026288  | 0.643657331 | 0.787011679 | no |
| C6orf226     | -0.025753248 | -0.462996097 | 0.643678948 | 0.787011679 | no |
| IGLL1        | -0.025741773 | -0.462789674 | 0.643826759 | 0.787113768 | no |
| CMPK1        | 0.02574108   | 0.462777194  | 0.643835696 | 0.787113768 | no |
| PIGM         | -0.025725132 | -0.462490293 | 0.644041158 | 0.787320166 | no |
| DHX29        | 0.025715774  | 0.462321947  | 0.64416173  | 0.787422771 | no |
| ANXA6        | -0.025708923 | -0.462198688 | 0.644250016 | 0.7874859   | no |
| USP50        | 0.025704839  | 0.462125217  | 0.644302644 | 0.787505438 | no |
| NACA2        | -0.025699542 | -0.462029934 | 0.644370898 | 0.787544072 | no |
| ALKBH8       | 0.025691402  | 0.461883495  | 0.644475802 | 0.78758646  | no |
| AVPR1B       | -0.025691164 | -0.461879206 | 0.644478874 | 0.78758646  | no |
| SNHG11       | 0.02568474   | 0.461763651  | 0.644561659 | 0.787642839 | no |
| FAM225A      | 0.025672264  | 0.461539205  | 0.644722468 | 0.787714428 | no |
| KCNQ5-AS1    | -0.025671932 | -0.461533228 | 0.64472675  | 0.787714428 | no |
| RUVBL1       | 0.025671664  | 0.461528409  | 0.644730203 | 0.787714428 | no |
| CTSL1P2      | -0.025662299 | -0.461359933 | 0.644850922 | 0.78776386  | no |
| PRB1         | -0.025659115 | -0.461302648 | 0.644891971 | 0.78776386  | no |
| NUP62        | -0.025657629 | -0.461275911 | 0.644911131 | 0.78776386  | no |
| PABPN1L      | -0.025654967 | -0.461228035 | 0.644945439 | 0.78776386  | no |

|              |              |              |             |             |    |
|--------------|--------------|--------------|-------------|-------------|----|
| FGF19        | -0.025654308 | -0.461216173 | 0.64495394  | 0.78776386  | no |
| FOXN1        | -0.025650514 | -0.461147925 | 0.645002847 | 0.787778824 | no |
| ZFX-AS1      | -0.02563292  | -0.460831399 | 0.645229698 | 0.788004826 | no |
| OR2V1        | -0.02562751  | -0.460734076 | 0.645299455 | 0.788004826 | no |
| SCARNA14     | -0.025625709 | -0.46070168  | 0.645322676 | 0.788004826 | no |
| PRIM2        | 0.025623478  | 0.460661547  | 0.645351442 | 0.788004826 | no |
| LINC00547    | 0.025621944  | 0.460633952  | 0.645371223 | 0.788004826 | no |
| OR5T2        | -0.025608734 | -0.460396303 | 0.64554158  | 0.788151251 | no |
| LOC100506451 | -0.025606958 | -0.460364344 | 0.645564491 | 0.788151251 | no |
| SCTR         | -0.025597818 | -0.460199929 | 0.645682363 | 0.788227347 | no |
| S100A7       | -0.025596438 | -0.460175087 | 0.645700174 | 0.788227347 | no |
| VGF          | -0.025591949 | -0.460094339 | 0.645758068 | 0.788253246 | no |
| FOXL2        | 0.025581621  | 0.459908532  | 0.645891295 | 0.78833397  | no |
| POU5F2       | -0.025581135 | -0.459899789 | 0.645897564 | 0.78833397  | no |
| OR5H15       | -0.025573929 | -0.459770153 | 0.645990522 | 0.788402652 | no |
| ANP32AP1     | -0.025556474 | -0.459456147 | 0.646215709 | 0.788632697 | no |
| ENTPD8       | -0.02554172  | -0.459190725 | 0.64640608  | 0.78882023  | no |
| SOX7         | 0.025525837  | 0.458904997  | 0.646611041 | 0.788944098 | no |
| ZNF789       | 0.025522203  | 0.458839628  | 0.646657936 | 0.788944098 | no |
| FLJ33360     | 0.025521587  | 0.45882853   | 0.646665898 | 0.788944098 | no |
| DUS4L        | 0.025521441  | 0.458825918  | 0.646667771 | 0.788944098 | no |
| C7orf62      | 0.025519631  | 0.458793349  | 0.646691137 | 0.788944098 | no |
| LOC729966    | -0.025512147 | -0.458658724 | 0.646787722 | 0.788979932 | no |
| OR8B4        | -0.025511666 | -0.458650065 | 0.646793935 | 0.788979932 | no |
| PI4KB        | 0.025504825  | 0.458526988  | 0.64688224  | 0.789042864 | no |
| ELMOD1       | 0.025497055  | 0.45838721   | 0.646982534 | 0.789120411 | no |
| LINC00443    | -0.025485572 | -0.458180633 | 0.64713077  | 0.789237786 | no |
| INPP4B       | -0.025483911 | -0.458150749 | 0.647152215 | 0.789237786 | no |
| CLDN7        | 0.025478777  | 0.458058389  | 0.647218496 | 0.78927383  | no |
| C21orf91     | -0.02547305  | -0.45795537  | 0.64729243  | 0.789319202 | no |
| TIMM22       | 0.025464954  | 0.457809721  | 0.647396965 | 0.789401882 | no |
| CLPS         | 0.025459344  | 0.457708806  | 0.647469397 | 0.789407674 | no |
| ZIM3         | -0.025458896 | -0.457700751 | 0.647475179 | 0.789407674 | no |
| LBR          | -0.025449196 | -0.457526241 | 0.647600442 | 0.789458326 | no |
| C5orf60      | -0.02544915  | -0.457525419 | 0.647601032 | 0.789458326 | no |
| AOC4         | 0.025447145  | 0.457489347  | 0.647626927 | 0.789458326 | no |
| LINC00308    | -0.025438967 | -0.457342235 | 0.647732533 | 0.789532692 | no |
| DEPTOR       | -0.025434108 | -0.457254825 | 0.647795285 | 0.789532692 | no |
| CDR2L        | 0.025433067  | 0.457236088  | 0.647808737 | 0.789532692 | no |
| SMR3B        | -0.025427697 | -0.45713948  | 0.647878096 | 0.789532692 | no |
| LONP2        | -0.025423239 | -0.457059287 | 0.647935673 | 0.789532692 | no |
| FLJ39739     | -0.025422563 | -0.457047127 | 0.647944403 | 0.789532692 | no |
| SF3B5        | 0.025421579  | 0.457029432  | 0.647957109 | 0.789532692 | no |
| FGF23        | -0.025419665 | -0.456994994 | 0.647981835 | 0.789532692 | no |
| TRAPPC2L     | -0.025415678 | -0.456923261 | 0.64803334  | 0.789550684 | no |
| GOLT1A       | 0.025411374  | 0.456845846  | 0.648088927 | 0.789562324 | no |
| UQCRQ        | -0.02540925  | -0.456807625 | 0.648116372 | 0.789562324 | no |
| REG3G        | -0.025402914 | -0.456693653 | 0.648198214 | 0.789617267 | no |
| HP1BP3       | 0.025397565  | 0.456597418  | 0.648267323 | 0.789656693 | no |
| SP3          | 0.025391228  | 0.456483423  | 0.648349189 | 0.789711653 | no |
| ZNF69        | 0.025382469  | 0.456325852  | 0.648462357 | 0.789804733 | no |

|              |              |              |             |             |    |
|--------------|--------------|--------------|-------------|-------------|----|
| DYX1C1       | 0.025378668  | 0.456257473  | 0.648511468 | 0.789819787 | no |
| MMS22L       | -0.025365862 | -0.456027103 | 0.64867694  | 0.789976547 | no |
| LOC285074    | 0.025362207  | 0.45596135   | 0.648724173 | 0.789989303 | no |
| FAM134C      | -0.025358072 | -0.455886958 | 0.648777613 | 0.790009614 | no |
| CHST4        | 0.025335939  | 0.455488794  | 0.649063669 | 0.790313162 | no |
| SLC35E2B     | -0.025323031 | -0.455256589 | 0.649230517 | 0.790460277 | no |
| MIR765       | 0.025320901  | 0.455218269  | 0.649258053 | 0.790460277 | no |
| REG1A        | -0.025306364 | -0.454956764 | 0.649445979 | 0.790616138 | no |
| LY6G6C       | 0.025305307  | 0.454937744  | 0.649459648 | 0.790616138 | no |
| PDE6C        | -0.025297683 | -0.454800595 | 0.649558218 | 0.790691343 | no |
| ALAS2        | 0.025288322  | 0.454632188  | 0.649679261 | 0.790776038 | no |
| OR2Y1        | -0.025286611 | -0.454601406 | 0.649701387 | 0.790776038 | no |
| MTRR         | 0.025281207  | 0.454504198  | 0.649771261 | 0.790816296 | no |
| MGLL         | 0.025267052  | 0.45424955   | 0.649954318 | 0.790994295 | no |
| TRAF2        | 0.025257549  | 0.454078609  | 0.650077214 | 0.79109906  | no |
| SMG9         | 0.025242967  | 0.453816288  | 0.650265824 | 0.79128378  | no |
| LINC00327    | 0.025234553  | 0.453664911  | 0.650374676 | 0.791338662 | no |
| LENG8        | 0.025231528  | 0.453610496  | 0.650413806 | 0.791338662 | no |
| FBXO47       | 0.025230941  | 0.453599947  | 0.650421392 | 0.791338662 | no |
| PPL          | -0.025225968 | -0.453510479 | 0.650485731 | 0.791367424 | no |
| CLASP1       | -0.025221743 | -0.453434476 | 0.65054039  | 0.791367424 | no |
| LINC00244    | 0.025220575  | 0.453413463  | 0.650555502 | 0.791367424 | no |
| SPATA31E1    | -0.025213544 | -0.453286981 | 0.650646468 | 0.791433283 | no |
| MAGEB5       | -0.025205694 | -0.45314576  | 0.65074804  | 0.791512034 | no |
| OSBPL5       | 0.025197227  | 0.452993445  | 0.650857599 | 0.791600491 | no |
| EIF3C        | -0.025157306 | -0.452275296 | 0.651374261 | 0.792145579 | no |
| GOT2         | -0.025156902 | -0.452268026 | 0.651379492 | 0.792145579 | no |
| WDR64        | 0.0251425    | 0.452008946  | 0.651565925 | 0.792327466 | no |
| IST1         | 0.025123819  | 0.45167289   | 0.651807783 | 0.792576726 | no |
| HSD17B2      | -0.025117655 | -0.451561998 | 0.651887599 | 0.792615423 | no |
| MLNR         | -0.025115664 | -0.451526196 | 0.651913369 | 0.792615423 | no |
| TOP1MT       | 0.025106214  | 0.451356184  | 0.652035748 | 0.792719368 | no |
| DCP1A        | -0.025102414 | -0.451287829 | 0.652084954 | 0.792734345 | no |
| DEFB115      | -0.025081088 | -0.450904192 | 0.652361149 | 0.792996558 | no |
| LOC100130855 | -0.025080061 | -0.450885728 | 0.652374442 | 0.792996558 | no |
| OR2Z1        | -0.025066422 | -0.450640363 | 0.652551117 | 0.793166453 | no |
| TYW1B        | 0.025061771  | 0.450556695  | 0.652611366 | 0.793194823 | no |
| OR10A7       | -0.025056382 | -0.45045975  | 0.652681178 | 0.793234813 | no |
| ABLIM2       | -0.025049935 | -0.450343787 | 0.652764691 | 0.793291448 | no |
| PRPF40A      | 0.025040808  | 0.450179585  | 0.65288295  | 0.793390301 | no |
| SLC45A4      | 0.025024739  | 0.449890522  | 0.653091157 | 0.793598443 | no |
| OR1L6        | -0.02502025  | -0.449809778 | 0.65314932  | 0.793624246 | no |
| EMCN-IT3     | 0.025007279  | 0.449576442  | 0.653317414 | 0.793751946 | no |
| PDZK1        | 0.025006441  | 0.449561352  | 0.653328285 | 0.793751946 | no |
| C15orf40     | -0.025002421 | -0.449489041 | 0.653380381 | 0.793770366 | no |
| OR52R1       | -0.024997225 | -0.449395573 | 0.653447723 | 0.793807304 | no |
| MRPL14       | -0.024992707 | -0.449314307 | 0.653506275 | 0.793833561 | no |
| KCNU1        | -0.024989779 | -0.449261624 | 0.653544234 | 0.793834801 | no |
| TMEM161A     | -0.024982549 | -0.449131567 | 0.653637948 | 0.793878484 | no |
| LOC649133    | -0.024976841 | -0.449028888 | 0.653711937 | 0.793878484 | no |
| SMR3A        | -0.024976351 | -0.449020072 | 0.65371829  | 0.793878484 | no |

|             |              |              |             |             |    |
|-------------|--------------|--------------|-------------|-------------|----|
| KRBA1       | 0.024975605  | 0.449006657  | 0.653727958 | 0.793878484 | no |
| LINC00202-1 | -0.02497075  | -0.448919307 | 0.653790904 | 0.793910064 | no |
| PMS1        | -0.024967384 | -0.448858768 | 0.653834532 | 0.793918183 | no |
| EIF4A3      | -0.024959791 | -0.448722164 | 0.653932981 | 0.793992864 | no |
| ROS1        | -0.024954623 | -0.448629198 | 0.653999983 | 0.794029356 | no |
| ACTL6A      | 0.024947597  | 0.448502806  | 0.654091082 | 0.794095098 | no |
| C4orf19     | 0.024937204  | 0.448315851  | 0.65422584  | 0.794213835 | no |
| DMC1        | -0.024924281 | -0.448083385 | 0.65439342  | 0.794372401 | no |
| PEX3        | 0.024920347  | 0.448012619  | 0.654444437 | 0.794380121 | no |
| SRSF3       | 0.02491809   | 0.44797202   | 0.654473706 | 0.794380121 | no |
| CHMP5       | 0.024915028  | 0.447916933  | 0.654513422 | 0.794383461 | no |
| NAA20       | 0.024897201  | 0.447596234  | 0.654744653 | 0.79461923  | no |
| TM4SF4      | -0.024891453 | -0.447492846 | 0.654819205 | 0.794664833 | no |
| LOC441461   | 0.02488772   | 0.447425686  | 0.654867635 | 0.794678732 | no |
| NPAS4       | -0.024873837 | -0.447175951 | 0.655047735 | 0.794852401 | no |
| UMPS        | -0.02486778  | -0.447066983 | 0.655126326 | 0.794872523 | no |
| LOC401397   | 0.024866857  | 0.447050394  | 0.655138291 | 0.794872523 | no |
| RASSF4      | 0.024863313  | 0.446986635  | 0.655184277 | 0.794883443 | no |
| WDR46       | 0.02484708   | 0.446694622  | 0.655394911 | 0.795094103 | no |
| FCER2       | -0.024842937 | -0.446620089 | 0.655448678 | 0.795114447 | no |
| C3orf35     | 0.02482895   | 0.446368479  | 0.655630196 | 0.795289753 | no |
| NDUFB4      | 0.024815802  | 0.446131961  | 0.655800846 | 0.795451856 | no |
| LOC728323   | 0.02480765   | 0.445985326  | 0.655906654 | 0.795505238 | no |
| API5        | 0.024806708  | 0.445968371  | 0.655918888 | 0.795505238 | no |
| LINC00570   | 0.024803101  | 0.445903492  | 0.655965705 | 0.795517125 | no |
| LOC283403   | -0.024798164 | -0.44581468  | 0.656029795 | 0.79553982  | no |
| CPSF4L      | 0.02479551   | 0.445766931  | 0.656064253 | 0.79553982  | no |
| RBM46       | 0.024793105  | 0.445723673  | 0.656095471 | 0.79553982  | no |
| OR51B6      | 0.024789268  | 0.445654649  | 0.656145285 | 0.795542427 | no |
| WNT2B       | 0.024787044  | 0.445614638  | 0.656174161 | 0.795542427 | no |
| LHFPL3-AS2  | -0.024784385 | -0.445566819 | 0.656208674 | 0.795542427 | no |
| LCE6A       | -0.024772995 | -0.445361922 | 0.65635656  | 0.79567683  | no |
| ST20-MTHFS  | 0.02475796   | 0.445091455  | 0.656551793 | 0.795804578 | no |
| SNORA36C    | 0.024756638  | 0.445067676  | 0.656568959 | 0.795804578 | no |
| C15orf57    | 0.024754559  | 0.445030284  | 0.656595952 | 0.795804578 | no |
| PGM1        | 0.024750205  | 0.44495196   | 0.656652495 | 0.795804578 | no |
| EMC10       | -0.024749716 | -0.444943166 | 0.656658844 | 0.795804578 | no |
| ZNF324B     | 0.02474777   | 0.444908157  | 0.656684118 | 0.795804578 | no |
| CCNH        | -0.024738325 | -0.444738255 | 0.656806782 | 0.795904179 | no |
| XKR6        | -0.024731583 | -0.444616962 | 0.656894357 | 0.795904179 | no |
| DI030S      | 0.024728702  | 0.444565148  | 0.656931769 | 0.795904179 | no |
| C8orf22     | -0.024727501 | -0.44454354  | 0.656947371 | 0.795904179 | no |
| HABP2       | 0.024727185  | 0.444537851  | 0.656951479 | 0.795904179 | no |
| OR3A2       | -0.024712622 | -0.44427588  | 0.657140648 | 0.796088482 | no |
| ATXN3L      | 0.024704474  | 0.444129321  | 0.657246489 | 0.796171822 | no |
| CABLES2     | -0.024699523 | -0.444040257 | 0.657310811 | 0.796179193 | no |
| HIST1H1E    | -0.024697112 | -0.443996881 | 0.657342139 | 0.796179193 | no |
| TRMT1L      | 0.024695451  | 0.443967006  | 0.657363715 | 0.796179193 | no |
| GTF2A1      | 0.024686711  | 0.443809776  | 0.657477278 | 0.796240181 | no |
| ZBTB40      | -0.024685872 | -0.443794696 | 0.65748817  | 0.796240181 | no |
| GANC        | -0.024680314 | -0.443694706 | 0.657560394 | 0.796282776 | no |

|              |              |              |             |             |    |
|--------------|--------------|--------------|-------------|-------------|----|
| NAALADL2-AS3 | -0.024671211 | -0.443530962 | 0.657678675 | 0.796340441 | no |
| FAM204A      | -0.024668236 | -0.443477443 | 0.657717338 | 0.796340441 | no |
| LOC284688    | 0.024667195  | 0.443458723  | 0.657730861 | 0.796340441 | no |
| FAM71F1      | 0.024665243  | 0.443423604  | 0.657756231 | 0.796340441 | no |
| DHRS7C       | -0.024662004 | -0.443365337 | 0.657798325 | 0.796346541 | no |
| DYNLL1       | -0.024648848 | -0.443128686 | 0.657969299 | 0.796508658 | no |
| KRT10        | -0.024631858 | -0.442823054 | 0.658190137 | 0.79669931  | no |
| C1orf122     | 0.024631027  | 0.442808113  | 0.658200933 | 0.79669931  | no |
| SLC2A1       | 0.024623199  | 0.442667292  | 0.658302696 | 0.796744542 | no |
| TENM1        | -0.024620862 | -0.442625256 | 0.658333074 | 0.796744542 | no |
| PIP5K1P1     | -0.024619597 | -0.442602497 | 0.658349522 | 0.796744542 | no |
| FAM118B      | 0.024616229  | 0.442541917  | 0.658393302 | 0.796752658 | no |
| COL6A5       | 0.024597401  | 0.442203222  | 0.658638096 | 0.797004015 | no |
| PPFIBP2      | -0.024590114 | -0.442072145 | 0.658732841 | 0.797073785 | no |
| CPA6         | 0.024580848  | 0.441905463  | 0.658853333 | 0.797174697 | no |
| UGT1A3       | -0.024576732 | -0.441831416 | 0.658906863 | 0.797194583 | no |
| NT5DC1       | 0.024537471  | 0.441125167  | 0.659417509 | 0.79776749  | no |
| TRIT1        | -0.024532087 | -0.441028327 | 0.659487541 | 0.797770647 | no |
| LSM5         | 0.024527658  | 0.44094865   | 0.659545164 | 0.797770647 | no |
| LINC00602    | -0.024526553 | -0.440928772 | 0.659559539 | 0.797770647 | no |
| C11orf84     | -0.024523762 | -0.440878561 | 0.659595853 | 0.797770647 | no |
| TKTL1        | -0.024521175 | -0.44083203  | 0.659629506 | 0.797770647 | no |
| KCTD19       | -0.024520149 | -0.440813586 | 0.659642846 | 0.797770647 | no |
| MATN1        | -0.024514511 | -0.440712165 | 0.659716201 | 0.797775524 | no |
| LOC440335    | -0.024514133 | -0.440705362 | 0.659721121 | 0.797775524 | no |
| NF1P2        | 0.024511012  | 0.440649219  | 0.65976173  | 0.797779741 | no |
| ESCO2        | -0.024506036 | -0.440559707 | 0.659826475 | 0.797813141 | no |
| FAM151A      | -0.024496849 | -0.440394449 | 0.659946016 | 0.797876313 | no |
| NDP          | -0.024496314 | -0.440384833 | 0.659952973 | 0.797876313 | no |
| SLC18B1      | -0.024491438 | -0.440297121 | 0.660016424 | 0.797899165 | no |
| GEMIN7       | 0.024488555  | 0.440245245  | 0.660053952 | 0.797899165 | no |
| FOXI1        | 0.024486303  | 0.44020474   | 0.660083256 | 0.797899165 | no |
| KIFAP3       | 0.02448227   | 0.440132188  | 0.660135744 | 0.797917732 | no |
| OR7C1        | 0.024476388  | 0.440026384  | 0.660212292 | 0.797965376 | no |
| CPLX4        | 0.024466024  | 0.439839965  | 0.660347173 | 0.798083516 | no |
| LOC100505676 | -0.024456559 | -0.439669704 | 0.660470372 | 0.798187526 | no |
| ARHGEF37     | -0.024447754 | -0.439511316 | 0.660584989 | 0.798281151 | no |
| OR10P1       | -0.024436183 | -0.439303167 | 0.660735627 | 0.798418294 | no |
| PPP1R17      | 0.024431004  | 0.439210001  | 0.660803056 | 0.798454879 | no |
| FEZ2         | -0.024427012 | -0.439138188 | 0.660855032 | 0.798472789 | no |
| METTL9       | -0.024423277 | -0.439071011 | 0.660903654 | 0.798486645 | no |
| ELOF1        | -0.024406059 | -0.43876128  | 0.661127856 | 0.798712618 | no |
| FNIP2        | -0.024380062 | -0.438293648 | 0.661466414 | 0.79903383  | no |
| TTC25        | 0.024379933  | 0.438291323  | 0.661468097 | 0.79903383  | no |
| BROX         | 0.024372973  | 0.438166123  | 0.661558752 | 0.799071886 | no |
| CERS4        | -0.024371805 | -0.438145114 | 0.661573964 | 0.799071886 | no |
| CCDC140      | 0.024364952  | 0.438021852  | 0.661663221 | 0.799134781 | no |
| IL31RA       | 0.024361358  | 0.437957193  | 0.661710045 | 0.799146422 | no |
| KRTAP19-2    | -0.024356786 | -0.437874945 | 0.661769607 | 0.799164222 | no |
| ZNF503-AS1   | 0.024354517  | 0.437834142  | 0.661799156 | 0.799164222 | no |
| PRDM9        | -0.024343857 | -0.437642379 | 0.661938037 | 0.799287019 | no |

|              |              |              |             |             |    |
|--------------|--------------|--------------|-------------|-------------|----|
| GNL3L        | 0.024330372  | 0.43739982   | 0.662113723 | 0.799429087 | no |
| PMPCA        | -0.024328096 | -0.437358875 | 0.662143382 | 0.799429087 | no |
| SLC25A51P1   | -0.024326262 | -0.437325872 | 0.662167288 | 0.799429087 | no |
| OR6N1        | -0.024321758 | -0.437244866 | 0.662225967 | 0.799455019 | no |
| CACNA2D3-AS1 | -0.024302824 | -0.436904275 | 0.662472706 | 0.799707966 | no |
| NUSAP1       | -0.024298292 | -0.43682276  | 0.662531765 | 0.799731901 | no |
| SLFNL1       | 0.024295592  | 0.436774186  | 0.662566958 | 0.799731901 | no |
| FARP2        | -0.024279215 | -0.436479594 | 0.662780416 | 0.799944621 | no |
| LINC00705    | -0.024271956 | -0.43634901  | 0.662875044 | 0.799994937 | no |
| ZIC4         | 0.024270306  | 0.436319329  | 0.662896553 | 0.799994937 | no |
| LOC100505817 | 0.024264252  | 0.436210442  | 0.662975464 | 0.800045241 | no |
| SCGB1D4      | -0.024259785 | -0.436130082 | 0.663033703 | 0.800070596 | no |
| TESC         | 0.024238993  | 0.435756075  | 0.663304785 | 0.800327174 | no |
| GPR142       | -0.024236927 | -0.435718913 | 0.663331722 | 0.800327174 | no |
| SENP1        | -0.024230614 | -0.435605362 | 0.663414035 | 0.800327174 | no |
| SNRNP2       | -0.024229261 | -0.435581014 | 0.663431685 | 0.800327174 | no |
| RD3          | -0.024229196 | -0.435579841 | 0.663432535 | 0.800327174 | no |
| NPHP3        | -0.024224078 | -0.435487794 | 0.663499263 | 0.800362745 | no |
| CLDN16       | 0.024201613  | 0.435083679  | 0.663792251 | 0.800671228 | no |
| OR10H2       | -0.024193254 | -0.434933316 | 0.663901279 | 0.800757795 | no |
| SNORD23      | -0.024189731 | -0.434869945 | 0.663947232 | 0.800768278 | no |
| TGFA         | -0.024172895 | -0.434567102 | 0.664166851 | 0.80095853  | no |
| LINC00113    | -0.024171924 | -0.434549639 | 0.664179515 | 0.80095853  | no |
| IGLL3P       | -0.024156005 | -0.434263287 | 0.664387204 | 0.801164033 | no |
| HDDC3        | -0.024145218 | -0.434069247 | 0.664527954 | 0.801191101 | no |
| HPDL         | -0.024144668 | -0.434059351 | 0.664535132 | 0.801191101 | no |
| KLF9         | -0.024144629 | -0.434058666 | 0.664535629 | 0.801191101 | no |
| DKFZP434K028 | -0.024138218 | -0.433943338 | 0.66461929  | 0.801191101 | no |
| MYC          | -0.0241354   | -0.433892642 | 0.664656067 | 0.801191101 | no |
| LOC644961    | 0.024134258  | 0.433872105  | 0.664670965 | 0.801191101 | no |
| IL23R        | -0.024133074 | -0.433850812 | 0.664686413 | 0.801191101 | no |
| OPN1LW       | -0.024131428 | -0.433821203 | 0.664707893 | 0.801191101 | no |
| VAPB         | -0.024117409 | -0.433569028 | 0.66489085  | 0.801356102 | no |
| DYNC2LI1     | -0.024113895 | -0.433505811 | 0.664936718 | 0.801356102 | no |
| CEP164       | 0.024112367  | 0.43347834   | 0.66495665  | 0.801356102 | no |
| SETD8        | 0.024094371  | 0.433154614  | 0.665191557 | 0.801594244 | no |
| RPS17        | 0.024080768  | 0.432909936  | 0.665369125 | 0.801763267 | no |
| CCDC42B      | 0.024077029  | 0.432842675  | 0.665417941 | 0.801777135 | no |
| SH2D4B       | -0.024057137 | -0.432484857 | 0.66567766  | 0.802045108 | no |
| MXD1         | 0.024049426  | 0.43234616   | 0.665778342 | 0.802121446 | no |
| OR4C16       | -0.024043796 | -0.43224489  | 0.665851859 | 0.802165049 | no |
| INSC         | -0.024025729 | -0.431919908 | 0.666087804 | 0.802404315 | no |
| CYP4F35P     | -0.0240213   | -0.431840232 | 0.666145655 | 0.802429027 | no |
| TRIM59       | 0.024010635  | 0.431648402  | 0.666284949 | 0.802551835 | no |
| KRTAP13-2    | -0.024003396 | -0.431518187 | 0.666379508 | 0.802620748 | no |
| FAM207A      | -0.023998193 | -0.431424585 | 0.666447483 | 0.802657636 | no |
| TTC9         | -0.023987171 | -0.431226328 | 0.666591469 | 0.802745661 | no |
| ZNF366       | 0.023986879  | 0.431221087  | 0.666595275 | 0.802745661 | no |
| FAM50A       | 0.023980979  | 0.431114949  | 0.666672365 | 0.802793511 | no |
| CLDN10-AS1   | -0.023969889 | -0.430915465 | 0.666817262 | 0.802923004 | no |
| HPRT1        | -0.023959751 | -0.430733111 | 0.666949726 | 0.803012286 | no |

|           |              |              |             |             |    |
|-----------|--------------|--------------|-------------|-------------|----|
| ACVR1B    | -0.023957819 | -0.430698356 | 0.666974975 | 0.803012286 | no |
| PAQR4     | -0.023954571 | -0.430639933 | 0.667017416 | 0.803012286 | no |
| FLI1      | -0.023952776 | -0.43060765  | 0.667040869 | 0.803012286 | no |
| YIPF6     | -0.023947078 | -0.43050515  | 0.667115336 | 0.803013263 | no |
| LDHC      | -0.023946996 | -0.430503669 | 0.667116412 | 0.803013263 | no |
| WFDC5     | -0.023934802 | -0.430284331 | 0.667275773 | 0.803160102 | no |
| WHAMMP2   | 0.02392686   | 0.430141476  | 0.667379572 | 0.803240053 | no |
| FGA       | 0.023921596  | 0.430046794  | 0.667448372 | 0.803277872 | no |
| PRKCQ     | -0.023911245 | -0.429860603 | 0.667583676 | 0.803374946 | no |
| MYOZ3     | -0.023909706 | -0.429832918 | 0.667603795 | 0.803374946 | no |
| TNFRSF21  | -0.023902539 | -0.429703994 | 0.66769749  | 0.803442707 | no |
| PTCHD3    | -0.023879931 | -0.429297328 | 0.667993068 | 0.803753375 | no |
| MRPL42P5  | 0.02387067   | 0.429130745  | 0.668114161 | 0.803854072 | no |
| OR2T10    | 0.023861609  | 0.428967766  | 0.668232642 | 0.803951616 | no |
| HOXA9     | -0.023839358 | -0.428567522 | 0.668523644 | 0.804256697 | no |
| DLD       | -0.023830046 | -0.428400027 | 0.668645438 | 0.804358193 | no |
| KLK6      | -0.023820801 | -0.428233729 | 0.668766371 | 0.80444935  | no |
| ESD       | 0.02381853   | 0.428192878  | 0.668796079 | 0.80444935  | no |
| RSP01     | -0.023807936 | -0.428002326 | 0.668934662 | 0.804509776 | no |
| PDE3B     | 0.023807008  | 0.427985634  | 0.668946802 | 0.804509776 | no |
| KNCN      | -0.023806105 | -0.427969385 | 0.66895862  | 0.804509776 | no |
| NCAPG     | 0.023802703  | 0.42790819   | 0.669003128 | 0.804518282 | no |
| PDE7B     | 0.023796736  | 0.42780087   | 0.669081187 | 0.804567133 | no |
| WFDC11    | -0.023792863 | -0.427731194 | 0.669131867 | 0.804583056 | no |
| MRPL53    | 0.023789813  | 0.427676331  | 0.669171774 | 0.804586025 | no |
| BNIP1     | -0.023783915 | -0.427570247 | 0.669248942 | 0.804633791 | no |
| DEFA1     | -0.023779034 | -0.427482455 | 0.669312806 | 0.804649811 | no |
| NFKB1B    | 0.023777174  | 0.427448992  | 0.669337149 | 0.804649811 | no |
| NRG1      | -0.023773634 | -0.427385315 | 0.669383473 | 0.804660489 | no |
| LINC00691 | -0.023764939 | -0.42722891  | 0.669497261 | 0.804752258 | no |
| MYF5      | -0.023752115 | -0.426998237 | 0.669665093 | 0.804896863 | no |
| KIF3B     | -0.023749269 | -0.426947057 | 0.669702332 | 0.804896863 | no |
| KRTAP12-3 | -0.023747161 | -0.426909143 | 0.66972992  | 0.804896863 | no |
| ARF1      | 0.023738342  | 0.426750504  | 0.669845357 | 0.804990581 | no |
| FBXW12    | 0.023730367  | 0.426607062  | 0.669949741 | 0.805071007 | no |
| RABGGTB   | -0.023722102 | -0.426458397 | 0.670057933 | 0.805155999 | no |
| VAX1      | -0.023717397 | -0.426373757 | 0.670119533 | 0.805184999 | no |
| TEX35     | 0.023713316  | 0.426300351  | 0.67017296  | 0.805204175 | no |
| PSORS1C3  | 0.023684749  | 0.425786506  | 0.670546993 | 0.805574266 | no |
| ZNF283    | 0.023684064  | 0.425774194  | 0.670555956 | 0.805574266 | no |
| PDILT     | -0.02367895  | -0.425682198 | 0.67062293  | 0.805609691 | no |
| CTSL3P    | 0.023664253  | 0.425417834  | 0.670815403 | 0.805788389 | no |
| MROH1     | 0.023661865  | 0.425374888  | 0.670846673 | 0.805788389 | no |
| OR51A2    | 0.023649337  | 0.425149535  | 0.671010764 | 0.805928747 | no |
| NME2      | -0.023647217 | -0.425111409 | 0.671038528 | 0.805928747 | no |
| SPRYD4    | 0.023641812  | 0.425014183  | 0.67110933  | 0.80596874  | no |
| NUP210P1  | -0.023614228 | -0.424518024 | 0.671470685 | 0.806357649 | no |
| KRTAP4-8  | 0.023605773  | 0.424365948  | 0.671581459 | 0.806440408 | no |
| IL1R2     | 0.02360324   | 0.424320384  | 0.671614649 | 0.806440408 | no |
| HTR3C     | -0.023598796 | -0.424240439 | 0.671672886 | 0.806464969 | no |
| OR1L3     | 0.02359398   | 0.424153816  | 0.671735989 | 0.806464969 | no |



|           |              |              |             |             |    |
|-----------|--------------|--------------|-------------|-------------|----|
| DNAI2     | 0.023593088  | 0.424137767  | 0.671747681 | 0.806464969 | no |
| IL19      | -0.023583769 | -0.423970154 | 0.671869791 | 0.806518858 | no |
| HIST1H3F  | 0.023579127  | 0.423886656  | 0.671930625 | 0.806518858 | no |
| OR7E2P    | 0.023578795  | 0.423880678  | 0.671934981 | 0.806518858 | no |
| HYI       | 0.023578207  | 0.423870109  | 0.671942681 | 0.806518858 | no |
| KRTAP10-9 | -0.023573212 | -0.423780267 | 0.67200814  | 0.806552382 | no |
| BSND      | -0.023564971 | -0.423632026 | 0.672116153 | 0.806607204 | no |
| EFCAB1    | -0.023562021 | -0.423578964 | 0.672154819 | 0.806607204 | no |
| LOC727677 | -0.023561136 | -0.42356305  | 0.672166414 | 0.806607204 | no |
| LIME1     | -0.023557487 | -0.423497416 | 0.672214241 | 0.806619556 | no |
| GCSAML    | 0.023550077  | 0.423364136  | 0.672311365 | 0.806691058 | no |
| ZFHX3     | 0.023539253  | 0.423169436  | 0.672453257 | 0.806816265 | no |
| KCNMB4    | -0.023531827 | -0.423035867 | 0.672550605 | 0.806888017 | no |
| GPC5      | 0.023514733  | 0.422728396  | 0.672774718 | 0.807058694 | no |
| OR5W2     | -0.023514352 | -0.422721541 | 0.672779714 | 0.807058694 | no |
| HOXC11    | -0.02351161  | -0.422672209 | 0.672815675 | 0.807058694 | no |
| OR52I2    | 0.02350952   | 0.422634615  | 0.672843079 | 0.807058694 | no |
| FAHD2B    | -0.023503992 | -0.422535187 | 0.672915561 | 0.807099139 | no |
| POTEH     | 0.02350122   | 0.422485328  | 0.672951908 | 0.807099139 | no |
| ASCL3     | -0.023493629 | -0.422348789 | 0.67305145  | 0.807173477 | no |
| CEP57L1   | 0.023480266  | 0.422108427  | 0.673226696 | 0.807335995 | no |
| DNAAF3    | 0.023476703  | 0.422044341  | 0.673273423 | 0.807335995 | no |
| POLR3G    | 0.02347354   | 0.421987454  | 0.673314903 | 0.807335995 | no |
| TLCD1     | -0.023470819 | -0.421938505 | 0.673350596 | 0.807335995 | no |
| CLEC9A    | 0.023468974  | 0.421905318  | 0.673374795 | 0.807335995 | no |
| TFF2      | -0.023458979 | -0.421725542 | 0.673505891 | 0.807430652 | no |
| STON1     | -0.023457226 | -0.421694009 | 0.673528887 | 0.807430652 | no |
| RLBP1     | -0.023439336 | -0.421372214 | 0.673763574 | 0.807666943 | no |
| LOC729121 | -0.023423306 | -0.421083887 | 0.67397388  | 0.807873984 | no |
| NR1I2     | -0.023418196 | -0.420991973 | 0.674040927 | 0.807891895 | no |
| PIN1P1    | 0.023414998  | 0.420934447  | 0.674082892 | 0.807891895 | no |
| C6orf223  | -0.023413572 | -0.420908803 | 0.674101599 | 0.807891895 | no |
| ERCC4     | 0.02340981   | 0.420841144  | 0.674150957 | 0.807897869 | no |
| C7orf76   | 0.023407462  | 0.420798909  | 0.674181768 | 0.807897869 | no |
| RHOBTB2   | -0.023392086 | -0.420522335 | 0.674383549 | 0.808017241 | no |
| HNF1B     | -0.023390488 | -0.420493592 | 0.674404521 | 0.808017241 | no |
| TCP11L2   | 0.023389029  | 0.420467342  | 0.674423674 | 0.808017241 | no |
| DERA      | 0.023385765  | 0.420408642  | 0.674466504 | 0.808017241 | no |
| DSCC1     | -0.023383693 | -0.420371378 | 0.674493694 | 0.808017241 | no |
| LINC00478 | 0.023378655  | 0.420280757  | 0.674559818 | 0.808017241 | no |
| LOC254099 | 0.023374776  | 0.42021098   | 0.674610734 | 0.808017241 | no |
| DMWD      | -0.023371743 | -0.42015642  | 0.674650549 | 0.808017241 | no |
| LRRC3B    | -0.023368931 | -0.420105849 | 0.674687452 | 0.808017241 | no |
| DCST2     | 0.023367227  | 0.420075188  | 0.674709827 | 0.808017241 | no |
| TTY12     | -0.023366914 | -0.42006957  | 0.674713926 | 0.808017241 | no |
| UBIAD1    | -0.023365495 | -0.420044039 | 0.674732558 | 0.808017241 | no |
| ZNF443    | -0.023358008 | -0.419909374 | 0.674830835 | 0.808089902 | no |
| LINC00565 | 0.02335165   | 0.419795006  | 0.674914303 | 0.808139279 | no |
| RSU1      | 0.023349138  | 0.419749827  | 0.674947277 | 0.808139279 | no |
| CCER1     | -0.023345065 | -0.419676574 | 0.675000742 | 0.80815827  | no |
| FAM109A   | -0.023339482 | -0.419576154 | 0.675074038 | 0.808201    | no |

|              |              |              |             |             |    |
|--------------|--------------|--------------|-------------|-------------|----|
| SPAG11A      | -0.023330106 | -0.419407506 | 0.675197139 | 0.808268718 | no |
| THRSP        | 0.02332839   | 0.419376644  | 0.675219668 | 0.808268718 | no |
| DCUN1D4      | -0.02332658  | -0.419344091 | 0.675243431 | 0.808268718 | no |
| ZCCHC4       | 0.023322799  | 0.419276072  | 0.675293084 | 0.808283134 | no |
| NDST1        | -0.023317615 | -0.419182824 | 0.675361157 | 0.808319593 | no |
| ELK1         | 0.02330409   | 0.418939564  | 0.675538753 | 0.808487127 | no |
| ADCY9        | 0.02329918   | 0.41885124   | 0.675603239 | 0.808519279 | no |
| LCN6         | -0.023284551 | -0.418588117 | 0.675795364 | 0.808685016 | no |
| NT5C         | -0.023282905 | -0.418558504 | 0.675816988 | 0.808685016 | no |
| FBXL5        | 0.023273756  | 0.418393948  | 0.675937154 | 0.808783775 | no |
| ACOX3        | -0.023266083 | -0.418255938 | 0.676037942 | 0.808859337 | no |
| ZFYVE19      | -0.023262799 | -0.418196873 | 0.676081079 | 0.808865917 | no |
| IFNA14       | -0.02325438  | -0.418045437 | 0.676191681 | 0.808919749 | no |
| GPATCH1      | -0.023251758 | -0.41799827  | 0.676226131 | 0.808919749 | no |
| C5orf44      | -0.023250779 | -0.417980659 | 0.676238994 | 0.808919749 | no |
| LOC100286793 | -0.02324624  | -0.417899017 | 0.676298626 | 0.808946055 | no |
| CCDC138      | -0.023242935 | -0.417839576 | 0.676342044 | 0.808952964 | no |
| CCDC11       | 0.023238338  | 0.417756881  | 0.676402448 | 0.808980189 | no |
| DMRT2        | -0.023226594 | -0.417545644 | 0.676556756 | 0.809119714 | no |
| OIT3         | -0.023216409 | -0.417362463 | 0.676690581 | 0.80921638  | no |
| STRA8        | -0.023214711 | -0.417331924 | 0.676712893 | 0.80921638  | no |
| SOCS4        | 0.023207105  | 0.417195115  | 0.676812848 | 0.809290876 | no |
| CBLB         | -0.023202223 | -0.41710729  | 0.676877018 | 0.809308864 | no |
| HIST1H2APS1  | -0.02320023  | -0.417071446 | 0.676903207 | 0.809308864 | no |
| RNASEH2B-AS1 | 0.023191953  | 0.416922583  | 0.677011982 | 0.809393886 | no |
| FBF1         | 0.023182563  | 0.416753685  | 0.677135403 | 0.809496409 | no |
| CRNN         | -0.023170065 | -0.416528883 | 0.67729969  | 0.809618297 | no |
| CACNA1C-IT3  | -0.023166254 | -0.416460327 | 0.677349794 | 0.809618297 | no |
| C11orf96     | 0.023166209  | 0.416459528  | 0.677350378 | 0.809618297 | no |
| GRIK1        | -0.023154193 | -0.41624339  | 0.677508353 | 0.809762083 | no |
| C16orf86     | -0.023145628 | -0.416089336 | 0.677620959 | 0.809851631 | no |
| HCCS         | 0.023142639  | 0.416035586  | 0.677660249 | 0.809853551 | no |
| SEMA4C       | 0.023131115  | 0.415828299  | 0.677811781 | 0.809950474 | no |
| UBE3B        | -0.023130739 | -0.415821533 | 0.677816727 | 0.809950474 | no |
| CST3         | 0.023123882  | 0.415698213  | 0.677906884 | 0.810013168 | no |
| FBN2         | 0.023117854  | 0.415589787  | 0.677986154 | 0.810062848 | no |
| APOA1        | -0.023106429 | -0.415384283 | 0.678136411 | 0.810197331 | no |
| NCBP1        | -0.023101951 | -0.415303739 | 0.678195305 | 0.810222652 | no |
| TMEM143      | 0.0230918    | 0.415121157  | 0.678328817 | 0.810287285 | no |
| PDLIM2       | -0.023090854 | -0.415104139 | 0.678341261 | 0.810287285 | no |
| SNORA78      | 0.023089238  | 0.415075074  | 0.678362516 | 0.810287285 | no |
| PUM1         | -0.023084001 | -0.414980873 | 0.678431405 | 0.810324533 | no |
| ATG4C        | -0.023079345 | -0.414897138 | 0.678492643 | 0.810352639 | no |
| XRCC1        | -0.023066051 | -0.414658028 | 0.678667522 | 0.810501137 | no |
| TSPY4        | 0.02306416   | 0.414624008  | 0.678692405 | 0.810501137 | no |
| ARR3         | 0.023050178  | 0.414372523  | 0.678876356 | 0.810650338 | no |
| CYLC2        | 0.02304893   | 0.414350067  | 0.678892782 | 0.810650338 | no |
| CCDC142      | -0.023031878 | -0.41404336  | 0.679117155 | 0.810873202 | no |
| NBPF15       | -0.023006757 | -0.413591527 | 0.679447746 | 0.811201094 | no |
| EPS8L1       | 0.023005274  | 0.413564858  | 0.67946726  | 0.811201094 | no |
| GPR37        | 0.023002062  | 0.413507074  | 0.679509544 | 0.811206511 | no |

|              |              |              |             |             |    |
|--------------|--------------|--------------|-------------|-------------|----|
| LOC339822    | -0.02299874  | -0.413447333 | 0.679553261 | 0.811209934 | no |
| RNF126P1     | -0.022996108 | -0.413399991 | 0.679587905 | 0.811209934 | no |
| GML          | 0.022986881  | 0.413234026  | 0.679709361 | 0.811309851 | no |
| LINC00479    | 0.022973645  | 0.412995961  | 0.679883596 | 0.811472751 | no |
| RASAL2-AS1   | 0.022967678  | 0.412888632  | 0.679962154 | 0.811521444 | no |
| CCDC6        | -0.022960889 | -0.412766529 | 0.680051529 | 0.811583041 | no |
| EFCAB3       | 0.022948157  | 0.412537516  | 0.680219171 | 0.811738031 | no |
| KLRAP1       | -0.022939075 | -0.412374164 | 0.680338757 | 0.81183566  | no |
| PYDC2        | 0.02292936   | 0.412199429  | 0.680466687 | 0.811943232 | no |
| NUP188       | 0.022925337  | 0.41212707   | 0.680519666 | 0.811945022 | no |
| OR7D2        | -0.022919326 | -0.41201896  | 0.680598823 | 0.811945022 | no |
| DNAJC17      | -0.022917306 | -0.411982628 | 0.680625426 | 0.811945022 | no |
| PRR15L       | -0.022912826 | -0.41190204  | 0.680684435 | 0.811945022 | no |
| GALR2        | 0.022912049  | 0.411888068  | 0.680694666 | 0.811945022 | no |
| LENEP        | -0.022912033 | -0.41188779  | 0.68069487  | 0.811945022 | no |
| ANO7         | 0.022902954  | 0.411724488  | 0.680814452 | 0.811998061 | no |
| HOXB1        | -0.02290292  | -0.411723873 | 0.680814902 | 0.811998061 | no |
| PAXIP1       | -0.022891123 | -0.411511694 | 0.680970288 | 0.812138317 | no |
| LOC284294    | -0.022873492 | -0.411194579 | 0.681202547 | 0.812370232 | no |
| TEX13B       | -0.022862222 | -0.410991875 | 0.681351026 | 0.81248396  | no |
| MTMR9LP      | -0.022860515 | -0.410961162 | 0.681373524 | 0.81248396  | no |
| TMEM158      | 0.022855948  | 0.410879029  | 0.68143369  | 0.812510621 | no |
| PLXNA2       | -0.022838982 | -0.410573856 | 0.681657261 | 0.812732105 | no |
| LOC285547    | -0.022820353 | -0.410238804 | 0.681902753 | 0.8129757   | no |
| TOMM6        | -0.022816778 | -0.410174507 | 0.681949867 | 0.8129757   | no |
| MYBPC3       | 0.022814861  | 0.41014002   | 0.681975138 | 0.8129757   | no |
| DHRS13       | -0.022809957 | -0.410051815 | 0.682039774 | 0.8129757   | no |
| PSG9         | 0.022809127  | 0.410036888  | 0.682050713 | 0.8129757   | no |
| PSMA4        | 0.022800259  | 0.409877384  | 0.682167603 | 0.813069932 | no |
| RLF          | 0.022771653  | 0.409362868  | 0.68254471  | 0.813474288 | no |
| OR56A5       | -0.022767475 | -0.409287723 | 0.682599793 | 0.813494823 | no |
| DSG1         | -0.022763007 | -0.409207356 | 0.682658706 | 0.81351992  | no |
| OR2L2        | -0.022760071 | -0.409154556 | 0.682697412 | 0.813520936 | no |
| MDGA1        | -0.022756602 | -0.409092159 | 0.682743154 | 0.813530335 | no |
| ATP5SL       | 0.022747154  | 0.408922234  | 0.68286773  | 0.813633663 | no |
| CFTR         | -0.022734915 | -0.408702099 | 0.683029128 | 0.813780851 | no |
| POTEB        | 0.022731562  | 0.408641787  | 0.68307335  | 0.813788423 | no |
| MORN1        | 0.022725866  | 0.408539338  | 0.68314847  | 0.813832803 | no |
| LINC00589    | 0.022721828  | 0.408466715  | 0.683201723 | 0.813851129 | no |
| KLKP1        | 0.022711777  | 0.408285929  | 0.683334295 | 0.813963935 | no |
| LOC100128881 | -0.022706648 | -0.408193687 | 0.68340194  | 0.813999396 | no |
| SDC1         | 0.02270245   | 0.408118171  | 0.683457321 | 0.814020245 | no |
| SRSF9        | 0.022694597  | 0.407976929  | 0.68356091  | 0.814098505 | no |
| IFIT5        | 0.022686247  | 0.407826748  | 0.68367106  | 0.81418457  | no |
| VAT1L        | -0.022683189 | -0.407771744 | 0.683711405 | 0.8141875   | no |
| LOC145783    | 0.022679999  | 0.40771437   | 0.683753489 | 0.814192499 | no |
| PCTP         | -0.022673559 | -0.407598543 | 0.683838451 | 0.814248554 | no |
| OR8G5        | 0.022667312  | 0.407486176  | 0.683920878 | 0.814289228 | no |
| LRRC30       | -0.022665227 | -0.407448673 | 0.68394839  | 0.814289228 | no |
| UGT2B17      | 0.022660896  | 0.407370785  | 0.684005529 | 0.814312144 | no |
| TEX101       | -0.022648985 | -0.407156551 | 0.6841627   | 0.814410525 | no |

|              |              |              |             |             |    |
|--------------|--------------|--------------|-------------|-------------|----|
| IL17C        | -0.02264889  | -0.407154836 | 0.684163958 | 0.814410525 | no |
| SLC36A4      | -0.022639361 | -0.40698346  | 0.684289697 | 0.814446802 | no |
| KY           | 0.022637305  | 0.40694648   | 0.68431683  | 0.814446802 | no |
| ITPRIP       | 0.022635434  | 0.406912827  | 0.684341523 | 0.814446802 | no |
| OR10A2       | -0.022635093 | -0.406906696 | 0.684346022 | 0.814446802 | no |
| LOC100507651 | -0.022624355 | -0.406713555 | 0.684487745 | 0.814570359 | no |
| KRTAP20-4    | -0.022614386 | -0.406534257 | 0.684619319 | 0.814634827 | no |
| KRT12        | -0.022607921 | -0.406417973 | 0.684704658 | 0.814634827 | no |
| HOXA10       | -0.022606267 | -0.406388225 | 0.68472649  | 0.814634827 | no |
| KRTAP5-11    | -0.022606233 | -0.406387615 | 0.684726937 | 0.814634827 | no |
| CYP2A7       | 0.022605892  | 0.406381471  | 0.684731447 | 0.814634827 | no |
| KRT16P1      | 0.022583455  | 0.405977934  | 0.685027629 | 0.814935334 | no |
| BOC          | -0.022578782 | -0.405893874 | 0.685089334 | 0.814935334 | no |
| SNORA79      | -0.022578141 | -0.405882349 | 0.685097793 | 0.814935334 | no |
| C6orf123     | -0.022575142 | -0.405828416 | 0.685137384 | 0.814937321 | no |
| AKR1C4       | 0.022558682  | 0.405532361  | 0.685354723 | 0.815108258 | no |
| RAB28        | -0.022558513 | -0.405529326 | 0.68535695  | 0.815108258 | no |
| H3F3A        | -0.02255549  | -0.40547495  | 0.685396872 | 0.815110629 | no |
| SNORA42      | -0.022540434 | -0.40520415  | 0.685595698 | 0.815278529 | no |
| MRPL51       | -0.022534091 | -0.405090074 | 0.685679461 | 0.815278529 | no |
| CXorf64      | -0.022530943 | -0.405033443 | 0.685721046 | 0.815278529 | no |
| KRT16P2      | 0.022530776  | 0.405030446  | 0.685723246 | 0.815278529 | no |
| OR9Q2        | -0.022527756 | -0.404976129 | 0.685763132 | 0.815278529 | no |
| UGT3A1       | -0.022527564 | -0.404972676 | 0.685765668 | 0.815278529 | no |
| CDRT15L2     | 0.022520783  | 0.404850706  | 0.685855236 | 0.815339909 | no |
| ARFGEF2      | -0.022517105 | -0.404784558 | 0.685903813 | 0.815352556 | no |
| NPW          | -0.022503422 | -0.404538455 | 0.686084556 | 0.815494504 | no |
| CD1B         | 0.022502319  | 0.40451863   | 0.686099117 | 0.815494504 | no |
| TUBA1A       | -0.022498263 | -0.404445664 | 0.686152709 | 0.8155131   | no |
| XRN1         | 0.022494544  | 0.404378789  | 0.686201828 | 0.815526377 | no |
| RPS27L       | 0.022491303  | 0.404320494  | 0.686244646 | 0.815532166 | no |
| MAP3K15      | -0.022487881 | -0.404258938 | 0.686289862 | 0.815540803 | no |
| OR11H4       | -0.022481685 | -0.404147499 | 0.68637172  | 0.815588057 | no |
| ZYG11A       | -0.022474346 | -0.404015511 | 0.686468677 | 0.815588057 | no |
| GDPD3        | 0.022472992  | 0.403991157  | 0.686486568 | 0.815588057 | no |
| PFDN5        | -0.022471376 | -0.403962085 | 0.686507925 | 0.815588057 | no |
| RNF40        | 0.022470509  | 0.403946495  | 0.686519378 | 0.815588057 | no |
| LOC100288255 | 0.022453314  | 0.403637224  | 0.686746593 | 0.815812892 | no |
| OR5A1        | -0.022449557 | -0.403569654 | 0.686796239 | 0.815826773 | no |
| SETD1B       | -0.022445621 | -0.403498853 | 0.68684826  | 0.815843473 | no |
| AQPEP        | -0.022402205 | -0.402717984 | 0.687422108 | 0.816479967 | no |
| PRPF4B       | -0.022392551 | -0.402544355 | 0.687549729 | 0.816561834 | no |
| MS4A12       | 0.022391243  | 0.402520824  | 0.687567026 | 0.816561834 | no |
| TRMT112      | 0.022380192  | 0.402322072  | 0.687713126 | 0.816677401 | no |
| AR           | -0.022378134 | -0.402285055 | 0.687740338 | 0.816677401 | no |
| FKSG29       | -0.022371201 | -0.402160366 | 0.687832002 | 0.816734458 | no |
| HMG1         | -0.022368751 | -0.402116305 | 0.687864394 | 0.816734458 | no |
| YBX1         | -0.022358407 | -0.401930259 | 0.688001176 | 0.816851736 | no |
| OVCH1        | -0.022346412 | -0.40171451  | 0.688159809 | 0.816994942 | no |
| CNGA2        | -0.022330905 | -0.40143561  | 0.688364894 | 0.817177916 | no |
| CRYBA2       | 0.022324309  | 0.401316985  | 0.68845213  | 0.817177916 | no |

|              |              |              |             |             |    |
|--------------|--------------|--------------|-------------|-------------|----|
| OR8H1        | 0.022321864  | 0.401273008  | 0.688484472 | 0.817177916 | no |
| KRR1         | 0.022321462  | 0.401265771  | 0.688489794 | 0.817177916 | no |
| SLC25A31     | 0.022320384  | 0.401246389  | 0.688504049 | 0.817177916 | no |
| ZNF75D       | 0.022315516  | 0.401158828  | 0.688568445 | 0.817209214 | no |
| HOXA3        | 0.022303463  | 0.400942056  | 0.688727879 | 0.817353297 | no |
| HTN1         | 0.022289313  | 0.400687562  | 0.688915075 | 0.817491832 | no |
| ZWILCH       | 0.022288889  | 0.400679928  | 0.688920691 | 0.817491832 | no |
| CDK15        | 0.022248584  | 0.399955017  | 0.689454015 | 0.818040558 | no |
| TMPRSS11B    | -0.022248189 | -0.399947909 | 0.689459245 | 0.818040558 | no |
| CLEC1B       | -0.022237006 | -0.399746786 | 0.689607241 | 0.818169786 | no |
| TAAR1        | -0.022234206 | -0.399696425 | 0.689644301 | 0.818169786 | no |
| ZNF195       | -0.022227177 | -0.39957001  | 0.689737331 | 0.818234985 | no |
| PSPN         | -0.022220172 | -0.399444012 | 0.689830059 | 0.818299817 | no |
| SLC35B3      | 0.022207898  | 0.399223268  | 0.689992526 | 0.818447366 | no |
| SRSF10       | -0.022183953 | -0.398792602 | 0.690309538 | 0.818777559 | no |
| CLRN2        | -0.022179456 | -0.398711715 | 0.690369084 | 0.818777559 | no |
| SULT1A2      | -0.022175768 | -0.398645389 | 0.690417913 | 0.818777559 | no |
| ERLIN1       | -0.022175362 | -0.398638085 | 0.69042329  | 0.818777559 | no |
| TAAR8        | -0.022167114 | -0.398489732 | 0.690532511 | 0.818861899 | no |
| ZNF528       | -0.022163745 | -0.398429155 | 0.690577112 | 0.818869604 | no |
| RMDN2        | 0.022157092  | 0.398309485  | 0.690665222 | 0.818919254 | no |
| C12orf60     | -0.022154829 | -0.398268781 | 0.690695193 | 0.818919254 | no |
| MAGEA11      | -0.022151736 | -0.398213156 | 0.690736151 | 0.818922636 | no |
| PTGES3L-AARS | -0.022147923 | -0.398144576 | 0.690786649 | 0.818923368 | no |
| CLPB         | 0.022145935  | 0.398108819  | 0.690812979 | 0.818923368 | no |
| KCNE1L       | -0.022132261 | -0.397862889 | 0.690994081 | 0.819054781 | no |
| PROL1        | -0.022131809 | -0.397854773 | 0.691000058 | 0.819054781 | no |
| RPL35A       | -0.022125593 | -0.397742971 | 0.691082395 | 0.819106429 | no |
| OR4D11       | -0.022122765 | -0.397692102 | 0.691119858 | 0.819106429 | no |
| CDK1         | 0.022115666  | 0.397564431  | 0.691213888 | 0.819172696 | no |
| OR9A2        | 0.022111684  | 0.397492802  | 0.691266645 | 0.819190045 | no |
| BIRC8        | -0.022106474 | -0.397399113 | 0.691335652 | 0.819207643 | no |
| NXNL1        | -0.022104808 | -0.397369137 | 0.691357732 | 0.819207643 | no |
| ENTPD6       | -0.02210156  | -0.397310724 | 0.691400758 | 0.819213457 | no |
| LOC100129935 | 0.022091836  | 0.397135828  | 0.69152959  | 0.819305299 | no |
| GAL3ST2      | 0.022087119  | 0.397050992  | 0.691592084 | 0.819305299 | no |
| CCNY         | 0.022087077  | 0.397050237  | 0.69159264  | 0.819305299 | no |
| KLHL5        | -0.022068921 | -0.396723702 | 0.691833205 | 0.819545112 | no |
| HIST1H2AH    | 0.022060554  | 0.396573209  | 0.691944086 | 0.819605222 | no |
| CPEB1        | -0.022052491 | -0.396428209 | 0.692050927 | 0.819605222 | no |
| KRTAP4-12    | -0.02204928  | -0.396370452 | 0.692093486 | 0.819605222 | no |
| HBD          | 0.022048579  | 0.396357845  | 0.692102776 | 0.819605222 | no |
| CAPZB        | -0.022047439 | -0.396337339 | 0.692117886 | 0.819605222 | no |
| LOC550112    | 0.022045783  | 0.396307559  | 0.69213983  | 0.819605222 | no |
| SNRPA1       | -0.022042798 | -0.396253863 | 0.692179399 | 0.819605222 | no |
| PRR7         | -0.022039514 | -0.396194813 | 0.692222914 | 0.819605222 | no |
| HINT2        | 0.022039192  | 0.39618902   | 0.692227183 | 0.819605222 | no |
| ZNF136       | -0.022021973 | -0.395879323 | 0.69245542  | 0.819716724 | no |
| TFF3         | 0.02201781   | 0.395804453  | 0.6925106   | 0.819716724 | no |
| STK11IP      | 0.02201674   | 0.395785213  | 0.692524781 | 0.819716724 | no |
| RNF24        | 0.022014083  | 0.395737421  | 0.692560006 | 0.819716724 | no |

|              |              |              |             |             |    |
|--------------|--------------|--------------|-------------|-------------|----|
| KLHL38       | 0.022011032  | 0.395682546  | 0.692600452 | 0.819716724 | no |
| TAS2R46      | -0.02200921  | -0.395649786 | 0.692624599 | 0.819716724 | no |
| ENSA         | 0.022009173  | 0.39564911   | 0.692625097 | 0.819716724 | no |
| HBG2         | 0.022009067  | 0.395647215  | 0.692626494 | 0.819716724 | no |
| CIB2         | -0.02200087  | -0.395499775 | 0.692735173 | 0.819779567 | no |
| PAX3         | -0.021999307 | -0.395471677 | 0.692755884 | 0.819779567 | no |
| LOC285593    | 0.021995287  | 0.395399367  | 0.692809187 | 0.819782868 | no |
| LOC100507300 | -0.021993342 | -0.395364398 | 0.692834965 | 0.819782868 | no |
| ANTXR1       | 0.021989717  | 0.395299197  | 0.69288303  | 0.819794604 | no |
| WDR83        | -0.021982681 | -0.39517264  | 0.692976327 | 0.819859854 | no |
| KIAA0556     | 0.021979413  | 0.395113868  | 0.693019656 | 0.819865981 | no |
| OR2T33       | -0.021973026 | -0.394998996 | 0.693104346 | 0.819878957 | no |
| ADM5         | 0.021972831  | 0.3949955    | 0.693106923 | 0.819878957 | no |
| C22orf28     | -0.02196973  | -0.394939726 | 0.693148044 | 0.819882471 | no |
| IFITM5       | -0.021954103 | -0.394658671 | 0.693355274 | 0.820082455 | no |
| MT3          | -0.021950371 | -0.394591546 | 0.693404771 | 0.820095863 | no |
| OR4X1        | -0.021945736 | -0.394508192 | 0.693466236 | 0.820123425 | no |
| PRDM14       | -0.021923127 | -0.394101553 | 0.693766121 | 0.820432934 | no |
| CCDC148-AS1  | -0.02191379  | -0.393933625 | 0.693889978 | 0.820534253 | no |
| RPS18        | -0.021908415 | -0.393836961 | 0.693961277 | 0.820573414 | no |
| WDR36        | 0.021904795  | 0.393771852  | 0.694009303 | 0.820585053 | no |
| OR4K13       | -0.021901882 | -0.393719455 | 0.694047953 | 0.820585605 | no |
| RIPK2        | 0.021888464  | 0.393478141  | 0.694225965 | 0.820750919 | no |
| C19orf33     | 0.021881911  | 0.393360287  | 0.694312909 | 0.820808555 | no |
| HIST1H2AB    | -0.021869182 | -0.393131347 | 0.694481817 | 0.820963076 | no |
| SLC7A5       | 0.021857743  | 0.392925627  | 0.694633607 | 0.821097312 | no |
| LEKR1        | 0.021852662  | 0.39283424   | 0.69470104  | 0.821097312 | no |
| MFS2A        | 0.021851988  | 0.392822109  | 0.694709991 | 0.821097312 | no |
| RAD51D       | -0.02182647  | -0.392363174 | 0.695048672 | 0.821452432 | no |
| RBM24        | 0.02181374   | 0.392134228  | 0.695217651 | 0.821595125 | no |
| SLC25A40     | 0.021810464  | 0.392075295  | 0.69526115  | 0.821595125 | no |
| CKM          | -0.021808735 | -0.392044206 | 0.695284098 | 0.821595125 | no |
| SPHAR        | -0.021761603 | -0.391196545 | 0.695909887 | 0.822289387 | no |
| HOXA7        | 0.021748462  | 0.390960202  | 0.696084405 | 0.822418699 | no |
| LOC100507410 | -0.0217476   | -0.390944689 | 0.69609586  | 0.822418699 | no |
| CLDN17       | -0.021741185 | -0.390829323 | 0.696181054 | 0.822474137 | no |
| LOC149950    | -0.021731001 | -0.390646169 | 0.696316315 | 0.822588717 | no |
| DAAM1        | -0.021701535 | -0.39011622  | 0.696707742 | 0.82295906  | no |
| PEF1         | -0.021699912 | -0.390087026 | 0.696729308 | 0.82295906  | no |
| UBE2H        | -0.021698754 | -0.390066204 | 0.696744688 | 0.82295906  | no |
| PRDM6        | 0.021691769  | 0.389940574  | 0.696837494 | 0.823023444 | no |
| DCDC5        | -0.021672771 | -0.38959891  | 0.697089912 | 0.823276326 | no |
| CETN4P       | -0.021666799 | -0.389491494 | 0.697169276 | 0.823324811 | no |
| SLC34A1      | -0.021661857 | -0.389402619 | 0.697234945 | 0.823357119 | no |
| RGPD1        | -0.021656602 | -0.389308097 | 0.697304788 | 0.823394352 | no |
| NXPE1        | 0.021640207  | 0.389013249  | 0.69752267  | 0.823606379 | no |
| LOC440356    | -0.021616705 | -0.388590567 | 0.697835061 | 0.823929969 | no |
| ABCA5        | -0.021610901 | -0.388486181 | 0.697912217 | 0.823975799 | no |
| WDR54        | 0.021603556  | 0.388354085  | 0.69800986  | 0.824041227 | no |
| SLC25A16     | -0.021600964 | -0.388307463 | 0.698044323 | 0.824041227 | no |
| PDC          | 0.021595186  | 0.388203549  | 0.698121139 | 0.824056876 | no |

|             |              |              |             |             |    |
|-------------|--------------|--------------|-------------|-------------|----|
| CAPRIN1     | 0.021593244  | 0.388168624  | 0.698146957 | 0.824056876 | no |
| C7orf66     | -0.021591315 | -0.38813392  | 0.698172612 | 0.824056876 | no |
| CSN2        | -0.021564912 | -0.387659085 | 0.698523671 | 0.824393977 | no |
| MEIG1       | -0.021564065 | -0.38764385  | 0.698534936 | 0.824393977 | no |
| SCAND3      | -0.021557738 | -0.387530063 | 0.698619072 | 0.824447998 | no |
| C7orf72     | 0.021545561  | 0.387311055  | 0.698781021 | 0.824553849 | no |
| FAM221B     | -0.021545224 | -0.387304994 | 0.698785503 | 0.824553849 | no |
| GPR50       | -0.021532186 | -0.387070518 | 0.698958906 | 0.824713179 | no |
| UGDH-AS1    | -0.021525359 | -0.386947724 | 0.699049722 | 0.82471978  | no |
| INSL6       | 0.021520089  | 0.386852957  | 0.699119813 | 0.82471978  | no |
| FAM166B     | -0.021519132 | -0.386835734 | 0.699132552 | 0.82471978  | no |
| CST9L       | -0.021516795 | -0.386793706 | 0.699163637 | 0.82471978  | no |
| ZNF619      | -0.021515862 | -0.386776928 | 0.699176048 | 0.82471978  | no |
| PRKDC       | -0.021514456 | -0.386751641 | 0.699194751 | 0.82471978  | no |
| MACROD2-AS1 | -0.021507313 | -0.386623169 | 0.699289779 | 0.8247866   | no |
| CHRAC1      | 0.021501299  | 0.386515012  | 0.699369784 | 0.824817021 | no |
| ABRA        | -0.021499604 | -0.386484532 | 0.69939233  | 0.824817021 | no |
| PIK3IP1     | 0.021496104  | 0.386421579  | 0.699438899 | 0.824826678 | no |
| NSG1        | -0.021479443 | -0.386121943 | 0.699660569 | 0.825042814 | no |
| C11orf34    | -0.021463802 | -0.38584064  | 0.699868699 | 0.825193121 | no |
| IFNA1       | 0.021462073  | 0.385809546  | 0.699891706 | 0.825193121 | no |
| EPB41L1     | 0.021461207  | 0.385793978  | 0.699903225 | 0.825193121 | no |
| MROH5       | -0.021456202 | -0.385703956 | 0.699969836 | 0.825226384 | no |
| MSANTD2     | -0.02143832  | -0.385382368 | 0.700207813 | 0.825432273 | no |
| ZNF549      | 0.021437308  | 0.385364155  | 0.700221291 | 0.825432273 | no |
| GIMD1       | -0.021433584 | -0.385297179 | 0.700270858 | 0.825445426 | no |
| HOMEZ       | 0.021428573  | 0.385207059  | 0.700337555 | 0.825478769 | no |
| PGLYRP4     | -0.021415644 | -0.384974546 | 0.700509645 | 0.825552232 | no |
| NSUN4       | 0.021415409  | 0.384970311  | 0.70051278  | 0.825552232 | no |
| RSPO3       | 0.021415233  | 0.384967146  | 0.700515122 | 0.825552232 | no |
| FLJ46066    | -0.021385525 | -0.38443286  | 0.700910624 | 0.825973034 | no |
| C14orf79    | 0.021378493  | 0.3843064    | 0.701004248 | 0.826038068 | no |
| DPPA5       | -0.02137012  | -0.384155807 | 0.701115744 | 0.826124154 | no |
| LOC150185   | -0.021364003 | -0.384045812 | 0.701197186 | 0.82617482  | no |
| CYP2J2      | 0.021350008  | 0.38379412   | 0.701383556 | 0.826307954 | no |
| OR1G1       | 0.021348128  | 0.383760296  | 0.701408602 | 0.826307954 | no |
| PAPD7       | 0.021346857  | 0.383737441  | 0.701425527 | 0.826307954 | no |
| ITPA        | 0.021342416  | 0.383657574  | 0.701484671 | 0.826332332 | no |
| LAMTOR4     | 0.021337257  | 0.383564793  | 0.70155338  | 0.826367974 | no |
| IMPACT      | 0.021329978  | 0.383433882  | 0.701650331 | 0.826436878 | no |
| CD3EAP      | -0.021314264 | -0.383151266 | 0.701859649 | 0.826605465 | no |
| LOC388499   | -0.021313457 | -0.383136767 | 0.701870389 | 0.826605465 | no |
| PPP1R2      | 0.021304402  | 0.382973903  | 0.701991024 | 0.826694115 | no |
| PROSER2     | 0.021302032  | 0.382931282  | 0.702022595 | 0.826694115 | no |
| C22orf15    | 0.021296107  | 0.382824735  | 0.702101522 | 0.826741757 | no |
| ZFAND6      | 0.021292581  | 0.382761316  | 0.702148502 | 0.826751778 | no |
| LGALS13     | -0.021278436 | -0.382506925 | 0.702336963 | 0.826905724 | no |
| GCC2        | -0.021276992 | -0.38248096  | 0.7023562   | 0.826905724 | no |
| PCDHGB4     | -0.021252216 | -0.382035376 | 0.702686351 | 0.827249103 | no |
| SPATA2L     | -0.021248047 | -0.381960393 | 0.702741914 | 0.827269198 | no |
| LOC286190   | -0.021235882 | -0.381741621 | 0.702904036 | 0.827414726 | no |

|              |              |              |             |             |    |
|--------------|--------------|--------------|-------------|-------------|----|
| NOC2L        | -0.021218731 | -0.381433173 | 0.703132637 | 0.827599324 | no |
| C8orf74      | -0.021215894 | -0.381382156 | 0.70317045  | 0.827599324 | no |
| COX14        | -0.02121318  | -0.38133333  | 0.703206639 | 0.827599324 | no |
| FAM170B      | -0.02121256  | -0.381322194 | 0.703214893 | 0.827599324 | no |
| GPR15        | -0.021205807 | -0.381200743 | 0.703304915 | 0.827659946 | no |
| FAM205A      | -0.021193082 | -0.380971886 | 0.703474561 | 0.827814257 | no |
| LINC00474    | -0.021188657 | -0.380892305 | 0.703533555 | 0.827836189 | no |
| R3HDM4       | 0.021185905  | 0.380842823  | 0.703570238 | 0.827836189 | no |
| FGF2         | 0.021176827  | 0.380679561  | 0.703691275 | 0.827917471 | no |
| WT1-AS       | 0.021174945  | 0.380645717  | 0.703716367 | 0.827917471 | no |
| CARD10       | -0.021163781 | -0.380444927 | 0.703865237 | 0.828047286 | no |
| GOLGA6A      | -0.021149039 | -0.380179814 | 0.704061816 | 0.828227899 | no |
| SLC6A14      | 0.021146488  | 0.38013393   | 0.704095841 | 0.828227899 | no |
| GH1          | -0.021130566 | -0.379847592 | 0.704308184 | 0.828432335 | no |
| ZNF776       | 0.021112529  | 0.379523196  | 0.704548779 | 0.828669976 | no |
| FBX036       | 0.0211039    | 0.37936801   | 0.704663885 | 0.828714068 | no |
| VPREB1       | -0.021101462 | -0.379324163 | 0.704696409 | 0.828714068 | no |
| POLN         | 0.021100573  | 0.379308175  | 0.704708269 | 0.828714068 | no |
| DUOXA1       | -0.021098156 | -0.37926471  | 0.704740511 | 0.828714068 | no |
| FAM177A1     | 0.021071226  | 0.378780398  | 0.7050998   | 0.829091197 | no |
| LCT          | -0.021058101 | -0.378544359 | 0.705274931 | 0.829251753 | no |
| PTOV1-AS1    | 0.021041931  | 0.378253563  | 0.705490711 | 0.82943315  | no |
| KIAA1009     | 0.021040756  | 0.378232424  | 0.705506397 | 0.82943315  | no |
| CFHR1        | -0.021026472 | -0.377975544 | 0.705697032 | 0.829611887 | no |
| KRTAP12-1    | -0.021005247 | -0.377593819 | 0.705980349 | 0.829832506 | no |
| C11orf82     | 0.021002838  | 0.377550502  | 0.706012502 | 0.829832506 | no |
| MEF2D        | 0.020998387  | 0.377470457  | 0.706071918 | 0.829832506 | no |
| LGR6         | -0.020998147 | -0.377466137 | 0.706075125 | 0.829832506 | no |
| RNU5E-1      | -0.020997949 | -0.377462582 | 0.706077763 | 0.829832506 | no |
| FANCC        | 0.020970217  | 0.376963852  | 0.706448003 | 0.830222236 | no |
| LIP1         | -0.02096496  | -0.376869297 | 0.706518205 | 0.830259336 | no |
| LOC100129550 | 0.020950914  | 0.376616689  | 0.706705766 | 0.830434338 | no |
| RAET1L       | 0.020932348  | 0.376282814  | 0.706953695 | 0.830680254 | no |
| USP42        | -0.020921778 | -0.376092707 | 0.707094878 | 0.830800723 | no |
| OR51S1       | -0.020913029 | -0.375935375 | 0.707211728 | 0.830892589 | no |
| DTWD2        | 0.020900378  | 0.375707849  | 0.707380724 | 0.831045708 | no |
| LHCGR        | 0.020895151  | 0.375613855  | 0.707450543 | 0.831082301 | no |
| SERHL        | -0.020891202 | -0.375542831 | 0.707503302 | 0.83109885  | no |
| RNF41        | -0.020886746 | -0.375462705 | 0.707562822 | 0.831123339 | no |
| DECR2        | -0.020879923 | -0.375339991 | 0.707653983 | 0.831184989 | no |
| COQ4         | 0.020869054  | 0.375144529  | 0.707799195 | 0.831272665 | no |
| APOC3        | 0.020868546  | 0.375135385  | 0.707805989 | 0.831272665 | no |
| ZMYM5        | -0.020857472 | -0.374936243 | 0.707953946 | 0.831400997 | no |
| RNF168       | -0.020849464 | -0.374792218 | 0.70806096  | 0.831481236 | no |
| SPAG6        | -0.020824111 | -0.374336278 | 0.708399771 | 0.831763796 | no |
| DTL          | -0.020822906 | -0.374314602 | 0.708415881 | 0.831763796 | no |
| FGF5         | 0.020822655  | 0.374310092  | 0.708419233 | 0.831763796 | no |
| OR8G1        | -0.020819875 | -0.374260094 | 0.70845639  | 0.831763796 | no |
| LIN7A        | 0.020809907  | 0.374080835  | 0.708589618 | 0.831874767 | no |
| KIF24        | 0.02079942   | 0.373892236  | 0.708729798 | 0.831969639 | no |
| LAMTOR5      | 0.020798069  | 0.373867942  | 0.708747855 | 0.831969639 | no |



|            |              |              |             |             |    |
|------------|--------------|--------------|-------------|-------------|----|
| DLGAP1-AS5 | -0.020793046 | -0.373777599 | 0.708815008 | 0.832003023 | no |
| OR4F13P    | 0.020788955  | 0.373704026  | 0.708869698 | 0.832021774 | no |
| CNTD2      | -0.020785432 | -0.373640687 | 0.708916781 | 0.832031595 | no |
| PLA2G1B    | 0.020780436  | 0.373550824  | 0.708983583 | 0.832064558 | no |
| TAF1A      | -0.020776136 | -0.373473492 | 0.709041072 | 0.832069993 | no |
| ZFP106     | 0.020774297  | 0.373440433  | 0.709065649 | 0.832069993 | no |
| AVP        | 0.020767693  | 0.373321663  | 0.709153946 | 0.832122837 | no |
| SPANXN5    | 0.020765137  | 0.373275698  | 0.70918812  | 0.832122837 | no |
| OR2W1      | -0.020749501 | -0.372994498 | 0.709397192 | 0.832322709 | no |
| GNPTG      | -0.020721313 | -0.37248758  | 0.709774144 | 0.832719518 | no |
| GPC6-AS2   | 0.020703619  | 0.37216936   | 0.710010813 | 0.832951711 | no |
| SEMG1      | 0.020697896  | 0.372066442  | 0.710087362 | 0.832960513 | no |
| PROK1      | 0.020695378  | 0.37202117   | 0.710121036 | 0.832960513 | no |
| HDGF       | 0.020694365  | 0.372002945  | 0.710134592 | 0.832960513 | no |
| KIAA1024L  | 0.020686361  | 0.371859004  | 0.710241661 | 0.833040634 | no |
| COMMD2     | -0.020681215 | -0.371766469 | 0.710310495 | 0.833065059 | no |
| TMEM219    | 0.020676579  | 0.371683085  | 0.710372524 | 0.833065059 | no |
| C3P1       | -0.020672335 | -0.371606767 | 0.710429298 | 0.833065059 | no |
| C8orf76    | 0.020671824  | 0.371597576  | 0.710436136 | 0.833065059 | no |
| OR5M9      | 0.020670317  | 0.371570467  | 0.710456303 | 0.833065059 | no |
| CKAP2      | -0.020663964 | -0.371456219 | 0.710541298 | 0.833074744 | no |
| TBC1D2     | -0.020663905 | -0.371455156 | 0.71054209  | 0.833074744 | no |
| ZNF599     | -0.020651625 | -0.371234326 | 0.710706387 | 0.833221917 | no |
| MTUS1      | -0.020629902 | -0.370843664 | 0.710997074 | 0.833517244 | no |
| OR6B2      | -0.020625453 | -0.370763651 | 0.711056615 | 0.833541576 | no |
| ESCO1      | -0.020600012 | -0.370306132 | 0.711397112 | 0.83389524  | no |
| BCAR3      | -0.020589728 | -0.370121185 | 0.711534771 | 0.834011113 | no |
| SNX21      | -0.020566421 | -0.369702034 | 0.711846786 | 0.83433133  | no |
| LRR1Q4     | -0.020562555 | -0.369632522 | 0.711898535 | 0.834332164 | no |
| SLC17A2    | 0.020560568  | 0.369596783  | 0.711925142 | 0.834332164 | no |
| MCIN       | 0.020555191  | 0.369500084  | 0.711997135 | 0.834371036 | no |
| ABCB1      | -0.020546979 | -0.369352406 | 0.712107086 | 0.834454382 | no |
| GP2        | -0.020524672 | -0.368951249 | 0.71240579  | 0.834758892 | no |
| FAM27A     | -0.020518895 | -0.368847347 | 0.712483163 | 0.834804038 | no |
| TYW3       | -0.02051556  | -0.368787378 | 0.712527822 | 0.83481085  | no |
| DEFB114    | 0.020505862  | 0.368612969  | 0.71265771  | 0.834826575 | no |
| C3orf30    | -0.020505683 | -0.368609753 | 0.712660105 | 0.834826575 | no |
| KRT42P     | -0.020503409 | -0.368568867 | 0.712690555 | 0.834826575 | no |
| LINC00167  | -0.020501929 | -0.368542249 | 0.71271038  | 0.834826575 | no |
| LRIT1      | -0.020500056 | -0.36850856  | 0.712735471 | 0.834826575 | no |
| MIR1307    | -0.020497115 | -0.368455676 | 0.712774859 | 0.83482721  | no |
| LEPR       | -0.02048902  | -0.368310094 | 0.712883291 | 0.834892725 | no |
| KPNA1      | 0.020487138  | 0.36827626   | 0.712908491 | 0.834892725 | no |
| PRSS41     | -0.020483098 | -0.368203599 | 0.712962613 | 0.83491061  | no |
| CROT       | 0.020455247  | 0.367702732  | 0.713335728 | 0.835248345 | no |
| LOC441009  | -0.020452894 | -0.367660417 | 0.713367253 | 0.835248345 | no |
| GTSE1      | -0.020452493 | -0.367653219 | 0.713372616 | 0.835248345 | no |
| C1orf159   | -0.020449966 | -0.367607768 | 0.713406478 | 0.835248345 | no |
| CCDC130    | -0.020440311 | -0.367434141 | 0.71353584  | 0.835354292 | no |
| AGBL2      | 0.020434052  | 0.367321576  | 0.713619711 | 0.835387729 | no |
| FAM104A    | 0.020432378  | 0.36729147   | 0.713642144 | 0.835387729 | no |

|              |              |              |             |             |    |
|--------------|--------------|--------------|-------------|-------------|----|
| C11orf40     | -0.020426877 | -0.367192551 | 0.713715852 | 0.835428506 | no |
| RNU6-19      | -0.020420093 | -0.367070552 | 0.713806761 | 0.835460547 | no |
| TLR8-AS1     | 0.020419032  | 0.367051477  | 0.713820975 | 0.835460547 | no |
| DLEU2        | -0.020403795 | -0.36677745  | 0.714025186 | 0.835654048 | no |
| DPPA4        | 0.020377163  | 0.366298521  | 0.714382144 | 0.835972839 | no |
| WFS1         | 0.020376258  | 0.366282244  | 0.714394277 | 0.835972839 | no |
| COX7A1       | -0.020374766 | -0.366255417 | 0.714414274 | 0.835972839 | no |
| KRT2         | -0.020358419 | -0.365961434 | 0.714633421 | 0.836183746 | no |
| IDI2-AS1     | -0.02033412  | -0.36552447  | 0.714959197 | 0.836447986 | no |
| TSEN15       | 0.020331175  | 0.365471499  | 0.714998692 | 0.836447986 | no |
| ZFY          | -0.020330782 | -0.365464442 | 0.715003954 | 0.836447986 | no |
| LOC100507194 | 0.020329964  | 0.365449716  | 0.715014934 | 0.836447986 | no |
| LOC100507244 | 0.020325035  | 0.36536109   | 0.715081017 | 0.836479759 | no |
| OR2T27       | -0.020317576 | -0.365226954 | 0.715181038 | 0.836551227 | no |
| SLC26A7      | -0.020294044 | -0.364803757 | 0.715496633 | 0.836786588 | no |
| SNORA1       | 0.020291675  | 0.364761161  | 0.715528402 | 0.836786588 | no |
| RMDN1        | 0.020287705  | 0.364689768  | 0.715581648 | 0.836786588 | no |
| FAM132A      | -0.020286384 | -0.364666002 | 0.715599373 | 0.836786588 | no |
| C6orf99      | -0.020284107 | -0.364625066 | 0.715629906 | 0.836786588 | no |
| FTLP10       | -0.020282603 | -0.36459802  | 0.715650077 | 0.836786588 | no |
| PDS5A        | 0.020281225  | 0.364573226  | 0.71566857  | 0.836786588 | no |
| DCAF4L1      | -0.020279348 | -0.364539473 | 0.715693745 | 0.836786588 | no |
| SLC25A3P1    | -0.020262868 | -0.364243114 | 0.715914803 | 0.836968553 | no |
| PDZD11       | -0.020261528 | -0.36421901  | 0.715932784 | 0.836968553 | no |
| LINC00242    | 0.020259036  | 0.364174197  | 0.715966213 | 0.836968553 | no |
| SEL1L2       | 0.020239465  | 0.363822247  | 0.716228774 | 0.837229947 | no |
| HIST1H2BB    | -0.02023047  | -0.3636605   | 0.716349452 | 0.837325469 | no |
| KCTD5        | -0.02022668  | -0.363592338 | 0.716400309 | 0.837339372 | no |
| HLTF-AS1     | -0.020219286 | -0.363459377 | 0.716499518 | 0.837372139 | no |
| PHPT1        | -0.020216477 | -0.363408853 | 0.716537217 | 0.837372139 | no |
| PLGLA        | -0.020215879 | -0.363398108 | 0.716545235 | 0.837372139 | no |
| ERN2         | -0.020195611 | -0.363033625 | 0.716817223 | 0.837644443 | no |
| WNT1         | -0.020182834 | -0.362803848 | 0.716988709 | 0.83779928  | no |
| ZNF354B      | 0.020178501  | 0.362725921  | 0.71704687  | 0.837821687 | no |
| SERPIND1     | -0.020172111 | -0.362611016 | 0.717132633 | 0.837876341 | no |
| TACC2        | -0.020160637 | -0.36240467  | 0.717286655 | 0.837933614 | no |
| RAP2C        | 0.020160555  | 0.362403202  | 0.71728775  | 0.837933614 | no |
| EFTUD1       | 0.020159745  | 0.362388637  | 0.717298623 | 0.837933614 | no |
| RTTN         | 0.020153127  | 0.362269622  | 0.717387464 | 0.8379747   | no |
| CYP26C1      | -0.020146711 | -0.362154244 | 0.717473595 | 0.8379747   | no |
| LOC100506082 | 0.020146361  | 0.362147952  | 0.717478292 | 0.8379747   | no |
| AP1M1        | 0.020142302  | 0.36207495   | 0.717532789 | 0.8379747   | no |
| PCDHGA2      | -0.020140111 | -0.36203556  | 0.717562196 | 0.8379747   | no |
| MCHR1        | 0.020139698  | 0.362028128  | 0.717567745 | 0.8379747   | no |
| ADSL         | -0.020112767 | -0.361543829 | 0.717929332 | 0.838332064 | no |
| RNF7         | 0.020111096  | 0.361513769  | 0.717951777 | 0.838332064 | no |
| FAM118A      | 0.020107576  | 0.361450471  | 0.717999042 | 0.838341704 | no |
| FIG4         | -0.020103566 | -0.361378366 | 0.718052884 | 0.838353643 | no |
| ZNF645       | 0.020100113  | 0.36131627   | 0.718099253 | 0.838353643 | no |
| FAM162A      | -0.0200981   | -0.361280057 | 0.718126296 | 0.838353643 | no |
| DLX4         | -0.020089009 | -0.36111657  | 0.718248384 | 0.838413888 | no |

|              |              |              |             |             |    |
|--------------|--------------|--------------|-------------|-------------|----|
| GRHL2        | -0.020088447 | -0.361106473 | 0.718255925 | 0.838413888 | no |
| NOM01        | -0.02008552  | -0.361053843 | 0.718295229 | 0.838414228 | no |
| BLID         | 0.020073654  | 0.36084044   | 0.718454609 | 0.838504664 | no |
| RPL7L1       | -0.020072461 | -0.36081899  | 0.71847063  | 0.838504664 | no |
| MEA1         | -0.020071037 | -0.360793378 | 0.718489758 | 0.838504664 | no |
| THAP9-AS1    | -0.020065147 | -0.360687467 | 0.718568864 | 0.838551447 | no |
| AA06         | -0.020059984 | -0.360594627 | 0.718638209 | 0.838586835 | no |
| CLEC3A       | -0.020056295 | -0.360528271 | 0.718687773 | 0.838599139 | no |
| SRA1         | -0.020047269 | -0.36036596  | 0.718809017 | 0.838695074 | no |
| PPP1R14A     | -0.020036239 | -0.360167614 | 0.718957187 | 0.838822416 | no |
| ASUN         | -0.02002223  | -0.359915692 | 0.719145396 | 0.838996455 | no |
| ZNHIT6       | -0.020016655 | -0.359815424 | 0.71922031  | 0.839027596 | no |
| SASS6        | -0.020014432 | -0.359775459 | 0.71925017  | 0.839027596 | no |
| PPP1R3A      | 0.02001093   | 0.359712481  | 0.719297226 | 0.839036945 | no |
| INVS         | 0.020007871  | 0.359657466  | 0.719338332 | 0.839039354 | no |
| KRT84        | -0.019999685 | -0.359510255 | 0.71944833  | 0.839122114 | no |
| ZPBP         | -0.019985884 | -0.359262074 | 0.719633788 | 0.839292871 | no |
| DDIT4        | 0.019974486  | 0.359057107  | 0.719786966 | 0.839411138 | no |
| RC3H1        | 0.019972526  | 0.359021857  | 0.719813311 | 0.839411138 | no |
| OPN4         | 0.019967239  | 0.358926783  | 0.719884367 | 0.83944845  | no |
| LOC730668    | -0.019959327 | -0.358784505 | 0.719990707 | 0.839500339 | no |
| DLK1         | -0.019956776 | -0.358738635 | 0.720024992 | 0.839500339 | no |
| RSPH10B      | -0.019955209 | -0.358710456 | 0.720046054 | 0.839500339 | no |
| HOXA6        | -0.019916688 | -0.358017723 | 0.720563901 | 0.840049729 | no |
| C19orf54     | 0.019914341  | 0.357975529  | 0.720595447 | 0.840049729 | no |
| C21orf54     | -0.019902716 | -0.357766481 | 0.720751747 | 0.840139474 | no |
| TRDMT1       | -0.019902243 | -0.357757975 | 0.720758107 | 0.840139474 | no |
| FCRLA        | 0.019899893  | 0.357715711  | 0.720789709 | 0.840139474 | no |
| KDM5B-AS1    | -0.019892896 | -0.35758988  | 0.720883796 | 0.840203572 | no |
| TAS2R9       | 0.019881209  | 0.357379716  | 0.721040953 | 0.840341167 | no |
| WIPI2        | 0.019871049  | 0.357197006  | 0.721177589 | 0.840454833 | no |
| TEX37        | -0.01986315  | -0.357054957 | 0.721283824 | 0.840533059 | no |
| LOC100616530 | -0.019856257 | -0.356931    | 0.721376533 | 0.840595514 | no |
| DHH          | -0.019844998 | -0.356728535 | 0.721527967 | 0.840618043 | no |
| LOC100505624 | -0.019844    | -0.356710586 | 0.721541393 | 0.840618043 | no |
| LOC100499194 | -0.019843206 | -0.356696315 | 0.721552068 | 0.840618043 | no |
| TMEM191B     | 0.019843187  | 0.356695969  | 0.721552326 | 0.840618043 | no |
| CALML3       | -0.019824456 | -0.356359145 | 0.721804282 | 0.840851705 | no |
| RNF13        | 0.01982246   | 0.356323239  | 0.721831143 | 0.840851705 | no |
| MORF4L1      | -0.019806105 | -0.356029134 | 0.722051171 | 0.841062424 | no |
| ADCY10       | -0.019792461 | -0.35578378  | 0.722234745 | 0.841160658 | no |
| LINC00548    | 0.019790517  | 0.355748816  | 0.722260907 | 0.841160658 | no |
| APPL2        | -0.019790217 | -0.355743418 | 0.722264946 | 0.841160658 | no |
| IL4          | 0.019788201  | 0.355707173  | 0.722292066 | 0.841160658 | no |
| MUC13        | 0.019773708  | 0.355446539  | 0.722487096 | 0.841342193 | no |
| SHB          | 0.019755491  | 0.355118947  | 0.722732255 | 0.841582081 | no |
| FAM205B      | -0.019747529 | -0.354975769 | 0.722839413 | 0.841661258 | no |
| OR52K1       | 0.019739663  | 0.354834317  | 0.722945286 | 0.841738929 | no |
| NUDCD1       | 0.019732765  | 0.354710285  | 0.723038124 | 0.841801415 | no |
| SURF1        | -0.019724172 | -0.35455576  | 0.723153793 | 0.841890475 | no |
| TMEM63B      | -0.01970294  | -0.354173941 | 0.723439627 | 0.842094052 | no |

|              |              |              |             |             |    |
|--------------|--------------|--------------|-------------|-------------|----|
| RHD          | -0.019697019 | -0.354067471 | 0.723519338 | 0.842094052 | no |
| ASB7         | 0.01969698   | 0.354066767  | 0.723519865 | 0.842094052 | no |
| POM121       | -0.019696826 | -0.354063994 | 0.723521942 | 0.842094052 | no |
| RGMA         | -0.01969663  | -0.354060475 | 0.723524576 | 0.842094052 | no |
| TNFAIP1      | 0.019691203  | 0.35396289   | 0.723597638 | 0.84213348  | no |
| ITGB1BP1     | -0.019687071 | -0.353888571 | 0.723653283 | 0.842152635 | no |
| PRR9         | -0.019675615 | -0.353682569 | 0.723807531 | 0.842247521 | no |
| TCOF1        | -0.019675194 | -0.353674999 | 0.723813199 | 0.842247521 | no |
| NRTN         | -0.019659223 | -0.353387799 | 0.724028264 | 0.842452161 | no |
| CFHR5        | -0.019652453 | -0.353266051 | 0.724119439 | 0.84247322  | no |
| SLC22A20     | -0.019648845 | -0.353201171 | 0.724168029 | 0.84247322  | no |
| OR4C12       | 0.019647508  | 0.353177129  | 0.724186035 | 0.84247322  | no |
| AURKA        | 0.019644428  | 0.353121746  | 0.724227513 | 0.84247322  | no |
| SPATA31D1    | -0.019643325 | -0.353101911 | 0.724242369 | 0.84247322  | no |
| SYNDIG1      | -0.019638395 | -0.353013265 | 0.72430876  | 0.842504848 | no |
| SNORA11B     | 0.0196202    | 0.352686059  | 0.724553842 | 0.842744311 | no |
| FLJ31813     | -0.019607371 | -0.352455357 | 0.724726659 | 0.842899698 | no |
| CAD          | -0.01957815  | -0.351929894 | 0.725120329 | 0.843311921 | no |
| POLA2        | 0.019569946  | 0.351782359  | 0.725230873 | 0.843394843 | no |
| MPI          | -0.019565454 | -0.351701588 | 0.725291396 | 0.843419587 | no |
| SRPX         | -0.019558735 | -0.351580773 | 0.725381927 | 0.843479222 | no |
| GHRLOS2      | -0.019548403 | -0.351394966 | 0.725521166 | 0.843509399 | no |
| LOC100134229 | -0.019548122 | -0.351389921 | 0.725524946 | 0.843509399 | no |
| GPR156       | 0.019546135  | 0.351354192  | 0.725551722 | 0.843509399 | no |
| PCDHGA3      | -0.019545159 | -0.351336639 | 0.725564876 | 0.843509399 | no |
| ATP1A1OS     | 0.019527116  | 0.351012175  | 0.725808048 | 0.843746458 | no |
| CCNT2        | 0.019507044  | 0.350651236  | 0.726078589 | 0.843994866 | no |
| PAQR5        | 0.019505435  | 0.350622302  | 0.726100278 | 0.843994866 | no |
| NR2C2AP      | 0.019501874  | 0.350558258  | 0.726148286 | 0.84400502  | no |
| EPO          | 0.019488222  | 0.350312769  | 0.726332318 | 0.84412416  | no |
| TYR          | -0.019487997 | -0.350308726 | 0.726335348 | 0.84412416  | no |
| ANGPTL1      | 0.019481931  | 0.350199644  | 0.726417127 | 0.84412416  | no |
| SLC16A1      | -0.019479238 | -0.350151205 | 0.726453443 | 0.84412416  | no |
| CYP7A1       | 0.019479099  | 0.350148709  | 0.726455314 | 0.84412416  | no |
| BMP15        | -0.019471991 | -0.350020892 | 0.726551145 | 0.84412416  | no |
| STXBP4       | 0.01947026   | 0.349989766  | 0.726574482 | 0.84412416  | no |
| GGTA1P       | -0.01946814  | -0.349951646 | 0.726603063 | 0.84412416  | no |
| FKBP1AP1     | -0.019464052 | -0.349878128 | 0.726658186 | 0.84412416  | no |
| LOC284801    | -0.019462822 | -0.349856018 | 0.726674764 | 0.84412416  | no |
| FAM83D       | 0.019462223  | 0.349845236  | 0.726682848 | 0.84412416  | no |
| RBBP9        | -0.019454514 | -0.349706613 | 0.726786791 | 0.844199272 | no |
| RBMXL3       | -0.019447379 | -0.349578307 | 0.726883003 | 0.844265396 | no |
| EQTN         | -0.019439858 | -0.349443073 | 0.726984414 | 0.844301718 | no |
| KRTAP20-3    | 0.019439233  | 0.349431828  | 0.726992847 | 0.844301718 | no |
| PPP5C        | -0.019418813 | -0.349064628 | 0.727268234 | 0.844532201 | no |
| FAM209B      | 0.01941869   | 0.349062406  | 0.727269901 | 0.844532201 | no |
| FAM83C       | -0.019415043 | -0.348996826 | 0.727319087 | 0.844543684 | no |
| C6orf222     | -0.019399135 | -0.348710761 | 0.727533655 | 0.844747192 | no |
| MLK7-AS1     | -0.019396192 | -0.34865784  | 0.727573352 | 0.844747645 | no |
| CLDN19       | -0.019390494 | -0.348555392 | 0.727650201 | 0.8447527   | no |
| MDH1B        | 0.019390041  | 0.348547235  | 0.72765632  | 0.8447527   | no |

|              |              |              |             |             |    |
|--------------|--------------|--------------|-------------|-------------|----|
| ALAS1        | -0.019380601 | -0.348377486 | 0.727783661 | 0.844794251 | no |
| LOC100287944 | -0.019377644 | -0.348324304 | 0.727823558 | 0.844794251 | no |
| TPI1         | 0.019376478  | 0.348303345  | 0.727839281 | 0.844794251 | no |
| RLN2         | 0.019375732  | 0.348289926  | 0.727849349 | 0.844794251 | no |
| HBA2         | 0.019360522  | 0.348016409  | 0.728054555 | 0.844943609 | no |
| OR10C1       | -0.019360365 | -0.348013599 | 0.728056664 | 0.844943609 | no |
| LOC100130015 | 0.019349671  | 0.347821297  | 0.72820095  | 0.845065426 | no |
| SYCE3        | 0.019336664  | 0.347587394  | 0.728376464 | 0.845148703 | no |
| C19orf6      | 0.019336583  | 0.347585934  | 0.728377559 | 0.845148703 | no |
| TRIM54       | 0.019330365  | 0.34747413   | 0.728461459 | 0.845148703 | no |
| GRM5-AS1     | -0.019328319 | -0.347437336 | 0.72848907  | 0.845148703 | no |
| ST3GAL3      | 0.019327532  | 0.347423181  | 0.728499693 | 0.845148703 | no |
| OCM2         | -0.019326867 | -0.347411225 | 0.728508665 | 0.845148703 | no |
| GOLGA8B      | 0.019316403  | 0.347223058  | 0.728649879 | 0.845266898 | no |
| KIAA1377     | -0.019312702 | -0.347156499 | 0.728699831 | 0.845276695 | no |
| OR7E5P       | -0.019309949 | -0.347106991 | 0.728736988 | 0.845276695 | no |
| LOC494127    | -0.019293086 | -0.346803765 | 0.728964579 | 0.845423127 | no |
| KIF2B        | -0.019292046 | -0.346785071 | 0.728978611 | 0.845423127 | no |
| RAB22A       | -0.01928459  | -0.346650994 | 0.729079253 | 0.845423127 | no |
| OR5J2        | -0.019283344 | -0.346628588 | 0.729096072 | 0.845423127 | no |
| FXD4         | -0.019283314 | -0.346628039 | 0.729096484 | 0.845423127 | no |
| OR1D4        | 0.019281929  | 0.346603137  | 0.729115177 | 0.845423127 | no |
| LOC100130700 | -0.019280194 | -0.346571933 | 0.7291386   | 0.845423127 | no |
| SRD5A2       | -0.019262234 | -0.346248976 | 0.729381046 | 0.845658614 | no |
| ABCD2        | -0.019251473 | -0.346055475 | 0.729526322 | 0.84578142  | no |
| IRX1         | -0.01921945  | -0.345479619 | 0.729958717 | 0.846202779 | no |
| FAM32A       | 0.019218724  | 0.345466574  | 0.729968513 | 0.846202779 | no |
| ZNF511       | -0.019207996 | -0.345273666 | 0.730113383 | 0.846243513 | no |
| TAS2R41      | -0.019207419 | -0.345263286 | 0.730121178 | 0.846243513 | no |
| AQP10        | -0.019207374 | -0.345262482 | 0.730121782 | 0.846243513 | no |
| DTWD1        | -0.019203902 | -0.345200042 | 0.730168676 | 0.846252225 | no |
| GLT6D1       | -0.019194644 | -0.345033558 | 0.730293712 | 0.846351497 | no |
| AGXT         | -0.019181923 | -0.344804805 | 0.730465528 | 0.846499009 | no |
| SERPINB11    | -0.019178104 | -0.344736136 | 0.730517107 | 0.846499009 | no |
| XIRP1        | 0.019174214  | 0.34466618   | 0.730569655 | 0.846499009 | no |
| LINC00477    | 0.019173555  | 0.344654338  | 0.73057855  | 0.846499009 | no |
| SCN11A       | -0.019161025 | -0.34442903  | 0.7307478   | 0.846649467 | no |
| DAK          | -0.019153495 | -0.344293613 | 0.730849531 | 0.846682983 | no |
| ENDOU        | 0.019151913  | 0.344265173  | 0.730870897 | 0.846682983 | no |
| MACF1        | -0.019150135 | -0.344233197 | 0.730894919 | 0.846682983 | no |
| RTP1         | 0.019146609  | 0.344169793  | 0.730942553 | 0.846692525 | no |
| LYRM5        | -0.019141796 | -0.344083247 | 0.731007575 | 0.846722205 | no |
| KIAA1524     | 0.019138545  | 0.344024791  | 0.731051494 | 0.846727441 | no |
| SPATC1L      | -0.019128465 | -0.343843517 | 0.731187695 | 0.846839553 | no |
| DEFA4        | 0.019115788  | 0.343615568  | 0.731358976 | 0.846992281 | no |
| KRTAP10-1    | 0.019111335  | 0.343535498  | 0.731419145 | 0.847013653 | no |
| ZNF772       | -0.019108589 | -0.343486112 | 0.731456256 | 0.847013653 | no |
| KRTAP25-1    | 0.019103506  | 0.343394717  | 0.731524937 | 0.847039358 | no |
| CCDC87       | -0.019100844 | -0.343346835 | 0.73156092  | 0.847039358 | no |
| MEF2BNB      | -0.019098196 | -0.343299232 | 0.731596695 | 0.847039358 | no |
| FLJ40288     | -0.019095009 | -0.343241916 | 0.731639769 | 0.847043596 | no |

|           |              |              |             |             |    |
|-----------|--------------|--------------|-------------|-------------|----|
| MIR182    | -0.019087264 | -0.343102638 | 0.731744443 | 0.847093886 | no |
| SF3B4     | 0.019085961  | 0.343079225  | 0.73176204  | 0.847093886 | no |
| TEX2      | 0.019080164  | 0.342974978  | 0.73184039  | 0.847138954 | no |
| PIN4      | -0.019069373 | -0.342780921 | 0.731986247 | 0.847235499 | no |
| FANCI     | 0.01906816   | 0.342759112  | 0.732002641 | 0.847235499 | no |
| GLYATL2   | 0.019049485  | 0.342423305  | 0.732255066 | 0.84748202  | no |
| LOC286135 | -0.019036657 | -0.342192626 | 0.732428484 | 0.847637079 | no |
| FASTKD1   | -0.019028381 | -0.342043805 | 0.73254037  | 0.847685688 | no |
| OR4K5     | -0.019027715 | -0.34203183  | 0.732549374 | 0.847685688 | no |
| GMCL1P1   | 0.019024195  | 0.341968542  | 0.732596957 | 0.847695106 | no |
| LYPD2     | -0.019014499 | -0.341794192 | 0.732728047 | 0.847787698 | no |
| TJP3      | -0.019012441 | -0.341757184 | 0.732755874 | 0.847787698 | no |
| NXPH4     | -0.019006544 | -0.341651142 | 0.73283561  | 0.847824087 | no |
| LOC284661 | 0.019001038  | 0.341552137  | 0.732910057 | 0.847824087 | no |
| LOC400684 | 0.019000944  | 0.341550447  | 0.732911327 | 0.847824087 | no |
| C16orf78  | -0.018998445 | -0.3415055   | 0.732945127 | 0.847824087 | no |
| NGLY1     | 0.018995202  | 0.341447186  | 0.732988978 | 0.847829178 | no |
| TAS1R2    | -0.018987165 | -0.341302675 | 0.733097651 | 0.847909242 | no |
| OR6N2     | 0.018967675  | 0.340952204  | 0.733361232 | 0.848168455 | no |
| PHYHD1    | -0.018964208 | -0.340889865 | 0.733408119 | 0.848177038 | no |
| SIX2      | -0.018960526 | -0.340823644 | 0.733457927 | 0.848188996 | no |
| DBNL      | 0.018957261  | 0.340764944  | 0.733502079 | 0.848191118 | no |
| CITED1    | 0.018952143  | 0.340672903  | 0.73357131  | 0.848191118 | no |
| PMS2P3    | -0.018951636 | -0.340663792 | 0.733578163 | 0.848191118 | no |
| ACSM2A    | -0.018940807 | -0.340469072 | 0.733724636 | 0.848314835 | no |
| TSTD1     | 0.018935997  | 0.340382574  | 0.733789704 | 0.848318536 | no |
| RRAS2     | 0.018934735  | 0.340359871  | 0.733806783 | 0.848318536 | no |
| OR7E24    | -0.018924946 | -0.34018386  | 0.733939195 | 0.848425972 | no |
| CST11     | -0.018921917 | -0.340129384 | 0.733980179 | 0.848427712 | no |
| POC5      | -0.018918101 | -0.340060771 | 0.734031799 | 0.848441746 | no |
| MYOCD     | 0.018899294  | 0.339722576  | 0.734286255 | 0.848690217 | no |
| MBNL2     | -0.018890473 | -0.339563971 | 0.734405598 | 0.848782506 | no |
| NCR1      | -0.018878254 | -0.339344252 | 0.734570937 | 0.848897347 | no |
| SYT14     | 0.018877292  | 0.339326943  | 0.734583963 | 0.848897347 | no |
| C2orf54   | -0.018870372 | -0.339202516 | 0.734677601 | 0.848959905 | no |
| GHSR      | -0.018860257 | -0.339020635 | 0.734814484 | 0.849072427 | no |
| TBC1D20   | 0.018845019  | 0.338746619  | 0.735020722 | 0.849265071 | no |
| C8orf56   | 0.018834515  | 0.33855774   | 0.735162893 | 0.849355317 | no |
| ARHGAP40  | -0.018833409 | -0.338537843 | 0.73517787  | 0.849355317 | no |
| ZNF621    | 0.018828598  | 0.338451341  | 0.735242984 | 0.849384883 | no |
| MICAL2    | 0.018808143  | 0.338083525  | 0.735519879 | 0.849659091 | no |
| GUSBP5    | -0.018788656 | -0.337733121 | 0.735783698 | 0.849918165 | no |
| CCT6A     | -0.018772292 | -0.337438869 | 0.736005265 | 0.850113699 | no |
| SNRPD2P2  | -0.018770311 | -0.337403249 | 0.736032088 | 0.850113699 | no |
| ADAM30    | 0.018743585  | 0.33692266   | 0.736394015 | 0.850415576 | no |
| SPINK9    | -0.018742768 | -0.336907969 | 0.736405079 | 0.850415576 | no |
| OR7A10    | -0.018742245 | -0.336898558 | 0.736412167 | 0.850415576 | no |
| TMPRSS12  | -0.018717373 | -0.336451319 | 0.736749034 | 0.850758878 | no |
| CCDC91    | 0.018705473  | 0.336237352  | 0.736910214 | 0.850899281 | no |
| SWT1      | -0.018698338 | -0.336109051 | 0.737006869 | 0.850965165 | no |
| TTY16     | -0.018686971 | -0.335904645 | 0.737160865 | 0.851093624 | no |

|              |              |              |             |             |    |
|--------------|--------------|--------------|-------------|-------------|----|
| BTBD10       | -0.018684279 | -0.335856246 | 0.73719733  | 0.851093624 | no |
| LINC00336    | -0.01866782  | -0.33556028  | 0.737420328 | 0.851305343 | no |
| TIAM1        | -0.018664785 | -0.335505701 | 0.737461453 | 0.85130709  | no |
| TMEM167A     | -0.01866033  | -0.335425601 | 0.737521811 | 0.851331036 | no |
| CES1P2       | -0.018653642 | -0.335305342 | 0.737612431 | 0.851389911 | no |
| AIMP1        | -0.018647055 | -0.335186898 | 0.737701688 | 0.851447206 | no |
| KPRP         | -0.018637183 | -0.335009384 | 0.737835465 | 0.851555877 | no |
| USP48        | 0.018630849  | 0.334895493  | 0.737921299 | 0.851609206 | no |
| PISRT1       | -0.018618552 | -0.334674369 | 0.738087959 | 0.851716276 | no |
| METTL22      | -0.018618155 | -0.334667232 | 0.738093338 | 0.851716276 | no |
| SLC01B1      | -0.018598733 | -0.334317982 | 0.738356591 | 0.851893621 | no |
| TUBA1B       | 0.018598192  | 0.334308262  | 0.738363918 | 0.851893621 | no |
| TOMM5        | -0.018598043 | -0.334305576 | 0.738365943 | 0.851893621 | no |
| SMIM9        | -0.018592279 | -0.334201938 | 0.738444069 | 0.851895459 | no |
| OTX2         | -0.018592076 | -0.334198294 | 0.738446815 | 0.851895459 | no |
| SLC35A3      | 0.018581517  | 0.334008412  | 0.738589961 | 0.85201486  | no |
| RPL21P44     | -0.01857766  | -0.333939058 | 0.738642247 | 0.852029442 | no |
| LTK          | 0.018567442  | 0.333755324  | 0.73878077  | 0.852132187 | no |
| SEC61G       | 0.018561846  | 0.333654715  | 0.738856625 | 0.852132187 | no |
| OR10A5       | 0.018552853  | 0.333492993  | 0.738978564 | 0.852132187 | no |
| IFNK         | 0.018552609  | 0.333488609  | 0.738981869 | 0.852132187 | no |
| SNORA71B     | 0.018548491  | 0.333414556  | 0.739037707 | 0.852132187 | no |
| PASK         | -0.018545739 | -0.333365087 | 0.739075009 | 0.852132187 | no |
| ACER1        | -0.018543589 | -0.333326424 | 0.739104163 | 0.852132187 | no |
| DISC2        | 0.01854301   | 0.333316011  | 0.739112016 | 0.852132187 | no |
| CYTH1        | -0.018539178 | -0.333247098 | 0.739163981 | 0.852132187 | no |
| MAP3K1       | -0.018538678 | -0.333238108 | 0.73917076  | 0.852132187 | no |
| CIRH1A       | -0.018536788 | -0.333204134 | 0.73919638  | 0.852132187 | no |
| ACR          | -0.018535996 | -0.333189882 | 0.739207127 | 0.852132187 | no |
| LOC253573    | -0.018506849 | -0.332665774 | 0.73960239  | 0.852504917 | no |
| KCNA6        | -0.018506302 | -0.33265595  | 0.739609799 | 0.852504917 | no |
| ZC3H15       | -0.018495811 | -0.332467305 | 0.739752085 | 0.852598502 | no |
| RFK          | 0.018494466  | 0.33244311   | 0.739770335 | 0.852598502 | no |
| IL24         | 0.018485185  | 0.332276237  | 0.739896208 | 0.852679823 | no |
| GNAT3        | 0.018483413  | 0.33224437   | 0.739920246 | 0.852679823 | no |
| ARC          | -0.018472968 | -0.332056543 | 0.740061935 | 0.852782148 | no |
| STX12        | 0.018471016  | 0.332021459  | 0.740088402 | 0.852782148 | no |
| GLYATL3      | -0.018455508 | -0.331742594 | 0.740298785 | 0.852978833 | no |
| TMEM67       | 0.018451764  | 0.331675274  | 0.740349576 | 0.852991623 | no |
| MUC15        | -0.018442328 | -0.33150561  | 0.740477587 | 0.853093375 | no |
| C1orf43      | -0.018417472 | -0.331058652 | 0.74081485  | 0.853382038 | no |
| SLC39A9      | -0.01841616  | -0.331035074 | 0.740832643 | 0.853382038 | no |
| TOP1         | 0.018413096  | 0.330979979  | 0.740874221 | 0.853382038 | no |
| FCF1         | 0.018412156  | 0.330963072  | 0.740886979 | 0.853382038 | no |
| DDTL         | -0.018407413 | -0.330877791 | 0.740951338 | 0.853410429 | no |
| TBC1D3P1-DHX | -0.01840184  | -0.330777572 | 0.741026972 | 0.853451804 | no |
| BPIFA2       | -0.018394576 | -0.330646958 | 0.741125549 | 0.853519596 | no |
| SCGB1D2      | 0.018386857  | 0.330508164  | 0.741230304 | 0.853594495 | no |
| IRGM         | 0.018378457  | 0.330357117  | 0.741344312 | 0.853680042 | no |
| FUNDC2P2     | -0.01837373  | -0.330272125 | 0.741408466 | 0.853708173 | no |
| KIR3DS1      | -0.018369807 | -0.330201577 | 0.741461718 | 0.853723749 | no |

|              |              |              |             |             |    |
|--------------|--------------|--------------|-------------|-------------|----|
| HYAL4        | 0.018365928  | 0.330131831  | 0.741514366 | 0.853738629 | no |
| TRO          | 0.018361858  | 0.330058642  | 0.741569615 | 0.8537565   | no |
| DHDH         | -0.018351501 | -0.329872414 | 0.741710199 | 0.85387261  | no |
| PRM3         | -0.018348534 | -0.329819056 | 0.741750481 | 0.853873244 | no |
| FUT3         | -0.018326325 | -0.329419712 | 0.742051982 | 0.854174566 | no |
| SLC13A2      | -0.018320865 | -0.329321531 | 0.742126114 | 0.854214146 | no |
| CANX         | -0.01829772  | -0.32890536  | 0.742440372 | 0.854382987 | no |
| BBS12        | 0.018292714  | 0.32881535   | 0.742508346 | 0.854382987 | no |
| LOC389834    | 0.018291147  | 0.328787165  | 0.742529631 | 0.854382987 | no |
| LOC100506394 | -0.018291117 | -0.328786637 | 0.74253003  | 0.854382987 | no |
| GADL1        | -0.01829062  | -0.328777697 | 0.742536782 | 0.854382987 | no |
| FCRL4        | -0.018289825 | -0.328763401 | 0.742547578 | 0.854382987 | no |
| DCAF8L2      | -0.018285653 | -0.328688385 | 0.742604231 | 0.854382987 | no |
| RCOR3        | -0.01828378  | -0.328654709 | 0.742629664 | 0.854382987 | no |
| VKORC1L1     | -0.018283711 | -0.328653471 | 0.742630599 | 0.854382987 | no |
| MIR490       | 0.018274434  | 0.328486648  | 0.742756592 | 0.854482197 | no |
| PTX4         | -0.018249071 | -0.328030596 | 0.743101063 | 0.854795491 | no |
| TMEM201      | -0.018248526 | -0.328020787 | 0.743108472 | 0.854795491 | no |
| OR13C2       | -0.018238711 | -0.327844315 | 0.743241781 | 0.854903079 | no |
| INMT-FAM188E | -0.018222919 | -0.327560358 | 0.743456302 | 0.854921851 | no |
| TMPRSS4-AS1  | 0.018222396  | 0.32755094   | 0.743463417 | 0.854921851 | no |
| ANO10        | -0.018220983 | -0.327525543 | 0.743482604 | 0.854921851 | no |
| ACTRT2       | -0.018220951 | -0.327524958 | 0.743483047 | 0.854921851 | no |
| OR10G9       | -0.018220016 | -0.327508149 | 0.743495746 | 0.854921851 | no |
| AHSP         | -0.018219939 | -0.327506774 | 0.743496785 | 0.854921851 | no |
| ZNF181       | 0.018208626  | 0.327303354  | 0.743650477 | 0.855052828 | no |
| DDC          | -0.01820297  | -0.327201653 | 0.74372732  | 0.855095433 | no |
| BLOC1S1-RDH5 | -0.018187429 | -0.326922192 | 0.743938489 | 0.855292466 | no |
| ST13P4       | -0.018182894 | -0.326840655 | 0.744000104 | 0.85530155  | no |
| MIER2        | 0.018180989  | 0.326806405  | 0.744025986 | 0.85530155  | no |
| NPC1         | 0.018158867  | 0.32640862   | 0.744326608 | 0.855601366 | no |
| SPRR1B       | -0.018141188 | -0.326090731 | 0.744566878 | 0.85583178  | no |
| RFXANK       | 0.018136425  | 0.326005086  | 0.744631615 | 0.855860415 | no |
| LINC00700    | -0.01812923  | -0.325875713 | 0.744729409 | 0.85592704  | no |
| OR8D1        | -0.018126203 | -0.325821294 | 0.744770546 | 0.855928545 | no |
| TMEM225      | -0.018114567 | -0.325612056 | 0.744928721 | 0.855961608 | no |
| FABP5P3      | -0.018114251 | -0.325606384 | 0.744933009 | 0.855961608 | no |
| NUDT3        | 0.018114171  | 0.325604944  | 0.744934098 | 0.855961608 | no |
| BEST1        | 0.0181116    | 0.325558712  | 0.744969049 | 0.855961608 | no |
| HEATR4       | 0.018107951  | 0.325493096  | 0.745018655 | 0.855961608 | no |
| HOXD13       | -0.018105514 | -0.325449271 | 0.745051788 | 0.855961608 | no |
| CYP3A7       | 0.018103577  | 0.325414447  | 0.745078116 | 0.855961608 | no |
| HIST1H4I     | 0.018095803  | 0.325274665  | 0.745183799 | 0.856037258 | no |
| SHPK         | 0.018086504  | 0.32510746   | 0.745310221 | 0.8560663   | no |
| COL11A1      | 0.018085249  | 0.325084898  | 0.74532728  | 0.8560663   | no |
| OR52J3       | 0.018080492  | 0.324999359  | 0.745391958 | 0.8560663   | no |
| HAUS8        | 0.01807935   | 0.324978831  | 0.74540748  | 0.8560663   | no |
| LOC728875    | -0.018079294 | -0.324977815 | 0.745408249 | 0.8560663   | no |
| SLC6A20      | -0.018062668 | -0.32467887  | 0.745634305 | 0.856190802 | no |
| CHIC2        | -0.018056517 | -0.324568272 | 0.745717942 | 0.856190802 | no |
| ESF1         | 0.018052219  | 0.32449098   | 0.745776394 | 0.856190802 | no |



|              |              |              |             |             |    |
|--------------|--------------|--------------|-------------|-------------|----|
| HIST1H3C     | 0.018051423  | 0.324476661  | 0.745787223 | 0.856190802 | no |
| LILRA3       | 0.01804773   | 0.324410263  | 0.745837438 | 0.856190802 | no |
| ITFG2        | 0.018047508  | 0.324406267  | 0.74584046  | 0.856190802 | no |
| OR4F6        | -0.018046716 | -0.324392035 | 0.745851224 | 0.856190802 | no |
| IL22         | 0.018045713  | 0.324373992  | 0.745864869 | 0.856190802 | no |
| LINC00575    | -0.018044952 | -0.324360315 | 0.745875213 | 0.856190802 | no |
| TTC39A       | 0.018035329  | 0.324187282  | 0.746006081 | 0.856295289 | no |
| MAGEB6       | -0.018024883 | -0.323999452 | 0.746148148 | 0.856412617 | no |
| ARMCX3       | 0.017985509  | 0.323291468  | 0.746683717 | 0.856937507 | no |
| CPB1         | -0.017985399 | -0.323289501 | 0.746685205 | 0.856937507 | no |
| TAS1R3       | 0.017977366  | 0.323145054  | 0.74679449  | 0.85697935  | no |
| LINC00184    | 0.017976857  | 0.323135898  | 0.746801417 | 0.85697935  | no |
| CDCA4        | -0.017969118 | -0.322996754 | 0.746906695 | 0.857026955 | no |
| CLEC4G       | -0.017967945 | -0.322975656 | 0.746922659 | 0.857026955 | no |
| CPSF3        | 0.01795042   | 0.322660536  | 0.747161101 | 0.857254777 | no |
| C10orf118    | -0.017939183 | -0.32245848  | 0.747314005 | 0.857384438 | no |
| MYH1         | -0.01793557  | -0.322393531 | 0.747363156 | 0.857395056 | no |
| UBE2F-SCLY   | 0.017916461  | 0.32204992   | 0.747623207 | 0.857614672 | no |
| EXTL3        | -0.017915638 | -0.322035133 | 0.747634399 | 0.857614672 | no |
| FLJ45513     | -0.017911592 | -0.321962376 | 0.747689467 | 0.857627161 | no |
| MCTP1        | 0.017908974  | 0.321915298  | 0.7477251   | 0.857627161 | no |
| DKFZP686I152 | -0.017902301 | -0.321795314 | 0.747815917 | 0.857685552 | no |
| C19orf70     | -0.017896378 | -0.321688825 | 0.747896522 | 0.857732225 | no |
| SNORA68      | 0.017889541  | 0.32156588   | 0.747989587 | 0.857784482 | no |
| GNN          | -0.017886077 | -0.321503603 | 0.74803673  | 0.857784482 | no |
| ANKRD13C     | 0.017884233  | 0.321470447  | 0.748061829 | 0.857784482 | no |
| ISYNA1       | -0.017874592 | -0.321297091 | 0.748193064 | 0.857889192 | no |
| VPS13A       | -0.017870211 | -0.321218315 | 0.748252701 | 0.857911801 | no |
| CCL14        | 0.017866299  | 0.32114797   | 0.748305957 | 0.857927091 | no |
| DZANK1       | 0.017863107  | 0.321090576  | 0.74834941  | 0.857931141 | no |
| C9orf41      | -0.017854779 | -0.320940827 | 0.748462787 | 0.858015349 | no |
| PRPF18       | -0.0178446   | -0.320757806 | 0.748601362 | 0.858128434 | no |
| OR5L1        | -0.017832732 | -0.320544417 | 0.748762941 | 0.858267874 | no |
| AVL9         | -0.017828147 | -0.32046197  | 0.748825373 | 0.858293658 | no |
| RCAN3AS      | 0.017815672  | 0.320237651  | 0.748995244 | 0.858442578 | no |
| ALPP         | -0.017786349 | -0.319710402 | 0.749394565 | 0.858854447 | no |
| NSUN5P2      | 0.017783318  | 0.31965591   | 0.749435839 | 0.858855949 | no |
| GOLGA8T      | 0.017776785  | 0.319538446  | 0.749524813 | 0.858889037 | no |
| CCDC47       | 0.017773591  | 0.319481012  | 0.749568319 | 0.858889037 | no |
| MRI1         | -0.017771698 | -0.319446972 | 0.749594103 | 0.858889037 | no |
| PARD3        | 0.017769461  | 0.31940675   | 0.749624571 | 0.858889037 | no |
| TAS2R8       | -0.01776442  | -0.319316107 | 0.749693235 | 0.858921916 | no |
| NEBL         | 0.017756902  | 0.319180935  | 0.749795634 | 0.858993441 | no |
| RNU5F-1      | -0.017753096 | -0.319112491 | 0.749847484 | 0.859007052 | no |
| TAS2R13      | 0.017737203  | 0.318826725  | 0.750063984 | 0.859209268 | no |
| PFN3         | -0.017710334 | -0.318343602 | 0.750430048 | 0.859582782 | no |
| RABL2A       | -0.017706984 | -0.318283366 | 0.750475694 | 0.859589252 | no |
| OR4S1        | -0.017702685 | -0.318206065 | 0.750534271 | 0.859610531 | no |
| PCGF6        | -0.017691349 | -0.318002239 | 0.750688734 | 0.859741625 | no |
| MBOAT4       | 0.017664674  | 0.317522617  | 0.751052241 | 0.86007684  | no |
| KRT15        | -0.017663873 | -0.317508211 | 0.75106316  | 0.86007684  | no |

|              |              |              |             |             |    |
|--------------|--------------|--------------|-------------|-------------|----|
| LOC100130776 | 0.017661061  | 0.317457642  | 0.751101491 | 0.86007684  | no |
| BSPH1        | -0.017644718 | -0.317163793 | 0.751324231 | 0.860212279 | no |
| TEX36        | -0.017643252 | -0.317137438 | 0.75134421  | 0.860212279 | no |
| HES2         | -0.017641165 | -0.317099913 | 0.751372655 | 0.860212279 | no |
| KRT72        | 0.017636796  | 0.317021348  | 0.751432214 | 0.860212279 | no |
| TAS2R16      | 0.017635908  | 0.317005379  | 0.751444319 | 0.860212279 | no |
| PIGW         | 0.017634763  | 0.316984788  | 0.751459929 | 0.860212279 | no |
| THAP8        | -0.01762758  | -0.316855639 | 0.751557838 | 0.860273902 | no |
| CSPG4        | 0.017624627  | 0.316802551  | 0.751598085 | 0.860273902 | no |
| RPS27        | 0.017622004  | 0.316755377  | 0.75163385  | 0.860273902 | no |
| RAMP1        | 0.017611975  | 0.316575059  | 0.751770561 | 0.860361329 | no |
| RHCG         | -0.017610527 | -0.316549022 | 0.751790302 | 0.860361329 | no |
| FNTA         | -0.017587463 | -0.316134318 | 0.752104749 | 0.860675355 | no |
| ACOT13       | 0.017578955  | 0.315981335  | 0.752220759 | 0.860762277 | no |
| ZNF705D      | 0.017571087  | 0.315839868  | 0.75232804  | 0.860839202 | no |
| CFP          | 0.017559036  | 0.315623184  | 0.752492371 | 0.860924097 | no |
| MAGEA1       | 0.01755654   | 0.315578305  | 0.752526408 | 0.860924097 | no |
| HIST1H3I     | -0.017555249 | -0.315555092 | 0.752544014 | 0.860924097 | no |
| LY6G6D       | -0.017553896 | -0.315530755 | 0.752562472 | 0.860924097 | no |
| OR4F15       | 0.017531753  | 0.315132625  | 0.752864449 | 0.861223711 | no |
| DAPL1        | -0.017526522 | -0.315038571 | 0.752935793 | 0.861259481 | no |
| S100A14      | -0.017521358 | -0.314945713 | 0.753006232 | 0.861267803 | no |
| CHAD         | -0.017510754 | -0.314755042 | 0.753150876 | 0.861267803 | no |
| SMAD3        | -0.017508724 | -0.314718541 | 0.753178566 | 0.861267803 | no |
| DEFB121      | 0.017508688  | 0.314717897  | 0.753179055 | 0.861267803 | no |
| ZNF787       | 0.017505574  | 0.314661906  | 0.753221532 | 0.861267803 | no |
| OR5P3        | 0.017500632  | 0.314573044  | 0.753288948 | 0.861267803 | no |
| CMA1         | 0.017497869  | 0.314523368  | 0.753326636 | 0.861267803 | no |
| RAD23B       | -0.017497845 | -0.314522937 | 0.753326963 | 0.861267803 | no |
| DNTT         | 0.017497039  | 0.314508437  | 0.753337964 | 0.861267803 | no |
| ZNF658B      | 0.017495024  | 0.314472212  | 0.753365447 | 0.861267803 | no |
| C8orf40      | -0.017493671 | -0.314447888 | 0.753383902 | 0.861267803 | no |
| AHNAK        | 0.017488935  | 0.314362725  | 0.753448516 | 0.861295855 | no |
| CBL          | -0.017482909 | -0.314254382 | 0.75353072  | 0.861344008 | no |
| FAM89B       | 0.01746565   | 0.313944065  | 0.753766183 | 0.861560835 | no |
| XRCC4        | 0.017461332  | 0.313866414  | 0.753825106 | 0.861560835 | no |
| EIF3IP1      | 0.017459518  | 0.313833794  | 0.75384986  | 0.861560835 | no |
| UPK3BL       | -0.017457253 | -0.313793069 | 0.753880765 | 0.861560835 | no |
| SIAE         | -0.0174516   | -0.313691422 | 0.753957901 | 0.861603172 | no |
| NT5C1B       | -0.017443451 | -0.3135449   | 0.754069096 | 0.861684423 | no |
| IFNA7        | -0.017438665 | -0.313458854 | 0.754134399 | 0.861713226 | no |
| GP5          | 0.017430249  | 0.313307531  | 0.754249246 | 0.861798636 | no |
| GATA1        | -0.017427164 | -0.313252054 | 0.754291352 | 0.861800927 | no |
| SNX18        | -0.017420703 | -0.313135899 | 0.754379513 | 0.861832595 | no |
| SI           | -0.017419256 | -0.313109866 | 0.754399273 | 0.861832595 | no |
| SERPINA13P   | -0.017415323 | -0.313039163 | 0.754452938 | 0.861848089 | no |
| IL17REL      | -0.017399121 | -0.312747838 | 0.754674074 | 0.862054881 | no |
| YWHAZ        | -0.01738497  | -0.312493397 | 0.754867229 | 0.86222969  | no |
| GLYCAM1      | -0.017377472 | -0.312358583 | 0.754969578 | 0.862300765 | no |
| PRL          | -0.017373377 | -0.312284957 | 0.755025475 | 0.86231878  | no |
| FLG          | 0.017362362  | 0.312086906  | 0.755175844 | 0.862444684 | no |

|             |              |              |             |             |    |
|-------------|--------------|--------------|-------------|-------------|----|
| OR1E1       | -0.017348611 | -0.311839644 | 0.755363588 | 0.862613256 | no |
| AADACL4     | -0.017345346 | -0.311780952 | 0.755408154 | 0.862618312 | no |
| GC          | 0.017336092  | 0.311614549  | 0.755534512 | 0.862710467 | no |
| ATPBD4      | -0.017333555 | -0.311568948 | 0.755569141 | 0.862710467 | no |
| FAM71A      | 0.017325134  | 0.31141752   | 0.755684136 | 0.862795929 | no |
| ZNF417      | 0.017319022  | 0.311307625  | 0.755767594 | 0.862845377 | no |
| HHLA1       | 0.01730353   | 0.311029081  | 0.755979143 | 0.862892577 | no |
| OR13A1      | -0.017301875 | -0.310999327 | 0.756001742 | 0.862892577 | no |
| ZNF160      | 0.017299253  | 0.310952174  | 0.756037555 | 0.862892577 | no |
| HSD11B1     | -0.017297729 | -0.310924781 | 0.756058361 | 0.862892577 | no |
| C9orf62     | -0.017296485 | -0.310902415 | 0.756075349 | 0.862892577 | no |
| REV1        | -0.017296249 | -0.310898161 | 0.75607858  | 0.862892577 | no |
| BOD1L2      | -0.017295413 | -0.310883131 | 0.756089996 | 0.862892577 | no |
| HRC         | 0.017272776  | 0.31047611   | 0.756399168 | 0.863176362 | no |
| HSD17B12    | 0.017271325  | 0.310450021  | 0.756418986 | 0.863176362 | no |
| RALY        | 0.017263708  | 0.310313076  | 0.756523019 | 0.86324924  | no |
| EPPIN-WFDC6 | 0.01725418   | 0.310141763  | 0.756653166 | 0.863351908 | no |
| HIGD2A      | -0.017239409 | -0.309876162 | 0.756854957 | 0.863536308 | no |
| ZNF334      | 0.017230942  | 0.309723935  | 0.75697062  | 0.863583057 | no |
| ZNF750      | -0.017230527 | -0.309716462 | 0.756976299 | 0.863583057 | no |
| NBEAL1      | -0.017215106 | -0.309439206 | 0.757186973 | 0.863736896 | no |
| ACAP2       | 0.017213087  | 0.309402902  | 0.75721456  | 0.863736896 | no |
| LOC285878   | -0.017211832 | -0.309380323 | 0.757231718 | 0.863736896 | no |
| PPP1R32     | -0.017204676 | -0.309251658 | 0.757329493 | 0.863802576 | no |
| TMEM63A     | -0.017200091 | -0.309169218 | 0.757392142 | 0.863828187 | no |
| LINC00114   | -0.017167339 | -0.308580337 | 0.757839705 | 0.864252359 | no |
| DCLK1       | -0.01716667  | -0.308568317 | 0.757848841 | 0.864252359 | no |
| CHCHD10     | 0.01716119   | 0.308469783  | 0.757923738 | 0.864252359 | no |
| CES5A       | -0.017161105 | -0.308468243 | 0.757924908 | 0.864252359 | no |
| C9orf24     | -0.017151224 | -0.308290589 | 0.75805995  | 0.864337038 | no |
| SCLT1       | 0.017149786  | 0.30826473   | 0.758079607 | 0.864337038 | no |
| LOC285540   | -0.017143711 | -0.308155499 | 0.758162642 | 0.864385853 | no |
| KRTAP12-2   | -0.017134601 | -0.307991702 | 0.758287162 | 0.864481958 | no |
| C19orf52    | 0.017130398  | 0.307916137  | 0.75834461  | 0.864501592 | no |
| KRT82       | -0.017126967 | -0.307854442 | 0.758391514 | 0.864509204 | no |
| MEOX2       | 0.017120921  | 0.307745732  | 0.758474163 | 0.86455756  | no |
| CKAP2L      | 0.017116711  | 0.307670033  | 0.758531717 | 0.864577307 | no |
| TNNI3       | 0.017092078  | 0.307227136  | 0.758868477 | 0.864915275 | no |
| OR51I1      | 0.017065843  | 0.306755438  | 0.759227186 | 0.865278224 | no |
| DBH         | 0.017062095  | 0.306688046  | 0.75927844  | 0.865279028 | no |
| MIR492      | -0.017059903 | -0.30664863  | 0.759308417 | 0.865279028 | no |
| SREK1       | 0.017048732  | 0.306447768  | 0.759461186 | 0.865407229 | no |
| TMEM5       | -0.017030308 | -0.306116506 | 0.759713154 | 0.865648449 | no |
| TMEM51-AS1  | 0.017024703  | 0.306015731  | 0.759789812 | 0.86565042  | no |
| CHODL-AS1   | 0.017024291  | 0.306008327  | 0.759795444 | 0.86565042  | no |
| LINC00659   | 0.017017817  | 0.305891919  | 0.759883996 | 0.865665834 | no |
| SLX4IP      | -0.017016201 | -0.305862868 | 0.759906096 | 0.865665834 | no |
| GATA4       | 0.017014467  | 0.305831691  | 0.759929814 | 0.865665834 | no |
| KIAA1432    | -0.017003616 | -0.305636581 | 0.760078245 | 0.865753507 | no |
| CCDC159     | 0.01700295   | 0.305624618  | 0.760087346 | 0.865753507 | no |
| HOXD8       | -0.016992764 | -0.305441459 | 0.760226694 | 0.865823505 | no |

|             |              |              |             |             |    |
|-------------|--------------|--------------|-------------|-------------|----|
| TBX1        | -0.016992567 | -0.305437933 | 0.760229377 | 0.865823505 | no |
| FLJ42393    | -0.016981878 | -0.305245742 | 0.760375605 | 0.865916526 | no |
| NPY2R       | 0.016980706  | 0.305224671  | 0.760391638 | 0.865916526 | no |
| GUCA1A      | 0.016967544  | 0.304988004  | 0.760571719 | 0.866075706 | no |
| COL4A4      | -0.016955533 | -0.304772061 | 0.760736042 | 0.866216927 | no |
| GPR119      | -0.01694935  | -0.304660885 | 0.760820646 | 0.866260151 | no |
| LINC00282   | 0.016944228  | 0.304568794  | 0.76089073  | 0.866260151 | no |
| KCNG4       | 0.01694218   | 0.304531963  | 0.760918759 | 0.866260151 | no |
| VTI1A       | -0.016939636 | -0.304486228 | 0.760953566 | 0.866260151 | no |
| HSP90B2P    | -0.01693803  | -0.304457351 | 0.760975543 | 0.866260151 | no |
| MEP1B       | -0.01692144  | -0.304159071 | 0.76120256  | 0.866472681 | no |
| LINC00202-2 | 0.016909931  | 0.303952139  | 0.761360066 | 0.866606068 | no |
| C18orf21    | 0.016887647  | 0.303551468  | 0.761665064 | 0.866868601 | no |
| ACN9        | 0.016887185  | 0.303543162  | 0.761671388 | 0.866868601 | no |
| LOC285441   | 0.016882938  | 0.303466794  | 0.761729524 | 0.866888859 | no |
| HNRNPA2B1   | -0.016875515 | -0.303333336 | 0.761831127 | 0.866942116 | no |
| WDR5        | -0.016873625 | -0.303299349 | 0.761857001 | 0.866942116 | no |
| KLK2        | 0.016855458  | 0.302972708  | 0.762105694 | 0.867159562 | no |
| L3MBTL4     | 0.01685377   | 0.302942375  | 0.762128789 | 0.867159562 | no |
| ZBTB1       | -0.01685044  | -0.302882494 | 0.762174383 | 0.867165529 | no |
| HSD3B2      | -0.016840571 | -0.302705047 | 0.762309498 | 0.867228103 | no |
| BPGM        | -0.016837175 | -0.302643992 | 0.76235599  | 0.867228103 | no |
| ZNF641      | -0.01683526  | -0.30260956  | 0.762382209 | 0.867228103 | no |
| RAD51       | -0.016832072 | -0.302552237 | 0.76242586  | 0.867228103 | no |
| HJURP       | -0.016831686 | -0.302545294 | 0.762431147 | 0.867228103 | no |
| DIAPH3-AS2  | -0.016824854 | -0.302422457 | 0.762524689 | 0.867255903 | no |
| C2orf15     | -0.016824006 | -0.302407215 | 0.762536296 | 0.867255903 | no |
| FBXL7       | -0.016813426 | -0.302216983 | 0.762681168 | 0.867329185 | no |
| HIST1H2BL   | -0.016813406 | -0.302216619 | 0.762681445 | 0.867329185 | no |
| CCDC172     | -0.016809825 | -0.30215225  | 0.762730468 | 0.867339038 | no |
| CBWD6       | -0.016793892 | -0.301865774 | 0.762948654 | 0.867473488 | no |
| OR2F2       | -0.016792701 | -0.301844348 | 0.762964973 | 0.867473488 | no |
| AGAP1       | -0.016792348 | -0.301838017 | 0.762969795 | 0.867473488 | no |
| GJA3        | 0.016789326  | 0.301783682  | 0.76301118  | 0.867474648 | no |
| C7orf69     | 0.01678239   | 0.301658959  | 0.763106181 | 0.867536761 | no |
| SYPL2       | -0.016757099 | -0.301204237 | 0.763452567 | 0.86788464  | no |
| ROPN1B      | -0.016744713 | -0.30098155  | 0.763622218 | 0.868031582 | no |
| OR3A1       | 0.016736526  | 0.300834342  | 0.763734372 | 0.868113153 | no |
| KRTAP4-11   | 0.016722177  | 0.300576345  | 0.763930946 | 0.868255447 | no |
| FAM133DP    | 0.01672149   | 0.300563992  | 0.763940358 | 0.868255447 | no |
| CLCA1       | -0.016712771 | -0.300407231 | 0.764059806 | 0.868288565 | no |
| CCL24       | -0.016712267 | -0.300398169 | 0.76406671  | 0.868288565 | no |
| FAM186A     | -0.016710516 | -0.30036668  | 0.764090705 | 0.868288565 | no |
| ANKIB1      | -0.016690082 | -0.299999295 | 0.764370668 | 0.86856078  | no |
| CCDC40      | 0.01668449   | 0.299898756  | 0.764447288 | 0.868601918 | no |
| TTY14       | -0.016673532 | -0.299701719 | 0.764597456 | 0.868691344 | no |
| MIR506      | 0.016672847  | 0.299689415  | 0.764606833 | 0.868691344 | no |
| MNT         | -0.016658203 | -0.299426115 | 0.764807517 | 0.868858474 | no |
| NUPL2       | -0.016655339 | -0.299374621 | 0.764846767 | 0.868858474 | no |
| ANGPTL3     | -0.016653181 | -0.299335826 | 0.764876338 | 0.868858474 | no |
| LOC442459   | -0.016650312 | -0.299284246 | 0.764915654 | 0.868858474 | no |

|           |              |              |             |             |    |
|-----------|--------------|--------------|-------------|-------------|----|
| CST13P    | 0.016641324  | 0.299122642  | 0.765038839 | 0.86895247  | no |
| MCEE      | -0.016638244 | -0.299067255 | 0.765081061 | 0.868954501 | no |
| OR5D14    | -0.016630573 | -0.298929341 | 0.765186194 | 0.86900397  | no |
| ZNF296    | -0.016629166 | -0.298904033 | 0.765205488 | 0.86900397  | no |
| LOC389458 | 0.016623154  | 0.29879595   | 0.765287884 | 0.869051621 | no |
| CHAT      | -0.016612263 | -0.298600137 | 0.765437169 | 0.869175219 | no |
| GTF2IRD1  | -0.016603281 | -0.298438635 | 0.765560301 | 0.86926911  | no |
| LOC282997 | -0.016600129 | -0.298381966 | 0.765603509 | 0.869272242 | no |
| POP1      | -0.016596313 | -0.298313358 | 0.76565582  | 0.869285711 | no |
| SNW1      | -0.016586851 | -0.298143227 | 0.765785542 | 0.869328266 | no |
| LOC407835 | -0.0165859   | -0.298126126 | 0.765798582 | 0.869328266 | no |
| EPB42     | -0.016584727 | -0.298105049 | 0.765814654 | 0.869328266 | no |
| KRTAP1-4  | 0.016579919  | 0.298018596  | 0.765880576 | 0.869331115 | no |
| SCAF4     | 0.016578643  | 0.297995661  | 0.765898065 | 0.869331115 | no |
| ATP11A    | 0.016569069  | 0.297823527  | 0.766029328 | 0.869434185 | no |
| SLC6A6    | 0.016548626  | 0.297455962  | 0.766309642 | 0.869706406 | no |
| TMEM258   | -0.016545004 | -0.297390842 | 0.766359307 | 0.869716844 | no |
| OR11H12   | -0.01653936  | -0.29728937  | 0.766436698 | 0.869758744 | no |
| KCNK5     | 0.016535154  | 0.297213747  | 0.766494378 | 0.869778271 | no |
| SSB       | 0.016529402  | 0.297110316  | 0.766573267 | 0.869821863 | no |
| HOXC-AS5  | -0.016522359 | -0.296983688 | 0.766669854 | 0.86988553  | no |
| SCN4A     | 0.016518627  | 0.296916588  | 0.766721037 | 0.869897677 | no |
| SRSF8     | -0.016500368 | -0.296588296 | 0.766971466 | 0.870091832 | no |
| NKX2-8    | -0.016500246 | -0.296586107 | 0.766973136 | 0.870091832 | no |
| SBF2      | -0.016494754 | -0.296487362 | 0.767048466 | 0.870131358 | no |
| LARP1B    | 0.016484289  | 0.296299209  | 0.767192009 | 0.870248256 | no |
| NOP58     | -0.016481204 | -0.296243738 | 0.76723433  | 0.870250329 | no |
| TRIM49    | -0.016476669 | -0.296162204 | 0.767296536 | 0.870274955 | no |
| USP33     | -0.016468196 | -0.29600987  | 0.767412763 | 0.870338236 | no |
| PITPNM2   | -0.016466697 | -0.295982922 | 0.767433324 | 0.870338236 | no |
| LOC201651 | 0.016452925  | 0.295735305  | 0.767622263 | 0.870506572 | no |
| C5orf49   | 0.016445203  | 0.29559646   | 0.767728211 | 0.870534772 | no |
| OR4D6     | -0.01644429  | -0.295580046 | 0.767740737 | 0.870534772 | no |
| PALM3     | 0.016442255  | 0.295543467  | 0.76776865  | 0.870534772 | no |
| ZNF597    | -0.016426187 | -0.295254558 | 0.767989126 | 0.870720808 | no |
| ZNF783    | -0.016424391 | -0.295222283 | 0.768013757 | 0.870720808 | no |
| IGFL3     | 0.01641658   | 0.295081839  | 0.768120942 | 0.87079639  | no |
| CALML5    | -0.016398265 | -0.294752541 | 0.768372275 | 0.871035371 | no |
| AMHR2     | -0.016391624 | -0.294633139 | 0.768463414 | 0.871066718 | no |
| LOC338739 | 0.016390343  | 0.294610112  | 0.768480991 | 0.871066718 | no |
| RNF43     | -0.016386685 | -0.294544341 | 0.768531195 | 0.871077681 | no |
| OMD       | 0.016376854  | 0.294367585  | 0.76866612  | 0.871129068 | no |
| XXYLT1    | -0.016374893 | -0.294332319 | 0.768693042 | 0.871129068 | no |
| OR8K5     | -0.016373343 | -0.294304462 | 0.768714307 | 0.871129068 | no |
| ORC1      | -0.016371568 | -0.294272546 | 0.768738671 | 0.871129068 | no |
| TRPM1     | 0.016365663  | 0.294166371  | 0.768819725 | 0.871160264 | no |
| CTRB1     | -0.016363656 | -0.294130286 | 0.768847272 | 0.871160264 | no |
| MORN2     | 0.016353338  | 0.293944776  | 0.768988898 | 0.8712748   | no |
| UBE2U     | 0.016344891  | 0.293792901  | 0.769104851 | 0.871326719 | no |
| TRIB2     | -0.016344092 | -0.293778549 | 0.769115809 | 0.871326719 | no |
| CASQ2     | -0.016338218 | -0.293672939 | 0.769196443 | 0.871372134 | no |

|            |              |              |             |             |    |
|------------|--------------|--------------|-------------|-------------|----|
| METTL14    | -0.016321535 | -0.293372979 | 0.769425479 | 0.871507322 | no |
| ZNRD1      | -0.016319623 | -0.293338602 | 0.769451729 | 0.871507322 | no |
| ENAM       | -0.016318889 | -0.293325412 | 0.769461801 | 0.871507322 | no |
| TNXB       | -0.01631771  | -0.293304214 | 0.769477988 | 0.871507322 | no |
| LOC283867  | 0.016299861  | 0.292983304  | 0.769723047 | 0.871738933 | no |
| PKD1L3     | 0.016294613  | 0.292888948  | 0.769795105 | 0.871769569 | no |
| LINC00208  | -0.016291983 | -0.292841651 | 0.769831226 | 0.871769569 | no |
| ZDHHC2     | 0.016269548  | 0.292438296  | 0.770139289 | 0.872072473 | no |
| PUS7       | 0.016262495  | 0.292311473  | 0.770236159 | 0.872106783 | no |
| OR4Q3      | -0.016261432 | -0.292292371 | 0.770250749 | 0.872106783 | no |
| CSPP1      | 0.016256554  | 0.292204672  | 0.770317737 | 0.872136681 | no |
| RDH14      | 0.0162478    | 0.292047276  | 0.770437967 | 0.872226853 | no |
| ZNF596     | -0.016237914 | -0.291869529 | 0.770573748 | 0.87233462  | no |
| HBBP1      | -0.016221872 | -0.291581109 | 0.770794089 | 0.872485587 | no |
| SERPINB12  | 0.016218915  | 0.291527948  | 0.770834704 | 0.872485587 | no |
| LOC650368  | 0.01621745   | 0.29150161   | 0.770854827 | 0.872485587 | no |
| FDXR       | 0.016213868  | 0.291437202  | 0.770904035 | 0.872485587 | no |
| CABP7      | -0.016213427 | -0.291429272 | 0.770910093 | 0.872485587 | no |
| MAGEA2     | 0.01621032   | 0.291373407  | 0.770952776 | 0.872487947 | no |
| PPAPDC2    | -0.016202178 | -0.29122702  | 0.771064623 | 0.872538179 | no |
| R3HCC1L    | 0.016201178  | 0.291209038  | 0.771078363 | 0.872538179 | no |
| LY6K       | 0.016192612  | 0.29105503   | 0.771196039 | 0.872625392 | no |
| MIR2682    | -0.016184923 | -0.29091679  | 0.771301671 | 0.872698969 | no |
| ZNF419     | -0.01617983  | -0.290825232 | 0.771371636 | 0.872706207 | no |
| LOC284276  | 0.016178546  | 0.290802136  | 0.771389284 | 0.872706207 | no |
| TMEM57     | -0.016151225 | -0.290310933 | 0.771764671 | 0.873084937 | no |
| CDC42BPG   | 0.016134764  | 0.290014963  | 0.771990882 | 0.873294875 | no |
| SPATA13    | -0.01613     | -0.289929315 | 0.772056347 | 0.873322962 | no |
| MBD3L5     | 0.016119854  | 0.2897469    | 0.772195781 | 0.873434712 | no |
| WDR91      | -0.016108598 | -0.289544532 | 0.772350475 | 0.873563711 | no |
| RGPD8      | 0.01610213   | 0.289428238  | 0.772439377 | 0.873618285 | no |
| DSCR4      | -0.016089658 | -0.289203993 | 0.772610811 | 0.873755915 | no |
| LRP12      | -0.016087361 | -0.289162699 | 0.772642381 | 0.873755915 | no |
| DMP1       | -0.016069771 | -0.288846455 | 0.77288417  | 0.873942844 | no |
| C11orf58   | -0.016069419 | -0.288840125 | 0.772889009 | 0.873942844 | no |
| HOXA11-AS  | -0.016049046 | -0.288473829 | 0.773169094 | 0.874176519 | no |
| VGLL4      | 0.016043605  | 0.288376003  | 0.773243901 | 0.874176519 | no |
| AGPAT3     | -0.016042767 | -0.288360948 | 0.773255413 | 0.874176519 | no |
| ZMAT3      | -0.016042552 | -0.288357081 | 0.77325837  | 0.874176519 | no |
| KCNAB1-AS1 | 0.01603408   | 0.288204751  | 0.773374861 | 0.874262224 | no |
| OR5D18     | -0.01602688  | -0.288075307 | 0.773473854 | 0.874319055 | no |
| C6orf118   | 0.016022767  | 0.28800136   | 0.773530406 | 0.874319055 | no |
| TLX2       | -0.016021547 | -0.287979424 | 0.773547183 | 0.874319055 | no |
| MYRF       | -0.016004425 | -0.287671589 | 0.773782622 | 0.874539171 | no |
| EBLN1      | -0.015996955 | -0.287537282 | 0.77388535  | 0.874609279 | no |
| NROB2      | -0.015985463 | -0.287330663 | 0.774043395 | 0.874741894 | no |
| LINC00240  | 0.015958948  | 0.286853941  | 0.77440808  | 0.875108006 | no |
| HIST1H2BN  | -0.015955148 | -0.286785635 | 0.774460337 | 0.875121043 | no |
| C15orf32   | 0.01594392   | 0.286583767  | 0.774614782 | 0.875249541 | no |
| SPATA31A3  | -0.015937503 | -0.286468386 | 0.774703061 | 0.875303269 | no |
| TCL6       | 0.015917602  | 0.28611059   | 0.774976833 | 0.87556656  | no |

|           |              |              |             |             |    |
|-----------|--------------|--------------|-------------|-------------|----|
| FTMT      | 0.015900064  | 0.285795269  | 0.775218128 | 0.875764686 | no |
| ODF1      | -0.015897177 | -0.285743363 | 0.77525785  | 0.875764686 | no |
| SLC5A1    | -0.015895971 | -0.285721675 | 0.775274448 | 0.875764686 | no |
| CCDC13    | -0.015892928 | -0.285666965 | 0.775316317 | 0.87576595  | no |
| ACOT1     | -0.015883051 | -0.285489395 | 0.775452214 | 0.875873418 | no |
| PBX2      | 0.01587329   | 0.285313906  | 0.775586526 | 0.875979085 | no |
| FAM122B   | 0.015864118  | 0.285148998  | 0.775712745 | 0.876075601 | no |
| LOC285501 | 0.015845854  | 0.284820631  | 0.775964093 | 0.876276766 | no |
| CCDC33    | 0.01584525   | 0.284809762  | 0.775972413 | 0.876276766 | no |
| ZNF382    | 0.015836499  | 0.284652434  | 0.776092848 | 0.876296331 | no |
| COMMD3    | 0.015835232  | 0.284629649  | 0.776110291 | 0.876296331 | no |
| TMC1      | 0.015835103  | 0.284627333  | 0.776112064 | 0.876296331 | no |
| CASP10    | 0.015822039  | 0.284392468  | 0.776291865 | 0.876411435 | no |
| SKIV2L    | 0.01582177   | 0.28438763   | 0.776295569 | 0.876411435 | no |
| LINC00606 | 0.015817648  | 0.284313507  | 0.776352317 | 0.876429461 | no |
| TPD52L3   | 0.015811521  | 0.284203365  | 0.776436642 | 0.876478615 | no |
| ACLY      | -0.015792671 | -0.283864447 | 0.776696136 | 0.87671831  | no |
| CGA       | 0.015790169  | 0.28381948   | 0.776730568 | 0.87671831  | no |
| ZNF839    | 0.015781315  | 0.283660284  | 0.776852467 | 0.876809851 | no |
| ZNF644    | 0.015773152  | 0.283513516  | 0.776964855 | 0.876890647 | no |
| PRAMEF3   | 0.015765206  | 0.283370664  | 0.777074249 | 0.876938982 | no |
| ZNF679    | 0.015764113  | 0.28335102   | 0.777089292 | 0.876938982 | no |
| TSPAN31   | -0.015760153 | -0.283279812 | 0.777143824 | 0.876954472 | no |
| ACP1      | 0.015744357  | 0.282995823  | 0.777361317 | 0.877153842 | no |
| CENPA     | 0.015719642  | 0.282551483  | 0.777701651 | 0.877491793 | no |
| MIR5004   | -0.015713134 | -0.282434466 | 0.777791285 | 0.877546855 | no |
| TP53AIP1  | -0.015705303 | -0.282293667 | 0.777899139 | 0.877584227 | no |
| TUBA4B    | -0.015704799 | -0.282284609 | 0.777906078 | 0.877584227 | no |
| PLA2G3    | -0.015693824 | -0.282087288 | 0.778057237 | 0.877669835 | no |
| LOC503519 | -0.015690496 | -0.282027464 | 0.778103067 | 0.877669835 | no |
| KRTAP21-2 | -0.015690394 | -0.282025622 | 0.778104479 | 0.877669835 | no |
| FOXD2-AS1 | 0.01568538   | 0.281935482  | 0.778173535 | 0.877695315 | no |
| CTAGE1    | -0.015680773 | -0.281852659 | 0.778236987 | 0.877695315 | no |
| BHLHA15   | 0.015679858  | 0.281836211  | 0.778249589 | 0.877695315 | no |
| TTL       | 0.015673859  | 0.281728345  | 0.77833223  | 0.877719226 | no |
| OR11H2    | -0.015672389 | -0.281701923 | 0.778352473 | 0.877719226 | no |
| WNT16     | 0.01566056   | 0.281489243  | 0.778515426 | 0.877842331 | no |
| RNASE13   | -0.015658534 | -0.281452817 | 0.778543336 | 0.877842331 | no |
| ITLN1     | -0.015641577 | -0.28114796  | 0.778776932 | 0.878059653 | no |
| MT1B      | 0.015636239  | 0.281051977  | 0.778850483 | 0.878096513 | no |
| GRIN3B    | 0.01562129   | 0.280783218  | 0.779056442 | 0.878280837 | no |
| OR2M5     | -0.01561351  | -0.280643344 | 0.779163638 | 0.878280837 | no |
| ADORA2B   | 0.015613494  | 0.280643058  | 0.779163857 | 0.878280837 | no |
| PDCD10    | -0.015612508 | -0.28062533  | 0.779177443 | 0.878280837 | no |
| WFDC9     | -0.015594896 | -0.280308695 | 0.779420122 | 0.878475377 | no |
| UBE4B     | -0.01559405  | -0.280293478 | 0.779431785 | 0.878475377 | no |
| SLC10A4   | -0.015577658 | -0.279998779 | 0.779657672 | 0.878683886 | no |
| MAP1LC3B2 | -0.015573357 | -0.279921441 | 0.779716954 | 0.878704618 | no |
| AK2       | 0.015564075  | 0.279754558  | 0.779844881 | 0.878802702 | no |
| OR2B11    | -0.015551064 | -0.279520644 | 0.780024201 | 0.878880162 | no |
| OR1D2     | -0.015549846 | -0.279498755 | 0.780040981 | 0.878880162 | no |

|              |              |              |             |             |    |
|--------------|--------------|--------------|-------------|-------------|----|
| AGXT2        | -0.015549689 | -0.279495927 | 0.78004315  | 0.878880162 | no |
| PIP4K2C      | -0.01554579  | -0.279425828 | 0.780096891 | 0.878880162 | no |
| HEPHL1       | 0.015544252  | 0.279398171  | 0.780118095 | 0.878880162 | no |
| LINC00616    | -0.015539024 | -0.27930418  | 0.780190154 | 0.87891527  | no |
| ZNF878       | 0.015528287  | 0.279111148  | 0.780338152 | 0.879035917 | no |
| SLC22A25     | -0.01551573  | -0.278885392 | 0.780511249 | 0.879184824 | no |
| SHC4         | 0.015511536  | 0.278809974  | 0.780569077 | 0.879203881 | no |
| CLDN8        | -0.015501041 | -0.2786213   | 0.780713754 | 0.879234525 | no |
| OTP          | -0.015499609 | -0.27859556  | 0.780733492 | 0.879234525 | no |
| CECR7        | -0.015495891 | -0.278528712 | 0.780784754 | 0.879234525 | no |
| C14orf177    | -0.015494558 | -0.278504743 | 0.780803135 | 0.879234525 | no |
| OR2M4        | -0.015492902 | -0.278474961 | 0.780825973 | 0.879234525 | no |
| CSRNP2       | -0.015491757 | -0.278454382 | 0.780841754 | 0.879234525 | no |
| ERI3         | -0.015484289 | -0.278320119 | 0.780944717 | 0.879304391 | no |
| ADAM21       | -0.015460486 | -0.27789218  | 0.781272919 | 0.879627844 | no |
| ARHGAP36     | 0.015454609  | 0.277786505  | 0.781353971 | 0.879640928 | no |
| OR13D1       | -0.015453707 | -0.277770299 | 0.781366401 | 0.879640928 | no |
| FLJ20518     | -0.015441995 | -0.277559723 | 0.781527919 | 0.879776676 | no |
| MIR7-1       | 0.015437424  | 0.277477546  | 0.781590954 | 0.87980155  | no |
| FAM71B       | -0.015424408 | -0.277243532 | 0.781770465 | 0.879957527 | no |
| KRTAP19-6    | 0.015403947  | 0.276875683  | 0.782052664 | 0.880200635 | no |
| ZFPM1        | -0.015402809 | -0.276855225 | 0.78206836  | 0.880200635 | no |
| ZNF71        | -0.01539557  | -0.276725067 | 0.782168219 | 0.880266924 | no |
| OLFM2        | -0.015379291 | -0.276432392 | 0.782392777 | 0.880473539 | no |
| ZNF558       | 0.015376084  | 0.276374741  | 0.782437012 | 0.880477214 | no |
| TCF24        | 0.015370215  | 0.276269223  | 0.782517979 | 0.88052222  | no |
| MIR181C      | 0.015366702  | 0.276206058  | 0.782566447 | 0.880530655 | no |
| C3orf14      | -0.015353545 | -0.275969529 | 0.782747951 | 0.880688771 | no |
| OR5AS1       | 0.015337464  | 0.27568041   | 0.782969827 | 0.880857678 | no |
| OR1C1        | 0.015333878  | 0.275615946  | 0.783019301 | 0.880857678 | no |
| GPHA2        | -0.015329842 | -0.275543383 | 0.783074991 | 0.880857678 | no |
| ADH1A        | 0.01532835   | 0.275516544  | 0.78309559  | 0.880857678 | no |
| SLC04A1      | 0.015327812  | 0.275506875  | 0.78310301  | 0.880857678 | no |
| SPATA31D5P   | 0.015324563  | 0.275448462  | 0.783147842 | 0.880862002 | no |
| SLC7A10      | -0.015320643 | -0.275377995 | 0.783201926 | 0.880876732 | no |
| SPACA1       | -0.01530932  | -0.275174417 | 0.783358181 | 0.881006367 | no |
| OR10H3       | -0.015303852 | -0.275076112 | 0.783433637 | 0.881045122 | no |
| APCS         | -0.015297849 | -0.274968194 | 0.783516474 | 0.881092174 | no |
| S1PR2        | 0.015287037  | 0.274773798  | 0.783665697 | 0.88112746  | no |
| NETO2        | -0.01528475  | -0.274732681 | 0.78369726  | 0.88112746  | no |
| LOC100292680 | 0.015284066  | 0.274720387  | 0.783706698 | 0.88112746  | no |
| ARL8B        | -0.015281132 | -0.274667642 | 0.783747188 | 0.88112746  | no |
| ZKSCAN3      | -0.015280722 | -0.274660264 | 0.783752852 | 0.88112746  | no |
| OR51M1       | -0.01526612  | -0.274397753 | 0.783954381 | 0.881281436 | no |
| IL5RA        | -0.015264856 | -0.27437503  | 0.783971825 | 0.881281436 | no |
| YIPF3        | 0.015259256  | 0.274274341  | 0.784049129 | 0.881322236 | no |
| TRPC5OS      | 0.015255192  | 0.274201283  | 0.78410522  | 0.881339188 | no |
| AADAC        | -0.015249466 | -0.274098339 | 0.784184258 | 0.881369212 | no |
| COG6         | -0.015247315 | -0.274059663 | 0.784213953 | 0.881369212 | no |
| OR2B6        | 0.015242527  | 0.273973583  | 0.784280045 | 0.881397398 | no |
| DENND2A      | 0.015231227  | 0.273770432  | 0.784436032 | 0.881526603 | no |



|              |              |              |             |             |    |
|--------------|--------------|--------------|-------------|-------------|----|
| SLC25A51     | 0.015227617  | 0.273705532  | 0.784485866 | 0.88153651  | no |
| C16orf55     | -0.015215098 | -0.273480449 | 0.784658706 | 0.881679375 | no |
| STAG3L2      | 0.015212465  | 0.273433116  | 0.784695054 | 0.881679375 | no |
| WNT10A       | 0.015193468  | 0.273091576  | 0.784957345 | 0.881922254 | no |
| OR2G6        | -0.015190864 | -0.273044772 | 0.78499329  | 0.881922254 | no |
| HIGD2B       | -0.015180121 | -0.272851617 | 0.785141639 | 0.88204281  | no |
| CLOCK        | -0.015167859 | -0.272631174 | 0.785310956 | 0.882186909 | no |
| SLC34A3      | -0.015151805 | -0.272342541 | 0.785532662 | 0.882389841 | no |
| TIGD2        | -0.015148582 | -0.272284608 | 0.785577164 | 0.882393709 | no |
| CD200R1L     | -0.015142741 | -0.272179584 | 0.785657842 | 0.882438208 | no |
| BEST2        | -0.015133128 | -0.272006768 | 0.7857906   | 0.88248919  | no |
| OR5I1        | -0.015130401 | -0.271957741 | 0.785828265 | 0.88248919  | no |
| SNORA58      | 0.015130119  | 0.271952673  | 0.785832158 | 0.88248919  | no |
| ARL6IP4      | 0.015127562  | 0.271906688  | 0.785867485 | 0.88248919  | no |
| LOC339298    | 0.015124054  | 0.271843621  | 0.785915937 | 0.882497487 | no |
| SNORA54      | -0.0151194   | -0.27175995  | 0.785980219 | 0.882523558 | no |
| VLDLR        | 0.015105755  | 0.271514641  | 0.786168691 | 0.882607923 | no |
| CASC5        | -0.015105551 | -0.271510976 | 0.786171507 | 0.882607923 | no |
| C21orf2      | -0.01510504  | -0.271501794 | 0.786178562 | 0.882607923 | no |
| RAN          | 0.015092832  | 0.27128231   | 0.786347203 | 0.88270832  | no |
| CRISP3       | -0.015089834 | -0.271228404 | 0.786388624 | 0.88270832  | no |
| FSCN1        | 0.015089647  | 0.271225039  | 0.78639121  | 0.88270832  | no |
| RAB10        | 0.01507951   | 0.271042804  | 0.786531241 | 0.882819392 | no |
| PHKG1        | -0.015073659 | -0.270937609 | 0.786612077 | 0.882864015 | no |
| GJB1         | -0.015063841 | -0.270761096 | 0.786747722 | 0.882948332 | no |
| OSTCP1       | 0.015062274  | 0.270732924  | 0.786769372 | 0.882948332 | no |
| CDRT4        | -0.0150553   | -0.270607547 | 0.786865725 | 0.883010354 | no |
| EPOR         | 0.01504605   | 0.27044124   | 0.786993538 | 0.883047416 | no |
| DSCR10       | -0.01504441  | -0.270411766 | 0.787016191 | 0.883047416 | no |
| LOC200726    | 0.015042269  | 0.270373271  | 0.787045777 | 0.883047416 | no |
| ABCB9        | -0.015041015 | -0.270350721 | 0.787063108 | 0.883047416 | no |
| STX18        | 0.015035987  | 0.270260336  | 0.787132576 | 0.883079254 | no |
| LCE1A        | -0.015018211 | -0.269940747 | 0.787378221 | 0.883289648 | no |
| NUDT4P1      | -0.015016468 | -0.269909405 | 0.787402312 | 0.883289648 | no |
| CNR2         | 0.015010994  | 0.269810994  | 0.787477958 | 0.883297691 | no |
| TMEM207      | -0.015010001 | -0.269793139 | 0.787491683 | 0.883297691 | no |
| ELANE        | -0.014994811 | -0.269520058 | 0.787701605 | 0.883458078 | no |
| TSPYL5       | 0.014991297  | 0.269456883  | 0.787750171 | 0.883458078 | no |
| NPTX2        | -0.014989454 | -0.269423745 | 0.787775646 | 0.883458078 | no |
| TGIF2LY      | -0.014985524 | -0.269353098 | 0.787829958 | 0.883458078 | no |
| PTPMT1       | -0.014984085 | -0.269327224 | 0.78784985  | 0.883458078 | no |
| CDC25C       | 0.014981808  | 0.269286284  | 0.787881323 | 0.883458078 | no |
| PTTG3P       | -0.014966258 | -0.269006726 | 0.788096254 | 0.883652976 | no |
| EIF4EBP1     | 0.014953792  | 0.268782606  | 0.788268575 | 0.883759072 | no |
| TRIM39-RPP21 | -0.014953463 | -0.268776693 | 0.788273122 | 0.883759072 | no |
| OR52N5       | 0.014946747  | 0.268655942  | 0.788365969 | 0.88381706  | no |
| PITPNA       | -0.014936524 | -0.268472152 | 0.788507293 | 0.883912313 | no |
| FMO6P        | -0.01493465  | -0.268438469 | 0.788533194 | 0.883912313 | no |
| XRCC2        | -0.01493083  | -0.268369795 | 0.788586003 | 0.883921876 | no |
| CD164L2      | -0.014925667 | -0.268276977 | 0.78865738  | 0.883921876 | no |
| FAM21C       | -0.014925108 | -0.268266918 | 0.788665115 | 0.883921876 | no |

|              |              |              |             |             |    |
|--------------|--------------|--------------|-------------|-------------|----|
| LDB3         | -0.014903863 | -0.267884963 | 0.788958856 | 0.884204984 | no |
| PTGFR        | -0.014892407 | -0.267679021 | 0.789117247 | 0.88433638  | no |
| MMAB         | 0.014849804  | 0.266913094  | 0.789706403 | 0.88495048  | no |
| APOA4        | -0.014818861 | -0.266356798 | 0.790134385 | 0.885383913 | no |
| RPP38        | -0.014807161 | -0.266146445 | 0.790296236 | 0.885465654 | no |
| IVD          | 0.014804414  | 0.266097059  | 0.790334235 | 0.885465654 | no |
| SLC12A2      | -0.014803617 | -0.266082735 | 0.790345257 | 0.885465654 | no |
| PTPLB        | -0.014801526 | -0.266045149 | 0.790374178 | 0.885465654 | no |
| TEX26-AS1    | 0.014796888  | 0.265961754  | 0.790438348 | 0.885465654 | no |
| ARNTL        | 0.014795717  | 0.265940709  | 0.790454542 | 0.885465654 | no |
| BUB1B        | -0.014784936 | -0.265746879 | 0.790603695 | 0.885545731 | no |
| BRIX1        | -0.014784593 | -0.265740716 | 0.790608438 | 0.885545731 | no |
| BSCL2        | 0.014780115  | 0.26566022   | 0.790670383 | 0.88556896  | no |
| ZNF570       | -0.014771066 | -0.265497536 | 0.790795577 | 0.885663023 | no |
| C21orf90     | -0.014764102 | -0.265372325 | 0.790891939 | 0.885724787 | no |
| KARS         | -0.014736129 | -0.264869422 | 0.791278999 | 0.886074371 | no |
| STARD6       | 0.014735583  | 0.264859607  | 0.791286554 | 0.886074371 | no |
| TEAD2        | -0.014727593 | -0.26471596  | 0.791397123 | 0.886106891 | no |
| BIRC5        | -0.014727525 | -0.264714744 | 0.791398058 | 0.886106891 | no |
| PTTG1        | 0.014715045  | 0.264490374  | 0.791570769 | 0.886211543 | no |
| LIMS3-LOC440 | 0.014711725  | 0.26443069   | 0.791616714 | 0.886211543 | no |
| RSPRY1       | 0.014710754  | 0.264413239  | 0.791630147 | 0.886211543 | no |
| PDE4C        | -0.014708715 | -0.264376581 | 0.791658366 | 0.886211543 | no |
| HIST1H1B     | -0.014705873 | -0.264325478 | 0.791697706 | 0.886211543 | no |
| NDUFS8       | -0.014699783 | -0.264215997 | 0.791781988 | 0.886225359 | no |
| OR12D3       | 0.014696435  | 0.264155806  | 0.791828325 | 0.886225359 | no |
| CST5         | 0.014696042  | 0.264148746  | 0.791833761 | 0.886225359 | no |
| RAX          | 0.014683131  | 0.263916636  | 0.792012457 | 0.886318946 | no |
| OR4N5        | -0.014678618 | -0.263835488 | 0.792074933 | 0.886318946 | no |
| RDH8         | 0.014678138  | 0.26382686   | 0.792081576 | 0.886318946 | no |
| MIR10A       | 0.014677426  | 0.263814065  | 0.792091427 | 0.886318946 | no |
| OR13C3       | 0.014672973  | 0.263734004  | 0.792153068 | 0.886318946 | no |
| BLOC1S5      | -0.014672123 | -0.26371873  | 0.792164828 | 0.886318946 | no |
| KRTAP10-5    | -0.014666372 | -0.263615344 | 0.79224443  | 0.88634022  | no |
| CHCHD3       | 0.01466401   | 0.263572866  | 0.792277137 | 0.88634022  | no |
| SERPINB10    | -0.014661811 | -0.263533342 | 0.792307569 | 0.88634022  | no |
| CCNB2        | -0.014656175 | -0.263432018 | 0.792385587 | 0.886381359 | no |
| ACTR6        | 0.014622457  | 0.262825831  | 0.792852388 | 0.886834834 | no |
| OR51L1       | -0.014620932 | -0.26279841  | 0.792873505 | 0.886834834 | no |
| MTRF1L       | 0.01461695   | 0.262726819  | 0.79292864  | 0.886840479 | no |
| CRELD1       | -0.014613472 | -0.262664307 | 0.792976783 | 0.886840479 | no |
| MPLKIP       | 0.014611626  | 0.262631111  | 0.793002349 | 0.886840479 | no |
| KIR2DL1      | 0.014606555  | 0.262539947  | 0.793072561 | 0.886857029 | no |
| OR5T3        | 0.014604308  | 0.262499555  | 0.79310367  | 0.886857029 | no |
| GALP         | 0.014601616  | 0.262451155  | 0.793140948 | 0.886857029 | no |
| RACGAP1P     | 0.014586732  | 0.262183566  | 0.793347052 | 0.887041334 | no |
| MRPS6        | -0.014575451 | -0.261980754 | 0.793503272 | 0.887167923 | no |
| LOC653486    | -0.014572594 | -0.261929399 | 0.793542831 | 0.887167923 | no |
| SNORA67      | 0.014564551  | 0.261784806  | 0.793654213 | 0.887204222 | no |
| MBD1         | -0.014564288 | -0.261780065 | 0.793657865 | 0.887204222 | no |
| NREP-AS1     | 0.01455649   | 0.261639891  | 0.793765848 | 0.887252503 | no |

|           |              |              |             |             |    |
|-----------|--------------|--------------|-------------|-------------|----|
| USP6NL    | 0.014553139  | 0.261579641  | 0.793812262 | 0.887252503 | no |
| PAX2      | 0.014550688  | 0.261535582  | 0.793846205 | 0.887252503 | no |
| ZBTB9     | -0.014549245 | -0.261509634 | 0.793866194 | 0.887252503 | no |
| EBNA1BP2  | -0.014545682 | -0.261445573 | 0.793915547 | 0.88726152  | no |
| OR52B2    | 0.014531516  | 0.261190897  | 0.794111756 | 0.887434649 | no |
| GMCL1     | -0.014516398 | -0.260919117 | 0.794321157 | 0.887529532 | no |
| MAPT      | -0.014509701 | -0.260798717 | 0.794413927 | 0.887529532 | no |
| C2orf71   | 0.014508724  | 0.260781151  | 0.794427462 | 0.887529532 | no |
| BAZ1A     | 0.014505987  | 0.260731937  | 0.794465384 | 0.887529532 | no |
| OR56A1    | 0.014505614  | 0.260725241  | 0.794470543 | 0.887529532 | no |
| ZFP91     | 0.014497547  | 0.260580207  | 0.794582301 | 0.887529532 | no |
| SAA3P     | 0.014496843  | 0.260567552  | 0.794592053 | 0.887529532 | no |
| FBX030    | -0.014496345 | -0.260558598 | 0.794598952 | 0.887529532 | no |
| CATSPERG  | 0.014495366  | 0.260541004  | 0.79461251  | 0.887529532 | no |
| SNORA30   | -0.014495187 | -0.260537789 | 0.794614987 | 0.887529532 | no |
| KPNA7     | -0.01449189  | -0.260478501 | 0.794660674 | 0.887529532 | no |
| PRRC2C    | -0.014489612 | -0.260437548 | 0.794692233 | 0.887529532 | no |
| EFCAB13   | -0.014484379 | -0.260343485 | 0.794764718 | 0.887564361 | no |
| MIR203    | -0.014481045 | -0.260283547 | 0.794810909 | 0.887569823 | no |
| OR4C6     | -0.014469779 | -0.260081007 | 0.794966997 | 0.887669312 | no |
| CAPN6     | -0.014468653 | -0.26006075  | 0.794982608 | 0.887669312 | no |
| C19orf53  | -0.014459587 | -0.25989777  | 0.795108217 | 0.88776344  | no |
| ANKRD30A  | -0.014431402 | -0.259391072 | 0.795498761 | 0.888153352 | no |
| OR10R2    | -0.014428193 | -0.259333369 | 0.79554324  | 0.888156871 | no |
| KRT75     | -0.014416953 | -0.259131299 | 0.795699005 | 0.888269377 | no |
| RPS26P11  | -0.014413794 | -0.259074518 | 0.795742775 | 0.888269377 | no |
| OR4L1     | -0.014410338 | -0.259012376 | 0.795790679 | 0.888269377 | no |
| THEG      | 0.014408991  | 0.258988167  | 0.795809342 | 0.888269377 | no |
| C5orf52   | -0.014402725 | -0.258875519 | 0.795896184 | 0.88832017  | no |
| ZC2HC1C   | -0.014386914 | -0.258591269 | 0.796115325 | 0.888518615 | no |
| CD9       | 0.014370172  | 0.258290288  | 0.796347382 | 0.888702963 | no |
| FZD3      | 0.014366644  | 0.258226859  | 0.796396289 | 0.888702963 | no |
| C1orf123  | -0.014361878 | -0.258141171 | 0.796462359 | 0.888702963 | no |
| CRTC3     | -0.014357644 | -0.258065063 | 0.796521044 | 0.888702963 | no |
| PRKCI     | -0.01435731  | -0.25805906  | 0.796525673 | 0.888702963 | no |
| C14orf178 | -0.014352761 | -0.257977273 | 0.796588737 | 0.888702963 | no |
| NOL11     | 0.014351321  | 0.257951383  | 0.796608701 | 0.888702963 | no |
| TACC3     | 0.014351132  | 0.257947987  | 0.79661132  | 0.888702963 | no |
| AK1       | -0.014339276 | -0.257734852 | 0.796775674 | 0.888840177 | no |
| RBP7      | -0.014335159 | -0.257660839 | 0.796832749 | 0.888857709 | no |
| TRIM43B   | 0.014328413  | 0.257539557  | 0.796926278 | 0.8889159   | no |
| ALOX12    | -0.01432489  | -0.257476225 | 0.796975119 | 0.888924242 | no |
| DMD       | -0.014312747 | -0.257257918 | 0.797143482 | 0.889026735 | no |
| OR8G2     | -0.01430394  | -0.257099589 | 0.797265594 | 0.889026735 | no |
| ZNF544    | 0.014299993  | 0.25702862   | 0.797320331 | 0.889026735 | no |
| DNAJB8    | -0.01429805  | -0.256993702 | 0.797347263 | 0.889026735 | no |
| PGK2      | -0.01429074  | -0.256862283 | 0.797448627 | 0.889026735 | no |
| FBX07     | 0.014290703  | 0.256861614  | 0.797449143 | 0.889026735 | no |
| DCTN3     | -0.014290506 | -0.256858068 | 0.797451878 | 0.889026735 | no |
| UTP18     | 0.014287937  | 0.256811881  | 0.797487503 | 0.889026735 | no |
| HMG1A1    | 0.014286518  | 0.256786376  | 0.797507176 | 0.889026735 | no |

|              |              |              |             |             |    |
|--------------|--------------|--------------|-------------|-------------|----|
| STK32B       | 0.014284813  | 0.256755729  | 0.797530816 | 0.889026735 | no |
| POT1         | 0.014283273  | 0.256728036  | 0.797552176 | 0.889026735 | no |
| ABHD1        | 0.014282293  | 0.256710424  | 0.797565761 | 0.889026735 | no |
| DBX2         | 0.014277226  | 0.256619321  | 0.797636034 | 0.889026735 | no |
| RHOB         | -0.014276496 | -0.256606201 | 0.797646155 | 0.889026735 | no |
| OR9G9        | 0.014244891  | 0.256038013  | 0.798084469 | 0.889469135 | no |
| PCDHA10      | -0.014237602 | -0.255906987 | 0.798185556 | 0.88949163  | no |
| RHBDD3       | 0.014236405  | 0.255885457  | 0.798202166 | 0.88949163  | no |
| PDZD9        | 0.014233601  | 0.255835049  | 0.798241057 | 0.88949163  | no |
| C5           | 0.014231499  | 0.255797263  | 0.79827021  | 0.88949163  | no |
| UGT1A7       | -0.014214247 | -0.255487103 | 0.798509517 | 0.889682319 | no |
| RPS8         | -0.014213192 | -0.255468153 | 0.798524138 | 0.889682319 | no |
| DNAH3        | 0.014204033  | 0.255303482  | 0.798651201 | 0.889755769 | no |
| STK11        | 0.014202471  | 0.255275406  | 0.798672865 | 0.889755769 | no |
| AXDND1       | 0.014175667  | 0.254793538  | 0.799044713 | 0.890123882 | no |
| IRG1         | 0.014154307  | 0.254409532  | 0.799341076 | 0.890407872 | no |
| CROCC        | 0.014146733  | 0.254273377  | 0.799446163 | 0.890478775 | no |
| C12orf36     | 0.01414008   | 0.254153769  | 0.799538482 | 0.890534344 | no |
| OPRM1        | 0.014137165  | 0.25410137   | 0.799578927 | 0.890534344 | no |
| TBATA        | -0.014129052 | -0.253955512 | 0.799691511 | 0.890613581 | no |
| LOC100093631 | 0.014114908  | 0.253701231  | 0.799887795 | 0.890741452 | no |
| MIR192       | -0.014112512 | -0.25365816  | 0.799921044 | 0.890741452 | no |
| SRP72        | -0.014111818 | -0.253645691 | 0.79993067  | 0.890741452 | no |
| METTL21B     | -0.01410806  | -0.253578129 | 0.799982825 | 0.890753375 | no |
| SESN3        | -0.01409177  | -0.253285268 | 0.800208913 | 0.890958955 | no |
| MMP21        | -0.014086842 | -0.253196684 | 0.800277302 | 0.890986123 | no |
| TMPRSS4      | -0.014084038 | -0.253146262 | 0.800316231 | 0.890986123 | no |
| ISY1-RAB43   | -0.01407998  | -0.253073314 | 0.800372551 | 0.891002667 | no |
| MAGEB4       | -0.01407339  | -0.252954849 | 0.800464015 | 0.891058331 | no |
| SBDS         | -0.014068558 | -0.252867976 | 0.80053109  | 0.891086841 | no |
| LENG1        | -0.014060729 | -0.252727228 | 0.800639764 | 0.891161651 | no |
| OAZ2         | -0.014050228 | -0.252538445 | 0.800785533 | 0.891271384 | no |
| C9orf171     | -0.014047652 | -0.252492134 | 0.800821294 | 0.891271384 | no |
| SDR42E1      | 0.014033187  | 0.252232083  | 0.801022106 | 0.891441368 | no |
| FGFBP1       | 0.014030674  | 0.252186915  | 0.801056987 | 0.891441368 | no |
| PDHA2        | -0.014020982 | -0.252012684 | 0.801191538 | 0.891509248 | no |
| RBM48        | -0.014019336 | -0.251983085 | 0.801214397 | 0.891509248 | no |
| C17orf59     | 0.014017317  | 0.251946782  | 0.801242433 | 0.891509248 | no |
| PRPF4        | 0.014011976  | 0.251850773  | 0.80131658  | 0.891515774 | no |
| SCG2         | 0.014010919  | 0.251831759  | 0.801331264 | 0.891515774 | no |
| BZW2         | 0.013998828  | 0.251614404  | 0.801499135 | 0.891656378 | no |
| KDM4A-AS1    | 0.013979194  | 0.251261424  | 0.801771771 | 0.891892716 | no |
| NUP88        | 0.013977551  | 0.251231898  | 0.801794578 | 0.891892716 | no |
| FCRLB        | 0.013968071  | 0.251061461  | 0.801926231 | 0.891950373 | no |
| AES          | 0.013967841  | 0.251057336  | 0.801929417 | 0.891950373 | no |
| TMEM247      | -0.013961788 | -0.250948508 | 0.802013483 | 0.891951701 | no |
| IL17A        | 0.013960358  | 0.250922817  | 0.80203333  | 0.891951701 | no |
| MBL2         | -0.013958789 | -0.250894607 | 0.802055121 | 0.891951701 | no |
| LOC147093    | 0.013940132  | 0.250559204  | 0.802314228 | 0.89215138  | no |
| RAD51AP2     | 0.013937243  | 0.250507265  | 0.802354354 | 0.89215138  | no |
| OR51B4       | 0.013936893  | 0.250500975  | 0.802359214 | 0.89215138  | no |

|              |              |              |             |             |    |
|--------------|--------------|--------------|-------------|-------------|----|
| POM121L12    | -0.013928826 | -0.25035594  | 0.802471266 | 0.892191914 | no |
| LINC00670    | -0.013928291 | -0.25034632  | 0.802478698 | 0.892191914 | no |
| KL           | -0.013911052 | -0.250036422 | 0.802718134 | 0.892341406 | no |
| ZNF837       | 0.013910795  | 0.250031789  | 0.802721713 | 0.892341406 | no |
| PRR11        | 0.013909642  | 0.25001107   | 0.802737723 | 0.892341406 | no |
| TMEM44       | 0.013892935  | 0.249710711  | 0.802969807 | 0.892511374 | no |
| MIR499A      | 0.013892053  | 0.249694868  | 0.80298205  | 0.892511374 | no |
| GLE1         | 0.013889666  | 0.249651951  | 0.803015213 | 0.892511374 | no |
| UPB1         | 0.013882208  | 0.249517868  | 0.803118825 | 0.892569524 | no |
| TRPM5        | -0.013879921 | -0.249476755 | 0.803150596 | 0.892569524 | no |
| DDX11L10     | 0.013867865  | 0.249260019  | 0.803318086 | 0.892709499 | no |
| DPCR1        | 0.013857477  | 0.249073283  | 0.803462401 | 0.892788167 | no |
| NYNRIN       | 0.013855928  | 0.249045435  | 0.803483923 | 0.892788167 | no |
| PTPN21       | 0.013853799  | 0.249007159  | 0.803513505 | 0.892788167 | no |
| SLBP         | 0.013845244  | 0.248853349  | 0.803632381 | 0.892835292 | no |
| LOC100507462 | -0.013844767 | -0.248844776 | 0.803639007 | 0.892835292 | no |
| LOC149134    | 0.013831098  | 0.248599056  | 0.803828927 | 0.893000127 | no |
| OR51B5       | 0.01382345   | 0.248461553  | 0.803935209 | 0.893072035 | no |
| LOC100129617 | -0.013819208 | -0.248385291 | 0.803994157 | 0.893091355 | no |
| UBTFL1       | 0.013811404  | 0.248244995  | 0.804102605 | 0.893165655 | no |
| MIR548I2     | -0.013803051 | -0.248094842 | 0.804218676 | 0.893248414 | no |
| GRHL3        | -0.013799197 | -0.248025554 | 0.804272239 | 0.893261741 | no |
| GOLGA7       | 0.013789447  | 0.24785027   | 0.804407744 | 0.893323716 | no |
| LRRC27       | -0.013785588 | -0.2477809   | 0.804461374 | 0.893323716 | no |
| CASP3        | 0.013783548  | 0.247744219  | 0.804489732 | 0.893323716 | no |
| ZNF362       | -0.013783218 | -0.247738297 | 0.804494309 | 0.893323716 | no |
| OR51A7       | -0.013774774 | -0.247586498 | 0.804611668 | 0.893383766 | no |
| FIBIN        | 0.013772417  | 0.247544116  | 0.804644435 | 0.893383766 | no |
| RAB3GAP1     | -0.013766968 | -0.247446171 | 0.804720161 | 0.893383766 | no |
| TAS2R60      | 0.013762282  | 0.24736193   | 0.804785293 | 0.893383766 | no |
| KRTAP4-2     | -0.013760254 | -0.247325469 | 0.804813484 | 0.893383766 | no |
| SPINK4       | 0.01375789   | 0.24728297   | 0.804846343 | 0.893383766 | no |
| RFWD2        | 0.013757252  | 0.24727149   | 0.80485522  | 0.893383766 | no |
| COL4A3       | 0.013754545  | 0.247222833  | 0.804892841 | 0.893383766 | no |
| C2CD4D       | -0.01375241  | -0.24718445  | 0.804922519 | 0.893383766 | no |
| OR6Q1        | -0.013727864 | -0.246743185 | 0.805263728 | 0.893716318 | no |
| DNAH12       | -0.013724586 | -0.246684245 | 0.805309305 | 0.893720748 | no |
| DMGDH        | 0.013720857  | 0.24661721   | 0.805361145 | 0.893725284 | no |
| KRT20        | 0.013718309  | 0.246571407  | 0.805396565 | 0.893725284 | no |
| C21orf15     | -0.013713689 | -0.246488355 | 0.805460792 | 0.893750406 | no |
| OR5C1        | -0.013705845 | -0.246347338 | 0.805569848 | 0.893809381 | no |
| CLCN1        | -0.013703883 | -0.246312075 | 0.80559712  | 0.893809381 | no |
| PLCB3        | -0.01369667  | -0.246182396 | 0.805697412 | 0.89386588  | no |
| FIGN         | 0.013694238  | 0.246138671  | 0.805731229 | 0.89386588  | no |
| HOXA-AS4     | 0.013687287  | 0.246013715  | 0.805827872 | 0.89392695  | no |
| SNORA11C     | -0.013670122 | -0.245705142 | 0.806066541 | 0.894112591 | no |
| ZNF557       | 0.013669268  | 0.245689778  | 0.806078426 | 0.894112591 | no |
| APAF1        | 0.013663713  | 0.245589917  | 0.806155668 | 0.894115188 | no |
| SLC18A3      | -0.013663115 | -0.245579177 | 0.806163975 | 0.894115188 | no |
| BCL2L13      | 0.013657509  | 0.245478393  | 0.806241935 | 0.894155508 | no |
| ITCH         | -0.013628161 | -0.244950797 | 0.806650075 | 0.894527999 | no |

|              |              |              |             |             |    |
|--------------|--------------|--------------|-------------|-------------|----|
| PAN3         | -0.013627372 | -0.244936611 | 0.80666105  | 0.894527999 | no |
| ZNF805       | -0.013616761 | -0.244745848 | 0.806808634 | 0.894586154 | no |
| MRGPRX4      | -0.013615583 | -0.244724675 | 0.806825015 | 0.894586154 | no |
| SPACA7       | -0.013614623 | -0.244707413 | 0.806838371 | 0.894586154 | no |
| RELA         | 0.01359657   | 0.24438287   | 0.807089473 | 0.8948184   | no |
| TMEM68       | -0.01358691  | -0.244209216 | 0.80722384  | 0.894921204 | no |
| ARHGAP42     | -0.013581741 | -0.244116289 | 0.807295745 | 0.894954754 | no |
| EPYC         | -0.013572882 | -0.24395704  | 0.807418973 | 0.895033086 | no |
| SYF2         | 0.013570674  | 0.243917333  | 0.807449699 | 0.895033086 | no |
| LOC641746    | -0.013556739 | -0.243666826 | 0.807643555 | 0.895194288 | no |
| GAR1         | 0.013550086  | 0.243547232  | 0.807736108 | 0.895194288 | no |
| MEIS1        | 0.013548861  | 0.243525208  | 0.807753152 | 0.895194288 | no |
| OR10AG1      | -0.013548244 | -0.243514106 | 0.807761744 | 0.895194288 | no |
| CDKAL1       | 0.013541665  | 0.243395833  | 0.807853278 | 0.895216166 | no |
| NAT8B        | 0.013540581  | 0.243376357  | 0.807868351 | 0.895216166 | no |
| NUDT16L1     | -0.01353683  | -0.243308919 | 0.807920543 | 0.895216166 | no |
| CPT1A        | 0.013534849  | 0.243273306  | 0.807948107 | 0.895216166 | no |
| POMZP3       | -0.013518644 | -0.242981987 | 0.808173581 | 0.895391768 | no |
| MFN2         | 0.013513553  | 0.242890469  | 0.808244417 | 0.895391768 | no |
| TMEM233      | 0.013512563  | 0.242872667  | 0.808258197 | 0.895391768 | no |
| LEMD1-AS1    | -0.013507204 | -0.242776326 | 0.808332769 | 0.895391768 | no |
| LOC100131096 | 0.01350596   | 0.242753961  | 0.80835008  | 0.895391768 | no |
| SNORD94      | -0.013503043 | -0.242701535 | 0.808390661 | 0.895391768 | no |
| NFATC1       | -0.013502499 | -0.242691749 | 0.808398236 | 0.895391768 | no |
| TKTL2        | -0.013488826 | -0.242445955 | 0.808588501 | 0.895513301 | no |
| C11orf93     | -0.013488625 | -0.242442341 | 0.808591299 | 0.895513301 | no |
| OR52A5       | -0.013477449 | -0.242241416 | 0.80874684  | 0.895639408 | no |
| DGKZ         | 0.013466902  | 0.24205182   | 0.808893618 | 0.895740761 | no |
| C16orf74     | 0.013464497  | 0.242008587  | 0.808927089 | 0.895740761 | no |
| KRT1         | -0.013461427 | -0.241953399 | 0.808969815 | 0.895740761 | no |
| PPP2R1B      | 0.013458894  | 0.241907849  | 0.80900508  | 0.895740761 | no |
| PAK2         | -0.013452245 | -0.241788332 | 0.809097613 | 0.895797063 | no |
| APOBEC3A     | 0.013437911  | 0.241530641  | 0.809297131 | 0.895956765 | no |
| TSHZ2        | 0.013435892  | 0.241494342  | 0.809325237 | 0.895956765 | no |
| PGRMC1       | -0.013432797 | -0.241438703 | 0.809368318 | 0.895958305 | no |
| HSFX1        | 0.01342941   | 0.241377827  | 0.809415455 | 0.895964334 | no |
| FBXO24       | -0.013421119 | -0.241228773 | 0.809530871 | 0.895966824 | no |
| IPO13        | -0.013420855 | -0.241224032 | 0.809534542 | 0.895966824 | no |
| CLCNKA       | 0.013419492  | 0.241199529  | 0.809553515 | 0.895966824 | no |
| FAM9C        | -0.013417269 | -0.24115956  | 0.809584465 | 0.895966824 | no |
| RBPMS2       | 0.013409566  | 0.241021084  | 0.809691696 | 0.896039353 | no |
| LINC00535    | -0.013395883 | -0.240775105 | 0.809882181 | 0.896204004 | no |
| ZNF580       | 0.013389836  | 0.240666387  | 0.809966376 | 0.896205593 | no |
| MST1P2       | -0.01338938  | -0.240658199 | 0.809972717 | 0.896205593 | no |
| NDC80        | 0.013385599  | 0.240590221  | 0.810025363 | 0.896205593 | no |
| IL17B        | -0.013381907 | -0.240523863 | 0.810076755 | 0.896205593 | no |
| DDX11L5      | 0.013380803  | 0.240504017  | 0.810092125 | 0.896205593 | no |
| VDAC2        | -0.013375416 | -0.240407167 | 0.810167133 | 0.896242439 | no |
| FAM170B-AS1  | 0.013366007  | 0.240238015  | 0.810298142 | 0.89630822  | no |
| PCSK4        | -0.013360472 | -0.240138527 | 0.810375199 | 0.89630822  | no |
| ZNF625       | -0.013360166 | -0.240133026 | 0.81037946  | 0.89630822  | no |

|           |              |              |             |             |    |
|-----------|--------------|--------------|-------------|-------------|----|
| AIF1L     | -0.013359164 | -0.240115    | 0.810393422 | 0.89630822  | no |
| RNF32     | -0.013349014 | -0.239932539 | 0.810534749 | 0.896389937 | no |
| PCDHGA7   | -0.01334715  | -0.239899034 | 0.810560702 | 0.896389937 | no |
| TAS2R40   | -0.013344871 | -0.239858065 | 0.810592436 | 0.896389937 | no |
| MAGEE2    | -0.013338316 | -0.239740216 | 0.810683722 | 0.896415998 | no |
| TUFT1     | 0.0133321    | 0.239628483  | 0.810770273 | 0.896415998 | no |
| DFFB      | 0.013331373  | 0.239615404  | 0.810780405 | 0.896415998 | no |
| PRKAR1A   | 0.013331198  | 0.239612251  | 0.810782847 | 0.896415998 | no |
| COPRS     | -0.013327463 | -0.239545112 | 0.810834856 | 0.896427383 | no |
| OXT       | 0.013321916  | 0.239445401  | 0.810912098 | 0.896437182 | no |
| GABRG3    | 0.013320836  | 0.239425979  | 0.810927144 | 0.896437182 | no |
| C9orf152  | 0.013308065  | 0.239196394  | 0.811105002 | 0.896587676 | no |
| NACC1     | -0.013304213 | -0.239127158 | 0.811158641 | 0.896600852 | no |
| ASB11     | -0.013291484 | -0.238898315 | 0.811335937 | 0.896692048 | no |
| OR2T2     | -0.013290871 | -0.238887308 | 0.811344465 | 0.896692048 | no |
| SNORA34   | -0.013285316 | -0.23878744  | 0.811421841 | 0.896692048 | no |
| UGT1A9    | -0.01328124  | -0.238714173 | 0.811478608 | 0.896692048 | no |
| ZNF697    | -0.013280821 | -0.238706633 | 0.81148445  | 0.896692048 | no |
| INSL4     | 0.013280315  | 0.238697545  | 0.811491491 | 0.896692048 | no |
| C14orf23  | -0.013258366 | -0.238302968 | 0.811797227 | 0.896962716 | no |
| MYPN      | -0.013256738 | -0.23827369  | 0.811819914 | 0.896962716 | no |
| NKIRAS2   | -0.013247163 | -0.238101557 | 0.811953301 | 0.897063973 | no |
| TIPIN     | 0.013241117  | 0.237992879  | 0.812037519 | 0.897110899 | no |
| TPRG1-AS2 | -0.013224011 | -0.237685369 | 0.812275829 | 0.897328048 | no |
| MYL7      | 0.01321899   | 0.237595104  | 0.812345785 | 0.897338976 | no |
| DHCR24    | -0.013217307 | -0.237564853 | 0.81236923  | 0.897338976 | no |
| ABCB7     | -0.013197933 | -0.237216563 | 0.812639172 | 0.897591019 | no |
| SEC14L1P1 | 0.013167118  | 0.236662604  | 0.813068564 | 0.898019145 | no |
| AHSA2     | -0.013157607 | -0.236491629 | 0.813201104 | 0.898119376 | no |
| SMAD1     | -0.013153008 | -0.236408942 | 0.813265205 | 0.898144014 | no |
| ADAM21P1  | -0.013139192 | -0.236160578 | 0.81345775  | 0.898269969 | no |
| PGLYRP3   | -0.013135855 | -0.236100595 | 0.813504254 | 0.898269969 | no |
| MORC3     | -0.013134107 | -0.236069172 | 0.813528616 | 0.898269969 | no |
| CREB1     | -0.013132828 | -0.236046174 | 0.813546447 | 0.898269969 | no |
| YRDC      | -0.013127874 | -0.235957119 | 0.813615491 | 0.898300052 | no |
| RSPO4     | 0.013124607  | 0.235898385  | 0.813661029 | 0.89830418  | no |
| LOC440563 | 0.013119006  | 0.235797694  | 0.813739097 | 0.898344221 | no |
| LOC91948  | 0.013108832  | 0.235614812  | 0.813880897 | 0.898454611 | no |
| PRAMEF12  | 0.013083872  | 0.235166108  | 0.814228831 | 0.898767265 | no |
| COMMD6    | 0.013082514  | 0.235141695  | 0.814247762 | 0.898767265 | no |
| UNQ6975   | 0.013068801  | 0.234895177  | 0.814438933 | 0.898920358 | no |
| UBE2A     | 0.013066565  | 0.234854971  | 0.814470114 | 0.898920358 | no |
| PAGR1     | -0.013056662 | -0.234676949 | 0.814608175 | 0.898925769 | no |
| PPM1G     | 0.01305475   | 0.23464259   | 0.814634822 | 0.898925769 | no |
| NBPF10    | -0.013048665 | -0.234533194 | 0.814719666 | 0.898925769 | no |
| GFRA2     | 0.013044875  | 0.23446506   | 0.814772509 | 0.898925769 | no |
| ARHGAP8   | 0.013039761  | 0.234373122  | 0.814843816 | 0.898925769 | no |
| HBA1      | -0.013038208 | -0.234345211 | 0.814865464 | 0.898925769 | no |
| LINC00615 | -0.013036239 | -0.234309815 | 0.814892918 | 0.898925769 | no |
| FAM108C1  | 0.013034847  | 0.234284786  | 0.81491233  | 0.898925769 | no |
| NDUFA3    | 0.01303455   | 0.234279447  | 0.814916471 | 0.898925769 | no |

|              |              |              |             |             |    |
|--------------|--------------|--------------|-------------|-------------|----|
| CENPE        | -0.013033286 | -0.234256723 | 0.814934097 | 0.898925769 | no |
| ZNF180       | -0.013032001 | -0.234233635 | 0.814952005 | 0.898925769 | no |
| SGOL1        | -0.013030212 | -0.23420147  | 0.814976953 | 0.898925769 | no |
| B3GALT5      | -0.013019122 | -0.234002098 | 0.815131597 | 0.899036852 | no |
| SPAG8        | 0.013016989  | 0.233963768  | 0.815161328 | 0.899036852 | no |
| TTC37        | 0.013012788  | 0.233888235  | 0.815219917 | 0.899055332 | no |
| CLCN5        | -0.012984263 | -0.233375446 | 0.815617708 | 0.899447874 | no |
| IQCF6        | -0.012969345 | -0.233107283 | 0.815825751 | 0.899630432 | no |
| SHOC2        | 0.012964198  | 0.233014743  | 0.815897548 | 0.899630432 | no |
| USP29        | -0.012963388 | -0.233000196 | 0.815908834 | 0.899630432 | no |
| GPR33        | -0.012957389 | -0.232892341 | 0.815992515 | 0.899653894 | no |
| UBQLN3       | -0.01295586  | -0.23286486  | 0.816013837 | 0.899653894 | no |
| MLF1IP       | 0.012952782  | 0.232809521  | 0.816056773 | 0.899655079 | no |
| HBB          | 0.01294571   | 0.232682406  | 0.816155402 | 0.899682235 | no |
| TRIML2       | 0.012945013  | 0.232669866  | 0.816165132 | 0.899682235 | no |
| BEST4        | 0.012938392  | 0.23255085   | 0.816257479 | 0.899692859 | no |
| C12orf66     | 0.012938319  | 0.232549538  | 0.816258497 | 0.899692859 | no |
| NUDT6        | -0.012932746 | -0.232449341 | 0.816336244 | 0.899732408 | no |
| FAM104B      | -0.012921009 | -0.23223836  | 0.81649996  | 0.899850764 | no |
| OR8B12       | -0.012919044 | -0.232203035 | 0.816527372 | 0.899850764 | no |
| TMEM126A     | 0.012915737  | 0.232143587  | 0.816573504 | 0.899855459 | no |
| GHRL         | 0.012908293  | 0.232009761  | 0.816677355 | 0.899889271 | no |
| C9orf92      | 0.01290207   | 0.231897896  | 0.816764167 | 0.899889271 | no |
| CRYBG3       | -0.012890416 | -0.231688387 | 0.816926761 | 0.899889271 | no |
| CRYGB        | -0.012889699 | -0.231675513 | 0.816936753 | 0.899889271 | no |
| GJB5         | -0.012888116 | -0.231647055 | 0.816958839 | 0.899889271 | no |
| GFRAL        | 0.012884136  | 0.231575502  | 0.817014371 | 0.899889271 | no |
| UTF1         | -0.012882533 | -0.231546676 | 0.817036744 | 0.899889271 | no |
| ZDHHC9       | 0.012880145  | 0.231503751  | 0.817070059 | 0.899889271 | no |
| CNDP1        | 0.012879808  | 0.231497703  | 0.817074753 | 0.899889271 | no |
| ST7-AS2      | -0.012879206 | -0.23148687  | 0.817083161 | 0.899889271 | no |
| ZNF57        | -0.012877841 | -0.231462333 | 0.817102204 | 0.899889271 | no |
| RASSF10      | 0.012875624  | 0.231422479  | 0.817133137 | 0.899889271 | no |
| OTOL1        | 0.012873905  | 0.231391581  | 0.817157118 | 0.899889271 | no |
| CENPVP1      | -0.012871519 | -0.231348692 | 0.817190406 | 0.899889271 | no |
| GL01         | -0.01285898  | -0.231123283 | 0.817365362 | 0.900006532 | no |
| OGG1         | -0.012857885 | -0.23110359  | 0.817380647 | 0.900006532 | no |
| ANKS1A       | 0.01283793   | 0.230744878  | 0.81765909  | 0.900266997 | no |
| LIN7C        | 0.012834733  | 0.230687398  | 0.81770371  | 0.900270001 | no |
| EIF2C2       | -0.012826875 | -0.230546132 | 0.817813372 | 0.900330278 | no |
| OR56B4       | 0.012824806  | 0.230508939  | 0.817842245 | 0.900330278 | no |
| PMCHL1       | 0.012821118  | 0.230442646  | 0.817893709 | 0.900340814 | no |
| LOC100507389 | 0.012812866  | 0.230294296  | 0.818008877 | 0.90041651  | no |
| RMRP         | -0.012810186 | -0.230246133 | 0.818046268 | 0.90041651  | no |
| MEPE         | 0.012795731  | 0.229986274  | 0.818248016 | 0.900592446 | no |
| OR6C65       | -0.012788263 | -0.229852018 | 0.818352254 | 0.900658067 | no |
| CPSF2        | -0.012785454 | -0.22980153  | 0.818391454 | 0.900658067 | no |
| FAM25A       | 0.012770884  | 0.229539607  | 0.818594825 | 0.900800687 | no |
| GPX2         | -0.012770164 | -0.22952666  | 0.818604878 | 0.900800687 | no |
| MIS18A       | -0.012753318 | -0.229223829 | 0.818840028 | 0.901013314 | no |
| LOC641515    | -0.012748103 | -0.229130087 | 0.818912822 | 0.90104728  | no |



|              |              |              |             |             |    |
|--------------|--------------|--------------|-------------|-------------|----|
| OR12D2       | -0.012742473 | -0.229028872 | 0.818991422 | 0.901087628 | no |
| DENND4C      | -0.012729105 | -0.228788569 | 0.819178038 | 0.901173177 | no |
| SERPINB3     | -0.012728592 | -0.228779341 | 0.819185205 | 0.901173177 | no |
| TOMM40       | 0.012721852  | 0.228658175  | 0.819279305 | 0.901173177 | no |
| OR8H3        | -0.012721007 | -0.228642992 | 0.819291097 | 0.901173177 | no |
| ZNF880       | -0.012720953 | -0.228642016 | 0.819291855 | 0.901173177 | no |
| PRR21        | 0.012718881  | 0.228604783  | 0.819320772 | 0.901173177 | no |
| ACPT         | -0.012712671 | -0.228493147 | 0.819407474 | 0.901222417 | no |
| LOC732275    | 0.012707542  | 0.22840093   | 0.819479096 | 0.901251665 | no |
| PIK3C2A      | -0.012701772 | -0.228297208 | 0.819559656 | 0.901251665 | no |
| KRTAP22-2    | 0.012701756  | 0.228296925  | 0.819559876 | 0.901251665 | no |
| ODF3         | 0.012697152  | 0.228214159  | 0.819624161 | 0.901261939 | no |
| HIVEP1       | -0.01269508  | -0.22817691  | 0.819653092 | 0.901261939 | no |
| LINC00651    | -0.012691085 | -0.228105098 | 0.81970887  | 0.901277158 | no |
| OR1J2        | 0.012660835  | 0.227561299  | 0.820131283 | 0.901695472 | no |
| ALX1         | 0.012640647  | 0.227198392  | 0.820413211 | 0.901959296 | no |
| LOC100133123 | -0.012634854 | -0.227094266 | 0.820494107 | 0.902002089 | no |
| TMEM98       | 0.012625599  | 0.226927894  | 0.820623366 | 0.90208599  | no |
| C3orf72      | -0.012623379 | -0.226887981 | 0.820654376 | 0.90208599  | no |
| CCDC155      | 0.012594892  | 0.226375884  | 0.821052272 | 0.902382352 | no |
| NAIF1        | -0.012594855 | -0.226375216 | 0.82105279  | 0.902382352 | no |
| IFT122       | 0.012593899  | 0.226358031  | 0.821066145 | 0.902382352 | no |
| ATP13A1      | -0.012592052 | -0.226324833 | 0.821091941 | 0.902382352 | no |
| LOC100271836 | -0.012582818 | -0.226158827 | 0.821220937 | 0.902446837 | no |
| CNOT2        | -0.012581839 | -0.226141245 | 0.8212346   | 0.902446837 | no |
| TBX4         | -0.012562511 | -0.225793796 | 0.821504606 | 0.902671741 | no |
| FAM99A       | -0.012561176 | -0.225769781 | 0.82152327  | 0.902671741 | no |
| ZNF234       | 0.012554702  | 0.225653415  | 0.821613704 | 0.902682478 | no |
| DENND2C      | 0.012554463  | 0.225649113  | 0.821617047 | 0.902682478 | no |
| ANKRD20A2    | -0.012549472 | -0.225559387 | 0.82168678  | 0.902712943 | no |
| TFDP1        | -0.012545738 | -0.225492263 | 0.821738948 | 0.902724108 | no |
| ACOT6        | 0.012538339  | 0.225359263  | 0.821842316 | 0.902791516 | no |
| GRP          | -0.012516542 | -0.224967436 | 0.822146865 | 0.903079901 | no |
| OR5D16       | 0.012504389  | 0.224748964  | 0.822316683 | 0.903220272 | no |
| NDNL2        | 0.012486167  | 0.224421386  | 0.822571327 | 0.903453794 | no |
| CD207        | 0.01247486   | 0.224218133  | 0.822729336 | 0.903581161 | no |
| OR6P1        | 0.012467058  | 0.224077876  | 0.822838376 | 0.903624857 | no |
| LOC63930     | 0.012461519  | 0.223978304  | 0.822915789 | 0.903624857 | no |
| PTH2R        | -0.012460988 | -0.223968764 | 0.822923205 | 0.903624857 | no |
| LOC100652909 | -0.012459979 | -0.223950624 | 0.822937308 | 0.903624857 | no |
| MAFIP        | -0.012450777 | -0.223785215 | 0.823065911 | 0.903683452 | no |
| CAMK1        | -0.012450143 | -0.22377382  | 0.82307477  | 0.903683452 | no |
| APOBEC4      | 0.012440438  | 0.223599351  | 0.823210421 | 0.903786215 | no |
| NDFIP2-AS1   | 0.012430239  | 0.223416013  | 0.823352975 | 0.903874701 | no |
| C18orf62     | 0.012428654  | 0.223387513  | 0.823375135 | 0.903874701 | no |
| MSH3         | 0.012419315  | 0.223219646  | 0.823505664 | 0.903931519 | no |
| MGC45800     | 0.012418933  | 0.223212765  | 0.823511015 | 0.903931519 | no |
| SLC25A25     | -0.012406784 | -0.222994376 | 0.823680837 | 0.904007019 | no |
| CFHR4        | 0.012404985  | 0.222962029  | 0.823705991 | 0.904007019 | no |
| TTY7         | 0.012404985  | 0.222962029  | 0.823705991 | 0.904007019 | no |
| SPZ1         | -0.012397104 | -0.22282037  | 0.823816152 | 0.904036683 | no |

|              |              |              |             |             |    |
|--------------|--------------|--------------|-------------|-------------|----|
| STOML1       | -0.012394704 | -0.222777225 | 0.823849704 | 0.904036683 | no |
| SMARCC2      | -0.012394024 | -0.222764993 | 0.823859217 | 0.904036683 | no |
| NUP160       | -0.012388946 | -0.222673713 | 0.823930203 | 0.904068416 | no |
| SENP6        | -0.01238165  | -0.222542556 | 0.824032204 | 0.904134175 | no |
| VWA5B1       | -0.012354046 | -0.222046336 | 0.82441814  | 0.904429538 | no |
| RAB5C        | 0.012349295  | 0.221960933  | 0.824484567 | 0.904429538 | no |
| EHF          | 0.012342598  | 0.221840541  | 0.82457821  | 0.904429538 | no |
| GAS2L2       | -0.012341324 | -0.221817641 | 0.824596022 | 0.904429538 | no |
| EIF4H        | -0.012337968 | -0.221757308 | 0.824642951 | 0.904429538 | no |
| MRPS24       | -0.012334967 | -0.22170337  | 0.824684907 | 0.904429538 | no |
| N4BP3        | -0.012334701 | -0.221698595 | 0.824688621 | 0.904429538 | no |
| OR4C15       | -0.012332371 | -0.221656712 | 0.824721201 | 0.904429538 | no |
| TGM7         | -0.012331954 | -0.221649214 | 0.824727033 | 0.904429538 | no |
| KLK5         | 0.012326162  | 0.221545096  | 0.824808024 | 0.904429538 | no |
| SP1          | 0.012323609  | 0.221499202  | 0.824843724 | 0.904429538 | no |
| PAX4         | -0.012322462 | -0.221478579 | 0.824859766 | 0.904429538 | no |
| SNAPC5       | 0.012311612  | 0.221283536  | 0.825011492 | 0.904429538 | no |
| CSTF1        | -0.012311376 | -0.2212793   | 0.825014787 | 0.904429538 | no |
| SNORA71A     | 0.012309847  | 0.221251798  | 0.825036182 | 0.904429538 | no |
| SELE         | -0.012309379 | -0.221243395 | 0.825042719 | 0.904429538 | no |
| OR2W3        | -0.012306551 | -0.221192557 | 0.825082268 | 0.904429538 | no |
| SSR4         | 0.0123057    | 0.22117725   | 0.825094176 | 0.904429538 | no |
| GSTO1        | 0.012305212  | 0.221168482  | 0.825100997 | 0.904429538 | no |
| MGC39584     | 0.012300393  | 0.221081857  | 0.825168387 | 0.904438558 | no |
| OR2T11       | -0.012296617 | -0.221013984 | 0.82522119  | 0.904438558 | no |
| CCDC27       | -0.01229224  | -0.22093529  | 0.825282413 | 0.904438558 | no |
| RPS7         | -0.012290996 | -0.22091294  | 0.825299801 | 0.904438558 | no |
| SCARNA20     | -0.012287583 | -0.22085158  | 0.825347539 | 0.904438558 | no |
| MAPRE1       | 0.01228509   | 0.220806759  | 0.82538241  | 0.904438558 | no |
| FOXP1        | -0.012283559 | -0.220779243 | 0.825403817 | 0.904438558 | no |
| CDH19        | -0.012258007 | -0.220319921 | 0.825761194 | 0.904760659 | no |
| OR2T1        | -0.012255217 | -0.220269754 | 0.825800229 | 0.904760659 | no |
| LOC100506599 | -0.012250045 | -0.22017679  | 0.825872565 | 0.904760659 | no |
| FAM185A      | -0.012248993 | -0.220157875 | 0.825887284 | 0.904760659 | no |
| SNORA21      | -0.012247493 | -0.220130906 | 0.825908269 | 0.904760659 | no |
| HADH         | -0.01224374  | -0.220063451 | 0.825960757 | 0.904772039 | no |
| GET4         | -0.012239762 | -0.219991947 | 0.826016398 | 0.904786871 | no |
| PCDHA8       | -0.012230106 | -0.219818363 | 0.826151475 | 0.904888708 | no |
| OR14C36      | -0.012221884 | -0.219670559 | 0.826266495 | 0.904968568 | no |
| SPRR2E       | -0.012199151 | -0.219261905 | 0.826584525 | 0.905256472 | no |
| USP17L7      | 0.012197072  | 0.21922454   | 0.826613606 | 0.905256472 | no |
| CHST11       | 0.012193851  | 0.219166633  | 0.826658674 | 0.905259698 | no |
| TTLL10       | -0.01218836  | -0.219067923 | 0.8267355   | 0.905297698 | no |
| TRIM43       | 0.012179415  | 0.218907136  | 0.826860644 | 0.905388603 | no |
| SMTN         | -0.012168699 | -0.2187145   | 0.827010583 | 0.905506645 | no |
| IL12RB2      | 0.012163239  | 0.218616344  | 0.827086985 | 0.905521225 | no |
| C9orf131     | -0.01216019  | -0.218561541 | 0.827129643 | 0.905521225 | no |
| ATP6V0CP3    | -0.012158714 | -0.218534998 | 0.827150304 | 0.905521225 | no |
| LINC00305    | 0.012149121  | 0.218362549  | 0.827284541 | 0.905610415 | no |
| OR6C74       | 0.012144552  | 0.218280418  | 0.827348474 | 0.905610415 | no |
| SERPINA12    | 0.012143857  | 0.218267935  | 0.827358191 | 0.905610415 | no |

|              |              |              |             |             |    |
|--------------|--------------|--------------|-------------|-------------|----|
| ZNF426       | -0.012136493 | -0.218135548 | 0.827461249 | 0.905677092 | no |
| GOLGA2P5     | 0.012133089  | 0.21807437   | 0.827508875 | 0.905683093 | no |
| TEK          | 0.012124005  | 0.217911066  | 0.827636005 | 0.905776105 | no |
| PAPD4        | 0.012116609  | 0.217778108  | 0.827739515 | 0.905803411 | no |
| SERPINA4     | -0.012116199 | -0.217770741 | 0.827745251 | 0.905803411 | no |
| BEAN1        | -0.012109787 | -0.217655485 | 0.827834982 | 0.90584295  | no |
| MIR183       | 0.012104342  | 0.217557611  | 0.827911182 | 0.90584295  | no |
| OR1S1        | 0.012103221  | 0.217537455  | 0.827926875 | 0.90584295  | no |
| BANP         | 0.01210157   | 0.217507776  | 0.827949982 | 0.90584295  | no |
| OR11H6       | -0.012095782 | -0.21740373  | 0.82803099  | 0.905885462 | no |
| MME          | 0.012089527  | 0.217291282  | 0.828118543 | 0.905935129 | no |
| CPNE3        | -0.012080011 | -0.217120223 | 0.828251733 | 0.906034714 | no |
| CCDC148      | -0.01207418  | -0.217015407 | 0.828333348 | 0.906077873 | no |
| SLC2A7       | -0.012069747 | -0.216935718 | 0.828395399 | 0.90609963  | no |
| INTS3        | 0.012063798  | 0.216828778  | 0.828478671 | 0.906105948 | no |
| MRPL3        | -0.01206331  | -0.216820009 | 0.8284855   | 0.906105948 | no |
| PTH          | 0.012050809  | 0.216595285  | 0.828660494 | 0.906251218 | no |
| RAB12        | -0.012040436 | -0.216408828 | 0.828805696 | 0.906363893 | no |
| PDP1         | -0.012023492 | -0.216104228 | 0.829042914 | 0.906577178 | no |
| RRAGA        | 0.012019917  | 0.216039976  | 0.829092955 | 0.906585769 | no |
| OR52M1       | -0.012003711 | -0.215748649 | 0.829319854 | 0.906787738 | no |
| RBFA         | -0.012000627 | -0.215693203 | 0.82936304  | 0.906788822 | no |
| TFAM         | 0.011987297  | 0.215453596  | 0.82954967  | 0.906946735 | no |
| OR52L1       | 0.01197623   | 0.215254642  | 0.829704643 | 0.90702599  | no |
| CCNA2        | -0.011975117 | -0.215234645 | 0.829720219 | 0.90702599  | no |
| FAM41C       | -0.011973078 | -0.215197984 | 0.829748777 | 0.90702599  | no |
| FAM160B1     | -0.011952782 | -0.214833143 | 0.830032986 | 0.907290519 | no |
| OR4K17       | -0.011948715 | -0.214760044 | 0.830089933 | 0.90730109  | no |
| OXLD1        | -0.011946062 | -0.214712345 | 0.830127092 | 0.90730109  | no |
| ZBTB20-AS1   | -0.011918768 | -0.214221711 | 0.830509339 | 0.907672711 | no |
| AHCY         | 0.011915281  | 0.214159027  | 0.830558178 | 0.907679929 | no |
| ETS2         | -0.01191225  | -0.214104534 | 0.830600636 | 0.907680172 | no |
| RADIL        | -0.011899853 | -0.213881697 | 0.830774263 | 0.90782375  | no |
| OR5M1        | -0.011877464 | -0.21347922  | 0.83108788  | 0.908077401 | no |
| UBE2S        | -0.011873893 | -0.213415025 | 0.831137904 | 0.908077401 | no |
| LINC00637    | -0.011873855 | -0.213414354 | 0.831138427 | 0.908077401 | no |
| PPP1R2P9     | -0.011871216 | -0.213366906 | 0.831175402 | 0.908077401 | no |
| STK19        | -0.011859868 | -0.213162913 | 0.831334371 | 0.908204909 | no |
| ZNF736       | -0.011855831 | -0.213090346 | 0.831390924 | 0.908220523 | no |
| EIF1AY       | 0.011844741  | 0.212891005  | 0.831546276 | 0.908316604 | no |
| LINC00460    | -0.011843519 | -0.212869024 | 0.831563408 | 0.908316604 | no |
| C1orf94      | 0.011836468  | 0.212742278  | 0.831662188 | 0.908378334 | no |
| RAB19        | -0.011827074 | -0.212573414 | 0.831793799 | 0.908475913 | no |
| NCRNA00185   | 0.011821635  | 0.212475647  | 0.83187     | 0.908512968 | no |
| OR1S2        | -0.011806742 | -0.212207926 | 0.832078673 | 0.908654    | no |
| UGT1A1       | -0.011806383 | -0.212201481 | 0.832083697 | 0.908654    | no |
| PRICKLE2-AS1 | -0.011796972 | -0.212032308 | 0.832215563 | 0.908736124 | no |
| PCNA         | -0.011794981 | -0.211996508 | 0.832243469 | 0.908736124 | no |
| RASGEF1B     | 0.01178905   | 0.211889889  | 0.832326579 | 0.9087807   | no |
| KRTAP10-10   | -0.011753635 | -0.211253276 | 0.832822863 | 0.909244407 | no |
| LOC390705    | -0.011752705 | -0.211236564 | 0.832835892 | 0.909244407 | no |

|              |              |              |             |             |    |
|--------------|--------------|--------------|-------------|-------------|----|
| GCM1         | 0.01174539   | 0.211105076  | 0.832938405 | 0.909310132 | no |
| TMEM14B      | 0.011741245  | 0.211030562  | 0.832996499 | 0.909327361 | no |
| C20orf27     | -0.011735742 | -0.210931644 | 0.833073622 | 0.90936536  | no |
| POLR2D       | -0.011732216 | -0.21086825  | 0.83312305  | 0.909373125 | no |
| LOC100506122 | 0.011727522  | 0.210783868  | 0.833188842 | 0.909398751 | no |
| LOC440354    | 0.011722159  | 0.210687471  | 0.833264003 | 0.909402332 | no |
| SNX1         | -0.011719498 | -0.210639635 | 0.833301302 | 0.909402332 | no |
| ALOX12P2     | 0.011717999  | 0.210612695  | 0.833322307 | 0.909402332 | no |
| INSL5        | -0.011715211 | -0.210562578 | 0.833361385 | 0.909402332 | no |
| USP9Y        | -0.011705315 | -0.210384693 | 0.833500091 | 0.909442239 | no |
| TRAPPC5      | 0.011701923  | 0.210323715  | 0.83354764  | 0.909442239 | no |
| OR8J3        | 0.011700304  | 0.210294604  | 0.83357034  | 0.909442239 | no |
| FOXR2        | -0.011697752 | -0.210248741 | 0.833606103 | 0.909442239 | no |
| PGLYRP2      | -0.011697507 | -0.210244331 | 0.833609542 | 0.909442239 | no |
| RPGR         | 0.011679278  | 0.209916649  | 0.833865073 | 0.909674837 | no |
| FBXL6        | 0.011672964  | 0.209803138  | 0.833953595 | 0.909725227 | no |
| ZP1          | 0.011667581  | 0.209706379  | 0.834029054 | 0.909761364 | no |
| LOC255130    | 0.011641261  | 0.209233255  | 0.834398051 | 0.910117673 | no |
| FLG2         | -0.011627362 | -0.208983414 | 0.83459292  | 0.910277607 | no |
| ZNF264       | -0.011624761 | -0.208936656 | 0.834629391 | 0.910277607 | no |
| LOC402160    | 0.011620785  | 0.208865179  | 0.834685144 | 0.910292217 | no |
| CCDC80       | -0.011611335 | -0.208695317 | 0.834817641 | 0.910390517 | no |
| COG8         | -0.011602907 | -0.208543821 | 0.834935816 | 0.910458051 | no |
| TMEM48       | 0.011599489  | 0.208482367  | 0.834983755 | 0.910458051 | no |
| MRPL41       | -0.011597294 | -0.208442919 | 0.835014527 | 0.910458051 | no |
| MCM9         | 0.011594834  | 0.208398693  | 0.835049027 | 0.910458051 | no |
| HIST1H3J     | 0.011591335  | 0.208335804  | 0.835098086 | 0.910465349 | no |
| CD209        | -0.011572316 | -0.20799391  | 0.835364807 | 0.910709942 | no |
| C11orf94     | 0.011564792  | 0.207858663  | 0.835470323 | 0.910778772 | no |
| TMOD4        | 0.011558875  | 0.207752307  | 0.8355533   | 0.910821179 | no |
| PAGE1        | 0.011555974  | 0.207700159  | 0.835593986 | 0.910821179 | no |
| LINC00482    | 0.011540774  | 0.207426913  | 0.83580718  | 0.91099921  | no |
| C16orf92     | 0.011537585  | 0.207369593  | 0.835851904 | 0.91099921  | no |
| IER3IP1      | 0.011533044  | 0.207287974  | 0.835915588 | 0.91099921  | no |
| UTS2D        | -0.01153224  | -0.207273512 | 0.835926872 | 0.91099921  | no |
| IRS2         | 0.011518843  | 0.207032688  | 0.836114786 | 0.911126618 | no |
| CCDC168      | 0.01151786   | 0.207015019  | 0.836128573 | 0.911126618 | no |
| GABRR1       | 0.01150998   | 0.20687338   | 0.836239098 | 0.911185445 | no |
| TCHHL1       | -0.011507966 | -0.206837169 | 0.836267354 | 0.911185445 | no |
| ZNF107       | -0.011500298 | -0.206699332 | 0.836374916 | 0.911256443 | no |
| LLEP1        | -0.011484953 | -0.206423501 | 0.836590171 | 0.911425437 | no |
| KLK4         | -0.011481671 | -0.206364498 | 0.836636219 | 0.911425437 | no |
| FUZ          | -0.011480172 | -0.206337545 | 0.836657253 | 0.911425437 | no |
| SVIP         | 0.011471669  | 0.206184703  | 0.836776536 | 0.911509176 | no |
| GOLGA6D      | -0.01146694  | -0.206099692 | 0.836842884 | 0.911532167 | no |
| HIST1H2AM    | 0.011464118  | 0.206048969  | 0.836882471 | 0.911532167 | no |
| EMG1         | 0.011458593  | 0.205949663  | 0.836959978 | 0.911567073 | no |
| ZNF224       | 0.011455787  | 0.205899216  | 0.836999351 | 0.911567073 | no |
| TAF7L        | 0.01145162   | 0.205824306  | 0.837057818 | 0.911584553 | no |
| TIE1         | 0.011443713  | 0.205682182  | 0.837168749 | 0.911645179 | no |
| TNP1         | -0.011440005 | -0.205615521 | 0.837220781 | 0.911645179 | no |

|            |              |              |             |             |    |
|------------|--------------|--------------|-------------|-------------|----|
| RPL35      | -0.011436913 | -0.20555994  | 0.837264164 | 0.911645179 | no |
| SNTG2      | 0.011434375  | 0.205514316  | 0.837299776 | 0.911645179 | no |
| MBL1P      | 0.011432335  | 0.205477657  | 0.837328391 | 0.911645179 | no |
| EMC7       | 0.011429512  | 0.205426904  | 0.837368006 | 0.911645179 | no |
| KRTAP2-4   | 0.01141628   | 0.205189049  | 0.837553673 | 0.911758452 | no |
| KIF13B     | 0.011413809  | 0.205144624  | 0.837588352 | 0.911758452 | no |
| LYAR       | -0.011413027 | -0.205130566 | 0.837599326 | 0.911758452 | no |
| GLTP       | -0.01140656  | -0.205014323 | 0.837690069 | 0.911811045 | no |
| ZNF582     | 0.011403298  | 0.204955692  | 0.837735839 | 0.911814683 | no |
| KIAA1919   | 0.011395366  | 0.204813108  | 0.837847148 | 0.911856044 | no |
| SELRC1     | -0.01139377  | -0.204784412 | 0.83786955  | 0.911856044 | no |
| PRSS1      | 0.01139152   | 0.204743962  | 0.837901129 | 0.911856044 | no |
| MGC34796   | 0.011377603  | 0.204493801  | 0.838096429 | 0.911992129 | no |
| GLRX2      | -0.011376561 | -0.204475076 | 0.838111049 | 0.911992129 | no |
| MFSD2B     | 0.011362775  | 0.204227262  | 0.838304528 | 0.912156479 | no |
| TAAR6      | -0.011343508 | -0.203880913 | 0.838574954 | 0.912404533 | no |
| PSG5       | 0.011335065  | 0.203729156  | 0.83869345  | 0.912447981 | no |
| LRRC71     | -0.011334542 | -0.203719747 | 0.838700798 | 0.912447981 | no |
| LOC284998  | 0.011328306  | 0.203607654  | 0.838788326 | 0.912447981 | no |
| LOC285762  | -0.011326065 | -0.203567367 | 0.838819785 | 0.912447981 | no |
| LOC653712  | -0.011325538 | -0.203557906 | 0.838827172 | 0.912447981 | no |
| C18orf63   | 0.011320253  | 0.203462904  | 0.838901357 | 0.912482491 | no |
| KRT39      | 0.011293029  | 0.202973532  | 0.83928352  | 0.91284223  | no |
| ARFRP1     | -0.011286055 | -0.202848163 | 0.83938143  | 0.91284223  | no |
| HUS1B      | -0.01128531  | -0.202834778 | 0.839391883 | 0.91284223  | no |
| LGALS8-AS1 | 0.011282887  | 0.20279122   | 0.839425902 | 0.91284223  | no |
| MELK       | -0.011281565 | -0.202767451 | 0.839444465 | 0.91284223  | no |
| ANP32D     | 0.011277656  | 0.202697188  | 0.839499341 | 0.912846837 | no |
| SNORA70    | -0.011275212 | -0.202653255 | 0.839533653 | 0.912846837 | no |
| GALNTL5    | 0.011266865  | 0.202503215  | 0.839650838 | 0.912914734 | no |
| NBPF4      | -0.011264713 | -0.202464527 | 0.839681055 | 0.912914734 | no |
| FIGF       | -0.011250865 | -0.202215604 | 0.839875479 | 0.913037612 | no |
| FLJ26245   | 0.011250611  | 0.202211039  | 0.839879045 | 0.913037612 | no |
| LOC340508  | -0.011247449 | -0.202154207 | 0.839923436 | 0.913039685 | no |
| SORBS2     | -0.011240992 | -0.202038124 | 0.840014108 | 0.913092064 | no |
| ALS2CR11   | 0.01123759   | 0.201976979  | 0.84006187  | 0.91309248  | no |
| TMEM52     | 0.011234913  | 0.20192885   | 0.840099465 | 0.91309248  | no |
| SLC6A16    | 0.011228032  | 0.201805171  | 0.840196076 | 0.913151303 | no |
| URI1       | -0.011207449 | -0.201435181 | 0.840485104 | 0.913406624 | no |
| GOLGA8G    | -0.011205249 | -0.201395629 | 0.840516002 | 0.913406624 | no |
| RTDR1      | 0.011199579  | 0.201293699  | 0.840595632 | 0.91344697  | no |
| OR10Z1     | -0.011195512 | -0.201220603 | 0.840652737 | 0.913462836 | no |
| RNASE12    | -0.01118457  | -0.201023915 | 0.8408064   | 0.913548633 | no |
| MED4-AS1   | -0.011178341 | -0.200911948 | 0.840893878 | 0.913548633 | no |
| SYNJ2      | -0.01117779  | -0.200902041 | 0.840901619 | 0.913548633 | no |
| MCM3       | 0.011177782  | 0.200901899  | 0.840901729 | 0.913548633 | no |
| SH3PXD2A   | -0.011171128 | -0.200782278 | 0.840995189 | 0.913603984 | no |
| RAET1E     | 0.01114895   | 0.200383626  | 0.841306673 | 0.913854039 | no |
| HA02       | 0.011144952  | 0.200311752  | 0.841362834 | 0.913854039 | no |
| TAL1       | -0.011140535 | -0.200232352 | 0.841424876 | 0.913854039 | no |
| OGFRL1     | 0.011139167  | 0.200207768  | 0.841444086 | 0.913854039 | no |

|            |              |              |             |             |    |
|------------|--------------|--------------|-------------|-------------|----|
| TNNC1      | 0.011138094  | 0.200188485  | 0.841459154 | 0.913854039 | no |
| SLFN14     | 0.01113601   | 0.200151025  | 0.841488425 | 0.913854039 | no |
| FAM21A     | -0.011131999 | -0.200078911 | 0.841544776 | 0.913854039 | no |
| OR2W5      | -0.011130519 | -0.200052323 | 0.841565553 | 0.913854039 | no |
| COG7       | 0.011110253  | 0.199688016  | 0.841850242 | 0.914116994 | no |
| MAST2      | -0.011101758 | -0.19953532  | 0.841969572 | 0.914200378 | no |
| SKA1       | -0.011091076 | -0.199343298 | 0.842119642 | 0.914317128 | no |
| CHMP6      | -0.011077682 | -0.199102548 | 0.842307801 | 0.914475219 | no |
| NCCRP1     | 0.01107238   | 0.199007239  | 0.842382292 | 0.914509893 | no |
| MPDU1      | 0.011056826  | 0.198727642  | 0.842600828 | 0.914662932 | no |
| UBN1       | 0.011056288  | 0.198717978  | 0.842608382 | 0.914662932 | no |
| TMPRSS2    | -0.011042332 | -0.198467102 | 0.84280448  | 0.914811518 | no |
| KRTAP9-4   | 0.011037571  | 0.198381528  | 0.842871372 | 0.914811518 | no |
| AQR        | 0.011037458  | 0.19837949   | 0.842872964 | 0.914811518 | no |
| GLMN       | 0.011033838  | 0.198314418  | 0.842923831 | 0.914820526 | no |
| CNOT1      | -0.011014153 | -0.197960574 | 0.843200439 | 0.915004471 | no |
| KRTAP6-1   | 0.011013933  | 0.197956626  | 0.843203525 | 0.915004471 | no |
| CTDSPL     | -0.01100621  | -0.197817805 | 0.84331205  | 0.915004471 | no |
| MVB12A     | -0.011005514 | -0.197805291 | 0.843321833 | 0.915004471 | no |
| KLHL18     | -0.011004563 | -0.197788192 | 0.843335201 | 0.915004471 | no |
| RPS4Y1     | 0.01100055   | 0.197716058  | 0.843391594 | 0.915004471 | no |
| TARM1      | -0.010998087 | -0.197671786 | 0.843426206 | 0.915004471 | no |
| SPPL2B     | -0.010997216 | -0.197656125 | 0.843438449 | 0.915004471 | no |
| GCFC2      | 0.010994508  | 0.197607448  | 0.843476505 | 0.915004471 | no |
| PRKAG3     | -0.010975271 | -0.19726166  | 0.843746853 | 0.915228518 | no |
| CYP3A43    | -0.010966108 | -0.19709695  | 0.843875635 | 0.915228518 | no |
| LPAR3      | -0.010964826 | -0.197073901 | 0.843893657 | 0.915228518 | no |
| PRICKLE2   | 0.010961424  | 0.197012755  | 0.843941467 | 0.915228518 | no |
| TFAP2B     | 0.010959392  | 0.196976216  | 0.843970037 | 0.915228518 | no |
| HNRNPA1P33 | -0.010958705 | -0.196963874 | 0.843979687 | 0.915228518 | no |
| CRISP1     | -0.010958601 | -0.19696201  | 0.843981144 | 0.915228518 | no |
| 40238      | -0.010953808 | -0.196875845 | 0.844048518 | 0.915255396 | no |
| PGBD1      | -0.010949891 | -0.196805434 | 0.844103574 | 0.915268916 | no |
| ZRANB3     | -0.010928051 | -0.196412858 | 0.844410553 | 0.915555582 | no |
| FAM186B    | -0.010910038 | -0.196089064 | 0.844663764 | 0.915783925 | no |
| FGD4       | 0.010899713  | 0.19590347   | 0.844808909 | 0.915869527 | no |
| HARBI1     | -0.010898359 | -0.195879122 | 0.844827951 | 0.915869527 | no |
| ERF        | 0.010890515  | 0.195738129  | 0.844938219 | 0.915942863 | no |
| CLDN4      | -0.010883703 | -0.195615676 | 0.84503399  | 0.916000478 | no |
| GTPBP10    | 0.010879651  | 0.195542848  | 0.84509095  | 0.916016019 | no |
| NKX6-1     | 0.010874842  | 0.195456398  | 0.845158565 | 0.916020623 | no |
| WDR4       | 0.010871576  | 0.195397691  | 0.845204483 | 0.916020623 | no |
| NTF3       | -0.01086748  | -0.195324061 | 0.845262073 | 0.916020623 | no |
| CCNT1      | -0.01086523  | -0.19528363  | 0.845293696 | 0.916020623 | no |
| PPIL4      | 0.010862413  | 0.195232977  | 0.845333315 | 0.916020623 | no |
| LMOD2      | 0.010861159  | 0.195210446  | 0.845350938 | 0.916020623 | no |
| FAM156B    | 0.010851628  | 0.195039127  | 0.845484942 | 0.91606132  | no |
| ARL6       | 0.010850402  | 0.195017088  | 0.845502181 | 0.91606132  | no |
| KRTAP29-1  | -0.010849393 | -0.194998947 | 0.845516371 | 0.91606132  | no |
| SLC2A12    | -0.010844996 | -0.194919909 | 0.845578195 | 0.916082119 | no |
| MIF4GD     | -0.010835519 | -0.19474956  | 0.845711448 | 0.916180297 | no |

|           |              |              |             |             |    |
|-----------|--------------|--------------|-------------|-------------|----|
| EXOC1     | -0.010822459 | -0.194514794 | 0.845895097 | 0.916236686 | no |
| FGF3      | 0.010821384  | 0.194495465  | 0.845910217 | 0.916236686 | no |
| MAP2K6    | -0.010821243 | -0.194492936 | 0.845912196 | 0.916236686 | no |
| CCND3     | -0.01081969  | -0.19446502  | 0.845934034 | 0.916236686 | no |
| KERA      | 0.010812215  | 0.19433065   | 0.846039152 | 0.91630436  | no |
| ATP5EP2   | -0.010795207 | -0.194024925 | 0.846278331 | 0.916517215 | no |
| XAGE3     | -0.010787666 | -0.193889389 | 0.84638437  | 0.916585865 | no |
| REG1P     | -0.010774153 | -0.193646489 | 0.846574413 | 0.916745476 | no |
| LOC729176 | 0.010754294  | 0.193289504  | 0.846853733 | 0.916942023 | no |
| FRMD1     | -0.010752965 | -0.193265622 | 0.84687242  | 0.916942023 | no |
| KLHDC8A   | 0.010752148  | 0.193250932  | 0.846883915 | 0.916942023 | no |
| UGGT1     | -0.01074878  | -0.19319039  | 0.846931287 | 0.916947118 | no |
| AMTN      | 0.010718798  | 0.192651462  | 0.847353011 | 0.917323725 | no |
| IFNA5     | -0.010717981 | -0.192636774 | 0.847364506 | 0.917323725 | no |
| KIAA0141  | 0.010705997  | 0.19242135   | 0.847533093 | 0.917460016 | no |
| EIF2C1    | 0.0106932    | 0.19219132   | 0.847713118 | 0.917541831 | no |
| C12orf77  | -0.010689152 | -0.192118554 | 0.847770067 | 0.917541831 | no |
| ZNF556    | 0.010686233  | 0.192066094  | 0.847811125 | 0.917541831 | no |
| HCG23     | -0.010684468 | -0.192034367 | 0.847835957 | 0.917541831 | no |
| PRG2      | 0.010680924  | 0.191970656  | 0.847885821 | 0.917541831 | no |
| UCKL1     | 0.010680137  | 0.191956507  | 0.847896894 | 0.917541831 | no |
| SLC4A1AP  | -0.010675521 | -0.191873543 | 0.847961828 | 0.917541831 | no |
| PARM1     | 0.010673536  | 0.191837856  | 0.84798976  | 0.917541831 | no |
| OR1L4     | -0.010673311 | -0.191833819 | 0.84799292  | 0.917541831 | no |
| TMEM232   | 0.010654402  | 0.191493914  | 0.848258968 | 0.917783491 | no |
| CXorf30   | 0.010651306  | 0.191438275  | 0.848302519 | 0.917784405 | no |
| OOEP      | 0.010639473  | 0.191225574  | 0.848469014 | 0.917887332 | no |
| CHCHD5    | 0.010638474  | 0.191207613  | 0.848483073 | 0.917887332 | no |
| DCAF15    | 0.010630863  | 0.191070799  | 0.84859017  | 0.917956981 | no |
| CLC       | -0.010625252 | -0.190969951 | 0.848669115 | 0.917996172 | no |
| UIMC1     | 0.010608046  | 0.19066066   | 0.848911241 | 0.918211861 | no |
| SNORA9    | 0.010592514  | 0.190381464  | 0.849129819 | 0.91840206  | no |
| PSMG3     | -0.01056579  | -0.189901094 | 0.84950592  | 0.918762605 | no |
| BTNL8     | 0.010562231  | 0.189837117  | 0.849556013 | 0.918770545 | no |
| LTBP4     | 0.010551624  | 0.189646459  | 0.849705299 | 0.918885754 | no |
| KNSTRN    | -0.010545892 | -0.189543431 | 0.849785972 | 0.918926755 | no |
| DEFB108B  | -0.010534606 | -0.189340567 | 0.849944824 | 0.919028548 | no |
| TMEM163   | 0.010527926  | 0.18922049   | 0.850038853 | 0.919028548 | no |
| SLC22A1   | -0.010527884 | -0.189219738 | 0.850039442 | 0.919028548 | no |
| TMEM133   | 0.010524319  | 0.189155653  | 0.850089625 | 0.919028548 | no |
| PMS2CL    | -0.010524014 | -0.189150164 | 0.850093923 | 0.919028548 | no |
| GNGT1     | -0.010507014 | -0.188844594 | 0.850333219 | 0.919241006 | no |
| TMUB2     | 0.010497876  | 0.188680336  | 0.850461858 | 0.919333825 | no |
| LOC644838 | -0.010484057 | -0.188431939 | 0.850656397 | 0.919413034 | no |
| CCDC22    | 0.010483906  | 0.188429223  | 0.850658524 | 0.919413034 | no |
| BOLA2     | 0.010483554  | 0.188422899  | 0.850663476 | 0.919413034 | no |
| VWA3A     | 0.010474394  | 0.188258236  | 0.850792442 | 0.919506179 | no |
| PTPRVP    | 0.010468378  | 0.1881501    | 0.850877138 | 0.919537873 | no |
| ARTN      | -0.010466233 | -0.188111537 | 0.850907341 | 0.919537873 | no |
| SPTLC1    | -0.010454307 | -0.187897167 | 0.851075248 | 0.919673077 | no |
| CALCO2    | 0.010449838  | 0.187816837  | 0.851138169 | 0.919694826 | no |

|              |              |              |             |             |    |
|--------------|--------------|--------------|-------------|-------------|----|
| CDK18        | 0.010443661  | 0.187705813  | 0.851225134 | 0.919742551 | no |
| PCYT1B       | -0.010427998 | -0.187424263 | 0.851445678 | 0.919934597 | no |
| DCAF8L1      | -0.010421011 | -0.187298676 | 0.851544058 | 0.919994638 | no |
| LOC646278    | 0.0104165    | 0.187217588  | 0.85160758  | 0.920017016 | no |
| FUBP1        | 0.010408585  | 0.187075314  | 0.851719035 | 0.920030215 | no |
| MIR454       | -0.010405872 | -0.187026552 | 0.851757235 | 0.920030215 | no |
| EMILIN3      | 0.010404852  | 0.187008219  | 0.851771598 | 0.920030215 | no |
| UPF1         | -0.010403472 | -0.186983404 | 0.851791037 | 0.920030215 | no |
| SLC22A15     | 0.010394336  | 0.186819178  | 0.851919696 | 0.920083604 | no |
| MRPL55       | -0.010393881 | -0.186811014 | 0.851926092 | 0.920083604 | no |
| C8orf59      | -0.010385647 | -0.186663003 | 0.85204205  | 0.920126257 | no |
| LOC100129345 | -0.010384996 | -0.186651307 | 0.852051214 | 0.920126257 | no |
| SNORA84      | -0.010378565 | -0.186535692 | 0.852141794 | 0.920171748 | no |
| RPUSD1       | 0.010375925  | 0.186488239  | 0.852178972 | 0.920171748 | no |
| RAB3GAP2     | 0.010367718  | 0.186340732  | 0.852294544 | 0.920179818 | no |
| GKN2         | -0.01036493  | -0.186290607 | 0.852333816 | 0.920179818 | no |
| MFAP3L       | 0.010363173  | 0.186259029  | 0.852358559 | 0.920179818 | no |
| A2ML1        | -0.010362574 | -0.186248257 | 0.852366999 | 0.920179818 | no |
| LOC339568    | -0.010359587 | -0.18619457  | 0.852409063 | 0.920179818 | no |
| APH1A        | -0.010357153 | -0.186150813 | 0.852443348 | 0.920179818 | no |
| LOC100505964 | 0.010343691  | 0.18590884   | 0.852632946 | 0.920338254 | no |
| FASTKD3      | -0.010338947 | -0.185823555 | 0.852699773 | 0.920356682 | no |
| RTP3         | -0.010336398 | -0.185777746 | 0.852735668 | 0.920356682 | no |
| POLQ         | -0.010308208 | -0.185271019 | 0.853132751 | 0.920718593 | no |
| TEPP         | -0.010306509 | -0.185240493 | 0.853156673 | 0.920718593 | no |
| SLC27A2      | 0.010299922  | 0.18512208   | 0.85324947  | 0.920756223 | no |
| RBMS3        | 0.010297707  | 0.185082266  | 0.853280672 | 0.920756223 | no |
| OR52E8       | 0.010294561  | 0.185025717  | 0.853324989 | 0.920756223 | no |
| XPC          | 0.010291868  | 0.18497732   | 0.853362917 | 0.920756223 | no |
| ZP4          | 0.010288361  | 0.184914271  | 0.853412329 | 0.92076331  | no |
| SHOX2        | 0.010283341  | 0.184824044  | 0.853483041 | 0.920793376 | no |
| FAM24A       | -0.010273376 | -0.184644925 | 0.853623424 | 0.920859987 | no |
| C6orf89      | -0.010272875 | -0.184635922 | 0.85363048  | 0.920859987 | no |
| ABCA8        | 0.010266367  | 0.184518932  | 0.853722173 | 0.920912674 | no |
| OR10H4       | -0.010260323 | -0.184410297 | 0.853807318 | 0.920925934 | no |
| PFKFB2       | -0.010259411 | -0.184393902 | 0.853820168 | 0.920925934 | no |
| ACRC         | -0.010248881 | -0.184204614 | 0.853968533 | 0.921009697 | no |
| PSMA8        | -0.01024638  | -0.184159672 | 0.854003759 | 0.921009697 | no |
| CERS1        | 0.010244774  | 0.184130794  | 0.854026394 | 0.921009697 | no |
| DYNAP        | -0.010239912 | -0.1840434   | 0.854094896 | 0.921014616 | no |
| VIL1         | 0.010238367  | 0.184015625  | 0.854116667 | 0.921014616 | no |
| TRIM45       | 0.01021963   | 0.183678837  | 0.854380664 | 0.921226694 | no |
| MIR508       | 0.010218324  | 0.183655354  | 0.854399072 | 0.921226694 | no |
| TRIM65       | 0.010213455  | 0.183567834  | 0.854467679 | 0.921230931 | no |
| LRCH3        | 0.010211961  | 0.183540976  | 0.854488734 | 0.921230931 | no |
| OR6T1        | -0.010204086 | -0.18339943  | 0.854599694 | 0.921265698 | no |
| ACTL7A       | -0.010203588 | -0.183390471 | 0.854606717 | 0.921265698 | no |
| ALPI         | 0.010195858  | 0.183251535  | 0.854715635 | 0.921268093 | no |
| SERPINB13    | 0.010194726  | 0.183231186  | 0.854731588 | 0.921268093 | no |
| PRPH         | 0.010194304  | 0.183223592  | 0.854737541 | 0.921268093 | no |
| C9orf169     | 0.010190347  | 0.183152471  | 0.854793297 | 0.92128119  | no |



|              |              |              |             |             |    |
|--------------|--------------|--------------|-------------|-------------|----|
| POFUT2       | 0.010187357  | 0.183098729  | 0.854835429 | 0.92128119  | no |
| DEFB128      | 0.010172006  | 0.1828228    | 0.855051756 | 0.921438735 | no |
| OR5AN1       | 0.010169217  | 0.182772659  | 0.855091067 | 0.921438735 | no |
| C2orf70      | -0.010164925 | -0.182695519 | 0.855151547 | 0.921438735 | no |
| ARHGEF39     | -0.010164814 | -0.182693521 | 0.855153114 | 0.921438735 | no |
| ENPP4        | 0.01015338   | 0.182487985  | 0.855314264 | 0.921566171 | no |
| TRIM74       | -0.010147985 | -0.182391019 | 0.855390292 | 0.921601883 | no |
| PAICS        | 0.010138248  | 0.182215997  | 0.855527525 | 0.921693531 | no |
| CAPN14       | -0.010133359 | -0.182128113 | 0.855596436 | 0.921693531 | no |
| SPATA3       | -0.010129549 | -0.182059633 | 0.855650132 | 0.921693531 | no |
| OR5M11       | 0.010127753  | 0.182027338  | 0.855675455 | 0.921693531 | no |
| HIST1H2AK    | -0.010126735 | -0.182009054 | 0.855689792 | 0.921693531 | no |
| WFDC2        | -0.010118617 | -0.181863132 | 0.855804215 | 0.921748591 | no |
| C9           | -0.010117023 | -0.181834472 | 0.85582669  | 0.921748591 | no |
| KRTAP6-2     | -0.010110029 | -0.181708754 | 0.855925273 | 0.921808572 | no |
| TMEM164      | 0.01009085   | 0.181364023  | 0.85619561  | 0.92203015  | no |
| ADRA1D       | -0.010089346 | -0.181336976 | 0.856216821 | 0.92203015  | no |
| TMEM236      | 0.010084975  | 0.181258411  | 0.856278435 | 0.922050298 | no |
| OR2A4        | -0.010079208 | -0.181154757 | 0.856359725 | 0.92209163  | no |
| ZNF335       | 0.010028822  | 0.180249062  | 0.857070077 | 0.922729676 | no |
| UPK1A-AS1    | 0.010025662  | 0.180192266  | 0.857114627 | 0.922729676 | no |
| C3orf65      | 0.010025348  | 0.180186614  | 0.85711906  | 0.922729676 | no |
| LRRC3        | -0.010017491 | -0.180045385 | 0.857229841 | 0.922729676 | no |
| LOC340073    | -0.010014759 | -0.179996288 | 0.857268353 | 0.922729676 | no |
| BGLAP        | 0.010011103  | 0.179930569  | 0.857319904 | 0.922729676 | no |
| TRIM10       | -0.010010549 | -0.179920611 | 0.857327716 | 0.922729676 | no |
| APOA2        | 0.010008796  | 0.179889105  | 0.85735243  | 0.922729676 | no |
| CAMKMT       | 0.010008323  | 0.179880595  | 0.857359106 | 0.922729676 | no |
| PRSS30P      | -0.010003907 | -0.179801219 | 0.857421371 | 0.922729676 | no |
| NHLRC2       | -0.010003679 | -0.17979713  | 0.857424579 | 0.922729676 | no |
| LOC646329    | -0.009987008 | -0.179497467 | 0.857659654 | 0.922926918 | no |
| KLHL33       | 0.009976082  | 0.179301065  | 0.857813732 | 0.922926918 | no |
| KRTAP5-3     | -0.009975172 | -0.179284713 | 0.857826561 | 0.922926918 | no |
| MIOX         | -0.009974028 | -0.179264144 | 0.857842697 | 0.922926918 | no |
| TRIM64       | -0.009973299 | -0.179251045 | 0.857852974 | 0.922926918 | no |
| RNF138       | -0.009970243 | -0.179196111 | 0.857896071 | 0.922926918 | no |
| LINC00675    | -0.009969363 | -0.1791803   | 0.857908475 | 0.922926918 | no |
| PKN1         | -0.009960746 | -0.179025417 | 0.858029988 | 0.923001091 | no |
| MKI67        | -0.009958383 | -0.178982932 | 0.85806332  | 0.923001091 | no |
| SLC5A4       | 0.009942062  | 0.178689563  | 0.858293492 | 0.923202474 | no |
| GATC         | 0.009931069  | 0.178491961  | 0.858448533 | 0.923320821 | no |
| LOC100233156 | -0.009927949 | -0.178435885 | 0.858492532 | 0.923320821 | no |
| IPCEF1       | -0.009925122 | -0.178385065 | 0.858532408 | 0.923320821 | no |
| FUT10        | -0.009920533 | -0.178302591 | 0.858597121 | 0.923344211 | no |
| SPIC         | -0.009909871 | -0.178110943 | 0.858747502 | 0.923459723 | no |
| COA1         | 0.009896503  | 0.177870641  | 0.858936066 | 0.923580439 | no |
| PTCH2        | 0.009895819  | 0.177858352  | 0.85894571  | 0.923580439 | no |
| PADI1        | -0.009889681 | -0.177748033 | 0.85903228  | 0.923623522 | no |
| PNLDC1       | -0.009882589 | -0.177620541 | 0.859132328 | 0.923623522 | no |
| ENDOV        | -0.009881305 | -0.177597472 | 0.859150432 | 0.923623522 | no |
| PHGR1        | -0.009880791 | -0.177588228 | 0.859157686 | 0.923623522 | no |

|           |              |              |             |             |    |
|-----------|--------------|--------------|-------------|-------------|----|
| SULT1C2P1 | -0.009871214 | -0.17741608  | 0.859292782 | 0.923722548 | no |
| UPK3B     | 0.009866654  | 0.177334113  | 0.859357109 | 0.923745492 | no |
| PRNT      | 0.009861022  | 0.177232885  | 0.859436552 | 0.923784682 | no |
| NCAPD2    | 0.009856598  | 0.177153356  | 0.859498968 | 0.923805567 | no |
| MAGOH2    | -0.009849847 | -0.177032013 | 0.859594201 | 0.9238161   | no |
| OR10A4    | -0.009849809 | -0.177031326 | 0.85959474  | 0.9238161   | no |
| C2orf78   | -0.009830047 | -0.176676121 | 0.859873526 | 0.924032425 | no |
| WDR52-AS1 | 0.0098291    | 0.176659101  | 0.859886884 | 0.924032425 | no |
| OR2B2     | -0.009824336 | -0.176573465 | 0.859954099 | 0.924032425 | no |
| ATG9B     | 0.00982335   | 0.17655574   | 0.859968012 | 0.924032425 | no |
| NAT14     | -0.009813155 | -0.176372489 | 0.860111848 | 0.924140772 | no |
| PHLDB2    | 0.009809588  | 0.176308363  | 0.860162182 | 0.924148651 | no |
| INTU      | 0.009802835  | 0.176186987  | 0.860257456 | 0.92418773  | no |
| NXPE3     | -0.009797955 | -0.176099265 | 0.860326314 | 0.92418773  | no |
| GJA1      | -0.009797769 | -0.176095921 | 0.860328938 | 0.92418773  | no |
| GORAB     | -0.009792234 | -0.175996428 | 0.860407037 | 0.92418773  | no |
| TCAM1P    | -0.009791771 | -0.175988102 | 0.860413573 | 0.92418773  | no |
| KLK13     | 0.009757089  | 0.175364706  | 0.860902953 | 0.924667168 | no |
| CDPF1     | 0.009737752  | 0.175017124  | 0.861175836 | 0.924754746 | no |
| OR2AG1    | -0.009736345 | -0.174991835 | 0.861195691 | 0.924754746 | no |
| DPH3P1    | -0.009735095 | -0.17496937  | 0.861213328 | 0.924754746 | no |
| CCDC59    | -0.009735047 | -0.174968518 | 0.861213997 | 0.924754746 | no |
| FAM133CP  | 0.009734702  | 0.174962312  | 0.861218869 | 0.924754746 | no |
| PRSS45    | 0.009733016  | 0.174931996  | 0.861242671 | 0.924754746 | no |
| MAG       | 0.009720054  | 0.174699021  | 0.861425589 | 0.924904943 | no |
| TTY10     | -0.009705325 | -0.174434266 | 0.861633468 | 0.925036474 | no |
| OR1A2     | -0.009705275 | -0.174433361 | 0.861634179 | 0.925036474 | no |
| GRPEL2    | -0.009701884 | -0.17437242  | 0.86168203  | 0.925041636 | no |
| FM02      | 0.009692384  | 0.174201649  | 0.861816122 | 0.925139374 | no |
| CCDC108   | 0.009687623  | 0.174116068  | 0.861883322 | 0.925140968 | no |
| MST01     | 0.009686179  | 0.174090115  | 0.861903702 | 0.925140968 | no |
| TUBB4B    | -0.009674833 | -0.173886186 | 0.862063838 | 0.92526664  | no |
| WFDC10B   | -0.009664507 | -0.173700564 | 0.862209604 | 0.925338277 | no |
| CDH26     | -0.009662748 | -0.17366895  | 0.862234429 | 0.925338277 | no |
| BTNL2     | -0.009660954 | -0.173636704 | 0.862259752 | 0.925338277 | no |
| SMYD2     | 0.009651123  | 0.173459992  | 0.862398527 | 0.925440992 | no |
| LOC392232 | -0.00961533  | -0.172816626 | 0.862903807 | 0.925936974 | no |
| MIR181A1  | 0.009605414  | 0.172638388  | 0.863043801 | 0.926040957 | no |
| ITM2A     | -0.009599298 | -0.172528451 | 0.86313015  | 0.926087372 | no |
| ME3       | -0.009591927 | -0.172395961 | 0.863234216 | 0.92615279  | no |
| OR8H2     | 0.009565739  | 0.171925244  | 0.863603966 | 0.926435237 | no |
| KLHL12    | -0.009562609 | -0.171868989 | 0.863648157 | 0.926435237 | no |
| MLLT10P1  | 0.009562285  | 0.171863165  | 0.863652732 | 0.926435237 | no |
| PLAC4     | 0.009559715  | 0.171816972  | 0.863689018 | 0.926435237 | no |
| GPHB5     | -0.009558016 | -0.171786425 | 0.863713015 | 0.926435237 | no |
| LOC440704 | -0.009551786 | -0.171674455 | 0.863800974 | 0.926473043 | no |
| ALDH1A2   | -0.009549413 | -0.171631802 | 0.863834481 | 0.926473043 | no |
| OR5AC2    | 0.009540258  | 0.171467243  | 0.863963756 | 0.926565451 | no |
| KRT28     | -0.009536307 | -0.171396226 | 0.864019547 | 0.926579047 | no |
| VPS8      | 0.009525456  | 0.171201176  | 0.864172782 | 0.926697134 | no |
| RCVRN     | -0.009513478 | -0.170985872 | 0.864341936 | 0.926751343 | no |

|              |              |              |             |             |    |
|--------------|--------------|--------------|-------------|-------------|----|
| C2orf53      | -0.009513064 | -0.170978426 | 0.864347786 | 0.926751343 | no |
| ERVFRD-1     | -0.009512715 | -0.170972168 | 0.864352702 | 0.926751343 | no |
| LOC100129361 | -0.009501681 | -0.170773831 | 0.864508531 | 0.92687218  | no |
| GRB14        | 0.009493186  | 0.170621135  | 0.864628505 | 0.926954565 | no |
| STL          | -0.009487521 | -0.170519301 | 0.864708517 | 0.926994101 | no |
| GPR110       | -0.009460334 | -0.170030629 | 0.865092496 | 0.927294555 | no |
| OXSR1        | 0.009457882  | 0.169986554  | 0.86512713  | 0.927294555 | no |
| RMI2         | -0.009457587 | -0.169981257 | 0.865131292 | 0.927294555 | no |
| OR51D1       | 0.009455457  | 0.169942973  | 0.865161375 | 0.927294555 | no |
| ADAM7        | 0.00944516   | 0.169757888  | 0.865306818 | 0.927362943 | no |
| LRRN3        | -0.00944483  | -0.169751951 | 0.865311483 | 0.927362943 | no |
| TUBB8        | -0.009432825 | -0.169536161 | 0.86548106  | 0.927498427 | no |
| LMAN2L       | -0.009419987 | -0.169305402 | 0.865662407 | 0.927646512 | no |
| SYNE4        | 0.009416364  | 0.169240284  | 0.865713583 | 0.927655097 | no |
| TTLL6        | 0.009402874  | 0.168997813  | 0.865904144 | 0.927789575 | no |
| XGPY2        | 0.009399152  | 0.168930917  | 0.86595672  | 0.927789575 | no |
| PIWIL3       | 0.009397782  | 0.168906276  | 0.865976086 | 0.927789575 | no |
| MIR124-2     | -0.00939285  | -0.168817627 | 0.86604576  | 0.927789575 | no |
| TPI1P3       | -0.0093922   | -0.16880595  | 0.866054938 | 0.927789575 | no |
| TPSG1        | -0.009383791 | -0.168654804 | 0.866173733 | 0.927870586 | no |
| PLK2         | 0.009370952  | 0.168424021  | 0.866355126 | 0.927920059 | no |
| EFCAB6-AS1   | -0.009370129 | -0.168409229 | 0.866366752 | 0.927920059 | no |
| KRTAP3-3     | -0.009369965 | -0.168406285 | 0.866369066 | 0.927920059 | no |
| TBC1D3P2     | 0.009366295  | 0.168340317  | 0.866420918 | 0.927920059 | no |
| RGSL1        | -0.009365241 | -0.168321381 | 0.866435802 | 0.927920059 | no |
| USP17L2      | -0.009359999 | -0.168227146 | 0.866509873 | 0.927953144 | no |
| MAP1LC3B     | -0.009344317 | -0.167945277 | 0.866731437 | 0.928144168 | no |
| OR1I1        | -0.009340814 | -0.16788231  | 0.866780933 | 0.928150924 | no |
| TSKU         | 0.009335382  | 0.167784677  | 0.86685768  | 0.928186857 | no |
| UCP3         | -0.009323899 | -0.167578277 | 0.867019933 | 0.928310393 | no |
| RNASE11      | -0.009321103 | -0.167528016 | 0.867059444 | 0.928310393 | no |
| MTOR-AS1     | -0.009305935 | -0.16725537  | 0.867273782 | 0.928493616 | no |
| OR13F1       | 0.009299476  | 0.167139279  | 0.867365049 | 0.92854507  | no |
| EXO5         | -0.009286957 | -0.166914253 | 0.867541962 | 0.9286882   | no |
| EDDM3B       | 0.009279543  | 0.166780991  | 0.867646735 | 0.928724093 | no |
| C12orf50     | -0.009278468 | -0.166761676 | 0.86766192  | 0.928724093 | no |
| OR4C3        | 0.009268251  | 0.166578015  | 0.867806322 | 0.928832395 | no |
| LOC100130894 | -0.009261197 | -0.166451232 | 0.867906005 | 0.928892827 | no |
| WWC2         | 0.009257113  | 0.166377823  | 0.867963725 | 0.928908342 | no |
| SNX4         | 0.009245902  | 0.166176308  | 0.868122174 | 0.928997246 | no |
| METTL6       | -0.009242924 | -0.16612278  | 0.868164263 | 0.928997246 | no |
| OR2AG2       | -0.00924206  | -0.166107246 | 0.868176478 | 0.928997246 | no |
| KCNC3        | 0.009238826  | 0.166049114  | 0.868222187 | 0.928999902 | no |
| TRAPPC8      | -0.009222145 | -0.165749297 | 0.868457946 | 0.929180445 | no |
| C9orf40      | -0.009216466 | -0.165647221 | 0.868538214 | 0.929180445 | no |
| TRH          | 0.009206482  | 0.16546775   | 0.868679347 | 0.929180445 | no |
| POLR2A       | 0.009199383  | 0.165340152  | 0.868779691 | 0.929180445 | no |
| SGK1         | -0.009197383 | -0.165304207 | 0.868807958 | 0.929180445 | no |
| GSTA1        | 0.009191465  | 0.165197824  | 0.86889162  | 0.929180445 | no |
| KANSL3       | 0.009187854  | 0.165132919  | 0.868942663 | 0.929180445 | no |
| EFTUD2       | 0.009186638  | 0.165111075  | 0.868959842 | 0.929180445 | no |

|              |              |              |             |             |    |
|--------------|--------------|--------------|-------------|-------------|----|
| RBM15B       | -0.009185286 | -0.165086777 | 0.868978951 | 0.929180445 | no |
| MYLK2        | -0.009185051 | -0.165082538 | 0.868982285 | 0.929180445 | no |
| NCOR1P1      | 0.009183272  | 0.165050574  | 0.869007423 | 0.929180445 | no |
| GPRC5D       | 0.009182431  | 0.165035451  | 0.869019317 | 0.929180445 | no |
| ADIPOQ-AS1   | 0.009181278  | 0.165014719  | 0.869035621 | 0.929180445 | no |
| RNF170       | -0.00917894  | -0.164972698 | 0.869068669 | 0.929180445 | no |
| TSSC4        | -0.009178783 | -0.164969885 | 0.869070881 | 0.929180445 | no |
| OR9G4        | -0.009177948 | -0.164954868 | 0.869082691 | 0.929180445 | no |
| ECEL1P2      | -0.009171868 | -0.164845589 | 0.869168636 | 0.929226104 | no |
| ERVMER34-1   | -0.009168067 | -0.164777267 | 0.86922237  | 0.929237325 | no |
| MCC          | -0.009159145 | -0.164616898 | 0.869348499 | 0.929258545 | no |
| CDKN2C       | 0.009159002  | 0.164614326  | 0.869350523 | 0.929258545 | no |
| HIST1H2BF    | 0.009153432  | 0.164514203  | 0.86942927  | 0.929258545 | no |
| OR6C68       | -0.009151941 | -0.16448741  | 0.869450343 | 0.929258545 | no |
| LOC730159    | -0.00915063  | -0.164463851 | 0.869468873 | 0.929258545 | no |
| ZNF847P      | -0.009144806 | -0.164359169 | 0.869551209 | 0.929258545 | no |
| IL21R-AS1    | -0.009144493 | -0.164353545 | 0.869555632 | 0.929258545 | no |
| PIGV         | -0.009141299 | -0.164296119 | 0.8696008   | 0.929258545 | no |
| NPIP         | -0.009139136 | -0.164257248 | 0.869631374 | 0.929258545 | no |
| KRTAP5-10    | 0.009134803  | 0.164179371  | 0.869692629 | 0.929277795 | no |
| KIF1C        | 0.00913141   | 0.164118374  | 0.869740607 | 0.929282857 | no |
| RAB30        | -0.009127683 | -0.164051379 | 0.869793304 | 0.92929296  | no |
| MROH2B       | 0.009122717  | 0.163962119  | 0.869863514 | 0.929298544 | no |
| SPATS1       | -0.009120709 | -0.163926037 | 0.869891896 | 0.929298544 | no |
| P2RY14       | -0.009118138 | -0.163879815 | 0.869928254 | 0.929298544 | no |
| FLJ16171     | -0.009111246 | -0.163755933 | 0.870025701 | 0.929356446 | no |
| OR8U1        | -0.009107431 | -0.163687369 | 0.870079635 | 0.929367864 | no |
| ZNF266       | 0.009102028  | 0.163590255  | 0.870156028 | 0.92940327  | no |
| IL5          | 0.009096175  | 0.163485039  | 0.870238795 | 0.92944548  | no |
| RPS4Y2       | 0.009090619  | 0.163385175  | 0.870317354 | 0.929483191 | no |
| PELI1        | 0.009079474  | 0.163184851  | 0.870474945 | 0.929544755 | no |
| SNORA27      | -0.009076096 | -0.163124143 | 0.870522703 | 0.929544755 | no |
| LINC00353    | 0.009074876  | 0.163102218  | 0.870539951 | 0.929544755 | no |
| TMEM192      | 0.009074307  | 0.163091975  | 0.87054801  | 0.929544755 | no |
| LOC340357    | 0.009056777  | 0.162776883  | 0.8707959   | 0.929705554 | no |
| FTSJ1        | 0.009053287  | 0.162714166  | 0.870845242 | 0.929705554 | no |
| LOC100630923 | 0.009051435  | 0.162680878  | 0.870871431 | 0.929705554 | no |
| HIST1H2BM    | 0.00905142   | 0.162680608  | 0.870871644 | 0.929705554 | no |
| RHAG         | 0.009042777  | 0.162525251  | 0.870993873 | 0.929776521 | no |
| TAMM41       | 0.009040601  | 0.162486136  | 0.871024648 | 0.929776521 | no |
| SPTY2D1-AS1  | 0.009036565  | 0.162413599  | 0.871081719 | 0.929791259 | no |
| CCDC173      | -0.009032966 | -0.162348895 | 0.871132628 | 0.929799419 | no |
| LOC100144604 | 0.009028875  | 0.162275369  | 0.871190478 | 0.929814986 | no |
| NPR3         | -0.009009479 | -0.161926742 | 0.871464788 | 0.930061566 | no |
| NDUFB5       | -0.009000054 | -0.161757327 | 0.871598094 | 0.930157644 | no |
| CDYL2        | -0.008994433 | -0.1616563   | 0.87167759  | 0.930196291 | no |
| PHF19        | -0.008986829 | -0.161519624 | 0.87178514  | 0.930264869 | no |
| CACNB3       | -0.008981292 | -0.161420096 | 0.871863459 | 0.93030225  | no |
| MIR3976      | -0.008960704 | -0.161050042 | 0.87215467  | 0.930563176 | no |
| OR4X2        | -0.008957882 | -0.160999309 | 0.872194595 | 0.930563176 | no |
| OR5K3        | -0.008942727 | -0.160726913 | 0.872408967 | 0.930745687 | no |

|              |              |              |             |             |    |
|--------------|--------------|--------------|-------------|-------------|----|
| PPP1CC       | -0.008939318 | -0.160665631 | 0.872457197 | 0.930750937 | no |
| FOXF2        | 0.008916764  | 0.160260251  | 0.872776246 | 0.931010699 | no |
| DAG1         | -0.008915981 | -0.160246166 | 0.872787332 | 0.931010699 | no |
| C14orf64     | -0.00891097  | -0.160156096 | 0.872858224 | 0.931040107 | no |
| PKDCC        | 0.008899     | 0.159940945  | 0.873027567 | 0.931174522 | no |
| ACTBL2       | 0.008891922  | 0.159813724  | 0.873127704 | 0.931235111 | no |
| VPS4B        | -0.008878742 | -0.159576827 | 0.873314174 | 0.931342995 | no |
| EPPK1        | 0.008876918  | 0.159544032  | 0.873339989 | 0.931342995 | no |
| EMC4         | -0.008875583 | -0.159520051 | 0.873358865 | 0.931342995 | no |
| LOC388796    | -0.008849997 | -0.159060145 | 0.873720897 | 0.93161368  | no |
| BAIAP2L1     | 0.008849689  | 0.159054607  | 0.873725256 | 0.93161368  | no |
| GALNT11      | -0.008848453 | -0.159032391 | 0.873742745 | 0.93161368  | no |
| IL37         | 0.008836246  | 0.158812989  | 0.873915465 | 0.931652964 | no |
| CDC42EP2     | 0.008833515  | 0.158763908  | 0.873954104 | 0.931652964 | no |
| CRLS1        | 0.00883285   | 0.158751949  | 0.873963519 | 0.931652964 | no |
| PCSK6        | 0.008832605  | 0.158747545  | 0.873966987 | 0.931652964 | no |
| USP24        | 0.008828716  | 0.158677636  | 0.874022023 | 0.931652964 | no |
| DALRD3       | 0.008827467  | 0.15865519   | 0.874039694 | 0.931652964 | no |
| SCGB1C1      | 0.008818019  | 0.158485367  | 0.874173392 | 0.931664303 | no |
| OXNAD1       | 0.008815832  | 0.158446058  | 0.874204339 | 0.931664303 | no |
| CSNK2A3      | -0.008815239 | -0.158435402 | 0.874212728 | 0.931664303 | no |
| ZNF598       | 0.008814461  | 0.158421419  | 0.874223737 | 0.931664303 | no |
| MAD2L2       | -0.008808128 | -0.15830758  | 0.874313363 | 0.931668725 | no |
| LOC100507334 | 0.008807403  | 0.158294553  | 0.874323619 | 0.931668725 | no |
| LDHAL6B      | 0.008799795  | 0.158157804  | 0.874431284 | 0.931668725 | no |
| LOC100498859 | 0.008799057  | 0.158144547  | 0.874441721 | 0.931668725 | no |
| KRTAP13-1    | -0.008796773 | -0.158103486 | 0.87447405  | 0.931668725 | no |
| SLC22A24     | -0.008795787 | -0.158085773 | 0.874487996 | 0.931668725 | no |
| SLC28A3      | 0.008787646  | 0.15793943   | 0.874603219 | 0.931745292 | no |
| EHD3         | 0.008764488  | 0.157523185  | 0.874930962 | 0.932048246 | no |
| LINC00052    | 0.008747186  | 0.157212195  | 0.875175844 | 0.932185422 | no |
| CPO          | -0.008746394 | -0.157197965 | 0.875187049 | 0.932185422 | no |
| MGC16142     | -0.008743074 | -0.157138282 | 0.875234047 | 0.932185422 | no |
| NPS          | 0.008740637  | 0.157094476  | 0.875268542 | 0.932185422 | no |
| DPT          | -0.008740067 | -0.157084231 | 0.87527661  | 0.932185422 | no |
| PNLIP        | -0.008733864 | -0.156972745 | 0.875364402 | 0.932229372 | no |
| CACNA1C      | 0.008729025  | 0.156885771  | 0.875432892 | 0.932229372 | no |
| LOC642929    | -0.008727957 | -0.156866573 | 0.87544801  | 0.932229372 | no |
| MPHOSPH9     | -0.0087245   | -0.156804439 | 0.87549694  | 0.932235284 | no |
| IL34         | -0.00871381  | -0.156612283 | 0.875648264 | 0.93235022  | no |
| MFAP2        | 0.008707935  | 0.156506686  | 0.875731425 | 0.932392572 | no |
| HOXA2        | 0.008699403  | 0.15635333   | 0.875852199 | 0.932448168 | no |
| SCYL3        | 0.008698116  | 0.156330196  | 0.875870418 | 0.932448168 | no |
| SCARNA27     | 0.00868963   | 0.156177678  | 0.875990536 | 0.93252985  | no |
| RORC         | -0.008683155 | -0.156061283 | 0.876082207 | 0.932581242 | no |
| MT1F         | 0.008676806  | 0.15594717   | 0.876172082 | 0.932630719 | no |
| SLC35A1      | -0.008672985 | -0.155878495 | 0.876226171 | 0.932642099 | no |
| AVPR1A       | 0.00866378   | 0.155713032  | 0.876356492 | 0.932734617 | no |
| LOC100506795 | 0.008637254  | 0.155236262  | 0.876732025 | 0.933088098 | no |
| NBPF1        | 0.008631798  | 0.155138191  | 0.876809275 | 0.933124103 | no |
| SP7          | 0.008626796  | 0.155048278  | 0.8768801   | 0.933153268 | no |

|              |              |              |             |             |    |
|--------------|--------------|--------------|-------------|-------------|----|
| C11orf31     | -0.008622118 | -0.154964193 | 0.876946335 | 0.933177545 | no |
| CDRT15P2     | -0.008618126 | -0.154892445 | 0.877002854 | 0.93319148  | no |
| CLLU1        | -0.008606855 | -0.154689851 | 0.877162446 | 0.933297976 | no |
| CHST3        | 0.008601794  | 0.154598889  | 0.877234102 | 0.933297976 | no |
| TGFBRAP1     | -0.008599144 | -0.154551256 | 0.877271626 | 0.933297976 | no |
| NIPAL3       | -0.008596356 | -0.154501142 | 0.877311105 | 0.933297976 | no |
| MKLN1        | -0.008590642 | -0.154398444 | 0.877392009 | 0.933297976 | no |
| UQCC         | 0.008590225  | 0.154390938  | 0.877397922 | 0.933297976 | no |
| KRT78        | -0.008586271 | -0.154319874 | 0.877453906 | 0.933297976 | no |
| DEFB127      | -0.008584708 | -0.154291782 | 0.877476036 | 0.933297976 | no |
| FAM35A       | -0.008580643 | -0.154218714 | 0.877533601 | 0.933297976 | no |
| UBE4A        | -0.008580388 | -0.154214131 | 0.877537211 | 0.933297976 | no |
| LRRC2-AS1    | -0.008575617 | -0.154128371 | 0.877604774 | 0.933323644 | no |
| OR6C3        | 0.008570772  | 0.154041295  | 0.877673375 | 0.933350413 | no |
| HOXD12       | -0.008539723 | -0.153483218 | 0.878113067 | 0.933758182 | no |
| TMEM134      | -0.008537559 | -0.153444319 | 0.878143716 | 0.933758182 | no |
| PRAMEF5      | 0.008531664  | 0.153338359  | 0.878227204 | 0.933800754 | no |
| COPA         | 0.008524866  | 0.153216176  | 0.878323475 | 0.933851326 | no |
| AP1G1        | -0.008522169 | -0.153167699 | 0.878361672 | 0.933851326 | no |
| OR5K4        | -0.00851778  | -0.153088811 | 0.878423831 | 0.933871212 | no |
| GPR112       | -0.008505899 | -0.152875263 | 0.8785921   | 0.934003899 | no |
| OR6K6        | -0.008498669 | -0.152745301 | 0.878694508 | 0.934066561 | no |
| GLG1         | 0.008486037  | 0.152518247  | 0.878873428 | 0.934210547 | no |
| OR10A3       | 0.00848283   | 0.152460613  | 0.878918845 | 0.934212616 | no |
| FER1L6-AS1   | -0.008476875 | -0.152353567 | 0.879003201 | 0.934256072 | no |
| TMEM55A      | -0.008470999 | -0.152247963 | 0.879086421 | 0.934271615 | no |
| ANKRD13A     | -0.008469704 | -0.15222468  | 0.879104769 | 0.934271615 | no |
| TCEB3CL2     | 0.008462593  | 0.152096868  | 0.879205493 | 0.934312665 | no |
| OR8K1        | 0.008459081  | 0.152033739  | 0.879255243 | 0.934312665 | no |
| MOGAT2       | -0.008455933 | -0.15197715  | 0.87929984  | 0.934312665 | no |
| PPP2R2A      | -0.008452198 | -0.151910023 | 0.879352743 | 0.934312665 | no |
| KLRG2        | -0.008451631 | -0.151899839 | 0.879360768 | 0.934312665 | no |
| ARHGAP20     | 0.008439183  | 0.15167609   | 0.879537107 | 0.934420846 | no |
| NPHS2        | 0.008438305  | 0.151660307  | 0.879549546 | 0.934420846 | no |
| LOC100132215 | -0.00842764  | -0.151468622 | 0.879700619 | 0.934484578 | no |
| PIBF1        | 0.008425221  | 0.151425139  | 0.87973489  | 0.934484578 | no |
| TTC18        | -0.008421386 | -0.151356209 | 0.879789218 | 0.934484578 | no |
| CWC22        | -0.008419939 | -0.151330197 | 0.879809719 | 0.934484578 | no |
| CNBD1        | 0.008418723  | 0.151308337  | 0.879826949 | 0.934484578 | no |
| SNORA10      | 0.008405246  | 0.151066113  | 0.880017865 | 0.934641163 | no |
| OR56B1       | 0.008397876  | 0.150933632  | 0.880122287 | 0.934667397 | no |
| OR9K2        | -0.008397363 | -0.15092442  | 0.880129548 | 0.934667397 | no |
| CMC2         | -0.008380452 | -0.150620456 | 0.880369141 | 0.934755608 | no |
| METTL7A      | -0.008377561 | -0.150568483 | 0.880410109 | 0.934755608 | no |
| CHP1         | 0.008375101  | 0.150524279  | 0.880444953 | 0.934755608 | no |
| FOXI3        | 0.008372984  | 0.15048623   | 0.880474945 | 0.934755608 | no |
| KDM5C        | 0.008372099  | 0.150470309  | 0.880487495 | 0.934755608 | no |
| FSCN3        | -0.008371961 | -0.150467832 | 0.880489448 | 0.934755608 | no |
| PPP1R16A     | 0.008370011  | 0.150432779  | 0.880517079 | 0.934755608 | no |
| DEFB123      | -0.008353287 | -0.150132183 | 0.880754035 | 0.934900799 | no |
| CYP4F3       | 0.008352058  | 0.150110101  | 0.880771442 | 0.934900799 | no |

|              |              |              |             |             |    |
|--------------|--------------|--------------|-------------|-------------|----|
| SLC25A52     | 0.008351147  | 0.150093727  | 0.88078435  | 0.934900799 | no |
| NXF5         | -0.008337524 | -0.149848864 | 0.880977382 | 0.93500829  | no |
| GRAMD2       | -0.008336999 | -0.149839435 | 0.880984815 | 0.93500829  | no |
| PRSS33       | -0.008334789 | -0.149799699 | 0.88101614  | 0.93500829  | no |
| C1QTNF3      | 0.008326436  | 0.149649564  | 0.8811345   | 0.935079726 | no |
| HULC         | 0.008323897  | 0.149603936  | 0.881170472 | 0.935079726 | no |
| SNORA33      | -0.008308356 | -0.149324588 | 0.881390705 | 0.935267251 | no |
| CYP2A13      | -0.008305012 | -0.149264497 | 0.881438081 | 0.935271344 | no |
| TTI1         | -0.008286257 | -0.148927379 | 0.881703874 | 0.935419578 | no |
| ABTB1        | 0.008285031  | 0.148905343  | 0.881721249 | 0.935419578 | no |
| PRICKLE1     | -0.008283716 | -0.148881724 | 0.881739871 | 0.935419578 | no |
| NEK9         | 0.008282869  | 0.148866484  | 0.881751887 | 0.935419578 | no |
| GIP          | -0.008277082 | -0.148762477 | 0.881833893 | 0.935460397 | no |
| LOC285740    | 0.008270575  | 0.148645511  | 0.881926117 | 0.935512053 | no |
| AGBL1        | 0.008261566  | 0.148483594  | 0.882053788 | 0.935601301 | no |
| GDF7         | 0.008244599  | 0.148178624  | 0.882294262 | 0.935810186 | no |
| SF3B1        | 0.008239746  | 0.148091389  | 0.88236305  | 0.935836959 | no |
| ZBTB34       | 0.008223497  | 0.147799332  | 0.882593356 | 0.936008483 | no |
| MAF1         | -0.00822219  | -0.147775842 | 0.88261188  | 0.936008483 | no |
| LOC100270679 | -0.008216685 | -0.147676891 | 0.882689911 | 0.936026096 | no |
| GPR113       | -0.008214872 | -0.147644319 | 0.882715597 | 0.936026096 | no |
| LOC401324    | 0.008199129  | 0.147361341  | 0.882938758 | 0.936216541 | no |
| AURKB        | -0.008181309 | -0.147041053 | 0.883191353 | 0.936376306 | no |
| DDX3Y        | 0.008179554  | 0.147009499  | 0.883216239 | 0.936376306 | no |
| NAPA-AS1     | -0.008179278 | -0.147004549 | 0.883220143 | 0.936376306 | no |
| GCNT3        | -0.008175249 | -0.146932124 | 0.883277263 | 0.936390669 | no |
| C17orf98     | -0.00815773  | -0.146617235 | 0.883525616 | 0.936607754 | no |
| OR2T6        | -0.008147137 | -0.146426848 | 0.883675779 | 0.936687939 | no |
| AVPR2        | -0.008146245 | -0.146410814 | 0.883688426 | 0.936687939 | no |
| CSNK1A1P1    | 0.008139359  | 0.146287049  | 0.883786046 | 0.936725809 | no |
| PCNAP1       | 0.008137576  | 0.146254996  | 0.883811327 | 0.936725809 | no |
| SLC39A1      | -0.00812259  | -0.145985633 | 0.884023794 | 0.936904792 | no |
| TMEM203      | 0.008107461  | 0.145713714  | 0.884238286 | 0.937085902 | no |
| BDH2         | 0.008101718  | 0.145610485  | 0.884319716 | 0.937123801 | no |
| OR2A2        | 0.008098072  | 0.145544943  | 0.884371418 | 0.937123801 | no |
| DBF4         | -0.008092911 | -0.145452177 | 0.884444596 | 0.937123801 | no |
| HOXA-AS3     | -0.008092637 | -0.145447267 | 0.884448469 | 0.937123801 | no |
| C10orf129    | -0.008089264 | -0.145386633 | 0.8844963   | 0.937128278 | no |
| LINC00277    | 0.00808116   | 0.145240981  | 0.884611201 | 0.937203812 | no |
| RPS9         | 0.008075196  | 0.145133783  | 0.884695767 | 0.937247202 | no |
| UNC5C        | -0.008068343 | -0.145010604 | 0.884792943 | 0.937296399 | no |
| GRASP        | -0.00806577  | -0.14496435  | 0.884829433 | 0.937296399 | no |
| DEFB132      | -0.008043749 | -0.144568555 | 0.885141688 | 0.937552521 | no |
| DMBX1        | -0.008042566 | -0.144547286 | 0.885158468 | 0.937552521 | no |
| ZBTB10       | -0.008034018 | -0.144393636 | 0.885279693 | 0.937634709 | no |
| TRHR         | 0.00800245   | 0.143826252  | 0.885727362 | 0.938062623 | no |
| PCDHGA5      | -0.007982676 | -0.14347083  | 0.886007811 | 0.938313402 | no |
| FAM110A      | -0.00797954  | -0.143414466 | 0.886052287 | 0.938314265 | no |
| CACNA1C-AS4  | -0.007973645 | -0.143308509 | 0.886135897 | 0.938356568 | no |
| LGR4         | 0.007969847  | 0.143240233  | 0.886189774 | 0.938367384 | no |
| DNAH8        | -0.007961995 | -0.143099112 | 0.886301134 | 0.938439063 | no |

|              |              |              |             |             |    |
|--------------|--------------|--------------|-------------|-------------|----|
| TEX12        | -0.00795666  | -0.143003213 | 0.88637681  | 0.938472954 | no |
| LOC100631378 | -0.007949739 | -0.142878816 | 0.886474977 | 0.938530653 | no |
| TBX5-AS1     | -0.007943177 | -0.142760878 | 0.886568048 | 0.938547055 | no |
| FAM135A      | 0.007942489  | 0.142748506  | 0.886577812 | 0.938547055 | no |
| STARD13      | 0.007936709  | 0.142644613  | 0.886659801 | 0.938587616 | no |
| SARNP        | 0.007930134  | 0.142526441  | 0.886753059 | 0.938640102 | no |
| IMPG2        | -0.007921467 | -0.142370656 | 0.886876004 | 0.938724006 | no |
| ABCD3        | 0.00791572   | 0.142267373  | 0.886957516 | 0.938764047 | no |
| RHEBL1       | -0.007907564 | -0.142120763 | 0.887073224 | 0.938808344 | no |
| OR56A3       | -0.007906611 | -0.142103643 | 0.887086736 | 0.938808344 | no |
| SLC25A34     | 0.007896857  | 0.141928326  | 0.887225103 | 0.938908543 | no |
| NKD2         | -0.007869509 | -0.141436772 | 0.887613078 | 0.939272867 | no |
| OR5B17       | 0.007862752  | 0.141315317  | 0.887708944 | 0.939325565 | no |
| FLJ45079     | 0.007856066  | 0.141195158  | 0.887803789 | 0.939325565 | no |
| PNPLA7       | -0.007855524 | -0.141185412 | 0.887811481 | 0.939325565 | no |
| ECHS1        | -0.007853675 | -0.141152185 | 0.887837709 | 0.939325565 | no |
| LOC339166    | 0.007834591  | 0.14080916   | 0.888108479 | 0.939565784 | no |
| ORAOV1       | -0.007826241 | -0.140659075 | 0.888226954 | 0.939618442 | no |
| GRM8         | -0.00782492  | -0.140635332 | 0.888245697 | 0.939618442 | no |
| OR51G2       | -0.007818828 | -0.140525837 | 0.888332132 | 0.939663624 | no |
| OR8J1        | -0.007804733 | -0.140272502 | 0.888532122 | 0.939828911 | no |
| IQCC         | -0.007794004 | -0.140079654 | 0.888684365 | 0.939943683 | no |
| RMST         | -0.007775629 | -0.139749396 | 0.888945096 | 0.940173182 | no |
| C1QTNF9      | 0.00777041   | 0.139655587  | 0.889019158 | 0.940205243 | no |
| LOC646862    | 0.007753479  | 0.139351272  | 0.889259423 | 0.940413062 | no |
| LARP7        | -0.007748007 | -0.139252922 | 0.889337074 | 0.940448903 | no |
| MEP1A        | 0.007720552  | 0.138759437  | 0.889726719 | 0.940814649 | no |
| MCF2L-AS1    | 0.007698366  | 0.138360684  | 0.890041586 | 0.94110129  | no |
| XRCC6BP1     | 0.007680952  | 0.138047676  | 0.890288757 | 0.941316328 | no |
| OR5AK4P      | 0.007673476  | 0.137913315  | 0.890394861 | 0.941382199 | no |
| CAPN10       | 0.007668065  | 0.137816059  | 0.890471665 | 0.941417087 | no |
| KRTAP10-11   | -0.00766246  | -0.137715316 | 0.890551223 | 0.941454884 | no |
| REX01L1      | -0.007649598 | -0.137484131 | 0.890733797 | 0.941601576 | no |
| OC90         | 0.007639604  | 0.137304499  | 0.890875663 | 0.941705222 | no |
| HOXD9        | 0.007628801  | 0.137110335  | 0.891029008 | 0.941820993 | no |
| TAF1L        | -0.007621102 | -0.136971958 | 0.891138297 | 0.941890186 | no |
| PECR         | 0.007609906  | 0.136770713  | 0.891297243 | 0.941948234 | no |
| FZD9         | 0.007609297  | 0.13675977   | 0.891305886 | 0.941948234 | no |
| OR2J3        | -0.00760652  | -0.136709855 | 0.89134531  | 0.941948234 | no |
| LOC654433    | 0.007604884  | 0.136680448  | 0.891368537 | 0.941948234 | no |
| LIAS         | 0.007597287  | 0.136543916  | 0.891476375 | 0.941950704 | no |
| CCL28        | 0.007595562  | 0.136512905  | 0.891500869 | 0.941950704 | no |
| LOC392364    | -0.007589552 | -0.136404877 | 0.891586196 | 0.941950704 | no |
| PTK6         | 0.007588316  | 0.136382661  | 0.891603743 | 0.941950704 | no |
| LINC00266-1  | -0.007587377 | -0.136365782 | 0.891617075 | 0.941950704 | no |
| C17orf85     | 0.007586195  | 0.136344539  | 0.891633855 | 0.941950704 | no |
| KHDC1        | 0.007569986  | 0.136053205  | 0.891863975 | 0.942147497 | no |
| SPECC1L      | 0.007565917  | 0.135980065  | 0.891921748 | 0.942162216 | no |
| CTPS1        | 0.007543696  | 0.13558068   | 0.892237234 | 0.942419343 | no |
| ZNF836       | 0.007542595  | 0.13556089   | 0.892252868 | 0.942419343 | no |
| KCNRG        | 0.007527184  | 0.135283901  | 0.89247168  | 0.942604132 | no |



|              |              |              |             |             |    |
|--------------|--------------|--------------|-------------|-------------|----|
| HAND1        | -0.007520719 | -0.135167696 | 0.89256348  | 0.942628474 | no |
| C10orf113    | 0.007517071  | 0.13510213   | 0.892615277 | 0.942628474 | no |
| SPANXC       | 0.007515842  | 0.135080031  | 0.892632736 | 0.942628474 | no |
| OR1N2        | -0.00751099  | -0.134992826 | 0.892701628 | 0.942628474 | no |
| WNT3A        | -0.007510116 | -0.134977122 | 0.892714035 | 0.942628474 | no |
| PRDM4        | 0.007494245  | 0.134691865  | 0.892939397 | 0.942820113 | no |
| C21orf62     | 0.0074805    | 0.134444809  | 0.893134585 | 0.942948634 | no |
| TGM3         | -0.007478157 | -0.134402695 | 0.893167859 | 0.942948634 | no |
| S100B        | -0.007476404 | -0.134371193 | 0.893192748 | 0.942948634 | no |
| FAM83B       | -0.007470832 | -0.134271034 | 0.893271882 | 0.942984482 | no |
| TGIF2-C20orf | -0.007467833 | -0.134217143 | 0.893314461 | 0.942984482 | no |
| FABP2        | 0.007463901  | 0.134146458  | 0.893370309 | 0.942997118 | no |
| SPARC        | -0.007459788 | -0.134072531 | 0.89342872  | 0.943012456 | no |
| SYCP2        | -0.007449997 | -0.133896555 | 0.893567762 | 0.943112895 | no |
| NALCN-AS1    | -0.007446767 | -0.133838506 | 0.893613628 | 0.943114987 | no |
| C5orf34      | -0.007407814 | -0.133138381 | 0.894166849 | 0.943613968 | no |
| DCAF10       | -0.007404308 | -0.13307535  | 0.894216657 | 0.943613968 | no |
| HILS1        | 0.007404203  | 0.133073471  | 0.894218141 | 0.943613968 | no |
| MGST3        | 0.007390932  | 0.132834947  | 0.894406631 | 0.943669595 | no |
| FAM229A      | -0.007390261 | -0.132822889 | 0.894416159 | 0.943669595 | no |
| BPIFB1       | -0.007389982 | -0.132817859 | 0.894420134 | 0.943669595 | no |
| ALKBH1       | 0.007388126  | 0.1327845    | 0.894446496 | 0.943669595 | no |
| PMS2P5       | 0.007374249  | 0.132535088  | 0.894643596 | 0.94376298  | no |
| OR51T1       | -0.007372891 | -0.132510672 | 0.894662892 | 0.94376298  | no |
| FNBP1        | 0.007372619  | 0.132505787  | 0.894666753 | 0.94376298  | no |
| FAM175A      | 0.007364474  | 0.132359393  | 0.894782445 | 0.943807454 | no |
| RPSAP58      | 0.007362584  | 0.13232543   | 0.894809286 | 0.943807454 | no |
| FOXM1        | -0.007360375 | -0.132285728 | 0.894840663 | 0.943807454 | no |
| GAK          | -0.00734301  | -0.131973609 | 0.895087336 | 0.944005163 | no |
| FANCB        | 0.007340995  | 0.131937384  | 0.895115966 | 0.944005163 | no |
| OR2L5        | -0.007332665 | -0.131787671 | 0.89523429  | 0.944083622 | no |
| CFHR2        | 0.007322249  | 0.131600455  | 0.895382259 | 0.944158164 | no |
| DUSP15       | 0.007321504  | 0.131587066  | 0.895392841 | 0.944158164 | no |
| MOGAT3       | -0.007307836 | -0.131341412 | 0.895587003 | 0.944316568 | no |
| MORN5        | 0.007294102  | 0.131094547  | 0.895782128 | 0.944445096 | no |
| PSPH         | 0.00729307   | 0.131075996  | 0.895796791 | 0.944445096 | no |
| NLRP10       | -0.007287046 | -0.130967738 | 0.895882361 | 0.944445447 | no |
| CEP128       | -0.00728686  | -0.13096438  | 0.895885016 | 0.944445447 | no |
| ATP8B5P      | -0.007283517 | -0.130904295 | 0.89593251  | 0.944449187 | no |
| MAP2K4P1     | 0.007270974  | 0.130678865  | 0.896110702 | 0.944572148 | no |
| OR2AP1       | -0.007269119 | -0.130645522 | 0.896137059 | 0.944572148 | no |
| SEMG2        | 0.00726435   | 0.130559805  | 0.896204816 | 0.944597239 | no |
| WFDC6        | 0.007236067  | 0.130051457  | 0.896606669 | 0.944902911 | no |
| DOCK1        | 0.007234088  | 0.130015879  | 0.896634794 | 0.944902911 | no |
| TRIM66       | 0.007232614  | 0.129989388  | 0.896655736 | 0.944902911 | no |
| C8G          | 0.007230295  | 0.12994771   | 0.896688685 | 0.944902911 | no |
| SNUPN        | -0.007228467 | -0.129914846 | 0.896714665 | 0.944902911 | no |
| UAP1L1       | 0.007208157  | 0.129549819  | 0.897003243 | 0.945092658 | no |
| PATE4        | 0.007207491  | 0.129537848  | 0.897012707 | 0.945092658 | no |
| ZNF137P      | 0.007206505  | 0.129520119  | 0.897026723 | 0.945092658 | no |
| IKZF2        | 0.007203414  | 0.129464569  | 0.897070641 | 0.945092658 | no |

|              |              |              |             |             |    |
|--------------|--------------|--------------|-------------|-------------|----|
| MKI67IP      | -0.007194381 | -0.129302202 | 0.897199008 | 0.945132952 | no |
| USP26        | 0.007192052  | 0.129260339  | 0.897232106 | 0.945132952 | no |
| NAP1L6       | -0.007191438 | -0.129249315 | 0.897240821 | 0.945132952 | no |
| ZNF585B      | -0.007185615 | -0.129144646 | 0.897323575 | 0.945173795 | no |
| ACSL3        | 0.007165782  | 0.128788184  | 0.89760541  | 0.945424322 | no |
| PIGO         | 0.007158559  | 0.128658355  | 0.897708062 | 0.945486104 | no |
| CIDEC        | 0.007135345  | 0.12824112   | 0.898037968 | 0.945787218 | no |
| GGPS1        | 0.00712835   | 0.128115386  | 0.898137389 | 0.945845573 | no |
| BARX2        | 0.007058917  | 0.126867434  | 0.899124262 | 0.946838471 | no |
| OR6C4        | -0.007040182 | -0.126530699 | 0.899390577 | 0.947072512 | no |
| CT47B1       | 0.007031455  | 0.126373847  | 0.899514631 | 0.947131317 | no |
| PSG4         | 0.007030053  | 0.126348645  | 0.899534564 | 0.947131317 | no |
| LOC153684    | 0.00702252   | 0.126213246  | 0.899641653 | 0.947197666 | no |
| USH2A        | 0.007011687  | 0.126018547  | 0.899795647 | 0.94731339  | no |
| LCN10        | -0.007006793 | -0.125930589 | 0.899865217 | 0.947340226 | no |
| OR5M8        | 0.007002162  | 0.125847348  | 0.899931057 | 0.947363132 | no |
| XPOT         | -0.006991184 | -0.125650029 | 0.90008713  | 0.94748102  | no |
| OR8K3        | -0.006980988 | -0.125466771 | 0.900232085 | 0.947587194 | no |
| CEACAM1      | -0.006970664 | -0.12528121  | 0.900378865 | 0.947695279 | no |
| SYT14L       | -0.006965691 | -0.125191828 | 0.900449568 | 0.94772328  | no |
| LOC100133091 | -0.006957066 | -0.125036811 | 0.900572192 | 0.947778546 | no |
| BSPRY        | 0.006955794  | 0.125013946  | 0.900590279 | 0.947778546 | no |
| MAGEA3       | 0.006948915  | 0.124890317  | 0.900688075 | 0.947835052 | no |
| YPEL5        | -0.006943978 | -0.124801576 | 0.900758275 | 0.947851443 | no |
| THOC6        | 0.006941616  | 0.12475912   | 0.90079186  | 0.947851443 | no |
| OR5L2        | -0.006929513 | -0.124541581 | 0.90096395  | 0.947986108 | no |
| SGK2         | -0.006920873 | -0.124386303 | 0.901086791 | 0.948068942 | no |
| OR7C2        | -0.006916232 | -0.124302876 | 0.90115279  | 0.948091967 | no |
| LOC100129269 | 0.006905258  | 0.124105635  | 0.901308832 | 0.948168981 | no |
| SCARB2       | -0.006904878 | -0.124098813 | 0.901314229 | 0.948168981 | no |
| MESP2        | -0.006899307 | -0.123998675 | 0.901393452 | 0.948205907 | no |
| MCM8         | -0.006888848 | -0.123810695 | 0.901542173 | 0.948283463 | no |
| GJB4         | 0.006887916  | 0.123793941  | 0.901555428 | 0.948283463 | no |
| GGH          | -0.00687919  | -0.123637118 | 0.901679502 | 0.948367551 | no |
| IYD          | 0.006869711  | 0.123466744  | 0.901814299 | 0.94846291  | no |
| FAM170A      | -0.006863529 | -0.123355629 | 0.901902214 | 0.948470973 | no |
| SNORA80      | -0.006862965 | -0.123345495 | 0.901910232 | 0.948470973 | no |
| CNPY1        | 0.006855199  | 0.123205911  | 0.902020672 | 0.948476482 | no |
| CA5BP1       | -0.006852715 | -0.123161264 | 0.902055998 | 0.948476482 | no |
| MLLT10       | 0.006849546  | 0.123104298  | 0.902101071 | 0.948476482 | no |
| GIPR         | -0.006847163 | -0.123061467 | 0.902134961 | 0.948476482 | no |
| PARL         | -0.00684708  | -0.123059977 | 0.90213614  | 0.948476482 | no |
| MAT2B        | 0.006840881  | 0.122948571  | 0.902224288 | 0.948496386 | no |
| AKR1C1       | -0.006838486 | -0.12290552  | 0.902258352 | 0.948496386 | no |
| ZGPAT        | 0.006836438  | 0.122868715  | 0.902287474 | 0.948496386 | no |
| RSBN1L-AS1   | 0.006829458  | 0.122743249  | 0.902386751 | 0.948554349 | no |
| TTY11        | -0.006817519 | -0.12252867  | 0.902556542 | 0.948640118 | no |
| FAM72D       | 0.006817143  | 0.122521916  | 0.902561887 | 0.948640118 | no |
| HHIPL2       | 0.006811888  | 0.12242745   | 0.902636636 | 0.948640118 | no |
| MRPL49       | 0.006809164  | 0.122378503  | 0.902675368 | 0.948640118 | no |
| KCNJ16       | -0.006808202 | -0.12236121  | 0.902689052 | 0.948640118 | no |

|              |              |              |             |             |    |
|--------------|--------------|--------------|-------------|-------------|----|
| RNF223       | 0.006784192  | 0.121929672  | 0.903030538 | 0.948923028 | no |
| GSG2         | 0.00678259   | 0.121900865  | 0.903053334 | 0.948923028 | no |
| FAM216B      | -0.006779961 | -0.121853622 | 0.903090721 | 0.948923028 | no |
| KLF14        | -0.00677454  | -0.12175618  | 0.903167832 | 0.948957655 | no |
| CA5B         | 0.006771066  | 0.121693745  | 0.903217241 | 0.948963174 | no |
| PKD2L2       | -0.006762401 | -0.121538016 | 0.903340481 | 0.949046259 | no |
| LOC100287010 | -0.006743316 | -0.121194984 | 0.903611956 | 0.949216655 | no |
| LOC100506134 | 0.006742447  | 0.12117937   | 0.903624313 | 0.949216655 | no |
| PKHD1L1      | 0.006739014  | 0.121117665  | 0.903673148 | 0.949216655 | no |
| MFGE8        | -0.006738579 | -0.121109837 | 0.903679343 | 0.949216655 | no |
| PLAC9        | 0.006733252  | 0.121014107  | 0.903755106 | 0.949247501 | no |
| SPRTN        | 0.006730304  | 0.120961113  | 0.903797048 | 0.949247501 | no |
| SGPL1        | 0.006721273  | 0.120798796  | 0.903925513 | 0.949289663 | no |
| TPD52L1      | -0.006721271 | -0.120798768 | 0.903925535 | 0.949289663 | no |
| LINC00028    | -0.006715558 | -0.120696082 | 0.904006806 | 0.949312123 | no |
| ZIC1         | 0.006713558  | 0.120660124  | 0.904035266 | 0.949312123 | no |
| CAAP1        | -0.006707583 | -0.120552747 | 0.904120252 | 0.949348275 | no |
| FJX1         | -0.006704927 | -0.120505001 | 0.904158042 | 0.949348275 | no |
| LINC00696    | -0.006698726 | -0.120393551 | 0.904246254 | 0.949391907 | no |
| PSMF1        | 0.006691953  | 0.120271817  | 0.904342606 | 0.949391907 | no |
| KDM2A        | 0.006690189  | 0.120240118  | 0.904367696 | 0.949391907 | no |
| FOXA1        | -0.006689584 | -0.120229244 | 0.904376303 | 0.949391907 | no |
| ABCG1        | -0.006678873 | -0.120036727 | 0.904528683 | 0.94946349  | no |
| UCHL1        | -0.006675241 | -0.119971451 | 0.904580351 | 0.94946349  | no |
| CENPM        | 0.006672459  | 0.119921449  | 0.904619929 | 0.94946349  | no |
| SAAL1        | 0.006672369  | 0.119919831  | 0.90462121  | 0.94946349  | no |
| UNC45B       | -0.006656018 | -0.119625935 | 0.904853844 | 0.949541496 | no |
| TTC40        | 0.006655774  | 0.119621548  | 0.904857316 | 0.949541496 | no |
| NEK2         | -0.006651523 | -0.119545158 | 0.904917784 | 0.949541496 | no |
| LINC00692    | -0.006651465 | -0.119544102 | 0.90491862  | 0.949541496 | no |
| KLK15        | -0.006650996 | -0.119535671 | 0.904925294 | 0.949541496 | no |
| PHC3         | 0.006646329  | 0.1194518    | 0.904991684 | 0.949541496 | no |
| TRIM39       | 0.006645406  | 0.119435214  | 0.905004814 | 0.949541496 | no |
| MAT2A        | 0.006625649  | 0.119080112  | 0.905285913 | 0.949790058 | no |
| NUDT9        | -0.006597894 | -0.11858126  | 0.905680825 | 0.950116579 | no |
| OR4C11       | -0.006593677 | -0.118505457 | 0.905740835 | 0.950116579 | no |
| MYF6         | -0.006592248 | -0.118479785 | 0.905761159 | 0.950116579 | no |
| IRF3         | -0.006589767 | -0.118435191 | 0.905796463 | 0.950116579 | no |
| OR4A16       | -0.006588241 | -0.118407755 | 0.905818183 | 0.950116579 | no |
| F12          | -0.006581065 | -0.118278789 | 0.905920284 | 0.950177298 | no |
| IDUA         | -0.006559235 | -0.117886422 | 0.906230925 | 0.950418192 | no |
| BUD13        | -0.006558709 | -0.117876974 | 0.906238406 | 0.950418192 | no |
| SLC25A47     | -0.006546519 | -0.117657883 | 0.906411869 | 0.950553724 | no |
| LINC00636    | 0.006541527  | 0.117568149  | 0.906482916 | 0.95055568  | no |
| TRIM68       | -0.006540172 | -0.117543801 | 0.906502194 | 0.95055568  | no |
| OR10W1       | 0.006531151  | 0.117381664  | 0.90663057  | 0.95064391  | no |
| MFAP1        | -0.006522028 | -0.117217691 | 0.906760401 | 0.95069283  | no |
| KIR2DL5A     | -0.006521656 | -0.117211    | 0.906765699 | 0.95069283  | no |
| AGTR2        | -0.006518431 | -0.117153034 | 0.906811596 | 0.95069457  | no |
| GPC5-AS1     | 0.006505318  | 0.116917354  | 0.906998209 | 0.950809373 | no |
| SELT         | 0.006504519  | 0.116902989  | 0.907009584 | 0.950809373 | no |

|              |              |              |             |             |    |
|--------------|--------------|--------------|-------------|-------------|----|
| COMMD5       | 0.006499642  | 0.116815344  | 0.907078983 | 0.950835744 | no |
| TAS2R38      | -0.006489486 | -0.116632805 | 0.907223524 | 0.950940875 | no |
| RPGRIP1L     | 0.006481939  | 0.116497163  | 0.907330933 | 0.95096908  | no |
| RNASEK-C17or | -0.006481377 | -0.116487061 | 0.907338932 | 0.95096908  | no |
| OR5E1P       | 0.006465882  | 0.116208566  | 0.907559465 | 0.951153831 | no |
| HBM          | 0.006452897  | 0.115975181  | 0.907744282 | 0.951301134 | no |
| HYDIN        | -0.006448077 | -0.11588854  | 0.907812894 | 0.951326648 | no |
| GPR150       | -0.006441013 | -0.115761577 | 0.907913438 | 0.951342097 | no |
| RBM1A3P      | 0.006440821  | 0.115758127  | 0.90791617  | 0.951342097 | no |
| TSPAN15      | 0.006434882  | 0.115651378  | 0.908000708 | 0.951377112 | no |
| ALS2CR12     | -0.006431446 | -0.115589628 | 0.90804961  | 0.951377112 | no |
| TMEM215      | 0.006424742  | 0.115469144  | 0.908145027 | 0.951377112 | no |
| OR52N4       | -0.006423347 | -0.115444057 | 0.908164896 | 0.951377112 | no |
| EXOC4        | -0.006422923 | -0.115436437 | 0.90817093  | 0.951377112 | no |
| RNASE7       | -0.006416097 | -0.115313762 | 0.908268084 | 0.951432511 | no |
| CHMP2A       | 0.00641265   | 0.115251809  | 0.908317149 | 0.951437533 | no |
| AHDC1        | -0.006407343 | -0.115156415 | 0.908392699 | 0.951470295 | no |
| MAP1LC3A     | -0.006402526 | -0.115069843 | 0.908461263 | 0.951495736 | no |
| LOC401052    | -0.006379587 | -0.114657554 | 0.908787799 | 0.951771529 | no |
| OVCH2        | -0.006377806 | -0.114625539 | 0.908813156 | 0.951771529 | no |
| TMPO-AS1     | 0.006369516  | 0.114476541  | 0.908931168 | 0.951848735 | no |
| KIR2DS1      | -0.006360395 | -0.114312612 | 0.909061008 | 0.95193832  | no |
| ZNHIT2       | -0.006356559 | -0.114243665 | 0.909115619 | 0.951949121 | no |
| RBPJL        | -0.006344714 | -0.114030767 | 0.90928425  | 0.952079309 | no |
| SNHG9        | 0.006339046  | 0.113928897  | 0.90936494  | 0.952117408 | no |
| SCLY         | -0.006326251 | -0.113698933 | 0.909547096 | 0.952236426 | no |
| METTL15      | -0.006324837 | -0.113673514 | 0.909567231 | 0.952236426 | no |
| C12orf52     | -0.006318638 | -0.11356209  | 0.909655492 | 0.952275342 | no |
| SLC4A1       | 0.0063151    | 0.113498505  | 0.909705859 | 0.952275342 | no |
| ZNF26        | -0.006309468 | -0.11339729  | 0.909786035 | 0.952275342 | no |
| CENPC1       | -0.006304695 | -0.113311501 | 0.909853994 | 0.952275342 | no |
| SPEG         | -0.006302664 | -0.113274988 | 0.909882917 | 0.952275342 | no |
| HOXC10       | -0.00630195  | -0.113262155 | 0.909893082 | 0.952275342 | no |
| GIMAP1-GIMAF | 0.00630044   | 0.113235023  | 0.909914576 | 0.952275342 | no |
| HOXC9        | -0.006294444 | -0.113127251 | 0.909999948 | 0.952281565 | no |
| RTN4IP1      | -0.006293798 | -0.113115643 | 0.910009144 | 0.952281565 | no |
| ZNF823       | 0.006289791  | 0.113043627  | 0.910066192 | 0.952294894 | no |
| NINL         | -0.006274993 | -0.112777646 | 0.910276899 | 0.952469002 | no |
| NPVF         | -0.006268202 | -0.112655601 | 0.910373583 | 0.952492986 | no |
| OR13H1       | -0.006267157 | -0.11263682  | 0.910388462 | 0.952492986 | no |
| TOPAZ1       | -0.006258868 | -0.112487836 | 0.91050649  | 0.952570099 | no |
| ANXA2P2      | 0.006248013  | 0.11229273   | 0.910661059 | 0.952685432 | no |
| SOX10        | -0.006243533 | -0.112212217 | 0.910724845 | 0.952705785 | no |
| ADAMTS10     | -0.006234433 | -0.112048659 | 0.910854425 | 0.952789164 | no |
| VAPA         | -0.006228123 | -0.111935247 | 0.910944277 | 0.952789164 | no |
| FIGLA        | -0.006223699 | -0.111855732 | 0.911007276 | 0.952789164 | no |
| SHFM1        | 0.006223614  | 0.111854202  | 0.911008487 | 0.952789164 | no |
| PYROXD1      | 0.006222368  | 0.111831819  | 0.911026221 | 0.952789164 | no |
| RNGTT        | -0.00621418  | -0.111684652 | 0.91114282  | 0.952796474 | no |
| FBXO16       | -0.006205486 | -0.111528387 | 0.911266629 | 0.952796474 | no |
| TDG          | 0.006204126  | 0.111503951  | 0.91128599  | 0.952796474 | no |

|              |              |              |             |             |    |
|--------------|--------------|--------------|-------------|-------------|----|
| KBTBD12      | 0.006202063  | 0.111466861  | 0.911315377 | 0.952796474 | no |
| MAGEB3       | -0.00620011  | -0.111431767 | 0.911343182 | 0.952796474 | no |
| ZNF784       | 0.006196366  | 0.111364467  | 0.911396506 | 0.952796474 | no |
| PIK3CA       | -0.006188535 | -0.111223722 | 0.911508022 | 0.952796474 | no |
| KRT76        | -0.006183429 | -0.111131956 | 0.911580732 | 0.952796474 | no |
| TDP1         | 0.006183164  | 0.111127196  | 0.911584503 | 0.952796474 | no |
| TRIM27       | -0.006181652 | -0.111100007 | 0.911606046 | 0.952796474 | no |
| CPOX         | -0.006177623 | -0.111027605 | 0.911663414 | 0.952796474 | no |
| ZMYND15      | 0.006172624  | 0.110937754  | 0.911734608 | 0.952796474 | no |
| OGFOD3       | 0.006172167  | 0.110929533  | 0.911741122 | 0.952796474 | no |
| SUPT4H1      | -0.006172045 | -0.110927344 | 0.911742857 | 0.952796474 | no |
| REG4         | -0.006171814 | -0.110923198 | 0.911746142 | 0.952796474 | no |
| GEMIN8       | -0.006169036 | -0.110873257 | 0.911785713 | 0.952796474 | no |
| KRTAP19-3    | -0.006168952 | -0.110871759 | 0.9117869   | 0.952796474 | no |
| CAPZA3       | 0.00614499   | 0.110441076  | 0.912128167 | 0.953084011 | no |
| PACSN3       | -0.006143404 | -0.110412568 | 0.912150757 | 0.953084011 | no |
| MOCS1        | -0.006131913 | -0.11020605  | 0.912314406 | 0.953208658 | no |
| GLUL         | 0.006118243  | 0.109960348  | 0.912509108 | 0.953350155 | no |
| CYB5R3       | -0.006113419 | -0.109873649 | 0.912577814 | 0.953350155 | no |
| KIAA1614     | 0.006113061  | 0.109867213  | 0.912582913 | 0.953350155 | no |
| GHRHR        | -0.006099195 | -0.109617997 | 0.912780409 | 0.953510124 | no |
| NGFR         | 0.006091442  | 0.109478643  | 0.912890844 | 0.953579136 | no |
| LOC100130348 | -0.006083953 | -0.10934404  | 0.912997517 | 0.953644211 | no |
| C12orf56     | -0.00607727  | -0.109223937 | 0.913092699 | 0.953697278 | no |
| VAV2         | -0.006067178 | -0.109042556 | 0.913236447 | 0.953709363 | no |
| HIST1H4D     | -0.006066024 | -0.109021813 | 0.913252887 | 0.953709363 | no |
| ASZ1         | -0.006057577 | -0.108869982 | 0.913373218 | 0.953709363 | no |
| LOC100131347 | 0.006056252  | 0.108846181  | 0.913392081 | 0.953709363 | no |
| SNORA7B      | -0.00605172  | -0.108764725 | 0.913456639 | 0.953709363 | no |
| LMO4         | -0.006050327 | -0.10873969  | 0.91347648  | 0.953709363 | no |
| TEKT5        | -0.006049881 | -0.10873167  | 0.913482837 | 0.953709363 | no |
| CLMN         | 0.006045345  | 0.108650131  | 0.913547461 | 0.953709363 | no |
| PRAMEF22     | -0.006039894 | -0.10855216  | 0.91362511  | 0.953709363 | no |
| GAS7         | -0.006038516 | -0.108527394 | 0.913644738 | 0.953709363 | no |
| OR4D9        | -0.006037691 | -0.10851258  | 0.91365648  | 0.953709363 | no |
| LOC440910    | 0.006037573  | 0.108510446  | 0.913658171 | 0.953709363 | no |
| OR5F1        | -0.006035958 | -0.108481425 | 0.913681172 | 0.953709363 | no |
| TRABD2A      | 0.006019044  | 0.108177425  | 0.913922119 | 0.953914535 | no |
| OR52B4       | -0.006013186 | -0.108072139 | 0.914005569 | 0.953930942 | no |
| CSNK2B       | -0.006010171 | -0.108017945 | 0.914048524 | 0.953930942 | no |
| KNG1         | 0.006008593  | 0.107989587  | 0.914071002 | 0.953930942 | no |
| ASAP1        | 0.005988668  | 0.107631476  | 0.914354852 | 0.954180836 | no |
| STAG3L4      | 0.00597602   | 0.107404155  | 0.91453504  | 0.954221075 | no |
| LOC100507053 | -0.005968396 | -0.107267118 | 0.914643665 | 0.954221075 | no |
| IFT80        | 0.0059683    | 0.107265397  | 0.914645029 | 0.954221075 | no |
| LYRM4        | 0.005968292  | 0.10726526   | 0.914645138 | 0.954221075 | no |
| FAM71F2      | 0.005964166  | 0.1071911    | 0.914703924 | 0.954221075 | no |
| MRPS30       | -0.005960448 | -0.107124269 | 0.914756899 | 0.954221075 | no |
| OR52N2       | -0.005959753 | -0.107111786 | 0.914766795 | 0.954221075 | no |
| CPT1B        | -0.005958711 | -0.107093046 | 0.91478165  | 0.954221075 | no |
| STK33        | -0.005956576 | -0.107054675 | 0.914812066 | 0.954221075 | no |

|              |              |              |             |             |    |
|--------------|--------------|--------------|-------------|-------------|----|
| PRDM10       | -0.005954615 | -0.107019442 | 0.914839996 | 0.954221075 | no |
| FLJ41941     | 0.00595168   | 0.106966677  | 0.914881823 | 0.954221075 | no |
| MCM3AP       | -0.005944475 | -0.106837181 | 0.914984476 | 0.954281829 | no |
| ADM2         | 0.005941295  | 0.106780038  | 0.915029774 | 0.954282761 | no |
| INPP5K       | -0.005924988 | -0.106486948 | 0.915262116 | 0.954478753 | no |
| WAPAL        | 0.005918543  | 0.106371098  | 0.915353956 | 0.954515134 | no |
| FAM74A3      | 0.005914842  | 0.106304596  | 0.915406676 | 0.954515134 | no |
| LOC100288842 | -0.005913188 | -0.106274865 | 0.915430246 | 0.954515134 | no |
| INHBE        | -0.00590817  | -0.10618467  | 0.91550175  | 0.954543378 | no |
| HSPA8        | 0.005899391  | 0.106026881  | 0.915626841 | 0.954576382 | no |
| CYP2C8       | 0.005896069  | 0.10596717   | 0.91567418  | 0.954576382 | no |
| ATP6VOC      | 0.00589394   | 0.105928912  | 0.91570451  | 0.954576382 | no |
| DPY19L1P1    | -0.005889298 | -0.105845477 | 0.915770657 | 0.954576382 | no |
| ALX4         | 0.005886128  | 0.105788507  | 0.915815823 | 0.954576382 | no |
| LOC100271722 | 0.005881151  | 0.105699051  | 0.915886745 | 0.954576382 | no |
| BDH1         | 0.005875396  | 0.105595625  | 0.915968742 | 0.954576382 | no |
| SRY          | 0.005875317  | 0.1055942    | 0.915969872 | 0.954576382 | no |
| XPO6         | -0.005873197 | -0.105556098 | 0.916000081 | 0.954576382 | no |
| ENTHD2       | 0.005871691  | 0.105529025  | 0.916021544 | 0.954576382 | no |
| SNORA53      | -0.005871659 | -0.105528455 | 0.916021996 | 0.954576382 | no |
| CRYGN        | -0.005864923 | -0.105407386 | 0.916117984 | 0.954620077 | no |
| SP8          | -0.005862482 | -0.105363515 | 0.916152766 | 0.954620077 | no |
| LPGAT1       | 0.00585896   | 0.105300221  | 0.916202948 | 0.954626082 | no |
| IZUMO2       | -0.005849757 | -0.105134808 | 0.916334097 | 0.954655691 | no |
| UQCR11       | 0.005848911  | 0.105119601  | 0.916346154 | 0.954655691 | no |
| PKLR         | 0.005847345  | 0.105091447  | 0.916368476 | 0.954655691 | no |
| TFEB         | -0.005844497 | -0.105040272 | 0.916409051 | 0.954655691 | no |
| MRPS23       | 0.005837046  | 0.104906357  | 0.916515229 | 0.954720022 | no |
| OSBPL6       | -0.00583069  | -0.104792109 | 0.916605814 | 0.954768105 | no |
| KIAA1191     | -0.005821026 | -0.104618419 | 0.916743532 | 0.954865276 | no |
| SSNA1        | -0.005810572 | -0.104430522 | 0.916892517 | 0.954974173 | no |
| RASSF1       | 0.005804983  | 0.10433007   | 0.916972168 | 0.955010849 | no |
| OR2A14       | 0.005798371  | 0.104211244  | 0.917066389 | 0.955057963 | no |
| OR2J2        | -0.005795572 | -0.104160929 | 0.917106285 | 0.955057963 | no |
| SLC45A2      | -0.005784283 | -0.103958029 | 0.917267175 | 0.955179225 | no |
| C2orf61      | -0.005775788 | -0.103805351 | 0.917388243 | 0.955259011 | no |
| LINC00116    | 0.005768523  | 0.103674772  | 0.917491789 | 0.955320544 | no |
| KLHL14       | -0.005758912 | -0.103502035 | 0.917628767 | 0.955342916 | no |
| CDCA3        | 0.005757439  | 0.10347556   | 0.917649762 | 0.955342916 | no |
| LOC440905    | 0.005755324  | 0.103437548  | 0.917679905 | 0.955342916 | no |
| LOC728537    | 0.005754539  | 0.103423448  | 0.917691087 | 0.955342916 | no |
| MTUS2-AS1    | 0.005739161  | 0.103147055  | 0.91791027  | 0.955468477 | no |
| SNORA45      | -0.005732981 | -0.103035975 | 0.91799836  | 0.955468477 | no |
| RYBP         | -0.005731796 | -0.103014675 | 0.918015251 | 0.955468477 | no |
| NPFFR2       | -0.005731539 | -0.103010068 | 0.918018905 | 0.955468477 | no |
| KRT32        | -0.005727383 | -0.102935363 | 0.918078149 | 0.955468477 | no |
| FAM180A      | -0.005727361 | -0.102934979 | 0.918078454 | 0.955468477 | no |
| LEUTX        | 0.005721199  | 0.102824213  | 0.918166296 | 0.955513624 | no |
| NAA10        | 0.005717861  | 0.102764234  | 0.918213863 | 0.955516857 | no |
| UBXN8        | 0.005711063  | 0.102642037  | 0.918310772 | 0.955553818 | no |
| TUBAL3       | 0.005709131  | 0.102607317  | 0.918338307 | 0.955553818 | no |

|           |              |              |             |             |    |
|-----------|--------------|--------------|-------------|-------------|----|
| HSD3B1    | -0.005694903 | -0.102351605 | 0.918541107 | 0.955718564 | no |
| LCA5      | -0.005688939 | -0.102244411 | 0.918626122 | 0.955760747 | no |
| CDCA8     | -0.005673171 | -0.101961001 | 0.918850897 | 0.955948329 | no |
| LOC157381 | -0.005658185 | -0.101691671 | 0.919064511 | 0.956039767 | no |
| MIR217    | 0.005658068  | 0.101689556  | 0.919066189 | 0.956039767 | no |
| C7orf65   | 0.005656563  | 0.101662517  | 0.919087635 | 0.956039767 | no |
| ART4      | 0.005654522  | 0.101625835  | 0.919116729 | 0.956039767 | no |
| OR5A2     | 0.005644494  | 0.101445597  | 0.919259686 | 0.956142189 | no |
| CISD2     | -0.005640008 | -0.101364976 | 0.919323631 | 0.956162424 | no |
| LCE1B     | -0.005636825 | -0.101307756 | 0.919369017 | 0.956163354 | no |
| SH3GLB1   | -0.005630714 | -0.101197918 | 0.919456138 | 0.956205233 | no |
| TFPT      | -0.005616273 | -0.100938384 | 0.919661999 | 0.956205233 | no |
| LRRC56    | -0.005615375 | -0.100922229 | 0.919674813 | 0.956205233 | no |
| IL36A     | 0.005615279  | 0.100920516  | 0.919676171 | 0.956205233 | no |
| UBE2Q2    | 0.005613257  | 0.100884165  | 0.919705006 | 0.956205233 | no |
| USP8      | -0.005612755 | -0.100875155 | 0.919712152 | 0.956205233 | no |
| RNU12     | -0.005612153 | -0.100864331 | 0.919720738 | 0.956205233 | no |
| LOC595101 | 0.005605997  | 0.100753687  | 0.919808502 | 0.956250218 | no |
| SNORD127  | 0.005589896  | 0.100464298  | 0.920038054 | 0.956442598 | no |
| C5orf51   | 0.005581129  | 0.10030673   | 0.920163045 | 0.956526265 | no |
| VN1R10P   | -0.005565523 | -0.100026247 | 0.920385542 | 0.956643437 | no |
| HERC2P10  | 0.00556125   | 0.099949447  | 0.920446466 | 0.956643437 | no |
| OR8B8     | -0.005556501 | -0.099864102 | 0.920514169 | 0.956643437 | no |
| CLDN6     | 0.005554171  | 0.09982221   | 0.920547401 | 0.956643437 | no |
| LOC285768 | -0.005553652 | -0.099812882 | 0.920554802 | 0.956643437 | no |
| BLNK      | 0.005551559  | 0.099775263  | 0.920584644 | 0.956643437 | no |
| CYP4F12   | -0.005545489 | -0.099666174 | 0.920671185 | 0.956643437 | no |
| C2orf42   | -0.005544517 | -0.099648713 | 0.920685037 | 0.956643437 | no |
| PNPT1     | 0.005543535  | 0.099631047  | 0.920699051 | 0.956643437 | no |
| LYZL1     | -0.005542002 | -0.099603506 | 0.9207209   | 0.956643437 | no |
| PSEN1     | 0.005534325  | 0.099465525  | 0.920830362 | 0.956710917 | no |
| TSSK6     | 0.005530872  | 0.099403456  | 0.920879603 | 0.956715825 | no |
| FOXD2     | -0.005520836 | -0.099223085 | 0.921022697 | 0.956818233 | no |
| CYP4F2    | -0.005514138 | -0.099102703 | 0.921118202 | 0.956871195 | no |
| CSN3      | 0.005493618  | 0.098733887  | 0.921410807 | 0.957128893 | no |
| OR1L1     | 0.005481357  | 0.098513533  | 0.921585633 | 0.957225668 | no |
| IGF2      | -0.005480837 | -0.098504182 | 0.921593053 | 0.957225668 | no |
| DAOA      | -0.005474314 | -0.098386947 | 0.921686067 | 0.957276013 | no |
| OR52K2    | 0.005455463  | 0.098048135  | 0.921954887 | 0.957483112 | no |
| WNT8A     | -0.005450039 | -0.097950654 | 0.922032232 | 0.957483112 | no |
| OR51V1    | -0.005449669 | -0.097944008 | 0.922037505 | 0.957483112 | no |
| PCGEM1    | -0.005447834 | -0.097911023 | 0.922063677 | 0.957483112 | no |
| SCGB1D1   | 0.005440949  | 0.097787276  | 0.922161864 | 0.957538803 | no |
| WDTC1     | -0.005396391 | -0.096986429 | 0.922797323 | 0.958152346 | no |
| OR6C2     | -0.00539282  | -0.096922256 | 0.922848245 | 0.958158928 | no |
| ASB5      | -0.005370486 | -0.096520845 | 0.923166779 | 0.958437419 | no |
| TRMT61B   | 0.005367759  | 0.096471838  | 0.923205668 | 0.958437419 | no |
| SERPINB7  | -0.005357205 | -0.096282148 | 0.923356199 | 0.95854739  | no |
| OR51F1    | -0.005351019 | -0.09617096  | 0.923444435 | 0.958592685 | no |
| INHA      | 0.005342552  | 0.096018788  | 0.923565196 | 0.958671736 | no |
| SCN10A    | -0.005336802 | -0.095915444 | 0.923647209 | 0.958710561 | no |

|           |              |              |             |             |    |
|-----------|--------------|--------------|-------------|-------------|----|
| ZNF665    | -0.005328433 | -0.09576502  | 0.923766586 | 0.958717539 | no |
| DGAT2L6   | 0.005327608  | 0.095750192  | 0.923778354 | 0.958717539 | no |
| TXNDC2    | 0.005326948  | 0.095738337  | 0.923787762 | 0.958717539 | no |
| HOXD4     | -0.005322309 | -0.095654962 | 0.923853929 | 0.95873991  | no |
| OR9I1     | 0.00531474   | 0.095518921  | 0.923961895 | 0.958805653 | no |
| OR10G2    | 0.005307769  | 0.095393642  | 0.92406132  | 0.958862528 | no |
| SLC45A3   | -0.005296203 | -0.095185759 | 0.924226306 | 0.958939998 | no |
| ADAMTS18  | -0.005296042 | -0.095182865 | 0.924228602 | 0.958939998 | no |
| MEGF10    | 0.00528917   | 0.095059356  | 0.924326626 | 0.958939998 | no |
| ZIK1      | 0.005289089  | 0.095057905  | 0.924327778 | 0.958939998 | no |
| FTH1P18   | 0.005286895  | 0.095018464  | 0.92435908  | 0.958939998 | no |
| TREML5P   | 0.005246682  | 0.094295716  | 0.92493272  | 0.959488782 | no |
| AAR2      | 0.005234327  | 0.094073656  | 0.925108975 | 0.95961623  | no |
| VPS16     | -0.00522917  | -0.093980975 | 0.92518254  | 0.95961623  | no |
| FERD3L    | -0.005226756 | -0.093937594 | 0.925216973 | 0.95961623  | no |
| NUDT5     | 0.00522555   | 0.093915909  | 0.925234186 | 0.95961623  | no |
| KRTAP19-8 | 0.005216533  | 0.09375386   | 0.925362813 | 0.959676139 | no |
| LOC388553 | -0.00521524  | -0.093730622 | 0.925381258 | 0.959676139 | no |
| TMEM82    | -0.005209469 | -0.093626894 | 0.925463594 | 0.959685264 | no |
| CRHR2     | 0.005208363  | 0.093607023  | 0.925479368 | 0.959685264 | no |
| UGGT2     | -0.005195775 | -0.093380768 | 0.925658964 | 0.95979732  | no |
| OCLN      | -0.005194528 | -0.09335836  | 0.925676751 | 0.95979732  | no |
| HAUS6     | 0.005184971  | 0.093186587  | 0.925813104 | 0.959857845 | no |
| OR1A1     | 0.005184175  | 0.093172292  | 0.925824451 | 0.959857845 | no |
| OR5B2     | 0.005180066  | 0.093098428  | 0.925883085 | 0.959872329 | no |
| GSKIP     | 0.00517425   | 0.092993903  | 0.925966058 | 0.959903945 | no |
| RAB3IP    | 0.005171667  | 0.092947476  | 0.926002913 | 0.959903945 | no |
| TEKT2     | -0.005144599 | -0.092460998 | 0.926389098 | 0.960244027 | no |
| GNPAT     | -0.005138748 | -0.092355827 | 0.926472589 | 0.960244027 | no |
| OR4D5     | -0.005135816 | -0.092303128 | 0.926514425 | 0.960244027 | no |
| EBLN2     | 0.005133068  | 0.092253743  | 0.92655363  | 0.960244027 | no |
| C2orf44   | 0.005133015  | 0.092252785  | 0.92655439  | 0.960244027 | no |
| CD01      | 0.005121977  | 0.09205441   | 0.926711876 | 0.960351105 | no |
| GOLGA6C   | 0.005114735  | 0.091924256  | 0.926815205 | 0.960351105 | no |
| XRR1      | -0.005113814 | -0.091907687 | 0.926828359 | 0.960351105 | no |
| PAGE3     | 0.005113246  | 0.091897487  | 0.926836456 | 0.960351105 | no |
| SYT12     | -0.005083374 | -0.091360602 | 0.927262698 | 0.96074644  | no |
| FLJ35424  | 0.005054378  | 0.090839448  | 0.927676471 | 0.961128817 | no |
| CENPK     | 0.005048495  | 0.090733716  | 0.92776042  | 0.961141729 | no |
| TMCC3     | -0.005046933 | -0.09070564  | 0.927782712 | 0.961141729 | no |
| C3orf79   | -0.005044102 | -0.090654768 | 0.927823104 | 0.961141729 | no |
| OR6B1     | -0.005022294 | -0.090262806 | 0.928134322 | 0.96129805  | no |
| LOC341056 | -0.005020545 | -0.090231377 | 0.928159277 | 0.96129805  | no |
| DEFB112   | 0.005020452  | 0.09022971   | 0.928160601 | 0.96129805  | no |
| NUP43     | -0.005020389 | -0.090228581 | 0.928161497 | 0.96129805  | no |
| NOP2      | 0.005017856  | 0.090183042  | 0.928197657 | 0.96129805  | no |
| TP53TG3D  | 0.004998113  | 0.08982822   | 0.928479397 | 0.961481932 | no |
| MEIOB     | -0.0049963   | -0.089795629 | 0.928505276 | 0.961481932 | no |
| CCDC96    | -0.00499601  | -0.089790407 | 0.928509423 | 0.961481932 | no |
| OR10A6    | 0.00498459   | 0.089585161  | 0.9286724   | 0.961593146 | no |
| OR8A1     | 0.004982214  | 0.089542455  | 0.928706311 | 0.961593146 | no |



|              |              |              |             |             |    |
|--------------|--------------|--------------|-------------|-------------|----|
| AFTPH        | 0.004978097  | 0.089468472  | 0.928765059 | 0.961607645 | no |
| LOC100506172 | -0.00496761  | -0.089279978 | 0.928914738 | 0.961716285 | no |
| DIO1         | -0.004938733 | -0.088760982 | 0.929326875 | 0.962071605 | no |
| KRTAP26-1    | -0.004935567 | -0.088704086 | 0.929372058 | 0.962071605 | no |
| ITIH6        | -0.004934153 | -0.088678674 | 0.929392238 | 0.962071605 | no |
| OR2V2        | -0.00492647  | -0.088540585 | 0.9295019   | 0.962138779 | no |
| MSANTD4      | -0.004921222 | -0.088446257 | 0.929576809 | 0.962169976 | no |
| CIB1         | 0.004900355  | 0.088071217  | 0.92987465  | 0.962431907 | no |
| TYR03P       | -0.004893869 | -0.087954657 | 0.92996722  | 0.962481364 | no |
| ZACN         | -0.00488962  | -0.087878282 | 0.930027875 | 0.962497788 | no |
| SIKE1        | -0.004871169 | -0.087546664 | 0.930291245 | 0.962699058 | no |
| OR6X1        | -0.004867083 | -0.087473232 | 0.930349566 | 0.962699058 | no |
| ITIH5        | -0.004864772 | -0.087431688 | 0.93038256  | 0.962699058 | no |
| USP17L15     | -0.004858979 | -0.087327571 | 0.930465252 | 0.962699058 | no |
| OR10J5       | 0.004857499  | 0.087300976  | 0.930486375 | 0.962699058 | no |
| TMEM174      | 0.004854535  | 0.087247699  | 0.930528688 | 0.962699058 | no |
| KRTAP13-3    | -0.004854028 | -0.08723859  | 0.930535923 | 0.962699058 | no |
| LRRK2        | -0.004848383 | -0.087137129 | 0.930616508 | 0.962736082 | no |
| ARL14        | -0.00480364  | -0.086332975 | 0.931255218 | 0.96317115  | no |
| ROPN1        | 0.004802515  | 0.086312762  | 0.931271273 | 0.96317115  | no |
| VN1R5        | -0.004800026 | -0.086268027 | 0.931306806 | 0.96317115  | no |
| HSD17B3      | 0.004793096  | 0.08614347   | 0.931405742 | 0.96317115  | no |
| FABP12       | 0.004791017  | 0.086106115  | 0.931435414 | 0.96317115  | no |
| PLAC1L       | 0.004789499  | 0.086078822  | 0.931457093 | 0.96317115  | no |
| A1BG         | -0.004788781 | -0.086065928 | 0.931467334 | 0.96317115  | no |
| MT1G         | 0.004787881  | 0.086049752  | 0.931480183 | 0.96317115  | no |
| MAPK15       | 0.004786519  | 0.086025271  | 0.931499628 | 0.96317115  | no |
| MYH4         | 0.004786353  | 0.086022283  | 0.931502002 | 0.96317115  | no |
| HCRTR2       | -0.004784388 | -0.08598697  | 0.931530052 | 0.96317115  | no |
| TTK          | -0.004777584 | -0.085864678 | 0.93162719  | 0.963223494 | no |
| GLYATL1      | 0.00476951   | 0.085719566  | 0.931742458 | 0.963223494 | no |
| UBE3A        | 0.004769476  | 0.085718949  | 0.931742948 | 0.963223494 | no |
| KDM4E        | -0.004766275 | -0.08566142  | 0.931788645 | 0.963223494 | no |
| GALNTL4      | 0.004765145  | 0.085641112  | 0.931804776 | 0.963223494 | no |
| OR2D2        | 0.004741163  | 0.085210085  | 0.932147164 | 0.963531081 | no |
| OR10G8       | -0.004729873 | -0.085007175 | 0.932308351 | 0.963651346 | no |
| GPR111       | 0.004718953  | 0.08481091   | 0.932464262 | 0.963720932 | no |
| DEFB125      | 0.004716066  | 0.084759024  | 0.93250548  | 0.963720932 | no |
| COMP         | 0.004715735  | 0.084753079  | 0.932510203 | 0.963720932 | no |
| SUPT6H       | -0.004711951 | -0.084685061 | 0.932564237 | 0.963730429 | no |
| C4orf51      | 0.004695599  | 0.084391171  | 0.932797708 | 0.963925352 | no |
| LRR1         | 0.004684447  | 0.084190742  | 0.932956934 | 0.964043537 | no |
| PYY          | -0.004674996 | -0.084020881 | 0.93309188  | 0.964107174 | no |
| LOC286297    | -0.004673388 | -0.08399199  | 0.933114832 | 0.964107174 | no |
| FAM175B      | -0.004670708 | -0.083943818 | 0.933153102 | 0.964107174 | no |
| C2orf47      | -0.00466008  | -0.083752806 | 0.933304854 | 0.964175203 | no |
| CARKD        | -0.004659813 | -0.083747995 | 0.933308676 | 0.964175203 | no |
| ENTPD2       | -0.004643752 | -0.083459337 | 0.933538009 | 0.964365763 | no |
| ZNF460       | 0.00463628   | 0.083325051  | 0.933644697 | 0.964429617 | no |
| CACNA1C-AS1  | 0.004630086  | 0.083213728  | 0.933733143 | 0.964474622 | no |
| CILP2        | -0.004603135 | -0.082729343 | 0.934117997 | 0.964719831 | no |

|             |              |              |             |             |    |
|-------------|--------------|--------------|-------------|-------------|----|
| APOE        | 0.00460172   | 0.082703905  | 0.934138208 | 0.964719831 | no |
| GTF2E1      | -0.004601552 | -0.082700889 | 0.934140604 | 0.964719831 | no |
| MYL4        | 0.004599557  | 0.082665029  | 0.934169097 | 0.964719831 | no |
| ZNHIT1      | 0.004597744  | 0.082632448  | 0.934194984 | 0.964719831 | no |
| PAGE4       | -0.004590866 | -0.082508837 | 0.934293198 | 0.964774895 | no |
| FLJ39051    | 0.004575247  | 0.082228126  | 0.934516239 | 0.964895558 | no |
| ASB10       | -0.004571273 | -0.082156701 | 0.934572992 | 0.964895558 | no |
| GDA         | 0.004569292  | 0.082121084  | 0.934601292 | 0.964895558 | no |
| C20orf144   | -0.004565224 | -0.082047972 | 0.934659385 | 0.964895558 | no |
| SNHG15      | -0.004564955 | -0.082043144 | 0.934663221 | 0.964895558 | no |
| LOC348761   | 0.004560802  | 0.08196851   | 0.934722524 | 0.964895558 | no |
| LOC401557   | 0.004560676  | 0.081966235  | 0.934724332 | 0.964895558 | no |
| SPESP1      | -0.004553068 | -0.081829498 | 0.934832982 | 0.964952477 | no |
| GATAD2A     | 0.004550527  | 0.081783826  | 0.934869272 | 0.964952477 | no |
| SNORA13     | -0.00454562  | -0.081695643 | 0.934939343 | 0.964978456 | no |
| ARX         | -0.004533496 | -0.081477743 | 0.935112488 | 0.965110814 | no |
| TTC27       | -0.004526052 | -0.081343951 | 0.935218803 | 0.965174188 | no |
| C1orf185    | -0.004518975 | -0.081216753 | 0.935319878 | 0.965232148 | no |
| FSIP2       | 0.004512355  | 0.081097775  | 0.935414422 | 0.965261034 | no |
| CNTN4-AS2   | 0.004510725  | 0.081068484  | 0.935437698 | 0.965261034 | no |
| OR6C76      | -0.004490449 | -0.080704071 | 0.935727281 | 0.965485981 | no |
| DCSTAMP     | -0.004489171 | -0.080681088 | 0.935745545 | 0.965485981 | no |
| HIST1H2AL   | 0.004483976  | 0.080587721  | 0.93581974  | 0.965516181 | no |
| TAS2R39     | -0.004475633 | -0.080437787 | 0.93593889  | 0.965592755 | no |
| MATN4       | -0.004460492 | -0.080165651 | 0.936155155 | 0.96576951  | no |
| OR4A15      | 0.004449669  | 0.079971141  | 0.936309733 | 0.965844501 | no |
| PIGU        | -0.004449109 | -0.079961079 | 0.93631773  | 0.965844501 | no |
| CERCAM      | 0.004442325  | 0.079839144  | 0.936414633 | 0.965872323 | no |
| RPA4        | -0.004437531 | -0.079752992 | 0.936483101 | 0.965872323 | no |
| ANAPC1      | -0.004435569 | -0.079717724 | 0.936511129 | 0.965872323 | no |
| OR5P2       | 0.004434635  | 0.079700933  | 0.936524474 | 0.965872323 | no |
| PPP1R8      | 0.004428098  | 0.079583445  | 0.936617845 | 0.965883927 | no |
| FGF6        | -0.004426481 | -0.07955438  | 0.936640945 | 0.965883927 | no |
| OR10X1      | -0.004424408 | -0.079517121 | 0.936670556 | 0.965883927 | no |
| ESRP1       | -0.004412608 | -0.079305051 | 0.936839098 | 0.966011374 | no |
| MYOZ2       | -0.004409123 | -0.079242408 | 0.936888884 | 0.966016361 | no |
| SCN1B       | 0.004403116  | 0.079134458  | 0.936974679 | 0.966058474 | no |
| MROH9       | 0.004399588  | 0.079071039  | 0.937025083 | 0.966064095 | no |
| ATXN1L      | -0.00439317  | -0.078955699 | 0.937116752 | 0.966086659 | no |
| DBX1        | 0.004391761  | 0.07893038   | 0.937136875 | 0.966086659 | no |
| DSCR6       | 0.004388338  | 0.07886885   | 0.937185778 | 0.966090731 | no |
| CHST12      | -0.004377445 | -0.078673066 | 0.937341385 | 0.966204792 | no |
| GUCA2A      | -0.004369871 | -0.078536948 | 0.937449572 | 0.966269964 | no |
| CHEK2       | -0.004360229 | -0.078363649 | 0.937587312 | 0.966348087 | no |
| SGOL2       | -0.004356508 | -0.078296783 | 0.937640458 | 0.966348087 | no |
| ACSM4       | 0.004355122  | 0.078271869  | 0.93766026  | 0.966348087 | no |
| DHX40       | -0.004344655 | -0.078083746 | 0.937809785 | 0.966441532 | no |
| GYLTL1B     | 0.004342479  | 0.078044637  | 0.93784087  | 0.966441532 | no |
| FOXD1       | 0.0043328    | 0.077870678  | 0.93797914  | 0.966537672 | no |
| ACCSL       | -0.004320367 | -0.077647229 | 0.93815675  | 0.96667434  | no |
| COMMD3-BMI1 | -0.004268795 | -0.076720342 | 0.938893521 | 0.967383332 | no |

|              |              |              |             |             |    |
|--------------|--------------|--------------|-------------|-------------|----|
| GSDMC        | -0.004265008 | -0.076652274 | 0.93894763  | 0.967383332 | no |
| COL6A4P2     | 0.004262751  | 0.076611722  | 0.938979866 | 0.967383332 | no |
| TM9SF4       | 0.004248768  | 0.076360398  | 0.939179651 | 0.967542777 | no |
| FLJ12334     | -0.00424537  | -0.076299321 | 0.939228203 | 0.967546416 | no |
| ILF3         | -0.00423063  | -0.076034419 | 0.939438788 | 0.967716962 | no |
| ACAD10       | -0.004217577 | -0.075799815 | 0.93962529  | 0.967784244 | no |
| DPCD         | 0.004216214  | 0.075775325  | 0.939644758 | 0.967784244 | no |
| HOXB13       | -0.004216103 | -0.075773328 | 0.939646346 | 0.967784244 | no |
| FLJ42289     | -0.004213452 | -0.075725672 | 0.939684232 | 0.967784244 | no |
| ADAMTS5      | 0.004207916  | 0.075626173  | 0.939763331 | 0.967819329 | no |
| FOXD4L3      | -0.004190382 | -0.075311046 | 0.940013855 | 0.968030943 | no |
| LOC339240    | -0.004181754 | -0.075155985 | 0.94013713  | 0.968035868 | no |
| MMP27        | 0.004181591  | 0.075153043  | 0.940139469 | 0.968035868 | no |
| TBC1D3F      | -0.00418059  | -0.075135056 | 0.940153768 | 0.968035868 | no |
| FGFR2        | 0.004173185  | 0.07500198   | 0.940259566 | 0.968081219 | no |
| SNORA56      | 0.004171202  | 0.074966335  | 0.940287905 | 0.968081219 | no |
| EFCAB9       | -0.004162495 | -0.074809841 | 0.940412322 | 0.968162932 | no |
| LINS         | 0.004155842  | 0.074690279  | 0.940507378 | 0.968214412 | no |
| ZNF628       | 0.004128419  | 0.074197401  | 0.940899242 | 0.968529306 | no |
| PRB4         | 0.004128128  | 0.074192179  | 0.940903395 | 0.968529306 | no |
| ZSCAN10      | -0.004121969 | -0.074081481 | 0.940991408 | 0.968533059 | no |
| PADI4        | 0.004116018  | 0.073974519  | 0.94107645  | 0.968533059 | no |
| OR1Q1        | 0.004115569  | 0.073966463  | 0.941082856 | 0.968533059 | no |
| SYDE2        | 0.004115258  | 0.073960864  | 0.941087308 | 0.968533059 | no |
| AGRP         | -0.004108887 | -0.073846362 | 0.941178346 | 0.968580369 | no |
| CENPF        | 0.004079381  | 0.073316073  | 0.941599982 | 0.968959203 | no |
| SLC39A12     | 0.00407511   | 0.073239309  | 0.941661019 | 0.968959203 | no |
| RPL13AP5     | 0.00407169   | 0.073177835  | 0.941709899 | 0.968959203 | no |
| LINC00051    | 0.004070506  | 0.073156566  | 0.94172681  | 0.968959203 | no |
| NHLRC1       | 0.004064139  | 0.073042122  | 0.941817808 | 0.96900644  | no |
| S100PBP      | -0.004052831 | -0.072838887 | 0.94197941  | 0.969121396 | no |
| TMEM33       | -0.00405001  | -0.072788182 | 0.942019727 | 0.969121396 | no |
| KAAG1        | -0.004039176 | -0.072593468 | 0.942174555 | 0.969211052 | no |
| HIST1H3A     | -0.004036903 | -0.072552628 | 0.94220703  | 0.969211052 | no |
| OR52W1       | -0.004033758 | -0.072496107 | 0.942251974 | 0.969211052 | no |
| KIAA1984-AS1 | -0.004031289 | -0.072451719 | 0.94228727  | 0.969211052 | no |
| LOC100653515 | 0.00402505   | 0.072339595  | 0.942376428 | 0.969256368 | no |
| CHAMP1       | 0.004014919  | 0.072157507  | 0.942521221 | 0.969313968 | no |
| EN1          | 0.00401482   | 0.072155727  | 0.942522637 | 0.969313968 | no |
| PRSS2        | -0.004006144 | -0.0719998   | 0.942646628 | 0.969382475 | no |
| KRT3         | -0.004003846 | -0.071958509 | 0.942679463 | 0.969382475 | no |
| NUP107       | -0.003986469 | -0.071646187 | 0.942927824 | 0.969591477 | no |
| RUSC1        | 0.003976016  | 0.071458331  | 0.943077212 | 0.969698692 | no |
| SDE2         | -0.003971615 | -0.071379216 | 0.943140126 | 0.969716986 | no |
| LRFN3        | 0.003964115  | 0.071244429  | 0.943247313 | 0.969780797 | no |
| TPX2         | 0.003958852  | 0.071149844  | 0.943322532 | 0.969811736 | no |
| RHBDL2       | -0.003946942 | -0.070935783 | 0.943492764 | 0.969940348 | no |
| SNORA71C     | 0.003928204  | 0.070599015  | 0.943760585 | 0.970126926 | no |
| OR9G1        | -0.003927928 | -0.070594046 | 0.943764536 | 0.970126926 | no |
| OR4P4        | -0.003913876 | -0.070341501 | 0.943965381 | 0.970286972 | no |
| OR51B2       | 0.003894446  | 0.069992289  | 0.94424311  | 0.970526026 | no |

|              |              |              |             |             |    |
|--------------|--------------|--------------|-------------|-------------|----|
| FTSJD2       | -0.003881884 | -0.069766516 | 0.944422671 | 0.970619685 | no |
| OR52B6       | -0.003881751 | -0.06976414  | 0.944424561 | 0.970619685 | no |
| KDM6A        | -0.003876678 | -0.069672952 | 0.944497085 | 0.970632438 | no |
| CSHL1        | 0.003874003  | 0.069624879  | 0.944535319 | 0.970632438 | no |
| IKZF4        | -0.003871404 | -0.069578176 | 0.944572463 | 0.970632438 | no |
| CCDC57       | 0.00386785   | 0.069514295  | 0.94462327  | 0.970638235 | no |
| MRT04        | 0.003860548  | 0.06938306   | 0.944727647 | 0.970665084 | no |
| RRP12        | -0.003859703 | -0.069367866 | 0.944739731 | 0.970665084 | no |
| DCAF4L2      | -0.003849425 | -0.069183152 | 0.944886644 | 0.970769618 | no |
| SHROOM4      | -0.003836457 | -0.068950091 | 0.945072012 | 0.970913648 | no |
| WNK4         | 0.003829363  | 0.068822577  | 0.945173432 | 0.970971426 | no |
| MEOX1        | -0.003825125 | -0.068746417 | 0.945234008 | 0.970976411 | no |
| MBD6         | -0.003820635 | -0.068665729 | 0.945298187 | 0.970976411 | no |
| CACNA1A      | -0.003817635 | -0.068611799 | 0.945341082 | 0.970976411 | no |
| NPPB         | 0.003816381  | 0.068589261  | 0.945359007 | 0.970976411 | no |
| RDX          | 0.003806154  | 0.068405458  | 0.945505204 | 0.971080159 | no |
| LOC100129083 | -0.003802258 | -0.06833543  | 0.945560904 | 0.971090958 | no |
| LOC729678    | -0.003795823 | -0.068219792 | 0.945652883 | 0.971139012 | no |
| MSGN1        | -0.003781146 | -0.067956008 | 0.9458627   | 0.97130807  | no |
| MAPKAPK5     | 0.003766683  | 0.067696071  | 0.946069462 | 0.971473974 | no |
| ZNF575       | 0.003757831  | 0.067536966  | 0.946196021 | 0.971520569 | no |
| HSD17B14     | 0.003757185  | 0.067525364  | 0.94620525  | 0.971520569 | no |
| HPGD         | 0.003752321  | 0.067437937  | 0.946274793 | 0.971545556 | no |
| WDR90        | -0.003730033 | -0.067037376 | 0.946593425 | 0.971826269 | no |
| PAX9         | -0.003726496 | -0.066973792 | 0.946644004 | 0.971831771 | no |
| IFNA21       | -0.003705848 | -0.066602704 | 0.946939199 | 0.972088384 | no |
| DDAH2        | 0.003693762  | 0.066385489  | 0.947111994 | 0.972216696 | no |
| OPN5         | -0.003690777 | -0.066331845 | 0.947154668 | 0.972216696 | no |
| GJA9-MYCBP   | -0.003675459 | -0.066056534 | 0.947373682 | 0.972395062 | no |
| LCE1D        | 0.003662308  | 0.065820175  | 0.947561713 | 0.97248786  | no |
| OR2F1        | 0.00365824   | 0.06574706   | 0.947619879 | 0.97248786  | no |
| COX7B2       | 0.003657512  | 0.06573398   | 0.947630285 | 0.97248786  | no |
| LOC644649    | -0.003655897 | -0.06570496  | 0.947653372 | 0.97248786  | no |
| FAM211A      | 0.003645078  | 0.065510509  | 0.947808066 | 0.97248786  | no |
| FAM84A       | -0.003643254 | -0.065477723 | 0.947834149 | 0.97248786  | no |
| GPR151       | -0.003630963 | -0.065256823 | 0.948009889 | 0.97248786  | no |
| SERPINA10    | 0.003630626  | 0.065250778  | 0.948014698 | 0.97248786  | no |
| PCYOX1L      | -0.003630006 | -0.06523962  | 0.948023575 | 0.97248786  | no |
| TYRP1        | 0.003627176  | 0.065188757  | 0.94806404  | 0.97248786  | no |
| TMPRSS11D    | -0.003626428 | -0.065175322 | 0.948074728 | 0.97248786  | no |
| ABCC5-AS1    | 0.003626145  | 0.065170236  | 0.948078774 | 0.97248786  | no |
| PPIL1        | -0.003625988 | -0.065167419 | 0.948081016 | 0.97248786  | no |
| OR13C8       | -0.003621039 | -0.065078463 | 0.948151787 | 0.97248786  | no |
| CDH2         | 0.003619184  | 0.065045123  | 0.948178312 | 0.97248786  | no |
| GAL          | -0.003618048 | -0.06502471  | 0.948194552 | 0.97248786  | no |
| ALDH1L1-AS2  | -0.003612176 | -0.064919182 | 0.948278508 | 0.97248786  | no |
| LINC00544    | 0.003612169  | 0.064919054  | 0.948278609 | 0.97248786  | no |
| CALCA        | -0.003608672 | -0.064856198 | 0.948328617 | 0.972492738 | no |
| OR6K2        | -0.003602663 | -0.064748204 | 0.948414536 | 0.972507438 | no |
| PAPLN        | 0.003597402  | 0.064653649  | 0.948489764 | 0.972507438 | no |
| TROVE2       | 0.00358973   | 0.064515765  | 0.948599464 | 0.972507438 | no |

|              |              |              |             |             |    |
|--------------|--------------|--------------|-------------|-------------|----|
| TBC1D3P5     | 0.003589433  | 0.064510421  | 0.948603716 | 0.972507438 | no |
| CLDN10       | 0.003582632  | 0.064388202  | 0.948700954 | 0.972507438 | no |
| VSIG2        | -0.003582448 | -0.06438489  | 0.948703589 | 0.972507438 | no |
| MND1         | -0.003576994 | -0.064286874 | 0.948781572 | 0.972507438 | no |
| OTUD7B       | 0.003576406  | 0.064276289  | 0.948789994 | 0.972507438 | no |
| LOC100505478 | -0.003575619 | -0.064262146 | 0.948801246 | 0.972507438 | no |
| HOXA10-HOXA9 | -0.003574    | -0.064233047 | 0.948824398 | 0.972507438 | no |
| KLHL29       | 0.003572858  | 0.064212529  | 0.948840722 | 0.972507438 | no |
| SCARNA23     | 0.003560933  | 0.063998201  | 0.949011247 | 0.97263583  | no |
| OR9Q1        | -0.003552922 | -0.063854229 | 0.949125797 | 0.972706843 | no |
| STEAP2       | 0.003542758  | 0.06367156   | 0.949271135 | 0.972809402 | no |
| MAT1A        | -0.003533539 | -0.063505867 | 0.94940297  | 0.972824608 | no |
| SERPINA7     | 0.003532873  | 0.063493903  | 0.949412489 | 0.972824608 | no |
| URB2         | -0.003528575 | -0.063416645 | 0.94947396  | 0.972824608 | no |
| TOP3A        | 0.003528296  | 0.063411632  | 0.949477949 | 0.972824608 | no |
| BARX1        | -0.003524389 | -0.06334142  | 0.949533814 | 0.972824608 | no |
| C10orf68     | -0.003522728 | -0.063311559 | 0.949557573 | 0.972824608 | no |
| OR2G3        | -0.003517768 | -0.063222424 | 0.949628495 | 0.972850891 | no |
| FLJ42969     | -0.003502612 | -0.062950029 | 0.949845233 | 0.973026546 | no |
| MAPK1IP1L    | -0.003498367 | -0.06287374  | 0.949905936 | 0.973042348 | no |
| SPDYE8P      | -0.003491204 | -0.062745006 | 0.950008368 | 0.973072409 | no |
| RPL39        | 0.003489983  | 0.06272305   | 0.950025838 | 0.973072409 | no |
| VPS33A       | -0.003460598 | -0.062194939 | 0.950446061 | 0.973443718 | no |
| ZNF699       | -0.003458299 | -0.062153615 | 0.950478943 | 0.973443718 | no |
| TRAPPC2P1    | 0.003452886  | 0.062056334  | 0.950556353 | 0.973476606 | no |
| DGAT2        | 0.003440109  | 0.061826697  | 0.950739082 | 0.973617346 | no |
| LOC100130880 | 0.00343558   | 0.061745295  | 0.950803857 | 0.973637285 | no |
| PRSS42       | 0.00342587   | 0.061570784  | 0.950942724 | 0.97373309  | no |
| LFNG         | 0.003418919  | 0.061445859  | 0.951042134 | 0.973788485 | no |
| MYH16        | 0.003407194  | 0.061235133  | 0.951209822 | 0.973913783 | no |
| DEFB126      | -0.003402047 | -0.061142629 | 0.951283434 | 0.973942751 | no |
| NOS2         | 0.003393121  | 0.0609822    | 0.951411101 | 0.974027056 | no |
| C1orf177     | 0.003383997  | 0.060818217  | 0.951541595 | 0.974053636 | no |
| SPG20        | 0.003383516  | 0.060809586  | 0.951548464 | 0.974053636 | no |
| LOC440925    | 0.003381799  | 0.06077871   | 0.951573035 | 0.974053636 | no |
| MTOR         | -0.003377265 | -0.06069723  | 0.951637876 | 0.974073614 | no |
| PAK1         | 0.003343108  | 0.060083348  | 0.95212641  | 0.9745192   | no |
| GUCY2D       | 0.003340488  | 0.060036252  | 0.95216389  | 0.9745192   | no |
| CHAC1        | 0.003334626  | 0.059930895  | 0.952247736 | 0.974558603 | no |
| TIAM2        | 0.003325656  | 0.059769688  | 0.952376031 | 0.974643489 | no |
| SNORA2B      | -0.003304445 | -0.059388465 | 0.952679427 | 0.974907555 | no |
| OR5AP2       | 0.003298766  | 0.059286416  | 0.952760643 | 0.974944242 | no |
| CLSPN        | 0.003285949  | 0.059056045  | 0.952943988 | 0.975085428 | no |
| OR6C1        | 0.003275309  | 0.058864826  | 0.953096175 | 0.975171215 | no |
| FAM173A      | -0.003272661 | -0.058817239 | 0.953134049 | 0.975171215 | no |
| SEPT7P2      | -0.003270571 | -0.058779664 | 0.953163954 | 0.975171215 | no |
| NPHP4        | 0.003258429  | 0.058561447  | 0.953337632 | 0.975271742 | no |
| ANKRD33      | -0.003256344 | -0.058523984 | 0.953367448 | 0.975271742 | no |
| OR52D1       | -0.003253254 | -0.058468452 | 0.953411646 | 0.975271742 | no |
| KANSL1L      | -0.003251011 | -0.058428135 | 0.953443735 | 0.975271742 | no |
| XIRP2        | -0.00324756  | -0.058366105 | 0.953493105 | 0.975275823 | no |

|              |              |              |             |             |    |
|--------------|--------------|--------------|-------------|-------------|----|
| PPAPDC1B     | 0.003240183  | 0.058233525  | 0.953598626 | 0.975337335 | no |
| FGF10        | -0.003230424 | -0.058058123 | 0.953738232 | 0.9754337   | no |
| DCDC2        | 0.0032162    | 0.057802499  | 0.953941689 | 0.975595358 | no |
| RNF186       | -0.003207232 | -0.057641308 | 0.954069987 | 0.97566711  | no |
| LINC00473    | -0.003202793 | -0.05756153  | 0.954133486 | 0.97566711  | no |
| PSMG2        | 0.003201775  | 0.057543238  | 0.954148045 | 0.97566711  | no |
| TRIP13       | -0.003197582 | -0.057467882 | 0.954208025 | 0.975677387 | no |
| C17orf70     | 0.003194725  | 0.057416535  | 0.954248894 | 0.975677387 | no |
| ZNF562       | -0.003181427 | -0.057177541 | 0.954439123 | 0.975825461 | no |
| DUX4L        | 0.003174246  | 0.057048481  | 0.95454185  | 0.975884064 | no |
| OR6C75       | 0.003168537  | 0.056945868  | 0.954623527 | 0.97592114  | no |
| PDRG1        | 0.003158072  | 0.056757795  | 0.954773228 | 0.976027753 | no |
| TPGS1        | 0.00315332   | 0.056672379  | 0.954841218 | 0.976050828 | no |
| LOC613038    | -0.003149966 | -0.056612106 | 0.954889194 | 0.976053445 | no |
| HSPA12B      | -0.003129768 | -0.056249099 | 0.955178146 | 0.976300795 | no |
| PKP1         | -0.0031267   | -0.056193958 | 0.955222038 | 0.976300795 | no |
| LEO1         | 0.00312147   | 0.056099952  | 0.955296868 | 0.976330844 | no |
| ZNF551       | -0.003117255 | -0.056024203 | 0.955357165 | 0.976346038 | no |
| SCOC         | 0.003109714  | 0.055888673  | 0.955465049 | 0.976409861 | no |
| FAM83F       | -0.003104653 | -0.055797714 | 0.955537454 | 0.976437422 | no |
| MRPL9        | 0.003098842  | 0.05569327   | 0.955620594 | 0.976449854 | no |
| C2orf16      | 0.003094615  | 0.055617309  | 0.955681062 | 0.976449854 | no |
| CUZD1        | -0.003088951 | -0.055515517 | 0.955762092 | 0.976449854 | no |
| PIH1D3       | 0.003088759  | 0.055512069  | 0.955764836 | 0.976449854 | no |
| SLC4A8       | 0.003087923  | 0.055497044  | 0.955776796 | 0.976449854 | no |
| SPANXN1      | -0.003081694 | -0.055385089 | 0.955865917 | 0.976449945 | no |
| LOC100169752 | -0.003078429 | -0.055326398 | 0.955912638 | 0.976449945 | no |
| CYP2C18      | 0.00307839   | 0.055325703  | 0.955913191 | 0.976449945 | no |
| TRIP11       | -0.003068806 | -0.055153466 | 0.9560503   | 0.976518404 | no |
| EIF2AK1      | -0.003067354 | -0.055127354 | 0.956071087 | 0.976518404 | no |
| C1QTNF2      | -0.003057357 | -0.054947686 | 0.956214113 | 0.976618073 | no |
| UGT1A6       | 0.003033093  | 0.054511603  | 0.956561265 | 0.976910673 | no |
| OR1J1        | 0.003030815  | 0.054470669  | 0.956593852 | 0.976910673 | no |
| CENPN        | 0.003027802  | 0.054416507  | 0.956636969 | 0.976910673 | no |
| TNNI2        | -0.00302249  | -0.054321052 | 0.95671296  | 0.976941852 | no |
| RAB11B-AS1   | -0.003012792 | -0.054146743 | 0.956851726 | 0.977037129 | no |
| C21orf67     | 0.003003254  | 0.053975327  | 0.95698819  | 0.977090958 | no |
| ETNK1        | 0.003002752  | 0.053966304  | 0.956995374 | 0.977090958 | no |
| BSDC1        | 0.002998995  | 0.053898784  | 0.957049126 | 0.977099419 | no |
| SCGB2B3P     | -0.002982067 | -0.05359454  | 0.957291339 | 0.977300278 | no |
| SRSF11       | -0.002975128 | -0.053469842 | 0.957390614 | 0.97731024  | no |
| UHRF2        | 0.002973306  | 0.053437083  | 0.957416694 | 0.97731024  | no |
| LOC100288778 | -0.002968346 | -0.053347944 | 0.95748766  | 0.97731024  | no |
| SNX19        | 0.002966725  | 0.053318818  | 0.957510848 | 0.97731024  | no |
| IARS         | 0.002965494  | 0.05329668   | 0.957528473 | 0.97731024  | no |
| HIST1H1T     | 0.002962116  | 0.05323598   | 0.957576798 | 0.977313149 | no |
| UCP1         | 0.002955238  | 0.053112368  | 0.957675211 | 0.977367174 | no |
| DYDC2        | -0.002949563 | -0.053010371 | 0.957756415 | 0.977403633 | no |
| CALB2        | 0.002942077  | 0.052875824  | 0.957863534 | 0.97741124  | no |
| OR5AR1       | -0.002940288 | -0.052843681 | 0.957889125 | 0.97741124  | no |
| OR4D1        | 0.002939507  | 0.052829633  | 0.957900308 | 0.97741124  | no |

|              |              |              |             |             |    |
|--------------|--------------|--------------|-------------|-------------|----|
| PRCC         | -0.002924512 | -0.052560143 | 0.958114866 | 0.977583752 | no |
| EP400NL      | 0.002918252  | 0.052447628  | 0.958204446 | 0.977628738 | no |
| LINC00494    | -0.002900334 | -0.052125604 | 0.958460833 | 0.977843901 | no |
| LOC100132146 | -0.002894915 | -0.052028211 | 0.958538376 | 0.977876589 | no |
| LIM2         | 0.00288891   | 0.051920282  | 0.958624308 | 0.977917834 | no |
| BRK1         | -0.002885295 | -0.051855325 | 0.958676026 | 0.977924173 | no |
| SLC25A10     | 0.002866389  | 0.051515533  | 0.958946569 | 0.978153719 | no |
| FLJ39080     | 0.002856395  | 0.051335907  | 0.959089589 | 0.978253173 | no |
| TRPM3        | 0.002845912  | 0.05114751   | 0.959239593 | 0.978321107 | no |
| NHLRC3       | 0.002845378  | 0.051137911  | 0.959247237 | 0.978321107 | no |
| BTNL3        | -0.002830385 | -0.050868453 | 0.959461786 | 0.978493487 | no |
| MGC16121     | 0.002813006  | 0.050556117  | 0.959710481 | 0.978700671 | no |
| DDX39A       | 0.002790846  | 0.05015784   | 0.96002761  | 0.978977622 | no |
| LIPM         | 0.002762851  | 0.049654704  | 0.960428243 | 0.979308378 | no |
| MTFR2        | -0.002761813 | -0.049636045 | 0.960443101 | 0.979308378 | no |
| ZBTB2        | -0.002745109 | -0.049335831 | 0.960682158 | 0.979505658 | no |
| C9orf106     | 0.002735205  | 0.04915783   | 0.9608239   | 0.979603702 | no |
| KLK3         | 0.002711804  | 0.048737261  | 0.961158803 | 0.979838831 | no |
| RPTN         | -0.00271152  | -0.048732162 | 0.961162864 | 0.979838831 | no |
| IL20         | 0.002703898  | 0.048595184  | 0.961271942 | 0.979838831 | no |
| ABO          | -0.002702831 | -0.04857599  | 0.961287227 | 0.979838831 | no |
| P2RY11       | -0.002700239 | -0.04852941  | 0.96132432  | 0.979838831 | no |
| TINF2        | -0.002699976 | -0.048524688 | 0.961328079 | 0.979838831 | no |
| CEP135       | -0.002693631 | -0.048410649 | 0.961418892 | 0.979876162 | no |
| CREBRF       | 0.002691045  | 0.048364183  | 0.961455895 | 0.979876162 | no |
| RPL13AP20    | 0.002675801  | 0.04809021   | 0.96167407  | 0.980052041 | no |
| E2F8         | 0.002667094  | 0.047933713  | 0.961798696 | 0.98013257  | no |
| FLJ14186     | 0.002663764  | 0.047873873  | 0.961846349 | 0.980134656 | no |
| FASTKD2      | 0.002655404  | 0.047723624  | 0.961966001 | 0.980165691 | no |
| LURAP1       | -0.002651272 | -0.047649365 | 0.962025137 | 0.980165691 | no |
| OR51F2       | 0.002649492  | 0.047617372  | 0.962050615 | 0.980165691 | no |
| YME1L1       | 0.002648594  | 0.047601222  | 0.962063476 | 0.980165691 | no |
| SLC26A8      | 0.002640849  | 0.047462034  | 0.962174321 | 0.980165691 | no |
| LRRD1        | -0.002639792 | -0.047443041 | 0.962189446 | 0.980165691 | no |
| SLC30A2      | -0.00263933  | -0.047434732 | 0.962196063 | 0.980165691 | no |
| MIR5191      | -0.002627849 | -0.047228389 | 0.962360389 | 0.980277903 | no |
| SORCS1       | 0.00262526   | 0.047181859  | 0.962397445 | 0.980277903 | no |
| RAB8B        | 0.002620312  | 0.047092929  | 0.962468267 | 0.980303579 | no |
| ZNF354A      | -0.00260902  | -0.046889996 | 0.962629879 | 0.980415461 | no |
| OR6Y1        | 0.002606262  | 0.046840431  | 0.962669353 | 0.980415461 | no |
| LDLRAD4      | 0.002599962  | 0.046727194  | 0.962759533 | 0.980460841 | no |
| LOC285627    | -0.00259556  | -0.046648082 | 0.962822538 | 0.980478543 | no |
| OR10J1       | 0.002587137  | 0.046496708  | 0.962943092 | 0.980554844 | no |
| MYOC         | 0.002578131  | 0.04633485   | 0.963071996 | 0.980639642 | no |
| FOXF1        | -0.002564628 | -0.046092168 | 0.963265272 | 0.980760151 | no |
| RPS19        | -0.002563486 | -0.046071643 | 0.963281618 | 0.980760151 | no |
| HSPA14       | 0.002547639  | 0.045786836  | 0.963508445 | 0.980880174 | no |
| LOC100500773 | 0.002546162  | 0.045760289  | 0.963529589 | 0.980880174 | no |
| POU6F2       | -0.002544695 | -0.045733915 | 0.963550593 | 0.980880174 | no |
| NLRP9        | -0.002542496 | -0.045694396 | 0.963582068 | 0.980880174 | no |
| LOC100130849 | -0.002529568 | -0.045462048 | 0.963767119 | 0.981003424 | no |

|              |              |              |             |             |    |
|--------------|--------------|--------------|-------------|-------------|----|
| PABPC1       | 0.002527659  | 0.045427744  | 0.963794439 | 0.981003424 | no |
| FAM217A      | -0.002503657 | -0.044996363 | 0.964138013 | 0.98126988  | no |
| KRT8P41      | -0.002502991 | -0.044984402 | 0.96414754  | 0.98126988  | no |
| HYPK         | -0.002497982 | -0.04489437  | 0.964219246 | 0.981296388 | no |
| C19orf44     | 0.002493164  | 0.044807777  | 0.964288215 | 0.981320107 | no |
| DCP2         | 0.002477363  | 0.044523807  | 0.964514388 | 0.981503799 | no |
| CCDC15       | -0.002439816 | -0.04384899  | 0.965051871 | 0.98200425  | no |
| IFLTD1       | -0.002431233 | -0.043694743 | 0.965174729 | 0.982082766 | no |
| OR52E2       | 0.002422633  | 0.04354018   | 0.965297839 | 0.982161531 | no |
| KIF2C        | -0.002417066 | -0.043440118 | 0.96537754  | 0.98218903  | no |
| UGT1A4       | 0.002412729  | 0.043362179  | 0.965439619 | 0.98218903  | no |
| WISP3        | -0.002405299 | -0.043228643 | 0.965545983 | 0.98218903  | no |
| FCN2         | -0.00239934  | -0.043121549 | 0.965631286 | 0.98218903  | no |
| CYHR1        | -0.002398689 | -0.043109842 | 0.965640611 | 0.98218903  | no |
| TMPRSS15     | -0.002398347 | -0.043103699 | 0.965645504 | 0.98218903  | no |
| UGT2B28      | -0.002395854 | -0.043058889 | 0.965681196 | 0.98218903  | no |
| OR10J3       | -0.002395205 | -0.043047229 | 0.965690484 | 0.98218903  | no |
| CHIAP2       | -0.002372614 | -0.04264121  | 0.966013891 | 0.982449067 | no |
| NOXRED1      | -0.002370959 | -0.042611467 | 0.966037583 | 0.982449067 | no |
| POLD3        | -0.002361504 | -0.042441543 | 0.966172935 | 0.982540224 | no |
| PSMD6-AS2    | 0.002338291  | 0.042024356  | 0.966505247 | 0.982778762 | no |
| PPID         | 0.002336961  | 0.042000442  | 0.966524296 | 0.982778762 | no |
| MAB21L3      | 0.00233172   | 0.041906261  | 0.966599318 | 0.982778762 | no |
| POPDC3       | 0.00232735   | 0.041827715  | 0.966661884 | 0.982778762 | no |
| OR8D4        | -0.002323339 | -0.041755626 | 0.966719309 | 0.982778762 | no |
| LOC400891    | 0.0023202    | 0.041699208  | 0.966764249 | 0.982778762 | no |
| HIST1H2BA    | 0.002319938  | 0.041694502  | 0.966767998 | 0.982778762 | no |
| ULK4P3       | 0.002319565  | 0.041687799  | 0.966773338 | 0.982778762 | no |
| OR13C5       | -0.002308131 | -0.041482304 | 0.96693703  | 0.982822832 | no |
| TMEM244      | 0.002307588  | 0.041472553  | 0.966944797 | 0.982822832 | no |
| LOC729041    | 0.002303668  | 0.041402092  | 0.967000925 | 0.982822832 | no |
| TMEM251      | 0.002303088  | 0.041391678  | 0.967009221 | 0.982822832 | no |
| OR5B3        | 0.002295103  | 0.041248157  | 0.967123547 | 0.982822832 | no |
| MUC16        | -0.002293334 | -0.041216366 | 0.967148871 | 0.982822832 | no |
| LOC100506393 | -0.002291013 | -0.04117465  | 0.967182102 | 0.982822832 | no |
| DDX50        | 0.002284379  | 0.041055426  | 0.967277075 | 0.982822832 | no |
| BPIFA3       | -0.00228375  | -0.041044118 | 0.967286083 | 0.982822832 | no |
| OR6V1        | -0.002282657 | -0.041024474 | 0.967301731 | 0.982822832 | no |
| HPS6         | 0.002281399  | 0.041001866  | 0.967319741 | 0.982822832 | no |
| PRSS53       | -0.002253973 | -0.040508961 | 0.96771239  | 0.983175293 | no |
| OR2C3        | 0.002250175  | 0.040440706  | 0.967766763 | 0.983184055 | no |
| TMEM171      | 0.00224597   | 0.040365127  | 0.967826971 | 0.983198744 | no |
| CD1E         | 0.002224712  | 0.039983075  | 0.968131322 | 0.983396094 | no |
| COBL         | -0.002223746 | -0.0399657   | 0.968145163 | 0.983396094 | no |
| KIAA0754     | 0.002222813  | 0.039948944  | 0.968158511 | 0.983396094 | no |
| ABHD4        | 0.002201501  | 0.03956591   | 0.96846365  | 0.983659513 | no |
| CCL27        | 0.002198306  | 0.039508494  | 0.96850939  | 0.983659513 | no |
| PSMG1        | -0.0021922   | -0.039398752 | 0.968596815 | 0.983678104 | no |
| NEO1         | -0.002190634 | -0.039370606 | 0.968619238 | 0.983678104 | no |
| HSPB8        | -0.002184393 | -0.039258442 | 0.968708593 | 0.983722363 | no |
| TRMT44       | 0.002179585  | 0.039172026  | 0.968777437 | 0.98374579  | no |



|             |              |              |             |             |    |
|-------------|--------------|--------------|-------------|-------------|----|
| CEP85L      | -0.002166994 | -0.038945739 | 0.96895771  | 0.983846496 | no |
| LINC00410   | 0.002166263  | 0.038932609  | 0.96896817  | 0.983846496 | no |
| RPS26       | -0.002155991 | -0.038747991 | 0.969115248 | 0.983923828 | no |
| HYALP1      | -0.002148216 | -0.038608253 | 0.969226573 | 0.983923828 | no |
| HIST1H3B    | 0.00214804   | 0.038605097  | 0.969229088 | 0.983923828 | no |
| RTP2        | -0.002142982 | -0.038514189 | 0.969301512 | 0.983923828 | no |
| OR4B1       | 0.002141055  | 0.038479566  | 0.969329095 | 0.983923828 | no |
| COL6A4P1    | 0.002138748  | 0.038438102  | 0.969362129 | 0.983923828 | no |
| STARD13-AS2 | 0.002138561  | 0.038434732  | 0.969364814 | 0.983923828 | no |
| HSFY1       | 0.002135347  | 0.038376968  | 0.969410833 | 0.983924067 | no |
| CCDC129     | 0.00212949   | 0.038271704  | 0.969494694 | 0.983962714 | no |
| SLC44A5     | -0.002124588 | -0.038183609 | 0.969564878 | 0.983977375 | no |
| CCL16       | -0.002122085 | -0.038138632 | 0.969600711 | 0.983977375 | no |
| IQCD        | -0.0021118   | -0.03795377  | 0.969747988 | 0.984036614 | no |
| PPIG        | -0.002109627 | -0.037914721 | 0.969779098 | 0.984036614 | no |
| SERPINA9    | -0.002108129 | -0.037887806 | 0.969800541 | 0.984036614 | no |
| IFIT1B      | 0.002105217  | 0.03783547   | 0.969842237 | 0.984036614 | no |
| ZNF213      | 0.002079525  | 0.03737373   | 0.970210106 | 0.9843299   | no |
| SMKR1       | 0.002076589  | 0.037320954  | 0.970252154 | 0.9843299   | no |
| PARS2       | -0.002075395 | -0.037299501 | 0.970269245 | 0.9843299   | no |
| ALDH18A1    | -0.002069451 | -0.037192676 | 0.970354354 | 0.9843299   | no |
| PRSS57      | -0.002069036 | -0.03718521  | 0.970360302 | 0.9843299   | no |
| CDKL4       | 0.002064912  | 0.03711109   | 0.970419355 | 0.98434334  | no |
| SLC35E4     | -0.002053237 | -0.036901273 | 0.97058652  | 0.984466438 | no |
| PMP2        | -0.001967331 | -0.035357331 | 0.971816649 | 0.985605211 | no |
| LINC00658   | 0.001966063  | 0.03533455   | 0.9718348   | 0.985605211 | no |
| MFF         | 0.001965224  | 0.035319463  | 0.97184682  | 0.985605211 | no |
| DYTN        | -0.001961033 | -0.035244155 | 0.971906824 | 0.985619552 | no |
| WRNIP1      | 0.00192564   | 0.034608057  | 0.972413654 | 0.986066757 | no |
| CHURC1      | 0.00192383   | 0.034575529  | 0.972439572 | 0.986066757 | no |
| HTR3D       | -0.001917672 | -0.03446485  | 0.97252776  | 0.986109653 | no |
| DNHD1       | -0.001909894 | -0.034325054 | 0.972639148 | 0.986151295 | no |
| CST9        | -0.001905397 | -0.034244243 | 0.972703538 | 0.986151295 | no |
| BRD4        | 0.001903095  | 0.034202873  | 0.972736502 | 0.986151295 | no |
| SUPT20HL1   | -0.001898539 | -0.03412098  | 0.972801754 | 0.986151295 | no |
| KRTAP27-1   | -0.001897331 | -0.034099283 | 0.972819043 | 0.986151295 | no |
| ZNF470      | -0.001892991 | -0.034021284 | 0.972881193 | 0.986151295 | no |
| TDRD10      | -0.001891585 | -0.033996002 | 0.972901338 | 0.986151295 | no |
| LOC284632   | 0.00188917   | 0.033952598  | 0.972935922 | 0.986151295 | no |
| NRON        | -0.001869946 | -0.033607105 | 0.973211214 | 0.986383805 | no |
| MIR3909     | -0.001862008 | -0.033464437 | 0.973324895 | 0.986452502 | no |
| BOD1        | 0.001856288  | 0.033361636  | 0.973406809 | 0.986489    | no |
| OR13C9      | -0.001852949 | -0.033301634 | 0.97345462  | 0.986490934 | no |
| FAM183B     | -0.001840791 | -0.033083119 | 0.973628739 | 0.986546025 | no |
| OR5B21      | 0.001840148  | 0.03307156   | 0.973637949 | 0.986546025 | no |
| FSHR        | -0.001839537 | -0.033060581 | 0.973646698 | 0.986546025 | no |
| MUTYH       | -0.001801001 | -0.032367996 | 0.974198576 | 0.987058677 | no |
| SAR1A       | 0.001791695  | 0.032200751  | 0.974331846 | 0.987147167 | no |
| ST3GAL6-AS1 | 0.001786245  | 0.032102803  | 0.974409896 | 0.987179704 | no |
| KLHL2       | 0.001776805  | 0.031933148  | 0.974545087 | 0.98726953  | no |
| ONECUT3     | 0.001771061  | 0.031829918  | 0.974627347 | 0.98726953  | no |

|              |              |              |             |             |    |
|--------------|--------------|--------------|-------------|-------------|----|
| CNTNAP1      | -0.001770431 | -0.031818588 | 0.974636375 | 0.98726953  | no |
| SPATA8       | -0.001760283 | -0.03163621  | 0.974781705 | 0.987345962 | no |
| ENAH         | 0.001758746  | 0.031608591  | 0.974803714 | 0.987345962 | no |
| MZF1         | 0.001750341  | 0.031457523  | 0.974924096 | 0.98740714  | no |
| OR2G2        | 0.001748113  | 0.03141748   | 0.974956005 | 0.98740714  | no |
| TOMM7        | 0.001704929  | 0.030641367  | 0.975574476 | 0.987889328 | no |
| GCK          | 0.001704614  | 0.030635704  | 0.975578988 | 0.987889328 | no |
| ASB4         | -0.001703472 | -0.030615187 | 0.975595338 | 0.987889328 | no |
| LOC643441    | -0.001701953 | -0.030587892 | 0.975617089 | 0.987889328 | no |
| SMC1B        | -0.001698821 | -0.030531597 | 0.975661951 | 0.987889328 | no |
| CSDAP1       | 0.00169306   | 0.030428055  | 0.975744463 | 0.987926329 | no |
| NUTF2        | -0.001678878 | -0.030173183 | 0.975947571 | 0.98793877  | no |
| RP1          | -0.001678621 | -0.030168563 | 0.975951252 | 0.98793877  | no |
| OR1N1        | -0.00167478  | -0.03009953  | 0.976006265 | 0.98793877  | no |
| CCDC34       | 0.001673547  | 0.030077356  | 0.976023935 | 0.98793877  | no |
| MOV10        | 0.001670762  | 0.030027307  | 0.97606382  | 0.98793877  | no |
| WDR65        | -0.001669187 | -0.029999004 | 0.976086375 | 0.98793877  | no |
| LOC285626    | 0.001665764  | 0.02993748   | 0.976135403 | 0.98793877  | no |
| KRTAP2-3     | 0.001662109  | 0.0298718    | 0.976187745 | 0.98793877  | no |
| TEX33        | -0.001658167 | -0.029800946 | 0.976244209 | 0.98793877  | no |
| ADAM18       | -0.001657839 | -0.029795049 | 0.976248909 | 0.98793877  | no |
| CCDC51       | 0.001656895  | 0.029778095  | 0.976262419 | 0.98793877  | no |
| DEFB129      | 0.001643451  | 0.029536475  | 0.97645497  | 0.98807736  | no |
| OR4E2        | -0.001638187 | -0.029441858 | 0.976530372 | 0.98807736  | no |
| C1orf210     | 0.00163658   | 0.029412989  | 0.976553379 | 0.98807736  | no |
| AARD         | 0.001630747  | 0.029308152  | 0.976636926 | 0.98807736  | no |
| MYLK3        | -0.001630347 | -0.029300955 | 0.976642661 | 0.98807736  | no |
| UBOX5        | -0.001628073 | -0.029260087 | 0.97667523  | 0.98807736  | no |
| FGF4         | -0.001624787 | -0.02920104  | 0.976722286 | 0.988078453 | no |
| LOC100289561 | -0.001620637 | -0.029126455 | 0.976781724 | 0.988091015 | no |
| DNASE2B      | 0.00161481   | 0.029021728  | 0.976865185 | 0.988091015 | no |
| SOWAHC       | 0.001613388  | 0.028996165  | 0.976885557 | 0.988091015 | no |
| KRT34        | -0.001611108 | -0.028954686 | 0.976918612 | 0.988091015 | no |
| AIM1L        | 0.001604989  | 0.028845225  | 0.977005845 | 0.988132741 | no |
| OR52E6       | 0.001595868  | 0.028681295  | 0.977136487 | 0.988218365 | no |
| FAM127B      | 0.00158791   | 0.028538268  | 0.977250471 | 0.988287134 | no |
| PASD1        | -0.001584283 | -0.028473095 | 0.977302411 | 0.988293154 | no |
| CDK6         | 0.001572404  | 0.028259592  | 0.977472561 | 0.988418708 | no |
| CBX3         | 0.001559565  | 0.028028852  | 0.977656449 | 0.988551835 | no |
| OR52A1       | 0.001553941  | 0.027927769  | 0.977737007 | 0.988551835 | no |
| SSX1         | 0.001553578  | 0.027921243  | 0.977742209 | 0.988551835 | no |
| PIP5K1A      | -0.001544894 | -0.027765169 | 0.977866592 | 0.988629122 | no |
| LDLRAD1      | 0.001541817  | 0.027709881  | 0.977910655 | 0.988629122 | no |
| ENO3         | -0.001528276 | -0.027466507 | 0.978104615 | 0.988704368 | no |
| TDRD12       | 0.001527139  | 0.027446084  | 0.978120892 | 0.988704368 | no |
| LOC151174    | 0.001526985  | 0.027443311  | 0.978123101 | 0.988704368 | no |
| PRPS1L1      | 0.001523737  | 0.02738493   | 0.978169629 | 0.988704896 | no |
| MYBL1        | 0.001508034  | 0.027102723  | 0.97839454  | 0.98888572  | no |
| LGALS9C      | 0.001502347  | 0.027000509  | 0.978476002 | 0.988921546 | no |
| FIGNL1       | -0.001485605 | -0.026699618 | 0.978715806 | 0.989117394 | no |
| MAGEB16      | 0.00148169   | 0.026629259  | 0.978771881 | 0.989127551 | no |

|              |              |              |             |             |    |
|--------------|--------------|--------------|-------------|-------------|----|
| AZGP1        | -0.001459505 | -0.026230541 | 0.979089655 | 0.989376577 | no |
| P2RY6        | 0.001458058  | 0.026204544  | 0.979110373 | 0.989376577 | no |
| RPS7P5       | -0.001446698 | -0.026000378 | 0.979273093 | 0.989494477 | no |
| CHST8        | -0.001436754 | -0.025821665 | 0.979415527 | 0.989570987 | no |
| ANKLE2       | 0.001433827  | 0.025769045  | 0.979457465 | 0.989570987 | no |
| TAS2R1       | -0.001431595 | -0.025728931 | 0.979489436 | 0.989570987 | no |
| CCDC132      | -0.001428554 | -0.025674277 | 0.979532996 | 0.989570987 | no |
| PRC1         | -0.001420508 | -0.025529689 | 0.979648233 | 0.989607843 | no |
| TSEN34       | -0.001417027 | -0.025467127 | 0.979698095 | 0.989607843 | no |
| CEACAM7      | -0.001415287 | -0.025435841 | 0.97972303  | 0.989607843 | no |
| PRADC1       | -0.001413148 | -0.025397401 | 0.979753667 | 0.989607843 | no |
| MTMR12       | 0.001405808  | 0.025265493  | 0.9798588   | 0.989667519 | no |
| SCN7A        | 0.001402514  | 0.02520629   | 0.979905985 | 0.989668665 | no |
| TLL3         | 0.001394598  | 0.025064011  | 0.980019384 | 0.989700416 | no |
| OR8I2        | -0.001391624 | -0.025010576 | 0.980061972 | 0.989700416 | no |
| NIPAL4       | 0.001388254  | 0.024950011  | 0.980110244 | 0.989700416 | no |
| KRT16P3      | -0.00138746  | -0.024935725 | 0.98012163  | 0.989700416 | no |
| PLK1         | -0.001371702 | -0.02465252  | 0.98034735  | 0.989881832 | no |
| ZDHHC4       | 0.001363687  | 0.024508471  | 0.980462161 | 0.989909469 | no |
| LINC00470    | 0.001362732  | 0.024491308  | 0.980475841 | 0.989909469 | no |
| MPHOSPH6     | 0.001360144  | 0.024444803  | 0.980512906 | 0.989909469 | no |
| DAO          | 0.00135132   | 0.024286224  | 0.980639298 | 0.98995783  | no |
| EIF1B-AS1    | 0.001350368  | 0.024269114  | 0.980652935 | 0.98995783  | no |
| DPY30        | 0.001336847  | 0.024026102  | 0.980846624 | 0.990106848 | no |
| SZT2         | -0.001330734 | -0.023916235 | 0.980934192 | 0.990148736 | no |
| BARHL2       | 0.001322419  | 0.023766794  | 0.981053303 | 0.990167197 | no |
| LOC643037    | -0.001319444 | -0.023713335 | 0.981095912 | 0.990167197 | no |
| WDR35        | -0.001318418 | -0.023694889 | 0.981110614 | 0.990167197 | no |
| PFKFB1       | -0.001314018 | -0.023615816 | 0.981173639 | 0.990167197 | no |
| EXOC8        | -0.001307996 | -0.023507584 | 0.981259905 | 0.990167197 | no |
| LOC100129636 | 0.001305382  | 0.023460608  | 0.981297347 | 0.990167197 | no |
| MEIS1-AS3    | 0.001304061  | 0.023436859  | 0.981316276 | 0.990167197 | no |
| AIPL1        | 0.001303217  | 0.023421692  | 0.981328364 | 0.990167197 | no |
| SSX7         | -0.001299844 | -0.023361079 | 0.981376676 | 0.990167197 | no |
| TEX38        | -0.001297293 | -0.023315233 | 0.981413218 | 0.990167197 | no |
| CCT8         | -0.00129183  | -0.023217041 | 0.981491482 | 0.990199673 | no |
| KCNA10       | -0.001267161 | -0.022773689 | 0.981844858 | 0.990509686 | no |
| S100A5       | -0.001259703 | -0.022639662 | 0.981951686 | 0.990570957 | no |
| PIK3C3       | -0.001251733 | -0.022496407 | 0.982065869 | 0.990639643 | no |
| LOC100507250 | -0.001248094 | -0.022431022 | 0.982117985 | 0.990645715 | no |
| MIR3180-5    | -0.001242506 | -0.022330587 | 0.982198039 | 0.990679967 | no |
| GRB10        | 0.001231695  | 0.022136287  | 0.98235291  | 0.9907406   | no |
| ADH6         | -0.001226871 | -0.022049593 | 0.982422011 | 0.9907406   | no |
| NAPRT1       | -0.001226589 | -0.022044514 | 0.982426059 | 0.9907406   | no |
| C7orf45      | -0.001225437 | -0.02202382  | 0.982442554 | 0.9907406   | no |
| KRTAP6-3     | -0.001210612 | -0.021757378 | 0.982654928 | 0.990864178 | no |
| MED25        | -0.001210446 | -0.02175439  | 0.982657309 | 0.990864178 | no |
| SPATA32      | -0.001200467 | -0.021575048 | 0.982800259 | 0.990961827 | no |
| SLC7A11      | 0.001186263  | 0.021319768  | 0.983003739 | 0.991120495 | no |
| ZCCHC8       | 0.001173406  | 0.021088701  | 0.98318792  | 0.991230375 | no |
| HSD17B8      | -0.001172216 | -0.021067316 | 0.983204965 | 0.991230375 | no |

|              |              |              |             |             |    |
|--------------|--------------|--------------|-------------|-------------|----|
| SLC01B7      | -0.001166296 | -0.020960925 | 0.983289769 | 0.991269369 | no |
| OR10K2       | 0.001153564  | 0.020732094  | 0.983472169 | 0.991406744 | no |
| MUC17        | -0.001149825 | -0.020664903 | 0.983525726 | 0.99141423  | no |
| VWC2L-IT1    | -0.001144089 | -0.020561808 | 0.983607902 | 0.991450562 | no |
| TTC3P1       | -0.001110373 | -0.01995586  | 0.984090906 | 0.991854467 | no |
| CCDC102B     | 0.001107     | 0.019895246  | 0.984139222 | 0.991854467 | no |
| ACADM        | -0.001105742 | -0.019872633 | 0.984157247 | 0.991854467 | no |
| C19orf18     | -0.001103231 | -0.019827502 | 0.984193221 | 0.991854467 | no |
| SNX6         | 0.001095342  | 0.019685716  | 0.98430624  | 0.991921851 | no |
| PYGM         | 0.001084862  | 0.019497374  | 0.98445637  | 0.992026626 | no |
| HS6ST2-AS1   | -0.001075157 | -0.019322948 | 0.984595408 | 0.992077603 | no |
| RFPL1        | -0.001074886 | -0.019318087 | 0.984599283 | 0.992077603 | no |
| LRRC49       | -0.001064233 | -0.019126615 | 0.984751909 | 0.992155245 | no |
| OR13C4       | 0.001060136  | 0.019052992  | 0.984810595 | 0.992155245 | no |
| CORO2B       | 0.00105984   | 0.01904767   | 0.984814838 | 0.992155245 | no |
| TLK1         | 0.001055902  | 0.018976886  | 0.984871262 | 0.992165578 | no |
| C17orf47     | 0.001047765  | 0.018830652  | 0.984987828 | 0.992236496 | no |
| CNR1         | -0.001038823 | -0.018669941 | 0.985115935 | 0.992319032 | no |
| NKX2-3       | -0.001034903 | -0.018599487 | 0.985172096 | 0.992329093 | no |
| PLA2G2E      | -0.001024261 | -0.018408238 | 0.985324546 | 0.992436135 | no |
| SMARCAL1     | -0.001017694 | -0.018290219 | 0.985418623 | 0.992484377 | no |
| CCNL2        | 0.001013637  | 0.018217302  | 0.985476748 | 0.992492253 | no |
| HOXC4        | 0.001010701  | 0.018164539  | 0.985518807 | 0.992492253 | no |
| UBQLN1       | 0.001004119  | 0.018046245  | 0.985613104 | 0.99251515  | no |
| PWRN1        | -0.001001967 | -0.018007553 | 0.985643946 | 0.99251515  | no |
| CT62         | -0.000999444 | -0.017962209 | 0.985680091 | 0.99251515  | no |
| C10orf40     | -0.000993854 | -0.01786176  | 0.985760163 | 0.992516031 | no |
| GSTT1        | -0.00099143  | -0.017818189 | 0.985794896 | 0.992516031 | no |
| KCND1        | -0.000989712 | -0.017787304 | 0.985819515 | 0.992516031 | no |
| MMGT1        | -0.000978045 | -0.017577624 | 0.98598666  | 0.992637809 | no |
| MSH4         | -0.000959194 | -0.017238841 | 0.98625672  | 0.99286318  | no |
| TSR1         | -0.000947486 | -0.017028414 | 0.986424462 | 0.992864358 | no |
| VSIG10       | -0.000947483 | -0.017028369 | 0.986424497 | 0.992864358 | no |
| JRKL-AS1     | -0.000946524 | -0.017011131 | 0.986438238 | 0.992864358 | no |
| EFCAB14-AS1  | -0.000945736 | -0.016996964 | 0.986449532 | 0.992864358 | no |
| HOTAIR       | -0.000941351 | -0.016918164 | 0.986512347 | 0.992864358 | no |
| CNBP         | -0.000939764 | -0.016889641 | 0.986535085 | 0.992864358 | no |
| EEF1E1-MUTED | -0.000916096 | -0.016464267 | 0.986874174 | 0.993159114 | no |
| TMIGD1       | -0.000891814 | -0.016027858 | 0.987222063 | 0.993416463 | no |
| FAM66B       | 0.000891794  | 0.016027505  | 0.987222344 | 0.993416463 | no |
| LINC00310    | -0.000881645 | -0.015845116 | 0.987367738 | 0.993495082 | no |
| SPDYE6       | -0.000876928 | -0.015760323 | 0.987435332 | 0.993495082 | no |
| LOC340113    | -0.00087666  | -0.015755524 | 0.987439158 | 0.993495082 | no |
| PCDHB4       | -0.000849504 | -0.015267463 | 0.987828226 | 0.993755658 | no |
| ASB12        | 0.000847337  | 0.015228522  | 0.987859269 | 0.993755658 | no |
| MTERF        | -0.000845739 | -0.015199799 | 0.987882166 | 0.993755658 | no |
| GAST         | 0.000845673  | 0.015198617  | 0.987883108 | 0.993755658 | no |
| SLC19A1      | 0.000834323  | 0.014994618  | 0.988045732 | 0.993806581 | no |
| TTN          | -0.000833918 | -0.014987353 | 0.988051523 | 0.993806581 | no |
| C22orf42     | 0.000832457  | 0.014961091  | 0.988072459 | 0.993806581 | no |
| ARRDC3-AS1   | -0.000820333 | -0.014743189 | 0.988246165 | 0.993913732 | no |

|              |              |              |             |             |    |
|--------------|--------------|--------------|-------------|-------------|----|
| ZNF669       | -0.000814979 | -0.014646964 | 0.988322874 | 0.993913732 | no |
| IVNS1ABP     | -0.000812165 | -0.014596389 | 0.988363192 | 0.993913732 | no |
| OR56A4       | -0.000812109 | -0.014595396 | 0.988363983 | 0.993913732 | no |
| ADAMTSL3     | 0.000800601  | 0.014388571  | 0.988528861 | 0.993961851 | no |
| TGM4         | 0.000796598  | 0.014316618  | 0.988586221 | 0.993961851 | no |
| RGS21        | 0.000794513  | 0.014279158  | 0.988616083 | 0.993961851 | no |
| MTVR2        | 0.000793789  | 0.014266145  | 0.988626457 | 0.993961851 | no |
| KRTAP5-8     | 0.000790702  | 0.014210659  | 0.988670689 | 0.993961851 | no |
| EIF3B        | 0.000789401  | 0.014187271  | 0.988689334 | 0.993961851 | no |
| OR5V1        | 0.000783236  | 0.014076476  | 0.988777658 | 0.994004147 | no |
| GOSR1        | 0.000769842  | 0.013835751  | 0.988969562 | 0.994150562 | no |
| TMEM66       | -0.000735958 | -0.013226785 | 0.989455026 | 0.994531801 | no |
| STAC3        | 0.000734403  | 0.01319885   | 0.989477296 | 0.994531801 | no |
| DBR1         | -0.000733681 | -0.013185868 | 0.989487645 | 0.994531801 | no |
| OR1J4        | -0.000722799 | -0.012990292 | 0.989643558 | 0.994641992 | no |
| ANKRD36BP2   | 0.000717651  | 0.01289777   | 0.989717317 | 0.994669606 | no |
| MRGPRX1      | 0.000713306  | 0.012819684  | 0.989779567 | 0.994685652 | no |
| SLC35B1      | -0.000709459 | -0.012750536 | 0.989834692 | 0.994694537 | no |
| USP36        | 0.000704881  | 0.012668263  | 0.98990028  | 0.994713935 | no |
| KRTAP11-1    | 0.000698027  | 0.012545091  | 0.989998473 | 0.994743314 | no |
| LRRC37A5P    | 0.000695594  | 0.01250136   | 0.990033336 | 0.994743314 | no |
| MTFR1        | 0.000693148  | 0.012457405  | 0.990068377 | 0.994743314 | no |
| DRAXIN       | 0.000677253  | 0.012171735  | 0.990296115 | 0.994925614 | no |
| C22orf31     | 0.00066612   | 0.011971642  | 0.990455631 | 0.995039101 | no |
| C15orf60     | -0.000660932 | -0.011878405 | 0.99052996  | 0.995039101 | no |
| TMEM14E      | 0.000654753  | 0.011767362  | 0.990618485 | 0.995039101 | no |
| ASB15        | -0.000653913 | -0.011752256 | 0.990630528 | 0.995039101 | no |
| ZNF688       | -0.000653212 | -0.011739652 | 0.990640575 | 0.995039101 | no |
| DNAJA1       | 0.000649591  | 0.011674591  | 0.990692443 | 0.995044693 | no |
| CRNDE        | -0.00064374  | -0.011569434 | 0.990776276 | 0.995082388 | no |
| OR6C6        | -0.000636616 | -0.011441401 | 0.990878345 | 0.995108802 | no |
| HTA          | -0.000635441 | -0.011420281 | 0.990895183 | 0.995108802 | no |
| HAUS5        | 0.0006195    | 0.011133778  | 0.991123588 | 0.99529167  | no |
| LOC100506025 | -0.000610674 | -0.010975156 | 0.991250044 | 0.995372147 | no |
| GSTM5        | -0.000601631 | -0.010812642 | 0.991379603 | 0.99541213  | no |
| PDGFC        | -0.000595772 | -0.010707334 | 0.991463557 | 0.99541213  | no |
| DHX15        | -0.000594573 | -0.01068579  | 0.991480733 | 0.99541213  | no |
| DSG4         | -0.000594139 | -0.010677993 | 0.991486948 | 0.99541213  | no |
| TRA2B        | 0.000590375  | 0.010610344  | 0.991540879 | 0.99541213  | no |
| SNORA81      | 0.000588499  | 0.010576617  | 0.991567767 | 0.99541213  | no |
| ZC3H10       | 0.000582539  | 0.010469517  | 0.99165315  | 0.995451345 | no |
| KRTAP24-1    | 0.0005683    | 0.010213606  | 0.991857169 | 0.995609641 | no |
| ZBTB41       | 0.000562911  | 0.010116755  | 0.991934381 | 0.995640642 | no |
| TMEM229A     | -0.000539618 | -0.009698121 | 0.992268127 | 0.99592912  | no |
| ALDH1A1      | 0.00051831   | 0.009315167  | 0.99257343  | 0.996126719 | no |
| TYMS         | 0.00051678   | 0.009287678  | 0.992595345 | 0.996126719 | no |
| TFF1         | 0.000516172  | 0.009276757  | 0.992604052 | 0.996126719 | no |
| CT45A5       | -0.000485571 | -0.008726776 | 0.993042516 | 0.996453318 | no |
| LOC550113    | 0.000485207  | 0.008720236  | 0.99304773  | 0.996453318 | no |
| KRTAP3-2     | 0.000483751  | 0.008694065  | 0.993068595 | 0.996453318 | no |
| GPX6         | 0.000476414  | 0.008562214  | 0.993173711 | 0.996500596 | no |

|              |              |              |             |             |    |
|--------------|--------------|--------------|-------------|-------------|----|
| MIR941-1     | -0.00047399  | -0.008518642 | 0.993208448 | 0.996500596 | no |
| LDHAL6A      | -0.000464282 | -0.008344168 | 0.993347545 | 0.996593628 | no |
| DLGAP5       | -0.000447987 | -0.008051321 | 0.993581015 | 0.996781327 | no |
| ZNF700       | 0.000440676  | 0.007919925  | 0.99368577  | 0.996839886 | no |
| PIAS1        | 0.000434234  | 0.007804147  | 0.993778073 | 0.996885948 | no |
| MLLT1        | -0.000427902 | -0.007690337 | 0.993868807 | 0.99690395  | no |
| LPAR2        | 0.000426507  | 0.007665269  | 0.993888792 | 0.99690395  | no |
| IRF2BP2      | 0.000414163  | 0.00744343   | 0.994065652 | 0.997034813 | no |
| ACAD9        | 0.000398539  | 0.007162619  | 0.994289527 | 0.997212816 | no |
| ENPP7        | 0.00038062   | 0.006840573  | 0.994546278 | 0.997272107 | no |
| TSGA10       | -0.000380212 | -0.006833255 | 0.994552112 | 0.997272107 | no |
| OR5H2        | -0.000378114 | -0.006795542 | 0.994582179 | 0.997272107 | no |
| MT1X         | 0.000375764  | 0.0067533    | 0.994615856 | 0.997272107 | no |
| MMP26        | -0.000375376 | -0.006746333 | 0.994621411 | 0.997272107 | no |
| TBC1D21      | -0.000374981 | -0.006739236 | 0.994627069 | 0.997272107 | no |
| KPNB1        | -0.000364875 | -0.006557614 | 0.994771867 | 0.997370758 | no |
| TGM5         | -0.000354362 | -0.00636866  | 0.994922511 | 0.99747526  | no |
| LOC653501    | -0.000340616 | -0.00612162  | 0.995119463 | 0.997626179 | no |
| HEATR8-TTC4  | -0.000322084 | -0.005788557 | 0.995384999 | 0.997845835 | no |
| MYBBP1A      | 0.000310943  | 0.005588323  | 0.995544637 | 0.997922878 | no |
| OR6F1        | -0.000310239 | -0.005575675 | 0.99555472  | 0.997922878 | no |
| SMEK3P       | 0.000301862  | 0.005425131  | 0.995674742 | 0.997960845 | no |
| OR2A12       | -0.000301114 | -0.005411675 | 0.99568547  | 0.997960845 | no |
| BCAP29       | 0.000292011  | 0.005248076  | 0.995815901 | 0.997993494 | no |
| KRTAP7-1     | -0.000291802 | -0.005244323 | 0.995818893 | 0.997993494 | no |
| CYMP         | 0.000289117  | 0.005196076  | 0.995857358 | 0.997993494 | no |
| LINC00486    | 0.000281599  | 0.00506095   | 0.995965088 | 0.998054915 | no |
| GCNT7        | 0.000262277  | 0.004713694  | 0.99624194  | 0.99819743  | no |
| MRGPRX2      | 0.000260177  | 0.00467595   | 0.996272032 | 0.99819743  | no |
| OR7G1        | 0.000259191  | 0.004658228  | 0.996286161 | 0.99819743  | no |
| ZNF479       | -0.000254796 | -0.00457924  | 0.996349135 | 0.99819743  | no |
| LINC00297    | 0.000253025  | 0.004547417  | 0.996374506 | 0.99819743  | no |
| SUGT1        | 0.000249007  | 0.004475213  | 0.996432071 | 0.99819743  | no |
| HRG          | -0.000248982 | -0.004474757 | 0.996432435 | 0.99819743  | no |
| F11          | 0.000240309  | 0.004318883  | 0.996556707 | 0.998275388 | no |
| LOC100286922 | -0.000235095 | -0.004225183 | 0.99663141  | 0.998303688 | no |
| C1orf100     | -0.000217492 | -0.003908817 | 0.996883636 | 0.998509798 | no |
| COL19A1      | -0.000211566 | -0.003802313 | 0.996968547 | 0.998535609 | no |
| UGT1A10      | 0.000209209  | 0.003759939  | 0.997002331 | 0.998535609 | no |
| IMMP2L       | 0.000203527  | 0.003657834  | 0.997083736 | 0.998570603 | no |
| TBL1Y        | -0.000199253 | -0.003581013 | 0.997144981 | 0.998585405 | no |
| THPO         | -0.000194523 | -0.003496002 | 0.997212758 | 0.998606746 | no |
| EDN2         | -0.000188487 | -0.003387532 | 0.997299237 | 0.998646813 | no |
| ELAC1        | 0.000184226  | 0.003310955  | 0.997360288 | 0.998661415 | no |
| FAM138B      | -0.000172016 | -0.003091504 | 0.997535249 | 0.998748119 | no |
| PPIEL        | 0.000171697  | 0.003085764  | 0.997539825 | 0.998748119 | no |
| SLC38A5      | -0.00016175  | -0.002906998 | 0.997682349 | 0.99881621  | no |
| CSNK1G2-AS1  | -0.000156067 | -0.00280487  | 0.997763772 | 0.99881621  | no |
| DUOX2        | 0.000153306  | 0.002755243  | 0.997803338 | 0.99881621  | no |
| FKBPL        | -0.000153076 | -0.002751121 | 0.997806624 | 0.99881621  | no |
| BMP10        | -0.000150658 | -0.002707652 | 0.997841281 | 0.99881621  | no |

|             |              |              |             |             |    |
|-------------|--------------|--------------|-------------|-------------|----|
| MRPL22      | 0.000147489  | 0.002650696  | 0.99788669  | 0.99881621  | no |
| TRIM15      | -0.00012637  | -0.002271156 | 0.998189284 | 0.999026738 | no |
| KRTAP15-1   | -0.00012351  | -0.002219749 | 0.998230268 | 0.999026738 | no |
| OR51Q1      | -0.000121661 | -0.002186515 | 0.998256765 | 0.999026738 | no |
| POF1B       | -0.000119832 | -0.002153652 | 0.998282965 | 0.999026738 | no |
| CDS1        | -0.000116378 | -0.002091568 | 0.998332463 | 0.999029752 | no |
| TNNT1       | 9.05E-05     | 0.00162616   | 0.998703517 | 0.999253685 | no |
| TTLL9       | -8.99E-05    | -0.00161575  | 0.998711816 | 0.999253685 | no |
| RAB4B-EGLN2 | 8.89E-05     | 0.00159854   | 0.998725537 | 0.999253685 | no |
| RDH13       | 8.49E-05     | 0.001525139  | 0.998784057 | 0.999253685 | no |
| FHIT        | 8.30E-05     | 0.001491183  | 0.998811129 | 0.999253685 | no |
| ANP32C      | -8.13E-05    | -0.001460969 | 0.998835218 | 0.999253685 | no |
| CCL3L3      | 7.45E-05     | 0.001338276  | 0.998933037 | 0.999305027 | no |
| XPNPEP1     | 6.85E-05     | 0.001230361  | 0.999019074 | 0.999344578 | no |
| AKT1S1      | -5.90E-05    | -0.001059615 | 0.999155204 | 0.999407994 | no |
| LINC00102   | 5.75E-05     | 0.001034188  | 0.999175476 | 0.999407994 | no |
| OR4S2       | -4.36E-05    | -0.000784179 | 0.9993748   | 0.999560842 | no |
| C1orf180    | -3.09E-05    | -0.000555477 | 0.999557136 | 0.999696687 | no |
| PARD6B      | 2.52E-05     | 0.000452296  | 0.999639399 | 0.999732437 | no |
| FYTDD1      | 1.97E-05     | 0.000354522  | 0.999717351 | 0.999763871 | no |
| MARS        | -8.49E-07    | -1.53E-05    | 0.999987828 | 0.999987828 | no |
