# Supplementary material for: CD96, a new immune checkpoint, correlates with immune profile and clinical outcome of glioma
Source: PubMed Central journal article supplement (PMC7330044; doi:10.1038/s41598-020-66806-z), 2020-07-01
Supplement: 41598_2020_66806_MOESM5_ESM.pdf [file 41598_2020_66806_MOESM5_ESM.pdf]

# **CD96, a new immune checkpoint, correlates with immune profile and clinical outcome of glioma**

**Fangkun Liu<sup>1,2†</sup>, Jing Huang<sup>3,4</sup>, Fengqiong He<sup>1,2</sup>, Xiaodong Ma<sup>5</sup>, Fan Fan<sup>1,2</sup>, Ming Meng<sup>1,2</sup>, Yang Zhuo<sup>1,2</sup>, and Liyang Zhang<sup>1,2\*</sup>**

<sup>1</sup> Department of Neurosurgery, Xiangya Hospital, Central South University, Central South University; 87 Xiangya Road; Changsha, Hunan, 410008. China;

<sup>2</sup> Clinical Diagnosis and Therapy Center for Glioma of Xiangya Hospital, Central South University; 87 Xiangya Road; Changsha, Hunan, 410008. China;

<sup>3</sup> Department of Psychiatry, The Second Xiangya Hospital, Central South University, Changsha, Hunan 410011, China;

<sup>4</sup> Mental Health Institute of the Second Xiangya Hospital, Central South University, Chinese National Clinical Research Center on Mental Disorders (xiangya), Chinese National Technology Institute on Mental Disorders, Hunan Key Laboratory of Psychiatry and Mental Health, Changsha, Hunan 410011, China;

<sup>5</sup> Director and Training and Exchange Cooperation Center, Orient Science & Technology College, Hunan Agricultural University, Changsha, Hunan 410000, China.

†The first author;

\*Corresponding Author:

Dr. Liyang Zhang MD, Ph. D

Department of Neurosurgery, Xiangya Hospital, Central South University

87 Xiangya Rd, Changsha, Hunan, 410008, China,

Email: [zhangliyang@csu.edu.cn](mailto:zhangliyang@csu.edu.cn)

| gene     | cor         | t. value    | p. value  | FDR       | significant |
|----------|-------------|-------------|-----------|-----------|-------------|
| LCK      | 0.957297036 | 87.4189774  |           | 0         | 0 yes       |
| CD3G     | 0.951261179 | 81.4368469  |           | 0         | 0 yes       |
| CD2      | 0.947214404 | 78.00098355 |           | 0         | 0 yes       |
| CD3E     | 0.944886702 | 76.1939995  |           | 0         | 0 yes       |
| ICOS     | 0.943504476 | 75.17277117 |           | 0         | 0 yes       |
| PYHIN1   | 0.940047741 | 72.77082753 |           | 0         | 0 yes       |
| SIRPG    | 0.939364704 | 72.31995251 |           | 0         | 0 yes       |
| P2RY10   | 0.922382418 | 63.04163324 | 3.84E-290 | 9.71E-287 | yes         |
| CD5      | 0.921228008 | 62.51844298 | 5.35E-288 | 1.20E-284 | yes         |
| TRAT1    | 0.92079764  | 62.32621012 | 3.31E-287 | 6.69E-284 | yes         |
| SIT1     | 0.91743398  | 60.87378756 | 3.55E-281 | 6.53E-278 | yes         |
| SH2D1A   | 0.90670004  | 56.75421311 | 1.60E-263 | 2.70E-260 | yes         |
| GZMK     | 0.900437282 | 54.65057236 | 3.49E-254 | 5.43E-251 | yes         |
| SLAMF6   | 0.898665556 | 54.0893428  | 1.18E-251 | 1.70E-248 | yes         |
| CXCR6    | 0.892954527 | 52.37107505 | 8.26E-244 | 1.11E-240 | yes         |
| CD27     | 0.892232011 | 52.16294555 | 7.55E-243 | 9.54E-240 | yes         |
| SLA2     | 0.888913376 | 51.23171864 | 1.60E-238 | 1.90E-235 | yes         |
| IL2RB    | 0.888844082 | 51.21269419 | 1.96E-238 | 2.21E-235 | yes         |
| CXCR3    | 0.887798657 | 50.92769355 | 4.23E-237 | 4.50E-234 | yes         |
| CCR7     | 0.876391153 | 48.04275554 | 2.34E-223 | 2.37E-220 | yes         |
| CD247    | 0.87241658  | 47.12397754 | 6.93E-219 | 6.67E-216 | yes         |
| IL2RG    | 0.86983872  | 46.54919178 | 4.58E-216 | 4.21E-213 | yes         |
| CCR4     | 0.867720758 | 46.08871029 | 8.58E-214 | 7.55E-211 | yes         |
| CD40LG   | 0.864825576 | 45.4756109  | 9.49E-211 | 7.99E-208 | yes         |
| TBC1D10C | 0.863505756 | 45.20214954 | 2.19E-209 | 1.77E-206 | yes         |
| GPR171   | 0.863099545 | 45.1187232  | 5.73E-209 | 4.46E-206 | yes         |
| LY9      | 0.862943315 | 45.08672863 | 8.28E-209 | 6.20E-206 | yes         |
| SLAMF1   | 0.861509844 | 44.79551279 | 2.38E-207 | 1.72E-204 | yes         |
| CD3D     | 0.855157376 | 43.55358059 | 4.48E-201 | 3.12E-198 | yes         |
| CCL5     | 0.846976862 | 42.06090926 | 2.00E-193 | 1.35E-190 | yes         |
| CD6      | 0.832029156 | 39.59786696 | 1.53E-180 | 1.00E-177 | yes         |
| GVIN1    | 0.826687792 | 38.78923131 | 3.05E-176 | 1.93E-173 | yes         |
| TXK      | 0.823802471 | 38.36636669 | 5.57E-174 | 3.41E-171 | yes         |
| IKZF3    | 0.823311887 | 38.29540143 | 1.34E-173 | 7.95E-171 | yes         |
| ACAP1    | 0.820080087 | 37.83448183 | 4.01E-171 | 2.31E-168 | yes         |
| GRAP2    | 0.818194135 | 37.57064752 | 1.06E-169 | 5.95E-167 | yes         |
| GZMA     | 0.797315653 | 34.87581747 | 5.52E-155 | 3.01E-152 | yes         |
| EOMES    | 0.79432709  | 34.52044687 | 5.09E-153 | 2.71E-150 | yes         |
| GPR18    | 0.791799118 | 34.22515799 | 2.21E-151 | 1.14E-148 | yes         |
| FASLG    | 0.790148006 | 34.03484825 | 2.52E-150 | 1.27E-147 | yes         |
| CD8A     | 0.787608674 | 33.74599704 | 1.02E-148 | 5.02E-146 | yes         |
| CCR8     | 0.784375162 | 33.38472043 | 1.05E-146 | 5.07E-144 | yes         |
| ZNF683   | 0.776699713 | 32.55501331 | 4.65E-142 | 2.19E-139 | yes         |
| PARP15   | 0.774998818 | 32.37620907 | 4.70E-141 | 2.16E-138 | yes         |
| ZC3H12D  | 0.770135172 | 31.87453585 | 3.14E-138 | 1.41E-135 | yes         |
| BTLA     | 0.766790149 | 31.53747965 | 2.51E-136 | 1.10E-133 | yes         |
| LTB      | 0.761263569 | 30.99416291 | 2.97E-133 | 1.28E-130 | yes         |
| IL7R     | 0.759800019 | 30.8530104  | 1.87E-132 | 7.89E-130 | yes         |
| SLAMF8   | 0.755393584 | 30.4346636  | 4.44E-130 | 1.83E-127 | yes         |
| ZAP70    | 0.751962282 | 30.11557825 | 2.89E-128 | 1.17E-125 | yes         |

|              |             |             |           |           |     |
|--------------|-------------|-------------|-----------|-----------|-----|
| FCRL3        | 0.750058543 | 29.94098705 | 2.85E-127 | 1.13E-124 | yes |
| HLA-DQA1     | 0.749481076 | 29.88836559 | 5.68E-127 | 2.21E-124 | yes |
| AN09         | 0.748433096 | 29.79326583 | 1.98E-126 | 7.55E-124 | yes |
| CTSW         | 0.74451839  | 29.44246856 | 1.98E-124 | 7.41E-122 | yes |
| CCR5         | 0.7422304   | 29.24061374 | 2.81E-123 | 1.03E-120 | yes |
| GFI1         | 0.741628341 | 29.18787838 | 5.62E-123 | 2.03E-120 | yes |
| CXCR5        | 0.74128896  | 29.15822059 | 8.30E-123 | 2.94E-120 | yes |
| ZBED2        | 0.740618175 | 29.09974795 | 1.79E-122 | 6.24E-120 | yes |
| GZMH         | 0.730596601 | 28.24844707 | 1.33E-117 | 4.55E-115 | yes |
| CCR2         | 0.729354941 | 28.14577407 | 5.14E-117 | 1.73E-114 | yes |
| C16orf54     | 0.723044051 | 27.63297267 | 4.47E-114 | 1.48E-111 | yes |
| NKG7         | 0.715780565 | 27.06066925 | 8.57E-111 | 2.80E-108 | yes |
| FCRL6        | 0.714493948 | 26.96120549 | 3.19E-110 | 1.02E-107 | yes |
| SLAMF7       | 0.711228514 | 26.71126102 | 8.68E-109 | 2.74E-106 | yes |
| HLA-DPB1     | 0.709276699 | 26.56354147 | 6.12E-108 | 1.90E-105 | yes |
| CD7          | 0.707127316 | 26.402291   | 5.16E-107 | 1.58E-104 | yes |
| DAPP1        | 0.706625782 | 26.36487672 | 8.45E-107 | 2.55E-104 | yes |
| EMB          | 0.705271842 | 26.26426848 | 3.20E-106 | 9.50E-104 | yes |
| GCET2        | 0.704401359 | 26.19988725 | 7.49E-106 | 2.19E-103 | yes |
| PTPN22       | 0.699914813 | 25.87174464 | 5.73E-104 | 1.65E-101 | yes |
| S1PR4        | 0.699721685 | 25.85775582 | 6.89E-104 | 1.96E-101 | yes |
| CD79A        | 0.696632911 | 25.63552414 | 1.30E-102 | 3.65E-100 | yes |
| XCL2         | 0.695442051 | 25.5505876  | 3.99E-102 | 1.11E-99  | yes |
| PDCD1        | 0.694214018 | 25.46342663 | 1.26E-101 | 3.45E-99  | yes |
| XCR1         | 0.692262765 | 25.32581553 | 7.78E-101 | 2.10E-98  | yes |
| HLA-DPA1     | 0.690538517 | 25.20510211 | 3.83E-100 | 1.02E-97  | yes |
| PTPRC        | 0.690077742 | 25.17298305 | 5.86E-100 | 1.54E-97  | yes |
| CD28         | 0.687834422 | 25.01744011 | 4.57E-99  | 1.18E-96  | yes |
| CNR2         | 0.687066904 | 24.96453706 | 9.18E-99  | 2.35E-96  | yes |
| CST7         | 0.685210512 | 24.83723327 | 4.93E-98  | 1.25E-95  | yes |
| HLA-DOA      | 0.685161238 | 24.83386674 | 5.15E-98  | 1.29E-95  | yes |
| LOC100188949 | 0.680763195 | 24.53594076 | 2.62E-96  | 6.47E-94  | yes |
| RAC2         | 0.676392127 | 24.24474314 | 1.22E-94  | 2.97E-92  | yes |
| FOXP3        | 0.675172277 | 24.16432721 | 3.51E-94  | 8.46E-92  | yes |
| CD52         | 0.671836252 | 23.94625774 | 6.21E-93  | 1.48E-90  | yes |
| GPR141       | 0.67128949  | 23.91077214 | 9.90E-93  | 2.33E-90  | yes |
| CD8B         | 0.670781385 | 23.87785909 | 1.53E-92  | 3.55E-90  | yes |
| DENND2D      | 0.670056434 | 23.83100541 | 2.83E-92  | 6.50E-90  | yes |
| FCRL1        | 0.668805438 | 23.750444   | 8.16E-92  | 1.85E-89  | yes |
| TLR8         | 0.668249572 | 23.71476479 | 1.30E-91  | 2.93E-89  | yes |
| TRAF3IP3     | 0.668032779 | 23.70086899 | 1.57E-91  | 3.48E-89  | yes |
| ARHGAP30     | 0.666874136 | 23.62678789 | 4.14E-91  | 9.11E-89  | yes |
| MS4A1        | 0.663011767 | 23.38205057 | 1.03E-89  | 2.24E-87  | yes |
| 1-Sep        | 0.659579539 | 23.16736816 | 1.73E-88  | 3.71E-86  | yes |
| IL16         | 0.656193076 | 22.95806289 | 2.68E-87  | 5.70E-85  | yes |
| CSF2RB       | 0.654870839 | 22.87700473 | 7.75E-87  | 1.63E-84  | yes |
| HLA-DRA      | 0.65295673  | 22.76031328 | 3.57E-86  | 7.43E-84  | yes |
| APOBEC3D     | 0.65257559  | 22.73716861 | 4.83E-86  | 9.88E-84  | yes |
| TNFRSF13B    | 0.65257326  | 22.73702722 | 4.84E-86  | 9.88E-84  | yes |
| PSTPIP2      | 0.6504711   | 22.60991281 | 2.55E-85  | 5.15E-83  | yes |
| LY75         | 0.649448438 | 22.54840053 | 5.69E-85  | 1.14E-82  | yes |

|           |             |             |          |          |     |
|-----------|-------------|-------------|----------|----------|-----|
| CD74      | 0.648440818 | 22.48799992 | 1.25E-84 | 2.48E-82 | yes |
| HLA-DMA   | 0.644754338 | 22.26874543 | 2.19E-83 | 4.30E-81 | yes |
| IL10RA    | 0.644405327 | 22.24812674 | 2.87E-83 | 5.57E-81 | yes |
| KLRB1     | 0.644174989 | 22.23453203 | 3.42E-83 | 6.59E-81 | yes |
| CYTIP     | 0.643478012 | 22.19345884 | 5.84E-83 | 1.11E-80 | yes |
| FCRL2     | 0.643272801 | 22.18138358 | 6.84E-83 | 1.29E-80 | yes |
| CTSS      | 0.640882877 | 22.04135094 | 4.23E-82 | 7.93E-80 | yes |
| PTPN7     | 0.640836468 | 22.03864252 | 4.39E-82 | 8.14E-80 | yes |
| TFEC      | 0.640482739 | 22.01801248 | 5.74E-82 | 1.05E-79 | yes |
| CLEC12A   | 0.638197102 | 21.88528063 | 3.22E-81 | 5.87E-79 | yes |
| LAIR1     | 0.637082368 | 21.82090082 | 7.44E-81 | 1.34E-78 | yes |
| LAX1      | 0.635424283 | 21.72556634 | 2.57E-80 | 4.59E-78 | yes |
| SH2D3A    | 0.634951114 | 21.69845336 | 3.65E-80 | 6.47E-78 | yes |
| P2RY8     | 0.634896097 | 21.69530352 | 3.80E-80 | 6.68E-78 | yes |
| PTGER4    | 0.631901965 | 21.52471019 | 3.47E-79 | 6.05E-77 | yes |
| LCP1      | 0.631409741 | 21.49681973 | 4.99E-79 | 8.61E-77 | yes |
| CCR6      | 0.630678965 | 21.45549203 | 8.51E-79 | 1.46E-76 | yes |
| FAIM3     | 0.630322094 | 21.43534435 | 1.11E-78 | 1.88E-76 | yes |
| POU2AF1   | 0.628134867 | 21.31235159 | 5.43E-78 | 9.14E-76 | yes |
| PTPRCAP   | 0.627742058 | 21.2903518  | 7.21E-78 | 1.21E-75 | yes |
| RHOH      | 0.627070643 | 21.2528104  | 1.17E-77 | 1.94E-75 | yes |
| CCL21     | 0.626925633 | 21.24471258 | 1.30E-77 | 2.14E-75 | yes |
| HLA-DRB1  | 0.626714995 | 21.23295637 | 1.51E-77 | 2.47E-75 | yes |
| GPR132    | 0.626307165 | 21.21021626 | 2.03E-77 | 3.29E-75 | yes |
| SLFN12L   | 0.626092693 | 21.198269   | 2.37E-77 | 3.80E-75 | yes |
| MAP4K1    | 0.626004876 | 21.1933794  | 2.53E-77 | 4.02E-75 | yes |
| FCRL5     | 0.6239904   | 21.08157735 | 1.07E-76 | 1.69E-74 | yes |
| SAMD3     | 0.623044808 | 21.02933553 | 2.10E-76 | 3.29E-74 | yes |
| GIMAP4    | 0.621994468 | 20.97148332 | 4.42E-76 | 6.88E-74 | yes |
| CD48      | 0.621651112 | 20.95261154 | 5.64E-76 | 8.71E-74 | yes |
| ITGAL     | 0.619559916 | 20.83809708 | 2.46E-75 | 3.77E-73 | yes |
| TLR2      | 0.617231201 | 20.71142308 | 1.26E-74 | 1.91E-72 | yes |
| LOC647121 | 0.615015288 | 20.59170177 | 5.85E-74 | 8.82E-72 | yes |
| FGL2      | 0.613821084 | 20.52750745 | 1.33E-73 | 1.99E-71 | yes |
| CETN1     | 0.613388607 | 20.5043156  | 1.79E-73 | 2.67E-71 | yes |
| TGFBR2    | 0.612243924 | 20.44307361 | 3.93E-73 | 5.80E-71 | yes |
| PIK3R5    | 0.612062133 | 20.43336651 | 4.45E-73 | 6.52E-71 | yes |
| CD4       | 0.611634827 | 20.41057007 | 5.96E-73 | 8.67E-71 | yes |
| FCGR2C    | 0.609968348 | 20.32193667 | 1.85E-72 | 2.68E-70 | yes |
| DOK3      | 0.609158448 | 20.27901663 | 3.21E-72 | 4.60E-70 | yes |
| CD79B     | 0.608732183 | 20.25646757 | 4.28E-72 | 6.09E-70 | yes |
| C17orf87  | 0.606207745 | 20.12349577 | 2.34E-71 | 3.31E-69 | yes |
| FERMT3    | 0.605712622 | 20.09752906 | 3.26E-71 | 4.57E-69 | yes |
| BATF      | 0.605532602 | 20.08809704 | 3.67E-71 | 5.12E-69 | yes |
| SASH3     | 0.605037582 | 20.06218595 | 5.11E-71 | 7.08E-69 | yes |
| RCSD1     | 0.604018269 | 20.00894699 | 1.01E-70 | 1.39E-68 | yes |
| CECR1     | 0.60396616  | 20.0062295  | 1.04E-70 | 1.42E-68 | yes |
| JAK3      | 0.602450163 | 19.92734592 | 2.85E-70 | 3.86E-68 | yes |
| GPR82     | 0.601646444 | 19.88566265 | 4.84E-70 | 6.52E-68 | yes |
| RIPK3     | 0.601492153 | 19.8776715  | 5.36E-70 | 7.17E-68 | yes |
| HCLS1     | 0.601293407 | 19.86738301 | 6.11E-70 | 8.12E-68 | yes |

|          |             |             |          |          |     |
|----------|-------------|-------------|----------|----------|-----|
| APOBEC3H | 0.600781552 | 19.84091245 | 8.55E-70 | 1.13E-67 | yes |
| ALOX5    | 0.600267684 | 19.81437622 | 1.20E-69 | 1.57E-67 | yes |
| ITGB2    | 0.598793853 | 19.73847964 | 3.14E-69 | 4.10E-67 | yes |
| TNFSF8   | 0.597925734 | 19.69392141 | 5.53E-69 | 7.17E-67 | yes |
| LHFPL2   | 0.597764665 | 19.68566604 | 6.14E-69 | 7.91E-67 | yes |
| GIMAP6   | 0.597568155 | 19.67559918 | 6.98E-69 | 8.93E-67 | yes |
| AOAH     | 0.595675816 | 19.57893959 | 2.37E-68 | 3.02E-66 | yes |
| EPHA1    | 0.59496233  | 19.54262665 | 3.76E-68 | 4.75E-66 | yes |
| RUNX3    | 0.59379161  | 19.48319751 | 7.98E-68 | 1.00E-65 | yes |
| NFAM1    | 0.593683162 | 19.47770206 | 8.55E-68 | 1.07E-65 | yes |
| LCP2     | 0.592870193 | 19.43655821 | 1.44E-67 | 1.78E-65 | yes |
| ATP2A3   | 0.590939695 | 19.33922314 | 4.92E-67 | 6.06E-65 | yes |
| CD200R1  | 0.590248506 | 19.30449809 | 7.62E-67 | 9.34E-65 | yes |
| FAM113B  | 0.589578632 | 19.27090607 | 1.16E-66 | 1.42E-64 | yes |
| GAPT     | 0.589487753 | 19.26635345 | 1.23E-66 | 1.49E-64 | yes |
| MFSD1    | 0.588010193 | 19.19249187 | 3.13E-66 | 3.76E-64 | yes |
| CD163    | 0.587144951 | 19.14937587 | 5.38E-66 | 6.43E-64 | yes |
| FCGR3A   | 0.586952611 | 19.13980499 | 6.07E-66 | 7.21E-64 | yes |
| SPN      | 0.586588292 | 19.12168991 | 7.62E-66 | 9.01E-64 | yes |
| MS4A6A   | 0.585940832 | 19.08953984 | 1.14E-65 | 1.34E-63 | yes |
| SIRPB2   | 0.585552565 | 19.07028688 | 1.45E-65 | 1.70E-63 | yes |
| PLEK     | 0.585399822 | 19.0627183  | 1.60E-65 | 1.86E-63 | yes |
| CXCL9    | 0.585210179 | 19.05332562 | 1.80E-65 | 2.08E-63 | yes |
| AMICA1   | 0.584875649 | 19.03676845 | 2.21E-65 | 2.54E-63 | yes |
| MS4A7    | 0.5836774   | 18.97758362 | 4.66E-65 | 5.32E-63 | yes |
| SP140    | 0.583504385 | 18.96905352 | 5.18E-65 | 5.89E-63 | yes |
| CASP8    | 0.582482623 | 18.91875746 | 9.74E-65 | 1.10E-62 | yes |
| ALPK1    | 0.58243584  | 18.91645787 | 1.00E-64 | 1.13E-62 | yes |
| FPR3     | 0.581638646 | 18.87731532 | 1.64E-64 | 1.83E-62 | yes |
| HLA-DMB  | 0.58111826  | 18.85180852 | 2.25E-64 | 2.50E-62 | yes |
| DOK2     | 0.579564688 | 18.77586724 | 5.83E-64 | 6.44E-62 | yes |
| LILRB2   | 0.579242367 | 18.76015031 | 7.09E-64 | 7.79E-62 | yes |
| IL15     | 0.578759145 | 18.73661241 | 9.51E-64 | 1.04E-61 | yes |
| TEC      | 0.578691254 | 18.73330779 | 9.92E-64 | 1.08E-61 | yes |
| C1QA     | 0.578531739 | 18.72554566 | 1.09E-63 | 1.18E-61 | yes |
| IKZF1    | 0.577578339 | 18.67921965 | 1.95E-63 | 2.10E-61 | yes |
| CIITA    | 0.577467402 | 18.67383666 | 2.08E-63 | 2.23E-61 | yes |
| TLR1     | 0.576983269 | 18.65036321 | 2.79E-63 | 2.97E-61 | yes |
| FAM26F   | 0.576008659 | 18.60319796 | 5.03E-63 | 5.32E-61 | yes |
| CD53     | 0.57590404  | 18.59814214 | 5.36E-63 | 5.64E-61 | yes |
| GPR31    | 0.575658488 | 18.58628084 | 6.21E-63 | 6.51E-61 | yes |
| ARPC1B   | 0.574971748 | 18.55314812 | 9.39E-63 | 9.78E-61 | yes |
| CD68     | 0.574815014 | 18.54559448 | 1.03E-62 | 1.07E-60 | yes |
| DOCK2    | 0.574680421 | 18.53911033 | 1.12E-62 | 1.15E-60 | yes |
| NCR1     | 0.574540462 | 18.53237007 | 1.22E-62 | 1.25E-60 | yes |
| MYO1F    | 0.574343897 | 18.52290778 | 1.37E-62 | 1.39E-60 | yes |
| NCKAP1L  | 0.574340518 | 18.52274517 | 1.37E-62 | 1.39E-60 | yes |
| GPR65    | 0.573994658 | 18.50610789 | 1.69E-62 | 1.70E-60 | yes |
| OBFC2A   | 0.573153352 | 18.46569927 | 2.79E-62 | 2.80E-60 | yes |
| RNASE6   | 0.572928318 | 18.45490542 | 3.19E-62 | 3.19E-60 | yes |
| TXNDC3   | 0.571681108 | 18.39519506 | 6.69E-62 | 6.67E-60 | yes |

|          |             |             |          |          |     |
|----------|-------------|-------------|----------|----------|-----|
| LILRB1   | 0.571429987 | 18.38319557 | 7.77E-62 | 7.70E-60 | yes |
| TMEM106A | 0.570279486 | 18.32831825 | 1.54E-61 | 1.51E-59 | yes |
| TMEM150B | 0.570096973 | 18.31962734 | 1.71E-61 | 1.68E-59 | yes |
| LYZ      | 0.569977524 | 18.31394157 | 1.83E-61 | 1.79E-59 | yes |
| PIK3CG   | 0.567691851 | 18.20547388 | 7.03E-61 | 6.84E-59 | yes |
| EMR2     | 0.567468284 | 18.1948979  | 8.02E-61 | 7.75E-59 | yes |
| FAM177B  | 0.567147669 | 18.17974135 | 9.67E-61 | 9.31E-59 | yes |
| SIGLEC10 | 0.567073483 | 18.17623607 | 1.01E-60 | 9.68E-59 | yes |
| LRRC25   | 0.567036541 | 18.17449077 | 1.03E-60 | 9.84E-59 | yes |
| GBP5     | 0.566278703 | 18.13872357 | 1.61E-60 | 1.52E-58 | yes |
| DSC2     | 0.565878645 | 18.11986961 | 2.03E-60 | 1.91E-58 | yes |
| C15orf53 | 0.565838189 | 18.11796404 | 2.08E-60 | 1.95E-58 | yes |
| CD1C     | 0.565750089 | 18.11381504 | 2.18E-60 | 2.04E-58 | yes |
| MGAT4A   | 0.56536585  | 18.0957301  | 2.73E-60 | 2.54E-58 | yes |
| SCPEP1   | 0.56508354  | 18.0824537  | 3.22E-60 | 2.98E-58 | yes |
| PLBD1    | 0.565056802 | 18.08119677 | 3.27E-60 | 3.02E-58 | yes |
| DSE      | 0.565020827 | 18.07950574 | 3.34E-60 | 3.07E-58 | yes |
| TRIM38   | 0.563482287 | 18.00732649 | 8.13E-60 | 7.44E-58 | yes |
| ADAP2    | 0.563468412 | 18.00667683 | 8.19E-60 | 7.46E-58 | yes |
| CYBB     | 0.56275014  | 17.97307504 | 1.24E-59 | 1.12E-57 | yes |
| PLB1     | 0.562354148 | 17.95457547 | 1.56E-59 | 1.41E-57 | yes |
| EVI2B    | 0.562049281 | 17.9403453  | 1.86E-59 | 1.67E-57 | yes |
| EMR1     | 0.561910761 | 17.93388318 | 2.01E-59 | 1.80E-57 | yes |
| KCNK6    | 0.561439899 | 17.91193343 | 2.63E-59 | 2.34E-57 | yes |
| ARL11    | 0.560306296 | 17.85919329 | 5.03E-59 | 4.46E-57 | yes |
| TIFAB    | 0.558634031 | 17.78165903 | 1.30E-58 | 1.15E-56 | yes |
| SLC2A9   | 0.558283428 | 17.76544348 | 1.59E-58 | 1.40E-56 | yes |
| ARHGDI1B | 0.558256636 | 17.76420487 | 1.62E-58 | 1.41E-56 | yes |
| SYTL1    | 0.558240259 | 17.76344781 | 1.63E-58 | 1.42E-56 | yes |
| CYTH4    | 0.557728251 | 17.73979453 | 2.18E-58 | 1.89E-56 | yes |
| CCL19    | 0.556515228 | 17.68387346 | 4.33E-58 | 3.74E-56 | yes |
| FYB      | 0.556473209 | 17.68193928 | 4.43E-58 | 3.81E-56 | yes |
| GPSM3    | 0.555883294 | 17.65480593 | 6.17E-58 | 5.29E-56 | yes |
| GIMAP2   | 0.555502694 | 17.63732054 | 7.65E-58 | 6.52E-56 | yes |
| CD84     | 0.555423932 | 17.63370413 | 7.99E-58 | 6.79E-56 | yes |
| ARHGAP9  | 0.555372923 | 17.63136232 | 8.22E-58 | 6.96E-56 | yes |
| ARHGAP25 | 0.554042289 | 17.57037575 | 1.73E-57 | 1.46E-55 | yes |
| PARVG    | 0.554019502 | 17.56933304 | 1.76E-57 | 1.47E-55 | yes |
| TES      | 0.553643676 | 17.55214408 | 2.17E-57 | 1.81E-55 | yes |
| IL4R     | 0.553350545 | 17.53874805 | 2.55E-57 | 2.12E-55 | yes |
| CASP10   | 0.552718124 | 17.50987852 | 3.63E-57 | 3.01E-55 | yes |
| KIAA0125 | 0.552542178 | 17.50185445 | 4.00E-57 | 3.30E-55 | yes |
| ELF4     | 0.552337865 | 17.49254095 | 4.48E-57 | 3.68E-55 | yes |
| CFLAR    | 0.551849676 | 17.47030545 | 5.88E-57 | 4.81E-55 | yes |
| IL12RB1  | 0.551726168 | 17.46468414 | 6.29E-57 | 5.13E-55 | yes |
| C1QB     | 0.551589035 | 17.45844463 | 6.79E-57 | 5.51E-55 | yes |
| CMAH     | 0.550317543 | 17.40068891 | 1.37E-56 | 1.11E-54 | yes |
| MLKL     | 0.550209625 | 17.3957949  | 1.46E-56 | 1.17E-54 | yes |
| VNN1     | 0.548210285 | 17.30535148 | 4.37E-56 | 3.51E-54 | yes |
| FES      | 0.547929397 | 17.29267912 | 5.10E-56 | 4.08E-54 | yes |
| DENND1C  | 0.547850875 | 17.28913809 | 5.33E-56 | 4.24E-54 | yes |

|          |             |             |          |          |     |
|----------|-------------|-------------|----------|----------|-----|
| ICAM3    | 0.547530379 | 17.27469169 | 6.35E-56 | 5.03E-54 | yes |
| NCF4     | 0.54704781  | 17.25296029 | 8.26E-56 | 6.52E-54 | yes |
| HLA-E    | 0.546962916 | 17.24913983 | 8.65E-56 | 6.81E-54 | yes |
| C1QC     | 0.546940689 | 17.24813969 | 8.76E-56 | 6.86E-54 | yes |
| ITGB7    | 0.546795174 | 17.24159323 | 9.48E-56 | 7.40E-54 | yes |
| SPI1     | 0.546665192 | 17.23574747 | 1.02E-55 | 7.91E-54 | yes |
| CLEC7A   | 0.546071947 | 17.20908954 | 1.41E-55 | 1.09E-53 | yes |
| CD72     | 0.545914178 | 17.20200627 | 1.53E-55 | 1.18E-53 | yes |
| SLA      | 0.544647534 | 17.14523279 | 3.05E-55 | 2.34E-53 | yes |
| HLA-DQB2 | 0.544478361 | 17.13766279 | 3.34E-55 | 2.56E-53 | yes |
| FAM78A   | 0.54438102  | 17.13330839 | 3.52E-55 | 2.69E-53 | yes |
| TNFRSF1B | 0.543268155 | 17.08359604 | 6.42E-55 | 4.88E-53 | yes |
| MAN2B1   | 0.543251331 | 17.08284548 | 6.48E-55 | 4.90E-53 | yes |
| SH2D2A   | 0.542786263 | 17.06210931 | 8.32E-55 | 6.28E-53 | yes |
| MSR1     | 0.542651204 | 17.05609156 | 8.95E-55 | 6.73E-53 | yes |
| SOAT1    | 0.541234749 | 16.99309196 | 1.91E-54 | 1.43E-52 | yes |
| SLC02B1  | 0.541064098 | 16.98551576 | 2.10E-54 | 1.56E-52 | yes |
| OSCAR    | 0.540559031 | 16.96311025 | 2.75E-54 | 2.04E-52 | yes |
| TMPRSS13 | 0.540194806 | 16.94696877 | 3.34E-54 | 2.47E-52 | yes |
| GBGT1    | 0.539903619 | 16.93407386 | 3.90E-54 | 2.88E-52 | yes |
| CTSC     | 0.539333843 | 16.90886666 | 5.28E-54 | 3.88E-52 | yes |
| GIMAP7   | 0.539284906 | 16.90670317 | 5.42E-54 | 3.97E-52 | yes |
| GIMAP1   | 0.539184485 | 16.90226442 | 5.71E-54 | 4.17E-52 | yes |
| TMC8     | 0.539052525 | 16.89643309 | 6.13E-54 | 4.46E-52 | yes |
| KLRD1    | 0.538947742 | 16.89180397 | 6.48E-54 | 4.70E-52 | yes |
| MS4A4A   | 0.538251155 | 16.86105812 | 9.38E-54 | 6.77E-52 | yes |
| IL15RA   | 0.53781779  | 16.84195491 | 1.18E-53 | 8.49E-52 | yes |
| NOD2     | 0.537754571 | 16.83916972 | 1.22E-53 | 8.75E-52 | yes |
| CSTA     | 0.536601952 | 16.78845949 | 2.24E-53 | 1.60E-51 | yes |
| CD33     | 0.536583384 | 16.78764366 | 2.26E-53 | 1.61E-51 | yes |
| NAGA     | 0.53555662  | 16.74258358 | 3.89E-53 | 2.76E-51 | yes |
| APOBEC3C | 0.535263879 | 16.72975559 | 4.53E-53 | 3.20E-51 | yes |
| VAV1     | 0.535195322 | 16.72675258 | 4.70E-53 | 3.31E-51 | yes |
| C2       | 0.535097337 | 16.72246141 | 4.95E-53 | 3.47E-51 | yes |
| TNFSF13  | 0.534924962 | 16.71491468 | 5.41E-53 | 3.79E-51 | yes |
| CALHM2   | 0.53464687  | 16.7027457  | 6.26E-53 | 4.37E-51 | yes |
| BIN2     | 0.533887577 | 16.66955861 | 9.32E-53 | 6.47E-51 | yes |
| CLEC10A  | 0.53374174  | 16.66319086 | 1.01E-52 | 6.96E-51 | yes |
| ITGAM    | 0.53281248  | 16.62266482 | 1.63E-52 | 1.13E-50 | yes |
| RAB27A   | 0.532422818 | 16.60569622 | 2.00E-52 | 1.37E-50 | yes |
| SYK      | 0.532016993 | 16.58803948 | 2.47E-52 | 1.69E-50 | yes |
| C3AR1    | 0.531568728 | 16.56855474 | 3.11E-52 | 2.13E-50 | yes |
| DAB2     | 0.530846615 | 16.53720747 | 4.52E-52 | 3.08E-50 | yes |
| PILRA    | 0.530263883 | 16.51194739 | 6.11E-52 | 4.15E-50 | yes |
| APOBEC3G | 0.529632108 | 16.48459815 | 8.47E-52 | 5.72E-50 | yes |
| ARHGAP15 | 0.529617932 | 16.48398491 | 8.53E-52 | 5.75E-50 | yes |
| MS4A14   | 0.529391049 | 16.47417288 | 9.59E-52 | 6.44E-50 | yes |
| LPXN     | 0.52912672  | 16.46274761 | 1.10E-51 | 7.35E-50 | yes |
| SLC7A7   | 0.528564477 | 16.43846755 | 1.47E-51 | 9.78E-50 | yes |
| TBC1D2B  | 0.528285792 | 16.42644383 | 1.69E-51 | 1.12E-49 | yes |
| CD86     | 0.527969394 | 16.41280199 | 1.99E-51 | 1.32E-49 | yes |

|              |              |              |           |           |     |
|--------------|--------------|--------------|-----------|-----------|-----|
| CLEC6A       | 0. 527055645 | 16. 37345774 | 3. 17E-51 | 2. 10E-49 | yes |
| PDCD1LG2     | 0. 526964841 | 16. 36955222 | 3. 32E-51 | 2. 19E-49 | yes |
| LYN          | 0. 526874311 | 16. 36565924 | 3. 48E-51 | 2. 28E-49 | yes |
| TLR5         | 0. 526859545 | 16. 36502435 | 3. 51E-51 | 2. 29E-49 | yes |
| HK3          | 0. 526723556 | 16. 35917818 | 3. 76E-51 | 2. 45E-49 | yes |
| OLFML3       | 0. 526519717 | 16. 35041838 | 4. 17E-51 | 2. 71E-49 | yes |
| IL9R         | 0. 526390472 | 16. 34486622 | 4. 45E-51 | 2. 89E-49 | yes |
| EHBP1L1      | 0. 525931802 | 16. 32517509 | 5. 63E-51 | 3. 63E-49 | yes |
| LILRB3       | 0. 52588273  | 16. 32306958 | 5. 77E-51 | 3. 71E-49 | yes |
| MAP3K8       | 0. 525794457 | 16. 3192826  | 6. 03E-51 | 3. 87E-49 | yes |
| MYO1G        | 0. 525656002 | 16. 31334425 | 6. 47E-51 | 4. 14E-49 | yes |
| LAPTM5       | 0. 525207615 | 16. 29412518 | 8. 13E-51 | 5. 18E-49 | yes |
| STAT5A       | 0. 524984193 | 16. 28455571 | 9. 10E-51 | 5. 79E-49 | yes |
| HLA-DQA2     | 0. 524568704 | 16. 26677209 | 1. 12E-50 | 7. 12E-49 | yes |
| PLA2G2D      | 0. 524400169 | 16. 25956312 | 1. 22E-50 | 7. 73E-49 | yes |
| GRN          | 0. 524322842 | 16. 25625635 | 1. 27E-50 | 8. 01E-49 | yes |
| KYNU         | 0. 523783905 | 16. 23322515 | 1. 67E-50 | 1. 05E-48 | yes |
| C11orf45     | 0. 523536721 | 16. 22267084 | 1. 89E-50 | 1. 18E-48 | yes |
| PIK3AP1      | 0. 523450474 | 16. 2189896  | 1. 98E-50 | 1. 23E-48 | yes |
| C3           | 0. 523333697 | 16. 21400632 | 2. 10E-50 | 1. 30E-48 | yes |
| MGAT1        | 0. 522948846 | 16. 19759236 | 2. 55E-50 | 1. 58E-48 | yes |
| C5orf20      | 0. 522934914 | 16. 19699841 | 2. 56E-50 | 1. 58E-48 | yes |
| CCDC69       | 0. 522644696 | 16. 18462992 | 2. 97E-50 | 1. 83E-48 | yes |
| ASGR2        | 0. 522639934 | 16. 18442702 | 2. 97E-50 | 1. 83E-48 | yes |
| STXBP2       | 0. 522620571 | 16. 18360211 | 3. 00E-50 | 1. 84E-48 | yes |
| SP100        | 0. 522014224 | 16. 1577872  | 4. 07E-50 | 2. 49E-48 | yes |
| IFI30        | 0. 52156555  | 16. 1387068  | 5. 10E-50 | 3. 11E-48 | yes |
| KLHL6        | 0. 521139118 | 16. 12058935 | 6. 32E-50 | 3. 83E-48 | yes |
| PTPN6        | 0. 520834326 | 16. 10765003 | 7. 36E-50 | 4. 45E-48 | yes |
| HLA-DQB1     | 0. 520375441 | 16. 08818498 | 9. 25E-50 | 5. 58E-48 | yes |
| ADPRH        | 0. 519196398 | 16. 03825973 | 1. 66E-49 | 1. 00E-47 | yes |
| TNFAIP8      | 0. 518948621 | 16. 02778386 | 1. 88E-49 | 1. 13E-47 | yes |
| PLCG2        | 0. 518658907 | 16. 01554193 | 2. 17E-49 | 1. 30E-47 | yes |
| TNFSF12-TNFS | 0. 518197939 | 15. 99607917 | 2. 73E-49 | 1. 63E-47 | yes |
| APOBEC3F     | 0. 51748364  | 15. 96595804 | 3. 89E-49 | 2. 31E-47 | yes |
| PTAFR        | 0. 516802787 | 15. 93728971 | 5. 45E-49 | 3. 23E-47 | yes |
| HCK          | 0. 516699723 | 15. 93295364 | 5. 73E-49 | 3. 39E-47 | yes |
| PTPLAD2      | 0. 516458226 | 15. 92279716 | 6. 46E-49 | 3. 81E-47 | yes |
| FRRS1        | 0. 515750088 | 15. 89304537 | 9. 15E-49 | 5. 38E-47 | yes |
| FCGR2A       | 0. 515203853 | 15. 87012614 | 1. 20E-48 | 7. 01E-47 | yes |
| DEF6         | 0. 515107879 | 15. 86610193 | 1. 25E-48 | 7. 33E-47 | yes |
| WAS          | 0. 514779831 | 15. 85235292 | 1. 47E-48 | 8. 59E-47 | yes |
| RNF135       | 0. 5145523   | 15. 84282234 | 1. 65E-48 | 9. 57E-47 | yes |
| MAFB         | 0. 514387299 | 15. 83591374 | 1. 79E-48 | 1. 03E-46 | yes |
| CCR1         | 0. 514240469 | 15. 82976802 | 1. 92E-48 | 1. 11E-46 | yes |
| NCF2         | 0. 514093157 | 15. 82360402 | 2. 06E-48 | 1. 19E-46 | yes |
| RGS18        | 0. 514003064 | 15. 81983516 | 2. 16E-48 | 1. 24E-46 | yes |
| PLXDC2       | 0. 513845379 | 15. 81324049 | 2. 33E-48 | 1. 33E-46 | yes |
| NLRC4        | 0. 513738211 | 15. 80875977 | 2. 45E-48 | 1. 40E-46 | yes |
| CTSZ         | 0. 513724998 | 15. 80820737 | 2. 47E-48 | 1. 41E-46 | yes |
| SAMSN1       | 0. 513667844 | 15. 80581821 | 2. 54E-48 | 1. 44E-46 | yes |



|           |              |              |           |           |     |
|-----------|--------------|--------------|-----------|-----------|-----|
| FXVD5     | 0. 513275738 | 15. 78943513 | 3. 07E-48 | 1. 74E-46 | yes |
| BTK       | 0. 511676369 | 15. 72274849 | 6. 69E-48 | 3. 78E-46 | yes |
| C1S       | 0. 511544937 | 15. 7172782  | 7. 13E-48 | 4. 02E-46 | yes |
| CLIC2     | 0. 511097477 | 15. 69866589 | 8. 86E-48 | 4. 97E-46 | yes |
| CD300C    | 0. 510675483 | 15. 68112867 | 1. 09E-47 | 6. 08E-46 | yes |
| CRLF3     | 0. 510522835 | 15. 67478874 | 1. 17E-47 | 6. 53E-46 | yes |
| CD226     | 0. 510299807 | 15. 66552927 | 1. 30E-47 | 7. 26E-46 | yes |
| LPAR6     | 0. 510181251 | 15. 66060891 | 1. 38E-47 | 7. 66E-46 | yes |
| SLC46A3   | 0. 510053801 | 15. 65532077 | 1. 47E-47 | 8. 12E-46 | yes |
| CMTM7     | 0. 509584563 | 15. 63586323 | 1. 84E-47 | 1. 02E-45 | yes |
| TLR6      | 0. 509400171 | 15. 62822237 | 2. 01E-47 | 1. 11E-45 | yes |
| FCER1G    | 0. 50931873  | 15. 62484852 | 2. 09E-47 | 1. 15E-45 | yes |
| TLR7      | 0. 509316107 | 15. 62473985 | 2. 09E-47 | 1. 15E-45 | yes |
| WIPF1     | 0. 508969375 | 15. 61038224 | 2. 47E-47 | 1. 35E-45 | yes |
| WDFY4     | 0. 508869319 | 15. 60624102 | 2. 59E-47 | 1. 41E-45 | yes |
| SH2B3     | 0. 508745807 | 15. 60113012 | 2. 75E-47 | 1. 50E-45 | yes |
| RNF144B   | 0. 508348663 | 15. 58470517 | 3. 33E-47 | 1. 81E-45 | yes |
| NAAA      | 0. 507991363 | 15. 56993958 | 3. 95E-47 | 2. 14E-45 | yes |
| GPR120    | 0. 507765764 | 15. 56062217 | 4. 41E-47 | 2. 37E-45 | yes |
| TNFRSF11A | 0. 507763508 | 15. 560529   | 4. 41E-47 | 2. 37E-45 | yes |
| IL4I1     | 0. 507617381 | 15. 55449618 | 4. 73E-47 | 2. 54E-45 | yes |
| IL18      | 0. 507417774 | 15. 54625836 | 5. 20E-47 | 2. 78E-45 | yes |
| RASSF5    | 0. 507391538 | 15. 54517584 | 5. 27E-47 | 2. 81E-45 | yes |
| ST14      | 0. 507231099 | 15. 5385573  | 5. 69E-47 | 3. 03E-45 | yes |
| HLA-DOB   | 0. 507214253 | 15. 53786247 | 5. 74E-47 | 3. 04E-45 | yes |
| SLFN5     | 0. 506375998 | 15. 50331863 | 8. 56E-47 | 4. 53E-45 | yes |
| FLI1      | 0. 505863719 | 15. 48223713 | 1. 09E-46 | 5. 76E-45 | yes |
| GALM      | 0. 505731651 | 15. 47680582 | 1. 16E-46 | 6. 12E-45 | yes |
| HHEX      | 0. 504952826 | 15. 4448061  | 1. 68E-46 | 8. 84E-45 | yes |
| MYOF      | 0. 504745584 | 15. 43629962 | 1. 86E-46 | 9. 73E-45 | yes |
| ITPRIPL2  | 0. 504731964 | 15. 43574072 | 1. 87E-46 | 9. 77E-45 | yes |
| GIMAP5    | 0. 504230283 | 15. 41516409 | 2. 37E-46 | 1. 24E-44 | yes |
| FMNL1     | 0. 503041664 | 15. 36649596 | 4. 16E-46 | 2. 16E-44 | yes |
| GNGT2     | 0. 502801935 | 15. 3566944  | 4. 65E-46 | 2. 41E-44 | yes |
| HLA-F     | 0. 501559181 | 15. 30595903 | 8. 34E-46 | 4. 31E-44 | yes |
| CD1E      | 0. 501461779 | 15. 30198796 | 8. 73E-46 | 4. 50E-44 | yes |
| NCF1      | 0. 500796061 | 15. 27486747 | 1. 19E-45 | 6. 14E-44 | yes |
| TIGIT     | 0. 50065875  | 15. 26927813 | 1. 27E-45 | 6. 53E-44 | yes |
| MNDA      | 0. 500441273 | 15. 26042867 | 1. 41E-45 | 7. 21E-44 | yes |
| TYROBP    | 0. 500360448 | 15. 25714075 | 1. 46E-45 | 7. 47E-44 | yes |
| EBI3      | 0. 49987935  | 15. 23758107 | 1. 83E-45 | 9. 32E-44 | yes |
| A2M       | 0. 49910134  | 15. 20598975 | 2. 63E-45 | 1. 34E-43 | yes |
| STAB1     | 0. 49848474  | 15. 18098736 | 3. 50E-45 | 1. 78E-43 | yes |
| CREG1     | 0. 49790821  | 15. 15763748 | 4. 58E-45 | 2. 31E-43 | yes |
| PSD4      | 0. 497719822 | 15. 15001344 | 5. 00E-45 | 2. 52E-43 | yes |
| CD37      | 0. 497590002 | 15. 14476126 | 5. 30E-45 | 2. 67E-43 | yes |
| CD302     | 0. 497271685 | 15. 1318888  | 6. 15E-45 | 3. 08E-43 | yes |
| TBXAS1    | 0. 496394301 | 15. 09645006 | 9. 22E-45 | 4. 61E-43 | yes |
| MOBKL1B   | 0. 49575472  | 15. 07065525 | 1. 24E-44 | 6. 18E-43 | yes |
| CASP1     | 0. 495372259 | 15. 0552458  | 1. 48E-44 | 7. 35E-43 | yes |
| TPK1      | 0. 495130341 | 15. 04550489 | 1. 65E-44 | 8. 19E-43 | yes |

|           |             |             |          |          |     |
|-----------|-------------|-------------|----------|----------|-----|
| CCRL2     | 0.495075846 | 15.04331125 | 1.69E-44 | 8.38E-43 | yes |
| OSTF1     | 0.494772458 | 15.03110306 | 1.94E-44 | 9.61E-43 | yes |
| RAP2B     | 0.494564816 | 15.02275186 | 2.14E-44 | 1.05E-42 | yes |
| NBEAL2    | 0.494373869 | 15.0150751  | 2.33E-44 | 1.15E-42 | yes |
| LSP1      | 0.494311551 | 15.0125703  | 2.40E-44 | 1.18E-42 | yes |
| GIMAP8    | 0.493897166 | 14.99592249 | 2.90E-44 | 1.42E-42 | yes |
| LACTB     | 0.493807432 | 14.99231923 | 3.02E-44 | 1.48E-42 | yes |
| MR1       | 0.493746079 | 14.98985597 | 3.11E-44 | 1.51E-42 | yes |
| HLA-DPB2  | 0.493539499 | 14.98156414 | 3.42E-44 | 1.66E-42 | yes |
| ANTXR2    | 0.493531565 | 14.98124575 | 3.43E-44 | 1.66E-42 | yes |
| DPEP2     | 0.493311073 | 14.97239938 | 3.79E-44 | 1.83E-42 | yes |
| CD300LF   | 0.493260844 | 14.97038468 | 3.88E-44 | 1.87E-42 | yes |
| NCF1B     | 0.492305942 | 14.93212071 | 6.00E-44 | 2.89E-42 | yes |
| CD80      | 0.492173028 | 14.92680035 | 6.37E-44 | 3.06E-42 | yes |
| TCIRG1    | 0.492145844 | 14.92571239 | 6.45E-44 | 3.09E-42 | yes |
| C11orf21  | 0.492043339 | 14.92161043 | 6.76E-44 | 3.23E-42 | yes |
| VNN2      | 0.491807159 | 14.91216224 | 7.52E-44 | 3.59E-42 | yes |
| SLC37A2   | 0.491786926 | 14.91135305 | 7.59E-44 | 3.61E-42 | yes |
| SCIN      | 0.491767415 | 14.91057276 | 7.66E-44 | 3.63E-42 | yes |
| CYBA      | 0.491703531 | 14.90801807 | 7.88E-44 | 3.73E-42 | yes |
| HMHA1     | 0.491048097 | 14.88182606 | 1.06E-43 | 5.01E-42 | yes |
| HAVCR2    | 0.4902387   | 14.84952739 | 1.53E-43 | 7.21E-42 | yes |
| IL21R     | 0.489981207 | 14.83926285 | 1.72E-43 | 8.08E-42 | yes |
| CASP4     | 0.489591627 | 14.82374256 | 2.05E-43 | 9.61E-42 | yes |
| FUCA1     | 0.489118152 | 14.8048958  | 2.54E-43 | 1.19E-41 | yes |
| TNFRSF10A | 0.489010787 | 14.80062449 | 2.66E-43 | 1.24E-41 | yes |
| CD40      | 0.488684496 | 14.78764909 | 3.08E-43 | 1.44E-41 | yes |
| SQRDL     | 0.488414062 | 14.77690112 | 3.48E-43 | 1.62E-41 | yes |
| CFI       | 0.488281735 | 14.77164401 | 3.69E-43 | 1.71E-41 | yes |
| CASS4     | 0.488211973 | 14.76887302 | 3.81E-43 | 1.76E-41 | yes |
| HLA-DRB6  | 0.487622156 | 14.74546013 | 4.97E-43 | 2.29E-41 | yes |
| TYMP      | 0.487381665 | 14.73592141 | 5.53E-43 | 2.55E-41 | yes |
| ASCL2     | 0.487253737 | 14.73084911 | 5.86E-43 | 2.69E-41 | yes |
| ARHGAP18  | 0.48709658  | 14.72461961 | 6.28E-43 | 2.88E-41 | yes |
| IKBKE     | 0.486786356 | 14.71232823 | 7.22E-43 | 3.30E-41 | yes |
| C1orf38   | 0.486607195 | 14.70523302 | 7.82E-43 | 3.57E-41 | yes |
| PTPN18    | 0.485818963 | 14.67404598 | 1.11E-42 | 5.06E-41 | yes |
| GPR160    | 0.485370695 | 14.65633079 | 1.36E-42 | 6.16E-41 | yes |
| GCNT1     | 0.484946046 | 14.63956295 | 1.64E-42 | 7.43E-41 | yes |
| VDR       | 0.484666208 | 14.62852057 | 1.85E-42 | 8.39E-41 | yes |
| ARHGAP4   | 0.484627058 | 14.62697619 | 1.89E-42 | 8.52E-41 | yes |
| IL12B     | 0.484275474 | 14.61311208 | 2.21E-42 | 9.93E-41 | yes |
| C17orf60  | 0.483680566 | 14.58967396 | 2.87E-42 | 1.29E-40 | yes |
| PIK3R6    | 0.483667563 | 14.58916196 | 2.89E-42 | 1.29E-40 | yes |
| SLC12A3   | 0.483579405 | 14.58569106 | 3.00E-42 | 1.34E-40 | yes |
| VENTX     | 0.483560457 | 14.58494513 | 3.03E-42 | 1.35E-40 | yes |
| C1orf162  | 0.483277861 | 14.57382324 | 3.43E-42 | 1.53E-40 | yes |
| PLXND1    | 0.483067753 | 14.56555802 | 3.76E-42 | 1.67E-40 | yes |
| IRF5      | 0.482645233 | 14.54894693 | 4.53E-42 | 2.01E-40 | yes |
| RNF149    | 0.482618024 | 14.54787768 | 4.59E-42 | 2.03E-40 | yes |
| PLEKH02   | 0.482472787 | 14.54217112 | 4.89E-42 | 2.16E-40 | yes |

|           |             |             |          |          |     |
|-----------|-------------|-------------|----------|----------|-----|
| RGS19     | 0.482429499 | 14.5404706  | 4.98E-42 | 2.20E-40 | yes |
| SERPINB1  | 0.482168498 | 14.53022031 | 5.59E-42 | 2.46E-40 | yes |
| CASP5     | 0.48150694  | 14.50426151 | 7.48E-42 | 3.28E-40 | yes |
| ACRBP     | 0.481296802 | 14.49602267 | 8.20E-42 | 3.59E-40 | yes |
| TNFRSF14  | 0.481045616 | 14.48617876 | 9.15E-42 | 4.00E-40 | yes |
| GNA15     | 0.480888015 | 14.48000478 | 9.81E-42 | 4.27E-40 | yes |
| C14orf72  | 0.480510003 | 14.46520371 | 1.16E-41 | 5.03E-40 | yes |
| RBMS1     | 0.479892906 | 14.44106377 | 1.52E-41 | 6.58E-40 | yes |
| SIGLEC9   | 0.479407024 | 14.42207638 | 1.87E-41 | 8.11E-40 | yes |
| HCST      | 0.47937958  | 14.42100443 | 1.90E-41 | 8.19E-40 | yes |
| PLA2G15   | 0.478856404 | 14.40057997 | 2.38E-41 | 1.03E-39 | yes |
| C19orf35  | 0.478831349 | 14.39960231 | 2.41E-41 | 1.04E-39 | yes |
| RPGRIP1   | 0.477373253 | 14.34278667 | 4.53E-41 | 1.95E-39 | yes |
| CD244     | 0.476653886 | 14.31481266 | 6.19E-41 | 2.65E-39 | yes |
| STEAP4    | 0.476555619 | 14.31099424 | 6.46E-41 | 2.76E-39 | yes |
| DNASE1L1  | 0.47647642  | 14.30791728 | 6.68E-41 | 2.85E-39 | yes |
| TRPV2     | 0.475905414 | 14.28574636 | 8.55E-41 | 3.64E-39 | yes |
| GIPC2     | 0.475885935 | 14.28499044 | 8.62E-41 | 3.66E-39 | yes |
| SPATC1    | 0.475829326 | 14.28279379 | 8.83E-41 | 3.74E-39 | yes |
| CLEC4A    | 0.475730998 | 14.27897882 | 9.21E-41 | 3.90E-39 | yes |
| POU2F2    | 0.475455933 | 14.26831042 | 1.04E-40 | 4.38E-39 | yes |
| TNFSF15   | 0.475268349 | 14.26103806 | 1.12E-40 | 4.73E-39 | yes |
| RASAL3    | 0.475032258 | 14.25188874 | 1.24E-40 | 5.23E-39 | yes |
| B2M       | 0.474643207 | 14.23682038 | 1.47E-40 | 6.17E-39 | yes |
| FAM129A   | 0.474448314 | 14.22927599 | 1.60E-40 | 6.69E-39 | yes |
| RPS6KA1   | 0.474352461 | 14.22556647 | 1.67E-40 | 6.96E-39 | yes |
| SIPA1     | 0.474066756 | 14.2145136  | 1.88E-40 | 7.85E-39 | yes |
| SNAP23    | 0.473361163 | 14.18724152 | 2.55E-40 | 1.06E-38 | yes |
| TREML2    | 0.473342549 | 14.18652254 | 2.57E-40 | 1.07E-38 | yes |
| FGD2      | 0.473115627 | 14.17775948 | 2.83E-40 | 1.17E-38 | yes |
| FCGR2B    | 0.472399858 | 14.15014245 | 3.84E-40 | 1.59E-38 | yes |
| HSPA7     | 0.472207769 | 14.1427371  | 4.16E-40 | 1.72E-38 | yes |
| CEACAM4   | 0.47216386  | 14.14104467 | 4.24E-40 | 1.74E-38 | yes |
| OLFML2B   | 0.47216202  | 14.14097376 | 4.25E-40 | 1.74E-38 | yes |
| SFT2D2    | 0.471934601 | 14.13221043 | 4.68E-40 | 1.92E-38 | yes |
| ARHGAP27  | 0.471780092 | 14.12625868 | 4.99E-40 | 2.04E-38 | yes |
| APOL3     | 0.471532312 | 14.11671761 | 5.55E-40 | 2.27E-38 | yes |
| PDE6G     | 0.471245966 | 14.10569682 | 6.27E-40 | 2.55E-38 | yes |
| RASSF3    | 0.471152102 | 14.10208545 | 6.52E-40 | 2.65E-38 | yes |
| LILRB4    | 0.47098952  | 14.09583168 | 6.99E-40 | 2.84E-38 | yes |
| RAB43     | 0.470562627 | 14.07941989 | 8.37E-40 | 3.39E-38 | yes |
| SLC15A3   | 0.470249808 | 14.0674017  | 9.56E-40 | 3.86E-38 | yes |
| VSIG4     | 0.47005591  | 14.05995576 | 1.04E-39 | 4.19E-38 | yes |
| TPM3      | 0.469964572 | 14.05644916 | 1.08E-39 | 4.34E-38 | yes |
| TMPRSS11D | 0.469939978 | 14.05550505 | 1.09E-39 | 4.38E-38 | yes |
| CEACAM21  | 0.469934684 | 14.05530182 | 1.09E-39 | 4.38E-38 | yes |
| CARD6     | 0.469793435 | 14.0498805  | 1.16E-39 | 4.64E-38 | yes |
| ITGA4     | 0.469781005 | 14.04940348 | 1.16E-39 | 4.65E-38 | yes |
| IL1R1     | 0.469623304 | 14.04335251 | 1.25E-39 | 4.97E-38 | yes |
| ADPGK     | 0.469529853 | 14.0397676  | 1.30E-39 | 5.15E-38 | yes |
| RASGRP4   | 0.4690925   | 14.02299816 | 1.56E-39 | 6.19E-38 | yes |

|              |             |             |          |          |     |
|--------------|-------------|-------------|----------|----------|-----|
| CXorf65      | 0.468522154 | 14.00114929 | 1.98E-39 | 7.85E-38 | yes |
| C1orf127     | 0.468273948 | 13.99164799 | 2.20E-39 | 8.70E-38 | yes |
| CD2AP        | 0.467664555 | 13.96833847 | 2.84E-39 | 1.12E-37 | yes |
| ACSL1        | 0.467351245 | 13.95636414 | 3.24E-39 | 1.28E-37 | yes |
| MEI1         | 0.467050918 | 13.94489237 | 3.67E-39 | 1.44E-37 | yes |
| SERPING1     | 0.466403253 | 13.92017405 | 4.81E-39 | 1.89E-37 | yes |
| NFKB1        | 0.466375671 | 13.91912201 | 4.87E-39 | 1.91E-37 | yes |
| SP140L       | 0.465806685 | 13.89743118 | 6.17E-39 | 2.41E-37 | yes |
| DENND3       | 0.465376249 | 13.88103681 | 7.38E-39 | 2.88E-37 | yes |
| TNFSF10      | 0.464637756 | 13.85293841 | 1.00E-38 | 3.91E-37 | yes |
| FKBP15       | 0.464391147 | 13.84356358 | 1.11E-38 | 4.32E-37 | yes |
| NUDT16P1     | 0.464335562 | 13.84145109 | 1.14E-38 | 4.41E-37 | yes |
| STAC3        | 0.46426054  | 13.83860023 | 1.17E-38 | 4.55E-37 | yes |
| SERPINA1     | 0.463967476 | 13.82746734 | 1.33E-38 | 5.12E-37 | yes |
| IL6R         | 0.463737333 | 13.81872876 | 1.46E-38 | 5.62E-37 | yes |
| IL10         | 0.4636796   | 13.8165372  | 1.49E-38 | 5.75E-37 | yes |
| C1RL         | 0.463581829 | 13.81282625 | 1.55E-38 | 5.98E-37 | yes |
| FGR          | 0.463483353 | 13.80908919 | 1.62E-38 | 6.21E-37 | yes |
| TICAM2       | 0.463375806 | 13.80500866 | 1.69E-38 | 6.48E-37 | yes |
| MPEG1        | 0.463192001 | 13.79803654 | 1.83E-38 | 6.98E-37 | yes |
| C1orf85      | 0.463083859 | 13.79393558 | 1.91E-38 | 7.29E-37 | yes |
| C12orf35     | 0.46297729  | 13.789895   | 2.00E-38 | 7.60E-37 | yes |
| BANK1        | 0.462539764 | 13.77331414 | 2.39E-38 | 9.08E-37 | yes |
| MYD88        | 0.46225825  | 13.76265241 | 2.68E-38 | 1.02E-36 | yes |
| IL13RA1      | 0.461931233 | 13.75027402 | 3.07E-38 | 1.16E-36 | yes |
| CD19         | 0.460744728 | 13.70542163 | 5.00E-38 | 1.89E-36 | yes |
| IDO2         | 0.460236816 | 13.68625002 | 6.16E-38 | 2.32E-36 | yes |
| SIGLECP3     | 0.459872994 | 13.67252769 | 7.14E-38 | 2.69E-36 | yes |
| LOC100233209 | 0.459850355 | 13.67167413 | 7.21E-38 | 2.71E-36 | yes |
| CTSB         | 0.459770364 | 13.66865839 | 7.45E-38 | 2.79E-36 | yes |
| DOCK8        | 0.459516519 | 13.65909096 | 8.26E-38 | 3.09E-36 | yes |
| KLHDC7B      | 0.45943183  | 13.6559     | 8.55E-38 | 3.20E-36 | yes |
| GAB3         | 0.458818576 | 13.63280738 | 1.10E-37 | 4.10E-36 | yes |
| BTN2A2       | 0.457783238 | 13.59387681 | 1.67E-37 | 6.23E-36 | yes |
| ROD1         | 0.45772707  | 13.5917668  | 1.71E-37 | 6.36E-36 | yes |
| VAMP8        | 0.457693012 | 13.59048747 | 1.74E-37 | 6.44E-36 | yes |
| CD69         | 0.457101954 | 13.5682975  | 2.20E-37 | 8.16E-36 | yes |
| GMIP         | 0.455785432 | 13.51895316 | 3.75E-37 | 1.39E-35 | yes |
| MYH9         | 0.455715024 | 13.51631735 | 3.86E-37 | 1.42E-35 | yes |
| C1R          | 0.454724737 | 13.47927892 | 5.75E-37 | 2.12E-35 | yes |
| NCR3         | 0.454646924 | 13.47637125 | 5.93E-37 | 2.18E-35 | yes |
| GCH1         | 0.454525031 | 13.4718172  | 6.23E-37 | 2.29E-35 | yes |
| TRANK1       | 0.454124161 | 13.45684706 | 7.32E-37 | 2.68E-35 | yes |
| UNC93B1      | 0.453778909 | 13.44396216 | 8.41E-37 | 3.07E-35 | yes |
| CSF3R        | 0.453537659 | 13.43496315 | 9.26E-37 | 3.38E-35 | yes |
| MBNL1        | 0.453250806 | 13.42426794 | 1.04E-36 | 3.78E-35 | yes |
| TRPM2        | 0.453187394 | 13.42190435 | 1.06E-36 | 3.87E-35 | yes |
| GMFG         | 0.452993529 | 13.41467994 | 1.15E-36 | 4.18E-35 | yes |
| ANKRD58      | 0.452824984 | 13.40840099 | 1.23E-36 | 4.46E-35 | yes |
| TMEM37       | 0.45265683  | 13.40213846 | 1.32E-36 | 4.76E-35 | yes |
| RUNX1        | 0.452520099 | 13.39704751 | 1.39E-36 | 5.02E-35 | yes |

|           |             |             |          |          |     |
|-----------|-------------|-------------|----------|----------|-----|
| TMEM86A   | 0.451926353 | 13.37495413 | 1.76E-36 | 6.35E-35 | yes |
| C9orf167  | 0.451906013 | 13.3741977  | 1.78E-36 | 6.39E-35 | yes |
| IRF8      | 0.451780545 | 13.36953205 | 1.87E-36 | 6.70E-35 | yes |
| CD93      | 0.451634012 | 13.36408431 | 1.98E-36 | 7.09E-35 | yes |
| CEBPA     | 0.451114415 | 13.34477798 | 2.43E-36 | 8.70E-35 | yes |
| EDEM1     | 0.450847401 | 13.33486334 | 2.70E-36 | 9.66E-35 | yes |
| RBM47     | 0.450827247 | 13.33411519 | 2.73E-36 | 9.71E-35 | yes |
| CMTM6     | 0.450824039 | 13.33399609 | 2.73E-36 | 9.71E-35 | yes |
| MACC1     | 0.450702831 | 13.32949712 | 2.86E-36 | 1.02E-34 | yes |
| VASP      | 0.449848802 | 13.29782364 | 4.01E-36 | 1.42E-34 | yes |
| CD14      | 0.449780384 | 13.2952882  | 4.12E-36 | 1.46E-34 | yes |
| GAL3ST4   | 0.449693984 | 13.29208676 | 4.27E-36 | 1.51E-34 | yes |
| ST8SIA4   | 0.449173178 | 13.27279907 | 5.24E-36 | 1.85E-34 | yes |
| LOC115110 | 0.448714138 | 13.25581291 | 6.28E-36 | 2.21E-34 | yes |
| AIF1      | 0.448366363 | 13.24295269 | 7.20E-36 | 2.53E-34 | yes |
| RUNX2     | 0.448345972 | 13.2421989  | 7.26E-36 | 2.55E-34 | yes |
| GLT25D1   | 0.448320818 | 13.24126907 | 7.33E-36 | 2.57E-34 | yes |
| NCF1C     | 0.447977781 | 13.2285924  | 8.39E-36 | 2.94E-34 | yes |
| TRIM34    | 0.447691816 | 13.21803037 | 9.39E-36 | 3.28E-34 | yes |
| PRKCH     | 0.447667601 | 13.21713625 | 9.48E-36 | 3.30E-34 | yes |
| PLTP      | 0.447155738 | 13.19824417 | 1.16E-35 | 4.03E-34 | yes |
| LY96      | 0.446799446 | 13.18510354 | 1.33E-35 | 4.63E-34 | yes |
| MAN1A1    | 0.446761634 | 13.18370945 | 1.35E-35 | 4.69E-34 | yes |
| P2RX4     | 0.446742952 | 13.18302068 | 1.36E-35 | 4.71E-34 | yes |
| ZNRF2     | 0.446550695 | 13.17593387 | 1.47E-35 | 5.07E-34 | yes |
| GPBAR1    | 0.446447038 | 13.17211391 | 1.53E-35 | 5.27E-34 | yes |
| TMEM109   | 0.446104974 | 13.15951285 | 1.75E-35 | 6.02E-34 | yes |
| RILPL2    | 0.445690948 | 13.14427045 | 2.05E-35 | 7.06E-34 | yes |
| MCOLN2    | 0.445152227 | 13.12445316 | 2.53E-35 | 8.70E-34 | yes |
| GPR174    | 0.44494804  | 13.11694664 | 2.74E-35 | 9.40E-34 | yes |
| MANBA     | 0.444788716 | 13.11109116 | 2.92E-35 | 9.98E-34 | yes |
| ALDH3B1   | 0.444716267 | 13.10842904 | 3.00E-35 | 1.02E-33 | yes |
| GPRIN3    | 0.444695523 | 13.10766688 | 3.03E-35 | 1.03E-33 | yes |
| HLA-DRB5  | 0.444349855 | 13.09497021 | 3.46E-35 | 1.18E-33 | yes |
| PYCARD    | 0.444260189 | 13.09167789 | 3.58E-35 | 1.22E-33 | yes |
| C1orf200  | 0.444095758 | 13.08564167 | 3.82E-35 | 1.30E-33 | yes |
| NAIP      | 0.444016908 | 13.0827477  | 3.94E-35 | 1.33E-33 | yes |
| NPC2      | 0.443881134 | 13.07776537 | 4.15E-35 | 1.40E-33 | yes |
| CREBL2    | 0.443613427 | 13.0679449  | 4.60E-35 | 1.55E-33 | yes |
| SNX9      | 0.443542581 | 13.06534677 | 4.73E-35 | 1.59E-33 | yes |
| CAST      | 0.443168982 | 13.05165068 | 5.47E-35 | 1.84E-33 | yes |
| PTPN2     | 0.442964895 | 13.04417248 | 5.92E-35 | 1.99E-33 | yes |
| C3orf64   | 0.442470877 | 13.02608098 | 7.16E-35 | 2.40E-33 | yes |
| IL10RB    | 0.442192788 | 13.01590354 | 7.97E-35 | 2.67E-33 | yes |
| IRAK3     | 0.442148534 | 13.01428437 | 8.11E-35 | 2.71E-33 | yes |
| KCNE3     | 0.442000138 | 13.00885574 | 8.58E-35 | 2.86E-33 | yes |
| LAP3      | 0.441944887 | 13.00683486 | 8.77E-35 | 2.92E-33 | yes |
| ITGB1     | 0.441690503 | 12.99753286 | 9.67E-35 | 3.21E-33 | yes |
| CD180     | 0.441686683 | 12.9973932  | 9.68E-35 | 3.21E-33 | yes |
| XCL1      | 0.441600515 | 12.99424323 | 1.00E-34 | 3.32E-33 | yes |
| CPVL      | 0.441377631 | 12.98609747 | 1.09E-34 | 3.61E-33 | yes |

|          |             |             |          |          |     |
|----------|-------------|-------------|----------|----------|-----|
| MYL12A   | 0.44118802  | 12.97917012 | 1.17E-34 | 3.87E-33 | yes |
| KCTD12   | 0.441114764 | 12.97649431 | 1.21E-34 | 3.98E-33 | yes |
| ENG      | 0.440603975 | 12.9578458  | 1.47E-34 | 4.83E-33 | yes |
| ABI3     | 0.440536615 | 12.95538769 | 1.51E-34 | 4.95E-33 | yes |
| ZDHHC5   | 0.440197428 | 12.94301427 | 1.71E-34 | 5.63E-33 | yes |
| ISG20    | 0.440149045 | 12.94124981 | 1.75E-34 | 5.72E-33 | yes |
| S100A11  | 0.440121823 | 12.94025712 | 1.77E-34 | 5.77E-33 | yes |
| CXCL16   | 0.439666819 | 12.92367156 | 2.10E-34 | 6.86E-33 | yes |
| ELK3     | 0.439570027 | 12.92014495 | 2.18E-34 | 7.11E-33 | yes |
| MAN2A1   | 0.439256019 | 12.90870789 | 2.46E-34 | 8.00E-33 | yes |
| LRRFIP1  | 0.438870415 | 12.89467111 | 2.85E-34 | 9.25E-33 | yes |
| DPYD     | 0.438697817 | 12.88839106 | 3.04E-34 | 9.87E-33 | yes |
| ATP8B4   | 0.438537729 | 12.88256776 | 3.23E-34 | 1.05E-32 | yes |
| RREB1    | 0.437169041 | 12.83284273 | 5.43E-34 | 1.76E-32 | yes |
| FAM114A1 | 0.437158965 | 12.83247708 | 5.46E-34 | 1.76E-32 | yes |
| GZMM     | 0.436987807 | 12.82626671 | 5.82E-34 | 1.88E-32 | yes |
| TRIM22   | 0.43688715  | 12.82261525 | 6.05E-34 | 1.95E-32 | yes |
| LITAF    | 0.436587804 | 12.81175953 | 6.77E-34 | 2.18E-32 | yes |
| CAPZA1   | 0.436341635 | 12.80283626 | 7.43E-34 | 2.39E-32 | yes |
| LILRA6   | 0.436316822 | 12.80193701 | 7.50E-34 | 2.40E-32 | yes |
| ZNF217   | 0.436303184 | 12.80144275 | 7.54E-34 | 2.41E-32 | yes |
| SYNGR2   | 0.435947472 | 12.78855576 | 8.63E-34 | 2.75E-32 | yes |
| CORO1A   | 0.435808735 | 12.78353147 | 9.09E-34 | 2.90E-32 | yes |
| B4GALT1  | 0.435456342 | 12.77077484 | 1.04E-33 | 3.31E-32 | yes |
| LGMN     | 0.435302043 | 12.76519152 | 1.10E-33 | 3.50E-32 | yes |
| STX11    | 0.433952347 | 12.71641154 | 1.83E-33 | 5.80E-32 | yes |
| HSH2D    | 0.433792708 | 12.71064892 | 1.94E-33 | 6.15E-32 | yes |
| SLC11A1  | 0.432826988 | 12.67582009 | 2.78E-33 | 8.81E-32 | yes |
| CTBS     | 0.432564459 | 12.66636122 | 3.07E-33 | 9.70E-32 | yes |
| TMEM173  | 0.432237855 | 12.65459928 | 3.47E-33 | 1.09E-31 | yes |
| CYP2S1   | 0.431645134 | 12.63326937 | 4.32E-33 | 1.36E-31 | yes |
| PRKCD    | 0.431511633 | 12.62846793 | 4.54E-33 | 1.43E-31 | yes |
| CLEC4C   | 0.431481659 | 12.62739003 | 4.60E-33 | 1.44E-31 | yes |
| ADORA3   | 0.431075808 | 12.6128003  | 5.34E-33 | 1.67E-31 | yes |
| PRDM1    | 0.430886911 | 12.60601295 | 5.73E-33 | 1.79E-31 | yes |
| FCN1     | 0.430824625 | 12.60377533 | 5.87E-33 | 1.83E-31 | yes |
| RGL4     | 0.430344646 | 12.58653983 | 7.01E-33 | 2.19E-31 | yes |
| ABHD15   | 0.430221375 | 12.58211539 | 7.34E-33 | 2.29E-31 | yes |
| LOC96610 | 0.430116245 | 12.5783428  | 7.63E-33 | 2.37E-31 | yes |
| SIGLEC7  | 0.430037455 | 12.57551581 | 7.85E-33 | 2.44E-31 | yes |
| SLC10A3  | 0.429926024 | 12.57151826 | 8.18E-33 | 2.54E-31 | yes |
| IFNGR2   | 0.429486656 | 12.55576294 | 9.63E-33 | 2.98E-31 | yes |
| AIM1     | 0.429322358 | 12.5498742  | 1.02E-32 | 3.16E-31 | yes |
| IQGAP1   | 0.42916361  | 12.54418581 | 1.08E-32 | 3.35E-31 | yes |
| MYO7A    | 0.429007323 | 12.538587   | 1.15E-32 | 3.54E-31 | yes |
| TMEM140  | 0.42899967  | 12.53831288 | 1.15E-32 | 3.55E-31 | yes |
| REEP4    | 0.427781273 | 12.49471294 | 1.80E-32 | 5.54E-31 | yes |
| UCP2     | 0.427439861 | 12.4825106  | 2.04E-32 | 6.27E-31 | yes |
| WIPI1    | 0.427048065 | 12.46851557 | 2.36E-32 | 7.23E-31 | yes |
| CARD11   | 0.426983788 | 12.4662204  | 2.42E-32 | 7.39E-31 | yes |
| PQLC3    | 0.426767456 | 12.45849741 | 2.62E-32 | 7.99E-31 | yes |

|           |             |             |          |          |     |
|-----------|-------------|-------------|----------|----------|-----|
| NRP1      | 0.426743496 | 12.4576422  | 2.64E-32 | 8.05E-31 | yes |
| HFE       | 0.426469901 | 12.44787908 | 2.92E-32 | 8.88E-31 | yes |
| B3GNT8    | 0.426435988 | 12.4466692  | 2.95E-32 | 8.98E-31 | yes |
| NLRP1     | 0.426038072 | 12.43247793 | 3.42E-32 | 1.04E-30 | yes |
| KCNQ1     | 0.425969724 | 12.43004123 | 3.50E-32 | 1.06E-30 | yes |
| HEXA      | 0.425933407 | 12.4287466  | 3.55E-32 | 1.07E-30 | yes |
| ACPP      | 0.425739955 | 12.42185166 | 3.81E-32 | 1.15E-30 | yes |
| SEC24D    | 0.425574145 | 12.41594356 | 4.04E-32 | 1.22E-30 | yes |
| TM6SF1    | 0.425509699 | 12.41364763 | 4.14E-32 | 1.25E-30 | yes |
| NFATC2    | 0.425504081 | 12.41344752 | 4.15E-32 | 1.25E-30 | yes |
| BTN3A2    | 0.42502869  | 12.3965188  | 4.93E-32 | 1.48E-30 | yes |
| INPP5D    | 0.424763366 | 12.38707608 | 5.43E-32 | 1.63E-30 | yes |
| ST3GAL1   | 0.424701215 | 12.38486472 | 5.56E-32 | 1.66E-30 | yes |
| TNFAIP8L2 | 0.424371915 | 12.37315163 | 6.26E-32 | 1.87E-30 | yes |
| FTL       | 0.424168247 | 12.36591022 | 6.74E-32 | 2.01E-30 | yes |
| TGFBR1    | 0.423903192 | 12.35648965 | 7.43E-32 | 2.21E-30 | yes |
| PRSS36    | 0.423823996 | 12.35367561 | 7.64E-32 | 2.28E-30 | yes |
| ACSL5     | 0.423749756 | 12.35103799 | 7.85E-32 | 2.33E-30 | yes |
| MBD2      | 0.423702202 | 12.34934865 | 7.99E-32 | 2.37E-30 | yes |
| IGSF6     | 0.423512058 | 12.34259504 | 8.56E-32 | 2.54E-30 | yes |
| ADAMDEC1  | 0.423337618 | 12.33640094 | 9.11E-32 | 2.70E-30 | yes |
| HPS3      | 0.423254623 | 12.33345452 | 9.39E-32 | 2.78E-30 | yes |
| LRG1      | 0.42309209  | 12.32768549 | 9.96E-32 | 2.94E-30 | yes |
| IL17RA    | 0.423023688 | 12.32525802 | 1.02E-31 | 3.01E-30 | yes |
| STAT6     | 0.422840606 | 12.31876203 | 1.09E-31 | 3.21E-30 | yes |
| PLCB2     | 0.422687258 | 12.31332247 | 1.15E-31 | 3.39E-30 | yes |
| SLC24A6   | 0.422525531 | 12.30758707 | 1.22E-31 | 3.59E-30 | yes |
| C8orf80   | 0.422323247 | 12.30041537 | 1.31E-31 | 3.85E-30 | yes |
| BTN3A1    | 0.422070446 | 12.29145584 | 1.44E-31 | 4.21E-30 | yes |
| FCGRT     | 0.421708257 | 12.27862553 | 1.64E-31 | 4.79E-30 | yes |
| RHBDF2    | 0.421166663 | 12.2594533  | 1.99E-31 | 5.82E-30 | yes |
| ELF1      | 0.421010711 | 12.25393559 | 2.11E-31 | 6.14E-30 | yes |
| DTX2      | 0.420510705 | 12.23625392 | 2.52E-31 | 7.34E-30 | yes |
| SLC2A5    | 0.420408332 | 12.2326354  | 2.62E-31 | 7.60E-30 | yes |
| SMPDL3A   | 0.419961436 | 12.21684578 | 3.07E-31 | 8.91E-30 | yes |
| LGALS9    | 0.419561    | 12.20270685 | 3.54E-31 | 1.03E-29 | yes |
| CXCL10    | 0.419146353 | 12.18807529 | 4.11E-31 | 1.19E-29 | yes |
| TNFAIP3   | 0.419040339 | 12.18433586 | 4.27E-31 | 1.23E-29 | yes |
| FAM91A1   | 0.418835163 | 12.17710044 | 4.59E-31 | 1.32E-29 | yes |
| CARD16    | 0.418144063 | 12.15274577 | 5.87E-31 | 1.69E-29 | yes |
| SPATS2L   | 0.418064361 | 12.14993869 | 6.04E-31 | 1.74E-29 | yes |
| TGFB1     | 0.418001135 | 12.14771215 | 6.18E-31 | 1.77E-29 | yes |
| FHOD1     | 0.417792799 | 12.1403769  | 6.65E-31 | 1.91E-29 | yes |
| ARRDC5    | 0.41777938  | 12.13990453 | 6.68E-31 | 1.91E-29 | yes |
| TPRG1     | 0.417729605 | 12.13815238 | 6.80E-31 | 1.95E-29 | yes |
| MYO1C     | 0.417522349 | 12.13085818 | 7.32E-31 | 2.09E-29 | yes |
| DPRXP4    | 0.417322474 | 12.12382592 | 7.86E-31 | 2.24E-29 | yes |
| SRPR      | 0.417196793 | 12.11940515 | 8.22E-31 | 2.34E-29 | yes |
| CXCR4     | 0.416893874 | 12.10875353 | 9.15E-31 | 2.60E-29 | yes |
| CARD9     | 0.416730026 | 12.10299413 | 9.69E-31 | 2.75E-29 | yes |
| NLRP12    | 0.416673449 | 12.10100574 | 9.89E-31 | 2.80E-29 | yes |

|          |             |             |          |          |     |
|----------|-------------|-------------|----------|----------|-----|
| SUMF1    | 0.416616415 | 12.09900147 | 1.01E-30 | 2.86E-29 | yes |
| VRK2     | 0.416440256 | 12.092812   | 1.07E-30 | 3.04E-29 | yes |
| MBD4     | 0.416380102 | 12.09069883 | 1.10E-30 | 3.10E-29 | yes |
| IL22RA2  | 0.416359701 | 12.08998218 | 1.11E-30 | 3.12E-29 | yes |
| CAPG     | 0.416074269 | 12.07995805 | 1.22E-30 | 3.44E-29 | yes |
| GPR183   | 0.415511295 | 12.06019949 | 1.49E-30 | 4.19E-29 | yes |
| ARPC2    | 0.415446401 | 12.05792302 | 1.53E-30 | 4.28E-29 | yes |
| EMR4P    | 0.415436261 | 12.0575673  | 1.53E-30 | 4.29E-29 | yes |
| HLA-B    | 0.415381995 | 12.05566385 | 1.56E-30 | 4.37E-29 | yes |
| FUT7     | 0.415181813 | 12.04864352 | 1.67E-30 | 4.68E-29 | yes |
| FAM20A   | 0.415080201 | 12.04508085 | 1.74E-30 | 4.85E-29 | yes |
| CLDN23   | 0.414799496 | 12.03524165 | 1.92E-30 | 5.34E-29 | yes |
| SPPL2A   | 0.414555396 | 12.02668891 | 2.09E-30 | 5.81E-29 | yes |
| LTBR     | 0.414000912 | 12.00727264 | 2.54E-30 | 7.05E-29 | yes |
| ESR1     | 0.413714802 | 11.99726029 | 2.80E-30 | 7.78E-29 | yes |
| RNF130   | 0.413325629 | 11.98364815 | 3.21E-30 | 8.91E-29 | yes |
| HTRA4    | 0.413251679 | 11.98106248 | 3.30E-30 | 9.13E-29 | yes |
| SERPINB8 | 0.413165779 | 11.97805935 | 3.40E-30 | 9.39E-29 | yes |
| TIFA     | 0.413090818 | 11.97543896 | 3.49E-30 | 9.63E-29 | yes |
| PECAM1   | 0.412874402 | 11.96787545 | 3.76E-30 | 1.04E-28 | yes |
| C11orf75 | 0.412704033 | 11.96192295 | 3.99E-30 | 1.10E-28 | yes |
| LAT2     | 0.412364473 | 11.95006358 | 4.49E-30 | 1.24E-28 | yes |
| EPSTI1   | 0.412341709 | 11.94926876 | 4.53E-30 | 1.24E-28 | yes |
| LAMP3    | 0.412031159 | 11.93842822 | 5.05E-30 | 1.38E-28 | yes |
| DTX3L    | 0.410827208 | 11.89644859 | 7.67E-30 | 2.10E-28 | yes |
| EFCAB4B  | 0.410693242 | 11.89178207 | 8.03E-30 | 2.20E-28 | yes |
| CREB3L2  | 0.410552188 | 11.88686966 | 8.44E-30 | 2.30E-28 | yes |
| C12orf59 | 0.4103364   | 11.8793565  | 9.09E-30 | 2.48E-28 | yes |
| CXorf21  | 0.410289532 | 11.87772499 | 9.24E-30 | 2.52E-28 | yes |
| APBB1IP  | 0.410112125 | 11.87155037 | 9.82E-30 | 2.67E-28 | yes |
| MVP      | 0.410078898 | 11.87039413 | 9.94E-30 | 2.70E-28 | yes |
| PGCP     | 0.410020599 | 11.86836547 | 1.01E-29 | 2.75E-28 | yes |
| HEXB     | 0.409680273 | 11.85652666 | 1.14E-29 | 3.09E-28 | yes |
| AICDA    | 0.409499694 | 11.85024732 | 1.21E-29 | 3.29E-28 | yes |
| PPM1M    | 0.408661575 | 11.82112498 | 1.62E-29 | 4.38E-28 | yes |
| FCGR1A   | 0.408658471 | 11.82101719 | 1.62E-29 | 4.38E-28 | yes |
| GAA      | 0.408460058 | 11.8141282  | 1.74E-29 | 4.68E-28 | yes |
| HCP5     | 0.40841996  | 11.8127362  | 1.76E-29 | 4.74E-28 | yes |
| FBP1     | 0.408327661 | 11.80953242 | 1.82E-29 | 4.89E-28 | yes |
| IRF2     | 0.40814234  | 11.80310103 | 1.94E-29 | 5.20E-28 | yes |
| TLR3     | 0.408068348 | 11.80053369 | 1.99E-29 | 5.33E-28 | yes |
| AHR      | 0.407154696 | 11.76885529 | 2.72E-29 | 7.28E-28 | yes |
| ACTR3    | 0.40687239  | 11.75907567 | 3.00E-29 | 8.01E-28 | yes |
| FM04     | 0.406684182 | 11.75255804 | 3.20E-29 | 8.53E-28 | yes |
| PARP14   | 0.406584582 | 11.7491096  | 3.31E-29 | 8.82E-28 | yes |
| DOK1     | 0.406377295 | 11.74193437 | 3.55E-29 | 9.45E-28 | yes |
| MSN      | 0.406371343 | 11.7417284  | 3.56E-29 | 9.46E-28 | yes |
| ETV6     | 0.406294891 | 11.73908257 | 3.65E-29 | 9.70E-28 | yes |
| CTSA     | 0.406204998 | 11.735972   | 3.76E-29 | 9.99E-28 | yes |
| JAK2     | 0.406142638 | 11.73381438 | 3.84E-29 | 1.02E-27 | yes |
| PPARG    | 0.405865464 | 11.72422669 | 4.23E-29 | 1.12E-27 | yes |



|          |             |             |          |          |     |
|----------|-------------|-------------|----------|----------|-----|
| NMI      | 0.405563331 | 11.71378007 | 4.68E-29 | 1.24E-27 | yes |
| SH2D4A   | 0.405520039 | 11.71228357 | 4.75E-29 | 1.25E-27 | yes |
| ADAM6    | 0.405443163 | 11.70962636 | 4.88E-29 | 1.29E-27 | yes |
| LPAR5    | 0.405388397 | 11.70773359 | 4.97E-29 | 1.31E-27 | yes |
| GGCX     | 0.404593902 | 11.68029183 | 6.51E-29 | 1.71E-27 | yes |
| CAP1     | 0.404584751 | 11.67997593 | 6.54E-29 | 1.72E-27 | yes |
| CYBASC3  | 0.404183968 | 11.66614512 | 7.49E-29 | 1.96E-27 | yes |
| F13A1    | 0.404045804 | 11.66137903 | 7.85E-29 | 2.05E-27 | yes |
| KIAA1949 | 0.403931649 | 11.65744187 | 8.16E-29 | 2.13E-27 | yes |
| TRIM21   | 0.403921963 | 11.65710782 | 8.18E-29 | 2.14E-27 | yes |
| MGST2    | 0.403730073 | 11.65049115 | 8.73E-29 | 2.28E-27 | yes |
| NAT1     | 0.40361835  | 11.64663959 | 9.07E-29 | 2.36E-27 | yes |
| ERMAP    | 0.403471401 | 11.64157464 | 9.53E-29 | 2.48E-27 | yes |
| KMO      | 0.403354283 | 11.63753863 | 9.92E-29 | 2.58E-27 | yes |
| SIGLEC5  | 0.40317073  | 11.63121459 | 1.06E-28 | 2.74E-27 | yes |
| FILIP1L  | 0.403139214 | 11.63012892 | 1.07E-28 | 2.76E-27 | yes |
| CLEC4D   | 0.40273034  | 11.61604847 | 1.22E-28 | 3.17E-27 | yes |
| S100Z    | 0.40241375  | 11.6051517  | 1.36E-28 | 3.52E-27 | yes |
| SAT1     | 0.402398339 | 11.60462139 | 1.37E-28 | 3.54E-27 | yes |
| PLK3     | 0.402143615 | 11.59585783 | 1.49E-28 | 3.85E-27 | yes |
| IFI16    | 0.402141616 | 11.59578906 | 1.49E-28 | 3.85E-27 | yes |
| BTN3A3   | 0.401831983 | 11.58514072 | 1.66E-28 | 4.26E-27 | yes |
| CSF1R    | 0.401709192 | 11.58091924 | 1.73E-28 | 4.44E-27 | yes |
| RIN3     | 0.401564064 | 11.57593076 | 1.81E-28 | 4.65E-27 | yes |
| CD1D     | 0.401301919 | 11.56692274 | 1.98E-28 | 5.07E-27 | yes |
| BMP2K    | 0.40044752  | 11.53758667 | 2.64E-28 | 6.75E-27 | yes |
| CLEC2B   | 0.400189957 | 11.5287502  | 2.88E-28 | 7.35E-27 | yes |
| UBASH3A  | 0.399390832 | 11.5013545  | 3.75E-28 | 9.59E-27 | no  |
| SWAP70   | 0.399306873 | 11.49847801 | 3.86E-28 | 9.85E-27 | no  |
| DOCK11   | 0.399292992 | 11.49800248 | 3.88E-28 | 9.88E-27 | no  |
| ARF6     | 0.398991651 | 11.48768141 | 4.29E-28 | 1.09E-26 | no  |
| PARP9    | 0.398841145 | 11.48252819 | 4.51E-28 | 1.15E-26 | no  |
| RNASE2   | 0.398461198 | 11.46952392 | 5.12E-28 | 1.30E-26 | no  |
| MFSD7    | 0.39825021  | 11.46230559 | 5.49E-28 | 1.39E-26 | no  |
| TCN2     | 0.397787951 | 11.44649825 | 6.40E-28 | 1.62E-26 | no  |
| H6PD     | 0.397678422 | 11.44275434 | 6.64E-28 | 1.68E-26 | no  |
| CXCL12   | 0.397443342 | 11.43472083 | 7.18E-28 | 1.81E-26 | no  |
| TCL1A    | 0.396776472 | 11.41194602 | 8.95E-28 | 2.26E-26 | no  |
| CD300LB  | 0.396569557 | 11.40488387 | 9.58E-28 | 2.41E-26 | no  |
| TGOLN2   | 0.39653161  | 11.40358894 | 9.70E-28 | 2.44E-26 | no  |
| ANXA2    | 0.396287104 | 11.39524688 | 1.05E-27 | 2.64E-26 | no  |
| TNFRSF9  | 0.396117495 | 11.38946185 | 1.11E-27 | 2.79E-26 | no  |
| SLC22A16 | 0.396012713 | 11.38588865 | 1.15E-27 | 2.89E-26 | no  |
| SKAP1    | 0.396008961 | 11.3857607  | 1.15E-27 | 2.89E-26 | no  |
| MKNK1    | 0.395525452 | 11.36927925 | 1.35E-27 | 3.38E-26 | no  |
| NTAN1    | 0.395153113 | 11.35659492 | 1.53E-27 | 3.82E-26 | no  |
| C5AR1    | 0.395120858 | 11.35549642 | 1.54E-27 | 3.85E-26 | no  |
| DRAM1    | 0.394985143 | 11.35087492 | 1.62E-27 | 4.02E-26 | no  |
| TMEM149  | 0.394958384 | 11.34996382 | 1.63E-27 | 4.05E-26 | no  |
| B3GNT2   | 0.394662281 | 11.33988409 | 1.80E-27 | 4.46E-26 | no  |
| SIGLEC1  | 0.394652282 | 11.33954376 | 1.80E-27 | 4.47E-26 | no  |

|           |              |              |          |          |    |
|-----------|--------------|--------------|----------|----------|----|
| GPR34     | 0.39449457   | 11.33417684  | 1.90E-27 | 4.70E-26 | no |
| TNFAIP2   | 0.394307992  | 11.3278291   | 2.02E-27 | 4.99E-26 | no |
| SLFN14    | 0.394289148  | 11.32718808  | 2.03E-27 | 5.02E-26 | no |
| GIT2      | 0.394232967  | 11.32527709  | 2.07E-27 | 5.10E-26 | no |
| SECTM1    | 0.394099557  | 11.32073972  | 2.16E-27 | 5.33E-26 | no |
| TRIM14    | 0.394011073  | 11.31773081  | 2.22E-27 | 5.48E-26 | no |
| DARC      | 0.393750802  | 11.30888237  | 2.42E-27 | 5.96E-26 | no |
| IL2       | 0.393682344  | 11.30655552  | 2.48E-27 | 6.08E-26 | no |
| SRGN      | 0.393133803  | 11.2879191   | 2.96E-27 | 7.27E-26 | no |
| BNIP2     | 0.393038846  | 11.28469441  | 3.06E-27 | 7.49E-26 | no |
| HSD3B7    | 0.392995979  | 11.28323881  | 3.10E-27 | 7.59E-26 | no |
| SLC25A24  | 0.392865243  | 11.27880007  | 3.23E-27 | 7.91E-26 | no |
| TEP1      | 0.392768765  | 11.27552497  | 3.34E-27 | 8.15E-26 | no |
| GPNMB     | 0.392196437  | 11.25610546  | 4.02E-27 | 9.81E-26 | no |
| APOL6     | 0.39175467   | 11.24112653  | 4.64E-27 | 1.13E-25 | no |
| MICB      | 0.391726238  | 11.24016282  | 4.69E-27 | 1.14E-25 | no |
| PICALM    | 0.39137923   | 11.22840377  | 5.25E-27 | 1.27E-25 | no |
| MAPKAPK2  | 0.390655417  | 11.20389415  | 6.63E-27 | 1.61E-25 | no |
| TNFRSF1A  | 0.390505919  | 11.19883491  | 6.96E-27 | 1.69E-25 | no |
| CD300A    | 0.390389429  | 11.19489347  | 7.23E-27 | 1.75E-25 | no |
| ESYT1     | 0.390166675  | 11.18735832  | 7.77E-27 | 1.88E-25 | no |
| DNASE2    | 0.389918048  | 11.17895069  | 8.42E-27 | 2.03E-25 | no |
| LOXL3     | 0.389592068  | 11.16793166  | 9.35E-27 | 2.26E-25 | no |
| TERF2     | -0.389355925 | -11.15995247 | 1.01E-26 | 2.43E-25 | no |
| LY86      | 0.388968006  | 11.14685043  | 1.14E-26 | 2.75E-25 | no |
| FPR1      | 0.388840854  | 11.14255735  | 1.19E-26 | 2.86E-25 | no |
| AMPD1     | 0.38854217   | 11.13247577  | 1.31E-26 | 3.15E-25 | no |
| SDCBP     | 0.388521335  | 11.13177265  | 1.32E-26 | 3.17E-25 | no |
| GLIPR1    | 0.388486039  | 11.1305816   | 1.34E-26 | 3.20E-25 | no |
| PLAUR     | 0.388384801  | 11.12716571  | 1.38E-26 | 3.30E-25 | no |
| REL       | 0.388194923  | 11.12076019  | 1.47E-26 | 3.51E-25 | no |
| ZNF600    | 0.388111936  | 11.11796119  | 1.51E-26 | 3.60E-25 | no |
| FGF20     | 0.387850674  | 11.1091513   | 1.64E-26 | 3.91E-25 | no |
| C14orf182 | 0.387723667  | 11.1048697   | 1.71E-26 | 4.06E-25 | no |
| BTBD19    | 0.387510358  | 11.09768039  | 1.83E-26 | 4.35E-25 | no |
| TBC1D8    | 0.387348918  | 11.09224067  | 1.92E-26 | 4.57E-25 | no |
| LRRK1     | 0.387344317  | 11.09208564  | 1.93E-26 | 4.57E-25 | no |
| FAM109B   | 0.38645076   | 11.06199908  | 2.56E-26 | 6.08E-25 | no |
| S100A4    | 0.386357177  | 11.05885023  | 2.64E-26 | 6.25E-25 | no |
| TMEM110   | 0.38633399   | 11.05807009  | 2.66E-26 | 6.29E-25 | no |
| SLC4A7    | 0.38564761   | 11.03498785  | 3.31E-26 | 7.82E-25 | no |
| DRAM2     | 0.385454463  | 11.02849638  | 3.52E-26 | 8.31E-25 | no |
| FAM105A   | 0.38522516   | 11.02079197  | 3.79E-26 | 8.93E-25 | no |
| FOLR2     | 0.385129554  | 11.01758041  | 3.90E-26 | 9.19E-25 | no |
| NUMB      | 0.384172768  | 10.98546313  | 5.29E-26 | 1.24E-24 | no |
| CHST13    | 0.384123625  | 10.98381462  | 5.37E-26 | 1.26E-24 | no |
| RHOG      | 0.38411804   | 10.98362727  | 5.38E-26 | 1.26E-24 | no |
| RELB      | 0.384063604  | 10.98180136  | 5.47E-26 | 1.28E-24 | no |
| PALLD     | 0.38400778   | 10.97992903  | 5.57E-26 | 1.30E-24 | no |
| MFS6L     | 0.38376121   | 10.97166079  | 6.02E-26 | 1.41E-24 | no |
| POU6F1    | -0.383621084 | -10.96696315 | 6.30E-26 | 1.47E-24 | no |

|           |             |             |          |             |
|-----------|-------------|-------------|----------|-------------|
| LOC283314 | 0.383467635 | 10.96181989 | 6.61E-26 | 1.54E-24 no |
| CEBPB     | 0.383432679 | 10.96064841 | 6.68E-26 | 1.56E-24 no |
| CTSD      | 0.383152139 | 10.95124855 | 7.30E-26 | 1.70E-24 no |
| KCNK13    | 0.382423549 | 10.92685276 | 9.19E-26 | 2.14E-24 no |
| CDH11     | 0.38239548  | 10.9259134  | 9.27E-26 | 2.15E-24 no |
| GLB1      | 0.38230484  | 10.92288025 | 9.54E-26 | 2.21E-24 no |
| SLC30A7   | 0.382289496 | 10.92236682 | 9.58E-26 | 2.22E-24 no |
| SP110     | 0.382275574 | 10.92190094 | 9.63E-26 | 2.23E-24 no |
| HLA-H     | 0.38224861  | 10.92099874 | 9.71E-26 | 2.24E-24 no |
| HGF       | 0.382232479 | 10.92045901 | 9.76E-26 | 2.25E-24 no |
| PYGL      | 0.382064786 | 10.91484888 | 1.03E-25 | 2.37E-24 no |
| NLRC5     | 0.381824933 | 10.90682684 | 1.11E-25 | 2.55E-24 no |
| SLC17A9   | 0.381731878 | 10.90371525 | 1.14E-25 | 2.63E-24 no |
| KIF16B    | 0.381559929 | 10.89796662 | 1.21E-25 | 2.77E-24 no |
| TRAM1     | 0.381341783 | 10.89067541 | 1.29E-25 | 2.96E-24 no |
| IL7       | 0.381082459 | 10.88201068 | 1.40E-25 | 3.21E-24 no |
| C10orf11  | 0.380842784 | 10.87400514 | 1.51E-25 | 3.45E-24 no |
| PION      | 0.380840131 | 10.87391653 | 1.51E-25 | 3.45E-24 no |
| TMEM51    | 0.380745939 | 10.87077108 | 1.56E-25 | 3.55E-24 no |
| SHKBP1    | 0.380610799 | 10.8662589  | 1.62E-25 | 3.70E-24 no |
| IRF1      | 0.38052752  | 10.86347869 | 1.67E-25 | 3.80E-24 no |
| MDFIC     | 0.380362398 | 10.85796715 | 1.75E-25 | 3.99E-24 no |
| IL18R1    | 0.37971743  | 10.83645064 | 2.15E-25 | 4.88E-24 no |
| PRR16     | 0.379584527 | 10.83201923 | 2.24E-25 | 5.08E-24 no |
| GALNT2    | 0.379555159 | 10.83104012 | 2.26E-25 | 5.12E-24 no |
| CTSL1     | 0.379359015 | 10.8245017  | 2.40E-25 | 5.44E-24 no |
| RFTN1     | 0.379125922 | 10.81673384 | 2.58E-25 | 5.84E-24 no |
| TMEM176B  | 0.378985778 | 10.8120647  | 2.69E-25 | 6.09E-24 no |
| SLC25A43  | 0.378964242 | 10.81134725 | 2.71E-25 | 6.13E-24 no |
| SULT1B1   | 0.378915664 | 10.80972902 | 2.75E-25 | 6.21E-24 no |
| GLA       | 0.378753609 | 10.80433144 | 2.90E-25 | 6.53E-24 no |
| COL14A1   | 0.378745952 | 10.80407645 | 2.90E-25 | 6.53E-24 no |
| PLSCR1    | 0.378689799 | 10.80220644 | 2.95E-25 | 6.64E-24 no |
| NAPSB     | 0.37865612  | 10.80108492 | 2.98E-25 | 6.70E-24 no |
| LRCH1     | 0.378633927 | 10.80034593 | 3.01E-25 | 6.74E-24 no |
| KCTD9     | 0.378214355 | 10.78637879 | 3.42E-25 | 7.67E-24 no |
| ITGA5     | 0.378122862 | 10.78333409 | 3.52E-25 | 7.89E-24 no |
| SIGLEC6   | 0.378062771 | 10.78133462 | 3.59E-25 | 8.03E-24 no |
| TIMD4     | 0.377983311 | 10.77869087 | 3.68E-25 | 8.22E-24 no |
| TMEM194B  | 0.377954629 | 10.77773665 | 3.71E-25 | 8.28E-24 no |
| UBA7      | 0.37786857  | 10.77487378 | 3.81E-25 | 8.49E-24 no |
| IFITM2    | 0.377642496 | 10.76735464 | 4.09E-25 | 9.10E-24 no |
| SAMD9L    | 0.377468831 | 10.76158016 | 4.31E-25 | 9.59E-24 no |
| TLN1      | 0.377093836 | 10.74911579 | 4.84E-25 | 1.08E-23 no |
| NLRP6     | 0.377070926 | 10.7483545  | 4.88E-25 | 1.08E-23 no |
| ABP1      | 0.377020922 | 10.74669293 | 4.95E-25 | 1.10E-23 no |
| AIM2      | 0.376980794 | 10.74535964 | 5.02E-25 | 1.11E-23 no |
| ALOX5AP   | 0.37695489  | 10.74449895 | 5.06E-25 | 1.12E-23 no |
| LRMP      | 0.376940366 | 10.74401643 | 5.08E-25 | 1.12E-23 no |
| EHD4      | 0.376918724 | 10.74329739 | 5.11E-25 | 1.13E-23 no |
| TTF2      | 0.376776838 | 10.73858397 | 5.34E-25 | 1.18E-23 no |

|           |              |              |          |          |    |
|-----------|--------------|--------------|----------|----------|----|
| SH3TC1    | 0.376673246  | 10.73514325  | 5.51E-25 | 1.21E-23 | no |
| MAPK13    | 0.376651207  | 10.73441127  | 5.55E-25 | 1.22E-23 | no |
| RCAN3     | 0.376629438  | 10.73368833  | 5.59E-25 | 1.23E-23 | no |
| MGC29506  | 0.37657989   | 10.73204287  | 5.68E-25 | 1.25E-23 | no |
| ZNF267    | 0.376552698  | 10.7311399   | 5.72E-25 | 1.26E-23 | no |
| GZMB      | 0.376457338  | 10.72797349  | 5.89E-25 | 1.29E-23 | no |
| CD164     | 0.376209214  | 10.71973645  | 6.36E-25 | 1.39E-23 | no |
| LUM       | 0.376205443  | 10.71961129  | 6.37E-25 | 1.39E-23 | no |
| ICAM1     | 0.376203354  | 10.71954197  | 6.37E-25 | 1.39E-23 | no |
| FNDC3B    | 0.376039538  | 10.71410522  | 6.70E-25 | 1.46E-23 | no |
| MAPT      | -0.375588544 | -10.69914368 | 7.70E-25 | 1.68E-23 | no |
| PLAU      | 0.375573048  | 10.69862976  | 7.74E-25 | 1.68E-23 | no |
| TRADD     | 0.375471117  | 10.69524954  | 7.99E-25 | 1.74E-23 | no |
| RASL11A   | 0.375326337  | 10.69044914  | 8.35E-25 | 1.81E-23 | no |
| RNF19B    | 0.37504782   | 10.68121703  | 9.09E-25 | 1.97E-23 | no |
| FAH       | 0.374880148  | 10.6756608   | 9.57E-25 | 2.07E-23 | no |
| TRIM6     | 0.374801832  | 10.67306597  | 9.81E-25 | 2.12E-23 | no |
| SHC1      | 0.374791672  | 10.67272938  | 9.84E-25 | 2.13E-23 | no |
| STARD5    | 0.374016119  | 10.6470482   | 1.25E-24 | 2.69E-23 | no |
| RNASET2   | 0.373954659  | 10.64501414  | 1.27E-24 | 2.74E-23 | no |
| CCR3      | 0.373646881  | 10.63483058  | 1.40E-24 | 3.01E-23 | no |
| CACNA2D4  | 0.372867874  | 10.60907354  | 1.77E-24 | 3.81E-23 | no |
| BCL7A     | -0.372810786 | -10.60718702 | 1.80E-24 | 3.87E-23 | no |
| TBC1D1    | 0.372687823  | 10.60312406  | 1.87E-24 | 4.02E-23 | no |
| TMBIM1    | 0.372600112  | 10.60022629  | 1.92E-24 | 4.12E-23 | no |
| PTRF      | 0.372535397  | 10.59808849  | 1.96E-24 | 4.20E-23 | no |
| TWF2      | 0.372371654  | 10.59268016  | 2.06E-24 | 4.41E-23 | no |
| IL18BP    | 0.372283131  | 10.58975677  | 2.12E-24 | 4.53E-23 | no |
| GPR84     | 0.372274767  | 10.58948057  | 2.12E-24 | 4.53E-23 | no |
| FYCO1     | 0.37217321   | 10.58612717  | 2.19E-24 | 4.67E-23 | no |
| PARP4     | 0.372036253  | 10.58160561  | 2.28E-24 | 4.86E-23 | no |
| FSTL1     | 0.371832088  | 10.5748667   | 2.43E-24 | 5.17E-23 | no |
| STAT3     | 0.371706154  | 10.57071086  | 2.52E-24 | 5.36E-23 | no |
| PDK3      | 0.371624069  | 10.56800242  | 2.58E-24 | 5.49E-23 | no |
| ZC3HAV1   | 0.371514534  | 10.56438869  | 2.67E-24 | 5.67E-23 | no |
| CASP6     | 0.371499716  | 10.56389986  | 2.68E-24 | 5.69E-23 | no |
| ARID3A    | 0.371483048  | 10.56334998  | 2.70E-24 | 5.71E-23 | no |
| DERL3     | 0.371456476  | 10.56247345  | 2.72E-24 | 5.75E-23 | no |
| S100A9    | 0.37122358   | 10.55479211  | 2.92E-24 | 6.17E-23 | no |
| OSMR      | 0.371051809  | 10.54912828  | 3.07E-24 | 6.49E-23 | no |
| SPINT1    | 0.370924572  | 10.54493368  | 3.19E-24 | 6.74E-23 | no |
| PRICKLE3  | 0.370870667  | 10.54315681  | 3.25E-24 | 6.84E-23 | no |
| RIPK1     | 0.370852747  | 10.54256611  | 3.26E-24 | 6.87E-23 | no |
| HPS5      | 0.370738511  | 10.53880105  | 3.38E-24 | 7.11E-23 | no |
| NHLRC3    | 0.370598437  | 10.53418517  | 3.52E-24 | 7.41E-23 | no |
| ANKRD22   | 0.370289996  | 10.52402394  | 3.87E-24 | 8.12E-23 | no |
| SPIB      | 0.370099977  | 10.51776602  | 4.10E-24 | 8.59E-23 | no |
| SSH1      | 0.369212407  | 10.48855575  | 5.35E-24 | 1.12E-22 | no |
| KIAA0247  | 0.36910729   | 10.48509853  | 5.52E-24 | 1.16E-22 | no |
| TMEM154   | 0.368995189  | 10.4814121   | 5.71E-24 | 1.19E-22 | no |
| C10orf125 | 0.368953827  | 10.48005204  | 5.78E-24 | 1.21E-22 | no |

|              |              |              |          |             |
|--------------|--------------|--------------|----------|-------------|
| ANXA2P2      | 0.368885797  | 10.47781528  | 5.90E-24 | 1.23E-22 no |
| TMOD3        | 0.368831246  | 10.47602182  | 6.00E-24 | 1.25E-22 no |
| ARSA         | 0.368590081  | 10.46809461  | 6.45E-24 | 1.34E-22 no |
| SYTL3        | 0.368545015  | 10.46661353  | 6.54E-24 | 1.36E-22 no |
| ACCS         | 0.36843633   | 10.463042    | 6.75E-24 | 1.40E-22 no |
| GCA          | 0.368007548  | 10.44895652  | 7.68E-24 | 1.59E-22 no |
| REX02        | 0.367562688  | 10.43435104  | 8.77E-24 | 1.82E-22 no |
| CFP          | 0.367146159  | 10.42068324  | 9.94E-24 | 2.06E-22 no |
| LOC151534    | 0.367120142  | 10.41982977  | 1.00E-23 | 2.07E-22 no |
| FUT4         | 0.366924806  | 10.4134228   | 1.06E-23 | 2.19E-22 no |
| ATL3         | 0.366611704  | 10.40315645  | 1.17E-23 | 2.41E-22 no |
| LTBP2        | 0.366445354  | 10.39770362  | 1.22E-23 | 2.53E-22 no |
| LGALS8       | 0.366048552  | 10.38470147  | 1.38E-23 | 2.84E-22 no |
| MOBKL2C      | 0.365707471  | 10.37353034  | 1.52E-23 | 3.14E-22 no |
| FLII         | 0.36553589   | 10.3679125   | 1.60E-23 | 3.30E-22 no |
| NEXN         | 0.365408824  | 10.36375296  | 1.67E-23 | 3.42E-22 no |
| LOC100272216 | 0.365204894  | 10.35707864  | 1.77E-23 | 3.63E-22 no |
| SLC39A1      | 0.365184891  | 10.3564241   | 1.78E-23 | 3.65E-22 no |
| PTPN1        | 0.365151884  | 10.355344    | 1.80E-23 | 3.68E-22 no |
| CCL17        | 0.365114885  | 10.35413334  | 1.82E-23 | 3.72E-22 no |
| GNRHR2       | -0.365017992 | -10.35096315 | 1.87E-23 | 3.82E-22 no |
| TREML1       | 0.364849125  | 10.34543901  | 1.97E-23 | 4.02E-22 no |
| RPS6KA3      | 0.364797747  | 10.34375853  | 2.00E-23 | 4.07E-22 no |
| STK10        | 0.364526822  | 10.33489879  | 2.16E-23 | 4.41E-22 no |
| COLEC12      | 0.364094883  | 10.32077985  | 2.46E-23 | 5.00E-22 no |
| FCGR1C       | 0.363910386  | 10.31475148  | 2.60E-23 | 5.28E-22 no |
| HTR7         | 0.363841285  | 10.31249399  | 2.65E-23 | 5.38E-22 no |
| ADAM12       | 0.363549598  | 10.30296693  | 2.89E-23 | 5.86E-22 no |
| EPS8         | 0.363388855  | 10.29771824  | 3.03E-23 | 6.14E-22 no |
| SLC43A3      | 0.363261613  | 10.29356418  | 3.14E-23 | 6.37E-22 no |
| C6orf150     | 0.363017086  | 10.28558303  | 3.38E-23 | 6.83E-22 no |
| ALG2         | 0.36289088   | 10.28146471  | 3.50E-23 | 7.08E-22 no |
| FCGR1B       | 0.362734515  | 10.27636317  | 3.67E-23 | 7.41E-22 no |
| FAS          | 0.362704657  | 10.27538913  | 3.70E-23 | 7.47E-22 no |
| ZBTB7B       | 0.362618575  | 10.27258119  | 3.80E-23 | 7.65E-22 no |
| APEX2        | 0.362323859  | 10.26296996  | 4.14E-23 | 8.34E-22 no |
| ZDHHC12      | 0.362315257  | 10.26268946  | 4.15E-23 | 8.35E-22 no |
| ATP8B1       | 0.362112513  | 10.25607975  | 4.40E-23 | 8.85E-22 no |
| PUS10        | 0.361879858  | 10.24849694  | 4.71E-23 | 9.47E-22 no |
| SH3BGRL3     | 0.361848358  | 10.24747043  | 4.76E-23 | 9.54E-22 no |
| C10orf128    | 0.36139428   | 10.23267782  | 5.43E-23 | 1.09E-21 no |
| ZAK          | 0.361289787  | 10.22927491  | 5.60E-23 | 1.12E-21 no |
| LRR8C        | 0.361246777  | 10.22787439  | 5.67E-23 | 1.13E-21 no |
| BCL2A1       | 0.361219424  | 10.22698375  | 5.72E-23 | 1.14E-21 no |
| CLDN7        | 0.361025262  | 10.2206624   | 6.05E-23 | 1.21E-21 no |
| DUSP23       | 0.360896117  | 10.21645868  | 6.29E-23 | 1.25E-21 no |
| SMARCC2      | -0.360871504 | -10.2156576  | 6.33E-23 | 1.26E-21 no |
| SLFN12       | 0.36077458   | 10.21250321  | 6.51E-23 | 1.30E-21 no |
| ACOT9        | 0.360604019  | 10.20695326  | 6.85E-23 | 1.36E-21 no |
| C14orf106    | 0.36058443   | 10.20631593  | 6.88E-23 | 1.37E-21 no |
| MAPKAPK3     | 0.360240962  | 10.1951435   | 7.61E-23 | 1.51E-21 no |

|           |              |              |          |             |
|-----------|--------------|--------------|----------|-------------|
| LPCAT2    | 0.360188171  | 10.19342672  | 7.73E-23 | 1.53E-21 no |
| RAB8A     | 0.360171059  | 10.19287027  | 7.77E-23 | 1.54E-21 no |
| CYFIP1    | 0.360155609  | 10.19236787  | 7.80E-23 | 1.54E-21 no |
| CPPED1    | 0.359903605  | 10.18417453  | 8.39E-23 | 1.66E-21 no |
| NLGN2     | -0.359864743 | -10.18291124 | 8.49E-23 | 1.68E-21 no |
| HLA-A     | 0.359813434  | 10.18124344  | 8.62E-23 | 1.70E-21 no |
| BIRC3     | 0.359763122  | 10.17960813  | 8.74E-23 | 1.72E-21 no |
| BST1      | 0.359574094  | 10.17346506  | 9.24E-23 | 1.82E-21 no |
| TMEM50A   | 0.359529594  | 10.1720191   | 9.36E-23 | 1.84E-21 no |
| CFH       | 0.359523851  | 10.17183249  | 9.37E-23 | 1.84E-21 no |
| CMKLR1    | 0.359235502  | 10.16246501  | 1.02E-22 | 2.00E-21 no |
| SVIL      | 0.358773758  | 10.14747148  | 1.17E-22 | 2.29E-21 no |
| C9orf66   | 0.358758755  | 10.14698445  | 1.17E-22 | 2.29E-21 no |
| ACP5      | 0.358722163  | 10.14579666  | 1.18E-22 | 2.32E-21 no |
| MAP2K3    | 0.358669958  | 10.14410212  | 1.20E-22 | 2.35E-21 no |
| GSTK1     | 0.358606599  | 10.1420457   | 1.22E-22 | 2.39E-21 no |
| YY2       | 0.358482493  | 10.13801808  | 1.27E-22 | 2.47E-21 no |
| GSDMD     | 0.358451669  | 10.13701783  | 1.28E-22 | 2.49E-21 no |
| NFE2L3    | 0.358437275  | 10.13655077  | 1.28E-22 | 2.50E-21 no |
| RAP1A     | 0.35835005   | 10.13372058  | 1.32E-22 | 2.56E-21 no |
| C6orf115  | 0.358138676  | 10.12686337  | 1.40E-22 | 2.72E-21 no |
| BCL3      | 0.3581012    | 10.12564778  | 1.42E-22 | 2.75E-21 no |
| BNC2      | 0.357832223  | 10.1169249   | 1.53E-22 | 2.97E-21 no |
| MYOM3     | 0.35773939   | 10.11391499  | 1.57E-22 | 3.05E-21 no |
| NOD1      | 0.357700035  | 10.11263908  | 1.59E-22 | 3.08E-21 no |
| GPR77     | 0.357603911  | 10.109523    | 1.63E-22 | 3.16E-21 no |
| TNFRSF10C | 0.357593649  | 10.10919035  | 1.64E-22 | 3.17E-21 no |
| NFKBIZ    | 0.357573045  | 10.10852247  | 1.65E-22 | 3.18E-21 no |
| DNAJC10   | 0.357542973  | 10.10754774  | 1.66E-22 | 3.21E-21 no |
| P2RY6     | 0.357225594  | 10.09726251  | 1.82E-22 | 3.51E-21 no |
| GPA33     | 0.357123072  | 10.09394098  | 1.88E-22 | 3.61E-21 no |
| FN1       | 0.357101546  | 10.09324361  | 1.89E-22 | 3.63E-21 no |
| CLNK      | 0.35692137   | 10.08740737  | 1.99E-22 | 3.82E-21 no |
| SCML4     | 0.356917298  | 10.0872755   | 1.99E-22 | 3.82E-21 no |
| XBP1      | 0.356702541  | 10.08032082  | 2.12E-22 | 4.06E-21 no |
| CHSY1     | 0.356677838  | 10.07952098  | 2.13E-22 | 4.09E-21 no |
| NPL       | 0.356421933  | 10.0712364   | 2.30E-22 | 4.40E-21 no |
| PNMA1     | -0.356324863 | -10.06809459 | 2.36E-22 | 4.52E-21 no |
| APOB48R   | 0.356193593  | 10.06384644  | 2.45E-22 | 4.69E-21 no |
| ANXA4     | 0.356048743  | 10.05915957  | 2.56E-22 | 4.88E-21 no |
| ACTR2     | 0.355974401  | 10.05675445  | 2.61E-22 | 4.98E-21 no |
| IER3      | 0.35553984   | 10.04269982  | 2.96E-22 | 5.64E-21 no |
| SNX2      | 0.355392383  | 10.03793243  | 3.09E-22 | 5.87E-21 no |
| ST6GAL1   | 0.355387458  | 10.03777321  | 3.09E-22 | 5.88E-21 no |
| FAM129C   | 0.355348435  | 10.03651173  | 3.13E-22 | 5.94E-21 no |
| FAM70B    | 0.355264408  | 10.03379559  | 3.20E-22 | 6.08E-21 no |
| CHRNA6    | 0.35500637   | 10.02545642  | 3.45E-22 | 6.54E-21 no |
| POLD4     | 0.354707606  | 10.01580436  | 3.75E-22 | 7.11E-21 no |
| TMEM92    | 0.354684636  | 10.01506242  | 3.78E-22 | 7.15E-21 no |
| TMEM2     | 0.35464399   | 10.01374958  | 3.82E-22 | 7.23E-21 no |
| DDX60L    | 0.354356223  | 10.00445681  | 4.15E-22 | 7.84E-21 no |

|          |              |              |          |             |
|----------|--------------|--------------|----------|-------------|
| MMP14    | 0.354305114  | 10.00280673  | 4.21E-22 | 7.95E-21 no |
| CLEC17A  | 0.354163985  | 9.998250769  | 4.38E-22 | 8.27E-21 no |
| ALOX15B  | 0.353568657  | 9.979040846  | 5.19E-22 | 9.78E-21 no |
| SCAMP2   | 0.35356571   | 9.978945804  | 5.20E-22 | 9.78E-21 no |
| TNNI2    | 0.353434791  | 9.974723216  | 5.39E-22 | 1.01E-20 no |
| UBQLN4   | -0.353382469 | -9.973035823 | 5.47E-22 | 1.03E-20 no |
| LST1     | 0.353283275  | 9.969837118  | 5.63E-22 | 1.06E-20 no |
| SIGLEC14 | 0.353266759  | 9.969304559  | 5.66E-22 | 1.06E-20 no |
| KIAA0649 | -0.353128001 | -9.964830778 | 5.89E-22 | 1.10E-20 no |
| DDB2     | 0.353084927  | 9.963442153  | 5.96E-22 | 1.12E-20 no |
| NCAM1    | -0.353031429 | -9.961717604 | 6.05E-22 | 1.13E-20 no |
| HTR2B    | 0.352539297  | 9.945858341  | 6.96E-22 | 1.30E-20 no |
| STX3     | 0.352465444  | 9.943479208  | 7.10E-22 | 1.33E-20 no |
| PPIC     | 0.352143153  | 9.933099232  | 7.78E-22 | 1.45E-20 no |
| IKBIP    | 0.352100273  | 9.931718526  | 7.88E-22 | 1.47E-20 no |
| C7       | 0.352097097  | 9.931616235  | 7.88E-22 | 1.47E-20 no |
| DIO3     | 0.352030459  | 9.929470665  | 8.03E-22 | 1.49E-20 no |
| GPX8     | 0.351872764  | 9.924393958  | 8.40E-22 | 1.56E-20 no |
| RNF213   | 0.351765606  | 9.920944761  | 8.66E-22 | 1.61E-20 no |
| F11R     | 0.351504742  | 9.912549946  | 9.32E-22 | 1.73E-20 no |
| NAGK     | 0.351297808  | 9.90589248   | 9.88E-22 | 1.83E-20 no |
| TPM4     | 0.3512259    | 9.903579449  | 1.01E-21 | 1.87E-20 no |
| DCTD     | 0.351073132  | 9.898666125  | 1.05E-21 | 1.95E-20 no |
| CARD17   | 0.351039274  | 9.897577287  | 1.06E-21 | 1.96E-20 no |
| CALD1    | 0.351004558  | 9.896460934  | 1.07E-21 | 1.98E-20 no |
| IRAK4    | 0.350867555  | 9.892055747  | 1.12E-21 | 2.06E-20 no |
| ANXA1    | 0.350866314  | 9.892015858  | 1.12E-21 | 2.06E-20 no |
| TNPO2    | -0.350671687 | -9.885759105 | 1.18E-21 | 2.17E-20 no |
| LSAMP    | -0.350577821 | -9.882742073 | 1.21E-21 | 2.23E-20 no |
| LATS2    | 0.35047413   | 9.87940965   | 1.25E-21 | 2.29E-20 no |
| CASP7    | 0.3501996    | 9.870588792  | 1.35E-21 | 2.47E-20 no |
| HGSNAT   | 0.350049837  | 9.865778026  | 1.40E-21 | 2.58E-20 no |
| ERAP1    | 0.349868628  | 9.859958274  | 1.48E-21 | 2.71E-20 no |
| EMILIN1  | 0.349839246  | 9.859014766  | 1.49E-21 | 2.73E-20 no |
| GBP1     | 0.349772805  | 9.856881319  | 1.52E-21 | 2.78E-20 no |
| NFKB2    | 0.349366358  | 9.843833862  | 1.70E-21 | 3.11E-20 no |
| COPZ2    | 0.349342601  | 9.843071416  | 1.71E-21 | 3.13E-20 no |
| SNX20    | 0.349104595  | 9.835434267  | 1.83E-21 | 3.34E-20 no |
| KIR2DL4  | 0.348977802  | 9.831366639  | 1.90E-21 | 3.46E-20 no |
| CD44     | 0.348946752  | 9.830370597  | 1.91E-21 | 3.48E-20 no |
| HPSE     | 0.348893276  | 9.82865529   | 1.94E-21 | 3.53E-20 no |
| BLK      | 0.348878186  | 9.828171267  | 1.95E-21 | 3.54E-20 no |
| BACE2    | 0.348814106  | 9.826116013  | 1.98E-21 | 3.61E-20 no |
| MARCO    | 0.348727811  | 9.823348453  | 2.03E-21 | 3.69E-20 no |
| SOBP     | -0.348687666 | -9.822061068 | 2.06E-21 | 3.73E-20 no |
| TNFSF13B | 0.348532875  | 9.817097768  | 2.15E-21 | 3.89E-20 no |
| USP11    | -0.348462615 | -9.814845214 | 2.19E-21 | 3.96E-20 no |
| MEFV     | 0.348118022  | 9.803800198  | 2.41E-21 | 4.36E-20 no |
| TMEM119  | 0.348096115  | 9.803098168  | 2.43E-21 | 4.38E-20 no |
| ADCY7    | 0.348031406  | 9.801024674  | 2.47E-21 | 4.46E-20 no |
| ENOX2    | 0.34801264   | 9.800423374  | 2.48E-21 | 4.48E-20 no |

|           |              |              |          |          |    |
|-----------|--------------|--------------|----------|----------|----|
| S100A8    | 0.34797387   | 9.799181118  | 2.51E-21 | 4.52E-20 | no |
| SRPX2     | 0.347625968  | 9.788036533  | 2.76E-21 | 4.98E-20 | no |
| SLC25A45  | 0.347486752  | 9.783578213  | 2.87E-21 | 5.17E-20 | no |
| COL5A2    | 0.347318041  | 9.778176343  | 3.01E-21 | 5.41E-20 | no |
| FAM192A   | -0.347237224 | -9.775589065 | 3.08E-21 | 5.53E-20 | no |
| SERPINB9  | 0.347149857  | 9.77279239   | 3.16E-21 | 5.66E-20 | no |
| PARP12    | 0.347139745  | 9.77246872   | 3.17E-21 | 5.67E-20 | no |
| MPZL3     | 0.346945044  | 9.766237342  | 3.34E-21 | 5.98E-20 | no |
| PFN1      | 0.346881379  | 9.764200043  | 3.40E-21 | 6.08E-20 | no |
| CLIC1     | 0.346797082  | 9.761502784  | 3.48E-21 | 6.22E-20 | no |
| LASS2     | 0.346784884  | 9.761112498  | 3.49E-21 | 6.24E-20 | no |
| FAM105B   | 0.346421202  | 9.749478921  | 3.86E-21 | 6.89E-20 | no |
| PIGB      | 0.346258433  | 9.744273848  | 4.04E-21 | 7.21E-20 | no |
| CCNYL1    | 0.345898041  | 9.732752654  | 4.47E-21 | 7.96E-20 | no |
| SMARCAL1  | 0.345639895  | 9.724503101  | 4.80E-21 | 8.54E-20 | no |
| PGM2      | 0.34563212   | 9.724254681  | 4.81E-21 | 8.55E-20 | no |
| ATP7A     | 0.345552578  | 9.721713289  | 4.91E-21 | 8.73E-20 | no |
| UBE2Z     | 0.345539106  | 9.721282879  | 4.93E-21 | 8.76E-20 | no |
| SLC16A3   | 0.345427909  | 9.71773058   | 5.09E-21 | 9.02E-20 | no |
| VNN3      | 0.345423601  | 9.717592965  | 5.09E-21 | 9.02E-20 | no |
| CLECL1    | 0.34505267   | 9.705746601  | 5.64E-21 | 9.98E-20 | no |
| MSLN      | 0.345050904  | 9.705690192  | 5.64E-21 | 9.98E-20 | no |
| SNTB2     | 0.345024811  | 9.704857057  | 5.68E-21 | 1.00E-19 | no |
| CFD       | 0.344821496  | 9.698366209  | 6.01E-21 | 1.06E-19 | no |
| CR1       | 0.344727456  | 9.695364513  | 6.17E-21 | 1.09E-19 | no |
| ABHD14B   | 0.344620253  | 9.691943043  | 6.36E-21 | 1.12E-19 | no |
| ADAMTSL4  | 0.344602951  | 9.691390898  | 6.39E-21 | 1.12E-19 | no |
| GCLM      | 0.344588199  | 9.690920113  | 6.41E-21 | 1.13E-19 | no |
| SLC1A5    | 0.344515731  | 9.688607578  | 6.54E-21 | 1.15E-19 | no |
| LPHN1     | -0.344445581 | -9.686369191 | 6.67E-21 | 1.17E-19 | no |
| CALCR     | 0.343981499  | 9.671565658  | 7.58E-21 | 1.33E-19 | no |
| CYP1B1    | 0.343954217  | 9.670695646  | 7.63E-21 | 1.34E-19 | no |
| LOC387646 | 0.343929931  | 9.669921224  | 7.68E-21 | 1.35E-19 | no |
| TRIM56    | 0.343876054  | 9.66820324   | 7.80E-21 | 1.37E-19 | no |
| C10orf55  | 0.34367869   | 9.661910858  | 8.23E-21 | 1.44E-19 | no |
| SLC16A13  | 0.34349462   | 9.656043584  | 8.66E-21 | 1.51E-19 | no |
| DDR2      | 0.343273175  | 9.64898668   | 9.20E-21 | 1.61E-19 | no |
| CFB       | 0.343265524  | 9.648742889  | 9.22E-21 | 1.61E-19 | no |
| CALHM1    | 0.343200615  | 9.646674762  | 9.39E-21 | 1.64E-19 | no |
| TNFSF14   | 0.342896011  | 9.636971565  | 1.02E-20 | 1.78E-19 | no |
| AQP9      | 0.342541524  | 9.625683696  | 1.12E-20 | 1.96E-19 | no |
| SELP      | 0.342423397  | 9.621923228  | 1.16E-20 | 2.02E-19 | no |
| COL1A2    | 0.34239921   | 9.621153329  | 1.17E-20 | 2.03E-19 | no |
| TXNDC5    | 0.342248251  | 9.616348582  | 1.22E-20 | 2.11E-19 | no |
| VIM       | 0.342178982  | 9.614144414  | 1.24E-20 | 2.15E-19 | no |
| ANO6      | 0.342118538  | 9.61222073   | 1.26E-20 | 2.19E-19 | no |
| TBC1D22A  | 0.342062004  | 9.610421836  | 1.28E-20 | 2.22E-19 | no |
| TTC7A     | 0.341905462  | 9.605441352  | 1.34E-20 | 2.31E-19 | no |
| TREM2     | 0.341890567  | 9.604967505  | 1.34E-20 | 2.32E-19 | no |
| FKBP5     | 0.341888239  | 9.604893454  | 1.34E-20 | 2.32E-19 | no |
| C1orf186  | 0.341660727  | 9.59765676   | 1.43E-20 | 2.47E-19 | no |



|           |              |              |          |          |    |
|-----------|--------------|--------------|----------|----------|----|
| SLC35A2   | 0.341222478  | 9.583722369  | 1.61E-20 | 2.78E-19 | no |
| C17orf69  | -0.341114047 | -9.580275829 | 1.66E-20 | 2.86E-19 | no |
| BACH1     | 0.341028763  | 9.577565335  | 1.70E-20 | 2.92E-19 | no |
| TPP1      | 0.34091834   | 9.574056254  | 1.75E-20 | 3.01E-19 | no |
| CCL22     | 0.34091075   | 9.573815082  | 1.75E-20 | 3.01E-19 | no |
| CABP4     | 0.340889492  | 9.573139584  | 1.76E-20 | 3.03E-19 | no |
| SLC25A30  | 0.34046276   | 9.559583412  | 1.98E-20 | 3.40E-19 | no |
| C1GALT1C1 | 0.340272816  | 9.553551509  | 2.08E-20 | 3.57E-19 | no |
| FUCA2     | 0.340263388  | 9.553252149  | 2.09E-20 | 3.58E-19 | no |
| HERPUD1   | 0.34015663   | 9.549862565  | 2.15E-20 | 3.68E-19 | no |
| WASF2     | 0.340132149  | 9.549085344  | 2.17E-20 | 3.70E-19 | no |
| SNX6      | 0.340129712  | 9.549007967  | 2.17E-20 | 3.70E-19 | no |
| TRAF5     | 0.34007991   | 9.547426914  | 2.20E-20 | 3.75E-19 | no |
| TNFSF12   | 0.340037611  | 9.546084153  | 2.22E-20 | 3.79E-19 | no |
| LAMB1     | 0.339928948  | 9.542634965  | 2.29E-20 | 3.90E-19 | no |
| PDLIM1    | 0.339848678  | 9.540087322  | 2.34E-20 | 3.98E-19 | no |
| STAP1     | 0.339680055  | 9.534736206  | 2.45E-20 | 4.16E-19 | no |
| PIP4K2B   | -0.339638432 | -9.533415522 | 2.48E-20 | 4.21E-19 | no |
| PHLPP1    | -0.339606848 | -9.532413375 | 2.50E-20 | 4.24E-19 | no |
| CLDN14    | 0.339380018  | 9.525217409  | 2.65E-20 | 4.50E-19 | no |
| ATP8B3    | 0.338983398  | 9.512639493  | 2.95E-20 | 5.01E-19 | no |
| TBKBP1    | -0.33894875  | -9.511540981 | 2.98E-20 | 5.05E-19 | no |
| KIAA0427  | -0.338946425 | -9.511467264 | 2.98E-20 | 5.05E-19 | no |
| UBASH3B   | 0.338714015  | 9.504099887  | 3.18E-20 | 5.37E-19 | no |
| GPHN      | -0.338708944 | -9.503939136 | 3.18E-20 | 5.37E-19 | no |
| TNFRSF11B | 0.338660207  | 9.502394432  | 3.22E-20 | 5.44E-19 | no |
| PPCS      | 0.338624775  | 9.501271486  | 3.25E-20 | 5.49E-19 | no |
| LGALS3BP  | 0.338578809  | 9.499814763  | 3.30E-20 | 5.55E-19 | no |
| GPR25     | 0.338387957  | 9.493767173  | 3.47E-20 | 5.84E-19 | no |
| IL2RA     | 0.338284608  | 9.49049285   | 3.57E-20 | 6.00E-19 | no |
| GAS6      | 0.338220497  | 9.488461882  | 3.63E-20 | 6.10E-19 | no |
| FURIN     | 0.338194153  | 9.487627379  | 3.65E-20 | 6.14E-19 | no |
| FGL1      | 0.33818927   | 9.487472703  | 3.66E-20 | 6.14E-19 | no |
| GSDMA     | 0.338131774  | 9.485651474  | 3.72E-20 | 6.23E-19 | no |
| RHOQ      | 0.338131362  | 9.485638442  | 3.72E-20 | 6.23E-19 | no |
| TAP2      | 0.338089714  | 9.484319284  | 3.76E-20 | 6.29E-19 | no |
| SERTAD3   | 0.337934425  | 9.479401256  | 3.92E-20 | 6.55E-19 | no |
| PATZ1     | -0.337537512 | -9.466834904 | 4.36E-20 | 7.29E-19 | no |
| TMEM71    | 0.337495575  | 9.465507475  | 4.41E-20 | 7.36E-19 | no |
| LHFPL4    | -0.337457244 | -9.464294274 | 4.45E-20 | 7.43E-19 | no |
| RAG1AP1   | 0.337441403  | 9.463792917  | 4.47E-20 | 7.46E-19 | no |
| FCGBP     | 0.337374035  | 9.461660843  | 4.56E-20 | 7.59E-19 | no |
| FAM157B   | 0.337362075  | 9.461282339  | 4.57E-20 | 7.60E-19 | no |
| GBP2      | 0.337320455  | 9.459965244  | 4.62E-20 | 7.68E-19 | no |
| TMEM127   | 0.337230279  | 9.457111738  | 4.73E-20 | 7.87E-19 | no |
| TMEM214   | 0.33722738   | 9.457020016  | 4.74E-20 | 7.87E-19 | no |
| MYO1E     | 0.337211375  | 9.456513579  | 4.76E-20 | 7.89E-19 | no |
| GSTA4     | -0.3370829   | -9.452448759 | 4.93E-20 | 8.16E-19 | no |
| TMEM145   | -0.337074528 | -9.452183901 | 4.94E-20 | 8.17E-19 | no |
| NEAT1     | 0.337012024  | 9.450206581  | 5.02E-20 | 8.31E-19 | no |
| ALDH5A1   | -0.336836672 | -9.444660041 | 5.26E-20 | 8.70E-19 | no |

|           |              |              |          |          |    |
|-----------|--------------|--------------|----------|----------|----|
| RUFY3     | -0.336660951 | -9.439102952 | 5.51E-20 | 9.11E-19 | no |
| ZNF821    | -0.336451873 | -9.432492387 | 5.83E-20 | 9.62E-19 | no |
| ELMOD2    | 0.336446479  | 9.432321867  | 5.84E-20 | 9.63E-19 | no |
| GDI1      | -0.336350323 | -9.429282198 | 5.99E-20 | 9.87E-19 | no |
| THRA      | -0.336347495 | -9.429192787 | 6.00E-20 | 9.87E-19 | no |
| CTSK      | 0.336071237  | 9.420461629  | 6.46E-20 | 1.06E-18 | no |
| PKD2      | 0.335581831  | 9.405000582  | 7.36E-20 | 1.21E-18 | no |
| MPP1      | 0.335531773  | 9.403419677  | 7.45E-20 | 1.22E-18 | no |
| SLC16A5   | 0.335511651  | 9.402784213  | 7.49E-20 | 1.23E-18 | no |
| SLC40A1   | 0.335291918  | 9.39584587   | 7.95E-20 | 1.30E-18 | no |
| EMILIN2   | 0.33516377   | 9.391800244  | 8.22E-20 | 1.35E-18 | no |
| ZFP36L2   | 0.33501253   | 9.38702635   | 8.56E-20 | 1.40E-18 | no |
| ICOSLG    | 0.334884034  | 9.382971032  | 8.86E-20 | 1.45E-18 | no |
| IGFBP4    | 0.334827616  | 9.381190673  | 8.99E-20 | 1.47E-18 | no |
| USP15     | 0.334808342  | 9.380582487  | 9.04E-20 | 1.48E-18 | no |
| CRTC1     | -0.334750753 | -9.378765308 | 9.18E-20 | 1.50E-18 | no |
| CNRIP1    | -0.334721397 | -9.377839068 | 9.25E-20 | 1.51E-18 | no |
| CEBPE     | 0.334718826  | 9.377757936  | 9.25E-20 | 1.51E-18 | no |
| MYCBP     | 0.334547955  | 9.37236718   | 9.68E-20 | 1.58E-18 | no |
| TRIM5     | 0.334483676  | 9.370339538  | 9.85E-20 | 1.60E-18 | no |
| LAMC1     | 0.334443844  | 9.369083132  | 9.96E-20 | 1.62E-18 | no |
| TMEM39A   | 0.33438581   | 9.36725268   | 1.01E-19 | 1.64E-18 | no |
| APOL1     | 0.334352503  | 9.366202202  | 1.02E-19 | 1.66E-18 | no |
| TNS4      | 0.333921502  | 9.352612265  | 1.14E-19 | 1.85E-18 | no |
| TSPO      | 0.333751991  | 9.347269227  | 1.20E-19 | 1.94E-18 | no |
| PRPS2     | 0.333697076  | 9.345538513  | 1.21E-19 | 1.96E-18 | no |
| ANXA2P1   | 0.333670351  | 9.344696265  | 1.22E-19 | 1.98E-18 | no |
| MUM1      | -0.333555488 | -9.341076642 | 1.26E-19 | 2.04E-18 | no |
| FAM167B   | 0.333553832  | 9.341024487  | 1.26E-19 | 2.04E-18 | no |
| BGN       | 0.333503005  | 9.339422949  | 1.28E-19 | 2.06E-18 | no |
| LAPTM4A   | 0.333430755  | 9.337146546  | 1.30E-19 | 2.10E-18 | no |
| NEURL4    | -0.333397613 | -9.336102405 | 1.31E-19 | 2.12E-18 | no |
| BCL10     | 0.333332045  | 9.334036754  | 1.34E-19 | 2.15E-18 | no |
| FAM171A2  | -0.333303209 | -9.333128381 | 1.35E-19 | 2.17E-18 | no |
| LOC606724 | 0.333135042  | 9.327831371  | 1.41E-19 | 2.26E-18 | no |
| TGM2      | 0.333021943  | 9.324269497  | 1.45E-19 | 2.33E-18 | no |
| DI01      | 0.332950452  | 9.322018218  | 1.48E-19 | 2.37E-18 | no |
| FKBP11    | 0.332939914  | 9.321686405  | 1.48E-19 | 2.38E-18 | no |
| CD55      | 0.332921559  | 9.321108422  | 1.49E-19 | 2.39E-18 | no |
| KDELC2    | 0.332896756  | 9.320327451  | 1.50E-19 | 2.40E-18 | no |
| CCL13     | 0.33286122   | 9.319208555  | 1.51E-19 | 2.42E-18 | no |
| APOBEC3A  | 0.332829128  | 9.318198103  | 1.53E-19 | 2.44E-18 | no |
| CDCP1     | 0.332752645  | 9.315790176  | 1.56E-19 | 2.49E-18 | no |
| AMPD3     | 0.332741375  | 9.315435366  | 1.56E-19 | 2.49E-18 | no |
| ALG12     | 0.332696587  | 9.314025418  | 1.58E-19 | 2.52E-18 | no |
| ATG7      | 0.332634225  | 9.312062326  | 1.61E-19 | 2.56E-18 | no |
| ZFYVE20   | -0.332621758 | -9.311669892 | 1.61E-19 | 2.57E-18 | no |
| SOD2      | 0.3325842    | 9.310487698  | 1.63E-19 | 2.59E-18 | no |
| AXL       | 0.332542277  | 9.309168167  | 1.65E-19 | 2.62E-18 | no |
| PARP2     | -0.332489431 | -9.307504918 | 1.67E-19 | 2.65E-18 | no |
| GNG12     | 0.332477654  | 9.307134248  | 1.67E-19 | 2.66E-18 | no |

|           |              |              |          |          |    |
|-----------|--------------|--------------|----------|----------|----|
| DCN       | 0.332342342  | 9.302876021  | 1.74E-19 | 2.75E-18 | no |
| LILRA1    | 0.332267647  | 9.300525647  | 1.77E-19 | 2.80E-18 | no |
| KDELR3    | 0.332235609  | 9.299517594  | 1.78E-19 | 2.83E-18 | no |
| ANKRD13B  | -0.332183554 | -9.297879802 | 1.81E-19 | 2.86E-18 | no |
| BRSK2     | -0.332145803 | -9.296692098 | 1.83E-19 | 2.89E-18 | no |
| PHF11     | 0.331977782  | 9.291407759  | 1.91E-19 | 3.02E-18 | no |
| PROCR     | 0.331581352  | 9.278939783  | 2.12E-19 | 3.35E-18 | no |
| AP2B1     | -0.331312455 | -9.270486727 | 2.27E-19 | 3.59E-18 | no |
| TAPBPL    | 0.331262272  | 9.268909469  | 2.30E-19 | 3.63E-18 | no |
| ARHGAP29  | 0.331126997  | 9.264658163  | 2.39E-19 | 3.76E-18 | no |
| CD300E    | 0.331099691  | 9.263800097  | 2.41E-19 | 3.78E-18 | no |
| RGS1      | 0.330998055  | 9.260606504  | 2.47E-19 | 3.88E-18 | no |
| FPR2      | 0.33089349   | 9.257321225  | 2.54E-19 | 3.99E-18 | no |
| FOSL2     | 0.330843628  | 9.255754776  | 2.57E-19 | 4.04E-18 | no |
| MAN1C1    | 0.330740777  | 9.252523916  | 2.64E-19 | 4.14E-18 | no |
| PROS1     | 0.33071284   | 9.251646384  | 2.66E-19 | 4.17E-18 | no |
| MITF      | 0.33044931   | 9.243370076  | 2.85E-19 | 4.47E-18 | no |
| RNASE3    | 0.330302532  | 9.238761471  | 2.96E-19 | 4.64E-18 | no |
| C9orf95   | 0.330288652  | 9.238325717  | 2.97E-19 | 4.65E-18 | no |
| BLNK      | 0.330259779  | 9.237419227  | 3.00E-19 | 4.68E-18 | no |
| C1orf84   | 0.330169868  | 9.234596674  | 3.07E-19 | 4.79E-18 | no |
| WARS      | 0.330037054  | 9.230427799  | 3.18E-19 | 4.95E-18 | no |
| PPP1R3B   | 0.330022681  | 9.229976666  | 3.19E-19 | 4.97E-18 | no |
| DUSP26    | -0.330000402 | -9.229277439 | 3.21E-19 | 4.99E-18 | no |
| DPYSL4    | -0.329899881 | -9.226122729 | 3.29E-19 | 5.12E-18 | no |
| HPS1      | 0.329727198  | 9.220704121  | 3.44E-19 | 5.36E-18 | no |
| SLC33A1   | 0.3296352    | 9.217817766  | 3.53E-19 | 5.48E-18 | no |
| RNPEP     | 0.329631308  | 9.217695653  | 3.53E-19 | 5.48E-18 | no |
| HEATR3    | 0.329575407  | 9.215941959  | 3.58E-19 | 5.56E-18 | no |
| FXR2      | -0.329528996 | -9.21448606  | 3.63E-19 | 5.62E-18 | no |
| C20orf197 | 0.329466269  | 9.212518432  | 3.69E-19 | 5.71E-18 | no |
| DNAJC5B   | 0.329412907  | 9.210844696  | 3.74E-19 | 5.79E-18 | no |
| SHISA7    | -0.32931375  | -9.207734828 | 3.84E-19 | 5.93E-18 | no |
| LILRA3    | 0.329140688  | 9.202307862  | 4.01E-19 | 6.20E-18 | no |
| PTCHD3    | 0.329089623  | 9.200706756  | 4.07E-19 | 6.28E-18 | no |
| IFITM3    | 0.328882567  | 9.194215532  | 4.29E-19 | 6.62E-18 | no |
| FAM120A   | 0.328757306  | 9.19028931   | 4.43E-19 | 6.84E-18 | no |
| LCTL      | 0.328615462  | 9.185843959  | 4.60E-19 | 7.09E-18 | no |
| VPS4A     | -0.328580265 | -9.184741017 | 4.64E-19 | 7.15E-18 | no |
| ITGB3     | 0.328530882  | 9.18319359   | 4.70E-19 | 7.23E-18 | no |
| DNAJC3    | 0.328328461  | 9.176851568  | 4.95E-19 | 7.62E-18 | no |
| KLF11     | 0.328278432  | 9.175284346  | 5.02E-19 | 7.71E-18 | no |
| BAK1      | 0.327999737  | 9.166555418  | 5.40E-19 | 8.28E-18 | no |
| FAP       | 0.327947891  | 9.164931856  | 5.47E-19 | 8.39E-18 | no |
| C4orf32   | 0.327934342  | 9.164507601  | 5.49E-19 | 8.41E-18 | no |
| SS18L1    | -0.327898207 | -9.163376092 | 5.54E-19 | 8.48E-18 | no |
| GLRX      | 0.32776638   | 9.15924856   | 5.73E-19 | 8.77E-18 | no |
| IL18RAP   | 0.327709664  | 9.157472983  | 5.82E-19 | 8.90E-18 | no |
| ARFIP1    | 0.327397376  | 9.147698197  | 6.31E-19 | 9.64E-18 | no |
| CATSPER1  | 0.327327694  | 9.145517577  | 6.42E-19 | 9.80E-18 | no |
| KBTBD6    | -0.32731715  | -9.145187598 | 6.44E-19 | 9.82E-18 | no |

|          |              |              |          |             |
|----------|--------------|--------------|----------|-------------|
| PRR13    | 0.327157065  | 9.140178617  | 6.71E-19 | 1.02E-17 no |
| OLR1     | 0.327097585  | 9.138317712  | 6.81E-19 | 1.04E-17 no |
| ADAM9    | 0.326894736  | 9.131972329  | 7.18E-19 | 1.09E-17 no |
| WDR1     | 0.326874024  | 9.131324512  | 7.22E-19 | 1.10E-17 no |
| PIGT     | 0.32684831   | 9.130520253  | 7.27E-19 | 1.10E-17 no |
| ARPC5    | 0.326805186  | 9.129171538  | 7.35E-19 | 1.12E-17 no |
| C17orf66 | 0.32673578   | 9.127000977  | 7.48E-19 | 1.14E-17 no |
| KCNJ5    | 0.326687192  | 9.12548154   | 7.58E-19 | 1.15E-17 no |
| EHMT2    | -0.326672413 | -9.125019384 | 7.60E-19 | 1.15E-17 no |
| SLC2A10  | 0.326607111  | 9.122977463  | 7.73E-19 | 1.17E-17 no |
| SIGLEC11 | 0.326526353  | 9.120452429  | 7.90E-19 | 1.19E-17 no |
| TOR1B    | 0.326491454  | 9.119361334  | 7.97E-19 | 1.20E-17 no |
| SRGAP3   | -0.326325248 | -9.114165512 | 8.32E-19 | 1.26E-17 no |
| YIPF1    | 0.326322686  | 9.114085445  | 8.32E-19 | 1.26E-17 no |
| CD274    | 0.326221323  | 9.110917181  | 8.54E-19 | 1.29E-17 no |
| VAMP3    | 0.326219726  | 9.110867267  | 8.54E-19 | 1.29E-17 no |
| MORN4    | -0.32620206  | -9.11031514  | 8.58E-19 | 1.29E-17 no |
| KHNYN    | 0.32603502   | 9.105094908  | 8.96E-19 | 1.35E-17 no |
| AKAP2    | 0.325974918  | 9.103216886  | 9.10E-19 | 1.37E-17 no |
| LIMS1    | 0.325947515  | 9.102360651  | 9.16E-19 | 1.38E-17 no |
| ACVR1    | 0.325872544  | 9.100018251  | 9.34E-19 | 1.40E-17 no |
| CAPZB    | 0.325850914  | 9.099342473  | 9.40E-19 | 1.41E-17 no |
| CSF2RA   | 0.325830926  | 9.098718014  | 9.44E-19 | 1.42E-17 no |
| HTATIP2  | 0.325724464  | 9.095392197  | 9.71E-19 | 1.45E-17 no |
| ZCCHC6   | 0.325686075  | 9.094193043  | 9.80E-19 | 1.47E-17 no |
| 3-Sep    | -0.325616199 | -9.092010438 | 9.98E-19 | 1.49E-17 no |
| YIPF5    | 0.325288722  | 9.081783804  | 1.09E-18 | 1.62E-17 no |
| SOAT2    | 0.32525544   | 9.080744663  | 1.09E-18 | 1.64E-17 no |
| SLC22A17 | -0.325246363 | -9.080461269 | 1.10E-18 | 1.64E-17 no |
| HLA-G    | 0.325055569  | 9.074505009  | 1.15E-18 | 1.72E-17 no |
| IL27     | 0.324919037  | 9.070243477  | 1.19E-18 | 1.78E-17 no |
| ACTN1    | 0.32491628   | 9.070157435  | 1.19E-18 | 1.78E-17 no |
| GNAO1    | -0.324605571 | -9.060461769 | 1.29E-18 | 1.93E-17 no |
| GMPPB    | 0.324589086  | 9.059947451  | 1.30E-18 | 1.93E-17 no |
| PRR15    | 0.324533549  | 9.058214787  | 1.32E-18 | 1.96E-17 no |
| C6orf134 | -0.324523261 | -9.057893851 | 1.32E-18 | 1.96E-17 no |
| IFNGR1   | 0.324389627  | 9.053725186  | 1.37E-18 | 2.03E-17 no |
| HLA-C    | 0.324380957  | 9.05345474   | 1.37E-18 | 2.03E-17 no |
| SH3KBP1  | 0.324302972  | 9.051022335  | 1.40E-18 | 2.07E-17 no |
| TNFRSF4  | 0.324295954  | 9.050803452  | 1.40E-18 | 2.07E-17 no |
| CACNG7   | -0.324264128 | -9.049810842 | 1.41E-18 | 2.09E-17 no |
| MTA3     | -0.32416511  | -9.046722823 | 1.45E-18 | 2.14E-17 no |
| DPP6     | -0.324136837 | -9.045841131 | 1.46E-18 | 2.15E-17 no |
| VPREB3   | 0.324047118  | 9.043043498  | 1.49E-18 | 2.20E-17 no |
| GPX1     | 0.324016005  | 9.042073403  | 1.50E-18 | 2.22E-17 no |
| C15orf48 | 0.324004469  | 9.041713723  | 1.51E-18 | 2.22E-17 no |
| HCG26    | 0.323967509  | 9.040561329  | 1.52E-18 | 2.24E-17 no |
| PDIA3    | 0.323909931  | 9.038766218  | 1.54E-18 | 2.27E-17 no |
| ZNF101   | 0.323873114  | 9.037618438  | 1.56E-18 | 2.29E-17 no |
| ARRB2    | 0.323848417  | 9.036848523  | 1.57E-18 | 2.30E-17 no |
| TSPAN4   | 0.323847631  | 9.036824027  | 1.57E-18 | 2.30E-17 no |

|             |              |              |          |             |
|-------------|--------------|--------------|----------|-------------|
| AGTRAP      | 0.323846794  | 9.036797924  | 1.57E-18 | 2.30E-17 no |
| DYRK3       | 0.323679021  | 9.031568265  | 1.64E-18 | 2.40E-17 no |
| ZNF711      | -0.323631018 | -9.030072126 | 1.66E-18 | 2.43E-17 no |
| TBX19       | 0.323506754  | 9.026199496  | 1.71E-18 | 2.51E-17 no |
| COL18A1     | 0.323492161  | 9.025744731  | 1.72E-18 | 2.52E-17 no |
| C17orf44    | 0.323327249  | 9.020606213  | 1.79E-18 | 2.62E-17 no |
| FAM20C      | 0.323327237  | 9.020605828  | 1.79E-18 | 2.62E-17 no |
| CSNK1E      | -0.322925542 | -9.00809319  | 1.99E-18 | 2.90E-17 no |
| USO1        | 0.32290303   | 9.007392111  | 2.00E-18 | 2.91E-17 no |
| SBN02       | 0.322844037  | 9.005555005  | 2.03E-18 | 2.96E-17 no |
| ABCD1       | 0.322799996  | 9.004183577  | 2.05E-18 | 2.99E-17 no |
| SEC22B      | 0.322751972  | 9.00268821   | 2.07E-18 | 3.02E-17 no |
| PSAP        | 0.322748305  | 9.002574041  | 2.08E-18 | 3.02E-17 no |
| FCHSD1      | 0.32266731   | 9.000052236  | 2.12E-18 | 3.08E-17 no |
| IL21        | 0.322666742  | 9.000034531  | 2.12E-18 | 3.08E-17 no |
| PODXL       | 0.322434419  | 8.992802271  | 2.25E-18 | 3.27E-17 no |
| TAPBP       | 0.32232541   | 8.989409414  | 2.31E-18 | 3.36E-17 no |
| MATR3       | -0.322236015 | -8.986627319 | 2.36E-18 | 3.43E-17 no |
| CIDEB       | 0.322170531  | 8.98458957   | 2.40E-18 | 3.48E-17 no |
| SERPINH1    | 0.322149559  | 8.983936971  | 2.42E-18 | 3.50E-17 no |
| GATS        | -0.321983629 | -8.97877424  | 2.52E-18 | 3.65E-17 no |
| PSMB9       | 0.321963569  | 8.978150142  | 2.53E-18 | 3.66E-17 no |
| SLC39A8     | 0.3218559    | 8.974800705  | 2.60E-18 | 3.76E-17 no |
| PDIA3P      | 0.321781727  | 8.972493508  | 2.65E-18 | 3.83E-17 no |
| EDEM2       | 0.321724311  | 8.970707658  | 2.69E-18 | 3.89E-17 no |
| SFRP4       | 0.321689953  | 8.969639049  | 2.72E-18 | 3.92E-17 no |
| ARPC3       | 0.321529845  | 8.964659891  | 2.83E-18 | 4.08E-17 no |
| FAM82A1     | 0.321410769  | 8.960957364  | 2.91E-18 | 4.20E-17 no |
| DDX60       | 0.32138431   | 8.960134704  | 2.93E-18 | 4.22E-17 no |
| CDH10       | -0.321315667 | -8.958000585 | 2.99E-18 | 4.29E-17 no |
| OSTM1       | 0.321078381  | 8.950624586  | 3.17E-18 | 4.56E-17 no |
| MAP2        | -0.32104432  | -8.949565936 | 3.20E-18 | 4.59E-17 no |
| C17orf100   | -0.321010932 | -8.948528265 | 3.22E-18 | 4.63E-17 no |
| C5orf15     | 0.320992229  | 8.947947005  | 3.24E-18 | 4.65E-17 no |
| SLC12A7     | 0.320938466  | 8.946276207  | 3.28E-18 | 4.71E-17 no |
| THBD        | 0.32086183   | 8.943894741  | 3.35E-18 | 4.79E-17 no |
| HSPG2       | 0.320639284  | 8.936980239  | 3.54E-18 | 5.07E-17 no |
| BEX1        | -0.320432038 | -8.930542605 | 3.73E-18 | 5.34E-17 no |
| A4GALT      | 0.32033257   | 8.927453342  | 3.83E-18 | 5.47E-17 no |
| SUMO1P1     | 0.320327889  | 8.927307987  | 3.83E-18 | 5.47E-17 no |
| BAI3        | -0.320264288 | -8.925332849 | 3.89E-18 | 5.55E-17 no |
| SSH2        | 0.320187463  | 8.922947247  | 3.97E-18 | 5.66E-17 no |
| RAB32       | 0.320159843  | 8.922089607  | 4.00E-18 | 5.69E-17 no |
| PVRL2       | 0.320126519  | 8.92105493   | 4.03E-18 | 5.74E-17 no |
| CMTM3       | 0.320118693  | 8.920811913  | 4.04E-18 | 5.74E-17 no |
| ITGAX       | 0.319995615  | 8.916990718  | 4.16E-18 | 5.92E-17 no |
| TUB         | -0.319923167 | -8.914741685 | 4.24E-18 | 6.03E-17 no |
| RIC3        | -0.319914328 | -8.914467307 | 4.25E-18 | 6.04E-17 no |
| PALM2-AKAP2 | 0.319824091  | 8.911666264  | 4.35E-18 | 6.17E-17 no |
| FOXL1       | 0.3196842    | 8.907324493  | 4.50E-18 | 6.39E-17 no |
| ZG16B       | 0.319590311  | 8.904410825  | 4.61E-18 | 6.53E-17 no |

|           |              |              |          |             |
|-----------|--------------|--------------|----------|-------------|
| GPSM1     | -0.319462739 | -8.900452356 | 4.76E-18 | 6.74E-17 no |
| PARP8     | 0.319331172  | 8.896370504  | 4.92E-18 | 6.96E-17 no |
| FAM57B    | -0.319238227 | -8.893487207 | 5.04E-18 | 7.12E-17 no |
| RALB      | 0.319177772  | 8.891611988  | 5.11E-18 | 7.23E-17 no |
| LILRP2    | 0.319122624  | 8.889901469  | 5.19E-18 | 7.32E-17 no |
| TNFRSF6B  | 0.319099185  | 8.889174489  | 5.22E-18 | 7.36E-17 no |
| LYSMD3    | 0.319022439  | 8.886794304  | 5.32E-18 | 7.50E-17 no |
| GLB1L     | 0.31884243   | 8.881212271  | 5.56E-18 | 7.84E-17 no |
| FXVD6     | -0.318817863 | -8.880450531 | 5.60E-18 | 7.88E-17 no |
| PSMB10    | 0.318808241  | 8.880152203  | 5.61E-18 | 7.89E-17 no |
| FAM49B    | 0.318748683  | 8.878305616  | 5.69E-18 | 8.00E-17 no |
| CHPF2     | 0.31874822   | 8.878291283  | 5.70E-18 | 8.00E-17 no |
| PCYT1A    | 0.31872759   | 8.877651691  | 5.72E-18 | 8.04E-17 no |
| TNRC6C    | -0.318711895 | -8.87716509  | 5.75E-18 | 8.06E-17 no |
| ZNF853    | -0.318629349 | -8.874606084 | 5.87E-18 | 8.23E-17 no |
| DCBLD2    | 0.3185128    | 8.870993331  | 6.04E-18 | 8.46E-17 no |
| LEPROT    | 0.318503814  | 8.870714785  | 6.05E-18 | 8.48E-17 no |
| RAB11FIP1 | 0.318489553  | 8.870272761  | 6.08E-18 | 8.50E-17 no |
| IFITM1    | 0.318418927  | 8.868083787  | 6.18E-18 | 8.65E-17 no |
| KIAA0020  | 0.318354627  | 8.866091035  | 6.28E-18 | 8.78E-17 no |
| ZMPSTE24  | 0.318349269  | 8.86592499   | 6.29E-18 | 8.79E-17 no |
| TMSL3     | 0.318329447  | 8.865310706  | 6.32E-18 | 8.82E-17 no |
| GUSB      | 0.3181222    | 8.858888877  | 6.66E-18 | 9.29E-17 no |
| MX2       | 0.317980918  | 8.854511856  | 6.90E-18 | 9.61E-17 no |
| PML       | 0.317908872  | 8.852280082  | 7.02E-18 | 9.78E-17 no |
| DDX51     | -0.317908476 | -8.852267815 | 7.03E-18 | 9.78E-17 no |
| HDAC7     | 0.317898134  | 8.851947453  | 7.04E-18 | 9.79E-17 no |
| MYADM     | 0.317883088  | 8.851481397  | 7.07E-18 | 9.82E-17 no |
| MAST1     | -0.317755743 | -8.847537155 | 7.30E-18 | 1.01E-16 no |
| SLC6A6    | 0.31770043   | 8.845824084  | 7.40E-18 | 1.03E-16 no |
| BCAN      | -0.317613302 | -8.843125934 | 7.56E-18 | 1.05E-16 no |
| C8orf4    | 0.317546435  | 8.841055385  | 7.69E-18 | 1.07E-16 no |
| MTSS1L    | -0.317536305 | -8.840741729 | 7.71E-18 | 1.07E-16 no |
| GPM6A     | -0.317488996 | -8.839276902 | 7.80E-18 | 1.08E-16 no |
| SHMT1     | 0.317480835  | 8.839024234  | 7.82E-18 | 1.08E-16 no |
| DAP       | 0.317271383  | 8.832539914  | 8.23E-18 | 1.14E-16 no |
| LMNA      | 0.317221735  | 8.831003106  | 8.34E-18 | 1.15E-16 no |
| RNLS      | 0.317216163  | 8.830830625  | 8.35E-18 | 1.15E-16 no |
| HTRA3     | 0.317133493  | 8.828271824  | 8.52E-18 | 1.18E-16 no |
| FBN1      | 0.31705131   | 8.825728335  | 8.70E-18 | 1.20E-16 no |
| ATG4A     | 0.317032523  | 8.825146943  | 8.74E-18 | 1.20E-16 no |
| NOL4      | -0.317024903 | -8.824911103 | 8.76E-18 | 1.21E-16 no |
| RRAS      | 0.317017195  | 8.824672558  | 8.77E-18 | 1.21E-16 no |
| ABI2      | -0.316935894 | -8.822156677 | 8.95E-18 | 1.23E-16 no |
| KDELR2    | 0.316782182  | 8.817400596  | 9.30E-18 | 1.28E-16 no |
| FGD3      | 0.316758249  | 8.81666013   | 9.36E-18 | 1.28E-16 no |
| DCUN1D2   | -0.316679457 | -8.814222545 | 9.54E-18 | 1.31E-16 no |
| TMEM43    | 0.316583136  | 8.811242949  | 9.77E-18 | 1.34E-16 no |
| ITSN2     | 0.316573122  | 8.810933187  | 9.80E-18 | 1.34E-16 no |
| CYP27A1   | 0.316537387  | 8.809827848  | 9.88E-18 | 1.35E-16 no |
| HSD17B11  | 0.316422169  | 8.806264273  | 1.02E-17 | 1.39E-16 no |

|           |              |              |          |          |    |
|-----------|--------------|--------------|----------|----------|----|
| COL3A1    | 0.316375495  | 8.804820783  | 1.03E-17 | 1.41E-16 | no |
| SHQ1      | 0.316363811  | 8.804459451  | 1.03E-17 | 1.41E-16 | no |
| STK3      | 0.316353166  | 8.80413026   | 1.03E-17 | 1.41E-16 | no |
| CELA1     | 0.316248021  | 8.80087882   | 1.06E-17 | 1.45E-16 | no |
| PAFAH2    | 0.316080351  | 8.795694669  | 1.11E-17 | 1.51E-16 | no |
| NR1I2     | 0.316076741  | 8.795583065  | 1.11E-17 | 1.51E-16 | no |
| ZNF554    | -0.316073774 | -8.795491335 | 1.11E-17 | 1.51E-16 | no |
| KIAA1274  | 0.316035376  | 8.794304247  | 1.12E-17 | 1.52E-16 | no |
| TMC04     | 0.315996419  | 8.79309992   | 1.13E-17 | 1.54E-16 | no |
| PCOLCE    | 0.315903413  | 8.790224928  | 1.16E-17 | 1.57E-16 | no |
| SFRS13B   | -0.315719661 | -8.784545632 | 1.21E-17 | 1.64E-16 | no |
| PANK2     | 0.31562569   | 8.78164166   | 1.24E-17 | 1.68E-16 | no |
| FAM114A2  | 0.315575895  | 8.780102982  | 1.25E-17 | 1.70E-16 | no |
| CSRP2BP   | -0.315560955 | -8.77964134  | 1.26E-17 | 1.71E-16 | no |
| TPD52L2   | 0.315480549  | 8.77715696   | 1.28E-17 | 1.74E-16 | no |
| SLC38A9   | 0.315479571  | 8.777126741  | 1.28E-17 | 1.74E-16 | no |
| C3orf52   | 0.315302207  | 8.771647312  | 1.34E-17 | 1.81E-16 | no |
| C22orf39  | -0.315237151 | -8.769637753 | 1.36E-17 | 1.84E-16 | no |
| LRRC37B   | -0.315019116 | -8.762903687 | 1.44E-17 | 1.94E-16 | no |
| RALGPS1   | -0.315016184 | -8.762813136 | 1.44E-17 | 1.94E-16 | no |
| LRCH2     | -0.314893661 | -8.759029704 | 1.48E-17 | 2.00E-16 | no |
| CD1B      | 0.314875177  | 8.758458949  | 1.49E-17 | 2.01E-16 | no |
| HAMP      | 0.314783562  | 8.755630293  | 1.53E-17 | 2.05E-16 | no |
| FBLIM1    | 0.31469593   | 8.752924876  | 1.56E-17 | 2.10E-16 | no |
| TSPAN7    | -0.314662536 | -8.75189398  | 1.57E-17 | 2.11E-16 | no |
| SOCS1     | 0.314639966  | 8.751197238  | 1.58E-17 | 2.12E-16 | no |
| SPIRE1    | -0.314564639 | -8.748872028 | 1.61E-17 | 2.16E-16 | no |
| TMEM150A  | 0.314532019  | 8.74786517   | 1.62E-17 | 2.18E-16 | no |
| SEPHS2    | 0.314479172  | 8.746234044  | 1.64E-17 | 2.21E-16 | no |
| FSD1      | -0.314459842 | -8.745637437 | 1.65E-17 | 2.21E-16 | no |
| TNFRSF10B | 0.31443536   | 8.744881848  | 1.66E-17 | 2.23E-16 | no |
| LILRA5    | 0.314313063  | 8.741107684  | 1.71E-17 | 2.29E-16 | no |
| MYBPC3    | 0.314292756  | 8.74048104   | 1.72E-17 | 2.30E-16 | no |
| SIGLEC15  | 0.314239172  | 8.738827585  | 1.74E-17 | 2.33E-16 | no |
| PTPN12    | 0.314227491  | 8.738467123  | 1.75E-17 | 2.34E-16 | no |
| CPD       | 0.314122476  | 8.735226973  | 1.80E-17 | 2.40E-16 | no |
| PHF21B    | -0.314101471 | -8.734578909 | 1.80E-17 | 2.41E-16 | no |
| ETF1      | 0.313972942  | 8.730613789  | 1.86E-17 | 2.48E-16 | no |
| TTC38     | 0.313817828  | 8.725829269  | 1.93E-17 | 2.58E-16 | no |
| ACVR2B    | -0.313711501 | -8.722550021 | 1.99E-17 | 2.65E-16 | no |
| RRAGB     | -0.313607098 | -8.719330453 | 2.04E-17 | 2.71E-16 | no |
| TMEM170B  | -0.313508971 | -8.716304768 | 2.09E-17 | 2.78E-16 | no |
| CR2       | 0.313426055  | 8.713748319  | 2.13E-17 | 2.83E-16 | no |
| PLA2G4A   | 0.313409539  | 8.713239134  | 2.14E-17 | 2.84E-16 | no |
| KIR3DL1   | 0.313099137  | 8.703671084  | 2.31E-17 | 3.06E-16 | no |
| CRMP1     | -0.312981039 | -8.700031558 | 2.38E-17 | 3.15E-16 | no |
| OLIG2     | -0.3129739   | -8.699811565 | 2.38E-17 | 3.16E-16 | no |
| TRIP4     | 0.312936769  | 8.698667362  | 2.40E-17 | 3.18E-16 | no |
| FZD1      | 0.312798691  | 8.694412854  | 2.48E-17 | 3.29E-16 | no |
| C2orf18   | 0.312745742  | 8.692781543  | 2.52E-17 | 3.33E-16 | no |
| GPC6      | 0.312725586  | 8.692160579  | 2.53E-17 | 3.34E-16 | no |

|          |              |              |          |          |    |
|----------|--------------|--------------|----------|----------|----|
| NFE2L2   | 0.312720834  | 8.692014192  | 2.53E-17 | 3.35E-16 | no |
| CASC3    | -0.312718882 | -8.691954036 | 2.53E-17 | 3.35E-16 | no |
| KDM4B    | -0.312691534 | -8.691111529 | 2.55E-17 | 3.37E-16 | no |
| RNASEL   | 0.312621067  | 8.688940759  | 2.59E-17 | 3.42E-16 | no |
| KLF6     | 0.312563636  | 8.687171694  | 2.63E-17 | 3.47E-16 | no |
| RFTN2    | -0.312394062 | -8.681948825 | 2.74E-17 | 3.61E-16 | no |
| CD248    | 0.312324011  | 8.679791539  | 2.79E-17 | 3.67E-16 | no |
| PCK2     | 0.312305853  | 8.679232372  | 2.80E-17 | 3.69E-16 | no |
| TTBK1    | -0.312282475 | -8.678512467 | 2.82E-17 | 3.70E-16 | no |
| KRT36    | 0.31217208   | 8.675113211  | 2.90E-17 | 3.80E-16 | no |
| FAM19A5  | -0.312119968 | -8.673508715 | 2.93E-17 | 3.85E-16 | no |
| LRRC20   | -0.311989767 | -8.669500293 | 3.03E-17 | 3.97E-16 | no |
| FAM3B    | 0.311952469  | 8.66835212   | 3.05E-17 | 4.01E-16 | no |
| MBNL3    | 0.311895474  | 8.666597713  | 3.10E-17 | 4.06E-16 | no |
| TTC39B   | 0.311879117  | 8.666094209  | 3.11E-17 | 4.07E-16 | no |
| MGAT2    | 0.311809286  | 8.663944839  | 3.16E-17 | 4.14E-16 | no |
| ZCCHC14  | -0.311732969 | -8.661596033 | 3.22E-17 | 4.21E-16 | no |
| ZNF552   | 0.311716349  | 8.661084534  | 3.24E-17 | 4.23E-16 | no |
| CLCF1    | 0.311669668  | 8.659647928  | 3.27E-17 | 4.27E-16 | no |
| CISH     | 0.311651712  | 8.659095354  | 3.29E-17 | 4.29E-16 | no |
| CRY2     | -0.311649653 | -8.659031986 | 3.29E-17 | 4.29E-16 | no |
| C21orf96 | 0.311647463  | 8.658964616  | 3.29E-17 | 4.29E-16 | no |
| PODXL2   | -0.311645229 | -8.658895862 | 3.29E-17 | 4.29E-16 | no |
| LGALS1   | 0.311611156  | 8.657847338  | 3.32E-17 | 4.32E-16 | no |
| FCGR3B   | 0.311563773  | 8.65638929   | 3.36E-17 | 4.37E-16 | no |
| COL1A1   | 0.311488352  | 8.654068636  | 3.42E-17 | 4.45E-16 | no |
| SLC30A6  | 0.311333659  | 8.649309398  | 3.55E-17 | 4.62E-16 | no |
| ARL5A    | 0.311297918  | 8.648209888  | 3.58E-17 | 4.65E-16 | no |
| MXRA8    | 0.311273139  | 8.647447644  | 3.60E-17 | 4.68E-16 | no |
| STEAP3   | 0.31121183   | 8.645561765  | 3.66E-17 | 4.75E-16 | no |
| ABCC1    | 0.311126493  | 8.64293696   | 3.74E-17 | 4.84E-16 | no |
| KIAA1543 | -0.311093839 | -8.641932621 | 3.77E-17 | 4.88E-16 | no |
| TMEM87B  | 0.311030118  | 8.639972921  | 3.82E-17 | 4.95E-16 | no |
| ICMT     | 0.310851677  | 8.63448571   | 3.99E-17 | 5.17E-16 | no |
| IFNAR2   | 0.310631953  | 8.627730402  | 4.21E-17 | 5.45E-16 | no |
| SERP2    | -0.310420542 | -8.62123211  | 4.43E-17 | 5.73E-16 | no |
| HIVEP3   | 0.310370288  | 8.61968762   | 4.49E-17 | 5.80E-16 | no |
| SLAIN2   | 0.310316109  | 8.61802261   | 4.55E-17 | 5.87E-16 | no |
| SLC46A2  | 0.310315474  | 8.61800308   | 4.55E-17 | 5.87E-16 | no |
| ARHGAP33 | -0.310199051 | -8.614425511 | 4.68E-17 | 6.03E-16 | no |
| PRAM1    | 0.310074862  | 8.610609771  | 4.82E-17 | 6.21E-16 | no |
| PTPRS    | -0.310065866 | -8.610333375 | 4.83E-17 | 6.22E-16 | no |
| RCN3     | 0.30996784   | 8.607321849  | 4.95E-17 | 6.36E-16 | no |
| FAM65C   | 0.309956793  | 8.606982506  | 4.96E-17 | 6.38E-16 | no |
| SSR3     | 0.309905437  | 8.605404897  | 5.02E-17 | 6.45E-16 | no |
| VCL      | 0.309875217  | 8.604476625  | 5.06E-17 | 6.50E-16 | no |
| RASL10B  | -0.30987341  | -8.60442111  | 5.06E-17 | 6.50E-16 | no |
| LRRC4    | -0.309548009 | -8.594427429 | 5.48E-17 | 7.02E-16 | no |
| CLIC4    | 0.309472625  | 8.592112713  | 5.58E-17 | 7.15E-16 | no |
| ZNF74    | -0.309432366 | -8.590876617 | 5.63E-17 | 7.21E-16 | no |
| C16orf45 | -0.309422889 | -8.590585654 | 5.65E-17 | 7.22E-16 | no |



|           |              |              |          |             |
|-----------|--------------|--------------|----------|-------------|
| TTC26     | 0.309418917  | 8.590463698  | 5.65E-17 | 7.23E-16 no |
| HSDL1     | -0.30938489  | -8.589419003 | 5.70E-17 | 7.28E-16 no |
| TMEM176A  | 0.309261067  | 8.585617675  | 5.87E-17 | 7.49E-16 no |
| GTSF1L    | 0.309260692  | 8.585606163  | 5.87E-17 | 7.49E-16 no |
| IGFBP6    | 0.309215377  | 8.584215107  | 5.94E-17 | 7.57E-16 no |
| LAMA4     | 0.309189629  | 8.583424767  | 5.97E-17 | 7.61E-16 no |
| ACP2      | 0.309176304  | 8.583015733  | 5.99E-17 | 7.63E-16 no |
| CD59      | 0.309096049  | 8.58055242   | 6.11E-17 | 7.78E-16 no |
| C13orf18  | 0.308942722  | 8.575846804  | 6.34E-17 | 8.07E-16 no |
| QTRTD1    | 0.308917475  | 8.575072031  | 6.38E-17 | 8.11E-16 no |
| SOCS3     | 0.308802132  | 8.571532726  | 6.56E-17 | 8.33E-16 no |
| CD276     | 0.30863761   | 8.566485081  | 6.82E-17 | 8.67E-16 no |
| SLC25A23  | -0.308499685 | -8.562254099 | 7.05E-17 | 8.95E-16 no |
| GATA3     | 0.308490827  | 8.561982394  | 7.07E-17 | 8.97E-16 no |
| MRC2      | 0.308477178  | 8.561563723  | 7.09E-17 | 8.99E-16 no |
| RAB11FIP3 | -0.308375268 | -8.558437984 | 7.27E-17 | 9.21E-16 no |
| TSC2      | -0.308244381 | -8.554423961 | 7.50E-17 | 9.50E-16 no |
| PABPC4    | 0.308152891  | 8.5516185    | 7.67E-17 | 9.70E-16 no |
| RALGAPA1  | -0.307765037 | -8.539728101 | 8.42E-17 | 1.06E-15 no |
| TXLNA     | 0.307739689  | 8.538951173  | 8.47E-17 | 1.07E-15 no |
| ANKRD16   | -0.307652304 | -8.53627294  | 8.65E-17 | 1.09E-15 no |
| NAP1L3    | -0.307561875 | -8.533501677 | 8.84E-17 | 1.12E-15 no |
| SPTY2D1   | 0.307446551  | 8.529967865  | 9.09E-17 | 1.15E-15 no |
| RGS10     | 0.307410508  | 8.528863496  | 9.16E-17 | 1.16E-15 no |
| SEMA4G    | -0.307320303 | -8.526099759 | 9.36E-17 | 1.18E-15 no |
| TTC3      | -0.307243837 | -8.523757171 | 9.54E-17 | 1.20E-15 no |
| ITPRIP    | 0.307233012  | 8.523425549  | 9.56E-17 | 1.20E-15 no |
| PHTF1     | 0.307111744  | 8.519710846  | 9.84E-17 | 1.24E-15 no |
| GALNT12   | 0.306986125  | 8.515863317  | 1.01E-16 | 1.27E-15 no |
| TRAP1     | -0.306921668 | -8.513889296 | 1.03E-16 | 1.29E-15 no |
| FLNA      | 0.30664514   | 8.505421968  | 1.10E-16 | 1.38E-15 no |
| DPAGT1    | 0.30662589   | 8.504832616  | 1.11E-16 | 1.39E-15 no |
| C1orf54   | 0.30655501   | 8.502662673  | 1.12E-16 | 1.41E-15 no |
| RAB38     | 0.306515716  | 8.501459786  | 1.14E-16 | 1.42E-15 no |
| NUDT10    | -0.306468768 | -8.50002267  | 1.15E-16 | 1.44E-15 no |
| STAT2     | 0.306357462  | 8.496615731  | 1.18E-16 | 1.48E-15 no |
| PFKM      | -0.306283436 | -8.494350126 | 1.20E-16 | 1.50E-15 no |
| SCAMP5    | -0.306277929 | -8.494181571 | 1.20E-16 | 1.50E-15 no |
| TNC       | 0.306223144  | 8.492504969  | 1.22E-16 | 1.52E-15 no |
| C22orf25  | 0.306142662  | 8.490042084  | 1.24E-16 | 1.55E-15 no |
| ACTB      | 0.305991745  | 8.485424333  | 1.29E-16 | 1.60E-15 no |
| MPZL2     | 0.305980665  | 8.485085328  | 1.29E-16 | 1.61E-15 no |
| ATP10D    | 0.305957327  | 8.484371325  | 1.30E-16 | 1.62E-15 no |
| CTNNA1    | 0.305878103  | 8.481947598  | 1.32E-16 | 1.65E-15 no |
| SAMD9     | 0.305830639  | 8.480495614  | 1.34E-16 | 1.66E-15 no |
| GRIA3     | -0.305740606 | -8.477741574 | 1.37E-16 | 1.70E-15 no |
| C14orf34  | 0.305332823  | 8.465270949  | 1.51E-16 | 1.87E-15 no |
| AFF1      | 0.305247287  | 8.462655781  | 1.54E-16 | 1.91E-15 no |
| PRPSAP2   | -0.305225303 | -8.46198369  | 1.54E-16 | 1.92E-15 no |
| KCNJ2     | 0.305216678  | 8.461720006  | 1.55E-16 | 1.92E-15 no |
| SLC31A1   | 0.305080682  | 8.457562668  | 1.60E-16 | 1.98E-15 no |

|          |              |              |          |             |
|----------|--------------|--------------|----------|-------------|
| SIL1     | 0.305029639  | 8.456002445  | 1.62E-16 | 2.00E-15 no |
| GKAP1    | -0.304843505 | -8.450313661 | 1.69E-16 | 2.09E-15 no |
| RTN3     | -0.304718918 | -8.446506485 | 1.74E-16 | 2.15E-15 no |
| EHD2     | 0.304659832  | 8.444701116  | 1.77E-16 | 2.18E-15 no |
| POSTN    | 0.304649886  | 8.444397212  | 1.77E-16 | 2.19E-15 no |
| C4orf38  | 0.304592907  | 8.442656308  | 1.79E-16 | 2.22E-15 no |
| UGCG     | 0.304592208  | 8.442634961  | 1.79E-16 | 2.22E-15 no |
| PDIA5    | 0.304567506  | 8.441880269  | 1.81E-16 | 2.23E-15 no |
| NRXN2    | -0.304491072 | -8.439545161 | 1.84E-16 | 2.27E-15 no |
| CLP1     | 0.304488302  | 8.439460541  | 1.84E-16 | 2.27E-15 no |
| LYL1     | 0.304421878  | 8.437431415  | 1.87E-16 | 2.30E-15 no |
| TMEM8B   | -0.304401412 | -8.436806258 | 1.88E-16 | 2.31E-15 no |
| CCDC109B | 0.304367389  | 8.435766989  | 1.89E-16 | 2.33E-15 no |
| SLC25A19 | 0.304351576  | 8.435283979  | 1.90E-16 | 2.34E-15 no |
| APC2     | -0.3040625   | -8.426455453 | 2.03E-16 | 2.50E-15 no |
| ZNF80    | 0.303988721  | 8.424202614  | 2.07E-16 | 2.54E-15 no |
| PSMB8    | 0.303967689  | 8.423560404  | 2.08E-16 | 2.55E-15 no |
| TMEM49   | 0.303961957  | 8.423385407  | 2.08E-16 | 2.55E-15 no |
| ZC3H12A  | 0.303913362  | 8.421901697  | 2.11E-16 | 2.58E-15 no |
| RAP2C    | 0.303884373  | 8.421016612  | 2.12E-16 | 2.60E-15 no |
| PLA2G6   | -0.303825608 | -8.419222544 | 2.15E-16 | 2.63E-15 no |
| OSTC     | 0.303521613  | 8.409943354  | 2.31E-16 | 2.83E-15 no |
| M6PR     | 0.303476911  | 8.408579096  | 2.34E-16 | 2.86E-15 no |
| TAGLN2   | 0.303280538  | 8.402586738  | 2.45E-16 | 2.99E-15 no |
| CBS      | -0.303167334 | -8.399132848 | 2.51E-16 | 3.07E-15 no |
| DEAF1    | -0.303145137 | -8.398455648 | 2.53E-16 | 3.08E-15 no |
| ARL6IP5  | 0.302741151  | 8.386133346  | 2.78E-16 | 3.39E-15 no |
| HIATL1   | 0.302714223  | 8.38531216   | 2.80E-16 | 3.41E-15 no |
| C9orf21  | 0.302708133  | 8.385126465  | 2.80E-16 | 3.41E-15 no |
| GTPBP1   | -0.302707566 | -8.385109151 | 2.80E-16 | 3.41E-15 no |
| CLASP2   | -0.302681023 | -8.384299769 | 2.82E-16 | 3.43E-15 no |
| HSPA5    | 0.302609889  | 8.382130688  | 2.87E-16 | 3.49E-15 no |
| NMNAT1   | 0.302607403  | 8.382054869  | 2.87E-16 | 3.49E-15 no |
| CEACAM3  | 0.302560302  | 8.380618716  | 2.90E-16 | 3.52E-15 no |
| KLHL25   | -0.302513341 | -8.379186901 | 2.93E-16 | 3.56E-15 no |
| GATAD2B  | -0.302436431 | -8.376842115 | 2.99E-16 | 3.62E-15 no |
| LSM14B   | -0.302403097 | -8.375825911 | 3.01E-16 | 3.65E-15 no |
| NFE2     | 0.302375113  | 8.374972801  | 3.03E-16 | 3.67E-15 no |
| NUCB1    | 0.302187524  | 8.36925479   | 3.17E-16 | 3.83E-15 no |
| FPGT     | 0.301729212  | 8.355289187  | 3.53E-16 | 4.27E-15 no |
| PRR3     | -0.301720222 | -8.355015304 | 3.53E-16 | 4.27E-15 no |
| FNDC1    | 0.30167903   | 8.353760428  | 3.57E-16 | 4.31E-15 no |
| PSMC2    | 0.301667928  | 8.353422229  | 3.58E-16 | 4.32E-15 no |
| TIMP1    | 0.30150991   | 8.348608883  | 3.71E-16 | 4.48E-15 no |
| RCOR2    | -0.301299396 | -8.342197684 | 3.90E-16 | 4.70E-15 no |
| PLEKHA9  | 0.300984029  | 8.332595677  | 4.20E-16 | 5.06E-15 no |
| GSR      | 0.300945633  | 8.331426842  | 4.24E-16 | 5.10E-15 no |
| TERF2IP  | -0.300930274 | -8.330959288 | 4.25E-16 | 5.12E-15 no |
| GRIA2    | -0.300906121 | -8.330224063 | 4.28E-16 | 5.15E-15 no |
| VAMP5    | 0.300847929  | 8.328452763  | 4.33E-16 | 5.21E-15 no |
| RARRES3  | 0.300801522  | 8.327040221  | 4.38E-16 | 5.26E-15 no |

|           |              |              |          |             |
|-----------|--------------|--------------|----------|-------------|
| RAB42     | 0.300800828  | 8.327019102  | 4.38E-16 | 5.26E-15 no |
| RPN2      | 0.300590129  | 8.320606769  | 4.60E-16 | 5.53E-15 no |
| LOC374443 | 0.300493171  | 8.317656461  | 4.71E-16 | 5.65E-15 no |
| EBF4      | -0.300476005 | -8.317134148 | 4.73E-16 | 5.67E-15 no |
| MAP3K2    | 0.300427482  | 8.31565777   | 4.78E-16 | 5.73E-15 no |
| CSTB      | 0.300395459  | 8.314683468  | 4.82E-16 | 5.77E-15 no |
| SCAPER    | -0.300356277 | -8.313491383 | 4.86E-16 | 5.82E-15 no |
| SH3GLB1   | 0.30029365   | 8.311586121  | 4.93E-16 | 5.90E-15 no |
| C12orf53  | -0.300286798 | -8.311377677 | 4.94E-16 | 5.91E-15 no |
| FBLN5     | 0.300260466  | 8.310576627  | 4.97E-16 | 5.94E-15 no |
| VM01      | 0.300201585  | 8.30878549   | 5.04E-16 | 6.02E-15 no |
| MOBKL2A   | 0.30017675   | 8.308030046  | 5.07E-16 | 6.05E-15 no |
| CYB5R4    | 0.300171813  | 8.307879888  | 5.08E-16 | 6.05E-15 no |
| VPS52     | -0.300134317 | -8.30673935  | 5.12E-16 | 6.10E-15 no |
| MAF       | 0.300000626  | 8.302673178  | 5.28E-16 | 6.29E-15 no |
| SARM1     | -0.299905986 | -8.299795071 | 5.40E-16 | 6.43E-15 no |
| AEBP1     | 0.299897559  | 8.299538793  | 5.41E-16 | 6.44E-15 no |
| TOM1L2    | -0.299873428 | -8.298805013 | 5.44E-16 | 6.47E-15 no |
| STK4      | 0.299709923  | 8.293833403  | 5.65E-16 | 6.72E-15 no |
| FKBP9     | 0.299564529  | 8.289413186  | 5.85E-16 | 6.95E-15 no |
| FHL3      | 0.299547306  | 8.288889603  | 5.87E-16 | 6.97E-15 no |
| ZNF213    | -0.299519102 | -8.288032236 | 5.91E-16 | 7.01E-15 no |
| C9orf64   | 0.299511553  | 8.28780276   | 5.92E-16 | 7.02E-15 no |
| SOX8      | -0.299496014 | -8.287330424 | 5.94E-16 | 7.04E-15 no |
| TCEAL2    | -0.29926861  | -8.280418687 | 6.26E-16 | 7.42E-15 no |
| MAN2B2    | 0.29924826   | 8.27980024   | 6.29E-16 | 7.45E-15 no |
| RNF165    | -0.299215611 | -8.278808051 | 6.34E-16 | 7.50E-15 no |
| AP1S3     | 0.299076942  | 8.274594315  | 6.55E-16 | 7.74E-15 no |
| MSC       | 0.299014023  | 8.272682585  | 6.64E-16 | 7.85E-15 no |
| APBA2     | -0.298882678 | -8.268692163 | 6.85E-16 | 8.09E-15 no |
| FRY       | -0.298823282 | -8.266887811 | 6.95E-16 | 8.20E-15 no |
| GRIA4     | -0.298683743 | -8.262649284 | 7.17E-16 | 8.46E-15 no |
| AARS      | -0.298637076 | -8.26123189  | 7.25E-16 | 8.55E-15 no |
| BST2      | 0.298582263  | 8.259567163  | 7.34E-16 | 8.65E-15 no |
| PRF1      | 0.298567183  | 8.259109187  | 7.37E-16 | 8.68E-15 no |
| JPH4      | -0.2985352   | -8.258137899 | 7.43E-16 | 8.74E-15 no |
| HLA-L     | 0.298469495  | 8.256142575  | 7.54E-16 | 8.87E-15 no |
| ZNF519    | -0.298412626 | -8.254415685 | 7.64E-16 | 8.98E-15 no |
| ERAP2     | 0.298389033  | 8.253699305  | 7.68E-16 | 9.02E-15 no |
| CCBL1     | -0.298245874 | -8.249352657 | 7.94E-16 | 9.32E-15 no |
| BTN2A3    | 0.29802221   | 8.242562931  | 8.36E-16 | 9.81E-15 no |
| ZDHHC22   | -0.297988193 | -8.241530438 | 8.43E-16 | 9.88E-15 no |
| LOC400027 | -0.297952341 | -8.240442254 | 8.50E-16 | 9.96E-15 no |
| LING01    | -0.297938889 | -8.240033977 | 8.52E-16 | 9.98E-15 no |
| DNM3      | -0.297884601 | -8.238386323 | 8.63E-16 | 1.01E-14 no |
| PTCHD2    | -0.297810323 | -8.236132113 | 8.78E-16 | 1.03E-14 no |
| UBE20     | -0.297759742 | -8.234597149 | 8.88E-16 | 1.04E-14 no |
| ALDOC     | -0.297729276 | -8.233672664 | 8.95E-16 | 1.05E-14 no |
| OLIG1     | -0.297676954 | -8.232084997 | 9.06E-16 | 1.06E-14 no |
| TGFBI     | 0.297651498  | 8.231312608  | 9.11E-16 | 1.06E-14 no |
| ZRANB1    | -0.297579195 | -8.229118816 | 9.26E-16 | 1.08E-14 no |

|              |              |              |          |             |
|--------------|--------------|--------------|----------|-------------|
| C11orf24     | 0.297495417  | 8.226577072  | 9.44E-16 | 1.10E-14 no |
| CCDC125      | 0.297399849  | 8.223677898  | 9.65E-16 | 1.12E-14 no |
| PMM2         | 0.297296083  | 8.22053032   | 9.89E-16 | 1.15E-14 no |
| CECR6        | -0.297262894 | -8.21952367  | 9.96E-16 | 1.16E-14 no |
| CD46         | 0.297132195  | 8.215559702  | 1.03E-15 | 1.19E-14 no |
| ZNFX1        | 0.297123754  | 8.215303689  | 1.03E-15 | 1.20E-14 no |
| HDGFRP3      | -0.297081453 | -8.214020879 | 1.04E-15 | 1.21E-14 no |
| TAB1         | -0.297016096 | -8.212038965 | 1.05E-15 | 1.22E-14 no |
| TMEM70       | 0.296995952  | 8.211428116  | 1.06E-15 | 1.23E-14 no |
| NECAP2       | 0.296892837  | 8.20830153   | 1.09E-15 | 1.26E-14 no |
| TRH          | 0.296858481  | 8.207259883  | 1.09E-15 | 1.27E-14 no |
| LOC100130872 | 0.296813468  | 8.205895158  | 1.11E-15 | 1.28E-14 no |
| LIPA         | 0.296775562  | 8.204745979  | 1.11E-15 | 1.29E-14 no |
| C7orf58      | 0.296745381  | 8.20383099   | 1.12E-15 | 1.30E-14 no |
| CCL23        | 0.296740581  | 8.203685484  | 1.12E-15 | 1.30E-14 no |
| SEC31A       | 0.296699214  | 8.202431451  | 1.13E-15 | 1.31E-14 no |
| IFI44        | 0.296675113  | 8.201700852  | 1.14E-15 | 1.32E-14 no |
| COQ2         | 0.296674281  | 8.201675643  | 1.14E-15 | 1.32E-14 no |
| RAB20        | 0.296497341  | 8.196312447  | 1.19E-15 | 1.37E-14 no |
| KLC4         | -0.296448081 | -8.194819502 | 1.20E-15 | 1.39E-14 no |
| TRPC2        | 0.296389527  | 8.193044976  | 1.22E-15 | 1.40E-14 no |
| CALU         | 0.296300179  | 8.190337387  | 1.24E-15 | 1.43E-14 no |
| PNRC1        | 0.296271527  | 8.189469175  | 1.25E-15 | 1.44E-14 no |
| NADK         | 0.296229121  | 8.188184226  | 1.26E-15 | 1.45E-14 no |
| HAAO         | 0.296225261  | 8.188067284  | 1.27E-15 | 1.45E-14 no |
| METRNL       | 0.296225137  | 8.188063528  | 1.27E-15 | 1.45E-14 no |
| PHACTR3      | -0.296223067 | -8.188000804 | 1.27E-15 | 1.45E-14 no |
| GPR173       | -0.296205066 | -8.187455381 | 1.27E-15 | 1.46E-14 no |
| PDZD4        | -0.296193517 | -8.187105438 | 1.27E-15 | 1.46E-14 no |
| IMPA2        | 0.296075342  | 8.183525043  | 1.31E-15 | 1.50E-14 no |
| SLC22A18     | 0.296063153  | 8.183155755  | 1.31E-15 | 1.50E-14 no |
| EIF4ENIF1    | -0.29582469  | -8.175932264 | 1.39E-15 | 1.59E-14 no |
| SF3B2        | -0.295807979 | -8.175426118 | 1.39E-15 | 1.59E-14 no |
| FZD6         | 0.295773182  | 8.174372221  | 1.40E-15 | 1.61E-14 no |
| GPBP1L1      | 0.295670133  | 8.171251333  | 1.44E-15 | 1.64E-14 no |
| SPON2        | 0.295595472  | 8.168990395  | 1.46E-15 | 1.67E-14 no |
| SMPD3        | -0.295553009 | -8.167704583 | 1.48E-15 | 1.69E-14 no |
| CLIP3        | -0.295446814 | -8.164489139 | 1.51E-15 | 1.73E-14 no |
| SLC35D2      | 0.295443111  | 8.164376999  | 1.51E-15 | 1.73E-14 no |
| LOC257358    | 0.295408291  | 8.163322764  | 1.53E-15 | 1.74E-14 no |
| GIT1         | -0.295316409 | -8.160541077 | 1.56E-15 | 1.78E-14 no |
| COL6A3       | 0.295275868  | 8.159313772  | 1.57E-15 | 1.79E-14 no |
| ZDHHC18      | 0.295088108  | 8.153630381  | 1.64E-15 | 1.87E-14 no |
| SPIRE2       | -0.294983793 | -8.150473289 | 1.68E-15 | 1.91E-14 no |
| GNG4         | -0.294949019 | -8.149420911 | 1.69E-15 | 1.93E-14 no |
| SPP1         | 0.2948176    | 8.145444073  | 1.75E-15 | 1.98E-14 no |
| ARSD         | 0.294810766  | 8.145237287  | 1.75E-15 | 1.99E-14 no |
| HORMAD1      | 0.294760641  | 8.143720616  | 1.77E-15 | 2.01E-14 no |
| SLC25A27     | -0.294652001 | -8.140433665 | 1.81E-15 | 2.06E-14 no |
| PHYHIPL      | -0.294585966 | -8.13843591  | 1.84E-15 | 2.09E-14 no |
| TWIST1       | 0.294572294  | 8.138022291  | 1.85E-15 | 2.09E-14 no |

|           |              |              |          |             |
|-----------|--------------|--------------|----------|-------------|
| PLCB1     | -0.294305323 | -8.129947029 | 1.96E-15 | 2.22E-14 no |
| FAM120AOS | 0.294289528  | 8.129469349  | 1.97E-15 | 2.23E-14 no |
| SEC61A1   | 0.294240008  | 8.127971726  | 1.99E-15 | 2.25E-14 no |
| ANKRD46   | -0.294213658 | -8.127174886 | 2.00E-15 | 2.27E-14 no |
| TMEM64    | 0.294087512  | 8.123360308  | 2.06E-15 | 2.33E-14 no |
| BRD9      | -0.293981653 | -8.120159563 | 2.11E-15 | 2.39E-14 no |
| ABAT      | -0.293904473 | -8.117826171 | 2.15E-15 | 2.43E-14 no |
| CYBRD1    | 0.293890879  | 8.117415192  | 2.16E-15 | 2.43E-14 no |
| C20orf11  | -0.293842212 | -8.115943962 | 2.18E-15 | 2.46E-14 no |
| ZNF436    | 0.293829252  | 8.115552163  | 2.19E-15 | 2.46E-14 no |
| UBE2F     | 0.293826581  | 8.115471421  | 2.19E-15 | 2.47E-14 no |
| H2AFJ     | 0.293634231  | 8.10965725   | 2.29E-15 | 2.57E-14 no |
| FAM168B   | -0.29358835  | -8.108270569 | 2.31E-15 | 2.60E-14 no |
| IDO1      | 0.293488834  | 8.105263062  | 2.36E-15 | 2.66E-14 no |
| NXF3      | 0.293338046  | 8.100706603  | 2.45E-15 | 2.75E-14 no |
| PLXNB2    | 0.293326637  | 8.100361854  | 2.45E-15 | 2.75E-14 no |
| MYO1B     | 0.293295771  | 8.099429254  | 2.47E-15 | 2.77E-14 no |
| FASN      | -0.293262658 | -8.098428779 | 2.49E-15 | 2.79E-14 no |
| RELL1     | 0.293257241  | 8.098265106  | 2.49E-15 | 2.79E-14 no |
| ARNT2     | -0.293183341 | -8.096032448 | 2.53E-15 | 2.84E-14 no |
| ZNF248    | -0.293146292 | -8.094913154 | 2.55E-15 | 2.86E-14 no |
| LRRC16B   | -0.293000219 | -8.090500625 | 2.64E-15 | 2.96E-14 no |
| LMAN1     | 0.29291948   | 8.08806194   | 2.69E-15 | 3.01E-14 no |
| ANG       | 0.29280794   | 8.084693226  | 2.76E-15 | 3.08E-14 no |
| B3GNT5    | 0.292792144  | 8.084216189  | 2.77E-15 | 3.09E-14 no |
| SBK1      | -0.29264579  | -8.079796644 | 2.86E-15 | 3.20E-14 no |
| PSME2     | 0.292541854  | 8.0766584    | 2.93E-15 | 3.27E-14 no |
| SHF       | -0.292451128 | -8.073919295 | 2.99E-15 | 3.34E-14 no |
| ARL4C     | 0.292445205  | 8.073740466  | 2.99E-15 | 3.34E-14 no |
| TUBAL3    | 0.292423226  | 8.073076929  | 3.01E-15 | 3.35E-14 no |
| C4orf34   | 0.292390622  | 8.07209267   | 3.03E-15 | 3.38E-14 no |
| RB1       | 0.292302936  | 8.069445726  | 3.09E-15 | 3.44E-14 no |
| GABBR1    | -0.292201134 | -8.066372916 | 3.16E-15 | 3.52E-14 no |
| TANK      | 0.292082749  | 8.062799942  | 3.25E-15 | 3.61E-14 no |
| HNRPDL    | -0.292047961 | -8.061750093 | 3.28E-15 | 3.64E-14 no |
| CDC42EP5  | 0.2919662    | 8.05928279   | 3.34E-15 | 3.71E-14 no |
| MOCOS     | 0.291938866  | 8.058457982  | 3.36E-15 | 3.73E-14 no |
| C6orf168  | -0.291868683 | -8.056340272 | 3.41E-15 | 3.78E-14 no |
| MICAL3    | -0.291618109 | -8.048780618 | 3.61E-15 | 4.00E-14 no |
| CD109     | 0.291612124  | 8.04860008   | 3.61E-15 | 4.01E-14 no |
| PDIA4     | 0.291590722  | 8.04795449   | 3.63E-15 | 4.02E-14 no |
| SLC35F5   | 0.291568019  | 8.047269648  | 3.65E-15 | 4.04E-14 no |
| GLUD1     | -0.291507729 | -8.045451115 | 3.70E-15 | 4.09E-14 no |
| COL15A1   | 0.291428812  | 8.043070857  | 3.77E-15 | 4.16E-14 no |
| ARL3      | -0.291427277 | -8.043024558 | 3.77E-15 | 4.16E-14 no |
| ADAMTS2   | 0.291366278  | 8.041184862  | 3.82E-15 | 4.22E-14 no |
| RUNDC3A   | -0.291338914 | -8.040359639 | 3.84E-15 | 4.24E-14 no |
| HIRA      | -0.291181706 | -8.035618938 | 3.98E-15 | 4.39E-14 no |
| LOC339674 | -0.291150668 | -8.034683058 | 4.01E-15 | 4.42E-14 no |
| SIGLEC16  | 0.291093701  | 8.032965447  | 4.06E-15 | 4.48E-14 no |
| ARFGAP2   | -0.29106976  | -8.032243595 | 4.08E-15 | 4.50E-14 no |

|          |              |              |          |             |
|----------|--------------|--------------|----------|-------------|
| C12orf70 | 0.291023516  | 8.030849377  | 4.13E-15 | 4.54E-14 no |
| CCDC46   | 0.290917856  | 8.027664045  | 4.23E-15 | 4.65E-14 no |
| TLR10    | 0.290884899  | 8.02667056   | 4.26E-15 | 4.68E-14 no |
| DSCAM    | -0.290859649 | -8.025909404 | 4.28E-15 | 4.71E-14 no |
| MRC1     | 0.290822438  | 8.024787742  | 4.32E-15 | 4.74E-14 no |
| CEPT1    | 0.290759086  | 8.022878189  | 4.38E-15 | 4.81E-14 no |
| MALL     | 0.290677438  | 8.020417333  | 4.46E-15 | 4.89E-14 no |
| PURG     | -0.290631902 | -8.019044951 | 4.51E-15 | 4.94E-14 no |
| ASAH1    | 0.290519168  | 8.015647651  | 4.62E-15 | 5.07E-14 no |
| TNFRSF17 | 0.29044565   | 8.013432316  | 4.70E-15 | 5.15E-14 no |
| ZNF25    | -0.290400854 | -8.012082563 | 4.75E-15 | 5.20E-14 no |
| IFIH1    | 0.290306322  | 8.009234373  | 4.85E-15 | 5.31E-14 no |
| MAP7D3   | 0.290280799  | 8.00846542   | 4.87E-15 | 5.33E-14 no |
| ZKSCAN2  | -0.290245491 | -8.007401705 | 4.91E-15 | 5.37E-14 no |
| FAM110B  | -0.290174386 | -8.005259651 | 4.99E-15 | 5.46E-14 no |
| CTHRC1   | 0.290144519  | 8.004359914  | 5.03E-15 | 5.49E-14 no |
| NRXN1    | -0.2901358   | -8.004097291 | 5.04E-15 | 5.50E-14 no |
| OMG      | -0.289937977 | -7.998138798 | 5.26E-15 | 5.74E-14 no |
| DHX30    | -0.289891361 | -7.996734855 | 5.32E-15 | 5.80E-14 no |
| ENTPD1   | 0.289888542  | 7.996649979  | 5.32E-15 | 5.80E-14 no |
| LEPREL1  | 0.289866381  | 7.995982586  | 5.35E-15 | 5.83E-14 no |
| IL32     | 0.289783157  | 7.993476352  | 5.45E-15 | 5.93E-14 no |
| SMOC2    | 0.289776466  | 7.993274874  | 5.46E-15 | 5.94E-14 no |
| DHRS7    | 0.289765107  | 7.992932817  | 5.47E-15 | 5.95E-14 no |
| ODF2L    | 0.289697704  | 7.990903207  | 5.56E-15 | 6.04E-14 no |
| CCDC85C  | -0.2896544   | -7.989599329 | 5.61E-15 | 6.09E-14 no |
| SPTBN2   | -0.289592759 | -7.987743391 | 5.69E-15 | 6.18E-14 no |
| EFEMP2   | 0.289543466  | 7.986259343  | 5.75E-15 | 6.24E-14 no |
| TMEM198  | -0.289483914 | -7.984466509 | 5.83E-15 | 6.32E-14 no |
| AIDA     | 0.289315766  | 7.979404903  | 6.05E-15 | 6.56E-14 no |
| ATP6VOE1 | 0.289016236  | 7.970390408  | 6.47E-15 | 7.01E-14 no |
| PLOD3    | 0.288999906  | 7.96989903   | 6.49E-15 | 7.03E-14 no |
| OAS2     | 0.288948752  | 7.968359789  | 6.57E-15 | 7.11E-14 no |
| ZNF816A  | 0.2888514    | 7.965430684  | 6.71E-15 | 7.26E-14 no |
| SPATA1   | 0.288780312  | 7.963291964  | 6.82E-15 | 7.37E-14 no |
| KLHL23   | -0.288628112 | -7.958713421 | 7.05E-15 | 7.62E-14 no |
| SHISA5   | 0.288623513  | 7.958575107  | 7.06E-15 | 7.63E-14 no |
| SLC29A3  | 0.288538922  | 7.956030695  | 7.20E-15 | 7.77E-14 no |
| C4BPB    | 0.28848763   | 7.954487988  | 7.28E-15 | 7.85E-14 no |
| LGALS2   | 0.288458663  | 7.953616792  | 7.32E-15 | 7.90E-14 no |
| GALNT7   | 0.288428275  | 7.952702874  | 7.37E-15 | 7.95E-14 no |
| MGST1    | 0.288205893  | 7.946015542  | 7.75E-15 | 8.35E-14 no |
| SLC30A5  | 0.288167079  | 7.944848525  | 7.82E-15 | 8.41E-14 no |
| CKAP4    | 0.288151108  | 7.944368327  | 7.84E-15 | 8.44E-14 no |
| HNRNPH3  | -0.28810289  | -7.942918586 | 7.93E-15 | 8.52E-14 no |
| CNN2     | 0.288101806  | 7.942886017  | 7.93E-15 | 8.52E-14 no |
| CXCR2P1  | 0.288070686  | 7.941950397  | 7.99E-15 | 8.58E-14 no |
| ANPEP    | 0.288029459  | 7.940710947  | 8.06E-15 | 8.65E-14 no |
| PORCN    | -0.287989282 | -7.939503112 | 8.13E-15 | 8.73E-14 no |
| HAPLN3   | 0.287938993  | 7.937991365  | 8.22E-15 | 8.82E-14 no |
| APOC2    | 0.287917251  | 7.937337808  | 8.26E-15 | 8.86E-14 no |

|              |              |              |          |             |
|--------------|--------------|--------------|----------|-------------|
| CAV1         | 0.287888351  | 7.936469065  | 8.32E-15 | 8.91E-14 no |
| TMED9        | 0.28779027   | 7.933520975  | 8.50E-15 | 9.10E-14 no |
| MESDC1       | 0.287740162  | 7.932014956  | 8.59E-15 | 9.20E-14 no |
| HNRNPUL2     | -0.287731942 | -7.931767911 | 8.61E-15 | 9.21E-14 no |
| MRFAP1       | -0.287674621 | -7.93004518  | 8.72E-15 | 9.32E-14 no |
| ABCC3        | 0.287621767  | 7.928456784  | 8.82E-15 | 9.43E-14 no |
| ATF7IP2      | 0.287504633  | 7.924936922  | 9.05E-15 | 9.67E-14 no |
| ANGPT1       | 0.287457905  | 7.923532845  | 9.15E-15 | 9.77E-14 no |
| SURF4        | 0.287420698  | 7.922414916  | 9.22E-15 | 9.84E-14 no |
| GALNT5       | 0.287412194  | 7.922159417  | 9.24E-15 | 9.86E-14 no |
| ISLR         | 0.287349604  | 7.920278901  | 9.37E-15 | 9.99E-14 no |
| FRS3         | -0.287346245 | -7.920177991 | 9.38E-15 | 9.99E-14 no |
| ITPR3        | 0.287322313  | 7.91945899   | 9.43E-15 | 1.00E-13 no |
| KCNMB1       | 0.287319843  | 7.91938477   | 9.43E-15 | 1.00E-13 no |
| ILDR1        | 0.287319547  | 7.91937588   | 9.43E-15 | 1.00E-13 no |
| MYEF2        | -0.287282148 | -7.918252318 | 9.51E-15 | 1.01E-13 no |
| PLEKHA4      | 0.287250564  | 7.917303472  | 9.58E-15 | 1.02E-13 no |
| PLK1S1       | -0.287247272 | -7.917204579 | 9.59E-15 | 1.02E-13 no |
| STEAP1       | 0.287224894  | 7.916532351  | 9.63E-15 | 1.02E-13 no |
| GDAP1        | -0.287162621 | -7.91466168  | 9.77E-15 | 1.04E-13 no |
| TTC19        | -0.287135534 | -7.913848043 | 9.83E-15 | 1.04E-13 no |
| IBSP         | 0.287128116  | 7.913625229  | 9.84E-15 | 1.04E-13 no |
| PTGS1        | 0.287058793  | 7.911542991  | 1.00E-14 | 1.06E-13 no |
| CDK5R1       | -0.286981853 | -7.90923211  | 1.02E-14 | 1.08E-13 no |
| PCDH12       | 0.286958987  | 7.908545373  | 1.02E-14 | 1.08E-13 no |
| GXYLT2       | 0.286875108  | 7.906026342  | 1.04E-14 | 1.10E-13 no |
| GYPE         | 0.286781311  | 7.903209686  | 1.06E-14 | 1.12E-13 no |
| LOC100132707 | 0.286723298  | 7.901467744  | 1.08E-14 | 1.14E-13 no |
| SGSM2        | -0.286697438 | -7.900691273 | 1.08E-14 | 1.14E-13 no |
| LOC254559    | -0.286694558 | -7.900604772 | 1.08E-14 | 1.14E-13 no |
| IL1R2        | 0.286687812  | 7.900402225  | 1.09E-14 | 1.14E-13 no |
| GPR123       | -0.286653862 | -7.899382885 | 1.09E-14 | 1.15E-13 no |
| FAM111A      | 0.286640471  | 7.898980828  | 1.10E-14 | 1.16E-13 no |
| GMPPA        | 0.286543862  | 7.896080373  | 1.12E-14 | 1.18E-13 no |
| LEF1         | 0.286530929  | 7.89569212   | 1.12E-14 | 1.18E-13 no |
| OLFML2A      | 0.2864915    | 7.894508449  | 1.13E-14 | 1.19E-13 no |
| ZMYND11      | -0.28648874  | -7.894425593 | 1.13E-14 | 1.19E-13 no |
| NDRG2        | -0.286431862 | -7.892718174 | 1.15E-14 | 1.21E-13 no |
| SSC5D        | 0.286427124  | 7.892575975  | 1.15E-14 | 1.21E-13 no |
| UPP1         | 0.2863932    | 7.891557638  | 1.16E-14 | 1.22E-13 no |
| LILRA2       | 0.286329422  | 7.889643272  | 1.17E-14 | 1.23E-13 no |
| USP20        | -0.286328755 | -7.889623271 | 1.17E-14 | 1.23E-13 no |
| FCH02        | 0.286236795  | 7.886863194  | 1.20E-14 | 1.26E-13 no |
| SUZ12P       | -0.286220223 | -7.886365807 | 1.20E-14 | 1.26E-13 no |
| MAPK8IP3     | -0.286209612 | -7.886047363 | 1.21E-14 | 1.26E-13 no |
| ZNF84        | -0.286184644 | -7.885298021 | 1.21E-14 | 1.27E-13 no |
| WASF3        | -0.286183493 | -7.885263495 | 1.21E-14 | 1.27E-13 no |
| FAM198B      | 0.286060814  | 7.88158197   | 1.25E-14 | 1.30E-13 no |
| RNASEN       | -0.2860478   | -7.881191439 | 1.25E-14 | 1.31E-13 no |
| MTA1         | -0.286041005 | -7.880987565 | 1.25E-14 | 1.31E-13 no |
| CD58         | 0.286039627  | 7.880946216  | 1.25E-14 | 1.31E-13 no |

|           |              |              |          |             |
|-----------|--------------|--------------|----------|-------------|
| RGS3      | 0.285963277  | 7.878655247  | 1.27E-14 | 1.33E-13 no |
| RIPPLY2   | -0.285957168 | -7.878471943 | 1.27E-14 | 1.33E-13 no |
| APOL2     | 0.285880101  | 7.876159651  | 1.30E-14 | 1.35E-13 no |
| AGA       | 0.285842899  | 7.875043526  | 1.31E-14 | 1.36E-13 no |
| TRIB1     | 0.285577616  | 7.867085606  | 1.39E-14 | 1.44E-13 no |
| S100A10   | 0.285543925  | 7.866075071  | 1.40E-14 | 1.45E-13 no |
| NLRC3     | 0.285519127  | 7.865331308  | 1.40E-14 | 1.46E-13 no |
| GBP6      | 0.285514188  | 7.865183179  | 1.41E-14 | 1.46E-13 no |
| BZRAP1    | -0.285433734 | -7.862770258 | 1.43E-14 | 1.49E-13 no |
| CTNNB1    | 0.285277172  | 7.858075301  | 1.48E-14 | 1.54E-13 no |
| CEP68     | -0.285254128 | -7.857384312 | 1.49E-14 | 1.54E-13 no |
| RNASE1    | 0.285207061  | 7.855973031  | 1.50E-14 | 1.56E-13 no |
| ZNF185    | 0.285177291  | 7.855080439  | 1.51E-14 | 1.57E-13 no |
| G6PD      | 0.285119951  | 7.853361265  | 1.53E-14 | 1.59E-13 no |
| C20orf141 | 0.28509097   | 7.852492369  | 1.54E-14 | 1.60E-13 no |
| GCSH      | -0.28507795  | -7.852102035 | 1.55E-14 | 1.60E-13 no |
| LAMA2     | 0.28491201   | 7.84712751   | 1.60E-14 | 1.66E-13 no |
| EVI5L     | -0.284779137 | -7.8431448   | 1.65E-14 | 1.71E-13 no |
| BCAS4     | 0.284771561  | 7.842917742  | 1.65E-14 | 1.71E-13 no |
| COL6A2    | 0.284745653  | 7.842141244  | 1.66E-14 | 1.72E-13 no |
| SKAP2     | 0.284742569  | 7.842048819  | 1.67E-14 | 1.72E-13 no |
| C22orf26  | 0.28473306   | 7.841763823  | 1.67E-14 | 1.72E-13 no |
| ANKRD5    | 0.284687239  | 7.840390583  | 1.69E-14 | 1.74E-13 no |
| EVC2      | 0.284624152  | 7.838499971  | 1.71E-14 | 1.76E-13 no |
| CEBPD     | 0.284614261  | 7.838203538  | 1.71E-14 | 1.77E-13 no |
| SEPN1     | 0.284608492  | 7.838030675  | 1.71E-14 | 1.77E-13 no |
| HS2ST1    | 0.284571294  | 7.836915988  | 1.73E-14 | 1.78E-13 no |
| PEA15     | -0.284560561 | -7.836594338 | 1.73E-14 | 1.78E-13 no |
| CSDAP1    | 0.284544368  | 7.836109109  | 1.74E-14 | 1.79E-13 no |
| STT3A     | 0.284455834  | 7.833456267  | 1.77E-14 | 1.82E-13 no |
| ARHGEF7   | -0.284431798 | -7.832736087 | 1.78E-14 | 1.83E-13 no |
| TRPM4     | 0.284330718  | 7.829707655  | 1.82E-14 | 1.87E-13 no |
| CHST2     | 0.284298286  | 7.828736036  | 1.84E-14 | 1.88E-13 no |
| COL8A2    | 0.284293369  | 7.828588721  | 1.84E-14 | 1.88E-13 no |
| MLX       | 0.284279562  | 7.828175088  | 1.84E-14 | 1.89E-13 no |
| FUT9      | -0.284197863 | -7.825727668 | 1.88E-14 | 1.92E-13 no |
| COPB1     | 0.284132372  | 7.823765897  | 1.90E-14 | 1.95E-13 no |
| TMEM185B  | 0.284104123  | 7.822919744  | 1.92E-14 | 1.96E-13 no |
| GDPD1     | -0.284095986 | -7.822675999 | 1.92E-14 | 1.96E-13 no |
| EML4      | 0.284084412  | 7.822329346  | 1.92E-14 | 1.97E-13 no |
| SREBF2    | -0.283967239 | -7.818819898 | 1.97E-14 | 2.02E-13 no |
| RILP      | 0.283861375  | 7.815649516  | 2.02E-14 | 2.06E-13 no |
| TIGD3     | -0.283816914 | -7.814318104 | 2.04E-14 | 2.08E-13 no |
| LRRN4CL   | 0.283736437  | 7.811908282  | 2.08E-14 | 2.12E-13 no |
| HNRNPF    | 0.283666761  | 7.809822071  | 2.11E-14 | 2.15E-13 no |
| CRTAM     | 0.283650311  | 7.809329552  | 2.12E-14 | 2.16E-13 no |
| CRIP1     | 0.283571506  | 7.80697017   | 2.15E-14 | 2.19E-13 no |
| ANO1      | 0.283567222  | 7.806841921  | 2.15E-14 | 2.19E-13 no |
| GALNT4    | 0.28355855   | 7.80658228   | 2.16E-14 | 2.20E-13 no |
| DSCAML1   | -0.28355598  | -7.806505345 | 2.16E-14 | 2.20E-13 no |
| P4HA3     | 0.283495844  | 7.80470504   | 2.19E-14 | 2.22E-13 no |



|              |              |              |          |             |
|--------------|--------------|--------------|----------|-------------|
| C15orf34     | 0.283415389  | 7.802296637  | 2.23E-14 | 2.26E-13 no |
| TARSL2       | -0.283409341 | -7.802115574 | 2.23E-14 | 2.26E-13 no |
| SDR39U1      | -0.283376748 | -7.801139958 | 2.25E-14 | 2.28E-13 no |
| BLZF1        | 0.283351914  | 7.800396634  | 2.26E-14 | 2.29E-13 no |
| PRSS23       | 0.283298603  | 7.79880096   | 2.28E-14 | 2.32E-13 no |
| ASTN1        | -0.283265654 | -7.797814774 | 2.30E-14 | 2.33E-13 no |
| HCN3         | -0.283235431 | -7.796910216 | 2.32E-14 | 2.35E-13 no |
| CDH20        | -0.283203059 | -7.795941369 | 2.33E-14 | 2.36E-13 no |
| MGEA5        | -0.283179877 | -7.795247592 | 2.34E-14 | 2.37E-13 no |
| LRRC33       | 0.283161412  | 7.79469498   | 2.35E-14 | 2.38E-13 no |
| ELAVL3       | -0.283147999 | -7.794293572 | 2.36E-14 | 2.39E-13 no |
| TMED7-TICAM2 | 0.283103431  | 7.792959839  | 2.38E-14 | 2.41E-13 no |
| SSH3         | 0.283102305  | 7.792926126  | 2.38E-14 | 2.41E-13 no |
| PJA1         | -0.283099919 | -7.792854737 | 2.38E-14 | 2.41E-13 no |
| EVC          | 0.283056098  | 7.791543413  | 2.41E-14 | 2.43E-13 no |
| TRIP6        | 0.282930787  | 7.787793808  | 2.47E-14 | 2.50E-13 no |
| MED8         | 0.282902596  | 7.786950334  | 2.49E-14 | 2.51E-13 no |
| WBCSCR26     | 0.282839348  | 7.785058008  | 2.52E-14 | 2.54E-13 no |
| P4HB         | 0.282588743  | 7.777561274  | 2.67E-14 | 2.69E-13 no |
| LOXL2        | 0.282545063  | 7.776254771  | 2.69E-14 | 2.71E-13 no |
| C12orf76     | -0.282519577 | -7.775492503 | 2.71E-14 | 2.72E-13 no |
| SNX8         | 0.282500365  | 7.774917889  | 2.72E-14 | 2.73E-13 no |
| BRWD1        | -0.282433049 | -7.772904631 | 2.76E-14 | 2.77E-13 no |
| FBXL19       | -0.282429081 | -7.772785939 | 2.76E-14 | 2.77E-13 no |
| GBP3         | 0.282417884  | 7.772451087  | 2.77E-14 | 2.78E-13 no |
| IL1RN        | 0.2823889    | 7.77158429   | 2.78E-14 | 2.79E-13 no |
| FLRT1        | -0.282327981 | -7.769762527 | 2.82E-14 | 2.83E-13 no |
| STAT1        | 0.282280887  | 7.768354264  | 2.85E-14 | 2.86E-13 no |
| PIGK         | 0.282270396  | 7.768040535  | 2.86E-14 | 2.86E-13 no |
| GALNT13      | -0.282143087 | -7.764233926 | 2.94E-14 | 2.94E-13 no |
| AKR1B1       | 0.282113409  | 7.763346616  | 2.96E-14 | 2.96E-13 no |
| ORMDL2       | 0.282112298  | 7.763313397  | 2.96E-14 | 2.96E-13 no |
| CXCL11       | 0.282077617  | 7.762276494  | 2.98E-14 | 2.98E-13 no |
| GNG10        | 0.282064229  | 7.761876244  | 2.99E-14 | 2.99E-13 no |
| VEGFC        | 0.282060434  | 7.761762794  | 2.99E-14 | 2.99E-13 no |
| C19orf40     | 0.282009601  | 7.760243096  | 3.02E-14 | 3.02E-13 no |
| RARS         | 0.282006659  | 7.76015514   | 3.02E-14 | 3.02E-13 no |
| KIAA1432     | 0.281947247  | 7.758379049  | 3.06E-14 | 3.06E-13 no |
| HSP90B1      | 0.281920047  | 7.75756596   | 3.08E-14 | 3.07E-13 no |
| CP           | 0.281911404  | 7.75730761   | 3.09E-14 | 3.08E-13 no |
| CASKIN1      | -0.28173119  | -7.751921001 | 3.21E-14 | 3.20E-13 no |
| APBB1        | -0.281717463 | -7.751510737 | 3.22E-14 | 3.21E-13 no |
| TSHZ1        | -0.281576227 | -7.747289876 | 3.32E-14 | 3.31E-13 no |
| IQGAP2       | 0.281519187  | 7.745585362  | 3.36E-14 | 3.35E-13 no |
| STMN3        | -0.281464567 | -7.743953258 | 3.40E-14 | 3.38E-13 no |
| ATP6V1G2     | -0.281364928 | -7.740976172 | 3.48E-14 | 3.46E-13 no |
| DERL2        | 0.281352201  | 7.740595911  | 3.49E-14 | 3.46E-13 no |
| CBARA1       | -0.281300048 | -7.73903777  | 3.53E-14 | 3.50E-13 no |
| COPB2        | 0.28115454   | 7.734690903  | 3.64E-14 | 3.61E-13 no |
| HTATSF1      | -0.281086421 | -7.732656114 | 3.69E-14 | 3.66E-13 no |
| HMOX1        | 0.281049638  | 7.731557432  | 3.72E-14 | 3.69E-13 no |

|           |              |              |          |             |
|-----------|--------------|--------------|----------|-------------|
| EMP3      | 0.280808459  | 7.724354503  | 3.92E-14 | 3.89E-13 no |
| DHX38     | -0.280768363 | -7.723157146 | 3.95E-14 | 3.92E-13 no |
| EIF2AK4   | 0.280748541  | 7.722565233  | 3.97E-14 | 3.93E-13 no |
| UBD       | 0.280742403  | 7.722381967  | 3.98E-14 | 3.94E-13 no |
| TCF7      | 0.280651501  | 7.719667711  | 4.06E-14 | 4.01E-13 no |
| NDRG3     | -0.280611552 | -7.718474933 | 4.09E-14 | 4.04E-13 no |
| VPS33B    | -0.280550885 | -7.716663652 | 4.14E-14 | 4.10E-13 no |
| JMY       | -0.280471558 | -7.714295388 | 4.22E-14 | 4.16E-13 no |
| MCFD2     | 0.280426955  | 7.712963895  | 4.26E-14 | 4.20E-13 no |
| SLITRK5   | -0.280385241 | -7.711718669 | 4.30E-14 | 4.24E-13 no |
| SMAGP     | 0.280361578  | 7.711012319  | 4.32E-14 | 4.26E-13 no |
| RNASE4    | 0.280286109  | 7.70875963   | 4.39E-14 | 4.33E-13 no |
| CNPY4     | 0.280243118  | 7.707476459  | 4.43E-14 | 4.36E-13 no |
| ADCK2     | 0.280233665  | 7.707194311  | 4.44E-14 | 4.37E-13 no |
| CTTNBP2NL | 0.280211667  | 7.706537757  | 4.46E-14 | 4.39E-13 no |
| LMTK3     | -0.280163484 | -7.705099717 | 4.51E-14 | 4.43E-13 no |
| C2orf29   | 0.280111457  | 7.703547029  | 4.56E-14 | 4.48E-13 no |
| SH2B1     | -0.280089644 | -7.702896053 | 4.58E-14 | 4.50E-13 no |
| CD209     | 0.279939991  | 7.698430322  | 4.73E-14 | 4.64E-13 no |
| WWTR1     | 0.27992039   | 7.697845455  | 4.75E-14 | 4.66E-13 no |
| TMEM102   | 0.279862614  | 7.696121579  | 4.81E-14 | 4.72E-13 no |
| MTMR9     | -0.279700568 | -7.69128703  | 4.98E-14 | 4.88E-13 no |
| LAMB2L    | -0.279637353 | -7.689401251 | 5.05E-14 | 4.95E-13 no |
| CADM2     | -0.279596842 | -7.688192832 | 5.09E-14 | 4.99E-13 no |
| TRIP12    | 0.279468697  | 7.684370559  | 5.23E-14 | 5.12E-13 no |
| C20orf26  | 0.279404053  | 7.682442569  | 5.30E-14 | 5.19E-13 no |
| PARVB     | 0.279366467  | 7.681321602  | 5.35E-14 | 5.23E-13 no |
| BMF       | 0.279274222  | 7.6785707    | 5.45E-14 | 5.34E-13 no |
| TMEM136   | -0.279260943 | -7.678174704 | 5.47E-14 | 5.35E-13 no |
| LOC90110  | -0.279242573 | -7.677626935 | 5.49E-14 | 5.37E-13 no |
| SOX6      | -0.279227914 | -7.6771898   | 5.51E-14 | 5.38E-13 no |
| PLSCR3    | 0.279171989  | 7.675522198  | 5.58E-14 | 5.44E-13 no |
| CXCR2     | 0.279119076  | 7.673944502  | 5.64E-14 | 5.50E-13 no |
| CLEC4E    | 0.279086578  | 7.67297553   | 5.68E-14 | 5.54E-13 no |
| ASB13     | -0.279082858 | -7.67286463  | 5.68E-14 | 5.54E-13 no |
| PRRG4     | 0.279033379  | 7.671389405  | 5.74E-14 | 5.60E-13 no |
| EDNRA     | 0.278952101  | 7.668966266  | 5.84E-14 | 5.69E-13 no |
| ZCCHC9    | 0.278798753  | 7.664395     | 6.04E-14 | 5.88E-13 no |
| TTLL12    | -0.27878696  | -7.664043489 | 6.06E-14 | 5.89E-13 no |
| FRMD8     | 0.278784986  | 7.663984642  | 6.06E-14 | 5.89E-13 no |
| NOVA2     | -0.278621607 | -7.659115106 | 6.27E-14 | 6.10E-13 no |
| DDOST     | 0.27861976   | 7.659060082  | 6.28E-14 | 6.10E-13 no |
| JPH3      | -0.278579047 | -7.657846733 | 6.33E-14 | 6.15E-13 no |
| AP1B1     | 0.278490769  | 7.655216006  | 6.45E-14 | 6.26E-13 no |
| OBFC1     | 0.27842927   | 7.653383415  | 6.54E-14 | 6.34E-13 no |
| INPP5A    | -0.27834547  | -7.650886467 | 6.66E-14 | 6.45E-13 no |
| AP3B2     | -0.278302122 | -7.64959492  | 6.72E-14 | 6.51E-13 no |
| TMED5     | 0.278292493  | 7.64930804   | 6.73E-14 | 6.52E-13 no |
| HSPC157   | 0.278238815  | 7.647708784  | 6.81E-14 | 6.59E-13 no |
| MAGEF1    | -0.278176361 | -7.645848172 | 6.90E-14 | 6.68E-13 no |
| HNRNPA1L2 | -0.278169776 | -7.645651986 | 6.91E-14 | 6.68E-13 no |

|           |              |              |          |             |
|-----------|--------------|--------------|----------|-------------|
| ECM1      | 0.278164188  | 7.64548554   | 6.92E-14 | 6.69E-13 no |
| SHANK2    | -0.278109308 | -7.643850669 | 7.00E-14 | 6.76E-13 no |
| ATP1B3    | 0.278046581  | 7.641982129  | 7.09E-14 | 6.85E-13 no |
| XRN2      | 0.278016863  | 7.641096925  | 7.14E-14 | 6.89E-13 no |
| CKM       | 0.277980027  | 7.63999972   | 7.20E-14 | 6.94E-13 no |
| SEPP1     | 0.277979812  | 7.639993311  | 7.20E-14 | 6.94E-13 no |
| ICAM4     | 0.277975428  | 7.639862728  | 7.20E-14 | 6.94E-13 no |
| TMOD2     | -0.277921789 | -7.638265104 | 7.29E-14 | 7.02E-13 no |
| OSM       | 0.277917381  | 7.638133827  | 7.29E-14 | 7.02E-13 no |
| FAM176B   | 0.277779149  | 7.634016996  | 7.51E-14 | 7.23E-13 no |
| GGA2      | 0.277753429  | 7.633251043  | 7.55E-14 | 7.27E-13 no |
| CHCHD7    | 0.277743474  | 7.632954596  | 7.57E-14 | 7.28E-13 no |
| TMBIM4    | 0.277727862  | 7.632489682  | 7.59E-14 | 7.30E-13 no |
| KLF12     | -0.277713946 | -7.6320753   | 7.62E-14 | 7.32E-13 no |
| SAMD14    | -0.277646004 | -7.630052151 | 7.73E-14 | 7.42E-13 no |
| C17orf91  | 0.27758564   | 7.62825475   | 7.83E-14 | 7.51E-13 no |
| KAT5      | -0.277568127 | -7.627733302 | 7.86E-14 | 7.54E-13 no |
| C8orf42   | -0.277491776 | -7.625460063 | 7.99E-14 | 7.66E-13 no |
| ACCN2     | -0.277485504 | -7.625273335 | 8.00E-14 | 7.67E-13 no |
| AMIG02    | 0.277459561  | 7.624500968  | 8.04E-14 | 7.70E-13 no |
| NMUR1     | 0.277451054  | 7.624247706  | 8.05E-14 | 7.71E-13 no |
| IL23R     | 0.277444847  | 7.624062909  | 8.07E-14 | 7.72E-13 no |
| C1QTNF6   | 0.277391463  | 7.622473658  | 8.16E-14 | 7.81E-13 no |
| MALT1     | 0.277319232  | 7.620323399  | 8.28E-14 | 7.92E-13 no |
| DERL1     | 0.277274975  | 7.619006002  | 8.36E-14 | 7.99E-13 no |
| LEPRE1    | 0.277236877  | 7.617871979  | 8.43E-14 | 8.06E-13 no |
| C8orf45   | -0.277185566 | -7.616344696 | 8.52E-14 | 8.14E-13 no |
| MBOAT1    | 0.277183218  | 7.616274805  | 8.53E-14 | 8.14E-13 no |
| ARHGEF19  | 0.277142278  | 7.615056307  | 8.60E-14 | 8.21E-13 no |
| DEGS1     | 0.277101013  | 7.613828127  | 8.68E-14 | 8.28E-13 no |
| CD63      | 0.277076901  | 7.613110537  | 8.72E-14 | 8.31E-13 no |
| IL27RA    | 0.277012499  | 7.611193901  | 8.84E-14 | 8.43E-13 no |
| TSPYL4    | -0.277003378 | -7.610922452 | 8.86E-14 | 8.44E-13 no |
| ARHGAP32  | -0.276925197 | -7.608595918 | 9.01E-14 | 8.57E-13 no |
| MMRN1     | 0.276913806  | 7.608256942  | 9.03E-14 | 8.59E-13 no |
| CCL14     | 0.276875794  | 7.607125856  | 9.10E-14 | 8.66E-13 no |
| HIRIP3    | -0.276851354 | -7.606398612 | 9.15E-14 | 8.70E-13 no |
| BBS12     | 0.27677612   | 7.604160091  | 9.30E-14 | 8.83E-13 no |
| CDC42     | 0.276738485  | 7.603040342  | 9.37E-14 | 8.90E-13 no |
| GM2A      | 0.276716552  | 7.602387794  | 9.42E-14 | 8.94E-13 no |
| NALCN     | -0.276653881 | -7.600523276 | 9.54E-14 | 9.05E-13 no |
| CCL2      | 0.276533477  | 7.596941449  | 9.79E-14 | 9.28E-13 no |
| ELFN2     | -0.276469512 | -7.595038754 | 9.92E-14 | 9.41E-13 no |
| RNF112    | -0.276410007 | -7.59326881  | 1.00E-13 | 9.52E-13 no |
| OPHN1     | -0.276353462 | -7.591587001 | 1.02E-13 | 9.63E-13 no |
| SMOC1     | -0.276341431 | -7.591229174 | 1.02E-13 | 9.65E-13 no |
| USP30     | -0.276274225 | -7.589230431 | 1.03E-13 | 9.79E-13 no |
| LOC284900 | -0.276179102 | -7.586401604 | 1.06E-13 | 9.98E-13 no |
| TAOK2     | -0.276174383 | -7.586261267 | 1.06E-13 | 9.99E-13 no |
| POM121L4P | 0.276112829  | 7.584430873  | 1.07E-13 | 1.01E-12 no |
| MSL3      | 0.276076128  | 7.583339564  | 1.08E-13 | 1.02E-12 no |

|          |              |              |          |             |
|----------|--------------|--------------|----------|-------------|
| MUTED    | 0.275800652  | 7.575149418  | 1.14E-13 | 1.08E-12 no |
| FLT3     | 0.275774138  | 7.574361226  | 1.15E-13 | 1.08E-12 no |
| PCIF1    | -0.275752132 | -7.573707068 | 1.16E-13 | 1.09E-12 no |
| TMEM35   | -0.275739873 | -7.573342655 | 1.16E-13 | 1.09E-12 no |
| B3GAT1   | -0.275675077 | -7.571416617 | 1.17E-13 | 1.11E-12 no |
| C12orf51 | -0.275664531 | -7.571103154 | 1.18E-13 | 1.11E-12 no |
| PXN      | 0.275653717  | 7.570781714  | 1.18E-13 | 1.11E-12 no |
| PTPN9    | 0.275645766  | 7.570545378  | 1.18E-13 | 1.11E-12 no |
| UBE2L6   | 0.275606498  | 7.569378252  | 1.19E-13 | 1.12E-12 no |
| ANXA11   | 0.275585179  | 7.568744616  | 1.20E-13 | 1.12E-12 no |
| CA13     | 0.275555857  | 7.567873109  | 1.20E-13 | 1.13E-12 no |
| CXorf1   | -0.275479259 | -7.565596642 | 1.22E-13 | 1.15E-12 no |
| TWISTNB  | 0.275453158  | 7.564820978  | 1.23E-13 | 1.16E-12 no |
| MSL1     | -0.275437391 | -7.56435241  | 1.23E-13 | 1.16E-12 no |
| SERPINA9 | 0.275281338  | 7.559715222  | 1.28E-13 | 1.20E-12 no |
| LXN      | 0.275249607  | 7.558772379  | 1.28E-13 | 1.20E-12 no |
| MLLT6    | -0.275232029 | -7.558250109 | 1.29E-13 | 1.21E-12 no |
| NPAS3    | -0.275212072 | -7.557657128 | 1.29E-13 | 1.21E-12 no |
| FBX045   | -0.27508122  | -7.553769553 | 1.33E-13 | 1.25E-12 no |
| SNAI1    | 0.275077346  | 7.553654452  | 1.33E-13 | 1.25E-12 no |
| FBLN1    | 0.275069679  | 7.553426674  | 1.33E-13 | 1.25E-12 no |
| ARPP21   | -0.27506336  | -7.55323896  | 1.34E-13 | 1.25E-12 no |
| C3orf55  | 0.275060028  | 7.553139969  | 1.34E-13 | 1.25E-12 no |
| XKR8     | 0.275041963  | 7.552603301  | 1.34E-13 | 1.25E-12 no |
| BRMS1L   | -0.274950924 | -7.549898921 | 1.37E-13 | 1.28E-12 no |
| MIR155HG | 0.274927375  | 7.549199413  | 1.37E-13 | 1.28E-12 no |
| SIGLEC8  | 0.274905584  | 7.548552135  | 1.38E-13 | 1.29E-12 no |
| PELO     | 0.274858452  | 7.547152166  | 1.40E-13 | 1.30E-12 no |
| SNAI2    | 0.274815142  | 7.545865806  | 1.41E-13 | 1.31E-12 no |
| BDKRB2   | 0.274815087  | 7.545864174  | 1.41E-13 | 1.31E-12 no |
| ICA1L    | -0.274775854 | -7.544698919 | 1.42E-13 | 1.32E-12 no |
| NTNG2    | -0.274734251 | -7.54346334  | 1.43E-13 | 1.33E-12 no |
| L2HGDH   | -0.274706523 | -7.542639852 | 1.44E-13 | 1.34E-12 no |
| APBB2    | -0.274693224 | -7.542244901 | 1.44E-13 | 1.34E-12 no |
| CTLA4    | 0.274691921  | 7.542206201  | 1.44E-13 | 1.34E-12 no |
| DKK1     | 0.274684073  | 7.541973125  | 1.45E-13 | 1.34E-12 no |
| ASB9     | 0.274643823  | 7.540777818  | 1.46E-13 | 1.35E-12 no |
| ZNF346   | -0.274525019 | -7.53724995  | 1.50E-13 | 1.39E-12 no |
| TCF25    | -0.274512668 | -7.536883192 | 1.50E-13 | 1.39E-12 no |
| OAF      | 0.274463239  | 7.535415525  | 1.52E-13 | 1.41E-12 no |
| ETHE1    | 0.274322491  | 7.531236729  | 1.56E-13 | 1.45E-12 no |
| PAPOLG   | 0.274232683  | 7.528570613  | 1.59E-13 | 1.47E-12 no |
| DPF1     | -0.274211241 | -7.527934087 | 1.60E-13 | 1.48E-12 no |
| NUMA1    | -0.274187687 | -7.527234912 | 1.61E-13 | 1.49E-12 no |
| FHAD1    | 0.274169355  | 7.526690741  | 1.61E-13 | 1.49E-12 no |
| VSIG10L  | 0.274054636  | 7.523285586  | 1.65E-13 | 1.53E-12 no |
| ATG10    | 0.274024095  | 7.522379107  | 1.66E-13 | 1.54E-12 no |
| C7orf42  | 0.273995683  | 7.521535839  | 1.67E-13 | 1.54E-12 no |
| FAM86C   | 0.27391049   | 7.519007461  | 1.70E-13 | 1.57E-12 no |
| MTRR     | 0.273894761  | 7.518540679  | 1.71E-13 | 1.58E-12 no |
| RABGAP1  | -0.273858048 | -7.517451179 | 1.72E-13 | 1.59E-12 no |

|           |              |              |          |             |
|-----------|--------------|--------------|----------|-------------|
| SPTAN1    | -0.273828071 | -7.516561586 | 1.73E-13 | 1.60E-12 no |
| SQSTM1    | 0.27380423   | 7.515854122  | 1.74E-13 | 1.60E-12 no |
| MYST2     | -0.2737868   | -7.515336893 | 1.75E-13 | 1.61E-12 no |
| ATCAY     | -0.273777386 | -7.515057548 | 1.75E-13 | 1.61E-12 no |
| TNK2      | -0.273756669 | -7.514442791 | 1.76E-13 | 1.62E-12 no |
| ARVCF     | -0.273710728 | -7.513079622 | 1.78E-13 | 1.63E-12 no |
| RAB34     | 0.273696033  | 7.512643588  | 1.78E-13 | 1.64E-12 no |
| KCNIP3    | -0.273681808 | -7.512221509 | 1.79E-13 | 1.64E-12 no |
| COQ10B    | 0.273629488  | 7.510669158  | 1.81E-13 | 1.66E-12 no |
| KIF3A     | -0.27360151  | -7.509839073 | 1.82E-13 | 1.67E-12 no |
| MAP3K6    | 0.273552927  | 7.508397669  | 1.84E-13 | 1.68E-12 no |
| CARD8     | 0.273476106  | 7.506118663  | 1.87E-13 | 1.71E-12 no |
| APLF      | 0.273449206  | 7.505320637  | 1.88E-13 | 1.72E-12 no |
| SAMD1     | -0.273424747 | -7.504595092 | 1.89E-13 | 1.73E-12 no |
| IGFBP7    | 0.273413438  | 7.504259604  | 1.89E-13 | 1.73E-12 no |
| CBX1      | -0.273291828 | -7.500652362 | 1.94E-13 | 1.78E-12 no |
| FAM96A    | 0.273287446  | 7.500522383  | 1.94E-13 | 1.78E-12 no |
| PAAF1     | -0.273271007 | -7.500034792 | 1.95E-13 | 1.78E-12 no |
| BTG1      | 0.273156158  | 7.496628497  | 1.99E-13 | 1.82E-12 no |
| SGSM1     | -0.27311874  | -7.495518807 | 2.01E-13 | 1.84E-12 no |
| NAMPT     | 0.273072436  | 7.494145621  | 2.03E-13 | 1.85E-12 no |
| MICA      | 0.273011056  | 7.492325422  | 2.06E-13 | 1.88E-12 no |
| TNFRSF10D | 0.272996057  | 7.491880657  | 2.06E-13 | 1.88E-12 no |
| GPR162    | -0.272967837 | -7.491043872 | 2.07E-13 | 1.89E-12 no |
| GABRB3    | -0.272961794 | -7.490864666 | 2.08E-13 | 1.89E-12 no |
| RAB5B     | -0.272938126 | -7.490162864 | 2.09E-13 | 1.90E-12 no |
| CRYBB1    | 0.272883347  | 7.488538614  | 2.11E-13 | 1.92E-12 no |
| MTDH      | 0.272794009  | 7.485889835  | 2.15E-13 | 1.96E-12 no |
| ACACA     | -0.272785006 | -7.485622922 | 2.16E-13 | 1.96E-12 no |
| APOC1     | 0.272692609  | 7.4828837    | 2.20E-13 | 2.00E-12 no |
| LAMP1     | 0.272669136  | 7.482187835  | 2.21E-13 | 2.01E-12 no |
| NCK1      | 0.272645245  | 7.481479593  | 2.22E-13 | 2.02E-12 no |
| AGPAT2    | 0.272524292  | 7.477894281  | 2.28E-13 | 2.07E-12 no |
| CLN6      | 0.272516715  | 7.477669689  | 2.28E-13 | 2.07E-12 no |
| SPIN3     | -0.272506681 | -7.47737228  | 2.28E-13 | 2.07E-12 no |
| ERI1      | 0.272408356  | 7.47445801   | 2.33E-13 | 2.12E-12 no |
| SELPLG    | 0.272323353  | 7.471938802  | 2.37E-13 | 2.15E-12 no |
| CLEC1A    | 0.272269667  | 7.470347842  | 2.40E-13 | 2.18E-12 no |
| HAS2      | 0.272207895  | 7.46851732   | 2.43E-13 | 2.20E-12 no |
| PTP4A2    | 0.272193882  | 7.468102086  | 2.44E-13 | 2.21E-12 no |
| DNAJC18   | -0.272082199 | -7.464792836 | 2.50E-13 | 2.26E-12 no |
| BRI3      | 0.272057867  | 7.46407192   | 2.51E-13 | 2.27E-12 no |
| TEX261    | 0.271948576  | 7.46083394   | 2.57E-13 | 2.32E-12 no |
| SLC35C1   | 0.271939775  | 7.4605732    | 2.57E-13 | 2.32E-12 no |
| SERPINB6  | 0.271900007  | 7.459395066  | 2.59E-13 | 2.34E-12 no |
| FAM69B    | -0.271800699 | -7.456453273 | 2.65E-13 | 2.39E-12 no |
| RAB33B    | 0.271790453  | 7.456149755  | 2.65E-13 | 2.40E-12 no |
| GTF2E2    | 0.271751205  | 7.454987184  | 2.67E-13 | 2.41E-12 no |
| ENTPD7    | 0.271657471  | 7.452210837  | 2.73E-13 | 2.46E-12 no |
| SLC9A9    | 0.271439601  | 7.44575855   | 2.85E-13 | 2.57E-12 no |
| DDX25     | -0.271431123 | -7.445507512 | 2.86E-13 | 2.58E-12 no |

|           |              |              |          |             |
|-----------|--------------|--------------|----------|-------------|
| TRAF1     | 0.2713714    | 7.443739029  | 2.89E-13 | 2.61E-12 no |
| IMPDH1    | 0.271360381  | 7.443412754  | 2.90E-13 | 2.61E-12 no |
| TOP2B     | -0.271342723 | -7.442889887 | 2.91E-13 | 2.62E-12 no |
| KIAA1279  | -0.271277572 | -7.440960821 | 2.95E-13 | 2.66E-12 no |
| BMP1      | 0.271226499  | 7.439448673  | 2.98E-13 | 2.68E-12 no |
| HDAC4     | -0.271173168 | -7.437869763 | 3.02E-13 | 2.71E-12 no |
| SATB1     | -0.271153318 | -7.437282074 | 3.03E-13 | 2.72E-12 no |
| RIOK3     | 0.271129222  | 7.436568731  | 3.04E-13 | 2.73E-12 no |
| PRPF40B   | -0.271097183 | -7.435620243 | 3.06E-13 | 2.75E-12 no |
| CREM      | 0.271056756  | 7.434423486  | 3.09E-13 | 2.77E-12 no |
| PCGF2     | -0.271029863 | -7.433627409 | 3.11E-13 | 2.79E-12 no |
| CCDC120   | -0.270984097 | -7.432272663 | 3.14E-13 | 2.81E-12 no |
| SCARF1    | 0.270972824  | 7.431938996  | 3.14E-13 | 2.82E-12 no |
| FAM78B    | 0.270963978  | 7.431677138  | 3.15E-13 | 2.82E-12 no |
| HINT3     | -0.270803036 | -7.426913578 | 3.26E-13 | 2.92E-12 no |
| MKRN3     | -0.270761455 | -7.425682986 | 3.28E-13 | 2.94E-12 no |
| GNAI2     | 0.27075959   | 7.425627785  | 3.29E-13 | 2.94E-12 no |
| MGC57346  | -0.270751203 | -7.425379554 | 3.29E-13 | 2.94E-12 no |
| PDGFRL    | 0.270678591  | 7.423230714  | 3.34E-13 | 2.99E-12 no |
| P2RY13    | 0.270629961  | 7.421791641  | 3.37E-13 | 3.02E-12 no |
| CSMD3     | -0.270596257 | -7.420794307 | 3.40E-13 | 3.03E-12 no |
| MAGEH1    | -0.270572411 | -7.420088709 | 3.42E-13 | 3.05E-12 no |
| SLITRK1   | -0.270499645 | -7.417935628 | 3.47E-13 | 3.09E-12 no |
| COTL1     | 0.270463065  | 7.416853327  | 3.49E-13 | 3.12E-12 no |
| TPST2     | 0.270354507  | 7.413641544  | 3.57E-13 | 3.19E-12 no |
| LRP10     | 0.270296499  | 7.411925474  | 3.62E-13 | 3.22E-12 no |
| PLOD2     | 0.270249369  | 7.410531268  | 3.65E-13 | 3.25E-12 no |
| SBF1      | -0.270238523 | -7.410210442 | 3.66E-13 | 3.26E-12 no |
| C11orf2   | -0.270220963 | -7.409690974 | 3.67E-13 | 3.27E-12 no |
| TCTEX1D4  | 0.270188603  | 7.408733771  | 3.70E-13 | 3.29E-12 no |
| CELSR1    | 0.270174551  | 7.40831812   | 3.71E-13 | 3.30E-12 no |
| MFAP3     | 0.270162249  | 7.40795422   | 3.72E-13 | 3.30E-12 no |
| IFT57     | 0.270107464  | 7.406333743  | 3.76E-13 | 3.34E-12 no |
| CAMSAP1L1 | -0.270032518 | -7.404117088 | 3.82E-13 | 3.39E-12 no |
| DACT3     | -0.270016679 | -7.403648635 | 3.83E-13 | 3.40E-12 no |
| IKBKB     | 0.270009413  | 7.403433724  | 3.84E-13 | 3.40E-12 no |
| SH3PXD2B  | 0.269987501  | 7.402785691  | 3.85E-13 | 3.42E-12 no |
| ECHDC3    | 0.269981025  | 7.402594151  | 3.86E-13 | 3.42E-12 no |
| TOR3A     | 0.269952964  | 7.401764292  | 3.88E-13 | 3.44E-12 no |
| ZBP1      | 0.269910393  | 7.400505306  | 3.92E-13 | 3.47E-12 no |
| CDC42BPB  | -0.269813215 | -7.397631605 | 4.00E-13 | 3.54E-12 no |
| TUBA1C    | 0.269811406  | 7.39757811   | 4.00E-13 | 3.54E-12 no |
| SYDE1     | 0.269797528  | 7.397167752  | 4.01E-13 | 3.55E-12 no |
| GTF2F2    | -0.26974123  | -7.395503057 | 4.06E-13 | 3.59E-12 no |
| RFX8      | 0.269727693  | 7.395102803  | 4.07E-13 | 3.59E-12 no |
| FCHSD2    | -0.269721975 | -7.394933725 | 4.07E-13 | 3.60E-12 no |
| ITGB5     | 0.269653893  | 7.392920736  | 4.13E-13 | 3.65E-12 no |
| DGKA      | 0.269606971  | 7.391533457  | 4.17E-13 | 3.68E-12 no |
| TRAK1     | -0.269601478 | -7.391371053 | 4.17E-13 | 3.68E-12 no |
| PTGIR     | 0.269588529  | 7.390988219  | 4.19E-13 | 3.69E-12 no |
| PPP1R9A   | -0.269574935 | -7.390586343 | 4.20E-13 | 3.70E-12 no |

|              |              |              |          |             |
|--------------|--------------|--------------|----------|-------------|
| SLC35B3      | 0.269565401  | 7.390304461  | 4.21E-13 | 3.70E-12 no |
| IP6K1        | -0.269497593 | -7.388299866 | 4.26E-13 | 3.76E-12 no |
| CHRNA2       | -0.269494872 | -7.38821942  | 4.27E-13 | 3.76E-12 no |
| SAFB         | -0.26943972  | -7.386589042 | 4.32E-13 | 3.80E-12 no |
| BCR          | -0.269343646 | -7.383749158 | 4.40E-13 | 3.87E-12 no |
| FHL2         | 0.269315869  | 7.382928117  | 4.43E-13 | 3.89E-12 no |
| ALDH16A1     | 0.269297759  | 7.382392835  | 4.44E-13 | 3.90E-12 no |
| LOC100240735 | 0.269235489  | 7.380552383  | 4.50E-13 | 3.95E-12 no |
| OSBPL3       | 0.269168036  | 7.378558827  | 4.56E-13 | 4.01E-12 no |
| LDLRAD2      | 0.269160939  | 7.378349097  | 4.57E-13 | 4.01E-12 no |
| TMEM138      | 0.269085647  | 7.376124047  | 4.64E-13 | 4.07E-12 no |
| PVRL1        | -0.268997496 | -7.373519144 | 4.73E-13 | 4.14E-12 no |
| PELP1        | -0.268939846 | -7.371815656 | 4.78E-13 | 4.19E-12 no |
| C20orf72     | 0.268911644  | 7.370982356  | 4.81E-13 | 4.21E-12 no |
| MED24        | -0.268891956 | -7.370400638 | 4.83E-13 | 4.23E-12 no |
| SUSD1        | 0.268827866  | 7.368507058  | 4.89E-13 | 4.28E-12 no |
| TBX21        | 0.26879825   | 7.367632073  | 4.92E-13 | 4.31E-12 no |
| BEX4         | -0.268626172 | -7.362548541 | 5.10E-13 | 4.46E-12 no |
| PAPPA2       | 0.268598377  | 7.361727492  | 5.13E-13 | 4.49E-12 no |
| TMEM8A       | 0.268477254  | 7.358149842  | 5.26E-13 | 4.60E-12 no |
| PIGN         | 0.26841943   | 7.356441974  | 5.32E-13 | 4.65E-12 no |
| PLEKHA2      | 0.268414716  | 7.356302749  | 5.33E-13 | 4.65E-12 no |
| CCL11        | 0.268377801  | 7.355212511  | 5.37E-13 | 4.68E-12 no |
| HMP19        | -0.268373296 | -7.355079465 | 5.37E-13 | 4.69E-12 no |
| ATP6V0A1     | -0.268313755 | -7.353321092 | 5.44E-13 | 4.74E-12 no |
| HSFX2        | -0.268284473 | -7.352456332 | 5.47E-13 | 4.77E-12 no |
| KIF1A        | -0.268266529 | -7.351926429 | 5.49E-13 | 4.78E-12 no |
| LRRC15       | 0.268181155  | 7.349405409  | 5.59E-13 | 4.87E-12 no |
| UAP1         | 0.268134861  | 7.348038427  | 5.64E-13 | 4.91E-12 no |
| UBE3C        | 0.26811207   | 7.347365504  | 5.67E-13 | 4.93E-12 no |
| GNAZ         | -0.268060862 | -7.345853521 | 5.73E-13 | 4.98E-12 no |
| RGS12        | -0.268041633 | -7.345285799 | 5.75E-13 | 5.00E-12 no |
| TNFRSF18     | 0.268033446  | 7.34504407   | 5.76E-13 | 5.01E-12 no |
| DRP2         | -0.268002016 | -7.344116138 | 5.80E-13 | 5.04E-12 no |
| EDC4         | -0.267993326 | -7.343859574 | 5.81E-13 | 5.04E-12 no |
| GPRIN1       | -0.26786961  | -7.340207227 | 5.96E-13 | 5.17E-12 no |
| CSPG5        | -0.267819567 | -7.338729969 | 6.02E-13 | 5.22E-12 no |
| NAP1L5       | -0.267740842 | -7.336406175 | 6.12E-13 | 5.30E-12 no |
| RIT1         | 0.267691225  | 7.334941641  | 6.18E-13 | 5.36E-12 no |
| STARD10      | -0.267686248 | -7.334794743 | 6.19E-13 | 5.36E-12 no |
| PLP2         | 0.267678263  | 7.334559069  | 6.20E-13 | 5.37E-12 no |
| TRAM2        | 0.267660141  | 7.334024173  | 6.22E-13 | 5.38E-12 no |
| DYNC1H1      | -0.267514047 | -7.329712495 | 6.41E-13 | 5.54E-12 no |
| CIRBP        | -0.26750984  | -7.329588336 | 6.41E-13 | 5.54E-12 no |
| YIPF4        | 0.267509057  | 7.329565229  | 6.41E-13 | 5.54E-12 no |
| MXI1         | -0.267461439 | -7.328159986 | 6.48E-13 | 5.60E-12 no |
| TMEM59L      | -0.267400535 | -7.326362779 | 6.56E-13 | 5.66E-12 no |
| BCL2L12      | 0.267384397  | 7.325886574  | 6.58E-13 | 5.68E-12 no |
| TSKS         | 0.267366376  | 7.325354814  | 6.60E-13 | 5.70E-12 no |
| ZFP62        | -0.267339924 | -7.324574276 | 6.64E-13 | 5.73E-12 no |
| DLGAP1       | -0.267167986 | -7.319501312 | 6.88E-13 | 5.93E-12 no |

|           |              |              |          |             |
|-----------|--------------|--------------|----------|-------------|
| KLHDC3    | -0.267157496 | -7.319191836 | 6.89E-13 | 5.94E-12 no |
| C5orf62   | 0.267095552  | 7.317364392  | 6.98E-13 | 6.01E-12 no |
| PDZD9     | -0.266918741 | -7.312148742 | 7.24E-13 | 6.23E-12 no |
| CALR      | 0.26689839   | 7.311548497  | 7.27E-13 | 6.25E-12 no |
| MYST1     | -0.26687728  | -7.310925853 | 7.30E-13 | 6.28E-12 no |
| FBLL1     | -0.266746219 | -7.307060391 | 7.49E-13 | 6.45E-12 no |
| FAM133A   | -0.266703479 | -7.305799938 | 7.56E-13 | 6.50E-12 no |
| PAPSS2    | 0.266678789  | 7.305071846  | 7.60E-13 | 6.53E-12 no |
| HDAC5     | -0.266659107 | -7.304491408 | 7.63E-13 | 6.55E-12 no |
| CD97      | 0.266635416  | 7.303792793  | 7.67E-13 | 6.58E-12 no |
| SLC1A6    | -0.26649556  | -7.299668818 | 7.89E-13 | 6.77E-12 no |
| LOC221710 | -0.266459719 | -7.298612048 | 7.95E-13 | 6.82E-12 no |
| CXXC4     | -0.266427287 | -7.297655825 | 8.00E-13 | 6.86E-12 no |
| MFNG      | 0.266413046  | 7.297235961  | 8.02E-13 | 6.87E-12 no |
| ULK4      | 0.266374563  | 7.296101359  | 8.08E-13 | 6.93E-12 no |
| IL1F6     | 0.266158488  | 7.289731569  | 8.45E-13 | 7.23E-12 no |
| MUC1      | 0.266151865  | 7.289536357  | 8.46E-13 | 7.24E-12 no |
| FBXO32    | 0.26601252   | 7.285429169  | 8.70E-13 | 7.45E-12 no |
| PIM3      | 0.266007946  | 7.285294362  | 8.71E-13 | 7.45E-12 no |
| NUDT11    | -0.265959995 | -7.283881133 | 8.79E-13 | 7.52E-12 no |
| BRD3      | -0.265883819 | -7.281636144 | 8.93E-13 | 7.63E-12 no |
| SLIT1     | -0.265855448 | -7.280800074 | 8.98E-13 | 7.67E-12 no |
| CYB561D2  | 0.265796315  | 7.279057512  | 9.09E-13 | 7.76E-12 no |
| ATP9A     | -0.265760512 | -7.278002515 | 9.16E-13 | 7.82E-12 no |
| SCAI      | -0.265736918 | -7.277307282 | 9.20E-13 | 7.85E-12 no |
| NRBF2     | 0.265711334  | 7.276553412  | 9.25E-13 | 7.89E-12 no |
| FBXW11    | -0.265700119 | -7.276222951 | 9.27E-13 | 7.90E-12 no |
| SPCS3     | 0.265694673  | 7.276062487  | 9.28E-13 | 7.91E-12 no |
| KCNN4     | 0.265693123  | 7.276016833  | 9.28E-13 | 7.91E-12 no |
| CAMSAP1   | -0.265576744 | -7.272587889 | 9.51E-13 | 8.09E-12 no |
| PDLIM7    | 0.265474514  | 7.269576115  | 9.71E-13 | 8.26E-12 no |
| THBS2     | 0.265459115  | 7.269122459  | 9.74E-13 | 8.28E-12 no |
| HEBP1     | 0.265433916  | 7.268380119  | 9.79E-13 | 8.32E-12 no |
| PLEK2     | 0.265404644  | 7.267517829  | 9.84E-13 | 8.37E-12 no |
| VASN      | 0.26539205   | 7.26714683   | 9.87E-13 | 8.38E-12 no |
| ZNF48     | -0.265271068 | -7.263583185 | 1.01E-12 | 8.59E-12 no |
| KIAA1919  | 0.265225621  | 7.262244604  | 1.02E-12 | 8.66E-12 no |
| RPS6KA4   | 0.265221275  | 7.262116601  | 1.02E-12 | 8.67E-12 no |
| ZADH2     | -0.265114383 | -7.258968439 | 1.04E-12 | 8.85E-12 no |
| ATR       | 0.265044258  | 7.256903284  | 1.06E-12 | 8.97E-12 no |
| FTSJD1    | 0.265043478  | 7.256880323  | 1.06E-12 | 8.97E-12 no |
| C20orf30  | 0.264945956  | 7.254008554  | 1.08E-12 | 9.15E-12 no |
| CELF5     | -0.264944852 | -7.253976032 | 1.08E-12 | 9.15E-12 no |
| CRAMP1L   | -0.264943907 | -7.253948222 | 1.08E-12 | 9.15E-12 no |
| CLEC11A   | 0.264912196  | 7.253014445  | 1.09E-12 | 9.20E-12 no |
| PTGR1     | 0.26491029   | 7.252958322  | 1.09E-12 | 9.20E-12 no |
| LOC219347 | -0.264870345 | -7.251782152 | 1.10E-12 | 9.27E-12 no |
| STBD1     | 0.264812415  | 7.250076505  | 1.11E-12 | 9.38E-12 no |
| C14orf132 | -0.264744047 | -7.248063618 | 1.13E-12 | 9.50E-12 no |
| FLJ35220  | -0.264728761 | -7.24761357  | 1.13E-12 | 9.53E-12 no |
| DIRAS3    | 0.264653592  | 7.245400603  | 1.15E-12 | 9.67E-12 no |



|           |              |              |          |             |
|-----------|--------------|--------------|----------|-------------|
| CD151     | 0.264639773  | 7.244993807  | 1.15E-12 | 9.69E-12 no |
| EZH1      | -0.264638876 | -7.24496738  | 1.15E-12 | 9.69E-12 no |
| MGP       | 0.264584479  | 7.243366063  | 1.16E-12 | 9.79E-12 no |
| TSPAN2    | 0.264577742  | 7.243167755  | 1.16E-12 | 9.80E-12 no |
| C20orf134 | 0.264572201  | 7.243004637  | 1.16E-12 | 9.81E-12 no |
| HABP4     | -0.264432181 | -7.238883149 | 1.20E-12 | 1.01E-11 no |
| S100A6    | 0.264410124  | 7.23823392   | 1.20E-12 | 1.01E-11 no |
| TUBG2     | -0.264395619 | -7.237807019 | 1.21E-12 | 1.02E-11 no |
| SHD       | -0.264376306 | -7.237238596 | 1.21E-12 | 1.02E-11 no |
| CYSLTR1   | 0.264344423  | 7.236300221  | 1.22E-12 | 1.02E-11 no |
| NRBP1     | 0.264342035  | 7.236229954  | 1.22E-12 | 1.03E-11 no |
| BICC1     | 0.264337763  | 7.23610422   | 1.22E-12 | 1.03E-11 no |
| GNPDA1    | 0.264295584  | 7.234862873  | 1.23E-12 | 1.03E-11 no |
| TXNRD1    | 0.264254799  | 7.233662584  | 1.24E-12 | 1.04E-11 no |
| PTPRT     | -0.264242314 | -7.233295176 | 1.25E-12 | 1.04E-11 no |
| RIMBP3C   | 0.264236341  | 7.233119389  | 1.25E-12 | 1.04E-11 no |
| BTRC      | -0.264222371 | -7.232708295 | 1.25E-12 | 1.05E-11 no |
| DHRS3     | 0.264193415  | 7.231856165  | 1.26E-12 | 1.05E-11 no |
| ZFP2      | -0.264139289 | -7.230263432 | 1.27E-12 | 1.06E-11 no |
| C10orf4   | -0.264063745 | -7.228040556 | 1.29E-12 | 1.08E-11 no |
| YTHDC1    | -0.263896523 | -7.22312056  | 1.33E-12 | 1.12E-11 no |
| KIF21B    | -0.263860214 | -7.222052355 | 1.34E-12 | 1.12E-11 no |
| GRIPAP1   | -0.263753029 | -7.218899234 | 1.37E-12 | 1.15E-11 no |
| C6orf174  | -0.26371026  | -7.217641156 | 1.39E-12 | 1.16E-11 no |
| CCDC134   | 0.263709578  | 7.2176211    | 1.39E-12 | 1.16E-11 no |
| TMSB10    | 0.263649421  | 7.215851591  | 1.40E-12 | 1.17E-11 no |
| AKAP6     | -0.263627068 | -7.215194124 | 1.41E-12 | 1.18E-11 no |
| S1PR3     | 0.26359115   | 7.214137685  | 1.42E-12 | 1.18E-11 no |
| OASL      | 0.263588928  | 7.21407232   | 1.42E-12 | 1.18E-11 no |
| NEK6      | 0.263584928  | 7.21395469   | 1.42E-12 | 1.18E-11 no |
| MAPK8IP2  | -0.263527465 | -7.212264616 | 1.44E-12 | 1.20E-11 no |
| ECE1      | 0.263503096  | 7.211547921  | 1.44E-12 | 1.20E-11 no |
| ZBTB47    | -0.263494772 | -7.211303117 | 1.45E-12 | 1.20E-11 no |
| RAG1      | 0.263480346  | 7.210878849  | 1.45E-12 | 1.21E-11 no |
| SUV420H1  | -0.26341738  | -7.209027098 | 1.47E-12 | 1.22E-11 no |
| EFEMP1    | 0.263345823  | 7.206922818  | 1.49E-12 | 1.24E-11 no |
| MAGT1     | 0.263337045  | 7.206664678  | 1.49E-12 | 1.24E-11 no |
| A2LD1     | 0.263304083  | 7.205695437  | 1.50E-12 | 1.25E-11 no |
| LOC92973  | -0.263279415 | -7.204970079 | 1.51E-12 | 1.25E-11 no |
| NFATC3    | 0.263254744  | 7.204244637  | 1.52E-12 | 1.26E-11 no |
| SFXN1     | -0.263119731 | -7.200274957 | 1.56E-12 | 1.29E-11 no |
| TBC1D19   | 0.263033864  | 7.197750526  | 1.59E-12 | 1.32E-11 no |
| GALNT3    | 0.26300579   | 7.196925202  | 1.60E-12 | 1.32E-11 no |
| PSME4     | 0.262978297  | 7.196117007  | 1.61E-12 | 1.33E-11 no |
| TMED2     | 0.262968045  | 7.195815614  | 1.61E-12 | 1.33E-11 no |
| WDR59     | -0.262958283 | -7.195528645 | 1.61E-12 | 1.33E-11 no |
| BRF1      | -0.262934913 | -7.19484165  | 1.62E-12 | 1.34E-11 no |
| GLIS3     | 0.262894706  | 7.193659763  | 1.63E-12 | 1.35E-11 no |
| MEIS3     | -0.262880866 | -7.193252951 | 1.64E-12 | 1.35E-11 no |
| SCG3      | -0.262807724 | -7.191103019 | 1.66E-12 | 1.37E-11 no |
| THOP1     | -0.2628028   | -7.190958298 | 1.66E-12 | 1.37E-11 no |

|          |              |              |          |             |
|----------|--------------|--------------|----------|-------------|
| TXNDC16  | -0.262772915 | -7.19007993  | 1.67E-12 | 1.38E-11 no |
| RHOBTB1  | 0.262771784  | 7.190046682  | 1.67E-12 | 1.38E-11 no |
| ZMYM6    | 0.262732843  | 7.188902161  | 1.69E-12 | 1.39E-11 no |
| CPSF7    | -0.262694075 | -7.187762753 | 1.70E-12 | 1.40E-11 no |
| BRD8     | -0.262615142 | -7.185442984 | 1.73E-12 | 1.42E-11 no |
| 15-Sep   | 0.262609145  | 7.185266743  | 1.73E-12 | 1.42E-11 no |
| DPP9     | 0.262585229  | 7.184563932  | 1.74E-12 | 1.43E-11 no |
| FBLN2    | 0.262579712  | 7.184401798  | 1.74E-12 | 1.43E-11 no |
| PLIN3    | 0.262554813  | 7.183670093  | 1.75E-12 | 1.44E-11 no |
| MYLK     | 0.262547183  | 7.183445862  | 1.75E-12 | 1.44E-11 no |
| KLF3     | 0.262510016  | 7.182353695  | 1.76E-12 | 1.45E-11 no |
| SPAST    | -0.262497181 | -7.181976551 | 1.77E-12 | 1.45E-11 no |
| ADAMTS12 | 0.262490994  | 7.181794744  | 1.77E-12 | 1.45E-11 no |
| PSMA8    | 0.262476722  | 7.181375363  | 1.78E-12 | 1.46E-11 no |
| ACAA2    | 0.262249152  | 7.174688982  | 1.86E-12 | 1.53E-11 no |
| ZNF839   | -0.262211793 | -7.173591431 | 1.87E-12 | 1.54E-11 no |
| PATL2    | 0.262157386  | 7.171993094  | 1.89E-12 | 1.55E-11 no |
| NGFRAP1  | -0.262054823 | -7.168980277 | 1.93E-12 | 1.58E-11 no |
| FAR2     | 0.26204799   | 7.168779585  | 1.93E-12 | 1.59E-11 no |
| LYSMD1   | -0.262025107 | -7.16810742  | 1.94E-12 | 1.59E-11 no |
| ETV7     | 0.262023041  | 7.168046739  | 1.94E-12 | 1.59E-11 no |
| AK2      | 0.261989846  | 7.167071707  | 1.96E-12 | 1.60E-11 no |
| HK2      | 0.26195064   | 7.165920153  | 1.97E-12 | 1.61E-11 no |
| STARD8   | 0.26193699   | 7.165519237  | 1.98E-12 | 1.62E-11 no |
| MTMR1    | -0.261922711 | -7.16509985  | 1.98E-12 | 1.62E-11 no |
| XAF1     | 0.2617836    | 7.161014296  | 2.04E-12 | 1.67E-11 no |
| FAM83G   | 0.26177732   | 7.160829879  | 2.04E-12 | 1.67E-11 no |
| BRD7     | -0.261701322 | -7.158598092 | 2.07E-12 | 1.69E-11 no |
| CTF1     | 0.261684106  | 7.158092557  | 2.08E-12 | 1.70E-11 no |
| PAFAH1B1 | -0.261671225 | -7.157714316 | 2.09E-12 | 1.70E-11 no |
| GRID1    | -0.261650359 | -7.157101594 | 2.09E-12 | 1.71E-11 no |
| RBKS     | 0.261624362  | 7.156338222  | 2.10E-12 | 1.72E-11 no |
| COL6A1   | 0.261599337  | 7.15560341   | 2.12E-12 | 1.72E-11 no |
| DBNL     | 0.261548034  | 7.154097059  | 2.14E-12 | 1.74E-11 no |
| HDAC1    | 0.261489412  | 7.15237586   | 2.16E-12 | 1.76E-11 no |
| RBMS2    | 0.261445133  | 7.151075868  | 2.18E-12 | 1.78E-11 no |
| C15orf59 | -0.261440305 | -7.150934123 | 2.18E-12 | 1.78E-11 no |
| AKAP1    | -0.26142797  | -7.150571976 | 2.19E-12 | 1.78E-11 no |
| RHOA     | 0.261422264  | 7.15040446   | 2.19E-12 | 1.78E-11 no |
| C22orf36 | -0.261410436 | -7.150057217 | 2.20E-12 | 1.79E-11 no |
| SERPINE1 | 0.261261046  | 7.145671685  | 2.26E-12 | 1.84E-11 no |
| LRRTM4   | -0.261250538 | -7.145363241 | 2.27E-12 | 1.84E-11 no |
| PPFIBP1  | 0.261153211  | 7.142506404  | 2.31E-12 | 1.88E-11 no |
| NGRN     | -0.261132979 | -7.141912563 | 2.32E-12 | 1.88E-11 no |
| C10orf2  | -0.261122215 | -7.141596642 | 2.33E-12 | 1.89E-11 no |
| USP27X   | -0.261096076 | -7.140829431 | 2.34E-12 | 1.90E-11 no |
| HSD11B1L | -0.261061893 | -7.13982618  | 2.35E-12 | 1.91E-11 no |
| FAM117B  | -0.261053103 | -7.139568189 | 2.36E-12 | 1.91E-11 no |
| PIGP     | 0.260973588  | 7.137234586  | 2.40E-12 | 1.94E-11 no |
| SH3BGRL  | 0.260957842  | 7.136772475  | 2.40E-12 | 1.95E-11 no |
| CDC42EP3 | 0.260945945  | 7.136423332  | 2.41E-12 | 1.95E-11 no |

|          |              |              |          |             |
|----------|--------------|--------------|----------|-------------|
| SLC24A3  | -0.260852704 | -7.133687147 | 2.45E-12 | 1.99E-11 no |
| MADD     | -0.260831721 | -7.133071409 | 2.46E-12 | 1.99E-11 no |
| PCDH18   | 0.26077689   | 7.131462518  | 2.49E-12 | 2.01E-11 no |
| CPA4     | 0.260768541  | 7.131217527  | 2.50E-12 | 2.02E-11 no |
| SYNGAP1  | -0.260762183 | -7.13103097  | 2.50E-12 | 2.02E-11 no |
| YPEL1    | -0.260721873 | -7.129848217 | 2.52E-12 | 2.03E-11 no |
| FLJ10038 | -0.260674637 | -7.128462276 | 2.54E-12 | 2.05E-11 no |
| ATG4C    | 0.260666002  | 7.128208945  | 2.55E-12 | 2.05E-11 no |
| SEPHS1   | -0.260643791 | -7.127557285 | 2.56E-12 | 2.06E-11 no |
| SLC9A1   | 0.260548469  | 7.124760719  | 2.61E-12 | 2.10E-11 no |
| PPP2R2D  | -0.260458916 | -7.122133624 | 2.65E-12 | 2.14E-11 no |
| VWF      | 0.260453853  | 7.121985118  | 2.66E-12 | 2.14E-11 no |
| PLBD2    | 0.260452777  | 7.121953529  | 2.66E-12 | 2.14E-11 no |
| NOVA1    | -0.26034216  | -7.118708805 | 2.72E-12 | 2.19E-11 no |
| TGIF1    | 0.260340131  | 7.118649283  | 2.72E-12 | 2.19E-11 no |
| RPS6KL1  | -0.260307646 | -7.117696463 | 2.73E-12 | 2.20E-11 no |
| JAKMIP2  | -0.26019988  | -7.11453575  | 2.79E-12 | 2.25E-11 no |
| ILF3     | -0.260135435 | -7.112645728 | 2.83E-12 | 2.27E-11 no |
| RARRES2  | 0.260127943  | 7.112426009  | 2.83E-12 | 2.28E-11 no |
| REPS1    | -0.260114295 | -7.112025762 | 2.84E-12 | 2.28E-11 no |
| PHF21A   | -0.260093616 | -7.111419331 | 2.85E-12 | 2.29E-11 no |
| ARF4     | 0.260062617  | 7.110510288  | 2.87E-12 | 2.30E-11 no |
| ECSIT    | -0.2600003   | -7.108682915 | 2.91E-12 | 2.33E-11 no |
| PMS2L11  | 0.25998795   | 7.108320767  | 2.91E-12 | 2.34E-11 no |
| RNF126P1 | 0.259927048  | 7.106534962  | 2.95E-12 | 2.36E-11 no |
| ZC3H12B  | -0.259867898 | -7.104800649 | 2.98E-12 | 2.39E-11 no |
| B3GALT4  | 0.259831089  | 7.103721432  | 3.01E-12 | 2.41E-11 no |
| MYST4    | -0.2598219   | -7.103452006 | 3.01E-12 | 2.41E-11 no |
| RTCD1    | 0.259777287  | 7.102144032  | 3.04E-12 | 2.43E-11 no |
| MARCKSL1 | -0.25977571  | -7.102097806 | 3.04E-12 | 2.43E-11 no |
| TPTE2P1  | -0.259736963 | -7.100961845 | 3.06E-12 | 2.45E-11 no |
| FBRSL1   | -0.259661002 | -7.098734968 | 3.11E-12 | 2.48E-11 no |
| USP43    | -0.259652097 | -7.098473927 | 3.11E-12 | 2.49E-11 no |
| SIRPD    | 0.2596486    | 7.098371402  | 3.12E-12 | 2.49E-11 no |
| 6-Sep    | 0.259627717  | 7.097759226  | 3.13E-12 | 2.50E-11 no |
| PCDH7    | -0.259463546 | -7.092947032 | 3.23E-12 | 2.58E-11 no |
| C7orf49  | 0.259437861  | 7.09219419   | 3.25E-12 | 2.59E-11 no |
| PDIA6    | 0.25942346   | 7.091772107  | 3.26E-12 | 2.60E-11 no |
| ITGAV    | 0.259396107  | 7.090970434  | 3.28E-12 | 2.61E-11 no |
| RAB36    | 0.259383446  | 7.090599346  | 3.28E-12 | 2.62E-11 no |
| C9orf89  | 0.259377297  | 7.09041915   | 3.29E-12 | 2.62E-11 no |
| RPN1     | 0.259345727  | 7.089493899  | 3.31E-12 | 2.63E-11 no |
| GPR15    | 0.259333765  | 7.089143317  | 3.32E-12 | 2.64E-11 no |
| TRMT2B   | 0.259322103  | 7.08880156   | 3.32E-12 | 2.64E-11 no |
| SH3YL1   | -0.259314847 | -7.088588916 | 3.33E-12 | 2.65E-11 no |
| USP10    | -0.259303522 | -7.088256993 | 3.34E-12 | 2.65E-11 no |
| KIAA1967 | -0.259261967 | -7.0870392   | 3.36E-12 | 2.67E-11 no |
| KDELR1   | 0.259233386  | 7.086201647  | 3.38E-12 | 2.69E-11 no |
| HES6     | -0.259226787 | -7.086008269 | 3.39E-12 | 2.69E-11 no |
| CLIC3    | 0.259212175  | 7.08558007   | 3.40E-12 | 2.70E-11 no |
| ARMC9    | 0.259208343  | 7.085467771  | 3.40E-12 | 2.70E-11 no |

|              |              |              |          |             |
|--------------|--------------|--------------|----------|-------------|
| RTP4         | 0.25915394   | 7.083873581  | 3.44E-12 | 2.72E-11 no |
| AGAP3        | -0.259108053 | -7.082529022 | 3.47E-12 | 2.75E-11 no |
| ITGA1        | 0.259081268  | 7.081744186  | 3.49E-12 | 2.76E-11 no |
| MYL12B       | 0.259067544  | 7.081342068  | 3.49E-12 | 2.77E-11 no |
| DAP3         | 0.259067475  | 7.081340047  | 3.50E-12 | 2.77E-11 no |
| EFR3B        | -0.259049575 | -7.080815559 | 3.51E-12 | 2.78E-11 no |
| HSPB1        | 0.259001509  | 7.079407257  | 3.54E-12 | 2.80E-11 no |
| TFAP4        | -0.258998341 | -7.079314426 | 3.54E-12 | 2.80E-11 no |
| FAM190B      | -0.25890601  | -7.076609361 | 3.61E-12 | 2.85E-11 no |
| INPP1        | -0.258901596 | -7.076480037 | 3.61E-12 | 2.85E-11 no |
| PLOD1        | 0.258835236  | 7.074535986  | 3.66E-12 | 2.89E-11 no |
| BET1L        | 0.258813859  | 7.073909743  | 3.67E-12 | 2.90E-11 no |
| C6orf136     | -0.258788333 | -7.073162    | 3.69E-12 | 2.91E-11 no |
| MAPK8IP1     | -0.258745988 | -7.07192157  | 3.72E-12 | 2.94E-11 no |
| UXS1         | 0.258725964  | 7.071335014  | 3.74E-12 | 2.95E-11 no |
| DGKB         | -0.258725005 | -7.071306915 | 3.74E-12 | 2.95E-11 no |
| SLC35D1      | 0.258709322  | 7.070847553  | 3.75E-12 | 2.96E-11 no |
| ADD1         | -0.258669683 | -7.069686474 | 3.78E-12 | 2.98E-11 no |
| THBS1        | 0.258662834  | 7.069485847  | 3.79E-12 | 2.98E-11 no |
| PRKAA1       | 0.258616407  | 7.068125992  | 3.82E-12 | 3.01E-11 no |
| C17orf96     | -0.258555946 | -7.06635517  | 3.87E-12 | 3.04E-11 no |
| CASKIN2      | -0.258471131 | -7.063876448 | 3.93E-12 | 3.09E-11 no |
| AP3B1        | 0.258465221  | 7.063698133  | 3.94E-12 | 3.09E-11 no |
| LOC100270710 | 0.258462295  | 7.06361242   | 3.94E-12 | 3.09E-11 no |
| DDX42        | -0.258441181 | -7.062994104 | 3.95E-12 | 3.11E-11 no |
| ZNF275       | -0.258385224 | -7.061355411 | 4.00E-12 | 3.14E-11 no |
| PAK7         | -0.258379438 | -7.061185994 | 4.00E-12 | 3.14E-11 no |
| SOX2         | -0.258375168 | -7.061060941 | 4.01E-12 | 3.14E-11 no |
| GFOD2        | -0.258283559 | -7.058378388 | 4.08E-12 | 3.20E-11 no |
| TM9SF2       | 0.258277281  | 7.058194561  | 4.08E-12 | 3.20E-11 no |
| ARID5A       | 0.258267528  | 7.057908981  | 4.09E-12 | 3.21E-11 no |
| C19orf28     | 0.258194834  | 7.055780491  | 4.15E-12 | 3.25E-11 no |
| ATF5         | 0.258187515  | 7.055566202  | 4.16E-12 | 3.25E-11 no |
| CITED2       | 0.258176422  | 7.055241411  | 4.17E-12 | 3.26E-11 no |
| RXRB         | -0.258145025 | -7.054322168 | 4.19E-12 | 3.28E-11 no |
| IRAK1        | 0.258089157  | 7.05268649   | 4.24E-12 | 3.31E-11 no |
| VPS37D       | -0.258075378 | -7.052283092 | 4.25E-12 | 3.32E-11 no |
| GOLPH3L      | 0.258061292  | 7.051870716  | 4.26E-12 | 3.33E-11 no |
| FUS          | -0.257948133 | -7.04855804  | 4.36E-12 | 3.40E-11 no |
| CFDP1        | -0.257880868 | -7.046589016 | 4.41E-12 | 3.45E-11 no |
| REST         | 0.257823502  | 7.044909869  | 4.46E-12 | 3.48E-11 no |
| C13orf29     | 0.257725164  | 7.04203161   | 4.55E-12 | 3.55E-11 no |
| CYB561       | 0.257641666  | 7.039587892  | 4.63E-12 | 3.61E-11 no |
| FARSA        | -0.257598476 | -7.038323914 | 4.67E-12 | 3.64E-11 no |
| HEG1         | 0.25754486   | 7.036754886  | 4.71E-12 | 3.67E-11 no |
| GBP4         | 0.257506853  | 7.035642686  | 4.75E-12 | 3.70E-11 no |
| COL4A2       | 0.257504911  | 7.035585862  | 4.75E-12 | 3.70E-11 no |
| PRPF19       | -0.257499632 | -7.035431388 | 4.76E-12 | 3.70E-11 no |
| MTMR7        | -0.257488478 | -7.035104981 | 4.77E-12 | 3.71E-11 no |
| LIF          | 0.257458951  | 7.034240978  | 4.79E-12 | 3.73E-11 no |
| GPR109B      | 0.257454258  | 7.034103665  | 4.80E-12 | 3.73E-11 no |

|            |              |              |          |             |
|------------|--------------|--------------|----------|-------------|
| RTN1       | -0.257431289 | -7.033431567 | 4.82E-12 | 3.75E-11 no |
| PIM1       | 0.257430648  | 7.033412811  | 4.82E-12 | 3.75E-11 no |
| ATP6AP2    | 0.257377732  | 7.031864486  | 4.87E-12 | 3.78E-11 no |
| DYNLT3     | 0.257359917  | 7.031343228  | 4.89E-12 | 3.80E-11 no |
| RAB40C     | -0.257355896 | -7.031225569 | 4.89E-12 | 3.80E-11 no |
| DYSF       | 0.257337167  | 7.030677584  | 4.91E-12 | 3.81E-11 no |
| USP54      | -0.257253466 | -7.028228706 | 4.99E-12 | 3.87E-11 no |
| PLA1A      | 0.257224216  | 7.027372967  | 5.02E-12 | 3.89E-11 no |
| HELQ       | 0.257196136  | 7.026551481  | 5.05E-12 | 3.91E-11 no |
| HMGCL      | 0.25716834   | 7.025738329  | 5.08E-12 | 3.93E-11 no |
| ADAMTS14   | 0.257135132  | 7.024766855  | 5.11E-12 | 3.96E-11 no |
| SBSN       | 0.257119392  | 7.024306399  | 5.12E-12 | 3.97E-11 no |
| NFATC1     | 0.257030976  | 7.02172004   | 5.21E-12 | 4.03E-11 no |
| RUSC2      | -0.257011586 | -7.021152889 | 5.23E-12 | 4.05E-11 no |
| LRIT2      | -0.257011471 | -7.021149526 | 5.23E-12 | 4.05E-11 no |
| AMACR      | 0.257008712  | 7.021068818  | 5.24E-12 | 4.05E-11 no |
| ACVRL1     | 0.256932398  | 7.01883666   | 5.32E-12 | 4.11E-11 no |
| PHLDB2     | 0.256907954  | 7.018121706  | 5.34E-12 | 4.12E-11 no |
| C1GALT1    | 0.256907329  | 7.018103427  | 5.34E-12 | 4.12E-11 no |
| SALL2      | -0.256820279 | -7.015557483 | 5.43E-12 | 4.19E-11 no |
| SNX32      | -0.256715684 | -7.012498632 | 5.55E-12 | 4.28E-11 no |
| CDHR1      | -0.256710995 | -7.012361522 | 5.55E-12 | 4.28E-11 no |
| FBX06      | 0.256710483  | 7.012346543  | 5.55E-12 | 4.28E-11 no |
| GALNS      | 0.256664557  | 7.011003541  | 5.60E-12 | 4.32E-11 no |
| ZDHHC7     | 0.256594594  | 7.008957715  | 5.68E-12 | 4.37E-11 no |
| C7orf54    | -0.256578844 | -7.008497194 | 5.70E-12 | 4.39E-11 no |
| RASSF1     | 0.256544702  | 7.007498885  | 5.73E-12 | 4.41E-11 no |
| SERPINA3   | 0.256528642  | 7.007029305  | 5.75E-12 | 4.42E-11 no |
| LAYN       | 0.256489818  | 7.005894148  | 5.80E-12 | 4.46E-11 no |
| KIAA0895L  | -0.256473595 | -7.00541984  | 5.81E-12 | 4.47E-11 no |
| C1orf61    | -0.256420686 | -7.003872935 | 5.87E-12 | 4.51E-11 no |
| SORCS3     | -0.25641088  | -7.003586248 | 5.89E-12 | 4.52E-11 no |
| CPNE5      | -0.256325158 | -7.00108015  | 5.98E-12 | 4.60E-11 no |
| VPS26B     | -0.256268059 | -6.999410943 | 6.05E-12 | 4.64E-11 no |
| CELF3      | -0.25622564  | -6.99817097  | 6.10E-12 | 4.68E-11 no |
| ADHFE1     | -0.25620997  | -6.99771289  | 6.12E-12 | 4.69E-11 no |
| DEF8       | -0.256198337 | -6.997372843 | 6.13E-12 | 4.70E-11 no |
| ACTL6B     | -0.256189919 | -6.997126788 | 6.14E-12 | 4.71E-11 no |
| SFRS14     | -0.256188347 | -6.997080837 | 6.15E-12 | 4.71E-11 no |
| MARVELD1   | 0.256176512  | 6.996734883  | 6.16E-12 | 4.72E-11 no |
| PAM        | 0.256171502  | 6.996588451  | 6.17E-12 | 4.72E-11 no |
| WASF1      | -0.256063557 | -6.993433308 | 6.30E-12 | 4.82E-11 no |
| KIAA1199   | 0.256051335  | 6.993076089  | 6.31E-12 | 4.83E-11 no |
| WARS2      | 0.256039872  | 6.992741083  | 6.33E-12 | 4.84E-11 no |
| NFIX       | -0.255983274 | -6.991086903 | 6.40E-12 | 4.89E-11 no |
| NCRNA00219 | -0.255806767 | -6.985928733 | 6.62E-12 | 5.06E-11 no |
| ITPK1      | -0.255802428 | -6.985801938 | 6.63E-12 | 5.06E-11 no |
| MRFAP1L1   | -0.255785879 | -6.985318351 | 6.65E-12 | 5.08E-11 no |
| AGXT2L2    | 0.255759763  | 6.984555214  | 6.68E-12 | 5.10E-11 no |
| ANGPTL5    | 0.255744412  | 6.984106662  | 6.70E-12 | 5.11E-11 no |
| C13orf26   | 0.255729574  | 6.983673089  | 6.72E-12 | 5.13E-11 no |

|           |              |              |          |          |    |
|-----------|--------------|--------------|----------|----------|----|
| EFNA4     | 0.255713606  | 6.983206515  | 6.74E-12 | 5.14E-11 | no |
| PEX5      | -0.255683846 | -6.982336973 | 6.78E-12 | 5.17E-11 | no |
| HIST1H2BK | 0.255662161  | 6.981703354  | 6.81E-12 | 5.19E-11 | no |
| MDGA2     | -0.255660255 | -6.981647668 | 6.81E-12 | 5.19E-11 | no |
| PHF2      | -0.255638653 | -6.981016519 | 6.84E-12 | 5.21E-11 | no |
| FCER1A    | 0.25561317   | 6.980271955  | 6.87E-12 | 5.23E-11 | no |
| C1orf144  | 0.25556759   | 6.978940287  | 6.94E-12 | 5.28E-11 | no |
| TBXA2R    | 0.255532932  | 6.977927735  | 6.98E-12 | 5.31E-11 | no |
| TCEA2     | -0.255503276 | -6.977061354 | 7.02E-12 | 5.34E-11 | no |
| MYO10     | -0.255448422 | -6.975458856 | 7.10E-12 | 5.39E-11 | no |
| ALDH1A3   | 0.255427551  | 6.974849169  | 7.13E-12 | 5.41E-11 | no |
| MAP3K3    | 0.255414234  | 6.974460137  | 7.15E-12 | 5.42E-11 | no |
| DYNLL2    | -0.255404676 | -6.97418093  | 7.16E-12 | 5.43E-11 | no |
| WDR6      | -0.255376496 | -6.973357749 | 7.20E-12 | 5.46E-11 | no |
| DNAJC12   | -0.255375543 | -6.97332992  | 7.20E-12 | 5.46E-11 | no |
| SNAPC4    | -0.255302851 | -6.971206553 | 7.30E-12 | 5.53E-11 | no |
| DGCR2     | -0.255299701 | -6.971114525 | 7.31E-12 | 5.54E-11 | no |
| GPR126    | 0.255292911  | 6.970916213  | 7.32E-12 | 5.54E-11 | no |
| FAM123C   | -0.2551624   | -6.967104269 | 7.50E-12 | 5.68E-11 | no |
| DHTKD1    | -0.255156947 | -6.966945007 | 7.51E-12 | 5.69E-11 | no |
| ZCCHC24   | -0.255134726 | -6.96629604  | 7.54E-12 | 5.71E-11 | no |
| LOC400759 | 0.255122416  | 6.965936528  | 7.56E-12 | 5.72E-11 | no |
| TM9SF1    | 0.255096284  | 6.965173338  | 7.60E-12 | 5.75E-11 | no |
| LRRC4C    | -0.255061299 | -6.964151644 | 7.65E-12 | 5.78E-11 | no |
| HCCS      | 0.255059545  | 6.964100398  | 7.65E-12 | 5.78E-11 | no |
| TMEM61    | 0.255052857  | 6.963905092  | 7.66E-12 | 5.79E-11 | no |
| RRBP1     | 0.25500775   | 6.962587843  | 7.73E-12 | 5.84E-11 | no |
| ARSK      | 0.255005219  | 6.962513921  | 7.74E-12 | 5.84E-11 | no |
| EML5      | -0.254982045 | -6.961837206 | 7.77E-12 | 5.86E-11 | no |
| SUGT1L1   | -0.254935248 | -6.960470666 | 7.84E-12 | 5.91E-11 | no |
| DCAF11    | -0.254928297 | -6.960267685 | 7.85E-12 | 5.92E-11 | no |
| CELSR3    | -0.25486958  | -6.958553156 | 7.94E-12 | 5.98E-11 | no |
| RNPEPL1   | 0.254809244  | 6.956791443  | 8.03E-12 | 6.05E-11 | no |
| SDF4      | 0.25479164   | 6.956277466  | 8.06E-12 | 6.07E-11 | no |
| C11orf63  | 0.254731984  | 6.954535718  | 8.16E-12 | 6.14E-11 | no |
| TGFB3     | 0.254728232  | 6.954426172  | 8.16E-12 | 6.14E-11 | no |
| ATF1      | 0.254689245  | 6.95328794   | 8.22E-12 | 6.19E-11 | no |
| GRIK4     | -0.254681592 | -6.953064498 | 8.24E-12 | 6.19E-11 | no |
| KIRREL    | 0.254629787  | 6.951552114  | 8.32E-12 | 6.25E-11 | no |
| COG1      | -0.254490544 | -6.947487341 | 8.55E-12 | 6.42E-11 | no |
| TTC33     | -0.254475695 | -6.947053904 | 8.57E-12 | 6.44E-11 | no |
| RENBP     | 0.254438094  | 6.945956358  | 8.63E-12 | 6.48E-11 | no |
| NANP      | 0.254436209  | 6.945901346  | 8.64E-12 | 6.48E-11 | no |
| KANK2     | 0.254376919  | 6.944170776  | 8.74E-12 | 6.55E-11 | no |
| ASL       | 0.254371572  | 6.944014709  | 8.74E-12 | 6.56E-11 | no |
| PARP10    | 0.254362984  | 6.943764063  | 8.76E-12 | 6.57E-11 | no |
| ZNF831    | 0.254237441  | 6.940100029  | 8.97E-12 | 6.73E-11 | no |
| GPR114    | 0.254164718  | 6.937977719  | 9.10E-12 | 6.82E-11 | no |
| LRRC14    | -0.25408808  | -6.935741303 | 9.24E-12 | 6.92E-11 | no |
| ORAI3     | 0.254048713  | 6.934592592  | 9.31E-12 | 6.97E-11 | no |
| PSTK      | -0.254018577 | -6.933713251 | 9.36E-12 | 7.01E-11 | no |

|              |              |              |          |             |
|--------------|--------------|--------------|----------|-------------|
| PDGFRB       | 0.254003359  | 6.933269212  | 9.39E-12 | 7.02E-11 no |
| TMEM60       | 0.253986643  | 6.932781447  | 9.42E-12 | 7.04E-11 no |
| GALNT10      | 0.253975772  | 6.932464259  | 9.44E-12 | 7.06E-11 no |
| CALCOCO1     | -0.253965192 | -6.93215557  | 9.46E-12 | 7.07E-11 no |
| SUSD3        | 0.253927343  | 6.93105123   | 9.53E-12 | 7.12E-11 no |
| ADAM8        | 0.253912072  | 6.930605688  | 9.56E-12 | 7.13E-11 no |
| ZNF238       | -0.253895447 | -6.930120615 | 9.59E-12 | 7.16E-11 no |
| EFS          | -0.253860941 | -6.929113883 | 9.65E-12 | 7.20E-11 no |
| LDHB         | -0.253843041 | -6.928591661 | 9.68E-12 | 7.22E-11 no |
| MARK1        | -0.253823514 | -6.928021975 | 9.72E-12 | 7.25E-11 no |
| KDM3B        | -0.253776999 | -6.926664958 | 9.81E-12 | 7.31E-11 no |
| NIPA2        | 0.253769453  | 6.926444813  | 9.82E-12 | 7.32E-11 no |
| WNT2B        | 0.253722913  | 6.925087127  | 9.91E-12 | 7.38E-11 no |
| ERP44        | 0.253720683  | 6.925022091  | 9.92E-12 | 7.38E-11 no |
| MGAT4B       | 0.253666664  | 6.923446291  | 1.00E-11 | 7.46E-11 no |
| GLUD2        | -0.253508208 | -6.918824344 | 1.03E-11 | 7.68E-11 no |
| LOC100128542 | 0.253449554  | 6.917113648  | 1.04E-11 | 7.77E-11 no |
| HPS4         | -0.253416071 | -6.916137114 | 1.05E-11 | 7.82E-11 no |
| LDOC1L       | -0.253363945 | -6.914616909 | 1.06E-11 | 7.89E-11 no |
| KBTBD8       | 0.25335334   | 6.914307647  | 1.06E-11 | 7.91E-11 no |
| PRPF6        | -0.253348047 | -6.914153261 | 1.07E-11 | 7.91E-11 no |
| SDC2         | 0.253333814  | 6.913738197  | 1.07E-11 | 7.93E-11 no |
| HDHD3        | 0.253279474  | 6.91215353   | 1.08E-11 | 8.01E-11 no |
| ZBTB38       | 0.253255506  | 6.911454596  | 1.08E-11 | 8.04E-11 no |
| CXCL13       | 0.253195759  | 6.909712373  | 1.10E-11 | 8.13E-11 no |
| DIRC1        | 0.252938751  | 6.902218967  | 1.15E-11 | 8.54E-11 no |
| HTR7P1       | 0.252890888  | 6.900823625  | 1.16E-11 | 8.62E-11 no |
| ACD          | -0.252843946 | -6.899455203 | 1.17E-11 | 8.69E-11 no |
| LZTS1        | 0.252746368  | 6.89661083   | 1.20E-11 | 8.85E-11 no |
| ARHGEF9      | -0.252739925 | -6.896423026 | 1.20E-11 | 8.86E-11 no |
| RRAGC        | 0.25272755   | 6.896062303  | 1.20E-11 | 8.88E-11 no |
| HAL          | 0.252641508  | 6.893554407  | 1.22E-11 | 9.02E-11 no |
| FADD         | 0.252612407  | 6.892706231  | 1.23E-11 | 9.07E-11 no |
| HM13         | 0.252555082  | 6.891035513  | 1.24E-11 | 9.17E-11 no |
| HIC1         | 0.252549777  | 6.890880904  | 1.24E-11 | 9.17E-11 no |
| AARSD1       | -0.252530925 | -6.890331467 | 1.25E-11 | 9.20E-11 no |
| LOC100129716 | 0.252482778  | 6.888928326  | 1.26E-11 | 9.29E-11 no |
| JSRP1        | 0.252435589  | 6.887553148  | 1.27E-11 | 9.37E-11 no |
| OMA1         | 0.252416411  | 6.886994268  | 1.27E-11 | 9.40E-11 no |
| YLPM1        | -0.252321466 | -6.884227602 | 1.30E-11 | 9.57E-11 no |
| RND1         | -0.252316678 | -6.884088082 | 1.30E-11 | 9.57E-11 no |
| LOC728643    | -0.252278841 | -6.882985578 | 1.31E-11 | 9.64E-11 no |
| NKAIN4       | -0.252276895 | -6.882928878 | 1.31E-11 | 9.64E-11 no |
| CHGB         | -0.252274398 | -6.882856134 | 1.31E-11 | 9.64E-11 no |
| ZNF540       | -0.25222796  | -6.881503057 | 1.32E-11 | 9.72E-11 no |
| SNAP91       | -0.25210003  | -6.877775818 | 1.35E-11 | 9.96E-11 no |
| ZC4H2        | -0.252094803 | -6.877623523 | 1.36E-11 | 9.97E-11 no |
| SEMA3C       | 0.25201527   | 6.875306547  | 1.38E-11 | 1.01E-10 no |
| AP3S1        | 0.251963049  | 6.873785311  | 1.39E-11 | 1.02E-10 no |
| MTHFS        | 0.251950008  | 6.873405416  | 1.39E-11 | 1.02E-10 no |
| DUSP10       | 0.251941738  | 6.873164496  | 1.40E-11 | 1.02E-10 no |

|           |              |              |          |          |    |
|-----------|--------------|--------------|----------|----------|----|
| KIAA0664  | -0.251912323 | -6.872307656 | 1.40E-11 | 1.03E-10 | no |
| PID1      | -0.251892054 | -6.87171725  | 1.41E-11 | 1.03E-10 | no |
| VANGL2    | -0.251762883 | -6.867954875 | 1.44E-11 | 1.06E-10 | no |
| KIR2DS4   | 0.251617828  | 6.863730329  | 1.48E-11 | 1.09E-10 | no |
| FBX021    | -0.251572341 | -6.862405664 | 1.50E-11 | 1.10E-10 | no |
| DISP1     | 0.251526497  | 6.861070647  | 1.51E-11 | 1.11E-10 | no |
| ITPKC     | 0.251508312  | 6.86054112   | 1.52E-11 | 1.11E-10 | no |
| F2RL2     | 0.25144899   | 6.858813718  | 1.53E-11 | 1.12E-10 | no |
| TAS2R4    | -0.251408009 | -6.857620448 | 1.55E-11 | 1.13E-10 | no |
| RINL      | 0.251389702  | 6.857087414  | 1.55E-11 | 1.13E-10 | no |
| SNX10     | 0.251352158  | 6.855994268  | 1.56E-11 | 1.14E-10 | no |
| FKBP1A    | 0.251351148  | 6.855964859  | 1.56E-11 | 1.14E-10 | no |
| ADD2      | -0.251293305 | -6.854280733 | 1.58E-11 | 1.15E-10 | no |
| ZNF721    | -0.251290684 | -6.854204442 | 1.58E-11 | 1.15E-10 | no |
| TWSG1     | 0.251283518  | 6.853995812  | 1.58E-11 | 1.16E-10 | no |
| TNFRSF12A | 0.251225963  | 6.852320176  | 1.60E-11 | 1.17E-10 | no |
| SAMD10    | -0.251209448 | -6.85183936  | 1.60E-11 | 1.17E-10 | no |
| TAPT1     | -0.251192716 | -6.851352261 | 1.61E-11 | 1.17E-10 | no |
| ZNF687    | -0.251169997 | -6.85069086  | 1.62E-11 | 1.18E-10 | no |
| TUBB6     | 0.25116528   | 6.850553549  | 1.62E-11 | 1.18E-10 | no |
| BAX       | 0.251163781  | 6.850509892  | 1.62E-11 | 1.18E-10 | no |
| MIB1      | -0.251136731 | -6.849722446 | 1.63E-11 | 1.19E-10 | no |
| CC2D1B    | 0.251136533  | 6.849716681  | 1.63E-11 | 1.19E-10 | no |
| B3GNT1    | -0.251128523 | -6.849483508 | 1.63E-11 | 1.19E-10 | no |
| MOV10     | 0.251101995  | 6.848711271  | 1.64E-11 | 1.19E-10 | no |
| NINJ1     | 0.251090457  | 6.848375391  | 1.64E-11 | 1.19E-10 | no |
| PPM1E     | -0.2510445   | -6.847037623 | 1.66E-11 | 1.20E-10 | no |
| CTNS      | 0.250881961  | 6.842306638  | 1.71E-11 | 1.24E-10 | no |
| LRIG1     | -0.250877904 | -6.842188535 | 1.71E-11 | 1.24E-10 | no |
| MINA      | 0.250819553  | 6.840490302  | 1.73E-11 | 1.26E-10 | no |
| DISP2     | -0.250686767 | -6.836625972 | 1.77E-11 | 1.29E-10 | no |
| OAZ1      | 0.250652546  | 6.835630142  | 1.78E-11 | 1.30E-10 | no |
| PPAP2A    | 0.250605447  | 6.83425961   | 1.80E-11 | 1.31E-10 | no |
| HMG5      | -0.250591109 | -6.833842374 | 1.81E-11 | 1.31E-10 | no |
| COL4A1    | 0.250578965  | 6.833489007  | 1.81E-11 | 1.31E-10 | no |
| NSUN6     | -0.250519531 | -6.831759657 | 1.83E-11 | 1.33E-10 | no |
| CPEB3     | -0.250471675 | -6.830367258 | 1.85E-11 | 1.34E-10 | no |
| IFI35     | 0.250471205  | 6.830353584  | 1.85E-11 | 1.34E-10 | no |
| PPIB      | 0.250430333  | 6.829164418  | 1.86E-11 | 1.35E-10 | no |
| MYT1      | -0.250415608 | -6.828735984 | 1.87E-11 | 1.35E-10 | no |
| ZNF394    | 0.250401563  | 6.828327373  | 1.87E-11 | 1.35E-10 | no |
| KSR1      | -0.250357796 | -6.827054053 | 1.89E-11 | 1.37E-10 | no |
| SETD1A    | -0.250335978 | -6.826419303 | 1.90E-11 | 1.37E-10 | no |
| BLVRB     | 0.250335238  | 6.826397783  | 1.90E-11 | 1.37E-10 | no |
| UNC5A     | -0.25033146  | -6.826287861 | 1.90E-11 | 1.37E-10 | no |
| ZNF785    | -0.250330734 | -6.826266761 | 1.90E-11 | 1.37E-10 | no |
| 5-Mar     | -0.250197606 | -6.822393987 | 1.95E-11 | 1.40E-10 | no |
| LOC283267 | -0.250161918 | -6.821355888 | 1.96E-11 | 1.41E-10 | no |
| SART3     | -0.250078542 | -6.818930714 | 1.99E-11 | 1.44E-10 | no |
| SETD5     | -0.25005495  | -6.81824452  | 2.00E-11 | 1.44E-10 | no |
| C9orf6    | 0.250010544  | 6.816952966  | 2.02E-11 | 1.45E-10 | no |



|              |              |              |          |          |    |
|--------------|--------------|--------------|----------|----------|----|
| TNFSF11      | 0.249996726  | 6.816551079  | 2.02E-11 | 1.46E-10 | no |
| TPST1        | 0.249966023  | 6.8156581    | 2.03E-11 | 1.46E-10 | no |
| KLHL28       | -0.249937378 | -6.81482502  | 2.04E-11 | 1.47E-10 | no |
| TRIM23       | -0.249899324 | -6.813718307 | 2.06E-11 | 1.48E-10 | no |
| SUCLG2       | 0.249847191  | 6.812202219  | 2.08E-11 | 1.50E-10 | no |
| KIF3C        | -0.249807147 | -6.811037728 | 2.10E-11 | 1.51E-10 | no |
| TC2N         | 0.249780578  | 6.810265115  | 2.11E-11 | 1.51E-10 | no |
| CUL7         | 0.249775098  | 6.810105755  | 2.11E-11 | 1.52E-10 | no |
| TMEM26       | 0.249752123  | 6.809437658  | 2.12E-11 | 1.52E-10 | no |
| CSMD1        | -0.249743685 | -6.809192287 | 2.12E-11 | 1.52E-10 | no |
| GBA          | 0.249712516  | 6.80828598   | 2.13E-11 | 1.53E-10 | no |
| RECQL        | 0.249692629  | 6.807707691  | 2.14E-11 | 1.54E-10 | no |
| PCDH15       | -0.249602948 | -6.805100109 | 2.18E-11 | 1.56E-10 | no |
| IDI1         | -0.249597629 | -6.804945468 | 2.18E-11 | 1.56E-10 | no |
| METTL10      | -0.249536902 | -6.803179887 | 2.21E-11 | 1.58E-10 | no |
| PHLPP2       | -0.249533853 | -6.803091229 | 2.21E-11 | 1.58E-10 | no |
| COL8A1       | 0.249485943  | 6.801698345  | 2.23E-11 | 1.60E-10 | no |
| RNFT1        | 0.249480008  | 6.801525801  | 2.23E-11 | 1.60E-10 | no |
| CHERP        | -0.249477347 | -6.801448432 | 2.23E-11 | 1.60E-10 | no |
| LIMK2        | 0.249347121  | 6.797662686  | 2.29E-11 | 1.64E-10 | no |
| SMARCA4      | -0.249339238 | -6.797433517 | 2.29E-11 | 1.64E-10 | no |
| C13orf31     | 0.24924001   | 6.794549188  | 2.33E-11 | 1.67E-10 | no |
| FAM176A      | 0.249213926  | 6.793791005  | 2.34E-11 | 1.68E-10 | no |
| BEND7        | -0.249158506 | -6.792180195 | 2.37E-11 | 1.69E-10 | no |
| EXOC3L2      | 0.249085582  | 6.790060746  | 2.40E-11 | 1.72E-10 | no |
| DKFZP434H168 | -0.249083486 | -6.789999824 | 2.40E-11 | 1.72E-10 | no |
| SNX15        | -0.249082301 | -6.789965376 | 2.40E-11 | 1.72E-10 | no |
| SPAG9        | -0.249070437 | -6.789620588 | 2.41E-11 | 1.72E-10 | no |
| EEF2         | -0.249004047 | -6.787691153 | 2.44E-11 | 1.74E-10 | no |
| CMTM4        | -0.248880914 | -6.784112945 | 2.50E-11 | 1.78E-10 | no |
| DUSP22       | 0.248755454  | 6.78046746   | 2.56E-11 | 1.82E-10 | no |
| LOC642852    | -0.24874338  | -6.780116625 | 2.56E-11 | 1.83E-10 | no |
| USP22        | -0.248726057 | -6.779613305 | 2.57E-11 | 1.83E-10 | no |
| ARNTL2       | 0.248623677  | 6.776638812  | 2.62E-11 | 1.87E-10 | no |
| FAM134A      | -0.248583501 | -6.77547161  | 2.64E-11 | 1.88E-10 | no |
| HLCS         | 0.248542537  | 6.774281552  | 2.66E-11 | 1.89E-10 | no |
| ANKHD1-EIF4E | 0.248501713  | 6.773095627  | 2.68E-11 | 1.91E-10 | no |
| PRSSL1       | 0.248501641  | 6.773093541  | 2.68E-11 | 1.91E-10 | no |
| CORO1B       | 0.248452615  | 6.771669377  | 2.71E-11 | 1.92E-10 | no |
| TSNARE1      | -0.248441217 | -6.771338286 | 2.71E-11 | 1.93E-10 | no |
| FAM155A      | -0.248422767 | -6.770802343 | 2.72E-11 | 1.93E-10 | no |
| TAX1BP3      | 0.248402816  | 6.770222823  | 2.73E-11 | 1.94E-10 | no |
| TSC1         | -0.248386789 | -6.769757283 | 2.74E-11 | 1.95E-10 | no |
| TEF          | -0.248378885 | -6.769527679 | 2.74E-11 | 1.95E-10 | no |
| KCNE4        | 0.248375986  | 6.769443474  | 2.75E-11 | 1.95E-10 | no |
| RAC3         | -0.248359468 | -6.768963694 | 2.75E-11 | 1.95E-10 | no |
| KLHL22       | -0.248264055 | -6.766192409 | 2.80E-11 | 1.99E-10 | no |
| YAP1         | 0.248261601  | 6.766121123  | 2.81E-11 | 1.99E-10 | no |
| NUFIP1       | -0.24826123  | -6.766110336 | 2.81E-11 | 1.99E-10 | no |
| DGCR9        | -0.248234393 | -6.76533091  | 2.82E-11 | 2.00E-10 | no |
| TD02         | 0.248226098  | 6.765089971  | 2.82E-11 | 2.00E-10 | no |

|           |              |              |          |             |
|-----------|--------------|--------------|----------|-------------|
| CRB2      | 0.248144675  | 6.762725283  | 2.87E-11 | 2.03E-10 no |
| BMP2      | -0.248097838 | -6.76136509  | 2.89E-11 | 2.05E-10 no |
| C2orf65   | 0.248093205  | 6.761230531  | 2.90E-11 | 2.05E-10 no |
| TM2D2     | 0.248033281  | 6.759490371  | 2.93E-11 | 2.07E-10 no |
| LRRC32    | 0.248023036  | 6.759192882  | 2.93E-11 | 2.07E-10 no |
| C12orf34  | -0.24800724  | -6.75873417  | 2.94E-11 | 2.08E-10 no |
| LPP       | 0.247971184  | 6.757687208  | 2.96E-11 | 2.09E-10 no |
| HPGDS     | 0.247958437  | 6.757317061  | 2.97E-11 | 2.10E-10 no |
| VDAC2     | -0.247879484 | -6.755024551 | 3.01E-11 | 2.13E-10 no |
| C17orf62  | 0.247837662  | 6.753810278  | 3.04E-11 | 2.14E-10 no |
| TTC39A    | 0.247808495  | 6.752963438  | 3.06E-11 | 2.16E-10 no |
| C6orf211  | 0.247791419  | 6.752467669  | 3.06E-11 | 2.16E-10 no |
| NET1      | -0.247741144 | -6.751008032 | 3.09E-11 | 2.18E-10 no |
| MAPK12    | -0.247705654 | -6.7499777   | 3.11E-11 | 2.19E-10 no |
| OPA3      | 0.247705255  | 6.749966117  | 3.12E-11 | 2.19E-10 no |
| LUZP2     | -0.247690332 | -6.749532882 | 3.12E-11 | 2.20E-10 no |
| FAIM2     | -0.247624068 | -6.747609244 | 3.16E-11 | 2.23E-10 no |
| FZD5      | 0.24758509   | 6.746477737  | 3.19E-11 | 2.24E-10 no |
| USP7      | -0.24756628  | -6.745931713 | 3.20E-11 | 2.25E-10 no |
| CASK      | -0.247537107 | -6.745084904 | 3.21E-11 | 2.26E-10 no |
| LTA4H     | 0.24752038   | 6.744599346  | 3.23E-11 | 2.27E-10 no |
| PRKCDBP   | 0.247507843  | 6.744235436  | 3.23E-11 | 2.27E-10 no |
| CTCF      | -0.247491325 | -6.743755973 | 3.24E-11 | 2.28E-10 no |
| GHRL      | 0.247438262  | 6.742215792  | 3.28E-11 | 2.30E-10 no |
| MAPK10    | -0.24739383  | -6.740926176 | 3.30E-11 | 2.32E-10 no |
| CHIT1     | 0.247331413  | 6.739114613  | 3.34E-11 | 2.34E-10 no |
| ZDHHC17   | -0.247330874 | -6.739098972 | 3.34E-11 | 2.34E-10 no |
| RICTOR    | -0.247326597 | -6.738974831 | 3.34E-11 | 2.35E-10 no |
| AASDHPPT  | -0.24721232  | -6.735658366 | 3.42E-11 | 2.40E-10 no |
| CCDC28A   | 0.247179293  | 6.734699945  | 3.44E-11 | 2.41E-10 no |
| LOC283050 | 0.24715323   | 6.733943607  | 3.45E-11 | 2.42E-10 no |
| NF1       | -0.247101835 | -6.732452235 | 3.49E-11 | 2.44E-10 no |
| GPBP1     | -0.247080727 | -6.731839748 | 3.50E-11 | 2.45E-10 no |
| HNRNPA1   | -0.247069582 | -6.731516344 | 3.51E-11 | 2.46E-10 no |
| SOD3      | 0.247040553  | 6.730674035  | 3.53E-11 | 2.47E-10 no |
| GNG5      | 0.247009596  | 6.729775789  | 3.55E-11 | 2.48E-10 no |
| TNIP1     | 0.246962573  | 6.728411443  | 3.58E-11 | 2.50E-10 no |
| WFIKN1    | -0.24680842  | -6.723939069 | 3.69E-11 | 2.58E-10 no |
| MMP2      | 0.246754435  | 6.722372965  | 3.72E-11 | 2.60E-10 no |
| PLIN2     | 0.246751046  | 6.722274642  | 3.72E-11 | 2.60E-10 no |
| ZNF737    | -0.246711067 | -6.721114896 | 3.75E-11 | 2.62E-10 no |
| MUL1      | 0.246678827  | 6.720179676  | 3.78E-11 | 2.63E-10 no |
| RMND5B    | -0.246642705 | -6.719131884 | 3.80E-11 | 2.65E-10 no |
| ZNF34     | -0.246596925 | -6.717803963 | 3.83E-11 | 2.67E-10 no |
| WNT3      | -0.246593588 | -6.717707161 | 3.84E-11 | 2.67E-10 no |
| RBM4B     | -0.246555569 | -6.716604403 | 3.86E-11 | 2.69E-10 no |
| RAB39B    | -0.246553911 | -6.716556326 | 3.86E-11 | 2.69E-10 no |
| PDGFB     | 0.246513447  | 6.715382672  | 3.89E-11 | 2.71E-10 no |
| CHMP4C    | 0.24650583   | 6.715161762  | 3.90E-11 | 2.72E-10 no |
| GLIS2     | -0.246485333 | -6.714567289 | 3.91E-11 | 2.72E-10 no |
| KIAA1549  | -0.246460711 | -6.71385315  | 3.93E-11 | 2.74E-10 no |

|          |              |              |          |          |    |
|----------|--------------|--------------|----------|----------|----|
| RNF125   | 0.246372825  | 6.711304325  | 4.00E-11 | 2.78E-10 | no |
| SEMA3A   | 0.24637141   | 6.711263284  | 4.00E-11 | 2.78E-10 | no |
| SLC15A4  | 0.246365197  | 6.711083106  | 4.00E-11 | 2.78E-10 | no |
| PCBP4    | -0.246334306 | -6.710187253 | 4.03E-11 | 2.80E-10 | no |
| C7orf51  | -0.246325257 | -6.709924818 | 4.03E-11 | 2.80E-10 | no |
| INA      | -0.246300575 | -6.709209068 | 4.05E-11 | 2.81E-10 | no |
| CLNS1A   | -0.246282029 | -6.708671264 | 4.07E-11 | 2.82E-10 | no |
| PPT1     | 0.246179113  | 6.705686929  | 4.14E-11 | 2.88E-10 | no |
| GSN      | 0.246175665  | 6.705586961  | 4.15E-11 | 2.88E-10 | no |
| SLC36A1  | 0.246175517  | 6.705582662  | 4.15E-11 | 2.88E-10 | no |
| NAALADL2 | 0.246172701  | 6.705501025  | 4.15E-11 | 2.88E-10 | no |
| MMP19    | 0.246031804  | 6.701415756  | 4.26E-11 | 2.95E-10 | no |
| TAF12    | 0.246030408  | 6.701375293  | 4.26E-11 | 2.95E-10 | no |
| PTPN23   | -0.246028049 | -6.701306909 | 4.26E-11 | 2.95E-10 | no |
| UNC13A   | -0.24600893  | -6.700752574 | 4.28E-11 | 2.96E-10 | no |
| DVL1     | -0.245971344 | -6.699662899 | 4.31E-11 | 2.98E-10 | no |
| NOTCH1   | -0.245958214 | -6.69928222  | 4.32E-11 | 2.99E-10 | no |
| LRRTM3   | -0.245948691 | -6.699006136 | 4.33E-11 | 2.99E-10 | no |
| ZMIZ1    | -0.245894115 | -6.697423964 | 4.37E-11 | 3.02E-10 | no |
| ASRGL1   | -0.24589049  | -6.697318873 | 4.37E-11 | 3.02E-10 | no |
| MARCKS   | -0.245813246 | -6.69507967  | 4.44E-11 | 3.07E-10 | no |
| MTCP1    | 0.245791442  | 6.694447598  | 4.46E-11 | 3.08E-10 | no |
| KCNK4    | -0.245739146 | -6.692931699 | 4.50E-11 | 3.11E-10 | no |
| TMCC2    | -0.24571964  | -6.692366298 | 4.52E-11 | 3.12E-10 | no |
| STYX     | 0.245668469  | 6.690883088  | 4.56E-11 | 3.14E-10 | no |
| DNAJC21  | 0.245652936  | 6.690432873  | 4.57E-11 | 3.15E-10 | no |
| LAMB2    | 0.245640048  | 6.690059326  | 4.58E-11 | 3.16E-10 | no |
| GPR55    | 0.245617538  | 6.689406916  | 4.60E-11 | 3.17E-10 | no |
| LRRC1    | -0.245614487 | -6.689318486 | 4.60E-11 | 3.17E-10 | no |
| FAM126A  | 0.245597983  | 6.688840143  | 4.62E-11 | 3.18E-10 | no |
| KIF1B    | -0.245579987 | -6.688318561 | 4.63E-11 | 3.19E-10 | no |
| OSBPL2   | -0.245503255 | -6.68609471  | 4.70E-11 | 3.24E-10 | no |
| NPRL3    | -0.245497428 | -6.685925852 | 4.71E-11 | 3.24E-10 | no |
| PCSK5    | 0.245495196  | 6.685861168  | 4.71E-11 | 3.24E-10 | no |
| MTMR11   | 0.245476262  | 6.685312443  | 4.72E-11 | 3.25E-10 | no |
| GALC     | 0.245463374  | 6.684938954  | 4.74E-11 | 3.25E-10 | no |
| SLC25A37 | 0.245431587  | 6.684017776  | 4.76E-11 | 3.27E-10 | no |
| ABCA3    | -0.245419975 | -6.683681268 | 4.77E-11 | 3.28E-10 | no |
| SMARCB1  | -0.245401785 | -6.68315414  | 4.79E-11 | 3.29E-10 | no |
| WTAP     | 0.2453544    | 6.681781021  | 4.83E-11 | 3.32E-10 | no |
| HRH2     | 0.245340415  | 6.681375765  | 4.85E-11 | 3.32E-10 | no |
| PMEDA1   | 0.245330203  | 6.681079835  | 4.85E-11 | 3.33E-10 | no |
| DMRTC1B  | -0.245323186 | -6.680876512 | 4.86E-11 | 3.33E-10 | no |
| SHC2     | -0.245185407 | -6.676884325 | 4.99E-11 | 3.42E-10 | no |
| FLNC     | 0.24517293   | 6.67652283   | 5.00E-11 | 3.42E-10 | no |
| CAND2    | -0.245166253 | -6.67632935  | 5.00E-11 | 3.43E-10 | no |
| RAP2A    | -0.245165207 | -6.676299071 | 5.01E-11 | 3.43E-10 | no |
| CLINT1   | 0.245144738  | 6.67570602   | 5.02E-11 | 3.44E-10 | no |
| DUSP18   | 0.245091686  | 6.674168969  | 5.07E-11 | 3.47E-10 | no |
| CHD3     | -0.245040883 | -6.672697145 | 5.12E-11 | 3.50E-10 | no |
| MCL1     | 0.244799404  | 6.665702058  | 5.36E-11 | 3.66E-10 | no |

|           |              |              |          |          |    |
|-----------|--------------|--------------|----------|----------|----|
| CHST14    | 0.244777039  | 6.665054246  | 5.38E-11 | 3.68E-10 | no |
| MAOB      | 0.244744756  | 6.664119204  | 5.41E-11 | 3.70E-10 | no |
| RNF146    | -0.244687737 | -6.662467765 | 5.47E-11 | 3.74E-10 | no |
| RUFY2     | -0.24465144  | -6.661416508 | 5.51E-11 | 3.76E-10 | no |
| C10orf41  | 0.244602259  | 6.659992181  | 5.56E-11 | 3.79E-10 | no |
| CAMLG     | -0.244545375 | -6.658344833 | 5.62E-11 | 3.83E-10 | no |
| FGF12     | -0.244536822 | -6.658097138 | 5.62E-11 | 3.84E-10 | no |
| NMNAT2    | -0.244524273 | -6.65773373  | 5.64E-11 | 3.84E-10 | no |
| RDH10     | 0.244479853  | 6.656447418  | 5.68E-11 | 3.87E-10 | no |
| ZNF681    | -0.244414543 | -6.654556218 | 5.75E-11 | 3.92E-10 | no |
| SCRT1     | -0.244395066 | -6.653992227 | 5.77E-11 | 3.93E-10 | no |
| LOC400804 | 0.244386321  | 6.653739028  | 5.78E-11 | 3.94E-10 | no |
| HEATR7B2  | 0.244351743  | 6.652737811  | 5.82E-11 | 3.96E-10 | no |
| CACNG2    | -0.244275298 | -6.650524419 | 5.90E-11 | 4.02E-10 | no |
| PPP2R2B   | -0.244266579 | -6.650271967 | 5.91E-11 | 4.02E-10 | no |
| NAA30     | -0.244256003 | -6.649965757 | 5.92E-11 | 4.03E-10 | no |
| FERMT1    | -0.244227097 | -6.649128876 | 5.96E-11 | 4.05E-10 | no |
| ACBD5     | -0.244124228 | -6.646150727 | 6.07E-11 | 4.13E-10 | no |
| LTBP1     | 0.244121052  | 6.646058758  | 6.07E-11 | 4.13E-10 | no |
| TCTN2     | 0.244103642  | 6.645554755  | 6.09E-11 | 4.14E-10 | no |
| KCNJ15    | 0.244085283  | 6.645023275  | 6.11E-11 | 4.15E-10 | no |
| UNC80     | -0.244057976 | -6.644232792 | 6.15E-11 | 4.17E-10 | no |
| NIPSNAP3A | 0.244024627  | 6.643267412  | 6.18E-11 | 4.19E-10 | no |
| MBTD1     | -0.244024259 | -6.643256748 | 6.18E-11 | 4.19E-10 | no |
| RAB7L1    | 0.2439701    | 6.641689021  | 6.25E-11 | 4.23E-10 | no |
| FAM171A1  | -0.243960641 | -6.641415203 | 6.26E-11 | 4.24E-10 | no |
| TMEM159   | 0.243949251  | 6.641085508  | 6.27E-11 | 4.25E-10 | no |
| SEMA6B    | -0.243935829 | -6.640696995 | 6.29E-11 | 4.26E-10 | no |
| LOC201651 | 0.243920823  | 6.64026264   | 6.30E-11 | 4.27E-10 | no |
| TTC12     | 0.243841772  | 6.637974591  | 6.40E-11 | 4.33E-10 | no |
| FOSL1     | 0.243829108  | 6.63760804   | 6.41E-11 | 4.34E-10 | no |
| TMEM123   | 0.243823131  | 6.637435059  | 6.42E-11 | 4.34E-10 | no |
| RAB1A     | 0.243803684  | 6.636872199  | 6.44E-11 | 4.36E-10 | no |
| SECISBP2  | -0.243800801 | -6.63678875  | 6.44E-11 | 4.36E-10 | no |
| NRIP1     | 0.243781765  | 6.636237824  | 6.47E-11 | 4.37E-10 | no |
| LOC144571 | 0.243730879  | 6.634765102  | 6.53E-11 | 4.41E-10 | no |
| ZNF445    | -0.243711215 | -6.634196009 | 6.55E-11 | 4.42E-10 | no |
| SPHKAP    | -0.243651122 | -6.632456925 | 6.62E-11 | 4.47E-10 | no |
| PSMD5     | 0.243481071  | 6.627536132  | 6.84E-11 | 4.61E-10 | no |
| TBK1      | 0.243479092  | 6.627478859  | 6.84E-11 | 4.61E-10 | no |
| LNP1      | -0.243473139 | -6.627306606 | 6.85E-11 | 4.62E-10 | no |
| SURF6     | -0.243472406 | -6.627285403 | 6.85E-11 | 4.62E-10 | no |
| CSDA      | 0.243469638  | 6.627205303  | 6.85E-11 | 4.62E-10 | no |
| IDH1      | 0.243469003  | 6.627186922  | 6.85E-11 | 4.62E-10 | no |
| SLC25A41  | -0.243406452 | -6.625377059 | 6.93E-11 | 4.67E-10 | no |
| HSPBAP1   | 0.243380542  | 6.624627409  | 6.96E-11 | 4.69E-10 | no |
| C9orf125  | -0.243367301 | -6.624244314 | 6.98E-11 | 4.70E-10 | no |
| HIAT1     | 0.243350818  | 6.623767413  | 7.00E-11 | 4.71E-10 | no |
| PIGG      | 0.24334412   | 6.623573626  | 7.01E-11 | 4.72E-10 | no |
| MMS19     | -0.24332573  | -6.62304155  | 7.03E-11 | 4.73E-10 | no |
| ZNF276    | -0.243260703 | -6.621160265 | 7.12E-11 | 4.79E-10 | no |

|              |              |              |          |          |    |
|--------------|--------------|--------------|----------|----------|----|
| RFX5         | 0.243213685  | 6.619800047  | 7.18E-11 | 4.83E-10 | no |
| FBXO11       | -0.243141672 | -6.617716809 | 7.28E-11 | 4.89E-10 | no |
| LPPR1        | -0.243090616 | -6.616239892 | 7.35E-11 | 4.93E-10 | no |
| UCK1         | -0.243062835 | -6.615436296 | 7.38E-11 | 4.96E-10 | no |
| PLA2R1       | 0.243024047  | 6.614314352  | 7.44E-11 | 4.99E-10 | no |
| SYPL1        | 0.243015319  | 6.614061875  | 7.45E-11 | 5.00E-10 | no |
| MAGED4B      | -0.242995839 | -6.613498449 | 7.47E-11 | 5.01E-10 | no |
| DENND5A      | -0.242935277 | -6.61174675  | 7.56E-11 | 5.07E-10 | no |
| SF1          | -0.242922278 | -6.611370783 | 7.58E-11 | 5.08E-10 | no |
| CHSY3        | 0.242864138  | 6.609689266  | 7.66E-11 | 5.13E-10 | no |
| INSRR        | 0.242852283  | 6.609346397  | 7.67E-11 | 5.14E-10 | no |
| AKR1A1       | 0.242842472  | 6.609062643  | 7.69E-11 | 5.15E-10 | no |
| TOMM20       | -0.242806012 | -6.608008208 | 7.74E-11 | 5.18E-10 | no |
| PALMD        | 0.242796101  | 6.607721593  | 7.75E-11 | 5.19E-10 | no |
| SERPINF2     | 0.242654522  | 6.603627344  | 7.96E-11 | 5.32E-10 | no |
| ZDHHC24      | 0.242612378  | 6.602408693  | 8.02E-11 | 5.36E-10 | no |
| P4HA2        | 0.242582178  | 6.60153544   | 8.07E-11 | 5.39E-10 | no |
| ADO          | -0.242575296 | -6.601336453 | 8.08E-11 | 5.40E-10 | no |
| LOC145820    | 0.242569308  | 6.601163321  | 8.08E-11 | 5.40E-10 | no |
| LIPN         | 0.242467915  | 6.59823166   | 8.24E-11 | 5.50E-10 | no |
| RTF1         | -0.242429187 | -6.597111957 | 8.29E-11 | 5.54E-10 | no |
| PIK3R1       | -0.242427604 | -6.597066193 | 8.30E-11 | 5.54E-10 | no |
| SYT11        | -0.242415619 | -6.596719688 | 8.32E-11 | 5.55E-10 | no |
| FLYWCH1      | -0.242368267 | -6.595350688 | 8.39E-11 | 5.59E-10 | no |
| DARS2        | 0.242351938  | 6.594878618  | 8.41E-11 | 5.61E-10 | no |
| IL23A        | 0.242297375  | 6.593301228  | 8.50E-11 | 5.66E-10 | no |
| CLEC12B      | 0.242231733  | 6.591403644  | 8.60E-11 | 5.73E-10 | no |
| TET1         | -0.242221306 | -6.591102241 | 8.62E-11 | 5.74E-10 | no |
| C10orf75     | -0.242201428 | -6.590527627 | 8.65E-11 | 5.76E-10 | no |
| SCYL2        | 0.242177105  | 6.589824536  | 8.69E-11 | 5.78E-10 | no |
| COMMD8       | 0.24216407   | 6.589447752  | 8.71E-11 | 5.79E-10 | no |
| RAMP3        | 0.242159108  | 6.589304317  | 8.72E-11 | 5.80E-10 | no |
| ATXN7L3B     | -0.242156452 | -6.589227558 | 8.72E-11 | 5.80E-10 | no |
| SNX24        | 0.242106867  | 6.587794299  | 8.80E-11 | 5.85E-10 | no |
| KSR2         | -0.242034253 | -6.585695462 | 8.92E-11 | 5.92E-10 | no |
| VPS72        | -0.242031876 | -6.585626757 | 8.92E-11 | 5.93E-10 | no |
| WNT4         | 0.241983115  | 6.58421746   | 9.00E-11 | 5.98E-10 | no |
| CAT          | 0.241982295  | 6.584193764  | 9.00E-11 | 5.98E-10 | no |
| NMT2         | -0.241964279 | -6.583673072 | 9.03E-11 | 5.99E-10 | no |
| TREML4       | 0.241922019  | 6.582451735  | 9.10E-11 | 6.04E-10 | no |
| HIP1R        | -0.241918604 | -6.582353024 | 9.11E-11 | 6.04E-10 | no |
| GPR124       | 0.241911281  | 6.582141381  | 9.12E-11 | 6.05E-10 | no |
| BCCIP        | -0.24187897  | -6.581207602 | 9.17E-11 | 6.08E-10 | no |
| NUB1         | 0.241864347  | 6.58078503   | 9.20E-11 | 6.09E-10 | no |
| ADAMTSL1     | 0.241804283  | 6.579049266  | 9.30E-11 | 6.16E-10 | no |
| VPS53        | -0.241788512 | -6.578593504 | 9.33E-11 | 6.18E-10 | no |
| CTBP2        | -0.241704746 | -6.576172973 | 9.47E-11 | 6.27E-10 | no |
| PHF16        | -0.241696275 | -6.575928205 | 9.49E-11 | 6.28E-10 | no |
| LOC100129034 | 0.24167907   | 6.57543105   | 9.52E-11 | 6.29E-10 | no |
| PIK3CD       | 0.241624842  | 6.573864163  | 9.61E-11 | 6.35E-10 | no |
| ATMIN        | -0.241617747 | -6.573659156 | 9.62E-11 | 6.36E-10 | no |

|           |              |              |          |          |    |
|-----------|--------------|--------------|----------|----------|----|
| H2AFY2    | -0.241612751 | -6.573514806 | 9.63E-11 | 6.36E-10 | no |
| LOC388152 | -0.241542346 | -6.571480609 | 9.76E-11 | 6.44E-10 | no |
| NRSN1     | -0.241542252 | -6.5714779   | 9.76E-11 | 6.44E-10 | no |
| CRTAP     | 0.241533058  | 6.571212277  | 9.77E-11 | 6.45E-10 | no |
| CLEC5A    | 0.241470525  | 6.569405641  | 9.89E-11 | 6.52E-10 | no |
| CXorf38   | 0.241350053  | 6.565925296  | 1.01E-10 | 6.67E-10 | no |
| FBX022    | 0.241322622  | 6.565132895  | 1.02E-10 | 6.70E-10 | no |
| AP1S2     | 0.24128262   | 6.563977374  | 1.02E-10 | 6.74E-10 | no |
| KLRC3     | -0.241265318 | -6.563477589 | 1.03E-10 | 6.76E-10 | no |
| C12orf5   | 0.241221228  | 6.562204045  | 1.03E-10 | 6.82E-10 | no |
| STK40     | 0.241212847  | 6.561961948  | 1.04E-10 | 6.82E-10 | no |
| TCF12     | -0.241211346 | -6.56191859  | 1.04E-10 | 6.82E-10 | no |
| LOC399744 | -0.241189873 | -6.561298352 | 1.04E-10 | 6.85E-10 | no |
| EMP1      | 0.241146676  | 6.560050676  | 1.05E-10 | 6.90E-10 | no |
| KLRF1     | 0.241105825  | 6.558870783  | 1.06E-10 | 6.95E-10 | no |
| CCDC88B   | 0.240979115  | 6.555211295  | 1.08E-10 | 7.11E-10 | no |
| FKBP10    | 0.240896218  | 6.552817345  | 1.10E-10 | 7.21E-10 | no |
| TSHZ3     | 0.240895566  | 6.552798525  | 1.10E-10 | 7.21E-10 | no |
| DUSP1     | 0.240863712  | 6.55187867   | 1.10E-10 | 7.25E-10 | no |
| LAG3      | 0.240859101  | 6.551745504  | 1.11E-10 | 7.26E-10 | no |
| NCSTN     | 0.240835688  | 6.551069431  | 1.11E-10 | 7.29E-10 | no |
| KIAA1409  | -0.240815052 | -6.550473538 | 1.11E-10 | 7.31E-10 | no |
| B3GALT2   | -0.240805455 | -6.55019641  | 1.12E-10 | 7.32E-10 | no |
| CCDC102A  | 0.240786534  | 6.549650079  | 1.12E-10 | 7.34E-10 | no |
| KATNB1    | -0.240760086 | -6.548886381 | 1.13E-10 | 7.38E-10 | no |
| ZFP41     | -0.240704863 | -6.547291886 | 1.14E-10 | 7.45E-10 | no |
| CECR2     | -0.240658887 | -6.54596441  | 1.15E-10 | 7.51E-10 | no |
| DLL3      | -0.240638513 | -6.545376189 | 1.15E-10 | 7.54E-10 | no |
| ELTD1     | 0.24063088   | 6.545155793  | 1.15E-10 | 7.54E-10 | no |
| CIZ1      | -0.240593666 | -6.544081371 | 1.16E-10 | 7.59E-10 | no |
| RASL10A   | -0.240592901 | -6.544059298 | 1.16E-10 | 7.59E-10 | no |
| TLK2      | -0.24055858  | -6.543068434 | 1.17E-10 | 7.64E-10 | no |
| GPR133    | 0.240557272  | 6.543030672  | 1.17E-10 | 7.64E-10 | no |
| MYBPC2    | 0.240508999  | 6.54163704   | 1.18E-10 | 7.70E-10 | no |
| C2orf27A  | -0.240507609 | -6.541596906 | 1.18E-10 | 7.70E-10 | no |
| BDKRB1    | 0.24045321   | 6.5400265    | 1.19E-10 | 7.77E-10 | no |
| MICALL2   | 0.240413526  | 6.538880921  | 1.20E-10 | 7.83E-10 | no |
| KCTD10    | 0.240397668  | 6.53842317   | 1.20E-10 | 7.85E-10 | no |
| RAI14     | 0.240396894  | 6.538400805  | 1.20E-10 | 7.85E-10 | no |
| ENHO      | -0.240386879 | -6.538111707 | 1.20E-10 | 7.86E-10 | no |
| TRPC1     | -0.240371431 | -6.537665803 | 1.21E-10 | 7.88E-10 | no |
| FAM86D    | 0.24035107   | 6.537078047  | 1.21E-10 | 7.90E-10 | no |
| ZNF775    | -0.240342847 | -6.536840691 | 1.21E-10 | 7.91E-10 | no |
| NISCH     | -0.24026709  | -6.534654019 | 1.23E-10 | 8.02E-10 | no |
| RNF133    | 0.240241424  | 6.533913185  | 1.24E-10 | 8.06E-10 | no |
| GTF2F1    | -0.240185996 | -6.532313393 | 1.25E-10 | 8.13E-10 | no |
| DDX58     | 0.240163375  | 6.531660531  | 1.25E-10 | 8.17E-10 | no |
| EDARADD   | 0.240156134  | 6.531451534  | 1.26E-10 | 8.17E-10 | no |
| HIST1H2AC | 0.240146185  | 6.531164395  | 1.26E-10 | 8.19E-10 | no |
| BAT2      | -0.24013891  | -6.530954435 | 1.26E-10 | 8.19E-10 | no |
| MFI2      | 0.240067909  | 6.528905349  | 1.28E-10 | 8.30E-10 | no |

|           |              |              |          |          |    |
|-----------|--------------|--------------|----------|----------|----|
| FADS1     | -0.240050837 | -6.528412647 | 1.28E-10 | 8.32E-10 | no |
| MMP1      | 0.24002297   | 6.527608468  | 1.29E-10 | 8.36E-10 | no |
| DZIP1L    | 0.239981788  | 6.526420036  | 1.30E-10 | 8.42E-10 | no |
| DNAJC25   | 0.239979409  | 6.526351375  | 1.30E-10 | 8.42E-10 | no |
| GNAL      | -0.239960551 | -6.525807176 | 1.30E-10 | 8.45E-10 | no |
| PARD6A    | -0.239940778 | -6.525236619 | 1.31E-10 | 8.47E-10 | no |
| DPH1      | -0.239847533 | -6.522545963 | 1.33E-10 | 8.62E-10 | no |
| PTPRA     | -0.239778592 | -6.520556763 | 1.35E-10 | 8.72E-10 | no |
| PHGDH     | -0.239758356 | -6.519972916 | 1.35E-10 | 8.75E-10 | no |
| GPR152    | 0.239687893  | 6.517939942  | 1.37E-10 | 8.86E-10 | no |
| DPH3      | 0.239664651  | 6.517269373  | 1.37E-10 | 8.89E-10 | no |
| MPRIP     | -0.239664555 | -6.517266614 | 1.37E-10 | 8.89E-10 | no |
| TBC1D24   | -0.239660087 | -6.517137717 | 1.37E-10 | 8.90E-10 | no |
| GPR109A   | 0.239659328  | 6.517115806  | 1.37E-10 | 8.90E-10 | no |
| DNPEP     | 0.239590693  | 6.515135716  | 1.39E-10 | 9.00E-10 | no |
| LAIR2     | 0.239565239  | 6.514401416  | 1.40E-10 | 9.04E-10 | no |
| DHH       | 0.239486858  | 6.512140322  | 1.42E-10 | 9.17E-10 | no |
| CLASP1    | -0.239483743 | -6.512050485 | 1.42E-10 | 9.17E-10 | no |
| PRDM11    | -0.239424646 | -6.510345783 | 1.43E-10 | 9.27E-10 | no |
| ENPEP     | 0.239393764  | 6.509454993  | 1.44E-10 | 9.32E-10 | no |
| ZNF506    | -0.239391826 | -6.509399095 | 1.44E-10 | 9.32E-10 | no |
| C21orf63  | 0.23936258   | 6.508555508  | 1.45E-10 | 9.36E-10 | no |
| LOC653653 | 0.23935391   | 6.508305429  | 1.45E-10 | 9.37E-10 | no |
| OPN3      | 0.239346827  | 6.508101128  | 1.45E-10 | 9.38E-10 | no |
| S100A12   | 0.239309194  | 6.507015684  | 1.46E-10 | 9.44E-10 | no |
| CKB       | -0.239290313 | -6.506471117 | 1.47E-10 | 9.47E-10 | no |
| FYN       | -0.239130432 | -6.501860075 | 1.51E-10 | 9.75E-10 | no |
| GFPT2     | 0.239102803  | 6.501063291  | 1.52E-10 | 9.79E-10 | no |
| TACC2     | -0.239099992 | -6.500982225 | 1.52E-10 | 9.80E-10 | no |
| UNKL      | -0.239058687 | -6.499791093 | 1.53E-10 | 9.87E-10 | no |
| GRAP      | 0.239055467  | 6.499698233  | 1.53E-10 | 9.87E-10 | no |
| NUAK2     | 0.239009869  | 6.498383359  | 1.55E-10 | 9.95E-10 | no |
| ANKRD26   | -0.238963236 | -6.497038656 | 1.56E-10 | 1.00E-09 | no |
| CHRNA4    | -0.238951169 | -6.496690717 | 1.56E-10 | 1.00E-09 | no |
| DEDD2     | 0.23885478   | 6.493911459  | 1.59E-10 | 1.02E-09 | no |
| LOC147727 | -0.238812842 | -6.492702297 | 1.60E-10 | 1.03E-09 | no |
| AAMP      | -0.238810201 | -6.492626143 | 1.60E-10 | 1.03E-09 | no |
| MCF2L2    | -0.23866217  | -6.488358422 | 1.65E-10 | 1.06E-09 | no |
| PDHA1     | -0.238603701 | -6.486672873 | 1.66E-10 | 1.07E-09 | no |
| ERGIC1    | 0.238560432  | 6.485425576  | 1.68E-10 | 1.08E-09 | no |
| PPFIA3    | -0.238546983 | -6.485037898 | 1.68E-10 | 1.08E-09 | no |
| MEIS3P1   | 0.238543454  | 6.484936164  | 1.68E-10 | 1.08E-09 | no |
| ALPK3     | 0.238454159  | 6.482362263  | 1.71E-10 | 1.10E-09 | no |
| DMC1      | 0.238361904  | 6.479703216  | 1.74E-10 | 1.11E-09 | no |
| SDC1      | 0.238357611  | 6.479579478  | 1.74E-10 | 1.11E-09 | no |
| IQCG      | 0.238264874  | 6.476906735  | 1.77E-10 | 1.13E-09 | no |
| ACTN4     | 0.238187969  | 6.474690403  | 1.79E-10 | 1.15E-09 | no |
| FSTL3     | 0.238117087  | 6.472647784  | 1.82E-10 | 1.16E-09 | no |
| GTF2E1    | 0.238116913  | 6.472642777  | 1.82E-10 | 1.16E-09 | no |
| TMEM188   | 0.238116666  | 6.472635658  | 1.82E-10 | 1.16E-09 | no |
| LOC92249  | -0.23809435  | -6.471992574 | 1.82E-10 | 1.17E-09 | no |

|          |              |              |          |          |    |
|----------|--------------|--------------|----------|----------|----|
| CTTNBP2  | -0.23806933  | -6.471271597 | 1.83E-10 | 1.17E-09 | no |
| THBS3    | 0.238049874  | 6.470710977  | 1.84E-10 | 1.17E-09 | no |
| UBTF     | -0.238048182 | -6.470662226 | 1.84E-10 | 1.17E-09 | no |
| TSSC1    | -0.238026801 | -6.47004613  | 1.85E-10 | 1.18E-09 | no |
| SLC6A1   | -0.237982773 | -6.468777507 | 1.86E-10 | 1.19E-09 | no |
| IGF1     | 0.237976906  | 6.46860847   | 1.86E-10 | 1.19E-09 | no |
| REPS2    | -0.237969967 | -6.468408534 | 1.86E-10 | 1.19E-09 | no |
| GLRX2    | 0.237875508  | 6.465686958  | 1.90E-10 | 1.21E-09 | no |
| LGALS12  | 0.237872437  | 6.465598474  | 1.90E-10 | 1.21E-09 | no |
| CD2BP2   | -0.237865982 | -6.465412485 | 1.90E-10 | 1.21E-09 | no |
| IRAK2    | 0.237801496  | 6.463554643  | 1.92E-10 | 1.23E-09 | no |
| ATP8A1   | -0.237687633 | -6.46027441  | 1.96E-10 | 1.25E-09 | no |
| COL22A1  | 0.237654497  | 6.459319874  | 1.97E-10 | 1.26E-09 | no |
| MAMLD1   | -0.237645834 | -6.459070324 | 1.98E-10 | 1.26E-09 | no |
| PAR-SN   | -0.237623503 | -6.458427062 | 1.98E-10 | 1.26E-09 | no |
| HSF2     | -0.237600343 | -6.457759913 | 1.99E-10 | 1.27E-09 | no |
| RBM43    | 0.237573033  | 6.45697326   | 2.00E-10 | 1.27E-09 | no |
| ARHGEF4  | -0.237562497 | -6.456669768 | 2.01E-10 | 1.28E-09 | no |
| IKZF5    | -0.237525839 | -6.455613871 | 2.02E-10 | 1.28E-09 | no |
| C10orf81 | 0.237450722  | 6.453450301  | 2.05E-10 | 1.30E-09 | no |
| PVT1     | 0.237422793  | 6.452645884  | 2.06E-10 | 1.31E-09 | no |
| POLR1D   | 0.237387186  | 6.451620385  | 2.07E-10 | 1.32E-09 | no |
| SDHA     | -0.237364182 | -6.450957844 | 2.08E-10 | 1.32E-09 | no |
| CYFIP2   | -0.237331131 | -6.450006008 | 2.09E-10 | 1.33E-09 | no |
| TOR1A    | 0.237257562  | 6.447887303  | 2.12E-10 | 1.34E-09 | no |
| GDAP1L1  | -0.237216943 | -6.446717602 | 2.13E-10 | 1.35E-09 | no |
| C5orf53  | -0.237181774 | -6.445704839 | 2.15E-10 | 1.36E-09 | no |
| LMAN2    | 0.237163233  | 6.445170936  | 2.16E-10 | 1.37E-09 | no |
| AGPAT9   | 0.237144792  | 6.444639919  | 2.16E-10 | 1.37E-09 | no |
| C22orf27 | -0.237129242 | -6.444192144 | 2.17E-10 | 1.37E-09 | no |
| NCK2     | 0.237111792  | 6.443689686  | 2.18E-10 | 1.38E-09 | no |
| PANK1    | -0.237057175 | -6.442117045 | 2.20E-10 | 1.39E-09 | no |
| PC       | -0.237056819 | -6.442106802 | 2.20E-10 | 1.39E-09 | no |
| ZNF321   | 0.237030871  | 6.441359669  | 2.21E-10 | 1.40E-09 | no |
| EPHB4    | 0.237018778  | 6.441011471  | 2.21E-10 | 1.40E-09 | no |
| TMEM107  | 0.237005155  | 6.440619239  | 2.22E-10 | 1.40E-09 | no |
| MMP24    | -0.236964909 | -6.439460468 | 2.23E-10 | 1.41E-09 | no |
| LIX1L    | -0.236949262 | -6.439009976 | 2.24E-10 | 1.42E-09 | no |
| CCIN     | 0.236939227  | 6.438721072  | 2.24E-10 | 1.42E-09 | no |
| SLC1A4   | -0.236910928 | -6.437906316 | 2.25E-10 | 1.42E-09 | no |
| MMP9     | 0.236856454  | 6.436338036  | 2.28E-10 | 1.44E-09 | no |
| BDNFOS   | -0.236831343 | -6.435615097 | 2.29E-10 | 1.44E-09 | no |
| KCNQ2    | -0.236804943 | -6.4348551   | 2.30E-10 | 1.45E-09 | no |
| HRH1     | 0.236803516  | 6.434814029  | 2.30E-10 | 1.45E-09 | no |
| HIST1H3E | 0.23676543   | 6.433717627  | 2.31E-10 | 1.46E-09 | no |
| ACAP3    | -0.236762672 | -6.433638235 | 2.32E-10 | 1.46E-09 | no |
| NKIRAS1  | -0.236752511 | -6.433345712 | 2.32E-10 | 1.46E-09 | no |
| KIAA0495 | 0.236735588  | 6.432858561  | 2.33E-10 | 1.47E-09 | no |
| TMEM151B | -0.23668577  | -6.431424501 | 2.35E-10 | 1.48E-09 | no |
| WHSC2    | -0.236662158 | -6.43074484  | 2.36E-10 | 1.48E-09 | no |
| PLEKHF2  | 0.236632524  | 6.429891816  | 2.37E-10 | 1.49E-09 | no |



|           |              |              |          |          |    |
|-----------|--------------|--------------|----------|----------|----|
| ZNF292    | -0.236626125 | -6.429707641 | 2.37E-10 | 1.49E-09 | no |
| SCD5      | -0.236556145 | -6.427693377 | 2.40E-10 | 1.51E-09 | no |
| DBN1      | -0.236480203 | -6.425507635 | 2.44E-10 | 1.53E-09 | no |
| FAM46A    | 0.236445012  | 6.424494808  | 2.45E-10 | 1.54E-09 | no |
| TRAPPC9   | -0.236425938 | -6.423945864 | 2.46E-10 | 1.55E-09 | no |
| SGSH      | 0.236408937  | 6.423456584  | 2.47E-10 | 1.55E-09 | no |
| MCM3APAS  | -0.236387796 | -6.422848151 | 2.48E-10 | 1.56E-09 | no |
| ARL13B    | 0.236360085  | 6.422050671  | 2.49E-10 | 1.56E-09 | no |
| KLHDC2    | -0.236345636 | -6.421634875 | 2.49E-10 | 1.57E-09 | no |
| C3orf59   | -0.236274045 | -6.419574658 | 2.53E-10 | 1.59E-09 | no |
| LOC644538 | 0.23626271   | 6.419248494  | 2.53E-10 | 1.59E-09 | no |
| TP53INP1  | 0.236249172  | 6.418858918  | 2.54E-10 | 1.59E-09 | no |
| PNRC2     | 0.236232129  | 6.418368485  | 2.55E-10 | 1.60E-09 | no |
| COQ3      | -0.236216747 | -6.417925873 | 2.55E-10 | 1.60E-09 | no |
| CD163L1   | 0.23618717   | 6.417074801  | 2.57E-10 | 1.61E-09 | no |
| EPYC      | 0.23617973   | 6.416860706  | 2.57E-10 | 1.61E-09 | no |
| PIGC      | 0.236162271  | 6.416358332  | 2.58E-10 | 1.61E-09 | no |
| G0S2      | 0.236144308  | 6.41584147   | 2.59E-10 | 1.62E-09 | no |
| SACM1L    | 0.236085423  | 6.41414716   | 2.61E-10 | 1.63E-09 | no |
| CAPN1     | 0.236085048  | 6.414136375  | 2.61E-10 | 1.63E-09 | no |
| QSOX2     | -0.236073163 | -6.413794423 | 2.62E-10 | 1.64E-09 | no |
| SLC9A6    | -0.236041583 | -6.412885803 | 2.63E-10 | 1.65E-09 | no |
| RAP1B     | 0.235997654  | 6.411621938  | 2.65E-10 | 1.66E-09 | no |
| ZNF696    | -0.235994125 | -6.411520404 | 2.66E-10 | 1.66E-09 | no |
| FEM1A     | -0.235964075 | -6.410655851 | 2.67E-10 | 1.67E-09 | no |
| FCAR      | 0.235934797  | 6.409813533  | 2.68E-10 | 1.68E-09 | no |
| LEP       | 0.235910671  | 6.409119463  | 2.70E-10 | 1.68E-09 | no |
| DIP2C     | -0.235881335 | -6.408275512 | 2.71E-10 | 1.69E-09 | no |
| PF4V1     | 0.235808458  | 6.406179059  | 2.75E-10 | 1.71E-09 | no |
| FBX0220S  | 0.235807582  | 6.406153841  | 2.75E-10 | 1.71E-09 | no |
| GDAP2     | 0.235772019  | 6.405130848  | 2.76E-10 | 1.72E-09 | no |
| NRARP     | -0.235759036 | -6.404757386 | 2.77E-10 | 1.73E-09 | no |
| SLC26A2   | 0.235734297  | 6.404045751  | 2.78E-10 | 1.73E-09 | no |
| TUT1      | -0.235723871 | -6.403745848 | 2.79E-10 | 1.74E-09 | no |
| AAGAB     | 0.235661304  | 6.401946188  | 2.82E-10 | 1.75E-09 | no |
| ATP13A3   | 0.235649653  | 6.401611055  | 2.82E-10 | 1.76E-09 | no |
| ALG1      | 0.235609791  | 6.400464511  | 2.84E-10 | 1.77E-09 | no |
| MAP1LC3C  | 0.235593145  | 6.399985742  | 2.85E-10 | 1.77E-09 | no |
| TMEM59    | 0.235590989  | 6.399923731  | 2.85E-10 | 1.77E-09 | no |
| MXRA5     | 0.235536335  | 6.398351841  | 2.88E-10 | 1.79E-09 | no |
| LRP4      | -0.23553542  | -6.398325501 | 2.88E-10 | 1.79E-09 | no |
| CLEC16A   | -0.23552578  | -6.398048253 | 2.89E-10 | 1.79E-09 | no |
| PPP1R3E   | -0.235513129 | -6.397684408 | 2.89E-10 | 1.80E-09 | no |
| MANF      | 0.23551145   | 6.397636136  | 2.89E-10 | 1.80E-09 | no |
| DENND5B   | -0.235485416 | -6.396887385 | 2.91E-10 | 1.80E-09 | no |
| C11orf95  | -0.235448811 | -6.395834678 | 2.93E-10 | 1.82E-09 | no |
| FBXL13    | 0.235369456  | 6.393552586  | 2.97E-10 | 1.84E-09 | no |
| OLFML1    | 0.235343406  | 6.39280347   | 2.98E-10 | 1.85E-09 | no |
| PGLYRP4   | 0.235323431  | 6.392229081  | 2.99E-10 | 1.86E-09 | no |
| WDR24     | -0.235280113 | -6.39098344  | 3.02E-10 | 1.87E-09 | no |
| TMED10    | 0.235268429  | 6.390647461  | 3.02E-10 | 1.87E-09 | no |

|           |              |              |          |          |    |
|-----------|--------------|--------------|----------|----------|----|
| ATP6V0E2  | -0.235192689 | -6.388469634 | 3.06E-10 | 1.90E-09 | no |
| FOXO4     | -0.235159732 | -6.387522039 | 3.08E-10 | 1.91E-09 | no |
| NUDT19    | 0.235141698  | 6.387003504  | 3.09E-10 | 1.91E-09 | no |
| DPY19L1   | 0.235133985  | 6.386781739  | 3.10E-10 | 1.92E-09 | no |
| GGT5      | 0.235117769  | 6.386315501  | 3.10E-10 | 1.92E-09 | no |
| ZNF423    | -0.235085278 | -6.385381363 | 3.12E-10 | 1.93E-09 | no |
| C7orf23   | 0.235074592  | 6.385074122  | 3.13E-10 | 1.93E-09 | no |
| RNF145    | 0.235044487  | 6.384208597  | 3.14E-10 | 1.94E-09 | no |
| B4GALT5   | 0.235020868  | 6.383529536  | 3.16E-10 | 1.95E-09 | no |
| TAGAP     | 0.235006471  | 6.383115633  | 3.17E-10 | 1.96E-09 | no |
| LOX       | 0.234898105  | 6.380000345  | 3.23E-10 | 1.99E-09 | no |
| PROK2     | 0.234830209  | 6.378048587  | 3.27E-10 | 2.02E-09 | no |
| ITGBL1    | 0.234816868  | 6.377665088  | 3.27E-10 | 2.02E-09 | no |
| RAB6B     | -0.234805178 | -6.37732905  | 3.28E-10 | 2.02E-09 | no |
| ZNF197    | -0.234776439 | -6.376502974 | 3.30E-10 | 2.03E-09 | no |
| ZC3H7B    | -0.234707615 | -6.374524714 | 3.34E-10 | 2.06E-09 | no |
| C14orf169 | 0.234692055  | 6.374077486  | 3.35E-10 | 2.06E-09 | no |
| NGDN      | -0.234680814 | -6.3737544   | 3.35E-10 | 2.07E-09 | no |
| TCTN1     | 0.234611813  | 6.371771212  | 3.40E-10 | 2.09E-09 | no |
| ELP2P     | -0.234585894 | -6.371026281 | 3.41E-10 | 2.10E-09 | no |
| KCNB1     | -0.234584066 | -6.370973753 | 3.41E-10 | 2.10E-09 | no |
| ZBTB12    | -0.234519188 | -6.369109173 | 3.45E-10 | 2.12E-09 | no |
| TSC22D1   | -0.234427935 | -6.366486787 | 3.51E-10 | 2.16E-09 | no |
| PTCD3     | -0.234360182 | -6.36453981  | 3.55E-10 | 2.18E-09 | no |
| PPP1CB    | 0.234313365  | 6.363194539  | 3.58E-10 | 2.20E-09 | no |
| FMO1      | 0.234297277  | 6.362732279  | 3.59E-10 | 2.21E-09 | no |
| EMP2      | 0.234294718  | 6.362658726  | 3.59E-10 | 2.21E-09 | no |
| TRPM7     | 0.23424256   | 6.361160063  | 3.62E-10 | 2.23E-09 | no |
| BCAR1     | -0.234223875 | -6.360623184 | 3.64E-10 | 2.23E-09 | no |
| ZNF91     | -0.234180998 | -6.359391235 | 3.66E-10 | 2.25E-09 | no |
| TRIP10    | 0.234143947  | 6.358326732  | 3.69E-10 | 2.26E-09 | no |
| FGGY      | 0.234064399  | 6.356041319  | 3.74E-10 | 2.30E-09 | no |
| GPR45     | -0.234056929 | -6.35582672  | 3.75E-10 | 2.30E-09 | no |
| CLN5      | 0.234034868  | 6.355192948  | 3.76E-10 | 2.31E-09 | no |
| TSEN2     | -0.234012749 | -6.354557503 | 3.77E-10 | 2.31E-09 | no |
| FLJ90757  | -0.234009941 | -6.354476817 | 3.78E-10 | 2.31E-09 | no |
| DCAF7     | -0.234000506 | -6.354205788 | 3.78E-10 | 2.32E-09 | no |
| PLS3      | 0.233982086  | 6.353676623  | 3.80E-10 | 2.32E-09 | no |
| REPIN1    | -0.233967771 | -6.353265377 | 3.80E-10 | 2.33E-09 | no |
| ASB1      | -0.233963204 | -6.353134183 | 3.81E-10 | 2.33E-09 | no |
| SPOCD1    | 0.233944505  | 6.352597048  | 3.82E-10 | 2.34E-09 | no |
| UBE2D3    | 0.233901597  | 6.351364462  | 3.85E-10 | 2.35E-09 | no |
| PNMAL1    | -0.233886866 | -6.350941312 | 3.86E-10 | 2.36E-09 | no |
| MEF2A     | 0.233880824  | 6.350767745  | 3.86E-10 | 2.36E-09 | no |
| ZNF425    | -0.233839755 | -6.349588057 | 3.89E-10 | 2.38E-09 | no |
| NR1H3     | 0.233827915  | 6.349247953  | 3.90E-10 | 2.38E-09 | no |
| ATP1A3    | -0.233823969 | -6.349134614 | 3.90E-10 | 2.38E-09 | no |
| MTMR14    | 0.23382341   | 6.349118567  | 3.90E-10 | 2.38E-09 | no |
| TM2D3     | -0.233799002 | -6.348417457 | 3.92E-10 | 2.39E-09 | no |
| NDUFV1    | -0.233778587 | -6.347831099 | 3.93E-10 | 2.40E-09 | no |
| EFNB2     | 0.233753418  | 6.347108155  | 3.95E-10 | 2.41E-09 | no |

|           |              |              |          |          |    |
|-----------|--------------|--------------|----------|----------|----|
| TBC1D16   | 0.233720564  | 6.346164517  | 3.97E-10 | 2.42E-09 | no |
| ITGA9     | 0.233717666  | 6.346081297  | 3.98E-10 | 2.42E-09 | no |
| LBXCOR1   | -0.233690922 | -6.345313172 | 4.00E-10 | 2.44E-09 | no |
| FRMD4B    | 0.233679813  | 6.344994102  | 4.00E-10 | 2.44E-09 | no |
| TMCC1     | -0.233590855 | -6.342439238 | 4.07E-10 | 2.48E-09 | no |
| NQO1      | 0.233566423  | 6.341737586  | 4.08E-10 | 2.49E-09 | no |
| SAFB2     | -0.233562823 | -6.341634216 | 4.09E-10 | 2.49E-09 | no |
| CCDC152   | 0.233511113  | 6.340149203  | 4.12E-10 | 2.51E-09 | no |
| NLGN3     | -0.233458068 | -6.338625931 | 4.16E-10 | 2.53E-09 | no |
| MFS11     | 0.233427235  | 6.337740533  | 4.19E-10 | 2.55E-09 | no |
| SYT17     | -0.233391234 | -6.336706751 | 4.21E-10 | 2.56E-09 | no |
| FSIP1     | 0.233370184  | 6.33610232   | 4.23E-10 | 2.57E-09 | no |
| TTYH1     | -0.233331888 | -6.335002688 | 4.26E-10 | 2.59E-09 | no |
| CAMK2N2   | -0.233316623 | -6.334564391 | 4.27E-10 | 2.59E-09 | no |
| NBEA      | -0.233287238 | -6.333720663 | 4.29E-10 | 2.61E-09 | no |
| POM121L8P | 0.23326566   | 6.333101095  | 4.31E-10 | 2.61E-09 | no |
| 2-Mar     | 0.233258179  | 6.332886327  | 4.31E-10 | 2.62E-09 | no |
| RFXAP     | -0.233226067 | -6.331964322 | 4.34E-10 | 2.63E-09 | no |
| ABCB4     | 0.233217113  | 6.331707248  | 4.34E-10 | 2.63E-09 | no |
| C2orf85   | -0.233171127 | -6.330386959 | 4.38E-10 | 2.66E-09 | no |
| VAMP2     | -0.233133971 | -6.32932024  | 4.41E-10 | 2.67E-09 | no |
| NUP37     | 0.233123727  | 6.329026149  | 4.42E-10 | 2.68E-09 | no |
| NOS3      | 0.233122024  | 6.328977239  | 4.42E-10 | 2.68E-09 | no |
| TRIM37    | -0.233109804 | -6.328626416 | 4.43E-10 | 2.68E-09 | no |
| KLF15     | -0.233109046 | -6.32860466  | 4.43E-10 | 2.68E-09 | no |
| MANEAL    | -0.233047605 | -6.326840798 | 4.47E-10 | 2.71E-09 | no |
| SUSD4     | -0.233019216 | -6.326025845 | 4.50E-10 | 2.72E-09 | no |
| AKAP13    | 0.232976843  | 6.324809457  | 4.53E-10 | 2.74E-09 | no |
| C1orf226  | 0.232934682  | 6.323599204  | 4.56E-10 | 2.76E-09 | no |
| C19orf10  | 0.232862084  | 6.321515349  | 4.62E-10 | 2.80E-09 | no |
| GRIK2     | -0.232796616 | -6.319636222 | 4.68E-10 | 2.83E-09 | no |
| B4GALNT4  | -0.232777166 | -6.319077972 | 4.69E-10 | 2.84E-09 | no |
| GPM6B     | -0.232753211 | -6.318390428 | 4.71E-10 | 2.85E-09 | no |
| NR5A2     | 0.232734814  | 6.317862425  | 4.73E-10 | 2.85E-09 | no |
| HIPK2     | -0.232733199 | -6.317816076 | 4.73E-10 | 2.85E-09 | no |
| TM7SF4    | 0.232727844  | 6.31766239   | 4.73E-10 | 2.86E-09 | no |
| KIAA0195  | -0.232685778 | -6.316455071 | 4.77E-10 | 2.88E-09 | no |
| FOXO3B    | -0.232665033 | -6.31585972  | 4.79E-10 | 2.89E-09 | no |
| ZNF250    | -0.232597879 | -6.313932487 | 4.84E-10 | 2.92E-09 | no |
| KLHDC1    | -0.232548835 | -6.312525046 | 4.88E-10 | 2.94E-09 | no |
| LMLN      | 0.232526631  | 6.311887875  | 4.90E-10 | 2.96E-09 | no |
| CNIH4     | 0.232457862  | 6.309914493  | 4.96E-10 | 2.99E-09 | no |
| FAM84B    | -0.232438782 | -6.309366996 | 4.98E-10 | 3.00E-09 | no |
| CDKN1B    | -0.232362764 | -6.307185779 | 5.05E-10 | 3.04E-09 | no |
| SIGLEC12  | 0.232352597  | 6.306894061  | 5.06E-10 | 3.04E-09 | no |
| C21orf88  | 0.232332473  | 6.306316649  | 5.07E-10 | 3.05E-09 | no |
| CMT8      | 0.232308959  | 6.305641986  | 5.09E-10 | 3.06E-09 | no |
| C19orf38  | 0.232239524  | 6.303649808  | 5.16E-10 | 3.10E-09 | no |
| POGZ      | -0.232203763 | -6.30262383  | 5.19E-10 | 3.12E-09 | no |
| ACADS     | 0.232191913  | 6.302283876  | 5.20E-10 | 3.13E-09 | no |
| SNRPN     | -0.232106108 | -6.29982227  | 5.28E-10 | 3.17E-09 | no |

|           |              |              |          |          |    |
|-----------|--------------|--------------|----------|----------|----|
| POP4      | 0.23210211   | 6.299707565  | 5.28E-10 | 3.17E-09 | no |
| SPTBN4    | -0.232100917 | -6.299673345 | 5.28E-10 | 3.17E-09 | no |
| FTO       | -0.232095151 | -6.299507942 | 5.29E-10 | 3.17E-09 | no |
| FAM151B   | 0.232069288  | 6.298765999  | 5.31E-10 | 3.19E-09 | no |
| TBC1D17   | -0.232044185 | -6.298045884 | 5.34E-10 | 3.20E-09 | no |
| CROT      | 0.232006309  | 6.296959375  | 5.37E-10 | 3.22E-09 | no |
| TNFAIP6   | 0.231977355  | 6.29612882   | 5.40E-10 | 3.24E-09 | no |
| CKLF      | 0.231959606  | 6.295619705  | 5.42E-10 | 3.25E-09 | no |
| AKNA      | 0.231944309  | 6.295180942  | 5.43E-10 | 3.25E-09 | no |
| MAP3K14   | 0.231931267  | 6.294806824  | 5.44E-10 | 3.26E-09 | no |
| GTF3C5    | -0.231872246 | -6.293113932 | 5.50E-10 | 3.29E-09 | no |
| TSPAN3    | -0.231870622 | -6.293067357 | 5.50E-10 | 3.29E-09 | no |
| NTRK3     | -0.231842182 | -6.292251627 | 5.53E-10 | 3.31E-09 | no |
| MRPS31    | -0.231789039 | -6.290727413 | 5.58E-10 | 3.34E-09 | no |
| SV2A      | -0.231767273 | -6.290103142 | 5.60E-10 | 3.35E-09 | no |
| RP2       | 0.231758616  | 6.28985485   | 5.61E-10 | 3.35E-09 | no |
| LDHA      | 0.231703399  | 6.288271269  | 5.66E-10 | 3.39E-09 | no |
| MTMR15    | -0.231652956 | -6.286824626 | 5.71E-10 | 3.41E-09 | no |
| ALDH1A2   | 0.231631312  | 6.286203943  | 5.74E-10 | 3.43E-09 | no |
| KIAA0652  | -0.231561161 | -6.28419223  | 5.81E-10 | 3.47E-09 | no |
| APLN      | 0.231542657  | 6.283661605  | 5.83E-10 | 3.48E-09 | no |
| CGREF1    | -0.231531452 | -6.283340317 | 5.84E-10 | 3.48E-09 | no |
| SLC25A36  | -0.231519639 | -6.283001562 | 5.85E-10 | 3.49E-09 | no |
| ProSAPiP1 | -0.231495809 | -6.282318258 | 5.87E-10 | 3.50E-09 | no |
| FRMPD1    | -0.231451348 | -6.281043374 | 5.92E-10 | 3.53E-09 | no |
| ARMCX1    | -0.231406332 | -6.279752606 | 5.97E-10 | 3.56E-09 | no |
| PALM      | -0.231401284 | -6.279607883 | 5.97E-10 | 3.56E-09 | no |
| NKAIN1    | -0.231384326 | -6.279121642 | 5.99E-10 | 3.57E-09 | no |
| GPR39     | 0.231334229  | 6.277685269  | 6.04E-10 | 3.60E-09 | no |
| MLEC      | 0.231326646  | 6.277467857  | 6.05E-10 | 3.60E-09 | no |
| MBOAT2    | -0.23132482  | -6.277415511 | 6.05E-10 | 3.60E-09 | no |
| ZSWIM5    | -0.231285223 | -6.276280243 | 6.09E-10 | 3.63E-09 | no |
| NLGN1     | -0.23115497  | -6.272546044 | 6.23E-10 | 3.71E-09 | no |
| ZNF510    | -0.231091054 | -6.270713786 | 6.30E-10 | 3.75E-09 | no |
| CACNA2D2  | -0.231050233 | -6.269543623 | 6.35E-10 | 3.77E-09 | no |
| SLC25A42  | -0.231032832 | -6.269044819 | 6.37E-10 | 3.78E-09 | no |
| CXorf50B  | -0.231031628 | -6.269010298 | 6.37E-10 | 3.78E-09 | no |
| FAM26E    | 0.231028108  | 6.268909404  | 6.37E-10 | 3.79E-09 | no |
| EGF       | 0.230919075  | 6.265784114  | 6.49E-10 | 3.86E-09 | no |
| C17orf57  | 0.230908173  | 6.265471635  | 6.51E-10 | 3.86E-09 | no |
| NOG       | -0.230856514 | -6.263990997 | 6.57E-10 | 3.90E-09 | no |
| PLXDC1    | 0.230779276  | 6.261777336  | 6.65E-10 | 3.95E-09 | no |
| TAF13     | 0.230726424  | 6.260262653  | 6.72E-10 | 3.98E-09 | no |
| OST4      | 0.230677933  | 6.258872985  | 6.77E-10 | 4.02E-09 | no |
| LOC285419 | 0.230657955  | 6.258300478  | 6.80E-10 | 4.03E-09 | no |
| BTBD2     | -0.230636749 | -6.257692784 | 6.82E-10 | 4.04E-09 | no |
| JARID2    | -0.230587815 | -6.256290524 | 6.88E-10 | 4.08E-09 | no |
| ZYX       | 0.23058534   | 6.256219602  | 6.88E-10 | 4.08E-09 | no |
| DCAF16    | -0.230541632 | -6.254967148 | 6.94E-10 | 4.11E-09 | no |
| LMO2      | 0.23052598   | 6.254518653  | 6.95E-10 | 4.12E-09 | no |
| ASF1A     | -0.230510745 | -6.254082101 | 6.97E-10 | 4.13E-09 | no |

|           |              |              |          |          |    |
|-----------|--------------|--------------|----------|----------|----|
| TRMT11    | -0.230463387 | -6.252725134 | 7.03E-10 | 4.16E-09 | no |
| GPRC5A    | 0.230460702  | 6.252648194  | 7.03E-10 | 4.16E-09 | no |
| SMYD5     | -0.230447464 | -6.252268907 | 7.05E-10 | 4.17E-09 | no |
| 8-Sep     | -0.230446388 | -6.252238053 | 7.05E-10 | 4.17E-09 | no |
| C16orf5   | -0.230431825 | -6.251820811 | 7.07E-10 | 4.18E-09 | no |
| POM121L9P | 0.230351486  | 6.249518966  | 7.17E-10 | 4.24E-09 | no |
| PTGR2     | -0.230332784 | -6.248983158 | 7.19E-10 | 4.25E-09 | no |
| NAALADL1  | 0.230263149  | 6.24698813   | 7.28E-10 | 4.30E-09 | no |
| GJA4      | 0.230247195  | 6.246531084  | 7.30E-10 | 4.31E-09 | no |
| RCAN1     | 0.23023688   | 6.246235565  | 7.31E-10 | 4.32E-09 | no |
| SCO1      | 0.230203566  | 6.245281205  | 7.35E-10 | 4.34E-09 | no |
| AGMAT     | 0.230193099  | 6.244981342  | 7.37E-10 | 4.35E-09 | no |
| TRAPPC3   | 0.230138341  | 6.243412701  | 7.44E-10 | 4.39E-09 | no |
| DGCR14    | -0.230074785 | -6.241592104 | 7.52E-10 | 4.43E-09 | no |
| CNTFR     | -0.230070573 | -6.241471465 | 7.53E-10 | 4.43E-09 | no |
| C11orf49  | -0.230069203 | -6.241432229 | 7.53E-10 | 4.43E-09 | no |
| KCNE1     | 0.229999789  | 6.239443918  | 7.62E-10 | 4.49E-09 | no |
| UTP15     | 0.229958059  | 6.238248675  | 7.67E-10 | 4.52E-09 | no |
| HMGCR     | -0.22994948  | -6.238002933 | 7.69E-10 | 4.52E-09 | no |
| ZNF740    | -0.229938188 | -6.237679518 | 7.70E-10 | 4.53E-09 | no |
| GPT2      | -0.22989522  | -6.236448841 | 7.76E-10 | 4.56E-09 | no |
| MDK       | 0.229863594  | 6.235543053  | 7.80E-10 | 4.59E-09 | no |
| TXNDC12   | 0.229854544  | 6.235283846  | 7.81E-10 | 4.59E-09 | no |
| CNTNAP3   | 0.229842239  | 6.234931427  | 7.83E-10 | 4.60E-09 | no |
| PLVAP     | 0.229835524  | 6.234739132  | 7.84E-10 | 4.61E-09 | no |
| TFPI      | 0.229762552  | 6.232649281  | 7.94E-10 | 4.66E-09 | no |
| FOXC1     | 0.22974852   | 6.232247427  | 7.96E-10 | 4.67E-09 | no |
| PRMT7     | -0.229746068 | -6.232177208 | 7.96E-10 | 4.67E-09 | no |
| WAC       | -0.229745328 | -6.232156011 | 7.96E-10 | 4.67E-09 | no |
| B3GNT3    | 0.229668739  | 6.229962723  | 8.07E-10 | 4.73E-09 | no |
| CPA3      | 0.229617886  | 6.228506508  | 8.14E-10 | 4.77E-09 | no |
| MAML3     | 0.229612488  | 6.228351921  | 8.15E-10 | 4.78E-09 | no |
| PCCA      | -0.229572803 | -6.227215546 | 8.20E-10 | 4.81E-09 | no |
| TXN       | 0.229564047  | 6.226964824  | 8.22E-10 | 4.82E-09 | no |
| C17orf86  | -0.229527246 | -6.225911067 | 8.27E-10 | 4.84E-09 | no |
| VKORC1    | 0.229507127  | 6.22533502   | 8.30E-10 | 4.86E-09 | no |
| SCD       | -0.229485642 | -6.224719826 | 8.33E-10 | 4.88E-09 | no |
| ING5      | -0.229473582 | -6.224374526 | 8.35E-10 | 4.89E-09 | no |
| CNTN3     | -0.229451737 | -6.223749056 | 8.38E-10 | 4.90E-09 | no |
| TMED8     | -0.229433571 | -6.223228936 | 8.40E-10 | 4.92E-09 | no |
| LY6E      | 0.229403847  | 6.22237789   | 8.45E-10 | 4.94E-09 | no |
| EPHB1     | -0.229306933 | -6.219603278 | 8.59E-10 | 5.02E-09 | no |
| PSME1     | 0.22930645   | 6.219589449  | 8.59E-10 | 5.02E-09 | no |
| KIAA1033  | 0.229299899  | 6.219401887  | 8.60E-10 | 5.03E-09 | no |
| C21orf71  | -0.229230155 | -6.217405277 | 8.71E-10 | 5.09E-09 | no |
| OTUD5     | -0.229203323 | -6.216637145 | 8.75E-10 | 5.11E-09 | no |
| BAT1AP2L1 | 0.229045725  | 6.212125889  | 8.99E-10 | 5.25E-09 | no |
| ELAVL4    | -0.229037758 | -6.211897859 | 9.00E-10 | 5.25E-09 | no |
| SART1     | -0.229017057 | -6.211305325 | 9.03E-10 | 5.27E-09 | no |
| TMEM165   | 0.229014727  | 6.211238644  | 9.04E-10 | 5.27E-09 | no |
| BAP1      | -0.228897447 | -6.207881912 | 9.22E-10 | 5.38E-09 | no |

|           |              |              |          |          |    |
|-----------|--------------|--------------|----------|----------|----|
| TMED3     | 0.228859981  | 6.206809638  | 9.28E-10 | 5.41E-09 | no |
| MPP2      | -0.228857599 | -6.206741466 | 9.28E-10 | 5.41E-09 | no |
| LRRN1     | -0.228849624 | -6.206513218 | 9.30E-10 | 5.42E-09 | no |
| SNAI3     | 0.228816938  | 6.205577781  | 9.35E-10 | 5.45E-09 | no |
| IGHMBP2   | -0.228796364 | -6.204988992 | 9.38E-10 | 5.46E-09 | no |
| KREMEN1   | 0.228793985  | 6.204920883  | 9.39E-10 | 5.46E-09 | no |
| TMEM100   | -0.22875434  | -6.203786354 | 9.45E-10 | 5.50E-09 | no |
| FRZB      | 0.228722363  | 6.202871254  | 9.50E-10 | 5.53E-09 | no |
| NKRF      | -0.228684767 | -6.201795399 | 9.56E-10 | 5.56E-09 | no |
| ACTR6     | -0.22863698  | -6.200427946 | 9.64E-10 | 5.61E-09 | no |
| CNNM3     | -0.228594709 | -6.199218389 | 9.71E-10 | 5.65E-09 | no |
| DHX58     | 0.228592753  | 6.199162421  | 9.72E-10 | 5.65E-09 | no |
| ZNF493    | -0.22856378  | -6.198333385 | 9.77E-10 | 5.67E-09 | no |
| IRF7      | 0.228542452  | 6.197723122  | 9.80E-10 | 5.69E-09 | no |
| PPT2      | -0.228515991 | -6.196966025 | 9.85E-10 | 5.72E-09 | no |
| SPATA18   | 0.228511726  | 6.19684399   | 9.85E-10 | 5.72E-09 | no |
| FABP5     | 0.228491415  | 6.196262833  | 9.89E-10 | 5.74E-09 | no |
| MGC21881  | -0.228462734 | -6.195442242 | 9.94E-10 | 5.76E-09 | no |
| DOPEY1    | -0.228396576 | -6.193549414 | 1.01E-09 | 5.83E-09 | no |
| ZNF860    | 0.228395188  | 6.193509687  | 1.01E-09 | 5.83E-09 | no |
| SPG7      | -0.2283847   | -6.193209638 | 1.01E-09 | 5.84E-09 | no |
| XAB2      | -0.228354862 | -6.192356001 | 1.01E-09 | 5.87E-09 | no |
| CSF1      | 0.22834421   | 6.192051232  | 1.01E-09 | 5.88E-09 | no |
| HDGFRP2   | -0.228331364 | -6.191683727 | 1.02E-09 | 5.89E-09 | no |
| SNHG1     | -0.228296098 | -6.190674849 | 1.02E-09 | 5.92E-09 | no |
| DPF2      | -0.22821437  | -6.188336841 | 1.04E-09 | 6.00E-09 | no |
| SFRS18    | -0.22816982  | -6.187062451 | 1.05E-09 | 6.05E-09 | no |
| ZDHHC1    | 0.228135661  | 6.186085344  | 1.05E-09 | 6.08E-09 | no |
| TMEM63C   | -0.228035395 | -6.183217374 | 1.07E-09 | 6.19E-09 | no |
| LOC285830 | 0.227897273  | 6.179266934  | 1.10E-09 | 6.33E-09 | no |
| STX1B     | -0.227858225 | -6.178150188 | 1.10E-09 | 6.37E-09 | no |
| ZNF534    | -0.227708835 | -6.173878043 | 1.13E-09 | 6.54E-09 | no |
| ABCA9     | 0.227698092  | 6.173570843  | 1.13E-09 | 6.55E-09 | no |
| RNF39     | -0.227696933 | -6.173537691 | 1.13E-09 | 6.55E-09 | no |
| TMEM19    | 0.227606546  | 6.170953123  | 1.15E-09 | 6.65E-09 | no |
| TMEM156   | 0.227596679  | 6.170670976  | 1.15E-09 | 6.66E-09 | no |
| DR1       | 0.227542292  | 6.169115913  | 1.16E-09 | 6.72E-09 | no |
| KLHDC5    | -0.227536988 | -6.168964242 | 1.17E-09 | 6.72E-09 | no |
| HAVCR1    | 0.227512007  | 6.168250002  | 1.17E-09 | 6.75E-09 | no |
| NID1      | 0.227498927  | 6.167876026  | 1.17E-09 | 6.76E-09 | no |
| PDE9A     | -0.227495494 | -6.167777867 | 1.17E-09 | 6.76E-09 | no |
| CNPY3     | 0.227452663  | 6.166553302  | 1.18E-09 | 6.81E-09 | no |
| TSPYL2    | -0.227427158 | -6.165824088 | 1.19E-09 | 6.84E-09 | no |
| HUS1      | 0.227416356  | 6.165515269  | 1.19E-09 | 6.85E-09 | no |
| DHDDS     | 0.227399026  | 6.165019816  | 1.19E-09 | 6.87E-09 | no |
| IL1A      | 0.227282659  | 6.161693075  | 1.22E-09 | 7.00E-09 | no |
| ATP7B     | -0.22727503  | -6.161474984 | 1.22E-09 | 7.01E-09 | no |
| PTGFRN    | 0.227269837  | 6.161326559  | 1.22E-09 | 7.01E-09 | no |
| WBP2      | -0.22725929  | -6.161025052 | 1.22E-09 | 7.03E-09 | no |
| CCL18     | 0.227257184  | 6.160964829  | 1.22E-09 | 7.03E-09 | no |
| KIAA1737  | -0.227143629 | -6.157718848 | 1.25E-09 | 7.16E-09 | no |

|           |              |              |          |          |    |
|-----------|--------------|--------------|----------|----------|----|
| TMEFF2    | -0.227133205 | -6.157420863 | 1.25E-09 | 7.17E-09 | no |
| LPHN3     | -0.227101957 | -6.156527682 | 1.26E-09 | 7.21E-09 | no |
| HYAL2     | 0.227046166  | 6.154933035  | 1.27E-09 | 7.28E-09 | no |
| GABRA3    | -0.226964199 | -6.152590329 | 1.29E-09 | 7.38E-09 | no |
| PSMD9     | 0.226943309  | 6.151993263  | 1.29E-09 | 7.40E-09 | no |
| MOAP1     | -0.226940969 | -6.151926403 | 1.29E-09 | 7.40E-09 | no |
| NLE1      | -0.226937459 | -6.15182609  | 1.29E-09 | 7.40E-09 | no |
| RHBDD1    | 0.226928596  | 6.151572771  | 1.29E-09 | 7.41E-09 | no |
| CHD7      | -0.226824978 | -6.148611519 | 1.32E-09 | 7.54E-09 | no |
| RNF187    | -0.22680117  | -6.147931133 | 1.32E-09 | 7.57E-09 | no |
| TRO       | -0.226773874 | -6.147151101 | 1.33E-09 | 7.61E-09 | no |
| GPN1      | 0.226762847  | 6.146835986  | 1.33E-09 | 7.62E-09 | no |
| APITD1    | 0.226730793  | 6.145920029  | 1.34E-09 | 7.66E-09 | no |
| RASSF8    | 0.226675699  | 6.144345721  | 1.35E-09 | 7.73E-09 | no |
| FUBP3     | -0.226584103 | -6.141728474 | 1.37E-09 | 7.85E-09 | no |
| RBPM5     | 0.226576851  | 6.141521257  | 1.37E-09 | 7.85E-09 | no |
| TEAD3     | 0.226488487  | 6.138996555  | 1.39E-09 | 7.97E-09 | no |
| HMGCS1    | -0.226464689 | -6.138316652 | 1.40E-09 | 8.00E-09 | no |
| FAM120C   | -0.226436158 | -6.137501529 | 1.41E-09 | 8.04E-09 | no |
| KIAA1147  | -0.226364779 | -6.135462309 | 1.42E-09 | 8.13E-09 | no |
| TUBGCP2   | -0.226361929 | -6.135380879 | 1.42E-09 | 8.14E-09 | no |
| CLIP1     | 0.226329243  | 6.134447102  | 1.43E-09 | 8.18E-09 | no |
| SAPS2     | -0.226310839 | -6.133921349 | 1.44E-09 | 8.20E-09 | no |
| THADA     | 0.226308599  | 6.133857374  | 1.44E-09 | 8.20E-09 | no |
| DAGLB     | 0.226265065  | 6.132613748  | 1.45E-09 | 8.26E-09 | no |
| ST8SIA3   | -0.226260366 | -6.132479531 | 1.45E-09 | 8.27E-09 | no |
| ZEB1      | -0.226239253 | -6.131876406 | 1.45E-09 | 8.29E-09 | no |
| RAB13     | 0.226236886  | 6.131808786  | 1.45E-09 | 8.30E-09 | no |
| FLJ35776  | 0.226228307  | 6.13156374   | 1.46E-09 | 8.31E-09 | no |
| SLC17A5   | 0.226170659  | 6.12991702   | 1.47E-09 | 8.38E-09 | no |
| SEC16B    | 0.22616468   | 6.129746249  | 1.47E-09 | 8.39E-09 | no |
| PAMR1     | 0.226127407  | 6.128681585  | 1.48E-09 | 8.44E-09 | no |
| SIK3      | -0.226030392 | -6.125910621 | 1.51E-09 | 8.58E-09 | no |
| EEPDI     | -0.226013987 | -6.12544207  | 1.51E-09 | 8.60E-09 | no |
| LRRRC47   | -0.22600482  | -6.125180243 | 1.51E-09 | 8.61E-09 | no |
| FAM188B   | 0.225977144  | 6.124389809  | 1.52E-09 | 8.65E-09 | no |
| SPSB3     | -0.225914703 | -6.122606533 | 1.54E-09 | 8.74E-09 | no |
| SH3GL2    | -0.225870866 | -6.121354597 | 1.55E-09 | 8.80E-09 | no |
| AKAP8L    | -0.225854204 | -6.120878753 | 1.55E-09 | 8.83E-09 | no |
| ARPC4     | 0.225848994  | 6.120729976  | 1.55E-09 | 8.83E-09 | no |
| LOC647979 | -0.225799517 | -6.119317052 | 1.57E-09 | 8.90E-09 | no |
| CXCR1     | 0.225798945  | 6.119300718  | 1.57E-09 | 8.90E-09 | no |
| C9orf25   | -0.225797808 | -6.119268255 | 1.57E-09 | 8.90E-09 | no |
| NAGLU     | 0.225736802  | 6.117526181  | 1.58E-09 | 8.99E-09 | no |
| TCEAL5    | -0.225724853 | -6.117184975 | 1.59E-09 | 9.01E-09 | no |
| PRRX1     | 0.225711154  | 6.1167938    | 1.59E-09 | 9.03E-09 | no |
| ZNF609    | -0.225663581 | -6.115435364 | 1.60E-09 | 9.10E-09 | no |
| C19orf59  | 0.225628086  | 6.114421856  | 1.61E-09 | 9.15E-09 | no |
| TOX3      | -0.225615132 | -6.114051987 | 1.62E-09 | 9.17E-09 | no |
| ACTR1A    | -0.225574098 | -6.112880381 | 1.63E-09 | 9.23E-09 | no |
| HELB      | 0.225556582  | 6.112380246  | 1.63E-09 | 9.25E-09 | no |

|              |              |              |          |          |    |
|--------------|--------------|--------------|----------|----------|----|
| SLC2A4RG     | 0.225546881  | 6.11210328   | 1.64E-09 | 9.27E-09 | no |
| SMC5         | 0.225458175  | 6.109570667  | 1.66E-09 | 9.40E-09 | no |
| CLCN6        | -0.225443683 | -6.109156912 | 1.67E-09 | 9.42E-09 | no |
| C1orf174     | 0.225420387  | 6.108491848  | 1.67E-09 | 9.46E-09 | no |
| CRTAC1       | -0.225414049 | -6.108310915 | 1.67E-09 | 9.47E-09 | no |
| KCNJ9        | -0.225411239 | -6.108230672 | 1.67E-09 | 9.47E-09 | no |
| KHSRP        | -0.225399556 | -6.107897156 | 1.68E-09 | 9.48E-09 | no |
| PDP2         | -0.225370336 | -6.107062974 | 1.69E-09 | 9.53E-09 | no |
| DUSP6        | 0.225367951  | 6.106994869  | 1.69E-09 | 9.53E-09 | no |
| MTHFD1L      | 0.225329642  | 6.105901257  | 1.70E-09 | 9.59E-09 | no |
| RGS16        | 0.22524918   | 6.10360438   | 1.72E-09 | 9.72E-09 | no |
| TOM1L1       | 0.225184238  | 6.101750609  | 1.74E-09 | 9.82E-09 | no |
| FGFR1        | 0.225176443  | 6.101528103  | 1.74E-09 | 9.83E-09 | no |
| C1orf91      | 0.225111743  | 6.099681364  | 1.76E-09 | 9.94E-09 | no |
| WRNIP1       | -0.225078163 | -6.098722922 | 1.77E-09 | 9.99E-09 | no |
| STK25        | -0.22506441  | -6.098330377 | 1.78E-09 | 1.00E-08 | no |
| EDC3         | -0.225018997 | -6.097034225 | 1.79E-09 | 1.01E-08 | no |
| TMEM220      | 0.224949771  | 6.095058527  | 1.81E-09 | 1.02E-08 | no |
| PSD          | -0.224933361 | -6.094590187 | 1.82E-09 | 1.02E-08 | no |
| ZFP36        | 0.224928787  | 6.094459646  | 1.82E-09 | 1.02E-08 | no |
| ARSJ         | 0.224925195  | 6.094357148  | 1.82E-09 | 1.02E-08 | no |
| C5orf30      | -0.224913397 | -6.094020441 | 1.82E-09 | 1.03E-08 | no |
| KIAA1539     | 0.224893306  | 6.093447067  | 1.83E-09 | 1.03E-08 | no |
| CMPK2        | 0.224868534  | 6.09274013   | 1.84E-09 | 1.03E-08 | no |
| DNAJC7       | -0.224859649 | -6.092486566 | 1.84E-09 | 1.03E-08 | no |
| STK38        | 0.224836563  | 6.091827752  | 1.85E-09 | 1.04E-08 | no |
| JUNB         | 0.224829211  | 6.091617968  | 1.85E-09 | 1.04E-08 | no |
| PBX1         | -0.224823691 | -6.091460425 | 1.85E-09 | 1.04E-08 | no |
| TSPYL3       | -0.224814321 | -6.091193036 | 1.85E-09 | 1.04E-08 | no |
| C15orf17     | -0.224810439 | -6.091082256 | 1.85E-09 | 1.04E-08 | no |
| OSBPL10      | 0.224768577  | 6.089887688  | 1.87E-09 | 1.05E-08 | no |
| HOXA1        | 0.224721997  | 6.088558514  | 1.88E-09 | 1.06E-08 | no |
| RPAP1        | -0.224708045 | -6.088160399 | 1.89E-09 | 1.06E-08 | no |
| LOC100133545 | -0.224690146 | -6.087649684 | 1.89E-09 | 1.06E-08 | no |
| RECK         | 0.224680921  | 6.087386434  | 1.89E-09 | 1.06E-08 | no |
| GANAB        | 0.224643562  | 6.08632046   | 1.91E-09 | 1.07E-08 | no |
| ADAM17       | 0.22461639   | 6.085545153  | 1.92E-09 | 1.07E-08 | no |
| FBXO48       | 0.224606323  | 6.08525792   | 1.92E-09 | 1.08E-08 | no |
| GLRB         | -0.224600697 | -6.085097401 | 1.92E-09 | 1.08E-08 | no |
| LOC644172    | -0.224571332 | -6.084259575 | 1.93E-09 | 1.08E-08 | no |
| ZNF638       | -0.22456983  | -6.084216717 | 1.93E-09 | 1.08E-08 | no |
| NPIP         | -0.224543518 | -6.083465999 | 1.94E-09 | 1.09E-08 | no |
| SLC8A3       | -0.224532774 | -6.083159448 | 1.94E-09 | 1.09E-08 | no |
| DGKI         | -0.224493579 | -6.082041211 | 1.96E-09 | 1.09E-08 | no |
| PELI3        | -0.224476482 | -6.081553426 | 1.96E-09 | 1.10E-08 | no |
| CCPG1        | 0.224368323  | 6.078467785  | 2.00E-09 | 1.12E-08 | no |
| CSNK1G1      | 0.224366662  | 6.078420401  | 2.00E-09 | 1.12E-08 | no |
| FFAR2        | 0.224335491  | 6.077531179  | 2.01E-09 | 1.12E-08 | no |
| TMEM25       | -0.224151435 | -6.072280968 | 2.07E-09 | 1.16E-08 | no |
| FDFT1        | -0.2241512   | -6.072274279 | 2.07E-09 | 1.16E-08 | no |
| ZFYVE27      | -0.223966136 | -6.06699601  | 2.14E-09 | 1.19E-08 | no |



|          |              |              |          |          |    |
|----------|--------------|--------------|----------|----------|----|
| FAM86B2  | 0.223917369  | 6.06560522   | 2.16E-09 | 1.20E-08 | no |
| MAGI1    | -0.223866433 | -6.064152639 | 2.17E-09 | 1.21E-08 | no |
| RRN3     | -0.223833686 | -6.063218772 | 2.19E-09 | 1.22E-08 | no |
| PCYT1B   | -0.223786751 | -6.061880378 | 2.20E-09 | 1.23E-08 | no |
| KIAA0430 | -0.22373138  | -6.060301431 | 2.22E-09 | 1.24E-08 | no |
| CHI3L2   | 0.223694507  | 6.05925002   | 2.24E-09 | 1.25E-08 | no |
| CCDC89   | 0.223683885  | 6.058947172  | 2.24E-09 | 1.25E-08 | no |
| PMFBP1   | 0.223658456  | 6.058222089  | 2.25E-09 | 1.25E-08 | no |
| SNX27    | -0.223611512 | -6.056883574 | 2.27E-09 | 1.26E-08 | no |
| FTH1     | 0.223529572  | 6.054547358  | 2.30E-09 | 1.28E-08 | no |
| SMAP2    | 0.223495176  | 6.053566703  | 2.31E-09 | 1.29E-08 | no |
| GDF9     | -0.223485917 | -6.053302737 | 2.32E-09 | 1.29E-08 | no |
| SSBP3    | -0.223415982 | -6.051308963 | 2.35E-09 | 1.31E-08 | no |
| PABPC4L  | 0.223391742  | 6.050617909  | 2.35E-09 | 1.31E-08 | no |
| HEY1     | -0.223387487 | -6.050496625 | 2.36E-09 | 1.31E-08 | no |
| ASCL1    | -0.223385332 | -6.050435177 | 2.36E-09 | 1.31E-08 | no |
| ARNT     | 0.223364243  | 6.049834     | 2.37E-09 | 1.32E-08 | no |
| PRKD3    | 0.223340545  | 6.049158415  | 2.38E-09 | 1.32E-08 | no |
| EPX      | -0.223329675 | -6.048848558 | 2.38E-09 | 1.32E-08 | no |
| LRRC28   | 0.223271905  | 6.047201763  | 2.40E-09 | 1.33E-08 | no |
| L3MBTL   | -0.223259397 | -6.046845227 | 2.41E-09 | 1.34E-08 | no |
| RTKN     | -0.223222261 | -6.045786655 | 2.42E-09 | 1.35E-08 | no |
| ZBTB80S  | 0.223218016  | 6.045665671  | 2.42E-09 | 1.35E-08 | no |
| POTEE    | 0.223138828  | 6.043408526  | 2.46E-09 | 1.36E-08 | no |
| VWA1     | 0.223115782  | 6.042751657  | 2.47E-09 | 1.37E-08 | no |
| SH3BP1   | 0.223077535  | 6.041661524  | 2.48E-09 | 1.38E-08 | no |
| TAP1     | 0.223068618  | 6.041407386  | 2.49E-09 | 1.38E-08 | no |
| FOXRED1  | -0.223060862 | -6.041186316 | 2.49E-09 | 1.38E-08 | no |
| SPHK1    | 0.22303398   | 6.040420157  | 2.50E-09 | 1.39E-08 | no |
| PTCRA    | 0.223000036  | 6.039452739  | 2.52E-09 | 1.39E-08 | no |
| FN3K     | -0.222921436 | -6.0372127   | 2.55E-09 | 1.41E-08 | no |
| DCUN1D3  | 0.222868319  | 6.035698985  | 2.57E-09 | 1.42E-08 | no |
| CBLN1    | -0.22279895  | -6.033722195 | 2.60E-09 | 1.44E-08 | no |
| PMP22    | 0.222743258  | 6.032135248  | 2.63E-09 | 1.45E-08 | no |
| TCEAL3   | -0.222678811 | -6.030298863 | 2.65E-09 | 1.47E-08 | no |
| ROR1     | 0.222672405  | 6.030116345  | 2.66E-09 | 1.47E-08 | no |
| SPRY1    | 0.222611813  | 6.028389899  | 2.68E-09 | 1.48E-08 | no |
| PPP1R3F  | -0.222568259 | -6.027148957 | 2.70E-09 | 1.49E-08 | no |
| LRRTM2   | -0.222556527 | -6.026814702 | 2.71E-09 | 1.50E-08 | no |
| UPF3A    | -0.222547285 | -6.026551405 | 2.71E-09 | 1.50E-08 | no |
| CCDC101  | -0.22250616  | -6.025379712 | 2.73E-09 | 1.51E-08 | no |
| LIMD2    | 0.222488232  | 6.024868961  | 2.74E-09 | 1.51E-08 | no |
| MTFR1    | 0.222466302  | 6.024244189  | 2.75E-09 | 1.52E-08 | no |
| RBP5     | 0.222393299  | 6.022164433  | 2.78E-09 | 1.54E-08 | no |
| CHD8     | -0.222366977 | -6.021414585 | 2.80E-09 | 1.54E-08 | no |
| KLF10    | 0.222300642  | 6.019524906  | 2.83E-09 | 1.56E-08 | no |
| SMCR5    | -0.222285212 | -6.019085374 | 2.84E-09 | 1.56E-08 | no |
| ALDH2    | -0.222251068 | -6.018112762 | 2.85E-09 | 1.57E-08 | no |
| FAM82A2  | -0.222234796 | -6.01764926  | 2.86E-09 | 1.58E-08 | no |
| FAM193A  | -0.222229227 | -6.017490619 | 2.86E-09 | 1.58E-08 | no |
| LYRM7    | -0.222193047 | -6.016460072 | 2.88E-09 | 1.59E-08 | no |

|           |              |              |          |          |    |
|-----------|--------------|--------------|----------|----------|----|
| TANC2     | -0.222186605 | -6.016276565 | 2.88E-09 | 1.59E-08 | no |
| C7orf25   | 0.222166482  | 6.015703412  | 2.89E-09 | 1.59E-08 | no |
| ST13      | -0.222154692 | -6.015367581 | 2.90E-09 | 1.59E-08 | no |
| ERLIN1    | 0.222085803  | 6.013405472  | 2.93E-09 | 1.61E-08 | no |
| ARHGAP17  | 0.221956619  | 6.009726254  | 3.00E-09 | 1.65E-08 | no |
| LOC400696 | 0.221912053  | 6.008457061  | 3.02E-09 | 1.66E-08 | no |
| TPBG      | 0.221857452  | 6.006902148  | 3.05E-09 | 1.67E-08 | no |
| ARFGAP3   | 0.221846321  | 6.006585165  | 3.05E-09 | 1.68E-08 | no |
| TDP2      | 0.221826424  | 6.006018559  | 3.06E-09 | 1.68E-08 | no |
| RNF208    | -0.221800096 | -6.005268852 | 3.07E-09 | 1.69E-08 | no |
| RUFY1     | 0.221753284  | 6.00393585   | 3.10E-09 | 1.70E-08 | no |
| DPP4      | 0.221750293  | 6.003850685  | 3.10E-09 | 1.70E-08 | no |
| NHLRC4    | 0.221734799  | 6.003409477  | 3.11E-09 | 1.71E-08 | no |
| FAM13C    | -0.221675834 | -6.001730526 | 3.14E-09 | 1.72E-08 | no |
| SPRN      | -0.22166619  | -6.001455923 | 3.14E-09 | 1.72E-08 | no |
| RAB3D     | 0.221606055  | 5.999743699  | 3.18E-09 | 1.74E-08 | no |
| NLN       | 0.221603293  | 5.999665058  | 3.18E-09 | 1.74E-08 | no |
| MFS5      | 0.221549231  | 5.998125844  | 3.21E-09 | 1.76E-08 | no |
| C20orf203 | -0.221516233 | -5.997186366 | 3.22E-09 | 1.77E-08 | no |
| FOXK2     | -0.221510568 | -5.997025081 | 3.23E-09 | 1.77E-08 | no |
| BIK       | 0.221443089  | 5.995103964  | 3.26E-09 | 1.79E-08 | no |
| LARS      | -0.221429665 | -5.994721821 | 3.27E-09 | 1.79E-08 | no |
| EPB41L4A  | -0.221353584 | -5.992555952 | 3.31E-09 | 1.81E-08 | no |
| SPAG1     | 0.221340451  | 5.992182078  | 3.32E-09 | 1.82E-08 | no |
| LILRB5    | 0.221333111  | 5.991973136  | 3.32E-09 | 1.82E-08 | no |
| MIPEP     | 0.221277223  | 5.990382216  | 3.35E-09 | 1.83E-08 | no |
| DDHD1     | -0.221209474 | -5.98845374  | 3.39E-09 | 1.85E-08 | no |
| DGCR6     | -0.221195807 | -5.988064721 | 3.40E-09 | 1.86E-08 | no |
| MRGPRF    | 0.221144861  | 5.986614625  | 3.43E-09 | 1.87E-08 | no |
| PREB      | 0.221104528  | 5.985466653  | 3.45E-09 | 1.89E-08 | no |
| KCND2     | -0.221064829 | -5.98433674  | 3.47E-09 | 1.90E-08 | no |
| NNMT      | 0.221050493  | 5.983928722  | 3.48E-09 | 1.90E-08 | no |
| C3orf39   | -0.221048142 | -5.983861822 | 3.48E-09 | 1.90E-08 | no |
| ALG3      | 0.221014123  | 5.982893617  | 3.50E-09 | 1.91E-08 | no |
| THTPA     | -0.220984727 | -5.982056983 | 3.52E-09 | 1.92E-08 | no |
| REEP2     | -0.220904621 | -5.979777245 | 3.57E-09 | 1.95E-08 | no |
| TCERG1    | -0.220786277 | -5.976409539 | 3.64E-09 | 1.98E-08 | no |
| DBC1      | -0.22078605  | -5.976403076 | 3.64E-09 | 1.98E-08 | no |
| PDE2A     | -0.22076253  | -5.975733786 | 3.65E-09 | 1.99E-08 | no |
| CAV2      | 0.220746806  | 5.975286354  | 3.66E-09 | 2.00E-08 | no |
| NLRP3     | 0.220732698  | 5.974884924  | 3.67E-09 | 2.00E-08 | no |
| ZFH3      | 0.220718757  | 5.97448824   | 3.68E-09 | 2.00E-08 | no |
| GARNL3    | -0.220672836 | -5.973181587 | 3.71E-09 | 2.02E-08 | no |
| LACTB2    | 0.220527611  | 5.969049629  | 3.80E-09 | 2.07E-08 | no |
| LTC4S     | 0.22052759   | 5.969049033  | 3.80E-09 | 2.07E-08 | no |
| TBL2      | 0.220505331  | 5.968415747  | 3.81E-09 | 2.07E-08 | no |
| PDPN      | 0.220498934  | 5.968233761  | 3.82E-09 | 2.08E-08 | no |
| HGS       | -0.220491325 | -5.968017261 | 3.82E-09 | 2.08E-08 | no |
| TFG       | 0.220429053  | 5.966245663  | 3.86E-09 | 2.10E-08 | no |
| SLC35A4   | 0.220391611  | 5.965180513  | 3.89E-09 | 2.11E-08 | no |
| DCLK2     | -0.22035953  | -5.964267867 | 3.91E-09 | 2.12E-08 | no |

|           |              |              |          |          |    |
|-----------|--------------|--------------|----------|----------|----|
| LOC645323 | -0.220342349 | -5.963779128 | 3.92E-09 | 2.13E-08 | no |
| NFIB      | -0.220288664 | -5.962251972 | 3.95E-09 | 2.15E-08 | no |
| SMPD2     | 0.220282548  | 5.962077979  | 3.96E-09 | 2.15E-08 | no |
| MBD1      | -0.220270034 | -5.961722009 | 3.96E-09 | 2.15E-08 | no |
| MFF       | -0.220206756 | -5.959922069 | 4.01E-09 | 2.17E-08 | no |
| ZNF777    | -0.220180648 | -5.959179466 | 4.02E-09 | 2.18E-08 | no |
| FLJ45244  | -0.220174909 | -5.959016208 | 4.03E-09 | 2.18E-08 | no |
| SLFN11    | 0.220124606  | 5.957585443  | 4.06E-09 | 2.20E-08 | no |
| YPEL4     | -0.220075948 | -5.956201496 | 4.09E-09 | 2.22E-08 | no |
| PHF10     | -0.220036355 | -5.955075398 | 4.12E-09 | 2.23E-08 | no |
| ZNF512    | -0.220013857 | -5.954435556 | 4.14E-09 | 2.24E-08 | no |
| LUC7L3    | -0.219999397 | -5.954024291 | 4.15E-09 | 2.25E-08 | no |
| PN01      | 0.219995772  | 5.953921183  | 4.15E-09 | 2.25E-08 | no |
| C9orf3    | 0.219958594  | 5.952863859  | 4.17E-09 | 2.26E-08 | no |
| PHC1      | -0.219934496 | -5.952178517 | 4.19E-09 | 2.27E-08 | no |
| LOC284441 | 0.219887552  | 5.950843495  | 4.22E-09 | 2.28E-08 | no |
| IFNAR1    | 0.219831605  | 5.949252521  | 4.26E-09 | 2.31E-08 | no |
| MOSC1     | -0.219814834 | -5.948775584 | 4.28E-09 | 2.31E-08 | no |
| PEX13     | 0.219761887  | 5.947269995  | 4.31E-09 | 2.33E-08 | no |
| RGMB      | -0.219745565 | -5.946805864 | 4.32E-09 | 2.34E-08 | no |
| RHBDL3    | -0.219722222 | -5.946142113 | 4.34E-09 | 2.34E-08 | no |
| HR        | -0.21968968  | -5.945216797 | 4.36E-09 | 2.36E-08 | no |
| ZMYND12   | 0.21963355   | 5.943620817  | 4.41E-09 | 2.38E-08 | no |
| MERTK     | 0.219624045  | 5.943350543  | 4.41E-09 | 2.38E-08 | no |
| CNDP2     | 0.219594725  | 5.942516899  | 4.43E-09 | 2.39E-08 | no |
| TASP1     | 0.219508966  | 5.940078643  | 4.50E-09 | 2.43E-08 | no |
| NDRG4     | -0.21942046  | -5.937562435 | 4.56E-09 | 2.46E-08 | no |
| RPAP3     | 0.219401804  | 5.937032065  | 4.58E-09 | 2.47E-08 | no |
| MLPH      | 0.219346718  | 5.935466086  | 4.62E-09 | 2.49E-08 | no |
| LOC650623 | -0.219331532 | -5.935034395 | 4.63E-09 | 2.49E-08 | no |
| FAM159A   | 0.21933108   | 5.935021548  | 4.63E-09 | 2.49E-08 | no |
| GRID2IP   | -0.219329634 | -5.934980436 | 4.63E-09 | 2.49E-08 | no |
| ARHGEF1   | 0.219323623  | 5.93480956   | 4.64E-09 | 2.50E-08 | no |
| RIN1      | 0.219314338  | 5.934545615  | 4.64E-09 | 2.50E-08 | no |
| SPIN2B    | -0.219304277 | -5.934259623 | 4.65E-09 | 2.50E-08 | no |
| ELAVL2    | -0.219203125 | -5.931384313 | 4.73E-09 | 2.54E-08 | no |
| AMZ1      | -0.219189611 | -5.931000173 | 4.74E-09 | 2.55E-08 | no |
| FOXRED2   | -0.219188962 | -5.930981735 | 4.74E-09 | 2.55E-08 | no |
| ARMC5     | -0.219175762 | -5.930606516 | 4.75E-09 | 2.55E-08 | no |
| PHF1      | -0.219135113 | -5.929451128 | 4.78E-09 | 2.57E-08 | no |
| POGK      | -0.219119215 | -5.928999248 | 4.80E-09 | 2.58E-08 | no |
| IFFO1     | 0.219114732  | 5.928871839  | 4.80E-09 | 2.58E-08 | no |
| BTN2A1    | 0.219084164  | 5.928003007  | 4.82E-09 | 2.59E-08 | no |
| THNSL2    | 0.219048123  | 5.926978648  | 4.85E-09 | 2.60E-08 | no |
| OAS1      | 0.219046246  | 5.926925313  | 4.85E-09 | 2.60E-08 | no |
| LOC339290 | -0.219020158 | -5.926183844 | 4.87E-09 | 2.62E-08 | no |
| RNF14     | 0.218987165  | 5.925246176  | 4.90E-09 | 2.63E-08 | no |
| RAPGEFL1  | -0.218974291 | -5.924880287 | 4.91E-09 | 2.63E-08 | no |
| BMP7      | -0.218970178 | -5.924763401 | 4.91E-09 | 2.63E-08 | no |
| NEU1      | 0.218952094  | 5.92424946   | 4.93E-09 | 2.64E-08 | no |
| HRASLS5   | 0.218933991  | 5.923734972  | 4.94E-09 | 2.65E-08 | no |

|           |              |              |          |          |    |
|-----------|--------------|--------------|----------|----------|----|
| GALR3     | -0.21892142  | -5.923377703 | 4.95E-09 | 2.65E-08 | no |
| RAPGEF4   | -0.218911637 | -5.92309968  | 4.96E-09 | 2.66E-08 | no |
| ZNF792    | 0.218897799  | 5.922706428  | 4.97E-09 | 2.66E-08 | no |
| PPM1B     | -0.218876379 | -5.9220977   | 4.99E-09 | 2.67E-08 | no |
| RAB11B    | -0.218838108 | -5.921010118 | 5.02E-09 | 2.69E-08 | no |
| GPR172B   | 0.218837438  | 5.920991092  | 5.02E-09 | 2.69E-08 | no |
| THAP10    | -0.218835602 | -5.920938903 | 5.02E-09 | 2.69E-08 | no |
| C19orf66  | 0.21881883   | 5.920462294  | 5.04E-09 | 2.69E-08 | no |
| HIPK3     | 0.218811958  | 5.920267004  | 5.04E-09 | 2.70E-08 | no |
| ZNF10     | -0.218766448 | -5.918973786 | 5.08E-09 | 2.72E-08 | no |
| MMAA      | 0.218664518  | 5.916077421  | 5.17E-09 | 2.76E-08 | no |
| CANT1     | 0.218607427  | 5.91445527   | 5.22E-09 | 2.79E-08 | no |
| HBP1      | 0.218565536  | 5.913265052  | 5.25E-09 | 2.80E-08 | no |
| LOC152225 | 0.218522835  | 5.912051822  | 5.29E-09 | 2.82E-08 | no |
| TMEM179B  | 0.218469422  | 5.910534336  | 5.34E-09 | 2.85E-08 | no |
| LARP4     | 0.218459591  | 5.910255022  | 5.34E-09 | 2.85E-08 | no |
| DTD1      | -0.218408342 | -5.908799072 | 5.39E-09 | 2.88E-08 | no |
| ITPRIPL1  | 0.218363509  | 5.907525409  | 5.43E-09 | 2.90E-08 | no |
| SLC20A1   | 0.218286353  | 5.905333623  | 5.50E-09 | 2.93E-08 | no |
| LSM11     | -0.21827358  | -5.904970768 | 5.51E-09 | 2.94E-08 | no |
| ACE       | 0.218263752  | 5.90469161   | 5.52E-09 | 2.94E-08 | no |
| LOC93622  | -0.218262178 | -5.904646895 | 5.52E-09 | 2.94E-08 | no |
| CXCL6     | 0.218221035  | 5.903478173  | 5.56E-09 | 2.96E-08 | no |
| EWSR1     | -0.218216836 | -5.903358916 | 5.56E-09 | 2.96E-08 | no |
| ARAP1     | 0.218206188  | 5.903056466  | 5.57E-09 | 2.97E-08 | no |
| PCNT      | -0.218161919 | -5.901799013 | 5.61E-09 | 2.99E-08 | no |
| SLC24A1   | 0.218145787  | 5.901340795  | 5.63E-09 | 2.99E-08 | no |
| AMD1      | 0.218082143  | 5.899533078  | 5.69E-09 | 3.02E-08 | no |
| CX3CR1    | 0.218046511  | 5.898521066  | 5.72E-09 | 3.04E-08 | no |
| TMEM168   | 0.218015775  | 5.89764811   | 5.75E-09 | 3.06E-08 | no |
| WDR78     | 0.218008434  | 5.897439602  | 5.76E-09 | 3.06E-08 | no |
| MAMDC2    | 0.218000951  | 5.897227082  | 5.76E-09 | 3.06E-08 | no |
| SLC10A6   | 0.217934332  | 5.895335057  | 5.83E-09 | 3.09E-08 | no |
| CILP      | 0.217933617  | 5.895314761  | 5.83E-09 | 3.09E-08 | no |
| HESX1     | 0.217925711  | 5.895090237  | 5.83E-09 | 3.10E-08 | no |
| ASS1      | 0.217906429  | 5.894542639  | 5.85E-09 | 3.11E-08 | no |
| ATP6VOD2  | 0.217898428  | 5.894315417  | 5.86E-09 | 3.11E-08 | no |
| CHEK2     | 0.217876226  | 5.893684906  | 5.88E-09 | 3.12E-08 | no |
| QKI       | -0.217843968 | -5.89276883  | 5.91E-09 | 3.14E-08 | no |
| UCHL3     | 0.217827253  | 5.892294153  | 5.93E-09 | 3.14E-08 | no |
| BID       | -0.217812956 | -5.891888151 | 5.94E-09 | 3.15E-08 | no |
| PPP2R5C   | -0.217802166 | -5.891581759 | 5.95E-09 | 3.15E-08 | no |
| FBXW4     | -0.217688515 | -5.888354501 | 6.06E-09 | 3.21E-08 | no |
| ABHD14A   | -0.217668135 | -5.887775798 | 6.09E-09 | 3.22E-08 | no |
| APOBEC3B  | 0.217611002  | 5.88615358   | 6.14E-09 | 3.25E-08 | no |
| TP53I13   | 0.217600609  | 5.885858469  | 6.15E-09 | 3.26E-08 | no |
| PARK2     | -0.217599596 | -5.885829703 | 6.15E-09 | 3.26E-08 | no |
| APOC4     | 0.217583302  | 5.885367068  | 6.17E-09 | 3.26E-08 | no |
| AMOTL2    | -0.217576352 | -5.885169733 | 6.18E-09 | 3.27E-08 | no |
| CSDC2     | -0.21757151  | -5.885032258 | 6.18E-09 | 3.27E-08 | no |
| ZNF843    | -0.217567583 | -5.88492078  | 6.19E-09 | 3.27E-08 | no |

|          |              |              |          |          |    |
|----------|--------------|--------------|----------|----------|----|
| FAM161B  | -0.217540679 | -5.884156887 | 6.21E-09 | 3.28E-08 | no |
| MCF2L    | -0.217529938 | -5.883851934 | 6.22E-09 | 3.29E-08 | no |
| MFAP4    | 0.217448821  | 5.881548932  | 6.31E-09 | 3.33E-08 | no |
| HAT1     | 0.217441573  | 5.88134317   | 6.31E-09 | 3.34E-08 | no |
| PCBP3    | -0.217419057 | -5.880703931 | 6.34E-09 | 3.35E-08 | no |
| ILK      | 0.217376572  | 5.879497801  | 6.38E-09 | 3.37E-08 | no |
| ZHX2     | -0.217362846 | -5.879108154 | 6.40E-09 | 3.38E-08 | no |
| LRRC2    | 0.217341194  | 5.878493464  | 6.42E-09 | 3.39E-08 | no |
| SIRT1    | -0.217340207 | -5.878465463 | 6.42E-09 | 3.39E-08 | no |
| GAD1     | -0.217295826 | -5.87720557  | 6.47E-09 | 3.41E-08 | no |
| FAM38A   | 0.217282428  | 5.87682524   | 6.48E-09 | 3.42E-08 | no |
| ZNF500   | -0.217244211 | -5.875740378 | 6.52E-09 | 3.44E-08 | no |
| C5orf32  | 0.217197467  | 5.874413517  | 6.57E-09 | 3.46E-08 | no |
| PI4K2A   | 0.217188999  | 5.874173157  | 6.58E-09 | 3.47E-08 | no |
| ACCN4    | -0.217178003 | -5.873861021 | 6.59E-09 | 3.47E-08 | no |
| RBM17    | -0.2171375   | -5.872711366 | 6.64E-09 | 3.49E-08 | no |
| DLG3     | -0.217120233 | -5.87222125  | 6.66E-09 | 3.50E-08 | no |
| SEZ6L    | -0.217103284 | -5.871740162 | 6.67E-09 | 3.51E-08 | no |
| CUEDC2   | -0.217095802 | -5.871527805 | 6.68E-09 | 3.52E-08 | no |
| E2F4     | 0.217094171  | 5.871481492  | 6.68E-09 | 3.52E-08 | no |
| C1orf66  | -0.21708398  | -5.871192259 | 6.69E-09 | 3.52E-08 | no |
| TMEM217  | 0.21706087   | 5.870536306  | 6.72E-09 | 3.53E-08 | no |
| OR10J1   | 0.217028755  | 5.869624819  | 6.76E-09 | 3.55E-08 | no |
| EID2B    | -0.217025399 | -5.869529564 | 6.76E-09 | 3.55E-08 | no |
| MLL      | -0.217009943 | -5.869090879 | 6.78E-09 | 3.56E-08 | no |
| EPHA10   | -0.216997832 | -5.868747167 | 6.79E-09 | 3.57E-08 | no |
| EFCAB5   | -0.216987872 | -5.868464492 | 6.80E-09 | 3.57E-08 | no |
| HERC2    | -0.216969073 | -5.867930946 | 6.82E-09 | 3.58E-08 | no |
| SRD5A3   | 0.216950935  | 5.867416153  | 6.84E-09 | 3.59E-08 | no |
| SIAH1    | -0.216906342 | -5.866150616 | 6.89E-09 | 3.62E-08 | no |
| LRRC27   | -0.216874041 | -5.865233921 | 6.93E-09 | 3.63E-08 | no |
| ALDH6A1  | -0.216831845 | -5.864036459 | 6.98E-09 | 3.66E-08 | no |
| BLCAP    | -0.216829574 | -5.863972009 | 6.98E-09 | 3.66E-08 | no |
| POLDIP3  | -0.216766924 | -5.862194126 | 7.05E-09 | 3.69E-08 | no |
| TBCD     | -0.216760959 | -5.862024874 | 7.06E-09 | 3.70E-08 | no |
| MTPAP    | -0.216757286 | -5.861920648 | 7.06E-09 | 3.70E-08 | no |
| TXNDC11  | 0.216748526  | 5.861672062  | 7.07E-09 | 3.70E-08 | no |
| RPRM     | -0.216747045 | -5.861630025 | 7.07E-09 | 3.70E-08 | no |
| C18orf18 | -0.216678626 | -5.859688548 | 7.15E-09 | 3.74E-08 | no |
| DGCR10   | -0.216669906 | -5.859441122 | 7.16E-09 | 3.75E-08 | no |
| PPP1R15A | 0.216644814  | 5.858729138  | 7.19E-09 | 3.76E-08 | no |
| C1orf151 | 0.216642734  | 5.858670124  | 7.19E-09 | 3.76E-08 | no |
| PRG4     | 0.216616371  | 5.857922095  | 7.22E-09 | 3.78E-08 | no |
| SPG21    | 0.216613308  | 5.857835189  | 7.23E-09 | 3.78E-08 | no |
| HEBP2    | 0.216584401  | 5.85701496   | 7.26E-09 | 3.80E-08 | no |
| RAB33A   | -0.216569098 | -5.856580776 | 7.28E-09 | 3.80E-08 | no |
| ABLIM1   | -0.216495284 | -5.854486468 | 7.37E-09 | 3.85E-08 | no |
| CCNI2    | -0.216490545 | -5.854352019 | 7.37E-09 | 3.85E-08 | no |
| RAD51L1  | 0.216472774  | 5.853847827  | 7.40E-09 | 3.86E-08 | no |
| PRKD2    | 0.216437116  | 5.852836164  | 7.44E-09 | 3.88E-08 | no |
| C1orf83  | 0.216397992  | 5.851726217  | 7.49E-09 | 3.91E-08 | no |

|           |              |              |          |          |    |
|-----------|--------------|--------------|----------|----------|----|
| FDP2L2A   | 0.21639349   | 5.851598496  | 7.49E-09 | 3.91E-08 | no |
| PRSS27    | -0.2163781   | -5.851161882 | 7.51E-09 | 3.92E-08 | no |
| ASAM      | 0.216364702  | 5.850781796  | 7.53E-09 | 3.92E-08 | no |
| TTC39C    | 0.216337238  | 5.850002642  | 7.56E-09 | 3.94E-08 | no |
| GAL3ST3   | -0.216293108 | -5.848750743 | 7.61E-09 | 3.97E-08 | no |
| RFESD     | 0.216226524  | 5.846861947  | 7.70E-09 | 4.01E-08 | no |
| PI15      | 0.216177815  | 5.845480265  | 7.76E-09 | 4.04E-08 | no |
| GTF3C1    | -0.216154245 | -5.844811669 | 7.79E-09 | 4.06E-08 | no |
| PPME1     | -0.216101912 | -5.843327266 | 7.86E-09 | 4.09E-08 | no |
| OPLAH     | 0.216080024  | 5.842706442  | 7.88E-09 | 4.10E-08 | no |
| PCDH11X   | -0.216041456 | -5.841612516 | 7.93E-09 | 4.13E-08 | no |
| TRPM8     | 0.216007781  | 5.840657401  | 7.98E-09 | 4.15E-08 | no |
| CUL9      | -0.215957184 | -5.839222345 | 8.04E-09 | 4.18E-08 | no |
| MGC12916  | 0.215909246  | 5.837862791  | 8.10E-09 | 4.21E-08 | no |
| C13orf33  | 0.215899576  | 5.837588543  | 8.12E-09 | 4.22E-08 | no |
| KBTBD11   | -0.215872397 | -5.836817752 | 8.15E-09 | 4.24E-08 | no |
| THSD1P1   | -0.2158722   | -5.836812145 | 8.15E-09 | 4.24E-08 | no |
| TRIM8     | -0.215853516 | -5.836282287 | 8.18E-09 | 4.25E-08 | no |
| MYCBPAP   | 0.215748331  | 5.833299403  | 8.32E-09 | 4.32E-08 | no |
| CXCL14    | 0.215674938  | 5.83121821   | 8.42E-09 | 4.37E-08 | no |
| LRP8      | -0.215661813 | -5.830846036 | 8.44E-09 | 4.38E-08 | no |
| SLC7A1    | -0.215661774 | -5.830844935 | 8.44E-09 | 4.38E-08 | no |
| PDZD8     | -0.21548741  | -5.825900995 | 8.68E-09 | 4.50E-08 | no |
| PA2G4     | -0.215475565 | -5.825565154 | 8.69E-09 | 4.51E-08 | no |
| EPM2AIP1  | -0.215444403 | -5.824681645 | 8.74E-09 | 4.53E-08 | no |
| UQCRB     | -0.215436518 | -5.824458088 | 8.75E-09 | 4.53E-08 | no |
| EXT2      | 0.215424808  | 5.824126109  | 8.77E-09 | 4.54E-08 | no |
| YARS2     | 0.215409064  | 5.823679733  | 8.79E-09 | 4.55E-08 | no |
| TMEM111   | 0.215353607  | 5.822107514  | 8.87E-09 | 4.59E-08 | no |
| FAM181B   | -0.21532149  | -5.821197008 | 8.91E-09 | 4.62E-08 | no |
| PLEKH01   | 0.215308877  | 5.82083944   | 8.93E-09 | 4.62E-08 | no |
| RCN1      | 0.215297062  | 5.820504488  | 8.95E-09 | 4.63E-08 | no |
| ANAPC2    | -0.215293682 | -5.820408665 | 8.95E-09 | 4.63E-08 | no |
| C15orf51  | 0.2152541    | 5.819286605  | 9.01E-09 | 4.66E-08 | no |
| COL12A1   | 0.215226957  | 5.818517159  | 9.05E-09 | 4.68E-08 | no |
| RND2      | -0.215211126 | -5.818068396 | 9.07E-09 | 4.69E-08 | no |
| SVEP1     | 0.215171672  | 5.816950003  | 9.13E-09 | 4.72E-08 | no |
| ANO10     | 0.215161324  | 5.816656675  | 9.15E-09 | 4.73E-08 | no |
| HERC5     | 0.215133918  | 5.81587981   | 9.19E-09 | 4.75E-08 | no |
| TMIGD2    | 0.215093533  | 5.814735082  | 9.25E-09 | 4.78E-08 | no |
| LAT       | 0.215078567  | 5.814310885  | 9.27E-09 | 4.79E-08 | no |
| LOC645166 | 0.215068699  | 5.814031183  | 9.29E-09 | 4.79E-08 | no |
| GIP       | 0.215039204  | 5.813195181  | 9.33E-09 | 4.81E-08 | no |
| TMEM67    | 0.215008073  | 5.812312792  | 9.38E-09 | 4.84E-08 | no |
| CAPNS1    | 0.215003753  | 5.812190351  | 9.38E-09 | 4.84E-08 | no |
| GPR137C   | -0.214980073 | -5.811519193 | 9.42E-09 | 4.86E-08 | no |
| CCDC94    | -0.214956978 | -5.810864643 | 9.46E-09 | 4.87E-08 | no |
| DUSP8     | -0.214951    | -5.810695199 | 9.46E-09 | 4.88E-08 | no |
| LRP1B     | -0.214928169 | -5.810048139 | 9.50E-09 | 4.89E-08 | no |
| C10orf54  | 0.21487006   | 5.808401247  | 9.59E-09 | 4.94E-08 | no |
| RBM10     | -0.214857671 | -5.808050125 | 9.61E-09 | 4.95E-08 | no |

|           |              |              |          |          |    |
|-----------|--------------|--------------|----------|----------|----|
| CUX2      | -0.214851751 | -5.807882361 | 9.62E-09 | 4.95E-08 | no |
| RBP1      | 0.214805829  | 5.806580936  | 9.69E-09 | 4.99E-08 | no |
| MMD2      | -0.214792004 | -5.806189138 | 9.71E-09 | 5.00E-08 | no |
| C11orf68  | -0.214771086 | -5.805596364 | 9.74E-09 | 5.01E-08 | no |
| FLJ10661  | 0.214750435  | 5.805011127  | 9.78E-09 | 5.03E-08 | no |
| DNAJB11   | 0.214749698  | 5.804990242  | 9.78E-09 | 5.03E-08 | no |
| WDR81     | 0.214749362  | 5.804980732  | 9.78E-09 | 5.03E-08 | no |
| LAMP2     | 0.214742936  | 5.804798642  | 9.79E-09 | 5.03E-08 | no |
| TOX       | -0.214710527 | -5.803880242 | 9.84E-09 | 5.06E-08 | no |
| RAB18     | -0.214708872 | -5.803833317 | 9.84E-09 | 5.06E-08 | no |
| LOC148824 | 0.214631476  | 5.801640168  | 9.96E-09 | 5.12E-08 | no |
| HTR3C     | 0.214593711  | 5.80057007   | 1.00E-08 | 5.15E-08 | no |
| SEC11A    | 0.214574148  | 5.800015743  | 1.01E-08 | 5.16E-08 | no |
| C1orf70   | -0.21451339  | -5.798294221 | 1.02E-08 | 5.21E-08 | no |
| AADAT     | -0.214510457 | -5.798211105 | 1.02E-08 | 5.21E-08 | no |
| BEX2      | -0.214495239 | -5.797779922 | 1.02E-08 | 5.22E-08 | no |
| PSENNEN   | 0.214482586  | 5.797421442  | 1.02E-08 | 5.23E-08 | no |
| PTMA      | 0.214466883  | 5.796976522  | 1.02E-08 | 5.25E-08 | no |
| DPP10     | -0.214439134 | -5.796190314 | 1.03E-08 | 5.27E-08 | no |
| SERPINB2  | 0.214437734  | 5.796150645  | 1.03E-08 | 5.27E-08 | no |
| NEU4      | -0.214411139 | -5.795397148 | 1.03E-08 | 5.29E-08 | no |
| C22orf34  | 0.214396017  | 5.794968734  | 1.04E-08 | 5.30E-08 | no |
| LRSAM1    | -0.214388666 | -5.79476046  | 1.04E-08 | 5.31E-08 | no |
| DOK4      | -0.214354636 | -5.793796343 | 1.04E-08 | 5.33E-08 | no |
| BIN3      | 0.214324901  | 5.792953941  | 1.05E-08 | 5.36E-08 | no |
| PELI2     | -0.214290452 | -5.791978019 | 1.05E-08 | 5.39E-08 | no |
| FLJ42627  | -0.214271909 | -5.79145271  | 1.06E-08 | 5.40E-08 | no |
| KIF7      | -0.214262148 | -5.791176194 | 1.06E-08 | 5.41E-08 | no |
| GNL1      | -0.214249331 | -5.790813102 | 1.06E-08 | 5.42E-08 | no |
| TCEAL4    | -0.214239639 | -5.790538522 | 1.06E-08 | 5.42E-08 | no |
| MTL5      | 0.214226721  | 5.790172589  | 1.06E-08 | 5.43E-08 | no |
| USP49     | -0.214223053 | -5.790068664 | 1.06E-08 | 5.44E-08 | no |
| ABCA13    | 0.214222708  | 5.790058906  | 1.06E-08 | 5.44E-08 | no |
| SUPT16H   | -0.214192818 | -5.78921217  | 1.07E-08 | 5.46E-08 | no |
| USP53     | 0.214179029  | 5.788821578  | 1.07E-08 | 5.47E-08 | no |
| NAA20     | 0.214174441  | 5.788691601  | 1.07E-08 | 5.47E-08 | no |
| EGFL6     | 0.214109988  | 5.786865858  | 1.08E-08 | 5.53E-08 | no |
| LOC285696 | -0.214099786 | -5.786576891 | 1.09E-08 | 5.54E-08 | no |
| FZD2      | 0.214094289  | 5.786421166  | 1.09E-08 | 5.54E-08 | no |
| RPTOR     | -0.21405457  | -5.785296111 | 1.09E-08 | 5.57E-08 | no |
| BFAR      | 0.21402645   | 5.784499619  | 1.10E-08 | 5.60E-08 | no |
| LOC643763 | -0.214024193 | -5.784435701 | 1.10E-08 | 5.60E-08 | no |
| SF4       | -0.214022134 | -5.784377375 | 1.10E-08 | 5.60E-08 | no |
| MGAT4C    | -0.213981825 | -5.783235666 | 1.11E-08 | 5.63E-08 | no |
| RNPS1     | -0.213965254 | -5.782766313 | 1.11E-08 | 5.65E-08 | no |
| NR2F2     | 0.213957939  | 5.782559122  | 1.11E-08 | 5.65E-08 | no |
| ERP29     | 0.213931121  | 5.781799558  | 1.12E-08 | 5.67E-08 | no |
| PIK3R2    | -0.213930848 | -5.781791821 | 1.12E-08 | 5.67E-08 | no |
| AGAP4     | -0.213906656 | -5.781106643 | 1.12E-08 | 5.70E-08 | no |
| TRIM58    | 0.21390265   | 5.780993187  | 1.12E-08 | 5.70E-08 | no |
| DCX       | -0.213897129 | -5.78083683  | 1.12E-08 | 5.70E-08 | no |

|           |              |              |          |          |    |
|-----------|--------------|--------------|----------|----------|----|
| FBX04     | 0.213892382  | 5.780702382  | 1.12E-08 | 5.70E-08 | no |
| IGF2R     | 0.213874452  | 5.780194565  | 1.13E-08 | 5.72E-08 | no |
| DDB1      | -0.213855239 | -5.779650434 | 1.13E-08 | 5.74E-08 | no |
| AP2S1     | 0.213798535  | 5.778044544  | 1.14E-08 | 5.79E-08 | no |
| GPR158    | -0.213788798 | -5.777768794 | 1.14E-08 | 5.79E-08 | no |
| LRRC4B    | -0.213768657 | -5.777198411 | 1.14E-08 | 5.81E-08 | no |
| ZSCAN2    | -0.213751968 | -5.776725779 | 1.15E-08 | 5.83E-08 | no |
| POMT1     | -0.213719937 | -5.775818695 | 1.15E-08 | 5.85E-08 | no |
| UBXN4     | 0.213666171  | 5.774296148  | 1.16E-08 | 5.90E-08 | no |
| RPL3      | -0.213626399 | -5.773169913 | 1.17E-08 | 5.94E-08 | no |
| POLR2F    | -0.213586885 | -5.772051015 | 1.18E-08 | 5.98E-08 | no |
| DCK       | 0.213573278  | 5.771665714  | 1.18E-08 | 5.99E-08 | no |
| POMT2     | -0.213571637 | -5.771619255 | 1.18E-08 | 5.99E-08 | no |
| SUSD2     | 0.213555526  | 5.771163058  | 1.18E-08 | 6.00E-08 | no |
| PRUNE     | 0.213550908  | 5.771032297  | 1.19E-08 | 6.00E-08 | no |
| PIH1D2    | 0.213549178  | 5.770983302  | 1.19E-08 | 6.00E-08 | no |
| UBA6      | 0.213538191  | 5.770672195  | 1.19E-08 | 6.01E-08 | no |
| ZFP37     | -0.213533202 | -5.770530928 | 1.19E-08 | 6.02E-08 | no |
| ZFP1      | -0.213447894 | -5.768115506 | 1.21E-08 | 6.10E-08 | no |
| AKTIP     | -0.21342297  | -5.767409831 | 1.21E-08 | 6.12E-08 | no |
| BHLHE40   | 0.213349146  | 5.765319678  | 1.22E-08 | 6.19E-08 | no |
| LOC150568 | -0.213341536 | -5.765104252 | 1.23E-08 | 6.20E-08 | no |
| MIER1     | 0.213307344  | 5.764136227  | 1.23E-08 | 6.23E-08 | no |
| GBF1      | -0.213289611 | -5.763634193 | 1.24E-08 | 6.25E-08 | no |
| ZNF23     | -0.213223936 | -5.761774941 | 1.25E-08 | 6.31E-08 | no |
| ANKRD23   | -0.21320776  | -5.761317017 | 1.25E-08 | 6.33E-08 | no |
| WISP1     | 0.213202999  | 5.761182239  | 1.25E-08 | 6.33E-08 | no |
| SMAD9     | -0.213145912 | -5.759566189 | 1.27E-08 | 6.39E-08 | no |
| POLR3H    | -0.213143866 | -5.759508284 | 1.27E-08 | 6.39E-08 | no |
| FAM5B     | -0.213078018 | -5.757644317 | 1.28E-08 | 6.45E-08 | no |
| PRKACA    | 0.213060745  | 5.757155383  | 1.28E-08 | 6.47E-08 | no |
| IL28RA    | 0.212989118  | 5.755127952  | 1.30E-08 | 6.54E-08 | no |
| R3HDML    | 0.212983119  | 5.754958138  | 1.30E-08 | 6.55E-08 | no |
| SUOX      | -0.212925594 | -5.75332994  | 1.31E-08 | 6.61E-08 | no |
| RPUSD4    | -0.212919345 | -5.753153082 | 1.31E-08 | 6.61E-08 | no |
| PPP1R13B  | -0.212874818 | -5.751892831 | 1.32E-08 | 6.66E-08 | no |
| TMED7     | 0.212860454  | 5.751486298  | 1.32E-08 | 6.67E-08 | no |
| DCTN6     | -0.212852712 | -5.751267168 | 1.33E-08 | 6.68E-08 | no |
| NIPAL2    | 0.21282584   | 5.750506645  | 1.33E-08 | 6.70E-08 | no |
| RAP1GAP   | -0.212825619 | -5.75050038  | 1.33E-08 | 6.70E-08 | no |
| TBX15     | 0.212750851  | 5.748384375  | 1.35E-08 | 6.78E-08 | no |
| ERN1      | 0.212736909  | 5.747989819  | 1.35E-08 | 6.79E-08 | no |
| ZNF768    | -0.212731441 | -5.747835092 | 1.35E-08 | 6.80E-08 | no |
| ZNF142    | -0.212725993 | -5.747680901 | 1.35E-08 | 6.80E-08 | no |
| C12orf26  | 0.212689014  | 5.746634427  | 1.36E-08 | 6.84E-08 | no |
| TAB2      | 0.212657795  | 5.745750958  | 1.37E-08 | 6.87E-08 | no |
| PPID      | 0.212627647  | 5.744897813  | 1.37E-08 | 6.91E-08 | no |
| CYP19A1   | 0.21258878   | 5.743797973  | 1.38E-08 | 6.95E-08 | no |
| AXIN1     | -0.212541444 | -5.74245851  | 1.39E-08 | 7.00E-08 | no |
| MS4A2     | 0.212529607  | 5.742123591  | 1.40E-08 | 7.01E-08 | no |
| HMG20A    | -0.212500892 | -5.741311057 | 1.40E-08 | 7.04E-08 | no |



|              |              |              |          |          |    |
|--------------|--------------|--------------|----------|----------|----|
| IL13RA2      | 0.212476562  | 5.740622642  | 1.41E-08 | 7.07E-08 | no |
| ALCAM        | -0.212436475 | -5.739488397 | 1.42E-08 | 7.11E-08 | no |
| CSK          | 0.21238988   | 5.738170024  | 1.43E-08 | 7.16E-08 | no |
| TECTA        | -0.212377234 | -5.737812232 | 1.43E-08 | 7.17E-08 | no |
| DZIP1        | -0.21235791  | -5.737265501 | 1.43E-08 | 7.19E-08 | no |
| PPP2R5B      | -0.212332095 | -5.736535132 | 1.44E-08 | 7.22E-08 | no |
| CRYZ         | 0.212307118  | 5.735828467  | 1.45E-08 | 7.25E-08 | no |
| SLITRK2      | -0.212306502 | -5.735811041 | 1.45E-08 | 7.25E-08 | no |
| MN1          | -0.212253353 | -5.734307383 | 1.46E-08 | 7.31E-08 | no |
| OR51E1       | 0.212251258  | 5.734248118  | 1.46E-08 | 7.31E-08 | no |
| ECSCR        | 0.212232046  | 5.733704615  | 1.46E-08 | 7.33E-08 | no |
| MCAM         | 0.212218952  | 5.733334162  | 1.47E-08 | 7.34E-08 | no |
| PPM1A        | -0.212174076 | -5.732064649 | 1.48E-08 | 7.39E-08 | no |
| AGXT2L1      | -0.212129333 | -5.730798916 | 1.49E-08 | 7.44E-08 | no |
| PLD1         | 0.211967589  | 5.726223646  | 1.53E-08 | 7.64E-08 | no |
| CCDC122      | 0.211966238  | 5.726185445  | 1.53E-08 | 7.64E-08 | no |
| LOC283761    | -0.21193599  | -5.725329877 | 1.53E-08 | 7.67E-08 | no |
| CDR2         | 0.211872873  | 5.723544643  | 1.55E-08 | 7.75E-08 | no |
| ITGA10       | 0.211754054  | 5.720184142  | 1.58E-08 | 7.89E-08 | no |
| LOC100128977 | -0.211667696 | -5.71774186  | 1.60E-08 | 8.00E-08 | no |
| THNSL1       | -0.21165174  | -5.717290655 | 1.61E-08 | 8.02E-08 | no |
| LOC168474    | -0.211591437 | -5.71558532  | 1.62E-08 | 8.09E-08 | no |
| GPLD1        | -0.211433522 | -5.71111997  | 1.66E-08 | 8.30E-08 | no |
| MRPS25       | -0.211417016 | -5.710653263 | 1.67E-08 | 8.32E-08 | no |
| C21orf62     | 0.211377994  | 5.709549932  | 1.68E-08 | 8.36E-08 | no |
| SLC43A2      | 0.211351911  | 5.708812468  | 1.68E-08 | 8.40E-08 | no |
| SERHL2       | 0.211343914  | 5.708586345  | 1.69E-08 | 8.41E-08 | no |
| SPPL3        | -0.211263152 | -5.706302955 | 1.71E-08 | 8.51E-08 | no |
| NF2          | -0.211240423 | -5.705660369 | 1.71E-08 | 8.54E-08 | no |
| MAPK8        | -0.211230318 | -5.705374686 | 1.72E-08 | 8.55E-08 | no |
| SNURF        | -0.21114753  | -5.703034194 | 1.74E-08 | 8.66E-08 | no |
| ETV1         | -0.211114968 | -5.702113689 | 1.75E-08 | 8.71E-08 | no |
| PRR24        | 0.211111627  | 5.702019225  | 1.75E-08 | 8.71E-08 | no |
| IER5L        | 0.211072369  | 5.700909431  | 1.76E-08 | 8.76E-08 | no |
| DLG5         | -0.211064147 | -5.700677011 | 1.76E-08 | 8.77E-08 | no |
| RSF1         | -0.211057971 | -5.700502428 | 1.76E-08 | 8.78E-08 | no |
| GLCCI1       | -0.211056844 | -5.700470584 | 1.76E-08 | 8.78E-08 | no |
| HHIPL2       | 0.211013931  | 5.699257508  | 1.78E-08 | 8.83E-08 | no |
| LOC729020    | 0.210964577  | 5.697862401  | 1.79E-08 | 8.90E-08 | no |
| ARRDC3       | 0.21094525   | 5.697316118  | 1.80E-08 | 8.93E-08 | no |
| SMAP1        | -0.210908707 | -5.696283186 | 1.81E-08 | 8.98E-08 | no |
| KIAA1467     | -0.210869844 | -5.695184718 | 1.82E-08 | 9.03E-08 | no |
| PLCXD2       | -0.210843266 | -5.694433502 | 1.83E-08 | 9.06E-08 | no |
| ZNF512B      | -0.21081133  | -5.693530857 | 1.83E-08 | 9.11E-08 | no |
| C8orf44      | -0.210798505 | -5.693168369 | 1.84E-08 | 9.12E-08 | no |
| ALG14        | 0.210778097  | 5.692591582  | 1.84E-08 | 9.15E-08 | no |
| IGFBP5       | 0.210772736  | 5.692440043  | 1.85E-08 | 9.16E-08 | no |
| KIAA1211     | -0.210767994 | -5.692306027 | 1.85E-08 | 9.16E-08 | no |
| C2orf58      | 0.210616603  | 5.688027487  | 1.89E-08 | 9.38E-08 | no |
| SLC35A3      | 0.210609858  | 5.687836858  | 1.89E-08 | 9.39E-08 | no |
| COL13A1      | 0.210592259  | 5.687339531  | 1.90E-08 | 9.41E-08 | no |

|              |              |              |          |          |    |
|--------------|--------------|--------------|----------|----------|----|
| KDM4D        | -0.210577123 | -5.686911785 | 1.90E-08 | 9.43E-08 | no |
| CHRM4        | -0.210569069 | -5.686684188 | 1.91E-08 | 9.44E-08 | no |
| RPL4         | -0.210472806 | -5.683963961 | 1.94E-08 | 9.59E-08 | no |
| SUPT3H       | -0.210437238 | -5.682958897 | 1.95E-08 | 9.64E-08 | no |
| DKFZP586I142 | 0.210425041  | 5.682614257  | 1.95E-08 | 9.65E-08 | no |
| PNLIPRP3     | 0.210424885  | 5.682609846  | 1.95E-08 | 9.65E-08 | no |
| ADCK1        | -0.210419838 | -5.682467224 | 1.95E-08 | 9.66E-08 | no |
| DOK6         | -0.21041651  | -5.68237319  | 1.95E-08 | 9.66E-08 | no |
| PPP1R9B      | -0.210385422 | -5.681494762 | 1.96E-08 | 9.70E-08 | no |
| IPW          | -0.210355767 | -5.680656843 | 1.97E-08 | 9.75E-08 | no |
| SH3D20       | 0.210269469  | 5.678218553  | 2.00E-08 | 9.88E-08 | no |
| FAM45A       | -0.210243016 | -5.677471152 | 2.01E-08 | 9.92E-08 | no |
| RRM2B        | 0.21023753   | 5.677316178  | 2.01E-08 | 9.92E-08 | no |
| ZNF517       | -0.210223206 | -5.676911472 | 2.01E-08 | 9.94E-08 | no |
| KIAA1161     | -0.210223176 | -5.676910627 | 2.01E-08 | 9.94E-08 | no |
| VCAM1        | 0.210207403  | 5.67646498   | 2.02E-08 | 9.96E-08 | no |
| SDF2L1       | 0.210189086  | 5.675947484  | 2.02E-08 | 9.99E-08 | no |
| PRKCE        | -0.210186127 | -5.675863911 | 2.02E-08 | 9.99E-08 | no |
| CPLX1        | -0.210158671 | -5.675088226 | 2.03E-08 | 1.00E-07 | no |
| TTC22        | 0.210148757  | 5.674808135  | 2.04E-08 | 1.00E-07 | no |
| CBLN3        | 0.210142709  | 5.674637262  | 2.04E-08 | 1.01E-07 | no |
| CPN2         | 0.210091235  | 5.673183072  | 2.06E-08 | 1.01E-07 | no |
| VANGL1       | 0.210030588  | 5.671469809  | 2.08E-08 | 1.02E-07 | no |
| SF3A1        | -0.210027399 | -5.67137973  | 2.08E-08 | 1.02E-07 | no |
| MPV17        | 0.209999497  | 5.670591522  | 2.09E-08 | 1.03E-07 | no |
| PLXNB1       | -0.209961385 | -5.669514921 | 2.10E-08 | 1.03E-07 | no |
| ARMC10       | 0.209955938  | 5.669361066  | 2.10E-08 | 1.03E-07 | no |
| AKAP11       | -0.209916817 | -5.668256002 | 2.11E-08 | 1.04E-07 | no |
| ERP27        | 0.20991247   | 5.668133199  | 2.11E-08 | 1.04E-07 | no |
| TTF1         | -0.209846063 | -5.666257441 | 2.14E-08 | 1.05E-07 | no |
| ERBB4        | -0.20984325  | -5.666177983 | 2.14E-08 | 1.05E-07 | no |
| MGAT3        | -0.209733071 | -5.663066021 | 2.17E-08 | 1.07E-07 | no |
| NEURL2       | 0.209726795  | 5.662888756  | 2.18E-08 | 1.07E-07 | no |
| HECW1        | -0.209697573 | -5.662063427 | 2.19E-08 | 1.07E-07 | no |
| C12orf72     | 0.209672832  | 5.661364683  | 2.20E-08 | 1.08E-07 | no |
| RNF166       | 0.209661342  | 5.661040163  | 2.20E-08 | 1.08E-07 | no |
| BOLA3        | 0.209660864  | 5.661026674  | 2.20E-08 | 1.08E-07 | no |
| PPP2R5A      | -0.209659545 | -5.660989415 | 2.20E-08 | 1.08E-07 | no |
| RNF157       | -0.209598689 | -5.659270753 | 2.22E-08 | 1.09E-07 | no |
| MCOLN1       | 0.209571105  | 5.658491749  | 2.23E-08 | 1.09E-07 | no |
| SGMS2        | 0.209552129  | 5.657955845  | 2.24E-08 | 1.10E-07 | no |
| USP21        | -0.209547216 | -5.65781712  | 2.24E-08 | 1.10E-07 | no |
| FLJ16779     | -0.20954362  | -5.65771556  | 2.24E-08 | 1.10E-07 | no |
| RRAGD        | -0.209522631 | -5.657122826 | 2.25E-08 | 1.10E-07 | no |
| GNG11        | 0.209465336  | 5.655504874  | 2.27E-08 | 1.11E-07 | no |
| UGGT1        | 0.209463281  | 5.655446829  | 2.27E-08 | 1.11E-07 | no |
| ZNF629       | -0.209461598 | -5.655399293 | 2.27E-08 | 1.11E-07 | no |
| ZNF701       | 0.209429549  | 5.654494285  | 2.28E-08 | 1.12E-07 | no |
| MAT1A        | 0.20942842   | 5.654462399  | 2.28E-08 | 1.12E-07 | no |
| UBQLN2       | -0.209403611 | -5.653761866 | 2.29E-08 | 1.12E-07 | no |
| PSMA1        | 0.209387037  | 5.653293846  | 2.30E-08 | 1.12E-07 | no |

|          |              |              |          |             |
|----------|--------------|--------------|----------|-------------|
| TUBGCP4  | -0.209363762 | -5.652636641 | 2.30E-08 | 1.13E-07 no |
| ASB8     | -0.20935994  | -5.652528702 | 2.31E-08 | 1.13E-07 no |
| ATP5S    | -0.209351983 | -5.652304031 | 2.31E-08 | 1.13E-07 no |
| TIGD4    | 0.209330717  | 5.65170356   | 2.32E-08 | 1.13E-07 no |
| BIVM     | -0.209282207 | -5.650333854 | 2.33E-08 | 1.14E-07 no |
| RETN     | 0.209266856  | 5.649900406  | 2.34E-08 | 1.14E-07 no |
| EIF3L    | -0.209229537 | -5.648846714 | 2.35E-08 | 1.15E-07 no |
| CLCN1    | 0.209171564  | 5.64720992   | 2.38E-08 | 1.16E-07 no |
| MEX3A    | -0.209163305 | -5.646976737 | 2.38E-08 | 1.16E-07 no |
| CACNG4   | -0.209153947 | -5.64671253  | 2.38E-08 | 1.16E-07 no |
| PODNL1   | 0.209135649  | 5.646195919  | 2.39E-08 | 1.17E-07 no |
| ENY2     | 0.209128342  | 5.645989639  | 2.39E-08 | 1.17E-07 no |
| EGFLAM   | 0.209120844  | 5.645777956  | 2.39E-08 | 1.17E-07 no |
| KCTD15   | -0.209080415 | -5.644636558 | 2.41E-08 | 1.18E-07 no |
| TTC15    | -0.209068482 | -5.644299668 | 2.41E-08 | 1.18E-07 no |
| KCNK3    | -0.209048106 | -5.643724448 | 2.42E-08 | 1.18E-07 no |
| SLC23A2  | -0.208998318 | -5.642318897 | 2.44E-08 | 1.19E-07 no |
| SULF2    | -0.208977675 | -5.641736149 | 2.45E-08 | 1.19E-07 no |
| NEGR1    | -0.20897626  | -5.641696203 | 2.45E-08 | 1.19E-07 no |
| GALNT1   | 0.208966118  | 5.641409896  | 2.45E-08 | 1.20E-07 no |
| SLC10A7  | 0.208960814  | 5.641260156  | 2.46E-08 | 1.20E-07 no |
| PCDHGC3  | -0.208957625 | -5.641170152 | 2.46E-08 | 1.20E-07 no |
| PDLIM4   | 0.20894584   | 5.640837455  | 2.46E-08 | 1.20E-07 no |
| LRRC8A   | -0.20892875  | -5.640355022 | 2.47E-08 | 1.20E-07 no |
| SRXN1    | 0.208916349  | 5.640004977  | 2.47E-08 | 1.20E-07 no |
| TM4SF1   | 0.208911875  | 5.639878664  | 2.47E-08 | 1.20E-07 no |
| ZC3H18   | -0.208886876 | -5.639173007 | 2.48E-08 | 1.21E-07 no |
| CADM4    | -0.208870731 | -5.638717265 | 2.49E-08 | 1.21E-07 no |
| SF3A2    | -0.208801422 | -5.636760876 | 2.52E-08 | 1.22E-07 no |
| PLK5P    | -0.208759019 | -5.635563997 | 2.53E-08 | 1.23E-07 no |
| STK17A   | 0.20867478   | 5.633186364  | 2.57E-08 | 1.25E-07 no |
| TMEM169  | -0.208673966 | -5.633163392 | 2.57E-08 | 1.25E-07 no |
| NSMAF    | 0.208668078  | 5.632997219  | 2.57E-08 | 1.25E-07 no |
| SLC39A7  | 0.208659382  | 5.632751787  | 2.57E-08 | 1.25E-07 no |
| TMX3     | 0.208640477  | 5.632218219  | 2.58E-08 | 1.25E-07 no |
| FBXL4    | 0.208634436  | 5.632047722  | 2.58E-08 | 1.25E-07 no |
| WDR17    | -0.208606559 | -5.631260943 | 2.60E-08 | 1.26E-07 no |
| CCNDBP1  | 0.208599285  | 5.631055639  | 2.60E-08 | 1.26E-07 no |
| ZBTB3    | -0.208595721 | -5.630955064 | 2.60E-08 | 1.26E-07 no |
| PDHX     | -0.208595024 | -5.630935386 | 2.60E-08 | 1.26E-07 no |
| MEMO1    | 0.208586511  | 5.630695139  | 2.60E-08 | 1.26E-07 no |
| VAT1     | 0.208579596  | 5.63049996   | 2.61E-08 | 1.26E-07 no |
| ZNF653   | -0.208571849 | -5.630281332 | 2.61E-08 | 1.26E-07 no |
| SLC26A11 | -0.208526997 | -5.62901553  | 2.63E-08 | 1.27E-07 no |
| CBR4     | -0.208464904 | -5.627263217 | 2.65E-08 | 1.28E-07 no |
| PTPRN2   | -0.208442863 | -5.626641235 | 2.66E-08 | 1.29E-07 no |
| PTBP2    | -0.208406956 | -5.625627933 | 2.68E-08 | 1.30E-07 no |
| MEGF11   | -0.208385795 | -5.625030803 | 2.69E-08 | 1.30E-07 no |
| MYH10    | -0.208320653 | -5.623192606 | 2.71E-08 | 1.31E-07 no |
| GOPC     | -0.208294006 | -5.62244072  | 2.73E-08 | 1.32E-07 no |
| NOTCH3   | 0.208273896  | 5.621873263  | 2.73E-08 | 1.32E-07 no |

|            |              |              |          |          |    |
|------------|--------------|--------------|----------|----------|----|
| HIST1H4H   | 0.208260811  | 5.621504058  | 2.74E-08 | 1.32E-07 | no |
| LAMC3      | 0.208102116  | 5.617026491  | 2.81E-08 | 1.36E-07 | no |
| CUX1       | -0.208013878 | -5.614537058 | 2.85E-08 | 1.38E-07 | no |
| LRFN1      | -0.207998945 | -5.614115778 | 2.85E-08 | 1.38E-07 | no |
| PARP6      | -0.207981664 | -5.61362823  | 2.86E-08 | 1.38E-07 | no |
| CREBZF     | -0.207865705 | -5.610357008 | 2.91E-08 | 1.41E-07 | no |
| KLB        | -0.207724535 | -5.606374908 | 2.98E-08 | 1.44E-07 | no |
| PTGER1     | 0.207702047  | 5.605740596  | 2.99E-08 | 1.44E-07 | no |
| VIPR2      | -0.207702043 | -5.605740504 | 2.99E-08 | 1.44E-07 | no |
| NFIL3      | 0.207688676  | 5.605363455  | 3.00E-08 | 1.44E-07 | no |
| ADCY3      | 0.207660741  | 5.604575535  | 3.01E-08 | 1.45E-07 | no |
| TAF3       | -0.207637421 | -5.603917804 | 3.02E-08 | 1.46E-07 | no |
| LOC152217  | -0.207634819 | -5.603844407 | 3.02E-08 | 1.46E-07 | no |
| HSPB11     | 0.207625551  | 5.603583008  | 3.02E-08 | 1.46E-07 | no |
| HSPA4      | 0.207603273  | 5.602954658  | 3.04E-08 | 1.46E-07 | no |
| CPZ        | 0.207519582  | 5.60059427   | 3.08E-08 | 1.48E-07 | no |
| PKNOX2     | -0.207512411 | -5.600392029 | 3.08E-08 | 1.48E-07 | no |
| SERPINA12  | 0.207505163  | 5.60018763   | 3.08E-08 | 1.48E-07 | no |
| CYLD       | 0.207490489  | 5.59977379   | 3.09E-08 | 1.49E-07 | no |
| SFMBT2     | 0.207484892  | 5.599615931  | 3.09E-08 | 1.49E-07 | no |
| C9orf86    | -0.207481002 | -5.599506235 | 3.09E-08 | 1.49E-07 | no |
| TNKS1BP1   | 0.207366232  | 5.596269587  | 3.15E-08 | 1.52E-07 | no |
| UQCRC2     | -0.207345363 | -5.595681088 | 3.16E-08 | 1.52E-07 | no |
| LPAR1      | 0.207327501  | 5.595177393  | 3.17E-08 | 1.52E-07 | no |
| ASB3       | -0.207320688 | -5.594985274 | 3.17E-08 | 1.52E-07 | no |
| FAM66C     | -0.207283161 | -5.593927047 | 3.19E-08 | 1.53E-07 | no |
| POPDC2     | 0.207275034  | 5.593697877  | 3.19E-08 | 1.53E-07 | no |
| CAMK2G     | -0.207229314 | -5.592408676 | 3.22E-08 | 1.55E-07 | no |
| IMP5       | -0.207213679 | -5.591967815 | 3.23E-08 | 1.55E-07 | no |
| KIF2A      | -0.207209477 | -5.591849335 | 3.23E-08 | 1.55E-07 | no |
| DUSP5      | 0.207196584  | 5.591485772  | 3.23E-08 | 1.55E-07 | no |
| ECM2       | 0.207156488  | 5.590355221  | 3.25E-08 | 1.56E-07 | no |
| HDAC3      | 0.207141654  | 5.589936953  | 3.26E-08 | 1.56E-07 | no |
| TAOK3      | -0.207132992 | -5.589692723 | 3.27E-08 | 1.57E-07 | no |
| RPS2P32    | 0.207125405  | 5.589478814  | 3.27E-08 | 1.57E-07 | no |
| C17orf51   | -0.207104797 | -5.588897762 | 3.28E-08 | 1.57E-07 | no |
| CUEDC1     | -0.207094236 | -5.588599973 | 3.29E-08 | 1.57E-07 | no |
| FADS2      | -0.207075826 | -5.588080908 | 3.30E-08 | 1.58E-07 | no |
| TBX18      | 0.207065937  | 5.587802088  | 3.30E-08 | 1.58E-07 | no |
| CTNND2     | -0.207006018 | -5.58611275  | 3.33E-08 | 1.60E-07 | no |
| TCF4       | -0.207004198 | -5.586061435 | 3.33E-08 | 1.60E-07 | no |
| KCNJ11     | -0.206987751 | -5.585597739 | 3.34E-08 | 1.60E-07 | no |
| NCRNA00152 | 0.20694377   | 5.584357805  | 3.36E-08 | 1.61E-07 | no |
| ZNF319     | -0.206937138 | -5.584170817 | 3.37E-08 | 1.61E-07 | no |
| IL17D      | -0.206920415 | -5.58369936  | 3.38E-08 | 1.61E-07 | no |
| LPIN3      | 0.206905487  | 5.583278521  | 3.38E-08 | 1.62E-07 | no |
| INTS10     | 0.206874413  | 5.5824025    | 3.40E-08 | 1.63E-07 | no |
| CNN3       | 0.206856059  | 5.581885107  | 3.41E-08 | 1.63E-07 | no |
| LOC728264  | 0.206850216  | 5.581720392  | 3.41E-08 | 1.63E-07 | no |
| EYA1       | -0.206822945 | -5.580951589 | 3.43E-08 | 1.64E-07 | no |
| C10orf88   | -0.20682072  | -5.580888883 | 3.43E-08 | 1.64E-07 | no |

|           |              |              |          |             |
|-----------|--------------|--------------|----------|-------------|
| TAS2R40   | 0.206778995  | 5.579712659  | 3.45E-08 | 1.65E-07 no |
| EEF1A1P9  | -0.206773503 | -5.579557865 | 3.45E-08 | 1.65E-07 no |
| PNPLA4    | 0.206766547  | 5.579361761  | 3.46E-08 | 1.65E-07 no |
| BCAP31    | 0.20674228   | 5.578677722  | 3.47E-08 | 1.66E-07 no |
| FOLR3     | 0.206734312  | 5.578453104  | 3.47E-08 | 1.66E-07 no |
| PSIP1     | -0.206711584 | -5.577812454 | 3.49E-08 | 1.66E-07 no |
| ATO8H     | -0.206674519 | -5.576767658 | 3.51E-08 | 1.67E-07 no |
| TRIM9     | -0.2066551   | -5.576220306 | 3.52E-08 | 1.68E-07 no |
| NPHP1     | 0.206654719  | 5.576209547  | 3.52E-08 | 1.68E-07 no |
| GTF2IP1   | -0.206644948 | -5.575934135 | 3.52E-08 | 1.68E-07 no |
| ANXA5     | 0.206635706  | 5.575673652  | 3.53E-08 | 1.68E-07 no |
| USP34     | -0.20663565  | -5.575672071 | 3.53E-08 | 1.68E-07 no |
| RIMS4     | -0.206625115 | -5.57537512  | 3.53E-08 | 1.68E-07 no |
| LOC646762 | -0.20661501  | -5.575090302 | 3.54E-08 | 1.69E-07 no |
| ZNF830    | -0.206611736 | -5.574998027 | 3.54E-08 | 1.69E-07 no |
| PSMA3     | 0.206597427  | 5.5745947    | 3.55E-08 | 1.69E-07 no |
| AKT3      | -0.206590872 | -5.574409954 | 3.55E-08 | 1.69E-07 no |
| GEM       | 0.206565874  | 5.573705354  | 3.57E-08 | 1.70E-07 no |
| FAM196B   | -0.20653437  | -5.572817423 | 3.58E-08 | 1.70E-07 no |
| AFF2      | -0.206517242 | -5.572334687 | 3.59E-08 | 1.71E-07 no |
| ARAF      | 0.206505223  | 5.571995929  | 3.60E-08 | 1.71E-07 no |
| EPS15L1   | -0.206453937 | -5.570550481 | 3.63E-08 | 1.72E-07 no |
| GNA14     | 0.20644851   | 5.570397544  | 3.63E-08 | 1.73E-07 no |
| DIS3L2    | -0.206437753 | -5.570094382 | 3.64E-08 | 1.73E-07 no |
| RHOF      | 0.206437505  | 5.570087387  | 3.64E-08 | 1.73E-07 no |
| CCNG1     | 0.206417661  | 5.569528115  | 3.65E-08 | 1.73E-07 no |
| C8orf48   | 0.206413699  | 5.569416452  | 3.65E-08 | 1.73E-07 no |
| TREM1     | 0.20638341   | 5.568562847  | 3.67E-08 | 1.74E-07 no |
| HEATR2    | 0.206353986  | 5.567733632  | 3.69E-08 | 1.75E-07 no |
| GUCA1B    | -0.206324826 | -5.566911866 | 3.70E-08 | 1.76E-07 no |
| RTN4R     | -0.206298162 | -5.56616045  | 3.72E-08 | 1.76E-07 no |
| CDAN1     | -0.206276011 | -5.565536233 | 3.73E-08 | 1.77E-07 no |
| DIAPH1    | 0.206255576  | 5.56496037   | 3.74E-08 | 1.77E-07 no |
| DYX1C1    | 0.206209396  | 5.56365907   | 3.77E-08 | 1.79E-07 no |
| HINFP     | -0.206158818 | -5.56223384  | 3.80E-08 | 1.80E-07 no |
| DDX6      | -0.206150125 | -5.561988909 | 3.80E-08 | 1.80E-07 no |
| SEC14L3   | 0.206147216  | 5.56190693   | 3.81E-08 | 1.80E-07 no |
| GINS4     | 0.206141261  | 5.561739147  | 3.81E-08 | 1.80E-07 no |
| PLXNC1    | 0.206079787  | 5.560006987  | 3.84E-08 | 1.82E-07 no |
| NXPH1     | -0.20606959  | -5.559719672 | 3.85E-08 | 1.82E-07 no |
| CREBBP    | -0.20606099  | -5.559477347 | 3.86E-08 | 1.82E-07 no |
| LIPC      | 0.206026292  | 5.558499704  | 3.88E-08 | 1.83E-07 no |
| ASCC1     | -0.205995925 | -5.557644092 | 3.90E-08 | 1.84E-07 no |
| SYT3      | -0.205950983 | -5.556377879 | 3.92E-08 | 1.85E-07 no |
| 4-Mar     | -0.205870293 | -5.554104579 | 3.97E-08 | 1.88E-07 no |
| ZBTB44    | -0.205807892 | -5.552346598 | 4.01E-08 | 1.90E-07 no |
| KCNC1     | -0.205752766 | -5.550793639 | 4.04E-08 | 1.91E-07 no |
| RUNX1T1   | -0.205743914 | -5.550544275 | 4.05E-08 | 1.91E-07 no |
| C21orf7   | 0.205743909  | 5.55054414   | 4.05E-08 | 1.91E-07 no |
| QSOX1     | 0.205738101  | 5.550380539  | 4.05E-08 | 1.91E-07 no |
| PRKCA     | -0.205633277 | -5.54742771  | 4.12E-08 | 1.94E-07 no |

|             |              |              |          |          |    |
|-------------|--------------|--------------|----------|----------|----|
| SLC39A4     | 0.205626363  | 5.547232942  | 4.12E-08 | 1.95E-07 | no |
| GSTO1       | 0.205571526  | 5.545688318  | 4.16E-08 | 1.96E-07 | no |
| FAM22D      | -0.205569789 | -5.545639383 | 4.16E-08 | 1.96E-07 | no |
| GNAI3       | 0.20556249   | 5.5454338    | 4.16E-08 | 1.96E-07 | no |
| C5orf36     | 0.205545499  | 5.544955202  | 4.18E-08 | 1.97E-07 | no |
| PSMD12      | 0.205453739  | 5.542370698  | 4.23E-08 | 2.00E-07 | no |
| ODF3L1      | 0.205451931  | 5.542319769  | 4.24E-08 | 2.00E-07 | no |
| PSMA5       | 0.20543282   | 5.541781518  | 4.25E-08 | 2.00E-07 | no |
| CAMK2D      | 0.205432558  | 5.54177413   | 4.25E-08 | 2.00E-07 | no |
| FAM129B     | 0.205432318  | 5.541767376  | 4.25E-08 | 2.00E-07 | no |
| FAM7A2      | 0.205413181  | 5.541228401  | 4.26E-08 | 2.01E-07 | no |
| TMC4        | 0.205400583  | 5.540873568  | 4.27E-08 | 2.01E-07 | no |
| CYYR1       | 0.205348958  | 5.539419624  | 4.30E-08 | 2.03E-07 | no |
| PPP1R10     | -0.205348567 | -5.539408629 | 4.30E-08 | 2.03E-07 | no |
| SSTR5       | -0.205311564 | -5.538366495 | 4.33E-08 | 2.04E-07 | no |
| RGS11       | -0.205310861 | -5.538346717 | 4.33E-08 | 2.04E-07 | no |
| RP1-177G6.2 | -0.205272951 | -5.537279083 | 4.35E-08 | 2.05E-07 | no |
| TGDS        | 0.205269672  | 5.537186735  | 4.36E-08 | 2.05E-07 | no |
| NCRNA00081  | -0.205253001 | -5.536717254 | 4.37E-08 | 2.05E-07 | no |
| SCN3B       | -0.205211975 | -5.535561912 | 4.40E-08 | 2.07E-07 | no |
| C19orf76    | 0.205172697  | 5.534455837  | 4.42E-08 | 2.08E-07 | no |
| MVD         | -0.205168164 | -5.534328182 | 4.43E-08 | 2.08E-07 | no |
| TCP10L      | -0.205150478 | -5.533830155 | 4.44E-08 | 2.08E-07 | no |
| SLC25A32    | 0.205117715  | 5.532907558  | 4.46E-08 | 2.09E-07 | no |
| CLPTM1L     | 0.205080932  | 5.531871793  | 4.49E-08 | 2.10E-07 | no |
| LPPR5       | -0.205072169 | -5.531625061 | 4.49E-08 | 2.11E-07 | no |
| OPCML       | -0.205063288 | -5.531374983 | 4.50E-08 | 2.11E-07 | no |
| GRID2       | -0.20505964  | -5.531272257 | 4.50E-08 | 2.11E-07 | no |
| GPATCH8     | -0.205002117 | -5.529652566 | 4.54E-08 | 2.13E-07 | no |
| GLCE        | 0.204990599  | 5.529328241  | 4.55E-08 | 2.13E-07 | no |
| SOX4        | -0.204935301 | -5.52777126  | 4.59E-08 | 2.15E-07 | no |
| C10orf50    | 0.204919052  | 5.527313752  | 4.60E-08 | 2.15E-07 | no |
| RBM7        | 0.204896781  | 5.526686708  | 4.61E-08 | 2.16E-07 | no |
| GPR125      | -0.204874097 | -5.526048049 | 4.63E-08 | 2.17E-07 | no |
| C1orf212    | 0.204857815  | 5.525589642  | 4.64E-08 | 2.17E-07 | no |
| LSS         | -0.204854232 | -5.525488767 | 4.64E-08 | 2.17E-07 | no |
| ODF3B       | 0.204827631  | 5.52473982   | 4.66E-08 | 2.18E-07 | no |
| LOC645676   | -0.204823619 | -5.524626868 | 4.67E-08 | 2.18E-07 | no |
| CER1        | 0.204811188  | 5.524276891  | 4.68E-08 | 2.19E-07 | no |
| ZCCHC18     | -0.204798353 | -5.523915562 | 4.68E-08 | 2.19E-07 | no |
| PSEN2       | 0.204796703  | 5.523869099  | 4.69E-08 | 2.19E-07 | no |
| SEC31B      | -0.204788494 | -5.523637981 | 4.69E-08 | 2.19E-07 | no |
| CCDC23      | 0.204787965  | 5.52362311   | 4.69E-08 | 2.19E-07 | no |
| FAM22A      | -0.204738487 | -5.522230166 | 4.73E-08 | 2.21E-07 | no |
| TMEM45A     | 0.20471067   | 5.521447066  | 4.75E-08 | 2.22E-07 | no |
| GUF1        | -0.204702862 | -5.521227252 | 4.75E-08 | 2.22E-07 | no |
| C1orf97     | 0.204695426  | 5.521017906  | 4.76E-08 | 2.22E-07 | no |
| JAZF1       | 0.204692184  | 5.520926661  | 4.76E-08 | 2.22E-07 | no |
| SRC         | -0.204678283 | -5.520535317 | 4.77E-08 | 2.23E-07 | no |
| TAF1C       | -0.204674867 | -5.520439153 | 4.77E-08 | 2.23E-07 | no |
| RAB41       | -0.204670369 | -5.520312521 | 4.78E-08 | 2.23E-07 | no |

|           |              |              |          |             |
|-----------|--------------|--------------|----------|-------------|
| PDCD6IP   | 0.204668061  | 5.520247551  | 4.78E-08 | 2.23E-07 no |
| CKAP5     | -0.204664935 | -5.520159548 | 4.78E-08 | 2.23E-07 no |
| VAMP7     | 0.204638601  | 5.519418252  | 4.80E-08 | 2.24E-07 no |
| FGD1      | -0.204584987 | -5.51790901  | 4.84E-08 | 2.26E-07 no |
| ADAM32    | 0.204544336  | 5.51676473   | 4.87E-08 | 2.27E-07 no |
| HSF2BP    | -0.20448537  | -5.515104931 | 4.91E-08 | 2.29E-07 no |
| IL3RA     | 0.204442747  | 5.51390523   | 4.95E-08 | 2.30E-07 no |
| CNFN      | 0.204407104  | 5.512901993  | 4.97E-08 | 2.32E-07 no |
| ZXDC      | -0.204380922 | -5.512165063 | 4.99E-08 | 2.32E-07 no |
| KIF13A    | -0.204377978 | -5.512082216 | 5.00E-08 | 2.33E-07 no |
| DOCK3     | -0.204367314 | -5.511782067 | 5.00E-08 | 2.33E-07 no |
| NOP10     | 0.204360614  | 5.511593507  | 5.01E-08 | 2.33E-07 no |
| C3orf18   | -0.204307852 | -5.510108513 | 5.05E-08 | 2.35E-07 no |
| C14orf119 | 0.204301044  | 5.509916907  | 5.06E-08 | 2.35E-07 no |
| CMTM5     | -0.204272067 | -5.509101374 | 5.08E-08 | 2.36E-07 no |
| C18orf8   | 0.204261317  | 5.508798844  | 5.09E-08 | 2.36E-07 no |
| DNAJC1    | 0.204232436  | 5.507986017  | 5.11E-08 | 2.37E-07 no |
| ZER1      | -0.204127683 | -5.505038051 | 5.19E-08 | 2.41E-07 no |
| RIMS2     | -0.20412096  | -5.504848854 | 5.20E-08 | 2.41E-07 no |
| FMR1      | -0.204115547 | -5.504696532 | 5.20E-08 | 2.42E-07 no |
| FGF9      | -0.204089611 | -5.503966683 | 5.22E-08 | 2.42E-07 no |
| KIAA1143  | -0.204032856 | -5.502369584 | 5.27E-08 | 2.44E-07 no |
| LOC80154  | -0.204032399 | -5.502356739 | 5.27E-08 | 2.44E-07 no |
| PHF6      | -0.204022051 | -5.502065537 | 5.28E-08 | 2.45E-07 no |
| SCARA5    | 0.204016221  | 5.501901489  | 5.28E-08 | 2.45E-07 no |
| TPM1      | 0.20394064   | 5.499774741  | 5.34E-08 | 2.48E-07 no |
| SMS       | 0.203920099  | 5.49919677   | 5.36E-08 | 2.48E-07 no |
| TAGLN     | 0.20390201   | 5.498687797  | 5.37E-08 | 2.49E-07 no |
| LRRC8E    | 0.20386735   | 5.497712587  | 5.40E-08 | 2.50E-07 no |
| DNASE1L2  | -0.203798229 | -5.495767803 | 5.46E-08 | 2.53E-07 no |
| SNX17     | 0.203783619  | 5.495356734  | 5.47E-08 | 2.53E-07 no |
| NIP7      | 0.203782455  | 5.495323993  | 5.47E-08 | 2.53E-07 no |
| RHOJ      | 0.203769612  | 5.494962659  | 5.48E-08 | 2.54E-07 no |
| KIR2DL3   | 0.203754304  | 5.494531963  | 5.50E-08 | 2.54E-07 no |
| DZIP3     | -0.203740807 | -5.494152244 | 5.51E-08 | 2.55E-07 no |
| CUBN      | 0.20369914   | 5.49297998   | 5.54E-08 | 2.56E-07 no |
| OAT       | -0.203689995 | -5.492722713 | 5.55E-08 | 2.57E-07 no |
| UBE2A     | 0.203662915  | 5.491960877  | 5.57E-08 | 2.58E-07 no |
| LPPR3     | -0.203637207 | -5.491237625 | 5.60E-08 | 2.59E-07 no |
| GRRP1     | 0.203624903  | 5.490891481  | 5.61E-08 | 2.59E-07 no |
| MAGED1    | -0.203614289 | -5.49059289  | 5.62E-08 | 2.60E-07 no |
| ANKRD28   | -0.203606952 | -5.490386489 | 5.62E-08 | 2.60E-07 no |
| CUL1      | 0.203603311  | 5.490284056  | 5.62E-08 | 2.60E-07 no |
| KIAA0182  | -0.203580816 | -5.489651237 | 5.64E-08 | 2.61E-07 no |
| UPRT      | 0.203528634  | 5.488183327  | 5.69E-08 | 2.63E-07 no |
| CKMT1B    | -0.203527033 | -5.488138274 | 5.69E-08 | 2.63E-07 no |
| POFUT1    | 0.203487497  | 5.487026125  | 5.73E-08 | 2.64E-07 no |
| EPHA3     | 0.203477916  | 5.48675662   | 5.73E-08 | 2.65E-07 no |
| WDR77     | 0.203380067  | 5.484004275  | 5.82E-08 | 2.68E-07 no |
| OTUD4     | 0.20336356   | 5.483539974  | 5.83E-08 | 2.69E-07 no |
| ITGA3     | 0.203327961  | 5.482538672  | 5.87E-08 | 2.70E-07 no |

|              |              |              |          |          |    |
|--------------|--------------|--------------|----------|----------|----|
| ENDOD1       | 0.203281061  | 5.481219519  | 5.91E-08 | 2.72E-07 | no |
| SERF2        | 0.203257059  | 5.480544445  | 5.93E-08 | 2.73E-07 | no |
| SC5DL        | -0.203252811 | -5.480424968 | 5.93E-08 | 2.73E-07 | no |
| DNAJB7       | -0.203227433 | -5.479711224 | 5.96E-08 | 2.74E-07 | no |
| C12orf24     | -0.20318664  | -5.478563923 | 5.99E-08 | 2.76E-07 | no |
| SLC16A14     | -0.203142842 | -5.477332164 | 6.03E-08 | 2.78E-07 | no |
| CD101        | 0.203073628  | 5.475385644  | 6.10E-08 | 2.81E-07 | no |
| SH2D1B       | 0.203049113  | 5.474696256  | 6.12E-08 | 2.82E-07 | no |
| MTERFD3      | -0.203028955 | -5.474129359 | 6.14E-08 | 2.82E-07 | no |
| APPBP2       | -0.203015146 | -5.473741035 | 6.15E-08 | 2.83E-07 | no |
| AGPHD1       | 0.202965844  | 5.472354633  | 6.20E-08 | 2.85E-07 | no |
| USP47        | -0.202965098 | -5.472333656 | 6.20E-08 | 2.85E-07 | no |
| LOC100129387 | -0.202952976 | -5.471992764 | 6.21E-08 | 2.86E-07 | no |
| CCRN4L       | 0.202929602  | 5.471335496  | 6.23E-08 | 2.86E-07 | no |
| SLC25A18     | -0.202857451 | -5.469306672 | 6.30E-08 | 2.90E-07 | no |
| STK32C       | -0.202843939 | -5.468926755 | 6.31E-08 | 2.90E-07 | no |
| PYROXD2      | 0.20280688   | 5.467884716  | 6.35E-08 | 2.92E-07 | no |
| CCNB1IP1     | -0.202786859 | -5.467321782 | 6.37E-08 | 2.92E-07 | no |
| SFRS8        | -0.202778148 | -5.46707687  | 6.38E-08 | 2.93E-07 | no |
| LOC100128640 | -0.202717576 | -5.465373777 | 6.44E-08 | 2.95E-07 | no |
| PON1         | -0.20267526  | -5.464184061 | 6.48E-08 | 2.97E-07 | no |
| ATG9A        | -0.202639195 | -5.463170096 | 6.51E-08 | 2.99E-07 | no |
| SPATA12      | 0.202597124  | 5.461987302  | 6.56E-08 | 3.01E-07 | no |
| ZSCAN29      | -0.202553712 | -5.460766831 | 6.60E-08 | 3.03E-07 | no |
| ANXA2P3      | 0.202540807  | 5.460404051  | 6.61E-08 | 3.03E-07 | no |
| ATG2A        | -0.202508572 | -5.459497845 | 6.64E-08 | 3.05E-07 | no |
| PGGT1B       | 0.202498723  | 5.45922097   | 6.65E-08 | 3.05E-07 | no |
| NOLC1        | -0.202492325 | -5.459041092 | 6.66E-08 | 3.05E-07 | no |
| IGJ          | 0.20248207   | 5.458752821  | 6.67E-08 | 3.06E-07 | no |
| P4HA1        | 0.202469435  | 5.458397623  | 6.68E-08 | 3.06E-07 | no |
| TMEM69       | 0.202457467  | 5.458061187  | 6.70E-08 | 3.07E-07 | no |
| C5orf43      | 0.2024521    | 5.45791032   | 6.70E-08 | 3.07E-07 | no |
| GPRC5D       | 0.202427999  | 5.457232807  | 6.73E-08 | 3.08E-07 | no |
| ENTHD1       | 0.202423397  | 5.457103436  | 6.73E-08 | 3.08E-07 | no |
| MCTP2        | 0.202417417  | 5.456935334  | 6.74E-08 | 3.08E-07 | no |
| MYO9B        | 0.202389384  | 5.456147318  | 6.77E-08 | 3.09E-07 | no |
| IMMT         | 0.202343841  | 5.454867133  | 6.81E-08 | 3.12E-07 | no |
| FAM69C       | -0.202326541 | -5.454380828 | 6.83E-08 | 3.12E-07 | no |
| ME2          | 0.202324125  | 5.454312922  | 6.83E-08 | 3.12E-07 | no |
| SSR1         | 0.202302068  | 5.453692941  | 6.86E-08 | 3.13E-07 | no |
| DNAJB5       | -0.202287594 | -5.453286081 | 6.87E-08 | 3.14E-07 | no |
| SLC25A39     | 0.202274924  | 5.45292997   | 6.88E-08 | 3.14E-07 | no |
| ACVR2A       | -0.202267617 | -5.452724575 | 6.89E-08 | 3.15E-07 | no |
| USP46        | -0.202255249 | -5.452376935 | 6.91E-08 | 3.15E-07 | no |
| KCNIP2       | -0.202252445 | -5.452298128 | 6.91E-08 | 3.15E-07 | no |
| HORMAD2      | 0.202224992  | 5.451526487  | 6.94E-08 | 3.17E-07 | no |
| XPNPEP2      | 0.202204042  | 5.450937652  | 6.96E-08 | 3.17E-07 | no |
| BHLHE41      | 0.202196493  | 5.450725475  | 6.97E-08 | 3.18E-07 | no |
| ADAMTS13     | -0.202183288 | -5.450354326 | 6.98E-08 | 3.18E-07 | no |
| TUBGCP6      | -0.202181577 | -5.450306221 | 6.98E-08 | 3.18E-07 | no |
| ABCC8        | -0.202138167 | -5.449086153 | 7.03E-08 | 3.20E-07 | no |



|          |              |              |          |          |    |
|----------|--------------|--------------|----------|----------|----|
| BTBD17   | -0.202126253 | -5.448751302 | 7.04E-08 | 3.21E-07 | no |
| CEP110   | 0.202094249  | 5.447851831  | 7.08E-08 | 3.22E-07 | no |
| NAV1     | -0.202093233 | -5.447823281 | 7.08E-08 | 3.22E-07 | no |
| DPT      | 0.202083201  | 5.447541321  | 7.09E-08 | 3.23E-07 | no |
| RDH14    | 0.202054189  | 5.446725966  | 7.12E-08 | 3.24E-07 | no |
| NAA50    | 0.202026959  | 5.445960687  | 7.15E-08 | 3.25E-07 | no |
| SLC47A2  | 0.201960948  | 5.444105571  | 7.22E-08 | 3.29E-07 | no |
| RAB3C    | -0.201938372 | -5.443471136 | 7.24E-08 | 3.30E-07 | no |
| FEZ2     | 0.201928044  | 5.443180909  | 7.26E-08 | 3.30E-07 | no |
| TBRG1    | -0.201869101 | -5.44152451  | 7.32E-08 | 3.33E-07 | no |
| PLEKHG7  | 0.201853591  | 5.441088695  | 7.34E-08 | 3.34E-07 | no |
| SLC2A13  | -0.201797949 | -5.439525127 | 7.40E-08 | 3.36E-07 | no |
| PAIP1    | -0.201757109 | -5.438377572 | 7.45E-08 | 3.38E-07 | no |
| ZMYND15  | 0.201719392  | 5.437317765  | 7.49E-08 | 3.40E-07 | no |
| SPACA3   | 0.201688081  | 5.43643799   | 7.52E-08 | 3.42E-07 | no |
| NUDT18   | 0.201629698  | 5.434797609  | 7.59E-08 | 3.45E-07 | no |
| SSTR2    | -0.20158607  | -5.433571827 | 7.64E-08 | 3.47E-07 | no |
| OXA1L    | 0.201574551  | 5.433248184  | 7.65E-08 | 3.47E-07 | no |
| FOXO3    | -0.201555822 | -5.432721978 | 7.68E-08 | 3.48E-07 | no |
| FBXW12   | -0.20154713  | -5.432477789 | 7.69E-08 | 3.49E-07 | no |
| PHF17    | -0.201531482 | -5.43203814  | 7.70E-08 | 3.50E-07 | no |
| CYP2E1   | -0.20152406  | -5.431829642 | 7.71E-08 | 3.50E-07 | no |
| WBSCR27  | 0.201515522  | 5.431589754  | 7.72E-08 | 3.50E-07 | no |
| NFKBIL1  | -0.201515386 | -5.431585941 | 7.72E-08 | 3.50E-07 | no |
| C17orf68 | -0.20149961  | -5.431142732 | 7.74E-08 | 3.51E-07 | no |
| IARS2    | 0.201453918  | 5.429859044  | 7.80E-08 | 3.53E-07 | no |
| R3HDM2   | -0.201422247 | -5.428969326 | 7.83E-08 | 3.55E-07 | no |
| FAM123A  | -0.201383851 | -5.427890683 | 7.88E-08 | 3.57E-07 | no |
| TAF4     | -0.201362213 | -5.427282809 | 7.90E-08 | 3.58E-07 | no |
| BATF3    | 0.201317792  | 5.426034973  | 7.96E-08 | 3.60E-07 | no |
| ACSL6    | -0.201306356 | -5.425713705 | 7.97E-08 | 3.61E-07 | no |
| CIAO1    | -0.201284134 | -5.425089484 | 8.00E-08 | 3.62E-07 | no |
| KLC1     | -0.201274923 | -5.424830741 | 8.01E-08 | 3.62E-07 | no |
| MED18    | 0.201247555  | 5.424061964  | 8.04E-08 | 3.64E-07 | no |
| PPP1CA   | 0.201207879  | 5.422947501  | 8.09E-08 | 3.66E-07 | no |
| SLC41A2  | 0.201173817  | 5.421990734  | 8.13E-08 | 3.68E-07 | no |
| ZDHHC19  | 0.201165857  | 5.421767154  | 8.14E-08 | 3.68E-07 | no |
| ATAD1    | -0.201157407 | -5.421529809 | 8.15E-08 | 3.68E-07 | no |
| SLC2A11  | -0.201157129 | -5.421522    | 8.15E-08 | 3.68E-07 | no |
| MCF2     | -0.201151888 | -5.421374797 | 8.16E-08 | 3.69E-07 | no |
| C1orf112 | 0.20112917   | 5.420736671  | 8.19E-08 | 3.70E-07 | no |
| CAPN5    | 0.201050111  | 5.418516142  | 8.29E-08 | 3.74E-07 | no |
| ZNF33A   | -0.200881084 | -5.41376904  | 8.50E-08 | 3.84E-07 | no |
| PDXP     | -0.200834674 | -5.412465714 | 8.56E-08 | 3.86E-07 | no |
| AADAC    | 0.200828789  | 5.412300456  | 8.57E-08 | 3.86E-07 | no |
| TNRC6B   | -0.200802707 | -5.411568023 | 8.60E-08 | 3.88E-07 | no |
| CHRAC1   | 0.200794811  | 5.411346276  | 8.61E-08 | 3.88E-07 | no |
| EPHX3    | 0.200777261  | 5.410853454  | 8.63E-08 | 3.89E-07 | no |
| TNKS     | -0.200724946 | -5.409384374 | 8.70E-08 | 3.92E-07 | no |
| MANEA    | 0.200710343  | 5.408974334  | 8.72E-08 | 3.93E-07 | no |
| POLL     | -0.200658707 | -5.407524393 | 8.79E-08 | 3.96E-07 | no |

|           |              |              |          |             |
|-----------|--------------|--------------|----------|-------------|
| SOS2      | -0.200620168 | -5.40644224  | 8.84E-08 | 3.98E-07 no |
| SVOP      | -0.200604766 | -5.40600978  | 8.86E-08 | 3.99E-07 no |
| CLGN      | -0.200563352 | -5.404846959 | 8.92E-08 | 4.01E-07 no |
| PTCH1     | -0.200530756 | -5.403931744 | 8.96E-08 | 4.03E-07 no |
| GLRX5     | -0.200522902 | -5.403711209 | 8.97E-08 | 4.04E-07 no |
| APLNR     | 0.200511785  | 5.403399087  | 8.98E-08 | 4.04E-07 no |
| ADAM10    | 0.200484711  | 5.402638955  | 9.02E-08 | 4.06E-07 no |
| MYH7B     | -0.20047953  | -5.402493492 | 9.03E-08 | 4.06E-07 no |
| FKBP7     | 0.200475676  | 5.402385265  | 9.03E-08 | 4.06E-07 no |
| ELL2      | 0.200468843  | 5.402193438  | 9.04E-08 | 4.07E-07 no |
| RHBDL1    | -0.200357297 | -5.399061748 | 9.20E-08 | 4.13E-07 no |
| FAM18B    | 0.200351641  | 5.398902968  | 9.20E-08 | 4.14E-07 no |
| LOC541471 | 0.200348291  | 5.398808934  | 9.21E-08 | 4.14E-07 no |
| TXNDC9    | 0.200311477  | 5.397775408  | 9.26E-08 | 4.16E-07 no |
| LOC441666 | -0.200305004 | -5.397593702 | 9.27E-08 | 4.16E-07 no |
| TDRD3     | -0.200295803 | -5.397335407 | 9.28E-08 | 4.17E-07 no |
| SLC27A3   | 0.200295304  | 5.397321386  | 9.28E-08 | 4.17E-07 no |
| C16orf52  | -0.20027845  | -5.396848248 | 9.30E-08 | 4.18E-07 no |
| CPT1C     | -0.200243783 | -5.395875073 | 9.35E-08 | 4.20E-07 no |
| RPRD1A    | -0.200224819 | -5.395342718 | 9.38E-08 | 4.21E-07 no |
| RAI1      | -0.200194235 | -5.394484175 | 9.42E-08 | 4.23E-07 no |
| GALNT6    | 0.200177735  | 5.394020997  | 9.45E-08 | 4.24E-07 no |
| SPON1     | -0.200173074 | -5.393890151 | 9.45E-08 | 4.24E-07 no |
| RER1      | 0.200166703  | 5.393711301  | 9.46E-08 | 4.24E-07 no |
| ACSL4     | 0.200157945  | 5.393465462  | 9.47E-08 | 4.25E-07 no |
| IGFALS    | -0.200153635 | -5.393344499 | 9.48E-08 | 4.25E-07 no |
| MRPL10    | -0.200135537 | -5.392836459 | 9.51E-08 | 4.26E-07 no |
| SLC22A11  | 0.200125801  | 5.392563185  | 9.52E-08 | 4.26E-07 no |
| AMDHD1    | 0.200074748  | 5.391130142  | 9.59E-08 | 4.30E-07 no |
| ITGA2     | 0.200069663  | 5.390987406  | 9.60E-08 | 4.30E-07 no |
| HIC2      | -0.200059555 | -5.390703674 | 9.62E-08 | 4.30E-07 no |
| RMND5A    | -0.200040222 | -5.390161019 | 9.64E-08 | 4.31E-07 no |
| C3orf38   | 0.200019295  | 5.389573651  | 9.67E-08 | 4.33E-07 no |
| GPR157    | 0.200013416  | 5.38940863   | 9.68E-08 | 4.33E-07 no |
| AKAP7     | -0.199940221 | -5.38735423  | 9.79E-08 | 4.38E-07 no |
| CDC42SE1  | 0.199927926  | 5.387009154  | 9.81E-08 | 4.38E-07 no |
| TSPAN14   | 0.199881718  | 5.385712269  | 9.88E-08 | 4.41E-07 no |
| SYCE2     | -0.199871427 | -5.385423453 | 9.89E-08 | 4.42E-07 no |
| REXO1     | -0.199867312 | -5.385307945 | 9.90E-08 | 4.42E-07 no |
| 10-Sep    | 0.199805349  | 5.383568957  | 9.99E-08 | 4.46E-07 no |
| TBC1D23   | 0.199795189  | 5.383283821  | 1.00E-07 | 4.47E-07 no |
| CLCA3P    | 0.199768707  | 5.382540625  | 1.00E-07 | 4.48E-07 no |
| CFHR3     | 0.199765321  | 5.382445626  | 1.00E-07 | 4.48E-07 no |
| LARGE     | -0.199761746 | -5.382345281 | 1.01E-07 | 4.49E-07 no |
| WDR48     | -0.199751108 | -5.382046756 | 1.01E-07 | 4.49E-07 no |
| KIDINS220 | -0.199740634 | -5.381752819 | 1.01E-07 | 4.50E-07 no |
| FAM115C   | 0.199717472  | 5.381102819  | 1.01E-07 | 4.51E-07 no |
| ASTE1     | 0.199672499  | 5.379840765  | 1.02E-07 | 4.54E-07 no |
| C9orf140  | -0.199638429 | -5.378884689 | 1.02E-07 | 4.56E-07 no |
| RSAD2     | 0.199518123  | 5.37550884   | 1.04E-07 | 4.65E-07 no |
| PSRC1     | 0.19951239   | 5.375347987  | 1.04E-07 | 4.65E-07 no |

|              |              |              |          |          |    |
|--------------|--------------|--------------|----------|----------|----|
| DTX1         | -0.199490315 | -5.374728572 | 1.05E-07 | 4.66E-07 | no |
| CWC27        | -0.199431535 | -5.373079296 | 1.06E-07 | 4.70E-07 | no |
| GPKOW        | -0.199422312 | -5.372820512 | 1.06E-07 | 4.71E-07 | no |
| FZR1         | -0.199378939 | -5.371603592 | 1.06E-07 | 4.74E-07 | no |
| PRMT5        | -0.199374105 | -5.371467957 | 1.07E-07 | 4.74E-07 | no |
| SPATA13      | 0.199320207  | 5.369955761  | 1.07E-07 | 4.78E-07 | no |
| ASXL3        | -0.199313807 | -5.369776208 | 1.08E-07 | 4.78E-07 | no |
| RDH5         | 0.199301626  | 5.369434464  | 1.08E-07 | 4.79E-07 | no |
| ZNF133       | -0.199298052 | -5.369334191 | 1.08E-07 | 4.79E-07 | no |
| NCRNA00171   | -0.199279441 | -5.368812056 | 1.08E-07 | 4.80E-07 | no |
| NHP2L1       | -0.199264586 | -5.36839531  | 1.08E-07 | 4.81E-07 | no |
| C14orf93     | -0.199252653 | -5.368060523 | 1.08E-07 | 4.82E-07 | no |
| LRRC24       | -0.199236156 | -5.367597716 | 1.09E-07 | 4.83E-07 | no |
| HRH3         | -0.199222996 | -5.36722851  | 1.09E-07 | 4.84E-07 | no |
| ENOX1        | -0.199213473 | -5.366961343 | 1.09E-07 | 4.85E-07 | no |
| DNAJC13      | 0.19919019   | 5.366308174  | 1.10E-07 | 4.86E-07 | no |
| GBE1         | 0.199188446  | 5.366259236  | 1.10E-07 | 4.86E-07 | no |
| PAPD4        | 0.199083948  | 5.363327795  | 1.11E-07 | 4.94E-07 | no |
| PLEKHA3      | 0.199053316  | 5.362468514  | 1.12E-07 | 4.96E-07 | no |
| ANGEL2       | -0.199031563 | -5.361858324 | 1.12E-07 | 4.97E-07 | no |
| NAP1L2       | -0.199010491 | -5.361267228 | 1.12E-07 | 4.99E-07 | no |
| VSTM1        | 0.198992367  | 5.360758854  | 1.13E-07 | 5.00E-07 | no |
| LRGUK        | 0.198979946  | 5.360410419  | 1.13E-07 | 5.01E-07 | no |
| LOC100128288 | -0.19894749  | -5.359500055 | 1.14E-07 | 5.03E-07 | no |
| RSRC2        | -0.198940356 | -5.359299951 | 1.14E-07 | 5.04E-07 | no |
| CNTNAP2      | -0.198939195 | -5.359267385 | 1.14E-07 | 5.04E-07 | no |
| GRLF1        | -0.198895708 | -5.358047627 | 1.14E-07 | 5.07E-07 | no |
| HFM1         | -0.198884666 | -5.357737912 | 1.15E-07 | 5.08E-07 | no |
| ELP3         | -0.198861044 | -5.35707536  | 1.15E-07 | 5.09E-07 | no |
| MEX3B        | -0.198858584 | -5.357006362 | 1.15E-07 | 5.09E-07 | no |
| RNF7         | 0.198854047  | 5.356879107  | 1.15E-07 | 5.10E-07 | no |
| GOLGA7B      | -0.198737333 | -5.353605641 | 1.17E-07 | 5.18E-07 | no |
| CBR1         | 0.198695653  | 5.352436719  | 1.18E-07 | 5.21E-07 | no |
| PCDH17       | -0.198669796 | -5.351711549 | 1.18E-07 | 5.23E-07 | no |
| NCAM2        | -0.19864339  | -5.350971004 | 1.19E-07 | 5.25E-07 | no |
| ANKRD24      | -0.198622575 | -5.350387269 | 1.19E-07 | 5.27E-07 | no |
| GPR85        | -0.198618817 | -5.35028189  | 1.19E-07 | 5.27E-07 | no |
| DHPS         | -0.198598473 | -5.349711355 | 1.20E-07 | 5.28E-07 | no |
| UBC          | 0.198593987  | 5.349585562  | 1.20E-07 | 5.29E-07 | no |
| MAGOH        | 0.198554091  | 5.348466767  | 1.20E-07 | 5.32E-07 | no |
| SEMA6A       | -0.198543658 | -5.348174186 | 1.21E-07 | 5.32E-07 | no |
| STMN4        | -0.198521432 | -5.347550927 | 1.21E-07 | 5.34E-07 | no |
| LRRC49       | -0.19836495  | -5.343163057 | 1.24E-07 | 5.47E-07 | no |
| EIF4EBP2     | -0.198358933 | -5.342994357 | 1.24E-07 | 5.47E-07 | no |
| ZNRF1        | -0.198352748 | -5.342820928 | 1.24E-07 | 5.47E-07 | no |
| RSC1A1       | 0.198350019  | 5.342744399  | 1.24E-07 | 5.47E-07 | no |
| CST2         | 0.198326751  | 5.342091994  | 1.25E-07 | 5.49E-07 | no |
| DGCR5        | -0.198306091 | -5.341512718 | 1.25E-07 | 5.51E-07 | no |
| FKBP14       | 0.198270707  | 5.340520628  | 1.26E-07 | 5.54E-07 | no |
| ZNF454       | -0.198251158 | -5.339972519 | 1.26E-07 | 5.55E-07 | no |
| DNAJB6       | 0.198215949  | 5.338985373  | 1.27E-07 | 5.58E-07 | no |

|          |              |              |          |          |    |
|----------|--------------|--------------|----------|----------|----|
| OPA1     | -0.198146825 | -5.337047389 | 1.28E-07 | 5.63E-07 | no |
| DTX4     | -0.198114229 | -5.336133569 | 1.29E-07 | 5.66E-07 | no |
| CHST4    | 0.19810767   | 5.335949679  | 1.29E-07 | 5.66E-07 | no |
| BZW1     | 0.198088969  | 5.335425396  | 1.29E-07 | 5.68E-07 | no |
| KLC2     | -0.197992562 | -5.332722765 | 1.31E-07 | 5.76E-07 | no |
| DLGAP3   | -0.197970373 | -5.332100741 | 1.31E-07 | 5.78E-07 | no |
| PQBP1    | -0.197883081 | -5.329653796 | 1.33E-07 | 5.85E-07 | no |
| NTM      | -0.197874096 | -5.329401947 | 1.33E-07 | 5.86E-07 | no |
| BAI1     | -0.197852192 | -5.328787943 | 1.34E-07 | 5.88E-07 | no |
| CELF6    | -0.197842022 | -5.328502877 | 1.34E-07 | 5.88E-07 | no |
| FTSJ2    | 0.197803568  | 5.327425016  | 1.35E-07 | 5.91E-07 | no |
| SUCNR1   | 0.197803511  | 5.32742343   | 1.35E-07 | 5.91E-07 | no |
| NANS     | 0.197803323  | 5.327418145  | 1.35E-07 | 5.91E-07 | no |
| ACADSB   | -0.197758282 | -5.326155696 | 1.36E-07 | 5.95E-07 | no |
| VAX2     | -0.197739252 | -5.325622302 | 1.36E-07 | 5.97E-07 | no |
| RB1CC1   | -0.197712022 | -5.324859102 | 1.36E-07 | 5.99E-07 | no |
| CPM      | 0.197684151  | 5.324077947  | 1.37E-07 | 6.01E-07 | no |
| FBLN7    | 0.197635048  | 5.322701709  | 1.38E-07 | 6.06E-07 | no |
| CR1L     | 0.197624106  | 5.322395062  | 1.38E-07 | 6.06E-07 | no |
| KBTBD7   | -0.197588805 | -5.321405702 | 1.39E-07 | 6.10E-07 | no |
| RFX7     | -0.197584622 | -5.32128846  | 1.39E-07 | 6.10E-07 | no |
| BCL2L14  | 0.197562425  | 5.320666372  | 1.39E-07 | 6.12E-07 | no |
| RPS6KA5  | -0.197539409 | -5.320021362 | 1.40E-07 | 6.14E-07 | no |
| KCNJ10   | -0.197521452 | -5.319518099 | 1.40E-07 | 6.15E-07 | no |
| ANKRD6   | -0.197504797 | -5.319051353 | 1.41E-07 | 6.16E-07 | no |
| SEMA4B   | -0.197483578 | -5.318456719 | 1.41E-07 | 6.18E-07 | no |
| ERRFI1   | 0.197477367  | 5.318282657  | 1.41E-07 | 6.19E-07 | no |
| TICAM1   | 0.197473901  | 5.318185535  | 1.41E-07 | 6.19E-07 | no |
| NFYB     | -0.197386946 | -5.315748787 | 1.43E-07 | 6.27E-07 | no |
| SYNC     | 0.197375051  | 5.315415451  | 1.43E-07 | 6.28E-07 | no |
| SGPP1    | 0.197288767  | 5.312997645  | 1.45E-07 | 6.36E-07 | no |
| BICD1    | 0.197241907  | 5.311684604  | 1.46E-07 | 6.40E-07 | no |
| HLF      | -0.197223777 | -5.311176616 | 1.47E-07 | 6.42E-07 | no |
| RNF141   | -0.197202799 | -5.310588817 | 1.47E-07 | 6.43E-07 | no |
| ARHGEF15 | 0.197191519  | 5.310272765  | 1.47E-07 | 6.44E-07 | no |
| KIAA1267 | -0.197179372 | -5.309932432 | 1.48E-07 | 6.45E-07 | no |
| EEA1     | 0.197171025  | 5.309698543  | 1.48E-07 | 6.46E-07 | no |
| TMEM41B  | -0.197161767 | -5.309439142 | 1.48E-07 | 6.47E-07 | no |
| CRB1     | -0.19713198  | -5.308604572 | 1.49E-07 | 6.49E-07 | no |
| GPR97    | 0.197125475  | 5.30842232   | 1.49E-07 | 6.50E-07 | no |
| ANKRD45  | 0.197065755  | 5.306749125  | 1.50E-07 | 6.56E-07 | no |
| ABCB5    | 0.197058643  | 5.306549868  | 1.50E-07 | 6.56E-07 | no |
| PDLIM5   | -0.196972474 | -5.304135762 | 1.52E-07 | 6.64E-07 | no |
| C9orf47  | 0.196947106  | 5.303425061  | 1.53E-07 | 6.67E-07 | no |
| EPT1     | -0.196946242 | -5.303400866 | 1.53E-07 | 6.67E-07 | no |
| MREG     | 0.196942268  | 5.303289539  | 1.53E-07 | 6.67E-07 | no |
| RPAIN    | -0.196847187 | -5.300625938 | 1.55E-07 | 6.76E-07 | no |
| TREML3   | 0.196846602  | 5.300609545  | 1.55E-07 | 6.76E-07 | no |
| FMNL3    | 0.196811582  | 5.299628536  | 1.56E-07 | 6.79E-07 | no |
| HNF1A    | -0.196811557 | -5.299627862 | 1.56E-07 | 6.79E-07 | no |
| ATG3     | 0.196807203  | 5.299505884  | 1.56E-07 | 6.80E-07 | no |

|           |              |              |          |          |    |
|-----------|--------------|--------------|----------|----------|----|
| SERINC2   | 0.196782132  | 5.298803603  | 1.57E-07 | 6.82E-07 | no |
| ELOVL1    | 0.196774662  | 5.298594331  | 1.57E-07 | 6.83E-07 | no |
| IER5      | 0.196767222  | 5.298385943  | 1.57E-07 | 6.83E-07 | no |
| C22orf15  | 0.196765887  | 5.298348524  | 1.57E-07 | 6.83E-07 | no |
| PTK6      | -0.196764872 | -5.298320102 | 1.57E-07 | 6.83E-07 | no |
| LOC644165 | -0.196763058 | -5.298269304 | 1.57E-07 | 6.83E-07 | no |
| PCBP1     | 0.19676044   | 5.298195951  | 1.57E-07 | 6.83E-07 | no |
| C4orf12   | -0.196730527 | -5.297358061 | 1.58E-07 | 6.86E-07 | no |
| ARL1      | 0.196719524  | 5.297049855  | 1.58E-07 | 6.87E-07 | no |
| RPE       | 0.196716095  | 5.296953801  | 1.58E-07 | 6.87E-07 | no |
| LOC285033 | 0.196671476  | 5.295704014  | 1.59E-07 | 6.92E-07 | no |
| C10orf91  | 0.19663104   | 5.294571407  | 1.60E-07 | 6.96E-07 | no |
| KERA      | 0.196630912  | 5.294567824  | 1.60E-07 | 6.96E-07 | no |
| IER2      | 0.196610078  | 5.293984276  | 1.61E-07 | 6.97E-07 | no |
| TCEA3     | 0.196573546  | 5.29296106   | 1.61E-07 | 7.01E-07 | no |
| POLRMT    | -0.196519738 | -5.291454015 | 1.63E-07 | 7.07E-07 | no |
| PHACTR1   | -0.196517212 | -5.291383251 | 1.63E-07 | 7.07E-07 | no |
| EPS8L1    | 0.196495738  | 5.290781844  | 1.63E-07 | 7.09E-07 | no |
| VLDLR     | 0.196491199  | 5.290654722  | 1.63E-07 | 7.09E-07 | no |
| TRIM62    | -0.196481332 | -5.290378364 | 1.64E-07 | 7.10E-07 | no |
| C14orf45  | 0.196462953  | 5.289863619  | 1.64E-07 | 7.12E-07 | no |
| GJD3      | 0.196456443  | 5.289681308  | 1.64E-07 | 7.12E-07 | no |
| KCNN1     | -0.19645493  | -5.289638946 | 1.64E-07 | 7.12E-07 | no |
| BRAP      | -0.196443527 | -5.289319568 | 1.65E-07 | 7.13E-07 | no |
| SNN       | -0.196418456 | -5.288617434 | 1.65E-07 | 7.16E-07 | no |
| ZNF804A   | -0.196414738 | -5.288513314 | 1.65E-07 | 7.16E-07 | no |
| ATP6V1C2  | 0.196397277  | 5.288024325  | 1.66E-07 | 7.18E-07 | no |
| FGFRL1    | 0.196373117  | 5.287347722  | 1.66E-07 | 7.20E-07 | no |
| PHLDA3    | 0.196367289  | 5.287184505  | 1.66E-07 | 7.21E-07 | no |
| ATP5EP2   | 0.196357009  | 5.286896605  | 1.67E-07 | 7.21E-07 | no |
| TNFSF4    | 0.196339839  | 5.286415768  | 1.67E-07 | 7.23E-07 | no |
| PIWIL4    | 0.196326286  | 5.286036232  | 1.67E-07 | 7.24E-07 | no |
| IL1RAPL1  | -0.196303535 | -5.28539912  | 1.68E-07 | 7.27E-07 | no |
| POU3F3    | -0.196275939 | -5.284626327 | 1.69E-07 | 7.30E-07 | no |
| CD34      | 0.196249703  | 5.283891629  | 1.69E-07 | 7.32E-07 | no |
| SLC9A2    | -0.196240101 | -5.283622748 | 1.70E-07 | 7.33E-07 | no |
| BAT3      | -0.196220247 | -5.283066789 | 1.70E-07 | 7.35E-07 | no |
| MYL4      | 0.196205977  | 5.282667201  | 1.70E-07 | 7.36E-07 | no |
| TRIM13    | -0.196203261 | -5.282591139 | 1.70E-07 | 7.37E-07 | no |
| RPS27L    | 0.196184207  | 5.282057612  | 1.71E-07 | 7.38E-07 | no |
| PRDX4     | 0.196181071  | 5.281969792  | 1.71E-07 | 7.39E-07 | no |
| CS        | -0.196149883 | -5.28109647  | 1.72E-07 | 7.42E-07 | no |
| ATF3      | 0.196140358  | 5.280829758  | 1.72E-07 | 7.43E-07 | no |
| GRWD1     | 0.196125627  | 5.280417287  | 1.72E-07 | 7.44E-07 | no |
| WWOX      | -0.196120462 | -5.280272664 | 1.73E-07 | 7.45E-07 | no |
| ASH1L     | -0.19610967  | -5.279970484 | 1.73E-07 | 7.46E-07 | no |
| TADA2B    | -0.196070093 | -5.27886233  | 1.74E-07 | 7.50E-07 | no |
| TAF1D     | -0.196045634 | -5.27817748  | 1.74E-07 | 7.52E-07 | no |
| C15orf54  | 0.196021236  | 5.277494359  | 1.75E-07 | 7.55E-07 | no |
| BRP44     | 0.195957953  | 5.275722555  | 1.77E-07 | 7.62E-07 | no |
| TIGD1     | -0.195920093 | -5.274662558 | 1.78E-07 | 7.66E-07 | no |

|           |              |              |          |          |    |
|-----------|--------------|--------------|----------|----------|----|
| LOC153328 | -0.195899641 | -5.274089961 | 1.78E-07 | 7.68E-07 | no |
| MTHFR     | 0.195898799  | 5.274066386  | 1.78E-07 | 7.68E-07 | no |
| NUP54     | 0.195895246  | 5.273966912  | 1.78E-07 | 7.68E-07 | no |
| MLLT4     | -0.195844785 | -5.27255419  | 1.80E-07 | 7.74E-07 | no |
| KAT2A     | -0.19579693  | -5.271214468 | 1.81E-07 | 7.79E-07 | no |
| SPTLC2    | 0.195760178  | 5.270185618  | 1.82E-07 | 7.83E-07 | no |
| LGALS9B   | 0.195722953  | 5.269143521  | 1.83E-07 | 7.87E-07 | no |
| PUM2      | -0.195719989 | -5.269060538 | 1.83E-07 | 7.87E-07 | no |
| MBD5      | -0.195673117 | -5.267748455 | 1.84E-07 | 7.93E-07 | no |
| ZNF202    | -0.195672502 | -5.267731224 | 1.84E-07 | 7.93E-07 | no |
| SLC1A1    | -0.195627373 | -5.266467952 | 1.85E-07 | 7.98E-07 | no |
| RANBP17   | -0.195576511 | -5.26504424  | 1.87E-07 | 8.03E-07 | no |
| RNF5P1    | -0.195565031 | -5.26472289  | 1.87E-07 | 8.05E-07 | no |
| DLG4      | -0.195469542 | -5.262050144 | 1.90E-07 | 8.16E-07 | no |
| PTGDR     | 0.195445722  | 5.261383415  | 1.91E-07 | 8.18E-07 | no |
| RAB11FIP4 | -0.195436173 | -5.261116156 | 1.91E-07 | 8.19E-07 | no |
| RAB2A     | -0.195422903 | -5.26074476  | 1.91E-07 | 8.21E-07 | no |
| SS18      | 0.195404304  | 5.26022419   | 1.92E-07 | 8.23E-07 | no |
| MATN2     | 0.195385313  | 5.259692679  | 1.92E-07 | 8.25E-07 | no |
| APOD      | 0.19537945   | 5.259528561  | 1.92E-07 | 8.26E-07 | no |
| FLJ36031  | 0.195362212  | 5.259046109  | 1.93E-07 | 8.27E-07 | no |
| CACNA1A   | -0.19532525  | -5.25801166  | 1.94E-07 | 8.32E-07 | no |
| C9orf45   | -0.195309479 | -5.257570281 | 1.94E-07 | 8.34E-07 | no |
| TSPAN1    | 0.195223667  | 5.255168721  | 1.97E-07 | 8.44E-07 | no |
| POLR3C    | 0.195200629  | 5.254524022  | 1.97E-07 | 8.47E-07 | no |
| GNL3L     | 0.195198207  | 5.254456225  | 1.98E-07 | 8.47E-07 | no |
| ZMYM3     | -0.195187356 | -5.254152579 | 1.98E-07 | 8.48E-07 | no |
| WDR37     | -0.195184838 | -5.254082116 | 1.98E-07 | 8.48E-07 | no |
| SLC31A2   | 0.195143352  | 5.252921153  | 1.99E-07 | 8.53E-07 | no |
| TMEFF1    | -0.195113709 | -5.252091641 | 2.00E-07 | 8.56E-07 | no |
| PABPC5    | -0.195097073 | -5.251626089 | 2.00E-07 | 8.58E-07 | no |
| F3        | 0.195080264  | 5.251155748  | 2.01E-07 | 8.60E-07 | no |
| DNAH9     | 0.195041491  | 5.25007077   | 2.02E-07 | 8.65E-07 | no |
| FLT3LG    | 0.195006556  | 5.249093223  | 2.03E-07 | 8.69E-07 | no |
| HACE1     | -0.195001525 | -5.248952433 | 2.03E-07 | 8.70E-07 | no |
| ZNF618    | 0.194946973  | 5.247426024  | 2.05E-07 | 8.76E-07 | no |
| CD83      | 0.19494179   | 5.247281015  | 2.05E-07 | 8.77E-07 | no |
| CCDC62    | -0.194922979 | -5.246754671 | 2.06E-07 | 8.79E-07 | no |
| TMEM30A   | -0.194900432 | -5.246123809 | 2.06E-07 | 8.82E-07 | no |
| SSFA2     | 0.194885974  | 5.245719256  | 2.07E-07 | 8.84E-07 | no |
| LRPPRC    | -0.19487865  | -5.245514339 | 2.07E-07 | 8.84E-07 | no |
| GLT8D2    | 0.194856367  | 5.244890885  | 2.08E-07 | 8.87E-07 | no |
| KIF5C     | -0.194842689 | -5.244508201 | 2.08E-07 | 8.89E-07 | no |
| DNAJC9    | -0.194739812 | -5.241629915 | 2.11E-07 | 9.02E-07 | no |
| PIGV      | 0.194687159  | 5.24015684   | 2.13E-07 | 9.09E-07 | no |
| UBR3      | -0.194682799 | -5.24003489  | 2.13E-07 | 9.09E-07 | no |
| ROBLD3    | 0.194665149  | 5.239541095  | 2.14E-07 | 9.11E-07 | no |
| RPA3      | 0.194659948  | 5.239395593  | 2.14E-07 | 9.12E-07 | no |
| CBX4      | -0.194654603 | -5.239246067 | 2.14E-07 | 9.12E-07 | no |
| MAGEE1    | -0.1946381   | -5.238784394 | 2.14E-07 | 9.14E-07 | no |
| SELS      | 0.194629301  | 5.238538247  | 2.15E-07 | 9.15E-07 | no |

|           |              |              |          |          |    |
|-----------|--------------|--------------|----------|----------|----|
| C16orf57  | 0.194602563  | 5.237790253  | 2.15E-07 | 9.19E-07 | no |
| BET1      | 0.194600515  | 5.237732938  | 2.16E-07 | 9.19E-07 | no |
| RNF148    | 0.194577759  | 5.237096362  | 2.16E-07 | 9.21E-07 | no |
| MLLT11    | -0.194565474 | -5.236752705 | 2.17E-07 | 9.23E-07 | no |
| MYO1A     | 0.194560328  | 5.236608737  | 2.17E-07 | 9.23E-07 | no |
| P2RY2     | 0.194545811  | 5.236202644  | 2.17E-07 | 9.25E-07 | no |
| SYTL2     | 0.194537453  | 5.235968831  | 2.18E-07 | 9.26E-07 | no |
| SETDB2    | 0.19451211   | 5.23525992   | 2.18E-07 | 9.29E-07 | no |
| PLD4      | 0.194483866  | 5.234469836  | 2.19E-07 | 9.33E-07 | no |
| YPEL3     | -0.194437216 | -5.233164924 | 2.21E-07 | 9.39E-07 | no |
| PAR5      | -0.194411488 | -5.232445276 | 2.22E-07 | 9.42E-07 | no |
| SCN3A     | -0.194393756 | -5.231949284 | 2.22E-07 | 9.45E-07 | no |
| UBAP2     | -0.194357304 | -5.230929703 | 2.23E-07 | 9.50E-07 | no |
| LOC157627 | -0.194331214 | -5.230199963 | 2.24E-07 | 9.53E-07 | no |
| NCAPH2    | -0.194274323 | -5.228608742 | 2.26E-07 | 9.61E-07 | no |
| IFI27     | 0.194269262  | 5.228467182  | 2.26E-07 | 9.61E-07 | no |
| CMYA5     | 0.194241699  | 5.227696279  | 2.27E-07 | 9.65E-07 | no |
| KLHL11    | -0.19420848  | -5.226767186 | 2.28E-07 | 9.69E-07 | no |
| INHBA     | 0.194205361  | 5.226679967  | 2.28E-07 | 9.70E-07 | no |
| RIMBP3    | 0.194196341  | 5.226427683  | 2.29E-07 | 9.70E-07 | no |
| SEC61B    | 0.194196012  | 5.226418496  | 2.29E-07 | 9.70E-07 | no |
| LMF2      | 0.194160796  | 5.225433585  | 2.30E-07 | 9.75E-07 | no |
| FBX039    | 0.194123506  | 5.2243907    | 2.31E-07 | 9.80E-07 | no |
| RPS10P7   | 0.194102471  | 5.223802425  | 2.32E-07 | 9.83E-07 | no |
| TBC1D8B   | 0.194053314  | 5.222427715  | 2.33E-07 | 9.90E-07 | no |
| GK        | 0.194010362  | 5.221226561  | 2.35E-07 | 9.96E-07 | no |
| NR1D2     | -0.193985534 | -5.220532261 | 2.36E-07 | 9.99E-07 | no |
| GCDH      | -0.193879944 | -5.217579589 | 2.39E-07 | 1.01E-06 | no |
| RNF13     | 0.193850184  | 5.216747444  | 2.40E-07 | 1.02E-06 | no |
| COL29A1   | 0.193721482  | 5.21314882   | 2.45E-07 | 1.04E-06 | no |
| FAM100A   | -0.19368958  | -5.212256861 | 2.46E-07 | 1.04E-06 | no |
| ACTA2     | 0.19367497   | 5.211848358  | 2.47E-07 | 1.04E-06 | no |
| WNT5A     | 0.193666851  | 5.211621379  | 2.47E-07 | 1.05E-06 | no |
| OBSL1     | -0.193647697 | -5.21108584  | 2.48E-07 | 1.05E-06 | no |
| RFFL      | 0.193588798  | 5.209439138  | 2.50E-07 | 1.06E-06 | no |
| MLST8     | -0.193515105 | -5.207378912 | 2.52E-07 | 1.07E-06 | no |
| UGP2      | 0.193513485  | 5.207333622  | 2.52E-07 | 1.07E-06 | no |
| MTMR3     | -0.193503222 | -5.207046708 | 2.53E-07 | 1.07E-06 | no |
| C14orf147 | 0.19349688   | 5.206869408  | 2.53E-07 | 1.07E-06 | no |
| RAB6C     | -0.193487531 | -5.206608052 | 2.53E-07 | 1.07E-06 | no |
| LOC145837 | -0.193468448 | -5.206074583 | 2.54E-07 | 1.07E-06 | no |
| C10orf137 | -0.193460608 | -5.205855413 | 2.54E-07 | 1.08E-06 | no |
| RPL23AP82 | 0.193458152  | 5.205786755  | 2.54E-07 | 1.08E-06 | no |
| PNMA6A    | -0.193451485 | -5.20560036  | 2.55E-07 | 1.08E-06 | no |
| EXD3      | -0.193444831 | -5.20541434  | 2.55E-07 | 1.08E-06 | no |
| ZBTB5     | -0.193432598 | -5.205072392 | 2.55E-07 | 1.08E-06 | no |
| KHDC1     | -0.193286061 | -5.200976137 | 2.61E-07 | 1.10E-06 | no |
| YDJC      | 0.193270285  | 5.200535144  | 2.61E-07 | 1.10E-06 | no |
| ZNF738    | -0.193261847 | -5.200299284 | 2.62E-07 | 1.10E-06 | no |
| KIR2DL1   | 0.193230819  | 5.199431992  | 2.63E-07 | 1.11E-06 | no |
| CRELD2    | 0.193157653  | 5.197386956  | 2.66E-07 | 1.12E-06 | no |

|           |              |              |          |          |    |
|-----------|--------------|--------------|----------|----------|----|
| PDK2      | -0.193123199 | -5.196423966 | 2.67E-07 | 1.13E-06 | no |
| DIP2A     | -0.193088895 | -5.195465177 | 2.68E-07 | 1.13E-06 | no |
| NKD1      | -0.193083308 | -5.195309029 | 2.69E-07 | 1.13E-06 | no |
| SNORA7B   | 0.193055925  | 5.194543702  | 2.70E-07 | 1.14E-06 | no |
| IDI2      | -0.193027374 | -5.193745758 | 2.71E-07 | 1.14E-06 | no |
| ICK       | -0.193008724 | -5.193224532 | 2.72E-07 | 1.14E-06 | no |
| ANKH      | 0.193000382  | 5.192991377  | 2.72E-07 | 1.15E-06 | no |
| SRGAP2    | 0.192944143  | 5.191419649  | 2.74E-07 | 1.15E-06 | no |
| SEZ6L2    | -0.192909547 | -5.19045281  | 2.75E-07 | 1.16E-06 | no |
| CXorf40A  | 0.192875026  | 5.189488104  | 2.77E-07 | 1.17E-06 | no |
| TTL1      | -0.192828538 | -5.188188982 | 2.79E-07 | 1.17E-06 | no |
| KRT80     | 0.192822125  | 5.188009791  | 2.79E-07 | 1.17E-06 | no |
| LOC338799 | -0.192805612 | -5.187548324 | 2.80E-07 | 1.18E-06 | no |
| GGA1      | -0.192760162 | -5.18627829  | 2.82E-07 | 1.18E-06 | no |
| ORAI2     | 0.192759637  | 5.186263609  | 2.82E-07 | 1.18E-06 | no |
| WDR45L    | -0.192725776 | -5.185317408 | 2.83E-07 | 1.19E-06 | no |
| AQP3      | 0.192724128  | 5.185271368  | 2.83E-07 | 1.19E-06 | no |
| TPSB2     | 0.192713889  | 5.18498526   | 2.83E-07 | 1.19E-06 | no |
| UPK2      | -0.192713074 | -5.184962479 | 2.83E-07 | 1.19E-06 | no |
| TCTN3     | 0.19271062   | 5.184893915  | 2.84E-07 | 1.19E-06 | no |
| SOX21     | -0.192665242 | -5.183625953 | 2.85E-07 | 1.20E-06 | no |
| LRRN4     | -0.192655746 | -5.183360604 | 2.86E-07 | 1.20E-06 | no |
| SNED1     | 0.192614756  | 5.182215271  | 2.87E-07 | 1.21E-06 | no |
| OCIAD2    | 0.192613841  | 5.182189723  | 2.88E-07 | 1.21E-06 | no |
| TMC01     | 0.192541283  | 5.180162418  | 2.91E-07 | 1.22E-06 | no |
| WDR53     | 0.192538271  | 5.180078248  | 2.91E-07 | 1.22E-06 | no |
| NFYA      | -0.192536915 | -5.180040373 | 2.91E-07 | 1.22E-06 | no |
| ZNF219    | -0.19250625  | -5.179183596 | 2.92E-07 | 1.22E-06 | no |
| OAS3      | 0.192482476  | 5.17851937   | 2.93E-07 | 1.23E-06 | no |
| ZC3H6     | -0.19245682  | -5.177802564 | 2.94E-07 | 1.23E-06 | no |
| CHST6     | 0.192434551  | 5.177180402  | 2.95E-07 | 1.24E-06 | no |
| C1orf96   | -0.192427546 | -5.17698472  | 2.95E-07 | 1.24E-06 | no |
| HS1BP3    | 0.192424733  | 5.176906117  | 2.95E-07 | 1.24E-06 | no |
| TBPL1     | -0.192392981 | -5.176019047 | 2.97E-07 | 1.24E-06 | no |
| STOX1     | -0.19238038  | -5.175667012 | 2.97E-07 | 1.25E-06 | no |
| PHLDA2    | 0.192367668  | 5.175311858  | 2.98E-07 | 1.25E-06 | no |
| CNTN1     | -0.192366821 | -5.175288211 | 2.98E-07 | 1.25E-06 | no |
| NRG3      | -0.19225708  | -5.172222466 | 3.03E-07 | 1.27E-06 | no |
| C2orf40   | 0.192254575  | 5.172152478  | 3.03E-07 | 1.27E-06 | no |
| QPCT      | 0.192246344  | 5.171922543  | 3.03E-07 | 1.27E-06 | no |
| CDH22     | -0.192210181 | -5.170912355 | 3.05E-07 | 1.27E-06 | no |
| REEP6     | -0.19214338  | -5.169046327 | 3.08E-07 | 1.29E-06 | no |
| ATXN7L2   | -0.192143073 | -5.169037752 | 3.08E-07 | 1.29E-06 | no |
| KIF26A    | -0.192102675 | -5.167909324 | 3.09E-07 | 1.29E-06 | no |
| BSN       | -0.192091073 | -5.167585252 | 3.10E-07 | 1.30E-06 | no |
| KIAA1486  | -0.191961793 | -5.163974285 | 3.16E-07 | 1.32E-06 | no |
| PTGES     | 0.191935241  | 5.163232696  | 3.17E-07 | 1.32E-06 | no |
| SSRP1     | -0.191923659 | -5.16290922  | 3.18E-07 | 1.33E-06 | no |
| DLC1      | 0.191896156  | 5.162141066  | 3.19E-07 | 1.33E-06 | no |
| GOLPH3    | 0.191890061  | 5.161970845  | 3.19E-07 | 1.33E-06 | no |
| GGCT      | 0.191860549  | 5.161146599  | 3.20E-07 | 1.34E-06 | no |



|            |              |              |          |          |    |
|------------|--------------|--------------|----------|----------|----|
| PRRX2      | 0.191859736  | 5.161123889  | 3.20E-07 | 1.34E-06 | no |
| LOC284440  | -0.191819343 | -5.159995788 | 3.22E-07 | 1.34E-06 | no |
| UBN2       | -0.191793911 | -5.159285524 | 3.24E-07 | 1.35E-06 | no |
| PRKCZ      | -0.191788124 | -5.159123928 | 3.24E-07 | 1.35E-06 | no |
| MYCNOS     | -0.191775598 | -5.158774097 | 3.24E-07 | 1.35E-06 | no |
| ATRN       | -0.19175883  | -5.158305834 | 3.25E-07 | 1.36E-06 | no |
| ENO2       | -0.191724418 | -5.157344822 | 3.27E-07 | 1.36E-06 | no |
| TM7SF2     | -0.191706896 | -5.156855478 | 3.28E-07 | 1.37E-06 | no |
| C1orf88    | 0.191703585  | 5.156763023  | 3.28E-07 | 1.37E-06 | no |
| RHOD       | 0.191702827  | 5.156741857  | 3.28E-07 | 1.37E-06 | no |
| OSTCL      | 0.191669099  | 5.155799992  | 3.29E-07 | 1.37E-06 | no |
| WDR41      | 0.191660829  | 5.155569048  | 3.30E-07 | 1.37E-06 | no |
| CLDN9      | -0.191645977 | -5.155154307 | 3.30E-07 | 1.38E-06 | no |
| ANKRD36BP1 | 0.191639175  | 5.154964344  | 3.31E-07 | 1.38E-06 | no |
| GZF1       | -0.191626867 | -5.15462066  | 3.31E-07 | 1.38E-06 | no |
| HN1L       | 0.191618416  | 5.154384669  | 3.32E-07 | 1.38E-06 | no |
| DVL2       | -0.19160561  | -5.154027062 | 3.32E-07 | 1.38E-06 | no |
| CTNNBIP1   | -0.191592982 | -5.153674431 | 3.33E-07 | 1.38E-06 | no |
| BIRC2      | 0.191565369  | 5.152903366  | 3.34E-07 | 1.39E-06 | no |
| SLC16A4    | 0.191531771  | 5.151965206  | 3.36E-07 | 1.40E-06 | no |
| PTAR1      | 0.191501453  | 5.151118635  | 3.37E-07 | 1.40E-06 | no |
| PTPN11     | -0.191492107 | -5.150857676 | 3.38E-07 | 1.40E-06 | no |
| SYBU       | -0.191458051 | -5.149906754 | 3.40E-07 | 1.41E-06 | no |
| LETMD1     | -0.191458014 | -5.149905729 | 3.40E-07 | 1.41E-06 | no |
| SCN1A      | -0.191404059 | -5.14839922  | 3.42E-07 | 1.42E-06 | no |
| SMC3       | -0.191403647 | -5.148387728 | 3.42E-07 | 1.42E-06 | no |
| RELT       | 0.191392756  | 5.148083642  | 3.43E-07 | 1.42E-06 | no |
| COPG       | 0.191386556  | 5.147910536  | 3.43E-07 | 1.42E-06 | no |
| TNFAIP8L3  | 0.191383573  | 5.147827239  | 3.43E-07 | 1.42E-06 | no |
| NCOA6      | -0.191370334 | -5.147457605 | 3.44E-07 | 1.43E-06 | no |
| IMPDH2     | -0.191366023 | -5.147337238 | 3.44E-07 | 1.43E-06 | no |
| CA10       | -0.191362365 | -5.147235111 | 3.44E-07 | 1.43E-06 | no |
| LETM1      | -0.191354384 | -5.147012272 | 3.45E-07 | 1.43E-06 | no |
| SPATA16    | 0.191342234  | 5.146673055  | 3.45E-07 | 1.43E-06 | no |
| CASQ1      | -0.191331502 | -5.146373419 | 3.46E-07 | 1.43E-06 | no |
| CCL20      | 0.191328895  | 5.146300611  | 3.46E-07 | 1.43E-06 | no |
| OR2A9P     | 0.191326844  | 5.146243354  | 3.46E-07 | 1.43E-06 | no |
| TMEM200B   | 0.191310263  | 5.145780411  | 3.47E-07 | 1.44E-06 | no |
| TIGD7      | -0.191293019 | -5.145298976 | 3.48E-07 | 1.44E-06 | no |
| RANBP9     | 0.191286945  | 5.145129406  | 3.48E-07 | 1.44E-06 | no |
| MORC2      | -0.191276634 | -5.144841529 | 3.48E-07 | 1.44E-06 | no |
| CDK5R2     | -0.191256621 | -5.144282789 | 3.49E-07 | 1.45E-06 | no |
| MGC42105   | -0.191242631 | -5.143892218 | 3.50E-07 | 1.45E-06 | no |
| CES1       | 0.19124077   | 5.14384027   | 3.50E-07 | 1.45E-06 | no |
| ZNF195     | -0.191237957 | -5.143761739 | 3.50E-07 | 1.45E-06 | no |
| FAM35B     | -0.191193078 | -5.142508795 | 3.53E-07 | 1.46E-06 | no |
| TBL3       | -0.191176517 | -5.142046452 | 3.53E-07 | 1.46E-06 | no |
| C5orf58    | 0.191164262  | 5.141704352  | 3.54E-07 | 1.46E-06 | no |
| PADI6      | 0.191151302  | 5.141342532  | 3.55E-07 | 1.47E-06 | no |
| ZNF613     | 0.191146167  | 5.141199197  | 3.55E-07 | 1.47E-06 | no |
| EYA4       | 0.191140572  | 5.141042982  | 3.55E-07 | 1.47E-06 | no |

|           |              |              |          |          |    |
|-----------|--------------|--------------|----------|----------|----|
| BRSK1     | -0.191126485 | -5.140649743 | 3.56E-07 | 1.47E-06 | no |
| AMN1      | -0.191108934 | -5.140159779 | 3.57E-07 | 1.47E-06 | no |
| NCKIPSD   | -0.191029715 | -5.137948336 | 3.61E-07 | 1.49E-06 | no |
| LYPLA1    | 0.191017336  | 5.137602797  | 3.62E-07 | 1.49E-06 | no |
| SOCS7     | -0.191011642 | -5.137443837 | 3.62E-07 | 1.49E-06 | no |
| OLFM1     | -0.191006317 | -5.137295199 | 3.62E-07 | 1.49E-06 | no |
| GDF15     | 0.1909788    | 5.136527076  | 3.64E-07 | 1.50E-06 | no |
| TTC9B     | -0.190961658 | -5.136048594 | 3.65E-07 | 1.50E-06 | no |
| SFMBT1    | 0.190945744  | 5.135604372  | 3.65E-07 | 1.51E-06 | no |
| VGLL3     | 0.190934916  | 5.135302131  | 3.66E-07 | 1.51E-06 | no |
| MORN3     | 0.190882369  | 5.133835391  | 3.69E-07 | 1.52E-06 | no |
| C14orf142 | 0.190870111  | 5.133493262  | 3.69E-07 | 1.52E-06 | no |
| UBA3      | 0.190847713  | 5.132868067  | 3.71E-07 | 1.53E-06 | no |
| NUDT21    | -0.190845233 | -5.132798871 | 3.71E-07 | 1.53E-06 | no |
| C8orf76   | 0.190844077  | 5.132766595  | 3.71E-07 | 1.53E-06 | no |
| ATF6      | 0.190838012  | 5.132597312  | 3.71E-07 | 1.53E-06 | no |
| PI4K2B    | 0.190803581  | 5.131636291  | 3.73E-07 | 1.53E-06 | no |
| C12orf65  | -0.190758205 | -5.130369814 | 3.75E-07 | 1.54E-06 | no |
| SNCAIP    | -0.190741084 | -5.129891969 | 3.76E-07 | 1.55E-06 | no |
| RNMT      | -0.190709954 | -5.129023159 | 3.78E-07 | 1.55E-06 | no |
| CEND1     | -0.190676439 | -5.128087777 | 3.80E-07 | 1.56E-06 | no |
| NECAB2    | -0.190661088 | -5.127659346 | 3.81E-07 | 1.56E-06 | no |
| LRRIQ3    | 0.190655552  | 5.127504846  | 3.81E-07 | 1.57E-06 | no |
| FAM48B2   | 0.190614395  | 5.126356226  | 3.83E-07 | 1.57E-06 | no |
| NDUFS2    | -0.190593906 | -5.125784413 | 3.84E-07 | 1.58E-06 | no |
| KIAA0040  | 0.190534873  | 5.124136976  | 3.87E-07 | 1.59E-06 | no |
| GNAI1     | -0.190524161 | -5.123838044 | 3.88E-07 | 1.59E-06 | no |
| RHOC      | 0.190523422  | 5.123817427  | 3.88E-07 | 1.59E-06 | no |
| MOSPD2    | 0.190505105  | 5.123306281  | 3.89E-07 | 1.60E-06 | no |
| ZNF280B   | -0.190501259 | -5.123198949 | 3.89E-07 | 1.60E-06 | no |
| KCNH8     | -0.190476342 | -5.122503624 | 3.91E-07 | 1.60E-06 | no |
| AXIN2     | -0.190455566 | -5.121923859 | 3.92E-07 | 1.61E-06 | no |
| LRRC37A4  | -0.190452162 | -5.121828856 | 3.92E-07 | 1.61E-06 | no |
| PLXNB3    | -0.19045211  | -5.121827415 | 3.92E-07 | 1.61E-06 | no |
| AATF      | -0.190422231 | -5.120993647 | 3.94E-07 | 1.61E-06 | no |
| TM4SF18   | 0.190406678  | 5.120559642  | 3.95E-07 | 1.62E-06 | no |
| FBX044    | -0.190397652 | -5.120307793 | 3.95E-07 | 1.62E-06 | no |
| NKX3-1    | 0.190382544  | 5.119886205  | 3.96E-07 | 1.62E-06 | no |
| GOSR2     | 0.190381092  | 5.1198457    | 3.96E-07 | 1.62E-06 | no |
| AGBL2     | 0.190374611  | 5.119664852  | 3.96E-07 | 1.62E-06 | no |
| SMC4      | 0.190357855  | 5.119197278  | 3.97E-07 | 1.63E-06 | no |
| DDX47     | 0.190345328  | 5.118847748  | 3.98E-07 | 1.63E-06 | no |
| PDLIM3    | 0.190327105  | 5.118339247  | 3.99E-07 | 1.63E-06 | no |
| GPRC5B    | -0.190319009 | -5.118113365 | 4.00E-07 | 1.64E-06 | no |
| CCBP2     | 0.190284043  | 5.117137707  | 4.02E-07 | 1.64E-06 | no |
| CMPK1     | 0.19028202   | 5.11708127   | 4.02E-07 | 1.64E-06 | no |
| ANKRD1    | 0.19021625   | 5.11524617   | 4.05E-07 | 1.66E-06 | no |
| TSPAN9    | 0.190199866  | 5.114789039  | 4.06E-07 | 1.66E-06 | no |
| RBM14     | -0.190186625 | -5.114419604 | 4.07E-07 | 1.67E-06 | no |
| EYA3      | 0.190147335  | 5.113323374  | 4.09E-07 | 1.67E-06 | no |
| C10orf10  | 0.190139246  | 5.113097708  | 4.10E-07 | 1.68E-06 | no |

|              |              |              |          |          |    |
|--------------|--------------|--------------|----------|----------|----|
| SLC22A18AS   | 0.190131238  | 5.112874267  | 4.10E-07 | 1.68E-06 | no |
| C2CD4C       | -0.190099223 | -5.111981066 | 4.12E-07 | 1.68E-06 | no |
| PSPC1        | -0.190066528 | -5.111068901 | 4.14E-07 | 1.69E-06 | no |
| SPATA17      | 0.190058966  | 5.110857945  | 4.15E-07 | 1.69E-06 | no |
| AFF3         | -0.189992013 | -5.108990073 | 4.19E-07 | 1.71E-06 | no |
| SERTAD1      | 0.189989532  | 5.108920857  | 4.19E-07 | 1.71E-06 | no |
| FAM188A      | -0.189974175 | -5.108492445 | 4.20E-07 | 1.71E-06 | no |
| NTRK2        | -0.18995526  | -5.107964758 | 4.21E-07 | 1.72E-06 | no |
| LYPLA2P1     | 0.189858629  | 5.105269133  | 4.27E-07 | 1.74E-06 | no |
| C2orf28      | 0.189831375  | 5.104508886  | 4.28E-07 | 1.75E-06 | no |
| FAM171B      | -0.18981047  | -5.103925738 | 4.30E-07 | 1.75E-06 | no |
| RPIA         | 0.189799878  | 5.10363029   | 4.30E-07 | 1.75E-06 | no |
| TRAPPC6B     | -0.189770629 | -5.102814417 | 4.32E-07 | 1.76E-06 | no |
| ARMC2        | 0.189757444  | 5.102446637  | 4.33E-07 | 1.76E-06 | no |
| SYS1         | 0.189738478  | 5.101917589  | 4.34E-07 | 1.77E-06 | no |
| ANKRD36      | -0.189700773 | -5.100865888 | 4.36E-07 | 1.78E-06 | no |
| METT10D      | -0.189685844 | -5.100449481 | 4.37E-07 | 1.78E-06 | no |
| NRD1         | 0.189680157  | 5.100290851  | 4.38E-07 | 1.78E-06 | no |
| LGALS3       | 0.189669371  | 5.099989999  | 4.38E-07 | 1.78E-06 | no |
| SLC5A12      | -0.18964888  | -5.099418479 | 4.40E-07 | 1.79E-06 | no |
| HMGCLL1      | -0.189604595 | -5.098183301 | 4.42E-07 | 1.80E-06 | no |
| NCOA1        | -0.189567481 | -5.097148141 | 4.45E-07 | 1.81E-06 | no |
| PNMA3        | -0.189441138 | -5.093624515 | 4.53E-07 | 1.84E-06 | no |
| ADCY2        | -0.189421517 | -5.093077315 | 4.54E-07 | 1.85E-06 | no |
| LOC100130148 | -0.189417553 | -5.09296675  | 4.54E-07 | 1.85E-06 | no |
| PSAT1        | -0.189410521 | -5.092770659 | 4.55E-07 | 1.85E-06 | no |
| CHI3L1       | 0.189369811  | 5.091635353  | 4.57E-07 | 1.86E-06 | no |
| CNNM2        | -0.189366547 | -5.091544319 | 4.58E-07 | 1.86E-06 | no |
| LRRC42       | 0.189362651  | 5.09143566   | 4.58E-07 | 1.86E-06 | no |
| EMR3         | 0.189314763  | 5.090100232  | 4.61E-07 | 1.87E-06 | no |
| C20orf118    | 0.189274928  | 5.088989392  | 4.63E-07 | 1.88E-06 | no |
| MRPS15       | 0.18927273   | 5.088928091  | 4.64E-07 | 1.88E-06 | no |
| SSTR1        | -0.189266093 | -5.088743016 | 4.64E-07 | 1.88E-06 | no |
| UBA5         | -0.189255948 | -5.088460114 | 4.65E-07 | 1.89E-06 | no |
| TATDN1       | -0.18924472  | -5.088147019 | 4.65E-07 | 1.89E-06 | no |
| TMEM170A     | -0.189219826 | -5.087452843 | 4.67E-07 | 1.90E-06 | no |
| PTDSS1       | 0.189202436  | 5.086967934  | 4.68E-07 | 1.90E-06 | no |
| COL5A3       | 0.189177473  | 5.086271869  | 4.70E-07 | 1.91E-06 | no |
| PABPN1       | -0.189143282 | -5.085318472 | 4.72E-07 | 1.92E-06 | no |
| SOX12        | -0.189136626 | -5.085132897 | 4.73E-07 | 1.92E-06 | no |
| DCAF8        | -0.189124035 | -5.084781816 | 4.74E-07 | 1.92E-06 | no |
| EFHC2        | 0.189102578  | 5.084183517  | 4.75E-07 | 1.93E-06 | no |
| ERICH1       | 0.189076259  | 5.083449683  | 4.77E-07 | 1.93E-06 | no |
| APH1A        | 0.189006718  | 5.081510737  | 4.81E-07 | 1.95E-06 | no |
| LGALS14      | 0.189004723  | 5.081455105  | 4.82E-07 | 1.95E-06 | no |
| FAM19A2      | -0.189002585 | -5.08139549  | 4.82E-07 | 1.95E-06 | no |
| EVL          | -0.188995217 | -5.081190063 | 4.82E-07 | 1.95E-06 | no |
| PLAC8        | 0.188965729  | 5.080367929  | 4.84E-07 | 1.96E-06 | no |
| EPC1         | -0.188964258 | -5.080326919 | 4.84E-07 | 1.96E-06 | no |
| FAM124B      | 0.188951459  | 5.079970059  | 4.85E-07 | 1.96E-06 | no |
| RPRD2        | -0.188923811 | -5.079199244 | 4.87E-07 | 1.97E-06 | no |

|              |              |              |          |          |    |
|--------------|--------------|--------------|----------|----------|----|
| TCAP         | -0.188918331 | -5.079046451 | 4.87E-07 | 1.97E-06 | no |
| ZNF691       | 0.188879943  | 5.077976211  | 4.90E-07 | 1.98E-06 | no |
| KIAA2022     | -0.188859376 | -5.077402808 | 4.92E-07 | 1.99E-06 | no |
| DNAJC27      | -0.188846954 | -5.077056502 | 4.92E-07 | 1.99E-06 | no |
| IFT20        | 0.188829447  | 5.076568439  | 4.94E-07 | 2.00E-06 | no |
| CDK7         | 0.188815181  | 5.07617071   | 4.95E-07 | 2.00E-06 | no |
| USP4         | 0.188778078  | 5.075136369  | 4.97E-07 | 2.01E-06 | no |
| LOC100128239 | -0.188767349 | -5.074837278 | 4.98E-07 | 2.01E-06 | no |
| TMEM196      | -0.188745455 | -5.074226914 | 5.00E-07 | 2.02E-06 | no |
| PITRM1       | -0.188743605 | -5.074175344 | 5.00E-07 | 2.02E-06 | no |
| HERC1        | -0.188734029 | -5.073908409 | 5.00E-07 | 2.02E-06 | no |
| UBL3         | -0.188697587 | -5.072892532 | 5.03E-07 | 2.03E-06 | no |
| WBP5         | 0.188695614  | 5.072837524  | 5.03E-07 | 2.03E-06 | no |
| LOC25845     | -0.188694163 | -5.072797072 | 5.03E-07 | 2.03E-06 | no |
| TMX1         | 0.188623722  | 5.070833482  | 5.08E-07 | 2.05E-06 | no |
| C20orf24     | 0.188603412  | 5.070267344  | 5.10E-07 | 2.06E-06 | no |
| KIAA1244     | -0.188572024 | -5.069392431 | 5.12E-07 | 2.06E-06 | no |
| STT3B        | 0.188561183  | 5.069090224  | 5.13E-07 | 2.07E-06 | no |
| PPP1R1A      | -0.188557703 | -5.068993241 | 5.13E-07 | 2.07E-06 | no |
| DCXR         | -0.188533384 | -5.068315378 | 5.15E-07 | 2.07E-06 | no |
| PL-5283      | 0.188524901  | 5.068078928  | 5.15E-07 | 2.08E-06 | no |
| CDH18        | -0.188477156 | -5.066748126 | 5.19E-07 | 2.09E-06 | no |
| WLS          | 0.18847265   | 5.066622525  | 5.19E-07 | 2.09E-06 | no |
| MXRA7        | 0.188471956  | 5.066603192  | 5.19E-07 | 2.09E-06 | no |
| OSTalpha     | 0.188451353  | 5.066028932  | 5.21E-07 | 2.10E-06 | no |
| MYO5A        | -0.188429293 | -5.065414067 | 5.22E-07 | 2.10E-06 | no |
| WDFY3        | -0.188422122 | -5.065214194 | 5.23E-07 | 2.10E-06 | no |
| FBXL5        | 0.18841812   | 5.065102662  | 5.23E-07 | 2.11E-06 | no |
| UBXN1        | -0.188406206 | -5.064770599 | 5.24E-07 | 2.11E-06 | no |
| GREB1        | -0.188396458 | -5.064498913 | 5.25E-07 | 2.11E-06 | no |
| KCNN2        | -0.188383294 | -5.064132003 | 5.26E-07 | 2.11E-06 | no |
| RGS7         | -0.188344822 | -5.063059744 | 5.29E-07 | 2.13E-06 | no |
| LOXL1        | 0.18832145   | 5.062408384  | 5.30E-07 | 2.13E-06 | no |
| BAHCC1       | -0.188301948 | -5.061864852 | 5.32E-07 | 2.14E-06 | no |
| SLC44A3      | 0.188300888  | 5.061835297  | 5.32E-07 | 2.14E-06 | no |
| SLC12A6      | -0.18829678  | -5.061720828 | 5.32E-07 | 2.14E-06 | no |
| GHRLOS       | 0.188264377  | 5.060817768  | 5.35E-07 | 2.15E-06 | no |
| HNRNPH2      | -0.188256246 | -5.060591163 | 5.35E-07 | 2.15E-06 | no |
| RPL7         | -0.188234705 | -5.059990848 | 5.37E-07 | 2.16E-06 | no |
| RPL15        | -0.188225488 | -5.059733968 | 5.38E-07 | 2.16E-06 | no |
| LOC100190938 | -0.188194813 | -5.058879116 | 5.40E-07 | 2.17E-06 | no |
| UCN2         | 0.188193241  | 5.058835295  | 5.40E-07 | 2.17E-06 | no |
| ACBD7        | -0.188181193 | -5.058499538 | 5.41E-07 | 2.17E-06 | no |
| SFRS2B       | -0.188147019 | -5.057547187 | 5.44E-07 | 2.18E-06 | no |
| WDR92        | 0.188097385  | 5.05616406   | 5.47E-07 | 2.20E-06 | no |
| MOBKL2B      | -0.188095061 | -5.056099301 | 5.48E-07 | 2.20E-06 | no |
| PIM2         | 0.188073512  | 5.055498792  | 5.49E-07 | 2.20E-06 | no |
| RND3         | 0.188046736  | 5.054752657  | 5.51E-07 | 2.21E-06 | no |
| LUC7L        | -0.18803794  | -5.054507571 | 5.52E-07 | 2.21E-06 | no |
| POLR2L       | 0.187928015  | 5.051444546  | 5.61E-07 | 2.25E-06 | no |
| ABHD6        | -0.187920716 | -5.05124116  | 5.61E-07 | 2.25E-06 | no |

|              |              |              |          |          |    |
|--------------|--------------|--------------|----------|----------|----|
| MYL9         | 0.187811049  | 5.048185541  | 5.70E-07 | 2.28E-06 | no |
| ASGR1        | -0.187790036 | -5.047600071 | 5.72E-07 | 2.29E-06 | no |
| NUCKS1       | -0.187785997 | -5.047487554 | 5.72E-07 | 2.29E-06 | no |
| AN08         | -0.187765994 | -5.046930236 | 5.74E-07 | 2.30E-06 | no |
| SESTD1       | -0.187737502 | -5.046136417 | 5.76E-07 | 2.30E-06 | no |
| CIT          | -0.187728845 | -5.045895244 | 5.77E-07 | 2.31E-06 | no |
| PTOV1        | -0.18769641  | -5.044991604 | 5.79E-07 | 2.32E-06 | no |
| PDE5A        | 0.187678776  | 5.044500304  | 5.81E-07 | 2.32E-06 | no |
| SLC25A20     | 0.187667642  | 5.044190121  | 5.82E-07 | 2.32E-06 | no |
| FOXSI        | 0.187646353  | 5.043597017  | 5.83E-07 | 2.33E-06 | no |
| NEK8         | 0.187594984  | 5.042165956  | 5.87E-07 | 2.35E-06 | no |
| SEC24C       | -0.187568997 | -5.041442008 | 5.90E-07 | 2.36E-06 | no |
| NCRNA00176   | -0.18754778  | -5.04085095  | 5.91E-07 | 2.36E-06 | no |
| NDN          | -0.187543346 | -5.040727414 | 5.92E-07 | 2.36E-06 | no |
| SCAMP1       | -0.187516483 | -5.039979085 | 5.94E-07 | 2.37E-06 | no |
| TRIM25       | 0.187502388  | 5.039586454  | 5.95E-07 | 2.38E-06 | no |
| GNB5         | -0.187484666 | -5.039092768 | 5.97E-07 | 2.38E-06 | no |
| PPP2R5D      | -0.187456985 | -5.038321686 | 5.99E-07 | 2.39E-06 | no |
| LYVE1        | 0.18745365   | 5.038228782  | 5.99E-07 | 2.39E-06 | no |
| BASP1        | -0.187443314 | -5.037940854 | 6.00E-07 | 2.39E-06 | no |
| ORC5L        | 0.187406881  | 5.036926009  | 6.03E-07 | 2.41E-06 | no |
| PFKP         | -0.187387231 | -5.036378665 | 6.05E-07 | 2.41E-06 | no |
| IFRD2        | 0.187387158  | 5.036376614  | 6.05E-07 | 2.41E-06 | no |
| DNAJB4       | 0.187363995  | 5.035731425  | 6.07E-07 | 2.42E-06 | no |
| FRMD6        | 0.187326396  | 5.034684138  | 6.10E-07 | 2.43E-06 | no |
| LOC100129637 | -0.18732508  | -5.034647484 | 6.10E-07 | 2.43E-06 | no |
| ST7L         | 0.187320922  | 5.034531641  | 6.11E-07 | 2.43E-06 | no |
| SNUPN        | 0.187247508  | 5.032486824  | 6.17E-07 | 2.46E-06 | no |
| CHST12       | 0.18724094   | 5.032303899  | 6.17E-07 | 2.46E-06 | no |
| GPAT2        | 0.187191503  | 5.030926973  | 6.22E-07 | 2.48E-06 | no |
| LTB4R        | 0.187172232  | 5.030390244  | 6.23E-07 | 2.48E-06 | no |
| XKR7         | -0.18714793  | -5.029713388 | 6.26E-07 | 2.49E-06 | no |
| TRAPPC2      | -0.187085464 | -5.027973691 | 6.31E-07 | 2.51E-06 | no |
| OTUB1        | -0.187083352 | -5.02791486  | 6.31E-07 | 2.51E-06 | no |
| RABL5        | 0.187069932  | 5.027541128  | 6.32E-07 | 2.52E-06 | no |
| RAPGEF2      | -0.187064572 | -5.02739184  | 6.33E-07 | 2.52E-06 | no |
| TEAD2        | 0.18705272   | 5.027061761  | 6.34E-07 | 2.52E-06 | no |
| SGK269       | -0.187047377 | -5.026912974 | 6.34E-07 | 2.52E-06 | no |
| LIMS3-LOC440 | 0.187024793  | 5.026284015  | 6.36E-07 | 2.53E-06 | no |
| C3orf66      | 0.187018536  | 5.026109788  | 6.37E-07 | 2.53E-06 | no |
| HNRNPA0      | -0.187014342 | -5.025992979 | 6.37E-07 | 2.53E-06 | no |
| C2CD2        | 0.18700291   | 5.02567461   | 6.38E-07 | 2.54E-06 | no |
| FAAH         | -0.186947035 | -5.024118586 | 6.43E-07 | 2.56E-06 | no |
| CDK2         | 0.18688486   | 5.022387185  | 6.49E-07 | 2.58E-06 | no |
| C16orf7      | -0.18686443  | -5.021818271 | 6.51E-07 | 2.58E-06 | no |
| BTNL9        | -0.186857822 | -5.021634258 | 6.51E-07 | 2.59E-06 | no |
| ACVR1B       | -0.186846266 | -5.021312478 | 6.53E-07 | 2.59E-06 | no |
| PLEKHM3      | -0.186833691 | -5.020962298 | 6.54E-07 | 2.59E-06 | no |
| ZNF827       | -0.18679261  | -5.019818371 | 6.57E-07 | 2.61E-06 | no |
| POU2F1       | -0.186784335 | -5.019587968 | 6.58E-07 | 2.61E-06 | no |
| CNIH3        | 0.186782284  | 5.019530862  | 6.58E-07 | 2.61E-06 | no |

|              |              |              |          |          |    |
|--------------|--------------|--------------|----------|----------|----|
| KIAA1755     | -0.186774144 | -5.019304185 | 6.59E-07 | 2.61E-06 | no |
| CENPT        | -0.186765623 | -5.019066919 | 6.60E-07 | 2.62E-06 | no |
| CRIP3        | -0.186753145 | -5.018719466 | 6.61E-07 | 2.62E-06 | no |
| C16orf63     | 0.186748435  | 5.018588338  | 6.61E-07 | 2.62E-06 | no |
| RASSF2       | -0.186734102 | -5.018189246 | 6.63E-07 | 2.63E-06 | no |
| MARK4        | -0.186676471 | -5.016584551 | 6.68E-07 | 2.65E-06 | no |
| SAMHD1       | 0.186613883  | 5.01484194   | 6.74E-07 | 2.67E-06 | no |
| REEP1        | -0.186584745 | -5.014030658 | 6.77E-07 | 2.68E-06 | no |
| ZFP36L1      | 0.18655264   | 5.013136811  | 6.80E-07 | 2.69E-06 | no |
| SNIP1        | 0.186541647  | 5.012830749  | 6.81E-07 | 2.69E-06 | no |
| CNKSR1       | -0.186540489 | -5.012798492 | 6.81E-07 | 2.69E-06 | no |
| MRPS2        | -0.186518776 | -5.012193985 | 6.83E-07 | 2.70E-06 | no |
| LIMK1        | 0.186492915  | 5.011474001  | 6.86E-07 | 2.71E-06 | no |
| PCOTH        | 0.186483046  | 5.011199235  | 6.86E-07 | 2.71E-06 | no |
| HAR1A        | -0.186456149 | -5.010450432 | 6.89E-07 | 2.72E-06 | no |
| FBXO17       | 0.186447296  | 5.010203975  | 6.90E-07 | 2.73E-06 | no |
| VSTM2B       | -0.186406188 | -5.00905953  | 6.94E-07 | 2.74E-06 | no |
| ITGB4        | 0.186359234  | 5.007752399  | 6.98E-07 | 2.76E-06 | no |
| SYP          | -0.186358369 | -5.007728315 | 6.99E-07 | 2.76E-06 | no |
| CHGA         | -0.186353955 | -5.007605436 | 6.99E-07 | 2.76E-06 | no |
| SYNGR1       | -0.186329807 | -5.006933227 | 7.01E-07 | 2.77E-06 | no |
| SULT1E1      | 0.186289069  | 5.005799164  | 7.05E-07 | 2.78E-06 | no |
| TTC7B        | -0.186175851 | -5.002647588 | 7.17E-07 | 2.83E-06 | no |
| NCRNA00158   | -0.186138093 | -5.001596601 | 7.20E-07 | 2.84E-06 | no |
| ZNF341       | -0.186117125 | -5.00101298  | 7.22E-07 | 2.85E-06 | no |
| GPR4         | 0.186094645  | 5.000387263  | 7.25E-07 | 2.86E-06 | no |
| LOC100286844 | -0.186082545 | -5.000050472 | 7.26E-07 | 2.86E-06 | no |
| PM20D2       | -0.186055604 | -4.999300596 | 7.29E-07 | 2.87E-06 | no |
| DPEP3        | 0.186015548  | 4.998185711  | 7.33E-07 | 2.89E-06 | no |
| ZBTB4        | -0.185996171 | -4.997646414 | 7.35E-07 | 2.90E-06 | no |
| KLRC2        | -0.185981751 | -4.997245055 | 7.36E-07 | 2.90E-06 | no |
| CHST1        | -0.18595711  | -4.996559261 | 7.39E-07 | 2.91E-06 | no |
| KCTD2        | -0.185944983 | -4.996221746 | 7.40E-07 | 2.92E-06 | no |
| RAI2         | -0.185939443 | -4.996067545 | 7.41E-07 | 2.92E-06 | no |
| RBM6         | -0.18584192  | -4.993353409 | 7.51E-07 | 2.96E-06 | no |
| HSD17B1      | -0.185834492 | -4.993146701 | 7.51E-07 | 2.96E-06 | no |
| SLC2A3       | 0.185814589  | 4.992592806  | 7.54E-07 | 2.97E-06 | no |
| NBR1         | -0.185715528 | -4.989836061 | 7.64E-07 | 3.01E-06 | no |
| UBE2QL1      | -0.185700293 | -4.98941208  | 7.66E-07 | 3.01E-06 | no |
| EPDR1        | 0.185678211  | 4.988797613  | 7.68E-07 | 3.02E-06 | no |
| MMP11        | 0.185672912  | 4.988650136  | 7.69E-07 | 3.02E-06 | no |
| YEATS2       | -0.185648427 | -4.9879688   | 7.71E-07 | 3.03E-06 | no |
| FLOT1        | 0.18563719   | 4.987656104  | 7.72E-07 | 3.04E-06 | no |
| LMBRD1       | 0.185621505  | 4.987219654  | 7.74E-07 | 3.04E-06 | no |
| ARHGEF17     | -0.185611741 | -4.986947943 | 7.75E-07 | 3.05E-06 | no |
| MGAT5B       | -0.185599842 | -4.986616855 | 7.76E-07 | 3.05E-06 | no |
| ETS2         | 0.185569554  | 4.985774074  | 7.80E-07 | 3.06E-06 | no |
| SEZ6         | -0.185552104 | -4.985288497 | 7.82E-07 | 3.07E-06 | no |
| DIP2B        | -0.185479477 | -4.983267676 | 7.89E-07 | 3.10E-06 | no |
| NCRNA00093   | -0.185429221 | -4.981869355 | 7.95E-07 | 3.12E-06 | no |
| MEOX2        | 0.185420143  | 4.981616781  | 7.96E-07 | 3.12E-06 | no |

|              |              |              |          |          |    |
|--------------|--------------|--------------|----------|----------|----|
| ASPHD1       | -0.185412206 | -4.98139594  | 7.97E-07 | 3.13E-06 | no |
| TNFAIP8L1    | 0.185377797  | 4.980443405  | 8.01E-07 | 3.14E-06 | no |
| LOC283070    | -0.185368523 | -4.980180567 | 8.02E-07 | 3.15E-06 | no |
| LOC550643    | 0.185367807  | 4.98016065   | 8.02E-07 | 3.15E-06 | no |
| GLT8D1       | 0.185356502  | 4.97984612   | 8.03E-07 | 3.15E-06 | no |
| ZNF525       | 0.185322478  | 4.978899517  | 8.07E-07 | 3.16E-06 | no |
| C9orf128     | -0.18528284  | -4.977796713 | 8.11E-07 | 3.18E-06 | no |
| DENR         | 0.185277435  | 4.977646351  | 8.12E-07 | 3.18E-06 | no |
| MGC23270     | 0.185251976  | 4.976938078  | 8.15E-07 | 3.19E-06 | no |
| NEDD1        | 0.185134335  | 4.973665333  | 8.28E-07 | 3.25E-06 | no |
| SFT2D1       | 0.185090087  | 4.972434433  | 8.33E-07 | 3.26E-06 | no |
| FAM76A       | 0.185077487  | 4.972083931  | 8.35E-07 | 3.27E-06 | no |
| CPNE8        | 0.185066804  | 4.971786753  | 8.36E-07 | 3.27E-06 | no |
| ADARB2       | -0.185064103 | -4.971711628 | 8.36E-07 | 3.27E-06 | no |
| C5orf22      | 0.18501103   | 4.970235278  | 8.42E-07 | 3.30E-06 | no |
| SNRNP200     | -0.184987793 | -4.96958891  | 8.45E-07 | 3.31E-06 | no |
| LOC729991-ME | -0.184978014 | -4.969316898 | 8.46E-07 | 3.31E-06 | no |
| GSS          | 0.184925603  | 4.967859047  | 8.53E-07 | 3.34E-06 | no |
| ATP11C       | 0.184865116  | 4.966176607  | 8.60E-07 | 3.36E-06 | no |
| LOC678655    | -0.184847456 | -4.965685417 | 8.62E-07 | 3.37E-06 | no |
| TCF7L2       | -0.184827094 | -4.965119072 | 8.64E-07 | 3.38E-06 | no |
| KAAG1        | 0.184806126  | 4.964535878  | 8.67E-07 | 3.39E-06 | no |
| ZNF578       | -0.184786849 | -4.963999727 | 8.69E-07 | 3.40E-06 | no |
| SNX7         | 0.184765902  | 4.963417129  | 8.72E-07 | 3.41E-06 | no |
| TNNT3        | 0.18473515   | 4.962561828  | 8.75E-07 | 3.42E-06 | no |
| ZNF474       | 0.184729227  | 4.962397092  | 8.76E-07 | 3.42E-06 | no |
| TBC1D4       | 0.184718869  | 4.962109008  | 8.77E-07 | 3.43E-06 | no |
| C2orf80      | -0.18469263  | -4.96137927  | 8.80E-07 | 3.44E-06 | no |
| CASP9        | -0.184689016 | -4.961278755 | 8.81E-07 | 3.44E-06 | no |
| AHSA1        | -0.184654234 | -4.960311427 | 8.85E-07 | 3.45E-06 | no |
| LOC100270804 | -0.184624811 | -4.959493159 | 8.89E-07 | 3.47E-06 | no |
| DAGLA        | -0.184603861 | -4.958910532 | 8.91E-07 | 3.48E-06 | no |
| PPP2R1A      | -0.184602671 | -4.95887743  | 8.91E-07 | 3.48E-06 | no |
| BCL7B        | 0.184596446  | 4.95870432   | 8.92E-07 | 3.48E-06 | no |
| FAM180A      | 0.184540442  | 4.957146856  | 8.99E-07 | 3.51E-06 | no |
| FLJ40292     | -0.184529462 | -4.956841519 | 9.01E-07 | 3.51E-06 | no |
| SPATA6       | 0.18452807   | 4.956802808  | 9.01E-07 | 3.51E-06 | no |
| KTI12        | 0.184500462  | 4.956035049  | 9.04E-07 | 3.52E-06 | no |
| DNAJC16      | 0.184499713  | 4.956014237  | 9.04E-07 | 3.52E-06 | no |
| USP14        | 0.184496564  | 4.955926671  | 9.05E-07 | 3.52E-06 | no |
| CTPS2        | -0.184484264 | -4.955584628 | 9.06E-07 | 3.53E-06 | no |
| ENDOG        | -0.184482954 | -4.955548205 | 9.06E-07 | 3.53E-06 | no |
| C9orf139     | 0.184480898  | 4.955491011  | 9.07E-07 | 3.53E-06 | no |
| HMX1         | -0.184475077 | -4.955329149 | 9.07E-07 | 3.53E-06 | no |
| PSMB2        | 0.184406154  | 4.95341258   | 9.16E-07 | 3.56E-06 | no |
| TIAL1        | -0.184380536 | -4.952700203 | 9.19E-07 | 3.58E-06 | no |
| LOC154761    | 0.18425681   | 4.949259945  | 9.35E-07 | 3.64E-06 | no |
| TFB2M        | 0.18424859   | 4.949031375  | 9.36E-07 | 3.64E-06 | no |
| FKBP8        | -0.184222496 | -4.948305866 | 9.40E-07 | 3.65E-06 | no |
| APBA1        | -0.184215558 | -4.948112958 | 9.40E-07 | 3.66E-06 | no |
| IL17A        | 0.184211309  | 4.947994801  | 9.41E-07 | 3.66E-06 | no |

|           |              |              |          |          |    |
|-----------|--------------|--------------|----------|----------|----|
| ADAM22    | -0.184207528 | -4.947889691 | 9.41E-07 | 3.66E-06 | no |
| ZNF778    | -0.184203026 | -4.947764496 | 9.42E-07 | 3.66E-06 | no |
| USP19     | -0.184199038 | -4.947653641 | 9.43E-07 | 3.66E-06 | no |
| ACCN3     | -0.184174243 | -4.946964233 | 9.46E-07 | 3.67E-06 | no |
| IP04      | 0.184160394  | 4.946579198  | 9.48E-07 | 3.68E-06 | no |
| BRD1      | -0.184103232 | -4.944989945 | 9.55E-07 | 3.71E-06 | no |
| YY1AP1    | -0.184097576 | -4.9448327   | 9.56E-07 | 3.71E-06 | no |
| AEN       | 0.184089183  | 4.94459935   | 9.57E-07 | 3.71E-06 | no |
| MPP4      | 0.184065895  | 4.943951897  | 9.60E-07 | 3.73E-06 | no |
| HARBI1    | 0.184049292  | 4.943490321  | 9.62E-07 | 3.73E-06 | no |
| TMEM106C  | 0.184044841  | 4.94336656   | 9.63E-07 | 3.73E-06 | no |
| SCRT2     | -0.184003199 | -4.942208889 | 9.68E-07 | 3.76E-06 | no |
| NR3C2     | -0.183967348 | -4.941212197 | 9.73E-07 | 3.77E-06 | no |
| DUSP14    | 0.183963743  | 4.941111994  | 9.74E-07 | 3.77E-06 | no |
| UNC5B     | 0.183961083  | 4.941038053  | 9.74E-07 | 3.78E-06 | no |
| FDX1      | 0.183918649  | 4.939858399  | 9.80E-07 | 3.80E-06 | no |
| KRT7      | 0.183918543  | 4.939855449  | 9.80E-07 | 3.80E-06 | no |
| WIPF3     | 0.183882688  | 4.938858721  | 9.85E-07 | 3.81E-06 | no |
| KHDRBS2   | -0.18387607  | -4.938674742 | 9.85E-07 | 3.82E-06 | no |
| KIAA1984  | -0.183873961 | -4.938616128 | 9.86E-07 | 3.82E-06 | no |
| GNL2      | 0.183839842  | 4.937667658  | 9.90E-07 | 3.83E-06 | no |
| PRR14     | -0.1838358   | -4.937555297 | 9.91E-07 | 3.84E-06 | no |
| KANK1     | -0.183821466 | -4.937156846 | 9.93E-07 | 3.84E-06 | no |
| SLC26A1   | -0.183804811 | -4.936693883 | 9.95E-07 | 3.85E-06 | no |
| MAFK      | 0.183802083  | 4.936618041  | 9.96E-07 | 3.85E-06 | no |
| ACO2      | -0.18379325  | -4.936372525 | 9.97E-07 | 3.85E-06 | no |
| AQP1      | 0.183792898  | 4.936362733  | 9.97E-07 | 3.85E-06 | no |
| RAB9B     | -0.183785753 | -4.936164125 | 9.98E-07 | 3.86E-06 | no |
| ZNF358    | -0.183776861 | -4.935916958 | 9.99E-07 | 3.86E-06 | no |
| GPN2      | 0.183774858  | 4.935861276  | 9.99E-07 | 3.86E-06 | no |
| PRR5      | 0.183764829  | 4.935582509  | 1.00E-06 | 3.87E-06 | no |
| EEF1DP3   | -0.183753216 | -4.935259698 | 1.00E-06 | 3.87E-06 | no |
| PAQR7     | 0.183752215  | 4.935231861  | 1.00E-06 | 3.87E-06 | no |
| SPAG4     | 0.183736702  | 4.934800652  | 1.00E-06 | 3.88E-06 | no |
| CBX5      | -0.183723897 | -4.934444729 | 1.01E-06 | 3.89E-06 | no |
| GRIK5     | -0.183718275 | -4.934288451 | 1.01E-06 | 3.89E-06 | no |
| SLC30A1   | 0.183671989  | 4.933001908  | 1.01E-06 | 3.91E-06 | no |
| ADH4      | 0.183667887  | 4.932887889  | 1.01E-06 | 3.91E-06 | no |
| FCRL4     | 0.183660561  | 4.932684268  | 1.02E-06 | 3.92E-06 | no |
| MX1       | 0.183640127  | 4.932116297  | 1.02E-06 | 3.93E-06 | no |
| PKIA      | -0.183638169 | -4.932061874 | 1.02E-06 | 3.93E-06 | no |
| TMEM180   | -0.183634267 | -4.931953426 | 1.02E-06 | 3.93E-06 | no |
| JRK       | -0.1835423   | -4.929397281 | 1.03E-06 | 3.98E-06 | no |
| SLC7A8    | 0.183516352  | 4.928676123  | 1.04E-06 | 3.99E-06 | no |
| SELM      | 0.183504146  | 4.928336876  | 1.04E-06 | 4.00E-06 | no |
| ZNF253    | -0.183494497 | -4.928068691 | 1.04E-06 | 4.00E-06 | no |
| ATP6AP1L  | -0.183486981 | -4.927859816 | 1.04E-06 | 4.01E-06 | no |
| SLC35B4   | 0.183476717  | 4.927574557  | 1.04E-06 | 4.01E-06 | no |
| GNLY      | 0.183467267  | 4.927311905  | 1.04E-06 | 4.01E-06 | no |
| CERKL     | 0.183393465  | 4.925260852  | 1.05E-06 | 4.05E-06 | no |
| LOC728743 | -0.183368375 | -4.924563591 | 1.06E-06 | 4.07E-06 | no |



|           |              |              |          |          |    |
|-----------|--------------|--------------|----------|----------|----|
| GOLGA8A   | -0.183361343 | -4.924368168 | 1.06E-06 | 4.07E-06 | no |
| LOC401397 | 0.183356471  | 4.924232759  | 1.06E-06 | 4.07E-06 | no |
| SUM03     | 0.183322193  | 4.923280185  | 1.06E-06 | 4.09E-06 | no |
| FBXL17    | -0.183310299 | -4.922949644 | 1.07E-06 | 4.10E-06 | no |
| SCAP      | -0.183296966 | -4.922579129 | 1.07E-06 | 4.10E-06 | no |
| LOC146336 | -0.183277562 | -4.922039893 | 1.07E-06 | 4.11E-06 | no |
| MRM1      | -0.183248712 | -4.921238187 | 1.07E-06 | 4.13E-06 | no |
| RPAP2     | 0.183136792  | 4.918128171  | 1.09E-06 | 4.19E-06 | no |
| GABBR2    | -0.183121202 | -4.917694984 | 1.09E-06 | 4.20E-06 | no |
| AOX1      | 0.18304591   | 4.91560293   | 1.10E-06 | 4.24E-06 | no |
| KIAA0913  | -0.183044563 | -4.915565502 | 1.10E-06 | 4.24E-06 | no |
| SLU7      | -0.182999473 | -4.914312675 | 1.11E-06 | 4.27E-06 | no |
| FLJ37453  | -0.182994808 | -4.914183058 | 1.11E-06 | 4.27E-06 | no |
| TPM2      | 0.182987077  | 4.913968254  | 1.11E-06 | 4.27E-06 | no |
| MAPKBP1   | -0.182985815 | -4.913933173 | 1.11E-06 | 4.27E-06 | no |
| ZNF254    | -0.182977161 | -4.913692732 | 1.11E-06 | 4.28E-06 | no |
| ARPP19    | -0.182971722 | -4.913541622 | 1.12E-06 | 4.28E-06 | no |
| HLA-J     | 0.182951385  | 4.912976577  | 1.12E-06 | 4.29E-06 | no |
| IAH1      | 0.182928514  | 4.912341139  | 1.12E-06 | 4.31E-06 | no |
| SAPS3     | -0.182917977 | -4.912048378 | 1.12E-06 | 4.31E-06 | no |
| WBP4      | -0.182892269 | -4.911334126 | 1.13E-06 | 4.33E-06 | no |
| RASA2     | 0.182856009  | 4.910326712  | 1.13E-06 | 4.35E-06 | no |
| SGTA      | -0.182848254 | -4.910111256 | 1.13E-06 | 4.35E-06 | no |
| PCBD1     | 0.182831287  | 4.909639899  | 1.14E-06 | 4.36E-06 | no |
| SIAH2     | 0.18282233   | 4.90939103   | 1.14E-06 | 4.36E-06 | no |
| RFPL4A    | 0.182813637  | 4.909149538  | 1.14E-06 | 4.37E-06 | no |
| FAM43A    | 0.182798575  | 4.908731098  | 1.14E-06 | 4.38E-06 | no |
| TMEM179   | -0.182777538 | -4.908146653 | 1.15E-06 | 4.39E-06 | no |
| ABCB6     | -0.182774489 | -4.908061935 | 1.15E-06 | 4.39E-06 | no |
| PGPEP1    | 0.18275546   | 4.907533288  | 1.15E-06 | 4.40E-06 | no |
| SMCR7L    | -0.182728404 | -4.906781679 | 1.15E-06 | 4.41E-06 | no |
| RARG      | 0.18271064   | 4.906288184  | 1.16E-06 | 4.42E-06 | no |
| C20orf177 | -0.182671983 | -4.905214287 | 1.16E-06 | 4.45E-06 | no |
| NECAP1    | -0.182656671 | -4.90478893  | 1.16E-06 | 4.46E-06 | no |
| CRHR1     | -0.182655668 | -4.904761073 | 1.17E-06 | 4.46E-06 | no |
| SMARCD3   | -0.182631013 | -4.904076167 | 1.17E-06 | 4.47E-06 | no |
| FAM72A    | 0.182577991  | 4.902603302  | 1.18E-06 | 4.50E-06 | no |
| XPA       | -0.182566516 | -4.902284546 | 1.18E-06 | 4.51E-06 | no |
| KGFLP2    | -0.182534888 | -4.901405994 | 1.18E-06 | 4.53E-06 | no |
| NELF      | -0.182518925 | -4.900962592 | 1.19E-06 | 4.54E-06 | no |
| MLLT3     | -0.182508807 | -4.90068154  | 1.19E-06 | 4.54E-06 | no |
| ELL       | 0.18250402   | 4.900548584  | 1.19E-06 | 4.54E-06 | no |
| C13orf15  | -0.182480856 | -4.899905141 | 1.19E-06 | 4.56E-06 | no |
| FBXW2     | 0.182460246  | 4.899332695  | 1.20E-06 | 4.57E-06 | no |
| BBS2      | -0.18243755  | -4.898702277 | 1.20E-06 | 4.58E-06 | no |
| EFHA2     | -0.182422228 | -4.898276688 | 1.20E-06 | 4.59E-06 | no |
| ZNF337    | -0.182380327 | -4.897112874 | 1.21E-06 | 4.62E-06 | no |
| S100A16   | 0.18229745   | 4.894811041  | 1.22E-06 | 4.67E-06 | no |
| PYROXD1   | 0.182284358  | 4.894447411  | 1.23E-06 | 4.68E-06 | no |
| AZI2      | 0.182280215  | 4.894332364  | 1.23E-06 | 4.68E-06 | no |
| NT5M      | -0.182232512 | -4.893007488 | 1.23E-06 | 4.71E-06 | no |

|           |              |              |          |          |    |
|-----------|--------------|--------------|----------|----------|----|
| ABCA6     | 0.182195101  | 4.891968513  | 1.24E-06 | 4.73E-06 | no |
| KLHL32    | -0.182191449 | -4.891867073 | 1.24E-06 | 4.73E-06 | no |
| RPL39L    | 0.182163815  | 4.891099639  | 1.25E-06 | 4.75E-06 | no |
| PABPC3    | 0.182109395  | 4.889588333  | 1.26E-06 | 4.78E-06 | no |
| SLC23A3   | 0.182101549  | 4.889370446  | 1.26E-06 | 4.79E-06 | no |
| OR2C1     | -0.182093178 | -4.889137977 | 1.26E-06 | 4.79E-06 | no |
| PNCK      | -0.182081231 | -4.888806216 | 1.26E-06 | 4.80E-06 | no |
| SIGIRR    | 0.182020458  | 4.887118551  | 1.27E-06 | 4.84E-06 | no |
| TLR9      | 0.182001416  | 4.886589779  | 1.27E-06 | 4.85E-06 | no |
| CEP57     | -0.18198887  | -4.886241393 | 1.28E-06 | 4.86E-06 | no |
| ZNF205    | -0.181981707 | -4.886042465 | 1.28E-06 | 4.86E-06 | no |
| PREX1     | 0.181964603  | 4.885567525  | 1.28E-06 | 4.87E-06 | no |
| ITGA7     | 0.181949254  | 4.885141293  | 1.28E-06 | 4.88E-06 | no |
| NETO1     | -0.181907793 | -4.883990017 | 1.29E-06 | 4.91E-06 | no |
| FYTTD1    | 0.181892735  | 4.883571901  | 1.29E-06 | 4.92E-06 | no |
| DSG2      | 0.181889679  | 4.883487048  | 1.29E-06 | 4.92E-06 | no |
| ZNF561    | 0.181887743  | 4.883433282  | 1.29E-06 | 4.92E-06 | no |
| KANK3     | -0.181881954 | -4.883272534 | 1.29E-06 | 4.92E-06 | no |
| ADRB2     | 0.181859819  | 4.882657922  | 1.30E-06 | 4.93E-06 | no |
| BAIAP2L2  | -0.181841022 | -4.882135993 | 1.30E-06 | 4.95E-06 | no |
| XYLB      | 0.181829071  | 4.881804138  | 1.30E-06 | 4.95E-06 | no |
| SCP2      | 0.181772877  | 4.880243877  | 1.31E-06 | 4.99E-06 | no |
| ADCY5     | -0.181767595 | -4.880097221 | 1.32E-06 | 4.99E-06 | no |
| SCRN2     | -0.181767223 | -4.880086879 | 1.32E-06 | 4.99E-06 | no |
| ACSF2     | 0.18172275   | 4.878852102  | 1.32E-06 | 5.02E-06 | no |
| SNORA8    | -0.181710517 | -4.878512456 | 1.33E-06 | 5.03E-06 | no |
| NOX4      | 0.181694418  | 4.878065478  | 1.33E-06 | 5.04E-06 | no |
| ZNF708    | -0.181693986 | -4.87805349  | 1.33E-06 | 5.04E-06 | no |
| PLA2G5    | 0.181652127  | 4.876891311  | 1.34E-06 | 5.07E-06 | no |
| CHD6      | -0.181643881 | -4.876662365 | 1.34E-06 | 5.07E-06 | no |
| LPPR2     | -0.181615166 | -4.875865166 | 1.34E-06 | 5.09E-06 | no |
| AZI1      | -0.181589479 | -4.875152016 | 1.35E-06 | 5.11E-06 | no |
| PRRT1     | -0.181575749 | -4.874770845 | 1.35E-06 | 5.12E-06 | no |
| HECTD3    | 0.181559565  | 4.874321533  | 1.35E-06 | 5.13E-06 | no |
| MAGEL2    | -0.181535442 | -4.873651844 | 1.36E-06 | 5.14E-06 | no |
| ZNF414    | -0.181497273 | -4.872592208 | 1.36E-06 | 5.17E-06 | no |
| KIAA2013  | 0.181480677  | 4.87213147   | 1.37E-06 | 5.18E-06 | no |
| ALG8      | 0.181470818  | 4.87185778   | 1.37E-06 | 5.18E-06 | no |
| SH3GLB2   | -0.181470008 | -4.871835307 | 1.37E-06 | 5.18E-06 | no |
| VPS29     | 0.181442586  | 4.871074043  | 1.37E-06 | 5.20E-06 | no |
| MARK3     | -0.181417191 | -4.870369082 | 1.38E-06 | 5.22E-06 | no |
| NCKAP1    | -0.181415299 | -4.870316555 | 1.38E-06 | 5.22E-06 | no |
| C6orf170  | -0.181400284 | -4.869899756 | 1.38E-06 | 5.23E-06 | no |
| ZNF770    | -0.181367193 | -4.868981181 | 1.39E-06 | 5.25E-06 | no |
| CN5H6.4   | -0.181346668 | -4.868411404 | 1.39E-06 | 5.27E-06 | no |
| UPP2      | -0.181341049 | -4.868255445 | 1.39E-06 | 5.27E-06 | no |
| HIST1H2BC | 0.181326686  | 4.867856731  | 1.40E-06 | 5.28E-06 | no |
| LOC348926 | 0.181306707  | 4.867302154  | 1.40E-06 | 5.29E-06 | no |
| UNC45A    | 0.18129765   | 4.867050767  | 1.40E-06 | 5.30E-06 | no |
| LDHD      | -0.181288427 | -4.866794748 | 1.40E-06 | 5.30E-06 | no |
| LHFPL3    | -0.181254101 | -4.865841943 | 1.41E-06 | 5.33E-06 | no |

|          |              |              |          |          |    |
|----------|--------------|--------------|----------|----------|----|
| KIAA2026 | -0.181228856 | -4.865141203 | 1.42E-06 | 5.34E-06 | no |
| GLYR1    | -0.181228601 | -4.865134134 | 1.42E-06 | 5.34E-06 | no |
| AKIRIN1  | 0.18117919   | 4.863762659  | 1.42E-06 | 5.38E-06 | no |
| PPP4R1L  | 0.181169619  | 4.863496987  | 1.43E-06 | 5.38E-06 | no |
| EIF2AK2  | 0.181141806  | 4.862725038  | 1.43E-06 | 5.40E-06 | no |
| C9orf7   | -0.181128724 | -4.862361937 | 1.43E-06 | 5.41E-06 | no |
| CPE      | -0.181112531 | -4.861912489 | 1.44E-06 | 5.42E-06 | no |
| E4F1     | -0.181096879 | -4.861478055 | 1.44E-06 | 5.43E-06 | no |
| TXNRD2   | -0.181084807 | -4.861143008 | 1.44E-06 | 5.44E-06 | no |
| KIAA1875 | -0.181071042 | -4.860760966 | 1.45E-06 | 5.45E-06 | no |
| CEP72    | -0.181043828 | -4.860005651 | 1.45E-06 | 5.47E-06 | no |
| CLEC18B  | 0.181015804  | 4.859227898  | 1.46E-06 | 5.49E-06 | no |
| UBQLNL   | 0.18100355   | 4.858887809  | 1.46E-06 | 5.50E-06 | no |
| ADAT1    | 0.180980926  | 4.858259898  | 1.46E-06 | 5.51E-06 | no |
| SLC47A1  | 0.180944084  | 4.857237452  | 1.47E-06 | 5.54E-06 | no |
| PFN4     | 0.180927287  | 4.856771297  | 1.47E-06 | 5.55E-06 | no |
| TRIM17   | -0.180907908 | -4.856233471 | 1.48E-06 | 5.56E-06 | no |
| GPR98    | -0.180870704 | -4.855201012 | 1.49E-06 | 5.59E-06 | no |
| ACAD8    | -0.180812255 | -4.853579007 | 1.50E-06 | 5.63E-06 | no |
| GSK3B    | -0.180788451 | -4.85291842  | 1.50E-06 | 5.65E-06 | no |
| TBX4     | 0.180758842  | 4.85209677   | 1.51E-06 | 5.67E-06 | no |
| EXOSC3   | 0.180724335  | 4.851139243  | 1.52E-06 | 5.70E-06 | no |
| WDR83    | -0.180722203 | -4.851080061 | 1.52E-06 | 5.70E-06 | no |
| KLF17    | 0.180690644  | 4.85020435   | 1.52E-06 | 5.72E-06 | no |
| IL17RC   | 0.180687217  | 4.850109242  | 1.52E-06 | 5.72E-06 | no |
| GRIN2C   | -0.180652718 | -4.849151981 | 1.53E-06 | 5.75E-06 | no |
| LRP5     | -0.180588476 | -4.847369406 | 1.54E-06 | 5.80E-06 | no |
| COL10A1  | 0.180553894  | 4.84640987   | 1.55E-06 | 5.83E-06 | no |
| GEMIN6   | 0.180524047  | 4.845581736  | 1.56E-06 | 5.85E-06 | no |
| BOP1     | -0.180522801 | -4.84554717  | 1.56E-06 | 5.85E-06 | no |
| TECPR2   | -0.180521085 | -4.84549957  | 1.56E-06 | 5.85E-06 | no |
| FAM86B1  | 0.180510635  | 4.845209616  | 1.56E-06 | 5.86E-06 | no |
| TBC1D5   | -0.180496602 | -4.844820252 | 1.56E-06 | 5.87E-06 | no |
| FOXD4L2  | -0.180482815 | -4.84443773  | 1.57E-06 | 5.87E-06 | no |
| MT1L     | 0.180473685  | 4.844184417  | 1.57E-06 | 5.88E-06 | no |
| ELMO1    | -0.180428148 | -4.842921008 | 1.58E-06 | 5.92E-06 | no |
| CYP4V2   | 0.18041637   | 4.842594228  | 1.58E-06 | 5.92E-06 | no |
| TMEM121  | -0.180414823 | -4.842551317 | 1.58E-06 | 5.92E-06 | no |
| RAB6A    | -0.180414663 | -4.842546864 | 1.58E-06 | 5.92E-06 | no |
| ARHGAP31 | -0.180340917 | -4.840500868 | 1.60E-06 | 5.98E-06 | no |
| SCNN1D   | -0.180327776 | -4.84013631  | 1.60E-06 | 5.99E-06 | no |
| NPEPPS   | -0.1803256   | -4.840075951 | 1.60E-06 | 5.99E-06 | no |
| ADAMTS4  | 0.180320975  | 4.83994762   | 1.60E-06 | 5.99E-06 | no |
| LGR5     | -0.180319857 | -4.839916604 | 1.60E-06 | 5.99E-06 | no |
| GPN3     | 0.180286371  | 4.838987631  | 1.61E-06 | 6.02E-06 | no |
| SH3BP2   | 0.180272582  | 4.838605084  | 1.61E-06 | 6.03E-06 | no |
| GPR179   | -0.18020436  | -4.836712518 | 1.63E-06 | 6.09E-06 | no |
| OR6K3    | 0.180193013  | 4.836397721  | 1.63E-06 | 6.09E-06 | no |
| NKPD1    | -0.180192621 | -4.83638686  | 1.63E-06 | 6.09E-06 | no |
| PMS2     | -0.180166378 | -4.835658859 | 1.63E-06 | 6.11E-06 | no |
| SNHG7    | -0.180121463 | -4.834412917 | 1.64E-06 | 6.15E-06 | no |

|           |              |              |          |          |    |
|-----------|--------------|--------------|----------|----------|----|
| MMRN2     | 0.180105245  | 4.833963037  | 1.65E-06 | 6.16E-06 | no |
| PPM1F     | 0.180071894  | 4.833037905  | 1.65E-06 | 6.19E-06 | no |
| IL6       | 0.180067086  | 4.832904523  | 1.66E-06 | 6.19E-06 | no |
| TRPC3     | -0.180059865 | -4.83270424  | 1.66E-06 | 6.20E-06 | no |
| CYS1      | -0.180056259 | -4.832604222 | 1.66E-06 | 6.20E-06 | no |
| WSCD2     | -0.180046545 | -4.832334749 | 1.66E-06 | 6.20E-06 | no |
| HDDC2     | -0.18002261  | -4.831670838 | 1.67E-06 | 6.22E-06 | no |
| GCHFR     | 0.179983959  | 4.83059874   | 1.67E-06 | 6.26E-06 | no |
| CSNK1G2   | 0.179967435  | 4.830140412  | 1.68E-06 | 6.27E-06 | no |
| IDH3G     | -0.179964373 | -4.830055489 | 1.68E-06 | 6.27E-06 | no |
| WHSC1     | -0.179962293 | -4.829997785 | 1.68E-06 | 6.27E-06 | no |
| HRH4      | 0.179935453  | 4.829253314  | 1.69E-06 | 6.29E-06 | no |
| TMPRSS7   | 0.179932518  | 4.829171907  | 1.69E-06 | 6.29E-06 | no |
| KRCC1     | 0.179926726  | 4.829011257  | 1.69E-06 | 6.30E-06 | no |
| SUPV3L1   | -0.179914489 | -4.828671855 | 1.69E-06 | 6.31E-06 | no |
| CDA       | 0.179911719  | 4.828595006  | 1.69E-06 | 6.31E-06 | no |
| C6orf162  | -0.179878882 | -4.827684254 | 1.70E-06 | 6.33E-06 | no |
| RCBTB1    | -0.179862192 | -4.82722134  | 1.70E-06 | 6.35E-06 | no |
| ARRDC4    | 0.179829324  | 4.826309733  | 1.71E-06 | 6.37E-06 | no |
| PIGZ      | -0.179764407 | -4.824509265 | 1.72E-06 | 6.43E-06 | no |
| BATF2     | 0.179750048  | 4.824111044  | 1.73E-06 | 6.44E-06 | no |
| TGFB1I1   | 0.179721687  | 4.823324489  | 1.73E-06 | 6.46E-06 | no |
| HAS3      | 0.179714439  | 4.823123477  | 1.74E-06 | 6.47E-06 | no |
| GABRG2    | -0.179695533 | -4.822599131 | 1.74E-06 | 6.48E-06 | no |
| KCNK17    | 0.179692398  | 4.822512206  | 1.74E-06 | 6.49E-06 | no |
| CSTF2T    | -0.179689433 | -4.822429976 | 1.74E-06 | 6.49E-06 | no |
| D2HGDH    | -0.179684056 | -4.822280843 | 1.74E-06 | 6.49E-06 | no |
| TAS2R19   | -0.179664157 | -4.82172899  | 1.75E-06 | 6.51E-06 | no |
| C10orf111 | -0.179656835 | -4.821525947 | 1.75E-06 | 6.51E-06 | no |
| SEC23IP   | 0.179641955  | 4.821113283  | 1.75E-06 | 6.52E-06 | no |
| EFNB1     | 0.179582815  | 4.819473218  | 1.77E-06 | 6.57E-06 | no |
| ZNF24     | -0.179570991 | -4.819145316 | 1.77E-06 | 6.58E-06 | no |
| TMEM184C  | 0.179562943  | 4.818922131  | 1.77E-06 | 6.59E-06 | no |
| TTC4      | 0.1795413    | 4.818321969  | 1.78E-06 | 6.61E-06 | no |
| CYP2D6    | -0.179523087 | -4.81781691  | 1.78E-06 | 6.62E-06 | no |
| FAM136A   | 0.179518711  | 4.817695567  | 1.78E-06 | 6.63E-06 | no |
| PCSK2     | -0.179515428 | -4.817604514 | 1.78E-06 | 6.63E-06 | no |
| KIAA1370  | -0.179509787 | -4.817448095 | 1.79E-06 | 6.63E-06 | no |
| TUBGCP3   | -0.179504469 | -4.817300632 | 1.79E-06 | 6.63E-06 | no |
| MCM5      | 0.179483641  | 4.816723072  | 1.79E-06 | 6.65E-06 | no |
| PEX16     | -0.179376331 | -4.81374746  | 1.82E-06 | 6.75E-06 | no |
| RPL21     | -0.179364623 | -4.813422825 | 1.82E-06 | 6.76E-06 | no |
| EPN2      | -0.179319089 | -4.81216027  | 1.83E-06 | 6.80E-06 | no |
| THBS4     | 0.179277525  | 4.81100781   | 1.84E-06 | 6.83E-06 | no |
| VWA5B2    | -0.179269259 | -4.810778638 | 1.84E-06 | 6.84E-06 | no |
| ZNF652    | -0.179259603 | -4.810510894 | 1.85E-06 | 6.85E-06 | no |
| GNS       | 0.179259552  | 4.810509497  | 1.85E-06 | 6.85E-06 | no |
| MAP4K5    | -0.179258686 | -4.810485468 | 1.85E-06 | 6.85E-06 | no |
| TFRC      | 0.179256867  | 4.810435055  | 1.85E-06 | 6.85E-06 | no |
| MACROD1   | -0.179198173 | -4.808807705 | 1.86E-06 | 6.90E-06 | no |
| SENP3     | -0.179195697 | -4.808739049 | 1.86E-06 | 6.90E-06 | no |

|           |              |              |          |          |    |
|-----------|--------------|--------------|----------|----------|----|
| CISD2     | 0.179148043  | 4.807417839  | 1.87E-06 | 6.94E-06 | no |
| EIF4G2    | 0.179120823  | 4.80666317   | 1.88E-06 | 6.97E-06 | no |
| PLEKHG1   | 0.179110636  | 4.806380745  | 1.88E-06 | 6.98E-06 | no |
| OSBPL7    | -0.179088275 | -4.80576082  | 1.89E-06 | 7.00E-06 | no |
| FLJ43390  | -0.179066601 | -4.80514357  | 1.89E-06 | 7.01E-06 | no |
| PCDHB19P  | -0.179065304 | -4.805123987 | 1.89E-06 | 7.01E-06 | no |
| FCN3      | 0.17904328   | 4.804513395  | 1.90E-06 | 7.03E-06 | no |
| ARCN1     | 0.179018865  | 4.803836559  | 1.91E-06 | 7.06E-06 | no |
| TRIOBP    | 0.178960934  | 4.802230564  | 1.92E-06 | 7.11E-06 | no |
| SLC01A2   | -0.178954128 | -4.802041898 | 1.92E-06 | 7.11E-06 | no |
| NAP1L1    | -0.178929376 | -4.801355733 | 1.93E-06 | 7.14E-06 | no |
| ZNF124    | 0.178888125  | 4.800212212  | 1.94E-06 | 7.17E-06 | no |
| CLVS2     | -0.178863873 | -4.799539928 | 1.95E-06 | 7.20E-06 | no |
| TRAPPC1   | 0.178808229  | 4.797997495  | 1.96E-06 | 7.25E-06 | no |
| LTA       | 0.178807344  | 4.797972976  | 1.96E-06 | 7.25E-06 | no |
| HNRNPA3   | -0.178784066 | -4.797327705 | 1.97E-06 | 7.27E-06 | no |
| SP2       | -0.178768663 | -4.796900754 | 1.97E-06 | 7.28E-06 | no |
| L1CAM     | -0.178753468 | -4.796479569 | 1.98E-06 | 7.30E-06 | no |
| NUP133    | -0.178733338 | -4.795922778 | 1.98E-06 | 7.32E-06 | no |
| PTCD2     | 0.178724439  | 4.795674932  | 1.98E-06 | 7.32E-06 | no |
| DPM1      | 0.178695251  | 4.794865906  | 1.99E-06 | 7.35E-06 | no |
| SUPT5H    | -0.178651555 | -4.793654762 | 2.00E-06 | 7.39E-06 | no |
| KIAA1210  | 0.178620905  | 4.792805249  | 2.01E-06 | 7.42E-06 | no |
| VAPA      | -0.178620417 | -4.792791717 | 2.01E-06 | 7.42E-06 | no |
| C15orf56  | 0.178617802  | 4.792719247  | 2.01E-06 | 7.42E-06 | no |
| C20orf132 | -0.178601145 | -4.792257574 | 2.02E-06 | 7.44E-06 | no |
| SPARCL1   | -0.178593567 | -4.792047535 | 2.02E-06 | 7.44E-06 | no |
| WNT7B     | -0.178574984 | -4.791532489 | 2.02E-06 | 7.46E-06 | no |
| HBQ1      | -0.178572127 | -4.791453292 | 2.02E-06 | 7.46E-06 | no |
| S100A13   | 0.178556064  | 4.791008093  | 2.03E-06 | 7.48E-06 | no |
| NRG2      | -0.178548415 | -4.790796104 | 2.03E-06 | 7.48E-06 | no |
| SPATS2    | -0.178541706 | -4.790610176 | 2.03E-06 | 7.49E-06 | no |
| WDR66     | 0.178534134  | 4.790400321  | 2.03E-06 | 7.49E-06 | no |
| GLT25D2   | -0.178491873 | -4.789229047 | 2.05E-06 | 7.54E-06 | no |
| POLK      | 0.17848081   | 4.788922442  | 2.05E-06 | 7.54E-06 | no |
| OSR2      | 0.178469319  | 4.788603978  | 2.05E-06 | 7.56E-06 | no |
| LOC150786 | -0.178464584 | -4.788472735 | 2.05E-06 | 7.56E-06 | no |
| HDHD2     | -0.178461576 | -4.788389392 | 2.05E-06 | 7.56E-06 | no |
| TAF5      | -0.178439057 | -4.7877653   | 2.06E-06 | 7.58E-06 | no |
| ZNF141    | -0.178418359 | -4.787191666 | 2.07E-06 | 7.60E-06 | no |
| ULBP3     | 0.178413045  | 4.787044418  | 2.07E-06 | 7.61E-06 | no |
| CEACAM1   | 0.178401655  | 4.786728757  | 2.07E-06 | 7.62E-06 | no |
| SEC23A    | 0.178391631  | 4.786450957  | 2.07E-06 | 7.62E-06 | no |
| EID3      | 0.178307845  | 4.784129056  | 2.10E-06 | 7.71E-06 | no |
| PNMA2     | -0.178296137 | -4.783804603 | 2.10E-06 | 7.72E-06 | no |
| LOC339047 | -0.178288043 | -4.783580285 | 2.10E-06 | 7.73E-06 | no |
| NAT8B     | 0.178267579  | 4.783013215  | 2.11E-06 | 7.75E-06 | no |
| TBC1D2    | 0.178256465  | 4.78270522   | 2.11E-06 | 7.76E-06 | no |
| IPO7      | -0.178212986 | -4.781500394 | 2.12E-06 | 7.80E-06 | no |
| WDR33     | -0.178187374 | -4.780790677 | 2.13E-06 | 7.83E-06 | no |
| YJEFN3    | -0.178183596 | -4.78068601  | 2.13E-06 | 7.83E-06 | no |

|           |              |              |          |          |    |
|-----------|--------------|--------------|----------|----------|----|
| SFXN2     | 0.178171914  | 4.780362303  | 2.14E-06 | 7.84E-06 | no |
| RGS2      | 0.178146837  | 4.779667429  | 2.14E-06 | 7.86E-06 | no |
| ANKRD32   | 0.178119469  | 4.778909066  | 2.15E-06 | 7.89E-06 | no |
| C3orf58   | 0.178099808  | 4.778364289  | 2.16E-06 | 7.91E-06 | no |
| ZNF702P   | 0.178091393  | 4.778131113  | 2.16E-06 | 7.92E-06 | no |
| TGFB2     | 0.178083807  | 4.777920943  | 2.16E-06 | 7.92E-06 | no |
| ZNF704    | -0.178083629 | -4.777915991 | 2.16E-06 | 7.92E-06 | no |
| WDR20     | -0.178076552 | -4.777719921 | 2.16E-06 | 7.93E-06 | no |
| ATN1      | -0.178073358 | -4.777631406 | 2.16E-06 | 7.93E-06 | no |
| ADIPOR1   | 0.178069816  | 4.777533254  | 2.16E-06 | 7.93E-06 | no |
| LOC84931  | 0.178055599  | 4.777139339  | 2.17E-06 | 7.95E-06 | no |
| TTC30B    | 0.178027714  | 4.776366723  | 2.18E-06 | 7.97E-06 | no |
| RIMKLB    | -0.177994254 | -4.775439619 | 2.19E-06 | 8.01E-06 | no |
| LOC400043 | 0.177978207  | 4.77499501   | 2.19E-06 | 8.02E-06 | no |
| TUG1      | -0.177972939 | -4.774849049 | 2.19E-06 | 8.03E-06 | no |
| LRP11     | -0.177951632 | -4.774258712 | 2.20E-06 | 8.05E-06 | no |
| C5orf42   | -0.177951167 | -4.774245833 | 2.20E-06 | 8.05E-06 | no |
| GK3P      | 0.177949289  | 4.774193804  | 2.20E-06 | 8.05E-06 | no |
| TMEM97    | -0.177912083 | -4.77316296  | 2.21E-06 | 8.09E-06 | no |
| CD47      | 0.177890482  | 4.772564502  | 2.22E-06 | 8.11E-06 | no |
| NEURL3    | 0.177867947  | 4.771940169  | 2.22E-06 | 8.13E-06 | no |
| GCLC      | -0.177859378 | -4.771702745 | 2.23E-06 | 8.14E-06 | no |
| LOC440957 | 0.177810575  | 4.77035068   | 2.24E-06 | 8.19E-06 | no |
| ENPP1     | 0.177808731  | 4.770299606  | 2.24E-06 | 8.19E-06 | no |
| RPL17     | -0.177807614 | -4.770268652 | 2.24E-06 | 8.19E-06 | no |
| ZFAND6    | 0.177749124  | 4.768648266  | 2.26E-06 | 8.26E-06 | no |
| THSD7B    | 0.177692863  | 4.767089694  | 2.28E-06 | 8.32E-06 | no |
| TNR       | -0.177649251 | -4.765881542 | 2.29E-06 | 8.36E-06 | no |
| AP3D1     | -0.177637674 | -4.765560834 | 2.29E-06 | 8.37E-06 | no |
| LRRC59    | 0.177583639  | 4.764063998  | 2.31E-06 | 8.43E-06 | no |
| MAP1D     | -0.17757137  | -4.763724136 | 2.31E-06 | 8.45E-06 | no |
| INPP5B    | 0.177551658  | 4.763178117  | 2.32E-06 | 8.47E-06 | no |
| PPM1L     | -0.177548979 | -4.763103903 | 2.32E-06 | 8.47E-06 | no |
| UNC13D    | 0.177507871  | 4.761965216  | 2.33E-06 | 8.51E-06 | no |
| CCDC153   | 0.177495583  | 4.761624847  | 2.34E-06 | 8.52E-06 | no |
| DCAF6     | 0.177436948  | 4.760000734  | 2.36E-06 | 8.59E-06 | no |
| C6orf62   | 0.177430192  | 4.759813588  | 2.36E-06 | 8.60E-06 | no |
| TXLNB     | 0.177371526  | 4.758188662  | 2.38E-06 | 8.66E-06 | no |
| ESRRB     | 0.177368156  | 4.758095318  | 2.38E-06 | 8.66E-06 | no |
| CCDC18    | 0.177362484  | 4.757938219  | 2.38E-06 | 8.67E-06 | no |
| REX04     | -0.177358078 | -4.757816193 | 2.38E-06 | 8.67E-06 | no |
| KHDRBS3   | -0.177303539 | -4.756305632 | 2.40E-06 | 8.73E-06 | no |
| CPLX2     | -0.177292545 | -4.756001152 | 2.40E-06 | 8.75E-06 | no |
| TNIP3     | 0.177289652  | 4.75592102   | 2.40E-06 | 8.75E-06 | no |
| OXCT1     | -0.177231549 | -4.7543118   | 2.42E-06 | 8.81E-06 | no |
| THEMIS    | 0.177206     | 4.753604224  | 2.43E-06 | 8.84E-06 | no |
| EIF4B     | -0.177195291 | -4.753307646 | 2.43E-06 | 8.85E-06 | no |
| ALPK2     | 0.177163647  | 4.752431278  | 2.44E-06 | 8.89E-06 | no |
| LPHN2     | 0.177161409  | 4.752369295  | 2.44E-06 | 8.89E-06 | no |
| PSMD11    | 0.177127293  | 4.751424491  | 2.45E-06 | 8.93E-06 | no |
| TRIM61    | 0.177119053  | 4.751196284  | 2.46E-06 | 8.94E-06 | no |

|             |              |              |          |          |    |
|-------------|--------------|--------------|----------|----------|----|
| JDP2        | 0.177107032  | 4.750863372  | 2.46E-06 | 8.95E-06 | no |
| NDUFA5      | -0.177106929 | -4.750860534 | 2.46E-06 | 8.95E-06 | no |
| LOC390595   | -0.177088039 | -4.750337403 | 2.47E-06 | 8.97E-06 | no |
| HUWE1       | -0.177075714 | -4.749996079 | 2.47E-06 | 8.98E-06 | no |
| KPNA5       | -0.177068819 | -4.749805134 | 2.47E-06 | 8.99E-06 | no |
| LOC442454   | -0.177056358 | -4.749460055 | 2.48E-06 | 9.00E-06 | no |
| NSUN7       | 0.177053404  | 4.749378251  | 2.48E-06 | 9.00E-06 | no |
| PEX6        | -0.177030155 | -4.748734422 | 2.49E-06 | 9.03E-06 | no |
| SLC25A13    | 0.17694268   | 4.746312093  | 2.51E-06 | 9.13E-06 | no |
| RBBP6       | -0.176940381 | -4.746248442 | 2.52E-06 | 9.13E-06 | no |
| PZP         | 0.17690584   | 4.745291986  | 2.53E-06 | 9.17E-06 | no |
| CDC5L       | -0.176902427 | -4.745197483 | 2.53E-06 | 9.18E-06 | no |
| STAR        | -0.176850008 | -4.743746    | 2.55E-06 | 9.24E-06 | no |
| LOC284749   | 0.176827468  | 4.743121861  | 2.55E-06 | 9.26E-06 | no |
| KEAP1       | -0.176782297 | -4.741871131 | 2.57E-06 | 9.32E-06 | no |
| RILPL1      | -0.17677728  | -4.741732222 | 2.57E-06 | 9.32E-06 | no |
| PSMC5       | -0.176775512 | -4.741683267 | 2.57E-06 | 9.32E-06 | no |
| KIAA1644    | -0.176770751 | -4.741551458 | 2.57E-06 | 9.33E-06 | no |
| FZD7        | 0.176742406  | 4.740766614  | 2.58E-06 | 9.36E-06 | no |
| LRRC58      | -0.176739404 | -4.740683517 | 2.58E-06 | 9.36E-06 | no |
| RCCD1       | -0.176735749 | -4.740582298 | 2.58E-06 | 9.37E-06 | no |
| CYB5D1      | 0.176668907  | 4.738731624  | 2.61E-06 | 9.45E-06 | no |
| OR2H2       | -0.176637561 | -4.737863777 | 2.62E-06 | 9.49E-06 | no |
| NRP2        | 0.176624904  | 4.737513357  | 2.62E-06 | 9.50E-06 | no |
| RRP7B       | -0.176617583 | -4.73731064  | 2.63E-06 | 9.51E-06 | no |
| C19orf39    | 0.176609495  | 4.73708672   | 2.63E-06 | 9.52E-06 | no |
| ATP6V0B     | 0.176523018  | 4.734692579  | 2.66E-06 | 9.62E-06 | no |
| UPF2        | -0.176521034 | -4.734637672 | 2.66E-06 | 9.62E-06 | no |
| VAR52       | -0.17651641  | -4.734509642 | 2.66E-06 | 9.63E-06 | no |
| NARFL       | -0.176511747 | -4.73438056  | 2.66E-06 | 9.63E-06 | no |
| RGS22       | 0.17650563   | 4.734211222  | 2.66E-06 | 9.64E-06 | no |
| RNF115      | 0.176505007  | 4.734193966  | 2.66E-06 | 9.64E-06 | no |
| SNORD115-26 | -0.176500177 | -4.73406026  | 2.67E-06 | 9.64E-06 | no |
| BRPF3       | -0.176481132 | -4.733533011 | 2.67E-06 | 9.66E-06 | no |
| ATAD3C      | 0.176474308  | 4.733344101  | 2.68E-06 | 9.67E-06 | no |
| IL1F8       | 0.176415578  | 4.731718235  | 2.70E-06 | 9.75E-06 | no |
| YIPF2       | 0.176396298  | 4.731184509  | 2.70E-06 | 9.77E-06 | no |
| ADH1C       | 0.176336189  | 4.72952056   | 2.72E-06 | 9.84E-06 | no |
| ZNF28       | 0.176249729  | 4.727127244  | 2.76E-06 | 9.96E-06 | no |
| AMMECR1     | 0.176247529  | 4.727066349  | 2.76E-06 | 9.96E-06 | no |
| DNAH11      | 0.176139633  | 4.724079834  | 2.80E-06 | 1.01E-05 | no |
| METTL7B     | 0.17610888   | 4.723228637  | 2.81E-06 | 1.01E-05 | no |
| RAD9B       | 0.176074488  | 4.722276726  | 2.82E-06 | 1.02E-05 | no |
| PPP1R12B    | -0.176062808 | -4.721953443 | 2.82E-06 | 1.02E-05 | no |
| OTUD7A      | -0.17605892  | -4.721845849 | 2.83E-06 | 1.02E-05 | no |
| DCAKD       | -0.17602899  | -4.721017471 | 2.84E-06 | 1.02E-05 | no |
| C10orf58    | -0.175992526 | -4.720008248 | 2.85E-06 | 1.03E-05 | no |
| ARHGEF3     | 0.175953904  | 4.71893934   | 2.87E-06 | 1.03E-05 | no |
| PTPRD       | -0.175942911 | -4.718635085 | 2.87E-06 | 1.03E-05 | no |
| ERAS        | -0.175941455 | -4.718594786 | 2.87E-06 | 1.03E-05 | no |
| ATL1        | -0.175926392 | -4.718177919 | 2.88E-06 | 1.04E-05 | no |

|              |              |              |          |          |    |
|--------------|--------------|--------------|----------|----------|----|
| ABCA7        | 0.175919457  | 4.717985982  | 2.88E-06 | 1.04E-05 | no |
| MT1A         | 0.17588884   | 4.717138654  | 2.89E-06 | 1.04E-05 | no |
| SUN3         | 0.175864129  | 4.716454772  | 2.90E-06 | 1.04E-05 | no |
| CXorf36      | 0.175856957  | 4.716256303  | 2.90E-06 | 1.05E-05 | no |
| TRIM3        | -0.17585679  | -4.716251684 | 2.90E-06 | 1.05E-05 | no |
| CEP250       | -0.175854839 | -4.716197688 | 2.90E-06 | 1.05E-05 | no |
| C2orf77      | 0.175850269  | 4.716071201  | 2.91E-06 | 1.05E-05 | no |
| CDH26        | 0.175843581  | 4.715886119  | 2.91E-06 | 1.05E-05 | no |
| CMC1         | 0.175834856  | 4.715644466  | 2.91E-06 | 1.05E-05 | no |
| LRRC6        | 0.17582202   | 4.715289431  | 2.92E-06 | 1.05E-05 | no |
| SNTG1        | -0.17581174  | -4.715004949 | 2.92E-06 | 1.05E-05 | no |
| CEP55        | 0.175786628  | 4.71431001   | 2.93E-06 | 1.05E-05 | no |
| ST6GAL2      | -0.175784606 | -4.714254054 | 2.93E-06 | 1.05E-05 | no |
| FEM1C        | 0.17577753   | 4.714058232  | 2.93E-06 | 1.05E-05 | no |
| SERTAD2      | 0.175775776  | 4.714009702  | 2.93E-06 | 1.05E-05 | no |
| IL17RD       | -0.175744974 | -4.713157309 | 2.95E-06 | 1.06E-05 | no |
| NADSYN1      | 0.175724382  | 4.712587486  | 2.95E-06 | 1.06E-05 | no |
| ARF3         | -0.175701606 | -4.711957207 | 2.96E-06 | 1.06E-05 | no |
| CHPT1        | 0.17568829   | 4.711588737  | 2.97E-06 | 1.07E-05 | no |
| LOC100133612 | 0.175685273  | 4.711505244  | 2.97E-06 | 1.07E-05 | no |
| NACAP1       | -0.175679991 | -4.711359078 | 2.97E-06 | 1.07E-05 | no |
| EXD2         | -0.175652493 | -4.710598155 | 2.98E-06 | 1.07E-05 | no |
| TP53RK       | 0.175634875  | 4.710110656  | 2.99E-06 | 1.07E-05 | no |
| ULBP2        | 0.175631584  | 4.71001959   | 2.99E-06 | 1.07E-05 | no |
| ECHDC2       | 0.175628577  | 4.709936378  | 2.99E-06 | 1.07E-05 | no |
| RAF1         | -0.175624069 | -4.709811629 | 2.99E-06 | 1.07E-05 | no |
| EHD3         | -0.175624018 | -4.709810234 | 2.99E-06 | 1.07E-05 | no |
| LONRF2       | -0.17562262  | -4.709771541 | 2.99E-06 | 1.07E-05 | no |
| TCTEX1D1     | 0.175607185  | 4.709344423  | 3.00E-06 | 1.08E-05 | no |
| SCO2         | 0.175570832  | 4.708338536  | 3.01E-06 | 1.08E-05 | no |
| CACNA1D      | -0.175521869 | -4.706983741 | 3.03E-06 | 1.09E-05 | no |
| LOC134466    | -0.175506383 | -4.70655525  | 3.04E-06 | 1.09E-05 | no |
| PHC2         | 0.175482043  | 4.705881763  | 3.05E-06 | 1.09E-05 | no |
| GATA6        | 0.175464837  | 4.705405699  | 3.06E-06 | 1.10E-05 | no |
| STXBP1       | -0.175457059 | -4.705190504 | 3.06E-06 | 1.10E-05 | no |
| CKMT1A       | -0.175440565 | -4.704734145 | 3.07E-06 | 1.10E-05 | no |
| RASGEF1C     | -0.175423517 | -4.704262451 | 3.07E-06 | 1.10E-05 | no |
| ERO1LB       | -0.175412373 | -4.70395413  | 3.08E-06 | 1.10E-05 | no |
| LYPD3        | 0.175358197  | 4.702455205  | 3.10E-06 | 1.11E-05 | no |
| DKFZp6860241 | -0.175356518 | -4.702408756 | 3.10E-06 | 1.11E-05 | no |
| LRFN4        | -0.175274109 | -4.700128796 | 3.13E-06 | 1.12E-05 | no |
| KIF21A       | -0.175235394 | -4.699057719 | 3.15E-06 | 1.13E-05 | no |
| HDAC6        | -0.175229838 | -4.698904023 | 3.15E-06 | 1.13E-05 | no |
| RBM23        | -0.175219873 | -4.69862834  | 3.16E-06 | 1.13E-05 | no |
| C14orf1      | -0.17519282  | -4.697879914 | 3.17E-06 | 1.13E-05 | no |
| UACA         | 0.175177359  | 4.697452189  | 3.17E-06 | 1.13E-05 | no |
| RAB24        | -0.175150783 | -4.696716985 | 3.19E-06 | 1.14E-05 | no |
| GLOD4        | -0.175148924 | -4.696665552 | 3.19E-06 | 1.14E-05 | no |
| MRPL34       | 0.175138133  | 4.696367043  | 3.19E-06 | 1.14E-05 | no |
| LOC440040    | -0.175135159 | -4.696284773 | 3.19E-06 | 1.14E-05 | no |
| INSM2        | -0.175128838 | -4.696109897 | 3.19E-06 | 1.14E-05 | no |



|           |              |              |          |             |
|-----------|--------------|--------------|----------|-------------|
| TPT1      | 0.17512184   | 4.695916319  | 3.20E-06 | 1.14E-05 no |
| MDN1      | -0.175101803 | -4.69536204  | 3.21E-06 | 1.14E-05 no |
| BMPR2     | -0.17507625  | -4.694655164 | 3.22E-06 | 1.15E-05 no |
| MST1      | -0.175051593 | -4.693973073 | 3.23E-06 | 1.15E-05 no |
| CPSF6     | -0.175036118 | -4.693544997 | 3.23E-06 | 1.15E-05 no |
| ZMYM2     | -0.175012357 | -4.692887718 | 3.24E-06 | 1.16E-05 no |
| HRSP12    | -0.174990967 | -4.692296031 | 3.25E-06 | 1.16E-05 no |
| FGFBP3    | -0.174985244 | -4.692137742 | 3.25E-06 | 1.16E-05 no |
| MMP25     | 0.174976385  | 4.691892691  | 3.26E-06 | 1.16E-05 no |
| NECAB3    | -0.174962355 | -4.691504601 | 3.26E-06 | 1.16E-05 no |
| IVD       | -0.174929545 | -4.690597044 | 3.28E-06 | 1.17E-05 no |
| BEST3     | -0.174918103 | -4.690280536 | 3.28E-06 | 1.17E-05 no |
| LOC283174 | -0.17486928  | -4.68893011  | 3.30E-06 | 1.18E-05 no |
| C8orf55   | -0.174861539 | -4.688715989 | 3.31E-06 | 1.18E-05 no |
| LSM10     | 0.17483055   | 4.687858848  | 3.32E-06 | 1.18E-05 no |
| C4orf33   | 0.17481998   | 4.687566492  | 3.33E-06 | 1.18E-05 no |
| ZHX3      | -0.174819019 | -4.687539914 | 3.33E-06 | 1.18E-05 no |
| NPTXR     | -0.174810726 | -4.687310544 | 3.33E-06 | 1.19E-05 no |
| PMAIP1    | 0.17477635   | 4.686359746  | 3.35E-06 | 1.19E-05 no |
| MOXD1     | 0.174738956  | 4.685325511  | 3.36E-06 | 1.20E-05 no |
| RAD21     | -0.17470382  | -4.684353737 | 3.38E-06 | 1.20E-05 no |
| LOC729467 | 0.174680967  | 4.683721677  | 3.39E-06 | 1.21E-05 no |
| HRASLS2   | 0.174661067  | 4.683171301  | 3.40E-06 | 1.21E-05 no |
| RWDD2A    | -0.174640256 | -4.682595759 | 3.41E-06 | 1.21E-05 no |
| MVK       | -0.174633655 | -4.682413198 | 3.41E-06 | 1.21E-05 no |
| MT1H      | 0.174630353  | 4.682321868  | 3.41E-06 | 1.21E-05 no |
| C1orf69   | -0.174629988 | -4.682311764 | 3.41E-06 | 1.21E-05 no |
| PNN       | -0.174604396 | -4.681604009 | 3.42E-06 | 1.22E-05 no |
| RAET1K    | 0.174580204  | 4.680934965  | 3.43E-06 | 1.22E-05 no |
| SACS      | -0.174579456 | -4.68091427  | 3.43E-06 | 1.22E-05 no |
| SHANK3    | -0.174548996 | -4.680071892 | 3.45E-06 | 1.22E-05 no |
| TMEM55B   | -0.174533928 | -4.679655198 | 3.45E-06 | 1.23E-05 no |
| MTRF1L    | -0.174533213 | -4.67963542  | 3.45E-06 | 1.23E-05 no |
| IPP       | 0.174505206  | 4.678860894  | 3.47E-06 | 1.23E-05 no |
| VSX2      | -0.174499969 | -4.678716078 | 3.47E-06 | 1.23E-05 no |
| MMADHC    | 0.174491361  | 4.678478021  | 3.47E-06 | 1.23E-05 no |
| FAM168A   | -0.174472641 | -4.677960349 | 3.48E-06 | 1.24E-05 no |
| TSNAX     | 0.174469     | 4.677859665  | 3.48E-06 | 1.24E-05 no |
| ZNF700    | 0.174376303  | 4.675296317  | 3.52E-06 | 1.25E-05 no |
| RNF38     | -0.174362247 | -4.674907613 | 3.53E-06 | 1.25E-05 no |
| WNK2      | -0.174322927 | -4.673820354 | 3.55E-06 | 1.26E-05 no |
| CCDC116   | -0.174317305 | -4.67366491  | 3.55E-06 | 1.26E-05 no |
| ESM1      | 0.17430712   | 4.67338327   | 3.56E-06 | 1.26E-05 no |
| ATP2B2    | -0.174247011 | -4.671721203 | 3.58E-06 | 1.27E-05 no |
| PEG3      | -0.174240951 | -4.671553636 | 3.59E-06 | 1.27E-05 no |
| LENG9     | 0.174237299  | 4.671452669  | 3.59E-06 | 1.27E-05 no |
| BPTF      | -0.174225833 | -4.671135635 | 3.59E-06 | 1.27E-05 no |
| NEIL2     | -0.174168391 | -4.669547371 | 3.62E-06 | 1.28E-05 no |
| ENOSF1    | 0.174127912  | 4.66842816   | 3.64E-06 | 1.29E-05 no |
| SIRT3     | -0.174121744 | -4.668257635 | 3.64E-06 | 1.29E-05 no |
| EGR2      | 0.174073336  | 4.666919249  | 3.67E-06 | 1.30E-05 no |

|         |              |              |          |          |    |
|---------|--------------|--------------|----------|----------|----|
| PSMA4   | 0.174053491  | 4.666370568  | 3.68E-06 | 1.30E-05 | no |
| RPP30   | -0.174051294 | -4.666309839 | 3.68E-06 | 1.30E-05 | no |
| CCDC88A | -0.174008279 | -4.665120593 | 3.70E-06 | 1.31E-05 | no |
| DACH2   | -0.173994553 | -4.664741099 | 3.70E-06 | 1.31E-05 | no |
| TM4SF20 | -0.173982767 | -4.664415253 | 3.71E-06 | 1.31E-05 | no |
| AFP     | 0.173965439  | 4.663936208  | 3.72E-06 | 1.32E-05 | no |
| TSPAN17 | 0.173961019  | 4.663814008  | 3.72E-06 | 1.32E-05 | no |
| TSLP    | 0.173945775  | 4.663392571  | 3.73E-06 | 1.32E-05 | no |
| COG4    | -0.173942165 | -4.663292763 | 3.73E-06 | 1.32E-05 | no |
| EGLN1   | -0.173920811 | -4.662702414 | 3.74E-06 | 1.32E-05 | no |
| ZXDB    | -0.173852693 | -4.660819295 | 3.77E-06 | 1.33E-05 | no |
| PANK4   | -0.17384743  | -4.66067379  | 3.78E-06 | 1.33E-05 | no |
| NME6    | 0.173835562  | 4.660345713  | 3.78E-06 | 1.34E-05 | no |
| PFAS    | -0.173784061 | -4.658922039 | 3.81E-06 | 1.34E-05 | no |
| MMAB    | -0.173714507 | -4.65699934  | 3.84E-06 | 1.36E-05 | no |
| C1QTNF9 | 0.173702394  | 4.65666452   | 3.85E-06 | 1.36E-05 | no |
| DAB2IP  | -0.173665271 | -4.655638355 | 3.87E-06 | 1.37E-05 | no |
| PPY     | 0.173662423  | 4.655559628  | 3.87E-06 | 1.37E-05 | no |
| MIOS    | 0.173652391  | 4.655282324  | 3.87E-06 | 1.37E-05 | no |
| ZMAT1   | -0.173645295 | -4.655086193 | 3.88E-06 | 1.37E-05 | no |
| WDR27   | -0.173645108 | -4.655081014 | 3.88E-06 | 1.37E-05 | no |
| CAMTA1  | -0.173626958 | -4.654579341 | 3.89E-06 | 1.37E-05 | no |
| TP53TG1 | 0.173621251  | 4.654421586  | 3.89E-06 | 1.37E-05 | no |
| PIRT    | 0.173596027  | 4.653724377  | 3.90E-06 | 1.38E-05 | no |
| ATG2B   | -0.173592812 | -4.653635509 | 3.90E-06 | 1.38E-05 | no |
| ARID1B  | -0.173592647 | -4.653630934 | 3.90E-06 | 1.38E-05 | no |
| DNALI1  | 0.173591112  | 4.653588514  | 3.90E-06 | 1.38E-05 | no |
| PAK3    | -0.173577032 | -4.653199345 | 3.91E-06 | 1.38E-05 | no |
| CACNA1E | -0.173575781 | -4.65316475  | 3.91E-06 | 1.38E-05 | no |
| HSPA12A | -0.173574797 | -4.653137567 | 3.91E-06 | 1.38E-05 | no |
| ECHDC1  | 0.173554495  | 4.652576398  | 3.92E-06 | 1.38E-05 | no |
| MFS6    | -0.173527751 | -4.651837198 | 3.94E-06 | 1.39E-05 | no |
| SEC61A2 | -0.173493836 | -4.650899807 | 3.95E-06 | 1.39E-05 | no |
| DUSP9   | -0.173470321 | -4.650249882 | 3.97E-06 | 1.40E-05 | no |
| ARID4A  | -0.173467654 | -4.650176164 | 3.97E-06 | 1.40E-05 | no |
| WBSCR16 | 0.173441145  | 4.649443482  | 3.98E-06 | 1.40E-05 | no |
| FAT3    | -0.173416659 | -4.64876674  | 3.99E-06 | 1.40E-05 | no |
| LASS3   | 0.173381046  | 4.647782484  | 4.01E-06 | 1.41E-05 | no |
| FAM40A  | -0.173331715 | -4.646419098 | 4.04E-06 | 1.42E-05 | no |
| CCDC103 | 0.173320801  | 4.646117487  | 4.04E-06 | 1.42E-05 | no |
| AGPAT4  | -0.173288979 | -4.645238038 | 4.06E-06 | 1.43E-05 | no |
| ABHD11  | 0.173282141  | 4.64504906   | 4.06E-06 | 1.43E-05 | no |
| PRLHR   | -0.173263705 | -4.644539547 | 4.07E-06 | 1.43E-05 | no |
| CYB5R1  | 0.17325345   | 4.644256154  | 4.08E-06 | 1.43E-05 | no |
| EGOT    | 0.1732504    | 4.644171857  | 4.08E-06 | 1.43E-05 | no |
| LYST    | 0.173239981  | 4.64388392   | 4.09E-06 | 1.44E-05 | no |
| SRP19   | 0.173238581  | 4.643845247  | 4.09E-06 | 1.44E-05 | no |
| PVR     | 0.173180279  | 4.642234066  | 4.12E-06 | 1.45E-05 | no |
| FBX034  | -0.173129892 | -4.640841646 | 4.15E-06 | 1.46E-05 | no |
| IGSF21  | -0.173116897 | -4.640482546 | 4.15E-06 | 1.46E-05 | no |
| ACTN2   | -0.173111566 | -4.640335226 | 4.16E-06 | 1.46E-05 | no |

|              |              |              |          |          |    |
|--------------|--------------|--------------|----------|----------|----|
| SUM01P3      | 0.173068625  | 4.639148649  | 4.18E-06 | 1.47E-05 | no |
| PLA2G2C      | 0.173068248  | 4.63913821   | 4.18E-06 | 1.47E-05 | no |
| ESPNL        | 0.173066577  | 4.639092061  | 4.18E-06 | 1.47E-05 | no |
| NAE1         | -0.173023511 | -4.637902032 | 4.20E-06 | 1.47E-05 | no |
| DDHD2        | -0.173019929 | -4.637803043 | 4.21E-06 | 1.47E-05 | no |
| C4orf36      | 0.173000446  | 4.637264689  | 4.22E-06 | 1.48E-05 | no |
| PLAGL1       | 0.17298321   | 4.636788435  | 4.23E-06 | 1.48E-05 | no |
| PDE4A        | -0.172982638 | -4.636772632 | 4.23E-06 | 1.48E-05 | no |
| SMARCD1      | -0.172961904 | -4.636199719 | 4.24E-06 | 1.48E-05 | no |
| IGSF8        | -0.172948054 | -4.63581702  | 4.24E-06 | 1.49E-05 | no |
| TTYH3        | 0.172907428  | 4.634694487  | 4.27E-06 | 1.49E-05 | no |
| MRPL36       | 0.172902143  | 4.634548465  | 4.27E-06 | 1.50E-05 | no |
| GRB2         | 0.172883807  | 4.634041837  | 4.28E-06 | 1.50E-05 | no |
| SDAD1        | 0.172851831  | 4.633158346  | 4.30E-06 | 1.50E-05 | no |
| TNFRSF8      | 0.172844526  | 4.632956506  | 4.30E-06 | 1.51E-05 | no |
| PTX3         | 0.172838801  | 4.63279832   | 4.31E-06 | 1.51E-05 | no |
| SLC38A1      | -0.172826886 | -4.632469107 | 4.31E-06 | 1.51E-05 | no |
| DHX9         | -0.172797962 | -4.63166998  | 4.33E-06 | 1.51E-05 | no |
| C7orf28A     | 0.172745396  | 4.630217647  | 4.36E-06 | 1.52E-05 | no |
| CHPF         | 0.172722301  | 4.629579587  | 4.37E-06 | 1.53E-05 | no |
| LOC730811    | -0.172673874 | -4.628241663 | 4.40E-06 | 1.54E-05 | no |
| MYLPF        | 0.172657058  | 4.627777091  | 4.41E-06 | 1.54E-05 | no |
| ZNF720       | -0.17265598  | -4.62774731  | 4.41E-06 | 1.54E-05 | no |
| WWP2         | -0.172639017 | -4.627278672 | 4.42E-06 | 1.54E-05 | no |
| MYL6         | 0.172621492  | 4.626794507  | 4.43E-06 | 1.55E-05 | no |
| DDIT4L       | 0.172614527  | 4.626602094  | 4.43E-06 | 1.55E-05 | no |
| HCFC1        | -0.172590846 | -4.625947895 | 4.45E-06 | 1.55E-05 | no |
| CABLES1      | -0.172577281 | -4.625573133 | 4.45E-06 | 1.56E-05 | no |
| 5-Sep        | -0.172571547 | -4.62541473  | 4.46E-06 | 1.56E-05 | no |
| PKD1         | -0.172557992 | -4.625040278 | 4.46E-06 | 1.56E-05 | no |
| SYN1         | -0.172542832 | -4.624621475 | 4.47E-06 | 1.56E-05 | no |
| A4GNT        | 0.172542337  | 4.624607798  | 4.47E-06 | 1.56E-05 | no |
| FAM149A      | -0.172519454 | -4.623975661 | 4.49E-06 | 1.57E-05 | no |
| PSMC4        | 0.172484857  | 4.623019945  | 4.51E-06 | 1.57E-05 | no |
| SLC25A44     | -0.172456187 | -4.622227939 | 4.52E-06 | 1.58E-05 | no |
| SRFBP1       | 0.172454021  | 4.622168107  | 4.53E-06 | 1.58E-05 | no |
| SPTLC3       | 0.172433263  | 4.621594701  | 4.54E-06 | 1.58E-05 | no |
| ANKRD53      | 0.172407061  | 4.620870919  | 4.55E-06 | 1.59E-05 | no |
| CSRNP3       | -0.172390522 | -4.62041405  | 4.56E-06 | 1.59E-05 | no |
| MMP12        | 0.172353272  | 4.619385121  | 4.58E-06 | 1.60E-05 | no |
| NUP62        | 0.172353182  | 4.619382629  | 4.58E-06 | 1.60E-05 | no |
| ZNF418       | -0.172330163 | -4.618746799 | 4.60E-06 | 1.60E-05 | no |
| MGMT         | 0.17228698   | 4.617553999  | 4.62E-06 | 1.61E-05 | no |
| HIST2H2BF    | 0.172261159  | 4.616840791  | 4.64E-06 | 1.62E-05 | no |
| TMEM194A     | 0.172233491  | 4.616076591  | 4.66E-06 | 1.62E-05 | no |
| LOC100303728 | -0.172225716 | -4.615861832 | 4.66E-06 | 1.62E-05 | no |
| NRL          | -0.172178348 | -4.614553515 | 4.69E-06 | 1.63E-05 | no |
| S100A5       | 0.172175766  | 4.614482205  | 4.69E-06 | 1.63E-05 | no |
| PKM2         | 0.172170723  | 4.61434293   | 4.69E-06 | 1.63E-05 | no |
| PCGF6        | -0.172155118 | -4.61391193  | 4.70E-06 | 1.64E-05 | no |
| EPHA2        | 0.172132135  | 4.61327713   | 4.72E-06 | 1.64E-05 | no |

|           |              |              |          |          |    |
|-----------|--------------|--------------|----------|----------|----|
| ADAM29    | -0.172106243 | -4.612562041 | 4.73E-06 | 1.65E-05 | no |
| ZWILCH    | 0.172063965  | 4.61139439   | 4.76E-06 | 1.65E-05 | no |
| C20orf108 | 0.172060894  | 4.611309566  | 4.76E-06 | 1.65E-05 | no |
| CRKL      | -0.172032431 | -4.610523467 | 4.78E-06 | 1.66E-05 | no |
| SRRM2     | -0.172029365 | -4.610438788 | 4.78E-06 | 1.66E-05 | no |
| CHD9      | -0.172012616 | -4.609976249 | 4.79E-06 | 1.66E-05 | no |
| CENPL     | 0.172011419  | 4.609943186  | 4.79E-06 | 1.66E-05 | no |
| CCDC42    | 0.171990987  | 4.609378891  | 4.80E-06 | 1.67E-05 | no |
| LOC342346 | -0.171977887 | -4.609017128 | 4.81E-06 | 1.67E-05 | no |
| C7orf29   | 0.171970485  | 4.608812695  | 4.82E-06 | 1.67E-05 | no |
| MITD1     | 0.171962674  | 4.608596982  | 4.82E-06 | 1.67E-05 | no |
| CHCHD6    | -0.171944395 | -4.608092187 | 4.83E-06 | 1.68E-05 | no |
| ZNF483    | -0.171942663 | -4.608044344 | 4.83E-06 | 1.68E-05 | no |
| BCHE      | -0.171933882 | -4.60780185  | 4.84E-06 | 1.68E-05 | no |
| OR5B21    | 0.171925475  | 4.607569691  | 4.84E-06 | 1.68E-05 | no |
| TBC1D14   | -0.171906943 | -4.607057899 | 4.86E-06 | 1.68E-05 | no |
| FOLR4     | 0.171874465  | 4.606161011  | 4.88E-06 | 1.69E-05 | no |
| TMEM48    | 0.171872702  | 4.606112317  | 4.88E-06 | 1.69E-05 | no |
| NXN       | -0.171872045 | -4.606094179 | 4.88E-06 | 1.69E-05 | no |
| LPCAT3    | 0.171861673  | 4.605807743  | 4.88E-06 | 1.69E-05 | no |
| C3orf67   | 0.171822809  | 4.604734538  | 4.91E-06 | 1.70E-05 | no |
| RGR       | -0.171819425 | -4.604641075 | 4.91E-06 | 1.70E-05 | no |
| LCA5L     | 0.171795512  | 4.603980752  | 4.93E-06 | 1.71E-05 | no |
| DCTN1     | -0.171762083 | -4.603057635 | 4.95E-06 | 1.71E-05 | no |
| SFRS13A   | 0.171754414  | 4.602845854  | 4.95E-06 | 1.72E-05 | no |
| CYB5R3    | 0.171743878  | 4.602554936  | 4.96E-06 | 1.72E-05 | no |
| FAM46B    | 0.171724048  | 4.602007361  | 4.97E-06 | 1.72E-05 | no |
| HEXDC     | -0.171665676 | -4.600395541 | 5.01E-06 | 1.73E-05 | no |
| DAAM2     | -0.171631525 | -4.599452565 | 5.03E-06 | 1.74E-05 | no |
| LRP3      | -0.171619943 | -4.599132762 | 5.04E-06 | 1.74E-05 | no |
| KLRG1     | 0.171594287  | 4.598424376  | 5.06E-06 | 1.75E-05 | no |
| NHEDC1    | -0.171578327 | -4.597983711 | 5.07E-06 | 1.75E-05 | no |
| TRIAP1    | 0.171573621  | 4.597853752  | 5.07E-06 | 1.75E-05 | no |
| TRIM15    | 0.171551852  | 4.597252694  | 5.08E-06 | 1.76E-05 | no |
| MRPL32    | 0.171544429  | 4.597047756  | 5.09E-06 | 1.76E-05 | no |
| STARD13   | 0.171523903  | 4.596481017  | 5.10E-06 | 1.76E-05 | no |
| RANBP3    | -0.171520438 | -4.596385353 | 5.10E-06 | 1.76E-05 | no |
| SLC25A21  | -0.171465324 | -4.594863666 | 5.14E-06 | 1.78E-05 | no |
| EPC2      | -0.171426888 | -4.593802493 | 5.17E-06 | 1.78E-05 | no |
| ASMTL     | -0.17138214  | -4.592567059 | 5.20E-06 | 1.79E-05 | no |
| C17orf64  | 0.17137879   | 4.592474579  | 5.20E-06 | 1.80E-05 | no |
| CLYBL     | 0.171320146  | 4.59085554   | 5.24E-06 | 1.81E-05 | no |
| GSPT2     | -0.171308882 | -4.590544584 | 5.24E-06 | 1.81E-05 | no |
| GRIN3A    | -0.171298891 | -4.590268766 | 5.25E-06 | 1.81E-05 | no |
| C16orf87  | -0.171296576 | -4.590204845 | 5.25E-06 | 1.81E-05 | no |
| LIN54     | -0.171284499 | -4.589871452 | 5.26E-06 | 1.82E-05 | no |
| PIR       | 0.171259455  | 4.589180072  | 5.28E-06 | 1.82E-05 | no |
| TOLLIP    | -0.171254375 | -4.589039832 | 5.28E-06 | 1.82E-05 | no |
| DDAH1     | -0.171246103 | -4.588811459 | 5.29E-06 | 1.82E-05 | no |
| FHDC1     | -0.171206577 | -4.587720318 | 5.31E-06 | 1.83E-05 | no |
| PNP       | 0.171197028  | 4.587456718  | 5.32E-06 | 1.83E-05 | no |

|          |              |              |          |             |
|----------|--------------|--------------|----------|-------------|
| GFER     | -0.17119482  | -4.587395769 | 5.32E-06 | 1.83E-05 no |
| FLJ37201 | -0.17119257  | -4.587333661 | 5.32E-06 | 1.83E-05 no |
| ZNF37B   | -0.171132951 | -4.585687877 | 5.36E-06 | 1.85E-05 no |
| FAM126B  | -0.171121582 | -4.585374025 | 5.37E-06 | 1.85E-05 no |
| CST6     | 0.171106424  | 4.584955622  | 5.38E-06 | 1.85E-05 no |
| EFNA3    | -0.171085585 | -4.584380368 | 5.40E-06 | 1.86E-05 no |
| MTERFD1  | 0.171052405  | 4.583464492  | 5.42E-06 | 1.87E-05 no |
| C5orf25  | 0.171050003  | 4.58339819   | 5.42E-06 | 1.87E-05 no |
| NSUN4    | 0.170995849  | 4.581903385  | 5.46E-06 | 1.88E-05 no |
| CCDC8    | 0.170981252  | 4.581500454  | 5.47E-06 | 1.88E-05 no |
| ENOPH1   | -0.170972813 | -4.581267535 | 5.48E-06 | 1.88E-05 no |
| SIPA1L1  | 0.170956145  | 4.580807458  | 5.49E-06 | 1.89E-05 no |
| UTP6     | 0.170940851  | 4.580385313  | 5.50E-06 | 1.89E-05 no |
| LRRTM1   | -0.170921783 | -4.579859007 | 5.51E-06 | 1.90E-05 no |
| SHCBP1   | 0.170919306  | 4.579790645  | 5.51E-06 | 1.90E-05 no |
| ADAM28   | 0.170896379  | 4.579157828  | 5.53E-06 | 1.90E-05 no |
| FBXL16   | -0.170891254 | -4.579016362 | 5.53E-06 | 1.90E-05 no |
| SAP30L   | -0.170873801 | -4.578534653 | 5.55E-06 | 1.91E-05 no |
| KIR3DL2  | 0.170865168  | 4.578296372  | 5.55E-06 | 1.91E-05 no |
| RRP12    | -0.17083933  | -4.57758325  | 5.57E-06 | 1.91E-05 no |
| TRIM43   | 0.170820763  | 4.577070802  | 5.58E-06 | 1.92E-05 no |
| ZNF655   | 0.170819752  | 4.577042882  | 5.58E-06 | 1.92E-05 no |
| CHTF8    | 0.170806739  | 4.576683719  | 5.59E-06 | 1.92E-05 no |
| GRAPL    | 0.170788116  | 4.576169739  | 5.61E-06 | 1.93E-05 no |
| C5orf35  | 0.170743007  | 4.574924774  | 5.64E-06 | 1.94E-05 no |
| TRNAU1AP | 0.170738572  | 4.57480236   | 5.64E-06 | 1.94E-05 no |
| SMCR8    | 0.170735147  | 4.574707848  | 5.64E-06 | 1.94E-05 no |
| DCAF5    | -0.170728856 | -4.574534211 | 5.65E-06 | 1.94E-05 no |
| PHTF2    | 0.170723228  | 4.574378893  | 5.65E-06 | 1.94E-05 no |
| FAM5C    | -0.170669648 | -4.572900185 | 5.69E-06 | 1.95E-05 no |
| GABRD    | -0.170667759 | -4.572848047 | 5.69E-06 | 1.95E-05 no |
| C13orf34 | 0.170656793  | 4.572545428  | 5.70E-06 | 1.96E-05 no |
| CAPN6    | 0.170653759  | 4.57246169   | 5.70E-06 | 1.96E-05 no |
| WT1      | 0.170653627  | 4.572458061  | 5.70E-06 | 1.96E-05 no |
| MYT1L    | -0.170638274 | -4.572034357 | 5.71E-06 | 1.96E-05 no |
| TSPAN11  | -0.170598832 | -4.570945853 | 5.74E-06 | 1.97E-05 no |
| ACOX1    | -0.17056969  | -4.570141653 | 5.77E-06 | 1.98E-05 no |
| MYO16    | -0.170521206 | -4.568803683 | 5.80E-06 | 1.99E-05 no |
| ZNF212   | -0.170468754 | -4.567356275 | 5.84E-06 | 2.00E-05 no |
| GCAT     | -0.170463016 | -4.567197915 | 5.84E-06 | 2.00E-05 no |
| HECTD1   | -0.170372081 | -4.564688646 | 5.91E-06 | 2.02E-05 no |
| SLC7A14  | -0.170354695 | -4.564208914 | 5.93E-06 | 2.03E-05 no |
| HSF4     | -0.170333949 | -4.563636474 | 5.94E-06 | 2.03E-05 no |
| PRELID2  | 0.170258059  | 4.56154251   | 6.00E-06 | 2.05E-05 no |
| ZNF714   | -0.170247364 | -4.561247407 | 6.01E-06 | 2.06E-05 no |
| FAM117A  | 0.1702391    | 4.561019395  | 6.01E-06 | 2.06E-05 no |
| ZMIZ2    | -0.170136585 | -4.55819092  | 6.09E-06 | 2.08E-05 no |
| NUBP1    | 0.170127437  | 4.557938521  | 6.10E-06 | 2.09E-05 no |
| ARPC1A   | 0.170067081  | 4.556273342  | 6.15E-06 | 2.10E-05 no |
| LRRC70   | 0.170062499  | 4.556146939  | 6.15E-06 | 2.10E-05 no |
| CDK5RAP1 | -0.17005316  | -4.555889275 | 6.16E-06 | 2.10E-05 no |

|              |              |              |          |             |
|--------------|--------------|--------------|----------|-------------|
| PRIC285      | 0.169982371  | 4.553936334  | 6.21E-06 | 2.12E-05 no |
| SULF1        | 0.169981902  | 4.553923404  | 6.21E-06 | 2.12E-05 no |
| ADAM15       | 0.169924781  | 4.552347589  | 6.26E-06 | 2.14E-05 no |
| SRRM3        | -0.169911012 | -4.551967746 | 6.27E-06 | 2.14E-05 no |
| ZNF396       | 0.169907472  | 4.551870086  | 6.27E-06 | 2.14E-05 no |
| WDR69        | 0.169889038  | 4.551361537  | 6.29E-06 | 2.15E-05 no |
| ERAL1        | -0.1698862   | -4.551283253 | 6.29E-06 | 2.15E-05 no |
| LDOC1        | -0.169877606 | -4.551046187 | 6.30E-06 | 2.15E-05 no |
| COBRA1       | -0.1698762   | -4.551007394 | 6.30E-06 | 2.15E-05 no |
| SAR1B        | 0.169872208  | 4.550897275  | 6.30E-06 | 2.15E-05 no |
| SLC30A9      | -0.169845155 | -4.550150998 | 6.32E-06 | 2.16E-05 no |
| PAWR         | 0.169786006  | 4.548519348  | 6.37E-06 | 2.17E-05 no |
| WDR25        | -0.169780843 | -4.548376927 | 6.38E-06 | 2.17E-05 no |
| SNRNP40      | 0.169764059  | 4.547913937  | 6.39E-06 | 2.18E-05 no |
| LHFP         | 0.169650229  | 4.544774076  | 6.48E-06 | 2.21E-05 no |
| ANKRA2       | -0.169648264 | -4.544719884 | 6.48E-06 | 2.21E-05 no |
| FAM81A       | -0.169610107 | -4.543667406 | 6.52E-06 | 2.22E-05 no |
| PDZK1P1      | -0.169609503 | -4.543650737 | 6.52E-06 | 2.22E-05 no |
| ZNF280A      | 0.169592439  | 4.54318008   | 6.53E-06 | 2.22E-05 no |
| DOLPP1       | -0.169587001 | -4.54303009  | 6.53E-06 | 2.23E-05 no |
| DKFZp434J022 | -0.169584053 | -4.542948781 | 6.54E-06 | 2.23E-05 no |
| FAM169A      | -0.169575737 | -4.542719394 | 6.54E-06 | 2.23E-05 no |
| POLE4        | 0.169566892  | 4.542475445  | 6.55E-06 | 2.23E-05 no |
| CARM1        | 0.169561083  | 4.542315229  | 6.56E-06 | 2.23E-05 no |
| C1orf21      | -0.169550819 | -4.542032131 | 6.56E-06 | 2.23E-05 no |
| DUSP3        | 0.169524648  | 4.541310299  | 6.59E-06 | 2.24E-05 no |
| LOC158376    | 0.169522041  | 4.54123838   | 6.59E-06 | 2.24E-05 no |
| C14orf174    | 0.169521051  | 4.541211075  | 6.59E-06 | 2.24E-05 no |
| KRTAP5-7     | -0.169516715 | -4.541091505 | 6.59E-06 | 2.24E-05 no |
| CPT2         | 0.169510203  | 4.540911888  | 6.60E-06 | 2.24E-05 no |
| PPCDC        | 0.169498737  | 4.540595646  | 6.61E-06 | 2.25E-05 no |
| RGS9         | -0.169459251 | -4.539506612 | 6.64E-06 | 2.26E-05 no |
| PGRMC2       | 0.169429821  | 4.538694911  | 6.67E-06 | 2.27E-05 no |
| USH1C        | -0.169426718 | -4.538609345 | 6.67E-06 | 2.27E-05 no |
| C11orf42     | -0.169417634 | -4.538358821 | 6.68E-06 | 2.27E-05 no |
| SOCS6        | 0.169410432  | 4.538160189  | 6.68E-06 | 2.27E-05 no |
| IL1RL2       | 0.169409861  | 4.53814443   | 6.68E-06 | 2.27E-05 no |
| POTEF        | 0.169362265  | 4.53683179   | 6.72E-06 | 2.28E-05 no |
| LRRC55       | 0.169348747  | 4.536458955  | 6.74E-06 | 2.29E-05 no |
| IQSEC3       | -0.169322857 | -4.535744953 | 6.76E-06 | 2.29E-05 no |
| ARHGAP5      | -0.169298604 | -4.535076119 | 6.78E-06 | 2.30E-05 no |
| C11orf41     | -0.169288277 | -4.534791308 | 6.79E-06 | 2.30E-05 no |
| TFAP2E       | -0.1692845   | -4.534687149 | 6.79E-06 | 2.30E-05 no |
| HMGB3        | -0.169262841 | -4.534089862 | 6.81E-06 | 2.31E-05 no |
| C16orf89     | 0.169233073  | 4.533268951  | 6.83E-06 | 2.32E-05 no |
| CCDC65       | 0.169226195  | 4.53307926   | 6.84E-06 | 2.32E-05 no |
| SFRS5        | -0.169202158 | -4.532416395 | 6.86E-06 | 2.33E-05 no |
| MIPOL1       | -0.169188794 | -4.53204786  | 6.87E-06 | 2.33E-05 no |
| UBAP1        | -0.169178654 | -4.531768242 | 6.88E-06 | 2.33E-05 no |
| TTL          | 0.169172878  | 4.531608958  | 6.89E-06 | 2.33E-05 no |
| SYT4         | -0.16915728  | -4.531178853 | 6.90E-06 | 2.34E-05 no |

|           |              |              |          |          |    |
|-----------|--------------|--------------|----------|----------|----|
| PKN2      | 0.16910204   | 4.529655578  | 6.95E-06 | 2.35E-05 | no |
| AQP5      | 0.169080641  | 4.529065488  | 6.97E-06 | 2.36E-05 | no |
| MAP1A     | -0.169076512 | -4.528951655 | 6.97E-06 | 2.36E-05 | no |
| LOC283392 | -0.169055037 | -4.528359482 | 6.99E-06 | 2.37E-05 | no |
| KRT23     | 0.169046853  | 4.528133799  | 7.00E-06 | 2.37E-05 | no |
| CYP1A1    | -0.169033627 | -4.527769126 | 7.01E-06 | 2.37E-05 | no |
| DUSP11    | 0.169013898  | 4.527225111  | 7.03E-06 | 2.38E-05 | no |
| C21orf125 | -0.168927591 | -4.524845365 | 7.10E-06 | 2.40E-05 | no |
| SH3BGR    | 0.168904806  | 4.524217127  | 7.13E-06 | 2.41E-05 | no |
| CCL26     | 0.168894753  | 4.523939922  | 7.13E-06 | 2.41E-05 | no |
| THAP1     | 0.168893969  | 4.52391833   | 7.14E-06 | 2.41E-05 | no |
| ARHGDI3   | -0.168875108 | -4.523398291 | 7.15E-06 | 2.42E-05 | no |
| MME       | 0.168831674  | 4.522200753  | 7.19E-06 | 2.43E-05 | no |
| CTSF      | -0.168815483 | -4.521754332 | 7.21E-06 | 2.44E-05 | no |
| TMED4     | 0.168787431  | 4.520980939  | 7.23E-06 | 2.44E-05 | no |
| SEC24A    | 0.168778755  | 4.520741722  | 7.24E-06 | 2.45E-05 | no |
| RIMS1     | -0.168751033 | -4.519977434 | 7.27E-06 | 2.46E-05 | no |
| NEK11     | 0.168735131  | 4.519539     | 7.28E-06 | 2.46E-05 | no |
| SYN3      | -0.168715276 | -4.518991622 | 7.30E-06 | 2.47E-05 | no |
| KCTD16    | -0.168687481 | -4.518225321 | 7.32E-06 | 2.47E-05 | no |
| C14orf149 | 0.168684295  | 4.518137499  | 7.33E-06 | 2.47E-05 | no |
| PRMT6     | 0.168629535  | 4.516627823  | 7.38E-06 | 2.49E-05 | no |
| WDR55     | 0.168544668  | 4.514288237  | 7.46E-06 | 2.52E-05 | no |
| ARMCX2    | 0.168539054  | 4.514133497  | 7.46E-06 | 2.52E-05 | no |
| ATP1A1    | 0.168528263  | 4.513836026  | 7.47E-06 | 2.52E-05 | no |
| TFAP2C    | 0.168453786  | 4.511782961  | 7.54E-06 | 2.55E-05 | no |
| CALN1     | -0.168441277 | -4.511438157 | 7.56E-06 | 2.55E-05 | no |
| PARN      | 0.168439993  | 4.511402756  | 7.56E-06 | 2.55E-05 | no |
| SCHIP1    | -0.168403532 | -4.51039769  | 7.59E-06 | 2.56E-05 | no |
| H3F3C     | -0.168387647 | -4.509959823 | 7.61E-06 | 2.56E-05 | no |
| KIFC2     | -0.168386109 | -4.509917423 | 7.61E-06 | 2.56E-05 | no |
| PI4KAP1   | -0.16837792  | -4.509691708 | 7.62E-06 | 2.57E-05 | no |
| PNMAL2    | -0.168369966 | -4.509472466 | 7.62E-06 | 2.57E-05 | no |
| KIAA0146  | 0.168346197  | 4.508817289  | 7.65E-06 | 2.58E-05 | no |
| KIAA0415  | 0.168300914  | 4.507569098  | 7.69E-06 | 2.59E-05 | no |
| B4GALT4   | 0.168273652  | 4.506817668  | 7.72E-06 | 2.60E-05 | no |
| DLK2      | -0.168256401 | -4.506342193 | 7.73E-06 | 2.60E-05 | no |
| GRAMD1B   | -0.168247614 | -4.506099992 | 7.74E-06 | 2.61E-05 | no |
| SLC8A2    | -0.168212955 | -4.505144688 | 7.78E-06 | 2.62E-05 | no |
| DNAH5     | 0.168204268  | 4.50490526   | 7.78E-06 | 2.62E-05 | no |
| RBM46     | 0.168150433  | 4.503421487  | 7.84E-06 | 2.64E-05 | no |
| ZNF624    | -0.168107455 | -4.502236957 | 7.88E-06 | 2.65E-05 | no |
| SHROOM3   | 0.16809547   | 4.501906638  | 7.89E-06 | 2.66E-05 | no |
| ZNF76     | -0.168079333 | -4.501461898 | 7.91E-06 | 2.66E-05 | no |
| CELF2     | -0.168077446 | -4.501409884 | 7.91E-06 | 2.66E-05 | no |
| AMH       | -0.168075751 | -4.501363174 | 7.91E-06 | 2.66E-05 | no |
| CD177     | 0.168075199  | 4.50134797   | 7.91E-06 | 2.66E-05 | no |
| CELF4     | -0.168064767 | -4.501060456 | 7.92E-06 | 2.66E-05 | no |
| LOC150622 | -0.168019576 | -4.499815009 | 7.97E-06 | 2.68E-05 | no |
| 11-Mar    | -0.168009252 | -4.499530462 | 7.98E-06 | 2.68E-05 | no |
| ADPRHL2   | 0.167966372  | 4.498348738  | 8.02E-06 | 2.70E-05 | no |

|           |              |              |          |             |
|-----------|--------------|--------------|----------|-------------|
| TMEM22    | 0.167965834  | 4.498333909  | 8.02E-06 | 2.70E-05 no |
| PTPRJ     | 0.167956576  | 4.498078777  | 8.03E-06 | 2.70E-05 no |
| APOM      | -0.167946907 | -4.497812324 | 8.04E-06 | 2.70E-05 no |
| MAPK14    | 0.167906256  | 4.496692043  | 8.08E-06 | 2.71E-05 no |
| FAM3D     | 0.16787983   | 4.495963803  | 8.11E-06 | 2.72E-05 no |
| ADCY10    | 0.167866708  | 4.495602188  | 8.12E-06 | 2.73E-05 no |
| SPRY2     | 0.167852337  | 4.495206175  | 8.14E-06 | 2.73E-05 no |
| C8orf46   | -0.167823393 | -4.494408572 | 8.17E-06 | 2.74E-05 no |
| ANKS3     | -0.167805246 | -4.493908482 | 8.19E-06 | 2.75E-05 no |
| RAB8B     | 0.167779456  | 4.493197813  | 8.21E-06 | 2.75E-05 no |
| JMJD1C    | -0.167773473 | -4.493032959 | 8.22E-06 | 2.76E-05 no |
| C16orf62  | -0.16768721  | -4.490655944 | 8.31E-06 | 2.79E-05 no |
| MGRN1     | -0.167665465 | -4.490056765 | 8.33E-06 | 2.79E-05 no |
| UHRF1BP1L | -0.167662233 | -4.489967702 | 8.33E-06 | 2.79E-05 no |
| BEND4     | -0.167631848 | -4.489130487 | 8.37E-06 | 2.80E-05 no |
| GIGYF1    | -0.167617954 | -4.488747653 | 8.38E-06 | 2.81E-05 no |
| SYAP1     | 0.167591934  | 4.488030702  | 8.41E-06 | 2.82E-05 no |
| LRTM2     | -0.167566031 | -4.487316978 | 8.44E-06 | 2.83E-05 no |
| PLCB4     | -0.167561239 | -4.48718494  | 8.44E-06 | 2.83E-05 no |
| PCCB      | -0.167555932 | -4.487038738 | 8.45E-06 | 2.83E-05 no |
| DEGS2     | -0.167538375 | -4.486554991 | 8.47E-06 | 2.83E-05 no |
| OMD       | 0.167524267  | 4.48616628   | 8.48E-06 | 2.84E-05 no |
| ATXN10    | -0.167415516 | -4.483169989 | 8.60E-06 | 2.88E-05 no |
| ACSS3     | 0.167394171  | 4.482581935  | 8.62E-06 | 2.88E-05 no |
| GUSBL2    | -0.167367159 | -4.481837739 | 8.65E-06 | 2.89E-05 no |
| GRIN2D    | -0.167360958 | -4.481666906 | 8.66E-06 | 2.90E-05 no |
| BTG3      | 0.167307006  | 4.480180536  | 8.71E-06 | 2.92E-05 no |
| FAM178A   | -0.167291222 | -4.479745709 | 8.73E-06 | 2.92E-05 no |
| AVEN      | 0.167289747  | 4.479705071  | 8.73E-06 | 2.92E-05 no |
| SR140     | -0.167282139 | -4.479495479 | 8.74E-06 | 2.92E-05 no |
| GRPR      | 0.167237308  | 4.478260447  | 8.79E-06 | 2.94E-05 no |
| TFCP2     | -0.167236113 | -4.478227507 | 8.79E-06 | 2.94E-05 no |
| PINK1     | -0.167205782 | -4.477391963 | 8.83E-06 | 2.95E-05 no |
| TSTD1     | 0.167192137  | 4.477016078  | 8.84E-06 | 2.95E-05 no |
| RNF217    | 0.167118925  | 4.47499929   | 8.92E-06 | 2.98E-05 no |
| OLAH      | 0.167076139  | 4.47382067   | 8.97E-06 | 3.00E-05 no |
| LOC388428 | -0.167029533 | -4.472536886 | 9.02E-06 | 3.01E-05 no |
| NARS2     | -0.166966638 | -4.470804438 | 9.09E-06 | 3.04E-05 no |
| ZNF610    | -0.166945277 | -4.470216076 | 9.12E-06 | 3.04E-05 no |
| HIST1H2BJ | 0.166935403  | 4.469944101  | 9.13E-06 | 3.05E-05 no |
| PES1      | -0.166923513 | -4.469616598 | 9.14E-06 | 3.05E-05 no |
| HCG18     | -0.166911396 | -4.469282855 | 9.16E-06 | 3.06E-05 no |
| EP400     | -0.166890368 | -4.468703661 | 9.18E-06 | 3.06E-05 no |
| B3GNT9    | 0.166874874  | 4.468276922  | 9.20E-06 | 3.07E-05 no |
| NEK5      | 0.166871265  | 4.4681775    | 9.20E-06 | 3.07E-05 no |
| FSTL5     | -0.166866929 | -4.468058074 | 9.21E-06 | 3.07E-05 no |
| TBC1D10B  | -0.166854264 | -4.467709248 | 9.22E-06 | 3.08E-05 no |
| PEPD      | 0.166813397  | 4.466583654  | 9.27E-06 | 3.09E-05 no |
| ATP13A4   | -0.166800613 | -4.466231559 | 9.29E-06 | 3.09E-05 no |
| DVL3      | -0.166779421 | -4.465647884 | 9.31E-06 | 3.10E-05 no |
| ZBTB43    | -0.166778196 | -4.46561416  | 9.31E-06 | 3.10E-05 no |



|          |              |              |          |             |
|----------|--------------|--------------|----------|-------------|
| QPRT     | 0.166769367  | 4.465370999  | 9.32E-06 | 3.11E-05 no |
| MYCL1    | -0.166767381 | -4.465316289 | 9.32E-06 | 3.11E-05 no |
| CNTD1    | -0.166721348 | -4.464048466 | 9.38E-06 | 3.12E-05 no |
| MYH7     | -0.166699019 | -4.463433522 | 9.40E-06 | 3.13E-05 no |
| SPTBN1   | -0.166698389 | -4.463416163 | 9.40E-06 | 3.13E-05 no |
| GALNT9   | -0.166675689 | -4.462790995 | 9.43E-06 | 3.14E-05 no |
| CTRB1    | 0.16667085   | 4.462657732  | 9.44E-06 | 3.14E-05 no |
| C9orf4   | -0.166668885 | -4.462603617 | 9.44E-06 | 3.14E-05 no |
| CACNB1   | -0.166653059 | -4.46216777  | 9.46E-06 | 3.15E-05 no |
| SLC25A26 | -0.166650309 | -4.462092035 | 9.46E-06 | 3.15E-05 no |
| GPR108   | 0.166596245  | 4.460603119  | 9.53E-06 | 3.17E-05 no |
| GNPDA2   | -0.166571993 | -4.459935251 | 9.55E-06 | 3.18E-05 no |
| PQLC2    | 0.166557474  | 4.459535399  | 9.57E-06 | 3.18E-05 no |
| CASP3    | 0.166539832  | 4.459049578  | 9.59E-06 | 3.19E-05 no |
| SLC25A33 | -0.166539213 | -4.459032524 | 9.59E-06 | 3.19E-05 no |
| NID2     | 0.16653776   | 4.458992513  | 9.60E-06 | 3.19E-05 no |
| CETN2    | 0.166507981  | 4.458172437  | 9.63E-06 | 3.20E-05 no |
| CXorf57  | -0.166495258 | -4.457822092 | 9.65E-06 | 3.20E-05 no |
| HNF4G    | 0.166468023  | 4.45707211   | 9.68E-06 | 3.22E-05 no |
| FGD4     | 0.166450208  | 4.45658153   | 9.70E-06 | 3.22E-05 no |
| ORAI1    | 0.166449718  | 4.456568033  | 9.70E-06 | 3.22E-05 no |
| TMEM167B | 0.166424807  | 4.455882049  | 9.73E-06 | 3.23E-05 no |
| ZNF131   | -0.16641262  | -4.455546455 | 9.75E-06 | 3.24E-05 no |
| C2orf72  | -0.166398082 | -4.455146137 | 9.76E-06 | 3.24E-05 no |
| LRRC37B2 | -0.166376575 | -4.45455391  | 9.79E-06 | 3.25E-05 no |
| ZSCAN5A  | 0.166361432  | 4.454136934  | 9.81E-06 | 3.25E-05 no |
| ACOX2    | 0.166356862  | 4.454011105  | 9.81E-06 | 3.26E-05 no |
| CDH5     | 0.16635136   | 4.453859595  | 9.82E-06 | 3.26E-05 no |
| RANGAP1  | -0.166344926 | -4.453682418 | 9.83E-06 | 3.26E-05 no |
| SDHAP3   | -0.166260862 | -4.451367709 | 9.93E-06 | 3.29E-05 no |
| PRAC     | 0.166244532  | 4.450918079  | 9.95E-06 | 3.30E-05 no |
| C2CD2L   | -0.166226281 | -4.450415547 | 9.98E-06 | 3.31E-05 no |
| SHPRH    | -0.166183838 | -4.44924694  | 1.00E-05 | 3.32E-05 no |
| FGD6     | 0.166176098  | 4.449033832  | 1.00E-05 | 3.33E-05 no |
| SRPRB    | 0.166165909  | 4.448753293  | 1.01E-05 | 3.33E-05 no |
| AGRP     | 0.166164334  | 4.448709935  | 1.01E-05 | 3.33E-05 no |
| COMMD1   | 0.166159454  | 4.448575555  | 1.01E-05 | 3.33E-05 no |
| DET1     | -0.166153488 | -4.448411317 | 1.01E-05 | 3.33E-05 no |
| BBS5     | 0.166122236  | 4.447550861  | 1.01E-05 | 3.35E-05 no |
| CLVS1    | -0.166108264 | -4.44716618  | 1.01E-05 | 3.35E-05 no |
| BTBD9    | -0.166106285 | -4.447111691 | 1.01E-05 | 3.35E-05 no |
| TMEM17   | 0.166095341  | 4.446810374  | 1.01E-05 | 3.36E-05 no |
| ITM2B    | 0.165994487  | 4.444033699  | 1.03E-05 | 3.40E-05 no |
| MORC4    | 0.165981078  | 4.443664551  | 1.03E-05 | 3.40E-05 no |
| C2orf69  | -0.165977664 | -4.44357055  | 1.03E-05 | 3.40E-05 no |
| TPSAB1   | 0.165976983  | 4.443551807  | 1.03E-05 | 3.40E-05 no |
| RNF150   | -0.165967382 | -4.443287494 | 1.03E-05 | 3.41E-05 no |
| PHEX     | 0.165948634  | 4.442771358  | 1.03E-05 | 3.41E-05 no |
| TACSTD2  | 0.165918293  | 4.441936061  | 1.04E-05 | 3.43E-05 no |
| VAR5     | -0.165883812 | -4.440986836 | 1.04E-05 | 3.44E-05 no |
| MAZ      | -0.165877855 | -4.440822847 | 1.04E-05 | 3.44E-05 no |

|              |              |              |          |          |    |
|--------------|--------------|--------------|----------|----------|----|
| SEMA5B       | -0.165859281 | -4.440311505 | 1.04E-05 | 3.45E-05 | no |
| FFAR3        | 0.165859185  | 4.440308861  | 1.04E-05 | 3.45E-05 | no |
| FBX08        | 0.165846699  | 4.439965132  | 1.05E-05 | 3.45E-05 | no |
| COL5A1       | 0.165830611  | 4.439522276  | 1.05E-05 | 3.46E-05 | no |
| DHRXSX       | 0.165829565  | 4.43949347   | 1.05E-05 | 3.46E-05 | no |
| 8-Mar        | -0.165825543 | -4.439382741 | 1.05E-05 | 3.46E-05 | no |
| GRK4         | -0.165779269 | -4.438108916 | 1.05E-05 | 3.48E-05 | no |
| FAM163B      | -0.165764205 | -4.437694244 | 1.06E-05 | 3.49E-05 | no |
| C21orf2      | -0.165758552 | -4.437538621 | 1.06E-05 | 3.49E-05 | no |
| C10orf57     | -0.165728265 | -4.436704918 | 1.06E-05 | 3.50E-05 | no |
| SNORD116-4   | -0.165691127 | -4.435682616 | 1.07E-05 | 3.52E-05 | no |
| EFCAB10      | 0.165634655  | 4.434128179  | 1.07E-05 | 3.54E-05 | no |
| DCC          | -0.1656296   | -4.433989037 | 1.07E-05 | 3.54E-05 | no |
| BACH2        | -0.165625086 | -4.433864789 | 1.08E-05 | 3.54E-05 | no |
| PRTG         | -0.165586961 | -4.432815373 | 1.08E-05 | 3.56E-05 | no |
| MECOM        | 0.165561452  | 4.432113249  | 1.08E-05 | 3.57E-05 | no |
| PDGFD        | 0.165554716  | 4.431927839  | 1.08E-05 | 3.57E-05 | no |
| APIP         | 0.165505347  | 4.430569001  | 1.09E-05 | 3.59E-05 | no |
| USP18        | 0.16550248   | 4.430490095  | 1.09E-05 | 3.60E-05 | no |
| ZC3H4        | -0.165446978 | -4.428962476 | 1.10E-05 | 3.62E-05 | no |
| DUS3L        | -0.165431909 | -4.428547734 | 1.10E-05 | 3.63E-05 | no |
| ERO1L        | 0.165425411  | 4.428368891  | 1.10E-05 | 3.63E-05 | no |
| MESDC2       | 0.165389293  | 4.427374832  | 1.11E-05 | 3.64E-05 | no |
| C12orf43     | -0.165389061 | -4.427368443 | 1.11E-05 | 3.64E-05 | no |
| CNTNAP5      | -0.165379041 | -4.427092668 | 1.11E-05 | 3.65E-05 | no |
| ULK1         | -0.165347287 | -4.426218735 | 1.11E-05 | 3.66E-05 | no |
| ZNF462       | -0.165229485 | -4.422976732 | 1.13E-05 | 3.71E-05 | no |
| MSL2         | -0.165224511 | -4.422839844 | 1.13E-05 | 3.72E-05 | no |
| ZNF236       | -0.165209676 | -4.422431606 | 1.13E-05 | 3.72E-05 | no |
| TMEM41A      | 0.165189934  | 4.421888295  | 1.13E-05 | 3.73E-05 | no |
| SIX5         | 0.165174     | 4.421449817  | 1.14E-05 | 3.74E-05 | no |
| TMEM108      | -0.165171023 | -4.421367893 | 1.14E-05 | 3.74E-05 | no |
| DCLRE1C      | 0.165168128  | 4.421288207  | 1.14E-05 | 3.74E-05 | no |
| SP1          | 0.165165671  | 4.421220599  | 1.14E-05 | 3.74E-05 | no |
| C6orf153     | 0.165147789  | 4.420728497  | 1.14E-05 | 3.75E-05 | no |
| BBS9         | 0.165144751  | 4.420644915  | 1.14E-05 | 3.75E-05 | no |
| RNF114       | 0.165135309  | 4.420385075  | 1.14E-05 | 3.75E-05 | no |
| ZFYVE9       | -0.165119293 | -4.419944336 | 1.14E-05 | 3.76E-05 | no |
| PPP3CB       | -0.165107769 | -4.419627211 | 1.15E-05 | 3.76E-05 | no |
| PTHLH        | 0.165107559  | 4.419621447  | 1.15E-05 | 3.76E-05 | no |
| POM121L10P   | -0.165105902 | -4.419575834 | 1.15E-05 | 3.76E-05 | no |
| C7orf41      | -0.165104078 | -4.419525647 | 1.15E-05 | 3.76E-05 | no |
| SPCS2        | -0.16510249  | -4.41948194  | 1.15E-05 | 3.76E-05 | no |
| FLYWCH2      | -0.165065667 | -4.418468644 | 1.15E-05 | 3.78E-05 | no |
| THUMPDI      | -0.165062023 | -4.418368375 | 1.15E-05 | 3.78E-05 | no |
| PTPN14       | 0.165050697  | 4.418056706  | 1.15E-05 | 3.79E-05 | no |
| LOC100302640 | -0.165049502 | -4.418023829 | 1.15E-05 | 3.79E-05 | no |
| ITGB3BP      | 0.165031622  | 4.417531829  | 1.16E-05 | 3.79E-05 | no |
| PKIB         | 0.165018971  | 4.417183699  | 1.16E-05 | 3.80E-05 | no |
| RSAD1        | -0.165006747 | -4.416847332 | 1.16E-05 | 3.80E-05 | no |
| SMPDI        | 0.164982366  | 4.416176455  | 1.16E-05 | 3.82E-05 | no |

|           |              |              |          |          |    |
|-----------|--------------|--------------|----------|----------|----|
| GUCY2C    | 0.164974333  | 4.415955413  | 1.17E-05 | 3.82E-05 | no |
| KCNT2     | -0.164903043 | -4.413993802 | 1.18E-05 | 3.85E-05 | no |
| CCT3      | -0.16478448  | -4.410731596 | 1.19E-05 | 3.91E-05 | no |
| C2orf50   | 0.164783555  | 4.410706145  | 1.19E-05 | 3.91E-05 | no |
| CCDC73    | -0.164766997 | -4.410250569 | 1.20E-05 | 3.91E-05 | no |
| LOC285954 | -0.164761215 | -4.410091476 | 1.20E-05 | 3.92E-05 | no |
| CSDE1     | 0.164756757  | 4.409968818  | 1.20E-05 | 3.92E-05 | no |
| OMP       | 0.164746605  | 4.409689507  | 1.20E-05 | 3.92E-05 | no |
| C8ORFK29  | -0.164742796 | -4.409584716 | 1.20E-05 | 3.92E-05 | no |
| WASH7P    | -0.164717773 | -4.408896251 | 1.20E-05 | 3.94E-05 | no |
| PPIL5     | 0.164692289  | 4.408195125  | 1.21E-05 | 3.95E-05 | no |
| ZNF408    | -0.164660418 | -4.407318287 | 1.21E-05 | 3.96E-05 | no |
| C6orf58   | -0.16460884  | -4.405899282 | 1.22E-05 | 3.99E-05 | no |
| RASEF     | 0.164585351  | 4.405253057  | 1.22E-05 | 4.00E-05 | no |
| CLU       | 0.164581117  | 4.405136576  | 1.22E-05 | 4.00E-05 | no |
| ARSE      | 0.164574623  | 4.404957936  | 1.22E-05 | 4.00E-05 | no |
| SETD4     | -0.164544354 | -4.404125216 | 1.23E-05 | 4.02E-05 | no |
| FAM164C   | 0.164480554  | 4.402370071  | 1.24E-05 | 4.05E-05 | no |
| OGN       | 0.164473772  | 4.402183508  | 1.24E-05 | 4.05E-05 | no |
| AP4S1     | -0.16447355  | -4.402177407 | 1.24E-05 | 4.05E-05 | no |
| MRPL13    | 0.164458419  | 4.401761158  | 1.24E-05 | 4.06E-05 | no |
| IMPACT    | 0.16442141   | 4.40074308   | 1.25E-05 | 4.07E-05 | no |
| LOC286238 | 0.164418079  | 4.400651458  | 1.25E-05 | 4.08E-05 | no |
| C8orf84   | 0.164391552  | 4.39992172   | 1.25E-05 | 4.09E-05 | no |
| ARHGEF35  | 0.164389269  | 4.399858933  | 1.25E-05 | 4.09E-05 | no |
| FAM131B   | -0.164375797 | -4.399488344 | 1.25E-05 | 4.09E-05 | no |
| NPAS2     | 0.164373514  | 4.399425548  | 1.26E-05 | 4.10E-05 | no |
| CHD2      | -0.164371031 | -4.399357224 | 1.26E-05 | 4.10E-05 | no |
| UROS      | -0.164357553 | -4.398986477 | 1.26E-05 | 4.10E-05 | no |
| S100BPB   | 0.164307943  | 4.397621828  | 1.27E-05 | 4.13E-05 | no |
| B9D2      | 0.164296398  | 4.397304259  | 1.27E-05 | 4.13E-05 | no |
| SLC25A22  | -0.164286307 | -4.397026708 | 1.27E-05 | 4.14E-05 | no |
| LCMT1     | -0.164265417 | -4.396452083 | 1.27E-05 | 4.15E-05 | no |
| ACTR3B    | -0.164258322 | -4.396256923 | 1.27E-05 | 4.15E-05 | no |
| WASH3P    | -0.16422909  | -4.395452855 | 1.28E-05 | 4.16E-05 | no |
| ZNF100    | -0.164208472 | -4.394885732 | 1.28E-05 | 4.17E-05 | no |
| GLDN      | 0.164190781  | 4.394399152  | 1.28E-05 | 4.18E-05 | no |
| IQCH      | 0.164183059  | 4.394186737  | 1.29E-05 | 4.19E-05 | no |
| PARG      | -0.164167593 | -4.393761343 | 1.29E-05 | 4.19E-05 | no |
| TPPP2     | -0.164154191 | -4.39339273  | 1.29E-05 | 4.20E-05 | no |
| ZNF263    | -0.164147307 | -4.393203374 | 1.29E-05 | 4.20E-05 | no |
| EIF2AK3   | 0.164072298  | 4.391140298  | 1.30E-05 | 4.24E-05 | no |
| ZNF765    | 0.164033941  | 4.390085361  | 1.31E-05 | 4.26E-05 | no |
| ELF3      | 0.164018868  | 4.389670802  | 1.31E-05 | 4.27E-05 | no |
| CYB5RL    | 0.164009407  | 4.389410586  | 1.31E-05 | 4.27E-05 | no |
| CYP4F11   | 0.16398945   | 4.388861708  | 1.32E-05 | 4.28E-05 | no |
| LRRC39    | 0.163969254  | 4.388306271  | 1.32E-05 | 4.29E-05 | no |
| RORC      | 0.163963643  | 4.388151964  | 1.32E-05 | 4.29E-05 | no |
| CLUL1     | 0.163915899  | 4.3868389    | 1.33E-05 | 4.32E-05 | no |
| SLC15A2   | -0.163915162 | -4.386818643 | 1.33E-05 | 4.32E-05 | no |
| MSI1      | -0.16386014  | -4.385305466 | 1.34E-05 | 4.35E-05 | no |

|              |              |              |          |          |    |
|--------------|--------------|--------------|----------|----------|----|
| THAP9        | -0.163847803 | -4.384966189 | 1.34E-05 | 4.35E-05 | no |
| FAM115A      | -0.163843287 | -4.384841977 | 1.34E-05 | 4.35E-05 | no |
| TCF7L1       | -0.163827585 | -4.38441018  | 1.34E-05 | 4.36E-05 | no |
| LRRC69       | 0.163780518  | 4.383115828  | 1.35E-05 | 4.39E-05 | no |
| TTYH2        | -0.163702766 | -4.380977717 | 1.36E-05 | 4.43E-05 | no |
| C4A          | 0.163701875  | 4.380953205  | 1.36E-05 | 4.43E-05 | no |
| WDR89        | -0.163665233 | -4.379945603 | 1.37E-05 | 4.45E-05 | no |
| STRC         | -0.163641434 | -4.379291186 | 1.37E-05 | 4.46E-05 | no |
| SIPA1L2      | 0.163566848  | 4.377240269  | 1.39E-05 | 4.50E-05 | no |
| RBM5         | -0.163472339 | -4.374641624 | 1.40E-05 | 4.55E-05 | no |
| MAPK11       | -0.163472208 | -4.374638035 | 1.40E-05 | 4.55E-05 | no |
| GATSL3       | -0.16346854  | -4.374537165 | 1.40E-05 | 4.55E-05 | no |
| SEN7         | -0.163457988 | -4.374247047 | 1.40E-05 | 4.56E-05 | no |
| MAT2B        | 0.163457896  | 4.37424451   | 1.40E-05 | 4.56E-05 | no |
| RABL3        | 0.163449194  | 4.374005252  | 1.41E-05 | 4.56E-05 | no |
| LOC100190939 | -0.163428944 | -4.373448465 | 1.41E-05 | 4.57E-05 | no |
| FAM98B       | -0.163424722 | -4.373332383 | 1.41E-05 | 4.57E-05 | no |
| MYCN         | -0.163392178 | -4.372437615 | 1.42E-05 | 4.59E-05 | no |
| SOX1         | -0.16339155  | -4.372420327 | 1.42E-05 | 4.59E-05 | no |
| ATP8B2       | 0.163348326  | 4.371231944  | 1.42E-05 | 4.61E-05 | no |
| NUDT16       | 0.163341308  | 4.37103899   | 1.43E-05 | 4.62E-05 | no |
| SLC16A11     | 0.163337435  | 4.370932496  | 1.43E-05 | 4.62E-05 | no |
| CDC14B       | -0.163332223 | -4.370789208 | 1.43E-05 | 4.62E-05 | no |
| PPP2R3B      | -0.163314025 | -4.370288876 | 1.43E-05 | 4.63E-05 | no |
| UBAC1        | -0.163291506 | -4.369669757 | 1.43E-05 | 4.64E-05 | no |
| SLFN13       | 0.163270482  | 4.369091758  | 1.44E-05 | 4.65E-05 | no |
| FAM182B      | -0.163251817 | -4.368578588 | 1.44E-05 | 4.66E-05 | no |
| GPX7         | 0.163250652  | 4.368546558  | 1.44E-05 | 4.66E-05 | no |
| PRR22        | -0.163250343 | -4.368538071 | 1.44E-05 | 4.66E-05 | no |
| PCDH10       | -0.163241009 | -4.36828146  | 1.44E-05 | 4.67E-05 | no |
| KLHL38       | 0.163195213  | 4.36702243   | 1.45E-05 | 4.69E-05 | no |
| HNRNPU       | -0.163180453 | -4.366616659 | 1.45E-05 | 4.70E-05 | no |
| KIAA0196     | 0.163178444  | 4.366561429  | 1.45E-05 | 4.70E-05 | no |
| MAP3K10      | -0.163158627 | -4.366016639 | 1.46E-05 | 4.71E-05 | no |
| BAZ2B        | -0.163132341 | -4.365294009 | 1.46E-05 | 4.72E-05 | no |
| HS3ST3A1     | 0.163128113  | 4.365177791  | 1.46E-05 | 4.73E-05 | no |
| ELL3         | 0.163124973  | 4.365091456  | 1.46E-05 | 4.73E-05 | no |
| IDE          | 0.163102816  | 4.364482348  | 1.47E-05 | 4.74E-05 | no |
| LUZP6        | 0.163061649  | 4.363350661  | 1.47E-05 | 4.76E-05 | no |
| PRDM10       | -0.163000388 | -4.361666624 | 1.49E-05 | 4.80E-05 | no |
| HAPLN1       | -0.16298929  | -4.36136157  | 1.49E-05 | 4.80E-05 | no |
| MMEL1        | 0.162969266  | 4.360811134  | 1.49E-05 | 4.81E-05 | no |
| C11orf20     | -0.16286641  | -4.357983838 | 1.51E-05 | 4.87E-05 | no |
| VPS13D       | -0.162854425 | -4.357654413 | 1.51E-05 | 4.88E-05 | no |
| ARF1         | 0.162841912  | 4.357310475  | 1.51E-05 | 4.89E-05 | no |
| IRF3         | 0.162841641  | 4.35730301   | 1.51E-05 | 4.89E-05 | no |
| PAR1         | -0.162819664 | -4.356698941 | 1.52E-05 | 4.90E-05 | no |
| PTGES2       | -0.162814118 | -4.356546501 | 1.52E-05 | 4.90E-05 | no |
| PITPNB       | -0.162797602 | -4.356092532 | 1.52E-05 | 4.91E-05 | no |
| QSER1        | -0.162787783 | -4.355822646 | 1.52E-05 | 4.92E-05 | no |
| HSBP1L1      | 0.162706614  | 4.353591694  | 1.54E-05 | 4.96E-05 | no |

|           |              |              |          |          |    |
|-----------|--------------|--------------|----------|----------|----|
| TRIM39    | -0.16269565  | -4.353290337 | 1.54E-05 | 4.97E-05 | no |
| MYH3      | -0.162675775 | -4.352744066 | 1.55E-05 | 4.98E-05 | no |
| TBC1D13   | -0.162671512 | -4.352626905 | 1.55E-05 | 4.98E-05 | no |
| GNA11     | -0.162650397 | -4.352046588 | 1.55E-05 | 5.00E-05 | no |
| GJC1      | 0.16263565   | 4.351641285  | 1.55E-05 | 5.00E-05 | no |
| YTHDF3    | 0.16260471   | 4.350790922  | 1.56E-05 | 5.02E-05 | no |
| NUP205    | 0.162562159  | 4.349621492  | 1.57E-05 | 5.05E-05 | no |
| SNAPC2    | 0.162550515  | 4.349301486  | 1.57E-05 | 5.05E-05 | no |
| FBX041    | -0.162504203 | -4.348028701 | 1.58E-05 | 5.08E-05 | no |
| FAM106C   | -0.162473511 | -4.347185228 | 1.58E-05 | 5.10E-05 | no |
| EPB41L5   | -0.162430485 | -4.346002822 | 1.59E-05 | 5.13E-05 | no |
| POLR3A    | -0.162420357 | -4.345724495 | 1.59E-05 | 5.13E-05 | no |
| E2F7      | 0.162401764  | 4.345213552  | 1.60E-05 | 5.14E-05 | no |
| SYCP2L    | -0.162387786 | -4.344829424 | 1.60E-05 | 5.15E-05 | no |
| TJP1      | -0.162308096 | -4.342639525 | 1.62E-05 | 5.20E-05 | no |
| TSSK4     | -0.162284856 | -4.342000918 | 1.62E-05 | 5.21E-05 | no |
| SRPX      | 0.162269207  | 4.341570904  | 1.62E-05 | 5.22E-05 | no |
| GHITM     | -0.162261481 | -4.341358582 | 1.63E-05 | 5.23E-05 | no |
| ZNF157    | -0.162219221 | -4.34019735  | 1.63E-05 | 5.25E-05 | no |
| C20orf117 | -0.162142644 | -4.338093181 | 1.65E-05 | 5.30E-05 | no |
| GPR21     | -0.162141465 | -4.338060785 | 1.65E-05 | 5.30E-05 | no |
| SASH1     | -0.162099038 | -4.336895027 | 1.66E-05 | 5.33E-05 | no |
| NME5      | 0.162072637  | 4.336169619  | 1.66E-05 | 5.34E-05 | no |
| CELSR2    | -0.162071001 | -4.336124672 | 1.66E-05 | 5.34E-05 | no |
| LOC653786 | 0.162040888  | 4.335297298  | 1.67E-05 | 5.36E-05 | no |
| RABEP1    | -0.16203222  | -4.335059147 | 1.67E-05 | 5.37E-05 | no |
| GADD45A   | 0.16201997   | 4.334722555  | 1.67E-05 | 5.37E-05 | no |
| IGBP1     | -0.162019542 | -4.334710794 | 1.67E-05 | 5.37E-05 | no |
| PAQR3     | 0.161993832  | 4.334004408  | 1.68E-05 | 5.39E-05 | no |
| GCK       | 0.161993226  | 4.333987759  | 1.68E-05 | 5.39E-05 | no |
| BAG1      | -0.161982592 | -4.333695578 | 1.68E-05 | 5.40E-05 | no |
| LOC284837 | 0.16193724   | 4.332449566  | 1.69E-05 | 5.42E-05 | no |
| SMAD5OS   | 0.161856299  | 4.330225808  | 1.71E-05 | 5.48E-05 | no |
| RUNDC3B   | -0.161853005 | -4.330135314 | 1.71E-05 | 5.48E-05 | no |
| TSGA10IP  | 0.16183267   | 4.329576628  | 1.71E-05 | 5.49E-05 | no |
| CCDC40    | 0.161813341  | 4.329045616  | 1.72E-05 | 5.50E-05 | no |
| FST       | 0.161799797  | 4.328673535  | 1.72E-05 | 5.51E-05 | no |
| C6orf186  | 0.161792027  | 4.328460074  | 1.72E-05 | 5.52E-05 | no |
| SPSB1     | 0.161768535  | 4.327814706  | 1.73E-05 | 5.53E-05 | no |
| GPR180    | 0.161749659  | 4.327296128  | 1.73E-05 | 5.54E-05 | no |
| PXDN      | 0.161730789  | 4.326777743  | 1.73E-05 | 5.55E-05 | no |
| PSMA2     | 0.161660624  | 4.324850245  | 1.75E-05 | 5.60E-05 | no |
| TSKU      | 0.161641998  | 4.324338562  | 1.75E-05 | 5.61E-05 | no |
| PRRT2     | -0.161631122 | -4.324039818 | 1.76E-05 | 5.62E-05 | no |
| PCDHB9    | -0.161626452 | -4.323911531 | 1.76E-05 | 5.62E-05 | no |
| SHANK1    | -0.161623981 | -4.323843636 | 1.76E-05 | 5.62E-05 | no |
| ARHGAP6   | 0.16162062   | 4.323751317  | 1.76E-05 | 5.62E-05 | no |
| POU2F3    | 0.16161994   | 4.323732639  | 1.76E-05 | 5.62E-05 | no |
| YWHAE     | -0.161581275 | -4.322670521 | 1.77E-05 | 5.65E-05 | no |
| UTF1      | 0.161576759  | 4.322546456  | 1.77E-05 | 5.65E-05 | no |
| VN1R1     | -0.161565409 | -4.32223468  | 1.77E-05 | 5.66E-05 | no |

|            |              |              |          |          |    |
|------------|--------------|--------------|----------|----------|----|
| TMEM147    | 0.161561929  | 4.322139087  | 1.77E-05 | 5.66E-05 | no |
| MED13      | -0.161516464 | -4.32089023  | 1.78E-05 | 5.69E-05 | no |
| RAB7A      | 0.161442491  | 4.318858328  | 1.80E-05 | 5.74E-05 | no |
| TERF1      | -0.161441112 | -4.318820436 | 1.80E-05 | 5.74E-05 | no |
| LUZP1      | 0.161386147  | 4.3173107    | 1.81E-05 | 5.78E-05 | no |
| CNKSR2     | -0.161354735 | -4.316447932 | 1.82E-05 | 5.80E-05 | no |
| RG9MTD3    | -0.161347943 | -4.316261388 | 1.82E-05 | 5.80E-05 | no |
| DCLRE1B    | 0.161299479  | 4.314930264  | 1.83E-05 | 5.84E-05 | no |
| C1orf220   | -0.16127983  | -4.3143906   | 1.83E-05 | 5.85E-05 | no |
| LGALS9C    | 0.161275285  | 4.314265774  | 1.83E-05 | 5.85E-05 | no |
| COL21A1    | 0.161251454  | 4.313611248  | 1.84E-05 | 5.87E-05 | no |
| IL22RA1    | 0.161244745  | 4.313426988  | 1.84E-05 | 5.87E-05 | no |
| UST        | -0.161239049 | -4.31327054  | 1.84E-05 | 5.87E-05 | no |
| TMPRSS5    | -0.16121579  | -4.312631751 | 1.85E-05 | 5.89E-05 | no |
| TAGLN3     | -0.161195956 | -4.312087017 | 1.85E-05 | 5.90E-05 | no |
| HMGXB3     | 0.161189702  | 4.311915262  | 1.85E-05 | 5.91E-05 | no |
| SEMA6C     | -0.161169846 | -4.311369923 | 1.86E-05 | 5.92E-05 | no |
| SPA17      | 0.161169002  | 4.311346759  | 1.86E-05 | 5.92E-05 | no |
| C1orf59    | 0.161110913  | 4.309751413  | 1.87E-05 | 5.96E-05 | no |
| MASP1      | -0.161105934 | -4.309614689 | 1.87E-05 | 5.96E-05 | no |
| MBLAC2     | -0.1610703   | -4.308636087 | 1.88E-05 | 5.99E-05 | no |
| ZSCAN5B    | -0.161058994 | -4.308325578 | 1.88E-05 | 6.00E-05 | no |
| PPFIA2     | -0.161041977 | -4.307858256 | 1.89E-05 | 6.01E-05 | no |
| GOLT1B     | 0.161035918  | 4.307691874  | 1.89E-05 | 6.01E-05 | no |
| PCDH20     | -0.160988054 | -4.306377454 | 1.90E-05 | 6.04E-05 | no |
| SECISBP2L  | -0.160977587 | -4.306090004 | 1.90E-05 | 6.05E-05 | no |
| NCRNA00119 | 0.16096369   | 4.30570837   | 1.90E-05 | 6.06E-05 | no |
| ZFR2       | -0.160945581 | -4.305211083 | 1.91E-05 | 6.07E-05 | no |
| CDK13      | 0.160940344  | 4.305067285  | 1.91E-05 | 6.07E-05 | no |
| SPIC       | 0.160911942  | 4.304287333  | 1.92E-05 | 6.09E-05 | no |
| SLC22A6    | -0.160907419 | -4.304163141 | 1.92E-05 | 6.10E-05 | no |
| PYGB       | -0.160890749 | -4.303705377 | 1.92E-05 | 6.11E-05 | no |
| KDM2B      | -0.160869624 | -4.30312529  | 1.92E-05 | 6.12E-05 | no |
| APOL4      | 0.160850929  | 4.302611926  | 1.93E-05 | 6.14E-05 | no |
| MIMT1      | -0.160840833 | -4.302334694 | 1.93E-05 | 6.14E-05 | no |
| BAT4       | -0.160810497 | -4.301501704 | 1.94E-05 | 6.16E-05 | no |
| FAM155B    | -0.160797342 | -4.301140473 | 1.94E-05 | 6.17E-05 | no |
| ZNF467     | 0.16077192   | 4.300442428  | 1.95E-05 | 6.19E-05 | no |
| HBEGF      | 0.160771321  | 4.300425981  | 1.95E-05 | 6.19E-05 | no |
| KDR        | 0.160746683  | 4.299749461  | 1.95E-05 | 6.21E-05 | no |
| LDB1       | -0.160736873 | -4.299480102 | 1.96E-05 | 6.21E-05 | no |
| RAB35      | 0.160693512  | 4.298289508  | 1.97E-05 | 6.25E-05 | no |
| CLSTN1     | -0.160673158 | -4.297730642 | 1.97E-05 | 6.26E-05 | no |
| INSIG2     | 0.160670781  | 4.297665374  | 1.97E-05 | 6.26E-05 | no |
| GOLGA8B    | -0.160670064 | -4.297645695 | 1.97E-05 | 6.26E-05 | no |
| CABIN1     | -0.160643776 | -4.296923889 | 1.98E-05 | 6.28E-05 | no |
| CLIP2      | -0.160635764 | -4.296703925 | 1.98E-05 | 6.28E-05 | no |
| STOX2      | -0.160631834 | -4.296596002 | 1.98E-05 | 6.29E-05 | no |
| PSMA7      | 0.160630098  | 4.296548352  | 1.98E-05 | 6.29E-05 | no |
| ZNF383     | 0.160625248  | 4.296415168  | 1.98E-05 | 6.29E-05 | no |
| SLC16A10   | 0.160594602  | 4.295573755  | 1.99E-05 | 6.31E-05 | no |

|           |              |              |          |          |    |
|-----------|--------------|--------------|----------|----------|----|
| ACSM3     | 0.160582347  | 4.295237293  | 1.99E-05 | 6.32E-05 | no |
| FAM149B1  | -0.160569444 | -4.294883034 | 2.00E-05 | 6.33E-05 | no |
| C9orf46   | 0.16055465   | 4.294476854  | 2.00E-05 | 6.34E-05 | no |
| SHFM1     | 0.160540182  | 4.294079614  | 2.00E-05 | 6.35E-05 | no |
| BCAS3     | -0.160504241 | -4.293092844 | 2.01E-05 | 6.38E-05 | no |
| LTF       | 0.160497919  | 4.292919301  | 2.01E-05 | 6.38E-05 | no |
| GPT       | -0.160496546 | -4.292881593 | 2.01E-05 | 6.38E-05 | no |
| TTLL13    | -0.16046171  | -4.291925186 | 2.02E-05 | 6.41E-05 | no |
| IFI6      | 0.160460344  | 4.29188769   | 2.02E-05 | 6.41E-05 | no |
| SOX15     | -0.160450519 | -4.29161794  | 2.02E-05 | 6.41E-05 | no |
| PIP5KL1   | -0.160421999 | -4.290834964 | 2.03E-05 | 6.43E-05 | no |
| PPP1R2P3  | 0.160391786  | 4.290005498  | 2.04E-05 | 6.46E-05 | no |
| NCOR2     | -0.160356091 | -4.289025576 | 2.05E-05 | 6.48E-05 | no |
| CPA5      | 0.160332876  | 4.288388263  | 2.05E-05 | 6.50E-05 | no |
| MLF2      | -0.160326828 | -4.288222221 | 2.06E-05 | 6.50E-05 | no |
| SRPK3     | -0.160312783 | -4.287836651 | 2.06E-05 | 6.51E-05 | no |
| ANKRD12   | -0.160306939 | -4.287676227 | 2.06E-05 | 6.52E-05 | no |
| EGLN2     | 0.160305861  | 4.287646625  | 2.06E-05 | 6.52E-05 | no |
| C22orf29  | -0.160293539 | -4.287308376 | 2.06E-05 | 6.53E-05 | no |
| KCTD6     | -0.160283401 | -4.28703007  | 2.07E-05 | 6.53E-05 | no |
| TCF19     | 0.160282434  | 4.28700351   | 2.07E-05 | 6.53E-05 | no |
| PDS5A     | 0.160255973  | 4.286277112  | 2.07E-05 | 6.55E-05 | no |
| RICH2     | -0.160231527 | -4.285606048 | 2.08E-05 | 6.57E-05 | no |
| NOL7      | -0.160211742 | -4.285062921 | 2.08E-05 | 6.59E-05 | no |
| CSNK2A1   | -0.160175448 | -4.284066645 | 2.09E-05 | 6.61E-05 | no |
| COL27A1   | 0.160175321  | 4.284063144  | 2.09E-05 | 6.61E-05 | no |
| CORIN     | 0.160170013  | 4.283917453  | 2.09E-05 | 6.62E-05 | no |
| PRKG2     | -0.160167164 | -4.283839236 | 2.10E-05 | 6.62E-05 | no |
| C11orf71  | -0.160158555 | -4.283602935 | 2.10E-05 | 6.62E-05 | no |
| BTBD18    | -0.160147321 | -4.283294546 | 2.10E-05 | 6.63E-05 | no |
| CPEB2     | 0.160095096  | 4.281860992  | 2.11E-05 | 6.67E-05 | no |
| SPTA1     | 0.160092841  | 4.281799088  | 2.11E-05 | 6.67E-05 | no |
| MAK       | 0.16007952   | 4.281433451  | 2.12E-05 | 6.68E-05 | no |
| TJP2      | -0.160074517 | -4.281296104 | 2.12E-05 | 6.68E-05 | no |
| FLVCR2    | 0.160029703  | 4.280066022  | 2.13E-05 | 6.72E-05 | no |
| MRPL43    | -0.160004762 | -4.279381433 | 2.14E-05 | 6.74E-05 | no |
| SYCE1     | -0.15999646  | -4.279153558 | 2.14E-05 | 6.74E-05 | no |
| YTHDF2    | 0.15996166   | 4.278198396  | 2.15E-05 | 6.77E-05 | no |
| MPP3      | -0.159937893 | -4.277546051 | 2.15E-05 | 6.79E-05 | no |
| HNRNPA3P1 | -0.159933937 | -4.277437464 | 2.15E-05 | 6.79E-05 | no |
| CYB5A     | 0.159925649  | 4.277209985  | 2.16E-05 | 6.80E-05 | no |
| PROM2     | -0.159925097 | -4.277194847 | 2.16E-05 | 6.80E-05 | no |
| PTBP1     | 0.159891071  | 4.276260928  | 2.17E-05 | 6.82E-05 | no |
| H1FO      | -0.15987954  | -4.275944441 | 2.17E-05 | 6.83E-05 | no |
| KIAA0090  | 0.159863196  | 4.275495872  | 2.17E-05 | 6.84E-05 | no |
| CLTCL1    | -0.159807896 | -4.273978113 | 2.19E-05 | 6.89E-05 | no |
| ITIH5L    | 0.159799814  | 4.273756312  | 2.19E-05 | 6.89E-05 | no |
| IQUB      | 0.159789488  | 4.273472904  | 2.19E-05 | 6.90E-05 | no |
| FAM53A    | 0.159785984  | 4.27337673   | 2.19E-05 | 6.90E-05 | no |
| GPR61     | -0.159748382 | -4.27234477  | 2.20E-05 | 6.93E-05 | no |
| TOP3B     | -0.159682983 | -4.270549925 | 2.22E-05 | 6.99E-05 | no |

|            |              |              |          |          |    |
|------------|--------------|--------------|----------|----------|----|
| GNE        | -0.159677036 | -4.270386736 | 2.22E-05 | 6.99E-05 | no |
| PCDHB1     | 0.159663645  | 4.270019239  | 2.23E-05 | 7.00E-05 | no |
| SETBP1     | -0.15960033  | -4.268281692 | 2.24E-05 | 7.05E-05 | no |
| SHISA4     | -0.159586179 | -4.267893345 | 2.25E-05 | 7.06E-05 | no |
| FAM181A    | 0.159585683  | 4.267879737  | 2.25E-05 | 7.06E-05 | no |
| SLC1A2     | -0.159580487 | -4.267737138 | 2.25E-05 | 7.07E-05 | no |
| GPR56      | -0.159568422 | -4.26740606  | 2.25E-05 | 7.08E-05 | no |
| SAP130     | -0.15956725  | -4.267373885 | 2.25E-05 | 7.08E-05 | no |
| ADCY8      | -0.159545515 | -4.266777437 | 2.26E-05 | 7.09E-05 | no |
| LIFR       | -0.159523953 | -4.266185731 | 2.26E-05 | 7.11E-05 | no |
| SH3BGRL2   | -0.159521446 | -4.266116949 | 2.26E-05 | 7.11E-05 | no |
| ZC3HAV1L   | 0.159521127  | 4.266108175  | 2.26E-05 | 7.11E-05 | no |
| CLEC4F     | -0.159452716 | -4.264230906 | 2.28E-05 | 7.17E-05 | no |
| RFT1       | 0.159444886  | 4.264016053  | 2.28E-05 | 7.17E-05 | no |
| PRDX6      | 0.159363493  | 4.261782638  | 2.31E-05 | 7.24E-05 | no |
| SDHC       | 0.159362171  | 4.261746361  | 2.31E-05 | 7.24E-05 | no |
| TMEM175    | -0.159336656 | -4.261046243 | 2.31E-05 | 7.26E-05 | no |
| RPS25      | -0.159327387 | -4.260791915 | 2.32E-05 | 7.27E-05 | no |
| USP13      | -0.159322739 | -4.260664389 | 2.32E-05 | 7.27E-05 | no |
| C9orf30    | 0.159278708  | 4.259456238  | 2.33E-05 | 7.31E-05 | no |
| CRISPLD2   | 0.159266258  | 4.259114616  | 2.33E-05 | 7.32E-05 | no |
| PLSCR2     | 0.159262066  | 4.258999605  | 2.34E-05 | 7.32E-05 | no |
| BAHD1      | -0.159259769 | -4.258936584 | 2.34E-05 | 7.32E-05 | no |
| PRCP       | 0.159232801  | 4.258196633  | 2.34E-05 | 7.35E-05 | no |
| ARL10      | -0.15921637  | -4.257745807 | 2.35E-05 | 7.36E-05 | no |
| MRPL17     | 0.159191611  | 4.257066498  | 2.36E-05 | 7.38E-05 | no |
| NFKBIE     | 0.15919117   | 4.257054391  | 2.36E-05 | 7.38E-05 | no |
| KATNAL2    | 0.159177186  | 4.256670719  | 2.36E-05 | 7.39E-05 | no |
| DMAP1      | -0.159156643 | -4.256107084 | 2.36E-05 | 7.41E-05 | no |
| RTN4RL2    | -0.159154607 | -4.256051236 | 2.37E-05 | 7.41E-05 | no |
| TDRD7      | 0.159148826  | 4.255892602  | 2.37E-05 | 7.41E-05 | no |
| KCNQ5      | -0.159138292 | -4.25560359  | 2.37E-05 | 7.42E-05 | no |
| CHRNE      | 0.159131297  | 4.255411676  | 2.37E-05 | 7.43E-05 | no |
| BCL2L2     | -0.159050859 | -4.253204797 | 2.39E-05 | 7.50E-05 | no |
| NCRNA00169 | 0.15903805   | 4.252853383  | 2.40E-05 | 7.51E-05 | no |
| CNNM1      | -0.158987644 | -4.251470522 | 2.41E-05 | 7.55E-05 | no |
| GPR3       | 0.158985004  | 4.251398078  | 2.41E-05 | 7.55E-05 | no |
| PDZK1IP1   | 0.158983624  | 4.251360233  | 2.41E-05 | 7.55E-05 | no |
| MOCS1      | -0.158953392 | -4.250530851 | 2.42E-05 | 7.58E-05 | no |
| PDZK1      | 0.158952195  | 4.250498     | 2.42E-05 | 7.58E-05 | no |
| JUP        | 0.158950783  | 4.250459257  | 2.42E-05 | 7.58E-05 | no |
| PRSS37     | -0.158902765 | -4.249141977 | 2.44E-05 | 7.62E-05 | no |
| ALAS1      | 0.15888946   | 4.248776953  | 2.44E-05 | 7.63E-05 | no |
| C6orf208   | -0.158886738 | -4.248702288 | 2.44E-05 | 7.63E-05 | no |
| VCP        | 0.158886377  | 4.248692387  | 2.44E-05 | 7.63E-05 | no |
| ALS2CR8    | -0.158834368 | -4.247265638 | 2.46E-05 | 7.68E-05 | no |
| MAP2K7     | -0.158833875 | -4.247252128 | 2.46E-05 | 7.68E-05 | no |
| C17orf28   | -0.158832174 | -4.247205455 | 2.46E-05 | 7.68E-05 | no |
| SETDB1     | -0.158806993 | -4.246514679 | 2.47E-05 | 7.70E-05 | no |
| CLEC14A    | 0.158799153  | 4.246299623  | 2.47E-05 | 7.71E-05 | no |
| SLC7A6OS   | -0.15878297  | -4.245855691 | 2.47E-05 | 7.72E-05 | no |



|           |              |              |          |          |    |
|-----------|--------------|--------------|----------|----------|----|
| SLC22A2   | 0.158778382  | 4.245729843  | 2.47E-05 | 7.72E-05 | no |
| SAP18     | -0.158775437 | -4.245649058 | 2.47E-05 | 7.72E-05 | no |
| GGN       | 0.158772202  | 4.24556031   | 2.48E-05 | 7.73E-05 | no |
| PUF60     | -0.158697853 | -4.243520857 | 2.50E-05 | 7.79E-05 | no |
| ZNF407    | -0.158650101 | -4.242211015 | 2.51E-05 | 7.84E-05 | no |
| CXCL3     | 0.158625586  | 4.241538569  | 2.52E-05 | 7.86E-05 | no |
| PDCD10    | 0.158597462  | 4.240767137  | 2.53E-05 | 7.88E-05 | no |
| LOXL4     | 0.158586869  | 4.240476595  | 2.53E-05 | 7.89E-05 | no |
| PLEKHG3   | -0.158562916 | -4.239819592 | 2.54E-05 | 7.91E-05 | no |
| LOC648740 | -0.15855534  | -4.23961178  | 2.54E-05 | 7.92E-05 | no |
| SGIP1     | -0.158555003 | -4.239602542 | 2.54E-05 | 7.92E-05 | no |
| LAD1      | 0.158528401  | 4.238872904  | 2.55E-05 | 7.94E-05 | no |
| CACNB4    | -0.158508742 | -4.238333681 | 2.55E-05 | 7.96E-05 | no |
| SPRED3    | 0.158498274  | 4.23804658   | 2.56E-05 | 7.97E-05 | no |
| APC       | -0.158487134 | -4.237741025 | 2.56E-05 | 7.98E-05 | no |
| ZNF594    | -0.158479145 | -4.237521921 | 2.56E-05 | 7.98E-05 | no |
| WDR63     | 0.158478578  | 4.237506349  | 2.56E-05 | 7.98E-05 | no |
| CYR61     | 0.158472115  | 4.237329108  | 2.57E-05 | 7.99E-05 | no |
| LRRC17    | 0.15844776   | 4.236661109  | 2.57E-05 | 8.01E-05 | no |
| COQ10A    | -0.158435333 | -4.236320283 | 2.58E-05 | 8.02E-05 | no |
| GRIP1     | -0.158413236 | -4.235714232 | 2.58E-05 | 8.04E-05 | no |
| MAPKAP1   | 0.158382405  | 4.234868648  | 2.59E-05 | 8.07E-05 | no |
| TMF1      | 0.158366378  | 4.234429071  | 2.60E-05 | 8.08E-05 | no |
| SLC25A28  | -0.158363164 | -4.234340936 | 2.60E-05 | 8.09E-05 | no |
| ST20      | 0.158345647  | 4.233860511  | 2.60E-05 | 8.10E-05 | no |
| KRI1      | -0.158345332 | -4.233851875 | 2.61E-05 | 8.10E-05 | no |
| GABPB2    | 0.158287777  | 4.232273391  | 2.62E-05 | 8.15E-05 | no |
| RNF40     | -0.158280722 | -4.232079935 | 2.63E-05 | 8.16E-05 | no |
| EEF1G     | -0.158275624 | -4.231940103 | 2.63E-05 | 8.16E-05 | no |
| OR7E91P   | 0.158268115  | 4.231734164  | 2.63E-05 | 8.17E-05 | no |
| LOC400940 | -0.158241661 | -4.231008682 | 2.64E-05 | 8.19E-05 | no |
| CCDC144C  | -0.158235244 | -4.230832694 | 2.64E-05 | 8.20E-05 | no |
| CAPN2     | 0.158231147  | 4.230720344  | 2.64E-05 | 8.20E-05 | no |
| DST       | -0.158230727 | -4.230708827 | 2.64E-05 | 8.20E-05 | no |
| KLHDC4    | -0.158214473 | -4.230263092 | 2.65E-05 | 8.22E-05 | no |
| DOPEY2    | 0.158189371  | 4.229574684  | 2.65E-05 | 8.24E-05 | no |
| LOC220930 | -0.158178125 | -4.229266276 | 2.66E-05 | 8.25E-05 | no |
| RPL22     | -0.158148425 | -4.228451807 | 2.67E-05 | 8.28E-05 | no |
| MKRN1     | -0.158100382 | -4.227134329 | 2.68E-05 | 8.32E-05 | no |
| WDR93     | 0.158095821  | 4.22700925   | 2.68E-05 | 8.33E-05 | no |
| ZNF845    | 0.158088667  | 4.226813084  | 2.69E-05 | 8.33E-05 | no |
| CYP39A1   | 0.158057567  | 4.225960266  | 2.70E-05 | 8.36E-05 | no |
| GPC2      | -0.158046956 | -4.225669272 | 2.70E-05 | 8.37E-05 | no |
| BCAT1     | 0.158027372  | 4.225132251  | 2.71E-05 | 8.39E-05 | no |
| TXNIP     | 0.158016801  | 4.224842392  | 2.71E-05 | 8.40E-05 | no |
| HDLBP     | 0.157947082  | 4.222930636  | 2.73E-05 | 8.47E-05 | no |
| NONO      | -0.157945359 | -4.222883391 | 2.73E-05 | 8.47E-05 | no |
| JOSD2     | 0.157939239  | 4.222715573  | 2.73E-05 | 8.47E-05 | no |
| CCDC82    | -0.157935256 | -4.22260635  | 2.74E-05 | 8.47E-05 | no |
| CSNK1A1   | 0.157929528  | 4.222449297  | 2.74E-05 | 8.48E-05 | no |
| DNER      | -0.157901291 | -4.221675045 | 2.75E-05 | 8.51E-05 | no |

|           |              |              |          |          |    |
|-----------|--------------|--------------|----------|----------|----|
| KDM3A     | -0.157878909 | -4.221061313 | 2.75E-05 | 8.53E-05 | no |
| C6orf97   | 0.157872891  | 4.220896307  | 2.76E-05 | 8.53E-05 | no |
| UTS2      | 0.157868245  | 4.220768913  | 2.76E-05 | 8.54E-05 | no |
| ZNF330    | 0.157857283  | 4.220468351  | 2.76E-05 | 8.55E-05 | no |
| RPL23AP7  | 0.157849054  | 4.220242712  | 2.76E-05 | 8.55E-05 | no |
| GGT7      | -0.157801616 | -4.218942034 | 2.78E-05 | 8.60E-05 | no |
| RPL6      | -0.157745192 | -4.217394991 | 2.80E-05 | 8.66E-05 | no |
| PIKFYVE   | -0.157743622 | -4.217351953 | 2.80E-05 | 8.66E-05 | no |
| C17orf39  | -0.157728922 | -4.21694889  | 2.80E-05 | 8.67E-05 | no |
| RNF5      | -0.157724952 | -4.216840047 | 2.80E-05 | 8.67E-05 | no |
| C9orf122  | -0.157693241 | -4.215970632 | 2.81E-05 | 8.70E-05 | no |
| ZSCAN23   | -0.157690814 | -4.215904083 | 2.82E-05 | 8.71E-05 | no |
| ARHGEF5   | 0.157687638  | 4.215817013  | 2.82E-05 | 8.71E-05 | no |
| C14orf86  | 0.157672388  | 4.215398905  | 2.82E-05 | 8.72E-05 | no |
| TBC1D10A  | -0.157638837 | -4.214479038 | 2.83E-05 | 8.76E-05 | no |
| GPRASP2   | -0.157612836 | -4.213766195 | 2.84E-05 | 8.78E-05 | no |
| RTN2      | -0.157600125 | -4.213417732 | 2.85E-05 | 8.79E-05 | no |
| SNX11     | 0.157597162  | 4.213336491  | 2.85E-05 | 8.79E-05 | no |
| UBOX5     | -0.157570448 | -4.212604098 | 2.86E-05 | 8.82E-05 | no |
| KCNJ8     | 0.15756802   | 4.212537546  | 2.86E-05 | 8.82E-05 | no |
| PYCR1     | -0.157494552 | -4.210523435 | 2.88E-05 | 8.90E-05 | no |
| OSGIN2    | -0.157482763 | -4.210200231 | 2.89E-05 | 8.91E-05 | no |
| HIST1H2BD | 0.157457719  | 4.209513676  | 2.89E-05 | 8.93E-05 | no |
| ERBB2     | 0.157441958  | 4.209081611  | 2.90E-05 | 8.95E-05 | no |
| ANKFN1    | -0.157418688 | -4.208443702 | 2.91E-05 | 8.97E-05 | no |
| C2orf39   | 0.157414066  | 4.208316982  | 2.91E-05 | 8.98E-05 | no |
| ALG10     | 0.157412945  | 4.208286252  | 2.91E-05 | 8.98E-05 | no |
| DUS2L     | -0.157409785 | -4.208199635 | 2.91E-05 | 8.98E-05 | no |
| BMS1P5    | -0.157384373 | -4.207503003 | 2.92E-05 | 9.00E-05 | no |
| MCC       | 0.157378671  | 4.207346701  | 2.92E-05 | 9.01E-05 | no |
| LGTN      | 0.157377356  | 4.207310663  | 2.92E-05 | 9.01E-05 | no |
| MUC12     | 0.157358813  | 4.206802343  | 2.93E-05 | 9.03E-05 | no |
| CACYBP    | -0.157353302 | -4.20665128  | 2.93E-05 | 9.03E-05 | no |
| GOLGA6L10 | -0.157352016 | -4.206616017 | 2.93E-05 | 9.03E-05 | no |
| CECR5     | -0.157344747 | -4.206416768 | 2.93E-05 | 9.04E-05 | no |
| CHD1      | 0.157322507  | 4.205807101  | 2.94E-05 | 9.06E-05 | no |
| DIS3L     | -0.157305401 | -4.205338195 | 2.95E-05 | 9.08E-05 | no |
| SERPINB7  | 0.157237598  | 4.203479631  | 2.97E-05 | 9.15E-05 | no |
| IGLON5    | -0.157236697 | -4.203454922 | 2.97E-05 | 9.15E-05 | no |
| FGF11     | -0.157200883 | -4.202473231 | 2.98E-05 | 9.19E-05 | no |
| DNAJC22   | 0.157182335  | 4.201964839  | 2.99E-05 | 9.20E-05 | no |
| C2orf66   | 0.157178094  | 4.201848574  | 2.99E-05 | 9.21E-05 | no |
| ZNF19     | -0.157151315 | -4.20111456  | 3.00E-05 | 9.24E-05 | no |
| GPR172A   | 0.157126668  | 4.20043899   | 3.01E-05 | 9.26E-05 | no |
| DOCK7     | 0.157124811  | 4.200388102  | 3.01E-05 | 9.26E-05 | no |
| C15orf58  | 0.157114455  | 4.200104245  | 3.01E-05 | 9.27E-05 | no |
| 1-Mar     | 0.157114125  | 4.200095214  | 3.01E-05 | 9.27E-05 | no |
| ARG1      | 0.157102514  | 4.199776952  | 3.02E-05 | 9.28E-05 | no |
| PCYT2     | -0.157094694 | -4.199562602 | 3.02E-05 | 9.29E-05 | no |
| C11orf70  | 0.157094362  | 4.199553524  | 3.02E-05 | 9.29E-05 | no |
| UNC5CL    | -0.157043033 | -4.19814664  | 3.04E-05 | 9.34E-05 | no |

|              |              |              |          |             |    |
|--------------|--------------|--------------|----------|-------------|----|
| NQ02         | 0.157039553  | 4.198051267  | 3.04E-05 | 9.35E-05    | no |
| UHK1         | 0.15703251   | 4.197858222  | 3.04E-05 | 9.35E-05    | no |
| C16orf93     | 0.157013846  | 4.197346686  | 3.05E-05 | 9.37E-05    | no |
| CYP46A1      | -0.157012529 | -4.197310601 | 3.05E-05 | 9.37E-05    | no |
| MKNK2        | 0.157008714  | 4.197206034  | 3.05E-05 | 9.37E-05    | no |
| ZNF835       | -0.156997052 | -4.196886403 | 3.06E-05 | 9.38E-05    | no |
| AK3L1        | 0.156974889  | 4.19627897   | 3.06E-05 | 9.41E-05    | no |
| UBE2G2       | -0.156972604 | -4.196216332 | 3.07E-05 | 9.41E-05    | no |
| KRTAP5-1     | -0.156962858 | -4.195949218 | 3.07E-05 | 9.42E-05    | no |
| ARFGAP1      | -0.15688745  | -4.193882523 | 3.10E-05 | 9.50E-05    | no |
| C4orf3       | 0.156866753  | 4.193315286  | 3.10E-05 | 9.52E-05    | no |
| ZNF664       | -0.156846401 | -4.192757541 | 3.11E-05 | 9.54E-05    | no |
| LOC653113    | 0.156833188  | 4.192395432  | 3.12E-05 | 9.56E-05    | no |
| NCAN         | -0.156823406 | -4.192127352 | 3.12E-05 | 9.57E-05    | no |
| MYH6         | -0.156799964 | -4.191484901 | 3.13E-05 | 9.59E-05    | no |
| AAAS         | -0.156799576 | -4.191474271 | 3.13E-05 | 9.59E-05    | no |
| SLC03A1      | 0.156749224  | 4.19009439   | 3.15E-05 | 9.65E-05    | no |
| TRUB1        | -0.156733463 | -4.189662446 | 3.15E-05 | 9.66E-05    | no |
| MYBBP1A      | -0.156712753 | -4.189094909 | 3.16E-05 | 9.69E-05    | no |
| FLJ36777     | 0.15669224   | 4.188532783  | 3.17E-05 | 9.71E-05    | no |
| S100P        | 0.156644711  | 4.187230335  | 3.19E-05 | 9.76E-05    | no |
| SLC6A8       | -0.156622128 | -4.18661148  | 3.19E-05 | 9.79E-05    | no |
| EXOC5        | -0.156590917 | -4.185756212 | 3.21E-05 | 9.82E-05    | no |
| MLYCD        | -0.156554461 | -4.184757243 | 3.22E-05 | 9.86E-05    | no |
| CXXC1        | -0.156544584 | -4.184486598 | 3.22E-05 | 9.87E-05    | no |
| DKFZp779M065 | -0.156537814 | -4.184301073 | 3.23E-05 | 9.88E-05    | no |
| SNHG6        | -0.156513281 | -4.183628852 | 3.24E-05 | 9.90E-05    | no |
| IFT80        | 0.156500347  | 4.183274436  | 3.24E-05 | 9.92E-05    | no |
| HSP90AB2P    | -0.156455624 | -4.182048971 | 3.26E-05 | 9.97E-05    | no |
| SLC16A9      | -0.156451986 | -4.181949285 | 3.26E-05 | 9.97E-05    | no |
| PLEKHG2      | 0.156425824  | 4.181232433  | 3.27E-05 | 0.000100001 | no |
| GPR44        | -0.156414918 | -4.180933628 | 3.27E-05 | 0.000100114 | no |
| MSRB3        | 0.156390167  | 4.180255431  | 3.28E-05 | 0.000100391 | no |
| SFTPA2       | -0.156378254 | -4.179929024 | 3.29E-05 | 0.000100516 | no |
| NME1-NME2    | -0.156365156 | -4.179570152 | 3.29E-05 | 0.00010065  | no |
| ZNF318       | -0.156364329 | -4.179547487 | 3.29E-05 | 0.00010065  | no |
| RASA4P       | -0.156349636 | -4.179144912 | 3.30E-05 | 0.000100809 | no |
| NAT6         | -0.156345004 | -4.179018001 | 3.30E-05 | 0.000100848 | no |
| ZDHHC13      | 0.156313501  | 4.178154836  | 3.31E-05 | 0.000101207 | no |
| C9orf135     | 0.156301407  | 4.177823485  | 3.32E-05 | 0.000101336 | no |
| WTIP         | 0.156297752  | 4.177723343  | 3.32E-05 | 0.000101364 | no |
| ACP6         | 0.156276761  | 4.177148225  | 3.33E-05 | 0.000101599 | no |
| RRN3P2       | 0.156263533  | 4.176785807  | 3.33E-05 | 0.000101741 | no |
| ZNF563       | 0.156258365  | 4.176644211  | 3.33E-05 | 0.000101781 | no |
| FLJ39582     | -0.156257645 | -4.176624482 | 3.33E-05 | 0.000101781 | no |
| JAKMIP3      | -0.156232855 | -4.175945299 | 3.34E-05 | 0.000102062 | no |
| GABARAPL3    | -0.156217435 | -4.175522815 | 3.35E-05 | 0.000102232 | no |
| C20orf123    | 0.156205971  | 4.175208726  | 3.35E-05 | 0.000102354 | no |
| CXCL1        | 0.156185682  | 4.174652873  | 3.36E-05 | 0.000102583 | no |
| KIF9         | 0.156178703  | 4.174461652  | 3.37E-05 | 0.000102651 | no |
| RDX          | 0.156156238  | 4.173846199  | 3.37E-05 | 0.000102907 | no |

|            |              |              |          |             |    |
|------------|--------------|--------------|----------|-------------|----|
| UEVLD      | 0.15613856   | 4.173361884  | 3.38E-05 | 0.000103105 | no |
| CLUAP1     | -0.156136531 | -4.173306284 | 3.38E-05 | 0.000103114 | no |
| APRT       | 0.156070764  | 4.171504545  | 3.41E-05 | 0.000103897 | no |
| MGC23284   | -0.156063851 | -4.171315154 | 3.41E-05 | 0.000103966 | no |
| DSN1       | 0.156030622  | 4.17040484   | 3.42E-05 | 0.000104356 | no |
| DEXI       | -0.156012582 | -4.169910626 | 3.43E-05 | 0.000104561 | no |
| MRPS6      | 0.156002631  | 4.169638028  | 3.44E-05 | 0.000104668 | no |
| TAS2R31    | -0.155982487 | -4.169086191 | 3.44E-05 | 0.000104899 | no |
| DCDC2      | 0.155958182  | 4.168420374  | 3.45E-05 | 0.000105183 | no |
| LOC619207  | -0.15595343  | -4.168290197 | 3.46E-05 | 0.000105225 | no |
| SNCB       | -0.155927407 | -4.167577319 | 3.47E-05 | 0.000105531 | no |
| KPNA4      | 0.155918643  | 4.167337247  | 3.47E-05 | 0.000105624 | no |
| C14orf178  | -0.155907419 | -4.167029782 | 3.47E-05 | 0.000105747 | no |
| COG5       | 0.155802246  | 4.164148806  | 3.52E-05 | 0.000107038 | no |
| C5orf45    | -0.155801214 | -4.164120521 | 3.52E-05 | 0.000107038 | no |
| TNFRSF19   | 0.155771832  | 4.163315691  | 3.53E-05 | 0.000107391 | no |
| ANK1       | -0.155760085 | -4.16299392  | 3.53E-05 | 0.000107523 | no |
| DSTYK      | -0.155755659 | -4.162872701 | 3.54E-05 | 0.000107562 | no |
| GTF2H2     | 0.155734528  | 4.162293888  | 3.55E-05 | 0.000107812 | no |
| ST6GALNAC4 | 0.155722969  | 4.161977283  | 3.55E-05 | 0.000107942 | no |
| SPEN       | -0.155600615 | -4.158625974 | 3.60E-05 | 0.000109482 | no |
| AIM1L      | 0.155593034  | 4.15841833   | 3.60E-05 | 0.000109563 | no |
| SLC2A14    | 0.155473299  | 4.155138973  | 3.66E-05 | 0.000111091 | no |
| KIAA0087   | -0.15544886  | -4.154469631 | 3.67E-05 | 0.000111392 | no |
| PLEKHF1    | 0.155423175  | 4.153766216  | 3.68E-05 | 0.00011171  | no |
| CYTH3      | 0.155386289  | 4.152756024  | 3.69E-05 | 0.000112175 | no |
| C14orf21   | -0.15535153  | -4.15180408  | 3.71E-05 | 0.000112615 | no |
| SLC39A6    | -0.15532015  | -4.150944706 | 3.72E-05 | 0.000113011 | no |
| EED        | 0.155291934  | 4.150172011  | 3.73E-05 | 0.000113367 | no |
| KCTD5      | -0.155264279 | -4.149414658 | 3.75E-05 | 0.000113717 | no |
| GPS1       | -0.155260033 | -4.149298377 | 3.75E-05 | 0.000113756 | no |
| MPST       | -0.155229103 | -4.148451386 | 3.76E-05 | 0.00011415  | no |
| THAP11     | -0.15522635  | -4.148375988 | 3.76E-05 | 0.00011417  | no |
| TNIK       | -0.155211127 | -4.147959119 | 3.77E-05 | 0.000114356 | no |
| GRIP2      | -0.155160143 | -4.146562958 | 3.79E-05 | 0.000115021 | no |
| MDC1       | -0.155131691 | -4.145783864 | 3.80E-05 | 0.000115386 | no |
| H19        | 0.155060719  | 4.14384044   | 3.84E-05 | 0.000116327 | no |
| GPAM       | -0.155059089 | -4.1437958   | 3.84E-05 | 0.000116332 | no |
| APCDD1L    | 0.155055454  | 4.143696267  | 3.84E-05 | 0.000116364 | no |
| GYPE       | 0.154992981  | 4.141985647  | 3.87E-05 | 0.000117196 | no |
| LOC728758  | 0.154988635  | 4.141866641  | 3.87E-05 | 0.000117238 | no |
| NAA16      | -0.154950103 | -4.140811606 | 3.89E-05 | 0.000117748 | no |
| LLGL1      | -0.154946288 | -4.140707141 | 3.89E-05 | 0.000117783 | no |
| INTS2      | -0.154923262 | -4.140076666 | 3.90E-05 | 0.000118081 | no |
| GTF2B      | 0.154916751  | 4.139898394  | 3.90E-05 | 0.000118153 | no |
| COX15      | -0.15488079  | -4.138913781 | 3.92E-05 | 0.000118631 | no |
| TCTA       | 0.154878165  | 4.138841893  | 3.92E-05 | 0.00011865  | no |
| TNMD       | 0.154876044  | 4.138783828  | 3.92E-05 | 0.000118661 | no |
| ZNF667     | -0.154870359 | -4.138628186 | 3.92E-05 | 0.000118722 | no |
| PCP2       | 0.154853923  | 4.13817816   | 3.93E-05 | 0.00011892  | no |
| LOC441294  | 0.154853464  | 4.138165586  | 3.93E-05 | 0.00011892  | no |

|              |              |              |          |             |    |
|--------------|--------------|--------------|----------|-------------|----|
| LOC100289341 | -0.154842502 | -4.137865468 | 3.93E-05 | 0.000119054 | no |
| ELOVL6       | 0.154803951  | 4.136809962  | 3.95E-05 | 0.000119572 | no |
| PLA2G2A      | 0.154800885  | 4.13672602   | 3.95E-05 | 0.000119597 | no |
| RASGRF1      | -0.154778104 | -4.136102284 | 3.96E-05 | 0.000119896 | no |
| SSPO         | -0.15476731  | -4.135806779 | 3.97E-05 | 0.000120029 | no |
| DNAJC5       | -0.154735075 | -4.13492422  | 3.98E-05 | 0.000120454 | no |
| RPGR         | 0.1547334    | 4.134878364  | 3.98E-05 | 0.000120454 | no |
| ZNF682       | -0.154733094 | -4.134869997 | 3.98E-05 | 0.000120454 | no |
| AQP7         | -0.154718856 | -4.134480185 | 3.99E-05 | 0.000120636 | no |
| SOX30        | 0.154690813  | 4.133712428  | 4.00E-05 | 0.000121012 | no |
| FMN2         | -0.154674824 | -4.133274688 | 4.01E-05 | 0.000121219 | no |
| HCN2         | -0.154671067 | -4.133171842 | 4.01E-05 | 0.000121254 | no |
| LOC284551    | 0.154651689  | 4.132641318  | 4.02E-05 | 0.000121509 | no |
| ANKK1        | 0.154646467  | 4.132498371  | 4.02E-05 | 0.000121565 | no |
| ZNF286A      | -0.154637545 | -4.1322541   | 4.03E-05 | 0.000121673 | no |
| JMJD7-PLA2G4 | -0.154636038 | -4.132212858 | 4.03E-05 | 0.000121676 | no |
| TTC23L       | 0.154628108  | 4.131995753  | 4.03E-05 | 0.00012177  | no |
| CNTROB       | -0.154567893 | -4.130347274 | 4.06E-05 | 0.000122607 | no |
| CHRNA9       | 0.154538179  | 4.129533845  | 4.08E-05 | 0.000123013 | no |
| INPP5K       | -0.154513902 | -4.128869238 | 4.09E-05 | 0.000123342 | no |
| SPEF2        | 0.154474709  | 4.127796337  | 4.11E-05 | 0.000123886 | no |
| CCL8         | 0.15446044   | 4.127405723  | 4.11E-05 | 0.000124073 | no |
| AP3S2        | -0.15444882  | -4.127087651 | 4.12E-05 | 0.000124222 | no |
| PUS7         | 0.154447199  | 4.127043271  | 4.12E-05 | 0.000124227 | no |
| P704P        | 0.154421191  | 4.126331317  | 4.13E-05 | 0.000124584 | no |
| SBF2         | -0.154414615 | -4.126151308 | 4.13E-05 | 0.000124661 | no |
| AP4M1        | 0.154362168  | 4.124715632  | 4.16E-05 | 0.000125404 | no |
| ZNF675       | -0.154350977 | -4.124409302 | 4.17E-05 | 0.000125548 | no |
| C8orf77      | -0.154340063 | -4.124110559 | 4.17E-05 | 0.000125688 | no |
| SF3A3        | 0.154333944  | 4.123943067  | 4.17E-05 | 0.000125743 | no |
| FAM186B      | 0.154333724  | 4.123937034  | 4.17E-05 | 0.000125743 | no |
| UTP20        | 0.15430743   | 4.123217304  | 4.19E-05 | 0.000126109 | no |
| NRAS         | 0.154300822  | 4.123036432  | 4.19E-05 | 0.000126187 | no |
| ACAT1        | -0.154277803 | -4.122406345 | 4.20E-05 | 0.000126505 | no |
| KLHL17       | -0.154255205 | -4.121787783 | 4.21E-05 | 0.000126818 | no |
| SRPK2        | -0.15424702  | -4.121563754 | 4.22E-05 | 0.00012692  | no |
| OXNAD1       | 0.154242642  | 4.121443932  | 4.22E-05 | 0.000126966 | no |
| ANKRD7       | 0.15422071   | 4.120843613  | 4.23E-05 | 0.00012727  | no |
| PPP4R4       | -0.154214298 | -4.12066809  | 4.23E-05 | 0.000127346 | no |
| ADAMTS20     | -0.154199024 | -4.120250029 | 4.24E-05 | 0.000127553 | no |
| RSPH4A       | 0.154194783  | 4.120133956  | 4.24E-05 | 0.000127596 | no |
| SETD8        | 0.154142734  | 4.11870932   | 4.27E-05 | 0.00012835  | no |
| RFC2         | 0.154121374  | 4.118124692  | 4.28E-05 | 0.000128649 | no |
| C14orf28     | -0.154089727 | -4.117258528 | 4.29E-05 | 0.000129102 | no |
| FBXL15       | -0.154083792 | -4.117096084 | 4.30E-05 | 0.000129172 | no |
| ACIN1        | -0.154054373 | -4.116290914 | 4.31E-05 | 0.000129593 | no |
| SRA1         | 0.15405106   | 4.116200233  | 4.31E-05 | 0.000129624 | no |
| HTR1A        | -0.154034712 | -4.115752811 | 4.32E-05 | 0.00012985  | no |
| AKR7L        | -0.154008658 | -4.115039729 | 4.33E-05 | 0.000130224 | no |
| DLG2         | -0.153968301 | -4.113935222 | 4.35E-05 | 0.000130814 | no |
| FAM164A      | -0.153955136 | -4.113574921 | 4.36E-05 | 0.000130994 | no |

|          |              |              |          |             |    |
|----------|--------------|--------------|----------|-------------|----|
| C19orf57 | -0.153941422 | -4.113199594 | 4.37E-05 | 0.000131183 | no |
| TMPPE    | 0.153931983  | 4.112941267  | 4.37E-05 | 0.000131303 | no |
| MSL3L2   | 0.153930974  | 4.112913665  | 4.37E-05 | 0.000131303 | no |
| CLEC18A  | 0.15392297   | 4.112694607  | 4.38E-05 | 0.000131405 | no |
| CLEC18C  | 0.153898249  | 4.112018071  | 4.39E-05 | 0.000131751 | no |
| NUDT22   | 0.153897052  | 4.111985311  | 4.39E-05 | 0.000131751 | no |
| DNASE1   | -0.153896374 | -4.111966741 | 4.39E-05 | 0.000131751 | no |
| GTF3A    | 0.15386519   | 4.111113347  | 4.41E-05 | 0.000132208 | no |
| CCDC34   | 0.153845861  | 4.110584375  | 4.42E-05 | 0.000132484 | no |
| P2RY11   | 0.153837401  | 4.110352852  | 4.42E-05 | 0.000132595 | no |
| ALKBH2   | -0.153834292 | -4.110267769 | 4.42E-05 | 0.000132623 | no |
| UGDH     | 0.153823281  | 4.10996643   | 4.43E-05 | 0.000132772 | no |
| GJA5     | 0.153821753  | 4.109924604  | 4.43E-05 | 0.000132776 | no |
| GOLGA6L9 | -0.153812831 | -4.109680464 | 4.43E-05 | 0.000132893 | no |
| EXT1     | 0.15378356   | 4.108879436  | 4.45E-05 | 0.000133324 | no |
| ADH5     | 0.153762318  | 4.108298132  | 4.46E-05 | 0.000133632 | no |
| C7orf30  | 0.153753782  | 4.108064532  | 4.46E-05 | 0.000133744 | no |
| ZNF451   | -0.153726544 | -4.107319147 | 4.48E-05 | 0.000134146 | no |
| SENP5    | -0.153715551 | -4.107018348 | 4.48E-05 | 0.000134297 | no |
| ADAMTS15 | 0.153703626  | 4.106692008  | 4.49E-05 | 0.000134463 | no |
| IGFBP2   | 0.153694697  | 4.10644768   | 4.49E-05 | 0.000134581 | no |
| FNTA     | 0.15368974   | 4.106312014  | 4.50E-05 | 0.000134639 | no |
| CLSTN2   | -0.153684828 | -4.10617761  | 4.50E-05 | 0.000134695 | no |
| MAML2    | -0.153661269 | -4.10553292  | 4.51E-05 | 0.000135042 | no |
| BNIP3    | -0.153659463 | -4.105483519 | 4.51E-05 | 0.000135047 | no |
| POLR3B   | -0.153658388 | -4.105454103 | 4.51E-05 | 0.000135047 | no |
| SAP30    | 0.153636578  | 4.104857289  | 4.52E-05 | 0.000135368 | no |
| LLPH     | 0.153631838  | 4.104727585  | 4.53E-05 | 0.000135401 | no |
| PPM1K    | -0.153631335 | -4.104713811 | 4.53E-05 | 0.000135401 | no |
| XKR4     | -0.15363066  | -4.104695349 | 4.53E-05 | 0.000135401 | no |
| SCN9A    | 0.153628803  | 4.10464452   | 4.53E-05 | 0.00013541  | no |
| NDNL2    | 0.153592908  | 4.103662326  | 4.55E-05 | 0.000135952 | no |
| LMAN2L   | 0.153572328  | 4.10309918   | 4.56E-05 | 0.000136256 | no |
| LPAL2    | -0.15354399  | -4.102323771 | 4.57E-05 | 0.000136682 | no |
| PTPRH    | 0.153526883  | 4.101855674  | 4.58E-05 | 0.000136932 | no |
| EXTL2    | 0.153512217  | 4.1014544    | 4.59E-05 | 0.000137144 | no |
| S100A2   | 0.153503596  | 4.101218504  | 4.59E-05 | 0.000137261 | no |
| ZNF282   | -0.153495688 | -4.101002131 | 4.60E-05 | 0.000137366 | no |
| CLK4     | -0.153488297 | -4.100799888 | 4.60E-05 | 0.000137463 | no |
| PER3     | -0.153466051 | -4.100191209 | 4.61E-05 | 0.000137796 | no |
| ELN      | 0.153402092  | 4.098441203  | 4.65E-05 | 0.000138796 | no |
| YSK4     | 0.153372337  | 4.097627091  | 4.66E-05 | 0.000139253 | no |
| EEF2K    | 0.15335997   | 4.097288718  | 4.67E-05 | 0.000139431 | no |
| ZNF684   | 0.153339923  | 4.096740217  | 4.68E-05 | 0.000139733 | no |
| POMP     | 0.153319947  | 4.096193685  | 4.69E-05 | 0.000140035 | no |
| ARL8A    | -0.153312774 | -4.095997442 | 4.70E-05 | 0.00014013  | no |
| PRPF38B  | 0.153292234  | 4.095435461  | 4.71E-05 | 0.000140442 | no |
| FGD5     | 0.15327933   | 4.09508243   | 4.72E-05 | 0.00014063  | no |
| CCNY     | -0.153252891 | -4.09435908  | 4.73E-05 | 0.000141039 | no |
| NACA     | -0.153249474 | -4.094265601 | 4.73E-05 | 0.000141073 | no |
| WDR86    | -0.153245844 | -4.094166272 | 4.73E-05 | 0.000141112 | no |

|           |              |              |          |             |    |
|-----------|--------------|--------------|----------|-------------|----|
| ADAM19    | 0.153237401  | 4.09393528   | 4.74E-05 | 0.000141228 | no |
| BBS4      | 0.153202716  | 4.092986361  | 4.76E-05 | 0.000141773 | no |
| TSPYL1    | -0.153199826 | -4.092907288 | 4.76E-05 | 0.000141799 | no |
| TMBIM6    | 0.153134462  | 4.091119066  | 4.79E-05 | 0.00014285  | no |
| TCF3      | -0.153119756 | -4.090716757 | 4.80E-05 | 0.000143072 | no |
| NGLY1     | 0.153105501  | 4.090326771  | 4.81E-05 | 0.000143286 | no |
| ADCY4     | 0.153084222  | 4.089744647  | 4.82E-05 | 0.000143616 | no |
| TXNDC15   | 0.153078575  | 4.089590171  | 4.83E-05 | 0.000143688 | no |
| CCDC111   | 0.15306252   | 4.089150962  | 4.83E-05 | 0.000143933 | no |
| TMEM57    | -0.153051337 | -4.088845034 | 4.84E-05 | 0.000144097 | no |
| TXNDC17   | 0.152991002  | 4.08719453   | 4.87E-05 | 0.00014508  | no |
| EIF3I     | 0.15297427   | 4.086736806  | 4.88E-05 | 0.000145338 | no |
| TBC1D26   | -0.15294808  | -4.086020376 | 4.90E-05 | 0.000145756 | no |
| EVI2A     | 0.152943549  | 4.085896417  | 4.90E-05 | 0.00014581  | no |
| C12orf63  | 0.152906499  | 4.08488294   | 4.92E-05 | 0.000146411 | no |
| LIMCH1    | -0.152903252 | -4.08479411  | 4.92E-05 | 0.000146445 | no |
| IFIT2     | 0.15282968   | 4.08278163   | 4.97E-05 | 0.000147667 | no |
| MED7      | 0.152811789  | 4.082292257  | 4.98E-05 | 0.00014795  | no |
| IL29      | 0.152780661  | 4.081440809  | 4.99E-05 | 0.000148458 | no |
| MLXIP     | 0.152776648  | 4.081331028  | 5.00E-05 | 0.000148505 | no |
| SYNM      | 0.152752245  | 4.080663542  | 5.01E-05 | 0.0001489   | no |
| PIGO      | 0.152736061  | 4.08022087   | 5.02E-05 | 0.000149155 | no |
| TTPA      | -0.152718963 | -4.079753224 | 5.03E-05 | 0.000149427 | no |
| C1orf113  | 0.152705548  | 4.079386294  | 5.04E-05 | 0.000149635 | no |
| LOC150776 | -0.152677732 | -4.078625472 | 5.05E-05 | 0.000150092 | no |
| RAD54B    | 0.152665375  | 4.078287486  | 5.06E-05 | 0.000150283 | no |
| FAM104B   | -0.152609154 | -4.076749781 | 5.09E-05 | 0.000151234 | no |
| ATRNL1    | -0.152603549 | -4.076596483 | 5.10E-05 | 0.00015131  | no |
| HAGH      | -0.152596928 | -4.076415389 | 5.10E-05 | 0.000151402 | no |
| VEPH1     | -0.152591542 | -4.076268083 | 5.10E-05 | 0.000151474 | no |
| ARAP3     | 0.152589904  | 4.076223281  | 5.10E-05 | 0.00015148  | no |
| NOL10     | 0.15256302   | 4.075488     | 5.12E-05 | 0.000151926 | no |
| DNAJC6    | -0.152561391 | -4.075443467 | 5.12E-05 | 0.000151932 | no |
| RNF103    | -0.15254345  | -4.074952783 | 5.13E-05 | 0.000152223 | no |
| DNAJB2    | -0.152516172 | -4.074206731 | 5.15E-05 | 0.000152678 | no |
| ANAPC10   | 0.152511642  | 4.074082846  | 5.15E-05 | 0.000152735 | no |
| KIAA0284  | -0.152508542 | -4.07399806  | 5.15E-05 | 0.000152767 | no |
| RNF121    | -0.152485002 | -4.073354264 | 5.17E-05 | 0.000153158 | no |
| TPMT      | 0.152480425  | 4.073229078  | 5.17E-05 | 0.000153216 | no |
| C5orf56   | 0.152467506  | 4.072875759  | 5.18E-05 | 0.00015342  | no |
| RPL7A     | -0.152454176 | -4.072511187 | 5.18E-05 | 0.000153633 | no |
| BEND5     | -0.152436914 | -4.072039096 | 5.19E-05 | 0.000153914 | no |
| R3HCC1    | -0.152424496 | -4.071699503 | 5.20E-05 | 0.000154111 | no |
| H1FOO     | 0.152408936  | 4.071273947  | 5.21E-05 | 0.000154364 | no |
| FMN1      | 0.152384137  | 4.070595745  | 5.23E-05 | 0.000154781 | no |
| OR2A7     | 0.152358734  | 4.069901039  | 5.24E-05 | 0.00015521  | no |
| JAG1      | 0.152354588  | 4.069787667  | 5.24E-05 | 0.00015526  | no |
| NPL0C4    | 0.152353363  | 4.069754151  | 5.24E-05 | 0.00015526  | no |
| GATSL1    | -0.15232396  | -4.068950079 | 5.26E-05 | 0.000155761 | no |
| ZNF526    | 0.152318464  | 4.06879978   | 5.27E-05 | 0.000155836 | no |
| PRRG2     | 0.152260662  | 4.067219075  | 5.30E-05 | 0.000156849 | no |

|            |              |              |          |             |    |
|------------|--------------|--------------|----------|-------------|----|
| STC1       | 0.15225027   | 4.066934904  | 5.31E-05 | 0.000157013 | no |
| GTF2IRD2P1 | -0.15222786  | -4.06632209  | 5.32E-05 | 0.000157394 | no |
| WDSUB1     | 0.152218193  | 4.066057739  | 5.33E-05 | 0.000157545 | no |
| PHRF1      | -0.152181468 | -4.065053479 | 5.35E-05 | 0.000158186 | no |
| NTN4       | -0.152179685 | -4.065004708 | 5.35E-05 | 0.000158195 | no |
| NAA15      | 0.152149179  | 4.064170539  | 5.37E-05 | 0.000158725 | no |
| AFAP1      | -0.152131644 | -4.063691033 | 5.38E-05 | 0.000159021 | no |
| ST8SIA1    | -0.15207021  | -4.062011182 | 5.42E-05 | 0.00016012  | no |
| NIT2       | 0.1520626    | 4.061803096  | 5.42E-05 | 0.000160236 | no |
| LIPH       | 0.152057332  | 4.061659037  | 5.43E-05 | 0.000160309 | no |
| KIAA1257   | 0.152049855  | 4.061454598  | 5.43E-05 | 0.000160423 | no |
| LOC284276  | 0.152031133  | 4.060942677  | 5.44E-05 | 0.000160743 | no |
| GFRA1      | -0.152025259 | -4.060782062 | 5.45E-05 | 0.000160828 | no |
| PAX8       | 0.152022463  | 4.060705608  | 5.45E-05 | 0.000160856 | no |
| TMEM132B   | -0.152006612 | -4.0602722   | 5.46E-05 | 0.000161124 | no |
| MKLN1      | -0.151988598 | -4.059779652 | 5.47E-05 | 0.000161433 | no |
| CDH9       | -0.151977521 | -4.059476765 | 5.48E-05 | 0.000161614 | no |
| ANKRD36B   | -0.151974836 | -4.059403354 | 5.48E-05 | 0.00016164  | no |
| PPP2R2C    | -0.151934648 | -4.058304531 | 5.50E-05 | 0.000162361 | no |
| ZCCHC5     | 0.151912566  | 4.057700748  | 5.52E-05 | 0.000162748 | no |
| PHAX       | -0.151908111 | -4.057578946 | 5.52E-05 | 0.000162807 | no |
| HTR2A      | -0.151885005 | -4.056947208 | 5.53E-05 | 0.000163214 | no |
| C11orf57   | -0.151865594 | -4.056416488 | 5.55E-05 | 0.000163552 | no |
| MAK16      | 0.151825669  | 4.055324906  | 5.57E-05 | 0.000164276 | no |
| CAPZA2     | 0.151793153  | 4.054435898  | 5.59E-05 | 0.000164864 | no |
| CASP2      | 0.151780427  | 4.054087974  | 5.60E-05 | 0.000165079 | no |
| TIMP2      | 0.151766228  | 4.053699775  | 5.61E-05 | 0.000165323 | no |
| CNOT6      | -0.151762113 | -4.053587255 | 5.61E-05 | 0.000165377 | no |
| VTA1       | -0.151756107 | -4.053423069 | 5.62E-05 | 0.000165466 | no |
| TFE3       | 0.151751653  | 4.053301273  | 5.62E-05 | 0.000165526 | no |
| BAI2       | -0.151746198 | -4.053152138 | 5.62E-05 | 0.000165605 | no |
| C6orf124   | -0.151738893 | -4.052952433 | 5.63E-05 | 0.000165719 | no |
| PTK2       | -0.151725828 | -4.052595246 | 5.64E-05 | 0.000165943 | no |
| GTPBP4     | -0.151720269 | -4.052443252 | 5.64E-05 | 0.000166024 | no |
| CPNE2      | -0.151687635 | -4.05155108  | 5.66E-05 | 0.000166619 | no |
| ZNF345     | 0.151673324  | 4.051159837  | 5.67E-05 | 0.000166868 | no |
| FAM110A    | -0.151624038 | -4.049812421 | 5.70E-05 | 0.000167784 | no |
| TTLL2      | -0.151605958 | -4.049318158 | 5.71E-05 | 0.000168106 | no |
| IFT27      | -0.15153955  | -4.047502749 | 5.76E-05 | 0.00016936  | no |
| GRIN1      | -0.151530828 | -4.047264295 | 5.76E-05 | 0.000169504 | no |
| PAR4       | -0.151529366 | -4.047224333 | 5.76E-05 | 0.000169508 | no |
| NMNAT3     | 0.151527236  | 4.047166112  | 5.76E-05 | 0.000169524 | no |
| SSBP1      | 0.151518522  | 4.046927893  | 5.77E-05 | 0.000169668 | no |
| SLC34A2    | 0.151474612  | 4.045727547  | 5.80E-05 | 0.000170495 | no |
| DPEP1      | 0.151459412  | 4.045312041  | 5.81E-05 | 0.000170766 | no |
| FLJ32063   | -0.151452187 | -4.045114556 | 5.81E-05 | 0.000170851 | no |
| FEZF2      | -0.151451473 | -4.04509503  | 5.81E-05 | 0.000170851 | no |
| HTR1D      | 0.151451199  | 4.045087545  | 5.81E-05 | 0.000170851 | no |
| C6orf141   | 0.151421964  | 4.044288383  | 5.83E-05 | 0.000171397 | no |
| MYST3      | -0.15141881  | -4.044202178 | 5.84E-05 | 0.000171427 | no |
| ZNF347     | 0.151417883  | 4.044176813  | 5.84E-05 | 0.000171427 | no |



|            |              |              |          |             |    |
|------------|--------------|--------------|----------|-------------|----|
| C7orf57    | 0.151399512  | 4.043674653  | 5.85E-05 | 0.000171761 | no |
| PLAG1      | 0.151385621  | 4.043294928  | 5.86E-05 | 0.000172008 | no |
| CYGB       | 0.151376681  | 4.043050566  | 5.86E-05 | 0.000172158 | no |
| ZNF876P    | -0.151374616 | -4.042994122 | 5.87E-05 | 0.000172174 | no |
| TCF21      | 0.151341274  | 4.042082731  | 5.89E-05 | 0.000172804 | no |
| SCN11A     | -0.151325041 | -4.041639009 | 5.90E-05 | 0.000173099 | no |
| GPR148     | -0.151321105 | -4.04153141  | 5.90E-05 | 0.000173151 | no |
| HS3ST3B1   | 0.151277524  | 4.040340173  | 5.93E-05 | 0.000173988 | no |
| ZNF786     | -0.151256657 | -4.039769809 | 5.95E-05 | 0.000174376 | no |
| ANK3       | -0.151247362 | -4.039515746 | 5.95E-05 | 0.000174535 | no |
| FBX031     | -0.151237352 | -4.03924214  | 5.96E-05 | 0.000174709 | no |
| SERINC5    | -0.151236097 | -4.039207828 | 5.96E-05 | 0.000174709 | no |
| FAM70A     | 0.151234307  | 4.03915892   | 5.96E-05 | 0.000174719 | no |
| ZNF286B    | -0.151210661 | -4.038512583 | 5.98E-05 | 0.000175165 | no |
| CHRM1      | -0.151192787 | -4.03802405  | 5.99E-05 | 0.000175496 | no |
| C14orf143  | 0.151180359  | 4.037684362  | 6.00E-05 | 0.000175719 | no |
| CTDSP1     | 0.151172694  | 4.03747487   | 6.00E-05 | 0.000175847 | no |
| GOLM1      | -0.151162675 | -4.037201018 | 6.01E-05 | 0.000176022 | no |
| GAP43      | 0.151157497  | 4.037059487  | 6.01E-05 | 0.0001761   | no |
| ADIG       | 0.151146162  | 4.036749673  | 6.02E-05 | 0.000176302 | no |
| C20orf29   | 0.151126194  | 4.036203916  | 6.03E-05 | 0.000176677 | no |
| NDE1       | 0.15112366   | 4.036134665  | 6.04E-05 | 0.000176702 | no |
| FAM177A1   | -0.151082977 | -4.035022735 | 6.06E-05 | 0.000177496 | no |
| CIB1       | 0.151040643  | 4.033865713  | 6.09E-05 | 0.000178327 | no |
| DYNC1LI2   | -0.15100814  | -4.032977388 | 6.12E-05 | 0.000178945 | no |
| BCKDK      | 0.151007675  | 4.032964669  | 6.12E-05 | 0.000178945 | no |
| DEPDC5     | -0.150986331 | -4.032381346 | 6.13E-05 | 0.000179354 | no |
| KNDC1      | -0.150951393 | -4.031426487 | 6.16E-05 | 0.000180041 | no |
| MLF1       | 0.150946051  | 4.03128051   | 6.16E-05 | 0.000180124 | no |
| ZNF605     | -0.150909746 | -4.030288327 | 6.18E-05 | 0.000180843 | no |
| GXYLT1     | 0.150863308  | 4.029019219  | 6.22E-05 | 0.000181773 | no |
| C13orf1    | -0.150783901 | -4.026849186 | 6.27E-05 | 0.000183393 | no |
| E2F8       | 0.150761299  | 4.026231541  | 6.29E-05 | 0.000183837 | no |
| EARS2      | -0.150756014 | -4.026087116 | 6.29E-05 | 0.000183921 | no |
| INO80D     | -0.150734894 | -4.025509989 | 6.31E-05 | 0.000184336 | no |
| TDRKH      | -0.150693557 | -4.024380384 | 6.34E-05 | 0.000185174 | no |
| PKP4       | -0.150692341 | -4.024347152 | 6.34E-05 | 0.000185174 | no |
| C3orf19    | -0.150670152 | -4.02374081  | 6.35E-05 | 0.000185614 | no |
| KDELC1     | 0.150660838  | 4.023486305  | 6.36E-05 | 0.000185784 | no |
| WEE1       | 0.150609056  | 4.022071338  | 6.40E-05 | 0.000186851 | no |
| ZNF169     | -0.150602983 | -4.021905371 | 6.40E-05 | 0.000186953 | no |
| HCG11      | 0.150565413  | 4.020878781  | 6.43E-05 | 0.000187724 | no |
| TAS2R3     | -0.150550359 | -4.020467432 | 6.44E-05 | 0.000188017 | no |
| C5orf38    | -0.150542491 | -4.020252452 | 6.45E-05 | 0.000188158 | no |
| DNAJB12    | -0.150531499 | -4.019952106 | 6.46E-05 | 0.000188365 | no |
| C1QTNF2    | 0.150508307  | 4.0193184    | 6.47E-05 | 0.00018882  | no |
| ELOVL4     | -0.15050769  | -4.019301554 | 6.47E-05 | 0.00018882  | no |
| RAB40AL    | -0.150499482 | -4.019077285 | 6.48E-05 | 0.000188953 | no |
| C10orf18   | -0.150498922 | -4.019061968 | 6.48E-05 | 0.000188953 | no |
| CSGALNACT2 | 0.150455445  | 4.01787402   | 6.51E-05 | 0.000189858 | no |
| ZMYM1      | 0.150439652  | 4.017442525  | 6.52E-05 | 0.000190171 | no |

|              |              |              |          |             |    |
|--------------|--------------|--------------|----------|-------------|----|
| ABCA10       | 0.150422527  | 4.016974612  | 6.54E-05 | 0.000190513 | no |
| INTS9        | 0.150413046  | 4.016715556  | 6.54E-05 | 0.000190669 | no |
| MYO18A       | -0.150381969 | -4.015866448 | 6.57E-05 | 0.000191335 | no |
| TSPAN32      | 0.150335892  | 4.014607537  | 6.60E-05 | 0.000192308 | no |
| RNF181       | 0.150297332  | 4.013554027  | 6.63E-05 | 0.000193121 | no |
| LOC100302401 | 0.150288664  | 4.013317205  | 6.64E-05 | 0.000193283 | no |
| GPR19        | -0.150276038 | -4.012972253 | 6.65E-05 | 0.000193531 | no |
| KLF5         | 0.15026427   | 4.012650741  | 6.65E-05 | 0.000193761 | no |
| KRT222       | -0.150225512 | -4.01159185  | 6.68E-05 | 0.000194585 | no |
| SCN2A        | -0.150220926 | -4.011466565 | 6.69E-05 | 0.000194657 | no |
| P2RX6        | -0.150204276 | -4.011011658 | 6.70E-05 | 0.000194969 | no |
| C19orf55     | 0.150204253  | 4.01101105   | 6.70E-05 | 0.000194969 | no |
| RPF1         | 0.150186529  | 4.010526828  | 6.71E-05 | 0.000195332 | no |
| PTPN13       | 0.150173509  | 4.010171113  | 6.72E-05 | 0.000195592 | no |
| BPI          | 0.150149989  | 4.009528565  | 6.74E-05 | 0.000196084 | no |
| SEN2         | -0.150135193 | -4.009124343 | 6.75E-05 | 0.000196384 | no |
| TAF5L        | -0.150121769 | -4.008757613 | 6.76E-05 | 0.000196654 | no |
| RBM9         | -0.150119737 | -4.008702103 | 6.76E-05 | 0.000196671 | no |
| SYNE1        | -0.150114651 | -4.008563149 | 6.77E-05 | 0.000196756 | no |
| LOC283856    | -0.150110167 | -4.008440661 | 6.77E-05 | 0.000196827 | no |
| EDNRB        | -0.150105235 | -4.008305929 | 6.77E-05 | 0.000196909 | no |
| LOC643387    | -0.150039056 | -4.006498021 | 6.83E-05 | 0.000198359 | no |
| SARDH        | 0.149977252  | 4.004809676  | 6.87E-05 | 0.00019972  | no |
| SLC25A1      | -0.149954703 | -4.004193703 | 6.89E-05 | 0.0002002   | no |
| TTC27        | 0.149952758  | 4.004140564  | 6.89E-05 | 0.000200215 | no |
| SNX3         | 0.149950544  | 4.004080093  | 6.89E-05 | 0.000200237 | no |
| MNT          | -0.149944933 | -4.003926817 | 6.90E-05 | 0.000200335 | no |
| PLAC2        | -0.149908473 | -4.002930865 | 6.93E-05 | 0.000201132 | no |
| SLC35D3      | -0.14989917  | -4.002676747 | 6.93E-05 | 0.000201315 | no |
| CAPS         | 0.149894188  | 4.002540647  | 6.94E-05 | 0.000201399 | no |
| NCRNA00032   | -0.149886107 | -4.002319896 | 6.94E-05 | 0.000201554 | no |
| UNK          | -0.149861749 | -4.001654539 | 6.96E-05 | 0.00020208  | no |
| AMDHD2       | 0.149827812  | 4.000727539  | 6.99E-05 | 0.000202826 | no |
| NPDC1        | -0.149772708 | -3.999222359 | 7.03E-05 | 0.000204062 | no |
| CDYL         | -0.149746993 | -3.998519962 | 7.05E-05 | 0.000204625 | no |
| RRP1         | -0.149728479 | -3.998014289 | 7.07E-05 | 0.000205023 | no |
| C18orf10     | 0.149722411  | 3.997848541  | 7.07E-05 | 0.000205134 | no |
| NCRNA00094   | -0.149709943 | -3.997507982 | 7.08E-05 | 0.000205393 | no |
| RIBC2        | 0.149698532  | 3.997196318  | 7.09E-05 | 0.000205628 | no |
| TOP1P1       | 0.149689343  | 3.996945325  | 7.10E-05 | 0.000205812 | no |
| SLC19A3      | 0.149672595  | 3.99648788   | 7.11E-05 | 0.000206171 | no |
| STXBP3       | 0.149661171  | 3.996175852  | 7.12E-05 | 0.000206407 | no |
| CAMP         | 0.149655871  | 3.9960311    | 7.13E-05 | 0.000206501 | no |
| MYO6         | -0.149652531 | -3.995939855 | 7.13E-05 | 0.000206549 | no |
| PRDX3        | 0.149636408  | 3.995499502  | 7.14E-05 | 0.000206895 | no |
| FOXJ1        | 0.149565147  | 3.99355318   | 7.20E-05 | 0.000208533 | no |
| TPPP3        | 0.149563011  | 3.993494839  | 7.20E-05 | 0.000208554 | no |
| RNF20        | -0.14955087  | -3.993163237 | 7.21E-05 | 0.000208809 | no |
| FLJ44606     | 0.14952844   | 3.992550645  | 7.23E-05 | 0.000209247 | no |
| TEKT1        | 0.149527789  | 3.992532875  | 7.23E-05 | 0.000209247 | no |
| ABCA17P      | -0.149527219 | -3.992517285 | 7.23E-05 | 0.000209247 | no |

|          |              |              |          |             |    |
|----------|--------------|--------------|----------|-------------|----|
| AJAP1    | -0.149526425 | -3.992495619 | 7.23E-05 | 0.000209247 | no |
| COMMD10  | 0.149525923  | 3.992481896  | 7.23E-05 | 0.000209247 | no |
| STRA6    | 0.149498599  | 3.991735643  | 7.25E-05 | 0.000209862 | no |
| G3BP1    | 0.149479685  | 3.991219081  | 7.27E-05 | 0.000210279 | no |
| PPIA     | 0.14946917   | 3.990931898  | 7.28E-05 | 0.000210498 | no |
| SPNS2    | -0.149426017 | -3.989753374 | 7.31E-05 | 0.000211493 | no |
| NR2C2    | -0.149363453 | -3.988044749 | 7.37E-05 | 0.000212956 | no |
| HIF3A    | -0.14933388  | -3.987237148 | 7.39E-05 | 0.000213635 | no |
| FGF17    | -0.149331475 | -3.987171449 | 7.39E-05 | 0.000213663 | no |
| TLE3     | -0.149299152 | -3.986288762 | 7.42E-05 | 0.00021441  | no |
| OTOA     | 0.149288133  | 3.985987825  | 7.43E-05 | 0.000214645 | no |
| ZNF385D  | 0.149244261  | 3.984789775  | 7.47E-05 | 0.000215676 | no |
| ZBTB32   | 0.149214647  | 3.983981071  | 7.49E-05 | 0.000216364 | no |
| CA2      | 0.149204538  | 3.983705027  | 7.50E-05 | 0.000216579 | no |
| DCDC1    | 0.149169564  | 3.982749981  | 7.53E-05 | 0.000217401 | no |
| OSBPL9   | 0.149110923  | 3.981148676  | 7.58E-05 | 0.000218807 | no |
| INS-IGF2 | 0.149076742  | 3.980215326  | 7.61E-05 | 0.000219617 | no |
| CACNA1I  | -0.149069135 | -3.98000761  | 7.61E-05 | 0.000219743 | no |
| BRCC3    | 0.149069099  | 3.980006614  | 7.61E-05 | 0.000219743 | no |
| CAMK4    | -0.149067295 | -3.979957361 | 7.62E-05 | 0.000219756 | no |
| CACNA1B  | -0.149059977 | -3.979757548 | 7.62E-05 | 0.000219905 | no |
| TPP2     | -0.149031596 | -3.978982576 | 7.65E-05 | 0.000220576 | no |
| SFRS2IP  | 0.149020038  | 3.978666985  | 7.66E-05 | 0.000220831 | no |
| SNX22    | -0.149013196 | -3.978480164 | 7.66E-05 | 0.000220969 | no |
| GPSM2    | -0.149010453 | -3.978405262 | 7.66E-05 | 0.000221005 | no |
| SMU1     | -0.148990159 | -3.977851131 | 7.68E-05 | 0.000221449 | no |
| APOC1P1  | 0.148990064  | 3.977848553  | 7.68E-05 | 0.000221449 | no |
| EREG     | 0.148984005  | 3.977683108  | 7.69E-05 | 0.000221568 | no |
| CANX     | 0.148973005  | 3.977382755  | 7.70E-05 | 0.00022181  | no |
| TAF6L    | -0.148960872 | -3.977051459 | 7.71E-05 | 0.00022208  | no |
| ELK4     | 0.148944354  | 3.976600466  | 7.72E-05 | 0.000222461 | no |
| NME2     | 0.148939441  | 3.976466305  | 7.73E-05 | 0.000222552 | no |
| MAPRE3   | -0.148933865 | -3.976314065 | 7.73E-05 | 0.000222659 | no |
| HPSE2    | -0.148924412 | -3.976055951 | 7.74E-05 | 0.000222864 | no |
| S100A3   | 0.148910211  | 3.975668214  | 7.75E-05 | 0.000223187 | no |
| C12orf48 | 0.14885164   | 3.974069016  | 7.80E-05 | 0.000224626 | no |
| MRPS10   | 0.14883164   | 3.973522947  | 7.82E-05 | 0.000225099 | no |
| MGC16703 | -0.148748748 | -3.971259816 | 7.89E-05 | 0.000227168 | no |
| GPR27    | -0.148722206 | -3.970535177 | 7.92E-05 | 0.000227812 | no |
| MACROD2  | -0.14865219  | -3.968623644 | 7.98E-05 | 0.000229573 | no |
| TADA2A   | -0.148598929 | -3.96716961  | 8.03E-05 | 0.000230913 | no |
| MAP4K4   | -0.148563552 | -3.966203827 | 8.06E-05 | 0.000231797 | no |
| KCNQ4    | 0.148546625  | 3.965741721  | 8.07E-05 | 0.000232203 | no |
| EFNA2    | -0.148543899 | -3.965667319 | 8.08E-05 | 0.000232241 | no |
| MRO      | -0.148510529 | -3.964756336 | 8.11E-05 | 0.000233077 | no |
| KIAA1107 | -0.148492721 | -3.964270219 | 8.12E-05 | 0.000233509 | no |
| CALM1    | -0.148457092 | -3.963297584 | 8.15E-05 | 0.000234408 | no |
| LEMD3    | -0.14836696  | -3.960837204 | 8.24E-05 | 0.000236749 | no |
| UBL4A    | 0.148339385  | 3.960084479  | 8.26E-05 | 0.000237446 | no |
| CCDC154  | -0.148316038 | -3.959447195 | 8.28E-05 | 0.000238033 | no |
| OAZ3     | 0.148294192  | 3.958850883  | 8.30E-05 | 0.000238571 | no |

|           |              |              |          |             |    |
|-----------|--------------|--------------|----------|-------------|----|
| COPS2     | 0.148293279  | 3.958825939  | 8.30E-05 | 0.000238571 | no |
| H1FX      | -0.148287899 | -3.958679112 | 8.31E-05 | 0.000238681 | no |
| C14orf50  | 0.148282948  | 3.958543961  | 8.31E-05 | 0.000238779 | no |
| CCDC28B   | -0.148270283 | -3.958198257 | 8.33E-05 | 0.000239083 | no |
| C17orf106 | 0.148265545  | 3.958068913  | 8.33E-05 | 0.000239176 | no |
| UBE2R2    | -0.148195755 | -3.956163977 | 8.40E-05 | 0.000241013 | no |
| PFN2      | -0.148190844 | -3.956029943 | 8.40E-05 | 0.000241111 | no |
| ACTL6A    | 0.148185448  | 3.955882651  | 8.41E-05 | 0.000241222 | no |
| CTBP1     | -0.148177413 | -3.955663323 | 8.41E-05 | 0.000241404 | no |
| POLR3F    | -0.148169524 | -3.955447999 | 8.42E-05 | 0.000241583 | no |
| EIF3A     | -0.148136848 | -3.954556123 | 8.45E-05 | 0.000242431 | no |
| RAB3A     | -0.14810838  | -3.953779139 | 8.48E-05 | 0.000243153 | no |
| C20orf3   | 0.148107677  | 3.95375994   | 8.48E-05 | 0.000243153 | no |
| C6orf221  | -0.148102936 | -3.953630541 | 8.48E-05 | 0.000243247 | no |
| FARS2     | 0.14805977   | 3.952452385  | 8.52E-05 | 0.000244387 | no |
| NFKBID    | 0.148045068  | 3.952051119  | 8.54E-05 | 0.000244754 | no |
| ZSCAN1    | -0.148040586 | -3.951928782 | 8.54E-05 | 0.000244841 | no |
| ZNF788    | 0.148028158  | 3.951589598  | 8.55E-05 | 0.000245146 | no |
| DEPDC6    | 0.148025277  | 3.951510967  | 8.56E-05 | 0.00024519  | no |
| ZNF620    | -0.14800399  | -3.950929993 | 8.58E-05 | 0.000245738 | no |
| TRPV1     | -0.147995866 | -3.950708254 | 8.59E-05 | 0.000245926 | no |
| MT1DP     | 0.147982405  | 3.950340882  | 8.60E-05 | 0.000246261 | no |
| RRN3P1    | -0.147927071 | -3.948830705 | 8.65E-05 | 0.00024775  | no |
| LDHAL6B   | 0.147901211  | 3.948124956  | 8.68E-05 | 0.00024843  | no |
| WBSCR28   | 0.147854953  | 3.946862507  | 8.72E-05 | 0.000249679 | no |
| RETSAT    | 0.147849919  | 3.946725121  | 8.73E-05 | 0.000249784 | no |
| MRPS12    | 0.147841675  | 3.946500142  | 8.73E-05 | 0.000249978 | no |
| ALG6      | 0.147811034  | 3.945663945  | 8.76E-05 | 0.000250792 | no |
| ALOX12B   | -0.147809937 | -3.945633996 | 8.76E-05 | 0.000250792 | no |
| ADIPOR2   | -0.147806389 | -3.945537168 | 8.77E-05 | 0.000250856 | no |
| C7orf61   | -0.147800111 | -3.945365853 | 8.77E-05 | 0.000250996 | no |
| OR8J1     | 0.147755016  | 3.944135225  | 8.82E-05 | 0.000252224 | no |
| MARVELD3  | -0.147748524 | -3.943958049 | 8.83E-05 | 0.000252371 | no |
| MRVI1     | -0.147746107 | -3.943892091 | 8.83E-05 | 0.000252403 | no |
| CCDC126   | 0.147730937  | 3.943478108  | 8.84E-05 | 0.000252794 | no |
| KIF20B    | 0.14772416   | 3.943293184  | 8.85E-05 | 0.000252949 | no |
| PBX3      | 0.147719103  | 3.943155188  | 8.85E-05 | 0.000253056 | no |
| TRIM16L   | -0.147678832 | -3.942056239 | 8.89E-05 | 0.000254157 | no |
| CDH19     | 0.147673166  | 3.941901622  | 8.90E-05 | 0.000254281 | no |
| MFS10     | 0.14764251   | 3.94106505   | 8.93E-05 | 0.000255114 | no |
| ELANE     | 0.147632592  | 3.940794408  | 8.94E-05 | 0.00025536  | no |
| MMP8      | 0.147621738  | 3.940498223  | 8.95E-05 | 0.000255632 | no |
| FAM98A    | 0.147584721  | 3.939488119  | 8.99E-05 | 0.000256651 | no |
| INTS4     | -0.147564109 | -3.938925681 | 9.01E-05 | 0.000257204 | no |
| RYK       | 0.147533738  | 3.938096963  | 9.04E-05 | 0.000258037 | no |
| PDE7A     | 0.147493219  | 3.936991328  | 9.08E-05 | 0.000259166 | no |
| GEMIN7    | 0.147482993  | 3.936712295  | 9.09E-05 | 0.000259424 | no |
| TEKT3     | 0.147463688  | 3.936185537  | 9.11E-05 | 0.000259945 | no |
| ERG       | 0.147462247  | 3.93614621   | 9.11E-05 | 0.00025995  | no |
| PGK1      | 0.147444877  | 3.935672281  | 9.13E-05 | 0.000260415 | no |
| KIAA0232  | -0.147436887 | -3.935454255 | 9.14E-05 | 0.00026061  | no |

|          |              |              |             |             |    |
|----------|--------------|--------------|-------------|-------------|----|
| RGS14    | 0.147401788  | 3.934496566  | 9.17E-05    | 0.000261592 | no |
| KCNH4    | -0.147395157 | -3.934315628 | 9.18E-05    | 0.000261747 | no |
| RCVRN    | 0.147386783  | 3.934087147  | 9.19E-05    | 0.000261954 | no |
| IRGQ     | -0.147376064 | -3.933794692 | 9.20E-05    | 0.000262229 | no |
| KALRN    | -0.147368097 | -3.933577318 | 9.21E-05    | 0.000262424 | no |
| WISP2    | 0.147363934  | 3.933463734  | 9.21E-05    | 0.000262509 | no |
| BCLAF1   | -0.147344104 | -3.932922672 | 9.23E-05    | 0.000263051 | no |
| DNAJC15  | 0.147316774  | 3.932176985  | 9.26E-05    | 0.000263811 | no |
| C17orf46 | 0.147315572  | 3.932144187  | 9.26E-05    | 0.000263811 | no |
| C3orf70  | -0.147290544 | -3.931461344 | 9.29E-05    | 0.000264508 | no |
| TSHZ2    | 0.147276848  | 3.931087651  | 9.30E-05    | 0.000264873 | no |
| ACMSD    | 0.147268346  | 3.930855701  | 9.31E-05    | 0.000265086 | no |
| CDK8     | -0.147232647 | -3.929881691 | 9.35E-05    | 0.000266101 | no |
| SMPDL3B  | 0.147221992  | 3.929590997  | 9.36E-05    | 0.000266378 | no |
| ZBTB42   | 0.147215975  | 3.929426838  | 9.36E-05    | 0.000266519 | no |
| C6orf165 | 0.147192369  | 3.928782809  | 9.39E-05    | 0.00026718  | no |
| ATG16L1  | 0.147189896  | 3.928715327  | 9.39E-05    | 0.000267216 | no |
| AHSG     | -0.147169086 | -3.928147578 | 9.41E-05    | 0.000267778 | no |
| UROD     | 0.147168414  | 3.928129258  | 9.41E-05    | 0.000267778 | no |
| LMTK2    | -0.147150795 | -3.927648561 | 9.43E-05    | 0.000268264 | no |
| RHOBTB3  | -0.147119657 | -3.926799058 | 9.46E-05    | 0.000269155 | no |
| FUT8     | 0.147117967  | 3.926752958  | 9.47E-05    | 0.000269157 | no |
| ZNF16    | -0.147117053 | -3.926728028 | 9.47E-05    | 0.000269157 | no |
| IGSF10   | 0.147111549  | 3.926577863  | 9.47E-05    | 0.000269283 | no |
| ACOX3    | -0.147096933 | -3.926179112 | 9.49E-05    | 0.000269682 | no |
| LEO1     | -0.147072346 | -3.925508346 | 9.51E-05    | 0.000270363 | no |
| METTL4   | 0.147071661  | 3.925489683  | 9.51E-05    | 0.000270363 | no |
| ASPDH    | -0.147041056 | -3.924654731 | 9.55E-05    | 0.000271244 | no |
| GCC1     | 0.147037515  | 3.924558132  | 9.55E-05    | 0.000271304 | no |
| RGAG1    | -0.147036265 | -3.924524029 | 9.55E-05    | 0.000271304 | no |
| ZNF808   | 0.147035259  | 3.924496588  | 9.55E-05    | 0.000271304 | no |
| PEBP1    | -0.146982222 | -3.923049729 | 9.61E-05    | 0.000272865 | no |
| TSTA3    | 0.146974618  | 3.922842299  | 9.62E-05    | 0.000273057 | no |
| THSD4    | -0.146951348 | -3.922207499 | 9.64E-05    | 0.000273723 | no |
| PKHD1L1  | 0.146931172  | 3.921657098  | 9.66E-05    | 0.000274297 | no |
| OXSRI    | 0.14692824   | 3.921577127  | 9.67E-05    | 0.000274348 | no |
| ABI1     | -0.146882949 | -3.920341615 | 9.72E-05    | 0.000275689 | no |
| CDNF     | -0.146871886 | -3.92003985  | 9.73E-05    | 0.000275988 | no |
| FAM36A   | -0.146860984 | -3.919742438 | 9.74E-05    | 0.000276282 | no |
| MRPS27   | -0.146849355 | -3.919425218 | 9.75E-05    | 0.0002766   | no |
| EIF3F    | -0.146833004 | -3.918979191 | 9.77E-05    | 0.000277062 | no |
| ATP11B   | 0.14678915   | 3.917782952  | 9.82E-05    | 0.000278371 | no |
| HOXB7    | 0.14670447   | 3.915473136  | 9.91E-05    | 0.000280952 | no |
| RBM45    | 0.146700079  | 3.915353352  | 9.91E-05    | 0.000281049 | no |
| BRE      | 0.146694033  | 3.915188457  | 9.92E-05    | 0.000281198 | no |
| ANKZF1   | -0.146681113 | -3.914836043 | 9.93E-05    | 0.00028156  | no |
| KLRC4    | -0.146676075 | -3.914698624 | 9.94E-05    | 0.000281678 | no |
| PRMT2    | 0.14666651   | 3.914437721  | 9.95E-05    | 0.000281937 | no |
| RNF19A   | 0.146598013  | 3.912569408  | 0.000100267 | 0.00028404  | no |
| PPP1R11  | -0.146594079 | -3.912462121 | 0.00010031  | 0.000284124 | no |
| SKIL     | 0.146555462  | 3.911408837  | 0.000100739 | 0.000285299 | no |

|            |              |              |             |             |    |
|------------|--------------|--------------|-------------|-------------|----|
| ST6GALNAC2 | 0.146509304  | 3.910149906  | 0.000101255 | 0.000286718 | no |
| C17orf42   | 0.146499487  | 3.909882147  | 0.000101364 | 0.000286952 | no |
| PMS2L2     | 0.146499386  | 3.909879397  | 0.000101366 | 0.000286952 | no |
| AQP2       | 0.146485354  | 3.909496688  | 0.000101523 | 0.000287357 | no |
| MIAT       | -0.146473653 | -3.909177564 | 0.000101654 | 0.000287688 | no |
| RERE       | -0.146458597 | -3.908766937 | 0.000101823 | 0.000288126 | no |
| SMG7       | -0.146453893 | -3.908638632 | 0.000101876 | 0.000288236 | no |
| TNFRSF25   | 0.146436518  | 3.908164745  | 0.000102072 | 0.000288749 | no |
| MRPL37     | 0.146429247  | 3.907966462  | 0.000102154 | 0.00028894  | no |
| APLP2      | 0.14642649   | 3.907891261  | 0.000102185 | 0.000288988 | no |
| C6orf48    | -0.146410451 | -3.907453821 | 0.000102366 | 0.00028946  | no |
| ZNF586     | 0.146401595  | 3.9072123    | 0.000102466 | 0.000289702 | no |
| C12orf74   | 0.146388103  | 3.906844321  | 0.000102619 | 0.000290094 | no |
| EFHD2      | 0.146383838  | 3.906728012  | 0.000102667 | 0.00029019  | no |
| RGS7BP     | -0.146382547 | -3.906692805 | 0.000102682 | 0.00029019  | no |
| COG2       | -0.146357466 | -3.906008787 | 0.000102967 | 0.000290954 | no |
| MECP2      | -0.146325197 | -3.905128738 | 0.000103334 | 0.000291951 | no |
| TGM1       | -0.146319383 | -3.904970189 | 0.0001034   | 0.000292098 | no |
| GAS2L1     | -0.146302274 | -3.904503582 | 0.000103596 | 0.000292609 | no |
| C14orf159  | -0.146292104 | -3.904226231 | 0.000103712 | 0.000292897 | no |
| SMAD4      | -0.146282026 | -3.90395139  | 0.000103827 | 0.000293182 | no |
| GRM5       | -0.146275084 | -3.903762078 | 0.000103907 | 0.000293365 | no |
| WDR38      | 0.146191843  | 3.901492018  | 0.000104865 | 0.000296029 | no |
| GUCY2D     | 0.146187624  | 3.901376968  | 0.000104914 | 0.000296088 | no |
| COLEC11    | 0.146187425  | 3.901371559  | 0.000104916 | 0.000296088 | no |
| C21orf33   | -0.146186232 | -3.901339012 | 0.00010493  | 0.000296088 | no |
| ZNF22      | -0.146173578 | -3.900993945 | 0.000105076 | 0.00029646  | no |
| NXPH3      | -0.146153247 | -3.90043952  | 0.000105312 | 0.000297084 | no |
| SMARCD2    | 0.146144205  | 3.900192935  | 0.000105417 | 0.00029731  | no |
| HEXIM2     | -0.146143833 | -3.900182798 | 0.000105422 | 0.00029731  | no |
| VAV3       | 0.146118168  | 3.899482933  | 0.00010572  | 0.00029811  | no |
| RBMX       | -0.146061106 | -3.897926888 | 0.000106387 | 0.000299948 | no |
| C22orf45   | -0.146052947 | -3.897704408 | 0.000106483 | 0.000300176 | no |
| ACAT2      | -0.146047657 | -3.89756016  | 0.000106545 | 0.000300292 | no |
| ZNF45      | 0.146046919  | 3.897540046  | 0.000106553 | 0.000300292 | no |
| MEOX1      | 0.146002152  | 3.896319321  | 0.00010708  | 0.000301734 | no |
| C10orf32   | -0.145975937 | -3.895604488 | 0.000107389 | 0.000302564 | no |
| TLX1NB     | -0.14597455  | -3.895566683 | 0.000107406 | 0.000302568 | no |
| C15orf26   | 0.145955368  | 3.89504362   | 0.000107633 | 0.000303166 | no |
| LEPREL2    | 0.145928128  | 3.894300862  | 0.000107956 | 0.000304029 | no |
| HPCAL4     | -0.145926996 | -3.894269992 | 0.00010797  | 0.000304029 | no |
| CD70       | 0.145909746  | 3.893799641  | 0.000108175 | 0.000304565 | no |
| SYNJ1      | -0.145894375 | -3.893380532 | 0.000108358 | 0.000305038 | no |
| DOCK5      | 0.145886202  | 3.893157663  | 0.000108455 | 0.00030527  | no |
| ZNF513     | -0.145884383 | -3.893108077 | 0.000108477 | 0.000305288 | no |
| KCNH7      | -0.145786592 | -3.890441705 | 0.00010965  | 0.000308547 | no |
| PTDSS2     | -0.145772201 | -3.89004934  | 0.000109824 | 0.000308993 | no |
| MYL6B      | -0.14574445  | -3.889292715 | 0.00011016  | 0.000309894 | no |
| TOE1       | 0.145740858  | 3.889194775  | 0.000110203 | 0.000309949 | no |
| HDAC11     | -0.145740309 | -3.889179811 | 0.00011021  | 0.000309949 | no |
| HMGNA4     | 0.145719353  | 3.888608444  | 0.000110464 | 0.00031062  | no |

|           |              |              |             |             |    |
|-----------|--------------|--------------|-------------|-------------|----|
| FNDC5     | -0.14570618  | -3.888249283 | 0.000110624 | 0.000311027 | no |
| EPM2A     | -0.145686327 | -3.887708019 | 0.000110866 | 0.000311663 | no |
| ATE1      | -0.145678916 | -3.887505951 | 0.000110956 | 0.000311874 | no |
| SGSM3     | -0.145668631 | -3.887225541 | 0.000111081 | 0.000312183 | no |
| PMVK      | -0.145660691 | -3.887009059 | 0.000111178 | 0.000312412 | no |
| GCNT3     | 0.145639872  | 3.88644147   | 0.000111433 | 0.000313084 | no |
| SLAIN1    | -0.145620464 | -3.885912349 | 0.000111671 | 0.000313708 | no |
| FAM154B   | 0.145617519  | 3.885832063  | 0.000111707 | 0.000313766 | no |
| SH3BP4    | -0.145612148 | -3.885685616 | 0.000111773 | 0.000313908 | no |
| SLC12A4   | -0.145599624 | -3.885344169 | 0.000111927 | 0.000314296 | no |
| CTSG      | 0.145594625  | 3.885207894  | 0.000111988 | 0.000314425 | no |
| OR2A4     | 0.145589374  | 3.885064716  | 0.000112053 | 0.000314563 | no |
| MEIS2     | -0.145579907 | -3.884806618 | 0.000112169 | 0.000314847 | no |
| REV3L     | -0.145569272 | -3.884516699 | 0.0001123   | 0.000315171 | no |
| CPEB4     | -0.145562524 | -3.884332726 | 0.000112384 | 0.000315361 | no |
| IFRD1     | 0.14554978   | 3.883985301  | 0.000112541 | 0.000315758 | no |
| THRB      | -0.145538756 | -3.883684753 | 0.000112677 | 0.000316095 | no |
| MAP4K3    | -0.145537539 | -3.883651573 | 0.000112692 | 0.000316095 | no |
| SFRS9     | 0.145532912  | 3.883525427  | 0.00011275  | 0.000316212 | no |
| ITGAD     | 0.145517431  | 3.883103391  | 0.000112941 | 0.000316706 | no |
| ANKRD11   | -0.145501529 | -3.882669868 | 0.000113139 | 0.000317215 | no |
| ANGPTL2   | -0.145451353 | -3.881301976 | 0.000113763 | 0.000318923 | no |
| PRSS21    | 0.145443987  | 3.881101178  | 0.000113855 | 0.000319136 | no |
| EIF1AX    | -0.14542547  | -3.880596375 | 0.000114087 | 0.000319741 | no |
| TRIM67    | -0.145406376 | -3.880075868 | 0.000114326 | 0.000320367 | no |
| TAF15     | -0.145386052 | -3.87952182  | 0.000114581 | 0.000321037 | no |
| CD99      | 0.145384143  | 3.879469769  | 0.000114605 | 0.00032106  | no |
| PIIF      | -0.145368225 | -3.879035843 | 0.000114806 | 0.000321577 | no |
| CTU2      | -0.145354698 | -3.878667103 | 0.000114976 | 0.000322009 | no |
| PIAS3     | 0.145344436  | 3.878387351  | 0.000115106 | 0.000322327 | no |
| GTF2H2C   | 0.145330312  | 3.878002337  | 0.000115284 | 0.000322782 | no |
| CDK9      | -0.145294098 | -3.877015151 | 0.000115743 | 0.000324021 | no |
| VMAC      | 0.145287932  | 3.876847075  | 0.000115821 | 0.000324196 | no |
| CHKA      | -0.145260523 | -3.876099924 | 0.000116169 | 0.000325126 | no |
| C6orf72   | 0.145247779  | 3.875752558  | 0.000116332 | 0.000325535 | no |
| TP53BP2   | -0.145245919 | -3.875701834 | 0.000116355 | 0.000325557 | no |
| KIAA1731  | -0.145243271 | -3.875629677 | 0.000116389 | 0.000325566 | no |
| ZMYND10   | 0.145243136  | 3.875625972  | 0.000116391 | 0.000325566 | no |
| STUB1     | -0.145234671 | -3.875395232 | 0.000116499 | 0.000325823 | no |
| UFSP1     | 0.145229331  | 3.87524967   | 0.000116567 | 0.000325968 | no |
| NGF       | 0.145200085  | 3.874452493  | 0.000116941 | 0.000326969 | no |
| UNC50     | 0.145183547  | 3.874001696  | 0.000117153 | 0.000327517 | no |
| TRAK2     | 0.145182288  | 3.873967358  | 0.000117169 | 0.000327517 | no |
| DARS      | -0.145151317 | -3.873123158 | 0.000117567 | 0.000328584 | no |
| TACR2     | 0.145139728  | 3.872807269  | 0.000117717 | 0.000328956 | no |
| LOC388955 | 0.145117071  | 3.872189708  | 0.000118009 | 0.000329728 | no |
| DEPDC1    | 0.145038536  | 3.870049103  | 0.000119028 | 0.000332528 | no |
| METTL3    | -0.145035577 | -3.869968454 | 0.000119067 | 0.00033259  | no |
| TRIM46    | -0.144992964 | -3.868806997 | 0.000119623 | 0.000334098 | no |
| DNAJC2    | 0.14498275   | 3.86852859   | 0.000119757 | 0.000334426 | no |
| KIF22     | -0.144949911 | -3.867633548 | 0.000120188 | 0.000335583 | no |

|              |              |              |             |             |    |
|--------------|--------------|--------------|-------------|-------------|----|
| ITGA11       | 0.144911978  | 3.866599696  | 0.000120687 | 0.000336931 | no |
| SFXN4        | -0.144885043 | -3.865865588 | 0.000121043 | 0.000337878 | no |
| LOC642826    | -0.144839531 | -3.864625211 | 0.000121647 | 0.000339517 | no |
| ARHGAP19     | -0.144837042 | -3.864557381 | 0.00012168  | 0.000339538 | no |
| DHX33        | -0.144836438 | -3.864540907 | 0.000121688 | 0.000339538 | no |
| LOC100129534 | 0.144833214  | 3.864453045  | 0.000121731 | 0.00033961  | no |
| BDP1         | -0.144767302 | -3.862656719 | 0.000122611 | 0.000342018 | no |
| G6PC3        | 0.144757978  | 3.862402601  | 0.000122736 | 0.000342319 | no |
| CAMK1D       | -0.144743192 | -3.861999655 | 0.000122934 | 0.000342825 | no |
| CSRP1        | 0.144735383  | 3.861786842  | 0.000123039 | 0.00034307  | no |
| CYTH1        | -0.144708639 | -3.861057992 | 0.000123399 | 0.000344027 | no |
| FMOD         | 0.144692709  | 3.860623877  | 0.000123614 | 0.000344552 | no |
| RBM3         | 0.144692125  | 3.860607952  | 0.000123622 | 0.000344552 | no |
| B3GALNT2     | 0.144671441  | 3.860044261  | 0.000123901 | 0.000345284 | no |
| HAUS1        | 0.144660088  | 3.859734885  | 0.000124055 | 0.000345664 | no |
| C8orf51      | 0.144653953  | 3.859567687  | 0.000124138 | 0.000345848 | no |
| FMNL2        | -0.144641318 | -3.859223377 | 0.000124309 | 0.000346278 | no |
| ADAM20       | -0.144638654 | -3.859150776 | 0.000124345 | 0.000346331 | no |
| AARS2        | -0.144609222 | -3.858348717 | 0.000124746 | 0.000347397 | no |
| ACBD3        | 0.144605529  | 3.858248068  | 0.000124796 | 0.00034749  | no |
| SLC22A4      | 0.144586327  | 3.857724809  | 0.000125058 | 0.00034817  | no |
| ADAM11       | -0.144581992 | -3.857606668 | 0.000125117 | 0.000348287 | no |
| KCNC2        | -0.144539945 | -3.856460878 | 0.000125692 | 0.00034984  | no |
| STMN2        | -0.144532819 | -3.856266694 | 0.00012579  | 0.000350024 | no |
| SAA4         | 0.144532613  | 3.856261073  | 0.000125793 | 0.000350024 | no |
| NAB2         | 0.144489773  | 3.85509368   | 0.000126382 | 0.000351615 | no |
| ITIH2        | 0.144479648  | 3.854817795  | 0.000126521 | 0.000351955 | no |
| SDHD         | 0.144469857  | 3.854550975  | 0.000126656 | 0.000352282 | no |
| TMEM132C     | -0.144460541 | -3.854297122 | 0.000126785 | 0.000352586 | no |
| GCKR         | 0.144459426  | 3.854266756  | 0.000126801 | 0.000352586 | no |
| FOXO4        | -0.144423373 | -3.853284339 | 0.0001273   | 0.000353926 | no |
| TET2         | -0.144409459 | -3.852905208 | 0.000127493 | 0.000354414 | no |
| PLEKHG6      | 0.144371422  | 3.851868758  | 0.000128023 | 0.000355838 | no |
| KCNT1        | -0.144352581 | -3.851355364 | 0.000128286 | 0.00035652  | no |
| NACC1        | -0.144329048 | -3.850714139 | 0.000128615 | 0.000357386 | no |
| LOC84989     | -0.144321504 | -3.85050859  | 0.000128721 | 0.000357631 | no |
| OR4F15       | 0.14428738   | 3.849578812  | 0.0001292   | 0.000358913 | no |
| ZNF33B       | -0.144276376 | -3.849278976 | 0.000129355 | 0.000359294 | no |
| H3F3B        | -0.144270227 | -3.849111432 | 0.000129442 | 0.000359485 | no |
| TOX4         | -0.144263363 | -3.848924397 | 0.000129538 | 0.000359705 | no |
| ITIH5        | 0.144244919  | 3.848421867  | 0.000129799 | 0.000360378 | no |
| TLE4         | 0.144224973  | 3.847878399  | 0.000130081 | 0.000361112 | no |
| SENP6        | -0.144223162 | -3.84782907  | 0.000130107 | 0.000361134 | no |
| PRTFDC1      | -0.144213931 | -3.847577557 | 0.000130237 | 0.000361447 | no |
| VPS54        | 0.144193117  | 3.847010463  | 0.000130533 | 0.000362217 | no |
| CX3CL1       | -0.144138721 | -3.845528393 | 0.000131308 | 0.000364318 | no |
| TECPR1       | -0.14413627  | -3.845461609 | 0.000131343 | 0.000364365 | no |
| IL1B         | 0.144134461  | 3.84541233   | 0.000131369 | 0.000364386 | no |
| ACADM        | 0.144115602  | 3.844898506  | 0.000131639 | 0.000365085 | no |
| POLD3        | 0.144102663  | 3.84454598   | 0.000131824 | 0.000365549 | no |
| ANGPT2       | 0.144071102  | 3.843686101  | 0.000132277 | 0.000366755 | no |



|              |              |              |             |             |    |
|--------------|--------------|--------------|-------------|-------------|----|
| CYP2D7P1     | -0.144064088 | -3.843495014 | 0.000132378 | 0.000366985 | no |
| EXOC3        | -0.144046966 | -3.84302854  | 0.000132625 | 0.000367618 | no |
| EPS8L2       | 0.144039785  | 3.842832906  | 0.000132728 | 0.000367855 | no |
| ZNF668       | -0.143994835 | -3.84160828  | 0.000133379 | 0.000369606 | no |
| TUFT1        | 0.143980437  | 3.841216023  | 0.000133588 | 0.000370135 | no |
| METTL8       | 0.143975903  | 3.841092505  | 0.000133653 | 0.000370266 | no |
| STAT5B       | -0.143971522 | -3.840973154 | 0.000133717 | 0.000370392 | no |
| MAPK1        | -0.143945336 | -3.840259762 | 0.000134098 | 0.000371397 | no |
| KIF5B        | -0.143940524 | -3.840128679 | 0.000134168 | 0.00037154  | no |
| PCDP1        | 0.143913593  | 3.839394989  | 0.000134561 | 0.000372578 | no |
| MPPED2       | -0.143903661 | -3.839124416 | 0.000134707 | 0.000372929 | no |
| TAS2R5       | -0.143878469 | -3.838438134 | 0.000135076 | 0.000373899 | no |
| LOC643008    | 0.143833284  | 3.837207194  | 0.00013574  | 0.000375687 | no |
| ZFAND1       | 0.14383046   | 3.837130278  | 0.000135782 | 0.000375738 | no |
| C14orf102    | -0.143829526 | -3.837104814 | 0.000135796 | 0.000375738 | no |
| LOC100216001 | 0.143817436  | 3.836775483  | 0.000135974 | 0.00037618  | no |
| IFNB1        | 0.143788689  | 3.835992357  | 0.000136399 | 0.000377304 | no |
| RINT1        | 0.143785565  | 3.835907273  | 0.000136445 | 0.00037738  | no |
| PRMT8        | -0.143763199 | -3.835297978 | 0.000136777 | 0.000378229 | no |
| MTSS1        | -0.143762339 | -3.835274551 | 0.00013679  | 0.000378229 | no |
| USPL1        | -0.143750486 | -3.834951686 | 0.000136966 | 0.000378664 | no |
| GADD45G      | -0.143701018 | -3.83360414  | 0.000137703 | 0.00038065  | no |
| STOM         | 0.143689538  | 3.833291427  | 0.000137875 | 0.000381073 | no |
| PYG01        | -0.143670635 | -3.832776523 | 0.000138158 | 0.000381803 | no |
| SERAC1       | 0.143662367  | 3.832551308  | 0.000138281 | 0.000382093 | no |
| DNTTIP2      | 0.143655305  | 3.832358929  | 0.000138387 | 0.000382334 | no |
| GLDC         | -0.143642701 | -3.832015604 | 0.000138577 | 0.000382804 | no |
| FLJ42709     | -0.143629086 | -3.831644735 | 0.000138781 | 0.000383317 | no |
| FAM183B      | 0.14360676   | 3.831036609  | 0.000139118 | 0.000384194 | no |
| KAZ          | -0.143567001 | -3.829953621 | 0.000139719 | 0.000385801 | no |
| ZBED5        | -0.143561791 | -3.829811703 | 0.000139798 | 0.000385966 | no |
| DDX43        | 0.143557073  | 3.829683185  | 0.000139869 | 0.000386111 | no |
| DNAJC14      | 0.143553107  | 3.829575154  | 0.000139929 | 0.000386224 | no |
| MOGS         | 0.143541835  | 3.82926812   | 0.0001401   | 0.000386643 | no |
| TMEM14C      | 0.14353682   | 3.829131522  | 0.000140177 | 0.000386801 | no |
| MYH14        | -0.143513435 | -3.828494558 | 0.000140532 | 0.000387729 | no |
| FAM73B       | -0.14349697  | -3.828046087 | 0.000140783 | 0.000388369 | no |
| HSP90AB1     | -0.143482867 | -3.827661966 | 0.000140998 | 0.00038891  | no |
| USP40        | 0.143469104  | 3.827287086  | 0.000141209 | 0.000389437 | no |
| PCDHGC4      | -0.143434075 | -3.82633301  | 0.000141746 | 0.000390864 | no |
| CLCNKA       | 0.143413373  | 3.825769161  | 0.000142064 | 0.000391688 | no |
| C15orf41     | 0.143398507  | 3.825364259  | 0.000142293 | 0.000392265 | no |
| PET112L      | -0.143379445 | -3.82484507  | 0.000142587 | 0.000393022 | no |
| ITK          | 0.143370559  | 3.824603038  | 0.000142724 | 0.000393347 | no |
| TMEM5        | 0.143364057  | 3.824425969  | 0.000142824 | 0.000393357 | no |
| SDPR         | -0.143344909 | -3.823904448 | 0.000143121 | 0.000394333 | no |
| HBXIP        | 0.143300491  | 3.822694695  | 0.00014381  | 0.000396179 | no |
| EIF4A2       | -0.143180158 | -3.819417475 | 0.000145694 | 0.000401314 | no |
| ATG5         | 0.143105463  | 3.817383251  | 0.000146875 | 0.000404513 | no |
| CALML6       | 0.143084901  | 3.816823292  | 0.000147202 | 0.000405357 | no |
| EXOC2        | -0.143048438 | -3.81583033  | 0.000147783 | 0.000406902 | no |

|              |              |              |             |             |    |
|--------------|--------------|--------------|-------------|-------------|----|
| PRKAR1B      | -0.143044921 | -3.815734531 | 0.000147839 | 0.000407001 | no |
| TMEM50B      | 0.143006813  | 3.814696796  | 0.000148449 | 0.000408624 | no |
| C1orf203     | 0.142987748  | 3.814177598  | 0.000148755 | 0.000409395 | no |
| CCDC71       | 0.142986848  | 3.814153109  | 0.000148777 | 0.000409395 | no |
| CALM3        | -0.142975037 | -3.813831468 | 0.000148959 | 0.000409862 | no |
| MGC15885     | 0.142952017  | 3.813204613  | 0.000149333 | 0.000410826 | no |
| NCL          | -0.142928281 | -3.812558252 | 0.000149713 | 0.000411824 | no |
| DMXL2        | -0.14290352  | -3.811883982 | 0.000150114 | 0.000412869 | no |
| C1orf183     | -0.14289216  | -3.811574656 | 0.000150298 | 0.00041332  | no |
| TRMT5        | -0.14288102  | -3.811271315 | 0.000150479 | 0.000413761 | no |
| ARHGEF11     | -0.142863073 | -3.810782611 | 0.000150771 | 0.000414506 | no |
| HHLA3        | 0.142849248  | 3.810406149  | 0.000150996 | 0.000415069 | no |
| KCNAB3       | -0.142810773 | -3.809358485 | 0.000151624 | 0.000416738 | no |
| NCRNA00087   | -0.142797783 | -3.809004758 | 0.000151836 | 0.000417266 | no |
| SCAND2       | -0.142791453 | -3.808832415 | 0.00015194  | 0.000417494 | no |
| PXDNL        | 0.142788235  | 3.808744789  | 0.000151993 | 0.000417582 | no |
| IER3IP1      | 0.14277891   | 3.808490859  | 0.000152146 | 0.000417946 | no |
| C14orf129    | 0.142738252  | 3.80738381   | 0.000152814 | 0.000419725 | no |
| DYDC1        | 0.142734817  | 3.807290266  | 0.000152871 | 0.000419823 | no |
| LOC202781    | -0.142733215 | -3.807246647 | 0.000152897 | 0.000419839 | no |
| MAP3K11      | 0.142690924  | 3.806095124  | 0.000153596 | 0.0004217   | no |
| IFT122       | 0.14266472   | 3.805381649  | 0.00015403  | 0.000422835 | no |
| C4orf47      | 0.142656772  | 3.805165249  | 0.000154162 | 0.00042314  | no |
| GABARAPL2    | -0.142639487 | -3.804694608 | 0.000154449 | 0.000423871 | no |
| PRRC1        | 0.142617936  | 3.804107848  | 0.000154808 | 0.000424799 | no |
| ASAH2B       | -0.142593849 | -3.80345202  | 0.000155211 | 0.000425844 | no |
| ERCC3        | -0.142554038 | -3.802368111 | 0.000155877 | 0.000427575 | no |
| C1orf74      | 0.142553677  | 3.802358281  | 0.000155883 | 0.000427575 | no |
| DKK2         | 0.142546339  | 3.802158497  | 0.000156007 | 0.000427855 | no |
| SNAPC3       | -0.142542002 | -3.802040404 | 0.00015608  | 0.000427996 | no |
| CBX7         | -0.142536258 | -3.801884019 | 0.000156176 | 0.000428203 | no |
| C20orf111    | 0.142533856  | 3.801818612  | 0.000156217 | 0.000428256 | no |
| ANKS1B       | -0.142528895 | -3.801683564 | 0.0001563   | 0.000428426 | no |
| ZNF541       | 0.14251991   | 3.801438926  | 0.000156451 | 0.000428783 | no |
| PKN1         | -0.142511563 | -3.801211681 | 0.000156592 | 0.00042911  | no |
| ZNF98        | -0.142486736 | -3.800535742 | 0.000157011 | 0.0004302   | no |
| BCAP29       | 0.142477718  | 3.800290214  | 0.000157163 | 0.00043056  | no |
| SDK1         | 0.142475947  | 3.800242001  | 0.000157193 | 0.000430583 | no |
| KAT2B        | -0.142463117 | -3.799892695 | 0.000157411 | 0.00043112  | no |
| SPRYD3       | -0.142418186 | -3.798669443 | 0.000158173 | 0.000433151 | no |
| DIRAS1       | -0.142390927 | -3.797927333 | 0.000158638 | 0.000434364 | no |
| STXBP5L      | -0.142375219 | -3.79749969  | 0.000158906 | 0.000435039 | no |
| LOC145845    | 0.142355987  | 3.796976103  | 0.000159235 | 0.000435881 | no |
| PEMT         | -0.142315941 | -3.795885897 | 0.000159922 | 0.000437703 | no |
| LCAT         | -0.142306909 | -3.795640012 | 0.000160078 | 0.000438069 | no |
| WFDC8        | 0.142302575  | 3.795522027  | 0.000160152 | 0.000438214 | no |
| PDCL3        | 0.142294782  | 3.795309894  | 0.000160287 | 0.000438521 | no |
| CSMD2        | -0.14227322  | -3.794722901 | 0.000160658 | 0.000439479 | no |
| C1orf35      | -0.142264164 | -3.79447636  | 0.000160815 | 0.000439848 | no |
| LOC100268168 | -0.142257533 | -3.794295846 | 0.00016093  | 0.000440102 | no |
| GDE1         | 0.142250734  | 3.794110745  | 0.000161047 | 0.000440364 | no |

|            |              |              |             |             |    |
|------------|--------------|--------------|-------------|-------------|----|
| UBLCP1     | 0.142240588  | 3.793834568  | 0.000161223 | 0.000440785 | no |
| SEPX1      | 0.142226974  | 3.793463941  | 0.000161459 | 0.000441371 | no |
| KCTD4      | -0.14221809  | -3.793222104 | 0.000161613 | 0.000441732 | no |
| RNASEH2C   | -0.142202622 | -3.792801038 | 0.000161882 | 0.000442407 | no |
| SYMPK      | -0.142193377 | -3.792549345 | 0.000162043 | 0.000442787 | no |
| LOC440944  | -0.14219026  | -3.792464492 | 0.000162097 | 0.000442875 | no |
| ADD3       | -0.14218313  | -3.792270417 | 0.000162221 | 0.000443155 | no |
| C20orf152  | -0.142175004 | -3.792049199 | 0.000162363 | 0.000443482 | no |
| BEST4      | 0.142166726  | 3.791823858  | 0.000162507 | 0.000443816 | no |
| C16orf72   | 0.14215817   | 3.791590947  | 0.000162657 | 0.000444164 | no |
| LOC158696  | -0.142134159 | -3.790937324 | 0.000163077 | 0.000445251 | no |
| CDH6       | 0.142130793  | 3.790845702  | 0.000163136 | 0.000445352 | no |
| GJA9       | 0.142125528  | 3.790702375  | 0.000163228 | 0.000445544 | no |
| PHKA2      | 0.142108061  | 3.790226916  | 0.000163534 | 0.00044632  | no |
| TRIM2      | -0.142081683 | -3.789508867 | 0.000163998 | 0.000447525 | no |
| PRH2       | -0.14207223  | -3.789251548 | 0.000164165 | 0.000447919 | no |
| NSMCE2     | 0.142067855  | 3.789132466  | 0.000164242 | 0.000448069 | no |
| ATP2B3     | -0.142042601 | -3.788445044 | 0.000164687 | 0.000449224 | no |
| GABARAPL1  | -0.142035136 | -3.788241845 | 0.000164819 | 0.000449524 | no |
| TAS1R1     | 0.142019658  | 3.787820512  | 0.000165093 | 0.00045021  | no |
| MSRA       | 0.142016546  | 3.787735804  | 0.000165149 | 0.0004503   | no |
| DDR1       | -0.142012604 | -3.787628523 | 0.000165218 | 0.00045043  | no |
| NCRNA00086 | -0.141998081 | -3.787233211 | 0.000165476 | 0.000451071 | no |
| TUBB4      | -0.141994439 | -3.787134073 | 0.000165541 | 0.000451187 | no |
| FASTKD2    | 0.141973073  | 3.786552501  | 0.000165921 | 0.000452161 | no |
| SPINLW1    | 0.141971682  | 3.786514629  | 0.000165945 | 0.000452168 | no |
| C5orf28    | 0.141954367  | 3.786043309  | 0.000166254 | 0.000452947 | no |
| ALOXE3     | -0.141952391 | -3.785989542 | 0.000166289 | 0.000452963 | no |
| CCDC144A   | -0.141951533 | -3.785966194 | 0.000166304 | 0.000452963 | no |
| B3GNT7     | 0.141929631  | 3.785370026  | 0.000166696 | 0.000453967 | no |
| FAM23A     | 0.141910751  | 3.784856145  | 0.000167033 | 0.000454826 | no |
| PHACTR4    | 0.14189904   | 3.784537384  | 0.000167243 | 0.000455336 | no |
| ZNF692     | -0.141827766 | -3.782597421 | 0.000168526 | 0.000458766 | no |
| TXN2       | -0.141810901 | -3.782138394 | 0.000168831 | 0.000459534 | no |
| FAM116A    | 0.141790195  | 3.781574818  | 0.000169206 | 0.000460493 | no |
| WDR13      | -0.141782816 | -3.781373993 | 0.00016934  | 0.000460795 | no |
| OR5K2      | -0.141771807 | -3.781074348 | 0.000169539 | 0.000461277 | no |
| CTNNA3     | -0.141769195 | -3.781003252 | 0.000169587 | 0.000461344 | no |
| C6orf154   | -0.141761957 | -3.780806265 | 0.000169718 | 0.000461639 | no |
| FGF13      | -0.141758933 | -3.780723962 | 0.000169773 | 0.000461727 | no |
| TAF10      | 0.141733532  | 3.780032627  | 0.000170236 | 0.000462923 | no |
| GBA2       | -0.141703531 | -3.779216095 | 0.000170784 | 0.00046435  | no |
| LTB4R2     | 0.141697736  | 3.779058377  | 0.00017089  | 0.000464576 | no |
| RTDR1      | 0.141684122  | 3.778687871  | 0.000171139 | 0.000465191 | no |
| PLCH2      | -0.141657292 | -3.777957667 | 0.000171631 | 0.000466466 | no |
| CHADL      | -0.1416189   | -3.776912807 | 0.000172338 | 0.000468324 | no |
| TSR2       | -0.141603585 | -3.776495982 | 0.000172621 | 0.000469029 | no |
| GLTSCR2    | -0.141589678 | -3.776117508 | 0.000172878 | 0.000469664 | no |
| LOC493754  | 0.141584224  | 3.775969074  | 0.000172979 | 0.000469876 | no |
| THAP2      | -0.14157234  | -3.775645658 | 0.000173199 | 0.00047041  | no |
| RAB11FIP2  | -0.141533989 | -3.774601961 | 0.000173911 | 0.000472281 | no |

|          |              |              |             |             |    |
|----------|--------------|--------------|-------------|-------------|----|
| ZDHHC6   | 0.141521698  | 3.77426746   | 0.00017414  | 0.000472838 | no |
| AKAP14   | 0.141456716  | 3.772499044  | 0.000175354 | 0.000476021 | no |
| OR51E2   | 0.141456451  | 3.772491837  | 0.000175359 | 0.000476021 | no |
| G6PC     | -0.141448531 | -3.772276313 | 0.000175507 | 0.00047636  | no |
| EN1      | 0.141422662  | 3.771572327  | 0.000175993 | 0.000477615 | no |
| LRRC7    | -0.141402328 | -3.771018982 | 0.000176376 | 0.00047859  | no |
| DLL4     | 0.141400238  | 3.770962099  | 0.000176416 | 0.000478633 | no |
| GGH      | 0.141394736  | 3.770812389  | 0.000176519 | 0.00047885  | no |
| UBL7     | -0.141391013 | -3.770711073 | 0.00017659  | 0.000478976 | no |
| EEFSEC   | -0.141383998 | -3.770520181 | 0.000176722 | 0.000479271 | no |
| SLC5A3   | 0.141355507  | 3.769744855  | 0.000177261 | 0.000480668 | no |
| GMPS     | 0.141350062  | 3.769596688  | 0.000177364 | 0.000480883 | no |
| DDX20    | 0.141341948  | 3.769375883  | 0.000177518 | 0.000481235 | no |
| GPR113   | -0.141314793 | -3.76863695  | 0.000178033 | 0.000482569 | no |
| GRM1     | -0.141282679 | -3.767763065 | 0.000178645 | 0.00048415  | no |
| KIN      | -0.141281656 | -3.767735248 | 0.000178665 | 0.00048415  | no |
| PRPF8    | -0.141257445 | -3.767076416 | 0.000179127 | 0.000485338 | no |
| FGF14    | -0.141246084 | -3.766767282 | 0.000179344 | 0.000485862 | no |
| DGKG     | -0.141218901 | -3.766027619 | 0.000179866 | 0.000487208 | no |
| SIRT4    | -0.141204871 | -3.765645833 | 0.000180135 | 0.000487831 | no |
| CLPX     | -0.141204419 | -3.765633536 | 0.000180144 | 0.000487831 | no |
| STK38L   | 0.141199714  | 3.765505531  | 0.000180234 | 0.000488011 | no |
| NSUN3    | 0.141193316  | 3.765331439  | 0.000180357 | 0.000488279 | no |
| MTMR4    | -0.141169473 | -3.764682665 | 0.000180817 | 0.000489457 | no |
| CCDC85A  | -0.141138473 | -3.763839148 | 0.000181416 | 0.000491013 | no |
| IK       | -0.14113487  | -3.763741126 | 0.000181486 | 0.000491136 | no |
| NAB1     | -0.14112293  | -3.763416224 | 0.000181717 | 0.000491696 | no |
| CPSF1    | -0.141107613 | -3.762999452 | 0.000182014 | 0.000492434 | no |
| SCMH1    | 0.141100883  | 3.76281634   | 0.000182145 | 0.000492722 | no |
| ZBTB8A   | -0.141095223 | -3.76266235  | 0.000182255 | 0.000492954 | no |
| C9orf171 | 0.141083738  | 3.762349847  | 0.000182478 | 0.000493492 | no |
| FRAT1    | -0.141081625 | -3.762292362 | 0.000182519 | 0.000493496 | no |
| LMCD1    | 0.141081155  | 3.762279566  | 0.000182528 | 0.000493496 | no |
| RAPGEF3  | -0.141059207 | -3.761682373 | 0.000182956 | 0.000494586 | no |
| MBOAT7   | 0.141056014  | 3.761595492  | 0.000183018 | 0.000494688 | no |
| ELF5     | 0.14103487   | 3.761020206  | 0.000183432 | 0.000495738 | no |
| TTC23    | 0.141028804  | 3.76085515   | 0.00018355  | 0.000495993 | no |
| KIAA1586 | -0.140988783 | -3.759766258 | 0.000184335 | 0.000498047 | no |
| NTNG1    | 0.140962691  | 3.759056349  | 0.000184848 | 0.000499367 | no |
| RFPL1S   | -0.140948635 | -3.758673908 | 0.000185125 | 0.000500048 | no |
| BCO2     | 0.140938941  | 3.758410162  | 0.000185317 | 0.000500498 | no |
| EFHC1    | 0.140921991  | 3.757949019  | 0.000185651 | 0.000501336 | no |
| CACNA2D3 | -0.140919403 | -3.757878602 | 0.000185703 | 0.000501367 | no |
| PA2G4P4  | 0.140918891  | 3.75786467   | 0.000185713 | 0.000501367 | no |
| OR4A15   | 0.140912347  | 3.757686617  | 0.000185842 | 0.00050165  | no |
| CBFB     | 0.140906789  | 3.757535408  | 0.000185952 | 0.00050188  | no |
| SPAG7    | -0.140902718 | -3.757424637 | 0.000186033 | 0.000502031 | no |
| CAMTA2   | -0.140893605 | -3.757176708 | 0.000186214 | 0.000502451 | no |
| PGAP1    | -0.140890191 | -3.757083831 | 0.000186281 | 0.000502567 | no |
| NDST4    | -0.140860382 | -3.756272836 | 0.000186874 | 0.000504098 | no |
| C1orf43  | 0.140840929  | 3.755743581  | 0.000187261 | 0.000505076 | no |

|           |              |              |             |             |    |
|-----------|--------------|--------------|-------------|-------------|----|
| HOXB2     | 0.140834997  | 3.755582191  | 0.000187379 | 0.000505327 | no |
| STXBP6    | -0.140811615 | -3.754946052 | 0.000187846 | 0.000506519 | no |
| ARHGEF10L | -0.140785022 | -3.754222573 | 0.000188379 | 0.000507887 | no |
| ESYT2     | 0.140779814  | 3.75408089   | 0.000188483 | 0.000508101 | no |
| PDGFA     | 0.14077654   | 3.753991815  | 0.000188549 | 0.00050821  | no |
| FAM113A   | -0.140765504 | -3.753691573 | 0.000188771 | 0.00050874  | no |
| ZNF428    | -0.140757539 | -3.753474898 | 0.000188931 | 0.000509103 | no |
| ABI3BP    | 0.140719735  | 3.752446442  | 0.000189692 | 0.000511087 | no |
| POR       | 0.140714963  | 3.752316608  | 0.000189789 | 0.000511279 | no |
| CHD4      | -0.140695539 | -3.751788194 | 0.000190181 | 0.000512268 | no |
| BTBD12    | -0.140684512 | -3.751488201 | 0.000190404 | 0.000512801 | no |
| CRLF2     | 0.140663981  | 3.750929663  | 0.000190821 | 0.000513853 | no |
| C1QTNF9B  | 0.14058196   | 3.748698398  | 0.000192492 | 0.000518285 | no |
| NEURL     | -0.140567467 | -3.748304145 | 0.000192789 | 0.000519015 | no |
| TRMT1     | -0.140543021 | -3.747639157 | 0.00019329  | 0.000520296 | no |
| WDTC1     | 0.140499499  | 3.746455239  | 0.000194186 | 0.000522637 | no |
| GPR107    | 0.140496053  | 3.746361508  | 0.000194257 | 0.000522759 | no |
| WBP11     | -0.140491718 | -3.746243578 | 0.000194347 | 0.00052293  | no |
| NEDD9     | 0.140489408  | 3.74618075   | 0.000194394 | 0.000522989 | no |
| SEMA3D    | -0.140487844 | -3.746138196 | 0.000194427 | 0.000523003 | no |
| LOC149837 | 0.140486655  | 3.746105852  | 0.000194451 | 0.000523003 | no |
| CRABP2    | 0.140481429  | 3.745963687  | 0.000194559 | 0.000523224 | no |
| FN3KRP    | -0.140412399 | -3.744085982 | 0.000195991 | 0.000527003 | no |
| MAPK9     | -0.14040867  | -3.743984535 | 0.000196068 | 0.000527142 | no |
| RAB26     | -0.140406429 | -3.743923571 | 0.000196115 | 0.000527197 | no |
| TPRN      | -0.140387754 | -3.743415605 | 0.000196504 | 0.000528173 | no |
| SH3BP5L   | -0.140343384 | -3.742208701 | 0.000197432 | 0.000530596 | no |
| GDPD2     | 0.140322403  | 3.741638012  | 0.000197872 | 0.000531708 | no |
| C12orf61  | 0.140315984  | 3.74146342   | 0.000198007 | 0.000532    | no |
| POC5      | 0.140312951  | 3.74138092   | 0.00019807  | 0.0005321   | no |
| ERGIC3    | 0.14030053   | 3.741043081  | 0.000198331 | 0.000532731 | no |
| FDPS      | -0.140289086 | -3.740731787 | 0.000198572 | 0.000533282 | no |
| PDZD7     | -0.140288278 | -3.740709816 | 0.000198589 | 0.000533282 | no |
| RPH3A     | -0.140278928 | -3.740455493 | 0.000198787 | 0.00053374  | no |
| MTF1      | 0.140275645  | 3.740366213  | 0.000198856 | 0.000533855 | no |
| SGK494    | -0.140256285 | -3.73983963  | 0.000199265 | 0.000534882 | no |
| GK5       | -0.140232943 | -3.739204728 | 0.000199758 | 0.000536136 | no |
| SPINK8    | 0.140216727  | 3.738763668  | 0.000200102 | 0.000536988 | no |
| MRPS18C   | 0.140207669  | 3.738517307  | 0.000200294 | 0.000537432 | no |
| FNTB      | 0.140203749  | 3.738410693  | 0.000200378 | 0.000537585 | no |
| TTC16     | 0.140167844  | 3.737434123  | 0.000201142 | 0.000539563 | no |
| UNC13C    | -0.140165158 | -3.737361072 | 0.000201199 | 0.000539645 | no |
| KPNA2     | 0.14014763   | 3.736884351  | 0.000201573 | 0.000540577 | no |
| RWDD2B    | 0.140141116  | 3.736707167  | 0.000201713 | 0.000540879 | no |
| FUT6      | -0.140128327 | -3.736359329 | 0.000201986 | 0.00054154  | no |
| STMN1     | -0.140111925 | -3.735913231 | 0.000202337 | 0.00054241  | no |
| MYADML2   | -0.140090189 | -3.735322082 | 0.000202804 | 0.000543589 | no |
| GCOM1     | 0.140055004  | 3.73436515   | 0.000203561 | 0.000545546 | no |
| KCNB2     | -0.140050833 | -3.734251699 | 0.000203651 | 0.000545655 | no |
| NT5C1A    | -0.140050623 | -3.734245998 | 0.000203656 | 0.000545655 | no |
| ERGIC2    | 0.140045758  | 3.734113661  | 0.000203761 | 0.000545864 | no |

|           |              |              |             |             |    |
|-----------|--------------|--------------|-------------|-------------|----|
| PRDX2     | -0.140010449 | -3.733153393 | 0.000204524 | 0.000547836 | no |
| ASPSCR1   | -0.139994953 | -3.73273194  | 0.00020486  | 0.000548663 | no |
| HADHB     | -0.139989492 | -3.732583437 | 0.000204978 | 0.000548908 | no |
| CLDN4     | 0.139969812  | 3.732048203  | 0.000205406 | 0.00054998  | no |
| C7orf63   | 0.13995115   | 3.731540669  | 0.000205812 | 0.000550994 | no |
| IL9       | -0.139946313 | -3.731409138 | 0.000205918 | 0.000551204 | no |
| UBE2W     | 0.139932631  | 3.731037043  | 0.000206216 | 0.000551929 | no |
| MED12     | -0.139921683 | -3.7307393   | 0.000206455 | 0.000552496 | no |
| C5orf49   | 0.139916563  | 3.730600058  | 0.000206567 | 0.000552722 | no |
| EHHADH    | 0.139911881  | 3.730472737  | 0.000206669 | 0.000552923 | no |
| LOC729156 | 0.139841641  | 3.72856257   | 0.000208211 | 0.000556973 | no |
| NOX01     | -0.139758688 | -3.726306727 | 0.000210045 | 0.000561806 | no |
| MKRN2     | -0.139754831 | -3.72620183  | 0.000210131 | 0.000561961 | no |
| COBLL1    | 0.139725663  | 3.725408658  | 0.00021078  | 0.000563622 | no |
| GP6       | -0.139709515 | -3.724969549 | 0.00021114  | 0.000564443 | no |
| SPRY4     | 0.139708867  | 3.724951921  | 0.000211154 | 0.000564443 | no |
| SOX3      | -0.139708136 | -3.724932055 | 0.00021117  | 0.000564443 | no |
| RBM4      | -0.13970264  | -3.724782595 | 0.000211293 | 0.000564696 | no |
| GAS2L3    | 0.13967169   | 3.72394098   | 0.000211985 | 0.000566471 | no |
| NCBP2     | -0.139664227 | -3.723738036 | 0.000212152 | 0.000566803 | no |
| ANKRD42   | 0.139663634  | 3.723721917  | 0.000212166 | 0.000566803 | no |
| ATP6AP1   | 0.13965281   | 3.723427598  | 0.000212408 | 0.000567377 | no |
| GALNT14   | -0.139649791 | -3.723345493 | 0.000212476 | 0.000567483 | no |
| GDF5      | 0.139645723  | 3.723234872  | 0.000212568 | 0.000567652 | no |
| UBE2D1    | 0.139596781  | 3.721904045  | 0.000213669 | 0.000570518 | no |
| PPHLN1    | 0.139541837  | 3.720410038  | 0.000214912 | 0.000573762 | no |
| YY1       | 0.139512672  | 3.719617025  | 0.000215575 | 0.000575455 | no |
| SCN8A     | -0.139503456 | -3.719366436 | 0.000215785 | 0.000575938 | no |
| GOLGA2B   | 0.13950112   | 3.719302917  | 0.000215838 | 0.000576004 | no |
| IFT140    | -0.139481019 | -3.718756369 | 0.000216296 | 0.000577151 | no |
| BCKDHA    | -0.139469795 | -3.718451185 | 0.000216552 | 0.000577759 | no |
| LONP1     | -0.139463706 | -3.718285602 | 0.000216692 | 0.000577983 | no |
| KDM6B     | -0.139463625 | -3.718283423 | 0.000216693 | 0.000577983 | no |
| ZMYND17   | -0.139455758 | -3.718069514 | 0.000216873 | 0.000578386 | no |
| HADHA     | -0.139405356 | -3.716699075 | 0.00021803  | 0.000581393 | no |
| DND1      | -0.139398022 | -3.716499691 | 0.000218198 | 0.000581766 | no |
| KCNAB1    | -0.139368412 | -3.715694613 | 0.000218881 | 0.000583508 | no |
| DNAJB9    | 0.139338729  | 3.714887553  | 0.000219567 | 0.000585246 | no |
| STON2     | -0.139337709 | -3.714859841 | 0.00021959  | 0.000585246 | no |
| LY6K      | -0.13932896  | -3.714621948 | 0.000219793 | 0.000585709 | no |
| DMRTC1    | -0.139319611 | -3.714367779 | 0.00022001  | 0.000586209 | no |
| GLI3      | 0.139301815  | 3.713883921  | 0.000220423 | 0.000587232 | no |
| PRKY      | 0.139293176  | 3.713649044  | 0.000220623 | 0.000587689 | no |
| SH3BP5    | 0.139280277  | 3.713298355  | 0.000220923 | 0.000588411 | no |
| ERCC5     | -0.139277934 | -3.71323464  | 0.000220978 | 0.000588479 | no |
| PTH1R     | -0.13927486  | -3.713151058 | 0.00022105  | 0.000588592 | no |
| ATOH7     | -0.139271962 | -3.713072285 | 0.000221117 | 0.000588694 | no |
| MLXIPL    | 0.139221275  | 3.71169422   | 0.000222301 | 0.000591737 | no |
| KIAA1109  | -0.139220524 | -3.711673806 | 0.000222319 | 0.000591737 | no |
| CAPNS2    | 0.139212505  | 3.711455795  | 0.000222506 | 0.00059216  | no |
| XIRP2     | 0.139205793  | 3.71127331   | 0.000222664 | 0.0005925   | no |

|              |              |              |             |             |    |
|--------------|--------------|--------------|-------------|-------------|----|
| F7           | -0.139190236 | -3.710850363 | 0.000223029 | 0.000593394 | no |
| NRF1         | -0.139182573 | -3.710642031 | 0.000223209 | 0.000593795 | no |
| GPR1         | 0.139179947  | 3.710570621  | 0.000223271 | 0.000593881 | no |
| ST3GAL5      | -0.139168287 | -3.710253634 | 0.000223545 | 0.000594466 | no |
| NAP1L4       | -0.139168089 | -3.710248258 | 0.00022355  | 0.000594466 | no |
| PLCL1        | -0.139132899 | -3.709291563 | 0.000224379 | 0.000596595 | no |
| PIGY         | 0.139124698  | 3.709068584  | 0.000224573 | 0.000597031 | no |
| TMX4         | 0.139102424  | 3.708463051  | 0.0002251   | 0.000598354 | no |
| DKFZp761E198 | 0.139094361  | 3.708243849  | 0.000225292 | 0.000598783 | no |
| MED13L       | -0.139087048 | -3.708045035 | 0.000225465 | 0.000599166 | no |
| CACNG1       | -0.139076493 | -3.707758105 | 0.000225716 | 0.000599753 | no |
| DUSP4        | 0.139066813  | 3.707494955  | 0.000225946 | 0.000600285 | no |
| DLGAP2       | -0.139042103 | -3.706823184 | 0.000226534 | 0.000601769 | no |
| PSMB4        | 0.139033708  | 3.706594961  | 0.000226734 | 0.000602221 | no |
| C22orf32     | -0.139010825 | -3.705972883 | 0.00022728  | 0.000603593 | no |
| TYSND1       | -0.139003144 | -3.705764089 | 0.000227464 | 0.000604002 | no |
| PAPPA        | 0.13899219   | 3.705466311  | 0.000227726 | 0.000604619 | no |
| FGF1         | 0.138947196  | 3.70424318   | 0.000228806 | 0.000607407 | no |
| DMP1         | 0.138940431  | 3.704059276  | 0.000228969 | 0.000607759 | no |
| SLC45A1      | -0.13892846  | -3.703733852 | 0.000229258 | 0.000608444 | no |
| ZFYVE16      | -0.138896499 | -3.702865032 | 0.000230029 | 0.000610412 | no |
| C20orf20     | 0.138873839  | 3.702249059  | 0.000230578 | 0.000611787 | no |
| PAX6         | -0.138840373 | -3.701339332 | 0.00023139  | 0.000613862 | no |
| LNPEP        | 0.13881968   | 3.700776846  | 0.000231893 | 0.000615117 | no |
| CLTB         | -0.138816928 | -3.700702032 | 0.000231961 | 0.000615214 | no |
| SLC02A1      | 0.138774171  | 3.699539807  | 0.000233005 | 0.000617902 | no |
| URGCP        | -0.138766833 | -3.699340333 | 0.000233184 | 0.000618298 | no |
| NUCB2        | 0.138759704  | 3.699146558  | 0.000233359 | 0.000618679 | no |
| YKT6         | 0.138742434  | 3.69867711   | 0.000233782 | 0.000619721 | no |
| ABCC4        | 0.138739479  | 3.698596806  | 0.000233855 | 0.000619832 | no |
| PCDHB10      | -0.138715419 | -3.697942803 | 0.000234446 | 0.000621318 | no |
| ADSSL1       | 0.138703542  | 3.697619973  | 0.000234739 | 0.000621973 | no |
| LOC388692    | 0.138702894  | 3.697602358  | 0.000234755 | 0.000621973 | no |
| HTT          | -0.138686496 | -3.697156652 | 0.000235159 | 0.000622963 | no |
| TIPARP       | 0.138670748  | 3.696728599  | 0.000235548 | 0.000623911 | no |
| UHRF2        | 0.138648633  | 3.696127486  | 0.000236096 | 0.000625279 | no |
| JUB          | 0.138629625  | 3.695610846  | 0.000236567 | 0.000626445 | no |
| FEM1B        | -0.138525125 | -3.692770546 | 0.000239174 | 0.000633266 | no |
| OVCA2        | 0.138497936  | 3.69203157   | 0.000239857 | 0.000634989 | no |
| RNASE10      | 0.138496712  | 3.691998292  | 0.000239888 | 0.000634989 | no |
| RING1        | -0.138495456 | -3.69196417  | 0.000239919 | 0.00063499  | no |
| PGLYRP1      | 0.138492677  | 3.691888644  | 0.000239989 | 0.000635068 | no |
| TK1          | 0.138491779  | 3.691864217  | 0.000240012 | 0.000635068 | no |
| C9orf172     | -0.13848919  | -3.691793864 | 0.000240077 | 0.000635157 | no |
| ATP6V1F      | 0.138466227  | 3.691169762  | 0.000240655 | 0.000636605 | no |
| C6orf81      | -0.138442956 | -3.690537288 | 0.000241243 | 0.000638076 | no |
| SMURF1       | 0.13842401   | 3.690022364  | 0.000241722 | 0.00063926  | no |
| CYP7A1       | 0.138414423  | 3.689761812  | 0.000241965 | 0.000639819 | no |
| TIPIN        | 0.138401933  | 3.689422364  | 0.000242282 | 0.000640537 | no |
| NAGPA        | 0.13840081   | 3.689391837  | 0.000242311 | 0.000640537 | no |
| GATSL2       | -0.138399973 | -3.689369095 | 0.000242332 | 0.000640537 | no |

|          |              |              |             |             |    |
|----------|--------------|--------------|-------------|-------------|----|
| PANX2    | -0.138386356 | -3.688998999 | 0.000242678 | 0.000641367 | no |
| GALE     | 0.138381774  | 3.688874466  | 0.000242794 | 0.000641537 | no |
| ZBTB17   | -0.138381326 | -3.68886229  | 0.000242806 | 0.000641537 | no |
| TFPI2    | 0.138362371  | 3.688347141  | 0.000243288 | 0.000642728 | no |
| KIAA0513 | -0.138358383 | -3.688238772 | 0.00024339  | 0.000642913 | no |
| ZNF300   | -0.138330394 | -3.687478096 | 0.000244104 | 0.000644716 | no |
| CCDC30   | 0.138324915  | 3.687329188  | 0.000244244 | 0.000644918 | no |
| HOKK3    | -0.1383249   | -3.687328794 | 0.000244245 | 0.000644918 | no |
| CENPJ    | -0.138321992 | -3.687249764 | 0.000244319 | 0.00064503  | no |
| EIF2A    | -0.138319987 | -3.687195268 | 0.00024437  | 0.000645082 | no |
| PDPK1    | -0.138310532 | -3.686938308 | 0.000244612 | 0.000645636 | no |
| SEC63    | -0.138280111 | -3.686111581 | 0.000245393 | 0.000647611 | no |
| KIF5A    | -0.138277276 | -3.686034535 | 0.000245465 | 0.000647719 | no |
| GRB10    | 0.138257691  | 3.685502285  | 0.000245969 | 0.000648963 | no |
| C7orf52  | -0.138211075 | -3.684235448 | 0.000247172 | 0.000652051 | no |
| PPM1H    | -0.138180684 | -3.68340954  | 0.000247959 | 0.000654043 | no |
| ZFPM2    | -0.138162847 | -3.682924823 | 0.000248422 | 0.000655178 | no |
| SLC39A14 | 0.138160374  | 3.682857625  | 0.000248486 | 0.000655262 | no |
| PAQR6    | -0.13812704  | -3.681951772 | 0.000249354 | 0.000657465 | no |
| LY6G5B   | -0.138122981 | -3.681841464 | 0.00024946  | 0.000657658 | no |
| SLC36A4  | 0.138114146  | 3.68160139   | 0.000249691 | 0.00065818  | no |
| DGKQ     | -0.13811191  | -3.681540607 | 0.000249749 | 0.000658248 | no |
| DLL1     | -0.138102478 | -3.681284301 | 0.000249995 | 0.000658812 | no |
| SLC4A10  | -0.138097789 | -3.681156875 | 0.000250118 | 0.000659049 | no |
| JMJD5    | -0.138092847 | -3.681022597 | 0.000250247 | 0.000659304 | no |
| SSBP2    | 0.138043924  | 3.679693155  | 0.00025153  | 0.000662598 | no |
| NXT1     | 0.1380169    | 3.678958808  | 0.000252241 | 0.000664385 | no |
| ARMC3    | 0.138000115  | 3.678502709  | 0.000252684 | 0.000665464 | no |
| BBS1     | -0.13799465  | -3.678354222 | 0.000252829 | 0.000665758 | no |
| DIRAS2   | -0.13797611  | -3.677850425 | 0.000253319 | 0.000666962 | no |
| CCDC160  | -0.137960379 | -3.677422958 | 0.000253735 | 0.000667971 | no |
| SYT16    | -0.137904389 | -3.675901582 | 0.000255223 | 0.000671801 | no |
| PPP3CA   | -0.137897682 | -3.675719324 | 0.000255402 | 0.000672184 | no |
| FLOT2    | 0.137841016  | 3.674179612  | 0.000256917 | 0.000676084 | no |
| EIF4E    | 0.137832615  | 3.673951335  | 0.000257143 | 0.000676589 | no |
| ESRP2    | 0.137818248  | 3.67356098   | 0.000257528 | 0.000677516 | no |
| C19orf51 | 0.137797943  | 3.673009272  | 0.000258075 | 0.000678865 | no |
| PRDM8    | -0.137782126 | -3.672579495 | 0.000258501 | 0.000679897 | no |
| INTS1    | -0.137769716 | -3.672242322 | 0.000258836 | 0.00068069  | no |
| VRK3     | 0.137755107  | 3.67184539   | 0.000259231 | 0.000681579 | no |
| FRMD3    | 0.137754701  | 3.671834363  | 0.000259242 | 0.000681579 | no |
| KRTCAP2  | 0.137749749  | 3.671699809  | 0.000259375 | 0.000681843 | no |
| TP53I11  | 0.137713984  | 3.670728059  | 0.000260345 | 0.000684302 | no |
| PYG02    | 0.137702257  | 3.670409448  | 0.000260663 | 0.00068505  | no |
| FAM172A  | 0.137700934  | 3.670373494  | 0.000260699 | 0.000685056 | no |
| ZNF32    | -0.137696672 | -3.670257699 | 0.000260815 | 0.000685271 | no |
| SLMAP    | 0.137648758  | 3.6689559    | 0.000262121 | 0.000688613 | no |
| ASB14    | -0.137646071 | -3.668882902 | 0.000262195 | 0.000688716 | no |
| LAMC2    | 0.137644283  | 3.668834307  | 0.000262243 | 0.000688755 | no |
| SETD3    | -0.137621209 | -3.668207407 | 0.000262875 | 0.000690324 | no |
| HOXA4    | 0.137616364  | 3.668075774  | 0.000263008 | 0.000690558 | no |



|           |              |              |             |             |    |
|-----------|--------------|--------------|-------------|-------------|----|
| AREG      | 0.137615469  | 3.668051468  | 0.000263032 | 0.000690558 | no |
| ACTG1     | 0.137572078  | 3.666872598  | 0.000264224 | 0.000693597 | no |
| TMEM20    | -0.137569078 | -3.666791071 | 0.000264307 | 0.000693723 | no |
| CASC1     | 0.137567001  | 3.666734645  | 0.000264364 | 0.000693783 | no |
| PLEKHM1   | 0.137547817  | 3.666213467  | 0.000264893 | 0.000695081 | no |
| R3HDM1    | -0.137546141 | -3.666167933 | 0.000264939 | 0.000695112 | no |
| MRPL22    | 0.137532156  | 3.665787973  | 0.000265325 | 0.000695953 | no |
| CYP17A1   | -0.137532047 | -3.665785027 | 0.000265328 | 0.000695953 | no |
| CROCCL2   | -0.137519963 | -3.665456736 | 0.000265662 | 0.000696677 | no |
| GABPB1    | 0.137519567  | 3.665445969  | 0.000265673 | 0.000696677 | no |
| TAF9B     | -0.137495852 | -3.664801675 | 0.000266633 | 0.000698309 | no |
| C4orf10   | -0.1373947   | -3.662053709 | 0.000269149 | 0.000705609 | no |
| KIAA0226  | -0.137391156 | -3.661957425 | 0.000269248 | 0.000705778 | no |
| NBL1      | 0.137380516  | 3.661668358  | 0.000269547 | 0.000706468 | no |
| ABCA1     | 0.137344776  | 3.66069745   | 0.000270551 | 0.000709008 | no |
| PTPN4     | -0.13732773  | -3.660234399 | 0.000271031 | 0.000710174 | no |
| LOC400891 | 0.137302735  | 3.659555391  | 0.000271736 | 0.00071193  | no |
| MFAP2     | 0.137285693  | 3.659092429  | 0.000272218 | 0.0007131   | no |
| FZD4      | 0.137280821  | 3.658960091  | 0.000272356 | 0.000713289 | no |
| ZNF846    | 0.13728066   | 3.65895572   | 0.000272361 | 0.000713289 | no |
| PPFIA4    | -0.137274592 | -3.658790874 | 0.000272533 | 0.000713646 | no |
| SYT13     | -0.137267914 | -3.658609485 | 0.000272722 | 0.00071405  | no |
| ACOT13    | 0.137234473  | 3.657701047  | 0.000273672 | 0.000716443 | no |
| NR2F1     | -0.137197875 | -3.656706903 | 0.000274715 | 0.000719081 | no |
| ABHD3     | 0.137193564  | 3.65658979   | 0.000274838 | 0.00071931  | no |
| STARD3NL  | 0.137186518  | 3.656398396  | 0.000275039 | 0.000719743 | no |
| TNXB      | 0.137169416  | 3.655933836  | 0.000275528 | 0.00072093  | no |
| TMEM104   | 0.137150821  | 3.65542874   | 0.000276061 | 0.000722231 | no |
| RORA      | -0.137111389 | -3.654357633 | 0.000277194 | 0.000725101 | no |
| LHX5      | -0.137103505 | -3.654143483 | 0.000277421 | 0.000725601 | no |
| WHSC1L1   | -0.13709686  | -3.653962963 | 0.000277612 | 0.000726008 | no |
| NICN1     | -0.137067928 | -3.653177097 | 0.000278448 | 0.000728098 | no |
| ARHGEF10  | 0.137064742  | 3.653090568  | 0.00027854  | 0.000728245 | no |
| LOC148145 | -0.13704763  | -3.652625753 | 0.000279035 | 0.000729446 | no |
| C1orf129  | 0.137033141  | 3.652232208  | 0.000279455 | 0.000730449 | no |
| C9orf130  | -0.137030066 | -3.652148681 | 0.000279544 | 0.000730588 | no |
| SELENBP1  | 0.137019833  | 3.651870728  | 0.000279841 | 0.00073127  | no |
| CCDC41    | -0.137014083 | -3.651714542 | 0.000280008 | 0.000731612 | no |
| PPA2      | 0.136965867  | 3.650404921  | 0.000281413 | 0.000735186 | no |
| RAB14     | -0.13696041  | -3.65025668  | 0.000281572 | 0.000735508 | no |
| C22orf23  | -0.136956505 | -3.65015062  | 0.000281686 | 0.000735711 | no |
| TDH       | -0.136940871 | -3.649725977 | 0.000282144 | 0.00073681  | no |
| UBL4B     | 0.136914171  | 3.649000797  | 0.000282926 | 0.000738758 | no |
| SLC2A4    | -0.136911979 | -3.64894124  | 0.000282991 | 0.00073883  | no |
| ZNF174    | -0.136846483 | -3.647162355 | 0.000284919 | 0.000743769 | no |
| LTV1      | 0.136813511  | 3.646266844  | 0.000285894 | 0.000746219 | no |
| CHFR      | 0.136796329  | 3.645800171  | 0.000286404 | 0.000747453 | no |
| ONECUT2   | -0.136734183 | -3.644112341 | 0.000288254 | 0.000752184 | no |
| ARMC6     | -0.136705579 | -3.643335501 | 0.00028911  | 0.000754319 | no |
| VAMP4     | -0.136697807 | -3.643124432 | 0.000289342 | 0.000754794 | no |
| WDR44     | 0.136697013  | 3.64310285   | 0.000289366 | 0.000754794 | no |

|           |              |              |             |             |    |
|-----------|--------------|--------------|-------------|-------------|----|
| GRHPR     | -0.136686087 | -3.642806126 | 0.000289694 | 0.000755551 | no |
| PTGS2     | 0.136682614  | 3.642711805  | 0.000289798 | 0.000755725 | no |
| LOC441204 | -0.136655761 | -3.641982521 | 0.000290605 | 0.000757731 | no |
| CRISPLD1  | 0.13664536   | 3.64170006   | 0.000290918 | 0.00075845  | no |
| SPINT2    | 0.136612651  | 3.640811743  | 0.000291905 | 0.000760924 | no |
| FHOD3     | -0.136587333 | -3.64012418  | 0.000292671 | 0.000762823 | no |
| FUT5      | -0.136567981 | -3.639598638 | 0.000293257 | 0.000764253 | no |
| TTBK2     | -0.136552518 | -3.639178708 | 0.000293727 | 0.000765378 | no |
| KCTD14    | 0.136532009  | 3.63862177   | 0.000294351 | 0.000766905 | no |
| EBF2      | 0.136522499  | 3.638363507  | 0.00029464  | 0.000767544 | no |
| PRG2      | 0.136520857  | 3.638318917  | 0.000294691 | 0.000767544 | no |
| C2orf68   | -0.136520225 | -3.638301743 | 0.00029471  | 0.000767544 | no |
| FOXD4L6   | -0.136505499 | -3.637901848 | 0.000295159 | 0.000768615 | no |
| FAM19A1   | -0.136503255 | -3.637840905 | 0.000295228 | 0.000768694 | no |
| TM9SF3    | -0.136472167 | -3.636996673 | 0.000296178 | 0.00077107  | no |
| ASPN      | 0.136449537  | 3.636382147  | 0.000296872 | 0.000772777 | no |
| C15orf50  | -0.136447938 | -3.636338716 | 0.000296921 | 0.000772806 | no |
| CWF19L2   | -0.13644003  | -3.636123978 | 0.000297164 | 0.000773338 | no |
| SF3B3     | -0.136428525 | -3.635811562 | 0.000297518 | 0.000774159 | no |
| ACER2     | 0.136407008  | 3.635227258  | 0.00029818  | 0.000775783 | no |
| EPHX2     | 0.136362655  | 3.634022846  | 0.00029955  | 0.000779247 | no |
| DGKD      | -0.13632111  | -3.632894737 | 0.000300839 | 0.000782498 | no |
| LRFN2     | -0.136316954 | -3.632781873 | 0.000300968 | 0.000782706 | no |
| ZNF790    | 0.136316053  | 3.632757401  | 0.000300996 | 0.000782706 | no |
| C6orf191  | 0.136309803  | 3.632587686  | 0.00030119  | 0.00078311  | no |
| PHLDA1    | -0.13629545  | -3.632197955 | 0.000301637 | 0.000784171 | no |
| CD36      | 0.136292628  | 3.632121322  | 0.000301725 | 0.000784299 | no |
| DLEU7     | 0.136284389  | 3.631897601  | 0.000301982 | 0.000784866 | no |
| AHNAK2    | 0.136280685  | 3.63179704   | 0.000302098 | 0.000785065 | no |
| RLN2      | 0.136270526  | 3.631521184  | 0.000302415 | 0.000785788 | no |
| FAM103A1  | 0.136262389  | 3.631300223  | 0.000302669 | 0.000786348 | no |
| C7orf33   | 0.136250432  | 3.630975545  | 0.000303043 | 0.000787218 | no |
| TRIM10    | 0.136241589  | 3.630735423  | 0.00030332  | 0.000787836 | no |
| MDFI      | -0.136237996 | -3.630637885 | 0.000303432 | 0.000788027 | no |
| ROR2      | 0.136226809  | 3.630334111  | 0.000303783 | 0.000788836 | no |
| SNX5      | 0.136222772  | 3.630224481  | 0.000303909 | 0.000789017 | no |
| TSPAN6    | 0.136222102  | 3.630206304  | 0.00030393  | 0.000789017 | no |
| CDK17     | -0.136199337 | -3.629588166 | 0.000304646 | 0.000790772 | no |
| RAET1G    | 0.136196949  | 3.629523329  | 0.000304721 | 0.000790865 | no |
| CDX1      | 0.136192268  | 3.62939622   | 0.000304868 | 0.000791146 | no |
| TMTC1     | 0.136154615  | 3.628373856  | 0.000306055 | 0.000794124 | no |
| TYW1      | 0.136152038  | 3.628303874  | 0.000306136 | 0.000794234 | no |
| JUN       | 0.136142597  | 3.628047534  | 0.000306435 | 0.000794906 | no |
| CTGF      | 0.136131162  | 3.627737052  | 0.000306796 | 0.000795742 | no |
| C20orf106 | 0.136126176  | 3.627601665  | 0.000306954 | 0.000796049 | no |
| C19orf26  | -0.136106316 | -3.627062429 | 0.000307584 | 0.00079758  | no |
| SNAP25    | -0.136056252 | -3.625703132 | 0.000309176 | 0.000801606 | no |
| WBP1      | -0.136042182 | -3.625321104 | 0.000309625 | 0.000802667 | no |
| PCNA      | 0.136011351  | 3.624484022  | 0.000310611 | 0.000805119 | no |
| PGM5      | 0.13601      | 3.624447343  | 0.000310654 | 0.000805128 | no |
| PARD3     | -0.135994692 | -3.624031715 | 0.000311144 | 0.000806296 | no |

|           |              |              |             |             |    |
|-----------|--------------|--------------|-------------|-------------|----|
| PTPDC1    | 0.135971001  | 3.623388497  | 0.000311905 | 0.000808163 | no |
| FZD3      | 0.135954189  | 3.622932045  | 0.000312446 | 0.000809461 | no |
| C14orf139 | 0.135936525  | 3.622452493  | 0.000313015 | 0.000810832 | no |
| SRCAP     | -0.135932887 | -3.622353695 | 0.000313133 | 0.000811032 | no |
| FGFR10P   | 0.13592705   | 3.622195237  | 0.000313321 | 0.000811416 | no |
| FKBP4     | -0.135918654 | -3.621967279 | 0.000313592 | 0.000812014 | no |
| SPTB      | -0.135914777 | -3.62186202  | 0.000313717 | 0.000812234 | no |
| F2RL1     | 0.135885383  | 3.62106401   | 0.000314669 | 0.000814593 | no |
| HAUS2     | 0.135852587  | 3.620173626  | 0.000315733 | 0.000817244 | no |
| SVOPL     | 0.13583002   | 3.619560959  | 0.000316468 | 0.000819041 | no |
| PLEKHB1   | -0.135807526 | -3.618950275 | 0.000317202 | 0.000820835 | no |
| SH3GL3    | -0.135790708 | -3.618493709 | 0.000317751 | 0.000822152 | no |
| ZNF572    | -0.135777903 | -3.618146065 | 0.00031817  | 0.000823131 | no |
| CDSN      | 0.135762748  | 3.617734647  | 0.000318667 | 0.00082431  | no |
| UTP11L    | 0.13575016   | 3.617392911  | 0.00031908  | 0.000825273 | no |
| LRRRC8B   | -0.135748461 | -3.617346778 | 0.000319136 | 0.000825312 | no |
| ZNF333    | -0.135726987 | -3.616763799 | 0.000319842 | 0.000826959 | no |
| ARHGAP10  | 0.135726599  | 3.61675329   | 0.000319854 | 0.000826959 | no |
| ALDH1L2   | -0.135723309 | -3.616663954 | 0.000319963 | 0.000827133 | no |
| OR2L13    | -0.135719507 | -3.616560746 | 0.000320088 | 0.000827351 | no |
| PCGF5     | 0.13571507   | 3.616440293  | 0.000320234 | 0.000827623 | no |
| PBOV1     | -0.13569682  | -3.61594485  | 0.000320836 | 0.000829072 | no |
| ZIM2      | -0.135685966 | -3.615650212 | 0.000321194 | 0.000829892 | no |
| MNS1      | 0.13565496   | 3.614808502  | 0.00032222  | 0.000832436 | no |
| OXER1     | 0.135628753  | 3.614097065  | 0.00032309  | 0.000834477 | no |
| SNPH      | -0.135628666 | -3.614094708 | 0.000323093 | 0.000834477 | no |
| DCLRE1A   | -0.135622147 | -3.613917735 | 0.000323309 | 0.000834861 | no |
| KCNN3     | -0.135621704 | -3.613905712 | 0.000323324 | 0.000834861 | no |
| NAPB      | -0.135597632 | -3.613252249 | 0.000324125 | 0.000836823 | no |
| ICAM2     | 0.135590237  | 3.613051511  | 0.000324372 | 0.000837352 | no |
| CHD5      | -0.135586395 | -3.612947216 | 0.0003245   | 0.000837576 | no |
| GPC4      | 0.135580488  | 3.612786868  | 0.000324697 | 0.000837887 | no |
| TMEM39B   | 0.135580306  | 3.612781928  | 0.000324703 | 0.000837887 | no |
| SRCIN1    | -0.135570484 | -3.612515292 | 0.000325031 | 0.000838573 | no |
| VASH1     | 0.135569212  | 3.612480762  | 0.000325073 | 0.000838573 | no |
| CYP11A1   | 0.135568619  | 3.612464652  | 0.000325093 | 0.000838573 | no |
| SFT2D3    | -0.135546819 | -3.611872901 | 0.000325822 | 0.000840346 | no |
| BAT1      | -0.135512525 | -3.610941966 | 0.000326972 | 0.000843205 | no |
| C11orf30  | -0.135498988 | -3.610574501 | 0.000327427 | 0.000844271 | no |
| C12orf12  | 0.135496604  | 3.610509799  | 0.000327508 | 0.000844437 | no |
| ATP5G3    | 0.135450213  | 3.60925052   | 0.000329072 | 0.000848295 | no |
| MYCBP2    | -0.135446406 | -3.609147194 | 0.000329201 | 0.000848518 | no |
| SIKE1     | 0.135428083  | 3.608649818  | 0.000329821 | 0.000850008 | no |
| ENPP7     | 0.135396448  | 3.60779114   | 0.000330894 | 0.000852657 | no |
| GIGYF2    | -0.13539529  | -3.607759712 | 0.000330933 | 0.000852657 | no |
| BREA2     | -0.13538566  | -3.607498314 | 0.00033126  | 0.000853392 | no |
| GLI4      | -0.135382522 | -3.607413127 | 0.000331367 | 0.000853558 | no |
| JAKMIP1   | -0.135380056 | -3.607346186 | 0.000331451 | 0.000853665 | no |
| PPIAL4C   | -0.135370679 | -3.60709166  | 0.00033177  | 0.000854379 | no |
| UBE2MP1   | 0.135366493  | 3.606978061  | 0.000331913 | 0.000854637 | no |
| TRIM31    | 0.135358503  | 3.60676116   | 0.000332185 | 0.000855229 | no |

|            |              |              |             |             |    |
|------------|--------------|--------------|-------------|-------------|----|
| KIAA0664P3 | -0.135325479 | -3.605864792 | 0.000333313 | 0.000858023 | no |
| LOC646999  | -0.135310442 | -3.605456649 | 0.000333827 | 0.000859226 | no |
| C1orf201   | 0.135309339  | 3.605426709  | 0.000333865 | 0.000859226 | no |
| H1FNT      | -0.135294274 | -3.605017813 | 0.000334381 | 0.000860446 | no |
| BTD        | 0.135277282  | 3.604556607  | 0.000334965 | 0.000861837 | no |
| FAM48B1    | 0.135271956  | 3.60441204   | 0.000335148 | 0.000862143 | no |
| AURKA      | 0.135271347  | 3.604395514  | 0.000335169 | 0.000862143 | no |
| PCSK1N     | -0.135253149 | -3.603901578 | 0.000335795 | 0.000863643 | no |
| SPRED2     | 0.135230247  | 3.603279967  | 0.000336584 | 0.000865564 | no |
| CDKN3      | 0.135211339  | 3.602766769  | 0.000337238 | 0.000867133 | no |
| CCL7       | 0.135196598  | 3.602366691  | 0.000337748 | 0.000868334 | no |
| C1orf182   | 0.135187758  | 3.602126752  | 0.000338054 | 0.000869011 | no |
| UBE2B      | 0.13513435   | 3.6006772    | 0.000339909 | 0.00087367  | no |
| GIN1       | -0.135122498 | -3.60035552  | 0.000340323 | 0.000874621 | no |
| RCOR3      | -0.135058148 | -3.598609056 | 0.000342573 | 0.000880294 | no |
| ZNF501     | -0.135051452 | -3.598427331 | 0.000342808 | 0.000880785 | no |
| HEPACAM    | -0.134984071 | -3.596598636 | 0.000345182 | 0.000886771 | no |
| ZNF432     | 0.134961319  | 3.595981166  | 0.000345987 | 0.000888725 | no |
| PLCE1      | 0.134952322  | 3.595737011  | 0.000346305 | 0.000889431 | no |
| ELMO2      | -0.134942956 | -3.595482826 | 0.000346637 | 0.000890171 | no |
| C9orf96    | -0.134911037 | -3.594616584 | 0.000347772 | 0.00089297  | no |
| FLJ11235   | 0.134901961  | 3.59437027   | 0.000348095 | 0.000893686 | no |
| SLC4A1AP   | -0.134871703 | -3.593549137 | 0.000349174 | 0.000896343 | no |
| LRTM1      | 0.134863106  | 3.593315838  | 0.000349481 | 0.000897018 | no |
| ATP5A1     | -0.134826969 | -3.592335179 | 0.000350775 | 0.000900225 | no |
| NKX2-2     | -0.134817097 | -3.592067258 | 0.000351129 | 0.00090102  | no |
| IL1RAP     | 0.134790229  | 3.591338154  | 0.000352095 | 0.000903383 | no |
| BSDC1      | -0.134788415 | -3.591288919 | 0.000352161 | 0.000903436 | no |
| PERP       | 0.134778862  | 3.591029674  | 0.000352505 | 0.000904204 | no |
| MRPL42     | 0.134754711  | 3.590374305  | 0.000353376 | 0.000906324 | no |
| THAP6      | 0.134750416  | 3.590257758  | 0.000353531 | 0.000906607 | no |
| IGFN1      | -0.134739475 | -3.589960864 | 0.000353927 | 0.000907506 | no |
| ARHGAP39   | -0.134686968 | -3.588536015 | 0.000355831 | 0.000912273 | no |
| ZNF608     | -0.134679079 | -3.588321944 | 0.000356118 | 0.000912893 | no |
| LOC389705  | -0.134672152 | -3.588133964 | 0.00035637  | 0.000913423 | no |
| CATSPER2   | -0.134652919 | -3.587612092 | 0.00035707  | 0.000915103 | no |
| OSGEPL1    | -0.134650603 | -3.587549238 | 0.000357155 | 0.000915119 | no |
| ATP8A2     | -0.134650272 | -3.587540243 | 0.000357167 | 0.000915119 | no |
| FUT11      | 0.134645589  | 3.587413186  | 0.000357338 | 0.00091544  | no |
| NTSR2      | -0.134589911 | -3.58590236  | 0.000359375 | 0.000920543 | no |
| SLC4A4     | -0.134586294 | -3.585804206 | 0.000359508 | 0.000920767 | no |
| FAM190A    | -0.134582994 | -3.585714656 | 0.000359629 | 0.00092096  | no |
| FAM122A    | 0.134581317  | 3.585669167  | 0.000359691 | 0.000921001 | no |
| PHF5A      | 0.134482671  | 3.58299249   | 0.00036333  | 0.000930202 | no |
| ZNF429     | -0.134453464 | -3.582200003 | 0.000364414 | 0.00093286  | no |
| TMTC2      | 0.134451305  | 3.582141432  | 0.000364495 | 0.000932947 | no |
| MPHOSPH8   | -0.134437085 | -3.581755591 | 0.000365024 | 0.000934183 | no |
| FAM72B     | 0.13437642   | 3.580109582  | 0.000367289 | 0.000939861 | no |
| SUFU       | -0.134367063 | -3.579855723 | 0.000367639 | 0.000940639 | no |
| SYNGR3     | -0.134352586 | -3.579462921 | 0.000368182 | 0.000941909 | no |
| GPR115     | 0.13432896   | 3.578821913  | 0.00036907  | 0.00094406  | no |

|              |              |              |             |             |    |
|--------------|--------------|--------------|-------------|-------------|----|
| SPRED1       | 0.134304624  | 3.578161635  | 0.000369986 | 0.000946284 | no |
| EEF1A2       | -0.134302495 | -3.578103878 | 0.000370066 | 0.00094637  | no |
| C1orf95      | -0.134297798 | -3.577976426 | 0.000370243 | 0.000946703 | no |
| TULP2        | 0.134239584  | 3.576397026  | 0.000372446 | 0.000952214 | no |
| SLC17A6      | -0.134225513 | -3.576015256 | 0.00037298  | 0.000953459 | no |
| LOC388387    | -0.134180666 | -3.574798542 | 0.000374687 | 0.000957702 | no |
| KCNK10       | -0.13417371  | -3.574609823 | 0.000374952 | 0.000958259 | no |
| REV1         | -0.134171297 | -3.574544364 | 0.000375044 | 0.000958291 | no |
| ZNF389       | -0.134170897 | -3.574533507 | 0.00037506  | 0.000958291 | no |
| CA11         | -0.134097476 | -3.572541637 | 0.000377873 | 0.000965357 | no |
| SPINK2       | 0.134068254  | 3.571748857  | 0.000378998 | 0.000968109 | no |
| NDUFA4L2     | 0.133935734  | 3.568153827  | 0.00038414  | 0.000981119 | no |
| NMRAL1       | 0.133928681  | 3.56796252   | 0.000384415 | 0.000981698 | no |
| AATK         | -0.133906674 | -3.567365527 | 0.000385276 | 0.000983772 | no |
| ZMAT2        | -0.133904941 | -3.567318497 | 0.000385344 | 0.000983821 | no |
| ADORA2B      | 0.133879231  | 3.566621069  | 0.000386352 | 0.00098627  | no |
| NFRKB        | -0.133861195 | -3.566131811 | 0.00038706  | 0.000987954 | no |
| MDH1B        | 0.133857142  | 3.566021873  | 0.00038722  | 0.000988236 | no |
| HIST2H2AA3   | 0.133843261  | 3.565645333  | 0.000387766 | 0.000989506 | no |
| LRRC36       | 0.133823695  | 3.565114587  | 0.000388537 | 0.000991349 | no |
| SDCCAG1      | -0.133821254 | -3.565048375 | 0.000388634 | 0.00099147  | no |
| ANGPTL6      | 0.133786532  | 3.564106497  | 0.000390006 | 0.000994846 | no |
| SNX33        | 0.133773472  | 3.563752227  | 0.000390524 | 0.000996041 | no |
| KLHL35       | -0.133765293 | -3.563530375 | 0.000390848 | 0.000996742 | no |
| TRIM78P      | 0.13375068   | 3.563134003  | 0.000391429 | 0.000998096 | no |
| MYH15        | -0.13374403  | -3.562953619 | 0.000391693 | 0.000998644 | no |
| C9orf37      | -0.133729633 | -3.562563091 | 0.000392266 | 0.000999958 | no |
| CLRN3        | 0.133728596  | 3.562534948  | 0.000392307 | 0.000999958 | no |
| HVCN1        | 0.133709671  | 3.562021605  | 0.000393061 | 0.001001754 | no |
| PCF11        | -0.133699318 | -3.561740795 | 0.000393474 | 0.00100268  | no |
| WDR73        | 0.133693625  | 3.561586366  | 0.000393702 | 0.001003133 | no |
| RWDD4A       | 0.133649413  | 3.560387151  | 0.000395472 | 0.001007516 | no |
| GREB1L       | -0.13361338  | -3.559409768 | 0.00039692  | 0.001011078 | no |
| KHDC1L       | -0.133596865 | -3.558961828 | 0.000397585 | 0.001012645 | no |
| TMC03        | 0.133578345  | 3.558459501  | 0.000398332 | 0.00101442  | no |
| NPM2         | -0.133565855 | -3.558120729 | 0.000398837 | 0.001015578 | no |
| ANO5         | -0.133538057 | -3.557366756 | 0.000399963 | 0.001018315 | no |
| PUS3         | -0.133528282 | -3.557101635 | 0.000400359 | 0.001019197 | no |
| LOC100131434 | 0.133508708  | 3.556570728  | 0.000401154 | 0.001021092 | no |
| MAS1L        | 0.133485626  | 3.555944697  | 0.000402093 | 0.001023354 | no |
| CDKN2D       | -0.133471262 | -3.555555112 | 0.000402679 | 0.001024716 | no |
| FSD1L        | -0.133452797 | -3.555054292 | 0.000403433 | 0.001026505 | no |
| TEAD4        | 0.133448161  | 3.554928569  | 0.000403623 | 0.001026858 | no |
| ALS2CR12     | 0.13343063   | 3.554453086  | 0.00040434  | 0.001028554 | no |
| SEC22A       | 0.133414331  | 3.554011023  | 0.000405008 | 0.001030123 | no |
| DGAT1        | -0.133408204 | -3.553844846 | 0.000405259 | 0.001030633 | no |
| SUM04        | 0.133405181  | 3.55376287   | 0.000405383 | 0.001030819 | no |
| MAPK3        | -0.133391294 | -3.553386229 | 0.000405954 | 0.00103214  | no |
| IGFL4        | -0.133373926 | -3.552915184 | 0.000406668 | 0.001033827 | no |
| PHF3         | -0.133337563 | -3.551928988 | 0.000408168 | 0.001037509 | no |
| C1orf87      | 0.133327236  | 3.551648899  | 0.000408595 | 0.001038463 | no |

|              |              |              |             |             |    |
|--------------|--------------|--------------|-------------|-------------|----|
| CABP1        | -0.13330388  | -3.551015468 | 0.000409562 | 0.00104079  | no |
| TMEM182      | 0.133281906  | 3.550419527  | 0.000410474 | 0.001042976 | no |
| NOTCH2NL     | 0.133272276  | 3.550158361  | 0.000410874 | 0.001043862 | no |
| DIO3OS       | 0.133266314  | 3.549996672  | 0.000411122 | 0.001044436 | no |
| TYMS         | 0.133245596  | 3.549434804  | 0.000411984 | 0.001046365 | no |
| PDZD2        | -0.133244877 | -3.549415301 | 0.000412014 | 0.001046365 | no |
| GNASAS       | 0.133192703  | 3.54800038   | 0.000414194 | 0.001051769 | no |
| C2orf70      | 0.133158445  | 3.547071325  | 0.000415632 | 0.001055286 | no |
| DHX32        | 0.133144563  | 3.546694887  | 0.000416215 | 0.001056635 | no |
| MRPL28       | -0.133138208 | -3.546522536 | 0.000416483 | 0.001057181 | no |
| NKTR         | -0.133124553 | -3.546152219 | 0.000417058 | 0.001058508 | no |
| PCDH19       | -0.13311642  | -3.545931664 | 0.000417401 | 0.001059246 | no |
| BARD1        | 0.133083541  | 3.545040054  | 0.00041879  | 0.001062638 | no |
| FAM110C      | 0.133028799  | 3.543555581  | 0.000421113 | 0.001068397 | no |
| SLC39A9      | -0.133022268 | -3.543378469 | 0.00042139  | 0.001068968 | no |
| PTF1A        | -0.133011982 | -3.543099564 | 0.000421828 | 0.001069902 | no |
| RABL2B       | 0.133011137  | 3.543076641  | 0.000421864 | 0.001069902 | no |
| IL12A        | -0.133003602 | -3.542872306 | 0.000422186 | 0.001070582 | no |
| GNB4         | 0.132986232  | 3.54240129   | 0.000422927 | 0.001072327 | no |
| C1orf161     | 0.132929138  | 3.540853098  | 0.000425372 | 0.001078391 | no |
| SIRT2        | -0.132860646 | -3.538995879 | 0.000428322 | 0.001085734 | no |
| C17orf95     | 0.132848958  | 3.538678941  | 0.000428827 | 0.001086879 | no |
| SCN2B        | -0.132838841 | -3.538404628 | 0.000429265 | 0.001087852 | no |
| C6orf132     | 0.132834561  | 3.538288573  | 0.000429451 | 0.001088185 | no |
| LOC100129055 | -0.132830434 | -3.538176647 | 0.000429629 | 0.001088502 | no |
| DYRK1A       | -0.132826279 | -3.538063982 | 0.00042981  | 0.001088757 | no |
| CDHR4        | 0.132825633  | 3.538046468  | 0.000429838 | 0.001088757 | no |
| TMEM62       | 0.132800555  | 3.537366473  | 0.000430926 | 0.001091377 | no |
| HSD17B7P2    | -0.13278745  | -3.537011154 | 0.000431496 | 0.001092683 | no |
| SLC05A1      | -0.132739807 | -3.535719339 | 0.000433574 | 0.001097807 | no |
| ZNF317       | -0.132734907 | -3.535586483 | 0.000433788 | 0.001098212 | no |
| C9orf117     | 0.132726281  | 3.53535259   | 0.000434165 | 0.00109903  | no |
| KCTD13       | -0.132723085 | -3.535265927 | 0.000434305 | 0.001099246 | no |
| CDON         | -0.132720479 | -3.535195275 | 0.000434419 | 0.001099398 | no |
| GPR161       | -0.132717805 | -3.535122767 | 0.000434536 | 0.001099556 | no |
| ATP5J2       | 0.1327162    | 3.53507925   | 0.000434607 | 0.001099597 | no |
| NAT15        | -0.132710107 | -3.534914056 | 0.000434874 | 0.001100134 | no |
| ADAMTS6      | -0.132686263 | -3.534267536 | 0.00043592  | 0.001102643 | no |
| ZC3H3        | -0.132683667 | -3.534197145 | 0.000436034 | 0.001102794 | no |
| CES4         | 0.132676707  | 3.534008438  | 0.00043634  | 0.001103429 | no |
| C1QTNF4      | -0.132664446 | -3.53367601  | 0.000436879 | 0.001104655 | no |
| XKRX         | 0.13263472   | 3.532870039  | 0.000438189 | 0.00110783  | no |
| PLA2G7       | 0.132626934  | 3.532658949  | 0.000438533 | 0.00110856  | no |
| ADAMTS7      | 0.132618434  | 3.532428476  | 0.000438909 | 0.001109371 | no |
| FNDC7        | 0.132589534  | 3.531644919  | 0.000440188 | 0.001112466 | no |
| ENDOU        | -0.132582727 | -3.531460353 | 0.00044049  | 0.001113089 | no |
| ARHGEF12     | -0.132580266 | -3.531393652 | 0.000440599 | 0.001113226 | no |
| SUSD5        | -0.132570688 | -3.531133971 | 0.000441024 | 0.001114161 | no |
| EIF4E1B      | -0.132556499 | -3.530749251 | 0.000441655 | 0.001115614 | no |
| ERCC6L       | 0.132542579  | 3.530371871  | 0.000442274 | 0.001117039 | no |
| UBXN10       | 0.132505305  | 3.529361288  | 0.000443937 | 0.001121098 | no |

|          |              |              |             |             |    |
|----------|--------------|--------------|-------------|-------------|----|
| FNDC8    | -0.132495829 | -3.529104386 | 0.00044436  | 0.001122028 | no |
| RSU1     | 0.132456735  | 3.528044508  | 0.000446112 | 0.00112631  | no |
| DAPK1    | -0.132421784 | -3.52709695  | 0.000447683 | 0.001130135 | no |
| ZNF200   | 0.132412635  | 3.526848901  | 0.000448095 | 0.001131035 | no |
| KCNMB2   | -0.13239715  | -3.526429107 | 0.000448794 | 0.001132656 | no |
| NAPG     | -0.132376394 | -3.525866388 | 0.000449731 | 0.001134816 | no |
| CPSF4    | 0.132375724  | 3.525848232  | 0.000449762 | 0.001134816 | no |
| ZNF862   | -0.132341873 | -3.524930546 | 0.000451295 | 0.001138543 | no |
| PDE4DIP  | -0.132299427 | -3.523779849 | 0.000453224 | 0.001143268 | no |
| C16orf71 | 0.132279694  | 3.523244904  | 0.000454124 | 0.001145394 | no |
| PPBP     | 0.132243684  | 3.522268698  | 0.00045577  | 0.001149403 | no |
| UBAC2    | 0.132236884  | 3.522084367  | 0.000456082 | 0.001150045 | no |
| DFNA5    | 0.132224348  | 3.521744519  | 0.000456656 | 0.00115135  | no |
| NME7     | 0.132214988  | 3.521490778  | 0.000457086 | 0.00115229  | no |
| DDA1     | -0.13221283  | -3.521432297 | 0.000457185 | 0.001152396 | no |
| BAT2L1   | -0.132209468 | -3.52134114  | 0.000457339 | 0.001152641 | no |
| ABL1     | -0.132186512 | -3.520718864 | 0.000458395 | 0.001155158 | no |
| PSMC6    | -0.132165201 | -3.520141152 | 0.000459377 | 0.001157488 | no |
| ACVR1C   | -0.132162098 | -3.520057035 | 0.00045952  | 0.001157704 | no |
| MRPL47   | 0.132135251  | 3.519329286  | 0.00046076  | 0.001160684 | no |
| CAMK2B   | -0.132111777 | -3.518692959 | 0.000461847 | 0.001163278 | no |
| C17orf50 | -0.132104291 | -3.518490031 | 0.000462194 | 0.001164007 | no |
| GMDS     | 0.132089767  | 3.518096318  | 0.000462869 | 0.001165517 | no |
| C9orf11  | -0.132088888 | -3.518072507 | 0.000462909 | 0.001165517 | no |
| RAB27B   | -0.132085117 | -3.517970289 | 0.000463085 | 0.001165813 | no |
| LOC90586 | 0.132065724  | 3.517444599  | 0.000463987 | 0.001167939 | no |
| ZNF732   | -0.132056988 | -3.51720779  | 0.000464394 | 0.001168817 | no |
| KIAA0947 | -0.132023906 | -3.516311043 | 0.000465937 | 0.001172557 | no |
| DNM2     | 0.132019825  | 3.516200422  | 0.000466128 | 0.001172891 | no |
| NUP62CL  | 0.131998414  | 3.515620064  | 0.00046713  | 0.001175194 | no |
| FBX018   | -0.131997784 | -3.515602969 | 0.00046716  | 0.001175194 | no |
| DNM1L    | -0.131990192 | -3.515397194 | 0.000467516 | 0.001175943 | no |
| KIF20A   | 0.131966808  | 3.514763348  | 0.000468613 | 0.001178557 | no |
| CCDC108  | 0.131944376  | 3.514155316  | 0.000469668 | 0.001181064 | no |
| AMPH     | -0.131934567 | -3.513889427 | 0.00047013  | 0.001182079 | no |
| SGMS1    | -0.131907178 | -3.513147063 | 0.000471423 | 0.001185181 | no |
| PDS5B    | -0.13190325  | -3.513040594 | 0.000471608 | 0.0011855   | no |
| RALYL    | -0.131881521 | -3.512451626 | 0.000472637 | 0.001187937 | no |
| NDUFS7   | -0.131843483 | -3.511420617 | 0.000474441 | 0.001192325 | no |
| TLE6     | -0.131841088 | -3.511355689 | 0.000474555 | 0.001192463 | no |
| ABLIM2   | -0.131826159 | -3.510951064 | 0.000475265 | 0.001194085 | no |
| RNF126   | -0.131825038 | -3.510920687 | 0.000475319 | 0.001194085 | no |
| GYS1     | 0.131791875  | 3.510021822  | 0.0004769   | 0.001197909 | no |
| CBLN2    | -0.131783876 | -3.509805031 | 0.000477282 | 0.00119872  | no |
| MRPL33   | 0.131774666  | 3.509555386  | 0.000477723 | 0.001199677 | no |
| NT5C1B   | 0.131693877  | 3.507365754  | 0.000481602 | 0.001209269 | no |
| BHMT2    | 0.131691861  | 3.507311111  | 0.000481699 | 0.001209363 | no |
| PIP5K1A  | 0.131679718  | 3.506982     | 0.000482285 | 0.001210683 | no |
| COL19A1  | 0.131674635  | 3.506844248  | 0.00048253  | 0.001211149 | no |
| MAEA     | 0.131651955  | 3.506229556  | 0.000483627 | 0.00121375  | no |
| PLAGL2   | 0.131565059  | 3.503874518  | 0.000487848 | 0.001224193 | no |

|            |              |              |             |             |    |
|------------|--------------|--------------|-------------|-------------|----|
| SPRR2G     | -0.131553944 | -3.503573287 | 0.000488391 | 0.00122538  | no |
| PSMD8      | 0.131552885  | 3.503544583  | 0.000488443 | 0.00122538  | no |
| CEP97      | -0.13154187  | -3.503246065 | 0.000488981 | 0.001226578 | no |
| POMC       | 0.131524741  | 3.502781863  | 0.000489819 | 0.001228414 | no |
| IL8        | 0.131524424  | 3.502773258  | 0.000489834 | 0.001228414 | no |
| SNCG       | -0.131514238 | -3.502497213 | 0.000490333 | 0.001229513 | no |
| EXOSC2     | -0.13151129  | -3.502417311 | 0.000490478 | 0.001229613 | no |
| ACSS1      | -0.131510557 | -3.50239747  | 0.000490514 | 0.001229613 | no |
| WIPF2      | -0.131509703 | -3.502374321 | 0.000490556 | 0.001229613 | no |
| FAM156A    | -0.131507842 | -3.502323884 | 0.000490647 | 0.001229689 | no |
| C2CD3      | -0.131490495 | -3.501853778 | 0.000491498 | 0.00123167  | no |
| LRIG3      | 0.13147792   | 3.501512978  | 0.000492116 | 0.001233066 | no |
| GPIHBP1    | -0.131472758 | -3.501373084 | 0.00049237  | 0.001233549 | no |
| ZNF154     | -0.131460432 | -3.501039061 | 0.000492977 | 0.001234833 | no |
| SYTL4      | -0.131458899 | -3.500997506 | 0.000493053 | 0.001234833 | no |
| STIL       | 0.131458632  | 3.500990271  | 0.000493066 | 0.001234833 | no |
| ST6GALNAC1 | -0.131425323 | -3.500087582 | 0.000494709 | 0.001238795 | no |
| LOC442421  | -0.131351116 | -3.498076634 | 0.000498389 | 0.001247855 | no |
| BTAF1      | -0.13130046  | -3.496703899 | 0.000500916 | 0.001254026 | no |
| C1orf158   | 0.131292381  | 3.496484979  | 0.00050132  | 0.001254882 | no |
| SAMD8      | -0.131274445 | -3.495998953 | 0.000502218 | 0.001256975 | no |
| ZYG11B     | -0.131262518 | -3.495675742 | 0.000502816 | 0.001258316 | no |
| ITGA6      | 0.131249671  | 3.495327607  | 0.000503461 | 0.001259774 | no |
| TRIM26     | 0.131240566  | 3.4950809    | 0.000503919 | 0.001260763 | no |
| ZNF781     | -0.131227359 | -3.494723014 | 0.000504583 | 0.001262269 | no |
| CAMKV      | -0.131224332 | -3.494640992 | 0.000504735 | 0.001262494 | no |
| RNF144A    | -0.131196995 | -3.493900225 | 0.000506113 | 0.001265784 | no |
| SLC2A2     | 0.131186794  | 3.493623802  | 0.000506629 | 0.001266916 | no |
| GPR12      | -0.131179601 | -3.493428881 | 0.000506992 | 0.001267669 | no |
| PPA1       | -0.131167403 | -3.493098371 | 0.000507609 | 0.001269054 | no |
| CAB39      | 0.131162711  | 3.492971223  | 0.000507847 | 0.001269491 | no |
| AK7        | 0.13115511   | 3.492765248  | 0.000508232 | 0.001270297 | no |
| ZNF230     | 0.131152704  | 3.492700054  | 0.000508354 | 0.001270445 | no |
| UTP14C     | -0.131134264 | -3.492200402 | 0.000509289 | 0.001272625 | no |
| C15orf44   | 0.131131426  | 3.492123499  | 0.000509433 | 0.001272769 | no |
| CBWD6      | 0.131130649  | 3.49210245   | 0.000509473 | 0.001272769 | no |
| RRM2       | 0.131122014  | 3.491868458  | 0.000509911 | 0.001273586 | no |
| HTR6       | -0.131121732 | -3.491860822 | 0.000509926 | 0.001273586 | no |
| HP         | 0.131120097  | 3.491816522  | 0.000510009 | 0.001273636 | no |
| MTIF2      | 0.131080729  | 3.490749795  | 0.000512014 | 0.001278425 | no |
| MAN2C1     | -0.131079966 | -3.490729131 | 0.000512053 | 0.001278425 | no |
| NAA11      | -0.131074762 | -3.490588122 | 0.000512319 | 0.00127893  | no |
| PSORS1C1   | 0.131052512  | 3.489985219  | 0.000513456 | 0.001281611 | no |
| ZNF503     | 0.13101378   | 3.488935752  | 0.000515441 | 0.001286407 | no |
| FANCE      | -0.131011138 | -3.488864165 | 0.000515576 | 0.001286586 | no |
| CLEC2L     | -0.131009768 | -3.488827042 | 0.000515647 | 0.001286603 | no |
| KCNA4      | -0.130972994 | -3.487830664 | 0.000517539 | 0.001291164 | no |
| C21orf121  | 0.130938588  | 3.486898438  | 0.000519315 | 0.001295435 | no |
| ANKRD49    | 0.130924333  | 3.486512214  | 0.000520052 | 0.001297115 | no |
| UBXN6      | -0.130918771 | -3.486361502 | 0.00052034  | 0.001297673 | no |
| UBXN11     | 0.130897128  | 3.485775099  | 0.000521462 | 0.001300311 | no |



|              |              |              |             |             |    |
|--------------|--------------|--------------|-------------|-------------|----|
| LOC147804    | 0.130887621  | 3.485517518  | 0.000521956 | 0.001301382 | no |
| CCNB3        | -0.130880743 | -3.485331157 | 0.000522313 | 0.001302112 | no |
| SNHG8        | -0.130872951 | -3.485120058 | 0.000522718 | 0.001302962 | no |
| PEX26        | -0.130862928 | -3.484848482 | 0.00052324  | 0.001304101 | no |
| WDR61        | 0.130839073  | 3.484202165  | 0.000524483 | 0.001307039 | no |
| GK2          | -0.130824283 | -3.483801466 | 0.000525256 | 0.001308802 | no |
| GSTM2        | -0.130814784 | -3.483544097 | 0.000525752 | 0.001309878 | no |
| ZNF800       | 0.130805668  | 3.483297121  | 0.000526229 | 0.001310905 | no |
| PTK7         | 0.130802318  | 3.483206358  | 0.000526405 | 0.00131118  | no |
| LZIC         | 0.130792733  | 3.48294666   | 0.000526907 | 0.001312147 | no |
| SLC35E1      | 0.130792424  | 3.482938313  | 0.000526923 | 0.001312147 | no |
| MED21        | 0.130786375  | 3.482774405  | 0.00052724  | 0.001312775 | no |
| WDR18        | -0.130777729 | -3.482540167 | 0.000527693 | 0.001313743 | no |
| MAGI2        | -0.130763161 | -3.482145472 | 0.000528458 | 0.001315485 | no |
| SPATA2       | -0.130740548 | -3.481532847 | 0.000529648 | 0.001318284 | no |
| SBK2         | 0.130720615  | 3.480992805  | 0.000530698 | 0.001320736 | no |
| SERINC1      | -0.130716835 | -3.480890414 | 0.000530898 | 0.00132107  | no |
| KBTBD10      | 0.130709056  | 3.480679649  | 0.000531309 | 0.001321929 | no |
| SNAP47       | -0.130669858 | -3.47961771  | 0.000533382 | 0.001326926 | no |
| FAM123B      | -0.130660183 | -3.479355592 | 0.000533895 | 0.001328039 | no |
| TP53I3       | 0.130650474  | 3.479092556  | 0.000534411 | 0.001329023 | no |
| FER1L4       | 0.130650253  | 3.479086577  | 0.000534422 | 0.001329023 | no |
| LRRC46       | 0.130645975  | 3.47897067   | 0.00053465  | 0.001329424 | no |
| AIP          | -0.130620868 | -3.47829051  | 0.000535985 | 0.001332571 | no |
| MPI          | -0.1306197   | -3.478258866 | 0.000536047 | 0.001332571 | no |
| BANF2        | 0.130613707  | 3.478096503  | 0.000536366 | 0.0013332   | no |
| OVOL1        | -0.130606159 | -3.477892004 | 0.000536769 | 0.001334036 | no |
| EIF3CL       | -0.130596266 | -3.477624006 | 0.000537296 | 0.001335184 | no |
| HARS         | -0.130591967 | -3.477507548 | 0.000537526 | 0.00133559  | no |
| C19orf29     | -0.130588927 | -3.477425186 | 0.000537688 | 0.001335829 | no |
| SUCLA2       | -0.130583317 | -3.477273206 | 0.000537988 | 0.001336409 | no |
| TCEAL6       | -0.130575773 | -3.477068844 | 0.000538391 | 0.001337246 | no |
| IRX2         | -0.130565345 | -3.476786339 | 0.000538949 | 0.001338467 | no |
| UBB          | 0.130495693  | 3.47489944   | 0.000542688 | 0.001347589 | no |
| APCDD1       | -0.130484193 | -3.474587908 | 0.000543308 | 0.001348962 | no |
| PROC         | 0.130445431  | 3.473537869  | 0.000545402 | 0.001353994 | no |
| ZNF397       | -0.130413166 | -3.472663856 | 0.00054715  | 0.001358168 | no |
| LOC401010    | -0.130382234 | -3.471825944 | 0.000548831 | 0.001362094 | no |
| NR4A3        | 0.130381592  | 3.471808555  | 0.000548866 | 0.001362094 | no |
| CCDC81       | 0.130354503  | 3.471074749  | 0.000550343 | 0.00136559  | no |
| DDX54        | -0.130345445 | -3.470829386 | 0.000550837 | 0.001366649 | no |
| ADI1         | 0.130319994  | 3.470139959  | 0.000552229 | 0.001369934 | no |
| CHMP2B       | 0.130317639  | 3.470076184  | 0.000552358 | 0.001370085 | no |
| WDR67        | 0.130313639  | 3.469967832  | 0.000552577 | 0.00137046  | no |
| LRRC48       | 0.130301823  | 3.469647751  | 0.000553224 | 0.001371898 | no |
| ZNF322B      | -0.130296459 | -3.469502457 | 0.000553518 | 0.001372459 | no |
| FANCB        | 0.13027871   | 3.469021679  | 0.000554493 | 0.001374707 | no |
| LOC100009676 | 0.130240175  | 3.467977867  | 0.000556614 | 0.001379797 | no |
| SPATA20      | 0.130233984  | 3.467810175  | 0.000556956 | 0.001380474 | no |
| LOR          | -0.130227945 | -3.467646608 | 0.000557289 | 0.00138103  | no |
| TCHP         | -0.130227445 | -3.467633061 | 0.000557316 | 0.00138103  | no |

|              |              |              |             |             |    |
|--------------|--------------|--------------|-------------|-------------|----|
| SLC41A3      | -0.130226002 | -3.467593967 | 0.000557396 | 0.001381058 | no |
| DDX17        | -0.130194862 | -3.466750493 | 0.000559118 | 0.001385155 | no |
| LY6G6D       | 0.1301869    | 3.466534826  | 0.000559559 | 0.001385883 | no |
| IGDCC3       | -0.130186312 | -3.466518891 | 0.000559592 | 0.001385883 | no |
| PCDHA1       | -0.130185846 | -3.466506277 | 0.000559618 | 0.001385883 | no |
| TET3         | -0.13017296  | -3.466157256 | 0.000560332 | 0.001387482 | no |
| LOC100133985 | -0.130153407 | -3.465627618 | 0.000561418 | 0.001389846 | no |
| C14orf109    | 0.130153296  | 3.465624617  | 0.000561424 | 0.001389846 | no |
| RIBC1        | 0.13014981   | 3.465530189  | 0.000561618 | 0.001390156 | no |
| KLHL33       | 0.13012616   | 3.464889623  | 0.000562935 | 0.001393244 | no |
| MIDN         | -0.130098259 | -3.46413391  | 0.000564491 | 0.001396926 | no |
| GLRA3        | -0.130042267 | -3.462617342 | 0.000567628 | 0.001404516 | no |
| TUBGCP5      | -0.130008642 | -3.461706627 | 0.000569519 | 0.001409023 | no |
| SLC13A3      | 0.130006318  | 3.461643692  | 0.00056965  | 0.001409174 | no |
| NT5C2        | -0.129995935 | -3.461362453 | 0.000570235 | 0.00141045  | no |
| TOB1         | 0.129934483  | 3.45969809   | 0.000573711 | 0.001418825 | no |
| ADCYAP1R1    | -0.129933586 | -3.4596738   | 0.000573762 | 0.001418825 | no |
| RAD52        | -0.129930452 | -3.459588905 | 0.000573939 | 0.001419091 | no |
| GAS2L2       | 0.129926165  | 3.459472805  | 0.000574183 | 0.001419519 | no |
| RALBP1       | 0.129917606  | 3.459241016  | 0.000574669 | 0.001420547 | no |
| VCX3B        | 0.129863336  | 3.457771184  | 0.000577759 | 0.001428012 | no |
| GAN          | -0.129858878 | -3.457650448 | 0.000578014 | 0.001428466 | no |
| C1orf31      | 0.129854711  | 3.457537591  | 0.000578252 | 0.00142888  | no |
| TDG          | 0.129841023  | 3.457166901  | 0.000579034 | 0.001430639 | no |
| ZNF717       | -0.129839197 | -3.45711744  | 0.000579139 | 0.001430722 | no |
| AGPS         | 0.129836706  | 3.457049973  | 0.000579281 | 0.001430899 | no |
| PRPF39       | -0.129822544 | -3.456666443 | 0.000580092 | 0.001432727 | no |
| BCORL2       | 0.129779207  | 3.455492767  | 0.000582581 | 0.001438697 | no |
| GAL3ST1      | -0.12971645  | -3.453793189 | 0.000586202 | 0.001447462 | no |
| EIF5AL1      | 0.129714404  | 3.453737785  | 0.00058632  | 0.001447578 | no |
| HERC6        | 0.129704875  | 3.453479737  | 0.000586872 | 0.001448763 | no |
| PNKP         | 0.129701364  | 3.453384665  | 0.000587075 | 0.001449088 | no |
| KLK1         | 0.129691335  | 3.453113057  | 0.000587656 | 0.001450346 | no |
| ASF1B        | 0.12965159   | 3.452036727  | 0.000589966 | 0.001455868 | no |
| ACOT12       | 0.129603803  | 3.450742623  | 0.000592753 | 0.001462569 | no |
| SEL1L2       | 0.129600373  | 3.45064974   | 0.000592954 | 0.001462885 | no |
| SCARNA9      | -0.129593421 | -3.450461476 | 0.000593361 | 0.00146371  | no |
| C12orf60     | 0.129584326  | 3.450215185  | 0.000593893 | 0.001464845 | no |
| C21orf59     | 0.129569476  | 3.44981305   | 0.000594763 | 0.001466812 | no |
| FAM35B2      | -0.129544882 | -3.449147067 | 0.000596207 | 0.001470194 | no |
| CHML         | -0.129530464 | -3.44875663  | 0.000597056 | 0.001472106 | no |
| TWIST2       | 0.129523815  | 3.448576577  | 0.000597447 | 0.001472892 | no |
| STAC         | 0.12950766   | 3.44813912   | 0.000598399 | 0.001475059 | no |
| KCNA2        | -0.129480624 | -3.447407001 | 0.000599996 | 0.001478814 | no |
| CALCRL       | -0.129457646 | -3.446784781 | 0.000601356 | 0.001481937 | no |
| COX7B        | 0.129456743  | 3.446760342  | 0.000601409 | 0.001481937 | no |
| TMEM130      | -0.129450338 | -3.446586895 | 0.000601789 | 0.001482692 | no |
| ALG1L        | -0.129431968 | -3.446089454 | 0.000602879 | 0.001485197 | no |
| MEPCE        | -0.129423875 | -3.445870322 | 0.00060336  | 0.0014862   | no |
| HRNBP3       | -0.129413985 | -3.445602513 | 0.000603948 | 0.001487467 | no |
| CSF2         | 0.129386273  | 3.444852131  | 0.000605599 | 0.001491351 | no |

|             |              |              |             |             |    |
|-------------|--------------|--------------|-------------|-------------|----|
| IVL         | -0.129374679 | -3.444538195 | 0.00060629  | 0.001492873 | no |
| BRCA1       | 0.12934958   | 3.443858559  | 0.000607791 | 0.001496385 | no |
| NR2E3       | -0.129346695 | -3.44378044  | 0.000607963 | 0.001496628 | no |
| NR4A2       | 0.129334447  | 3.443448806  | 0.000608697 | 0.001498251 | no |
| SETD6       | -0.129322397 | -3.443122527 | 0.000609419 | 0.001499847 | no |
| WBP11P1     | -0.129304817 | -3.442646509 | 0.000610475 | 0.001502261 | no |
| KCNK7       | -0.12929908  | -3.442491177 | 0.00061082  | 0.001502927 | no |
| RBM22       | -0.129296543 | -3.442422479 | 0.000610972 | 0.001503119 | no |
| FAM76B      | -0.129241337 | -3.440927679 | 0.0006143   | 0.001511123 | no |
| STAP2       | 0.12920684   | 3.439993646  | 0.000616388 | 0.001516075 | no |
| MYOM2       | -0.129173306 | -3.439085691 | 0.000618424 | 0.001520898 | no |
| UBE2E2      | -0.129164601 | -3.438849998 | 0.000618954 | 0.001522015 | no |
| FUT2        | -0.129162198 | -3.438784914 | 0.0006191   | 0.00152219  | no |
| TMEM189     | 0.129146107  | 3.438349268  | 0.00062008  | 0.001524414 | no |
| PLD3        | 0.129083538  | 3.436655215  | 0.000623906 | 0.001533632 | no |
| SCARB1      | -0.129076759 | -3.436471662 | 0.000624321 | 0.001534468 | no |
| C11orf17    | 0.129069109  | 3.43626454   | 0.000624791 | 0.001535435 | no |
| C10orf107   | 0.129051002  | 3.435774321  | 0.000625903 | 0.001537982 | no |
| C6orf195    | 0.129043124  | 3.435561004  | 0.000626388 | 0.001538986 | no |
| LARP4B      | -0.12903145  | -3.435244959 | 0.000627107 | 0.001540565 | no |
| TGS1        | 0.129027939  | 3.435149908  | 0.000627323 | 0.001540909 | no |
| CCDC146     | 0.129015366  | 3.434809502  | 0.000628098 | 0.001542626 | no |
| ARSI        | 0.129010042  | 3.434665347  | 0.000628427 | 0.001543113 | no |
| RPS23       | -0.129009679 | -3.434655523 | 0.000628449 | 0.001543113 | no |
| PPP1R3D     | 0.128991416  | 3.434161086  | 0.000629578 | 0.001545695 | no |
| GRM2        | -0.128953775 | -3.433142004 | 0.000631909 | 0.001551231 | no |
| SLC37A1     | 0.128930618  | 3.432515064  | 0.000633347 | 0.001554573 | no |
| CLIP4       | -0.128906741 | -3.431868657 | 0.000634833 | 0.001558031 | no |
| TUBA8       | -0.128893263 | -3.431503768 | 0.000635674 | 0.001559904 | no |
| MFSD4       | -0.128871323 | -3.430909803 | 0.000637044 | 0.001563076 | no |
| TBC1D3B     | -0.128864674 | -3.430729796 | 0.000637459 | 0.001563831 | no |
| RNF6        | 0.128863929  | 3.430709631  | 0.000637506 | 0.001563831 | no |
| SFTPD       | -0.128854122 | -3.430444122 | 0.00063812  | 0.001565147 | no |
| SLC9A11     | 0.128846547  | 3.430239071  | 0.000638594 | 0.00156612  | no |
| HPGD        | 0.128831589  | 3.429834102  | 0.000639532 | 0.00156823  | no |
| NDUFB3      | 0.128812918  | 3.429328659  | 0.000640704 | 0.001570914 | no |
| DNMT3A      | 0.128799164  | 3.428956318  | 0.000641569 | 0.001572844 | no |
| CYP4A11     | -0.12879225  | -3.428769132 | 0.000642004 | 0.00157372  | no |
| PACSL1      | -0.128790653 | -3.428725909 | 0.000642105 | 0.001573776 | no |
| SLC9A8      | 0.128759536  | 3.427883527  | 0.000644067 | 0.001578394 | no |
| MED28       | 0.128741304  | 3.427389967  | 0.000645219 | 0.001581026 | no |
| PRKX        | -0.128734583 | -3.427208029 | 0.000645645 | 0.001581876 | no |
| RAVER2      | -0.128719577 | -3.426801797 | 0.000646595 | 0.001584013 | no |
| GALNT8      | -0.128704377 | -3.426390336 | 0.000647559 | 0.001586183 | no |
| TRAF3IP1    | 0.128701786  | 3.426320177  | 0.000647724 | 0.001586393 | no |
| IL11        | 0.128695969  | 3.426162704  | 0.000648093 | 0.001587106 | no |
| OGFOD1      | 0.128675555  | 3.425610093  | 0.000649391 | 0.001590091 | no |
| MFSD3       | -0.128671574 | -3.425502328 | 0.000649644 | 0.001590519 | no |
| ATP6V1A     | -0.128654076 | -3.425028672 | 0.000650759 | 0.001593055 | no |
| SNORD115-13 | -0.128642178 | -3.424706575 | 0.000651518 | 0.00159472  | no |
| STX2        | 0.128624687  | 3.424233112  | 0.000652635 | 0.001597262 | no |

|           |              |              |             |             |    |
|-----------|--------------|--------------|-------------|-------------|----|
| PMP2      | 0.128607335  | 3.423763394  | 0.000653745 | 0.001599785 | no |
| ATP5F1    | 0.128594993  | 3.42342929   | 0.000654536 | 0.001601526 | no |
| LOC401127 | -0.12859182  | -3.423343417 | 0.000654739 | 0.00160183  | no |
| CCDC158   | 0.12858575   | 3.423179085  | 0.000655129 | 0.001602588 | no |
| PCMT1     | -0.128548755 | -3.422177679 | 0.000657506 | 0.001608209 | no |
| NRIP2     | -0.128542362 | -3.422004625 | 0.000657918 | 0.001609022 | no |
| CYP2A6    | -0.128531604 | -3.421713403 | 0.000658611 | 0.001610522 | no |
| TMEM132D  | -0.12851793  | -3.421343291 | 0.000659493 | 0.001612484 | no |
| USP35     | -0.128493187 | -3.420673517 | 0.000661092 | 0.001616199 | no |
| FOXD4L1   | -0.128488702 | -3.420552122 | 0.000661382 | 0.001616713 | no |
| ZNF85     | -0.128482675 | -3.420388973 | 0.000661773 | 0.001617471 | no |
| METTL6    | -0.128478512 | -3.420276292 | 0.000662042 | 0.001617934 | no |
| C18orf32  | -0.128476872 | -3.420231905 | 0.000662148 | 0.001617998 | no |
| IARS      | 0.128454085  | 3.419615095  | 0.000663626 | 0.001621414 | no |
| CLEC4G    | 0.128433474  | 3.419057204  | 0.000664966 | 0.00162449  | no |
| NSUN5     | 0.128402469  | 3.418217987  | 0.000666986 | 0.001629227 | no |
| MPND      | -0.128399941 | -3.418149561 | 0.00066715  | 0.001629433 | no |
| MATN3     | 0.128370357  | 3.417348785  | 0.000669083 | 0.001633957 | no |
| MGC16275  | -0.128351901 | -3.416849261 | 0.000670292 | 0.00163671  | no |
| SLC3A1    | -0.128342667 | -3.416599313 | 0.000670897 | 0.00163799  | no |
| DDX24     | -0.1283405   | -3.416540655 | 0.000671039 | 0.00163814  | no |
| KRTAP1-5  | 0.128328683  | 3.416220824  | 0.000671815 | 0.001639835 | no |
| PDXK      | -0.128326143 | -3.416152071 | 0.000671982 | 0.001640044 | no |
| TMEM84    | 0.128303263  | 3.415532778  | 0.000673486 | 0.001643517 | no |
| NEUROD1   | -0.128298282 | -3.415397954 | 0.000673814 | 0.001644119 | no |
| ALG5      | 0.128277264  | 3.414829084  | 0.000675199 | 0.001647191 | no |
| ATG4D     | -0.128276    | -3.414794886 | 0.000675283 | 0.001647191 | no |
| ACN9      | 0.128275476  | 3.414780696  | 0.000675317 | 0.001647191 | no |
| MRPS16    | -0.128268049 | -3.41457968  | 0.000675808 | 0.001648188 | no |
| PRKAA2    | -0.128259719 | -3.414354205 | 0.000676358 | 0.001649331 | no |
| NRM       | 0.128256007  | 3.414253752  | 0.000676603 | 0.00164973  | no |
| FXYP7     | -0.1282507   | -3.414110119 | 0.000676954 | 0.00165028  | no |
| ID4       | -0.128250131 | -3.414094721 | 0.000676992 | 0.00165028  | no |
| RPL13P5   | 0.128235138  | 3.413688913  | 0.000677984 | 0.001652499 | no |
| IRGM      | 0.128231285  | 3.413584619  | 0.000678239 | 0.001652922 | no |
| KLHL21    | 0.128222915  | 3.413358102  | 0.000678794 | 0.001654075 | no |
| TCF20     | -0.128213021 | -3.413090304 | 0.00067945  | 0.001655474 | no |
| AFAP1L2   | -0.128170432 | -3.411937635 | 0.000682282 | 0.001662173 | no |
| CTNNA1    | 0.128148874  | 3.41135417   | 0.00068372  | 0.001665475 | no |
| STH       | -0.128132086 | -3.4108998   | 0.000684841 | 0.001668006 | no |
| TNNI3K    | -0.12812729  | -3.410770011 | 0.000685162 | 0.001668586 | no |
| WASH2P    | -0.128121249 | -3.410606499 | 0.000685566 | 0.001669369 | no |
| LCNL1     | -0.128109329 | -3.410283907 | 0.000686364 | 0.001671111 | no |
| MST4      | 0.128086483  | 3.409665601  | 0.000687896 | 0.001674639 | no |
| SYTL5     | 0.128077171  | 3.409413564  | 0.000688521 | 0.00167596  | no |
| AKR1B10   | 0.12806037   | 3.408958875  | 0.000689651 | 0.001678507 | no |
| C10orf114 | 0.128053858  | 3.408782623  | 0.000690089 | 0.001679372 | no |
| LIMS3     | 0.128045896  | 3.408567145  | 0.000690625 | 0.001680475 | no |
| LDLRAP1   | 0.128022084  | 3.407922713  | 0.000692231 | 0.00168418  | no |
| OR10J3    | 0.128006505  | 3.407501104  | 0.000693284 | 0.001686538 | no |
| OR52K1    | 0.128003744  | 3.407426379  | 0.000693471 | 0.001686707 | no |

|           |              |              |             |             |    |
|-----------|--------------|--------------|-------------|-------------|----|
| ZNF774    | -0.128003008 | -3.40740647  | 0.00069352  | 0.001686707 | no |
| AKR1C4    | 0.127969976  | 3.406512506  | 0.000695758 | 0.001691945 | no |
| RBM26     | -0.127964263 | -3.406357911 | 0.000696146 | 0.001692684 | no |
| BCAS2     | 0.127955233  | 3.40611353   | 0.000696759 | 0.001693972 | no |
| C14orf167 | -0.127946756 | -3.40588412  | 0.000697335 | 0.001695168 | no |
| SLC32A1   | -0.127944799 | -3.405831167 | 0.000697468 | 0.001695288 | no |
| CD200     | -0.127912196 | -3.404948844 | 0.000699688 | 0.001700479 | no |
| PI4KA     | -0.127906245 | -3.404787804 | 0.000700094 | 0.001701067 | no |
| SFTPC     | -0.127906187 | -3.404786217 | 0.000700098 | 0.001701067 | no |
| THSD1     | 0.127896165  | 3.404515001  | 0.000700782 | 0.001702524 | no |
| OR2T35    | 0.127893959  | 3.404455311  | 0.000700932 | 0.001702686 | no |
| NAT10     | -0.127892074 | -3.404404306 | 0.000701061 | 0.001702794 | no |
| EFHB      | -0.127874056 | -3.403916685 | 0.000702293 | 0.001705581 | no |
| TRAPPC2P1 | 0.127872034  | 3.40386197   | 0.000702432 | 0.001705712 | no |
| ZCCHC8    | 0.127868869  | 3.403776327  | 0.000702648 | 0.001706034 | no |
| ARHGAP21  | -0.127848052 | -3.403212983 | 0.000704075 | 0.001709292 | no |
| ZNF496    | -0.127838909 | -3.402965574 | 0.000704702 | 0.001710609 | no |
| EXOC7     | -0.127818278 | -3.402407252 | 0.00070612  | 0.001713845 | no |
| CDC6      | 0.127677648  | 3.398601744  | 0.000715853 | 0.00173726  | no |
| FLJ45445  | 0.127675492  | 3.398543418  | 0.000716003 | 0.001737416 | no |
| SAMM50    | -0.127647753 | -3.397792789 | 0.000717938 | 0.001741902 | no |
| STRBP     | -0.127637351 | -3.397511324 | 0.000718665 | 0.001743456 | no |
| B4GALT7   | 0.127623914  | 3.397147734  | 0.000719605 | 0.001745432 | no |
| PNMA5     | -0.127623241 | -3.397129517 | 0.000719652 | 0.001745432 | no |
| ASAP3     | 0.127619807  | 3.397036607  | 0.000719892 | 0.001745806 | no |
| RPL23P8   | -0.127612427 | -3.396836907 | 0.000720409 | 0.00174685  | no |
| C9orf116  | 0.127581172  | 3.395991173  | 0.000722602 | 0.001751957 | no |
| CDC73     | 0.127571522  | 3.395730075  | 0.00072328  | 0.001753391 | no |
| EIF4G1    | 0.127560914  | 3.395443033  | 0.000724027 | 0.00175499  | no |
| RPS24     | -0.127555554 | -3.395298002 | 0.000724404 | 0.001755622 | no |
| GMEB2     | -0.127554146 | -3.395259885 | 0.000724503 | 0.001755622 | no |
| ADRBK2    | -0.127552946 | -3.395227421 | 0.000724588 | 0.001755622 | no |
| ARHGAP12  | -0.127552281 | -3.395209431 | 0.000724635 | 0.001755622 | no |
| REEP3     | 0.127524969  | 3.394470404  | 0.000726561 | 0.001760078 | no |
| CSNK1A1P  | 0.127496372  | 3.393696634  | 0.000728583 | 0.001764765 | no |
| COMMD7    | 0.12749201   | 3.393578604  | 0.000728892 | 0.001765302 | no |
| SHROOM1   | 0.127477728  | 3.39319217   | 0.000729904 | 0.001767541 | no |
| TTC14     | -0.127472109 | -3.393040143 | 0.000730303 | 0.001768295 | no |
| ACSBG1    | -0.12745609  | -3.392606709 | 0.00073144  | 0.001770837 | no |
| SC65      | 0.127443246  | 3.392259194  | 0.000732353 | 0.001772835 | no |
| SULT4A1   | -0.127431407 | -3.391938848 | 0.000733196 | 0.001774663 | no |
| SNRK      | -0.127417433 | -3.391560746 | 0.000734192 | 0.00177686  | no |
| PTPRQ     | 0.127389642  | 3.390808818  | 0.000736176 | 0.001781449 | no |
| DHRS7B    | 0.127387599  | 3.39075354   | 0.000736322 | 0.001781589 | no |
| PRH1      | -0.127386172 | -3.390714946 | 0.000736424 | 0.001781623 | no |
| RASA4     | -0.127371119 | -3.390307661 | 0.000737501 | 0.001784015 | no |
| WDR16     | 0.127368689  | 3.390241896  | 0.000737675 | 0.001784175 | no |
| RALGAPA2  | 0.12736773   | 3.390215964  | 0.000737744 | 0.001784175 | no |
| CCS       | -0.127340741 | -3.38948573  | 0.000739679 | 0.001788642 | no |
| HNRNPM    | -0.127318079 | -3.388872587 | 0.000741308 | 0.001792366 | no |
| LOC91316  | -0.127302869 | -3.388461067 | 0.000742403 | 0.001794799 | no |

|           |              |              |             |             |    |
|-----------|--------------|--------------|-------------|-------------|----|
| SYN2      | -0.127301267 | -3.388417717 | 0.000742518 | 0.001794864 | no |
| ARG2      | 0.127278217  | 3.387794102  | 0.000744181 | 0.001798667 | no |
| CCT7      | -0.127264567 | -3.387424772 | 0.000745167 | 0.001800836 | no |
| RBP3      | -0.127259349 | -3.387283615 | 0.000745545 | 0.001801532 | no |
| ORMDL3    | -0.127252718 | -3.387104216 | 0.000746024 | 0.001802476 | no |
| GALNTL1   | -0.127243119 | -3.386844514 | 0.000746719 | 0.001803939 | no |
| MRPL30    | -0.127223718 | -3.386319618 | 0.000748126 | 0.001807121 | no |
| RHOT2     | -0.127203423 | -3.385770533 | 0.0007496   | 0.001810465 | no |
| OR2A1     | 0.127181139  | 3.385167643  | 0.000751221 | 0.001814165 | no |
| SOHLH1    | -0.127169493 | -3.384852566 | 0.00075207  | 0.001815998 | no |
| RAN       | 0.127161999  | 3.384649837  | 0.000752616 | 0.0018171   | no |
| TCEB1     | 0.127157936  | 3.384539915  | 0.000752913 | 0.001817599 | no |
| ZNF761    | 0.127154246  | 3.384440085  | 0.000753182 | 0.001818032 | no |
| KRT73     | 0.12712119   | 3.383545772  | 0.000755599 | 0.001823649 | no |
| FAM195B   | -0.127117112 | -3.383435443 | 0.000755898 | 0.001824152 | no |
| NFIC      | 0.127110249  | 3.38324978   | 0.000756401 | 0.001825148 | no |
| KIAA1310  | 0.127086652  | 3.382611395  | 0.000758132 | 0.001829108 | no |
| LGR4      | 0.127080409  | 3.382442487  | 0.000758591 | 0.001829996 | no |
| RIMKLA    | -0.127016282 | -3.38070766  | 0.000763318 | 0.001841179 | no |
| INSIG1    | -0.12700807  | -3.380485512 | 0.000763925 | 0.001842424 | no |
| LEKR1     | 0.127001985  | 3.380320888  | 0.000764376 | 0.00184329  | no |
| SYT14     | -0.126984425 | -3.379845844 | 0.000765676 | 0.001846207 | no |
| TRIM50    | 0.126982992  | 3.379807076  | 0.000765783 | 0.001846243 | no |
| ST3GAL4   | 0.126980417  | 3.379737415  | 0.000765974 | 0.001846483 | no |
| SLC19A1   | -0.126949882 | -3.37891137  | 0.000768241 | 0.001851729 | no |
| TYRO3     | -0.126939348 | -3.378626413 | 0.000769025 | 0.001853397 | no |
| ADAMTS1   | 0.126893701  | 3.377391586  | 0.00077243  | 0.00186138  | no |
| YWHAZ     | 0.126869053  | 3.376724811  | 0.000774274 | 0.001865602 | no |
| SLITRK3   | -0.126843026 | -3.376020764 | 0.000776226 | 0.001870082 | no |
| TRABD     | 0.126825459  | 3.375545554  | 0.000777546 | 0.001873039 | no |
| HES4      | -0.126815037 | -3.375263647 | 0.00077833  | 0.00187451  | no |
| PABPC1L2A | -0.126814877 | -3.375259311 | 0.000778342 | 0.00187451  | no |
| MMD       | 0.126791054  | 3.374614889  | 0.000780137 | 0.001878609 | no |
| CTH       | -0.126778881 | -3.374285611 | 0.000781055 | 0.001880598 | no |
| TM7SF3    | 0.1267583    | 3.373728877  | 0.000782611 | 0.001884119 | no |
| C19orf73  | -0.126756685 | -3.373685204 | 0.000782733 | 0.001884188 | no |
| C9orf102  | -0.126752039 | -3.373559513 | 0.000783085 | 0.00188481  | no |
| NIPBL     | -0.126743577 | -3.373330611 | 0.000783726 | 0.001886128 | no |
| ZNF285    | -0.126733897 | -3.373068794 | 0.000784459 | 0.001887669 | no |
| RPLP0P2   | 0.126722742  | 3.37276705   | 0.000785305 | 0.00188948  | no |
| LAMB4     | 0.12671024   | 3.37242886   | 0.000786255 | 0.001891539 | no |
| NIN       | -0.126705424 | -3.372298597 | 0.000786621 | 0.001892195 | no |
| C10orf67  | 0.126704021  | 3.372260642  | 0.000786727 | 0.001892226 | no |
| GARS      | 0.126697997  | 3.372097689  | 0.000787185 | 0.001893073 | no |
| C17orf72  | 0.126696193  | 3.372048914  | 0.000787323 | 0.001893073 | no |
| SOX20T    | -0.126695699 | -3.372035547 | 0.00078736  | 0.001893073 | no |
| C1QTNF1   | 0.126692209  | 3.371941131  | 0.000787626 | 0.001893353 | no |
| NUFIP2    | 0.126691703  | 3.371927452  | 0.000787664 | 0.001893353 | no |
| SLPI      | 0.126678121  | 3.371560065  | 0.000788698 | 0.001895614 | no |
| ZNF514    | -0.126659166 | -3.371047362 | 0.000790144 | 0.001898863 | no |
| ADPRHL1   | -0.126640532 | -3.370543314 | 0.000791567 | 0.001902057 | no |

|              |              |              |             |             |    |
|--------------|--------------|--------------|-------------|-------------|----|
| KCNJ4        | -0.126633833 | -3.370362122 | 0.00079208  | 0.001903062 | no |
| TPTE2        | -0.126561757 | -3.368412592 | 0.000797611 | 0.001916125 | no |
| C16orf42     | -0.126550067 | -3.368096382 | 0.000798512 | 0.00191806  | no |
| SLC6A17      | -0.126548505 | -3.368054143 | 0.000798632 | 0.001918121 | no |
| ZNF646       | -0.126529281 | -3.367534177 | 0.000800115 | 0.001921455 | no |
| SFN          | 0.126502649  | 3.366813855  | 0.000802174 | 0.001926171 | no |
| SETD2        | -0.126478764 | -3.366167821 | 0.000804025 | 0.001930386 | no |
| COL6A6       | 0.126438748  | 3.365085506  | 0.000807134 | 0.001937621 | no |
| PPP2R2A      | 0.126402176  | 3.364096372  | 0.000809986 | 0.001944236 | no |
| NAT9         | -0.126374115 | -3.363337416 | 0.00081218  | 0.001949271 | no |
| SAA2         | 0.126348868  | 3.362654591  | 0.000814159 | 0.001953789 | no |
| MED16        | -0.126343461 | -3.36250836  | 0.000814584 | 0.001954575 | no |
| LOC100134259 | 0.126309567  | 3.361591666  | 0.000817249 | 0.001960537 | no |
| THOC5        | 0.126309395  | 3.361587028  | 0.000817262 | 0.001960537 | no |
| ELF2         | 0.126282882  | 3.360869972  | 0.000819353 | 0.001965319 | no |
| C19orf25     | -0.126270636 | -3.360538782 | 0.00082032  | 0.001967405 | no |
| KDM5C        | -0.126260335 | -3.360260181 | 0.000821134 | 0.001969125 | no |
| CBX6         | -0.126258473 | -3.36020983  | 0.000821281 | 0.001969212 | no |
| SLED1        | 0.126257413  | 3.36018116   | 0.000821365 | 0.001969212 | no |
| EFHD1        | -0.126248923 | -3.359951559 | 0.000822037 | 0.001970463 | no |
| KIAA1462     | -0.126248358 | -3.359936273 | 0.000822082 | 0.001970463 | no |
| HEATR6       | -0.126222707 | -3.359242553 | 0.000824115 | 0.001975102 | no |
| APEX1        | -0.126189437 | -3.358342786 | 0.000826759 | 0.001981205 | no |
| LOC646982    | 0.12616428   | 3.357662442  | 0.000828764 | 0.001985773 | no |
| NOB1         | -0.1261298   | -3.356729974 | 0.000831519 | 0.001992138 | no |
| HSCB         | 0.126071148  | 3.355143825  | 0.000836225 | 0.002003174 | no |
| GIYD2        | 0.126067335  | 3.355040702  | 0.000836531 | 0.002003671 | no |
| SKP2         | 0.126062622  | 3.354913249  | 0.000836911 | 0.002004343 | no |
| DOT1L        | -0.126055095 | -3.35470971  | 0.000837517 | 0.002005557 | no |
| 7-Mar        | 0.126052729  | 3.354645718  | 0.000837707 | 0.002005775 | no |
| NUDCD1       | 0.126030069  | 3.354032928  | 0.000839535 | 0.002009913 | no |
| N6AMT2       | 0.126015433  | 3.35363715   | 0.000840717 | 0.002012506 | no |
| NFATC4       | 0.125975128  | 3.35254722   | 0.000843981 | 0.00202008  | no |
| POM121L1P    | 0.125959147  | 3.352115054  | 0.000845279 | 0.002022946 | no |
| NDUFC2       | -0.125944363 | -3.351715282 | 0.000846481 | 0.002025582 | no |
| AMAC1L3      | -0.125908234 | -3.350738302 | 0.000849425 | 0.002032386 | no |
| AFG3L2       | -0.125875364 | -3.349849465 | 0.000852111 | 0.002038573 | no |
| CNR1         | 0.125872991  | 3.349785283  | 0.000852305 | 0.002038797 | no |
| SRD5A1       | 0.125828572  | 3.348584168  | 0.000855949 | 0.002047271 | no |
| MGC45800     | 0.125822714  | 3.348425761  | 0.000856431 | 0.00204818  | no |
| KIAA0831     | -0.125820492 | -3.348365689 | 0.000856613 | 0.002048375 | no |
| LOC256880    | -0.125811391 | -3.348119599 | 0.000857362 | 0.002049923 | no |
| HSPB7        | 0.125800754  | 3.34783197   | 0.000858238 | 0.002051754 | no |
| TOMM70A      | -0.125799632 | -3.347801623 | 0.000858331 | 0.002051754 | no |
| AGR3         | 0.125772586  | 3.347070315  | 0.000860562 | 0.002056844 | no |
| DNAJC11      | -0.125734589 | -3.346042873 | 0.000863706 | 0.002064115 | no |
| PVRL4        | 0.125659381  | 3.344009318  | 0.00086996  | 0.002078816 | no |
| TSSK3        | -0.125657554 | -3.343959934 | 0.000870113 | 0.002078934 | no |
| NFE2L1       | 0.125644364  | 3.343603277  | 0.000871214 | 0.00208132  | no |
| C12orf49     | 0.125640923  | 3.343510251  | 0.000871502 | 0.002081761 | no |
| CXCL5        | 0.125626712  | 3.343126005  | 0.00087269  | 0.002084353 | no |

|              |              |              |             |             |    |
|--------------|--------------|--------------|-------------|-------------|----|
| C20orf195    | 0.125620794  | 3.342965985  | 0.000873186 | 0.00208529  | no |
| ROPN1L       | 0.125602131  | 3.342461383  | 0.000874749 | 0.002088778 | no |
| LAMB3        | 0.125588053  | 3.342080734  | 0.000875931 | 0.002091352 | no |
| RBM25        | -0.125565297 | -3.341465459 | 0.000877843 | 0.002095671 | no |
| LOC285627    | 0.12554862   | 3.341014563  | 0.000879248 | 0.002098775 | no |
| TMEM195      | 0.125546114  | 3.340946815  | 0.000879459 | 0.002099031 | no |
| ICAM5        | -0.12554432  | -3.340898307 | 0.00087961  | 0.002099145 | no |
| FAM131C      | -0.125506316 | -3.339870776 | 0.000882819 | 0.002106554 | no |
| LPIN1        | -0.125484476 | -3.339280282 | 0.000884668 | 0.002110717 | no |
| GALNTL6      | -0.125458769 | -3.338585247 | 0.000886849 | 0.00211567  | no |
| ZSCAN21      | -0.125448768 | -3.33831487  | 0.000887698 | 0.002117448 | no |
| MAGI3        | -0.125424773 | -3.337666127 | 0.00088974  | 0.002122068 | no |
| PACSIN2      | 0.125415247  | 3.337408574  | 0.000890552 | 0.002123604 | no |
| LYPD6        | 0.125414752  | 3.337395199  | 0.000890595 | 0.002123604 | no |
| KIF18A       | 0.125361391  | 3.335952547  | 0.000895155 | 0.00213402  | no |
| OIT3         | 0.125361172  | 3.335946628  | 0.000895174 | 0.00213402  | no |
| XIAP         | -0.125352628 | -3.335715626 | 0.000895906 | 0.002135453 | no |
| CA12         | 0.125350943  | 3.335670062  | 0.000896051 | 0.002135453 | no |
| KIAA1671     | -0.125350462 | -3.335657071 | 0.000896092 | 0.002135453 | no |
| RGN          | 0.125335416  | 3.335250304  | 0.000897383 | 0.002138278 | no |
| BCAM         | 0.125313732  | 3.334664079  | 0.000899247 | 0.002142466 | no |
| SPSB2        | 0.125302862  | 3.334370191  | 0.000900182 | 0.002144443 | no |
| TBC1D3       | -0.125299739 | -3.334285771 | 0.000900451 | 0.002144831 | no |
| PDCD11       | -0.125291556 | -3.334064534 | 0.000901156 | 0.002146258 | no |
| CBFA2T3      | -0.125199361 | -3.331572097 | 0.000909136 | 0.002165008 | no |
| CCDC90B      | 0.125194392  | 3.331437777  | 0.000909568 | 0.002165663 | no |
| FADS3        | 0.125193733  | 3.331419967  | 0.000909625 | 0.002165663 | no |
| PPP4C        | 0.125186819  | 3.331233059  | 0.000910227 | 0.002166839 | no |
| ZNF90        | 0.125158027  | 3.330454685  | 0.000912735 | 0.002172554 | no |
| OSR1         | 0.125121908  | 3.329478289  | 0.00091589  | 0.002179809 | no |
| SDC4         | 0.125115712  | 3.329310778  | 0.000916433 | 0.002180843 | no |
| CDC123       | -0.125112451 | -3.329222639 | 0.000916718 | 0.002181265 | no |
| LOC100130691 | -0.125101235 | -3.328919437 | 0.000917701 | 0.002183347 | no |
| FAM189A2     | -0.125056677 | -3.327714919 | 0.000921615 | 0.0021924   | no |
| UNG          | 0.125044288  | 3.327379994  | 0.000922706 | 0.002194737 | no |
| ZNF727       | -0.125033959 | -3.327100781 | 0.000923616 | 0.002196645 | no |
| PCSK1        | 0.12499295   | 3.325992244  | 0.000927239 | 0.002205002 | no |
| SEC11C       | 0.124983606  | 3.32573966   | 0.000928067 | 0.002206653 | no |
| SPAG17       | 0.124982643  | 3.325713622  | 0.000928152 | 0.002206653 | no |
| MESP1        | -0.124973331 | -3.325461909 | 0.000928977 | 0.002208355 | no |
| C21orf122    | 0.124950233  | 3.32483753   | 0.000931027 | 0.002212968 | no |
| TTC21B       | -0.124947194 | -3.324755379 | 0.000931297 | 0.00221335  | no |
| PBLD         | -0.124934555 | -3.324413737 | 0.000932421 | 0.00221576  | no |
| MPDZ         | -0.124929054 | -3.324265029 | 0.00093291  | 0.002216607 | no |
| LRBA         | 0.124928083  | 3.324238796  | 0.000932997 | 0.002216607 | no |
| PPM1J        | 0.124919055  | 3.323994762  | 0.000933801 | 0.002218257 | no |
| RHPN1        | -0.124912676 | -3.323822315 | 0.000934369 | 0.002219346 | no |
| SET          | -0.124894738 | -3.32333744  | 0.000935969 | 0.002222787 | no |
| ZNF207       | 0.124893974  | 3.323316796  | 0.000936038 | 0.002222787 | no |
| MMP15        | -0.124869634 | -3.322658871 | 0.000938213 | 0.002227691 | no |
| PDE1C        | 0.124849611  | 3.322117637  | 0.000940006 | 0.002231687 | no |



|              |              |              |             |             |    |
|--------------|--------------|--------------|-------------|-------------|----|
| PI3          | 0.12482338   | 3.321408595  | 0.00094236  | 0.002237012 | no |
| C11orf16     | 0.124807625  | 3.320982745  | 0.000943776 | 0.002240112 | no |
| LANCL1       | -0.124800219 | -3.320782567 | 0.000944443 | 0.00224143  | no |
| LOC100288778 | -0.124788657 | -3.320470046 | 0.000945484 | 0.002243639 | no |
| TNRC6A       | -0.124783247 | -3.32032383  | 0.000945972 | 0.002244532 | no |
| PIK3CB       | -0.124773751 | -3.320067147 | 0.000946828 | 0.002246301 | no |
| ISPD         | -0.124766896 | -3.31988186  | 0.000947447 | 0.002247505 | no |
| HSD17B3      | 0.124750309  | 3.31943353   | 0.000948946 | 0.002250796 | no |
| WSB2         | -0.12474214  | -3.31921272  | 0.000949685 | 0.002252285 | no |
| LOC415056    | -0.124732668 | -3.318956688 | 0.000950542 | 0.002254054 | no |
| CORO6        | -0.124722009 | -3.318668609 | 0.000951508 | 0.002256079 | no |
| HIP1         | -0.124703513 | -3.318168678 | 0.000953186 | 0.002259792 | no |
| ZNF804B      | -0.124689949 | -3.317802065 | 0.000954418 | 0.002262449 | no |
| HIST1H1C     | 0.12466685   | 3.317177722  | 0.00095652  | 0.002267165 | no |
| SKI          | 0.124633593  | 3.316278832  | 0.000959554 | 0.002274089 | no |
| SEL1L3       | 0.124611235  | 3.315674548  | 0.000961598 | 0.002278667 | no |
| SNHG4        | 0.124581049  | 3.314858704  | 0.000964365 | 0.002284956 | no |
| POFUT2       | 0.12457324   | 3.31464764   | 0.000965082 | 0.002286386 | no |
| CPXM1        | 0.124564862  | 3.314421193  | 0.000965851 | 0.002287942 | no |
| CCDC96       | 0.124561683  | 3.314335279  | 0.000966144 | 0.002288226 | no |
| UGT2B11      | 0.124561094  | 3.314319371  | 0.000966198 | 0.002288226 | no |
| TRIM59       | 0.124546653  | 3.313929052  | 0.000967526 | 0.002290905 | no |
| MS4A6E       | 0.124546336  | 3.3139205    | 0.000967555 | 0.002290905 | no |
| TMEM135      | -0.124532244 | -3.313539631 | 0.000968854 | 0.00229371  | no |
| ATP11A       | 0.124503331  | 3.312758202  | 0.000971522 | 0.002299758 | no |
| NOV          | 0.124473724  | 3.311958031  | 0.000974261 | 0.002305972 | no |
| UMPS         | 0.124462144  | 3.311645072  | 0.000975335 | 0.002308242 | no |
| LOC92659     | -0.124459801 | -3.311581737 | 0.000975552 | 0.002308487 | no |
| GABRG1       | -0.12444721  | -3.311241447 | 0.000976721 | 0.002310981 | no |
| HTR5A        | -0.124436434 | -3.310950209 | 0.000977722 | 0.00231308  | no |
| HMCN1        | 0.124417257  | 3.310431945  | 0.000979506 | 0.002317029 | no |
| CALY         | -0.124415576 | -3.310386502 | 0.000979662 | 0.002317128 | no |
| SCML1        | 0.124400389  | 3.309976073  | 0.000981077 | 0.002320204 | no |
| HSPB9        | -0.124388547 | -3.309656023 | 0.000982182 | 0.002322545 | no |
| GORAB        | 0.124380861  | 3.309448322  | 0.0009829   | 0.00232397  | no |
| PPRC1        | -0.1243778   | -3.309365576 | 0.000983186 | 0.002324375 | no |
| USP31        | -0.124298951 | -3.307234703 | 0.000990578 | 0.002341577 | no |
| WSB1         | -0.12428303  | -3.306804447 | 0.000992077 | 0.002344846 | no |
| TUFM         | -0.1242773   | -3.30664958  | 0.000992617 | 0.002345848 | no |
| VCAN         | -0.124210469 | -3.304843536 | 0.000998935 | 0.002360503 | no |
| TESK1        | -0.124205462 | -3.304708229 | 0.00099941  | 0.002361349 | no |
| MPO          | 0.124181101  | 3.304049897  | 0.001001723 | 0.002366538 | no |
| GORASP1      | -0.124172061 | -3.303805615 | 0.001002583 | 0.002368293 | no |
| NCRNA00164   | -0.124166796 | -3.303663327 | 0.001003084 | 0.002369199 | no |
| RNF34        | 0.124142704  | 3.303012289  | 0.001005379 | 0.002374343 | no |
| CCBL2        | 0.12412912   | 3.302645218  | 0.001006675 | 0.002377127 | no |
| SURF2        | -0.124120392 | -3.30240935  | 0.001007509 | 0.002378818 | no |
| ZNF648       | 0.124094161  | 3.301700523  | 0.001010019 | 0.002384465 | no |
| C19orf36     | -0.12408757  | -3.301522432 | 0.00101065  | 0.002385677 | no |
| EIF3C        | -0.124078661 | -3.301281695 | 0.001011504 | 0.002387415 | no |
| POT1         | 0.124077231  | 3.301243029  | 0.001011642 | 0.00238746  | no |

|           |              |              |             |             |    |
|-----------|--------------|--------------|-------------|-------------|----|
| MTUS2     | -0.124069268 | -3.301027859 | 0.001012406 | 0.002388984 | no |
| GLIPR2    | 0.124007182  | 3.299350175  | 0.001018382 | 0.002402613 | no |
| PIAS4     | -0.124006795 | -3.299339712 | 0.001018419 | 0.002402613 | no |
| IFI44L    | 0.124003957  | 3.299263038  | 0.001018693 | 0.002402979 | no |
| TOP1P2    | -0.123999708 | -3.299148215 | 0.001019103 | 0.002403419 | no |
| ATP6V1B1  | -0.123999564 | -3.299144317 | 0.001019117 | 0.002403419 | no |
| UBE2H     | 0.123994199  | 3.298999362  | 0.001019635 | 0.002404361 | no |
| CD99L2    | -0.123988478 | -3.298844771 | 0.001020188 | 0.002405384 | no |
| THG1L     | 0.123986899  | 3.2988021    | 0.001020341 | 0.002405464 | no |
| WWP1      | 0.123984889  | 3.298747796  | 0.001020535 | 0.0024055   | no |
| IKBKAP    | -0.123984277 | -3.298731253 | 0.001020595 | 0.0024055   | no |
| ENTPD6    | -0.123971496 | -3.298385879 | 0.001021831 | 0.002408135 | no |
| DPY30     | 0.123961759  | 3.298122777  | 0.001022774 | 0.002410076 | no |
| KIF13B    | 0.123940504  | 3.297548456  | 0.001024836 | 0.002414653 | no |
| CRYGA     | -0.123938158 | -3.297485055 | 0.001025064 | 0.002414908 | no |
| CEP120    | 0.123934775  | 3.297393655  | 0.001025392 | 0.0024154   | no |
| ERVFRDE1  | 0.123929821  | 3.297259775  | 0.001025874 | 0.002416253 | no |
| RAB11A    | 0.123927988  | 3.297210259  | 0.001026052 | 0.002416391 | no |
| SYT5      | -0.123915029 | -3.296860083 | 0.001027312 | 0.002419077 | no |
| DYNC1I1   | -0.123906972 | -3.296642388 | 0.001028096 | 0.002420641 | no |
| COL11A2   | -0.12389834  | -3.296409144 | 0.001028937 | 0.002422339 | no |
| PLA2G16   | 0.123881667  | 3.295958638  | 0.001030563 | 0.002425884 | no |
| DYDC2     | 0.123868005  | 3.295589492  | 0.001031897 | 0.002428532 | no |
| DOLK      | 0.123867682  | 3.295580764  | 0.001031928 | 0.002428532 | no |
| LOC283663 | 0.123858133  | 3.295322727  | 0.001032862 | 0.002430446 | no |
| SPCS1     | 0.123849757  | 3.295096419  | 0.001033681 | 0.002432091 | no |
| PHYHIP    | -0.123830644 | -3.294579994 | 0.001035553 | 0.002436212 | no |
| TEL02     | -0.123817919 | -3.294236172 | 0.001036801 | 0.002438864 | no |
| MTHFD2    | -0.123811304 | -3.294057417 | 0.00103745  | 0.002440107 | no |
| MANSC1    | 0.123788156  | 3.29343198   | 0.001039725 | 0.002445174 | no |
| ZBTB10    | -0.123782203 | -3.293271126 | 0.001040311 | 0.002446267 | no |
| KIAA1045  | -0.123777011 | -3.293130846 | 0.001040822 | 0.002447184 | no |
| PRSS35    | -0.123722046 | -3.291645743 | 0.001046248 | 0.002459656 | no |
| SPINK1    | 0.12369583   | 3.290937417  | 0.001048845 | 0.002465475 | no |
| RALGDS    | -0.123677372 | -3.290438715 | 0.001050677 | 0.002469494 | no |
| FAM69A    | -0.12366381  | -3.290072297 | 0.001052025 | 0.002472375 | no |
| SYT7      | -0.123657145 | -3.289892222 | 0.001052688 | 0.002473646 | no |
| SMAD6     | 0.123631673  | 3.289204027  | 0.001055226 | 0.00247906  | no |
| GLS2      | -0.123631555 | -3.289200833 | 0.001055238 | 0.00247906  | no |
| DTYMK     | 0.123618149  | 3.288838632  | 0.001056575 | 0.002481691 | no |
| NEUROD2   | -0.123617875 | -3.288831235 | 0.001056603 | 0.002481691 | no |
| PRKAR2A   | 0.123612837  | 3.288695102  | 0.001057106 | 0.002482584 | no |
| ZNF491    | -0.123605662 | -3.28850125  | 0.001057823 | 0.00248398  | no |
| ARHGEF18  | -0.123586941 | -3.287995477 | 0.001059696 | 0.002488088 | no |
| PURA      | -0.123559382 | -3.287250903 | 0.001062459 | 0.002494285 | no |
| DYNLL1    | 0.123554351  | 3.287114973  | 0.001062964 | 0.002495181 | no |
| SYNPO     | 0.123544274  | 3.286842732  | 0.001063976 | 0.002497268 | no |
| MGC72080  | 0.123529343  | 3.286439348  | 0.001065477 | 0.002500502 | no |
| RBM8A     | -0.123508287 | -3.285870484 | 0.001067598 | 0.002505188 | no |
| TMEM178   | -0.123475533 | -3.284985584 | 0.001070905 | 0.002512656 | no |
| KCNK12    | -0.123456973 | -3.284484161 | 0.001072783 | 0.00251672  | no |

|           |              |              |             |             |    |
|-----------|--------------|--------------|-------------|-------------|----|
| PIGX      | -0.123455954 | -3.284456623 | 0.001072886 | 0.00251672  | no |
| TSPAN10   | 0.12344982   | 3.28429092   | 0.001073508 | 0.002517886 | no |
| MRPS5     | -0.123440182 | -3.284030533 | 0.001074485 | 0.002519885 | no |
| C20orf112 | -0.123408905 | -3.283185568 | 0.001077661 | 0.002527041 | no |
| RDH11     | -0.123389427 | -3.282659364 | 0.001079643 | 0.002531396 | no |
| DNAH6     | 0.123367793  | 3.282074914  | 0.001081849 | 0.002536274 | no |
| HDC       | 0.12335084   | 3.281616916  | 0.001083581 | 0.002539893 | no |
| NOMO1     | -0.123350219 | -3.281600138 | 0.001083644 | 0.002539893 | no |
| LOC728875 | 0.123348137  | 3.281543891  | 0.001083857 | 0.002540097 | no |
| XKR9      | 0.123343588  | 3.281421023  | 0.001084322 | 0.002540893 | no |
| CLCC1     | 0.123337397  | 3.281253757  | 0.001084955 | 0.002542082 | no |
| CELF1     | -0.123329944 | -3.281052415 | 0.001085718 | 0.002543575 | no |
| SRCRB4D   | 0.123320983  | 3.28081034   | 0.001086636 | 0.00254543  | no |
| PABPC1L2B | -0.123309567 | -3.280501948 | 0.001087806 | 0.002547877 | no |
| LOC283332 | -0.123292495 | -3.280040764 | 0.001089559 | 0.002551686 | no |
| GSC       | 0.123272541  | 3.279501702  | 0.001091611 | 0.002556194 | no |
| ACR       | -0.123262174 | -3.279221645 | 0.001092678 | 0.002558397 | no |
| TADA1     | -0.123248004 | -3.278838876 | 0.001094138 | 0.00256152  | no |
| TCF23     | 0.123202861  | 3.277619377  | 0.001098803 | 0.002572143 | no |
| TEX264    | 0.123149113  | 3.276167494  | 0.00110438  | 0.0025849   | no |
| GUSBL1    | -0.123110627 | -3.275127856 | 0.00110839  | 0.002593985 | no |
| FREM1     | 0.123051378  | 3.273527418  | 0.00111459  | 0.002608192 | no |
| ATP2A2    | -0.123032312 | -3.273012402 | 0.001116591 | 0.002612573 | no |
| INSL5     | 0.123027101  | 3.272871659  | 0.001117139 | 0.002613552 | no |
| HSPC072   | -0.12298685  | -3.271784406 | 0.001121378 | 0.002623165 | no |
| SRI       | -0.122973879 | -3.271434056 | 0.001122747 | 0.002625841 | no |
| XP07      | -0.122973551 | -3.271425185 | 0.001122782 | 0.002625841 | no |
| RGAG4     | -0.122955378 | -3.270934327 | 0.001124702 | 0.002630029 | no |
| GOLGA6B   | -0.122947504 | -3.270721645 | 0.001125536 | 0.002631673 | no |
| NXF4      | -0.122941348 | -3.270555347 | 0.001126188 | 0.002632893 | no |
| C3orf54   | 0.122938305  | 3.270473157  | 0.00112651  | 0.002633342 | no |
| CXorf26   | 0.122932852  | 3.270325881  | 0.001127088 | 0.002634388 | no |
| SLC35F3   | -0.122929729 | -3.270241515 | 0.001127419 | 0.002634857 | no |
| UBXN8     | 0.122873703  | 3.268728242  | 0.001133373 | 0.002648466 | no |
| TUBA1B    | 0.122855293  | 3.268230983  | 0.001135336 | 0.002652746 | no |
| KIAA0101  | 0.122816768  | 3.267190437  | 0.001139453 | 0.00266206  | no |
| UGT8      | -0.122776724 | -3.266108873 | 0.001143748 | 0.002671784 | no |
| ZFYVE21   | -0.122766289 | -3.265827014 | 0.001144869 | 0.002674095 | no |
| PPP1R7    | -0.122761489 | -3.265697379 | 0.001145386 | 0.002674992 | no |
| AKAP5     | -0.122735764 | -3.265002575 | 0.001148156 | 0.002681152 | no |
| ABCG4     | -0.122708883 | -3.264276567 | 0.001151057 | 0.002687618 | no |
| FANK1     | 0.122692279  | 3.263828117  | 0.001152853 | 0.002691499 | no |
| JKAMP     | 0.122684499  | 3.263617978  | 0.001153695 | 0.002693155 | no |
| ANGPT4    | -0.122672063 | -3.263282119 | 0.001155043 | 0.002695818 | no |
| CXorf22   | 0.12267151   | 3.263267176  | 0.001155103 | 0.002695818 | no |
| SEC13     | 0.122668614  | 3.263188954  | 0.001155417 | 0.002696239 | no |
| CYTL1     | 0.122659224  | 3.262935352  | 0.001156435 | 0.00269811  | no |
| BFSP1     | 0.122658765  | 3.262922965  | 0.001156485 | 0.00269811  | no |
| LOC144486 | -0.122643455 | -3.262509472 | 0.001158148 | 0.002701677 | no |
| FAM71F1   | 0.122631675  | 3.262191314  | 0.001159429 | 0.002704353 | no |
| LOC652276 | -0.12261359  | -3.261702883 | 0.001161398 | 0.002708633 | no |

|              |              |              |             |             |    |
|--------------|--------------|--------------|-------------|-------------|----|
| MED12L       | -0.122608722 | -3.261571412 | 0.001161928 | 0.002709558 | no |
| TNP01        | 0.122594555  | 3.261188806  | 0.001163474 | 0.002712849 | no |
| NMB          | -0.122579165 | -3.260773172 | 0.001165154 | 0.002716454 | no |
| SAA1         | 0.122562079  | 3.260311709  | 0.001167023 | 0.002720497 | no |
| AMIG01       | -0.122556954 | -3.260173301 | 0.001167584 | 0.002721491 | no |
| DOCK4        | 0.122553177  | 3.260071288  | 0.001167998 | 0.002722142 | no |
| GYG2         | 0.122551896  | 3.260036694  | 0.001168138 | 0.002722155 | no |
| TRERF1       | -0.122537747 | -3.25965459  | 0.001169689 | 0.002725264 | no |
| INPP5J       | -0.122537263 | -3.259641527 | 0.001169742 | 0.002725264 | no |
| SOX18        | 0.122534801  | 3.25957503   | 0.001170012 | 0.002725579 | no |
| SYNE2        | -0.122533032 | -3.259527247 | 0.001170206 | 0.002725718 | no |
| C16orf88     | -0.122513939 | -3.259011617 | 0.001172303 | 0.002730287 | no |
| SELO         | -0.122483314 | -3.258184548 | 0.001175673 | 0.002737617 | no |
| SNRPD2       | 0.12248288   | 3.258172822  | 0.001175721 | 0.002737617 | no |
| KCNH3        | -0.12247713  | -3.258017548 | 0.001176355 | 0.002738636 | no |
| DBP          | -0.122476452 | -3.257999239 | 0.001176429 | 0.002738636 | no |
| LOC100129726 | -0.122473502 | -3.257919558 | 0.001176755 | 0.002739078 | no |
| C2orf73      | 0.122463856  | 3.257659059  | 0.001177819 | 0.002741239 | no |
| HIST4H4      | 0.122460963  | 3.257580934  | 0.001178138 | 0.002741667 | no |
| ZNF844       | -0.122399394 | -3.255918228 | 0.001184954 | 0.002757211 | no |
| LOC389458    | -0.122389368 | -3.255647468 | 0.001186068 | 0.002759484 | no |
| SCRIB        | -0.122382103 | -3.255451257 | 0.001186875 | 0.002761044 | no |
| DNAJB1       | 0.12236938   | 3.25510767   | 0.00118829  | 0.002764018 | no |
| RPRD1B       | 0.122365765  | 3.25501007   | 0.001188692 | 0.002764636 | no |
| HEATR1       | 0.12236452   | 3.254976443  | 0.001188831 | 0.00276464  | no |
| RYR1         | -0.122347802 | -3.254524963 | 0.001190694 | 0.002768399 | no |
| AQP11        | -0.122347556 | -3.254518323 | 0.001190721 | 0.002768399 | no |
| RNF41        | -0.122331553 | -3.254086184 | 0.001192506 | 0.002772231 | no |
| ABCG8        | -0.122308882 | -3.253473937 | 0.00119504  | 0.002777802 | no |
| PPARA        | -0.122300465 | -3.253246646 | 0.001195982 | 0.002779672 | no |
| SYT9         | -0.12229457  | -3.253087472 | 0.001196642 | 0.002780886 | no |
| CDCA2        | 0.12228958   | 3.252952714  | 0.001197201 | 0.002781865 | no |
| TTC29        | 0.122276568  | 3.252601324  | 0.00119866  | 0.002784935 | no |
| ZNF99        | -0.12227292  | -3.252502833 | 0.001199069 | 0.002785566 | no |
| FAM90A7      | 0.122259097  | 3.252129547  | 0.001200621 | 0.002788794 | no |
| HCN1         | -0.122258087 | -3.252102272 | 0.001200735 | 0.002788794 | no |
| C16orf79     | -0.122252279 | -3.251945423 | 0.001201388 | 0.00278999  | no |
| MTUS1        | 0.122236131  | 3.251509389  | 0.001203204 | 0.002793888 | no |
| CYP8B1       | 0.12222252   | 3.25114183   | 0.001204737 | 0.002797126 | no |
| CHTF18       | -0.122211756 | -3.250851159 | 0.001205951 | 0.002799623 | no |
| SYT1         | -0.122192598 | -3.250333829 | 0.001208114 | 0.002804322 | no |
| UTP3         | 0.122182171  | 3.250052282  | 0.001209293 | 0.002806736 | no |
| LOC646214    | -0.122147604 | -3.249118847 | 0.001213208 | 0.0028155   | no |
| NELL1        | -0.122145396 | -3.249059238 | 0.001213458 | 0.002815758 | no |
| ANKFY1       | -0.122126364 | -3.248545331 | 0.001215619 | 0.002820449 | no |
| MPPED1       | -0.122114723 | -3.248230981 | 0.001216943 | 0.002823196 | no |
| CDC34        | -0.122099961 | -3.247832369 | 0.001218623 | 0.00282677  | no |
| PSMD4        | -0.122095771 | -3.247719236 | 0.001219101 | 0.002827552 | no |
| FAM154A      | 0.122081309  | 3.247328719  | 0.001220749 | 0.002831052 | no |
| PGD          | 0.122039818  | 3.2462084    | 0.001225491 | 0.002841723 | no |
| SCAF1        | -0.122015482 | -3.245551266 | 0.001228281 | 0.002847864 | no |

|              |              |              |             |             |    |
|--------------|--------------|--------------|-------------|-------------|----|
| HSD17B7      | 0.122008489  | 3.245362458  | 0.001229083 | 0.002849398 | no |
| LOC341056    | -0.121996754 | -3.245045601 | 0.001230431 | 0.002852196 | no |
| NCRNA00188   | -0.121994684 | -3.244989699 | 0.001230669 | 0.00285242  | no |
| B4GALT6      | -0.12199011  | -3.244866203 | 0.001231195 | 0.002853312 | no |
| CYP3A43      | -0.121973377 | -3.244414403 | 0.00123312  | 0.002857446 | no |
| GUSBP3       | 0.121951702  | 3.243829151  | 0.001235618 | 0.002862907 | no |
| TSSC4        | -0.121940368 | -3.243523112 | 0.001236926 | 0.002865492 | no |
| SERBP1       | 0.121939582  | 3.243501881  | 0.001237017 | 0.002865492 | no |
| EMID1        | 0.121924187  | 3.243086207  | 0.001238796 | 0.002869284 | no |
| HERC2P2      | -0.121917676 | -3.242910428 | 0.001239549 | 0.0028707   | no |
| ZC3H13       | -0.12188289  | -3.24197118  | 0.00124358  | 0.002879705 | no |
| LOC647309    | 0.121838946  | 3.24078471   | 0.001248689 | 0.002891205 | no |
| FAM135B      | -0.121806057 | -3.239896697 | 0.001252526 | 0.002899756 | no |
| DCP2         | 0.121797099  | 3.23965484   | 0.001253573 | 0.002901847 | no |
| TMC6         | 0.121789756  | 3.239456583  | 0.001254432 | 0.00290334  | no |
| SGCE         | 0.121789131  | 3.239439719  | 0.001254505 | 0.00290334  | no |
| TMEM181      | -0.121735039 | -3.237979301 | 0.001260847 | 0.002917685 | no |
| CCDC115      | -0.121690277 | -3.2367708   | 0.001266118 | 0.002929547 | no |
| LOC100132215 | 0.121686455  | 3.236667607  | 0.00126657  | 0.002930255 | no |
| CHST9        | -0.121644923 | -3.235546323 | 0.00127148  | 0.00294128  | no |
| LPIN2        | 0.121624512  | 3.234995267  | 0.0012739   | 0.00294654  | no |
| SLC4A11      | 0.121619562  | 3.234861631  | 0.001274487 | 0.002947561 | no |
| TM4SF19      | 0.121601061  | 3.234362144  | 0.001276685 | 0.002952307 | no |
| CRYZL1       | -0.121586121 | -3.233958811 | 0.001278462 | 0.002956079 | no |
| SHISA9       | -0.12157601  | -3.233685851 | 0.001279667 | 0.002958525 | no |
| BAIAP2       | -0.121563446 | -3.233346652 | 0.001281164 | 0.002961649 | no |
| TRMT61A      | -0.121537885 | -3.232656579 | 0.001284217 | 0.002968299 | no |
| C11orf90     | -0.121536898 | -3.232629934 | 0.001284335 | 0.002968299 | no |
| EAPP         | -0.121526273 | -3.232343095 | 0.001285605 | 0.002970896 | no |
| C5orf39      | 0.121513652  | 3.232002386  | 0.001287116 | 0.002974048 | no |
| NDRG1        | 0.121498335  | 3.231588886  | 0.001288952 | 0.002977949 | no |
| DCP1B        | 0.121490551  | 3.231378737  | 0.001289886 | 0.002979767 | no |
| USHBP1       | -0.121466779 | -3.230736983 | 0.001292742 | 0.002986023 | no |
| CHRNB4       | 0.121450819  | 3.230306143  | 0.001294663 | 0.002990118 | no |
| PROCA1       | -0.121448211 | -3.230235736 | 0.001294977 | 0.002990502 | no |
| AMY2A        | -0.121443553 | -3.230109983 | 0.001295538 | 0.002991457 | no |
| LBP          | 0.121440978  | 3.23004047   | 0.001295849 | 0.002991832 | no |
| THSD7A       | -0.121438291 | -3.229967917 | 0.001296173 | 0.002992238 | no |
| HRK          | -0.121412648 | -3.229275674 | 0.001299268 | 0.00299904  | no |
| PEX7         | -0.121390574 | -3.228679776 | 0.001301937 | 0.003004859 | no |
| FAM160A2     | -0.121383768 | -3.228496067 | 0.001302761 | 0.003006418 | no |
| ANXA13       | 0.121372471  | 3.228191103  | 0.00130413  | 0.003009234 | no |
| C9orf84      | 0.121361813  | 3.227903376  | 0.001305423 | 0.003011873 | no |
| HSPA1L       | -0.121322266 | -3.226835814 | 0.001310231 | 0.00302262  | no |
| L3MBTL4      | 0.121318272  | 3.22672799   | 0.001310717 | 0.003023397 | no |
| DDN          | -0.121284644 | -3.225820227 | 0.001314819 | 0.003032513 | no |
| SLC12A5      | -0.121266141 | -3.225320769 | 0.001317081 | 0.003037252 | no |
| U2AF1        | -0.121264835 | -3.225285514 | 0.001317241 | 0.003037252 | no |
| CHAF1B       | 0.121264152  | 3.225267071  | 0.001317324 | 0.003037252 | no |
| DDI2         | 0.121255422  | 3.225031402  | 0.001318393 | 0.00303937  | no |
| CDH7         | -0.12124793  | -3.224829184 | 0.001319311 | 0.003041139 | no |

|             |              |              |             |             |    |
|-------------|--------------|--------------|-------------|-------------|----|
| LOC644669   | -0.121246009 | -3.22477732  | 0.001319546 | 0.003041335 | no |
| ELOVL5      | 0.121213318  | 3.223894865  | 0.001323559 | 0.003050235 | no |
| MBOAT4      | 0.121198504  | 3.223494982  | 0.001325381 | 0.003054085 | no |
| SP3         | 0.121192584  | 3.223335181  | 0.001326109 | 0.003055416 | no |
| GABRA1      | -0.121170981 | -3.222752056 | 0.001328772 | 0.003061201 | no |
| NUDC        | -0.121151753 | -3.222233047 | 0.001331145 | 0.00306632  | no |
| MADCAM1     | -0.121136995 | -3.221834681 | 0.00133297  | 0.003070174 | no |
| BUB3        | -0.121133498 | -3.221740279 | 0.001333403 | 0.00307082  | no |
| OR13C2      | 0.121128934  | 3.221617098  | 0.001333967 | 0.003071771 | no |
| CARKD       | -0.121124693 | -3.221502621 | 0.001334492 | 0.003072631 | no |
| SHC3        | -0.121091183 | -3.220598104 | 0.001338648 | 0.003081848 | no |
| SLC44A2     | -0.121069571 | -3.220014748 | 0.001341335 | 0.003087682 | no |
| ZDHHC11     | -0.121048193 | -3.219437704 | 0.001343997 | 0.003093458 | no |
| EPB41L1     | -0.121044663 | -3.219342421 | 0.001344437 | 0.003094119 | no |
| SLITRK4     | -0.121041989 | -3.219270243 | 0.001344771 | 0.003094534 | no |
| EDEM3       | 0.121032905  | 3.21902506   | 0.001345904 | 0.00309679  | no |
| HES5        | -0.12100269  | -3.21820952  | 0.00134968  | 0.003105125 | no |
| SNORD116-28 | -0.120993715 | -3.217967266 | 0.001350804 | 0.003107356 | no |
| TMEM44      | 0.120975966  | 3.217488194  | 0.001353028 | 0.003112119 | no |
| ZNF592      | -0.120973604 | -3.217424442 | 0.001353325 | 0.003112447 | no |
| TYW3        | 0.120967894  | 3.217270325  | 0.001354041 | 0.00311374  | no |
| SLC25A12    | -0.120964652 | -3.217182811 | 0.001354448 | 0.003114322 | no |
| SNORD1C     | 0.120949899  | 3.21678462   | 0.001356301 | 0.003118229 | no |
| CCDC102B    | 0.120937474  | 3.216449261  | 0.001357864 | 0.003121466 | no |
| ISG15       | 0.120935673  | 3.21640066   | 0.001358091 | 0.003121632 | no |
| ASPRV1      | -0.12092065  | -3.215995158 | 0.001359983 | 0.003125626 | no |
| OR10AD1     | 0.120905006  | 3.215572929  | 0.001361955 | 0.003129804 | no |
| FAM18A      | 0.120884317  | 3.215014527  | 0.001364568 | 0.003135452 | no |
| PTPN5       | -0.120882604 | -3.214968292 | 0.001364785 | 0.003135593 | no |
| MYOZ2       | -0.120853194 | -3.214174517 | 0.001368508 | 0.003143789 | no |
| SPDYA       | 0.120851597  | 3.214131416  | 0.00136871  | 0.003143897 | no |
| CENPN       | 0.120813848  | 3.213112579  | 0.001373503 | 0.003154271 | no |
| ZFPL1       | -0.120813569 | -3.213105042 | 0.001373538 | 0.003154271 | no |
| SERINC4     | -0.120807079 | -3.212929902 | 0.001374364 | 0.003155808 | no |
| PSD2        | -0.120802677 | -3.21281107  | 0.001374924 | 0.003156736 | no |
| ZNF365      | -0.12078255  | -3.212267856 | 0.001377488 | 0.003162264 | no |
| DLEC1       | 0.120781099  | 3.212228711  | 0.001377673 | 0.003162329 | no |
| C2orf60     | -0.120770046 | -3.211930388 | 0.001379084 | 0.003165207 | no |
| MIB2        | -0.120758973 | -3.211631556 | 0.001380497 | 0.003168093 | no |
| MRPS14      | 0.120748016  | 3.211335835  | 0.001381898 | 0.003170947 | no |
| C19orf24    | 0.120731384  | 3.21088694   | 0.001384027 | 0.003175471 | no |
| DHX15       | 0.120711532  | 3.210351166  | 0.001386571 | 0.003180669 | no |
| KLK13       | 0.120711252  | 3.210343614  | 0.001386607 | 0.003180669 | no |
| BLOC1S3     | 0.120676627  | 3.209409147  | 0.001391055 | 0.003190272 | no |
| MAB21L1     | 0.120676213  | 3.209397972  | 0.001391109 | 0.003190272 | no |
| NSMCE4A     | -0.120674588 | -3.20935413  | 0.001391318 | 0.003190389 | no |
| ZNF524      | 0.120668658  | 3.209194088  | 0.001392081 | 0.003191778 | no |
| TTC13       | -0.120649554 | -3.208678511 | 0.001394543 | 0.003196736 | no |
| KIF23       | 0.120649422  | 3.20867493   | 0.00139456  | 0.003196736 | no |
| DDO         | 0.120642702  | 3.208493594  | 0.001395427 | 0.00319836  | no |
| BIRC7       | 0.12059815   | 3.207291232  | 0.001401186 | 0.003211197 | no |

|              |              |              |             |             |    |
|--------------|--------------|--------------|-------------|-------------|----|
| DNAJB13      | 0.120593541  | 3.207166839  | 0.001401783 | 0.003212202 | no |
| LOC100131496 | 0.120590673  | 3.207089433  | 0.001402155 | 0.003212689 | no |
| GPR75        | -0.120527568 | -3.205386425 | 0.001410356 | 0.003231113 | no |
| UQCR10       | 0.120485491  | 3.204250926  | 0.001415849 | 0.003243329 | no |
| SFRP2        | -0.120472442 | -3.203898773 | 0.001417556 | 0.003246873 | no |
| FAM66E       | -0.120459596 | -3.203552107 | 0.001419239 | 0.003250359 | no |
| EIF4A1       | 0.120454045  | 3.203402311  | 0.001419966 | 0.003251657 | no |
| QARS         | 0.120438822  | 3.202991516  | 0.001421964 | 0.003255862 | no |
| SLC17A7      | -0.120437445 | -3.202954348 | 0.001422144 | 0.003255907 | no |
| MYL3         | -0.120414519 | -3.20233567  | 0.001425158 | 0.003262437 | no |
| CDV3         | 0.120389294  | 3.201654963  | 0.00142848  | 0.003269672 | no |
| DYNLT1       | 0.120339513  | 3.20031162   | 0.001435057 | 0.003284354 | no |
| ENAH         | -0.120303314 | -3.199334826 | 0.001439857 | 0.003294967 | no |
| TCEAL1       | -0.120296733 | -3.199157222 | 0.001440732 | 0.003296595 | no |
| LRFN5        | -0.120281726 | -3.198752279 | 0.001442727 | 0.003300787 | no |
| AUP1         | 0.120240945  | 3.19765183   | 0.001448163 | 0.003312848 | no |
| WNT7A        | -0.120226527 | -3.197262787 | 0.001450089 | 0.003316879 | no |
| ADM          | 0.120211163  | 3.196848203  | 0.001452144 | 0.003321204 | no |
| MAGED4       | -0.12019464  | -3.196402364 | 0.001454357 | 0.00332589  | no |
| SMAD7        | -0.120191865 | -3.196327473 | 0.001454729 | 0.003326364 | no |
| ZZEF1        | -0.120187001 | -3.196196225 | 0.001455381 | 0.00332748  | no |
| FOS          | 0.120182408  | 3.196072296  | 0.001455998 | 0.003328199 | no |
| AP4E1        | 0.1201822    | 3.196066702  | 0.001456025 | 0.003328199 | no |
| C13orf16     | -0.120163986 | -3.195575215 | 0.001458471 | 0.00333336  | no |
| NIPAI        | -0.120162932 | -3.195546772 | 0.001458613 | 0.00333336  | no |
| ZNRF4        | -0.120158448 | -3.195425783 | 0.001459216 | 0.003334361 | no |
| CTSH         | 0.120151445  | 3.195236818  | 0.001460158 | 0.003336136 | no |
| MTCH2        | 0.120142745  | 3.19500207   | 0.001461328 | 0.003338434 | no |
| DDX1         | -0.12013454  | -3.194780684 | 0.001462433 | 0.003340581 | no |
| STX1A        | -0.120129207 | -3.194636774 | 0.001463152 | 0.003341845 | no |
| HLX          | 0.120120776  | 3.19440928   | 0.001464289 | 0.003344063 | no |
| NCOA5        | -0.120108559 | -3.194079645 | 0.001465938 | 0.00334745  | no |
| HRCT1        | 0.120103463  | 3.193942148  | 0.001466626 | 0.003348644 | no |
| SAPS1        | 0.120095384  | 3.193724156  | 0.001467717 | 0.003350758 | no |
| AVPI1        | -0.120091238 | -3.193612289 | 0.001468278 | 0.003351659 | no |
| IMPG2        | 0.12005412   | 3.192610765  | 0.001473305 | 0.003362754 | no |
| MTCH1        | -0.120004145 | -3.191262346 | 0.001480098 | 0.003377878 | no |
| ITGB1BP1     | 0.11998665   | 3.190790314  | 0.001482483 | 0.003382939 | no |
| NCRNA00029   | 0.119969939  | 3.190339431  | 0.001484764 | 0.003387763 | no |
| GRIN2B       | -0.119960431 | -3.190082873 | 0.001486064 | 0.003390345 | no |
| GORASP2      | 0.119917618  | 3.188927758  | 0.001491928 | 0.00340334  | no |
| CRIPAK       | -0.119905984 | -3.18861386  | 0.001493525 | 0.003406599 | no |
| UBR4         | -0.119897934 | -3.188396673 | 0.001494631 | 0.003408592 | no |
| GPR35        | 0.11989717   | 3.188376046  | 0.001494736 | 0.003408592 | no |
| RPS27A       | -0.119888827 | -3.188150948 | 0.001495884 | 0.003410824 | no |
| MUS81        | -0.119883231 | -3.187999983 | 0.001496653 | 0.003412194 | no |
| ZNF251       | -0.119878055 | -3.187860332 | 0.001497366 | 0.003413434 | no |
| MAP3K7       | 0.119873292  | 3.187731819  | 0.001498022 | 0.003414544 | no |
| SYCP2        | -0.119844975 | -3.186967831 | 0.001501927 | 0.003423059 | no |
| DNM1         | -0.119815602 | -3.186175349 | 0.001505987 | 0.003431569 | no |
| FSTL4        | -0.11981551  | -3.18617286  | 0.001506    | 0.003431569 | no |

|              |              |              |             |             |    |
|--------------|--------------|--------------|-------------|-------------|----|
| GPR26        | -0.119793751 | -3.185585821 | 0.001509014 | 0.003437947 | no |
| POLDIP2      | -0.11979285  | -3.185561523 | 0.001509139 | 0.003437947 | no |
| FBXL12       | 0.119790338  | 3.185493733  | 0.001509488 | 0.003438353 | no |
| CBX3         | 0.119773383  | 3.185036312  | 0.001511841 | 0.003443326 | no |
| C20orf194    | -0.119761525 | -3.184716387 | 0.001513489 | 0.003446691 | no |
| ZMYND19      | -0.119751624 | -3.184449274 | 0.001514866 | 0.003449439 | no |
| APPL1        | -0.119739015 | -3.184109081 | 0.001516622 | 0.003453048 | no |
| FRMPD4       | -0.119734919 | -3.183998585 | 0.001517193 | 0.003453958 | no |
| CHCHD3       | 0.119728853  | 3.183834918  | 0.001518038 | 0.003455494 | no |
| CAB39L       | -0.119680504 | -3.182530542 | 0.001524793 | 0.003470413 | no |
| GBX2         | -0.119679484 | -3.182503033 | 0.001524936 | 0.003470413 | no |
| PCDH8        | -0.119662789 | -3.182052614 | 0.001527275 | 0.003475247 | no |
| OR4N4        | -0.119661872 | -3.182027887 | 0.001527404 | 0.003475247 | no |
| SUB1         | -0.119650666 | -3.181725556 | 0.001528976 | 0.003478352 | no |
| CRYBA1       | 0.119649691  | 3.181699273  | 0.001529112 | 0.003478352 | no |
| SNAPIN       | 0.119647076  | 3.181628718  | 0.001529479 | 0.003478796 | no |
| S1PR1        | -0.119641133 | -3.181468381 | 0.001530314 | 0.003480303 | no |
| LIPT1        | 0.119639502  | 3.181424397  | 0.001530543 | 0.003480432 | no |
| C17orf70     | -0.119637375 | -3.181366993 | 0.001530842 | 0.00348072  | no |
| COPS8        | 0.119614028  | 3.180737167  | 0.001534126 | 0.003487794 | no |
| EPB41L4B     | -0.119585832 | -3.179976509 | 0.0015381   | 0.003496436 | no |
| PPIL6        | 0.119581337  | 3.179855238  | 0.001538734 | 0.003497485 | no |
| C3orf31      | -0.119579294 | -3.179800129 | 0.001539023 | 0.003497747 | no |
| ULBP1        | 0.119550833  | 3.179032311  | 0.001543046 | 0.003506498 | no |
| UBE2Q2P1     | -0.119543691 | -3.178839653 | 0.001544057 | 0.003508401 | no |
| CNIH2        | -0.119535744 | -3.178625271 | 0.001545183 | 0.003510565 | no |
| PLA2G12A     | -0.119479816 | -3.177116523 | 0.001553128 | 0.003528218 | no |
| POLE3        | 0.119437818  | 3.17598357   | 0.001559118 | 0.003541428 | no |
| HTR1E        | -0.11940544  | -3.175110162 | 0.001563751 | 0.003551552 | no |
| JTB          | 0.119388139  | 3.174643453  | 0.001566232 | 0.003556588 | no |
| C11orf10     | 0.119387524  | 3.174626852  | 0.00156632  | 0.003556588 | no |
| CSF3         | 0.119339941  | 3.173343291  | 0.001573162 | 0.003571722 | no |
| TAS2R60      | 0.119336126  | 3.173240378  | 0.001573712 | 0.003572569 | no |
| RNF185       | -0.119307201 | -3.172460138 | 0.001577885 | 0.003581642 | no |
| RIMS3        | -0.119298872 | -3.172235484 | 0.001579089 | 0.003583971 | no |
| GPR22        | -0.119290496 | -3.172009544 | 0.0015803   | 0.003585999 | no |
| AP3M1        | -0.119290242 | -3.172002688 | 0.001580337 | 0.003585999 | no |
| C1orf106     | -0.119281054 | -3.171754833 | 0.001581667 | 0.003588614 | no |
| NANOS3       | -0.119277694 | -3.171664219 | 0.001582153 | 0.003589315 | no |
| CSNK2A2      | -0.11926193  | -3.171238973 | 0.001584438 | 0.003594095 | no |
| RARB         | 0.119252587  | 3.170986964  | 0.001585793 | 0.003596766 | no |
| XYLT1        | -0.11924853  | -3.170877526 | 0.001586382 | 0.003597698 | no |
| C14orf80     | -0.119230633 | -3.170394768 | 0.001588983 | 0.003603191 | no |
| HFE2         | -0.119186848 | -3.169213732 | 0.001595361 | 0.003617249 | no |
| MYOD1        | -0.119181407 | -3.169066982 | 0.001596155 | 0.003618643 | no |
| PCGF1        | 0.119177278  | 3.168955605  | 0.001596758 | 0.003619605 | no |
| GSTM4        | 0.119165461  | 3.168636841  | 0.001598485 | 0.003623113 | no |
| CRYL1        | -0.119162546 | -3.168558217 | 0.001598911 | 0.003623673 | no |
| LOC100132111 | 0.119156504  | 3.168395266  | 0.001599795 | 0.003625269 | no |
| PCDH11Y      | -0.119144872 | -3.168081514 | 0.001601497 | 0.003628721 | no |
| TOX2         | -0.119142578 | -3.168019639 | 0.001601833 | 0.003629075 | no |



|            |              |              |             |             |    |
|------------|--------------|--------------|-------------|-------------|----|
| GJB2       | 0.119137745  | 3.167889274  | 0.001602542 | 0.003629879 | no |
| N4BP2L2    | -0.119137708 | -3.167888275 | 0.001602547 | 0.003629879 | no |
| A2BP1      | -0.119124958 | -3.167544357 | 0.001604417 | 0.003633706 | no |
| NCKAP5     | -0.119064393 | -3.165910777 | 0.001613324 | 0.00365347  | no |
| ANGPTL4    | 0.119034901  | 3.165115298  | 0.001617678 | 0.00366292  | no |
| FAM53C     | -0.119026511 | -3.164889016 | 0.001618918 | 0.003665318 | no |
| RSRC1      | 0.118997131  | 3.164096587  | 0.00162327  | 0.003674758 | no |
| SFRP1      | 0.118990558  | 3.163919309  | 0.001624244 | 0.003676553 | no |
| IGSF11     | -0.118983109 | -3.163718396 | 0.00162535  | 0.003678644 | no |
| ZDHHC4     | 0.118977324  | 3.163562361  | 0.001626209 | 0.003680176 | no |
| PSMD3      | -0.118966087 | -3.163259282 | 0.001627879 | 0.003683543 | no |
| TGIF2      | 0.118946249  | 3.16272422   | 0.001630831 | 0.003689809 | no |
| NCRNA00092 | 0.118922199  | 3.162075586  | 0.001634416 | 0.003697506 | no |
| LOC81691   | -0.118867472 | -3.160599546 | 0.001642601 | 0.003715608 | no |
| SAMD12     | -0.1188581   | -3.160346784 | 0.001644006 | 0.003718371 | no |
| GRHL3      | -0.118852578 | -3.160197871 | 0.001644835 | 0.003719828 | no |
| LOC388588  | 0.118822533  | 3.159387554  | 0.00164935  | 0.003729622 | no |
| C9orf40    | 0.118800044  | 3.158781009  | 0.001652737 | 0.003736864 | no |
| CORT       | -0.118784416 | -3.158359526 | 0.001655094 | 0.003741776 | no |
| CYP27C1    | -0.118742453 | -3.157227812 | 0.00166144  | 0.003755701 | no |
| C17orf104  | -0.118700689 | -3.156101493 | 0.001667777 | 0.003769606 | no |
| 6-Mar      | -0.118648408 | -3.154691548 | 0.001675742 | 0.003787184 | no |
| SPSB4      | -0.118641317 | -3.154500324 | 0.001676825 | 0.003789208 | no |
| ZMYND8     | -0.118631044 | -3.154223269 | 0.001678395 | 0.003792333 | no |
| PTPLA      | 0.118622944  | 3.154004827  | 0.001679634 | 0.003794708 | no |
| NPY        | -0.118591532 | -3.153157773 | 0.001684446 | 0.003805155 | no |
| ZNF793     | -0.118586739 | -3.153028474 | 0.001685182 | 0.003806391 | no |
| PLXNA1     | 0.118584344  | 3.152963878  | 0.001685549 | 0.003806796 | no |
| P2RX5      | -0.118579288 | -3.15282753  | 0.001686326 | 0.003808124 | no |
| TAF1B      | 0.118568156  | 3.152527327  | 0.001688036 | 0.00381156  | no |
| ZNF35      | 0.118560049  | 3.152308712  | 0.001689282 | 0.003813949 | no |
| HOXB13     | 0.118494836  | 3.150550111  | 0.00169934  | 0.003836228 | no |
| AGPAT1     | -0.11846782  | -3.149821568 | 0.001703523 | 0.003845241 | no |
| NUDT3      | 0.118441926  | 3.149123321  | 0.001707541 | 0.00385388  | no |
| DENND2C    | 0.118433692  | 3.14890128   | 0.00170882  | 0.003856337 | no |
| GDF11      | -0.118428122 | -3.148751074 | 0.001709686 | 0.003857861 | no |
| LHFPL5     | -0.118419533 | -3.148519458 | 0.001711022 | 0.003860445 | no |
| EXOC6      | -0.118389679 | -3.147714427 | 0.001715674 | 0.003870162 | no |
| RASGRP3    | 0.118389438  | 3.147707921  | 0.001715712 | 0.003870162 | no |
| EIF2S3     | 0.118336636  | 3.146284084  | 0.001723968 | 0.003888352 | no |
| OLFM4      | -0.118332032 | -3.146159936 | 0.00172469  | 0.003889545 | no |
| QPCTL      | 0.118324138  | 3.145947076  | 0.001725928 | 0.003891903 | no |
| TRPC6      | 0.118322908  | 3.145913924  | 0.00172612  | 0.003891904 | no |
| RNF170     | -0.118319682 | -3.145826915 | 0.001726627 | 0.003892611 | no |
| FTSJ3      | -0.118297036 | -3.145216283 | 0.001730184 | 0.003900196 | no |
| SLC35F1    | -0.118260601 | -3.144233831 | 0.001735921 | 0.003912692 | no |
| ACBD6      | -0.118245347 | -3.143822498 | 0.001738328 | 0.003917388 | no |
| ANP32A     | -0.118244943 | -3.143811603 | 0.001738392 | 0.003917388 | no |
| NTHL1      | -0.118233541 | -3.143504177 | 0.001740193 | 0.003920639 | no |
| ATP10A     | -0.118233356 | -3.143499174 | 0.001740222 | 0.003920639 | no |
| RPL10      | -0.118198186 | -3.142550858 | 0.00174579  | 0.003932388 | no |

|           |              |              |             |             |    |
|-----------|--------------|--------------|-------------|-------------|----|
| ZBTB8B    | -0.118197886 | -3.14254276  | 0.001745837 | 0.003932388 | no |
| BCL6B     | 0.118196727  | 3.142511508  | 0.001746021 | 0.003932388 | no |
| ZNF43     | -0.118175001 | -3.141925692 | 0.001749469 | 0.003939459 | no |
| LOC285359 | -0.118174487 | -3.141911849 | 0.00174955  | 0.003939459 | no |
| PDE6C     | -0.118165922 | -3.141680914 | 0.001750911 | 0.003942084 | no |
| AMBRA1    | -0.118117592 | -3.140377767 | 0.001758609 | 0.003958974 | no |
| PDZRN4    | -0.118101078 | -3.139932489 | 0.001761246 | 0.00396447  | no |
| ESAM      | 0.118081873  | 3.13941468   | 0.001764318 | 0.003970942 | no |
| COG7      | -0.118076732 | -3.139276073 | 0.001765141 | 0.003972352 | no |
| TAS2R14   | -0.118059297 | -3.138805972 | 0.001767935 | 0.003978197 | no |
| GGTLC1    | -0.118027697 | -3.137953949 | 0.001773009 | 0.003989172 | no |
| CHIC1     | -0.118024513 | -3.137868102 | 0.001773521 | 0.003989516 | no |
| PMS1      | -0.118024292 | -3.137862157 | 0.001773557 | 0.003989516 | no |
| PCL0      | -0.117989285 | -3.136918289 | 0.001779195 | 0.004001754 | no |
| CUL4A     | 0.11796761   | 3.13633389   | 0.001782695 | 0.004009179 | no |
| C6orf118  | 0.117964116  | 3.136239695  | 0.001783259 | 0.004009607 | no |
| KHK       | -0.117963977 | -3.136235959 | 0.001783282 | 0.004009607 | no |
| TSC22D3   | 0.1179586    | 3.136090986  | 0.001784151 | 0.004011116 | no |
| MAP7D2    | -0.117910667 | -3.134798655 | 0.001791918 | 0.00402813  | no |
| ROGDI     | -0.117900201 | -3.134516461 | 0.001793618 | 0.004031503 | no |
| C1orf131  | 0.117865155  | 3.133571592  | 0.001799322 | 0.004043873 | no |
| ZBTB6     | -0.11786037  | -3.133442604 | 0.001800102 | 0.004045176 | no |
| HOXB4     | 0.11785891   | 3.133403228  | 0.00180034  | 0.004045262 | no |
| C12orf42  | 0.117852345  | 3.133226245  | 0.00180141  | 0.004047218 | no |
| PDE6B     | 0.117842533  | 3.132961702  | 0.001803012 | 0.004050366 | no |
| C3orf16   | 0.11782663   | 3.132532942  | 0.00180561  | 0.004055753 | no |
| GRM7      | -0.117803471 | -3.131908571 | 0.001809401 | 0.004063815 | no |
| SMYD2     | 0.117799783  | 3.131809151  | 0.001810005 | 0.00406472  | no |
| PIGF      | 0.117786465  | 3.131450094  | 0.001812188 | 0.004069172 | no |
| PSMD14    | 0.117783661  | 3.131374503  | 0.001812648 | 0.004069658 | no |
| TTC32     | -0.117782691 | -3.131348361 | 0.001812807 | 0.004069658 | no |
| FABP4     | 0.117763914  | 3.130842142  | 0.001815891 | 0.004076128 | no |
| LOC643677 | -0.117747275 | -3.130393555 | 0.001818628 | 0.004081818 | no |
| PDRG1     | 0.117722528  | 3.129726388  | 0.001822705 | 0.004090515 | no |
| KRT18     | 0.117719655  | 3.129648934  | 0.001823179 | 0.004091124 | no |
| NUDT7     | -0.117718017 | -3.129604783 | 0.001823449 | 0.004091276 | no |
| PDE11A    | -0.117664958 | -3.128174347 | 0.001832222 | 0.004110504 | no |
| TFB1M     | 0.117643784  | 3.12760355   | 0.001835734 | 0.004117925 | no |
| ECE2      | -0.117623619 | -3.127059911 | 0.001839084 | 0.004124983 | no |
| NRGN      | -0.117617574 | -3.126896948 | 0.001840089 | 0.004126781 | no |
| GOT1      | -0.117616286 | -3.126862233 | 0.001840304 | 0.004126803 | no |
| TUBB2A    | -0.117596438 | -3.126327175 | 0.001843609 | 0.004133756 | no |
| TEAD1     | -0.117577771 | -3.125823941 | 0.001846722 | 0.004139929 | no |
| TLX1      | -0.117577476 | -3.125815996 | 0.001846771 | 0.004139929 | no |
| MCM6      | 0.11756775   | 3.125553813  | 0.001848395 | 0.00414311  | no |
| HIST3H2BB | -0.117544723 | -3.124933043 | 0.001852246 | 0.00415128  | no |
| GNRHR     | -0.117525865 | -3.124424692 | 0.001855404 | 0.004157899 | no |
| GDPD5     | 0.117517555  | 3.124200665  | 0.001856798 | 0.00416056  | no |
| LSM5      | 0.117496516  | 3.123633521  | 0.00186033  | 0.004168013 | no |
| NRXN3     | -0.117489799 | -3.123452447 | 0.001861459 | 0.004170081 | no |
| CYP2B7P1  | -0.117487047 | -3.12337827  | 0.001861922 | 0.004170655 | no |

|           |              |              |             |             |    |
|-----------|--------------|--------------|-------------|-------------|----|
| BBS10     | -0.117484137 | -3.123299812 | 0.001862411 | 0.004171289 | no |
| CAMK2A    | -0.117451889 | -3.122430531 | 0.001867843 | 0.004182991 | no |
| BTNL8     | 0.117439269  | 3.122090339  | 0.001869972 | 0.004187297 | no |
| KCTD3     | -0.117433441 | -3.121933218 | 0.001870957 | 0.004189037 | no |
| SMARCC1   | -0.117422277 | -3.121645561 | 0.00187276  | 0.00419261  | no |
| SPNS3     | 0.117420029  | 3.121571692  | 0.001873223 | 0.004193003 | no |
| DGKK      | -0.117419277 | -3.121551425 | 0.00187335  | 0.004193003 | no |
| C15orf29  | -0.117410112 | -3.121304365 | 0.001874901 | 0.004195666 | no |
| BTBD11    | 0.117409794  | 3.121295789  | 0.001874955 | 0.004195666 | no |
| SCML2     | -0.117401439 | -3.121070574 | 0.001876369 | 0.004198366 | no |
| DUSP2     | 0.117395346  | 3.120906326  | 0.001877402 | 0.004200211 | no |
| TRIM29    | 0.117388525  | 3.120722453  | 0.001878558 | 0.004202333 | no |
| EXOSC7    | -0.117385816 | -3.120649434 | 0.001879017 | 0.004202895 | no |
| PPP3R2    | -0.11738218  | -3.120551429 | 0.001879634 | 0.004203809 | no |
| CCNB1     | 0.117379646  | 3.120483118  | 0.001880064 | 0.004204306 | no |
| C3orf47   | -0.117374689 | -3.120349506 | 0.001880905 | 0.004205722 | no |
| KIF24     | 0.117366995  | 3.120142094  | 0.001882211 | 0.004208178 | no |
| CAMK1G    | -0.117345602 | -3.119565435 | 0.001885848 | 0.004215842 | no |
| ATXN2L    | -0.117339815 | -3.119409437 | 0.001886833 | 0.004217578 | no |
| RTBDN     | -0.117313334 | -3.118695623 | 0.001891346 | 0.004227198 | no |
| C20orf46  | -0.117253419 | -3.117080633 | 0.001901593 | 0.00424963  | no |
| DBR1      | 0.117232171  | 3.116507888  | 0.001905239 | 0.004257308 | no |
| KCNRG     | -0.11720399  | -3.115748282 | 0.001910085 | 0.004267665 | no |
| IKZF2     | 0.117188613  | 3.115333814  | 0.001912734 | 0.004273111 | no |
| PCSK6     | -0.11717507  | -3.114968773 | 0.00191507  | 0.004277856 | no |
| PGBD2     | 0.117169599  | 3.114821309  | 0.001916014 | 0.004279493 | no |
| OR2L3     | -0.117166494 | -3.114737632 | 0.00191655  | 0.004280217 | no |
| DCBLD1    | 0.11712697   | 3.11367231   | 0.001923386 | 0.00429501  | no |
| ORC3L     | -0.117125502 | -3.113632741 | 0.001923641 | 0.004295104 | no |
| C7orf13   | -0.117118484 | -3.113443583 | 0.001924857 | 0.004297345 | no |
| ZBTB16    | -0.117114149 | -3.11332675  | 0.001925609 | 0.004298549 | no |
| C8orf34   | 0.117091176  | 3.112707534  | 0.001929597 | 0.004306976 | no |
| RYR2      | -0.117088348 | -3.112631329 | 0.001930088 | 0.004307597 | no |
| LMO3      | -0.11707206  | -3.112192309 | 0.001932921 | 0.004313443 | no |
| MESP2     | 0.117060291  | 3.111875102  | 0.00193497  | 0.00431754  | no |
| DAD1L     | 0.117056111  | 3.111762442  | 0.001935699 | 0.004318688 | no |
| GABRB1    | -0.117050913 | -3.11162232  | 0.001936605 | 0.004320233 | no |
| ZNF626    | -0.116999632 | -3.110240193 | 0.001945564 | 0.004339741 | no |
| C14orf166 | 0.116988924  | 3.109951571  | 0.00194744  | 0.004343445 | no |
| HOXA3     | 0.116952605  | 3.108972701  | 0.001953813 | 0.004357181 | no |
| MEST      | 0.116949077  | 3.108877623  | 0.001954434 | 0.004358083 | no |
| LHPP      | -0.116935387 | -3.108508663 | 0.001956842 | 0.004362972 | no |
| FAM183A   | 0.11692114   | 3.108124663  | 0.001959351 | 0.004368084 | no |
| HOXC4     | 0.116859123  | 3.106453228  | 0.001970307 | 0.004391444 | no |
| CASR      | 0.116858941  | 3.10644833   | 0.001970339 | 0.004391444 | no |
| UFM1      | 0.116858142  | 3.106426809  | 0.001970481 | 0.004391444 | no |
| NUDT15    | 0.116841019  | 3.105965311  | 0.001973516 | 0.004397724 | no |
| TPRA1     | 0.116793558  | 3.10468622   | 0.001981951 | 0.004416034 | no |
| CCDC109A  | -0.116789193 | -3.104568585 | 0.001982729 | 0.004417279 | no |
| MAP3K12   | -0.116785698 | -3.104474384 | 0.001983352 | 0.00441818  | no |
| PFDN2     | -0.116782321 | -3.104383385 | 0.001983953 | 0.004418329 | no |

|              |              |              |             |             |    |
|--------------|--------------|--------------|-------------|-------------|----|
| LIMS2        | -0.116782192 | -3.1043799   | 0.001983976 | 0.004418329 | no |
| ZNF441       | -0.116781645 | -3.104365149 | 0.001984074 | 0.004418329 | no |
| CCDC74A      | 0.116758408  | 3.103738914  | 0.00198822  | 0.004427074 | no |
| MTHFSD       | -0.116755992 | -3.103673804 | 0.001988651 | 0.004427505 | no |
| NSF          | -0.116754872 | -3.103643618 | 0.001988852 | 0.004427505 | no |
| TMEM80       | -0.116687326 | -3.101823288 | 0.002000952 | 0.004453952 | no |
| ATP6V1H      | -0.11667532  | -3.101499735 | 0.00200311  | 0.004458264 | no |
| FAM108B1     | -0.116654447 | -3.100937238 | 0.002006866 | 0.004466133 | no |
| DHX57        | -0.116645757 | -3.100703033 | 0.002008432 | 0.004469022 | no |
| SSTR3        | -0.116644789 | -3.100676945 | 0.002008607 | 0.004469022 | no |
| FAM125B      | -0.116632968 | -3.100358396 | 0.002010738 | 0.004473274 | no |
| WDR7         | -0.116621542 | -3.100050477 | 0.002012801 | 0.00447737  | no |
| UCP1         | 0.116608496  | 3.099698918  | 0.002015159 | 0.004482121 | no |
| MPHOSPH10    | -0.116592876 | -3.099277972 | 0.002017985 | 0.004487896 | no |
| CYTSB        | -0.116591692 | -3.099246068 | 0.002018199 | 0.004487896 | no |
| SYT15        | -0.116580389 | -3.098941465 | 0.002020247 | 0.004491955 | no |
| CCDC48       | 0.116562418  | 3.098457167  | 0.002023506 | 0.004498707 | no |
| IGDCC4       | 0.116532362  | 3.097647222  | 0.002028968 | 0.004510354 | no |
| UPF3B        | -0.116529542 | -3.097571237 | 0.002029481 | 0.004510998 | no |
| MRPL15       | 0.116514324  | 3.097161144  | 0.002032252 | 0.004516661 | no |
| C1orf63      | 0.11651152   | 3.097085581  | 0.002032763 | 0.0045173   | no |
| PHF12        | -0.116503187 | -3.096861031 | 0.002034282 | 0.00452018  | no |
| ATP1A2       | -0.11647933  | -3.096218144 | 0.002038637 | 0.004529359 | no |
| TBR1         | -0.116460331 | -3.095706183 | 0.002042112 | 0.00453658  | no |
| REC8         | -0.116456862 | -3.09561271  | 0.002042747 | 0.004537492 | no |
| LRRC45       | -0.11643143  | -3.094927395 | 0.002047407 | 0.004547345 | no |
| HIST3H2A     | -0.116416813 | -3.094533498 | 0.002050091 | 0.004552805 | no |
| ALS2         | -0.116414058 | -3.094459259 | 0.002050597 | 0.004553428 | no |
| CDH12        | -0.116395041 | -3.093946817 | 0.002054093 | 0.004560208 | no |
| OR52K2       | 0.116394999  | 3.093945696  | 0.002054101 | 0.004560208 | no |
| AFF4         | -0.116359303 | -3.092983819 | 0.002060679 | 0.004574309 | no |
| LOC100134368 | -0.116352878 | -3.092810681 | 0.002061865 | 0.004576439 | no |
| ASAH2        | -0.116330015 | -3.09219461  | 0.00206609  | 0.004585076 | no |
| GALNTL2      | 0.11632937   | 3.092177236  | 0.00206621  | 0.004585076 | no |
| RDM1         | 0.116300224  | 3.091391882  | 0.002071608 | 0.00459655  | no |
| MLL3         | -0.11626838  | -3.09053382  | 0.002077521 | 0.004609164 | no |
| GPR83        | -0.11626475  | -3.09043601  | 0.002078196 | 0.004610156 | no |
| LOC80054     | 0.116255435  | 3.090185023  | 0.002079929 | 0.004613494 | no |
| C12orf47     | -0.116237614 | -3.089704843 | 0.002083248 | 0.00462035  | no |
| YAF2         | -0.116235794 | -3.089655793 | 0.002083587 | 0.004620595 | no |
| LQK1         | 0.116226231  | 3.08939811   | 0.002085371 | 0.004624043 | no |
| ZIC3         | -0.116179212 | -3.088131207 | 0.00209416  | 0.004643023 | no |
| HNRNPK       | -0.116169723 | -3.087875524 | 0.002095938 | 0.004646455 | no |
| HPCA         | -0.116166337 | -3.08778429  | 0.002096572 | 0.004647352 | no |
| STAG2        | -0.116164261 | -3.08772836  | 0.002096962 | 0.004647706 | no |
| AKAP12       | 0.116160963  | 3.087639493  | 0.00209758  | 0.004648567 | no |
| C21orf131    | -0.116110636 | -3.086283486 | 0.002107039 | 0.004669018 | no |
| EPHA6        | -0.116097875 | -3.085939666 | 0.002109444 | 0.004673834 | no |
| NACA2        | -0.116075476 | -3.085336162 | 0.002113671 | 0.004682686 | no |
| C1orf141     | 0.116064914  | 3.085051578  | 0.002115667 | 0.004686594 | no |
| C8orf40      | 0.11604827   | 3.084603137  | 0.002118815 | 0.004693055 | no |

|           |              |              |             |             |    |
|-----------|--------------|--------------|-------------|-------------|----|
| MOGAT2    | 0.116023127  | 3.083925708  | 0.00212358  | 0.004703016 | no |
| CDR1      | -0.116022085 | -3.083897616 | 0.002123777 | 0.004703016 | no |
| PDGFC     | 0.116010465  | 3.083584565  | 0.002125983 | 0.004707384 | no |
| MAP3K9    | -0.115983598 | -3.082860695 | 0.00213109  | 0.004718176 | no |
| CIR1      | -0.115956372 | -3.082127159 | 0.002136277 | 0.004729142 | no |
| LOC283867 | 0.115949763  | 3.081949086  | 0.002137538 | 0.004731415 | no |
| ITFG3     | 0.115939847  | 3.081681926  | 0.002139431 | 0.004735087 | no |
| AZIN1     | -0.115925354 | -3.081291461 | 0.002142201 | 0.004740698 | no |
| SMCP      | -0.115923956 | -3.081253795 | 0.002142468 | 0.00474077  | no |
| ZUFSP     | -0.11591452  | -3.080999556 | 0.002144273 | 0.004744246 | no |
| RXFP1     | -0.115911512 | -3.080918523 | 0.002144849 | 0.004745    | no |
| HOXA5     | 0.115906245  | 3.080776618  | 0.002145858 | 0.004746712 | no |
| CCDC135   | 0.115894242  | 3.080453234  | 0.002148157 | 0.00475128  | no |
| CREG2     | -0.115886206 | -3.080236748 | 0.002149698 | 0.004754168 | no |
| PADI1     | 0.115881049  | 3.080097785  | 0.002150688 | 0.004755836 | no |
| CST4      | 0.115873627  | 3.079897824  | 0.002152113 | 0.004758063 | no |
| PKD1L3    | 0.115873351  | 3.079890408  | 0.002152166 | 0.004758063 | no |
| TMEM27    | -0.115870954 | -3.079825815 | 0.002152626 | 0.00475856  | no |
| WNK4      | 0.115869542  | 3.079787768  | 0.002152897 | 0.00475864  | no |
| NDUFA10   | -0.115865674 | -3.079683569 | 0.00215364  | 0.004759762 | no |
| CEP350    | -0.11584865  | -3.079224914 | 0.002156914 | 0.004766475 | no |
| LPCAT4    | -0.115834921 | -3.078855038 | 0.002159557 | 0.004771795 | no |
| CDH24     | -0.115828619 | -3.078685257 | 0.002160771 | 0.004773956 | no |
| HHAT      | 0.115817408  | 3.07838323   | 0.002162933 | 0.00477821  | no |
| OCEL1     | 0.115793632  | 3.07774269   | 0.002167524 | 0.004787828 | no |
| TRMT2A    | -0.115781074 | -3.077404351 | 0.002169952 | 0.004792669 | no |
| POLR3G    | 0.115734859  | 3.076159317  | 0.002178911 | 0.004811929 | no |
| EEF1D     | -0.115710838 | -3.075512185 | 0.00218358  | 0.004821715 | no |
| NCS1      | -0.115694799 | -3.075080098 | 0.002186703 | 0.004828084 | no |
| SELT      | 0.115679287  | 3.074662198  | 0.002189728 | 0.004834234 | no |
| TMPRSS3   | 0.115673427  | 3.07450434   | 0.002190871 | 0.00483623  | no |
| QRICH1    | -0.115665068 | -3.074279131 | 0.002192503 | 0.004839305 | no |
| LOC642597 | -0.115657161 | -3.074066124 | 0.002194048 | 0.004842186 | no |
| CCT8L2    | -0.1156364   | -3.073506833 | 0.002198109 | 0.004850619 | no |
| GNG2      | -0.11556627  | -3.071617621 | 0.002211878 | 0.00488047  | no |
| FAM134B   | 0.11556406   | 3.071558071  | 0.002212313 | 0.004880898 | no |
| ODF3      | -0.115551553 | -3.071221166 | 0.002214778 | 0.004885802 | no |
| SAT2      | -0.115546846 | -3.071094362 | 0.002215706 | 0.004887316 | no |
| UHRF1     | -0.115527038 | -3.070560768 | 0.002219615 | 0.004895405 | no |
| POLR2K    | 0.115513109  | 3.070185537  | 0.002222368 | 0.004900536 | no |
| CPNE9     | -0.115512813 | -3.070177575 | 0.002222426 | 0.004900536 | no |
| FAM50B    | 0.115488323  | 3.069517857  | 0.002227274 | 0.00491069  | no |
| H2BFXP    | -0.115475301 | -3.069167073 | 0.002229856 | 0.004915846 | no |
| RPL41     | 0.115446859  | 3.068400923  | 0.002235504 | 0.004927761 | no |
| KRTAP5-6  | -0.115441987 | -3.068269676 | 0.002236473 | 0.00492918  | no |
| NPPC      | 0.11544117   | 3.068247676  | 0.002236635 | 0.00492918  | no |
| PFKFB3    | 0.115436761  | 3.068128891  | 0.002237513 | 0.004930576 | no |
| FLJ34503  | -0.115403323 | -3.067228175 | 0.002244175 | 0.004944718 | no |
| ZNF7      | -0.115398349 | -3.067094198 | 0.002245168 | 0.004946366 | no |
| ZNF214    | 0.115379519  | 3.066586972  | 0.002248929 | 0.004954113 | no |
| CYP4Z2P   | -0.115362911 | -3.066139611 | 0.002252251 | 0.004960891 | no |

|          |              |              |             |             |    |
|----------|--------------|--------------|-------------|-------------|----|
| CNST     | -0.115354745 | -3.065919635 | 0.002253887 | 0.004963489 | no |
| MLNR     | 0.115354568  | 3.065914876  | 0.002253922 | 0.004963489 | no |
| FAM92B   | 0.115352059  | 3.065847283  | 0.002254425 | 0.004963654 | no |
| AGPAT5   | -0.115351744 | -3.0658388   | 0.002254488 | 0.004963654 | no |
| C12orf50 | 0.115347778  | 3.065731966  | 0.002255283 | 0.004964863 | no |
| ITGA8    | 0.115323996  | 3.065091361  | 0.002260054 | 0.004974825 | no |
| TRIM45   | 0.115315948  | 3.064874582  | 0.00226167  | 0.004977842 | no |
| LIX1     | -0.115310468 | -3.064726975 | 0.002262772 | 0.004979724 | no |
| DHX8     | 0.115304059  | 3.064554342  | 0.002264061 | 0.004982017 | no |
| IDH3B    | -0.115274685 | -3.063763109 | 0.002269976 | 0.004994491 | no |
| SNRPB2   | 0.115246615  | 3.06300702   | 0.002275642 | 0.005006412 | no |
| SLC22A7  | -0.115237994 | -3.062774819 | 0.002277384 | 0.005009701 | no |
| GPR89C   | 0.115234583  | 3.062682945  | 0.002278074 | 0.005010673 | no |
| MYO5C    | 0.115222656  | 3.062361695  | 0.002280488 | 0.005015436 | no |
| APOB     | 0.115210197  | 3.062026094  | 0.002283012 | 0.005020441 | no |
| HEPN1    | -0.115194308 | -3.061598112 | 0.002286234 | 0.005026981 | no |
| USP36    | -0.115170258 | -3.060950337 | 0.00229112  | 0.005037175 | no |
| PSMD6    | 0.115158225  | 3.060626226  | 0.002293568 | 0.005042008 | no |
| ABL2     | -0.115136789 | -3.060048869 | 0.002297934 | 0.005051058 | no |
| FADS6    | -0.115117108 | -3.059518754 | 0.00230195  | 0.005059336 | no |
| C18orf55 | -0.115114908 | -3.059459503 | 0.0023024   | 0.005059773 | no |
| PLCXD1   | -0.115110323 | -3.059336    | 0.002303336 | 0.005061282 | no |
| SHE      | 0.115100923  | 3.05908283   | 0.002305258 | 0.005064953 | no |
| SIRT5    | -0.115085651 | -3.058671483 | 0.002308382 | 0.005071268 | no |
| VWC2L    | -0.115075591 | -3.058400539 | 0.002310443 | 0.005075243 | no |
| AGTR1    | 0.115029608  | 3.05716204   | 0.002319882 | 0.005094925 | no |
| PABPC1L  | 0.115029487  | 3.057158787  | 0.002319907 | 0.005094925 | no |
| IGF2BP3  | 0.115012442  | 3.056699688  | 0.002323415 | 0.005102076 | no |
| MESTIT1  | -0.115010228 | -3.056640068 | 0.002323871 | 0.005102523 | no |
| XKRY2    | 0.114998936  | 3.056335938  | 0.002326198 | 0.005107078 | no |
| SYT6     | -0.114993886 | -3.056199926 | 0.00232724  | 0.005108809 | no |
| KDM5B    | -0.114974786 | -3.055685503 | 0.002331182 | 0.005116909 | no |
| ERN2     | 0.114965717  | 3.055441254  | 0.002333057 | 0.005120467 | no |
| LRRC37A  | -0.114953523 | -3.055112841 | 0.002335579 | 0.005125445 | no |
| C3orf15  | 0.114949088  | 3.054993384  | 0.002336497 | 0.005126904 | no |
| EHF      | 0.114940819  | 3.054770685  | 0.002338209 | 0.005130104 | no |
| NEFM     | -0.114927995 | -3.054425282 | 0.002340867 | 0.005135379 | no |
| RPUSD2   | -0.114922321 | -3.054272475 | 0.002342044 | 0.005137403 | no |
| FBXW7    | -0.114920118 | -3.054213146 | 0.002342501 | 0.005137848 | no |
| MATK     | -0.114905268 | -3.053813184 | 0.002345584 | 0.00514401  | no |
| COL4A6   | 0.114904136  | 3.053782705  | 0.002345819 | 0.00514401  | no |
| ZNF676   | -0.114886124 | -3.053297602 | 0.002349564 | 0.005151664 | no |
| UBN1     | 0.114883581  | 3.053229127  | 0.002350093 | 0.005152265 | no |
| EDA2R    | 0.114874858  | 3.052994182  | 0.002351909 | 0.005155687 | no |
| CTNNA2   | -0.114870349 | -3.05287274  | 0.002352849 | 0.005157187 | no |
| BSND     | 0.114862802  | 3.052669487  | 0.002354421 | 0.005160075 | no |
| RAET1E   | 0.114849466  | 3.052310329  | 0.002357203 | 0.005165611 | no |
| GAD2     | -0.114821824 | -3.05156587  | 0.002362978 | 0.005177706 | no |
| BAGE2    | -0.114798784 | -3.050945371 | 0.002367801 | 0.005187712 | no |
| ALKBH4   | -0.114780114 | -3.050442577 | 0.002371716 | 0.005195727 | no |
| RPA2     | 0.114777887  | 3.050382595  | 0.002372184 | 0.005196188 | no |

|              |              |              |             |             |    |
|--------------|--------------|--------------|-------------|-------------|----|
| MGST3        | 0.114747357  | 3.049560406  | 0.0023786   | 0.005209677 | no |
| SELE         | 0.114727877  | 3.049035785  | 0.002382702 | 0.005218097 | no |
| HMGB1        | -0.114703934 | -3.048390981 | 0.002387753 | 0.005228314 | no |
| CD160        | -0.11470331  | -3.048374183 | 0.002387885 | 0.005228314 | no |
| PPIAL4E      | 0.11469819   | 3.048236287  | 0.002388966 | 0.005230116 | no |
| EMX20S       | -0.114685331 | -3.047890004 | 0.002391684 | 0.005235499 | no |
| SLC25A35     | 0.114680956  | 3.047772169  | 0.002392609 | 0.005236958 | no |
| SDCBP2       | -0.114650642 | -3.046955818 | 0.00239903  | 0.005250443 | no |
| HIST1H2BH    | 0.114604344  | 3.04570901   | 0.002408867 | 0.005271401 | no |
| LBH          | 0.114598933  | 3.045563317  | 0.002410019 | 0.005273351 | no |
| CSTF1        | 0.114588203  | 3.045274364  | 0.002412305 | 0.005277781 | no |
| RHBDF1       | 0.114552452  | 3.044311601  | 0.002419936 | 0.005293904 | no |
| TRHDE        | -0.114497882 | -3.042842086 | 0.002431626 | 0.005318903 | no |
| LRRC31       | 0.114480911  | 3.042385099  | 0.002435272 | 0.005326302 | no |
| TMEM161B     | -0.114479004 | -3.042333732 | 0.002435682 | 0.00532646  | no |
| ZNF37A       | -0.114478123 | -3.042310027 | 0.002435872 | 0.00532646  | no |
| LOC100144603 | 0.114471688  | 3.042136723  | 0.002437256 | 0.005328911 | no |
| TRAM1L1      | -0.114436207 | -3.041181306 | 0.0024449   | 0.005345047 | no |
| DGKZ         | -0.114418833 | -3.040713444 | 0.002448652 | 0.005352338 | no |
| CACNG3       | -0.114418309 | -3.040699356 | 0.002448765 | 0.005352338 | no |
| FAM182A      | -0.114374435 | -3.039517915 | 0.002458262 | 0.005372246 | no |
| CCDC138      | 0.114373779  | 3.039500265  | 0.002458404 | 0.005372246 | no |
| ABCB7        | 0.114358523  | 3.039089446  | 0.002461715 | 0.005378899 | no |
| NPHS1        | -0.114311111 | -3.037812793 | 0.002472029 | 0.005400851 | no |
| RNF44        | -0.114302729 | -3.03758709  | 0.002473856 | 0.00540426  | no |
| STRAP        | -0.114300139 | -3.037517355 | 0.002474421 | 0.00540491  | no |
| MOSPD1       | 0.114280409  | 3.036986094  | 0.002478728 | 0.005413733 | no |
| LRRC18       | 0.114278421  | 3.036932549  | 0.002479163 | 0.005414098 | no |
| CEBPZ        | -0.114258145 | -3.036386589 | 0.002483597 | 0.005423196 | no |
| POMGNT1      | 0.114230829  | 3.035651087  | 0.002489583 | 0.005435679 | no |
| VAC14        | -0.114224812 | -3.035489061 | 0.002490903 | 0.005437974 | no |
| DOC2A        | -0.114191965 | -3.03460463  | 0.002498122 | 0.005452872 | no |
| PLD6         | -0.114191305 | -3.034586874 | 0.002498267 | 0.005452872 | no |
| SHOX2        | 0.114162105  | 3.033800646  | 0.0025047   | 0.005466324 | no |
| ADRBK1       | 0.11414885   | 3.033443737  | 0.002507626 | 0.005472118 | no |
| NUPL1        | -0.114142581 | -3.033274949 | 0.00250901  | 0.005474452 | no |
| SYS1-DBNDD2  | -0.114141557 | -3.033247363 | 0.002509237 | 0.005474452 | no |
| FAM175A      | 0.114132346  | 3.03299936   | 0.002511272 | 0.005478302 | no |
| ANGEL1       | -0.114130873 | -3.032959713 | 0.002511598 | 0.005478422 | no |
| SLM01        | -0.114124099 | -3.032777323 | 0.002513096 | 0.005481099 | no |
| CXorf59      | 0.114116843  | 3.032581942  | 0.002514702 | 0.005483503 | no |
| ZZZ3         | 0.114116668  | 3.032577227  | 0.002514741 | 0.005483503 | no |
| ABCA5        | 0.114074956  | 3.031454142  | 0.002523991 | 0.005503079 | no |
| GABRA4       | -0.114038227 | -3.030465251 | 0.002532162 | 0.005520298 | no |
| DIABLO       | -0.114019313 | -3.029955988 | 0.002536379 | 0.005528896 | no |
| DHRS4        | -0.114016538 | -3.029881273 | 0.002536998 | 0.005529649 | no |
| C15orf52     | 0.11401477   | 3.029833693  | 0.002537393 | 0.005529913 | no |
| PITPNM3      | -0.114006465 | -3.029610087 | 0.002539247 | 0.005533358 | no |
| PTRH1        | 0.113995064  | 3.029303125  | 0.002541795 | 0.005538095 | no |
| NHEJ1        | 0.113994287  | 3.029282193  | 0.002541968 | 0.005538095 | no |
| PRR25        | -0.113992204 | -3.029226105 | 0.002542434 | 0.005538513 | no |

|           |              |              |             |             |    |
|-----------|--------------|--------------|-------------|-------------|----|
| CA7       | -0.113966903 | -3.028544917 | 0.002548097 | 0.005550252 | no |
| KPNA7     | 0.113954017  | 3.028197993  | 0.002550986 | 0.005555945 | no |
| SETX      | 0.113951718  | 3.028136086  | 0.002551502 | 0.00555647  | no |
| IGF2BP2   | 0.113947654  | 3.028026677  | 0.002552414 | 0.005557857 | no |
| SLC9A5    | -0.113924413 | -3.027400941 | 0.002557634 | 0.005568547 | no |
| ZNF449    | 0.113923346  | 3.02737222   | 0.002557874 | 0.005568547 | no |
| SMARCE1   | 0.113911678  | 3.02705809   | 0.002560499 | 0.005573661 | no |
| VWA3B     | 0.113887457  | 3.026405982  | 0.002565955 | 0.005584938 | no |
| KCNJ12    | -0.113874962 | -3.026069573 | 0.002568775 | 0.005590472 | no |
| C9orf5    | -0.113864603 | -3.025790679 | 0.002571114 | 0.005594961 | no |
| RYR3      | 0.113861645  | 3.025711035  | 0.002571782 | 0.005595813 | no |
| FAM180B   | 0.113840819  | 3.025150357  | 0.002576492 | 0.005605457 | no |
| C4orf39   | -0.113827585 | -3.024794066 | 0.002579489 | 0.005611374 | no |
| ANKRD27   | 0.113816146  | 3.024486117  | 0.002582082 | 0.00561641  | no |
| THOC7     | 0.113807846  | 3.024262659  | 0.002583965 | 0.005619509 | no |
| GAB2      | -0.113807418 | -3.02425112  | 0.002584062 | 0.005619509 | no |
| EHMT1     | -0.113800984 | -3.024077905 | 0.002585523 | 0.00562208  | no |
| WDR5      | -0.113768843 | -3.023212623 | 0.00259283  | 0.005637363 | no |
| ABCB10    | 0.113762261  | 3.023035413  | 0.002594329 | 0.005639735 | no |
| ACBD4     | -0.113761604 | -3.023017741 | 0.002594479 | 0.005639735 | no |
| ANO3      | -0.113738203 | -3.022387743 | 0.002599814 | 0.005650287 | no |
| PPP1R12A  | -0.113737861 | -3.022378519 | 0.002599892 | 0.005650287 | no |
| TMLHE     | -0.11373171  | -3.022212927 | 0.002601296 | 0.005652731 | no |
| CUL3      | -0.113722722 | -3.021970957 | 0.002603349 | 0.005656585 | no |
| LOC339788 | -0.113716012 | -3.021790315 | 0.002604883 | 0.005659309 | no |
| ENO1      | 0.113690601  | 3.021106219  | 0.002610698 | 0.005671333 | no |
| SERPINF1  | 0.113685628  | 3.020972343  | 0.002611838 | 0.005673199 | no |
| AP1AR     | 0.113682558  | 3.020889708  | 0.002612541 | 0.005674118 | no |
| BRCA2     | 0.113677274  | 3.020747452  | 0.002613753 | 0.005676139 | no |
| KRT75     | 0.113670169  | 3.020556194  | 0.002615383 | 0.005679069 | no |
| BEX5      | -0.113653717 | -3.020113287 | 0.00261916  | 0.005686661 | no |
| PLEKHG4   | 0.113622117  | 3.019262587  | 0.00262643  | 0.005701832 | no |
| CYB5B     | 0.113616188  | 3.019102994  | 0.002627796 | 0.005704185 | no |
| FAM13B    | 0.113592882  | 3.018475577  | 0.002633172 | 0.005715241 | no |
| C9orf106  | 0.113584819  | 3.018258519  | 0.002635034 | 0.005718669 | no |
| PAQR9     | -0.113582999 | -3.018209527 | 0.002635455 | 0.005718968 | no |
| SDHB      | 0.113557702  | 3.017528546  | 0.002641306 | 0.005731049 | no |
| C9orf110  | 0.113552345  | 3.017384315  | 0.002642546 | 0.005733126 | no |
| C10orf82  | -0.113547495 | -3.017253774 | 0.00264367  | 0.005734948 | no |
| PRDX1     | 0.113518483  | 3.016472787  | 0.0026504   | 0.005748932 | no |
| ENGASE    | -0.113501741 | -3.016022101 | 0.002654292 | 0.005756755 | no |
| GLT1D1    | -0.113432196 | -3.014150024 | 0.002670511 | 0.00579131  | no |
| DDX55     | -0.11340191  | -3.013334766 | 0.002677602 | 0.005806066 | no |
| CCDC110   | 0.113392319  | 3.013076578  | 0.002679852 | 0.00581032  | no |
| ADA       | 0.113361189  | 3.012238626  | 0.002687164 | 0.00582555  | no |
| TWF1      | 0.113355103  | 3.012074805  | 0.002688596 | 0.005828029 | no |
| GCFC1     | -0.113339812 | -3.011663215 | 0.002692196 | 0.005835208 | no |
| KLF8      | 0.113278772  | 3.010020162  | 0.002706612 | 0.005865825 | no |
| AHCYL1    | -0.113263366 | -3.009605478 | 0.002710262 | 0.005873105 | no |
| C6orf138  | 0.113237846  | 3.008918559  | 0.002716317 | 0.005885596 | no |
| ZNF177    | -0.113232035 | -3.008762153 | 0.002717697 | 0.005887956 | no |



|           |              |              |             |             |    |
|-----------|--------------|--------------|-------------|-------------|----|
| SLC30A3   | -0.113199221 | -3.007878906 | 0.002725505 | 0.005904058 | no |
| C14orf128 | -0.113198346 | -3.007855363 | 0.002725714 | 0.005904058 | no |
| EML3      | 0.113191384  | 3.007667955  | 0.002727373 | 0.00590702  | no |
| RCC1      | 0.113189004  | 3.007603896  | 0.002727941 | 0.005907224 | no |
| GGT6      | 0.113188537  | 3.007591338  | 0.002728052 | 0.005907224 | no |
| APBB3     | -0.113155026 | -3.006689337 | 0.002736053 | 0.005923916 | no |
| PIIP5K2   | 0.113146278  | 3.006453872  | 0.002738146 | 0.005927812 | no |
| ZNF518A   | -0.11312916  | -3.005993123 | 0.002742244 | 0.005936049 | no |
| ZNF138    | -0.113106206 | -3.005375308 | 0.002747749 | 0.005947327 | no |
| NOC4L     | -0.113101597 | -3.005251247 | 0.002748855 | 0.005949085 | no |
| MURC      | -0.113099442 | -3.005193261 | 0.002749373 | 0.005949568 | no |
| LOC91149  | -0.113094972 | -3.005072935 | 0.002750446 | 0.005951255 | no |
| CLCNKB    | 0.113071987  | 3.004454292  | 0.002755973 | 0.005962576 | no |
| ZSCAN18   | -0.113069775 | -3.004394752 | 0.002756506 | 0.00596309  | no |
| TUBE1     | -0.113065504 | -3.004279788 | 0.002757534 | 0.005964676 | no |
| RPS6KB1   | -0.113049479 | -3.003848483 | 0.002761395 | 0.005972389 | no |
| C14orf162 | -0.113035841 | -3.003481427 | 0.002764685 | 0.005978558 | no |
| CORO1C    | -0.113035205 | -3.003464297 | 0.002764839 | 0.005978558 | no |
| TENC1     | -0.113021319 | -3.003090568 | 0.002768193 | 0.005985169 | no |
| LIN7B     | -0.113018652 | -3.003018771 | 0.002768837 | 0.005985923 | no |
| CDH8      | -0.11301452  | -3.002907572 | 0.002769836 | 0.005987442 | no |
| RFK       | 0.11299789   | 3.002459972  | 0.00277386  | 0.005995499 | no |
| HEYL      | 0.112986651  | 3.002157489  | 0.002776582 | 0.006000741 | no |
| TPPP      | -0.112976376 | -3.001880935 | 0.002779073 | 0.006005482 | no |
| C10orf108 | 0.112970061  | 3.001710969  | 0.002780605 | 0.006008151 | no |
| SPATA4    | 0.112960032  | 3.001441037  | 0.002783039 | 0.006012768 | no |
| BRD2      | -0.112942949 | -3.000981262 | 0.00278719  | 0.006021094 | no |
| TMEM155   | -0.1129398   | -3.000896508 | 0.002787956 | 0.006022104 | no |
| KLF1      | -0.112923809 | -3.000466143 | 0.002791848 | 0.006029867 | no |
| EIF2B3    | 0.11292231   | 3.000425801  | 0.002792213 | 0.006030011 | no |
| UTP18     | 0.112908217  | 3.000046501  | 0.002795647 | 0.006036783 | no |
| HMMR      | 0.112883655  | 2.999385455  | 0.002801642 | 0.006049082 | no |
| EHBP1     | 0.112877342  | 2.999215527  | 0.002803185 | 0.006051767 | no |
| CWC15     | -0.112869877 | -2.999014635 | 0.00280501  | 0.006055061 | no |
| RNF128    | 0.112866956  | 2.998936012  | 0.002805725 | 0.006055957 | no |
| KIAA0528  | -0.112856417 | -2.998652386 | 0.002808304 | 0.006060877 | no |
| PLEKHA7   | 0.112850489  | 2.99849283   | 0.002809756 | 0.006063055 | no |
| TDRD6     | -0.112849847 | -2.998475562 | 0.002809913 | 0.006063055 | no |
| DIS3      | -0.112826346 | -2.997843059 | 0.002815676 | 0.006074841 | no |
| GJA3      | 0.112803898  | 2.997238926  | 0.00282119  | 0.006086088 | no |
| CTAGE6    | 0.112790645  | 2.996882264  | 0.00282445  | 0.006092471 | no |
| HOXD13    | 0.112763676  | 2.996156438  | 0.002831095 | 0.006106153 | no |
| STXBP5    | -0.112757021 | -2.995977348 | 0.002832737 | 0.006109042 | no |
| PROK1     | 0.112751377  | 2.99582545   | 0.00283413  | 0.006111001 | no |
| CCT6B     | -0.112750893 | -2.995812439 | 0.002834249 | 0.006111001 | no |
| VSNL1     | -0.112748586 | -2.995750339 | 0.002834819 | 0.006111578 | no |
| MORN2     | 0.112741872  | 2.995569649  | 0.002836478 | 0.006114501 | no |
| C11orf74  | -0.112738056 | -2.995466952 | 0.002837421 | 0.006115882 | no |
| NEU3      | -0.112723659 | -2.995079502 | 0.002840981 | 0.006122903 | no |
| TREX2     | 0.112711323  | 2.994747508  | 0.002844035 | 0.006128831 | no |
| PP14571   | -0.112676093 | -2.99379942  | 0.002852773 | 0.006147006 | no |

|              |              |              |             |             |    |
|--------------|--------------|--------------|-------------|-------------|----|
| PTPRZ1       | -0.112666004 | -2.993527897 | 0.00285528  | 0.006151752 | no |
| RPL13A       | -0.112664481 | -2.99348691  | 0.002855658 | 0.006151912 | no |
| ZFP14        | -0.112635773 | -2.992714342 | 0.002862803 | 0.006166214 | no |
| AGAP6        | -0.112635356 | -2.992703125 | 0.002862907 | 0.006166214 | no |
| PMM1         | -0.112629537 | -2.992546519 | 0.002864357 | 0.006168681 | no |
| SST          | -0.112620308 | -2.992298163 | 0.002866659 | 0.00617298  | no |
| ROB01        | -0.112616024 | -2.992182864 | 0.002867728 | 0.006174624 | no |
| SH2B2        | -0.112609482 | -2.992006823 | 0.002869361 | 0.006177482 | no |
| MAP2K4       | -0.112601916 | -2.991803203 | 0.002871251 | 0.006180893 | no |
| IGFBP3       | 0.112584086  | 2.991323405  | 0.002875708 | 0.006189792 | no |
| PCNP         | 0.112582932  | 2.99129233   | 0.002875997 | 0.006189792 | no |
| ZSWIM6       | -0.112581562 | -2.991255477 | 0.00287634  | 0.006189871 | no |
| SV2B         | -0.112578167 | -2.991164122 | 0.002877189 | 0.00619104  | no |
| FNBP4        | -0.112574935 | -2.991077144 | 0.002877998 | 0.006192122 | no |
| SLC6A7       | -0.112569308 | -2.990925696 | 0.002879408 | 0.006194495 | no |
| 10-Mar       | 0.112540574  | 2.990152458  | 0.002886613 | 0.006209336 | no |
| HAGHL        | -0.112491693 | -2.988837076 | 0.002898909 | 0.006235121 | no |
| SLBP         | 0.112468535  | 2.988213877  | 0.002904751 | 0.006247022 | no |
| OGDH         | 0.112462559  | 2.988053071  | 0.00290626  | 0.006249603 | no |
| 9-Sep        | 0.112459201  | 2.987962702  | 0.002907108 | 0.006250762 | no |
| FOXD4L5      | -0.112441168 | -2.987477463 | 0.002911668 | 0.0062599   | no |
| AP3M2        | -0.112439185 | -2.98742409  | 0.00291217  | 0.006260314 | no |
| C7orf46      | 0.112424751  | 2.987035687  | 0.002915825 | 0.006267504 | no |
| NFS1         | -0.112387899 | -2.986044028 | 0.002925176 | 0.006286935 | no |
| SLC5A9       | 0.112384135  | 2.98594275   | 0.002926132 | 0.006288323 | no |
| ENPP5        | 0.112361337  | 2.985329266  | 0.002931932 | 0.006300118 | no |
| ACCN1        | -0.112359653 | -2.985283956 | 0.002932361 | 0.00630037  | no |
| VSIG1        | 0.112344446  | 2.984874755  | 0.002936236 | 0.006307437 | no |
| FANCF        | 0.112344296  | 2.984870731  | 0.002936274 | 0.006307437 | no |
| OVGP1        | -0.112251604 | -2.982376545 | 0.002959996 | 0.006357648 | no |
| ZFP106       | 0.112250508  | 2.982347063  | 0.002960278 | 0.006357648 | no |
| DNAJC8       | 0.112225454  | 2.981672907  | 0.00296672  | 0.006370807 | no |
| DCUN1D5      | 0.112213175  | 2.981342525  | 0.002969882 | 0.00637692  | no |
| GABRB2       | -0.112194566 | -2.980841798 | 0.00297468  | 0.006386544 | no |
| AGAP2        | -0.112164596 | -2.980035411 | 0.002982422 | 0.006402486 | no |
| ARMC7        | 0.112160279  | 2.979919253  | 0.002983539 | 0.006404203 | no |
| FUT3         | -0.112143121 | -2.979457581 | 0.002987981 | 0.006413057 | no |
| C9orf131     | -0.112138636 | -2.979336907 | 0.002989143 | 0.006414221 | no |
| LRPAP1       | 0.11213858   | 2.979335378  | 0.002989158 | 0.006414221 | no |
| ZFP90        | -0.112133728 | -2.979204838 | 0.002990415 | 0.006416239 | no |
| USP5         | -0.112127738 | -2.979043674 | 0.002991969 | 0.00641889  | no |
| TOMM5        | 0.112123372  | 2.978926186  | 0.002993102 | 0.006420639 | no |
| PRSS3        | -0.112115017 | -2.978701379 | 0.00299527  | 0.00642461  | no |
| ABCF2        | 0.112094687  | 2.978154385  | 0.003000553 | 0.006435258 | no |
| RDH16        | -0.112054537 | -2.977074117 | 0.003011011 | 0.006457002 | no |
| LOC100130522 | -0.112045962 | -2.976843383 | 0.003013249 | 0.006461116 | no |
| DKKL1        | 0.112034193  | 2.976526721  | 0.003016323 | 0.006467022 | no |
| LOC151009    | -0.1120153   | -2.976018401 | 0.003021263 | 0.006476398 | no |
| LOC284798    | -0.112015019 | -2.976010832 | 0.003021337 | 0.006476398 | no |
| TIMM17A      | 0.112001548  | 2.975648405  | 0.003024864 | 0.006483271 | no |
| GPR20        | 0.111998582  | 2.975568601  | 0.003025641 | 0.00648425  | no |

|           |              |              |             |             |    |
|-----------|--------------|--------------|-------------|-------------|----|
| DTNBP1    | 0.111977054  | 2.974989381  | 0.003031287 | 0.006495661 | no |
| LOC399959 | -0.111948005 | -2.97420782  | 0.003038921 | 0.006511329 | no |
| EGR1      | 0.111938182  | 2.973943537  | 0.003041506 | 0.006516178 | no |
| PAIP2B    | -0.111923929 | -2.973560056 | 0.003045261 | 0.006523531 | no |
| FRAT2     | -0.111910815 | -2.97320723  | 0.003048719 | 0.006530248 | no |
| ADCK4     | 0.111909106  | 2.973161254  | 0.00304917  | 0.006530522 | no |
| CD300LD   | 0.111902835  | 2.972992518  | 0.003050826 | 0.006533375 | no |
| LOC647946 | 0.111884237  | 2.97249215   | 0.00305574  | 0.006543205 | no |
| AGPAT3    | -0.111863554 | -2.971935698 | 0.003061213 | 0.006554231 | no |
| VEZFI     | -0.111845317 | -2.971445059 | 0.003066046 | 0.006563884 | no |
| LRRIQ1    | 0.111835508  | 2.971181147  | 0.003068649 | 0.00656876  | no |
| IQCK      | -0.111823287 | -2.97085235  | 0.003071894 | 0.006575011 | no |
| SPATA9    | -0.11181963  | -2.970753968 | 0.003072866 | 0.006576395 | no |
| HOXA6     | 0.111815886  | 2.97065323   | 0.003073861 | 0.006577829 | no |
| GINS3     | -0.111794436 | -2.97007615  | 0.003079568 | 0.006589344 | no |
| DDX19A    | -0.11179294  | -2.970035906 | 0.003079966 | 0.006589499 | no |
| ZNF518B   | 0.111780333  | 2.96969673   | 0.003083326 | 0.006595988 | no |
| N6AMT1    | -0.111760573 | -2.969165138 | 0.003088597 | 0.006606566 | no |
| MYO9A     | -0.111725201 | -2.968213521 | 0.003098055 | 0.006626094 | no |
| MXD4      | -0.111717544 | -2.968007517 | 0.003100105 | 0.006629779 | no |
| FOXC2     | 0.111691287  | 2.96730113   | 0.003107147 | 0.006644135 | no |
| SPDEF     | -0.111666043 | -2.966622009 | 0.003113931 | 0.006657937 | no |
| SUMO2     | -0.11163783  | -2.965863005 | 0.003121528 | 0.006673476 | no |
| HPR       | -0.111623784 | -2.965485139 | 0.003125317 | 0.006680869 | no |
| SOCS2     | 0.111592824  | 2.96465227   | 0.003133683 | 0.006698044 | no |
| NAV2      | -0.111566328 | -2.963939485 | 0.003140858 | 0.006712672 | no |
| PACS2     | -0.111551702 | -2.963546019 | 0.003144826 | 0.006720441 | no |
| ADRA1B    | -0.111440369 | -2.960551088 | 0.003175176 | 0.006784581 | no |
| LOC401431 | -0.11142875  | -2.960238519 | 0.003178359 | 0.006790664 | no |
| CD9       | 0.111356002  | 2.958281619  | 0.003198352 | 0.006832658 | no |
| SLC35E2   | -0.111347492 | -2.958052687 | 0.003200698 | 0.006836948 | no |
| PIPOX     | 0.111342869  | 2.957928336  | 0.003201973 | 0.00683895  | no |
| GRK5      | 0.111334509  | 2.957703456  | 0.003204281 | 0.006843155 | no |
| LOC284578 | -0.111320681 | -2.957331486 | 0.0032081   | 0.006850589 | no |
| SCUBE2    | 0.111306607  | 2.956952909  | 0.003211992 | 0.006858175 | no |
| C12orf45  | 0.111304191  | 2.956887928  | 0.003212661 | 0.006858878 | no |
| IRF4      | 0.111292243  | 2.956566541  | 0.003215969 | 0.006865215 | no |
| PRKCG     | -0.111275098 | -2.956105363 | 0.003220721 | 0.006874634 | no |
| C1orf110  | 0.111263462  | 2.955792364  | 0.00322395  | 0.0068808   | no |
| AOC2      | -0.111225017 | -2.954758256 | 0.003234639 | 0.006902885 | no |
| TIGD5     | -0.111221976 | -2.954676462 | 0.003235486 | 0.006903963 | no |
| GOLGA6L5  | -0.111220567 | -2.954638563 | 0.003235878 | 0.006904072 | no |
| CKS1B     | 0.111218254  | 2.95457635   | 0.003236523 | 0.006904718 | no |
| SULT2B1   | 0.111197855  | 2.954027653  | 0.00324221  | 0.006916123 | no |
| PLXNA2    | -0.111195759 | -2.953971268 | 0.003242795 | 0.006916641 | no |
| SLC26A6   | 0.111193771  | 2.953917782  | 0.00324335  | 0.006917095 | no |
| PNPLA5    | -0.111154175 | -2.952852739 | 0.00325442  | 0.006939971 | no |
| DAZL      | 0.111149012  | 2.952713866  | 0.003255866 | 0.006942323 | no |
| C14orf73  | 0.111121064  | 2.951962142  | 0.003263703 | 0.0069583   | no |
| FUT10     | 0.11109833   | 2.951350658  | 0.003270091 | 0.006971183 | no |
| ZMAT4     | -0.111083735 | -2.950958093 | 0.003274198 | 0.006979203 | no |

|           |              |              |             |             |    |
|-----------|--------------|--------------|-------------|-------------|----|
| CACNA2D1  | -0.111067745 | -2.950528012 | 0.003278703 | 0.006988068 | no |
| MAP3K5    | -0.111048131 | -2.950000449 | 0.003284236 | 0.006999124 | no |
| SCARA3    | 0.111031182  | 2.949544566  | 0.003289025 | 0.007008591 | no |
| CHST5     | -0.111029398 | -2.949496607 | 0.003289529 | 0.007008926 | no |
| RAB39     | 0.11101867   | 2.949208051  | 0.003292564 | 0.007014245 | no |
| MORN5     | 0.111018121  | 2.94919329   | 0.003292719 | 0.007014245 | no |
| SLC4A2    | 0.111015824  | 2.949131494  | 0.003293369 | 0.007014891 | no |
| NPNT      | 0.110992751  | 2.948510933  | 0.003299906 | 0.007028073 | no |
| LOC388242 | 0.1109787    | 2.948133015  | 0.003303892 | 0.007035822 | no |
| FAM122B   | 0.110941949  | 2.947144548  | 0.00331434  | 0.007057328 | no |
| CASD1     | -0.11093688  | -2.947008221 | 0.003315783 | 0.007059658 | no |
| SH2D5     | -0.110930909 | -2.94684761  | 0.003317484 | 0.00706225  | no |
| ZNF287    | -0.110930153 | -2.946827291 | 0.0033177   | 0.00706225  | no |
| ST70T1    | -0.110912976 | -2.946365312 | 0.003322598 | 0.007071931 | no |
| LOC143666 | -0.110905657 | -2.946168459 | 0.003324686 | 0.007075633 | no |
| ARL15     | 0.110878315  | 2.945433085  | 0.003332501 | 0.007091517 | no |
| LOC654433 | 0.110861123  | 2.944970701  | 0.003337423 | 0.007101243 | no |
| RLTPR     | -0.110859226 | -2.944919685 | 0.003337966 | 0.007101652 | no |
| PPP2R1B   | 0.110852374  | 2.944735406  | 0.00333993  | 0.007105083 | no |
| HOXB1     | 0.110839642  | 2.944392968  | 0.003343582 | 0.007112103 | no |
| HNRNPD    | -0.110807854 | -2.943538034 | 0.003352716 | 0.007130781 | no |
| NR1D1     | -0.110799306 | -2.943308144 | 0.003355175 | 0.007135262 | no |
| LYPLAL1   | 0.110785177  | 2.942928161  | 0.003359245 | 0.007143165 | no |
| HS6ST1    | 0.110776235  | 2.942687658  | 0.003361823 | 0.007147895 | no |
| MAP3K13   | -0.110756588 | -2.942159291 | 0.003367493 | 0.007159198 | no |
| MGC16025  | -0.110745427 | -2.941859117 | 0.003370718 | 0.007165301 | no |
| BUD31     | 0.11072238   | 2.941239282  | 0.003377387 | 0.007178722 | no |
| TLE1      | -0.110716215 | -2.941073497 | 0.003379173 | 0.007181763 | no |
| DTWD1     | 0.110711804  | 2.940954868  | 0.003380451 | 0.007183724 | no |
| RCC2      | 0.110673632  | 2.93992829   | 0.003391531 | 0.007206514 | no |
| FOXR1     | -0.110610283 | -2.938224641 | 0.003409992 | 0.00724498  | no |
| VIPR1     | -0.110603355 | -2.938038313 | 0.003412017 | 0.00724852  | no |
| HIST1H4F  | 0.11057077   | 2.93716202   | 0.003421554 | 0.007268016 | no |
| PROSC     | 0.110555474  | 2.936750675  | 0.003426039 | 0.007276778 | no |
| C16orf92  | -0.110546017 | -2.936496363 | 0.003428814 | 0.007281908 | no |
| ABCF1     | -0.110541226 | -2.936367518 | 0.003430221 | 0.007284131 | no |
| LEFTY2    | 0.110525024  | 2.935931811  | 0.003434983 | 0.007293477 | no |
| GSG1L     | -0.110515586 | -2.935678008 | 0.00343776  | 0.007298606 | no |
| LOC649330 | -0.110505477 | -2.935406148 | 0.003440736 | 0.007304158 | no |
| FAM161A   | -0.110493194 | -2.935075854 | 0.003444355 | 0.007311074 | no |
| LCN12     | -0.110472393 | -2.934516475 | 0.003450493 | 0.007323332 | no |
| C6orf52   | -0.110432001 | -2.933430291 | 0.003462439 | 0.007347915 | no |
| SGPP2     | -0.110421336 | -2.933143473 | 0.0034656   | 0.007353568 | no |
| ADAT3     | 0.110420558  | 2.933122577  | 0.00346583  | 0.007353568 | no |
| SEMA4A    | -0.110408042 | -2.932785999 | 0.003469543 | 0.007360673 | no |
| ABHD10    | -0.110399237 | -2.932549209 | 0.003472157 | 0.007365446 | no |
| ACCN5     | 0.110397461  | 2.932501455  | 0.003472684 | 0.007365792 | no |
| FM09P     | 0.110386595  | 2.932209277  | 0.003475913 | 0.007371867 | no |
| INO80B    | -0.110379174 | -2.932009713 | 0.00347812  | 0.007375773 | no |
| CG030     | -0.11035078  | -2.931246171 | 0.003486575 | 0.007392927 | no |
| COX10     | -0.110345114 | -2.931093808 | 0.003488264 | 0.007395734 | no |

|           |              |              |             |             |    |
|-----------|--------------|--------------|-------------|-------------|----|
| C19orf69  | 0.110318152  | 2.930368816  | 0.003496313 | 0.007412022 | no |
| PCDHA5    | -0.110313561 | -2.93024536  | 0.003497685 | 0.007414154 | no |
| MED10     | 0.110278954  | 2.929314781  | 0.003508045 | 0.007435334 | no |
| ZNF598    | -0.110274995 | -2.929208305 | 0.003509232 | 0.007437071 | no |
| FEZ1      | -0.110266173 | -2.928971081 | 0.003511878 | 0.007441899 | no |
| TIGD6     | 0.110239858  | 2.92826349   | 0.003519782 | 0.007457535 | no |
| HECW2     | -0.110239151 | -2.928244478 | 0.003519995 | 0.007457535 | no |
| GPD1      | 0.110223952  | 2.927835798  | 0.003524568 | 0.007466441 | no |
| GREM2     | -0.110216813 | -2.927643843 | 0.003526717 | 0.007470212 | no |
| PSMG1     | 0.110210978  | 2.927486934  | 0.003528476 | 0.007472886 | no |
| TAS2R50   | -0.11021017  | -2.927465207 | 0.003528719 | 0.007472886 | no |
| GFOD1     | -0.110180075 | -2.926655972 | 0.003537799 | 0.007491331 | no |
| NSDHL     | -0.110176614 | -2.926562909 | 0.003538845 | 0.00749276  | no |
| RHOV      | -0.11016269  | -2.926188507 | 0.003543054 | 0.007500887 | no |
| TMEM114   | 0.110149113  | 2.925823453  | 0.003547163 | 0.007508799 | no |
| KRT86     | 0.110131508  | 2.925350068  | 0.003552498 | 0.007519304 | no |
| C10orf79  | 0.110129836  | 2.925305119  | 0.003553004 | 0.00751959  | no |
| C14orf181 | 0.110114068  | 2.924881144  | 0.003557789 | 0.007528928 | no |
| PAFAH1B3  | -0.110091457 | -2.924273172 | 0.00356466  | 0.007542679 | no |
| C11orf88  | 0.110081532  | 2.924006304  | 0.00356768  | 0.007548279 | no |
| SOX11     | -0.11007794  | -2.923909726 | 0.003568773 | 0.007549802 | no |
| RPSAP52   | 0.110057885  | 2.923370479  | 0.003574884 | 0.007561939 | no |
| LOC338651 | -0.110046858 | -2.923074009 | 0.003578248 | 0.007568263 | no |
| KRT32     | 0.110009057  | 2.922057625  | 0.003589802 | 0.007591906 | no |
| PLEKHN1   | 0.109975314  | 2.921150373  | 0.003600144 | 0.007612982 | no |
| OSBPL11   | -0.109921164 | -2.919694446 | 0.003616798 | 0.007647398 | no |
| LOC220729 | -0.10991012  | -2.919397503 | 0.003620203 | 0.007653311 | no |
| ACOT11    | 0.109909637  | 2.919384528  | 0.003620352 | 0.007653311 | no |
| KCTD11    | 0.109897082  | 2.919046955  | 0.003624226 | 0.007660702 | no |
| PIGR      | 0.10987658   | 2.91849575   | 0.003630561 | 0.00767329  | no |
| VSTM2L    | -0.109872502 | -2.918386117 | 0.003631823 | 0.007675153 | no |
| ANKHD1    | -0.109868758 | -2.918285437 | 0.003632981 | 0.007676799 | no |
| NGEF      | -0.109864313 | -2.918165922 | 0.003634357 | 0.007678904 | no |
| TMEM190   | 0.109832976  | 2.917323416  | 0.003644069 | 0.007698619 | no |
| MMP27     | 0.109816599  | 2.916883108  | 0.003649154 | 0.007708556 | no |
| HIPK4     | -0.109815076 | -2.916842165 | 0.003649627 | 0.00770875  | no |
| SLTM      | -0.109782829 | -2.915975181 | 0.003659659 | 0.007729133 | no |
| PTGIS     | 0.109763665  | 2.91545996   | 0.003665633 | 0.007740941 | no |
| PIK3C3    | 0.109761137  | 2.915391993  | 0.003666422 | 0.007741798 | no |
| GLP1R     | -0.109746246 | -2.914991637 | 0.003671071 | 0.007750805 | no |
| SLC15A1   | 0.109730342  | 2.914564067  | 0.003676042 | 0.00776049  | no |
| SLC12A8   | 0.109707304  | 2.913944688  | 0.003683254 | 0.007774903 | no |
| TRIM33    | -0.109705511 | -2.91389649  | 0.003683816 | 0.007775277 | no |
| KCNU1     | 0.109688119  | 2.913428911  | 0.003689269 | 0.007785975 | no |
| CGNL1     | 0.109674157  | 2.913053556  | 0.003693653 | 0.007794413 | no |
| RQCD1     | 0.109665113  | 2.912810416  | 0.003696494 | 0.007799596 | no |
| HRAS      | -0.109656413 | -2.91257651  | 0.00369923  | 0.007804554 | no |
| SMG6      | -0.109642722 | -2.912208452 | 0.003703539 | 0.00781219  | no |
| SRF       | 0.109642457  | 2.912201329  | 0.003703622 | 0.00781219  | no |
| SH2D3C    | 0.109629622  | 2.911856269  | 0.003707666 | 0.007819903 | no |
| OLFM3     | -0.109620156 | -2.911601779 | 0.003710651 | 0.007825382 | no |

|           |              |              |             |             |    |
|-----------|--------------|--------------|-------------|-------------|----|
| METAP1    | 0.109610823  | 2.911350867  | 0.003713596 | 0.007830776 | no |
| C9orf24   | 0.109609274  | 2.911309243  | 0.003714085 | 0.007830999 | no |
| PARVA     | 0.109598369  | 2.911016057  | 0.003717529 | 0.007837435 | no |
| FAM71A    | 0.109595876  | 2.910949037  | 0.003718317 | 0.007838279 | no |
| ORM1      | 0.109588073  | 2.910739276  | 0.003720783 | 0.007842666 | no |
| DKK4      | 0.109552195  | 2.909774734  | 0.003732144 | 0.007865787 | no |
| KRTAP13-2 | 0.109529149  | 2.909155206  | 0.003739458 | 0.007880388 | no |
| DHCR7     | -0.109512803 | -2.908715765 | 0.003744654 | 0.007890507 | no |
| PEF1      | 0.109511429  | 2.90867884   | 0.003745091 | 0.007890605 | no |
| ACPL2     | 0.109509812  | 2.908635358  | 0.003745605 | 0.007890867 | no |
| CENPW     | 0.109499059  | 2.908346302  | 0.003749028 | 0.007897253 | no |
| SELK      | -0.109468619 | -2.907527986 | 0.003758731 | 0.007916868 | no |
| AGBL3     | 0.109461047  | 2.907324434  | 0.003761148 | 0.007921134 | no |
| S100B     | 0.109458286  | 2.907250208  | 0.00376203  | 0.007922166 | no |
| RBM33     | -0.109448824 | -2.906995842 | 0.003765053 | 0.007927707 | no |
| MELK      | 0.109444259  | 2.906873113  | 0.003766512 | 0.007929954 | no |
| ABCB11    | 0.109404976  | 2.905817121  | 0.003779091 | 0.007955609 | no |
| BVES      | 0.109389065  | 2.905389401  | 0.003784197 | 0.007965529 | no |
| ZNF283    | 0.109382435  | 2.90521118   | 0.003786327 | 0.007969181 | no |
| LOC221442 | -0.109329874 | -2.903798261 | 0.003803247 | 0.00800396  | no |
| MLH1      | 0.109314993  | 2.903398239  | 0.00380805  | 0.008013233 | no |
| IRF9      | 0.109298943  | 2.902966804  | 0.003813236 | 0.008023312 | no |
| HSF5      | 0.109296226  | 2.902893759  | 0.003814114 | 0.008024325 | no |
| NKX2-5    | 0.109284383  | 2.90257541   | 0.003817946 | 0.008031551 | no |
| NAA38     | 0.109244153  | 2.901493988  | 0.003830989 | 0.008058149 | no |
| ZSCAN22   | 0.109235296  | 2.901255913  | 0.003833865 | 0.008063361 | no |
| STK24     | 0.109233662  | 2.901211992  | 0.003834396 | 0.008063639 | no |
| SKINTL    | 0.109206968  | 2.900494441  | 0.00384308  | 0.008081059 | no |
| SIRT6     | -0.10915935  | -2.899214484 | 0.003858614 | 0.008112879 | no |
| ANKRD35   | 0.109137403  | 2.898624537  | 0.003865793 | 0.008127128 | no |
| CYP2R1    | 0.109130455  | 2.898437778  | 0.003868068 | 0.008131066 | no |
| TSGA10    | 0.109090544  | 2.897364999  | 0.00388116  | 0.00815774  | no |
| PRR11     | 0.109082801  | 2.897156872  | 0.003883705 | 0.00816224  | no |
| ANKRD20B  | -0.109056571 | -2.896451856 | 0.003892336 | 0.00817953  | no |
| SLC38A11  | 0.10905432   | 2.896391336  | 0.003893078 | 0.008180238 | no |
| MAFF      | 0.109043866  | 2.896110358  | 0.003896524 | 0.008186627 | no |
| HOOK1     | -0.109036317 | -2.895907444 | 0.003899013 | 0.008191007 | no |
| MUT       | -0.10902188  | -2.895519395 | 0.003903779 | 0.008200167 | no |
| ALS2CL    | 0.108989308  | 2.89464393   | 0.00391455  | 0.008221938 | no |
| C5orf47   | -0.108986493 | -2.894568265 | 0.003915483 | 0.008223042 | no |
| CHRD      | -0.108919916 | -2.892778805 | 0.003937588 | 0.008268608 | no |
| LARS2     | -0.108917511 | -2.892714169 | 0.003938389 | 0.008269168 | no |
| UBE2I     | 0.108916657  | 2.892691209  | 0.003938673 | 0.008269168 | no |
| KIAA0564  | -0.108890055 | -2.891976209 | 0.003947539 | 0.008286923 | no |
| GRHL2     | 0.108874223  | 2.891550693  | 0.003952825 | 0.008297156 | no |
| ZNF20     | 0.108862922  | 2.891246951  | 0.003956601 | 0.008304222 | no |
| NPTX1     | -0.108853982 | -2.891006684 | 0.003959591 | 0.008309634 | no |
| VWDE      | 0.108844924  | 2.890763224  | 0.003962623 | 0.008315133 | no |
| ZNF41     | -0.108831129 | -2.890392452 | 0.003967244 | 0.008323966 | no |
| MAL2      | -0.108829574 | -2.890350658 | 0.003967765 | 0.008324195 | no |
| SYT14L    | -0.108795669 | -2.889439409 | 0.003979144 | 0.008347202 | no |

|              |              |              |             |             |    |
|--------------|--------------|--------------|-------------|-------------|----|
| ASCC2        | 0.10879081   | 2.889308826  | 0.003980777 | 0.008349762 | no |
| ESPNP        | -0.108780312 | -2.889026675 | 0.003984308 | 0.008355982 | no |
| C4orf44      | -0.108779535 | -2.88900578  | 0.003984569 | 0.008355982 | no |
| CECR4        | -0.108770974 | -2.888775688 | 0.003987451 | 0.008361158 | no |
| MTA2         | -0.10876452  | -2.888602236 | 0.003989624 | 0.008364848 | no |
| CREB3L4      | -0.108748751 | -2.888178434 | 0.003994939 | 0.008374754 | no |
| MAP2K2       | -0.108748044 | -2.88815943  | 0.003995178 | 0.008374754 | no |
| KLHL30       | 0.108744901  | 2.888074947  | 0.003996238 | 0.008376109 | no |
| EMCN         | 0.108710323  | 2.887145638  | 0.004007919 | 0.008399721 | no |
| ARPM1        | 0.108695873  | 2.886757268  | 0.00401281  | 0.008409099 | no |
| FLJ26850     | 0.108677157  | 2.88625427   | 0.004019152 | 0.008421517 | no |
| C1orf190     | 0.108667118  | 2.885984486  | 0.004022557 | 0.008427779 | no |
| CRAT         | -0.108663465 | -2.885886303 | 0.004023797 | 0.008429503 | no |
| TMEM218      | 0.108634507  | 2.885108057  | 0.004033639 | 0.008449244 | no |
| CXCR7        | 0.108623691  | 2.884817373  | 0.00403732  | 0.00845608  | no |
| TBX6         | -0.108614679 | -2.884575161 | 0.00404039  | 0.008461633 | no |
| TRIM63       | 0.108605026  | 2.884315733  | 0.00404368  | 0.008467647 | no |
| WNT10B       | -0.108582448 | -2.88370898  | 0.004051386 | 0.008482903 | no |
| ZNF559       | -0.108568605 | -2.88333695  | 0.004056117 | 0.00849193  | no |
| CXorf30      | 0.10853518   | 2.882438671  | 0.004067561 | 0.008515007 | no |
| DDX41        | -0.10850059  | -2.881509099 | 0.004079434 | 0.008538979 | no |
| WNK3         | -0.108497257 | -2.881419519 | 0.00408058  | 0.008540493 | no |
| CTNND1       | 0.108495432  | 2.881370469  | 0.004081208 | 0.008540923 | no |
| C9orf170     | 0.108418118  | 2.879292786  | 0.004107871 | 0.008595832 | no |
| LLGL2        | 0.108415674  | 2.879227104  | 0.004108716 | 0.008596711 | no |
| LOC100192379 | -0.108381834 | -2.878317705 | 0.004120439 | 0.008620346 | no |
| C21orf70     | -0.10837567  | -2.878152067 | 0.004122577 | 0.008623928 | no |
| PANX1        | 0.108368167  | 2.87795045   | 0.004125181 | 0.008628483 | no |
| PFDN6        | -0.10833049  | -2.876937972 | 0.004138282 | 0.008654989 | no |
| CAMKK1       | -0.108313195 | -2.8764732   | 0.004144308 | 0.008665873 | no |
| THUMPD3      | 0.108313094  | 2.876470509  | 0.004144343 | 0.008665873 | no |
| COIL         | -0.108310078 | -2.876389441 | 0.004145395 | 0.008667176 | no |
| PGBD5        | -0.108298217 | -2.876070726 | 0.004149533 | 0.008674931 | no |
| ACTR5        | -0.108295487 | -2.875997364 | 0.004150486 | 0.008676027 | no |
| COG3         | -0.108264403 | -2.875162067 | 0.004161352 | 0.00869784  | no |
| SERP1        | 0.108255739  | 2.874929247  | 0.004164385 | 0.00870328  | no |
| NOC2L        | -0.108250411 | -2.874786093 | 0.004166251 | 0.008705544 | no |
| AP4B1        | 0.108250187  | 2.874780069  | 0.004166329 | 0.008705544 | no |
| GNRH1        | 0.10821806   | 2.87391675   | 0.004177599 | 0.00872819  | no |
| MMP10        | 0.108204102  | 2.873541683  | 0.004182503 | 0.008737534 | no |
| ETNK2        | 0.108197552  | 2.873365693  | 0.004184807 | 0.008741442 | no |
| RSPH1        | 0.108195186  | 2.873302102  | 0.004185639 | 0.008742278 | no |
| PEX10        | -0.108191311 | -2.873197974 | 0.004187003 | 0.008744222 | no |
| TAS2R20      | -0.10818559  | -2.873044261 | 0.004189016 | 0.008747524 | no |
| AEBP2        | 0.108180953  | 2.872919653  | 0.004190649 | 0.008749578 | no |
| ANKRD30B     | -0.108180339 | -2.872903143 | 0.004190865 | 0.008749578 | no |
| OR4N3P       | -0.10817517  | -2.872764264 | 0.004192686 | 0.008752476 | no |
| TBCCD1       | 0.108145866  | 2.871976836  | 0.004203023 | 0.008773148 | no |
| KLHL24       | -0.108118022 | -2.871228633 | 0.004212866 | 0.008792787 | no |
| TCTEX1D2     | 0.10808528   | 2.870348842  | 0.004224467 | 0.00881609  | no |
| LOC730668    | 0.108084003  | 2.870314536  | 0.00422492  | 0.008816126 | no |

|           |              |              |             |             |    |
|-----------|--------------|--------------|-------------|-------------|----|
| SPTLC1    | 0.108053533  | 2.869495803  | 0.004235744 | 0.008837798 | no |
| ZBTB24    | -0.10801969  | -2.868586446 | 0.004247794 | 0.008862028 | no |
| NOP14     | 0.108015794  | 2.868481754  | 0.004249184 | 0.008864011 | no |
| HOXA10    | 0.108010612  | 2.868342536  | 0.004251032 | 0.008866952 | no |
| DONSON    | 0.107996741  | 2.867969833  | 0.004255984 | 0.008876364 | no |
| IFIT3     | 0.107977438  | 2.867451174  | 0.004262883 | 0.008889837 | no |
| ABCC11    | -0.10795797  | -2.866928067 | 0.004269852 | 0.008903451 | no |
| ELAC1     | 0.107915917  | 2.865798141  | 0.00428494  | 0.008933991 | no |
| LOC643719 | -0.107904004 | -2.865478057 | 0.004289223 | 0.008941999 | no |
| MORF4     | 0.107902086  | 2.865426523  | 0.004289913 | 0.008942515 | no |
| C4orf49   | 0.107892366  | 2.865165358  | 0.00429341  | 0.008948884 | no |
| NAA35     | -0.107881306 | -2.864868194 | 0.004297394 | 0.008956263 | no |
| RHPN2     | 0.107867528  | 2.86449801   | 0.00430236  | 0.00896569  | no |
| AKR1C3    | -0.107860218 | -2.864301616 | 0.004304998 | 0.008970261 | no |
| TMEM38B   | 0.107849588  | 2.864015988  | 0.004308835 | 0.008977333 | no |
| NARS      | -0.107846578 | -2.863935109 | 0.004309923 | 0.008978673 | no |
| RASGEF1B  | 0.10783662   | 2.863667578  | 0.004313521 | 0.008985243 | no |
| CISD1     | -0.107825376 | -2.863365461 | 0.004317588 | 0.008992788 | no |
| SRBD1     | 0.107815783  | 2.863107731  | 0.00432106  | 0.008999093 | no |
| BMP5      | 0.107794576  | 2.862537935  | 0.004328746 | 0.00901417  | no |
| C3orf37   | -0.107780402 | -2.862157104 | 0.004333889 | 0.009023952 | no |
| AS3MT     | -0.10777075  | -2.861897779 | 0.004337395 | 0.009030321 | no |
| C1orf53   | 0.107760176  | 2.861613681  | 0.004341238 | 0.009037392 | no |
| MCOLN3    | 0.107749661  | 2.861331179  | 0.004345063 | 0.009044424 | no |
| FABP7     | 0.107742302  | 2.86113346   | 0.004347742 | 0.009049068 | no |
| NKAIN3    | -0.107732583 | -2.860872351 | 0.004351282 | 0.009055504 | no |
| PGBD4     | -0.107723537 | -2.860629298 | 0.00435458  | 0.009060074 | no |
| SSU72     | 0.107722086  | 2.860590317  | 0.004355109 | 0.009060074 | no |
| ACSF3     | -0.107721912 | -2.860585649 | 0.004355172 | 0.009060074 | no |
| EFR3A     | 0.107721642  | 2.860578382  | 0.004355271 | 0.009060074 | no |
| SELL      | -0.107697644 | -2.859933638 | 0.00436403  | 0.009077363 | no |
| WDR85     | -0.107694587 | -2.859851495 | 0.004365147 | 0.009078752 | no |
| CYSLTR2   | 0.107666831  | 2.859105805  | 0.004375301 | 0.009098934 | no |
| ITPKA     | -0.10766384  | -2.859025427 | 0.004376397 | 0.009100276 | no |
| SCT       | -0.107659361 | -2.8589051   | 0.004378037 | 0.009102752 | no |
| RNASE13   | -0.107647827 | -2.858595227 | 0.004382265 | 0.009110606 | no |
| STYK1     | -0.107635796 | -2.858272005 | 0.004386679 | 0.009118845 | no |
| SNRNP70   | -0.10761822  | -2.8577998   | 0.004393135 | 0.009131326 | no |
| INTS8     | 0.107608766  | 2.857545803  | 0.004396612 | 0.009137612 | no |
| CNN1      | 0.107606809  | 2.85749323   | 0.004397331 | 0.009138169 | no |
| AMOT      | -0.107595706 | -2.857194943 | 0.004401418 | 0.00914572  | no |
| CXADR     | 0.107574379  | 2.856621962  | 0.004409276 | 0.009161109 | no |
| TRIM41    | -0.107572782 | -2.85657907  | 0.004409865 | 0.009161391 | no |
| TRIM47    | 0.107551023  | 2.855994491  | 0.004417897 | 0.009177134 | no |
| TKTL2     | -0.107523145 | -2.855245548 | 0.004428207 | 0.009197605 | no |
| CAPN10    | -0.107462667 | -2.85362079  | 0.004450648 | 0.009243266 | no |
| CCR10     | 0.107419537  | 2.852462129  | 0.004466714 | 0.00927568  | no |
| ZNF530    | 0.10734676   | 2.850507035  | 0.004493943 | 0.009331267 | no |
| EFNA1     | 0.107319718  | 2.849780579  | 0.004504099 | 0.009351394 | no |
| ESX1      | -0.107249132 | -2.84788443  | 0.004530706 | 0.009405669 | no |
| psiTPTE22 | -0.107240605 | -2.847655362 | 0.00453393  | 0.009411396 | no |



|              |              |              |             |             |    |
|--------------|--------------|--------------|-------------|-------------|----|
| LPL          | -0.107233926 | -2.847475935 | 0.004536457 | 0.009414761 | no |
| SLC25A29     | -0.107233857 | -2.84747409  | 0.004536483 | 0.009414761 | no |
| VTN          | -0.107231939 | -2.84742258  | 0.004537208 | 0.009415301 | no |
| ARHGAP1      | 0.107229653  | 2.847361167  | 0.004538073 | 0.00941613  | no |
| NANOS2       | -0.107227374 | -2.847299952 | 0.004538936 | 0.009416953 | no |
| AGAP8        | -0.107207649 | -2.84677009  | 0.004546409 | 0.009431489 | no |
| ABTB2        | -0.107205009 | -2.846699169 | 0.00454741  | 0.009432598 | no |
| FAM162B      | 0.107189587  | 2.846284887  | 0.004553262 | 0.009443767 | no |
| GCN1L1       | -0.107181631 | -2.846071161 | 0.004556283 | 0.009449065 | no |
| WFDC6        | 0.107156192  | 2.845387822  | 0.004565956 | 0.009468153 | no |
| VWA2         | -0.107100935 | -2.843903525 | 0.004587031 | 0.009510879 | no |
| FAM48A       | -0.107092467 | -2.843676058 | 0.004590268 | 0.009516616 | no |
| LOC100189589 | -0.107066623 | -2.84298186  | 0.004600161 | 0.009536149 | no |
| BMPR1B       | -0.107047841 | -2.842477345 | 0.004607363 | 0.0095501   | no |
| SFRS16       | -0.107027192 | -2.841922676 | 0.004615293 | 0.009564732 | no |
| WDFY2        | 0.107026995  | 2.84191739   | 0.004615369 | 0.009564732 | no |
| MFHAS1       | 0.107021854  | 2.841779294  | 0.004617345 | 0.009567847 | no |
| CCDC11       | 0.10701134   | 2.841496876  | 0.004621389 | 0.009575245 | no |
| KCNJ3        | -0.10700551  | -2.841340276 | 0.004623633 | 0.009578913 | no |
| UCN          | -0.106983081 | -2.840737835 | 0.004632274 | 0.009595831 | no |
| C11orf31     | 0.106977752  | 2.840594696  | 0.004634329 | 0.009599105 | no |
| RASAL1       | -0.10695358  | -2.839945429 | 0.004643662 | 0.009617451 | no |
| CEBPG        | 0.106943147  | 2.839665193  | 0.004647695 | 0.009624502 | no |
| C11orf46     | -0.106942312 | -2.839642746 | 0.004648019 | 0.009624502 | no |
| C19orf30     | -0.106940497 | -2.839593998 | 0.004648721 | 0.00962497  | no |
| KIAA0391     | 0.106939006  | 2.839553971  | 0.004649297 | 0.009625178 | no |
| LOC286002    | -0.106936834 | -2.839495614 | 0.004650138 | 0.009625933 | no |
| C6orf163     | -0.106920842 | -2.839066067 | 0.004656329 | 0.009637763 | no |
| CDK10        | -0.106912448 | -2.838840605 | 0.004659582 | 0.009643509 | no |
| MYO19        | 0.1068832    | 2.838055006  | 0.004670933 | 0.00966601  | no |
| ZFR          | -0.106876169 | -2.837866149 | 0.004673665 | 0.009670675 | no |
| FAM102B      | 0.10686702   | 2.837620414  | 0.004677223 | 0.009677046 | no |
| RPP40        | 0.106859985  | 2.837431454  | 0.00467996  | 0.009681718 | no |
| NCRNA00115   | -0.106814965 | -2.836222253 | 0.00469751  | 0.009717032 | no |
| LUZP4        | 0.106789694  | 2.835543505  | 0.004707388 | 0.009736468 | no |
| FLJ40504     | -0.106765123 | -2.834883566 | 0.00471701  | 0.009755371 | no |
| HELZ         | -0.106763627 | -2.834843374 | 0.004717597 | 0.009755586 | no |
| KCTD1        | -0.106694546 | -2.83298798  | 0.004744747 | 0.009810408 | no |
| FAM13A       | -0.106693707 | -2.832965448 | 0.004745078 | 0.009810408 | no |
| SLC16A1      | 0.106688332  | 2.832821092  | 0.004747196 | 0.009813784 | no |
| TMTC3        | 0.106682613  | 2.832667481  | 0.004749451 | 0.009817435 | no |
| ZBTB39       | -0.106681391 | -2.832634653 | 0.004749933 | 0.009817435 | no |
| NEFH         | -0.106675596 | -2.832479028 | 0.004752219 | 0.009821156 | no |
| GNG13        | -0.106651858 | -2.83184146  | 0.004761595 | 0.009839527 | no |
| PTPRN        | -0.106643969 | -2.831629578 | 0.004764715 | 0.009844967 | no |
| INHBC        | -0.106640465 | -2.831535486 | 0.004766101 | 0.009846824 | no |
| LOC84856     | -0.106630771 | -2.83127511  | 0.004769938 | 0.009853745 | no |
| ATXN7L3      | -0.106589963 | -2.830179122 | 0.00478612  | 0.009885391 | no |
| C2orf62      | 0.106589672  | 2.830171323  | 0.004786235 | 0.009885391 | no |
| RPS6KA6      | -0.106586367 | -2.830082557 | 0.004787548 | 0.009887093 | no |
| CCDC124      | -0.106553239 | -2.829192832 | 0.004800724 | 0.009913292 | no |

|           |              |              |             |             |    |
|-----------|--------------|--------------|-------------|-------------|----|
| PPIH      | 0.106537846  | 2.828779413  | 0.004806858 | 0.009924945 | no |
| C1orf64   | -0.106536326 | -2.828738605 | 0.004807464 | 0.009925182 | no |
| FAM40B    | -0.106530347 | -2.828578016 | 0.004809849 | 0.009929092 | no |
| AK5       | -0.106512802 | -2.828106822 | 0.004816853 | 0.009942126 | no |
| LOC391322 | -0.106512066 | -2.828087069 | 0.004817146 | 0.009942126 | no |
| GPR156    | 0.106502554  | 2.827831603  | 0.004820948 | 0.009948956 | no |
| C6orf108  | -0.106492602 | -2.827564337 | 0.004824927 | 0.009956121 | no |
| DTHD1     | 0.106491409  | 2.82753229   | 0.004825405 | 0.009956121 | no |
| EIF3H     | -0.106489737 | -2.827487393 | 0.004826074 | 0.009956485 | no |
| CHRNA2    | -0.106487047 | -2.827415151 | 0.00482715  | 0.00995769  | no |
| SERINC3   | 0.106476203  | 2.827123904  | 0.004831492 | 0.00996563  | no |
| GTF2IRD1  | -0.106445785 | -2.826307016 | 0.004843689 | 0.00998977  | no |
| SERPINA5  | 0.106443986  | 2.82625868   | 0.004844412 | 0.009990241 | no |
| ARNTL     | 0.106441827  | 2.826200707  | 0.004845279 | 0.009991009 | no |
| NUDT9     | 0.10643521   | 2.826023013  | 0.004847937 | 0.00999547  | no |
| FLJ42289  | -0.106432534 | -2.825951136 | 0.004849012 | 0.009996668 | no |
| C7orf34   | 0.106430613  | 2.825899538  | 0.004849784 | 0.00999724  | no |
| DSCC1     | 0.106414542  | 2.825467937  | 0.004856247 | 0.010009543 | no |
| NINJ2     | 0.106369261  | 2.824251905  | 0.004874499 | 0.010046138 | no |
| MRPL38    | -0.106328267 | -2.823151023 | 0.004891076 | 0.010079275 | no |
| KLHDC8A   | 0.106316165  | 2.822826011  | 0.00489598  | 0.010088353 | no |
| TAAR5     | -0.106310246 | -2.822667072 | 0.004898379 | 0.010092269 | no |
| HINT1     | 0.106306857  | 2.822576051  | 0.004899754 | 0.010094072 | no |
| C3orf50   | -0.106293422 | -2.822215253 | 0.004905207 | 0.010104276 | no |
| GAB1      | -0.106272756 | -2.82166029  | 0.004913605 | 0.010120544 | no |
| ATP5SL    | 0.106263788  | 2.821419458  | 0.004917253 | 0.010127027 | no |
| DYNC1I2   | -0.106254808 | -2.821178294 | 0.004920909 | 0.010133524 | no |
| MYCT1     | 0.106248064  | 2.820997191  | 0.004923656 | 0.010138148 | no |
| HOMER3    | 0.106231012  | 2.820539286  | 0.004930608 | 0.010151428 | no |
| VWA5A     | 0.10620688   | 2.819891231  | 0.004940462 | 0.01017068  | no |
| CACNG8    | -0.106203223 | -2.81979303  | 0.004941956 | 0.010172722 | no |
| TPI1      | 0.106197737  | 2.819645708  | 0.0049442   | 0.010176303 | no |
| SLC7A5P1  | -0.106142877 | -2.818172542 | 0.004966681 | 0.010221535 | no |
| SLC6A12   | -0.106115772 | -2.817444685 | 0.004977823 | 0.010243423 | no |
| ZNF187    | -0.106084088 | -2.81659388  | 0.004990876 | 0.010269237 | no |
| MRPL35    | -0.106060541 | -2.81596158  | 0.005000596 | 0.01028746  | no |
| PREPL     | -0.10606017  | -2.815951603 | 0.00500075  | 0.01028746  | no |
| SBF1P1    | -0.106019283 | -2.81485369  | 0.00501767  | 0.010321217 | no |
| CORO7     | -0.105985146 | -2.813937041 | 0.005031836 | 0.010349304 | no |
| PRKACB    | -0.105982621 | -2.813869257 | 0.005032885 | 0.010350408 | no |
| SPDYE6    | 0.105937247  | 2.812650875  | 0.005051773 | 0.010388197 | no |
| TMEM132E  | 0.105930426  | 2.81246772   | 0.005054618 | 0.010392991 | no |
| CHMP1A    | -0.105887927 | -2.811326581 | 0.005072377 | 0.010428444 | no |
| RANBP3L   | -0.105881687 | -2.81115902  | 0.005074989 | 0.010432754 | no |
| HCFC2     | -0.105796195 | -2.808863504 | 0.0051109   | 0.010505509 | no |
| PIK3IP1   | 0.10579006   | 2.808698774  | 0.005113486 | 0.010509756 | no |
| RAB15     | -0.105778175 | -2.808379661 | 0.005118499 | 0.010518989 | no |
| SPATA5L1  | -0.105773388 | -2.808251135 | 0.005120519 | 0.010522071 | no |
| KCNH2     | -0.105767519 | -2.80809356  | 0.005122997 | 0.010526093 | no |
| EGFL8     | -0.105762459 | -2.807957678 | 0.005125134 | 0.010529414 | no |
| GDF2      | -0.105759096 | -2.807867377 | 0.005126555 | 0.01053063  | no |

|          |              |              |             |             |    |
|----------|--------------|--------------|-------------|-------------|----|
| C2orf63  | -0.105758593 | -2.807853878 | 0.005126768 | 0.01053063  | no |
| TST      | -0.105745788 | -2.807510068 | 0.005132181 | 0.010540679 | no |
| ISCU     | 0.10574251   | 2.807422065  | 0.005133568 | 0.010542455 | no |
| SLC5A10  | 0.105718425  | 2.806775373  | 0.005143767 | 0.010562328 | no |
| CCNA2    | 0.105712932  | 2.806627891  | 0.005146095 | 0.010566036 | no |
| PRPF3    | -0.105709312 | -2.806530691 | 0.005147631 | 0.010568115 | no |
| TBC1D3H  | -0.105675197 | -2.805614738 | 0.005162118 | 0.010596781 | no |
| LRRC41   | 0.105651712  | 2.80498419   | 0.005172112 | 0.010616219 | no |
| CDH13    | -0.105649713 | -2.804930506 | 0.005172964 | 0.01061689  | no |
| LSM1     | 0.105628114  | 2.804350595  | 0.005182172 | 0.01063347  | no |
| GNG3     | -0.105627593 | -2.804336611 | 0.005182394 | 0.01063347  | no |
| CARD14   | -0.105627064 | -2.804322419 | 0.00518262  | 0.01063347  | no |
| NPR2     | 0.10561338   | 2.803955015  | 0.005188462 | 0.010644377 | no |
| LIPE     | -0.10561178  | -2.803912057 | 0.005189146 | 0.010644699 | no |
| KIAA1704 | -0.105591834 | -2.803376525 | 0.005197673 | 0.01066111  | no |
| ERCC1    | 0.105588125  | 2.803276939  | 0.00519926  | 0.010663283 | no |
| ANKRD56  | -0.105585039 | -2.803194093 | 0.005200581 | 0.01066491  | no |
| TMEM133  | -0.105579708 | -2.803050964 | 0.005202863 | 0.010668508 | no |
| PI4KAP2  | -0.105573542 | -2.802885424 | 0.005205504 | 0.010672553 | no |
| SNX31    | -0.105572638 | -2.802861161 | 0.005205892 | 0.010672553 | no |
| TRUB2    | -0.105567803 | -2.802731343 | 0.005207964 | 0.010675718 | no |
| RAB25    | -0.105554576 | -2.802376213 | 0.005213635 | 0.010686261 | no |
| C3orf45  | -0.105529945 | -2.801714905 | 0.005224213 | 0.010706855 | no |
| XPNPEP3  | 0.105500017  | 2.800911418  | 0.00523709  | 0.010732159 | no |
| DUSP27   | 0.105493003  | 2.800723105  | 0.005240112 | 0.010737264 | no |
| CNGA3    | 0.105489567  | 2.800630862  | 0.005241593 | 0.01073921  | no |
| SGK196   | -0.105478514 | -2.8003341   | 0.00524636  | 0.010747888 | no |
| SLC22A23 | 0.105465622  | 2.799988     | 0.005251925 | 0.010758198 | no |
| SLC7A5   | -0.105442952 | -2.799379366 | 0.005261723 | 0.010777177 | no |
| DDX46    | -0.105435319 | -2.79917444  | 0.005265026 | 0.01078285  | no |
| PDK1     | 0.105414285  | 2.798609726  | 0.005274137 | 0.010800416 | no |
| CYP4X1   | -0.105396728 | -2.798138387 | 0.005281753 | 0.010814917 | no |
| NPEPL1   | 0.105389076  | 2.797932946  | 0.005285076 | 0.010820624 | no |
| DAB1     | -0.105337031 | -2.796535732 | 0.005307723 | 0.010865892 | no |
| CCDC66   | -0.105320207 | -2.796084066 | 0.005315063 | 0.010879816 | no |
| FUNDC1   | 0.105301129  | 2.795571896  | 0.005323397 | 0.010895772 | no |
| HIVEP2   | -0.10529776  | -2.795481458 | 0.00532487  | 0.010897684 | no |
| CCDC19   | 0.10527158   | 2.794778613  | 0.005336329 | 0.01092003  | no |
| PLAT     | 0.105263109  | 2.794551218  | 0.005340041 | 0.01092652  | no |
| ARID2    | -0.105255461 | -2.794345896 | 0.005343395 | 0.010932276 | no |
| NEIL1    | -0.105233807 | -2.793764579 | 0.0053529   | 0.010950616 | no |
| DTNB     | -0.10523112  | -2.793692447 | 0.005354081 | 0.010951923 | no |
| NLK      | -0.105226875 | -2.793578492 | 0.005355947 | 0.010954614 | no |
| C2orf52  | -0.105225662 | -2.793545919 | 0.00535648  | 0.010954614 | no |
| FAM106A  | -0.105218106 | -2.793343091 | 0.005359802 | 0.0109603   | no |
| NEIL3    | 0.105200806  | 2.792878668  | 0.005367417 | 0.01097476  | no |
| ZNF828   | -0.105196081 | -2.792751808 | 0.005369498 | 0.010977906 | no |
| HSPA9    | -0.105181162 | -2.792351321 | 0.005376074 | 0.010990239 | no |
| SAMD11   | -0.105176246 | -2.792219355 | 0.005378243 | 0.010993561 | no |
| KCMF1    | 0.105157616  | 2.791719228  | 0.005386468 | 0.011009262 | no |
| IPCEF1   | -0.105140763 | -2.791266807 | 0.005393919 | 0.011023375 | no |

|          |              |              |             |             |    |
|----------|--------------|--------------|-------------|-------------|----|
| TMC07    | -0.105107682 | -2.79037877  | 0.005408571 | 0.011052202 | no |
| TBCA     | 0.105094147  | 2.790015433  | 0.005414576 | 0.011063354 | no |
| CHM      | 0.105068664  | 2.789331353  | 0.005425898 | 0.011085369 | no |
| EBAG9    | 0.105011002  | 2.787783497  | 0.005451597 | 0.011136747 | no |
| OR1J2    | 0.105004106  | 2.787598366  | 0.005454678 | 0.011141915 | no |
| TNKS2    | -0.104997542 | -2.787422168 | 0.005457612 | 0.011146782 | no |
| PLA2G2F  | 0.104991175  | 2.787251276  | 0.005460458 | 0.01115147  | no |
| ERLEC1   | 0.104989481  | 2.787205807  | 0.005461216 | 0.01115189  | no |
| CBR3     | 0.104979132  | 2.786927991  | 0.005465848 | 0.011160221 | no |
| SLAMF9   | 0.104972766  | 2.786757119  | 0.005468698 | 0.011164913 | no |
| IRF2BP1  | -0.104935258 | -2.785750274 | 0.005485521 | 0.011198128 | no |
| PNKD     | 0.104932096  | 2.785665403  | 0.005486941 | 0.011199897 | no |
| ZFP3     | -0.104927266 | -2.78553575  | 0.005489111 | 0.011203195 | no |
| PABPN1L  | -0.104924436 | -2.78545979  | 0.005490383 | 0.01120466  | no |
| VSIG8    | 0.104911163  | 2.78510349   | 0.005496352 | 0.01121571  | no |
| PSMD1    | 0.104906304  | 2.784973062  | 0.005498539 | 0.011219039 | no |
| FLJ14107 | 0.104873882  | 2.784102788  | 0.005513149 | 0.011247714 | no |
| RPS12    | -0.104867551 | -2.78393285  | 0.005516006 | 0.011252407 | no |
| NCALD    | -0.104862509 | -2.783797519 | 0.005518282 | 0.011255915 | no |
| TMEM53   | 0.104851802  | 2.783510104  | 0.005523119 | 0.011264644 | no |
| USE1     | -0.104847123 | -2.783384504 | 0.005525234 | 0.011267821 | no |
| C18orf34 | -0.104808589 | -2.78235019  | 0.005542678 | 0.011302255 | no |
| WASH5P   | -0.104768061 | -2.781262344 | 0.005561078 | 0.011338633 | no |
| TTC30A   | 0.104766149  | 2.781211028  | 0.005561948 | 0.011339262 | no |
| FBX040   | -0.10474625  | -2.780676922 | 0.005571004 | 0.011356579 | no |
| DNASE2B  | 0.104730579  | 2.780256281  | 0.005578145 | 0.01136999  | no |
| HAR1B    | -0.104711494 | -2.779744013 | 0.005586853 | 0.011386592 | no |
| EPHB3    | -0.104698439 | -2.77939361  | 0.005592817 | 0.011397598 | no |
| C7orf31  | 0.104686338  | 2.779068812  | 0.00559835  | 0.011406814 | no |
| RAVER1   | -0.10468608  | -2.779061894 | 0.005598467 | 0.011406814 | no |
| CYTH2    | -0.104681778 | -2.778946419 | 0.005600436 | 0.011409675 | no |
| GOLGA8F  | 0.104676696  | 2.778810017  | 0.005602762 | 0.011413263 | no |
| PRSS1    | 0.104673532  | 2.778725099  | 0.00560421  | 0.011415063 | no |
| RGPD4    | -0.104663051 | -2.778443774 | 0.005609011 | 0.011423691 | no |
| PLAC8L1  | -0.104629896 | -2.777553863 | 0.005624222 | 0.011453518 | no |
| ANKRD43  | -0.104624013 | -2.777395973 | 0.005626925 | 0.011457868 | no |
| TTC25    | 0.104607011  | 2.776939649  | 0.005634743 | 0.011472631 | no |
| LOC26102 | -0.104603169 | -2.776836525 | 0.005636511 | 0.011475076 | no |
| STAM2    | 0.104589914  | 2.776480745  | 0.005642615 | 0.011486345 | no |
| ADRB1    | -0.104579064 | -2.776189546 | 0.005647615 | 0.011494939 | no |
| ELOVL3   | 0.104578287  | 2.776168674  | 0.005647973 | 0.011494939 | no |
| RRAD     | 0.104571477  | 2.775985897  | 0.005651114 | 0.011500174 | no |
| RARRES1  | 0.10456567   | 2.775830049  | 0.005653793 | 0.011504468 | no |
| KBTBD12  | 0.104556513  | 2.77558427   | 0.005658021 | 0.011511912 | no |
| ANKRD34C | -0.104535667 | -2.775024776 | 0.005667656 | 0.011529635 | no |
| CNTN6    | -0.104535199 | -2.775012207 | 0.005667872 | 0.011529635 | no |
| TM2D1    | 0.104529031  | 2.774846681  | 0.005670726 | 0.011533281 | no |
| FKBP9L   | 0.104528858  | 2.77484204   | 0.005670806 | 0.011533281 | no |
| ALMS1    | -0.104526346 | -2.774774617 | 0.005671968 | 0.011534485 | no |
| RNF182   | -0.104501188 | -2.774099395 | 0.005683623 | 0.011557025 | no |
| SLC27A6  | 0.10448811   | 2.773748388  | 0.005689691 | 0.011568198 | no |

|           |              |              |             |             |    |
|-----------|--------------|--------------|-------------|-------------|----|
| ZNF492    | -0.104485318 | -2.773673445 | 0.005690987 | 0.01156967  | no |
| SKA1      | 0.104481589  | 2.773573373  | 0.005692718 | 0.011572026 | no |
| FAM109A   | -0.104476665 | -2.773441217 | 0.005695005 | 0.011575511 | no |
| RSPH10B2  | 0.104466291  | 2.773162774  | 0.005699826 | 0.011584146 | no |
| PRCD      | -0.104448326 | -2.772680612 | 0.005708184 | 0.011599214 | no |
| CNOT7     | 0.104447888  | 2.772668857  | 0.005708388 | 0.011599214 | no |
| ZNF595    | -0.104434859 | -2.772319182 | 0.005714456 | 0.011610377 | no |
| KIAA0895  | 0.104432971  | 2.772268505  | 0.005715336 | 0.011610998 | no |
| KLF4      | 0.104403505  | 2.771477687  | 0.005729083 | 0.011637757 | no |
| NGB       | -0.104383483 | -2.770940345 | 0.00573844  | 0.011655594 | no |
| RCBTB2    | 0.104365912  | 2.770468753  | 0.005746664 | 0.011671126 | no |
| LOC286367 | 0.104357195  | 2.770234806  | 0.005750748 | 0.011678247 | no |
| PRR12     | -0.104354329 | -2.770157891 | 0.005752091 | 0.011679802 | no |
| MRPL20    | 0.104316223  | 2.769135225  | 0.005769978 | 0.011714943 | no |
| KIAA1609  | 0.104305645  | 2.768851341  | 0.005774952 | 0.011723865 | no |
| GTDC1     | -0.104294745 | -2.768558794 | 0.005780081 | 0.011733101 | no |
| KCNV1     | -0.104288778 | -2.768398666 | 0.005782891 | 0.011736479 | no |
| RPS6KB2   | 0.104288745  | 2.768397763  | 0.005782907 | 0.011736479 | no |
| CDC40     | -0.104274944 | -2.768027384 | 0.00578941  | 0.011748499 | no |
| NHS       | 0.104269655  | 2.767885452  | 0.005791904 | 0.01175238  | no |
| RASD2     | -0.104233027 | -2.766902472 | 0.005809203 | 0.011786298 | no |
| YME1L1    | 0.104218036  | 2.766500149  | 0.005816296 | 0.011799506 | no |
| CITED4    | 0.104210128  | 2.766287939  | 0.005820041 | 0.011805918 | no |
| SPOCK2    | -0.104184632 | -2.765603703 | 0.00583213  | 0.011828447 | no |
| DDRGK1    | 0.104184238  | 2.765593122  | 0.005832317 | 0.011828447 | no |
| PCDH1     | -0.104181385 | -2.765516573 | 0.005833671 | 0.011830006 | no |
| CLSTN3    | -0.104177635 | -2.765415935 | 0.005835451 | 0.01183243  | no |
| NNT       | -0.10416217  | -2.765000904 | 0.005842799 | 0.011845955 | no |
| TMRSS6    | 0.10416113   | 2.764972981  | 0.005843294 | 0.011845955 | no |
| SYNPR     | -0.104145067 | -2.76454192  | 0.005850935 | 0.011860256 | no |
| ROCK1     | 0.104134283  | 2.764252532  | 0.005856069 | 0.011869475 | no |
| IDS       | -0.104129841 | -2.764133301 | 0.005858186 | 0.011872575 | no |
| SAV1      | 0.104113797  | 2.76370276   | 0.005865835 | 0.011886885 | no |
| LRP2BP    | -0.104099221 | -2.763311604 | 0.005872792 | 0.011899791 | no |
| TLK1      | 0.104095185  | 2.763203278  | 0.005874721 | 0.011902505 | no |
| REM2      | -0.10409038  | -2.763074345 | 0.005877016 | 0.011905963 | no |
| FAM10A4   | -0.104035785 | -2.761609263 | 0.005903158 | 0.011957725 | no |
| CPNE7     | -0.104025817 | -2.761341762 | 0.005907942 | 0.011966217 | no |
| RAB23     | 0.104022654  | 2.761256877  | 0.005909461 | 0.011968095 | no |
| DBF4B     | -0.104016625 | -2.761095101 | 0.005912357 | 0.01197276  | no |
| PDCL      | -0.104000899 | -2.760673081 | 0.005919918 | 0.01198687  | no |
| SUGT1P1   | -0.10399073  | -2.760400209 | 0.005924811 | 0.011995576 | no |
| RIMBP2    | -0.10398924  | -2.760360233 | 0.005925528 | 0.011995827 | no |
| FBX010    | -0.103987222 | -2.760306065 | 0.0059265   | 0.011996593 | no |
| MCHR2     | -0.103980853 | -2.760135166 | 0.005929567 | 0.0120016   | no |
| CNNM4     | 0.103975065  | 2.759979846  | 0.005932356 | 0.012006043 | no |
| CDCA4     | 0.103969303  | 2.75982521   | 0.005935133 | 0.012010462 | no |
| CPOX      | 0.103927169  | 2.758694566  | 0.005955478 | 0.012049915 | no |
| TULP1     | 0.103926459  | 2.758675532  | 0.005955821 | 0.012049915 | no |
| HOXA7     | 0.103922487  | 2.758568923  | 0.005957743 | 0.012052597 | no |
| GRM4      | -0.103916886 | -2.758418638 | 0.005960453 | 0.012056873 | no |

|           |              |              |             |             |    |
|-----------|--------------|--------------|-------------|-------------|----|
| ALG9      | -0.10388948  | -2.757683206 | 0.005973731 | 0.012082521 | no |
| LIPT2     | 0.103882335  | 2.757491489  | 0.005977196 | 0.012088322 | no |
| ABLIM3    | -0.103859825 | -2.756887462 | 0.005988127 | 0.012109217 | no |
| CARHSP1   | 0.103852814  | 2.756699328  | 0.005991535 | 0.012114897 | no |
| C3orf10   | 0.103820358  | 2.755828406  | 0.006007336 | 0.012145631 | no |
| CTS0      | 0.103809621  | 2.755540305  | 0.006012571 | 0.012155    | no |
| KCNA1     | -0.10380011  | -2.755285103 | 0.006017211 | 0.012162988 | no |
| INSR      | -0.103799057 | -2.755256844 | 0.006017725 | 0.012162988 | no |
| RBM38     | 0.103750791  | 2.753961721  | 0.006041328 | 0.012209474 | no |
| CTXN2     | -0.10373451  | -2.753524856 | 0.006049309 | 0.01222438  | no |
| CCDC114   | 0.103727564  | 2.753338462  | 0.006052716 | 0.012230044 | no |
| VPS39     | -0.103702405 | -2.752663383 | 0.006065073 | 0.012253788 | no |
| LRRC50    | 0.103694876  | 2.752461383  | 0.006068775 | 0.012260042 | no |
| RPL13AP20 | -0.103686951 | -2.752248734 | 0.006072675 | 0.012266693 | no |
| CCK       | -0.103684445 | -2.752181485 | 0.006073908 | 0.01226796  | no |
| RPSA      | -0.103676935 | -2.751979971 | 0.006077606 | 0.012274202 | no |
| FAM18B2   | 0.103669177  | 2.751771801  | 0.006081428 | 0.012280695 | no |
| EEF1B2    | -0.103663574 | -2.75162147  | 0.00608419  | 0.012285044 | no |
| GABRR3    | 0.103638722  | 2.750954651  | 0.006096453 | 0.012308576 | no |
| NOXA1     | -0.103613123 | -2.75026778  | 0.006109108 | 0.012332895 | no |
| TMEM177   | -0.103611736 | -2.750230568 | 0.006109794 | 0.012333048 | no |
| SERPINI1  | -0.103604525 | -2.750037072 | 0.006113364 | 0.012339022 | no |
| WDR47     | -0.103600946 | -2.749941039 | 0.006115136 | 0.012340787 | no |
| LOC554202 | 0.103600294  | 2.749923549  | 0.006115459 | 0.012340787 | no |
| TDRD5     | -0.103596365 | -2.749818137 | 0.006117405 | 0.012343482 | no |
| C8orf86   | -0.10358675  | -2.749560144 | 0.00612217  | 0.01235091  | no |
| RHEBL1    | 0.103586472  | 2.74955268   | 0.006122308 | 0.01235091  | no |
| MTX3      | -0.103557136 | -2.748765569 | 0.006136867 | 0.012379046 | no |
| C9orf44   | 0.10353691   | 2.748222865  | 0.006146924 | 0.012398095 | no |
| MIXL1     | 0.103501247  | 2.747266     | 0.006164691 | 0.012432692 | no |
| CCDC12    | -0.103499726 | -2.747225204 | 0.00616545  | 0.012432981 | no |
| CYB561D1  | 0.103494822  | 2.747093621  | 0.006167897 | 0.012436676 | no |
| TNF       | 0.103487614  | 2.746900213  | 0.006171496 | 0.01244203  | no |
| SLC37A4   | 0.103485873  | 2.746853517  | 0.006172365 | 0.01244203  | no |
| GLRA1     | -0.103485805 | -2.746851693 | 0.006172399 | 0.01244203  | no |
| PLEKHJ1   | -0.103460031 | -2.746160168 | 0.006185283 | 0.012466758 | no |
| TMEM87A   | -0.103433396 | -2.74544553  | 0.006198623 | 0.0124924   | no |
| PROX1     | -0.103431431 | -2.745392821 | 0.006199608 | 0.01249314  | no |
| CCDC45    | -0.103418957 | -2.745058137 | 0.006205865 | 0.012504503 | no |
| ZNRF3     | -0.1034177   | -2.745024401 | 0.006206496 | 0.012504528 | no |
| CDC48     | 0.103412146  | 2.744875389  | 0.006209284 | 0.012508899 | no |
| SMNDC1    | 0.103405771  | 2.744704348  | 0.006212486 | 0.012514102 | no |
| CIDEA     | -0.103403775 | -2.744650807 | 0.006213488 | 0.012514874 | no |
| MED31     | 0.103396401  | 2.744452958  | 0.006217194 | 0.012521091 | no |
| MOSC2     | 0.103394334  | 2.744397499  | 0.006218233 | 0.012521937 | no |
| LOC154822 | -0.103390172 | -2.744285833 | 0.006220326 | 0.012524903 | no |
| CEP170L   | -0.103381032 | -2.744040601 | 0.006224924 | 0.012532914 | no |
| SPHK2     | -0.103379576 | -2.744001542 | 0.006225657 | 0.012533141 | no |
| PTP4A3    | 0.103376809  | 2.743927297  | 0.00622705  | 0.012534697 | no |
| RABEP2    | 0.103367659  | 2.743681819  | 0.006231657 | 0.012542722 | no |
| C2orf43   | 0.10335827   | 2.743429908  | 0.006236388 | 0.012550995 | no |

|           |              |              |             |             |    |
|-----------|--------------|--------------|-------------|-------------|----|
| C17orf63  | -0.103330426 | -2.742682868 | 0.006250438 | 0.012578019 | no |
| RPS15AP10 | 0.103313793  | 2.742236618  | 0.006258844 | 0.012593681 | no |
| DUSP7     | -0.10328728  | -2.741525294 | 0.006272265 | 0.012619429 | no |
| XRCC4     | 0.103272593  | 2.741131279  | 0.00627971  | 0.012633151 | no |
| CDK14     | -0.103240346 | -2.740266132 | 0.006296085 | 0.012664834 | no |
| C4BPA     | 0.103238754  | 2.740223408  | 0.006296894 | 0.012665202 | no |
| KLHL3     | -0.103224277 | -2.739835021 | 0.006304259 | 0.012678754 | no |
| CCDC6     | -0.103202554 | -2.739252218 | 0.006315325 | 0.012699745 | no |
| NUP85     | 0.103191127  | 2.738945671  | 0.006321152 | 0.0127102   | no |
| IL19      | 0.103183419  | 2.738738871  | 0.006325086 | 0.012716845 | no |
| ZIC5      | 0.103169746  | 2.738372057  | 0.00633207  | 0.01272962  | no |
| STOML3    | 0.103159986  | 2.738110221  | 0.006337059 | 0.012738246 | no |
| ARSB      | 0.103158888  | 2.738080744  | 0.006337621 | 0.012738246 | no |
| ZBTB22    | -0.103154512 | -2.737963365 | 0.006339859 | 0.012741477 | no |
| ITCH      | 0.103152759  | 2.737916314  | 0.006340756 | 0.012742014 | no |
| LRRCC1    | 0.103135747  | 2.73745994   | 0.006349465 | 0.012758247 | no |
| SDF2      | 0.10311784   | 2.736979544  | 0.006358644 | 0.012775421 | no |
| RPL13AP3  | -0.103094929 | -2.736364889 | 0.006370406 | 0.01279778  | no |
| C16orf86  | -0.103066433 | -2.735600412 | 0.006385062 | 0.012825949 | no |
| CXorf41   | 0.103043013  | 2.734972122  | 0.00639713  | 0.012848914 | no |
| SLC26A8   | -0.103024092 | -2.734464534 | 0.006406894 | 0.012867248 | no |
| INPP5F    | -0.10301856  | -2.734316124 | 0.006409752 | 0.012871709 | no |
| LOC121952 | -0.103012042 | -2.734141293 | 0.006413119 | 0.012877192 | no |
| CTCFL     | -0.103007367 | -2.734015877 | 0.006415536 | 0.012880766 | no |
| ZSWIM1    | -0.103001665 | -2.733862906 | 0.006418485 | 0.012885407 | no |
| AURKAPS1  | 0.102998246  | 2.733771182  | 0.006420254 | 0.012887678 | no |
| RPL12     | -0.102995308 | -2.733692372 | 0.006421774 | 0.01288945  | no |
| VIP       | -0.102988898 | -2.733520401 | 0.006425092 | 0.01289483  | no |
| BECN1     | 0.102954255  | 2.732591066  | 0.006443051 | 0.012929589 | no |
| MLLT1     | -0.102951175 | -2.732508432 | 0.00644465  | 0.012931514 | no |
| 7-Sep     | 0.102947962  | 2.732422237  | 0.006446318 | 0.012932737 | no |
| CASP8AP2  | -0.102947537 | -2.732410844 | 0.006446539 | 0.012932737 | no |
| CENPA     | 0.102941298  | 2.732243488  | 0.006449779 | 0.012937954 | no |
| ATP6V1C1  | -0.102933133 | -2.732024449 | 0.006454022 | 0.012945181 | no |
| UQCRQ     | 0.102911627  | 2.731447539  | 0.006465211 | 0.012966336 | no |
| PIN1      | -0.102909992 | -2.731403672 | 0.006466062 | 0.012966757 | no |
| C1QL2     | -0.102905463 | -2.731282165 | 0.006468421 | 0.012970201 | no |
| GTF2H3    | 0.102887502  | 2.730800367  | 0.006477782 | 0.012987683 | no |
| CENPE     | 0.102879538  | 2.730586714  | 0.006481937 | 0.012994726 | no |
| DNTTIP1   | 0.102864426  | 2.730181332  | 0.006489828 | 0.01300873  | no |
| FAM54A    | 0.102863695  | 2.730161724  | 0.00649021  | 0.01300873  | no |
| EXOC3L    | 0.102861743  | 2.730109357  | 0.00649123  | 0.013009485 | no |
| RAP1GAP2  | -0.102846381 | -2.729697267 | 0.006499261 | 0.01302429  | no |
| BAZ2A     | -0.102842138 | -2.729583438 | 0.006501481 | 0.013027448 | no |
| RARS2     | 0.102833041  | 2.729339421  | 0.006506243 | 0.013035696 | no |
| CNTN4     | -0.10281525  | -2.728862172 | 0.006515564 | 0.013053079 | no |
| ZNF14     | -0.102806604 | -2.728630245 | 0.006520099 | 0.013060869 | no |
| WASL      | -0.102786852 | -2.728100402 | 0.006530468 | 0.013080345 | no |
| PCP4L1    | -0.102783618 | -2.72801365  | 0.006532167 | 0.013082452 | no |
| TSC22D4   | -0.102777862 | -2.727859256 | 0.006535192 | 0.013087215 | no |
| CDK15     | 0.102768104  | 2.727597498  | 0.006540324 | 0.013096194 | no |

|           |              |              |             |             |    |
|-----------|--------------|--------------|-------------|-------------|----|
| SNX19     | -0.102680745 | -2.725254151 | 0.006586426 | 0.013187202 | no |
| F8A1      | 0.102679409  | 2.725218314  | 0.006587134 | 0.013187312 | no |
| NDST1     | -0.102677422 | -2.725165036 | 0.006588185 | 0.013188112 | no |
| OXCT2     | -0.102610885 | -2.723380264 | 0.006623503 | 0.013257498 | no |
| DOM3Z     | -0.102576235 | -2.722450854 | 0.006641962 | 0.013293129 | no |
| PRKCB     | -0.102571531 | -2.722324674 | 0.006644472 | 0.013296836 | no |
| MT2A      | 0.10255177   | 2.721794633  | 0.006655023 | 0.013316633 | no |
| GRK7      | 0.102543182  | 2.72156427   | 0.006659614 | 0.0133245   | no |
| WSCD1     | -0.102534755 | -2.72133824  | 0.006664121 | 0.0133321   | no |
| PDSS1     | -0.102533309 | -2.721299443 | 0.006664895 | 0.0133321   | no |
| MAGOHB    | 0.102532382  | 2.721274584  | 0.00666539  | 0.0133321   | no |
| B3GNT4    | -0.102496388 | -2.720309124 | 0.006684676 | 0.013369351 | no |
| PSMG2     | 0.102482047  | 2.719924484  | 0.006692373 | 0.013383422 | no |
| TRPV6     | -0.102478773 | -2.71983667  | 0.006694131 | 0.013385614 | no |
| XP04      | -0.102473292 | -2.719689651 | 0.006697076 | 0.013390179 | no |
| NEFL      | -0.102463966 | -2.719439496 | 0.00670209  | 0.013398877 | no |
| ZNF485    | -0.102459927 | -2.71933118  | 0.006704261 | 0.013401894 | no |
| IL1F9     | 0.102450723  | 2.719084301  | 0.006709214 | 0.013410468 | no |
| C10orf131 | -0.102427429 | -2.718459505 | 0.006721762 | 0.013434222 | no |
| C3orf49   | -0.102422763 | -2.718334373 | 0.006724278 | 0.013437922 | no |
| PAX5      | 0.102407706  | 2.717930514  | 0.006732403 | 0.01345283  | no |
| DPP3      | 0.102394067  | 2.71756468   | 0.006739771 | 0.013466221 | no |
| CADPS     | -0.102389305 | -2.717436957 | 0.006742345 | 0.013470033 | no |
| FAF2      | 0.102385524  | 2.717335557  | 0.006744389 | 0.013472785 | no |
| KIAA1524  | 0.102376269  | 2.717087313  | 0.006749396 | 0.013481455 | no |
| OR4M2     | -0.102357937 | -2.716595643 | 0.006759322 | 0.013499948 | no |
| ZNF480    | 0.102331584  | 2.715888834  | 0.006773615 | 0.013527158 | no |
| SYDE2     | -0.102322702 | -2.715650593 | 0.006778439 | 0.013535454 | no |
| C1orf77   | -0.102320272 | -2.715585428 | 0.006779759 | 0.013536753 | no |
| EPB49     | -0.10231449  | -2.715430359 | 0.0067829   | 0.013541689 | no |
| NCDN      | -0.10230562  | -2.715192446 | 0.006787723 | 0.01354998  | no |
| KRT81     | 0.102296466  | 2.714946931  | 0.006792704 | 0.013558583 | no |
| RPL18A    | -0.102282029 | -2.714559708 | 0.006800565 | 0.013572935 | no |
| PEX2      | 0.102231561  | 2.71320614   | 0.006828111 | 0.013626566 | no |
| CLCN4     | -0.102204939 | -2.712492142 | 0.006842681 | 0.013654296 | no |
| HOXB3     | 0.102187818  | 2.712032969  | 0.006852066 | 0.013671674 | no |
| C7orf28B  | 0.102178003  | 2.71176973   | 0.006857452 | 0.01368107  | no |
| SLC7A4    | -0.102166653 | -2.71146534  | 0.006863684 | 0.013692152 | no |
| ZBBX      | 0.102149381  | 2.711002092  | 0.006873179 | 0.01370974  | no |
| AACS      | -0.102059849 | -2.708600936 | 0.006922582 | 0.013806921 | no |
| RNF123    | -0.102028501 | -2.707760228 | 0.006939954 | 0.013840205 | no |
| C22orf13  | 0.102026093  | 2.707695642  | 0.006941291 | 0.013841504 | no |
| ZNF81     | -0.102023171 | -2.707617301 | 0.006942912 | 0.013843372 | no |
| C2orf64   | -0.102002873 | -2.70707292  | 0.006954186 | 0.01386403  | no |
| NAF1      | 0.102002049  | 2.707050837  | 0.006954644 | 0.01386403  | no |
| SLC6A16   | 0.102000709  | 2.707014908  | 0.006955389 | 0.013864148 | no |
| ARL2BP    | 0.101993699  | 2.706826902  | 0.006959287 | 0.01387055  | no |
| CLUU10S   | 0.101982019  | 2.706513671  | 0.006965786 | 0.013882135 | no |
| NEUROD6   | -0.10196478  | -2.706051356 | 0.006975388 | 0.013899901 | no |
| COMMD5    | 0.101951581  | 2.705697376  | 0.006982748 | 0.013913196 | no |
| ATP5E     | 0.101926206  | 2.705016893  | 0.006996917 | 0.013940054 | no |



|           |              |              |             |             |    |
|-----------|--------------|--------------|-------------|-------------|----|
| FAM81B    | 0.101916061  | 2.704744818  | 0.007002589 | 0.01394998  | no |
| TFAM      | -0.101911126 | -2.704612474 | 0.00700535  | 0.013954104 | no |
| C2orf84   | -0.101905311 | -2.704456523 | 0.007008604 | 0.013959211 | no |
| DPP7      | 0.101901209  | 2.704346523  | 0.0070109   | 0.013962409 | no |
| CDK5RAP3  | -0.101883994 | -2.703884868 | 0.007020545 | 0.013980239 | no |
| ADAR      | 0.101874086  | 2.703619157  | 0.007026101 | 0.013989926 | no |
| DOCK1     | -0.101862818 | -2.703316977 | 0.007032425 | 0.014001139 | no |
| C12orf4   | 0.101853269  | 2.703060916  | 0.007037787 | 0.014010436 | no |
| CENPK     | 0.101848163  | 2.702923984  | 0.007040657 | 0.014014768 | no |
| INTS5     | -0.101845642 | -2.702856386 | 0.007042073 | 0.014016208 | no |
| NEUROD4   | -0.101837932 | -2.702649625 | 0.007046409 | 0.014023456 | no |
| DHODH     | -0.101803224 | -2.701718876 | 0.007065954 | 0.01406097  | no |
| CBWD1     | 0.101800027  | 2.701633125  | 0.007067757 | 0.014063174 | no |
| LOC202181 | 0.101778713  | 2.701061563  | 0.007079786 | 0.014085723 | no |
| NRSN2     | -0.101765072 | -2.70069577  | 0.007087494 | 0.014099671 | no |
| C10orf105 | 0.10174314   | 2.700107634  | 0.007099904 | 0.014122969 | no |
| PGP       | -0.10174018  | -2.700028259 | 0.00710158  | 0.014124914 | no |
| VIPAR     | -0.101732116 | -2.699812004 | 0.007106149 | 0.014132611 | no |
| AFAP1L1   | 0.101730436  | 2.699766957  | 0.007107101 | 0.014133114 | no |
| SERF1A    | -0.101716983 | -2.699406202 | 0.007114729 | 0.014146892 | no |
| BPGM      | 0.101698803  | 2.698918704  | 0.00712505  | 0.01416602  | no |
| COASY     | -0.101686073 | -2.698577733 | 0.007132284 | 0.014179009 | no |
| FLAD1     | 0.101661796  | 2.697926338  | 0.007146099 | 0.014205077 | no |
| BOD1L     | -0.101648785 | -2.69757743  | 0.007153514 | 0.014218417 | no |
| MBD3      | -0.101642346 | -2.69740479  | 0.007157185 | 0.014224315 | no |
| PEX11G    | 0.101630551  | 2.697088505  | 0.007163915 | 0.014236291 | no |
| ST3GAL2   | 0.101621075  | 2.696834404  | 0.007169326 | 0.014244837 | no |
| ADSL      | 0.101620553  | 2.696820401  | 0.007169624 | 0.014244837 | no |
| HESRG     | -0.101617508 | -2.696738754 | 0.007171364 | 0.014246893 | no |
| KLHL4     | 0.101614747  | 2.696664705  | 0.007172942 | 0.014248628 | no |
| B9D1      | 0.101611784  | 2.696585261  | 0.007174635 | 0.014250591 | no |
| RASSF9    | 0.101597215  | 2.69619459   | 0.007182967 | 0.014265739 | no |
| SSR4      | 0.101587702  | 2.695939513  | 0.007188412 | 0.01427515  | no |
| LARP7     | 0.101544845  | 2.694790315  | 0.007212988 | 0.014322549 | no |
| STK11     | -0.101539757 | -2.694653878 | 0.007215911 | 0.014326945 | no |
| TP53INP2  | 0.101513471  | 2.69394903   | 0.007231027 | 0.014355549 | no |
| PCDH9     | -0.101510346 | -2.693865235 | 0.007232826 | 0.014357711 | no |
| LRRC10B   | -0.101507977 | -2.693801715 | 0.00723419  | 0.014357787 | no |
| LOC285780 | -0.101507812 | -2.693797304 | 0.007234285 | 0.014357787 | no |
| PHACTR2   | 0.101475938  | 2.692942616  | 0.007252661 | 0.014392844 | no |
| ACP1      | 0.101459884  | 2.692512144  | 0.007261932 | 0.014409828 | no |
| KLHL9     | -0.101456371 | -2.692417947 | 0.007263962 | 0.014412442 | no |
| C1orf115  | -0.101439404 | -2.691963002 | 0.007273774 | 0.014430494 | no |
| RBM34     | -0.101386733 | -2.690550723 | 0.00730431  | 0.014489652 | no |
| ACADL     | 0.101381816  | 2.690418898  | 0.007307166 | 0.014493896 | no |
| NHSL1     | -0.101350148 | -2.689569786 | 0.007325587 | 0.014529009 | no |
| GCNT2     | -0.101339573 | -2.689286218 | 0.007331748 | 0.014539803 | no |
| UQCRC1    | -0.101317619 | -2.688697597 | 0.007344552 | 0.014563766 | no |
| ECH1      | -0.101294077 | -2.688066371 | 0.007358305 | 0.014589607 | no |
| CLK3      | -0.101274199 | -2.6875334   | 0.007369936 | 0.014611234 | no |
| COQ9      | -0.101265228 | -2.687292849 | 0.00737519  | 0.014620218 | no |

|           |              |              |             |             |    |
|-----------|--------------|--------------|-------------|-------------|----|
| USP2      | -0.101236807 | -2.686530841 | 0.007391858 | 0.014651822 | no |
| ACOT7     | -0.101234534 | -2.686469885 | 0.007393193 | 0.014653031 | no |
| IMP4      | -0.101219313 | -2.686061787 | 0.007402135 | 0.014669316 | no |
| SAP30BP   | -0.101216174 | -2.68597764  | 0.00740398  | 0.014671534 | no |
| TPI1P2    | 0.101207789  | 2.685752803  | 0.007408911 | 0.014679868 | no |
| DNAH12    | 0.101199262  | 2.68552419   | 0.007413929 | 0.01468837  | no |
| SFTA2     | 0.101132708  | 2.683739791  | 0.007453197 | 0.014764721 | no |
| HSPE1     | 0.10112773   | 2.683606313  | 0.007456142 | 0.014769108 | no |
| RAPGEF6   | 0.101114163  | 2.683242589  | 0.007464172 | 0.014783566 | no |
| DGCR8     | -0.101105149 | -2.683000894 | 0.007469513 | 0.014792694 | no |
| CHMP5     | 0.101093335  | 2.682684156  | 0.007476516 | 0.014805113 | no |
| KIAA0240  | -0.101090834 | -2.682617103 | 0.007478    | 0.0148066   | no |
| KNTC1     | 0.10107978   | 2.682320745  | 0.007484559 | 0.014818137 | no |
| SPEM1     | -0.101055717 | -2.681675612 | 0.007498856 | 0.014844989 | no |
| EFCAB4A   | 0.101040826  | 2.681276374  | 0.007507716 | 0.014859845 | no |
| WBSCR17   | -0.101040633 | -2.68127121  | 0.007507831 | 0.014859845 | no |
| CORO2A    | 0.101032694  | 2.681058356  | 0.007512558 | 0.014867747 | no |
| FAM13AOS  | -0.101030431 | -2.680997689 | 0.007513906 | 0.014868959 | no |
| CCDC64    | -0.101028562 | -2.680947576 | 0.00751502  | 0.014869707 | no |
| IGSF9B    | -0.101010363 | -2.680459644 | 0.00752587  | 0.01488972  | no |
| ADCK5     | -0.101001042 | -2.680209752 | 0.007531433 | 0.014899267 | no |
| COQ7      | -0.10098038  | -2.679655806 | 0.007543776 | 0.014922226 | no |
| METTL2A   | -0.100976729 | -2.679557927 | 0.007545959 | 0.014925084 | no |
| C8orf73   | 0.100973605  | 2.679474186  | 0.007547827 | 0.014927318 | no |
| ANO4      | -0.100959613 | -2.679099049 | 0.007556201 | 0.014942417 | no |
| CCDC7     | 0.100954223  | 2.678954555  | 0.007559429 | 0.014947338 | no |
| ITIH4     | 0.100939208  | 2.678552001  | 0.007568427 | 0.014963667 | no |
| ZNF12     | 0.100934825  | 2.678434505  | 0.007571055 | 0.014967399 | no |
| SEMA3F    | 0.100923457  | 2.678129722  | 0.007577877 | 0.01497942  | no |
| LRRC43    | 0.100911496  | 2.677809059  | 0.007585059 | 0.014992153 | no |
| DAND5     | -0.100899521 | -2.677488038 | 0.007592256 | 0.015004911 | no |
| FOXL2     | 0.100895775  | 2.67738759   | 0.007594509 | 0.015007897 | no |
| MICALCL   | 0.100892326  | 2.677295148  | 0.007596584 | 0.015010528 | no |
| WDR34     | 0.100888151  | 2.677183217  | 0.007599096 | 0.015014025 | no |
| FAM104A   | -0.100859064 | -2.676403409 | 0.007616618 | 0.015047174 | no |
| SUV420H2  | -0.100857797 | -2.676369459 | 0.007617381 | 0.015047212 | no |
| CTAGE4    | 0.100854342  | 2.676276827  | 0.007619465 | 0.015049859 | no |
| LOC374491 | -0.100844359 | -2.676009193 | 0.00762549  | 0.015060286 | no |
| LOC389333 | 0.100789652  | 2.674542599  | 0.007658576 | 0.015124109 | no |
| APOBEC4   | 0.100787909  | 2.674495856  | 0.007659633 | 0.015124109 | no |
| DMWD      | -0.100787222 | -2.674477439 | 0.007660049 | 0.015124109 | no |
| FLJ39609  | -0.100761488 | -2.673787555 | 0.007675661 | 0.015153453 | no |
| HMSD      | 0.100750315  | 2.67348803   | 0.007682448 | 0.015165371 | no |
| KIF4A     | 0.100748142  | 2.673429781  | 0.007683768 | 0.015166496 | no |
| KPNA6     | 0.100740473  | 2.673224203  | 0.00768843  | 0.015173226 | no |
| KTELC1    | 0.100740065  | 2.673213248  | 0.007688678 | 0.015173226 | no |
| SGK223    | 0.100717493  | 2.67260816   | 0.007702415 | 0.015198852 | no |
| CCDC123   | 0.100692386  | 2.671935086  | 0.007717722 | 0.015227568 | no |
| C5orf4    | -0.100668541 | -2.671295865 | 0.007732283 | 0.015254135 | no |
| KCNK1     | -0.100667866 | -2.671277791 | 0.007732695 | 0.015254135 | no |
| SLC5A5    | 0.100656978  | 2.670985916  | 0.007739353 | 0.015264439 | no |

|          |              |              |             |             |    |
|----------|--------------|--------------|-------------|-------------|----|
| AFG3L1   | -0.100656855 | -2.670982606 | 0.007739428 | 0.015264439 | no |
| MOB2     | -0.100652797 | -2.670873835 | 0.007741911 | 0.015267845 | no |
| SCG5     | -0.100634552 | -2.670384725 | 0.007753082 | 0.015288385 | no |
| NRBP2    | -0.100627625 | -2.670199036 | 0.007757327 | 0.015295263 | no |
| PTH2R    | -0.10061898  | -2.669967304 | 0.007762627 | 0.015304222 | no |
| EYA2     | 0.100596588  | 2.669367031  | 0.007776372 | 0.015329826 | no |
| MAP1S    | -0.100591862 | -2.669240343 | 0.007779276 | 0.015334055 | no |
| MRPL45   | -0.100588616 | -2.669153341 | 0.007781271 | 0.015334998 | no |
| TMEM205  | 0.100588615  | 2.669153304  | 0.007781271 | 0.015334998 | no |
| MRRF     | 0.100584133  | 2.669033155  | 0.007784027 | 0.015338933 | no |
| SCN7A    | 0.100568806  | 2.668622308  | 0.007793455 | 0.015356016 | no |
| KIAA0802 | -0.100532534 | -2.667649972 | 0.00781581  | 0.015398563 | no |
| ZFAND3   | -0.100523084 | -2.667396655 | 0.007821644 | 0.015408554 | no |
| C9orf72  | 0.100515786  | 2.667201027  | 0.007826151 | 0.015415932 | no |
| OR52H1   | 0.100469872  | 2.665970282  | 0.007854564 | 0.015470392 | no |
| ZNF593   | 0.100464538  | 2.665827283  | 0.007857871 | 0.015475398 | no |
| DDX23    | -0.100452398 | -2.665501876 | 0.007865401 | 0.015488202 | no |
| CD300LG  | -0.100451587 | -2.665480141 | 0.007865905 | 0.015488202 | no |
| DKK3     | 0.100448993  | 2.66541059   | 0.007867515 | 0.015489865 | no |
| RASSF4   | -0.1004465   | -2.665343779 | 0.007869062 | 0.015490614 | no |
| ADCY1    | -0.100445911 | -2.665327989 | 0.007869428 | 0.015490614 | no |
| SGEF     | -0.100436439 | -2.665074092 | 0.007875311 | 0.015500685 | no |
| UMODL1   | 0.100410539  | 2.664379826  | 0.007891417 | 0.015530875 | no |
| TSP02    | -0.10040434  | -2.664213663 | 0.007895277 | 0.015536958 | no |
| STAM     | -0.100398555 | -2.664058598 | 0.00789888  | 0.015541253 | no |
| RRP8     | 0.100397877  | 2.664040427  | 0.007899302 | 0.015541253 | no |
| C4orf50  | -0.100395966 | -2.663989189 | 0.007900493 | 0.015541253 | no |
| MYOM1    | -0.100395899 | -2.663987412 | 0.007900534 | 0.015541253 | no |
| HOMER1   | -0.100381056 | -2.663589538 | 0.007909787 | 0.015557942 | no |
| PART1    | 0.100373866  | 2.66339682   | 0.007914273 | 0.01556525  | no |
| C17orf67 | 0.100285262  | 2.661021837  | 0.007969738 | 0.01567281  | no |
| CHRND    | 0.100254564  | 2.660199009  | 0.007989035 | 0.015709232 | no |
| TAAR1    | 0.100252956  | 2.660155888  | 0.007990048 | 0.015709695 | no |
| TTC37    | 0.10023426   | 2.65965477   | 0.008001822 | 0.015731315 | no |
| PPIE     | 0.100220094  | 2.659275069  | 0.008010754 | 0.015747344 | no |
| RMND1    | -0.100213568 | -2.659100152 | 0.008014872 | 0.015753906 | no |
| MFSD8    | 0.100207384  | 2.658934403  | 0.008018776 | 0.015760047 | no |
| VWCE     | -0.100200285 | -2.658744124 | 0.008023259 | 0.015765701 | no |
| EFNB3    | -0.100199965 | -2.658735555 | 0.008023461 | 0.015765701 | no |
| SLC25A40 | 0.100199125  | 2.658713028  | 0.008023992 | 0.015765701 | no |
| OPRM1    | -0.100174685 | -2.658057974 | 0.008039445 | 0.015794529 | no |
| HCRTR1   | -0.100165222 | -2.65780433  | 0.008045436 | 0.015804509 | no |
| SMN1     | 0.100163443  | 2.657756649  | 0.008046562 | 0.015804509 | no |
| KATNA1   | 0.100162957  | 2.657743625  | 0.00804687  | 0.015804509 | no |
| KRTCAP3  | -0.100144062 | -2.657237181 | 0.008058846 | 0.015826493 | no |
| EFCAB1   | 0.100137168  | 2.657052386  | 0.008063219 | 0.015833544 | no |
| TXLNG    | -0.100126085 | -2.656755324 | 0.008070255 | 0.01584582  | no |
| THAP7    | -0.100081935 | -2.655572003 | 0.008098334 | 0.015898123 | no |
| C22orf46 | -0.100081729 | -2.655566477 | 0.008098465 | 0.015898123 | no |
| SLC38A7  | 0.100052856  | 2.654792612  | 0.008116876 | 0.015932121 | no |
| PLD2     | 0.100052098  | 2.654772291  | 0.00811736  | 0.015932121 | no |

|           |              |              |             |             |    |
|-----------|--------------|--------------|-------------|-------------|----|
| C1orf51   | -0.100041015 | -2.654475263 | 0.008124437 | 0.015943096 | no |
| ACTG2     | 0.100040872  | 2.654471414  | 0.008124528 | 0.015943096 | no |
| 1-Dec     | 0.100033651  | 2.654277891  | 0.008129142 | 0.015950601 | no |
| POU3F4    | -0.100015567 | -2.653793195 | 0.008140708 | 0.015971745 | no |
| WDR82     | -0.099997794 | -2.653316838 | 0.00815209  | 0.015992523 | no |
| PRB2      | -0.099995623 | -2.653258654 | 0.008153481 | 0.015993701 | no |
| PDCD7     | -0.099975081 | -2.652708098 | 0.008166655 | 0.016017988 | no |
| HERPUD2   | 0.099968874  | 2.652541734  | 0.008170639 | 0.016024249 | no |
| CDIPT     | -0.099967462 | -2.652503902 | 0.008171546 | 0.016024323 | no |
| ADAM33    | 0.099965166  | 2.652442349  | 0.00817302  | 0.016024323 | no |
| C17orf101 | 0.099965113  | 2.652440929  | 0.008173054 | 0.016024323 | no |
| LYPLA2    | 0.099961936  | 2.652355807  | 0.008175094 | 0.016026768 | no |
| EPHB6     | -0.099952155 | -2.652093654 | 0.00818138  | 0.016037535 | no |
| C12orf10  | -0.099948874 | -2.65200571  | 0.008183489 | 0.016040115 | no |
| LOC162632 | -0.099933115 | -2.651583342 | 0.008193628 | 0.01605843  | no |
| INPP5E    | -0.09992804  | -2.651447336 | 0.008196895 | 0.016063276 | no |
| IRX5      | 0.099920593  | 2.651247737  | 0.008201691 | 0.016071118 | no |
| CXorf48   | -0.099890827 | -2.650449981 | 0.008220888 | 0.016107173 | no |
| RPL13     | -0.099888922 | -2.650398938 | 0.008222118 | 0.016108021 | no |
| KIAA0317  | -0.099856788 | -2.649537717 | 0.008242889 | 0.01614715  | no |
| OSCP1     | 0.099840892  | 2.649111699  | 0.008253182 | 0.016165746 | no |
| HMG2      | 0.099820067  | 2.648553568  | 0.008266684 | 0.016190624 | no |
| TMEM158   | 0.099796343  | 2.647917775  | 0.008282088 | 0.016219223 | no |
| ZNF295    | 0.099790163  | 2.647752147  | 0.008286105 | 0.016225519 | no |
| NOC3L     | 0.099774909  | 2.647343331  | 0.008296028 | 0.016243376 | no |
| SFRS2     | 0.09974962   | 2.646665588  | 0.008312503 | 0.0162731   | no |
| RAC1      | 0.099749134  | 2.646652572  | 0.008312819 | 0.0162731   | no |
| PPP4R2    | 0.099738977  | 2.646380365  | 0.008319444 | 0.016284493 | no |
| CRB3      | -0.099733435 | -2.646231847 | 0.008323061 | 0.016289995 | no |
| SULT1A1   | 0.099731591  | 2.646182421  | 0.008324265 | 0.016290774 | no |
| MPP7      | -0.099702925 | -2.6454142   | 0.008342998 | 0.016325854 | no |
| SYT2      | -0.099696375 | -2.645238658 | 0.008347283 | 0.01633266  | no |
| HMHB1     | 0.09967925   | 2.644779712  | 0.008358498 | 0.01635302  | no |
| VAMP1     | -0.099666414 | -2.644435729 | 0.008366912 | 0.016367898 | no |
| C1QL3     | -0.099661843 | -2.644313216 | 0.00836991  | 0.01637218  | no |
| SPIN2A    | -0.099659064 | -2.644238761 | 0.008371733 | 0.016374161 | no |
| NPAT      | -0.099656466 | -2.64416913  | 0.008373438 | 0.016375912 | no |
| VDAC1     | 0.099638743  | 2.643694181  | 0.008385076 | 0.016397086 | no |
| MGC87042  | 0.09962212   | 2.643248705  | 0.008396006 | 0.01641687  | no |
| MGC2889   | -0.09961542  | -2.64306913  | 0.008400415 | 0.016423143 | no |
| ACTR1B    | -0.099614777 | -2.643051904 | 0.008400838 | 0.016423143 | no |
| C11orf86  | 0.099595242  | 2.642528391  | 0.008413704 | 0.016446706 | no |
| STAU2     | -0.099592433 | -2.64245312  | 0.008415556 | 0.016447294 | no |
| MYO5B     | 0.099592317  | 2.642450003  | 0.008415633 | 0.016447294 | no |
| EMX1      | -0.099584431 | -2.642238691 | 0.008420832 | 0.016455866 | no |
| SKIV2L2   | -0.099551697 | -2.641361458 | 0.008442448 | 0.016496513 | no |
| CPT1B     | -0.099521538 | -2.640553259 | 0.008462407 | 0.016533915 | no |
| MFN1      | 0.099518656  | 2.640476022  | 0.008464317 | 0.016534954 | no |
| C12orf62  | 0.099518267  | 2.640465602  | 0.008464575 | 0.016534954 | no |
| LOC728024 | 0.099505853  | 2.64013294   | 0.008472804 | 0.016549431 | no |
| SLC6A15   | -0.099487006 | -2.639627887 | 0.008485312 | 0.01657226  | no |

|              |              |              |             |             |    |
|--------------|--------------|--------------|-------------|-------------|----|
| DMRTA2       | 0.099482401  | 2.639504475  | 0.008488371 | 0.016576633 | no |
| TMEM126B     | 0.099479428  | 2.639424815  | 0.008490346 | 0.016578889 | no |
| STYXL1       | 0.099475617  | 2.639322679  | 0.008492879 | 0.016582233 | no |
| QTRT1        | -0.099453867 | -2.63873984  | 0.008507345 | 0.016608875 | no |
| CRYM         | -0.09943701  | -2.638288115 | 0.008518572 | 0.016629188 | no |
| EIF2C3       | 0.099427263  | 2.638026939  | 0.00852507  | 0.016640265 | no |
| PCOLCE2      | 0.099421052  | 2.637860506  | 0.008529213 | 0.016646744 | no |
| TGM5         | 0.099419509  | 2.637819136  | 0.008530243 | 0.016647147 | no |
| ZAR1         | 0.099391571  | 2.637070503  | 0.008548901 | 0.01668195  | no |
| GRASP        | -0.099385049 | -2.636895719 | 0.008553263 | 0.016688851 | no |
| WDR65        | 0.099361307  | 2.636259527  | 0.008569155 | 0.016718246 | no |
| GTF2H2B      | 0.099357307  | 2.636152319  | 0.008571836 | 0.016721862 | no |
| FOXP4        | -0.099349855 | -2.635952642 | 0.008576831 | 0.016729992 | no |
| RNF215       | -0.099343434 | -2.635780585 | 0.008581137 | 0.016736777 | no |
| PTPRO        | 0.099296267  | 2.634516692  | 0.008612828 | 0.016796966 | no |
| C3orf24      | 0.099255146  | 2.633414816  | 0.008640541 | 0.016849389 | no |
| MRPS26       | -0.099244712 | -2.633135211 | 0.008647586 | 0.016861501 | no |
| SDR16C5      | -0.099234827 | -2.632870351 | 0.008654265 | 0.016872896 | no |
| ARL6IP6      | -0.099222547 | -2.63254129  | 0.008662569 | 0.016887456 | no |
| ANKRD2       | -0.099216143 | -2.632369686 | 0.008666902 | 0.016894275 | no |
| LOC100128811 | -0.099198316 | -2.631892027 | 0.008678973 | 0.016916175 | no |
| CIDECP       | -0.099194412 | -2.631787407 | 0.008681619 | 0.016919701 | no |
| P2RY1        | 0.099187118  | 2.631591976  | 0.008686564 | 0.016927706 | no |
| FOXK1        | -0.099169877 | -2.631129983 | 0.008698263 | 0.01694887  | no |
| ADAMTS9      | 0.099161994  | 2.630918776  | 0.008703616 | 0.016957667 | no |
| GIPC3        | 0.099158961  | 2.630837505  | 0.008705677 | 0.016960047 | no |
| UNC5C        | 0.099151211  | 2.63062984   | 0.008710944 | 0.016968674 | no |
| STAG3        | 0.099145986  | 2.630489842  | 0.008714497 | 0.016973959 | no |
| GMFB         | -0.099088843 | -2.628958701 | 0.008753436 | 0.017048161 | no |
| C13orf23     | -0.099073854 | -2.628557093 | 0.008763675 | 0.017066459 | no |
| TSPYL6       | -0.099063969 | -2.628292226 | 0.008770434 | 0.017077976 | no |
| HOXD11       | 0.099052216  | 2.627977322  | 0.008778475 | 0.017091989 | no |
| SUCLG1       | -0.099040773 | -2.627670713 | 0.008786312 | 0.017105599 | no |
| PALM3        | 0.099011593  | 2.626888867  | 0.008806322 | 0.017142906 | no |
| DDX49        | -0.099005976 | -2.626738353 | 0.008810179 | 0.017148763 | no |
| MTPP         | 0.098991333  | 2.626346027  | 0.00882024  | 0.017166693 | no |
| LOC100133893 | -0.098977681 | -2.62598023  | 0.008829629 | 0.017183313 | no |
| C10orf95     | -0.098972509 | -2.625841668 | 0.008833188 | 0.017188585 | no |
| INHA         | -0.098962992 | -2.625586667 | 0.008839741 | 0.017199681 | no |
| BMPR1A       | -0.098953376 | -2.625329024 | 0.008846367 | 0.017210916 | no |
| KCTD17       | -0.098947272 | -2.625165478 | 0.008850575 | 0.017217446 | no |
| INSL4        | 0.098945491  | 2.625117764  | 0.008851803 | 0.017218178 | no |
| ARID4B       | -0.098930161 | -2.624707027 | 0.00886238  | 0.017237095 | no |
| C1orf228     | 0.098903326  | 2.62398801   | 0.008880924 | 0.0172715   | no |
| CRYBA4       | 0.098887163  | 2.623554958  | 0.008892109 | 0.017291589 | no |
| RAB3GAP2     | 0.098858223  | 2.62277958   | 0.008912167 | 0.017328929 | no |
| MGC12982     | 0.098835568  | 2.622172601  | 0.008927898 | 0.017357846 | no |
| CCNE1        | 0.098825703  | 2.62190829   | 0.008934755 | 0.017369508 | no |
| OSBPL8       | -0.098819692 | -2.621747265 | 0.008938936 | 0.017375964 | no |
| LOC727924    | -0.098813867 | -2.621591183 | 0.008942989 | 0.017382172 | no |
| UBE2D4       | 0.098802098  | 2.621275873  | 0.008951183 | 0.017396426 | no |

|              |              |              |             |             |    |
|--------------|--------------|--------------|-------------|-------------|----|
| ZNF439       | -0.098775651 | -2.620567309 | 0.00896962  | 0.017430583 | no |
| POLE2        | 0.098753964  | 2.619986258  | 0.008984765 | 0.017458336 | no |
| NDUFB9       | -0.098729647 | -2.619334785 | 0.009001773 | 0.017487141 | no |
| LOC100130264 | -0.098729623 | -2.619334124 | 0.00900179  | 0.017487141 | no |
| PAPD7        | -0.098729059 | -2.619319033 | 0.009002184 | 0.017487141 | no |
| CWF19L1      | -0.098724785 | -2.619204519 | 0.009005177 | 0.017491274 | no |
| LASS4        | -0.098702778 | -2.618614911 | 0.0090206   | 0.017519547 | no |
| PCDHAC2      | -0.098698068 | -2.618488728 | 0.009023903 | 0.01752428  | no |
| COPS4        | 0.098680302  | 2.618012754  | 0.009036375 | 0.017546814 | no |
| LOC642846    | -0.098651914 | -2.617252213 | 0.009056335 | 0.017583883 | no |
| BIRC6        | -0.098649814 | -2.617195952 | 0.009057813 | 0.017585064 | no |
| GJD2         | -0.098625114 | -2.61653423  | 0.009075214 | 0.017617155 | no |
| C1orf192     | 0.098619076  | 2.616372448  | 0.009079472 | 0.01762373  | no |
| OR14I1       | -0.098594411 | -2.61571166  | 0.009096886 | 0.017655836 | no |
| RNF169       | -0.098575543 | -2.615206187 | 0.009110227 | 0.017680031 | no |
| OGDHL        | -0.098550991 | -2.614548427 | 0.009127613 | 0.017712072 | no |
| DNAJC4       | 0.098544451  | 2.614373241  | 0.009132249 | 0.017719367 | no |
| EPN3         | -0.098541047 | -2.614282049 | 0.009134662 | 0.01772235  | no |
| HIST1H4J     | 0.098534467  | 2.614105749  | 0.009139331 | 0.017729705 | no |
| DUSP19       | -0.098518861 | -2.613687677 | 0.00915041  | 0.017749494 | no |
| SHISA6       | -0.098501652 | -2.613226654 | 0.00916264  | 0.017771514 | no |
| C9orf68      | 0.098485329  | 2.612789367  | 0.009174255 | 0.017792335 | no |
| ST6GALNAC6   | -0.098467304 | -2.612306471 | 0.009187097 | 0.01781553  | no |
| TRIM11       | -0.098459302 | -2.612092123 | 0.009192802 | 0.017824884 | no |
| MAB21L2      | 0.098455147  | 2.611980805  | 0.009195766 | 0.017828922 | no |
| WDR45        | 0.098438184  | 2.611526378  | 0.009207875 | 0.017850688 | no |
| GRM3         | -0.098434278 | -2.611421744 | 0.009210666 | 0.017854385 | no |
| KDM2A        | 0.09840534   | 2.610646524  | 0.009231362 | 0.017892788 | no |
| MYO1D        | 0.0983988    | 2.61047132   | 0.009236045 | 0.017900149 | no |
| PPIAL4G      | 0.098384484  | 2.610087807  | 0.009246303 | 0.017918313 | no |
| ZNF416       | 0.098370127  | 2.609703199  | 0.009256602 | 0.017936551 | no |
| FA2H         | -0.098368288 | -2.609653936 | 0.009257921 | 0.017937389 | no |
| HIST2H4A     | 0.098364151  | 2.609543106  | 0.009260891 | 0.017941424 | no |
| UBTD1        | 0.098355038  | 2.609299003  | 0.009267435 | 0.017952382 | no |
| OR10R2       | 0.098329249  | 2.608608144  | 0.009285979 | 0.01798658  | no |
| NOMO3        | -0.098324723 | -2.608486905 | 0.009289236 | 0.017991166 | no |
| CA3          | 0.098309493  | 2.608078914  | 0.009300206 | 0.018010687 | no |
| TCP11L1      | -0.098299791 | -2.607819027 | 0.0093072   | 0.018022412 | no |
| TMEM186      | -0.098298015 | -2.60777143  | 0.009308482 | 0.018022412 | no |
| EIF3K        | 0.098297386  | 2.607754595  | 0.009308935 | 0.018022412 | no |
| GLT6D1       | -0.0982942   | -2.60766925  | 0.009311233 | 0.018022452 | no |
| KBTBD2       | 0.098293741  | 2.607656949  | 0.009311564 | 0.018022452 | no |
| MAX          | 0.09829365   | 2.607654515  | 0.00931163  | 0.018022452 | no |
| GNB2         | 0.098291123  | 2.607586808  | 0.009313453 | 0.018024256 | no |
| TRIM4        | 0.098282183  | 2.607347324  | 0.009319906 | 0.018035018 | no |
| FAM83D       | 0.098253063  | 2.606567263  | 0.009340952 | 0.018074014 | no |
| PRDM15       | -0.098219457 | -2.605667057 | 0.009365293 | 0.018119377 | no |
| MON1A        | -0.098205611 | -2.605296154 | 0.009375338 | 0.018137077 | no |
| TMEM164      | 0.098175837  | 2.604498586  | 0.009396971 | 0.018177188 | no |
| LHX3         | -0.09816657  | -2.60425035  | 0.009403714 | 0.01818849  | no |
| WBSCR22      | 0.09813696   | 2.603457191  | 0.009425286 | 0.01822847  | no |

|            |              |              |             |             |    |
|------------|--------------|--------------|-------------|-------------|----|
| KCNH6      | -0.098124172 | -2.60311465  | 0.009434615 | 0.018244769 | no |
| FOXN3      | -0.098093252 | -2.602286403 | 0.009457209 | 0.018286711 | no |
| EPGN       | 0.098089831  | 2.602194755  | 0.009459712 | 0.018289801 | no |
| GRIK3      | -0.098086955 | -2.602117721 | 0.009461816 | 0.018292121 | no |
| CCDC140    | 0.098056583  | 2.601304164  | 0.009484065 | 0.018333381 | no |
| GTPBP8     | 0.098046456  | 2.601032908  | 0.009491494 | 0.018345988 | no |
| CDC20      | 0.09804404   | 2.600968197  | 0.009493267 | 0.01834766  | no |
| CDC42BPG   | 0.098012761  | 2.600130365  | 0.009516249 | 0.01839032  | no |
| CEP78      | -0.09799087  | -2.599543987 | 0.009532363 | 0.0184197   | no |
| EXOSC10    | 0.09793562   | 2.598064105  | 0.00957314  | 0.018496726 | no |
| IGFBPL1    | -0.097923655 | -2.597743608 | 0.009581991 | 0.01851206  | no |
| ABCA12     | 0.09791386   | 2.597481241  | 0.009589243 | 0.018524147 | no |
| IGF1R      | -0.097912729 | -2.597450951 | 0.00959008  | 0.018524147 | no |
| ZBTB20     | -0.097900131 | -2.597113531 | 0.009599414 | 0.018540405 | no |
| KLK4       | 0.097883908  | 2.596679001  | 0.009611446 | 0.01856187  | no |
| TPH2       | -0.097878987 | -2.59654719  | 0.009615099 | 0.018567151 | no |
| ATG4B      | -0.097847805 | -2.595711991 | 0.009638271 | 0.01861012  | no |
| PDIA2      | -0.097839008 | -2.595476368 | 0.009644817 | 0.018620981 | no |
| DNAI2      | 0.097822216  | 2.595026602  | 0.009657324 | 0.018643347 | no |
| NKX6-1     | 0.097819082  | 2.594942667  | 0.00965966  | 0.018646076 | no |
| ZNF384     | -0.09779094  | -2.5941889   | 0.009680657 | 0.018684823 | no |
| FXN        | -0.097773276 | -2.593715776 | 0.009693857 | 0.018708515 | no |
| MLL5       | -0.097769779 | -2.593622124 | 0.009696472 | 0.018711776 | no |
| ATIC       | -0.097741347 | -2.592860614 | 0.009717757 | 0.018751061 | no |
| NCRNA00120 | -0.097736839 | -2.592739868 | 0.009721136 | 0.018755791 | no |
| FGF8       | -0.097730975 | -2.592582806 | 0.009725533 | 0.018762483 | no |
| ZNF257     | -0.097723071 | -2.592371099 | 0.009731462 | 0.018772131 | no |
| CRHR2      | -0.097720795 | -2.592310142 | 0.00973317  | 0.018773634 | no |
| GIPR       | -0.097714622 | -2.592144816 | 0.009737803 | 0.018780779 | no |
| TJAP1      | -0.097691503 | -2.591525609 | 0.009755174 | 0.018812486 | no |
| ZNF707     | -0.097650467 | -2.59042653  | 0.009786074 | 0.018869176 | no |
| LYNX1      | -0.097649985 | -2.590413644 | 0.009786437 | 0.018869176 | no |
| ZNF528     | 0.09764415   | 2.590257356  | 0.009790838 | 0.018875862 | no |
| ABCF3      | -0.097636016 | -2.590039505 | 0.009796976 | 0.018885894 | no |
| SATL1      | -0.097627013 | -2.589798373 | 0.009803774 | 0.018897197 | no |
| NENF       | 0.097624588  | 2.589733424  | 0.009805605 | 0.018898926 | no |
| C22orf41   | 0.097615136  | 2.589480291  | 0.009812747 | 0.018910888 | no |
| PTH        | 0.097611859  | 2.589392511  | 0.009815225 | 0.01891386  | no |
| PCDHGA10   | -0.097597981 | -2.589020824 | 0.009825723 | 0.018932284 | no |
| ABCC5      | -0.097593848 | -2.588910145 | 0.00982885  | 0.018936506 | no |
| NDUFB8     | -0.097563899 | -2.588108033 | 0.009851545 | 0.018978422 | no |
| FSCN2      | 0.097557777  | 2.587944076  | 0.00985619  | 0.01898556  | no |
| TUBB3      | -0.09754339  | -2.587558753 | 0.009867113 | 0.019004791 | no |
| MAGEA12    | 0.097522292  | 2.586993718  | 0.00988315  | 0.019033867 | no |
| IFNE       | 0.097498936  | 2.586368195  | 0.009900932 | 0.019066296 | no |
| GPC1       | 0.097481158  | 2.585892076  | 0.009914485 | 0.019090578 | no |
| DSP        | 0.097458791  | 2.585293042  | 0.009931562 | 0.019121637 | no |
| C5orf13    | -0.097455379 | -2.585201666 | 0.009934169 | 0.019124835 | no |
| NCKAP5L    | -0.097440332 | -2.584798677 | 0.009945674 | 0.019145162 | no |
| CDRT4      | 0.097435103  | 2.584658637  | 0.009949675 | 0.01915104  | no |
| LOC729603  | 0.097422673  | 2.584325768  | 0.00995919  | 0.01916753  | no |

|             |              |              |             |             |    |
|-------------|--------------|--------------|-------------|-------------|----|
| PRPF4       | 0.09742125   | 2.584287637  | 0.009960281 | 0.019167805 | no |
| NEK4        | -0.097415815 | -2.5841421   | 0.009964444 | 0.019173992 | no |
| FAM43B      | 0.097403475  | 2.583811623  | 0.009973904 | 0.019189635 | no |
| MIF         | 0.097402735  | 2.583791785  | 0.009974472 | 0.019189635 | no |
| STK39       | -0.097394143 | -2.583561684 | 0.009981063 | 0.019200489 | no |
| SPIN1       | -0.097354975 | -2.582512751 | 0.010011161 | 0.019256555 | no |
| ARHGAP20    | 0.097334158  | 2.581955256  | 0.01002719  | 0.019285553 | no |
| ANKRD55     | -0.097299241 | -2.581020163 | 0.010054128 | 0.019335524 | no |
| MYLIP       | 0.097273988  | 2.580343887  | 0.01007365  | 0.019371225 | no |
| C1orf229    | -0.097265341 | -2.58011233  | 0.010080342 | 0.01938225  | no |
| PASK        | 0.097242403  | 2.579498055  | 0.010098114 | 0.019414576 | no |
| MYEOV       | 0.097240603  | 2.579449843  | 0.01009951  | 0.019415413 | no |
| C15orf37    | 0.097238468  | 2.579392669  | 0.010101166 | 0.01941675  | no |
| MRPL46      | -0.097236119 | -2.579329771 | 0.010102988 | 0.019417438 | no |
| HUNK        | -0.09723553  | -2.579314001 | 0.010103445 | 0.019417438 | no |
| ZDHHC3      | 0.097231192  | 2.579197833  | 0.010106811 | 0.01942206  | no |
| AIPL1       | 0.097199239  | 2.578342128  | 0.010131633 | 0.019467911 | no |
| PCSK7       | 0.097187228  | 2.578020502  | 0.010140977 | 0.019484014 | no |
| CHCHD10     | 0.097185686  | 2.577979208  | 0.010142178 | 0.019484468 | no |
| NDUFS1      | -0.097160025 | -2.577292026 | 0.01016217  | 0.019521021 | no |
| PRPF38A     | -0.097126371 | -2.57639081  | 0.010188442 | 0.01956794  | no |
| KCNA6       | -0.097126258 | -2.576387786 | 0.01018853  | 0.01956794  | no |
| NPR1        | 0.097123813  | 2.576322297  | 0.010190442 | 0.019569752 | no |
| ADSS        | 0.097122253  | 2.576280534  | 0.010191661 | 0.019570234 | no |
| RUFY4       | 0.097098458  | 2.575643334  | 0.010210278 | 0.019604122 | no |
| C7orf44     | 0.097083607  | 2.575245641  | 0.010221913 | 0.019624598 | no |
| INVS        | 0.097044542  | 2.574199551  | 0.010252574 | 0.019681594 | no |
| GPR111      | 0.097030403  | 2.573820929  | 0.010263692 | 0.019701066 | no |
| PRX         | -0.097023863 | -2.573645796 | 0.010268838 | 0.019709073 | no |
| IL24        | 0.097020779  | 2.573563231  | 0.010271265 | 0.01971186  | no |
| FGF7        | 0.097019416  | 2.573526726  | 0.010272338 | 0.019712048 | no |
| ATHL1       | 0.096996017  | 2.572900143  | 0.010290775 | 0.019745552 | no |
| LOC402377   | 0.096974025  | 2.57231124   | 0.010308129 | 0.019776974 | no |
| PCGF3       | -0.096967644 | -2.572140378 | 0.010313169 | 0.019784766 | no |
| PLCD4       | -0.096961272 | -2.571969747 | 0.010318205 | 0.019791054 | no |
| ANKRD34A    | -0.096960666 | -2.571953527 | 0.010318683 | 0.019791054 | no |
| ANKRD52     | 0.09695978   | 2.571929819  | 0.010319383 | 0.019791054 | no |
| DOCK9       | -0.096953785 | -2.571769266 | 0.010324124 | 0.019798212 | no |
| RASGRP1     | -0.096952583 | -2.571737085 | 0.010325074 | 0.019798212 | no |
| ZNF274      | -0.096950288 | -2.571675621 | 0.010326889 | 0.019799815 | no |
| NCRNA00204B | 0.096930965  | 2.571158218  | 0.010342183 | 0.019827258 | no |
| RGS17       | 0.096909752  | 2.570590201  | 0.010358996 | 0.019857607 | no |
| AHCTF1      | -0.096890466 | -2.570073759 | 0.010374304 | 0.019885066 | no |
| N4BP2L1     | -0.096877889 | -2.569736996 | 0.010384297 | 0.019902333 | no |
| RAB40B      | -0.096868125 | -2.569475536 | 0.010392061 | 0.019915325 | no |
| PCDHA6      | -0.096864621 | -2.569381732 | 0.010394848 | 0.019915888 | no |
| GOLGA8DP    | -0.096864503 | -2.569378575 | 0.010394941 | 0.019915888 | no |
| NUP98       | 0.096864041  | 2.569366187  | 0.010395309 | 0.019915888 | no |
| PPP1R16B    | -0.096860217 | -2.569263808 | 0.010398352 | 0.019919829 | no |
| EIF2B5      | -0.096855747 | -2.569144102 | 0.01040191  | 0.019924758 | no |
| SLC35B1     | 0.096842844  | 2.568798614  | 0.010412186 | 0.019942552 | no |



|           |              |              |             |             |    |
|-----------|--------------|--------------|-------------|-------------|----|
| CSPP1     | 0.096824154  | 2.568298148  | 0.010427088 | 0.019967368 | no |
| COPA      | 0.096823964  | 2.56829307   | 0.010427239 | 0.019967368 | no |
| HIST1H4I  | 0.096822878  | 2.568263993  | 0.010428106 | 0.019967368 | no |
| CCDC155   | 0.096813662  | 2.568017218  | 0.010435461 | 0.01997956  | no |
| CAMKK2    | -0.096786513 | -2.567290272 | 0.010457156 | 0.0200192   | no |
| CCDC53    | 0.096766233  | 2.566747246  | 0.010473388 | 0.020048377 | no |
| GPR17     | -0.096740154 | -2.566048971 | 0.010494293 | 0.020086493 | no |
| SMTN      | 0.096726194  | 2.565675168  | 0.0105055   | 0.020106039 | no |
| ALMS1P    | -0.096711213 | -2.565274056 | 0.010517537 | 0.020127172 | no |
| RERG      | 0.096709846  | 2.565237459  | 0.010518636 | 0.02012737  | no |
| MSTO1     | 0.096703614  | 2.565070574  | 0.010523648 | 0.020135055 | no |
| TRAPPC5   | 0.09669574   | 2.564859756  | 0.010529983 | 0.020141916 | no |
| ADCY9     | 0.096695702  | 2.564858743  | 0.010530014 | 0.020141916 | no |
| C14orf37  | -0.096695442 | -2.564851771 | 0.010530223 | 0.020141916 | no |
| TCP11L2   | 0.096663083  | 2.563985351  | 0.010556294 | 0.020189873 | no |
| FKRP      | 0.096658315  | 2.56385769   | 0.01056014  | 0.020195319 | no |
| MCM8      | 0.096652039  | 2.563689651  | 0.010565205 | 0.020203094 | no |
| C2orf56   | 0.096627537  | 2.563033611  | 0.010584999 | 0.02023903  | no |
| TARBP1    | -0.096615955 | -2.562723494 | 0.010594367 | 0.020255026 | no |
| EHD1      | -0.096611788 | -2.562611943 | 0.010597738 | 0.020259557 | no |
| CCL28     | 0.096558905  | 2.561196027  | 0.010640617 | 0.020339604 | no |
| KIAA0174  | -0.096550479 | -2.560970403 | 0.010647464 | 0.020350269 | no |
| GJA8      | 0.096549561  | 2.56094584   | 0.010648209 | 0.020350269 | no |
| POLR1E    | -0.096546446 | -2.560862431 | 0.010650742 | 0.020353185 | no |
| GTPBP2    | 0.096534833  | 2.560551513  | 0.010660186 | 0.020369307 | no |
| PRICKLE4  | -0.096530075 | -2.560424127 | 0.010664058 | 0.02037478  | no |
| DLGAP5    | 0.096500321  | 2.559627472  | 0.010688298 | 0.020419165 | no |
| IGFL3     | 0.09648155   | 2.559124905  | 0.010703616 | 0.020446495 | no |
| MYOZ1     | -0.096459148 | -2.558525116 | 0.010721922 | 0.02047953  | no |
| SLC17A3   | 0.096441907  | 2.558063529  | 0.010736029 | 0.020504538 | no |
| C17orf102 | -0.096419188 | -2.557455256 | 0.010754645 | 0.020538151 | no |
| C19orf12  | 0.096377116  | 2.556328874  | 0.010789192 | 0.020602181 | no |
| BRDT      | -0.096375542 | -2.55628673  | 0.010790487 | 0.020602707 | no |
| FASTKD3   | 0.096373568  | 2.556233862  | 0.010792111 | 0.020603862 | no |
| LOC349114 | -0.096321058 | -2.554828029 | 0.010835379 | 0.020684514 | no |
| BCM01     | 0.096311997  | 2.554585461  | 0.01084286  | 0.020696841 | no |
| SLC29A4   | -0.09630632  | -2.554433469 | 0.01084755  | 0.020703839 | no |
| YPEL2     | 0.096298664  | 2.554228496  | 0.010853878 | 0.02071396  | no |
| LRRC67    | 0.096287497  | 2.553929547  | 0.010863112 | 0.020729628 | no |
| CCDC86    | 0.096267716  | 2.553399966  | 0.010879489 | 0.020758919 | no |
| CBWD2     | 0.096257205  | 2.553118561  | 0.0108882   | 0.020773579 | no |
| EVI5      | 0.096243641  | 2.552755427  | 0.010899449 | 0.020793081 | no |
| ZCCHC10   | 0.096240228  | 2.552664039  | 0.010902282 | 0.020796523 | no |
| FAM200B   | -0.096231502 | -2.552430433 | 0.010909527 | 0.020808378 | no |
| PLEKHG4B  | 0.096212449  | 2.551920356  | 0.010925359 | 0.020836611 | no |
| C2orf79   | 0.096209259  | 2.551834964  | 0.010928012 | 0.020839705 | no |
| POLR3GL   | -0.096166991 | -2.550703379 | 0.010963217 | 0.020903557 | no |
| POLA2     | 0.096166576  | 2.550692276  | 0.010963563 | 0.020903557 | no |
| ARFIP2    | -0.096164984 | -2.550649636 | 0.010964892 | 0.020903913 | no |
| CDKL1     | -0.096163874 | -2.550619929 | 0.010965817 | 0.020903913 | no |
| IQGAP3    | 0.096153577  | 2.550344281  | 0.01097441  | 0.020918321 | no |

|              |              |              |             |             |    |
|--------------|--------------|--------------|-------------|-------------|----|
| ZBTB7C       | 0.096131141  | 2.549743642  | 0.010993155 | 0.020952075 | no |
| SLC22A9      | -0.096109823 | -2.549172942 | 0.011010992 | 0.020984092 | no |
| ADH1B        | 0.096084717  | 2.548500835  | 0.011032031 | 0.021022206 | no |
| DSTN         | 0.096072524  | 2.548174415  | 0.011042262 | 0.021039719 | no |
| MTVR2        | 0.096065416  | 2.547984133  | 0.01104823  | 0.021049106 | no |
| PRRT4        | -0.09605794  | -2.547783999 | 0.01105451  | 0.021059086 | no |
| PEG10        | -0.096053605 | -2.547667941 | 0.011058153 | 0.021064042 | no |
| RBL1         | 0.096017143  | 2.546691833  | 0.011088837 | 0.0211205   | no |
| FAM83H       | 0.096004316  | 2.546348467  | 0.011099649 | 0.021139101 | no |
| SPOCK1       | -0.095996392 | -2.546136343 | 0.011106332 | 0.021149838 | no |
| TMEM131      | 0.095989382  | 2.545948693  | 0.011112248 | 0.02115911  | no |
| FAT4         | 0.095987609  | 2.545901223  | 0.011113745 | 0.021159546 | no |
| YPEL5        | 0.095986632  | 2.545875061  | 0.01111457  | 0.021159546 | no |
| TUBB2B       | -0.095933311 | -2.544447667 | 0.011159669 | 0.021243404 | no |
| FAM167A      | -0.095923804 | -2.544193178 | 0.011167727 | 0.021256742 | no |
| HSPB6        | 0.0959215    | 2.544131497  | 0.011169681 | 0.021258459 | no |
| FAM47E       | -0.095903236 | -2.5436426   | 0.011185178 | 0.021285949 | no |
| FAM127A      | -0.095872159 | -2.542810692 | 0.011211591 | 0.021334207 | no |
| CHDH         | -0.095864529 | -2.542606443 | 0.011218084 | 0.021344554 | no |
| DOHH         | -0.095839217 | -2.541928874 | 0.011239649 | 0.021383573 | no |
| WDR11        | 0.095832399  | 2.541746356  | 0.011245465 | 0.021392624 | no |
| PARD3B       | -0.095816118 | -2.541310546 | 0.011259361 | 0.021417045 | no |
| MPZL1        | 0.09579654   | 2.540786463  | 0.011276093 | 0.021446852 | no |
| CDKN2C       | 0.09577599   | 2.540236384  | 0.011293678 | 0.021478278 | no |
| ANKS6        | -0.095774641 | -2.540200272 | 0.011294833 | 0.021478455 | no |
| CRLS1        | -0.095752773 | -2.539614897 | 0.011313575 | 0.021512072 | no |
| HYOU1        | 0.095746875  | 2.539457031  | 0.011318634 | 0.021519668 | no |
| C19orf34     | 0.095740996  | 2.539299644  | 0.01132368  | 0.021527237 | no |
| BOLA1        | -0.095727972 | -2.538951044 | 0.011334863 | 0.021546471 | no |
| C1orf50      | 0.095707968  | 2.538415565  | 0.011352061 | 0.021577133 | no |
| LGI3         | -0.095691553 | -2.537976175 | 0.011366189 | 0.021601957 | no |
| LIG3         | -0.095667759 | -2.537339275 | 0.011386697 | 0.021638898 | no |
| RBM11        | -0.095652148 | -2.536921412 | 0.01140017  | 0.021662465 | no |
| C17orf103    | 0.095636409  | 2.536500124  | 0.011413767 | 0.021686265 | no |
| ISCA2        | 0.09562914   | 2.536305556  | 0.011420052 | 0.021696167 | no |
| LOC400752    | -0.095590002 | -2.535257947 | 0.011453944 | 0.021758511 | no |
| ARSF         | 0.095576192  | 2.534888292  | 0.011465924 | 0.021779223 | no |
| PLEC         | -0.095563177 | -2.534539927 | 0.011477224 | 0.02179864  | no |
| NDFIP2       | -0.095556214 | -2.534353539 | 0.011483274 | 0.021808082 | no |
| FIZ1         | -0.095525304 | -2.533526214 | 0.011510164 | 0.021857095 | no |
| LOC100132724 | 0.095517934  | 2.533328929  | 0.011516584 | 0.021867233 | no |
| RAB12        | 0.095515194  | 2.533255586  | 0.011518972 | 0.021869713 | no |
| OR51B5       | 0.095513197  | 2.533202155  | 0.011520712 | 0.021870962 | no |
| ANKRD39      | -0.09549326  | -2.532668495 | 0.0115381   | 0.021901916 | no |
| SLC39A5      | -0.095456731 | -2.531690778 | 0.011570019 | 0.021958995 | no |
| DLX4         | 0.095456362  | 2.531680887  | 0.011570342 | 0.021958995 | no |
| VPS37B       | -0.09545502  | -2.531644987 | 0.011571515 | 0.021959161 | no |
| IL20         | 0.09541477   | 2.530567663  | 0.011606781 | 0.022024016 | no |
| PADI2        | 0.095407398  | 2.530370341  | 0.01161325  | 0.022034224 | no |
| CKS2         | 0.095400531  | 2.530186555  | 0.011619279 | 0.022043593 | no |
| HOXC6        | 0.095391956  | 2.52995704   | 0.011626811 | 0.022055814 | no |

|           |              |              |             |             |    |
|-----------|--------------|--------------|-------------|-------------|----|
| TMEM229B  | 0.095390061  | 2.529906331  | 0.011628476 | 0.022056903 | no |
| USP25     | 0.095360443  | 2.529113601  | 0.011654529 | 0.022104247 | no |
| CDC27     | 0.095356484  | 2.529007633  | 0.011658016 | 0.022108786 | no |
| GATM      | 0.095304961  | 2.527628617  | 0.011703474 | 0.022192912 | no |
| FAM19A3   | 0.095299343  | 2.527478274  | 0.011708439 | 0.022200246 | no |
| NT5DC3    | -0.095289095 | -2.527203988 | 0.011717503 | 0.022215348 | no |
| CCT8      | 0.095275532  | 2.526840982  | 0.011729508 | 0.022236023 | no |
| ADAMTSL2  | -0.095272638 | -2.526763516 | 0.011732071 | 0.022238797 | no |
| ZNF766    | 0.095271358  | 2.526729262  | 0.011733205 | 0.022238861 | no |
| RBM12B    | -0.095268536 | -2.526653723 | 0.011735705 | 0.022241515 | no |
| EXOSC5    | -0.095259056 | -2.526399998 | 0.011744106 | 0.022255351 | no |
| SCAMP4    | 0.095251282  | 2.526191944  | 0.011750999 | 0.022266327 | no |
| LCE1D     | -0.095227814 | -2.525563833 | 0.011771831 | 0.02230371  | no |
| ARL9      | 0.095203308  | 2.524907968  | 0.011793619 | 0.022342896 | no |
| MGAM      | 0.095194962  | 2.524684594  | 0.011801048 | 0.022354875 | no |
| ERC2      | -0.095178317 | -2.524239121 | 0.011815875 | 0.022380865 | no |
| CTNBL1    | -0.095169679 | -2.52400792  | 0.011823577 | 0.022392348 | no |
| MTFMT     | 0.095169033  | 2.523990651  | 0.011824152 | 0.022392348 | no |
| TCP1      | -0.095149918 | -2.523479047 | 0.011841211 | 0.022422554 | no |
| ZFP92     | -0.095126971 | -2.522864928 | 0.011861718 | 0.022459282 | no |
| RSL24D1   | -0.095090994 | -2.521902078 | 0.011893933 | 0.02251817  | no |
| CLDN1     | 0.095085927  | 2.521766462  | 0.011898476 | 0.022524663 | no |
| NPY5R     | 0.095081369  | 2.52164447   | 0.011902565 | 0.022530293 | no |
| TCERG1L   | -0.095079307 | -2.521589286 | 0.011904415 | 0.022531685 | no |
| LOC550112 | 0.095074307  | 2.521455474  | 0.011908902 | 0.022538067 | no |
| DPCR1     | 0.095020469  | 2.520014639  | 0.011957308 | 0.02262756  | no |
| CHURC1    | 0.095008434  | 2.519692538  | 0.011968153 | 0.022645964 | no |
| SDSL      | 0.094990339  | 2.519208283  | 0.011984475 | 0.022674725 | no |
| DLD       | 0.094988474  | 2.519158363  | 0.011986158 | 0.022675788 | no |
| UCN3      | -0.094947365 | -2.518058199 | 0.012023317 | 0.022743957 | no |
| DEFB1     | 0.094942962  | 2.517940371  | 0.012027302 | 0.022749368 | no |
| TOPBP1    | -0.094933058 | -2.517675339 | 0.012036272 | 0.022764204 | no |
| SGOL2     | 0.094928652  | 2.517557419  | 0.012040264 | 0.022769625 | no |
| HNRNPUL1  | -0.094924076 | -2.517434967 | 0.012044412 | 0.022775338 | no |
| ZNF718    | -0.094861477 | -2.515759727 | 0.012101278 | 0.022879104 | no |
| OR1F2P    | -0.094861179 | -2.51575174  | 0.01210155  | 0.022879104 | no |
| BARHL1    | -0.094858543 | -2.515681213 | 0.012103949 | 0.022881501 | no |
| IL1F5     | 0.094844308  | 2.515300265  | 0.012116917 | 0.022903872 | no |
| C14orf48  | 0.094816592  | 2.514558559  | 0.012142199 | 0.022949517 | no |
| PPPDE1    | 0.094809819  | 2.514377296  | 0.012148385 | 0.022959062 | no |
| VPS35     | 0.094804491  | 2.514234717  | 0.012153253 | 0.022966115 | no |
| INMT      | 0.094802055  | 2.514169542  | 0.012155478 | 0.022966197 | no |
| C11orf65  | -0.094801957 | -2.514166906 | 0.012155568 | 0.022966197 | no |
| MIA       | 0.094791394  | 2.513884227  | 0.012165226 | 0.022982296 | no |
| LOC148696 | 0.094767865  | 2.513254583  | 0.012186761 | 0.02302083  | no |
| HNRNPUL   | -0.094763334 | -2.513133339 | 0.012190912 | 0.023026519 | no |
| SEC62     | -0.094721122 | -2.512003744 | 0.012229644 | 0.023097519 | no |
| SLC24A4   | -0.094717418 | -2.511904608 | 0.012233048 | 0.023101791 | no |
| GTPBP10   | 0.094715315  | 2.511848334  | 0.012234981 | 0.023103283 | no |
| IMPG1     | -0.094699674 | -2.511429795 | 0.012249366 | 0.023128285 | no |
| EIF3J     | -0.094687493 | -2.511103817 | 0.012260579 | 0.023147296 | no |

|            |              |              |             |             |    |
|------------|--------------|--------------|-------------|-------------|----|
| PPP1R14C   | -0.094677728 | -2.510842515 | 0.012269575 | 0.023162116 | no |
| ZNF642     | -0.094670729 | -2.510655227 | 0.012276026 | 0.02317213  | no |
| NCRNA00235 | -0.09466887  | -2.510605467 | 0.01227774  | 0.023173203 | no |
| C9orf82    | 0.094647931  | 2.510045163  | 0.01229706  | 0.0232075   | no |
| LDHAL6A    | -0.09464654  | -2.51000794  | 0.012298344 | 0.023207758 | no |
| CCL15      | 0.094635886  | 2.509722847  | 0.012308185 | 0.023224162 | no |
| TAS2R10    | -0.094633334 | -2.509654548 | 0.012310544 | 0.023226445 | no |
| PLK2       | 0.09461746   | 2.509229757  | 0.012325224 | 0.023251971 | no |
| STRADA     | -0.094610226 | -2.50903618  | 0.012331918 | 0.023262429 | no |
| HOXB6      | 0.094585187  | 2.508366165  | 0.012355114 | 0.023302441 | no |
| TMEM216    | 0.094584842  | 2.508356926  | 0.012355434 | 0.023302441 | no |
| EMID2      | -0.094567592 | -2.507895334 | 0.012371438 | 0.023330447 | no |
| RAB4B      | 0.094561783  | 2.507739892  | 0.012376831 | 0.023338441 | no |
| C7orf47    | 0.094558149  | 2.507642674  | 0.012380205 | 0.023342627 | no |
| TOB2       | -0.094555247 | -2.50756501  | 0.012382901 | 0.023344627 | no |
| MTMR9L     | -0.094554522 | -2.507545598 | 0.012383575 | 0.023344627 | no |
| CST1       | 0.094552147  | 2.507482044  | 0.012385782 | 0.02334661  | no |
| P2RX7      | -0.094522036 | -2.506676326 | 0.012413789 | 0.023397221 | no |
| TANC1      | 0.094519051  | 2.506596463  | 0.012416568 | 0.023400278 | no |
| MRPL39     | 0.094514537  | 2.506475657  | 0.012420773 | 0.02340602  | no |
| LCN15      | -0.094512214 | -2.506413495 | 0.012422937 | 0.023407917 | no |
| RNF8       | -0.09451006  | -2.506355871 | 0.012424944 | 0.023409516 | no |
| LOC400657  | -0.094492866 | -2.505895773 | 0.012440975 | 0.023437536 | no |
| FAM74A4    | 0.094484727  | 2.505678     | 0.012448569 | 0.023449658 | no |
| RPL19      | -0.094474423 | -2.505402289 | 0.01245819  | 0.023465594 | no |
| C16orf75   | 0.0944631    | 2.505099304  | 0.01246877  | 0.023483334 | no |
| INO80      | -0.094443992 | -2.504588005 | 0.012486642 | 0.023514803 | no |
| LY6H       | -0.094441927 | -2.504532747 | 0.012488575 | 0.023516253 | no |
| C15orf57   | 0.094437861  | 2.504423955  | 0.012492381 | 0.023521229 | no |
| SNRPG      | 0.094432832  | 2.504289388  | 0.01249709  | 0.023527905 | no |
| RTN4RL1    | -0.094425454 | -2.504091962 | 0.012504002 | 0.023538726 | no |
| LOC151162  | 0.094423131  | 2.504029797  | 0.01250618  | 0.023540633 | no |
| RET        | -0.09440872  | -2.503644202 | 0.012519692 | 0.023563873 | no |
| C16orf48   | -0.09439939  | -2.503394545 | 0.012528447 | 0.023576113 | no |
| FXR1       | -0.094399305 | -2.503392268 | 0.012528527 | 0.023576113 | no |
| TSC22D2    | 0.094387481  | 2.503075895  | 0.01253963  | 0.02359481  | no |
| C4orf22    | 0.094385458  | 2.503021758  | 0.01254153  | 0.02359619  | no |
| SGCG       | -0.094374575 | -2.502730554 | 0.012551759 | 0.023613238 | no |
| JOSD1      | 0.09436521   | 2.502479978  | 0.012560567 | 0.023627609 | no |
| EIF3E      | -0.094353334 | -2.502162199 | 0.012571744 | 0.023646434 | no |
| KIAA1468   | -0.094348996 | -2.502046138 | 0.012575829 | 0.023651917 | no |
| C4orf52    | 0.09434622   | 2.50197187   | 0.012578443 | 0.023654633 | no |
| SLC38A6    | 0.09434108   | 2.501834323  | 0.012583286 | 0.02366154  | no |
| CRHBP      | -0.094337424 | -2.501736511 | 0.012586731 | 0.023665817 | no |
| RASA1      | 0.094316003  | 2.501163331  | 0.012606936 | 0.023701602 | no |
| CMTM2      | 0.094296469  | 2.500640663  | 0.012625385 | 0.023734081 | no |
| CCDC78     | -0.094283305 | -2.500288454 | 0.012637831 | 0.023755268 | no |
| GRINL1A    | -0.094250484 | -2.499410255 | 0.012668911 | 0.023811475 | no |
| SPTBN5     | 0.09424698   | 2.49931651   | 0.012672233 | 0.023815504 | no |
| CCDC136    | -0.094238947 | -2.499101565 | 0.012679852 | 0.023825539 | no |
| POLR2E     | -0.094238865 | -2.499099394 | 0.012679929 | 0.023825539 | no |

|              |              |              |             |             |    |
|--------------|--------------|--------------|-------------|-------------|----|
| STX19        | -0.094206764 | -2.498240481 | 0.012710415 | 0.023880603 | no |
| GPATCH3      | -0.094198456 | -2.498018176 | 0.012718316 | 0.023891821 | no |
| NLRP7        | 0.094198     | 2.498005993  | 0.012718749 | 0.023891821 | no |
| SORBS3       | -0.094110071 | -2.495653389 | 0.012802635 | 0.024047164 | no |
| USP29        | 0.094107493  | 2.495584396  | 0.012805102 | 0.024049564 | no |
| UPF0639      | -0.094095408 | -2.495261073 | 0.012816671 | 0.024069056 | no |
| ARMC8        | -0.094079478 | -2.494834861 | 0.012831936 | 0.024095484 | no |
| CELA3B       | 0.09407747   | 2.494781123  | 0.012833861 | 0.024096334 | no |
| MLF1IP       | 0.09407652   | 2.494755711  | 0.012834772 | 0.024096334 | no |
| ODF2         | 0.09407193   | 2.49463292   | 0.012839174 | 0.02410236  | no |
| PLCD3        | -0.094062019 | -2.494367729 | 0.012848684 | 0.024117974 | no |
| ARHGDI1A     | 0.094055114  | 2.494182991  | 0.012855313 | 0.024128177 | no |
| SILV         | 0.094049428  | 2.494030879  | 0.012860774 | 0.024136185 | no |
| ZW10         | 0.094039991  | 2.49377839   | 0.012869842 | 0.024150962 | no |
| LRCH4        | 0.094025011  | 2.493377591  | 0.012884249 | 0.024175753 | no |
| PPOX         | -0.09402112  | -2.493273503 | 0.012887992 | 0.024180533 | no |
| C19orf54     | 0.093989533  | 2.492428394  | 0.012918424 | 0.024235381 | no |
| FAM46C       | 0.093976007  | 2.492066517  | 0.012931475 | 0.024257613 | no |
| CDK12        | 0.093971785  | 2.491953567  | 0.012935551 | 0.024263008 | no |
| TSHR         | -0.093954101 | -2.49148044  | 0.012952635 | 0.024291868 | no |
| ZNF444       | -0.093953372 | -2.491460941 | 0.01295334  | 0.024291868 | no |
| IZUMO1       | -0.093943456 | -2.491195624 | 0.01296293  | 0.024307598 | no |
| FAM120B      | -0.093929762 | -2.490829259 | 0.012976183 | 0.024330192 | no |
| PDF          | 0.093923858  | 2.490671308  | 0.0129819   | 0.024338655 | no |
| LOC100132288 | -0.093919599 | -2.490557367 | 0.012986026 | 0.024344133 | no |
| MARVELD2     | 0.093913581  | 2.490396352  | 0.012991858 | 0.024352808 | no |
| RNF207       | -0.093909535 | -2.490288101 | 0.01299578  | 0.024355742 | no |
| DUSP5P       | -0.093909481 | -2.490286656 | 0.012995833 | 0.024355742 | no |
| ACYP1        | -0.093907066 | -2.490222049 | 0.012998174 | 0.024357873 | no |
| NARF         | -0.093897115 | -2.489955836 | 0.013007826 | 0.024373701 | no |
| ZNF488       | -0.093890146 | -2.48976938  | 0.01301459  | 0.024384115 | no |
| SNAPC5       | 0.093886974  | 2.489684512  | 0.01301767  | 0.024387625 | no |
| PCBP2        | -0.093878955 | -2.489469981 | 0.013025458 | 0.024399954 | no |
| SEC61G       | 0.093849313  | 2.488676957  | 0.013054282 | 0.024451684 | no |
| PPM1N        | 0.09380151   | 2.487398059  | 0.013100886 | 0.024536703 | no |
| TCTE3        | -0.093789978 | -2.487089543 | 0.013112151 | 0.024555526 | no |
| ATP6V1G1     | 0.093761769  | 2.486334888  | 0.013139741 | 0.024604916 | no |
| NUP210       | 0.093752712  | 2.486092574  | 0.013148611 | 0.024619245 | no |
| PPAN-P2RY11  | -0.093743724 | -2.485852118 | 0.013157418 | 0.024633454 | no |
| PHF20        | -0.093731688 | -2.485530143 | 0.013169219 | 0.024652117 | no |
| TMEM232      | 0.093731071  | 2.48551363   | 0.013169824 | 0.024652117 | no |
| MSI2         | -0.093725909 | -2.485375526 | 0.013174889 | 0.024659314 | no |
| LRAT         | 0.093704543  | 2.484803925  | 0.013195871 | 0.024696299 | no |
| NAT8L        | -0.093664455 | -2.483731501 | 0.013235316 | 0.024767828 | no |
| GFRA4        | -0.093659458 | -2.483597821 | 0.01324024  | 0.02477475  | no |
| ALDOB        | -0.093647877 | -2.483288003 | 0.013251659 | 0.024793822 | no |
| EP300        | -0.093633381 | -2.482900194 | 0.013265964 | 0.02481829  | no |
| OSBP         | -0.093613788 | -2.482376065 | 0.01328532  | 0.024852202 | no |
| GALNTL5      | -0.093582236 | -2.481532002 | 0.013316543 | 0.024908305 | no |
| CUL2         | -0.093575512 | -2.481352114 | 0.013323206 | 0.024918462 | no |
| CD200R1L     | 0.093493554  | 2.479159659  | 0.013404648 | 0.025068465 | no |

|              |              |              |             |             |    |
|--------------|--------------|--------------|-------------|-------------|----|
| NOP56        | -0.093479026 | -2.478771033 | 0.01341913  | 0.025093227 | no |
| ALKBH5       | 0.093457594  | 2.478197702  | 0.01344052  | 0.025130902 | no |
| RECQL5       | -0.093451358 | -2.478030885 | 0.01344675  | 0.025140225 | no |
| GGT3P        | -0.093449973 | -2.477993844 | 0.013448133 | 0.025140486 | no |
| VPS36        | -0.09344641  | -2.477898538 | 0.013451694 | 0.025144818 | no |
| POP5         | 0.093435302  | 2.477601387  | 0.0134628   | 0.025163252 | no |
| ORM2         | 0.093433508  | 2.477553397  | 0.013464595 | 0.02516428  | no |
| PER1         | -0.093431436 | -2.477497969 | 0.013466668 | 0.025165827 | no |
| FAM9B        | 0.093423103  | 2.477275054  | 0.013475007 | 0.025179084 | no |
| ASB2         | 0.093407356  | 2.476853839  | 0.013490777 | 0.025204342 | no |
| NECAB1       | -0.093407117 | -2.476847424 | 0.013491017 | 0.025204342 | no |
| DDX4         | -0.093405809 | -2.47681244  | 0.013492328 | 0.025204461 | no |
| PROM1        | 0.093384428  | 2.476240489  | 0.01351377  | 0.025242183 | no |
| CPA2         | 0.093374248  | 2.475968186  | 0.013523988 | 0.025258938 | no |
| NKX1-2       | -0.093365964 | -2.475746605 | 0.013532309 | 0.025272143 | no |
| CENPI        | 0.09333436   | 2.474901187  | 0.013564097 | 0.025329168 | no |
| TMEM31       | -0.093332806 | -2.474859624 | 0.013565661 | 0.02532975  | no |
| GGA3         | -0.093322429 | -2.474582057 | 0.013576113 | 0.025346925 | no |
| ZBTB49       | -0.093300565 | -2.473997198 | 0.01359816  | 0.025385743 | no |
| CETP         | 0.093290099  | 2.473717256  | 0.013608724 | 0.025403118 | no |
| PLSCR4       | 0.093271019  | 2.473206859  | 0.013628002 | 0.025436757 | no |
| MBIP         | -0.093269539 | -2.473167292 | 0.013629498 | 0.0254372   | no |
| SPEF1        | 0.093245266  | 2.472518008  | 0.01365406  | 0.025480689 | no |
| RBBP8        | 0.093232418  | 2.472174338  | 0.013667077 | 0.025502627 | no |
| CDK3         | -0.093224495 | -2.471962398 | 0.01367511  | 0.025515261 | no |
| PSD3         | -0.093196193 | -2.471205357 | 0.013703837 | 0.025566502 | no |
| ATP13A2      | -0.093186276 | -2.470940115 | 0.013713915 | 0.025582943 | no |
| SNHG10       | -0.09316625  | -2.470404441 | 0.013734288 | 0.025618583 | no |
| NKX6-3       | -0.09315079  | -2.469990903 | 0.013750033 | 0.025645588 | no |
| C10orf122    | 0.093137666  | 2.469639881  | 0.013763412 | 0.025668172 | no |
| KRT10        | 0.093114987  | 2.469033249  | 0.013786559 | 0.025708969 | no |
| RANBP1       | -0.093112886 | -2.468977062 | 0.013788704 | 0.025710599 | no |
| C6orf114     | -0.093096588 | -2.468541121 | 0.013805362 | 0.025737382 | no |
| PVALB        | -0.093096341 | -2.468534514 | 0.013805614 | 0.025737382 | no |
| LOC100272217 | -0.093094611 | -2.46848823  | 0.013807384 | 0.025738308 | no |
| MFRP         | -0.093079927 | -2.468095481 | 0.013822408 | 0.025763939 | no |
| CWH43        | 0.093071484  | 2.467869654  | 0.013831054 | 0.025777677 | no |
| C6           | 0.093016399  | 2.466396269  | 0.013887577 | 0.025880638 | no |
| DNHD1        | -0.093014713 | -2.46635118  | 0.01388931  | 0.025881482 | no |
| XYLT2        | 0.093008075  | 2.466173637  | 0.013896136 | 0.025891814 | no |
| KCNH1        | -0.093005707 | -2.466110281 | 0.013898572 | 0.025893968 | no |
| BTNL3        | 0.09298905   | 2.465664757  | 0.013915716 | 0.025923519 | no |
| CEP192       | -0.092929601 | -2.464074704 | 0.013977055 | 0.026035387 | no |
| EPCAM        | -0.092894547 | -2.463137127 | 0.014013335 | 0.026100563 | no |
| KRTAP5-2     | -0.092885495 | -2.462895027 | 0.014022717 | 0.026115631 | no |
| EDN3         | 0.092849266  | 2.461926056  | 0.014060322 | 0.026183253 | no |
| AMY2B        | -0.092846464 | -2.461851119 | 0.014063234 | 0.026186264 | no |
| C11orf87     | -0.092837959 | -2.461623625 | 0.014072077 | 0.026200318 | no |
| CFL1         | 0.092775342  | 2.459948904  | 0.01413733  | 0.026319386 | no |
| C15orf63     | -0.09276239  | -2.459602493 | 0.01415086  | 0.02634122  | no |
| FLT4         | 0.092761621  | 2.459581939  | 0.014151664 | 0.02634122  | no |

|              |              |              |             |             |    |
|--------------|--------------|--------------|-------------|-------------|----|
| BLVRA        | 0.09268043   | 2.457410476  | 0.014236746 | 0.026497149 | no |
| SMYD4        | 0.092674596  | 2.457254472  | 0.014242876 | 0.026506117 | no |
| ILDR2        | -0.092662803 | -2.456939056 | 0.014255276 | 0.026526754 | no |
| CYP4F3       | 0.092658779  | 2.456831454  | 0.014259509 | 0.026532188 | no |
| SFRS6        | -0.092614934 | -2.455658831 | 0.014305708 | 0.026615699 | no |
| WHAMM        | 0.092608318  | 2.4554819    | 0.01431269  | 0.026626239 | no |
| CHN1         | -0.092604701 | -2.455385155 | 0.014316509 | 0.026630893 | no |
| ACTBL2       | 0.092560197  | 2.454194958  | 0.014363567 | 0.026715168 | no |
| GDF10        | -0.092559356 | -2.454172478 | 0.014364457 | 0.026715168 | no |
| C13orf30     | 0.092533643  | 2.453484795  | 0.01439171  | 0.026763391 | no |
| CNIH         | 0.092520982  | 2.453146196  | 0.014405145 | 0.026785913 | no |
| PSMB5        | -0.092511784 | -2.452900232 | 0.014414912 | 0.026801609 | no |
| CCAR1        | -0.092509283 | -2.452833328 | 0.01441757  | 0.026802315 | no |
| OR1J4        | 0.092508931  | 2.452823936  | 0.014417943 | 0.026802315 | no |
| AADACL3      | 0.092503332  | 2.452674182  | 0.014423893 | 0.026810441 | no |
| MAMDC4       | -0.092502322 | -2.452647172 | 0.014424967 | 0.026810441 | no |
| HOXB5        | 0.092489751  | 2.452310986  | 0.014438334 | 0.026832819 | no |
| PF4          | 0.092484319  | 2.452165734  | 0.014444113 | 0.026841091 | no |
| FAM166B      | 0.092465943  | 2.451674294  | 0.014463679 | 0.026874981 | no |
| ZNF468       | 0.092461163  | 2.45154647   | 0.014468773 | 0.026881974 | no |
| PRINS        | 0.09240377   | 2.450011611  | 0.014530053 | 0.026993349 | no |
| KLF16        | 0.092402404  | 2.449975094  | 0.014531514 | 0.026993582 | no |
| GLP2R        | -0.092386642 | -2.44955357  | 0.014548385 | 0.027022439 | no |
| GRHL1        | -0.092368269 | -2.449062237 | 0.014568072 | 0.027056521 | no |
| SLC35F2      | 0.09235784   | 2.448783342  | 0.014579258 | 0.027074808 | no |
| F2RL3        | 0.092350491  | 2.448586813  | 0.014587144 | 0.027086966 | no |
| C11orf73     | -0.092331266 | -2.448072698 | 0.014607793 | 0.027121643 | no |
| LOC100188947 | -0.092330607 | -2.448055065 | 0.014608502 | 0.027121643 | no |
| GHRH         | -0.092327611 | -2.447974955 | 0.014611722 | 0.027125131 | no |
| C14orf104    | -0.092321796 | -2.447819443 | 0.014617975 | 0.027134247 | no |
| OR2L2        | -0.092319874 | -2.447768043 | 0.014620042 | 0.027135592 | no |
| C15orf24     | 0.09231757   | 2.447706424  | 0.01462252  | 0.027137701 | no |
| BOD1         | 0.092295182  | 2.447107743  | 0.01464662  | 0.027179932 | no |
| ITIH1        | 0.09224641   | 2.445803497  | 0.014699243 | 0.027275083 | no |
| RAB40A       | -0.092226952 | -2.445283156 | 0.014720284 | 0.027311619 | no |
| PRAMEF9      | 0.092204019  | 2.444669908  | 0.014745116 | 0.027355181 | no |
| SGTB         | -0.092193146 | -2.444379165 | 0.014756902 | 0.027374535 | no |
| ZGPAT        | -0.09218657  | -2.444203302 | 0.014764035 | 0.027385254 | no |
| SP4          | -0.092177314 | -2.443955801 | 0.014774079 | 0.02740137  | no |
| CPA1         | 0.092142096  | 2.44301403   | 0.014812353 | 0.027469835 | no |
| C8orf58      | 0.092140708  | 2.442976937  | 0.014813862 | 0.027470115 | no |
| CCNT2        | -0.092137815 | -2.442899569 | 0.01481701  | 0.027473433 | no |
| FXVD2        | -0.092135076 | -2.44282632  | 0.014819992 | 0.027476441 | no |
| TTC28        | -0.092129837 | -2.442686218 | 0.014825695 | 0.027484495 | no |
| CES2         | -0.092090948 | -2.441646312 | 0.014868092 | 0.027560565 | no |
| NPB          | 0.092070186  | 2.441091142  | 0.01489077  | 0.027600073 | no |
| SRRM4        | -0.092058977 | -2.440791425 | 0.014903026 | 0.027620256 | no |
| MFAP5        | 0.092048579  | 2.440513363  | 0.014914404 | 0.027638811 | no |
| ESR2         | 0.092046332  | 2.440453285  | 0.014916864 | 0.027640835 | no |
| OR13J1       | -0.092026815 | -2.439931407 | 0.014938242 | 0.027677913 | no |
| FAM74A3      | 0.092006957  | 2.439400405  | 0.014960023 | 0.027715728 | no |

|              |              |              |             |             |    |
|--------------|--------------|--------------|-------------|-------------|----|
| TRIM52       | -0.091990977 | -2.438973117 | 0.01497757  | 0.027745694 | no |
| GPR6         | -0.091964848 | -2.438274455 | 0.0150063   | 0.027796369 | no |
| DDX31        | -0.091958932 | -2.438116259 | 0.015012812 | 0.027805884 | no |
| SULT1C4      | -0.091944449 | -2.437728983 | 0.015028764 | 0.02783288  | no |
| ISCA1        | -0.09192209  | -2.437131146 | 0.015053419 | 0.027875987 | no |
| ZNF582       | 0.0918924    | 2.436337258  | 0.015086214 | 0.027934159 | no |
| DAD1         | 0.091887977  | 2.43621898   | 0.015091106 | 0.027940657 | no |
| WFDC10B      | 0.091881402  | 2.436043188  | 0.015098378 | 0.027951563 | no |
| GAL          | 0.091872986  | 2.435818147  | 0.015107693 | 0.027966246 | no |
| KIAA1012     | 0.091852293  | 2.435264855  | 0.015130615 | 0.028006114 | no |
| ZNF643       | -0.091821495 | -2.434441372 | 0.015164788 | 0.028066797 | no |
| TFIP11       | -0.09181349  | -2.434227328 | 0.015173682 | 0.028080687 | no |
| ZNF259       | 0.091812026  | 2.434188183  | 0.015175309 | 0.028081127 | no |
| IPO5         | -0.091801461 | -2.433905682 | 0.015187055 | 0.02809512  | no |
| TRIP13       | 0.091801284  | 2.433900966  | 0.015187251 | 0.02809512  | no |
| THYN1        | -0.091800673 | -2.433884639 | 0.01518793  | 0.02809512  | no |
| CDK19        | -0.091800225 | -2.433872653 | 0.015188429 | 0.02809512  | no |
| UBE2V2       | -0.09178861  | -2.433562077 | 0.015201353 | 0.028116453 | no |
| LOC100101266 | -0.091774836 | -2.433193801 | 0.01521669  | 0.028142247 | no |
| POLR2D       | 0.091747276  | 2.432456907  | 0.01524742  | 0.028196501 | no |
| GSDMB        | -0.091737699 | -2.432200852 | 0.015258111 | 0.02821369  | no |
| FLVCR1       | -0.091718397 | -2.431684743 | 0.01527968  | 0.028250989 | no |
| PMCHL2       | -0.091714089 | -2.431569578 | 0.015284496 | 0.028257311 | no |
| SP7          | -0.091710357 | -2.43146979  | 0.015288671 | 0.028262444 | no |
| CDKN1A       | 0.091669508  | 2.430377605  | 0.015334427 | 0.028344436 | no |
| C10orf62     | -0.091668068 | -2.430339086 | 0.015336043 | 0.028344832 | no |
| ZXDA         | -0.091662242 | -2.430183324 | 0.015342579 | 0.02835432  | no |
| ZKSCAN4      | 0.091651468  | 2.429895258  | 0.015354673 | 0.028374077 | no |
| UXT          | 0.091642774  | 2.42966282   | 0.015364438 | 0.028389527 | no |
| GGTLC2       | -0.091630676 | -2.429339351 | 0.015378036 | 0.028412056 | no |
| BAT5         | 0.091615947  | 2.428945529  | 0.015394606 | 0.028440071 | no |
| SPACA5       | -0.091602657 | -2.428590223 | 0.015409568 | 0.028465112 | no |
| ZNF678       | -0.091593034 | -2.428332917 | 0.015420412 | 0.028482541 | no |
| CCDC144B     | -0.091585001 | -2.428118144 | 0.015429469 | 0.028496666 | no |
| VIL1         | 0.091538749  | 2.426881551  | 0.015481704 | 0.028590528 | no |
| ATP5G2       | -0.091537423 | -2.426846085 | 0.015483205 | 0.028590687 | no |
| ORC2L        | 0.091510217  | 2.426118702  | 0.015514006 | 0.028644947 | no |
| JAGN1        | 0.09150031   | 2.425853845  | 0.015525235 | 0.028663062 | no |
| DFFA         | 0.091498797  | 2.425813379  | 0.015526951 | 0.028663613 | no |
| DGKH         | -0.091484065 | -2.425419519 | 0.015543664 | 0.028691847 | no |
| NCRNA00173   | -0.091468813 | -2.425011757 | 0.015560983 | 0.028721194 | no |
| HS6ST3       | -0.09145073  | -2.424528291 | 0.015581541 | 0.028756512 | no |
| THEG         | -0.091420901 | -2.423730809 | 0.015615502 | 0.028816559 | no |
| PTTG1        | 0.09141249   | 2.42350592   | 0.015625091 | 0.028831622 | no |
| C21orf57     | -0.091410373 | -2.423449343 | 0.015627504 | 0.028833444 | no |
| MRPL49       | 0.091408483  | 2.423398807  | 0.01562966  | 0.02883479  | no |
| NDUFC1       | 0.09137933   | 2.422619401  | 0.015662941 | 0.028893553 | no |
| CLDN11       | 0.091372382  | 2.422433647  | 0.015670882 | 0.028903616 | no |
| DFNB59       | -0.091372056 | -2.422424924 | 0.015671255 | 0.028903616 | no |
| RPL24        | -0.091367664 | -2.422307504 | 0.015676277 | 0.02891024  | no |
| RRS1         | -0.091354444 | -2.421954063 | 0.015691401 | 0.028935493 | no |



|              |              |              |             |             |    |
|--------------|--------------|--------------|-------------|-------------|----|
| BTF3         | -0.091350889 | -2.421859027 | 0.01569547  | 0.028940357 | no |
| NOTUM        | -0.09133102  | -2.421327849 | 0.015718229 | 0.028979678 | no |
| KCTD8        | -0.091306914 | -2.420683386 | 0.015745881 | 0.029027888 | no |
| ZNF215       | 0.091305183  | 2.420637091  | 0.015747869 | 0.029027888 | no |
| FLJ22536     | -0.091304472 | -2.4206181   | 0.015748685 | 0.029027888 | no |
| TMEM45B      | -0.091277176 | -2.41988836  | 0.015780052 | 0.029083054 | no |
| PPP2R4       | 0.091271824  | 2.419745265  | 0.01578621  | 0.02909175  | no |
| GCNT7        | 0.091240431  | 2.418906006  | 0.015822366 | 0.029155723 | no |
| MAST3        | -0.091218691 | -2.418324824 | 0.015847446 | 0.029199277 | no |
| ITGB1BP2     | -0.09120496  | -2.417957754 | 0.015863305 | 0.029225834 | no |
| PURB         | -0.091176924 | -2.417208228 | 0.01589573  | 0.029282905 | no |
| TLN2         | -0.091170927 | -2.417047918 | 0.015902673 | 0.029293025 | no |
| SORT1        | 0.09116497   | 2.416888675  | 0.015909572 | 0.029303064 | no |
| F2R          | 0.091161234  | 2.416788807  | 0.015913901 | 0.029308366 | no |
| PSMB3        | 0.091153804  | 2.416590178  | 0.015922512 | 0.029321555 | no |
| ABHD12       | 0.091152532  | 2.416556152  | 0.015923988 | 0.029321601 | no |
| NMT1         | 0.091150317  | 2.416496939  | 0.015926556 | 0.029323659 | no |
| ACY3         | -0.091149001 | -2.416461759 | 0.015928082 | 0.029323799 | no |
| AOC3         | 0.091142385  | 2.416284907  | 0.015935755 | 0.029335254 | no |
| RNF222       | -0.091136995 | -2.416140807 | 0.015942009 | 0.029344095 | no |
| WNT8A        | -0.091131911 | -2.416004892 | 0.015947911 | 0.029352285 | no |
| PRKRIP1      | -0.091124449 | -2.41580542  | 0.015956575 | 0.02936274  | no |
| OPRD1        | -0.091123359 | -2.415776281 | 0.015957841 | 0.02936274  | no |
| DEK          | 0.091123267  | 2.415773823  | 0.015957948 | 0.02936274  | no |
| OTUB2        | -0.091069686 | -2.41434144  | 0.016020291 | 0.029471607 | no |
| SRP68        | -0.091068909 | -2.414320666 | 0.016021197 | 0.029471607 | no |
| CLCN5        | 0.091068445  | 2.414308278  | 0.016021737 | 0.029471607 | no |
| KIAA1217     | 0.091067409  | 2.414280571  | 0.016022945 | 0.029471607 | no |
| WDR87        | -0.091028929 | -2.413251903 | 0.016067856 | 0.029551525 | no |
| VILL         | 0.091016291  | 2.412914073  | 0.01608263  | 0.029576006 | no |
| GPRASP1      | -0.091014209 | -2.412858408 | 0.016085065 | 0.029577794 | no |
| ZNF780B      | -0.091002729 | -2.412551525 | 0.016098498 | 0.029599802 | no |
| KIAA0892     | -0.091001247 | -2.412511906 | 0.016100233 | 0.0296003   | no |
| COPS3        | 0.090996507  | 2.412385189  | 0.016105783 | 0.029607811 | no |
| LOC100130274 | -0.090958181 | -2.411360676 | 0.016150715 | 0.029687714 | no |
| PAPOLA       | 0.090943648  | 2.410972165  | 0.016167784 | 0.029716386 | no |
| LRRC61       | 0.090923078  | 2.410422303  | 0.016191967 | 0.029758131 | no |
| LMF1         | -0.09090365  | -2.409902967 | 0.016214838 | 0.029797454 | no |
| CEP63        | -0.090867819 | -2.408945149 | 0.016257093 | 0.029872389 | no |
| COLEC10      | 0.090860899  | 2.408760178  | 0.016265264 | 0.029884688 | no |
| VPS11        | -0.090858409 | -2.408693629 | 0.016268205 | 0.029887375 | no |
| GYG1         | 0.090855023  | 2.40860311   | 0.016272205 | 0.029892009 | no |
| CAPN8        | 0.090848478  | 2.408428155  | 0.016279941 | 0.029900826 | no |
| MAS1         | -0.090848459 | -2.408427644 | 0.016279963 | 0.029900826 | no |
| SEMA3G       | -0.090844521 | -2.408322377 | 0.016284619 | 0.02990666  | no |
| SKA2         | -0.090838973 | -2.408174074 | 0.01629118  | 0.029913962 | no |
| C16orf46     | -0.09083809  | -2.408150482 | 0.016292224 | 0.029913962 | no |
| ZFC3H1       | -0.090837406 | -2.408132188 | 0.016293033 | 0.029913962 | no |
| PRAP1        | -0.090835475 | -2.408080571 | 0.016295317 | 0.029915439 | no |
| NHP2         | -0.09081549  | -2.407546365 | 0.016318975 | 0.029956151 | no |
| AACSL        | -0.090803571 | -2.407227747 | 0.0163331   | 0.029979357 | no |

|              |              |              |             |             |    |
|--------------|--------------|--------------|-------------|-------------|----|
| ATPAF1       | -0.09080163  | -2.407175877 | 0.016335401 | 0.029980858 | no |
| C9orf114     | -0.090795876 | -2.40702206  | 0.016342224 | 0.029990659 | no |
| IL6ST        | 0.090783189  | 2.40668293   | 0.016357277 | 0.03001556  | no |
| FAM71D       | -0.090775404 | -2.406474828 | 0.016366521 | 0.030029795 | no |
| GUSBP1       | -0.090770339 | -2.406339438 | 0.016372537 | 0.030038108 | no |
| C10orf47     | 0.090765781  | 2.406217593  | 0.016377953 | 0.030045318 | no |
| RSPH9        | 0.09073095   | 2.405286572  | 0.016419388 | 0.030118597 | no |
| RFPL2        | -0.090724261 | -2.405107763 | 0.016427356 | 0.03013048  | no |
| F8           | 0.090715403  | 2.404870977  | 0.016437913 | 0.030147109 | no |
| ELM03        | -0.090692538 | -2.404259806 | 0.016465191 | 0.030194397 | no |
| ANKS4B       | -0.090672917 | -2.403735354 | 0.016488629 | 0.030234637 | no |
| HAPLN4       | -0.090665192 | -2.403528864 | 0.016497866 | 0.03024883  | no |
| C14orf101    | 0.090660823  | 2.403412085  | 0.016503091 | 0.030254624 | no |
| ZFP91        | -0.090660049 | -2.403391373 | 0.016504018 | 0.030254624 | no |
| LOC387647    | -0.090639358 | -2.402838325 | 0.016528787 | 0.030297282 | no |
| NIT1         | 0.090633865  | 2.402691491  | 0.016535369 | 0.030306598 | no |
| TNNT2        | -0.090622344 | -2.40238354  | 0.01654918  | 0.030329162 | no |
| PEX5L        | -0.090618915 | -2.402291884 | 0.016553292 | 0.030333949 | no |
| HCN4         | -0.090611745 | -2.40210025  | 0.016561894 | 0.03034649  | no |
| LOC100130987 | -0.090610709 | -2.402072543 | 0.016563137 | 0.03034649  | no |
| ST8SIA2      | -0.090604014 | -2.401893605 | 0.016571173 | 0.030357556 | no |
| RAB3IP       | -0.090603175 | -2.401871179 | 0.01657218  | 0.030357556 | no |
| LECT1        | 0.090553571  | 2.400545306  | 0.016631832 | 0.030464067 | no |
| FLJ45983     | 0.09051339   | 2.39947132   | 0.016680289 | 0.030550057 | no |
| ZNF224       | 0.090504149  | 2.399224334  | 0.01669145  | 0.03056773  | no |
| H2AFY        | 0.090500868  | 2.399136635  | 0.016695415 | 0.030572222 | no |
| VN1R2        | -0.090496095 | -2.399009066 | 0.016701184 | 0.030580016 | no |
| SCYL1        | -0.09046857  | -2.398273367 | 0.016734486 | 0.030638218 | no |
| NCOA2        | -0.090411756 | -2.396754821 | 0.01680341  | 0.030761621 | no |
| C21orf128    | -0.090389871 | -2.396169887 | 0.016830025 | 0.030807556 | no |
| SLC22A10     | -0.090358924 | -2.39534276  | 0.016867724 | 0.030873769 | no |
| SLC14A2      | -0.090344595 | -2.394959783 | 0.016885205 | 0.030902967 | no |
| ST6GALNAC3   | 0.090330249  | 2.394576353  | 0.016902722 | 0.030932227 | no |
| ARRB1        | -0.090317389 | -2.394232639 | 0.016918439 | 0.030958186 | no |
| GAS5         | -0.090300911 | -2.393792228 | 0.016938595 | 0.030992264 | no |
| ZNF417       | 0.090286008  | 2.393393918  | 0.016956843 | 0.031022845 | no |
| MRPS33       | 0.090272018  | 2.393019999  | 0.01697399  | 0.031047791 | no |
| ECT2         | 0.090271787  | 2.393013847  | 0.016974272 | 0.031047791 | no |
| ZNF70        | -0.090271124 | -2.392996106 | 0.016975086 | 0.031047791 | no |
| RBX1         | 0.090260712  | 2.392717835  | 0.016987857 | 0.031068339 | no |
| COL11A1      | 0.090242895  | 2.39224165   | 0.01700973  | 0.031105528 | no |
| C3orf36      | 0.090229769  | 2.391890838  | 0.01702586  | 0.03113221  | no |
| SPRY3        | -0.090220764 | -2.391650165 | 0.017036934 | 0.031149642 | no |
| MMP16        | -0.090183134 | -2.390644466 | 0.017083277 | 0.031231549 | no |
| LOC285847    | -0.090177449 | -2.390492525 | 0.017090289 | 0.031241542 | no |
| INTU         | 0.090157251  | 2.389952694  | 0.017115219 | 0.031284287 | no |
| PNPLA2       | 0.09015139   | 2.389796078  | 0.017122458 | 0.031294689 | no |
| ZNF8         | -0.090110792 | -2.388711041 | 0.017172682 | 0.031383647 | no |
| ACOT4        | 0.090107503  | 2.388623165  | 0.017176755 | 0.031388254 | no |
| METT5D1      | -0.090098886 | -2.388392856 | 0.017187435 | 0.031404931 | no |
| CTXN3        | -0.090091084 | -2.388184341 | 0.017197109 | 0.031419767 | no |

|           |              |              |             |             |    |
|-----------|--------------|--------------|-------------|-------------|----|
| TMUB1     | 0.090089384  | 2.38813891   | 0.017199217 | 0.03142078  | no |
| PCDHB2    | -0.09004385  | -2.386922007 | 0.017255776 | 0.031521257 | no |
| LOC116437 | -0.090035874 | -2.386708837 | 0.0172657   | 0.031536537 | no |
| ARHGAP11A | 0.090019024  | 2.386258524  | 0.017286682 | 0.031572009 | no |
| NCOA4     | 0.089986589  | 2.385391712  | 0.017327133 | 0.031643028 | no |
| COX4I1    | -0.089976651 | -2.385126119 | 0.017339543 | 0.031662833 | no |
| SERPINA6  | 0.089960311  | 2.384689436  | 0.017359966 | 0.031697263 | no |
| CSRP3     | 0.089954299  | 2.384528767  | 0.017367485 | 0.031708129 | no |
| KLHL26    | 0.089925435  | 2.383757412  | 0.017403625 | 0.031771241 | no |
| DENND4B   | -0.08992028  | -2.383619645 | 0.017410087 | 0.031780168 | no |
| ERBB2IP   | 0.089899204  | 2.383056403  | 0.017436526 | 0.031825557 | no |
| AGL       | 0.089896463  | 2.38298316   | 0.017439967 | 0.031828963 | no |
| RFX1      | 0.089881487  | 2.382582923  | 0.01745878  | 0.031857769 | no |
| TSPAN19   | 0.089880252  | 2.382549938  | 0.017460331 | 0.031857769 | no |
| FAM111B   | 0.089880136  | 2.382546818  | 0.017460478 | 0.031857769 | no |
| HS3ST4    | -0.089868353 | -2.382231945 | 0.017475292 | 0.031881921 | no |
| SNCA      | -0.089850216 | -2.381747241 | 0.017498117 | 0.031920683 | no |
| CDCA7L    | 0.089830337  | 2.381216004  | 0.017523164 | 0.031963491 | no |
| ZCWPW1    | -0.089824324 | -2.381055331 | 0.017530746 | 0.031974436 | no |
| TSPAN33   | 0.08981826   | 2.380893275  | 0.017538396 | 0.031985503 | no |
| PER4      | 0.089793827  | 2.380240337  | 0.017569247 | 0.032038878 | no |
| MPV17L    | 0.089791746  | 2.38018472   | 0.017571878 | 0.032040785 | no |
| STRN3     | -0.089784044 | -2.379978903 | 0.017581614 | 0.032055647 | no |
| AQP6      | -0.089782449 | -2.379936271 | 0.017583631 | 0.032056434 | no |
| CAPSL     | 0.089777416  | 2.379801784  | 0.017589996 | 0.032065146 | no |
| KLF13     | -0.089771681 | -2.379648516 | 0.017597252 | 0.032075482 | no |
| CATSPERB  | 0.089768438  | 2.379561868  | 0.017601356 | 0.03208007  | no |
| ACSM4     | 0.089766003  | 2.379496785  | 0.017604439 | 0.032080525 | no |
| MRPL42P5  | -0.089764877 | -2.379466696 | 0.017605864 | 0.032080525 | no |
| MTP18     | 0.08976448   | 2.379456101  | 0.017606366 | 0.032080525 | no |
| SYNRG     | -0.089738336 | -2.37875745  | 0.017639492 | 0.032137987 | no |
| DNAH1     | -0.089725368 | -2.378410905 | 0.017655943 | 0.032165062 | no |
| PCM1      | -0.089716119 | -2.37816375  | 0.017667684 | 0.032183552 | no |
| ME1       | 0.089692179  | 2.377524014  | 0.017698108 | 0.032236066 | no |
| C5orf51   | -0.089675458 | -2.377077181 | 0.017719384 | 0.032270053 | no |
| FOXD4L3   | -0.089675007 | -2.37706512  | 0.017719959 | 0.032270053 | no |
| C17orf78  | -0.089667172 | -2.376855748 | 0.017729936 | 0.032285315 | no |
| TTC1      | 0.089658553  | 2.376625437  | 0.017740918 | 0.032302402 | no |
| MBL2      | 0.089650595  | 2.37641279   | 0.017751062 | 0.032317962 | no |
| SHC4      | 0.089618604  | 2.3755579    | 0.017791895 | 0.032389388 | no |
| NDC80     | 0.089616739  | 2.375508059  | 0.017794279 | 0.03239081  | no |
| MMP13     | 0.089581261  | 2.374560045  | 0.017839662 | 0.032470498 | no |
| ARHGEF33  | -0.089573966 | -2.374365092 | 0.017849008 | 0.032484583 | no |
| HOKK2     | -0.089565817 | -2.374147343 | 0.017859451 | 0.032500664 | no |
| HJURP     | 0.089547436  | 2.373656176  | 0.017883027 | 0.032540639 | no |
| ARHGEF2   | -0.089527201 | -2.373115462 | 0.017909013 | 0.032584991 | no |
| LAMA3     | 0.089511221  | 2.372688467  | 0.017929557 | 0.032619435 | no |
| C7orf43   | 0.089501942  | 2.372440508  | 0.017941497 | 0.03263822  | no |
| ZNF764    | -0.089469215 | -2.371566004 | 0.017983661 | 0.032709078 | no |
| MCRS1     | -0.089468334 | -2.371542482 | 0.017984797 | 0.032709078 | no |
| C19orf6   | -0.089467943 | -2.371532029 | 0.017985301 | 0.032709078 | no |

|           |              |              |             |             |    |
|-----------|--------------|--------------|-------------|-------------|----|
| SNX12     | -0.089464832 | -2.371448889 | 0.017989315 | 0.032713375 | no |
| F5        | -0.089463603 | -2.371416048 | 0.0179909   | 0.032713375 | no |
| DYNC1LI1  | -0.089458124 | -2.371269652 | 0.01799797  | 0.032723287 | no |
| PTPRR     | -0.089450743 | -2.37107242  | 0.018007498 | 0.032737667 | no |
| CDC26     | -0.089438039 | -2.370732965 | 0.018023907 | 0.032764553 | no |
| SLC25A31  | 0.089435846  | 2.370674352  | 0.018026742 | 0.03276676  | no |
| IRS2      | 0.089420548  | 2.370265591  | 0.018046522 | 0.032799765 | no |
| UBAP2L    | -0.089414805 | -2.370112134 | 0.018053953 | 0.032810321 | no |
| PEX11A    | -0.089410182 | -2.36998861  | 0.018059936 | 0.032818244 | no |
| BCL9L     | -0.089396959 | -2.369635292 | 0.01807706  | 0.032846409 | no |
| CSRNP2    | -0.089388119 | -2.36939907  | 0.018088516 | 0.032864272 | no |
| WNT9B     | -0.089358301 | -2.368602328 | 0.018127204 | 0.032931603 | no |
| ZEB2      | -0.08935072  | -2.368399755 | 0.018137052 | 0.032946533 | no |
| RNF183    | -0.089345422 | -2.368258208 | 0.018143936 | 0.032956077 | no |
| KLHL34    | -0.089340287 | -2.36812098  | 0.018150612 | 0.032965242 | no |
| AKAP10    | 0.089307949  | 2.367256914  | 0.018192699 | 0.033038712 | no |
| CHRNA     | -0.089303111 | -2.36712766  | 0.018199002 | 0.03304719  | no |
| HTR3B     | -0.089300103 | -2.367047278 | 0.018202922 | 0.033051341 | no |
| ZNF148    | -0.089294976 | -2.366910279 | 0.018209607 | 0.033060509 | no |
| FAM72D    | 0.089291565  | 2.36681914   | 0.018214054 | 0.033065615 | no |
| POLD1     | 0.089271723  | 2.366288989  | 0.018239946 | 0.033109645 | no |
| PDDC1     | -0.08926488  | -2.366106135 | 0.018248883 | 0.033122895 | no |
| SRPK1     | -0.089258866 | -2.365945437 | 0.018256741 | 0.033134183 | no |
| GTF2H4    | -0.089251632 | -2.365752156 | 0.018266196 | 0.033148367 | no |
| LOC153684 | 0.089231757  | 2.365221122  | 0.018292196 | 0.033192571 | no |
| C1orf198  | -0.089219553 | -2.364895018 | 0.018308178 | 0.03321859  | no |
| PLCL2     | -0.089207837 | -2.364581984 | 0.018323532 | 0.033243464 | no |
| TM9SF4    | 0.089196124  | 2.364269039  | 0.018338892 | 0.033268346 | no |
| TSG101    | -0.089183196 | -2.363923616 | 0.018355859 | 0.033296139 | no |
| MCART6    | -0.089176103 | -2.363734094 | 0.018365175 | 0.0333084   | no |
| POLG2     | -0.089175541 | -2.363719062 | 0.018365914 | 0.0333084   | no |
| SEC24B    | 0.089152162  | 2.363094413  | 0.018396647 | 0.033361145 | no |
| PMS2L1    | 0.089150735  | 2.363056295  | 0.018398523 | 0.033361556 | no |
| SP6       | 0.089148144  | 2.362987057  | 0.018401933 | 0.033364746 | no |
| C14orf176 | -0.089143356 | -2.362859144 | 0.018408234 | 0.033373177 | no |
| CCR9      | 0.089136827  | 2.362684693  | 0.018416829 | 0.033384583 | no |
| RABAC1    | 0.089136069  | 2.362664444  | 0.018417827 | 0.033384583 | no |
| C1orf104  | -0.089128168 | -2.362453337 | 0.018428235 | 0.033400452 | no |
| RBM19     | -0.089081116 | -2.36119617  | 0.018490318 | 0.033509214 | no |
| RAB5C     | 0.089080178  | 2.361171108  | 0.018491557 | 0.033509214 | no |
| VOPPI     | 0.089066123  | 2.36079559   | 0.018510138 | 0.033539879 | no |
| LRDD      | -0.089046634 | -2.360274891 | 0.01853593  | 0.033583604 | no |
| ZBTB34    | 0.089043706  | 2.360196649  | 0.018539808 | 0.03358762  | no |
| ALOX15    | 0.089042326  | 2.360159791  | 0.018541635 | 0.033587921 | no |
| FAF1      | 0.089020093  | 2.359565771  | 0.018571105 | 0.033638292 | no |
| SLC9A10   | 0.089016703  | 2.359475194  | 0.018575603 | 0.033643423 | no |
| GLRA4     | -0.089005758 | -2.35918277  | 0.018590128 | 0.033666716 | no |
| ANXA6     | -0.088994203 | -2.358874044 | 0.018605475 | 0.03369149  | no |
| KRT33A    | -0.088972077 | -2.358282903 | 0.01863489  | 0.033741735 | no |
| SNTN      | 0.088970442  | 2.358239222  | 0.018637065 | 0.033742651 | no |
| KIFAP3    | -0.088936507 | -2.357332564 | 0.018682265 | 0.033821457 | no |

|           |              |              |             |             |    |
|-----------|--------------|--------------|-------------|-------------|----|
| C17orf108 | -0.088930908 | -2.357182983 | 0.018689732 | 0.033831945 | no |
| SLC35C2   | 0.088921692  | 2.356936749  | 0.018702028 | 0.033851173 | no |
| ZNF516    | -0.08890332  | -2.356445904 | 0.018726561 | 0.033892544 | no |
| SERPIND1  | 0.088895249  | 2.35623028   | 0.018737347 | 0.03390903  | no |
| C9orf78   | -0.088888549 | -2.356051285 | 0.018746305 | 0.033922205 | no |
| CHMP1B    | 0.088885181  | 2.355961293  | 0.01875081  | 0.033925129 | no |
| ATP5D     | -0.088884832 | -2.355951962 | 0.018751277 | 0.033925129 | no |
| RXRG      | -0.088833154 | -2.354571307 | 0.018820515 | 0.034047349 | no |
| EFHA1     | -0.088786193 | -2.353316697 | 0.018883626 | 0.034158465 | no |
| HMGB2     | 0.088772241  | 2.352943956  | 0.018902412 | 0.034189387 | no |
| STL       | -0.088765417 | -2.352761647 | 0.018911607 | 0.034202957 | no |
| HOXD10    | 0.088760044  | 2.352618086  | 0.018918849 | 0.034212996 | no |
| PRSS42    | 0.0887537    | 2.352448623  | 0.018927402 | 0.034225402 | no |
| BCL6      | -0.088733213 | -2.351901278 | 0.01895505  | 0.03427233  | no |
| ADORA1    | 0.088715941  | 2.351439859  | 0.018978384 | 0.034311453 | no |
| ASB15     | 0.088711948  | 2.351333172  | 0.018983783 | 0.034318145 | no |
| ZNF350    | 0.088709725  | 2.351273785  | 0.018986789 | 0.034320192 | no |
| IL5RA     | 0.088708363  | 2.351237405  | 0.018988631 | 0.034320192 | no |
| MT1M      | 0.088707344  | 2.351210191  | 0.018990008 | 0.034320192 | no |
| C16orf90  | -0.088694477 | -2.350866428 | 0.019007419 | 0.034348587 | no |
| ZNF18     | 0.08868988   | 2.350743621  | 0.019013642 | 0.034356762 | no |
| CHRNA5    | 0.088667236  | 2.350138688  | 0.019044322 | 0.034409125 | no |
| ETS1      | 0.088661922  | 2.349996713  | 0.019051529 | 0.03441907  | no |
| CYP4Z1    | -0.088648285 | -2.349632409 | 0.019070032 | 0.034449421 | no |
| JRKL      | -0.088636427 | -2.349315613 | 0.019086136 | 0.03447543  | no |
| C7orf68   | 0.088628946  | 2.349115761  | 0.019096301 | 0.03449071  | no |
| PGAM1     | -0.088620611 | -2.348893094 | 0.019107632 | 0.034508092 | no |
| DAAM1     | 0.088595827  | 2.348230999  | 0.019141359 | 0.034565819 | no |
| AVPR2     | 0.088594611  | 2.348198509  | 0.019143015 | 0.034565819 | no |
| EXOSC6    | -0.088589318 | -2.348057122 | 0.019150225 | 0.034575749 | no |
| ZNF581    | 0.08858656   | 2.347983434  | 0.019153983 | 0.034579447 | no |
| CSNK1D    | -0.088574895 | -2.347671816 | 0.019169884 | 0.034605064 | no |
| WWC1      | -0.08856402  | -2.347381288 | 0.019184719 | 0.034628752 | no |
| TMEM213   | -0.088560634 | -2.347290825 | 0.019189341 | 0.034634002 | no |
| C4orf42   | -0.088558983 | -2.347246718 | 0.019191594 | 0.034634977 | no |
| BTG2      | 0.088553923  | 2.34711156   | 0.019198501 | 0.03464435  | no |
| CLEC4GP1  | -0.088551292 | -2.347041255 | 0.019202095 | 0.034647743 | no |
| TMUB2     | 0.088536974  | 2.346658783  | 0.019221656 | 0.034675571 | no |
| DMD       | 0.088536657  | 2.346650303  | 0.01922209  | 0.034675571 | no |
| COL6A4P2  | -0.088535601 | -2.346622097 | 0.019223533 | 0.034675571 | no |
| SEPT7L    | -0.088534983 | -2.346605587 | 0.019224378 | 0.034675571 | no |
| GABRE     | 0.088532786  | 2.346546902  | 0.019227382 | 0.034677895 | no |
| LCE1F     | 0.088482165  | 2.345194595  | 0.019296702 | 0.034799814 | no |
| PATE2     | -0.088465713 | -2.344755112 | 0.019319277 | 0.034837419 | no |
| PIGW      | 0.088455918  | 2.344493453  | 0.019332729 | 0.034858567 | no |
| PUM1      | -0.088433768 | -2.343901726 | 0.01936318  | 0.034910359 | no |
| DCAF13    | 0.088412578  | 2.343335679  | 0.019392348 | 0.03495983  | no |
| RNF4      | 0.088391966  | 2.342785053  | 0.019420759 | 0.035007927 | no |
| NAGS      | 0.088366079  | 2.342093553  | 0.01945649  | 0.035069209 | no |
| PTGER3    | -0.08833825  | -2.341350147 | 0.019494968 | 0.03513543  | no |
| SLC48A1   | -0.088307221 | -2.34052129  | 0.019537947 | 0.035209752 | no |

|           |              |              |             |             |    |
|-----------|--------------|--------------|-------------|-------------|----|
| KLK2      | 0.088296165  | 2.340225939  | 0.019553281 | 0.035234246 | no |
| KIAA1191  | -0.088291132 | -2.340091501 | 0.019560265 | 0.03524369  | no |
| SNRPC     | 0.088278153  | 2.339744801  | 0.019578285 | 0.035273015 | no |
| FAM65A    | -0.088235125 | -2.338595439 | 0.019638128 | 0.035377678 | no |
| FAM186A   | -0.088202361 | -2.337720225 | 0.019683805 | 0.035456804 | no |
| KBTBD5    | -0.088199889 | -2.337654193 | 0.019687255 | 0.035459859 | no |
| C13orf38  | 0.088191262  | 2.337423753  | 0.019699299 | 0.035478391 | no |
| AHCYL2    | -0.08818858  | -2.337352122 | 0.019703044 | 0.035481975 | no |
| FGF18     | 0.088181517  | 2.337163461  | 0.01971291  | 0.035496582 | no |
| PHF20L1   | -0.088097024 | -2.334906533 | 0.019831279 | 0.035706546 | no |
| NPBWR2    | -0.088087725 | -2.334658151 | 0.019844344 | 0.035726888 | no |
| LOC728606 | -0.088082942 | -2.334530371 | 0.019851068 | 0.035735811 | no |
| KRTAP13-4 | 0.08807458   | 2.334307019  | 0.019862826 | 0.035753795 | no |
| HIF1A     | 0.088058199  | 2.333869481  | 0.019885878 | 0.035792102 | no |
| CHL1      | 0.088036806  | 2.333298039  | 0.019916019 | 0.035843161 | no |
| MYEOV2    | 0.088027289  | 2.333043838  | 0.01992944  | 0.035864123 | no |
| ID2B      | -0.088020222 | -2.332855073 | 0.019939411 | 0.035878873 | no |
| TULP4     | -0.088005219 | -2.332454332 | 0.019960594 | 0.035913793 | no |
| ZNF30     | -0.087980929 | -2.331805558 | 0.01999493  | 0.03597237  | no |
| LOC440925 | 0.087886391  | 2.329280438  | 0.020129062 | 0.036206327 | no |
| PCDHB18   | -0.087885959 | -2.329268897 | 0.020129677 | 0.036206327 | no |
| MED1      | -0.087885489 | -2.329256356 | 0.020130345 | 0.036206327 | no |
| RTEL1     | -0.087840969 | -2.328067238 | 0.020193786 | 0.0363172   | no |
| RPP25     | 0.087838807  | 2.328009493  | 0.020196871 | 0.036319518 | no |
| ADRA2C    | -0.087811792 | -2.327287964 | 0.020235455 | 0.036385667 | no |
| ATRIP     | -0.08777861  | -2.326401687 | 0.020282938 | 0.036467803 | no |
| MORF4L2   | 0.087762844  | 2.325980608  | 0.020305532 | 0.036505179 | no |
| ADAP1     | -0.087747876 | -2.32558082  | 0.020327004 | 0.036540531 | no |
| KCNE2     | -0.087746416 | -2.325541822 | 0.020329099 | 0.03654105  | no |
| RAET1L    | 0.087744688  | 2.325495675  | 0.020331579 | 0.036542258 | no |
| RBM18     | 0.08773716   | 2.325294618  | 0.020342387 | 0.036558434 | no |
| CCDC39    | 0.087691269  | 2.324068944  | 0.020408382 | 0.036673778 | no |
| KCNS1     | -0.087687773 | -2.323975583 | 0.020413417 | 0.036679565 | no |
| SQLE      | -0.087684928 | -2.32389958  | 0.020417516 | 0.03668367  | no |
| MCM7      | -0.087678691 | -2.323732997 | 0.020426504 | 0.036696557 | no |
| TLR4      | 0.087641738  | 2.32274606   | 0.020479822 | 0.036787173 | no |
| CCDC59    | 0.087641211  | 2.322731993  | 0.020480582 | 0.036787173 | no |
| TMEM219   | 0.087634216  | 2.32254516   | 0.02049069  | 0.036802058 | no |
| TMEM56    | -0.087618485 | -2.322125023 | 0.020513435 | 0.036839636 | no |
| ZNF343    | -0.087602983 | -2.321711014 | 0.020535869 | 0.03687665  | no |
| LOC728989 | -0.087598466 | -2.32159036  | 0.020542411 | 0.036885122 | no |
| ATOX1     | 0.087579076  | 2.321072516  | 0.020570511 | 0.036932296 | no |
| ZNF606    | -0.087570931 | -2.320854987 | 0.020582324 | 0.036950225 | no |
| STAMBP    | -0.087513862 | -2.319330825 | 0.020665265 | 0.03709583  | no |
| C1orf194  | 0.087476915  | 2.318344078  | 0.020719117 | 0.037189196 | no |
| LCOR      | -0.087473545 | -2.318254092 | 0.020724034 | 0.03719472  | no |
| TTC5      | 0.087463067  | 2.317974243  | 0.020739332 | 0.037218873 | no |
| KRAS      | -0.087461023 | -2.317919654 | 0.020742318 | 0.037220926 | no |
| USP44     | -0.087443129 | -2.317441771 | 0.020768468 | 0.037264544 | no |
| ZNF709    | -0.087440566 | -2.317373337 | 0.020772215 | 0.03726796  | no |
| G6PC2     | -0.087425786 | -2.316978597 | 0.02079384  | 0.037303448 | no |

|          |              |              |             |             |    |
|----------|--------------|--------------|-------------|-------------|----|
| BMS1     | -0.087409145 | -2.316534177 | 0.020818211 | 0.037343855 | no |
| KCNAB2   | -0.087372818 | -2.315564034 | 0.020871498 | 0.03743612  | no |
| KRT33B   | -0.087341881 | -2.314737831 | 0.020916972 | 0.037514357 | no |
| CACNB2   | -0.087334904 | -2.31455151  | 0.020927239 | 0.037529441 | no |
| MMP23A   | 0.087332786  | 2.31449495   | 0.020930357 | 0.037531703 | no |
| CLN3     | 0.087326963  | 2.31433943   | 0.020938931 | 0.037543749 | no |
| FHL1     | -0.087321577 | -2.314195611 | 0.020946863 | 0.037554631 | no |
| GPR153   | -0.08732032  | -2.314162028 | 0.020948716 | 0.037554631 | no |
| TDRD12   | -0.087317964 | -2.314099119 | 0.020952186 | 0.037557523 | no |
| SLC25A4  | -0.087287147 | -2.313276148 | 0.020997636 | 0.037635656 | no |
| NBPF7    | -0.087285769 | -2.313239343 | 0.02099967  | 0.037635966 | no |
| MTBP     | 0.087278941  | 2.313056979  | 0.021009754 | 0.037650701 | no |
| SNRNP48  | -0.087272455 | -2.312883768 | 0.021019335 | 0.037664533 | no |
| ZBTB26   | -0.087193039 | -2.310762977 | 0.021136961 | 0.037871949 | no |
| CA5BP    | -0.087188823 | -2.310650377 | 0.021143222 | 0.037879811 | no |
| FAM128A  | -0.087180183 | -2.310419667 | 0.021156056 | 0.037899445 | no |
| GLYCTK   | 0.08713615   | 2.309243791  | 0.021221572 | 0.038013445 | no |
| KLHL10   | 0.087129775  | 2.309073534  | 0.021231073 | 0.038027094 | no |
| OR1F1    | -0.087121209 | -2.308844786 | 0.021243844 | 0.038046597 | no |
| LRP1     | 0.087110043  | 2.308546621  | 0.0212605   | 0.038073055 | no |
| ANKRD57  | 0.087076535  | 2.307651809  | 0.021310555 | 0.038159313 | no |
| PRRT3    | -0.087073527 | -2.307571486 | 0.021315054 | 0.038162775 | no |
| ZC3H12C  | -0.087072718 | -2.307549883 | 0.021316264 | 0.038162775 | no |
| PGBD3    | -0.087064345 | -2.307326311 | 0.021328789 | 0.038181818 | no |
| H2AFV    | -0.087062086 | -2.307265965 | 0.021332171 | 0.038184491 | no |
| ALG10B   | -0.087033503 | -2.306502696 | 0.021374987 | 0.038257744 | no |
| TCN1     | 0.087013301  | 2.305963226  | 0.021405294 | 0.038308598 | no |
| FRMPD2   | -0.087011562 | -2.305916794 | 0.021407904 | 0.038309878 | no |
| WNT1     | 0.087008833  | 2.305843927  | 0.021412001 | 0.038313818 | no |
| GATC     | 0.08700596   | 2.305767208  | 0.021416315 | 0.038318147 | no |
| DEFA4    | 0.087001955  | 2.305660264  | 0.02142233  | 0.038324472 | no |
| TGFBRAP1 | -0.087000502 | -2.305621452 | 0.021424514 | 0.038324472 | no |
| PREX2    | -0.08699982  | -2.305603261 | 0.021425537 | 0.038324472 | no |
| ZKSCAN1  | -0.086977656 | -2.305011388 | 0.021458858 | 0.038380679 | no |
| C5orf54  | -0.086974858 | -2.304936671 | 0.021463068 | 0.038384813 | no |
| C14orf4  | 0.086972085  | 2.304862621  | 0.021467241 | 0.03838888  | no |
| CCNC     | 0.086966013  | 2.304700488  | 0.02147638  | 0.038401826 | no |
| CCDC121  | 0.086958995  | 2.304513086  | 0.021486947 | 0.038417324 | no |
| PKIG     | 0.086944959  | 2.304138295  | 0.021508095 | 0.038451734 | no |
| ENC1     | -0.08693299  | -2.303818682 | 0.021526143 | 0.038480598 | no |
| C16orf80 | -0.086927913 | -2.303683104 | 0.021533803 | 0.038490884 | no |
| C22orf24 | -0.086926653 | -2.30364946  | 0.021535705 | 0.038490884 | no |
| ADM2     | 0.086904249  | 2.303051225  | 0.021569535 | 0.038547942 | no |
| VPS4B    | 0.086899949  | 2.302936396  | 0.021576035 | 0.038556149 | no |
| ZNF193   | -0.086860878 | -2.301893106 | 0.02163516  | 0.038658389 | no |
| CCDC33   | 0.086846662  | 2.301513489  | 0.021656709 | 0.038693474 | no |
| C3orf34  | 0.086841938  | 2.30138736   | 0.021663873 | 0.038702853 | no |
| UBXN2A   | 0.086827301  | 2.300996521  | 0.021686085 | 0.038739112 | no |
| WNT2     | 0.086819009  | 2.300775091  | 0.021698678 | 0.038758183 | no |
| PRICKLE2 | -0.08681073  | -2.300554042 | 0.021711256 | 0.038773802 | no |
| USP3     | -0.086810695 | -2.300553104 | 0.021711309 | 0.038773802 | no |

|           |              |              |             |             |    |
|-----------|--------------|--------------|-------------|-------------|----|
| DHRS7C    | -0.086809467 | -2.300520306 | 0.021713176 | 0.038773802 | no |
| AP2A1     | -0.086790955 | -2.300026003 | 0.021741327 | 0.038820643 | no |
| C19orf53  | 0.086787573  | 2.299935709  | 0.021746472 | 0.038826031 | no |
| CYB5R2    | 0.086786448  | 2.299905666  | 0.021748185 | 0.038826031 | no |
| C12orf11  | 0.086778973  | 2.299706063  | 0.021759564 | 0.038842917 | no |
| HEPH      | 0.086736852  | 2.298581354  | 0.021823783 | 0.038954114 | no |
| GATAD1    | 0.086731709  | 2.298444032  | 0.021831635 | 0.038964689 | no |
| IPMK      | -0.086727893 | -2.298342134 | 0.021837463 | 0.038971651 | no |
| MSX2P1    | -0.086712726 | -2.297937151 | 0.02186064  | 0.039009569 | no |
| PCDHGB7   | -0.086696438 | -2.297502254 | 0.021885553 | 0.039050579 | no |
| PGLYRP2   | 0.086691185  | 2.297361995  | 0.021893593 | 0.039061477 | no |
| EIF5B     | -0.086687554 | -2.297265034 | 0.021899152 | 0.039067948 | no |
| KIF12     | -0.086677263 | -2.296990257 | 0.021914914 | 0.039092617 | no |
| PKD2L1    | 0.086665888  | 2.296686527  | 0.021932348 | 0.039120265 | no |
| AHCY      | 0.086643505  | 2.296088877  | 0.021966688 | 0.03917806  | no |
| RBPMS2    | 0.086616747  | 2.295374416  | 0.022007801 | 0.039247925 | no |
| GADD45B   | 0.086591897  | 2.294710905  | 0.022046043 | 0.039312656 | no |
| TEX2      | 0.086590053  | 2.294661672  | 0.022048882 | 0.039314252 | no |
| TAF1      | -0.086573405 | -2.294217161 | 0.022074537 | 0.039356525 | no |
| FAM160B1  | -0.086553217 | -2.293678137 | 0.022105682 | 0.039408577 | no |
| RAD51C    | -0.086548366 | -2.293548626 | 0.02211317  | 0.039418452 | no |
| CGA       | 0.086544908  | 2.293456293  | 0.022118511 | 0.039424495 | no |
| CENPP     | 0.086527938  | 2.293003185  | 0.022144734 | 0.039467756 | no |
| 12-Sep    | -0.086517142 | -2.292714947 | 0.022161429 | 0.039493778 | no |
| FAM193B   | -0.086515971 | -2.292683678 | 0.022163241 | 0.039493778 | no |
| ADRM1     | 0.086497988  | 2.292203538  | 0.022191079 | 0.039539898 | no |
| DNAJC30   | 0.086493652  | 2.292087772  | 0.022197795 | 0.03954838  | no |
| TCEB3     | 0.086460067  | 2.291191059  | 0.02224988  | 0.039636931 | no |
| ZNF584    | 0.086459076  | 2.291164604  | 0.022251418 | 0.039636931 | no |
| PPP2R3A   | 0.086453965  | 2.291028122  | 0.022259355 | 0.039647576 | no |
| DSG1      | -0.086440237 | -2.290661598 | 0.022280683 | 0.039682069 | no |
| SLC4A3    | 0.086428976  | 2.290360938  | 0.022298191 | 0.03970643  | no |
| KIAA1239  | -0.086428913 | -2.290359262 | 0.022298289 | 0.03970643  | no |
| ADAMTS3   | 0.086417574  | 2.290056514  | 0.022315931 | 0.039734093 | no |
| ZC3H15    | 0.086416299  | 2.290022466  | 0.022317916 | 0.039734093 | no |
| ADH1A     | 0.08641514   | 2.289991521  | 0.02231972  | 0.039734093 | no |
| NANOS1    | -0.086411944 | -2.289906205 | 0.022324695 | 0.03973945  | no |
| XP05      | -0.086383112 | -2.289136394 | 0.022369624 | 0.039815923 | no |
| HNMT      | 0.086356275  | 2.288419888  | 0.022411514 | 0.039886971 | no |
| PPP1R8    | 0.086341663  | 2.288029777  | 0.02243435  | 0.039924099 | no |
| ANKRD44   | 0.086329717  | 2.287710826  | 0.022453035 | 0.039953835 | no |
| LOC407835 | 0.086297594  | 2.286853186  | 0.022503347 | 0.040039837 | no |
| UBE4A     | -0.086286492 | -2.28655677  | 0.022520758 | 0.040067291 | no |
| PRB1      | -0.086268892 | -2.286086881 | 0.022548384 | 0.04011291  | no |
| RC3H1     | -0.086263213 | -2.285935255 | 0.022557304 | 0.040125248 | no |
| ITGAE     | 0.086260593  | 2.285865322  | 0.022561419 | 0.040129038 | no |
| YIF1B     | 0.086249407  | 2.285566685  | 0.022579001 | 0.040156777 | no |
| UBE2J2    | 0.086239118  | 2.285291983  | 0.022595184 | 0.040182023 | no |
| OR2C3     | 0.086218887  | 2.284751849  | 0.022627032 | 0.040235122 | no |
| FTCD      | -0.086215112 | -2.284651064 | 0.02263298  | 0.040242158 | no |
| RFWD3     | 0.086179773  | 2.283707583  | 0.022688718 | 0.040337716 | no |



|            |              |              |             |             |    |
|------------|--------------|--------------|-------------|-------------|----|
| ISLR2      | -0.086177631 | -2.283650412 | 0.0226921   | 0.04034018  | no |
| RAB19      | 0.086173649  | 2.2835441    | 0.022698389 | 0.040347813 | no |
| RPA4       | 0.086151789  | 2.282960488  | 0.02273294  | 0.040400354 | no |
| CNTF       | 0.086151389  | 2.282949822  | 0.022733572 | 0.040400354 | no |
| ZDHHC8     | -0.086151156 | -2.282943577 | 0.022733942 | 0.040400354 | no |
| MED9       | -0.086113917 | -2.281949397 | 0.022792907 | 0.040501581 | no |
| NRIP3      | -0.086093212 | -2.281396652 | 0.022825748 | 0.040556374 | no |
| AIFM2      | 0.086088818  | 2.281279329  | 0.022832724 | 0.040565204 | no |
| ASXL2      | 0.086083377  | 2.281134075  | 0.022841363 | 0.040576987 | no |
| SFPQ       | -0.086075294 | -2.28091828  | 0.022854204 | 0.040593077 | no |
| FLJ35024   | -0.086075147 | -2.280914372 | 0.022854436 | 0.040593077 | no |
| C7orf53    | 0.086063285  | 2.280597677  | 0.022873292 | 0.040622696 | no |
| JHDM1D     | -0.086062128 | -2.280566801 | 0.022875131 | 0.040622696 | no |
| TAOK1      | -0.086050363 | -2.280252718 | 0.022893845 | 0.04065236  | no |
| SLC5A8     | -0.08603647  | -2.279881826 | 0.022915962 | 0.040685849 | no |
| C15orf39   | -0.086035988 | -2.279868956 | 0.02291673  | 0.040685849 | no |
| TMC7       | 0.086014253  | 2.279288708  | 0.022951369 | 0.040743769 | no |
| NFIA       | -0.086005361 | -2.279051307 | 0.022965555 | 0.040764249 | no |
| PCDHGA1    | -0.086004494 | -2.279028155 | 0.022966939 | 0.040764249 | no |
| BAZ1A      | 0.085992978  | 2.278720723  | 0.022985321 | 0.040793295 | no |
| NCRNA00181 | 0.085984474  | 2.278493709  | 0.022998903 | 0.040813817 | no |
| DSEL       | -0.085963474 | -2.277933082 | 0.023032475 | 0.040869806 | no |
| ATP2C2     | -0.085957987 | -2.277786616 | 0.023041252 | 0.040880751 | no |
| BCS1L      | -0.085957091 | -2.277762686 | 0.023042687 | 0.040880751 | no |
| FOXP1      | 0.085932975  | 2.277118882  | 0.023081307 | 0.040945675 | no |
| POLR1B     | -0.085930352 | -2.277048856 | 0.023085511 | 0.04094954  | no |
| SLC30A10   | -0.085925822 | -2.27692792  | 0.023092773 | 0.040958828 | no |
| MAP1B      | 0.085918704  | 2.276737905  | 0.023104187 | 0.040975478 | no |
| BCL2L1     | 0.085915149  | 2.276643006  | 0.023109889 | 0.040981997 | no |
| MON1B      | -0.085911719 | -2.27655144  | 0.023115393 | 0.040988161 | no |
| SLC5A6     | 0.085882309  | 2.275766318  | 0.023162627 | 0.041068314 | no |
| FBXW9      | 0.085866994  | 2.275357486  | 0.023187256 | 0.041108378 | no |
| LOC151658  | 0.085842703  | 2.274709022  | 0.023226368 | 0.041174109 | no |
| C8orf39    | -0.085832959 | -2.2744489   | 0.023242073 | 0.041198338 | no |
| MGAT5      | 0.085798144  | 2.273519507  | 0.023298263 | 0.041294317 | no |
| NR1H4      | -0.085795452 | -2.273447649 | 0.023302612 | 0.041298406 | no |
| CT62       | -0.085773147 | -2.272852214 | 0.023338679 | 0.0413587   | no |
| SOCS5      | 0.085758959  | 2.27247347   | 0.023361646 | 0.041395771 | no |
| MICAL1     | -0.085735735 | -2.271853508 | 0.023399282 | 0.041458827 | no |
| UOX        | 0.08573262   | 2.271770358  | 0.023404334 | 0.041464145 | no |
| SSR2       | 0.085729865  | 2.27169683   | 0.023408802 | 0.041468427 | no |
| SLC38A8    | -0.085716575 | -2.27134204  | 0.023430371 | 0.041503001 | no |
| PHYHD1     | -0.085712845 | -2.271242472 | 0.023436428 | 0.041510077 | no |
| RBM24      | 0.085711586  | 2.271208865  | 0.023438472 | 0.041510077 | no |
| ZNF182     | -0.085707376 | -2.271096481 | 0.02344531  | 0.04151855  | no |
| SIN3B      | -0.085698865 | -2.270869287 | 0.02345914  | 0.041539401 | no |
| CNPY2      | 0.08569714   | 2.270823235  | 0.023461944 | 0.041540728 | no |
| SIX4       | -0.085679165 | -2.270343415 | 0.023491176 | 0.041588844 | no |
| C7orf69    | 0.085668247  | 2.270051962  | 0.023508948 | 0.041616664 | no |
| DPYSL3     | -0.085606826 | -2.268412408 | 0.023609142 | 0.041790373 | no |
| MMP7       | 0.085598172  | 2.268181391  | 0.02362329  | 0.041808878 | no |

|              |              |              |             |             |    |
|--------------|--------------|--------------|-------------|-------------|----|
| NPTX2        | 0.085597901  | 2.268174161  | 0.023623732 | 0.041808878 | no |
| HSP90B3P     | 0.085591621  | 2.268006523  | 0.023634003 | 0.041823394 | no |
| NUBP2        | -0.085575161 | -2.267567156 | 0.023660941 | 0.041867399 | no |
| ABT1         | 0.0855611    | 2.267191825  | 0.023683974 | 0.041904487 | no |
| PIAS1        | 0.085545603  | 2.266778163  | 0.023709381 | 0.04194577  | no |
| C19orf75     | 0.085516991  | 2.266014416  | 0.023756353 | 0.042025195 | no |
| KIAA1522     | 0.085508909  | 2.265798681  | 0.023769636 | 0.042045013 | no |
| IQSEC2       | -0.085505958 | -2.265719919 | 0.023774487 | 0.042049915 | no |
| DULLARD      | -0.085468497 | -2.264719967 | 0.02383615  | 0.04215529  | no |
| PRPS1        | -0.085457074 | -2.264415049 | 0.02385498  | 0.042184902 | no |
| CCL14-CCL15  | 0.085450713  | 2.264245252  | 0.023865472 | 0.042199765 | no |
| RUNDC1       | -0.08544683  | -2.264141621 | 0.023871877 | 0.042207399 | no |
| C6orf147     | 0.085436664  | 2.263870274  | 0.023888656 | 0.042233372 | no |
| KLK5         | -0.085434409 | -2.263810074 | 0.023892379 | 0.042236262 | no |
| SOS1         | -0.08542982  | -2.263687571 | 0.023899959 | 0.042245966 | no |
| ZNF532       | -0.085396717 | -2.262803981 | 0.023954688 | 0.042339006 | no |
| TRAF6        | 0.085376281  | 2.262258497  | 0.02398853  | 0.042395114 | no |
| MBLAC1       | -0.085355912 | -2.261714798 | 0.024022302 | 0.042451089 | no |
| MGC70857     | -0.085350567 | -2.261572145 | 0.02403117  | 0.042463048 | no |
| BHLHB9       | -0.085307661 | -2.260426902 | 0.024102466 | 0.042585306 | no |
| CHST7        | 0.085290613  | 2.259971863  | 0.024130845 | 0.042631722 | no |
| NOP16        | 0.085278666  | 2.259652982  | 0.02415075  | 0.042663159 | no |
| FGF5         | 0.08526272   | 2.259227379  | 0.024177338 | 0.042706397 | no |
| MSRB2        | -0.085249395 | -2.258871702 | 0.024199577 | 0.042741946 | no |
| LOC645752    | 0.085244576  | 2.258743082  | 0.024207624 | 0.042752423 | no |
| RNASEH2B     | 0.085234144  | 2.258464639  | 0.024225052 | 0.042779465 | no |
| ZNF419       | -0.085226298 | -2.258255219 | 0.024238166 | 0.042798886 | no |
| ZSCAN10      | -0.085189629 | -2.2572765   | 0.02429954  | 0.04290351  | no |
| DYNLRB2      | 0.085170849  | 2.256775253  | 0.024331024 | 0.042955348 | no |
| HMGA1        | 0.085156509  | 2.256392491  | 0.02435509  | 0.042994081 | no |
| LOC100134713 | 0.08514813   | 2.25616885   | 0.024369161 | 0.043015164 | no |
| PDE10A       | -0.085135085 | -2.25582068  | 0.02439108  | 0.043050097 | no |
| LYAR         | 0.085111577  | 2.255193249  | 0.024430625 | 0.043116129 | no |
| PAQR8        | -0.085098704 | -2.254849667 | 0.024452303 | 0.043150621 | no |
| CREB3L1      | 0.085092899  | 2.254694712  | 0.024462086 | 0.043164117 | no |
| TBC1D3G      | -0.085063478 | -2.253909467 | 0.024511711 | 0.043247907 | no |
| SSBP4        | 0.085046586  | 2.253458638  | 0.024540241 | 0.043294467 | no |
| ABR          | -0.085022369 | -2.252812287 | 0.024581195 | 0.043362935 | no |
| MST1P9       | -0.08502059  | -2.252764819 | 0.024584205 | 0.043364462 | no |
| MED26        | -0.08499762  | -2.252151739 | 0.02462311  | 0.043429298 | no |
| ZDHHC9       | 0.084956176  | 2.251045633  | 0.024693437 | 0.043549538 | no |
| MON2         | -0.084949808 | -2.250875668 | 0.024704259 | 0.043564824 | no |
| NCEH1        | 0.084942958  | 2.250692847  | 0.024715904 | 0.043581558 | no |
| FNDC3A       | 0.08490609   | 2.24970888   | 0.024778661 | 0.043688408 | no |
| RPL7L1       | -0.084856229 | -2.248378158 | 0.024863754 | 0.043833742 | no |
| ULK2         | -0.08485525  | -2.248352051 | 0.024865426 | 0.043833742 | no |
| GRAMD3       | -0.084834257 | -2.247791757 | 0.024901332 | 0.043893211 | no |
| SFRS7        | 0.084827487  | 2.247611088  | 0.02491292  | 0.043909808 | no |
| PRPF18       | -0.084824057 | -2.247519561 | 0.024918792 | 0.04391633  | no |
| IL11RA       | -0.084820281 | -2.247418777 | 0.024925259 | 0.043921837 | no |
| CPLX3        | -0.084819696 | -2.247403156 | 0.024926262 | 0.043921837 | no |

|            |              |              |             |             |    |
|------------|--------------|--------------|-------------|-------------|----|
| TDRD10     | 0.084789513  | 2.246597637  | 0.024978006 | 0.044005983 | no |
| ZNF410     | 0.084789302  | 2.246592002  | 0.024978369 | 0.044005983 | no |
| NDUFB1     | 0.084787239  | 2.246536943  | 0.024981909 | 0.044008385 | no |
| CRISP1     | 0.084785225  | 2.246483207  | 0.024985365 | 0.044010638 | no |
| TMEM88     | -0.084771426 | -2.246114933 | 0.025009059 | 0.044048537 | no |
| CA5B       | 0.084769065  | 2.246051924  | 0.025013115 | 0.044050461 | no |
| USP48      | 0.084767615  | 2.246013211  | 0.025015607 | 0.044050461 | no |
| C13orf36   | -0.084766986 | -2.245996426 | 0.025016688 | 0.044050461 | no |
| TP63       | 0.084746683  | 2.245454582  | 0.025051594 | 0.044108083 | no |
| FAM27A     | 0.084691652  | 2.243985957  | 0.025146416 | 0.044271181 | no |
| VPS25      | 0.084684857  | 2.243804614  | 0.025158146 | 0.044287976 | no |
| EZR        | -0.084636587 | -2.242516411 | 0.02524161  | 0.044431035 | no |
| PCBD2      | -0.084624524 | -2.242194491 | 0.025262505 | 0.044463944 | no |
| LOC344595  | 0.084621321  | 2.242109022  | 0.025268055 | 0.044469841 | no |
| RPL10L     | -0.084599946 | -2.241538593 | 0.025305124 | 0.044531203 | no |
| CCDC37     | 0.084582101  | 2.24106236   | 0.025336107 | 0.044581847 | no |
| VCX3A      | 0.084575213  | 2.240878531  | 0.025348076 | 0.044599026 | no |
| OR4D1      | 0.084570495  | 2.240752635  | 0.025356276 | 0.044609571 | no |
| CTAGE9     | 0.084549245  | 2.240185551  | 0.025393239 | 0.044670713 | no |
| CLIC5      | -0.084525213 | -2.239544214 | 0.025435098 | 0.044740456 | no |
| HEATR5B    | -0.084521561 | -2.239446751 | 0.025441464 | 0.044747762 | no |
| NUDCD3     | -0.084507352 | -2.239067577 | 0.025466246 | 0.044787453 | no |
| PGM1       | 0.08449335   | 2.238693915  | 0.025490688 | 0.044826539 | no |
| DCLK3      | 0.084490688  | 2.238622871  | 0.025495337 | 0.044829619 | no |
| RHCE       | 0.084489808  | 2.238599395  | 0.025496873 | 0.044829619 | no |
| FAM116B    | -0.084459474 | -2.237789897 | 0.025549905 | 0.044918954 | no |
| SPPL2B     | -0.084452665 | -2.237608218 | 0.02556182  | 0.044935995 | no |
| ZNF362     | -0.084450046 | -2.237538304 | 0.025566407 | 0.04494015  | no |
| ISYNA1     | 0.084443433  | 2.237361852  | 0.025577985 | 0.044956297 | no |
| FOXH1      | -0.08444226  | -2.237330551 | 0.02558004  | 0.044956297 | no |
| STK32B     | 0.084413689  | 2.236568116  | 0.025630127 | 0.045040408 | no |
| CCDC148    | 0.084410824  | 2.236491665  | 0.025635154 | 0.045045327 | no |
| C15orf21   | -0.084404943 | -2.236334718 | 0.025645476 | 0.04505955  | no |
| LOC389332  | -0.084402459 | -2.236268429 | 0.025649837 | 0.045063296 | no |
| MSTN       | -0.084399793 | -2.23619728  | 0.025654519 | 0.045067604 | no |
| CARS2      | 0.084383749  | 2.235769136  | 0.025682705 | 0.0451132   | no |
| SEPSECS    | 0.084359989  | 2.235135122  | 0.025724495 | 0.04518268  | no |
| UBE2M      | -0.084355354 | -2.235011416 | 0.025732655 | 0.045193088 | no |
| NCRNA00114 | 0.084341338  | 2.234637403  | 0.025757342 | 0.045232514 | no |
| SESN2      | 0.084328124  | 2.234284799  | 0.025780634 | 0.045265747 | no |
| ZNF192     | -0.084328062 | -2.234283139 | 0.025780744 | 0.045265747 | no |
| TNFSF9     | 0.084320918  | 2.234092501  | 0.025793344 | 0.045283938 | no |
| EIF2S2     | 0.084308607  | 2.233763979  | 0.025815071 | 0.045318148 | no |
| GNMT       | -0.084263351 | -2.232556354 | 0.025895075 | 0.045452128 | no |
| OR10Q1     | -0.084262892 | -2.2325441   | 0.025895888 | 0.045452128 | no |
| PECR       | 0.084258076  | 2.232415584  | 0.025904415 | 0.045463148 | no |
| GAPDH      | 0.084245887  | 2.232090327  | 0.025926006 | 0.045497092 | no |
| EDDM3A     | 0.084233034  | 2.231747348  | 0.025948791 | 0.045533124 | no |
| LOC613037  | 0.084229067  | 2.231641495  | 0.025955826 | 0.045538521 | no |
| TOPORS     | -0.08422876  | -2.231633294 | 0.025956371 | 0.045538521 | no |
| CD22       | 0.08421198   | 2.231185556  | 0.025986149 | 0.045586808 | no |

|          |              |              |             |             |    |
|----------|--------------|--------------|-------------|-------------|----|
| ALKBH6   | 0.08420088   | 2.230889352  | 0.026005865 | 0.045617437 | no |
| C9orf80  | 0.084197627  | 2.230802557  | 0.026011645 | 0.045623617 | no |
| COCH     | 0.084189073  | 2.230574298  | 0.02602685  | 0.045646326 | no |
| RUVBL1   | 0.084179643  | 2.230322654  | 0.026043621 | 0.045671779 | no |
| NDUFB5   | 0.084174894  | 2.230195956  | 0.026052069 | 0.045682631 | no |
| HSD17B10 | 0.084169397  | 2.230049255  | 0.026061854 | 0.045695825 | no |
| TRPS1    | 0.084139504  | 2.229251606  | 0.02611511  | 0.045785232 | no |
| KIAA1529 | -0.084111063 | -2.228492694 | 0.026165867 | 0.045870243 | no |
| SHROOM2  | -0.084104783 | -2.228325132 | 0.026177086 | 0.04588593  | no |
| C4orf45  | -0.084089633 | -2.227920879 | 0.026204168 | 0.045929421 | no |
| RNF220   | -0.08408637  | -2.227833801 | 0.026210005 | 0.045935669 | no |
| TMEM82   | 0.084069844  | 2.227392839  | 0.02623958  | 0.045983516 | no |
| MED22    | -0.084066355 | -2.227299736 | 0.026245828 | 0.045990478 | no |
| SNORA31  | 0.084044368  | 2.226713063  | 0.026285228 | 0.046055528 | no |
| MEG3     | -0.084040821 | -2.226618416 | 0.026291589 | 0.046062682 | no |
| FABP5L3  | 0.084017579  | 2.225998259  | 0.026333303 | 0.046131766 | no |
| TNFAIP1  | -0.083981415 | -2.225033299 | 0.026398322 | 0.046239872 | no |
| PSMG3    | 0.083980713  | 2.225014561  | 0.026399586 | 0.046239872 | no |
| NUP214   | -0.083975989 | -2.224888522 | 0.02640809  | 0.046250759 | no |
| FAM73A   | -0.083967051 | -2.224650029 | 0.026424186 | 0.046274941 | no |
| FNIP2    | 0.083960637  | 2.224478908  | 0.026435741 | 0.046291166 | no |
| MGC3771  | -0.083951208 | -2.224227307 | 0.026452737 | 0.046316917 | no |
| PRKAB2   | -0.083942136 | -2.223985255 | 0.026469098 | 0.046341551 | no |
| MUC20    | -0.08393545  | -2.22380685  | 0.026481162 | 0.046358658 | no |
| RNF32    | -0.083909266 | -2.223108202 | 0.026528453 | 0.046437425 | no |
| OGG1     | -0.083897526 | -2.222794952 | 0.02654968  | 0.046470559 | no |
| LCN10    | 0.083892964  | 2.222673236  | 0.026557932 | 0.046480979 | no |
| UCMA     | 0.083886872  | 2.222510692  | 0.026568955 | 0.046496247 | no |
| PRIM2    | 0.083883232  | 2.22241357   | 0.026575544 | 0.046503751 | no |
| OIP5     | 0.083878059  | 2.222275549  | 0.026584909 | 0.046516114 | no |
| POLR3E   | -0.083870064 | -2.222062233 | 0.026599389 | 0.046537422 | no |
| DNAJC24  | -0.083843939 | -2.221365174 | 0.026646754 | 0.046616257 | no |
| NLRP2    | 0.083837725  | 2.221199369  | 0.026658031 | 0.04663195  | no |
| LINS1    | 0.083809169  | 2.220437438  | 0.026709907 | 0.046718652 | no |
| FOXA1    | 0.083805354  | 2.220335652  | 0.026716844 | 0.046726743 | no |
| SLC22A15 | 0.08375863   | 2.219088991  | 0.026801929 | 0.046869438 | no |
| GGPS1    | 0.083758005  | 2.219072316  | 0.026803069 | 0.046869438 | no |
| FLCN     | 0.08373928   | 2.218572737  | 0.026837233 | 0.046925121 | no |
| ST70T3   | -0.083732156 | -2.218382651 | 0.026850241 | 0.046943807 | no |
| ZNF616   | 0.083712739  | 2.217864593  | 0.026885724 | 0.047001778 | no |
| TAF9     | 0.083705064  | 2.217659811  | 0.02689976  | 0.047022251 | no |
| CD1A     | 0.083680472  | 2.217003676  | 0.026944778 | 0.047096872 | no |
| CCKBR    | -0.083617883 | -2.215333793 | 0.027059643 | 0.047293556 | no |
| C18orf19 | 0.083597534  | 2.214790892  | 0.027097078 | 0.04735489  | no |
| CLSPN    | 0.083583047  | 2.214404365  | 0.027123758 | 0.047397419 | no |
| IFT52    | 0.083570113  | 2.214059286  | 0.027147596 | 0.047434976 | no |
| ITPA     | 0.083560763  | 2.213809849  | 0.027164839 | 0.047461001 | no |
| RS1      | -0.083512715 | -2.212527949 | 0.0272536   | 0.047611967 | no |
| XDH      | 0.083510924  | 2.212480154  | 0.027256915 | 0.047613643 | no |
| INTS4L1  | -0.083507613 | -2.212391816 | 0.027263041 | 0.04762023  | no |
| EEF1E1   | -0.083468945 | -2.211360188 | 0.027334677 | 0.047741232 | no |

|           |              |              |             |             |    |
|-----------|--------------|--------------|-------------|-------------|----|
| CBL1      | -0.08346117  | -2.211152748 | 0.027349101 | 0.047762298 | no |
| CHODL     | 0.083456848  | 2.211037459  | 0.02735712  | 0.047772177 | no |
| C2orf88   | -0.083451136 | -2.210885055 | 0.027367725 | 0.047786567 | no |
| EIF4EBP3  | 0.083447942  | 2.210799844  | 0.027373655 | 0.047789612 | no |
| ARHGAP8   | 0.08344765   | 2.210792072  | 0.027374196 | 0.047789612 | no |
| ZNF560    | -0.083442162 | -2.210645657 | 0.027384389 | 0.047803279 | no |
| FABP2     | 0.083407462  | 2.209719888  | 0.027448914 | 0.047911779 | no |
| DUSP28    | -0.083396093 | -2.20941659  | 0.027470082 | 0.047944588 | no |
| BRWD3     | -0.083366836 | -2.20863606  | 0.027524622 | 0.048035633 | no |
| CHMP2A    | 0.083353589  | 2.208282643  | 0.027549348 | 0.048074634 | no |
| AKAP9     | -0.083348095 | -2.208136068 | 0.027559608 | 0.048088389 | no |
| TARBP2    | 0.083337088  | 2.207842412  | 0.027580175 | 0.048120122 | no |
| C19orf50  | 0.083317063  | 2.207308203  | 0.027617622 | 0.0481813   | no |
| CCDC70    | 0.083306134  | 2.20701663   | 0.027638079 | 0.048210803 | no |
| ODF1      | -0.083305481 | -2.206999204 | 0.027639303 | 0.048210803 | no |
| GSC2      | -0.083286467 | -2.206491968 | 0.027674924 | 0.048268746 | no |
| RPUSD1    | -0.083285202 | -2.206458213 | 0.027677296 | 0.048268746 | no |
| SLIT3     | 0.083271229  | 2.206085439  | 0.027703502 | 0.048310281 | no |
| CTTN      | 0.083258084  | 2.20573476   | 0.027728174 | 0.048349135 | no |
| ANKRD33   | 0.083244833  | 2.205381267  | 0.027753063 | 0.048386963 | no |
| CBLC      | 0.083243987  | 2.205358675  | 0.027754655 | 0.048386963 | no |
| ORMDL1    | 0.083242656  | 2.205323184  | 0.027757155 | 0.048387149 | no |
| QRICH2    | -0.083238827 | -2.205221041 | 0.027764351 | 0.048394588 | no |
| MASP2     | -0.083237839 | -2.20519467  | 0.027766209 | 0.048394588 | no |
| DGKE      | -0.083222455 | -2.204784261 | 0.027795142 | 0.04844084  | no |
| TMEM204   | 0.083216197  | 2.20461731   | 0.027806919 | 0.048457188 | no |
| NCAPG     | 0.083214255  | 2.20456552   | 0.027810574 | 0.048459379 | no |
| MSH3      | 0.083206386  | 2.204355583  | 0.027825391 | 0.04848102  | no |
| C6orf222  | -0.083194245 | -2.204031696 | 0.027848264 | 0.048516691 | no |
| PLEKHH3   | -0.083184543 | -2.203772874 | 0.027866554 | 0.048544373 | no |
| PAK6      | -0.08317271  | -2.203457212 | 0.027888875 | 0.04857907  | no |
| VSIG10    | -0.083142368 | -2.202647776 | 0.027946181 | 0.048674697 | no |
| KIAA1383  | 0.083137587  | 2.202520232  | 0.02795522  | 0.048686246 | no |
| CXCL2     | 0.083135198  | 2.202456493  | 0.027959738 | 0.048689921 | no |
| B4GALT3   | 0.083113736  | 2.201883967  | 0.02800035  | 0.048756444 | no |
| JAM3      | 0.083084419  | 2.201101873  | 0.02805591  | 0.048848982 | no |
| OSTBETA   | 0.083078826  | 2.20095269   | 0.028066518 | 0.048863246 | no |
| GSK3A     | -0.083063875 | -2.200553832 | 0.028094899 | 0.048908444 | no |
| PPIP5K1   | -0.083032135 | -2.199707138 | 0.028155228 | 0.049009246 | no |
| SNX13     | 0.082984251  | 2.198429786  | 0.028246454 | 0.049163808 | no |
| PDE7B     | 0.082974032  | 2.198157198  | 0.028265954 | 0.049193515 | no |
| SLN       | 0.082922815  | 2.196790931  | 0.028363871 | 0.049359678 | no |
| ANXA9     | -0.082915486 | -2.196595441 | 0.028377905 | 0.04937985  | no |
| OTC       | -0.082889877 | -2.19591231  | 0.028426994 | 0.049461012 | no |
| PUSL1     | 0.082879396  | 2.195632735  | 0.028447104 | 0.049491744 | no |
| PPAN      | -0.082871174 | -2.195413403 | 0.028462891 | 0.049514948 | no |
| RFWD2     | 0.082857723  | 2.195054611  | 0.02848873  | 0.049555635 | no |
| NR2C1     | -0.082847692 | -2.194787018 | 0.028508015 | 0.049584915 | no |
| P2RY14    | 0.082835783  | 2.194469341  | 0.028530924 | 0.049620492 | no |
| C14orf135 | -0.082812606 | -2.193851121 | 0.028575552 | 0.049693834 | no |
| OR1D2     | -0.082805753 | -2.193668322 | 0.028588759 | 0.049712526 | no |

|              |              |              |             |             |    |
|--------------|--------------|--------------|-------------|-------------|----|
| C19orf56     | 0.082781709  | 2.193026952  | 0.02863514  | 0.049788895 | no |
| PTS          | 0.082766829  | 2.192630021  | 0.028663877 | 0.049834575 | no |
| OR2B11       | 0.082744137  | 2.192024727  | 0.028707747 | 0.049906555 | no |
| PDZD11       | 0.082728856  | 2.191617118  | 0.028737322 | 0.049953673 | no |
| MCM2         | 0.082714679  | 2.191238972  | 0.028764783 | 0.049995459 | no |
| ZNF335       | -0.082713893 | -2.191218001 | 0.028766306 | 0.049995459 | no |
| LGI2         | 0.082710362  | 2.191123816  | 0.02877315  | 0.050003055 | no |
| PSMD2        | 0.082701597  | 2.190890028  | 0.028790143 | 0.050028286 | no |
| NPM1         | -0.082636358 | -2.189149846 | 0.028916902 | 0.050244235 | no |
| HSF1         | -0.082619686 | -2.188705144 | 0.028949372 | 0.050296331 | no |
| SFTA1P       | 0.082614051  | 2.188554851  | 0.028960353 | 0.050311085 | no |
| FAM3C        | 0.082586083  | 2.187808851  | 0.029014911 | 0.050401535 | no |
| ABCA8        | 0.082580633  | 2.187663493  | 0.029025552 | 0.050415688 | no |
| ITLN2        | 0.082569746  | 2.18737309   | 0.029046821 | 0.050448297 | no |
| A1BG         | 0.082552037  | 2.186900731  | 0.029081445 | 0.050504094 | no |
| COPZ1        | 0.082550023  | 2.186847023  | 0.029085384 | 0.050506596 | no |
| RBMX2        | -0.082519987 | -2.186045882 | 0.029144197 | 0.050600768 | no |
| PDLIM2       | 0.082519771  | 2.186040111  | 0.029144621 | 0.050600768 | no |
| CFC1B        | -0.082505638 | -2.185663161 | 0.029172329 | 0.050644526 | no |
| IQCJ         | -0.082491198 | -2.185277991 | 0.029200665 | 0.050689366 | no |
| COG8         | -0.082480138 | -2.184983009 | 0.029222382 | 0.050721739 | no |
| RABGGTB      | -0.082479146 | -2.184956532 | 0.029224332 | 0.050721739 | no |
| GABRA5       | -0.082473784 | -2.184813537 | 0.029234865 | 0.050735665 | no |
| HIATL2       | 0.082469021  | 2.184686477  | 0.029244227 | 0.050747556 | no |
| FLJ23867     | -0.082460289 | -2.184453588 | 0.029261393 | 0.050772988 | no |
| POLM         | 0.082455455  | 2.184324648  | 0.029270901 | 0.050785127 | no |
| AMAC1        | -0.08243939  | -2.183896164 | 0.029302517 | 0.050835618 | no |
| CTR9         | 0.08241911   | 2.183355245  | 0.02934247  | 0.050896734 | no |
| MID1IP1      | -0.082418953 | -2.183351056 | 0.02934278  | 0.050896734 | no |
| ART1         | -0.082393867 | -2.182681955 | 0.029392267 | 0.050978198 | no |
| TMEM120A     | 0.082385859  | 2.18246837   | 0.029408079 | 0.051000825 | no |
| DHDPSL       | -0.082384705 | -2.182437591 | 0.029410358 | 0.051000825 | no |
| MAP3K1       | 0.082376186  | 2.182210392  | 0.029427187 | 0.051021456 | no |
| WDR4         | 0.082375547  | 2.18219334   | 0.02942845  | 0.051021456 | no |
| FAM160B2     | -0.082374851 | -2.182174775 | 0.029429826 | 0.051021456 | no |
| LOC100128164 | -0.082371027 | -2.182072786 | 0.029437384 | 0.051030183 | no |
| LRRC37A2     | -0.082351915 | -2.181563028 | 0.029475184 | 0.051091329 | no |
| EIF6         | 0.082347545  | 2.181446485  | 0.029483832 | 0.051101938 | no |
| ADAMTS8      | -0.082337403 | -2.181175984 | 0.029503912 | 0.051132358 | no |
| NDP          | 0.082331948  | 2.18103049   | 0.029514718 | 0.051146701 | no |
| WHAMML1      | -0.082327646 | -2.180915741 | 0.029523242 | 0.051157089 | no |
| CST3         | 0.08230245   | 2.180243732  | 0.029573208 | 0.051239276 | no |
| GNPNAT1      | 0.082289227  | 2.179891053  | 0.029599459 | 0.051280366 | no |
| DOC2B        | -0.082271549 | -2.179419559 | 0.029634586 | 0.051336823 | no |
| TUBB2C       | 0.082240547  | 2.178592719  | 0.029696274 | 0.051439279 | no |
| SIM2         | -0.082215056 | -2.17791284  | 0.02974708  | 0.05152287  | no |
| FBXW8        | -0.082188973 | -2.177217198 | 0.029799142 | 0.051608621 | no |
| WDR88        | -0.08217177  | -2.176758389 | 0.029833522 | 0.051663738 | no |
| TIMP3        | -0.082166807 | -2.176626002 | 0.029843448 | 0.051676502 | no |
| MUC5B        | -0.082161548 | -2.176485765 | 0.029853967 | 0.051690288 | no |
| C12orf29     | -0.082136045 | -2.175805587 | 0.029905028 | 0.051774263 | no |

|           |              |              |             |             |    |
|-----------|--------------|--------------|-------------|-------------|----|
| ANKLE2    | 0.082133547  | 2.175738972  | 0.029910032 | 0.051778494 | no |
| IFNA21    | -0.08212795  | -2.1755897   | 0.02992125  | 0.051793479 | no |
| VPRBP     | -0.082117329 | -2.175306432 | 0.029942547 | 0.051825907 | no |
| ZNF763    | -0.082109237 | -2.17509061  | 0.029958782 | 0.051849568 | no |
| TMEM54    | 0.082106425  | 2.175015622  | 0.029964425 | 0.051854895 | no |
| SLC43A1   | 0.082100903  | 2.174868339  | 0.02997551  | 0.051869639 | no |
| NUP160    | 0.082087016  | 2.174497967  | 0.030003402 | 0.05190998  | no |
| BEND2     | 0.082086739  | 2.174490588  | 0.030003958 | 0.05190998  | no |
| UBE2CBP   | -0.082072923 | -2.174122122 | 0.030031729 | 0.051953307 | no |
| FBP2      | 0.082071724  | 2.174090143  | 0.03003414  | 0.051953307 | no |
| TRMT12    | 0.082036136  | 2.173141017  | 0.030105782 | 0.052072779 | no |
| PCDHGA2   | -0.082021008 | -2.172737559 | 0.030136281 | 0.052117128 | no |
| NEK2      | 0.08202086   | 2.172733625  | 0.030136578 | 0.052117128 | no |
| C1QTNF7   | 0.082018394  | 2.172667853  | 0.030141553 | 0.052121272 | no |
| DHRS11    | -0.082001447 | -2.172215893 | 0.030175754 | 0.052175952 | no |
| PCNXL2    | -0.081999925 | -2.172175295 | 0.030178828 | 0.052176804 | no |
| ACPT      | -0.081992647 | -2.171981189 | 0.030193528 | 0.052197756 | no |
| MMP17     | -0.081978699 | -2.171609207 | 0.030221717 | 0.052240806 | no |
| OLFM2     | -0.081977768 | -2.171584399 | 0.030223598 | 0.052240806 | no |
| XPR1      | 0.08197573   | 2.171530033  | 0.03022772  | 0.052243464 | no |
| LRRIQ4    | 0.081947518  | 2.170777651  | 0.030284814 | 0.052337668 | no |
| C6orf27   | -0.081939347 | -2.17055975  | 0.030301367 | 0.052361798 | no |
| C17orf77  | 0.081926484  | 2.170216693  | 0.030327443 | 0.052402379 | no |
| RAB3B     | -0.081910766 | -2.169797527 | 0.03035933  | 0.052452994 | no |
| C4orf29   | 0.081902332  | 2.169572581  | 0.030376454 | 0.052478095 | no |
| SMPX      | -0.081900985 | -2.169536675 | 0.030379188 | 0.052478334 | no |
| KIAA0748  | -0.081888492 | -2.169203504 | 0.030404568 | 0.05251769  | no |
| C1orf133  | 0.081881616  | 2.169020121  | 0.030418546 | 0.052537345 | no |
| PDE1A     | -0.081880131 | -2.168980515 | 0.030421565 | 0.052538072 | no |
| TMEM30B   | 0.081862239  | 2.168503371  | 0.030457962 | 0.052596436 | no |
| HTRA2     | -0.081858674 | -2.168408313 | 0.030465218 | 0.052604473 | no |
| RNF160    | -0.081847503 | -2.168110387 | 0.030487967 | 0.052632044 | no |
| ABHD4     | -0.081847214 | -2.168102671 | 0.030488557 | 0.052632044 | no |
| RPL30     | -0.081846998 | -2.168096933 | 0.030488995 | 0.052632044 | no |
| GRIA1     | -0.081833262 | -2.167730611 | 0.030516988 | 0.05267587  | no |
| GDNF      | -0.081823252 | -2.167463648 | 0.030537403 | 0.052706608 | no |
| ACER1     | 0.081814747  | 2.167236839  | 0.030554756 | 0.052732058 | no |
| ZNF93     | -0.081802692 | -2.16691535  | 0.030579368 | 0.052770029 | no |
| RPL5      | -0.081793116 | -2.166659996 | 0.030598929 | 0.052799278 | no |
| MPL       | 0.081760284  | 2.165784441  | 0.03066608  | 0.05290581  | no |
| PROKR2    | -0.081759434 | -2.165761761 | 0.030667822 | 0.05290581  | no |
| OR2J2     | 0.081759094  | 2.165752694  | 0.030668518 | 0.05290581  | no |
| ZBED3     | -0.081740623 | -2.165260121 | 0.030706355 | 0.052966562 | no |
| MKL2      | 0.081730976  | 2.165002845  | 0.030726133 | 0.052996157 | no |
| FARP1     | -0.081725696 | -2.164862056 | 0.030736961 | 0.053010311 | no |
| LOC157381 | 0.081713339  | 2.164532527  | 0.030762318 | 0.053049518 | no |
| PHOSPHO2  | 0.081691004  | 2.1639369    | 0.030808196 | 0.053124103 | no |
| MPV17L2   | 0.081677496  | 2.163576699  | 0.030835969 | 0.05316746  | no |
| ARGLU1    | -0.081654263 | -2.162957139 | 0.030883791 | 0.053245372 | no |
| SLC22A12  | -0.081652233 | -2.162902991 | 0.030887973 | 0.053248043 | no |
| HMOX2     | -0.081641293 | -2.162611258 | 0.030910516 | 0.05328236  | no |

|           |              |              |             |             |    |
|-----------|--------------|--------------|-------------|-------------|----|
| LOC222699 | 0.081631396  | 2.162347347  | 0.030930921 | 0.05330945  | no |
| NEK10     | 0.081631113  | 2.162339799  | 0.030931504 | 0.05330945  | no |
| TMEM151A  | -0.081621387 | -2.162080429 | 0.03095157  | 0.053339485 | no |
| KBTBD4    | -0.081609538 | -2.161764463 | 0.030976028 | 0.053377085 | no |
| FBXL18    | -0.081578205 | -2.160928905 | 0.031040789 | 0.05348412  | no |
| INO80E    | -0.081530585 | -2.159659067 | 0.031139431 | 0.053649511 | no |
| CSN3      | 0.081527578  | 2.159578884  | 0.031145669 | 0.053655686 | no |
| PICK1     | 0.081524102  | 2.159486169  | 0.031152883 | 0.053663541 | no |
| ATP2C1    | 0.081517368  | 2.15930661   | 0.031166858 | 0.053683041 | no |
| KLF9      | -0.081507754 | -2.159050237 | 0.031186821 | 0.05371285  | no |
| OR4C6     | 0.081493573  | 2.158672091  | 0.031216286 | 0.053759018 | no |
| CPS1      | -0.08148632  | -2.158478674 | 0.031231367 | 0.053780408 | no |
| KRBA2     | -0.081474721 | -2.158169389 | 0.031255494 | 0.053817372 | no |
| NFYC      | 0.08147084   | 2.158065887  | 0.031263572 | 0.053826697 | no |
| CCDC24    | 0.081458206  | 2.157728991  | 0.031289877 | 0.0538674   | no |
| TTC35     | -0.08145449  | -2.157629914 | 0.031297617 | 0.053876137 | no |
| CDC20B    | 0.081445421  | 2.157388077  | 0.031316516 | 0.05390408  | no |
| DYRK4     | 0.081436764  | 2.157157239  | 0.031334564 | 0.053930555 | no |
| NDUFS5    | 0.081416161  | 2.156607855  | 0.031377555 | 0.053999949 | no |
| TUSC3     | 0.081404205  | 2.156289044  | 0.031402526 | 0.054038324 | no |
| DES       | 0.081383266  | 2.155730695  | 0.0314463   | 0.054109046 | no |
| ELAVL1    | -0.081373596 | -2.155472837 | 0.031466533 | 0.054135746 | no |
| ABCG5     | -0.081373291 | -2.155464694 | 0.031467172 | 0.054135746 | no |
| TNFRSF13C | -0.081365286 | -2.15525126  | 0.031483929 | 0.054159965 | no |
| OVOL2     | -0.081342884 | -2.154653895 | 0.031530868 | 0.054236097 | no |
| RNF24     | 0.081340813  | 2.15459868   | 0.031535209 | 0.054236816 | no |
| WDR76     | 0.081339667  | 2.154568122  | 0.031537612 | 0.054236816 | no |
| VSTM2A    | -0.081337786 | -2.154517959 | 0.031541558 | 0.054236816 | no |
| RBM16     | -0.081337567 | -2.154512124 | 0.031542016 | 0.054236816 | no |
| ABHD5     | 0.081320348  | 2.154052995  | 0.031578145 | 0.054294322 | no |
| BEAN      | 0.081316481  | 2.153949879  | 0.031586264 | 0.054303664 | no |
| MYL5      | 0.081289576  | 2.153232453  | 0.031642802 | 0.054396239 | no |
| ZNF574    | -0.081288289 | -2.153198141 | 0.031645508 | 0.054396266 | no |
| BCL9      | -0.081285668 | -2.153128253 | 0.031651021 | 0.054401117 | no |
| PSMB1     | 0.08128329   | 2.153064847  | 0.031656023 | 0.054405089 | no |
| INCA1     | -0.081275323 | -2.152852416 | 0.031672786 | 0.054429273 | no |
| HMG20B    | 0.0812724    | 2.152774458  | 0.03167894  | 0.054435221 | no |
| CLTC      | 0.081265934  | 2.152602056  | 0.031692553 | 0.054453984 | no |
| C20orf165 | -0.081260333 | -2.152452691 | 0.031704351 | 0.054469626 | no |
| HABP2     | 0.081251365  | 2.152213579  | 0.031723245 | 0.054497457 | no |
| LOC154449 | -0.081244713 | -2.15203622  | 0.031737266 | 0.054516911 | no |
| PAPD5     | -0.081239898 | -2.151907819 | 0.03174742  | 0.05452972  | no |
| HS6ST2    | -0.08122896  | -2.151616158 | 0.031770495 | 0.054564719 | no |
| CLK2P     | 0.08122645   | 2.15154925   | 0.03177579  | 0.054569178 | no |
| C6orf103  | 0.081201907  | 2.150894819  | 0.031827626 | 0.054653554 | no |
| GJB6      | -0.081168806 | -2.150012228 | 0.031897649 | 0.054769143 | no |
| C2orf47   | 0.081157658  | 2.149714961  | 0.031921263 | 0.054805035 | no |
| CCDC74B   | 0.081121158  | 2.148741746  | 0.031998678 | 0.054933282 | no |
| DPY19L2   | -0.081098457 | -2.14813646  | 0.032046907 | 0.055011408 | no |
| MEGF10    | 0.081091056  | 2.147939136  | 0.032062643 | 0.055032912 | no |
| GPRC5C    | 0.081090006  | 2.14791112   | 0.032064878 | 0.055032912 | no |



|            |              |              |             |             |    |
|------------|--------------|--------------|-------------|-------------|----|
| GALNTL4    | -0.081079646 | -2.147634909 | 0.032086918 | 0.055066064 | no |
| DIAPH3     | 0.081051788  | 2.146892107  | 0.032146253 | 0.055159329 | no |
| C6orf120   | 0.081051569  | 2.146886274  | 0.032146719 | 0.055159329 | no |
| NTN3       | -0.081047388 | -2.146774783 | 0.032155634 | 0.055169942 | no |
| LCE1E      | -0.081010132 | -2.145781441 | 0.032235149 | 0.055301676 | no |
| MDM1       | 0.080988135  | 2.145194937  | 0.032282177 | 0.055377657 | no |
| HAO1       | 0.08096343   | 2.144536245  | 0.032335064 | 0.055459782 | no |
| TFDP3      | 0.080963209  | 2.144530344  | 0.032335538 | 0.055459782 | no |
| LSM14A     | 0.080881616  | 2.142354901  | 0.032510736 | 0.055755541 | no |
| REP15      | 0.080866961  | 2.141964169  | 0.03254229  | 0.055804921 | no |
| CRYGS      | 0.080834631  | 2.141102187  | 0.032611992 | 0.055919706 | no |
| OR1N1      | 0.080819066  | 2.140687214  | 0.032645594 | 0.055972576 | no |
| WIT1       | 0.080810141  | 2.140449265  | 0.032664875 | 0.056000885 | no |
| LOC284009  | -0.080806831 | -2.140360996 | 0.032672029 | 0.056008402 | no |
| ZNF382     | -0.080779258 | -2.139625859 | 0.03273167  | 0.056105884 | no |
| ITM2A      | 0.080777351  | 2.139575028  | 0.032735797 | 0.056108202 | no |
| KHDRBS1    | -0.080759235 | -2.139092025 | 0.032775038 | 0.056168858 | no |
| MS4A10     | 0.080758448  | 2.139071052  | 0.032776743 | 0.056168858 | no |
| SALL3      | -0.080752121 | -2.138902369 | 0.032790457 | 0.056187597 | no |
| NCRNA00175 | -0.080730069 | -2.138314445 | 0.032838295 | 0.056264801 | no |
| LOC284688  | 0.080716614  | 2.137955712  | 0.032867514 | 0.056310092 | no |
| GTF3C4     | -0.08071382  | -2.137881222 | 0.032873584 | 0.05631572  | no |
| GGNBP2     | -0.080697114 | -2.137435818 | 0.032909899 | 0.056373154 | no |
| CLRN2      | -0.080688972 | -2.137218746 | 0.03292761  | 0.056398714 | no |
| BSPRY      | -0.08068637  | -2.13714939  | 0.03293327  | 0.056403631 | no |
| FOXO1      | 0.080664781  | 2.136573818  | 0.032980278 | 0.056479354 | no |
| FLJ43663   | -0.080653311 | -2.136268017 | 0.033005276 | 0.056517377 | no |
| ZNF576     | 0.080639883  | 2.135910009  | 0.033034563 | 0.056548936 | no |
| GPR68      | 0.080639815  | 2.135908201  | 0.033034711 | 0.056548936 | no |
| USP32      | -0.080639798 | -2.135907743 | 0.033034749 | 0.056548936 | no |
| CADPS2     | 0.080639731  | 2.135905967  | 0.033034894 | 0.056548936 | no |
| RPL29P2    | -0.080626528 | -2.135553961 | 0.033063712 | 0.056593475 | no |
| ACRC       | -0.080621145 | -2.135410442 | 0.033075468 | 0.056608804 | no |
| KCNC4      | -0.080595131 | -2.134716928 | 0.033132324 | 0.056701315 | no |
| KIF4B      | 0.080589317  | 2.13456192   | 0.033145044 | 0.056718281 | no |
| C17orf58   | 0.080586038  | 2.134474501  | 0.033152219 | 0.056725759 | no |
| IL17B      | 0.080578676  | 2.134278224  | 0.033168334 | 0.05674853  | no |
| IL4        | 0.08054734   | 2.13344281   | 0.033236999 | 0.056861199 | no |
| HSPB2      | 0.080537043  | 2.133168289  | 0.03325959  | 0.056895032 | no |
| HOXA2      | 0.080531436  | 2.133018803  | 0.033271897 | 0.05691127  | no |
| CCDC91     | 0.080525098  | 2.132849841  | 0.033285811 | 0.056928433 | no |
| KIAA0355   | 0.080523986  | 2.132820204  | 0.033288253 | 0.056928433 | no |
| CRYAA      | -0.080523018 | -2.132794403 | 0.033290378 | 0.056928433 | no |
| SNRPB      | 0.080510869  | 2.13247051   | 0.03331707  | 0.056969258 | no |
| EPS8L3     | 0.080498422  | 2.132138681  | 0.033344434 | 0.057011227 | no |
| TDP1       | 0.080467158  | 2.131305208  | 0.033413251 | 0.057121278 | no |
| C1orf56    | -0.080466614 | -2.1312907   | 0.03341445  | 0.057121278 | no |
| CSAG1      | 0.080464168  | 2.131225491  | 0.03341984  | 0.057125661 | no |
| CSRP2      | 0.080443979  | 2.130687266  | 0.033464351 | 0.057196911 | no |
| NCOA3      | 0.080429434  | 2.130299496  | 0.033496452 | 0.057246937 | no |
| CHKB       | 0.080419666  | 2.130039113  | 0.033518022 | 0.05727896  | no |

|            |              |              |             |             |    |
|------------|--------------|--------------|-------------|-------------|----|
| TIPRL      | 0.080407322  | 2.129710031  | 0.0335453   | 0.05732073  | no |
| CCNI       | -0.080403302 | -2.129602863 | 0.033554187 | 0.057331071 | no |
| AKR1B15    | 0.080362411  | 2.128512744  | 0.033644705 | 0.057480873 | no |
| TROVE2     | -0.080320794 | -2.127403306 | 0.033737042 | 0.057633757 | no |
| CDC42SE2   | 0.080312305  | 2.127177012  | 0.033755903 | 0.057661105 | no |
| CCDC9      | 0.080305588  | 2.126997949  | 0.033770833 | 0.057681736 | no |
| HBB        | 0.080289466  | 2.12656816   | 0.033806693 | 0.057733146 | no |
| SIN3A      | -0.080287825 | -2.126524417 | 0.033810344 | 0.057733146 | no |
| HIST1H2BE  | 0.08028781   | 2.126524026  | 0.033810377 | 0.057733146 | no |
| IL1RAPL2   | -0.080286922 | -2.12650034  | 0.033812354 | 0.057733146 | no |
| PLA2G10    | -0.080263931 | -2.125887441 | 0.033863556 | 0.057815687 | no |
| MCM3AP     | -0.080256853 | -2.125698757 | 0.033879332 | 0.057833561 | no |
| SCEL       | -0.080256667 | -2.125693807 | 0.033879746 | 0.057833561 | no |
| IWS1       | -0.080244321 | -2.125364686 | 0.033907279 | 0.057875675 | no |
| RAB30      | -0.080225809 | -2.124871194 | 0.033948599 | 0.057941312 | no |
| SMG1       | -0.08022142  | -2.124754188 | 0.033958402 | 0.057953151 | no |
| USP1       | 0.08019692   | 2.124101095  | 0.034013166 | 0.05804171  | no |
| ARL14      | 0.080174692  | 2.123508544  | 0.034062918 | 0.058121704 | no |
| P2RX1      | 0.080173394  | 2.123473947  | 0.034065825 | 0.058121759 | no |
| HN1        | -0.080166959 | -2.123302398 | 0.034080241 | 0.058141449 | no |
| PPP1R3G    | 0.080141286  | 2.122618042  | 0.034137804 | 0.058234738 | no |
| PNLIP      | 0.080135553  | 2.122465205  | 0.034150671 | 0.058251773 | no |
| CDKL2      | -0.08012818  | -2.122268652 | 0.034167224 | 0.058275092 | no |
| MPHOSPH6   | -0.080111573 | -2.121825964 | 0.034204532 | 0.058333802 | no |
| SPRR4      | -0.080093932 | -2.12135573  | 0.034244199 | 0.058396526 | no |
| ADAL       | -0.080090228 | -2.12125697  | 0.034252535 | 0.058405815 | no |
| TEPP       | 0.080088526  | 2.12121162   | 0.034256363 | 0.058407417 | no |
| RAB21      | 0.080078904  | 2.120955113  | 0.034278025 | 0.058439422 | no |
| RPS28      | -0.080055755 | -2.120338047 | 0.034330182 | 0.058523408 | no |
| TIMM50     | -0.080048449 | -2.120143282 | 0.034346658 | 0.058544064 | no |
| C9orf53    | 0.080047814  | 2.120126357  | 0.03434809  | 0.058544064 | no |
| HERC2P4    | -0.080039438 | -2.119903083 | 0.034366988 | 0.058571336 | no |
| ZNF767     | -0.08002421  | -2.119497175 | 0.034401365 | 0.058624984 | no |
| ELOVL7     | 0.080005958  | 2.119010632  | 0.034442611 | 0.058690326 | no |
| BUB1       | 0.079988936  | 2.118556895  | 0.034481114 | 0.058750983 | no |
| DDX53      | 0.07991969   | 2.11671107   | 0.034638126 | 0.059013536 | no |
| FAM75C1    | -0.07991083  | -2.116474896 | 0.03465826  | 0.059042863 | no |
| GAPDHS     | -0.079873262 | -2.115473507 | 0.034743739 | 0.059183497 | no |
| SNORD115-7 | -0.079847697 | -2.114792057 | 0.034802012 | 0.059277765 | no |
| MOBKL1A    | 0.079837202  | 2.114512327  | 0.034825956 | 0.059313553 | no |
| HLTF       | -0.079833577 | -2.11441569  | 0.034834232 | 0.059322649 | no |
| C10orf68   | -0.079825112 | -2.114190067 | 0.034853559 | 0.059350565 | no |
| TMC2       | -0.079819804 | -2.114048562 | 0.034865685 | 0.059366214 | no |
| KDM1A      | -0.07980347  | -2.113613192 | 0.034903017 | 0.059424774 | no |
| IFNA14     | 0.079798492  | 2.113480508  | 0.034914401 | 0.059439151 | no |
| TP53BP1    | -0.079741021 | -2.111948616 | 0.035046065 | 0.059658275 | no |
| CCNG2      | -0.079712836 | -2.111197377 | 0.035110788 | 0.059760441 | no |
| IFNG       | 0.079712312  | 2.111183393  | 0.035111993 | 0.059760441 | no |
| WDR74      | -0.07970671  | -2.111034082 | 0.03512487  | 0.059777325 | no |
| RBCK1      | 0.079693604  | 2.110684746  | 0.035155012 | 0.059823586 | no |
| RAD18      | 0.079690836  | 2.110610962  | 0.035161381 | 0.059829389 | no |

|              |              |              |             |             |    |
|--------------|--------------|--------------|-------------|-------------|----|
| LOC100125556 | 0.079669862  | 2.110051926  | 0.035209671 | 0.059906515 | no |
| LZTS2        | -0.079665507 | -2.109935854 | 0.035219704 | 0.059918544 | no |
| TRPM5        | -0.079660583 | -2.109804597 | 0.035231053 | 0.059932808 | no |
| EXTL1        | -0.079644942 | -2.1093877   | 0.03526712  | 0.059989116 | no |
| PGBD1        | -0.079616412 | -2.108627281 | 0.035332988 | 0.060096101 | no |
| EIF4EBP1     | 0.07959833   | 2.108145307  | 0.035374791 | 0.06016214  | no |
| DHRS4L2      | -0.079593124 | -2.108006566 | 0.035386832 | 0.060177557 | no |
| C1orf94      | -0.079584393 | -2.107773845 | 0.035407038 | 0.060206854 | no |
| GRB14        | 0.079578615  | 2.107619854  | 0.035420414 | 0.060224533 | no |
| NR1H2        | 0.079576097  | 2.107552732  | 0.035426245 | 0.060229383 | no |
| FAM20B       | -0.079474808 | -2.10485305  | 0.035661472 | 0.060624203 | no |
| APOBEC2      | -0.079469827 | -2.104720303 | 0.035673073 | 0.060638825 | no |
| SETD1B       | -0.079461695 | -2.104503547 | 0.035692022 | 0.060665936 | no |
| APLP1        | -0.079459938 | -2.104456716 | 0.035696117 | 0.060667796 | no |
| RASSF6       | 0.079455116  | 2.104328215  | 0.035707356 | 0.060681796 | no |
| HAUS3        | -0.079449592 | -2.104180965 | 0.035720239 | 0.060698587 | no |
| RPA1         | 0.079368796  | 2.102027551  | 0.035909091 | 0.06101437  | no |
| FAM71E2      | 0.079354517  | 2.101647006  | 0.035942552 | 0.061066094 | no |
| ZNF623       | -0.079349349 | -2.101509266 | 0.035954671 | 0.061076669 | no |
| GTF2A1       | -0.079349286 | -2.101507591 | 0.035954818 | 0.061076669 | no |
| FM03         | 0.079331513  | 2.101033905  | 0.035996519 | 0.06114237  | no |
| RGPD6        | -0.079329859 | -2.100989803 | 0.036000404 | 0.061143831 | no |
| METTL12      | -0.079324201 | -2.100839026 | 0.036013688 | 0.061161254 | no |
| BRI3BP       | 0.079312795  | 2.100535016  | 0.036040484 | 0.061201621 | no |
| CTPS         | 0.079311148  | 2.100491123  | 0.036044354 | 0.061203053 | no |
| B3GALT5      | 0.079308029  | 2.100408007  | 0.036051684 | 0.061210358 | no |
| SYCE1L       | 0.079289944  | 2.099926004  | 0.036094215 | 0.061277424 | no |
| HCG4P6       | -0.079283061 | -2.099742572 | 0.036110412 | 0.061299775 | no |
| NUDT14       | 0.079276559  | 2.099569258  | 0.036125722 | 0.061320615 | no |
| DID01        | -0.079268655 | -2.099358612 | 0.036144336 | 0.061347061 | no |
| PRMT3        | -0.079253585 | -2.098956969 | 0.036179852 | 0.061402186 | no |
| CGN          | -0.079244206 | -2.098707006 | 0.03620197  | 0.061434567 | no |
| PTPRK        | -0.079239527 | -2.098582312 | 0.036213008 | 0.06144814  | no |
| MRS2         | 0.079235911  | 2.098485942  | 0.036221541 | 0.061457461 | no |
| AQP10        | 0.079227708  | 2.098267325  | 0.036240903 | 0.061485154 | no |
| ZNF772       | -0.079213422 | -2.097886584 | 0.036274647 | 0.061537238 | no |
| RHOXF1       | -0.079205661 | -2.097679739 | 0.036292989 | 0.061558411 | no |
| SERPINC1     | 0.079205426  | 2.097673491  | 0.036293544 | 0.061558411 | no |
| PITPNA       | -0.079204277 | -2.097642852 | 0.036296261 | 0.061558411 | no |
| TUBA3D       | -0.079190796 | -2.097283574 | 0.036328143 | 0.061607314 | no |
| FAM153B      | -0.079184707 | -2.097121302 | 0.036342551 | 0.061626578 | no |
| FBXL20       | -0.079166774 | -2.09664337  | 0.036385013 | 0.061693408 | no |
| RXRA         | -0.079125535 | -2.095544321 | 0.036482821 | 0.06185406  | no |
| DYNC2LI1     | 0.079121769  | 2.095443948  | 0.036491764 | 0.061864036 | no |
| PRKAG2       | -0.079113463 | -2.095222596 | 0.036511494 | 0.061892294 | no |
| LOC100130238 | -0.07910939  | -2.095114027 | 0.036521175 | 0.061903514 | no |
| OPN1MW       | 0.079107103  | 2.095053094  | 0.036526609 | 0.061907534 | no |
| SMAD3        | -0.079089046 | -2.094571855 | 0.03656955  | 0.061975119 | no |
| SGCD         | -0.079069189 | -2.094042671 | 0.036616819 | 0.062043802 | no |
| JPH2         | 0.079068446  | 2.094022852  | 0.036618591 | 0.062043802 | no |
| STXBP4       | 0.079068154  | 2.094015092  | 0.036619284 | 0.062043802 | no |

|           |              |              |             |             |    |
|-----------|--------------|--------------|-------------|-------------|----|
| RAB1B     | 0.07906511   | 2.093933966  | 0.036626536 | 0.062050888 | no |
| C6orf164  | -0.079032625 | -2.09306822  | 0.036703998 | 0.062176912 | no |
| OR10P1    | 0.079016602  | 2.092641211  | 0.036742257 | 0.062236507 | no |
| KCNV2     | -0.079013962 | -2.092570863 | 0.036748563 | 0.062241974 | no |
| RAB1F     | 0.078990026  | 2.091932979  | 0.036805786 | 0.062333672 | no |
| ZNF619    | -0.078979731 | -2.091658602 | 0.036830423 | 0.062370173 | no |
| C21orf49  | -0.078971947 | -2.091451158 | 0.03684906  | 0.062396506 | no |
| BCL2L10   | -0.078938589 | -2.090562203 | 0.036929013 | 0.062526655 | no |
| RAB11FIP5 | 0.078874994  | 2.088867431  | 0.037081852 | 0.062780179 | no |
| GTPBP5    | -0.078853308 | -2.088289526 | 0.037134093 | 0.062863359 | no |
| NPRL2     | -0.078837721 | -2.087874145 | 0.037171681 | 0.062921721 | no |
| CA9       | 0.078833243  | 2.087754804  | 0.037182486 | 0.062934742 | no |
| CSAD      | -0.078815853 | -2.087291382 | 0.037224469 | 0.062995728 | no |
| PRCC      | -0.078815737 | -2.087288304 | 0.037224748 | 0.062995728 | no |
| RGMA      | -0.078794884 | -2.086732603 | 0.037275145 | 0.063075736 | no |
| UBXN7     | -0.078791307 | -2.086637279 | 0.037283796 | 0.063085095 | no |
| NOMO2     | -0.07877566  | -2.086220305 | 0.037321658 | 0.063143873 | no |
| ZNF404    | -0.078766538 | -2.085977224 | 0.037343745 | 0.063175955 | no |
| MAP1LC3B2 | 0.078756055  | 2.08569786   | 0.037369143 | 0.063210412 | no |
| PKHD1     | 0.078754887  | 2.08566675   | 0.037371972 | 0.063210412 | no |
| GAST      | 0.07875426   | 2.085650033  | 0.037373492 | 0.063210412 | no |
| C11orf1   | -0.078748728 | -2.085502618 | 0.037386901 | 0.063227802 | no |
| PRKAG1    | 0.078733128  | 2.085086895  | 0.037424738 | 0.063281915 | no |
| RACGAP1P  | -0.078731762 | -2.085050504 | 0.037428052 | 0.063281915 | no |
| HCRTR2    | -0.078731665 | -2.085047905 | 0.037428289 | 0.063281915 | no |
| NMBR      | -0.078726676 | -2.084914977 | 0.037440395 | 0.063297091 | no |
| EML1      | 0.07871301   | 2.084550806  | 0.037473579 | 0.063347894 | no |
| DDX11     | -0.078708429 | -2.084428728 | 0.037484708 | 0.06336141  | no |
| CCND2     | -0.078700528 | -2.084218161 | 0.037503911 | 0.063388571 | no |
| B3GALTL   | 0.07869432   | 2.08405274   | 0.037519004 | 0.063408778 | no |
| SH3GL1    | -0.07868508  | -2.083806514 | 0.037541477 | 0.063441457 | no |
| EXOC6B    | -0.078679643 | -2.083661631 | 0.037554707 | 0.063457667 | no |
| SGCA      | 0.078678558  | 2.083632721  | 0.037557347 | 0.063457667 | no |
| MCHR1     | 0.078668177  | 2.083356083  | 0.037582619 | 0.063495061 | no |
| FBXO47    | 0.078666557  | 2.083312926  | 0.037586563 | 0.063496418 | no |
| PCSK4     | -0.078659434 | -2.083123119 | 0.037603913 | 0.06352042  | no |
| ROMO1     | 0.078634181  | 2.082450176  | 0.03766548  | 0.063619104 | no |
| HAS2AS    | 0.07862535   | 2.082214855  | 0.03768703  | 0.063650185 | no |
| ZDHHC23   | 0.078611069  | 2.081834294  | 0.037721902 | 0.063700024 | no |
| GPR149    | -0.078610685 | -2.081824063 | 0.03772284  | 0.063700024 | no |
| KCNC3     | -0.078570321 | -2.080748469 | 0.037821552 | 0.063861378 | no |
| MUM1L1    | -0.078544042 | -2.080048215 | 0.037885936 | 0.063961076 | no |
| DHX40     | 0.078543638  | 2.080037464  | 0.037886925 | 0.063961076 | no |
| FGF22     | -0.078538221 | -2.079893096 | 0.037900211 | 0.063978163 | no |
| CP110     | -0.078534446 | -2.079792528 | 0.037909468 | 0.063988447 | no |
| ZNF334    | -0.0785322   | -2.079732667 | 0.037914979 | 0.063992407 | no |
| OR2T4     | -0.078511769 | -2.07918825  | 0.037965132 | 0.064071706 | no |
| YOD1      | -0.078507022 | -2.079061749 | 0.037976793 | 0.064086037 | no |
| FAM100B   | 0.078501816  | 2.078923033  | 0.037989585 | 0.064102272 | no |
| PPP1R1C   | 0.078498469  | 2.078833842  | 0.037997811 | 0.064110802 | no |
| CHP2      | -0.078494905 | -2.078738874 | 0.038006572 | 0.064119446 | no |

|              |              |              |             |             |    |
|--------------|--------------|--------------|-------------|-------------|----|
| ANXA3        | -0.078493805 | -2.078709551 | 0.038009277 | 0.064119446 | no |
| CDK2AP2      | 0.078478061  | 2.078290046  | 0.038048    | 0.064179414 | no |
| RAB31        | -0.078459474 | -2.077794764 | 0.03809376  | 0.064251242 | no |
| ATP5B        | -0.07843187  | -2.077059214 | 0.038161806 | 0.064360644 | no |
| SUMF2        | 0.07842297   | 2.076822056  | 0.038183768 | 0.064388144 | no |
| NRTN         | -0.078422681 | -2.076814352 | 0.038184481 | 0.064388144 | no |
| COMP         | 0.078414453  | 2.07659513   | 0.038204792 | 0.06441702  | no |
| RNF138P1     | 0.078411419  | 2.076514284  | 0.038212285 | 0.06442428  | no |
| LOC727896    | -0.078408717 | -2.076442285 | 0.038218958 | 0.064430159 | no |
| C10orf120    | -0.078397036 | -2.076131016 | 0.038247822 | 0.064473442 | no |
| RPTN         | 0.078391947  | 2.075995435  | 0.0382604   | 0.064489268 | no |
| ZNF471       | -0.078389365 | -2.075926616 | 0.038266786 | 0.064494654 | no |
| ARRDC1       | 0.078378812  | 2.075645415  | 0.038292888 | 0.064533268 | no |
| MIIP         | -0.078367409 | -2.075341583 | 0.038321108 | 0.064575443 | no |
| PSTPIP1      | -0.078360282 | -2.075151673 | 0.038338756 | 0.064599798 | no |
| ZC3H14       | -0.078340972 | -2.074637143 | 0.038386605 | 0.064675032 | no |
| ZMYM5        | 0.078315002  | 2.073945162  | 0.038451037 | 0.06477819  | no |
| MEIS1        | 0.078293238  | 2.073365252  | 0.038505104 | 0.064863872 | no |
| GGNBP1       | -0.078279561 | -2.073000814 | 0.038539115 | 0.064915491 | no |
| CAPRIN2      | 0.078278333  | 2.072968117  | 0.038542168 | 0.064915491 | no |
| HEY2         | -0.078267313 | -2.072674474 | 0.038569593 | 0.06495627  | no |
| GNA13        | 0.078264957  | 2.072611701  | 0.038575457 | 0.064960736 | no |
| PPP3R1       | -0.078253179 | -2.07229787  | 0.03860479  | 0.065004717 | no |
| LOC100131551 | 0.078245281  | 2.072087429  | 0.038624469 | 0.065032438 | no |
| SUN1         | 0.078229087  | 2.071655951  | 0.038664846 | 0.065095    | no |
| CRYBG3       | 0.07822745   | 2.071612318  | 0.038668931 | 0.065096457 | no |
| OR4N2        | -0.078216538 | -2.071321571 | 0.038696161 | 0.065136643 | no |
| CACNA1H      | -0.078215302 | -2.071288642 | 0.038699246 | 0.065136643 | no |
| TMED6        | 0.078204603  | 2.071003568  | 0.038725963 | 0.065176185 | no |
| ERLIN2       | 0.078185902  | 2.070505294  | 0.038772698 | 0.065249409 | no |
| MCM3         | 0.078177963  | 2.070293751  | 0.038792553 | 0.06527739  | no |
| CAPN12       | 0.078176428  | 2.070252845  | 0.038796394 | 0.06527842  | no |
| TOMM6        | 0.078166016  | 2.069975435  | 0.038822447 | 0.065316821 | no |
| ESRRG        | -0.078116944 | -2.068667938 | 0.038945445 | 0.065518306 | no |
| HSPA14       | -0.078085835 | -2.067839046 | 0.039023591 | 0.06564431  | no |
| EIF2B1       | 0.078066579  | 2.067325999  | 0.039072027 | 0.065715418 | no |
| SYNPO2L      | -0.078066445 | -2.067322434 | 0.039072363 | 0.065715418 | no |
| TSEN34       | 0.078044562  | 2.066739383  | 0.039127471 | 0.065802629 | no |
| MCART1       | 0.078024809  | 2.066213085  | 0.039177271 | 0.0658809   | no |
| HSPA6        | 0.077991398  | 2.065322906  | 0.039261625 | 0.06601726  | no |
| C5orf24      | -0.077977822 | -2.06496118  | 0.039295947 | 0.066069476 | no |
| CLPS         | 0.077967962  | 2.064698482  | 0.039320888 | 0.066103933 | no |
| TRIM72       | -0.077967135 | -2.064676461 | 0.03932298  | 0.066103933 | no |
| FOXG1        | -0.077954669 | -2.064344325 | 0.039354535 | 0.066151479 | no |
| NEBL         | -0.077946517 | -2.06412712  | 0.039375182 | 0.066180683 | no |
| WDHD1        | 0.077938782  | 2.063921047  | 0.03939478  | 0.066208119 | no |
| IFIT5        | -0.077921969 | -2.063473092 | 0.03943741  | 0.066274255 | no |
| C15orf40     | 0.07790575   | 2.063040949  | 0.039478572 | 0.066337914 | no |
| FNBP1L       | 0.077902407  | 2.062951901  | 0.039487059 | 0.06634666  | no |
| SLC39A2      | 0.077900953  | 2.062913145  | 0.039490753 | 0.066347352 | no |
| ALOX12P2     | 0.077886479  | 2.062527528  | 0.039527524 | 0.066403613 | no |

|           |              |              |             |             |    |
|-----------|--------------|--------------|-------------|-------------|----|
| TNRC18    | -0.077881434 | -2.0623931   | 0.039540349 | 0.06641964  | no |
| C14orf19  | 0.077879037  | 2.062329246  | 0.039546443 | 0.066423096 | no |
| PPIL2     | -0.07787804  | -2.062302681 | 0.039548978 | 0.066423096 | no |
| B3GALNT1  | 0.077872961  | 2.062167376  | 0.039561893 | 0.066439268 | no |
| SFRS12IP1 | 0.077857137  | 2.061745769  | 0.039602159 | 0.066497464 | no |
| CDKL5     | -0.077856758 | -2.061735668 | 0.039603124 | 0.066497464 | no |
| SLC4A9    | -0.077847609 | -2.061491926 | 0.039626419 | 0.066531054 | no |
| PIN1L     | -0.077831736 | -2.061069037 | 0.039666864 | 0.066593428 | no |
| TMED1     | 0.077829066  | 2.060997884  | 0.039673672 | 0.066599328 | no |
| CCDC104   | -0.077802777 | -2.060297501 | 0.039740743 | 0.06670638  | no |
| BET3L     | 0.077792258  | 2.060017243  | 0.039767608 | 0.066745933 | no |
| FAM55B    | -0.077711632 | -2.057869196 | 0.039974032 | 0.067086824 | no |
| AN07      | 0.077703955  | 2.057664681  | 0.039993733 | 0.067114317 | no |
| GPR87     | 0.077668862  | 2.056729738  | 0.040083901 | 0.067260047 | no |
| NDUFA2    | 0.077655191  | 2.056365531  | 0.040119073 | 0.067313478 | no |
| SLC6A18   | -0.077633717 | -2.05579343  | 0.040174374 | 0.067400671 | no |
| PDE6D     | -0.077632126 | -2.055751034 | 0.040178475 | 0.067401958 | no |
| PRSS50    | -0.077628229 | -2.055647221 | 0.040188517 | 0.067413212 | no |
| BEGAIN    | -0.077623686 | -2.055526181 | 0.040200229 | 0.067427263 | no |
| KIAA0319  | -0.077618703 | -2.055393447 | 0.040213076 | 0.067443216 | no |
| PHF13     | 0.077616448  | 2.055333372  | 0.040218892 | 0.067447375 | no |
| C1orf92   | 0.077611046  | 2.05518944   | 0.040232828 | 0.06746515  | no |
| BAG2      | 0.077602684  | 2.054966684  | 0.040254404 | 0.067495733 | no |
| C9orf9    | 0.077589732  | 2.054621621  | 0.040287847 | 0.067546206 | no |
| PXT1      | -0.077585279 | -2.054502998 | 0.040299349 | 0.067559888 | no |
| C17orf59  | -0.077576921 | -2.054280339 | 0.040320947 | 0.06759049  | no |
| LIPF      | 0.077563879  | 2.053932864  | 0.040354671 | 0.067641414 | no |
| PLCB3     | -0.077556904 | -2.053747053 | 0.040372714 | 0.067666048 | no |
| ZNF473    | 0.077555393  | 2.053706796  | 0.040376624 | 0.067666992 | no |
| ITPKB     | 0.077540744  | 2.05331655   | 0.040414546 | 0.067723812 | no |
| PLIN1     | -0.077539709 | -2.053288957 | 0.040417228 | 0.067723812 | no |
| C1orf128  | -0.07752803  | -2.052977821 | 0.040447485 | 0.067768895 | no |
| ZNF430    | -0.077509443 | -2.052482656 | 0.040495678 | 0.06784402  | no |
| PRSS22    | 0.077497186  | 2.052156125  | 0.040527486 | 0.067891682 | no |
| STOML2    | 0.077467159  | 2.051356196  | 0.040605496 | 0.068016729 | no |
| ZNF813    | 0.077464009  | 2.051272298  | 0.040613685 | 0.068024811 | no |
| ZNF670    | -0.077455737 | -2.051051935 | 0.040635202 | 0.068055211 | no |
| TMEM150C  | 0.077446625  | 2.050809174  | 0.040658916 | 0.068089287 | no |
| CCDC75    | -0.077440025 | -2.050633349 | 0.040676099 | 0.068109037 | no |
| GRIN3B    | 0.077439507  | 2.050619561  | 0.040677447 | 0.068109037 | no |
| C12orf73  | -0.077432441 | -2.050431309 | 0.040695851 | 0.06813421  | no |
| RHBDL2    | 0.077430841  | 2.050388702  | 0.040700018 | 0.068135544 | no |
| LOC730101 | -0.077409628 | -2.049823584 | 0.040755315 | 0.068222467 | no |
| GOLGA6L6  | -0.077379285 | -2.049015247 | 0.040834522 | 0.068349398 | no |
| C3orf20   | -0.077369228 | -2.048747344 | 0.040860802 | 0.068387724 | no |
| PCDHA4    | -0.077322958 | -2.047514739 | 0.040981901 | 0.068584725 | no |
| TINF2     | 0.077314899  | 2.047300028  | 0.041003026 | 0.0686144   | no |
| PIP5K1C   | -0.077312434 | -2.047234367 | 0.041009488 | 0.068619535 | no |
| CETN4P    | 0.077273952  | 2.046209236  | 0.041110493 | 0.068782849 | no |
| MAPK15    | 0.077259149  | 2.045814921  | 0.0411494   | 0.068842248 | no |
| RAD51     | 0.07724624   | 2.04547104   | 0.041183357 | 0.068893356 | no |

|            |              |              |             |             |    |
|------------|--------------|--------------|-------------|-------------|----|
| NT5C3L     | -0.077229694 | -2.045030256 | 0.041226917 | 0.06896052  | no |
| NCRNA00202 | -0.077219077 | -2.044747443 | 0.041254886 | 0.069001595 | no |
| CTRC       | 0.077195135  | 2.044109661  | 0.04131802  | 0.069101474 | no |
| OOEP       | 0.07718418   | 2.043817835  | 0.041346935 | 0.069139269 | no |
| USP39      | 0.077183982  | 2.043812557  | 0.041347458 | 0.069139269 | no |
| KCTD19     | 0.077168498  | 2.043400103  | 0.041388355 | 0.069201932 | no |
| FAM66A     | -0.077114316 | -2.041956791 | 0.041531737 | 0.06943324  | no |
| MOS        | -0.077113627 | -2.041938421 | 0.041533565 | 0.06943324  | no |
| C1orf25    | 0.077102009  | 2.041628957  | 0.041564363 | 0.069478983 | no |
| ITGA2B     | -0.077096359 | -2.041478447 | 0.04157935  | 0.069498288 | no |
| ANK2       | -0.077087563 | -2.041244151 | 0.041602688 | 0.069531548 | no |
| KLK7       | -0.077074072 | -2.040884756 | 0.041638508 | 0.069585664 | no |
| ADAMTS5    | -0.077058428 | -2.040468052 | 0.041680073 | 0.06964937  | no |
| HIST1H2AG  | 0.077026028  | 2.039604987  | 0.041766274 | 0.069787647 | no |
| BCL11A     | -0.07702351  | -2.039537906 | 0.04177298  | 0.069793084 | no |
| CDK11B     | -0.077013926 | -2.039282617 | 0.04179851  | 0.069829968 | no |
| RDBP       | -0.076997343 | -2.038840887 | 0.041842716 | 0.069898045 | no |
| IL17REL    | 0.076989458  | 2.038630853  | 0.041863749 | 0.069927403 | no |
| PGAP3      | -0.076984661 | -2.038503094 | 0.041876548 | 0.069940372 | no |
| KLHL1      | -0.076983011 | -2.03845914  | 0.041880952 | 0.069940372 | no |
| CUTA       | -0.076982659 | -2.038449757 | 0.041881892 | 0.069940372 | no |
| C12orf75   | 0.076971963  | 2.038164845  | 0.041910448 | 0.069982279 | no |
| CEACAM19   | -0.076967399 | -2.038043273 | 0.041922638 | 0.069993369 | no |
| TK2        | 0.076966884  | 2.038029559  | 0.041924013 | 0.069993369 | no |
| STK32A     | -0.076956582 | -2.037755127 | 0.041951542 | 0.070029852 | no |
| EMG1       | 0.076956114  | 2.037742662  | 0.041952793 | 0.070029852 | no |
| DSCR3      | 0.07695131   | 2.037614706  | 0.041965634 | 0.070045504 | no |
| ENPP4      | 0.076932132  | 2.037103879  | 0.042016932 | 0.070125337 | no |
| RNASEH1    | 0.076918579  | 2.036742844  | 0.04205322  | 0.070180108 | no |
| ALDH7A1    | -0.076915825 | -2.036669497 | 0.042060595 | 0.070186622 | no |
| ZNF566     | -0.076900147 | -2.036251886 | 0.042102609 | 0.070248823 | no |
| FERMT2     | 0.076899322  | 2.036229925  | 0.042104819 | 0.070248823 | no |
| DACT1      | 0.076895498  | 2.036128059  | 0.042115073 | 0.070260133 | no |
| MAGEC3     | -0.076892573 | -2.036050149 | 0.042122917 | 0.070267421 | no |
| MRPS34     | -0.076879652 | -2.035705959 | 0.042157585 | 0.070319451 | no |
| DEFA1B     | 0.076862151  | 2.035239792  | 0.042204578 | 0.070392027 | no |
| CLDN20     | 0.076847187  | 2.034841231  | 0.042244791 | 0.070449277 | no |
| LOC90834   | -0.076846785 | -2.034830521 | 0.042245872 | 0.070449277 | no |
| AMPD2      | -0.076839731 | -2.034642623 | 0.042264841 | 0.070475098 | no |
| SOLH       | 0.076825942  | 2.034275342  | 0.042301941 | 0.070531144 | no |
| OR56B4     | 0.076820695  | 2.034135574  | 0.042316067 | 0.070548878 | no |
| ORAOV1     | -0.076811361 | -2.033886951 | 0.042341204 | 0.070584966 | no |
| DALRD3     | 0.076790156  | 2.033322136  | 0.042398357 | 0.070674415 | no |
| NOL12      | -0.076768267 | -2.032739087 | 0.042457423 | 0.070767039 | no |
| POLR2A     | -0.076758447 | -2.032477539 | 0.042483942 | 0.070805403 | no |
| ART5       | 0.076750296  | 2.032260421  | 0.042505967 | 0.0708293   | no |
| PRDM6      | 0.076750276  | 2.0322599    | 0.04250602  | 0.0708293   | no |
| C16orf68   | -0.076749251 | -2.032232596 | 0.042508791 | 0.0708293   | no |
| FAM184A    | -0.076734391 | -2.03183677  | 0.042548971 | 0.070890407 | no |
| PDXDC2     | -0.076716085 | -2.031349183 | 0.04259851  | 0.070967096 | no |
| CHIC2      | 0.076712228  | 2.031246471  | 0.042608952 | 0.070978643 | no |

|           |              |              |             |             |    |
|-----------|--------------|--------------|-------------|-------------|----|
| ISOC2     | 0.076709475  | 2.03117314   | 0.042616408 | 0.070985216 | no |
| SRR       | -0.076696018 | -2.030814684 | 0.042652872 | 0.0710401   | no |
| CLEC3B    | 0.076693596  | 2.030750183  | 0.042659436 | 0.07104518  | no |
| ATAD2B    | -0.076682689 | -2.030459665 | 0.042689012 | 0.07108858  | no |
| TIMM13    | -0.076670991 | -2.030148083 | 0.042720752 | 0.071135576 | no |
| PREP      | 0.076646058  | 2.029484001  | 0.042788466 | 0.071242461 | no |
| LSM12     | 0.076639013  | 2.029296356  | 0.042807616 | 0.071268477 | no |
| TRPC5     | -0.076612583 | -2.028592387 | 0.042879524 | 0.071382315 | no |
| MIS12     | 0.076603575  | 2.028352459  | 0.042904055 | 0.071417273 | no |
| KCNK15    | 0.076590668  | 2.028008687  | 0.042939225 | 0.07146993  | no |
| FAM89A    | 0.076571055  | 2.027486309  | 0.042992713 | 0.071553068 | no |
| PGPEP1L   | -0.076567211 | -2.027383922 | 0.043003203 | 0.071564636 | no |
| PIGQ      | -0.076557182 | -2.027116799 | 0.043030582 | 0.071604306 | no |
| SNX4      | 0.076553643  | 2.027022543  | 0.043040247 | 0.071614493 | no |
| ZNF557    | 0.076551647  | 2.026969375  | 0.043045699 | 0.071617672 | no |
| EFCAB6    | 0.076546054  | 2.026820414  | 0.043060978 | 0.071637197 | no |
| CYLC1     | 0.076518622  | 2.026089783  | 0.043135985 | 0.071756076 | no |
| PRR5L     | 0.076496197  | 2.02549251   | 0.043197384 | 0.071852301 | no |
| OTOS      | 0.076486934  | 2.025245781  | 0.043222769 | 0.071888611 | no |
| JUND      | -0.076478825 | -2.025029812 | 0.043245    | 0.071919668 | no |
| C22orf30  | -0.076454337 | -2.0243776   | 0.043312194 | 0.072025492 | no |
| FNDC4     | 0.076451361  | 2.024298332  | 0.043320366 | 0.072033157 | no |
| FRMPD2L1  | -0.076430365 | -2.023739131 | 0.043378057 | 0.072123154 | no |
| SPINK6    | 0.076423752  | 2.023563001  | 0.043396241 | 0.072147455 | no |
| NDUFA9    | 0.076414379  | 2.023313361  | 0.043422026 | 0.072184387 | no |
| SEC1      | -0.076398221 | -2.022883024 | 0.043466505 | 0.072249935 | no |
| EIF1B     | -0.076397459 | -2.022862737 | 0.043468602 | 0.072249935 | no |
| PKP2      | 0.076381316  | 2.022432785  | 0.043513082 | 0.072317919 | no |
| NDUFA3    | 0.076371245  | 2.022164553  | 0.04354085  | 0.072358122 | no |
| C6orf146  | -0.076367485 | -2.022064405 | 0.043551222 | 0.07236941  | no |
| ATP4A     | -0.076364166 | -2.021976014 | 0.043560378 | 0.072378675 | no |
| LOC388789 | 0.076361222  | 2.02189762   | 0.0435685   | 0.072386221 | no |
| RNF214    | -0.076310464 | -2.02054575  | 0.043708755 | 0.072613279 | no |
| FER1L5    | 0.076306811  | 2.020448474  | 0.043718862 | 0.072624103 | no |
| FAM63A    | -0.076299011 | -2.020240724 | 0.043740454 | 0.072649255 | no |
| NUMBL     | 0.076298745  | 2.020233644  | 0.04374119  | 0.072649255 | no |
| LOC646627 | -0.076292955 | -2.02007944  | 0.043757223 | 0.072669914 | no |
| C6orf125  | -0.076290779 | -2.020021487 | 0.04376325  | 0.072673953 | no |
| RGL1      | 0.076285978  | 2.019893634  | 0.043776548 | 0.072690067 | no |
| ZFAND5    | -0.076256451 | -2.019107231 | 0.04385842  | 0.072820032 | no |
| CACNB3    | -0.076244117 | -2.01877875  | 0.043892656 | 0.072870892 | no |
| OR10G9    | 0.076231946  | 2.018454597  | 0.043926463 | 0.072919491 | no |
| ADAM7     | 0.076230982  | 2.018428919  | 0.043929143 | 0.072919491 | no |
| DCTN5     | 0.076216163  | 2.018034252  | 0.043970336 | 0.072981878 | no |
| IGSF22    | -0.076214577 | -2.01799201  | 0.043974747 | 0.072983207 | no |
| LHFPL1    | -0.076201469 | -2.017642916 | 0.044011214 | 0.073037735 | no |
| ATP5C1    | -0.07619414  | -2.017447737 | 0.044031614 | 0.07305975  | no |
| LRRC26    | -0.076194107 | -2.017446845 | 0.044031707 | 0.07305975  | no |
| LRRC19    | -0.076187321 | -2.017266118 | 0.044050604 | 0.073085106 | no |
| IKZF4     | -0.076177393 | -2.017001723 | 0.044078261 | 0.073124992 | no |
| GSPT1     | -0.07617485  | -2.016934004 | 0.044085347 | 0.073130747 | no |



|              |              |              |             |             |    |
|--------------|--------------|--------------|-------------|-------------|----|
| UBR5         | -0.076160495 | -2.016551688 | 0.044125371 | 0.073191135 | no |
| SMOX         | -0.076153542 | -2.016366511 | 0.044144767 | 0.073217302 | no |
| GALK1        | 0.076142452  | 2.016071163  | 0.044175719 | 0.073262627 | no |
| TRIM44       | 0.076119453  | 2.015458656  | 0.044239967 | 0.073363161 | no |
| RPS13        | -0.076108673 | -2.015171581 | 0.044270107 | 0.07340712  | no |
| KIAA1328     | -0.076103037 | -2.015021482 | 0.044285872 | 0.07342724  | no |
| DDX19B       | -0.076097697 | -2.014879264 | 0.044300814 | 0.073445991 | no |
| C21orf91     | 0.076093965  | 2.014779867  | 0.04431126  | 0.073454238 | no |
| FGF10        | 0.076093324  | 2.014762789  | 0.044313055 | 0.073454238 | no |
| IFI27L1      | 0.076088745  | 2.014640851  | 0.044325873 | 0.073469462 | no |
| USP6NL       | 0.076073105  | 2.014224326  | 0.04436968  | 0.073531651 | no |
| XIST         | -0.076072753 | -2.014214948 | 0.044370667 | 0.073531651 | no |
| LOC55908     | -0.076055232 | -2.013748362 | 0.044419784 | 0.073607015 | no |
| GLIPR1L1     | -0.076044821 | -2.01347109  | 0.044448994 | 0.073649382 | no |
| DBX1         | 0.076037402  | 2.013273513  | 0.044469818 | 0.073677849 | no |
| GMPR         | 0.076035609  | 2.013225772  | 0.044474851 | 0.07368015  | no |
| FBXW10       | -0.076021551 | -2.012851371 | 0.044514339 | 0.073739525 | no |
| DNAH3        | 0.075979757  | 2.011738351  | 0.044631902 | 0.073928216 | no |
| RAD23A       | -0.075974602 | -2.011601064 | 0.044646422 | 0.073946207 | no |
| CLEC2D       | 0.075963319  | 2.01130059   | 0.044678213 | 0.073992801 | no |
| LYPD5        | -0.075949157 | -2.01092345  | 0.044718143 | 0.074052864 | no |
| DEFB131      | -0.075947827 | -2.010888039 | 0.044721894 | 0.07405301  | no |
| SLC22A1      | 0.075926379  | 2.010316862  | 0.04478243  | 0.074147176 | no |
| C7orf59      | 0.075900106  | 2.009617186  | 0.044856679 | 0.07426403  | no |
| ATP6V1B2     | 0.075896366  | 2.009517595  | 0.044867256 | 0.074275459 | no |
| CLDN8        | 0.075839697  | 2.008008479  | 0.045027789 | 0.07453511  | no |
| LOC285456    | -0.075833941 | -2.007855181 | 0.045044123 | 0.074556044 | no |
| CDH2         | 0.075790179  | 2.006689815  | 0.045168459 | 0.074755722 | no |
| CCNJ         | -0.075785592 | -2.006567658 | 0.045181509 | 0.074771199 | no |
| KCP          | 0.075780741  | 2.006438466  | 0.045195314 | 0.074787924 | no |
| ZNF671       | -0.075760955 | -2.005911584 | 0.045251652 | 0.074873344 | no |
| MCPH1        | -0.075760011 | -2.005886446 | 0.045254341 | 0.074873344 | no |
| FBX03        | -0.075746183 | -2.005518203 | 0.045293753 | 0.07493242  | no |
| TBPL2        | 0.075741187  | 2.005385158  | 0.045308    | 0.074949856 | no |
| LOC100128822 | -0.075724827 | -2.004949502 | 0.045354677 | 0.075020933 | no |
| ZNF630       | 0.075712096  | 2.004610476  | 0.045391029 | 0.075070285 | no |
| PPP1R2       | 0.075711777  | 2.004601987  | 0.04539194  | 0.075070285 | no |
| CDC14A       | 0.075706812  | 2.004469773  | 0.045406123 | 0.0750876   | no |
| GNAS         | -0.075680132 | -2.003759318 | 0.045482403 | 0.075207592 | no |
| MCART3P      | -0.07567692  | -2.003673783 | 0.045491594 | 0.075216638 | no |
| GSTO2        | -0.075672352 | -2.003552127 | 0.045504669 | 0.075232104 | no |
| TTC8         | 0.075668919  | 2.00346072   | 0.045514495 | 0.075242197 | no |
| LOC494141    | 0.075656142  | 2.003120475  | 0.045551087 | 0.075295784 | no |
| DCP1A        | 0.075655     | 2.003090056  | 0.045554359 | 0.075295784 | no |
| APOE         | -0.075645213 | -2.002829456 | 0.045582404 | 0.07533598  | no |
| ELMOD3       | 0.075640853  | 2.002713343  | 0.045594904 | 0.07535048  | no |
| CCNJL        | 0.075625429  | 2.002302614  | 0.045639145 | 0.075417427 | no |
| GPR78        | -0.075600497 | -2.001638719 | 0.045710731 | 0.075529549 | no |
| SLC34A3      | -0.075598565 | -2.001587255 | 0.045716284 | 0.075532551 | no |
| F2           | -0.075594477 | -2.001478409 | 0.045728031 | 0.075545786 | no |
| OR2T6        | -0.075589919 | -2.00135702  | 0.045741135 | 0.07556126  | no |

|              |              |              |             |             |    |
|--------------|--------------|--------------|-------------|-------------|----|
| SERTAD4      | 0.075580631  | 2.001109692  | 0.045767843 | 0.075599203 | no |
| HIBCH        | -0.075579062 | -2.00106792  | 0.045772355 | 0.075600479 | no |
| ANUBL1       | 0.075555855  | 2.000449941  | 0.045839151 | 0.07570462  | no |
| TRAFD1       | 0.075550329  | 2.000302817  | 0.045855065 | 0.075724717 | no |
| FAM198A      | 0.07552334   | 1.999584135  | 0.045932873 | 0.075847013 | no |
| UQCR11       | 0.07551735   | 1.999424627  | 0.045950157 | 0.075869357 | no |
| LOC100132832 | -0.075491121 | -1.998726214 | 0.046025901 | 0.075988214 | no |
| TSEN54       | -0.07548004  | -1.998431148 | 0.046057933 | 0.076034889 | no |
| VIT          | 0.075476745  | 1.998343406  | 0.046067462 | 0.076044411 | no |
| PYDC1        | -0.075469522 | -1.998151073 | 0.046088355 | 0.076072688 | no |
| PTCHD1       | 0.075458941  | 1.997869319  | 0.046118976 | 0.076117017 | no |
| BAG5         | -0.075446017 | -1.997525187 | 0.0461564   | 0.076172566 | no |
| ZNF544       | 0.075444535  | 1.997485715  | 0.046160695 | 0.076172795 | no |
| NOM1         | 0.075443368  | 1.997454647  | 0.046164075 | 0.076172795 | no |
| CDK6         | 0.075426384  | 1.997002401  | 0.046213302 | 0.0762478   | no |
| GRINA        | -0.075412398 | -1.99662998  | 0.046253873 | 0.076308512 | no |
| CENPM        | 0.075400789  | 1.99632087   | 0.046287571 | 0.076357874 | no |
| DDX3X        | 0.075396346  | 1.996202544  | 0.046300475 | 0.076372931 | no |
| PDE12        | 0.075381692  | 1.995812347  | 0.046343052 | 0.076436367 | no |
| ECD          | -0.075380507 | -1.995780812 | 0.046346494 | 0.076436367 | no |
| CROCCL1      | -0.075371956 | -1.995553104 | 0.046371357 | 0.076471134 | no |
| MYRIP        | -0.075354661 | -1.995092585 | 0.046421675 | 0.076542618 | no |
| SDR42E1      | 0.075353503  | 1.995061748  | 0.046425046 | 0.076542618 | no |
| LIPG         | 0.075353154  | 1.995052455  | 0.046426062 | 0.076542618 | no |
| C9orf123     | 0.075341865  | 1.994751882  | 0.046458932 | 0.076590564 | no |
| TIMM8B       | 0.075321256  | 1.9942031    | 0.046518994 | 0.076683329 | no |
| LOC220594    | -0.075310588 | -1.993919069 | 0.046550106 | 0.076728359 | no |
| SPATS1       | 0.075307822  | 1.993845393  | 0.04655818  | 0.07673541  | no |
| GSTA2        | 0.07528083   | 1.993126687  | 0.046636995 | 0.076859045 | no |
| ATXN2        | -0.075269967 | -1.99283746  | 0.046668744 | 0.0769051   | no |
| RELL2        | -0.075264413 | -1.992689549 | 0.046684988 | 0.07692287  | no |
| F11          | 0.075263678  | 1.992669981  | 0.046687137 | 0.07692287  | no |
| CHRN1        | 0.075258027  | 1.992519536  | 0.046703665 | 0.076943831 | no |
| BRPF1        | -0.075230824 | -1.991795196 | 0.046783308 | 0.077068762 | no |
| TPTE2P3      | -0.075220728 | -1.99152639  | 0.046812893 | 0.077111216 | no |
| IFIT1        | 0.075205699  | 1.991126207  | 0.046856967 | 0.077177528 | no |
| RHOB         | -0.075186014 | -1.990602064 | 0.046914745 | 0.0772664   | no |
| FNBP1        | 0.075174513  | 1.99029586   | 0.046948528 | 0.077315739 | no |
| OPRK1        | -0.075164719 | -1.990035079 | 0.046977315 | 0.077356845 | no |
| MAN1B1       | 0.075148884  | 1.989613452  | 0.047023888 | 0.077427232 | no |
| PKNOX1       | -0.075114951 | -1.988709945 | 0.047123823 | 0.07758546  | no |
| TCEAL8       | 0.075105685  | 1.988463228  | 0.047151143 | 0.077624119 | no |
| DENND4A      | 0.075101226  | 1.988344516  | 0.047164293 | 0.077639446 | no |
| LCMT2        | -0.075065453 | -1.987392048 | 0.047269913 | 0.077802521 | no |
| WDR5B        | -0.075065068 | -1.987381773 | 0.047271054 | 0.077802521 | no |
| LOC653501    | -0.07504836  | -1.986936933 | 0.047320452 | 0.077877484 | no |
| TUBBP5       | 0.075034587  | 1.986570225  | 0.047361206 | 0.077938211 | no |
| BCAT2        | 0.07501223   | 1.985974955  | 0.047427425 | 0.07804083  | no |
| HSD17B2      | 0.075006667  | 1.985826848  | 0.047443913 | 0.078061607 | no |
| GLYAT        | 0.074997232  | 1.985575643  | 0.047471889 | 0.078101282 | no |
| EMX2         | -0.074984287 | -1.98523096  | 0.047510298 | 0.078157512 | no |

|           |              |              |             |             |    |
|-----------|--------------|--------------|-------------|-------------|----|
| TBC1D29   | -0.074983107 | -1.985199559 | 0.047513798 | 0.078157512 | no |
| LOC650368 | 0.074976868  | 1.985033455  | 0.047532318 | 0.078179949 | no |
| PHLDB1    | -0.074975907 | -1.985007866 | 0.047535172 | 0.078179949 | no |
| CHRM2     | -0.074961495 | -1.984624144 | 0.047577981 | 0.078243991 | no |
| VWA3A     | 0.074953107  | 1.984400814  | 0.047602911 | 0.078278622 | no |
| PEX3      | 0.074935249  | 1.983925353  | 0.047656023 | 0.078359587 | no |
| NDUFB2    | 0.074922061  | 1.983574219  | 0.047695279 | 0.078417757 | no |
| ARFRP1    | -0.074914352 | -1.983368955 | 0.04771824  | 0.078444772 | no |
| ATAD3A    | -0.074913939 | -1.983357961 | 0.04771947  | 0.078444772 | no |
| ZNF146    | -0.074897659 | -1.982924522 | 0.047767986 | 0.078518141 | no |
| PCDHGA8   | -0.074864595 | -1.982044213 | 0.047866649 | 0.078673921 | no |
| HIST1H2BN | 0.074850031  | 1.981656466  | 0.047910161 | 0.078739037 | no |
| OCLN      | -0.074845218 | -1.981528324 | 0.047924548 | 0.07875628  | no |
| ODZ2      | -0.07482709  | -1.981045667 | 0.047978771 | 0.078838979 | no |
| KCNIP1    | -0.0748156   | -1.980739775 | 0.048013163 | 0.07888908  | no |
| ANKLE1    | -0.074804    | -1.980430937 | 0.048047906 | 0.078939751 | no |
| TRNP1     | -0.07479952  | -1.98031166  | 0.048061331 | 0.07895539  | no |
| SIX3      | 0.074764288  | 1.979373641  | 0.048167011 | 0.079117147 | no |
| ZNF184    | -0.074764085 | -1.979368229 | 0.048167621 | 0.079117147 | no |
| AGK       | 0.074759197  | 1.979238104  | 0.048182297 | 0.079134824 | no |
| SC4MOL    | -0.074738735 | -1.978693338 | 0.048243778 | 0.079229365 | no |
| KIAA0922  | 0.074720677  | 1.978212555  | 0.048298094 | 0.079312123 | no |
| DACH1     | -0.074709195 | -1.977906867 | 0.048332655 | 0.079362431 | no |
| LIAS      | -0.074687991 | -1.977342345 | 0.048396534 | 0.079460868 | no |
| RHOBTB2   | -0.074686648 | -1.97730661  | 0.04840058  | 0.079461058 | no |
| GPR37     | 0.074662608  | 1.976666573  | 0.048473096 | 0.079573648 | no |
| CCDC105   | -0.074660822 | -1.976619041 | 0.048478485 | 0.079576033 | no |
| ZNF134    | 0.074655405  | 1.976474808  | 0.04849484  | 0.079596418 | no |
| DDX39     | 0.074648252  | 1.97628438   | 0.048516441 | 0.079625409 | no |
| UNC5D     | -0.074636018 | -1.975958672 | 0.048553407 | 0.079679608 | no |
| WIZ       | -0.074623487 | -1.97562507  | 0.048591292 | 0.079735309 | no |
| PCDHGB4   | -0.074617589 | -1.975468056 | 0.048609132 | 0.079758111 | no |
| LOC375190 | -0.074604569 | -1.975121408 | 0.048648538 | 0.07981629  | no |
| DENND2A   | 0.074593229  | 1.974819513  | 0.048682879 | 0.07986615  | no |
| PER2      | -0.074574255 | -1.974314381 | 0.048740383 | 0.079953092 | no |
| ZNF69     | 0.074573134  | 1.974284524  | 0.048743783 | 0.079953092 | no |
| VPS37A    | 0.074571097  | 1.974230296  | 0.04874996  | 0.079956737 | no |
| TOMM40L   | 0.074552061  | 1.973723511  | 0.04880772  | 0.080044977 | no |
| TINAGL1   | 0.074526486  | 1.97304266   | 0.048885408 | 0.080165884 | no |
| PPIG      | 0.074518787  | 1.972837691  | 0.048908816 | 0.080197765 | no |
| TBCEL     | -0.074515371 | -1.972746741 | 0.048919206 | 0.080208297 | no |
| ETV2      | 0.074508833  | 1.9725727    | 0.048939093 | 0.080234397 | no |
| RYBP      | 0.074504364  | 1.972453707  | 0.048952694 | 0.080250188 | no |
| LOC727677 | -0.074492254 | -1.972131311 | 0.04898956  | 0.080304113 | no |
| GPR52     | -0.074488636 | -1.972035001 | 0.049000578 | 0.080315661 | no |
| OR9A4     | 0.074486764  | 1.971985157  | 0.049006281 | 0.080318497 | no |
| NDUFA1    | 0.074483624  | 1.971901564  | 0.049015846 | 0.080327663 | no |
| REG4      | 0.074475792  | 1.97169308   | 0.049039709 | 0.080360256 | no |
| TEX10     | -0.074453594 | -1.971102114 | 0.049107405 | 0.080464666 | no |
| SFRS15    | -0.07444983  | -1.971001923 | 0.04911889  | 0.080476962 | no |
| OR52E2    | -0.074437647 | -1.970677577 | 0.049156084 | 0.080531376 | no |

|           |              |              |             |             |    |
|-----------|--------------|--------------|-------------|-------------|----|
| TULP3     | 0.074429749  | 1.970467314  | 0.049180209 | 0.080564371 | no |
| WDR19     | 0.074383385  | 1.969233048  | 0.049322025 | 0.080790141 | no |
| NSMCE1    | -0.074365662 | -1.968761229 | 0.049376328 | 0.080869178 | no |
| CNOT1     | 0.074365026  | 1.968744303  | 0.049378277 | 0.080869178 | no |
| RAB4A     | -0.074360376 | -1.968620502 | 0.049392534 | 0.080885975 | no |
| C4orf46   | 0.074355997  | 1.96850393   | 0.049405962 | 0.080901412 | no |
| MT01      | 0.074292373  | 1.966810198  | 0.049601409 | 0.081214876 | no |
| C1orf168  | -0.074289355 | -1.966729869 | 0.049610695 | 0.081223502 | no |
| STX6      | -0.074282047 | -1.966535324 | 0.049633189 | 0.081253751 | no |
| FAM194A   | 0.074233554  | 1.965244404  | 0.049782671 | 0.081486089 | no |
| ACRV1     | -0.074233392 | -1.96524008  | 0.049783172 | 0.081486089 | no |
| OR2AE1    | 0.074188223  | 1.964037673  | 0.049922745 | 0.08170558  | no |
| DDX10     | -0.074186931 | -1.964003282 | 0.049926742 | 0.08170558  | no |
| ILKAP     | -0.074186075 | -1.963980488 | 0.049929391 | 0.08170558  | no |
| FAM153A   | -0.074182468 | -1.963884479 | 0.049940551 | 0.081717228 | no |
| GPR155    | -0.074163393 | -1.963376691 | 0.049999611 | 0.081807246 | no |
| MYB       | 0.074157128  | 1.963209908  | 0.050019022 | 0.081832382 | no |
| PCDHA12   | -0.074148395 | -1.962977444 | 0.050046088 | 0.081870038 | no |
| SPATA21   | -0.07414324  | -1.962840216 | 0.050062071 | 0.081889559 | no |
| TRPA1     | 0.074138089  | 1.9627031    | 0.050078045 | 0.081909062 | no |
| LSM6      | 0.074131126  | 1.96251775   | 0.050099646 | 0.081934637 | no |
| NXP2      | -0.074130436 | -1.962499384 | 0.050101787 | 0.081934637 | no |
| RPS4Y2    | 0.074112577  | 1.962023989  | 0.050157227 | 0.082018668 | no |
| C6orf94   | -0.074110951 | -1.961980686 | 0.050162279 | 0.082020296 | no |
| SLC17A8   | -0.074105543 | -1.96183674  | 0.050179078 | 0.082041128 | no |
| APOLD1    | -0.074092416 | -1.961487307 | 0.050219876 | 0.082101193 | no |
| PAN2      | -0.074088513 | -1.961383397 | 0.050232013 | 0.082114396 | no |
| KNG1      | -0.07408444  | -1.96127498  | 0.05024468  | 0.082128462 | no |
| HIVEP1    | -0.074078482 | -1.961116378 | 0.050263215 | 0.082152116 | no |
| CCDC151   | 0.074071596  | 1.960933075  | 0.050284643 | 0.082180496 | no |
| LOC150197 | 0.074049761  | 1.960351841  | 0.050352641 | 0.082284973 | no |
| IQCD      | 0.074023349  | 1.959648771  | 0.050434995 | 0.082412894 | no |
| FAM35A    | -0.074019424 | -1.959544278 | 0.050447245 | 0.082422536 | no |
| OR2D3     | 0.074018845  | 1.959528885  | 0.050449049 | 0.082422536 | no |
| LOC729678 | -0.074009918 | -1.959291253 | 0.050476917 | 0.082461401 | no |
| MMP28     | -0.073980899 | -1.958518796 | 0.050567592 | 0.082602859 | no |
| NBPF15    | 0.073976711  | 1.958407297  | 0.050580692 | 0.082617582 | no |
| DYTN      | 0.073974637  | 1.958352092  | 0.050587179 | 0.082621503 | no |
| VPS13B    | -0.073970106 | -1.958231492 | 0.050601353 | 0.082637976 | no |
| AKAP3     | -0.073962987 | -1.958041981 | 0.050623632 | 0.082667684 | no |
| NDST3     | -0.073946079 | -1.957591932 | 0.050676574 | 0.082747453 | no |
| CCDC3     | 0.073935289  | 1.957304692  | 0.050710387 | 0.082795979 | no |
| CSNK2B    | -0.073901321 | -1.956400521 | 0.05081695  | 0.082963267 | no |
| KITLG     | 0.073893109  | 1.956181925  | 0.050842741 | 0.082998671 | no |
| PDE1B     | -0.07388963  | -1.956089334 | 0.050853669 | 0.083009808 | no |
| ZPLD1     | 0.073877193  | 1.95575828   | 0.050892757 | 0.083066905 | no |
| ZNF776    | 0.07387243   | 1.955631488  | 0.050907734 | 0.083084643 | no |
| MRPS23    | 0.073861133  | 1.955330793  | 0.050943268 | 0.083135926 | no |
| GRM8      | -0.073856559 | -1.955209019 | 0.050957664 | 0.083152708 | no |
| CYCS      | 0.073844954  | 1.954900126  | 0.050994197 | 0.083205606 | no |
| NAA10     | 0.073837599  | 1.954704353  | 0.051017362 | 0.083236687 | no |

|              |              |              |             |             |    |
|--------------|--------------|--------------|-------------|-------------|----|
| C4orf19      | 0.073825826  | 1.954390977  | 0.051054462 | 0.083290495 | no |
| LOC100129550 | -0.073812117 | -1.954026054 | 0.051097692 | 0.083354296 | no |
| PAH          | -0.073808313 | -1.95392482  | 0.051109691 | 0.083367142 | no |
| UFC1         | 0.07379864   | 1.953667323  | 0.05114022  | 0.08341021  | no |
| MAEL         | 0.073786751  | 1.953350885  | 0.051177758 | 0.083462296 | no |
| HIGD2B       | 0.073785911  | 1.953328526  | 0.051180411 | 0.083462296 | no |
| C6orf204     | -0.073780706 | -1.953189983 | 0.051196854 | 0.083482377 | no |
| INCENP       | -0.073767361 | -1.952834763 | 0.051239033 | 0.083544417 | no |
| LOC729991    | 0.073762479  | 1.95270482   | 0.05125447  | 0.083562848 | no |
| ALS2CR4      | 0.073740628  | 1.952123177  | 0.051323615 | 0.083668832 | no |
| RNFT2        | -0.073731362 | -1.951876557 | 0.051352957 | 0.083709916 | no |
| ZNF323       | -0.073711593 | -1.951350339 | 0.051415611 | 0.08380529  | no |
| NTN5         | -0.073708211 | -1.951260323 | 0.051426335 | 0.083809395 | no |
| ODF4         | -0.073708184 | -1.951259614 | 0.05142642  | 0.083809395 | no |
| C15orf27     | -0.073690166 | -1.950780028 | 0.051483587 | 0.083895798 | no |
| MGC2752      | 0.073677091  | 1.950431991  | 0.051525108 | 0.083956193 | no |
| CDC37L1      | -0.07367588  | -1.950399757 | 0.051528954 | 0.083956193 | no |
| MRPS28       | -0.073665893 | -1.950133939 | 0.051560687 | 0.084001125 | no |
| NEK9         | 0.073655912  | 1.949868265  | 0.051592418 | 0.084046049 | no |
| GPR128       | 0.073636664  | 1.949355944  | 0.051653656 | 0.084136104 | no |
| GOLGA1       | -0.07363592  | -1.949336152 | 0.051656022 | 0.084136104 | no |
| ZNF589       | -0.073623003 | -1.948992349 | 0.051697152 | 0.084196313 | no |
| SULT1C2      | 0.073616307  | 1.948814113  | 0.051718486 | 0.084224273 | no |
| SCCPDH       | -0.073580477 | -1.947860432 | 0.051832761 | 0.084403573 | no |
| SLC16A6      | 0.073575403  | 1.947725369  | 0.051848962 | 0.084423154 | no |
| FBX02        | -0.073571333 | -1.947617048 | 0.051861958 | 0.084437516 | no |
| APPL2        | -0.073547841 | -1.946991766 | 0.051937033 | 0.084552937 | no |
| CPXCR1       | 0.073511122  | 1.946014448  | 0.052054557 | 0.084737442 | no |
| ZNF135       | -0.073507648 | -1.945921977 | 0.052065688 | 0.084748739 | no |
| ADAMTS19     | -0.073487892 | -1.945396163 | 0.052129022 | 0.084844998 | no |
| KRT31        | -0.073471073 | -1.944948512 | 0.052182992 | 0.084926002 | no |
| ZNF579       | -0.073468845 | -1.944889194 | 0.052190147 | 0.08493081  | no |
| OR4K2        | -0.07345766  | -1.944591506 | 0.052226067 | 0.084979889 | no |
| ACOT1        | -0.073456837 | -1.944569587 | 0.052228712 | 0.084979889 | no |
| RFNG         | -0.073443137 | -1.944204956 | 0.05227274  | 0.085044682 | no |
| C5orf34      | 0.073433726  | 1.94395447   | 0.052303003 | 0.085085534 | no |
| MSMP         | 0.073431734  | 1.943901451  | 0.052309411 | 0.085085534 | no |
| ZNF669       | -0.073431403 | -1.943892643 | 0.052310475 | 0.085085534 | no |
| FAM8A1       | -0.073425824 | -1.943744156 | 0.052328424 | 0.085105726 | no |
| FKTN         | -0.073424928 | -1.943720303 | 0.052331308 | 0.085105726 | no |
| SLC29A2      | -0.073417072 | -1.943511221 | 0.052356592 | 0.085139996 | no |
| EIF4E2       | 0.073415247  | 1.943462638  | 0.052362468 | 0.085142704 | no |
| INHBB        | 0.07340786   | 1.943266045  | 0.052386253 | 0.085174528 | no |
| OR8D1        | 0.073390698  | 1.942809274  | 0.05244155  | 0.08525758  | no |
| UTS2D        | 0.073381103  | 1.942553893  | 0.052472488 | 0.085301019 | no |
| HIST1H3H     | 0.073364923  | 1.942123252  | 0.052524693 | 0.08537902  | no |
| DPY19L2P1    | 0.073356498  | 1.941899014  | 0.052551894 | 0.085416367 | no |
| MLL2         | -0.073343233 | -1.941545974 | 0.052594742 | 0.08547914  | no |
| RTP3         | 0.0733327    | 1.941265625  | 0.052628789 | 0.085527599 | no |
| NCBP1        | 0.073328305  | 1.941148654  | 0.052643    | 0.085543817 | no |
| PMPCA        | -0.073317035 | -1.940848702 | 0.052679456 | 0.085596178 | no |

|           |              |              |             |             |    |
|-----------|--------------|--------------|-------------|-------------|----|
| POPDC3    | 0.073312424  | 1.940725969  | 0.052694379 | 0.085613546 | no |
| UNC119B   | 0.073308938  | 1.940633199  | 0.052705662 | 0.085624995 | no |
| FAM7A3    | 0.073240051  | 1.938799775  | 0.052929049 | 0.085980999 | no |
| GPI       | 0.073225925  | 1.938423823  | 0.052974954 | 0.086048656 | no |
| TMEM206   | -0.073217312 | -1.938194594 | 0.053002959 | 0.08608654  | no |
| KIAA0907  | -0.073216133 | -1.938163226 | 0.053006793 | 0.08608654  | no |
| ATXN7     | 0.073213956  | 1.938105267  | 0.053013876 | 0.086090115 | no |
| ETAA1     | 0.073212838  | 1.938075535  | 0.05301751  | 0.086090115 | no |
| ROPN1B    | 0.073197452  | 1.937666037  | 0.053067582 | 0.086164502 | no |
| LYRM2     | -0.073193868 | -1.937570661 | 0.05307925  | 0.086173513 | no |
| SNX30     | -0.07319313  | -1.937550996 | 0.053081656 | 0.086173513 | no |
| HSPA13    | -0.073190624 | -1.937484313 | 0.053089816 | 0.086179839 | no |
| ATP5H     | 0.073174921  | 1.937066376  | 0.053140978 | 0.086255965 | no |
| MLC1      | -0.073167163 | -1.936859906 | 0.053166269 | 0.086272052 | no |
| DDX52     | -0.073166767 | -1.936849375 | 0.053167559 | 0.086272052 | no |
| FAM107A   | -0.073166651 | -1.936846294 | 0.053167937 | 0.086272052 | no |
| HOXC10    | 0.073166645  | 1.936846122  | 0.053167958 | 0.086272052 | no |
| ZNF233    | -0.073157275 | -1.936596742 | 0.053198519 | 0.086314714 | no |
| PAG1      | -0.073141073 | -1.936165555 | 0.053251395 | 0.086393573 | no |
| FOXN2     | -0.073130829 | -1.935892913 | 0.053284851 | 0.086440915 | no |
| ZGLP1     | -0.073124661 | -1.935728754 | 0.053305004 | 0.08646667  | no |
| ZNF391    | -0.07311722  | -1.935530722 | 0.053329324 | 0.086494894 | no |
| OR4F6     | 0.073116719  | 1.935517402  | 0.05333096  | 0.086494894 | no |
| LUC7L2    | -0.073110132 | -1.935342089 | 0.053352498 | 0.086522884 | no |
| IGFL1     | -0.073076808 | -1.934455217 | 0.053461565 | 0.086692807 | no |
| SPATA24   | 0.073056087  | 1.933903754  | 0.053529478 | 0.086795973 | no |
| GDA       | -0.073036252 | -1.933375875 | 0.053594554 | 0.086894522 | no |
| ISOC1     | 0.0730028    | 1.9324856    | 0.053704456 | 0.087065727 | no |
| CCNB2     | 0.073000505  | 1.932424537  | 0.053712001 | 0.087066715 | no |
| TBC1D9B   | 0.072999995  | 1.932410966  | 0.053713678 | 0.087066715 | no |
| C3orf23   | -0.072991299 | -1.932179518 | 0.053742284 | 0.0871061   | no |
| ARF5      | 0.07296951   | 1.931599647  | 0.053814011 | 0.087215364 | no |
| CHRD12    | 0.072956918  | 1.931264556  | 0.053855496 | 0.087275603 | no |
| LOC340017 | -0.072940384 | -1.930824523 | 0.053910014 | 0.087356951 | no |
| C6orf130  | -0.072936794 | -1.930728988 | 0.053921857 | 0.087369138 | no |
| PATL1     | 0.072931468  | 1.930587251  | 0.053939431 | 0.087390609 | no |
| WDR60     | -0.072927459 | -1.930480561 | 0.053952662 | 0.087405042 | no |
| DPM3      | 0.072926063  | 1.930443398  | 0.053957271 | 0.087405506 | no |
| FAM118B   | 0.072914796  | 1.930143563  | 0.053994474 | 0.087458762 | no |
| ARHGAP24  | 0.072906877  | 1.92993282   | 0.054020634 | 0.087491475 | no |
| TYK2      | 0.072906063  | 1.929911152  | 0.054023325 | 0.087491475 | no |
| FAM82B    | 0.07290272   | 1.92982218   | 0.054034373 | 0.087502359 | no |
| HDAC8     | -0.072895532 | -1.92963089  | 0.054058133 | 0.087533825 | no |
| C4orf6    | 0.072890641  | 1.929500734  | 0.054074305 | 0.087549646 | no |
| C21orf34  | -0.072889958 | -1.929482548 | 0.054076565 | 0.087549646 | no |
| ZNF280D   | -0.072884065 | -1.929325739 | 0.054096054 | 0.087574187 | no |
| ASIP      | 0.07287822   | 1.929170169  | 0.054115395 | 0.087598484 | no |
| GNAQ      | -0.07285934  | -1.928667741 | 0.054177899 | 0.087692639 | no |
| ABCC6     | 0.072857003  | 1.928605528  | 0.054185642 | 0.087698152 | no |
| CNOT8     | -0.072848754 | -1.928386019 | 0.054212972 | 0.087735362 | no |
| RSPH3     | 0.072836286  | 1.928054226  | 0.054254304 | 0.087795223 | no |

|            |              |              |             |             |    |
|------------|--------------|--------------|-------------|-------------|----|
| NBPF3      | 0.072827951  | 1.927832396  | 0.054281952 | 0.087832933 | no |
| MKS1       | -0.072811161 | -1.927385592 | 0.054337676 | 0.087911303 | no |
| EYS        | -0.072810738 | -1.927374325 | 0.054339082 | 0.087911303 | no |
| DCTN4      | -0.072791492 | -1.926862148 | 0.054403019 | 0.0880077   | no |
| GOLT1A     | 0.07276983   | 1.926285673  | 0.054475058 | 0.088117187 | no |
| CAPN14     | -0.072753297 | -1.925845708 | 0.054530091 | 0.088199151 | no |
| DCHS1      | 0.07273265   | 1.92529627   | 0.054598884 | 0.088303354 | no |
| B4GALT2    | -0.07272397  | -1.925065268 | 0.054627828 | 0.088343099 | no |
| CDH23      | 0.072719621  | 1.924949524  | 0.054642336 | 0.088359252 | no |
| PGM2L1     | 0.072718355  | 1.92491585   | 0.054646557 | 0.088359252 | no |
| SCGB2A1    | 0.072705689  | 1.924578796  | 0.054688825 | 0.088420524 | no |
| XG         | 0.072694775  | 1.92428835   | 0.054725269 | 0.088472373 | no |
| NXNL2      | 0.072675537  | 1.923776409  | 0.054789556 | 0.088569221 | no |
| AKT2       | 0.07266834   | 1.923584883  | 0.054813623 | 0.088593999 | no |
| PITX1      | 0.072668333  | 1.923584688  | 0.054813648 | 0.088593999 | no |
| C1orf156   | 0.072663858  | 1.923465609  | 0.054828616 | 0.088611108 | no |
| ZKSCAN3    | -0.072662273 | -1.923423418 | 0.05483392  | 0.088612596 | no |
| CLK2       | -0.07265395  | -1.92320195  | 0.054861769 | 0.088650516 | no |
| TAS2R43    | -0.072642385 | -1.922894173 | 0.054900491 | 0.088705996 | no |
| FIGLA      | -0.072634359 | -1.922680611 | 0.054927373 | 0.088742339 | no |
| C6orf167   | 0.072601085  | 1.921795155  | 0.055038948 | 0.088915497 | no |
| COMMD3     | 0.072589992  | 1.921499941  | 0.055076189 | 0.088968551 | no |
| IGFBP1     | 0.072584588  | 1.921356152  | 0.055094336 | 0.088990755 | no |
| POU5F1B    | -0.072573847 | -1.921070314 | 0.055130424 | 0.089041933 | no |
| SLC39A10   | -0.07257147  | -1.921007059 | 0.055138413 | 0.089047722 | no |
| PIGA       | 0.072564002  | 1.920808332  | 0.055163518 | 0.089081151 | no |
| TP53TG5    | -0.072553922 | -1.920540092 | 0.055197419 | 0.089128778 | no |
| FOXN4      | -0.0725395   | -1.920156321 | 0.055245953 | 0.089200022 | no |
| SERPINA10  | -0.072526017 | -1.919797531 | 0.055291359 | 0.089266206 | no |
| GSX2       | 0.072508407  | 1.919328925  | 0.05535071  | 0.089354891 | no |
| C13orf27   | -0.072496259 | -1.919005661 | 0.055391684 | 0.089413897 | no |
| BGLAP      | -0.072494199 | -1.91895085  | 0.055398633 | 0.089417976 | no |
| TMEM212    | 0.072488773  | 1.918806453  | 0.055416946 | 0.089440394 | no |
| GPR63      | -0.072474666 | -1.918431077 | 0.055464575 | 0.089510119 | no |
| ASCL4      | 0.072439692  | 1.917500408  | 0.055582808 | 0.089693768 | no |
| POLG       | -0.072420995 | -1.9170029   | 0.055646099 | 0.089788733 | no |
| OTX1       | 0.072411122  | 1.916740164  | 0.055679547 | 0.089835534 | no |
| GTSE1      | 0.072395232  | 1.916317344  | 0.05573341  | 0.089915264 | no |
| ACTR8      | -0.072383504 | -1.916005254 | 0.055773196 | 0.089972271 | no |
| CRYAB      | -0.072354433 | -1.915231689 | 0.055871912 | 0.090124327 | no |
| NOP58      | -0.072348146 | -1.915064413 | 0.055893277 | 0.090151598 | no |
| PIAS2      | 0.072342391  | 1.914911266  | 0.055912844 | 0.090175964 | no |
| DMXL1      | -0.072335967 | -1.914740342 | 0.05593469  | 0.090204    | no |
| SON        | -0.0723328   | -1.914656067 | 0.055945463 | 0.090214178 | no |
| POU5F1     | 0.072324579  | 1.914437297  | 0.055973438 | 0.090252091 | no |
| ZNF487     | 0.072320861  | 1.914338363  | 0.055986093 | 0.090265297 | no |
| NME2P1     | 0.072314315  | 1.91416418   | 0.056008378 | 0.090294027 | no |
| NCRNA00160 | 0.072297064  | 1.913705152  | 0.056067145 | 0.09038156  | no |
| SNRNP25    | -0.072291448 | -1.913555721 | 0.056086286 | 0.090400246 | no |
| SNRNP35    | -0.07229104  | -1.913544852 | 0.056087679 | 0.090400246 | no |
| GAS8       | 0.072275329  | 1.913126801  | 0.05614126  | 0.090479394 | no |

|              |              |              |             |             |    |
|--------------|--------------|--------------|-------------|-------------|----|
| ALDH3A2      | 0.072256382  | 1.912622639  | 0.056205935 | 0.090576406 | no |
| AQP4         | 0.072249616  | 1.912442613  | 0.056229044 | 0.090598104 | no |
| C10orf27     | 0.072249603  | 1.912442265  | 0.056229088 | 0.090598104 | no |
| ATP13A5      | -0.072248504 | -1.912413027 | 0.056232842 | 0.090598104 | no |
| C3orf51      | -0.072242347 | -1.912249198 | 0.05625388  | 0.090624777 | no |
| CKAP2L       | 0.0722323    | 1.911981849  | 0.056288226 | 0.090672883 | no |
| ZNF529       | -0.072213366 | -1.911478041 | 0.056352996 | 0.090769987 | no |
| PLGLB2       | -0.072200943 | -1.911147479 | 0.056395528 | 0.090831258 | no |
| DNAJA1       | 0.072189725  | 1.91084898   | 0.056433957 | 0.090878059 | no |
| ZRANB3       | 0.072189638  | 1.910846663  | 0.056434255 | 0.090878059 | no |
| CPNE6        | -0.072188524 | -1.910817035 | 0.056438071 | 0.090878059 | no |
| RLIM         | -0.072184698 | -1.910715228 | 0.056451183 | 0.090891934 | no |
| ZFAND2A      | 0.072182228  | 1.910649505  | 0.056459649 | 0.090898327 | no |
| H2BFM        | -0.072154003 | -1.909898478 | 0.056556471 | 0.091046956 | no |
| HDAC2        | -0.072126506 | -1.909166851 | 0.056650924 | 0.091180297 | no |
| CNGB3        | -0.072123309 | -1.909081772 | 0.056661916 | 0.091180297 | no |
| ATG9B        | 0.072123117  | 1.909076674  | 0.056662575 | 0.091180297 | no |
| TLL1         | -0.072122772 | -1.909067485 | 0.056663763 | 0.091180297 | no |
| MED29        | -0.072122693 | -1.909065377 | 0.056664035 | 0.091180297 | no |
| RNF167       | 0.072122017  | 1.909047397  | 0.056666358 | 0.091180297 | no |
| TNNI3        | -0.072113524 | -1.908821403 | 0.056695567 | 0.09121967  | no |
| AURKC        | 0.072112278  | 1.908788269  | 0.056699851 | 0.09121967  | no |
| CLDND2       | -0.07210363  | -1.908558153 | 0.056729608 | 0.091260281 | no |
| PPP1R12C     | -0.072090729 | -1.908214878 | 0.056774021 | 0.091324462 | no |
| KIAA1407     | 0.07208096   | 1.907954962  | 0.056807669 | 0.091371317 | no |
| ADNP         | -0.072070989 | -1.907689646 | 0.056842033 | 0.091419316 | no |
| MNAT1        | -0.072063224 | -1.90748303  | 0.056868806 | 0.091455101 | no |
| VMA21        | -0.072054058 | -1.907239145 | 0.056900422 | 0.091493122 | no |
| LOC100130557 | -0.072053746 | -1.907230837 | 0.056901499 | 0.091493122 | no |
| ANKDD1A      | -0.072050765 | -1.907151542 | 0.056911782 | 0.091502379 | no |
| MT1X         | -0.072045862 | -1.907021072 | 0.056928704 | 0.091522308 | no |
| C9orf109     | 0.072041871  | 1.906914869  | 0.056942482 | 0.09153718  | no |
| FSHR         | -0.072039116 | -1.906841572 | 0.056951993 | 0.091545189 | no |
| PDPR         | -0.072000951 | -1.905826103 | 0.05708389  | 0.091747411 | no |
| NHEDC2       | -0.072000088 | -1.905803145 | 0.057086875 | 0.091747411 | no |
| CALCOCO2     | 0.071997161  | 1.905725255  | 0.057097003 | 0.091756395 | no |
| ARID5B       | 0.071978425  | 1.905226734  | 0.05716186  | 0.091853321 | no |
| ENAM         | 0.071975137  | 1.905139259  | 0.057173247 | 0.091864317 | no |
| KCNS2        | -0.071966412 | -1.904907101 | 0.057203476 | 0.091905585 | no |
| CCDC80       | 0.071953606  | 1.904566375  | 0.057247867 | 0.091967877 | no |
| SCGB1D4      | -0.07195246  | -1.904535883 | 0.057251841 | 0.091967877 | no |
| ICA1         | -0.071951291 | -1.904504786 | 0.057255894 | 0.091967877 | no |
| KLHL15       | -0.071925865 | -1.903828288 | 0.057344125 | 0.092102282 | no |
| HOXD9        | 0.071890604  | 1.902890092  | 0.057466675 | 0.092291782 | no |
| HIF1AN       | -0.071839335 | -1.901526002 | 0.057645246 | 0.092571214 | no |
| CSTF3        | -0.071820223 | -1.901017504 | 0.057711931 | 0.092670227 | no |
| AG2          | -0.071819038 | -1.900985964 | 0.057716069 | 0.092670227 | no |
| C6orf64      | -0.071806459 | -1.900651295 | 0.057759996 | 0.092733391 | no |
| GPR89B       | 0.071804643  | 1.900602975  | 0.05776634  | 0.092736213 | no |
| CHP          | -0.071797271 | -1.900406828 | 0.057792101 | 0.092770202 | no |
| PRDX5        | -0.071789479 | -1.900199506 | 0.057819339 | 0.092806557 | no |



|           |              |              |             |             |    |
|-----------|--------------|--------------|-------------|-------------|----|
| RGS4      | -0.071786712 | -1.9001259   | 0.057829012 | 0.092814715 | no |
| PPDPF     | 0.07177839   | 1.899904482  | 0.057858118 | 0.092854059 | no |
| EVPL      | -0.071744482 | -1.899002309 | 0.057976838 | 0.093037202 | no |
| POM121C   | 0.071739787  | 1.898877417  | 0.057993289 | 0.093056215 | no |
| MRPL21    | -0.071724202 | -1.898462759 | 0.058047936 | 0.093136511 | no |
| MEGF8     | -0.071705887 | -1.897975481 | 0.058112208 | 0.093232235 | no |
| GNG8      | -0.071703759 | -1.897918863 | 0.05811968  | 0.093236824 | no |
| OR2L1P    | -0.071692636 | -1.89762293  | 0.058158747 | 0.093292094 | no |
| TPR       | -0.071690617 | -1.897569202 | 0.058165842 | 0.093296073 | no |
| WIBG      | 0.071676087  | 1.897182629  | 0.058216913 | 0.093370581 | no |
| RSL1D1    | -0.071654752 | -1.896614982 | 0.058291973 | 0.09348355  | no |
| MRPL11    | 0.071652933  | 1.896566593  | 0.058298375 | 0.093485931 | no |
| RIOK1     | -0.071651703 | -1.896533866 | 0.058302706 | 0.093485931 | no |
| RBL2      | -0.071645321 | -1.896364083 | 0.058325175 | 0.093514543 | no |
| NEO1      | -0.071643752 | -1.896322333 | 0.058330702 | 0.093515988 | no |
| AGER      | -0.071635463 | -1.896101793 | 0.058359901 | 0.093555383 | no |
| ZNF837    | 0.071626951  | 1.895875344  | 0.058389897 | 0.093596046 | no |
| ENTPD4    | 0.071617867  | 1.895633648  | 0.058421925 | 0.093635684 | no |
| FEZF1     | 0.07161731   | 1.895618844  | 0.058423888 | 0.093635684 | no |
| GRTP1     | 0.071594977  | 1.895024679  | 0.058502689 | 0.093748208 | no |
| EPHB2     | 0.071594369  | 1.895008481  | 0.058504838 | 0.093748208 | no |
| C10orf84  | -0.071593471 | -1.8949846   | 0.058508007 | 0.093748208 | no |
| FRYL      | 0.071562355  | 1.894156759  | 0.058617956 | 0.093913018 | no |
| POLQ      | 0.071561733  | 1.894140214  | 0.058620155 | 0.093913018 | no |
| TMEM208   | 0.071539651  | 1.893552731  | 0.058698287 | 0.09403074  | no |
| TMOD4     | 0.071493413  | 1.892322593  | 0.058862169 | 0.094285798 | no |
| FAM131A   | -0.07146969  | -1.891691455 | 0.058946399 | 0.094413238 | no |
| RGSL1     | 0.071456851  | 1.891349868  | 0.058992028 | 0.094478836 | no |
| FGFBP2    | 0.071452262  | 1.891227786  | 0.059008343 | 0.0944914   | no |
| RHD       | 0.071452015  | 1.891221222  | 0.05900922  | 0.0944914   | no |
| NARG2     | -0.071431662 | -1.890679728 | 0.05908163  | 0.094599858 | no |
| FAM92A1   | -0.071420372 | -1.890379384 | 0.059121825 | 0.09465672  | no |
| BIRC5     | 0.071413622  | 1.890199812  | 0.059145868 | 0.094687716 | no |
| SMCR7     | -0.07140934  | -1.890085894 | 0.059161125 | 0.094704641 | no |
| KLF2      | 0.071390279  | 1.889578783  | 0.05922908  | 0.094805917 | no |
| SORD      | -0.071375322 | -1.889180869 | 0.059282448 | 0.094883829 | no |
| ODAM      | 0.071366332  | 1.888941706  | 0.059314543 | 0.094927685 | no |
| ZNF229    | -0.071350319 | -1.888515695 | 0.05937175  | 0.095011717 | no |
| EXOSC4    | -0.071331823 | -1.888023647 | 0.059437881 | 0.095110018 | no |
| COQ6      | -0.071310278 | -1.887450458 | 0.059514994 | 0.095225875 | no |
| CPSF3L    | -0.07130504  | -1.88731112  | 0.059533753 | 0.095248351 | no |
| SPDYE7P   | -0.071300136 | -1.887180663 | 0.05955132  | 0.095264875 | no |
| NELL2     | -0.071299526 | -1.887164441 | 0.059553505 | 0.095264875 | no |
| SMCHD1    | -0.07126594  | -1.886270918 | 0.059673945 | 0.095449985 | no |
| HSD17B6   | -0.071242345 | -1.885643225 | 0.059758674 | 0.09557795  | no |
| ZNF836    | 0.07123789   | 1.885524715  | 0.059774682 | 0.095592822 | no |
| TMEM128   | 0.071237126  | 1.88550439   | 0.059777428 | 0.095592822 | no |
| HIST2H2BE | 0.071221557  | 1.885090202  | 0.059833407 | 0.095674772 | no |
| PRPH2     | -0.071213897 | -1.884886437 | 0.059860962 | 0.095709027 | no |
| RADIL     | -0.071212971 | -1.884861784 | 0.059864297 | 0.095709027 | no |
| TUBB4Q    | 0.071195569  | 1.884398866  | 0.05992694  | 0.095801603 | no |

|          |              |              |             |             |    |
|----------|--------------|--------------|-------------|-------------|----|
| OPN4     | -0.071177592 | -1.883920627 | 0.059991713 | 0.095897569 | no |
| BAZ1B    | 0.071159726  | 1.883445326  | 0.060056146 | 0.095989162 | no |
| CCDC85B  | -0.071157916 | -1.883397177 | 0.060062677 | 0.095989162 | no |
| SLC28A2  | -0.071157756 | -1.883392916 | 0.060063255 | 0.095989162 | no |
| KRT39    | 0.071124305  | 1.882503047  | 0.060184055 | 0.096174614 | no |
| KCNQ10T1 | -0.071112707 | -1.882194524 | 0.060225984 | 0.096234011 | no |
| CEP70    | -0.071097373 | -1.881786603 | 0.060281459 | 0.096314854 | no |
| FAM74A1  | 0.071096089  | 1.881752447  | 0.060286105 | 0.096314854 | no |
| NAA25    | -0.071091383 | -1.881627243 | 0.060303142 | 0.09633446  | no |
| C9orf150 | 0.07107828   | 1.881278674  | 0.060350593 | 0.096402646 | no |
| SNORA28  | 0.071072902  | 1.881135612  | 0.060370077 | 0.096426151 | no |
| DBF4     | 0.071071256  | 1.881091833  | 0.060376041 | 0.096428059 | no |
| DNA2     | -0.07105864  | -1.880756213 | 0.060421775 | 0.096493478 | no |
| MRPL50   | 0.071036236  | 1.880160218  | 0.060503059 | 0.096615659 | no |
| ITM2C    | 0.071032734  | 1.880067069  | 0.060515772 | 0.096628327 | no |
| PGLS     | 0.071030081  | 1.879996494  | 0.060525405 | 0.096636076 | no |
| CCDC92   | -0.07102541  | -1.879872244 | 0.060542367 | 0.096655526 | no |
| KRTAP5-4 | -0.07094647  | -1.877772304 | 0.060829647 | 0.097106499 | no |
| C8orf31  | -0.070939621 | -1.877590124 | 0.060854623 | 0.0971387   | no |
| NPHS2    | 0.070934966  | 1.877466281  | 0.060871607 | 0.097158139 | no |
| TAF1A    | 0.070931509  | 1.877374317  | 0.060884221 | 0.097170601 | no |
| RHBDD2   | 0.070921258  | 1.877101635  | 0.060921635 | 0.09722264  | no |
| SBDSP1   | 0.070899074  | 1.876511525  | 0.06100267  | 0.097344276 | no |
| IFT46    | 0.07088728   | 1.87619779   | 0.061045788 | 0.097405394 | no |
| HAP1     | 0.070884923  | 1.876135076  | 0.06105441  | 0.097411464 | no |
| FZD8     | 0.070876788  | 1.875918688  | 0.061084168 | 0.097451252 | no |
| FAM189A1 | -0.070872015 | -1.875791711 | 0.061101636 | 0.097471428 | no |
| VBP1     | -0.070844443 | -1.875058285 | 0.061202611 | 0.097624804 | no |
| TCP11    | -0.070823413 | -1.874498871 | 0.061279722 | 0.097740093 | no |
| LYZL2    | 0.070821874  | 1.874457925  | 0.061285369 | 0.097741389 | no |
| CCDC36   | 0.070802345  | 1.873938455  | 0.061357051 | 0.097847994 | no |
| CD81     | 0.070786317  | 1.873512105  | 0.061415936 | 0.097934175 | no |
| ID1      | -0.070772101 | -1.873133393 | 0.061468207 | 0.098009795 | no |
| COL16A1  | 0.07076666   | 1.872989214  | 0.061488219 | 0.098033972 | no |
| TUSC1    | 0.070747357  | 1.872475756  | 0.061559266 | 0.098139507 | no |
| TIAF1    | -0.070717291 | -1.871675997 | 0.061670064 | 0.098308393 | no |
| C10orf93 | 0.070713717  | 1.871580913  | 0.061683248 | 0.098321657 | no |
| SLC12A9  | 0.070704426  | 1.871333771  | 0.061717526 | 0.098368541 | no |
| PRKAR2B  | -0.070702882 | -1.871292706 | 0.061723223 | 0.098369866 | no |
| KLHL31   | -0.070691093 | -1.870979129 | 0.061766742 | 0.098426471 | no |
| PSMB11   | -0.070690529 | -1.870964125 | 0.061768825 | 0.098426471 | no |
| DRD4     | -0.070689305 | -1.870931567 | 0.061773345 | 0.098426471 | no |
| PPP3CC   | -0.070681766 | -1.870731033 | 0.061801192 | 0.09846308  | no |
| ADAMTS18 | 0.070668372  | 1.870374752  | 0.061850691 | 0.098531652 | no |
| MYC      | -0.070667483 | -1.870351102 | 0.061853978 | 0.098531652 | no |
| CHST15   | -0.070656555 | -1.870060428 | 0.061894388 | 0.098581615 | no |
| UBE2C    | 0.070656365  | 1.870055351  | 0.061895094 | 0.098581615 | no |
| PLK1     | 0.070651305  | 1.869920765  | 0.061913812 | 0.09860366  | no |
| GATA5    | -0.070645255 | -1.869759843 | 0.0619362   | 0.098627582 | no |
| C9orf119 | 0.070644609  | 1.869742665  | 0.06193859  | 0.098627582 | no |
| IAPP     | -0.070635928 | -1.869511741 | 0.061970728 | 0.098670986 | no |

|             |              |              |             |             |    |
|-------------|--------------|--------------|-------------|-------------|----|
| SLC39A13    | 0.070579291  | 1.868005239  | 0.062180732 | 0.098997563 | no |
| ZNF324B     | -0.070563126 | -1.867575256 | 0.06224078  | 0.099085361 | no |
| RGPD3       | -0.070550669 | -1.867243911 | 0.062287085 | 0.09915127  | no |
| VPS13C      | 0.070536293  | 1.86686153   | 0.062340558 | 0.09922682  | no |
| DDX5        | 0.070535271  | 1.866834341  | 0.062344361 | 0.09922682  | no |
| FAM89B      | -0.070532411 | -1.866758257 | 0.062355006 | 0.09923595  | no |
| LAS1L       | -0.070517998 | -1.866374903 | 0.062408663 | 0.099312609 | no |
| CAMK2N1     | -0.070516834 | -1.866343939 | 0.062412999 | 0.099312609 | no |
| MUSK        | 0.070506024  | 1.866056398  | 0.062453273 | 0.099368873 | no |
| INE1        | -0.070504254 | -1.866009314 | 0.06245987  | 0.099371549 | no |
| TNK1        | -0.070469076 | -1.86507362  | 0.062591087 | 0.099572476 | no |
| GRPEL2      | 0.070455142  | 1.864703018  | 0.062643122 | 0.099642056 | no |
| LGR6        | 0.070454725  | 1.864691912  | 0.062644682 | 0.099642056 | no |
| GEMIN4      | -0.070444488 | -1.864419634 | 0.062682935 | 0.099695058 | no |
| HCG2P7      | -0.07044301  | -1.864380321 | 0.06268846  | 0.099696002 | no |
| KIAA0406    | 0.070422332  | 1.863830301  | 0.062765798 | 0.099811146 | no |
| C9orf41     | 0.070416407  | 1.863672726  | 0.062787969 | 0.09983855  | no |
| CCDC68      | -0.070402718 | -1.86330861  | 0.062839226 | 0.099912195 | no |
| USP37       | -0.070394932 | -1.86310151  | 0.062868395 | 0.099950713 | no |
| LCN2        | 0.070377155  | 1.862628678  | 0.062935033 | 0.100043662 | no |
| RASAL2      | -0.070376696 | -1.86261646  | 0.062936756 | 0.100043662 | no |
| SCARNA20    | 0.070334229  | 1.861486942  | 0.063096185 | 0.100289203 | no |
| LHX1        | -0.070315629 | -1.860992226 | 0.063166118 | 0.100392467 | no |
| TRMT112     | 0.070302062  | 1.860631373  | 0.063217168 | 0.100465706 | no |
| CALCA       | 0.070297091  | 1.860499155  | 0.063235882 | 0.100487547 | no |
| ZDHHC21     | -0.070291148 | -1.860341083 | 0.063258261 | 0.100515209 | no |
| CC2D2B      | 0.07028884   | 1.860279692  | 0.063266954 | 0.100521122 | no |
| LZTFL1      | 0.070281543  | 1.860085617  | 0.063294443 | 0.100556895 | no |
| PDHB        | -0.070279998 | -1.860044507 | 0.063300267 | 0.100558245 | no |
| ZNF354C     | -0.070257076 | -1.859434849 | 0.063386688 | 0.100687622 | no |
| PSMD7       | 0.070241056  | 1.85900875   | 0.063447147 | 0.100775742 | no |
| COL20A1     | -0.070239133 | -1.858957618 | 0.063454405 | 0.100779353 | no |
| ISG20L2     | 0.070230324  | 1.858723312  | 0.063487674 | 0.100824271 | no |
| FAM21B      | -0.070221273 | -1.858482573 | 0.063521872 | 0.100868417 | no |
| DHX34       | 0.070220326  | 1.858457387  | 0.06352545  | 0.100868417 | no |
| C20orf199   | -0.07021577  | -1.858336219 | 0.063542669 | 0.100887835 | no |
| ENTPD5      | 0.070188387  | 1.857607896  | 0.06364625  | 0.101044357 | no |
| LEMD1       | 0.070184157  | 1.857495404  | 0.063662261 | 0.10106184  | no |
| IMMP2L      | 0.070167218  | 1.857044865  | 0.06372642  | 0.101149607 | no |
| C6orf1      | 0.070166918  | 1.857036899  | 0.063727554 | 0.101149607 | no |
| CCDC76      | 0.070162876  | 1.856929391  | 0.063742872 | 0.101165978 | no |
| PKD1L2      | 0.070140907  | 1.856345075  | 0.063826178 | 0.101290241 | no |
| OR2T8       | -0.07013406  | -1.856162976 | 0.063852159 | 0.101323518 | no |
| C4orf23     | 0.070126386  | 1.855958866  | 0.06388129  | 0.101361789 | no |
| TSNAX-DISC1 | 0.070096079  | 1.855152817  | 0.063996438 | 0.101534051 | no |
| TMEM115     | 0.070092465  | 1.855056688  | 0.064010183 | 0.101534051 | no |
| EXO1        | 0.070091418  | 1.855028844  | 0.064014164 | 0.101534051 | no |
| HNRNPC      | -0.070091417 | -1.855028806 | 0.064014169 | 0.101534051 | no |
| SPR         | 0.070091208  | 1.855023249  | 0.064014964 | 0.101534051 | no |
| SPRYD4      | 0.070083349  | 1.854814246  | 0.064044857 | 0.101573495 | no |
| EPB41L2     | 0.070074248  | 1.854572188  | 0.064079491 | 0.101620453 | no |

|              |              |              |             |             |    |
|--------------|--------------|--------------|-------------|-------------|----|
| KDM5A        | 0.070069715  | 1.854451612  | 0.064096749 | 0.101639849 | no |
| HTRA1        | -0.070065098 | -1.854328829 | 0.064114327 | 0.10165975  | no |
| GHR          | 0.070036123  | 1.85355819   | 0.064224746 | 0.101826844 | no |
| GSTA3        | 0.070030428  | 1.853406737  | 0.064246465 | 0.101853292 | no |
| ASCL3        | -0.070028603 | -1.853358193 | 0.064253428 | 0.101856344 | no |
| ORC4L        | -0.070026318 | -1.853297418 | 0.064262146 | 0.101862177 | no |
| GNPTG        | -0.070004063 | -1.85270554  | 0.064347099 | 0.101988841 | no |
| ETFDH        | 0.069980194  | 1.852070704  | 0.064438321 | 0.102122271 | no |
| H2AFZ        | 0.069979393  | 1.852049394  | 0.064441385 | 0.102122271 | no |
| PPL          | 0.06994469   | 1.851126443  | 0.064574204 | 0.102324733 | no |
| C17orf79     | 0.069942458  | 1.851067078  | 0.064582755 | 0.102330262 | no |
| GALK2        | 0.069920878  | 1.850493165  | 0.064665468 | 0.10245329  | no |
| NSFL1C       | -0.069913735 | -1.850303183 | 0.064692868 | 0.10248867  | no |
| SUV39H2      | -0.069879206 | -1.84938486  | 0.064825446 | 0.102690659 | no |
| LRP12        | 0.069854369  | 1.848724334  | 0.064920946 | 0.102833883 | no |
| FRMD4A       | -0.069846121 | -1.848504978 | 0.064952686 | 0.102876099 | no |
| C18orf1      | -0.069839476 | -1.848328241 | 0.064978269 | 0.102908557 | no |
| EPR1         | 0.069835144  | 1.848213024  | 0.064994951 | 0.102926915 | no |
| LCN8         | -0.069800976 | -1.847304344 | 0.065126642 | 0.103127385 | no |
| MS4A3        | 0.069797999  | 1.847225175  | 0.065138126 | 0.103137492 | no |
| TMEM223      | 0.069788168  | 1.846963711  | 0.065176066 | 0.103189483 | no |
| SAR1A        | -0.069784443 | -1.846864647 | 0.065190445 | 0.103204167 | no |
| GOLGA6A      | -0.069781587 | -1.846788686 | 0.065201473 | 0.103213543 | no |
| OR5K1        | -0.069772654 | -1.846551114 | 0.065235972 | 0.103260071 | no |
| GFRA2        | 0.069761867  | 1.846264243  | 0.065277651 | 0.103317823 | no |
| RAB9A        | 0.069760566  | 1.84622965   | 0.065282678 | 0.103317823 | no |
| LOC100287718 | 0.069746187  | 1.845847243  | 0.065338274 | 0.103397717 | no |
| LATS1        | -0.06973486  | -1.845545993 | 0.065382099 | 0.103458972 | no |
| RHO          | -0.069708274 | -1.844838956 | 0.065485053 | 0.103613773 | no |
| COX6B2       | 0.069706645  | 1.844795648  | 0.065491363 | 0.103615649 | no |
| TMC06        | 0.069705075  | 1.844753881  | 0.065497449 | 0.10361717  | no |
| MLL4         | -0.069669374 | -1.843804448 | 0.065635931 | 0.103828123 | no |
| MIER3        | -0.069662308 | -1.843616522 | 0.06566337  | 0.103863402 | no |
| C1orf109     | 0.069653736  | 1.843388567  | 0.065696666 | 0.103907939 | no |
| OR12D2       | 0.069625341  | 1.842633434  | 0.065807064 | 0.104067331 | no |
| PCNXL3       | -0.069625168 | -1.842628833 | 0.065807737 | 0.104067331 | no |
| FM05         | 0.069623051  | 1.842572533  | 0.065815974 | 0.104072217 | no |
| NPY2R        | 0.069509294  | 1.839547328  | 0.066259837 | 0.104765886 | no |
| HPRT1        | 0.069491108  | 1.839063708  | 0.066331023 | 0.10487024  | no |
| CCDC14       | -0.069484667 | -1.838892414 | 0.066356252 | 0.104901924 | no |
| DHRS4L1      | -0.069481758 | -1.838815044 | 0.06636765  | 0.104911739 | no |
| LOC144438    | 0.069452411  | 1.838034629  | 0.066482708 | 0.105085403 | no |
| C1orf89      | -0.069435111 | -1.837574563 | 0.066550614 | 0.105184514 | no |
| HSPA8        | 0.069431241  | 1.837471661  | 0.06656581  | 0.105200308 | no |
| ZSWIM4       | -0.069429879 | -1.837435448 | 0.066571158 | 0.105200537 | no |
| NUDT2        | -0.069405735 | -1.836793382 | 0.066666047 | 0.105342254 | no |
| FOXP2        | -0.069376905 | -1.836026714 | 0.066779496 | 0.105513274 | no |
| INSL3        | 0.069363373  | 1.835666863  | 0.066832801 | 0.105589245 | no |
| SCLT1        | 0.069337474  | 1.834978161  | 0.066934916 | 0.105742313 | no |
| CRCP         | 0.069333635  | 1.834876059  | 0.066950066 | 0.105757983 | no |
| COPS6        | 0.069323443  | 1.834605047  | 0.066990292 | 0.105813259 | no |

|           |              |              |             |             |    |
|-----------|--------------|--------------|-------------|-------------|----|
| ATXN80S   | -0.069316797 | -1.834428316 | 0.067016535 | 0.105846441 | no |
| GLRX3     | 0.069294276  | 1.833829438  | 0.067105525 | 0.105978715 | no |
| HGFAC     | -0.069285931 | -1.83360751  | 0.067138528 | 0.106022553 | no |
| BLOC1S1   | 0.069279999  | 1.833449758  | 0.067161995 | 0.106051328 | no |
| C1orf65   | -0.069275373 | -1.83332675  | 0.067180298 | 0.106069927 | no |
| ZNF639    | -0.06927437  | -1.833300086 | 0.067184266 | 0.106069927 | no |
| PPIL4     | 0.069271577  | 1.83322581   | 0.067195321 | 0.106079097 | no |
| ZFHX4     | -0.06926891  | -1.833154897 | 0.067205876 | 0.106087477 | no |
| RNMTL1    | -0.069248601 | -1.832614829 | 0.067286311 | 0.106206154 | no |
| SEMA5A    | -0.069209242 | -1.831568227 | 0.067442411 | 0.106444236 | no |
| IDH3A     | -0.069206812 | -1.83150361  | 0.067452059 | 0.106451153 | no |
| IL2ORB    | 0.069203069  | 1.831404056  | 0.067466924 | 0.106466303 | no |
| SSTR4     | -0.069188732 | -1.831022837 | 0.067523874 | 0.106547857 | no |
| PARP1     | -0.069183739 | -1.83089004  | 0.067543722 | 0.106570858 | no |
| ARHGAP11B | 0.069176714  | 1.830703257  | 0.067571647 | 0.106606598 | no |
| IPO11     | 0.069154502  | 1.830112606  | 0.067660013 | 0.106729695 | no |
| BUD13     | -0.069154448 | -1.830111165 | 0.067660229 | 0.106729695 | no |
| NSL1      | 0.069142416  | 1.829791215  | 0.067708136 | 0.106796934 | no |
| CXorf40B  | 0.069127259  | 1.829388174  | 0.067768525 | 0.106883847 | no |
| RNF2      | 0.069104519  | 1.828783496  | 0.067859208 | 0.107018523 | no |
| TNFRSF21  | -0.069087295 | -1.828325491 | 0.067927962 | 0.107118597 | no |
| FAM101B   | 0.069054054  | 1.8274416    | 0.06806081  | 0.107311742 | no |
| SLC11A2   | -0.069053844 | -1.827435995 | 0.068061653 | 0.107311742 | no |
| FAM199X   | -0.069052175 | -1.827391636 | 0.068068326 | 0.107311742 | no |
| ZNF79     | 0.069051339  | 1.827369383  | 0.068071673 | 0.107311742 | no |
| SNTB1     | 0.069049768  | 1.827327614  | 0.068077957 | 0.107313281 | no |
| AIMP1     | 0.069026377  | 1.826705633  | 0.068171588 | 0.107452496 | no |
| ZNF782    | -0.069015915 | -1.826427438 | 0.068213501 | 0.107510178 | no |
| OR52D1    | 0.068979859  | 1.825468702  | 0.068358107 | 0.107729691 | no |
| N4BP3     | -0.06895805  | -1.824888809 | 0.068445694 | 0.107859318 | no |
| AVPR1A    | 0.068948007  | 1.824621751  | 0.068486062 | 0.107906788 | no |
| PPP1R3C   | -0.0689479   | -1.824618903 | 0.068486493 | 0.107906788 | no |
| TUBA4A    | -0.068942881 | -1.824485457 | 0.068506671 | 0.107930171 | no |
| LOC285205 | 0.068940049  | 1.824410144  | 0.068518062 | 0.107939705 | no |
| TEX13A    | 0.068931491  | 1.824182594  | 0.068552486 | 0.107985522 | no |
| C1orf213  | -0.068914097 | -1.823720083 | 0.0686225   | 0.108087388 | no |
| MT1G      | 0.068910858  | 1.823633962  | 0.068635544 | 0.108099511 | no |
| UBR7      | -0.0689034   | -1.823435664 | 0.068665585 | 0.108138401 | no |
| ERBB3     | -0.068894834 | -1.823207894 | 0.068700103 | 0.108184336 | no |
| CATSPER4  | -0.068891643 | -1.823123044 | 0.068712966 | 0.108196165 | no |
| TSIX      | -0.068886287 | -1.822980629 | 0.06873456  | 0.108221738 | no |
| COX7A2L   | 0.068866676  | 1.822459178  | 0.068813673 | 0.108337864 | no |
| CLMN      | 0.068856385  | 1.822185538  | 0.068855219 | 0.108394832 | no |
| COX8C     | -0.068852679 | -1.822086996 | 0.068870186 | 0.108409951 | no |
| FBXL7     | 0.06884755   | 1.821950612  | 0.068890904 | 0.108434122 | no |
| SLC4A5    | -0.068840662 | -1.821767478 | 0.068918732 | 0.108469479 | no |
| RAB3IL1   | 0.068838571  | 1.821711873  | 0.068927183 | 0.108474336 | no |
| ZNF583    | 0.068833578  | 1.821579113  | 0.068947365 | 0.108497651 | no |
| C1orf185  | 0.068812926  | 1.821029974  | 0.069030893 | 0.108620639 | no |
| SLC35A1   | 0.068803394  | 1.820776538  | 0.069069471 | 0.108672884 | no |
| MMACHC    | 0.068801193  | 1.820718016  | 0.069078381 | 0.108678447 | no |

|              |              |              |             |             |    |
|--------------|--------------|--------------|-------------|-------------|----|
| FAU          | -0.0687826   | -1.820223622 | 0.069153697 | 0.108788472 | no |
| HBG1         | 0.068770514  | 1.819902278  | 0.069202686 | 0.108857069 | no |
| ASPM         | 0.068760547  | 1.819637252  | 0.069243111 | 0.108912184 | no |
| KIF14        | 0.068758073  | 1.819571478  | 0.069253146 | 0.108919495 | no |
| ZNF180       | 0.068754342  | 1.819472288  | 0.069268283 | 0.108931227 | no |
| C17orf47     | 0.068753579  | 1.819451989  | 0.069271381 | 0.108931227 | no |
| C18orf45     | 0.068740651  | 1.819108234  | 0.069323861 | 0.109005275 | no |
| FLJ33360     | -0.068722941 | -1.81863736  | 0.069395802 | 0.109109909 | no |
| CCDC42B      | 0.068691928  | 1.817812755  | 0.069521933 | 0.109299723 | no |
| AKR7A2       | 0.068677493  | 1.817428952  | 0.069580704 | 0.109383615 | no |
| ZFPM1        | -0.068673475 | -1.817322124 | 0.069597069 | 0.109400836 | no |
| LIMD1        | 0.068669537  | 1.817217405  | 0.069613115 | 0.109417551 | no |
| CHMP6        | -0.068663406 | -1.817054392 | 0.069638099 | 0.109448311 | no |
| TRPM6        | 0.068657489  | 1.816897075  | 0.069662216 | 0.109477706 | no |
| ESCO2        | 0.068645354  | 1.816574416  | 0.069711704 | 0.109546963 | no |
| PCDHGB5      | -0.068637098 | -1.816354893 | 0.069745389 | 0.109590468 | no |
| IL20RA       | 0.068635546  | 1.816313638  | 0.069751721 | 0.109590468 | no |
| B3GAT2       | -0.068634583 | -1.81628804  | 0.06975565  | 0.109590468 | no |
| ING4         | -0.068624781 | -1.816027428 | 0.069795663 | 0.109644811 | no |
| PITPNM2      | -0.068602259 | -1.815428604 | 0.069887674 | 0.109780825 | no |
| PLEKHA1      | -0.06859858  | -1.815330767 | 0.069902717 | 0.109795923 | no |
| EIF2C2       | 0.068588003  | 1.815049556  | 0.069945968 | 0.109855323 | no |
| RALY         | 0.068577734  | 1.814776522  | 0.069987982 | 0.109912772 | no |
| PVRL3        | 0.068567838  | 1.814513401  | 0.070028491 | 0.109967847 | no |
| LOC441177    | 0.068557893  | 1.814248985  | 0.070069218 | 0.110023257 | no |
| LASP1        | 0.068549893  | 1.814036293  | 0.070101993 | 0.110066172 | no |
| RAD51AP1     | 0.068547857  | 1.813982143  | 0.070110339 | 0.110070728 | no |
| CPSF4L       | 0.068536837  | 1.813689141  | 0.070155514 | 0.110133099 | no |
| CYP3A4       | -0.068502485 | -1.812775814 | 0.070296485 | 0.110345833 | no |
| GPS2         | -0.068492785 | -1.8125179   | 0.070336335 | 0.110399816 | no |
| OTUD3        | -0.06848038  | -1.8121881   | 0.07038732  | 0.110471266 | no |
| SCUBE3       | 0.068470918  | 1.811936524  | 0.070426233 | 0.110523758 | no |
| CC2D1A       | 0.068455177  | 1.81151801   | 0.070491006 | 0.110616823 | no |
| PYDC2        | 0.068435787  | 1.811002487  | 0.07057086  | 0.110729959 | no |
| SND1         | 0.068435012  | 1.810981867  | 0.070574055 | 0.110729959 | no |
| MED25        | -0.068420496 | -1.810595932 | 0.070633887 | 0.110815235 | no |
| C10orf53     | -0.068396065 | -1.80994639  | 0.07073468  | 0.110964755 | no |
| ASB6         | 0.068392673  | 1.809856197  | 0.070748686 | 0.110974879 | no |
| MMP20        | 0.068391843  | 1.809834135  | 0.070752112 | 0.110974879 | no |
| WNT16        | 0.068386032  | 1.809679634  | 0.070776109 | 0.111003907 | no |
| LOC441208    | -0.068376295 | -1.809420763 | 0.070816331 | 0.111058376 | no |
| GINS1        | 0.068374311  | 1.809367993  | 0.070824533 | 0.111062624 | no |
| GLB1L2       | -0.068363999 | -1.80909384  | 0.070867155 | 0.111120842 | no |
| UPK3A        | 0.068360614  | 1.809003833  | 0.070881153 | 0.111134172 | no |
| ALDH8A1      | -0.068359097 | -1.808963522 | 0.070887423 | 0.111135384 | no |
| C9orf129     | -0.068352317 | -1.808783262 | 0.070915465 | 0.111170728 | no |
| VPS28        | -0.068344515 | -1.808575825 | 0.070947747 | 0.111212711 | no |
| PGAM2        | 0.06834004   | 1.80845684   | 0.070966269 | 0.111233121 | no |
| TOMM34       | 0.06833759   | 1.808391711  | 0.070976409 | 0.111240391 | no |
| SCNN1G       | 0.068324487  | 1.80804335   | 0.071030667 | 0.111316799 | no |
| LOC100128842 | 0.06832017   | 1.807928561  | 0.071048553 | 0.111336199 | no |

|              |              |              |             |             |    |
|--------------|--------------|--------------|-------------|-------------|----|
| C3orf1       | 0.068314977  | 1.807790494  | 0.071070071 | 0.111361288 | no |
| HES2         | 0.068311605  | 1.807700855  | 0.071084044 | 0.111374551 | no |
| UBE2D2       | 0.068307919  | 1.80760285   | 0.071099324 | 0.11138986  | no |
| BMP8A        | 0.068290639  | 1.807143428  | 0.071170989 | 0.111493496 | no |
| IFLTD1       | 0.068272231  | 1.806654029  | 0.071247395 | 0.111604543 | no |
| LHB          | 0.068245646  | 1.805947233  | 0.07135786  | 0.11176892  | no |
| SSX2IP       | 0.068243481  | 1.805889687  | 0.071366861 | 0.111774358 | no |
| FBX046       | -0.068241816 | -1.805845412 | 0.071373786 | 0.111776545 | no |
| TXNL1        | 0.068231127  | 1.805561227  | 0.071418249 | 0.111837515 | no |
| FAM38B       | 0.06821909   | 1.805241209  | 0.071468345 | 0.111907296 | no |
| HOPX         | 0.068215681  | 1.805150573  | 0.071482539 | 0.111920853 | no |
| KRTAP5-10    | -0.068170054 | -1.803937536 | 0.071672726 | 0.11220994  | no |
| RAB5A        | -0.068162571 | -1.803738594 | 0.071703956 | 0.112250142 | no |
| ELK1         | 0.068138684  | 1.803103556  | 0.071803722 | 0.11239762  | no |
| LOC100128573 | -0.068127028 | -1.802793673 | 0.071852447 | 0.112465183 | no |
| UBE3A        | -0.068125347 | -1.802748973 | 0.071859478 | 0.112467481 | no |
| CYorf15A     | 0.068099861  | 1.802071401  | 0.071966119 | 0.112625667 | no |
| ANKRD20A3    | -0.068098246 | -1.802028473 | 0.07197288  | 0.11262753  | no |
| LOC100134868 | 0.068075413  | 1.801421452  | 0.072068535 | 0.112768489 | no |
| SLITRK6      | -0.068061879 | -1.80106164  | 0.072125284 | 0.112848552 | no |
| DHX36        | -0.068054217 | -1.80085796  | 0.072157424 | 0.112890103 | no |
| DNAI1        | 0.068041846  | 1.80052907   | 0.072209348 | 0.112962596 | no |
| PPARD        | 0.068021271  | 1.799982063  | 0.072295773 | 0.113089048 | no |
| LOC338758    | -0.068009882 | -1.799679305 | 0.072343645 | 0.113149678 | no |
| LOC255167    | -0.068009387 | -1.79966615  | 0.072345726 | 0.113149678 | no |
| TMIE         | 0.067993182  | 1.799235327  | 0.072413893 | 0.113243669 | no |
| FAM185A      | 0.067991084  | 1.799179567  | 0.07242272  | 0.113243669 | no |
| NFAT5        | -0.06798997  | -1.799149927 | 0.072427412 | 0.113243669 | no |
| NUS1         | 0.067989776  | 1.799144783  | 0.072428226 | 0.113243669 | no |
| PCMTD2       | -0.067987895 | -1.799094784 | 0.072436142 | 0.113247288 | no |
| SIAE         | 0.067972445  | 1.798684038  | 0.072501198 | 0.113340233 | no |
| DNAH17       | -0.067970038 | -1.798620046 | 0.072511338 | 0.11334732  | no |
| KBTBD13      | -0.067966565 | -1.798527711 | 0.072525971 | 0.113361429 | no |
| GP2          | 0.067943242  | 1.797907696  | 0.072624291 | 0.113505527 | no |
| UPK3BL       | 0.067942034  | 1.797875561  | 0.072629389 | 0.113505527 | no |
| ZNF502       | -0.067933373 | -1.79765481  | 0.072664424 | 0.113545455 | no |
| OR2M4        | -0.067933316 | -1.797643805 | 0.072666171 | 0.113545455 | no |
| SLC38A10     | 0.067917476  | 1.797222702  | 0.072733042 | 0.113641162 | no |
| GUCY1A2      | -0.067900725 | -1.796777399 | 0.07280381  | 0.113742944 | no |
| NUSAP1       | 0.067870831  | 1.795982686  | 0.072930249 | 0.113931677 | no |
| SFRS12       | 0.067868597  | 1.795923287  | 0.072939706 | 0.113937648 | no |
| LPGAT1       | 0.067849864  | 1.795425281  | 0.073019039 | 0.11405276  | no |
| MPPE1        | 0.067834673  | 1.795021461  | 0.073083419 | 0.114144502 | no |
| DENND1B      | 0.067817185  | 1.794556559  | 0.073157596 | 0.114251528 | no |
| CREB3L3      | -0.067811087 | -1.794394431 | 0.073183479 | 0.114283121 | no |
| POLR2G       | 0.067803486  | 1.794192383  | 0.073215744 | 0.114324677 | no |
| APOH         | 0.067782208  | 1.793626728  | 0.073306138 | 0.114456986 | no |
| MRPS9        | -0.067767859 | -1.793245281 | 0.073367147 | 0.114543396 | no |
| ZFP64        | -0.067763504 | -1.79312951  | 0.073385672 | 0.114563471 | no |
| FAM90A1      | -0.067761367 | -1.793072688 | 0.073394765 | 0.114568821 | no |
| KLHL5        | -0.067710953 | -1.791732526 | 0.073609506 | 0.114895159 | no |

|              |              |              |             |             |    |
|--------------|--------------|--------------|-------------|-------------|----|
| ATF2         | -0.067687166 | -1.791100186 | 0.073711008 | 0.115044709 | no |
| GBP7         | -0.067679513 | -1.79089675  | 0.073743688 | 0.11508683  | no |
| RNASEK       | 0.067648163  | 1.790063345  | 0.073877688 | 0.115287056 | no |
| LRRC34       | 0.06763443   | 1.789698285  | 0.073936447 | 0.115369846 | no |
| TAAR8        | -0.067614886 | -1.789178755 | 0.074020136 | 0.11549152  | no |
| HGD          | 0.067601909  | 1.788833798  | 0.074075746 | 0.115569368 | no |
| HMGB3L1      | -0.067590448 | -1.788529115 | 0.074124893 | 0.11563712  | no |
| OR7A5        | 0.067587305  | 1.78844559   | 0.07413837  | 0.115642816 | no |
| SIVA1        | 0.067586929  | 1.788435595  | 0.074139983 | 0.115642816 | no |
| PCDHA3       | -0.067584136 | -1.78836133  | 0.074151968 | 0.115652588 | no |
| PIGL         | 0.067575542  | 1.788132898  | 0.074188844 | 0.115701176 | no |
| SNORA30      | 0.067574171  | 1.788096437  | 0.074194731 | 0.115701432 | no |
| AKD1         | -0.067562588 | -1.787788537 | 0.074244462 | 0.115770054 | no |
| TCEA1        | -0.067554078 | -1.78756232  | 0.074281017 | 0.115818122 | no |
| MKL1         | 0.067547484  | 1.787387032  | 0.074309352 | 0.115853368 | no |
| PRKAB1       | 0.067516139  | 1.786553815  | 0.074444163 | 0.116054598 | no |
| ODZ4         | 0.067513453  | 1.786482398  | 0.074455727 | 0.116063677 | no |
| CCDC54       | 0.067508957  | 1.786362881  | 0.074475083 | 0.1160849   | no |
| ZBTB45       | -0.067505703 | -1.786276391 | 0.074489093 | 0.116097787 | no |
| NDUFAF1      | -0.067480868 | -1.785616234 | 0.074596099 | 0.116255602 | no |
| SMO          | 0.067474579  | 1.785449052  | 0.074623218 | 0.116288902 | no |
| ANKRD13C     | -0.067467669 | -1.785265378 | 0.074653021 | 0.116326379 | no |
| TMEM101      | 0.067455558  | 1.784943426  | 0.074705285 | 0.116398847 | no |
| AGFG2        | 0.067436325  | 1.784432174  | 0.07478834  | 0.116519277 | no |
| CIAPIN1      | -0.067432596 | -1.784333072 | 0.074804448 | 0.116535393 | no |
| SCYL3        | 0.067411992  | 1.783785366  | 0.074893525 | 0.116665173 | no |
| DTNA         | 0.067389522  | 1.783188081  | 0.074990764 | 0.116807648 | no |
| UBL5         | 0.067374122  | 1.782778719  | 0.075057468 | 0.116902542 | no |
| MTCP1NB      | 0.06736014   | 1.782407064  | 0.075118071 | 0.116987254 | no |
| RELN         | -0.067358904 | -1.782374207 | 0.075123431 | 0.116987254 | no |
| OR52N4       | 0.067347344  | 1.782066926  | 0.075173569 | 0.117056317 | no |
| CLDN12       | 0.067335476  | 1.781751459  | 0.075225072 | 0.117127494 | no |
| PEAR1        | 0.067334114  | 1.781715255  | 0.075230985 | 0.117127679 | no |
| TRIM69       | 0.06732438   | 1.781456507  | 0.075273252 | 0.117184462 | no |
| CXorf58      | 0.067290452  | 1.780554655  | 0.075420724 | 0.117405004 | no |
| GSG1         | 0.067283148  | 1.780360528  | 0.075452498 | 0.117445424 | no |
| LY6G6F       | 0.067275369  | 1.780153753  | 0.075486355 | 0.117489079 | no |
| BCL2L13      | 0.067271964  | 1.780063227  | 0.075501182 | 0.117503109 | no |
| C9orf152     | 0.067267612  | 1.779947544  | 0.075520132 | 0.117523555 | no |
| PATE4        | -0.067262511 | -1.779811972 | 0.075542345 | 0.117549075 | no |
| ZCRB1        | -0.067258348 | -1.779701294 | 0.075560484 | 0.117568252 | no |
| C3orf57      | 0.067256797  | 1.779660085  | 0.075567238 | 0.117569713 | no |
| AGAP7        | -0.067203031 | -1.778230947 | 0.075801788 | 0.117925198 | no |
| ZNF143       | -0.067201749 | -1.778196862 | 0.07580739  | 0.117925198 | no |
| UNC119       | -0.067153052 | -1.776902473 | 0.076020351 | 0.118247381 | no |
| TTY1B        | 0.067131814  | 1.77633795   | 0.076113383 | 0.118382982 | no |
| TMEM89       | 0.06712792   | 1.776234446  | 0.076130451 | 0.118400419 | no |
| TMEM52       | 0.067088602  | 1.775189391  | 0.076302951 | 0.118659569 | no |
| ZCCHC4       | 0.067082228  | 1.77501996   | 0.076330947 | 0.118693977 | no |
| C2CD4B       | 0.067079148  | 1.774938089  | 0.076344479 | 0.118705889 | no |
| LOC100128554 | -0.067057091 | -1.774351823 | 0.076441433 | 0.118847499 | no |



|           |              |              |             |             |    |
|-----------|--------------|--------------|-------------|-------------|----|
| MPP5      | -0.06704767  | -1.774101404 | 0.076482876 | 0.118902791 | no |
| SHMT2     | -0.067035143 | -1.773768452 | 0.076538007 | 0.118979351 | no |
| CD5L      | 0.067025436  | 1.773510434  | 0.076580753 | 0.119036647 | no |
| GOLGA7    | 0.067019155  | 1.773343503  | 0.076608419 | 0.119070496 | no |
| HEMK1     | 0.066996529  | 1.772742115  | 0.076708156 | 0.119211786 | no |
| PLCH1     | -0.066995858 | -1.772724277 | 0.076711115 | 0.119211786 | no |
| HHATL     | -0.066993123 | -1.772651566 | 0.076723182 | 0.119215864 | no |
| PHYH      | 0.06699259   | 1.772637399  | 0.076725533 | 0.119215864 | no |
| LHX6      | -0.066951523 | -1.771545869 | 0.076906861 | 0.119488429 | no |
| RPL34     | -0.066943419 | -1.771330484 | 0.076942683 | 0.119534898 | no |
| ACACB     | 0.066937544  | 1.771174316  | 0.076968665 | 0.119566075 | no |
| UBE2Q2    | 0.066931711  | 1.771019292  | 0.076994463 | 0.119589427 | no |
| ELP2      | 0.066931471  | 1.771012899  | 0.076995527 | 0.119589427 | no |
| CHST10    | -0.066918218 | -1.770660649 | 0.077054174 | 0.119671323 | no |
| TPX2      | 0.066914838  | 1.770570816  | 0.077069136 | 0.119685367 | no |
| ITIH3     | 0.066910539  | 1.770456561  | 0.07708817  | 0.119705731 | no |
| LYG2      | 0.066888184  | 1.769862389  | 0.077187213 | 0.119850324 | no |
| FAM71B    | 0.06688228   | 1.769705441  | 0.077213392 | 0.119881766 | no |
| NCOR1     | -0.066878757 | -1.769611821 | 0.077229011 | 0.119891819 | no |
| FAM179B   | -0.066878145 | -1.769595546 | 0.077231727 | 0.119891819 | no |
| SHH       | 0.066873611  | 1.769475047  | 0.077251835 | 0.119913827 | no |
| LONP2     | -0.066854892 | -1.76897751  | 0.077334907 | 0.120033559 | no |
| C11orf82  | 0.066835516  | 1.768462527  | 0.077420968 | 0.120151185 | no |
| C19orf61  | 0.066835154  | 1.768452908  | 0.077422576 | 0.120151185 | no |
| GRSF1     | 0.066806653  | 1.767695385  | 0.077549313 | 0.120338631 | no |
| HOTAIR    | 0.066796237  | 1.767418538  | 0.077595674 | 0.12040133  | no |
| RBP4      | -0.06679073  | -1.767272167 | 0.077620194 | 0.120430134 | no |
| C1orf105  | -0.066778231 | -1.766939979 | 0.077675865 | 0.120507263 | no |
| C16orf58  | -0.066763575 | -1.766550453 | 0.077741188 | 0.120599351 | no |
| CDADC1    | -0.066756178 | -1.766353854 | 0.077774174 | 0.120637947 | no |
| BCOR      | -0.06675532  | -1.766331045 | 0.077778002 | 0.120637947 | no |
| RG9MTD1   | 0.066750139  | 1.766193337  | 0.077801115 | 0.12066454  | no |
| PRIMA1    | 0.066732527  | 1.765725237  | 0.077879723 | 0.12077719  | no |
| MGC27382  | 0.066729531  | 1.765645604  | 0.077893102 | 0.120788674 | no |
| PTX4      | 0.06671169   | 1.76517143   | 0.077972807 | 0.120903    | no |
| SPERT     | 0.06670954   | 1.765114306  | 0.077982414 | 0.120908622 | no |
| BAALC     | -0.066707619 | -1.765063249 | 0.077991001 | 0.120912664 | no |
| KRIT1     | 0.06669082   | 1.76461676   | 0.078066127 | 0.121019856 | no |
| C19orf47  | 0.066661426  | 1.763835527  | 0.07819772  | 0.12121456  | no |
| LNX2      | 0.066658263  | 1.763751452  | 0.078211893 | 0.121227235 | no |
| C16orf81  | -0.066645233 | -1.763405155 | 0.07827029  | 0.12130845  | no |
| PTPRU     | 0.066610346  | 1.762477957  | 0.078426823 | 0.121541738 | no |
| SUPT4H1   | 0.066593754  | 1.762036975  | 0.078501361 | 0.121647928 | no |
| CRNKL1    | 0.06657105   | 1.76143357   | 0.078603446 | 0.121796786 | no |
| LOC286094 | -0.066553665 | -1.760971506 | 0.078681692 | 0.121908686 | no |
| ZNHIT6    | 0.066523551  | 1.760171182  | 0.078817369 | 0.122109545 | no |
| C6orf218  | -0.066490327 | -1.75928818  | 0.078967284 | 0.12233243  | no |
| OR8D4     | -0.066474863 | -1.75887721  | 0.079037137 | 0.122431262 | no |
| ANAPC16   | 0.066472603  | 1.758817147  | 0.07904735  | 0.122437702 | no |
| TGM4      | 0.066463314  | 1.758570257  | 0.079089343 | 0.122493361 | no |
| ADRA1A    | -0.066447864 | -1.758159663 | 0.07915922  | 0.122592195 | no |

|           |              |              |             |             |    |
|-----------|--------------|--------------|-------------|-------------|----|
| ARID3B    | 0.066437042  | 1.757872039  | 0.079208199 | 0.122658653 | no |
| NGFR      | 0.06642996   | 1.757683844  | 0.07924026  | 0.122698903 | no |
| TLE2      | -0.066414934 | -1.757284501 | 0.079308327 | 0.122794897 | no |
| TTC9C     | 0.066411378  | 1.757190001  | 0.079324442 | 0.122810442 | no |
| THAP3     | -0.066398929 | -1.756859145 | 0.079380881 | 0.122888411 | no |
| KIAA2018  | -0.066394577 | -1.75674347  | 0.079400621 | 0.122909559 | no |
| MTMR6     | 0.066392383  | 1.756685179  | 0.07941057  | 0.122914615 | no |
| C16orf13  | -0.066391176 | -1.756653098 | 0.079416046 | 0.122914615 | no |
| SRM       | 0.06637538   | 1.756233299  | 0.079487731 | 0.123016146 | no |
| LOC401052 | 0.066353489  | 1.755651515  | 0.079587163 | 0.123160601 | no |
| LRIT3     | -0.066342052 | -1.755347563 | 0.079639151 | 0.123231621 | no |
| ZIC1      | 0.066329251  | 1.755007375  | 0.07969737  | 0.12331227  | no |
| ID3       | 0.066320574  | 1.754776772  | 0.079736855 | 0.123363922 | no |
| TMEM184A  | 0.066316133  | 1.754658759  | 0.079757068 | 0.123385752 | no |
| IL12RB2   | 0.066304907  | 1.754360414  | 0.079808185 | 0.123455386 | no |
| RGS9BP    | -0.06629912  | -1.754206608 | 0.079834549 | 0.123486719 | no |
| LOC641367 | 0.066294749  | 1.754090439  | 0.079854465 | 0.123508077 | no |
| MSX1      | 0.066283273  | 1.753785473  | 0.07990677  | 0.123579521 | no |
| FAM21C    | -0.066281637 | -1.753741998 | 0.079914229 | 0.123581603 | no |
| HSPA4L    | 0.066246934  | 1.752819726  | 0.080072589 | 0.123817025 | no |
| FBXL22    | -0.066224069 | -1.752212086 | 0.080177064 | 0.123969095 | no |
| PLCD1     | 0.066222627  | 1.752173759  | 0.080183658 | 0.123969809 | no |
| HAUS6     | -0.066218646 | -1.752067972 | 0.080201859 | 0.123988468 | no |
| TUBD1     | 0.066194543  | 1.75142743   | 0.080312139 | 0.124149463 | no |
| WDR43     | 0.066189994  | 1.751306536  | 0.080332967 | 0.124172166 | no |
| ZNHIT3    | -0.066185852 | -1.751196466 | 0.080351934 | 0.124191988 | no |
| ZNF331    | 0.06616305   | 1.750590497  | 0.080456418 | 0.124343973 | no |
| DOCK6     | 0.06613855   | 1.749939399  | 0.080568806 | 0.12450815  | no |
| CDC45     | 0.066124772  | 1.749573268  | 0.080632061 | 0.124596378 | no |
| CCDC93    | -0.066123169 | -1.749530669 | 0.080639424 | 0.124598232 | no |
| ZFYVE28   | 0.066108745  | 1.749147348  | 0.080705697 | 0.124688098 | no |
| C1QL1     | -0.066107827 | -1.749122937 | 0.080709919 | 0.124688098 | no |
| C15orf28  | -0.066072127 | -1.748174231 | 0.080874141 | 0.124932257 | no |
| PCDHA7    | -0.066052055 | -1.747640823 | 0.080966594 | 0.12506552  | no |
| HIPK1     | 0.06603214   | 1.747111597  | 0.081058407 | 0.125197774 | no |
| RAB2B     | -0.066026827 | -1.746970414 | 0.081082914 | 0.12522606  | no |
| LY6D      | -0.066017602 | -1.746725261 | 0.081125484 | 0.125282235 | no |
| C12orf23  | 0.066005921  | 1.746414852  | 0.081179411 | 0.12535594  | no |
| CYP26C1   | -0.065961599 | -1.745237017 | 0.0813843   | 0.125662729 | no |
| DDIT4     | -0.065932377 | -1.744460477 | 0.081519612 | 0.125862048 | no |
| CTR2      | 0.065900855  | 1.743622833  | 0.081665777 | 0.126078091 | no |
| CENPBD1   | -0.065898364 | -1.743556619 | 0.08167734  | 0.126086314 | no |
| CCDC147   | 0.065889295  | 1.743315638  | 0.081719434 | 0.126133234 | no |
| PRDM14    | 0.065889128  | 1.74331119   | 0.081720211 | 0.126133234 | no |
| NPIPL3    | -0.065886871 | -1.743251214 | 0.081730691 | 0.126139779 | no |
| CNPY1     | 0.065873976  | 1.742908544  | 0.081790585 | 0.126222582 | no |
| FBXL6     | -0.065857538 | -1.742471751 | 0.081866982 | 0.126330839 | no |
| GPR182    | -0.065849142 | -1.74224864  | 0.081906028 | 0.126381445 | no |
| DPP8      | -0.065832204 | -1.741798518 | 0.081984848 | 0.126493411 | no |
| GSG2      | 0.06581474   | 1.741334464  | 0.082066172 | 0.126609223 | no |
| CACHD1    | 0.065804595  | 1.741064876  | 0.082113447 | 0.126672491 | no |

|              |              |              |             |             |    |
|--------------|--------------|--------------|-------------|-------------|----|
| RFPL3S       | -0.065795258 | -1.740816755 | 0.082156977 | 0.126729973 | no |
| KIF2C        | 0.06579305   | 1.740758084  | 0.082167273 | 0.126736185 | no |
| C3orf77      | -0.065791603 | -1.740719631 | 0.082174021 | 0.126736926 | no |
| ERC1         | -0.065789586 | -1.740666019 | 0.082183431 | 0.12674177  | no |
| LOC100270746 | -0.06577775  | -1.740344858 | 0.082239817 | 0.126819054 | no |
| NCRNA00107   | -0.06577449  | -1.740264871 | 0.082253865 | 0.126831044 | no |
| ACTRT1       | -0.06577206  | -1.740200314 | 0.082265205 | 0.126838855 | no |
| PBK          | 0.065767446  | 1.740077705  | 0.082286745 | 0.126862392 | no |
| ARL5B        | -0.065726396 | -1.738986895 | 0.082478583 | 0.127148455 | no |
| IL1RL1       | 0.065712703  | 1.738623015  | 0.082542658 | 0.127237531 | no |
| ZNF570       | 0.065697263  | 1.738212744  | 0.08261495  | 0.127339259 | no |
| SLC22A3      | -0.065689172 | -1.73799775  | 0.082652854 | 0.127387971 | no |
| PTER         | -0.065681275 | -1.737787909 | 0.082689863 | 0.127427958 | no |
| C17orf88     | 0.065680946  | 1.737779174  | 0.082691404 | 0.127427958 | no |
| RPL28        | 0.065677645  | 1.737691447  | 0.082706881 | 0.127434802 | no |
| AQP12A       | -0.06567731  | -1.737682544 | 0.082708452 | 0.127434802 | no |
| NUDT13       | -0.065644507 | -1.736810902 | 0.082862353 | 0.1276622   | no |
| CDKL3        | -0.065625589 | -1.736308203 | 0.082951218 | 0.127789372 | no |
| SGCZ         | -0.065620143 | -1.736163487 | 0.082976815 | 0.127819066 | no |
| C2orf78      | -0.065611482 | -1.735933351 | 0.083017533 | 0.127872046 | no |
| LRP6         | -0.065588    | -1.735309371 | 0.083128016 | 0.12803247  | no |
| RASGRF2      | -0.065572716 | -1.73490325  | 0.083199989 | 0.128133561 | no |
| C2orf74      | -0.065559544 | -1.734553253 | 0.083262057 | 0.128219381 | no |
| LOC729082    | -0.06555726  | -1.734492544 | 0.083272826 | 0.1282262   | no |
| STK19        | -0.065550921 | -1.734324123 | 0.08330271  | 0.128262447 | no |
| SOST         | 0.065549303  | 1.734281131  | 0.08331034  | 0.128264427 | no |
| C5orf33      | -0.065541948 | -1.734085691 | 0.083345031 | 0.128308066 | no |
| HEXIM1       | 0.065540596  | 1.734049771  | 0.083351408 | 0.128308114 | no |
| CHST3        | -0.065526053 | -1.73366333  | 0.083420042 | 0.12840399  | no |
| LDB2         | -0.065522565 | -1.733570647 | 0.083436509 | 0.128419561 | no |
| RAB17        | 0.065510283  | 1.733244297  | 0.083494515 | 0.128499057 | no |
| CYMP         | -0.06550861  | -1.73319985  | 0.083502418 | 0.128501438 | no |
| PLEKHH1      | -0.065461286 | -1.73194236  | 0.08372625  | 0.128836085 | no |
| TMEM126A     | 0.065441316  | 1.731411743  | 0.083820845 | 0.12897183  | no |
| FLJ10213     | 0.065428754  | 1.731077949  | 0.083880397 | 0.129053638 | no |
| PSMA6        | 0.065366599  | 1.729426441  | 0.084175543 | 0.129497879 | no |
| RASSF10      | 0.065354676  | 1.729109623  | 0.084232258 | 0.129575272 | no |
| SLC25A34     | -0.06534516  | -1.728856771 | 0.084277545 | 0.129635074 | no |
| SAC3D1       | -0.065330463 | -1.728466271 | 0.084347525 | 0.129732845 | no |
| PSMB7        | -0.0653235   | -1.728281262 | 0.084380695 | 0.129773992 | no |
| FBXL14       | -0.065315524 | -1.728069315 | 0.084418709 | 0.129821363 | no |
| PSORS1C3     | 0.065314342  | 1.728037931  | 0.084424339 | 0.129821363 | no |
| FBX016       | 0.06529864   | 1.72762071   | 0.084499214 | 0.129926618 | no |
| C17orf74     | -0.06529623  | -1.727556688 | 0.084510708 | 0.12993441  | no |
| DMRTA1       | 0.065289276  | 1.72737191   | 0.08454389  | 0.129969985 | no |
| ZMYM4        | 0.065288687  | 1.727356246  | 0.084546703 | 0.129969985 | no |
| LOC100272146 | -0.065281178 | -1.727156732 | 0.084582543 | 0.130015195 | no |
| KCNK5        | 0.065277931  | 1.727070476  | 0.084598042 | 0.130029133 | no |
| SPRR1A       | -0.065265664 | -1.72674453  | 0.084656629 | 0.130109292 | no |
| KLKP1        | 0.065248138  | 1.726278852  | 0.08474039  | 0.130228125 | no |
| DHFRL1       | -0.065236748 | -1.725976214 | 0.084794862 | 0.130300003 | no |

|              |              |              |             |             |    |
|--------------|--------------|--------------|-------------|-------------|----|
| TRIM16       | -0.065235663 | -1.725947388 | 0.084800051 | 0.130300003 | no |
| STK36        | 0.065219228  | 1.725510718  | 0.084878701 | 0.130410941 | no |
| INSM1        | -0.065191377 | -1.724770719 | 0.085012118 | 0.130606003 | no |
| CALCB        | 0.065178787  | 1.724436189  | 0.085072487 | 0.130688819 | no |
| RPL13AP6     | -0.065173852 | -1.724305075 | 0.085096158 | 0.13071525  | no |
| PMF1         | -0.065118226 | -1.72282709  | 0.085363352 | 0.131114861 | no |
| NCRNA00203   | -0.065116994 | -1.722794359 | 0.085369276 | 0.131114861 | no |
| PRSS55       | -0.065115414 | -1.722752393 | 0.085376874 | 0.131116569 | no |
| LOC100130932 | 0.065104845  | 1.722471581  | 0.085427723 | 0.131184695 | no |
| ACY1         | 0.065101786  | 1.722390291  | 0.085442447 | 0.131191705 | no |
| RNF219       | -0.0651012   | -1.722374734 | 0.085445265 | 0.131191705 | no |
| TFAP2A       | -0.065096263 | -1.722243566 | 0.08546903  | 0.131218228 | no |
| GPD2         | 0.065092096  | 1.72213285   | 0.085489092 | 0.131239064 | no |
| PDCD2        | 0.065087408  | 1.72200827   | 0.085511672 | 0.131263761 | no |
| LOC100133957 | -0.065080525 | -1.721825399 | 0.085544826 | 0.131304684 | no |
| VPS24        | 0.065073779  | 1.721646157  | 0.085577332 | 0.131344606 | no |
| GTF2A2       | 0.065069666  | 1.7215369    | 0.085597151 | 0.131365052 | no |
| KLHL29       | 0.065022555  | 1.7202852    | 0.085824471 | 0.13170392  | no |
| EIF2B4       | -0.064994109 | -1.719529411 | 0.085961965 | 0.131904903 | no |
| KPTN         | -0.064970935 | -1.718913698 | 0.086074109 | 0.13206696  | no |
| SNORD89      | 0.06495094   | 1.718382454  | 0.086170962 | 0.132205533 | no |
| NTS          | 0.064909547  | 1.717282701  | 0.086371744 | 0.132503522 | no |
| PRELID1      | 0.06489553   | 1.716910301  | 0.086439819 | 0.13259474  | no |
| KILLIN       | 0.064894429  | 1.716881053  | 0.086445167 | 0.13259474  | no |
| PDZRN3       | -0.064893254 | -1.71684982  | 0.086450879 | 0.13259474  | no |
| OR5C1        | -0.064883118 | -1.716580529 | 0.086500137 | 0.132660227 | no |
| TACC1        | 0.064859569  | 1.715954874  | 0.08661467  | 0.132825803 | no |
| RGS20        | -0.064853846 | -1.71580283  | 0.086642521 | 0.132858437 | no |
| RIPPLY1      | -0.064841562 | -1.715476461 | 0.08670233  | 0.132940067 | no |
| CHAC1        | 0.064833054  | 1.71525041   | 0.086743775 | 0.132993528 | no |
| RPRML        | -0.0648229   | -1.714980652 | 0.086793255 | 0.133059298 | no |
| MYBPH        | 0.064818219  | 1.714856268  | 0.086816077 | 0.133084195 | no |
| CARTPT       | -0.064811475 | -1.714677111 | 0.086848958 | 0.133124506 | no |
| WIF1         | -0.064805962 | -1.71453062  | 0.086875851 | 0.133155633 | no |
| NEK7         | 0.064791553  | 1.714147828  | 0.086946156 | 0.133253289 | no |
| DSCR6        | 0.064785666  | 1.713991402  | 0.086974899 | 0.133287237 | no |
| ZNF281       | -0.064780621 | -1.713857385 | 0.086999531 | 0.133314879 | no |
| DPPA5        | -0.064775839 | -1.713730325 | 0.087022889 | 0.133340566 | no |
| NTF4         | 0.06477417   | 1.713685981  | 0.087031042 | 0.133342954 | no |
| PAX1         | -0.064769096 | -1.713551182 | 0.087055831 | 0.133362319 | no |
| LARP1        | -0.064768882 | -1.713545506 | 0.087056875 | 0.133362319 | no |
| SRP54        | 0.064755749  | 1.713196573  | 0.087121067 | 0.133450545 | no |
| C9orf71      | 0.064742356  | 1.712840759  | 0.087186566 | 0.133540756 | no |
| LOC100128292 | -0.064727968 | -1.712458499 | 0.087256976 | 0.133638478 | no |
| GJD4         | -0.064716863 | -1.712163472 | 0.08731135  | 0.133711625 | no |
| CCDC21       | 0.064711705  | 1.712026441  | 0.087336615 | 0.133740186 | no |
| SPAG8        | 0.064697631  | 1.71165254   | 0.087405581 | 0.133835659 | no |
| BRD7P3       | -0.064689612 | -1.711439485 | 0.087444899 | 0.133885722 | no |
| PPAP2B       | -0.064666151 | -1.710816185 | 0.087560007 | 0.134051811 | no |
| ACER3        | 0.064663135  | 1.710736075  | 0.08757481  | 0.134064322 | no |
| FASTKD5      | 0.064658103  | 1.71060238   | 0.087599519 | 0.134091996 | no |

|           |              |              |             |             |    |
|-----------|--------------|--------------|-------------|-------------|----|
| C11orf53  | -0.064653983 | -1.710492931 | 0.087619752 | 0.134112812 | no |
| ACTL8     | -0.064642592 | -1.710190291 | 0.087675717 | 0.134188315 | no |
| SMC1A     | -0.064633563 | -1.709950412 | 0.087720096 | 0.13423739  | no |
| ATP9B     | -0.064633367 | -1.709945202 | 0.08772106  | 0.13423739  | no |
| UCHL5     | -0.064614518 | -1.709444443 | 0.087813764 | 0.134369082 | no |
| COX17     | 0.064605906  | 1.709215658  | 0.087856145 | 0.134423758 | no |
| ARL17B    | -0.064601535 | -1.709099534 | 0.087877662 | 0.134446506 | no |
| PRAMEF13  | 0.06458407   | 1.708635552  | 0.087963679 | 0.134567922 | no |
| VPREB1    | 0.064576321  | 1.708429666  | 0.088001869 | 0.134616161 | no |
| NEK1      | -0.064553595 | -1.707825931 | 0.088113936 | 0.134777391 | no |
| FAM45B    | -0.064531481 | -1.707238439 | 0.088223098 | 0.134934155 | no |
| CCDC43    | -0.064520318 | -1.706941864 | 0.088278246 | 0.135008289 | no |
| ABHD13    | 0.064512813  | 1.706742478  | 0.088315338 | 0.135054799 | no |
| HBZ       | -0.06450637  | -1.70657133  | 0.088347186 | 0.135093284 | no |
| ZNF622    | -0.064501737 | -1.706448228 | 0.088370099 | 0.135118102 | no |
| C16orf55  | 0.064486575  | 1.706045434  | 0.088445107 | 0.135222562 | no |
| VEGFA     | 0.064479913  | 1.70586845   | 0.08847808  | 0.135262747 | no |
| ANKRD29   | 0.064478417  | 1.705828707  | 0.088485486 | 0.135263841 | no |
| ORC1L     | 0.064471958  | 1.705657117  | 0.088517467 | 0.135302498 | no |
| MRPS30    | 0.064443258  | 1.704894677  | 0.088659681 | 0.135509633 | no |
| C4orf37   | 0.064438674  | 1.704772901  | 0.088682412 | 0.135525066 | no |
| PAF1      | -0.064438519 | -1.704768765 | 0.088683184 | 0.135525066 | no |
| ROB04     | 0.064436039  | 1.704702891  | 0.088695482 | 0.135533615 | no |
| POLI      | -0.06441548  | -1.704156715 | 0.088797505 | 0.135679259 | no |
| PPP2CB    | -0.064404577 | -1.703867074 | 0.088851646 | 0.135751725 | no |
| TM4SF5    | 0.064398264  | 1.703699367  | 0.088883007 | 0.135789379 | no |
| METTL13   | 0.06439481   | 1.703607604  | 0.088900171 | 0.135805338 | no |
| SCRN3     | -0.064391148 | -1.703510312 | 0.088918371 | 0.135822879 | no |
| NBAS      | -0.064387726 | -1.703419415 | 0.088935378 | 0.135838594 | no |
| ATF7IP    | -0.064348861 | -1.702386927 | 0.089128741 | 0.13612365  | no |
| C19orf45  | -0.064339041 | -1.702126071 | 0.089177647 | 0.136188056 | no |
| TBP       | -0.06432252  | -1.701687173 | 0.089259983 | 0.136303499 | no |
| PGAP2     | 0.064315932  | 1.701512155  | 0.089292832 | 0.136343364 | no |
| NRN1L     | -0.064259995 | -1.70002617  | 0.089572135 | 0.13675951  | no |
| SCARNA9L  | -0.064254337 | -1.699875875 | 0.089600424 | 0.136792371 | no |
| SLC9A3R2  | -0.064235856 | -1.699384913 | 0.089692882 | 0.136923188 | no |
| KIT       | -0.064234214 | -1.699341296 | 0.0897011   | 0.136925394 | no |
| SETD7     | 0.064231636  | 1.699272815  | 0.089714004 | 0.136934752 | no |
| LOC728855 | 0.064205742  | 1.698584945  | 0.089843699 | 0.13712236  | no |
| CYP3A5    | 0.064194282  | 1.698280525  | 0.089901144 | 0.137199677 | no |
| LEAP2     | -0.0641856   | -1.698049886 | 0.089944686 | 0.137255768 | no |
| ZNF826    | -0.064180795 | -1.697922233 | 0.089968793 | 0.137282193 | no |
| FAHD2B    | 0.064173825  | 1.697737076  | 0.090003769 | 0.137325198 | no |
| CNGB1     | -0.06415513  | -1.697240446 | 0.090097635 | 0.137458042 | no |
| USP6      | -0.06414003  | -1.696839343 | 0.090173503 | 0.137563411 | no |
| LOC729668 | 0.064111751  | 1.696088102  | 0.090315739 | 0.137770002 | no |
| SNORA15   | 0.06410949   | 1.696028054  | 0.090327116 | 0.137776961 | no |
| KDM4DL    | 0.064072406  | 1.69504294   | 0.090513924 | 0.138051488 | no |
| PNPLA3    | -0.064063952 | -1.694818376 | 0.090556552 | 0.138106085 | no |
| UTRN      | 0.064047164  | 1.694372409  | 0.090641256 | 0.138219919 | no |
| UBE2T     | 0.064045843  | 1.694337328  | 0.090647922 | 0.138219919 | no |

|           |              |              |             |             |    |
|-----------|--------------|--------------|-------------|-------------|----|
| MT1E      | 0.064045094  | 1.69431743   | 0.090651703 | 0.138219919 | no |
| MYSM1     | 0.064025841  | 1.693805982  | 0.090748932 | 0.138357733 | no |
| MAP2K1    | -0.06402109  | -1.693679796 | 0.090772933 | 0.138383891 | no |
| KCNMB3    | 0.064009298  | 1.693366554  | 0.090832536 | 0.138453985 | no |
| PAX3      | 0.064009284  | 1.693366178  | 0.090832608 | 0.138453985 | no |
| GOLGA6L1  | -0.063996769 | -1.693033717 | 0.090895902 | 0.138540018 | no |
| SIP1      | -0.063993598 | -1.692949492 | 0.090911942 | 0.138554022 | no |
| ADH7      | 0.063990663  | 1.692871531  | 0.090926792 | 0.138566208 | no |
| C5orf46   | 0.063987397  | 1.692784771  | 0.09094332  | 0.13858095  | no |
| SMARCA2   | -0.06398178  | -1.692635561 | 0.09097175  | 0.138613825 | no |
| FKBP1AP1  | -0.06395362  | -1.691887535 | 0.091114386 | 0.138820698 | no |
| HIBADH    | 0.063945     | 1.691658544  | 0.091158087 | 0.138876815 | no |
| LRRC16A   | 0.063936499  | 1.69143274   | 0.091201196 | 0.13892286  | no |
| EAF2      | 0.06393633   | 1.69142825   | 0.091202054 | 0.13892286  | no |
| EDAR      | -0.063899519 | -1.690450414 | 0.091388927 | 0.139197026 | no |
| SLC17A2   | 0.063884527  | 1.690052188  | 0.09146512  | 0.139302583 | no |
| KRTAP12-3 | 0.063886673  | 1.689579441  | 0.091555637 | 0.13942994  | no |
| SNHG12    | 0.063861304  | 1.689435319  | 0.091583247 | 0.139461481 | no |
| NBPF14    | 0.063847696  | 1.68907385   | 0.091652524 | 0.139556464 | no |
| C7orf11   | 0.063843906  | 1.688973156  | 0.091671829 | 0.139575348 | no |
| ANKRD50   | -0.063840364 | -1.688879089 | 0.091689868 | 0.1395923   | no |
| ME3       | -0.063837929 | -1.688814398 | 0.091702274 | 0.139600676 | no |
| MMP23B    | 0.063835953  | 1.688761905  | 0.091712343 | 0.139605492 | no |
| RPL37     | -0.063796194 | -1.687705783 | 0.091915099 | 0.139902227 | no |
| IGSF1     | -0.063795014 | -1.687674458 | 0.091921119 | 0.139902227 | no |
| HTR1B     | -0.063773017 | -1.68709016  | 0.092033455 | 0.140062656 | no |
| RAPH1     | 0.063770967  | 1.687035709  | 0.092043929 | 0.140068053 | no |
| CCL16     | 0.063758157  | 1.686695439  | 0.092109406 | 0.140157143 | no |
| IFNA7     | 0.063739122  | 1.686189813  | 0.09220677  | 0.140294737 | no |
| NDUFA4    | 0.06373595   | 1.686105552  | 0.092223003 | 0.140308878 | no |
| CAPS2     | -0.063728836 | -1.685916591 | 0.092259416 | 0.140353716 | no |
| DGAT2L6   | 0.063724373  | 1.685798036  | 0.092282268 | 0.140368665 | no |
| CABYR     | -0.063724205 | -1.68579357  | 0.092283129 | 0.140368665 | no |
| DNAL4     | -0.063718643 | -1.685645846 | 0.09231161  | 0.140401424 | no |
| KIAA0562  | 0.063704265  | 1.685263927  | 0.092385275 | 0.140502895 | no |
| ZNF155    | 0.063698716  | 1.685116548  | 0.092413714 | 0.140534873 | no |
| DUS1L     | 0.063697451  | 1.685082925  | 0.092420204 | 0.140534873 | no |
| MND1      | 0.063688828  | 1.684853878  | 0.092464419 | 0.140591533 | no |
| ADNP2     | -0.063686156 | -1.68478291  | 0.092478122 | 0.140601795 | no |
| ARMCX3    | -0.063679492 | -1.684605899 | 0.092512308 | 0.140643194 | no |
| TOMM7     | 0.063675281  | 1.684494047  | 0.092533915 | 0.140665465 | no |
| FAM175B   | -0.063658971 | -1.684060825 | 0.092617641 | 0.140782157 | no |
| CDR2L     | 0.063654348  | 1.683938017  | 0.092641387 | 0.140796971 | no |
| OR1G1     | 0.063653874  | 1.683925428  | 0.092643821 | 0.140796971 | no |
| OGFRL1    | 0.063653006  | 1.683902377  | 0.092648279 | 0.140796971 | no |
| LOC145474 | 0.063604281  | 1.682608152  | 0.092898836 | 0.14116713  | no |
| NDUFB4    | 0.063582026  | 1.682017012  | 0.093013459 | 0.141330687 | no |
| CUL5      | -0.063577835 | -1.681905706 | 0.093035055 | 0.141352877 | no |
| DISC2     | 0.063563907  | 1.681535759  | 0.09310686  | 0.141451344 | no |
| RNF180    | -0.063560121 | -1.681435191 | 0.093126387 | 0.141470182 | no |
| CDKN2A    | 0.06355879   | 1.681399833  | 0.093133253 | 0.141470182 | no |

|           |              |              |             |             |    |
|-----------|--------------|--------------|-------------|-------------|----|
| SCARNA8   | 0.063555871  | 1.681322299  | 0.093148311 | 0.141482425 | no |
| CDK16     | -0.063550606 | -1.681182442 | 0.093175478 | 0.141513057 | no |
| CDK1      | 0.06353937   | 1.680884024  | 0.093233467 | 0.141590493 | no |
| DRD5      | -0.063529791 | -1.680629567 | 0.093282935 | 0.141654979 | no |
| ZNF438    | -0.063518802 | -1.680337685 | 0.093339706 | 0.141725821 | no |
| PON3      | -0.063518047 | -1.680317636 | 0.093343607 | 0.141725821 | no |
| XAGE3     | -0.063514673 | -1.680228036 | 0.09336104  | 0.141741646 | no |
| CDCP2     | -0.063490567 | -1.679587739 | 0.093485697 | 0.141920245 | no |
| FAM54B    | 0.0634757    | 1.679192857  | 0.093562642 | 0.14202639  | no |
| GPAA1     | 0.06346221   | 1.678834538  | 0.093632506 | 0.142121772 | no |
| APBA3     | 0.063440656  | 1.678262054  | 0.093744215 | 0.142280649 | no |
| FAM46D    | -0.063438124 | -1.678194794 | 0.093757346 | 0.142289898 | no |
| CILP2     | 0.063426019  | 1.677873264  | 0.09382014  | 0.14237451  | no |
| LOC148709 | -0.063419884 | -1.677710338 | 0.093851972 | 0.142412127 | no |
| PUS1      | 0.063413872  | 1.677550643  | 0.093883182 | 0.142448793 | no |
| C5orf40   | -0.063412427 | -1.677512267 | 0.093890682 | 0.142449484 | no |
| PARP16    | 0.063406418  | 1.677352671  | 0.093921883 | 0.142486128 | no |
| ABCC13    | 0.063391365  | 1.676952828  | 0.094000086 | 0.142594069 | no |
| FNIP1     | -0.063361702 | -1.676164975 | 0.094154333 | 0.142817338 | no |
| C2orf15   | 0.063357502  | 1.676053428  | 0.094176188 | 0.142839772 | no |
| EBNA1BP2  | 0.063327643  | 1.675260357  | 0.09433169  | 0.143064895 | no |
| KIAA0100  | 0.063321808  | 1.675105371  | 0.094362103 | 0.143100285 | no |
| SREBF1    | -0.063303617 | -1.674622224 | 0.094456962 | 0.143233396 | no |
| FGF6      | -0.063298472 | -1.674485566 | 0.094483807 | 0.143263358 | no |
| RIT2      | -0.063294108 | -1.674369642 | 0.094506584 | 0.143287147 | no |
| C7orf16   | 0.063276144  | 1.673892532  | 0.094600372 | 0.143409311 | no |
| C4orf26   | 0.063275958  | 1.673887589  | 0.094601344 | 0.143409311 | no |
| ZNF660    | -0.063259207 | -1.673442675 | 0.094688872 | 0.143531235 | no |
| PTGER2    | 0.063250569  | 1.673213242  | 0.094734034 | 0.143588927 | no |
| MTHFD1    | -0.063241208 | -1.672964626 | 0.094782991 | 0.143652362 | no |
| MYOZ3     | 0.063238535  | 1.672893617  | 0.094796978 | 0.143662791 | no |
| RGL3      | -0.063220368 | -1.672411115 | 0.094892061 | 0.143796109 | no |
| DYM       | 0.063169334  | 1.671055678  | 0.095159576 | 0.144190684 | no |
| AGFG1     | 0.063166216  | 1.670972855  | 0.095175941 | 0.144204675 | no |
| RBM27     | -0.063158975 | -1.670780535 | 0.095213953 | 0.144251457 | no |
| ASPH      | 0.063150132  | 1.670545674  | 0.095260389 | 0.144300992 | no |
| ANKRD31   | -0.063150031 | -1.670542975 | 0.095260923 | 0.144300992 | no |
| GJB3      | 0.063146189  | 1.670440935  | 0.095281103 | 0.144320748 | no |
| ZNHIT1    | 0.063135797  | 1.670164935  | 0.095335706 | 0.144392636 | no |
| NUPR1     | 0.063097969  | 1.669160257  | 0.095534679 | 0.144683157 | no |
| C1orf86   | 0.063093062  | 1.669029934  | 0.095560514 | 0.144711442 | no |
| STS       | 0.06308987   | 1.668945158  | 0.095577322 | 0.144726056 | no |
| SLC35E4   | 0.063069859  | 1.668413683  | 0.095682752 | 0.14487485  | no |
| C2orf3    | 0.063065938  | 1.668309539  | 0.095703422 | 0.144895296 | no |
| KCNG3     | -0.063059403 | -1.668135985 | 0.095737876 | 0.144936606 | no |
| LOC643486 | -0.063045537 | -1.667767708 | 0.09581102  | 0.145036478 | no |
| FAM174B   | -0.063020588 | -1.667105082 | 0.095942738 | 0.145224996 | no |
| GTPBP3    | -0.062978134 | -1.665977558 | 0.096167203 | 0.145533874 | no |
| PCDHA2    | -0.062977168 | -1.665951919 | 0.096172312 | 0.145533874 | no |
| MCM9      | 0.062976932  | 1.665945656  | 0.09617356  | 0.145533874 | no |
| ZNF497    | -0.062976549 | -1.665935468 | 0.09617559  | 0.145533874 | no |

|              |              |              |             |             |    |
|--------------|--------------|--------------|-------------|-------------|----|
| NKAPL        | 0.062965601  | 1.665644717  | 0.096233545 | 0.145610673 | no |
| CLEC1B       | 0.062961843  | 1.665544895  | 0.096253448 | 0.14562989  | no |
| LOC100286793 | 0.062947634  | 1.665167541  | 0.096328719 | 0.145732868 | no |
| MYOT         | -0.062925927 | -1.664591037 | 0.096443806 | 0.145896062 | no |
| C4orf7       | 0.062922855  | 1.664509441  | 0.096460104 | 0.145909799 | no |
| TMEM14B      | 0.062882974  | 1.663450262  | 0.096671862 | 0.146219174 | no |
| NKAIN2       | -0.062853616 | -1.662670579 | 0.096827979 | 0.146439222 | no |
| COL4A5       | 0.062852892  | 1.662651356  | 0.096831831 | 0.146439222 | no |
| SUPT6H       | -0.062842219 | -1.662367889 | 0.096888642 | 0.146514178 | no |
| UCK2         | 0.06283465   | 1.662166871  | 0.096928945 | 0.146564162 | no |
| C2orf81      | 0.062821001  | 1.661804401  | 0.097001653 | 0.146663133 | no |
| NDUFB10      | -0.062800006 | -1.661246817 | 0.097113584 | 0.146821389 | no |
| ZNF3         | -0.06279759  | -1.661182643 | 0.097126473 | 0.146829896 | no |
| BTF3L1       | -0.062770572 | -1.66046512  | 0.097270677 | 0.147036901 | no |
| PTPRM        | -0.062742099 | -1.659708953 | 0.097422834 | 0.147255896 | no |
| OTUD6A       | -0.062739355 | -1.659636086 | 0.097437507 | 0.147267064 | no |
| INADL        | 0.062735411  | 1.659531319  | 0.097458605 | 0.147287942 | no |
| C11orf35     | 0.062712707  | 1.658928385  | 0.097580101 | 0.147460534 | no |
| RPF2         | 0.062640017  | 1.656997944  | 0.097969914 | 0.148038545 | no |
| DNAJC5G      | -0.062625431 | -1.656610587 | 0.098048283 | 0.148145893 | no |
| ACSM2A       | -0.062621109 | -1.656495798 | 0.098071517 | 0.148169924 | no |
| NR2E1        | 0.062613475  | 1.65629308   | 0.098112558 | 0.148220854 | no |
| SLC39A11     | -0.062604286 | -1.656049036 | 0.098161984 | 0.148273411 | no |
| KCND3        | -0.06260428  | -1.656048885 | 0.098162014 | 0.148273411 | no |
| RBM15B       | -0.062591664 | -1.655713848 | 0.098229901 | 0.148357758 | no |
| VTI1A        | -0.062591176 | -1.655700875 | 0.098232531 | 0.148357758 | no |
| INE2         | -0.062589413 | -1.655654055 | 0.098242021 | 0.148361008 | no |
| RFPL4B       | -0.062579707 | -1.65539631  | 0.098294277 | 0.148428837 | no |
| CGB7         | 0.06257421   | 1.655250322  | 0.098323886 | 0.148462458 | no |
| KIRREL2      | 0.062549604  | 1.654596874  | 0.0984565   | 0.148651596 | no |
| TBC1D25      | -0.06254098  | -1.654367838 | 0.098503016 | 0.148710722 | no |
| SNORA36A     | -0.062516533 | -1.65371862  | 0.098634964 | 0.148898806 | no |
| DCTPP1       | 0.062508406  | 1.653502802  | 0.098678859 | 0.148953947 | no |
| MNX1         | -0.06249374  | -1.653113336 | 0.09875811  | 0.149062447 | no |
| PPARGC1A     | -0.06248233  | -1.652810315 | 0.098819807 | 0.149135427 | no |
| ALB          | -0.062482069 | -1.652803401 | 0.098821215 | 0.149135427 | no |
| QDPR         | -0.062480571 | -1.652763597 | 0.098829322 | 0.14913653  | no |
| NUF2         | 0.062472536  | 1.652550235  | 0.098872785 | 0.149190981 | no |
| KIF25        | -0.062459113 | -1.65219377  | 0.098945433 | 0.14928946  | no |
| SLC4A8       | -0.062433    | -1.651500306 | 0.099086885 | 0.149491728 | no |
| MAP6         | -0.062428134 | -1.651371087 | 0.099113261 | 0.149520363 | no |
| MAP7         | -0.062422793 | -1.65122925  | 0.099142219 | 0.14955289  | no |
| GLMN         | 0.06241792   | 1.651099839  | 0.099168645 | 0.149581593 | no |
| WFDC11       | 0.062410686  | 1.650907755  | 0.099207881 | 0.149629611 | no |
| LOC100271836 | -0.062396955 | -1.650543103 | 0.0992824   | 0.149730834 | no |
| SLIT2        | 0.062393107  | 1.65044093   | 0.099303288 | 0.149751165 | no |
| C1orf27      | -0.062379719 | -1.650085391 | 0.099375999 | 0.149849639 | no |
| HSPD1        | -0.062377417 | -1.650024277 | 0.099388502 | 0.149857315 | no |
| SLM02        | 0.062354822  | 1.649424249  | 0.099511324 | 0.150031316 | no |
| C1orf123     | 0.062348469  | 1.649255531  | 0.099545881 | 0.150072226 | no |
| P4HTM        | -0.062296779 | -1.64788289  | 0.099827385 | 0.150485392 | no |



|              |              |              |             |             |    |
|--------------|--------------|--------------|-------------|-------------|----|
| CDYL2        | -0.062256467 | -1.6468124   | 0.100047365 | 0.150805758 | no |
| C6orf145     | 0.062238437  | 1.646333612  | 0.100145879 | 0.150942999 | no |
| SLC10A5      | -0.062236193 | -1.646274024 | 0.100158145 | 0.150950233 | no |
| PRKRIR       | -0.062224684 | -1.645968409 | 0.100221074 | 0.151033816 | no |
| TMEM141      | 0.062211268  | 1.645612145  | 0.100294472 | 0.151132332 | no |
| SPAG16       | -0.062210002 | -1.645578545 | 0.100301396 | 0.151132332 | no |
| C6orf176     | 0.062207047  | 1.645500055  | 0.100317574 | 0.151145443 | no |
| LOC100130386 | -0.06220233  | -1.645374815 | 0.100343391 | 0.151173075 | no |
| DEPDC4       | 0.062196075  | 1.645208709  | 0.10037764  | 0.151213406 | no |
| KNCN         | 0.062170091  | 1.644518719  | 0.100520009 | 0.151416595 | no |
| FRK          | 0.062162852  | 1.644326475  | 0.100559704 | 0.151465104 | no |
| KLKB1        | 0.062158333  | 1.644206468  | 0.10058449  | 0.151491151 | no |
| ADRA1D       | 0.062152128  | 1.64404171   | 0.100618526 | 0.151531126 | no |
| RPP21        | -0.062145723 | -1.643871627 | 0.100653673 | 0.151572766 | no |
| GRIN2A       | -0.062134992 | -1.643586669 | 0.100712579 | 0.151650176 | no |
| SRGAP1       | -0.062112322 | -1.642984674 | 0.100837113 | 0.151826389 | no |
| LASS5        | 0.062110942  | 1.642948033  | 0.100844697 | 0.151826501 | no |
| GCM2         | -0.062103888 | -1.642760727 | 0.100883472 | 0.15187357  | no |
| PFDN5        | 0.062095106  | 1.642527535  | 0.100931763 | 0.151934956 | no |
| ATP6VOD1     | -0.062078668 | -1.642091031 | 0.101022207 | 0.152059781 | no |
| HOMEZ        | 0.062063327  | 1.641683672  | 0.10110667  | 0.152170815 | no |
| C21orf56     | -0.062062137 | -1.64165206  | 0.101113227 | 0.152170815 | no |
| THRSP        | 0.06206117   | 1.641626387  | 0.101118552 | 0.152170815 | no |
| GAS7         | 0.06200421   | 1.640113883  | 0.101432684 | 0.152632182 | no |
| CTAGE1       | 0.061995298  | 1.639877226  | 0.101481905 | 0.152694884 | no |
| CALM2        | 0.061991669  | 1.639780858  | 0.101501954 | 0.152713685 | no |
| PDCD5        | 0.061973368  | 1.639294899  | 0.101603103 | 0.152854493 | no |
| APOA1BP      | 0.061963465  | 1.639031948  | 0.101657868 | 0.152920057 | no |
| NFX1         | -0.061962752 | -1.63901302  | 0.101661811 | 0.152920057 | no |
| CCRL1        | 0.061949902  | 1.638671817  | 0.10173291  | 0.153015621 | no |
| CH25H        | 0.061925967  | 1.638036257  | 0.101865454 | 0.153203581 | no |
| DOK5         | 0.061837807  | 1.635695319  | 0.102354835 | 0.153928151 | no |
| MGC14436     | -0.061818381 | -1.635179513 | 0.102462918 | 0.154079232 | no |
| TIMM17B      | -0.061798635 | -1.634655188 | 0.102572879 | 0.154233115 | no |
| ZNF44        | 0.061792216  | 1.634484757  | 0.102608642 | 0.154275416 | no |
| PACSIN3      | 0.061772418  | 1.633959062  | 0.102719016 | 0.154429882 | no |
| C17orf89     | -0.061758956 | -1.633601609 | 0.102794119 | 0.154527603 | no |
| PCSK9        | -0.061758027 | -1.633576958 | 0.1027993   | 0.154527603 | no |
| FAM153C      | -0.061752045 | -1.633418106 | 0.102832692 | 0.154566305 | no |
| MECR         | -0.061748455 | -1.633322785 | 0.102852733 | 0.154584936 | no |
| KIAA1614     | 0.061714003  | 1.632408009  | 0.103045222 | 0.15486273  | no |
| TAAR6        | -0.061708861 | -1.632271482 | 0.103073975 | 0.154894427 | no |
| C9orf156     | -0.061698782 | -1.632003864 | 0.103130354 | 0.154967633 | no |
| ATOH1        | 0.06169611   | 1.631932895  | 0.10314531  | 0.154978587 | no |
| POLR2J3      | -0.061665163 | -1.631111191 | 0.103318593 | 0.155227414 | no |
| HAX1         | 0.0616523    | 1.630769657  | 0.103390685 | 0.155324184 | no |
| FIGF         | 0.06164883   | 1.630677515  | 0.103410141 | 0.15534187  | no |
| GTF2I        | -0.061635387 | -1.630320581 | 0.103485538 | 0.155443581 | no |
| FECH         | 0.061566061  | 1.628479856  | 0.103875057 | 0.156017079 | no |
| UPF1         | -0.061528378 | -1.62747932  | 0.104087272 | 0.156324206 | no |
| DPY19L4      | -0.061512455 | -1.627056533 | 0.104177049 | 0.156447417 | no |

|              |              |              |             |             |    |
|--------------|--------------|--------------|-------------|-------------|----|
| AKAP8        | -0.061441089 | -1.625161694 | 0.104580168 | 0.157041135 | no |
| GPRIN2       | -0.061408861 | -1.624306007 | 0.104762618 | 0.157303425 | no |
| PKN3         | 0.061403738  | 1.624170005  | 0.10479164  | 0.157335317 | no |
| L1TD1        | 0.061401     | 1.624097305  | 0.104807156 | 0.157346928 | no |
| RAPGEF1      | 0.061388963  | 1.6237777    | 0.104875391 | 0.157437678 | no |
| C4orf43      | 0.061363808  | 1.623109815  | 0.105018096 | 0.157633307 | no |
| WEE2         | -0.061363243 | -1.623094825 | 0.1050213   | 0.157633307 | no |
| LOC285768    | -0.061351058 | -1.622771307 | 0.105090483 | 0.157725438 | no |
| TNNI1        | 0.061310859  | 1.621704016  | 0.105318973 | 0.158045885 | no |
| IFITM5       | -0.061310745 | -1.621700968 | 0.105319626 | 0.158045885 | no |
| EPS15        | 0.061291227  | 1.621182771  | 0.105430707 | 0.158200834 | no |
| LTBP3        | 0.061284644  | 1.621007983  | 0.105468196 | 0.158245342 | no |
| DNAH2        | 0.061280546  | 1.620899184  | 0.105491536 | 0.158268617 | no |
| C16orf59     | -0.061264843 | -1.620482261 | 0.105581017 | 0.158391111 | no |
| DNMBP        | -0.061253195 | -1.620173002 | 0.105647429 | 0.158478982 | no |
| ZNF746       | -0.061245272 | -1.619962667 | 0.105692617 | 0.158535005 | no |
| CYP2C18      | -0.061237978 | -1.619768995 | 0.105734239 | 0.15858567  | no |
| IPO9         | -0.06122955  | -1.619545242 | 0.105782341 | 0.158646048 | no |
| BMP8B        | 0.061227699  | 1.619496086  | 0.105792911 | 0.158650132 | no |
| LOC100131691 | 0.061225348  | 1.619433679  | 0.105806331 | 0.158658489 | no |
| CES3         | 0.061200749  | 1.618780572  | 0.105946861 | 0.158854446 | no |
| TIMM44       | -0.061199723 | -1.618753333 | 0.105952725 | 0.158854446 | no |
| ABCA2        | -0.061186065 | -1.618390727 | 0.106030815 | 0.158949888 | no |
| NAPRT1       | -0.061184509 | -1.618349401 | 0.106039718 | 0.158949888 | no |
| GOLGA6C      | -0.061184465 | -1.618348238 | 0.106039968 | 0.158949888 | no |
| 4-Sep        | -0.061181796 | -1.618277371 | 0.106055237 | 0.158960988 | no |
| SNORA24      | 0.061157308  | 1.617627243  | 0.106195386 | 0.159159253 | no |
| COL25A1      | 0.061144973  | 1.617299737  | 0.106266043 | 0.159253344 | no |
| TUBA3C       | -0.061141309 | -1.617202458 | 0.106287038 | 0.159261549 | no |
| BTG4         | 0.061141268  | 1.617201371  | 0.106287273 | 0.159261549 | no |
| ATP1B1       | -0.061134752 | -1.617028383 | 0.106324614 | 0.159303703 | no |
| LY6G6E       | -0.061133609 | -1.616998047 | 0.106331164 | 0.159303703 | no |
| PSME3        | 0.06111771   | 1.616575939  | 0.10642233  | 0.159428473 | no |
| NPC1         | 0.061103045  | 1.616186593  | 0.106506475 | 0.159542707 | no |
| HSDL2        | -0.061097369 | -1.616035885 | 0.106539061 | 0.159579695 | no |
| BCL11B       | -0.061095115 | -1.615976043 | 0.106552001 | 0.159587256 | no |
| RPS4X        | -0.061092672 | -1.615911184 | 0.106566029 | 0.159596442 | no |
| GSTA1        | 0.06104928   | 1.614759178  | 0.10681542  | 0.159948403 | no |
| TTN          | -0.06104903  | -1.61475252  | 0.106816863 | 0.159948403 | no |
| TBC1D22B     | 0.061041698  | 1.614557861  | 0.10685905  | 0.159999724 | no |
| CRH          | -0.061035377 | -1.61439005  | 0.106895429 | 0.160042341 | no |
| FLJ39653     | -0.061033055 | -1.614328419 | 0.106908792 | 0.160050496 | no |
| PSMD13       | 0.061030707  | 1.614266079  | 0.10692231  | 0.160058882 | no |
| TMEM68       | 0.060995971  | 1.613343872  | 0.107122446 | 0.160346607 | no |
| ATF7         | 0.060986815  | 1.613100797  | 0.107175248 | 0.160413766 | no |
| LAGE3        | 0.060980076  | 1.612921877  | 0.107214126 | 0.160460079 | no |
| CCDC61       | 0.060970273  | 1.612661611  | 0.107270701 | 0.160532867 | no |
| LOC284100    | -0.060933695 | -1.611690515 | 0.107482    | 0.160837176 | no |
| CYC1         | -0.06092821  | -1.611544916 | 0.107513709 | 0.160872719 | no |
| SLC8A1       | 0.060924247  | 1.611439701  | 0.107536628 | 0.160895105 | no |
| HSD11B1      | 0.060920389  | 1.611337265  | 0.107558945 | 0.160916587 | no |

|           |              |              |             |             |    |
|-----------|--------------|--------------|-------------|-------------|----|
| MRE11A    | 0.060917198  | 1.611252549  | 0.107577405 | 0.160932295 | no |
| ATP8B5P   | -0.060914315 | -1.611176005 | 0.107594086 | 0.16094534  | no |
| OPALIN    | -0.060905582 | -1.610944159 | 0.107644623 | 0.161009025 | no |
| VGLL1     | -0.060896113 | -1.610692793 | 0.107699437 | 0.161079096 | no |
| RNASE7    | 0.060890026  | 1.610531176  | 0.107734692 | 0.161119905 | no |
| TRAF7     | 0.060879074  | 1.610240417  | 0.10779814  | 0.161202869 | no |
| LOC285375 | -0.060874239 | -1.610112081 | 0.107826154 | 0.161231761 | no |
| GSX1      | -0.060872988 | -1.610078848 | 0.107833409 | 0.161231761 | no |
| C11orf48  | -0.060867385 | -1.609930114 | 0.107865885 | 0.161258491 | no |
| SCARNA21  | 0.060867152  | 1.609923915  | 0.107867239 | 0.161258491 | no |
| STX5      | -0.060857783 | -1.609675189 | 0.107921566 | 0.16132778  | no |
| SLC45A4   | -0.060849504 | -1.609455395 | 0.107969592 | 0.161387639 | no |
| NUP88     | 0.060830796  | 1.60895874   | 0.108078175 | 0.161538001 | no |
| POLR2J    | 0.060826458  | 1.60884357   | 0.108103367 | 0.16156371  | no |
| SERPINE2  | -0.060820167 | -1.60867656  | 0.108139906 | 0.161606374 | no |
| NROB1     | -0.060816872 | -1.608589074 | 0.108159051 | 0.161623037 | no |
| OR2J3     | 0.060788817  | 1.607844277  | 0.108322144 | 0.161854787 | no |
| PPP1CC    | 0.060786883  | 1.607792932  | 0.108333395 | 0.161859635 | no |
| MAPK6     | -0.060783015 | -1.607690264 | 0.108355894 | 0.161879047 | no |
| CDCA7     | 0.060781897  | 1.607660573  | 0.108362401 | 0.161879047 | no |
| KCNK18    | -0.060770208 | -1.607350259 | 0.10843043  | 0.161968706 | no |
| RANGRF    | -0.060763753 | -1.60717889  | 0.108468014 | 0.162012877 | no |
| CMA1      | 0.060751739  | 1.606859955  | 0.108537987 | 0.162105417 | no |
| MAPRE2    | -0.060741977 | -1.606600803 | 0.108594871 | 0.162166914 | no |
| PCDHA8    | -0.06074192  | -1.606599284 | 0.108595205 | 0.162166914 | no |
| HSP90AA1  | -0.060739469 | -1.606534221 | 0.10860949  | 0.162176267 | no |
| NAT8      | -0.060715285 | -1.605892188 | 0.108750532 | 0.162374881 | no |
| NXF1      | -0.060696111 | -1.60538318  | 0.108862455 | 0.16252999  | no |
| CKMT2     | 0.060688592  | 1.60518355   | 0.108906376 | 0.162583556 | no |
| MAP4K2    | 0.060685763  | 1.605108465  | 0.108922899 | 0.162596217 | no |
| BRP44L    | -0.060674435 | -1.604807721 | 0.1089891   | 0.162683028 | no |
| DCI       | -0.060669957 | -1.604688843 | 0.109015276 | 0.162710088 | no |
| CHID1     | 0.060659951  | 1.604423219  | 0.109073784 | 0.162785396 | no |
| FUK       | -0.06061941  | -1.603346972 | 0.109311099 | 0.163127531 | no |
| PPY2      | -0.060606873 | -1.603014161 | 0.109384567 | 0.163217757 | no |
| CCDC107   | 0.060606338  | 1.602999953  | 0.109387704 | 0.163217757 | no |
| ATP1B4    | 0.060603599  | 1.602927252  | 0.109403759 | 0.163229665 | no |
| TARDBP    | -0.060595918 | -1.602723336 | 0.109448799 | 0.163284815 | no |
| POLR1A    | -0.060588596 | -1.602528956 | 0.109491747 | 0.163336835 | no |
| ZACN      | -0.060573248 | -1.602121512 | 0.109581813 | 0.163459134 | no |
| BCYRN1    | -0.060562462 | -1.601835191 | 0.10964514  | 0.163541531 | no |
| FOXD2     | 0.060539906  | 1.601236398  | 0.109777673 | 0.163727131 | no |
| PDGFRA    | -0.060533562 | -1.601067999 | 0.109814968 | 0.163770673 | no |
| GRIK1     | 0.060528269  | 1.600927487  | 0.109846094 | 0.16380501  | no |
| ZNF167    | -0.060506521 | -1.600350146 | 0.109974061 | 0.163983743 | no |
| NOL8      | 0.060501793  | 1.600224647  | 0.110001894 | 0.164013148 | no |
| USP12     | -0.06048439  | -1.599762643 | 0.110104402 | 0.164153883 | no |
| C7orf70   | 0.060477065  | 1.5995682    | 0.110147567 | 0.164206129 | no |
| OR2AG2    | -0.060475542 | -1.599527759 | 0.110156547 | 0.164207407 | no |
| COX6B1    | 0.060470742  | 1.599400358  | 0.110184838 | 0.164237471 | no |
| CYP2J2    | -0.060469324 | -1.599362708 | 0.1101932   | 0.164237827 | no |

|           |              |              |             |             |    |
|-----------|--------------|--------------|-------------|-------------|----|
| POC1B     | 0.060464573  | 1.599236591  | 0.110221214 | 0.164263413 | no |
| TIMELESS  | 0.060463657  | 1.599212272  | 0.110226616 | 0.164263413 | no |
| TUBA4B    | 0.060427278  | 1.598246551  | 0.110441321 | 0.164567484 | no |
| ACADVL    | 0.060426327  | 1.598221305  | 0.110446938 | 0.164567484 | no |
| RNF122    | 0.060414402  | 1.597904747  | 0.110517392 | 0.16464737  | no |
| BMP15     | -0.060413397 | -1.597878056 | 0.110523334 | 0.16464737  | no |
| H3F3A     | 0.060413118  | 1.59787065   | 0.110524983 | 0.16464737  | no |
| DNAL1     | -0.060400573 | -1.597537628 | 0.110599144 | 0.164739238 | no |
| ZNF536    | -0.060399929 | -1.597520545 | 0.110602949 | 0.164739238 | no |
| AAK1      | -0.060393429 | -1.597348001 | 0.110641389 | 0.164784354 | no |
| DLEU1     | 0.060389235  | 1.59723667   | 0.110666198 | 0.164809162 | no |
| C6orf123  | 0.060364314  | 1.596575125  | 0.110813705 | 0.165016681 | no |
| FAM165B   | -0.06036264  | -1.596530671 | 0.110823622 | 0.165019295 | no |
| ATP6V1D   | -0.060350934 | -1.596219943 | 0.110892965 | 0.165110388 | no |
| APOL5     | 0.060344361  | 1.596045458  | 0.110931918 | 0.165156224 | no |
| TMEM90B   | 0.060341279  | 1.595963644  | 0.110950187 | 0.16517126  | no |
| LCORL     | -0.060335522 | -1.595810819 | 0.110984318 | 0.165209906 | no |
| LOC253724 | 0.060314675  | 1.595257427  | 0.111107979 | 0.16538181  | no |
| NDST2     | 0.060289474  | 1.594588455  | 0.111257614 | 0.165592347 | no |
| RAD17     | -0.060276039 | -1.594231801 | 0.111337455 | 0.165698982 | no |
| KIR3DP1   | 0.060268057  | 1.594019925  | 0.111384907 | 0.165757402 | no |
| CETN3     | 0.060264962  | 1.593937762  | 0.111403313 | 0.16577259  | no |
| XPNPEP1   | -0.060244429 | -1.593392706 | 0.111525474 | 0.165931866 | no |
| NDUFA6    | 0.060244212  | 1.593386952  | 0.111526765 | 0.165931866 | no |
| NOTCH2    | 0.060239449  | 1.593260524  | 0.111555116 | 0.165961835 | no |
| ZNF446    | -0.060236184 | -1.593173839 | 0.111574558 | 0.165978546 | no |
| ZNF688    | -0.060217148 | -1.592668538 | 0.111687944 | 0.166134994 | no |
| CNOT4     | 0.060208894  | 1.592449447  | 0.111737134 | 0.166195937 | no |
| GABRA2    | -0.060196973 | -1.592132988 | 0.111808216 | 0.166278776 | no |
| C21orf81  | -0.060196795 | -1.592128265 | 0.111809277 | 0.166278776 | no |
| MUSTN1    | -0.060186964 | -1.591867313 | 0.111867919 | 0.166350974 | no |
| MAP1LC3B  | -0.060185898 | -1.591839011 | 0.11187428  | 0.166350974 | no |
| YTHDC2    | 0.060177771  | 1.591623277  | 0.111922781 | 0.166410853 | no |
| FAM197Y2  | 0.060163683  | 1.591249312  | 0.112006893 | 0.166521397 | no |
| ALG13     | 0.06016256   | 1.591219496  | 0.112013602 | 0.166521397 | no |
| GPR88     | 0.060155151  | 1.591022834  | 0.112057857 | 0.16657494  | no |
| ING1      | -0.060148874 | -1.590856222 | 0.112095362 | 0.16661844  | no |
| BRIP1     | 0.060146078  | 1.590782004  | 0.112112071 | 0.16662236  | no |
| PCDHB8    | -0.060145675 | -1.590771299 | 0.112114482 | 0.16662236  | no |
| PTPLB     | 0.060143492  | 1.590713341  | 0.112127532 | 0.166629507 | no |
| ZNF677    | -0.060134993 | -1.590487738 | 0.112178342 | 0.166682142 | no |
| AGAP1     | -0.060134809 | -1.590482868 | 0.112179439 | 0.166682142 | no |
| TTY20     | 0.060126136  | 1.590252653  | 0.112231308 | 0.166746956 | no |
| EAF1      | 0.060118088  | 1.590039013  | 0.112279458 | 0.166806238 | no |
| SCAND3    | 0.060104685  | 1.589683228  | 0.112359683 | 0.166913157 | no |
| POC1A     | 0.060100206  | 1.589564349  | 0.112386498 | 0.166940726 | no |
| GRK6      | 0.060095126  | 1.589429488  | 0.112416924 | 0.166973654 | no |
| C9orf173  | -0.060078567 | -1.588989962 | 0.112516133 | 0.167108733 | no |
| OR52W1    | -0.060065873 | -1.588653009 | 0.112592237 | 0.167209478 | no |
| PRPF4B    | -0.060058102 | -1.58844672  | 0.112638848 | 0.167266415 | no |
| CHMP4A    | 0.060042318  | 1.588027737  | 0.112733566 | 0.167394774 | no |

|           |              |              |             |             |    |
|-----------|--------------|--------------|-------------|-------------|----|
| PCDHA9    | -0.060025304 | -1.587576134 | 0.112835729 | 0.167534168 | no |
| MAD2L1    | 0.060023     | 1.587514958  | 0.112849574 | 0.167535099 | no |
| PVRIG     | 0.060022441  | 1.587500133  | 0.112852929 | 0.167535099 | no |
| INGX      | 0.060005127  | 1.587040549  | 0.112956985 | 0.167677262 | no |
| SPG11     | 0.059985462  | 1.586518571  | 0.113075259 | 0.16784051  | no |
| C11orf84  | -0.059977976 | -1.586319858 | 0.113120311 | 0.167895055 | no |
| PRSS54    | -0.059963345 | -1.585931487 | 0.113208402 | 0.168013468 | no |
| TH1L      | -0.059950836 | -1.585599466 | 0.113283755 | 0.16811296  | no |
| LSM4      | 0.05994042   | 1.585322985  | 0.113346534 | 0.168193777 | no |
| DEFB124   | -0.05993343  | -1.585137434 | 0.113388681 | 0.168243971 | no |
| ALX1      | 0.05988753   | 1.583919083  | 0.11366573  | 0.168642675 | no |
| TRAPPC6A  | -0.059884735 | -1.583844891 | 0.113682618 | 0.168655355 | no |
| FOXDI     | 0.059879601  | 1.583708626  | 0.113713641 | 0.168687054 | no |
| SEC16A    | -0.059878438 | -1.58367775  | 0.113720672 | 0.168687054 | no |
| ZNF284    | 0.059872473  | 1.583519431  | 0.113756726 | 0.168717358 | no |
| SFXN3     | 0.059871722  | 1.583499484  | 0.113761269 | 0.168717358 | no |
| TOR1AIP2  | 0.059870917  | 1.583478118  | 0.113766136 | 0.168717358 | no |
| SNORA14A  | 0.059858549  | 1.583149837  | 0.113840929 | 0.168815895 | no |
| LOC145783 | 0.05984725   | 1.58284993   | 0.113909292 | 0.168904882 | no |
| RPL14     | -0.059831959 | -1.582444037 | 0.114001866 | 0.169029754 | no |
| ADIPOQ    | 0.059825781  | 1.582280077  | 0.114039278 | 0.169072825 | no |
| SGK1      | 0.059811237  | 1.581894023  | 0.114127405 | 0.169191074 | no |
| NLRP5     | 0.059786284  | 1.581231706  | 0.114278721 | 0.169402975 | no |
| TCL6      | 0.059781952  | 1.581116703  | 0.114305011 | 0.169429525 | no |
| ERCC4     | 0.059773211  | 1.580884713  | 0.11435806  | 0.169494254 | no |
| ZNF641    | 0.059771995  | 1.580852414  | 0.114365447 | 0.169494254 | no |
| CLPP      | 0.059765946  | 1.580691869  | 0.114402172 | 0.169536254 | no |
| LBR       | 0.059753407  | 1.580359034  | 0.114478337 | 0.169636692 | no |
| UNC93A    | -0.059711845 | -1.579255881 | 0.114731068 | 0.169998734 | no |
| OR2B6     | 0.05970651   | 1.579114267  | 0.114763543 | 0.170034392 | no |
| HIST2H2BA | 0.059668039  | 1.578093173  | 0.114997918 | 0.170369159 | no |
| DENND4C   | -0.059647216 | -1.577540467 | 0.11512494  | 0.170544845 | no |
| SDHAF2    | 0.059636593  | 1.577258504  | 0.115189783 | 0.1706284   | no |
| TIE1      | -0.059633732 | -1.577182574 | 0.115207249 | 0.17064177  | no |
| GEFT      | -0.059612754 | -1.576625784 | 0.115335394 | 0.17081906  | no |
| C7orf64   | 0.059586349  | 1.57592494   | 0.115496851 | 0.171045659 | no |
| ASXL1     | -0.059550409 | -1.574971018 | 0.115716898 | 0.171358987 | no |
| BEND3     | -0.059529366 | -1.574412505 | 0.115845887 | 0.171537435 | no |
| NANOG     | -0.059525474 | -1.574309188 | 0.11586976  | 0.171560221 | no |
| ENTPD3    | -0.059512172 | -1.573956132 | 0.115951371 | 0.171661112 | no |
| SPIN4     | 0.0595116    | 1.573940944  | 0.115954882 | 0.171661112 | no |
| C10orf26  | 0.059505091  | 1.573768183  | 0.115994834 | 0.171704143 | no |
| OR2T10    | -0.059504097 | -1.573741809 | 0.116000934 | 0.171704143 | no |
| OR2W3     | -0.059501763 | -1.57367987  | 0.116015261 | 0.171712778 | no |
| GPHB5     | 0.059482783  | 1.573176107  | 0.116131836 | 0.171872737 | no |
| DPPA4     | 0.059471219  | 1.572869168  | 0.11620291  | 0.171965337 | no |
| CCT6P1    | -0.059465822 | -1.572725944 | 0.116236086 | 0.172001844 | no |
| MFSD9     | 0.059464375  | 1.572687538  | 0.116244984 | 0.172002421 | no |
| EXTL3     | 0.059460335  | 1.572580305  | 0.116269829 | 0.172016398 | no |
| KIF6      | -0.059459802 | -1.572566158 | 0.116273108 | 0.172016398 | no |
| CYHR1     | -0.059458689 | -1.572536611 | 0.116279954 | 0.172016398 | no |

|           |              |              |             |             |    |
|-----------|--------------|--------------|-------------|-------------|----|
| C8orf59   | 0.059450392  | 1.572316407  | 0.116330992 | 0.172079309 | no |
| C5        | 0.059443476  | 1.572132834  | 0.116373553 | 0.172129672 | no |
| KIAA1712  | -0.0594405   | -1.572053861 | 0.116391866 | 0.172144166 | no |
| CD164L2   | 0.059433797  | 1.571875939  | 0.116433133 | 0.172192604 | no |
| KRTAP27-1 | 0.059429057  | 1.571750149  | 0.116462316 | 0.172223165 | no |
| ZNF227    | -0.059427079 | -1.571697636 | 0.116474501 | 0.172228586 | no |
| TRIM28    | -0.059404519 | -1.571098872 | 0.116613503 | 0.172421515 | no |
| OR1J1     | 0.059402148  | 1.57103595   | 0.116628117 | 0.172430513 | no |
| FAM162A   | 0.059399823  | 1.570974227  | 0.116642455 | 0.172439101 | no |
| UBIAD1    | -0.059397296 | -1.570907176 | 0.116658032 | 0.172439774 | no |
| MICALL1   | 0.059396982  | 1.570898843  | 0.116659968 | 0.172439774 | no |
| AUTS2     | -0.059394471 | -1.570832187 | 0.116675455 | 0.172450058 | no |
| HBS1L     | -0.059376091 | -1.570344358 | 0.116788847 | 0.172605037 | no |
| ZYG11A    | 0.059350935  | 1.569676701  | 0.116944179 | 0.172821973 | no |
| ARHGAP36  | -0.059349299 | -1.569633275 | 0.116954288 | 0.17282428  | no |
| LRRK2     | 0.059344896  | 1.569516419  | 0.116981493 | 0.172851848 | no |
| KIF27     | 0.059330356  | 1.569130508  | 0.117071374 | 0.172972013 | no |
| CTDSP2    | 0.059310867  | 1.568613264  | 0.117191926 | 0.173137477 | no |
| C6orf70   | -0.059301239 | -1.568357747 | 0.117251515 | 0.173212855 | no |
| KIAA1324L | -0.059292823 | -1.568134357 | 0.117303632 | 0.173277184 | no |
| SNORA67   | 0.059278838  | 1.567763194  | 0.117390263 | 0.173392485 | no |
| ZNF71     | 0.05927661   | 1.567704069  | 0.117404068 | 0.173400208 | no |
| FAIM      | 0.059254508  | 1.567117469  | 0.117541098 | 0.173589914 | no |
| PSCA      | -0.05924947  | -1.566983757 | 0.117572351 | 0.173623388 | no |
| RAD54L    | 0.059241312  | 1.566767237  | 0.117622973 | 0.173685457 | no |
| TMEM146   | 0.059213725  | 1.566035067  | 0.11779428  | 0.173916638 | no |
| FH        | 0.059213329  | 1.566024569  | 0.117796737 | 0.173916638 | no |
| LRRC14B   | -0.059189366 | -1.565388583 | 0.117945701 | 0.174123854 | no |
| SLC7A9    | 0.059178502  | 1.565100262  | 0.118013282 | 0.174205583 | no |
| ZNF585A   | 0.059177697  | 1.565078883  | 0.118018294 | 0.174205583 | no |
| MFGE8     | 0.059169181  | 1.564852867  | 0.118071294 | 0.174271092 | no |
| ZDHHC16   | -0.059160035 | -1.564610127 | 0.118128236 | 0.174342411 | no |
| DLG1      | -0.059150674 | -1.564361699 | 0.118186535 | 0.174415721 | no |
| ZBTB46    | 0.059135124  | 1.56394901   | 0.118283432 | 0.174545977 | no |
| KLK15     | -0.059132497 | -1.563879272 | 0.118299812 | 0.174557408 | no |
| C4orf41   | 0.059129349  | 1.563795745  | 0.118319433 | 0.174573619 | no |
| TSEN15    | 0.05911877   | 1.563514969  | 0.118385409 | 0.174658217 | no |
| FGFR4     | -0.059114761 | -1.563408569 | 0.118410418 | 0.174682366 | no |
| DCST1     | -0.059106773 | -1.563196581 | 0.118460258 | 0.174743141 | no |
| SNORA78   | 0.059085539  | 1.562633028  | 0.118592832 | 0.174925073 | no |
| FAM173B   | 0.059084248  | 1.562598768  | 0.118600896 | 0.174925073 | no |
| EIF2B2    | -0.059072954 | -1.562299024 | 0.118671461 | 0.175016383 | no |
| C1orf216  | -0.059070626 | -1.562237244 | 0.118686009 | 0.17502201  | no |
| SAMD4A    | 0.059069573  | 1.562209301  | 0.11869259  | 0.17502201  | no |
| ZNF567    | 0.05904958   | 1.561678697  | 0.118817602 | 0.175192243 | no |
| FAM170B   | 0.059048339  | 1.561645766  | 0.118825365 | 0.175192243 | no |
| SNORA77   | 0.059032444  | 1.561223929  | 0.11892483  | 0.175315872 | no |
| FAM107B   | -0.059032168 | -1.561216597 | 0.118926559 | 0.175315872 | no |
| CCDC63    | 0.059007591  | 1.560564342  | 0.119080486 | 0.175529984 | no |
| C17orf82  | 0.059002398  | 1.560426523  | 0.11911303  | 0.175565156 | no |
| LOC646471 | -0.058984634 | -1.559955072 | 0.11922441  | 0.175715112 | no |

|           |              |              |             |             |    |
|-----------|--------------|--------------|-------------|-------------|----|
| C3orf62   | -0.0589834   | -1.559922318 | 0.119232151 | 0.175715112 | no |
| CNTLN     | 0.058968667  | 1.559531318  | 0.119324591 | 0.175833455 | no |
| TAS2R1    | 0.058967829  | 1.559509095  | 0.119329847 | 0.175833455 | no |
| DCPS      | 0.058951705  | 1.559081158  | 0.119431087 | 0.175969809 | no |
| C10orf72  | 0.058939439  | 1.558755643  | 0.119508142 | 0.17607051  | no |
| BTBD8     | -0.058928313 | -1.558460368 | 0.119578072 | 0.176160702 | no |
| C10orf46  | 0.058917065  | 1.558161859  | 0.119648801 | 0.176252056 | no |
| RPS18     | -0.058909036 | -1.557948793 | 0.119699305 | 0.176313606 | no |
| CHCHD1    | -0.058898853 | -1.557678532 | 0.119763391 | 0.176395151 | no |
| MRPL9     | 0.058882941  | 1.557256263  | 0.119863575 | 0.176529848 | no |
| MTERFD2   | -0.058880647 | -1.557195378 | 0.119878025 | 0.17653827  | no |
| AR        | 0.058874853  | 1.557041604  | 0.119914528 | 0.176579165 | no |
| SLC16A12  | 0.058816217  | 1.555485505  | 0.120284407 | 0.177110926 | no |
| OR11H12   | -0.058787765 | -1.554730428 | 0.120464207 | 0.177362755 | no |
| STX8      | 0.058781265  | 1.55455793   | 0.120505313 | 0.177410355 | no |
| SSSCA1    | -0.058771548 | -1.554300073 | 0.120566779 | 0.177487923 | no |
| PEX11B    | 0.058763451  | 1.554085186  | 0.120618021 | 0.17755043  | no |
| TARS2     | -0.058761625 | -1.55403673  | 0.120629578 | 0.177554515 | no |
| SLC25A17  | 0.05875508   | 1.553863029  | 0.120671015 | 0.177602576 | no |
| NLRP10    | 0.058699979  | 1.552400758  | 0.121020284 | 0.178103661 | no |
| KLRK1     | -0.058677244 | -1.551797421 | 0.121164624 | 0.178303105 | no |
| KDM4A     | 0.058661914  | 1.551390621  | 0.121262021 | 0.178433446 | no |
| CXorf42   | 0.058659884  | 1.551336724  | 0.12127493  | 0.178439454 | no |
| THUMP2    | -0.058652575 | -1.551142769 | 0.121321393 | 0.178494827 | no |
| SMAD5     | -0.05864353  | -1.550902743 | 0.121378911 | 0.178566458 | no |
| KIAA0494  | 0.058615774  | 1.55016616   | 0.121555556 | 0.178813317 | no |
| OR2L8     | -0.058599404 | -1.549731746 | 0.12165983  | 0.178953688 | no |
| DMRTB1    | -0.058592006 | -1.549535435 | 0.121706974 | 0.17901001  | no |
| KLC3      | -0.058585097 | -1.549352079 | 0.12175102  | 0.179061768 | no |
| PRR23A    | -0.058568561 | -1.548913267 | 0.121856483 | 0.179203839 | no |
| SORBS1    | -0.058556801 | -1.548601181 | 0.121931532 | 0.179301165 | no |
| SLC2A7    | 0.05854568   | 1.548306075  | 0.122002532 | 0.179392523 | no |
| SLC22A13  | -0.058543102 | -1.54823766  | 0.122018996 | 0.179403685 | no |
| C7orf60   | -0.058513455 | -1.547450909 | 0.122208458 | 0.179669184 | no |
| LHCGR     | 0.058505904  | 1.547250534  | 0.122256749 | 0.17972711  | no |
| HIST1H2AE | 0.058498384  | 1.547050967  | 0.122304859 | 0.179784764 | no |
| C11orf92  | -0.058477187 | -1.546488476 | 0.122440541 | 0.179971127 | no |
| FGF2      | -0.058466331 | -1.546200378 | 0.12251008  | 0.18006025  | no |
| MEF2B     | -0.058458507 | -1.545992777 | 0.122560209 | 0.180120833 | no |
| RPL37A    | -0.058450186 | -1.545771968 | 0.122613545 | 0.18018612  | no |
| CCDC52    | 0.058446494  | 1.545673994  | 0.122637216 | 0.180207808 | no |
| PCID2     | 0.058442949  | 1.545579917  | 0.122659949 | 0.180228113 | no |
| PHPT1     | 0.058373116  | 1.543726781  | 0.123108416 | 0.180873916 | no |
| ABCA11P   | -0.058348567 | -1.54307536  | 0.123266368 | 0.181092822 | no |
| IFNA1     | -0.058326553 | -1.542491185 | 0.123408148 | 0.181287942 | no |
| RNF113A   | -0.058318207 | -1.542269715 | 0.123461933 | 0.181353775 | no |
| HBG2      | 0.058311425  | 1.542089764  | 0.123505648 | 0.181404809 | no |
| PLDN      | -0.058309111 | -1.542028355 | 0.123520569 | 0.181413546 | no |
| C12orf68  | -0.058307238 | -1.541978651 | 0.123532647 | 0.181418105 | no |
| RNF31     | -0.058300482 | -1.541799369 | 0.123576219 | 0.18145111  | no |
| LDB3      | -0.058299754 | -1.541780046 | 0.123580916 | 0.18145111  | no |

|              |              |              |             |             |    |
|--------------|--------------|--------------|-------------|-------------|----|
| LOC441869    | 0.058299579  | 1.541775402  | 0.123582045 | 0.18145111  | no |
| BHMT         | -0.058285181 | -1.54139333  | 0.123674946 | 0.181574327 | no |
| COX16        | -0.058282991 | -1.541335222 | 0.12368908  | 0.181581892 | no |
| SPATA3       | 0.05826196   | 1.540777162  | 0.123824883 | 0.18176806  | no |
| WFDC3        | 0.058257293  | 1.540653305  | 0.12385504  | 0.181797958 | no |
| HS3ST2       | -0.058256025 | -1.540619652 | 0.123863234 | 0.181797958 | no |
| TCFL5        | -0.058253489 | -1.540552378 | 0.123879617 | 0.181808805 | no |
| PIN4         | -0.058246241 | -1.540360048 | 0.123926464 | 0.181864357 | no |
| NUP50        | 0.058233349  | 1.540017944  | 0.124009825 | 0.181973483 | no |
| TMEM211      | -0.05822773  | -1.539868834 | 0.124046173 | 0.18201361  | no |
| SRMS         | -0.058216822 | -1.539579392 | 0.124116753 | 0.182103955 | no |
| CHMP7        | -0.058214822 | -1.539526329 | 0.124129696 | 0.18210973  | no |
| ZC3H10       | 0.058212233  | 1.539457622  | 0.124146456 | 0.182121103 | no |
| PRODH        | -0.058209064 | -1.539373513 | 0.124166975 | 0.182137989 | no |
| TMSB4Y       | -0.058196163 | -1.539031196 | 0.124250515 | 0.18224731  | no |
| MYH2         | 0.058168745  | 1.538303634  | 0.124428218 | 0.182494719 | no |
| TAF7L        | 0.058162846  | 1.538147111  | 0.124466473 | 0.182534132 | no |
| FOXA3        | 0.058161817  | 1.538119811  | 0.124473147 | 0.182534132 | no |
| PRRG3        | -0.058143701 | -1.537639095 | 0.124590701 | 0.182683181 | no |
| SSX6         | -0.058143369 | -1.537630281 | 0.124592857 | 0.182683181 | no |
| GNA12        | 0.058139088  | 1.537516677  | 0.124620651 | 0.182710683 | no |
| OR7E37P      | -0.058127813 | -1.5372175   | 0.124693869 | 0.182804774 | no |
| MAN1A2       | 0.058105626  | 1.536628759  | 0.124838051 | 0.183002879 | no |
| OLA1         | -0.058071698 | -1.535728483 | 0.125058779 | 0.183313158 | no |
| SFXN5        | -0.058065915 | -1.535575029 | 0.125096433 | 0.183355059 | no |
| MRAP         | 0.058058317  | 1.535373442  | 0.125145911 | 0.183414283 | no |
| HRG          | -0.058037328 | -1.534816485 | 0.125282692 | 0.18360144  | no |
| FLJ40330     | -0.058035712 | -1.534773622 | 0.125293223 | 0.183603565 | no |
| SNRNP27      | -0.057981401 | -1.533332494 | 0.125647709 | 0.184109681 | no |
| RNF10        | 0.057973655  | 1.533126967  | 0.125698328 | 0.184170505 | no |
| VCX          | 0.057966231  | 1.532929962  | 0.125746863 | 0.184228266 | no |
| CCNA1        | 0.057948062  | 1.532447862  | 0.125865697 | 0.184389005 | no |
| ARL6IP1      | -0.05793527  | -1.532108427 | 0.125949417 | 0.184498284 | no |
| TCOF1        | -0.057897773 | -1.531113473 | 0.12619507  | 0.184844739 | no |
| TRPC4AP      | 0.05788458   | 1.530763413  | 0.126281589 | 0.184958067 | no |
| CES7         | -0.057873079 | -1.530458246 | 0.126357049 | 0.185055185 | no |
| LMBR1        | -0.057861181 | -1.530142558 | 0.126435149 | 0.185156152 | no |
| TSPAN15      | -0.057832943 | -1.5293933   | 0.126620661 | 0.185414393 | no |
| COX18        | 0.057821703  | 1.529095042  | 0.126694567 | 0.185509181 | no |
| STON1-GTF2A1 | 0.057803974  | 1.528624648  | 0.126811196 | 0.185666504 | no |
| PNLIPRP2     | 0.057792232  | 1.528313074  | 0.126888493 | 0.185766224 | no |
| PRMT10       | 0.057790794  | 1.52827493   | 0.126897959 | 0.185766631 | no |
| SMAD1        | 0.057782703  | 1.528060241  | 0.126951245 | 0.185831181 | no |
| ZNF165       | 0.057779983  | 1.527988063  | 0.126969163 | 0.185843955 | no |
| LIN52        | -0.057776654 | -1.527899733 | 0.126991094 | 0.185862599 | no |
| ZNF507       | -0.057764672 | -1.527581822 | 0.127070051 | 0.185964698 | no |
| ANKMY2       | 0.057760172  | 1.527462414  | 0.127099718 | 0.185994651 | no |
| CCDC56       | -0.057747204 | -1.527118323 | 0.127185236 | 0.186106325 | no |
| LOC286359    | -0.057744933 | -1.527058078 | 0.127200213 | 0.186114771 | no |
| SLC28A1      | 0.057737198  | 1.526852832  | 0.127251249 | 0.186175972 | no |
| KLK12        | -0.0577317   | -1.526706968 | 0.127287529 | 0.186215577 | no |



|              |              |              |             |             |    |
|--------------|--------------|--------------|-------------|-------------|----|
| LEPR         | 0.057724793  | 1.526523682  | 0.127333129 | 0.186268808 | no |
| NASP         | -0.057715738 | -1.526283421 | 0.127392922 | 0.186342794 | no |
| RP9          | 0.057686307  | 1.525502525  | 0.127587414 | 0.186613784 | no |
| LOC285548    | 0.057680618  | 1.525351576  | 0.127625036 | 0.186644373 | no |
| CCNL1        | 0.057680352  | 1.525344538  | 0.127626791 | 0.186644373 | no |
| TREML2P1     | 0.05766695   | 1.524988942  | 0.127715454 | 0.186760528 | no |
| CUTC         | -0.057651561 | -1.524580608 | 0.127817327 | 0.18689598  | no |
| ST3GAL6      | -0.057625496 | -1.523889047 | 0.127990004 | 0.187129721 | no |
| CHEK1        | 0.057624638  | 1.523866276  | 0.127995693 | 0.187129721 | no |
| OSBP2        | -0.057590437 | -1.52295882  | 0.128222561 | 0.187447847 | no |
| NIPSNAP1     | -0.05757662  | -1.522592222 | 0.1283143   | 0.187568399 | no |
| NCAPD3       | -0.057574916 | -1.522547013 | 0.128325617 | 0.18757138  | no |
| NCAPD2       | 0.057572853  | 1.52249227   | 0.128339322 | 0.187573831 | no |
| SH2D4B       | 0.05757187   | 1.522466198  | 0.128345849 | 0.187573831 | no |
| ZCCHC2       | 0.057567406  | 1.522347759  | 0.128375505 | 0.187603611 | no |
| CATSPER2P1   | 0.057561496  | 1.52219095   | 0.128414776 | 0.187647437 | no |
| KLK8         | 0.057550875  | 1.521909157  | 0.128485372 | 0.187737027 | no |
| FLJ40852     | 0.057546926  | 1.52180437   | 0.128511631 | 0.187761826 | no |
| FLJ42875     | -0.057538635 | -1.521584401 | 0.128566768 | 0.187828811 | no |
| FMR1NB       | -0.057510441 | -1.520836327 | 0.128754416 | 0.188089363 | no |
| ZNF706       | -0.057498389 | -1.520516577 | 0.128834688 | 0.188193029 | no |
| ZNF296       | -0.057486623 | -1.520204383 | 0.128913101 | 0.188293965 | no |
| LIM2         | 0.057459474  | 1.519484085  | 0.129094157 | 0.188544799 | no |
| FLJ46361     | -0.057430498 | -1.518715275 | 0.129287625 | 0.188801019 | no |
| LONRF1       | -0.057430402 | -1.518712741 | 0.129288263 | 0.188801019 | no |
| RBM15        | 0.057399147  | 1.517883491  | 0.129497195 | 0.189092466 | no |
| MT4          | -0.057395427 | -1.517784795 | 0.129522079 | 0.189104608 | no |
| RAX2         | -0.057395108 | -1.517776318 | 0.129524217 | 0.189104608 | no |
| CHN2         | 0.057376439  | 1.517281011  | 0.129649156 | 0.189273351 | no |
| HNRNPA2B1    | -0.057371279 | -1.517144089 | 0.129683711 | 0.189310128 | no |
| IL17C        | -0.057333091 | -1.51613092  | 0.129939624 | 0.189670011 | no |
| ZBP2         | 0.057324152  | 1.515893742  | 0.129999589 | 0.189743842 | no |
| INPP4B       | 0.057318688  | 1.515748779  | 0.13003625  | 0.18978365  | no |
| CCDC117      | 0.057313716  | 1.51561686   | 0.13006962  | 0.189818649 | no |
| ALX4         | 0.057298937  | 1.515224767  | 0.13016884  | 0.189949737 | no |
| ATP6V0A2     | 0.0572925    | 1.515053973  | 0.130212078 | 0.189999119 | no |
| CLN8         | -0.05727573  | -1.514609058 | 0.130324766 | 0.190149824 | no |
| PLAC9        | 0.057272104  | 1.514512837  | 0.130349146 | 0.190171672 | no |
| NAPA         | 0.057263147  | 1.514275209  | 0.130409372 | 0.19024581  | no |
| RESP18       | -0.057235616 | -1.513544773 | 0.130594634 | 0.190502331 | no |
| CDC25B       | 0.057219157  | 1.51310811   | 0.130705483 | 0.190650274 | no |
| SELV         | -0.057213636 | -1.512961639 | 0.130742682 | 0.190690776 | no |
| ATXN7L1      | 0.057209492  | 1.512851683  | 0.130770612 | 0.190717755 | no |
| LOC100134229 | 0.057189518  | 1.512321757  | 0.130905287 | 0.190900396 | no |
| LOC100132247 | 0.057160803  | 1.511559918  | 0.131099089 | 0.19116923  | no |
| EIF5A2       | 0.057150035  | 1.511274235  | 0.13117182  | 0.19124695  | no |
| EDF1         | -0.057148871 | -1.511243359 | 0.131179683 | 0.19124695  | no |
| FKBP3        | -0.057148711 | -1.51123911  | 0.131180765 | 0.19124695  | no |
| LOC100133331 | 0.057127397  | 1.510673648  | 0.131324824 | 0.191443168 | no |
| MTX1         | -0.057109786 | -1.510206424 | 0.131443949 | 0.191603012 | no |
| PHB2         | -0.057078671 | -1.509380914 | 0.131654629 | 0.191882467 | no |

|              |              |              |             |             |    |
|--------------|--------------|--------------|-------------|-------------|----|
| TUBB         | 0.057078669  | 1.509380858  | 0.131654644 | 0.191882467 | no |
| CPEB1        | -0.057069122 | -1.509127575 | 0.131719337 | 0.191962918 | no |
| PRO0611      | -0.057066084 | -1.50904699  | 0.131739925 | 0.191979084 | no |
| DUT          | -0.057064047 | -1.508992946 | 0.131753734 | 0.191985369 | no |
| TRA2B        | 0.057054863  | 1.508749298  | 0.131816002 | 0.192062261 | no |
| LHX2         | -0.05705341  | -1.50871074  | 0.131825859 | 0.192062781 | no |
| CBX2         | -0.057034512 | -1.508209372 | 0.131954071 | 0.192235726 | no |
| TUBA1A       | 0.057028104  | 1.508039367  | 0.131997567 | 0.192285238 | no |
| SNORA3       | 0.057025832  | 1.507979088  | 0.132012993 | 0.192293854 | no |
| PLCZ1        | 0.057022576  | 1.507892702  | 0.132035101 | 0.192304606 | no |
| LOC151174    | 0.057021943  | 1.507875916  | 0.132039398 | 0.192304606 | no |
| PYY2         | 0.057007756  | 1.507499531  | 0.13213576  | 0.192431089 | no |
| RPS26        | 0.057003818  | 1.507395065  | 0.132162516 | 0.19245619  | no |
| STX18        | 0.056997281  | 1.507221649  | 0.13220694  | 0.192507015 | no |
| CARD18       | -0.056992912 | -1.50710573  | 0.132236641 | 0.192536397 | no |
| WDR75        | -0.056985548 | -1.506910354 | 0.132286713 | 0.192584709 | no |
| LOC100128076 | 0.05698523   | 1.506901924  | 0.132288873 | 0.192584709 | no |
| GMNN         | -0.05696597  | -1.506390954 | 0.132419899 | 0.192760242 | no |
| COPS5        | 0.056964703  | 1.506357357  | 0.132428517 | 0.192760242 | no |
| CRLF1        | -0.056934914 | -1.505567051 | 0.132631379 | 0.193041626 | no |
| SLC22A14     | -0.056928531 | -1.505397715 | 0.132674877 | 0.193091035 | no |
| GON4L        | -0.056915424 | -1.505049994 | 0.132764232 | 0.193207172 | no |
| HSFY1        | -0.056906239 | -1.504806323 | 0.132826876 | 0.193284424 | no |
| OR4F17       | 0.056898605  | 1.504603787  | 0.132878963 | 0.193346303 | no |
| DERA         | 0.056883294  | 1.504197603  | 0.132983471 | 0.193484442 | no |
| MINPP1       | -0.056873213 | -1.503930162 | 0.133052315 | 0.193570678 | no |
| PGR          | -0.056861679 | -1.503624165 | 0.133131119 | 0.19367139  | no |
| CDC42BPA     | -0.05685677  | -1.503493946 | 0.133164666 | 0.193706254 | no |
| GPC3         | 0.056850516  | 1.50332803   | 0.133207418 | 0.193754502 | no |
| OXTR         | 0.056838396  | 1.503006494  | 0.1332903   | 0.193861109 | no |
| GET4         | -0.05682342  | -1.502609196 | 0.133392765 | 0.193996183 | no |
| YRDC         | 0.056816089  | 1.502414695  | 0.133442951 | 0.19405521  | no |
| HDDC3        | 0.056811266  | 1.502286741  | 0.133475974 | 0.194089272 | no |
| OR3A3        | -0.05680443  | -1.502105405 | 0.133522784 | 0.194143377 | no |
| AZU1         | -0.05678802  | -1.501670045 | 0.133635222 | 0.194292889 | no |
| ZFP28        | -0.056774732 | -1.50131754  | 0.133726314 | 0.194411348 | no |
| C9orf153     | -0.0567648   | -1.501054043 | 0.133794437 | 0.1944964   | no |
| KIRREL3      | -0.056756085 | -1.500822854 | 0.13385423  | 0.194569331 | no |
| OXR1         | -0.056747677 | -1.500599809 | 0.133911936 | 0.194639218 | no |
| DBT          | -0.056744609 | -1.500518408 | 0.133933001 | 0.194655841 | no |
| SLC36A3      | -0.056733187 | -1.500215398 | 0.134011435 | 0.194755836 | no |
| 2-Sep        | -0.056706642 | -1.499511189 | 0.134193859 | 0.195006931 | no |
| MED27        | -0.056694258 | -1.499182657 | 0.13427903  | 0.195116676 | no |
| RPS7         | -0.056683227 | -1.498890041 | 0.134354925 | 0.195212926 | no |
| AMY1A        | -0.056661333 | -1.498309205 | 0.134505674 | 0.195417916 | no |
| SYT10        | -0.056653912 | -1.498112335 | 0.134556799 | 0.195478146 | no |
| SRRM1        | 0.056645527  | 1.497889901  | 0.13461458  | 0.195548037 | no |
| FSCN1        | 0.056643243  | 1.497829305  | 0.134630325 | 0.195556858 | no |
| CLK1         | -0.05663507  | -1.497612507 | 0.134686666 | 0.195624641 | no |
| ATXN3        | -0.05660588  | -1.496838148 | 0.134888055 | 0.195903074 | no |
| TRAPPC4      | -0.056591517 | -1.496457129 | 0.134987232 | 0.196033031 | no |

|             |              |              |             |             |    |
|-------------|--------------|--------------|-------------|-------------|----|
| NSUN5P2     | -0.056587388 | -1.496347575 | 0.135015759 | 0.196060376 | no |
| SEBOX       | -0.056551465 | -1.495394619 | 0.135264098 | 0.196392608 | no |
| GOLGA2      | 0.056551339  | 1.495391279  | 0.135264969 | 0.196392608 | no |
| COX11       | 0.056549951  | 1.495354453  | 0.135274573 | 0.196392608 | no |
| CHRD1       | -0.056548675 | -1.495320594 | 0.135283403 | 0.196392608 | no |
| ZSWIM3      | -0.056546093 | -1.49525211  | 0.135301266 | 0.196404437 | no |
| UBA1        | -0.056542898 | -1.49516735  | 0.135323376 | 0.19641394  | no |
| MRPL24      | -0.056542339 | -1.495152529 | 0.135327242 | 0.19641394  | no |
| BMP4        | -0.056537369 | -1.495020679 | 0.135361643 | 0.196449766 | no |
| SNORD116-20 | -0.056531669 | -1.494869474 | 0.135401101 | 0.196492927 | no |
| C4orf14     | -0.056528044 | -1.494773319 | 0.135426198 | 0.196502415 | no |
| FATE1       | 0.056527917  | 1.49476995   | 0.135427077 | 0.196502415 | no |
| NHLH2       | 0.056521103  | 1.494589168  | 0.135474272 | 0.196556788 | no |
| LCE3A       | 0.056510436  | 1.494306219  | 0.135548165 | 0.196638711 | no |
| C1orf101    | 0.056510144  | 1.494298473  | 0.135550189 | 0.196638711 | no |
| OR4M1       | -0.056501974 | -1.494081726 | 0.135606814 | 0.196706742 | no |
| DEPDC1B     | 0.056484557  | 1.493619694  | 0.135727583 | 0.1968678   | no |
| EIF3G       | -0.056482993 | -1.493578204 | 0.135738431 | 0.196869412 | no |
| ATAD3B      | -0.056461549 | -1.493009356 | 0.135887244 | 0.197068708 | no |
| C4orf21     | -0.056459457 | -1.492953866 | 0.135901766 | 0.197068708 | no |
| WDFY1       | 0.056458979  | 1.492941189  | 0.135905085 | 0.197068708 | no |
| KTN1        | -0.056457162 | -1.492892965 | 0.135917707 | 0.197072877 | no |
| SEC14L5     | -0.056427903 | -1.492116816 | 0.136120988 | 0.19735347  | no |
| HOXC13      | 0.056400119  | 1.491379773  | 0.136314245 | 0.197616476 | no |
| LOC344967   | -0.056399013 | -1.49135044  | 0.13632194  | 0.197616476 | no |
| CCKAR       | 0.05637516   | 1.490717687  | 0.136488028 | 0.197843056 | no |
| CEP152      | 0.05636623   | 1.490480807  | 0.136550246 | 0.197919053 | no |
| RAE1        | 0.056358787  | 1.490283357  | 0.136602123 | 0.197980052 | no |
| IFT74       | 0.056352694  | 1.490121716  | 0.136644604 | 0.198027425 | no |
| ADAM21      | 0.056333987  | 1.489625495  | 0.136775079 | 0.198202305 | no |
| RPS19       | 0.056329611  | 1.489509416  | 0.136805615 | 0.198232346 | no |
| LOC285401   | -0.056322008 | -1.489307713 | 0.136858687 | 0.198295036 | no |
| KRT6A       | -0.056309497 | -1.48897585  | 0.136946041 | 0.198407385 | no |
| RPL26       | -0.056268301 | -1.487883051 | 0.137233997 | 0.198810329 | no |
| DEFB132     | -0.056246287 | -1.487299098 | 0.137388062 | 0.199019261 | no |
| AES         | -0.056233398 | -1.486957202 | 0.137478326 | 0.19913575  | no |
| ADAMTS17    | 0.056173413  | 1.485366002  | 0.137899027 | 0.19973082  | no |
| CTRL        | -0.056153273 | -1.484831765 | 0.138040497 | 0.199921402 | no |
| ZP1         | 0.056147724  | 1.484684579  | 0.138079493 | 0.199963555 | no |
| PCDHGA5     | -0.056142433 | -1.484544227 | 0.138116686 | 0.200003091 | no |
| PMS2CL      | -0.056140207 | -1.484485171 | 0.138132338 | 0.200011431 | no |
| MORC3       | -0.056132595 | -1.484283262 | 0.138185862 | 0.200074603 | no |
| SPRR2A      | -0.056111629 | -1.483727132 | 0.138333369 | 0.200273831 | no |
| ITGB8       | 0.056108433  | 1.483642343  | 0.138355869 | 0.200292063 | no |
| UBE2J1      | 0.056106181  | 1.483582601  | 0.138371724 | 0.200300674 | no |
| C5orf60     | 0.056092547  | 1.483220966  | 0.138467729 | 0.200425297 | no |
| DGAT2       | -0.056083068 | -1.482969508 | 0.138534515 | 0.200507612 | no |
| RAD23B      | 0.056075821  | 1.482777297  | 0.138585582 | 0.200561731 | no |
| LGSN        | 0.056074025  | 1.482729653  | 0.138598243 | 0.200561731 | no |
| SLC04C1     | 0.05607354   | 1.482716768  | 0.138601667 | 0.200561731 | no |
| C1orf180    | 0.056069045  | 1.482597547  | 0.138633352 | 0.200593224 | no |

|              |              |              |             |             |    |
|--------------|--------------|--------------|-------------|-------------|----|
| IMPA1        | 0.056064995  | 1.482490114  | 0.138661909 | 0.200620186 | no |
| SBDS         | 0.056056078  | 1.482253585  | 0.138724798 | 0.200696813 | no |
| IL17RE       | -0.056039572 | -1.481815768 | 0.138841263 | 0.200850934 | no |
| ERI2         | -0.056034991 | -1.481694239 | 0.138873604 | 0.200883346 | no |
| KLK3         | 0.056013674  | 1.481128785  | 0.139024161 | 0.201086743 | no |
| ATPBD4       | 0.055991387  | 1.480537612  | 0.139181701 | 0.201300209 | no |
| TMEM134      | 0.05597348   | 1.480062634  | 0.139308375 | 0.201469008 | no |
| TIA1         | -0.055930619 | -1.47892573  | 0.139611945 | 0.201886154 | no |
| RBM44        | 0.055929936  | 1.478907611  | 0.139616787 | 0.201886154 | no |
| LOC100131726 | 0.055872781  | 1.477391575  | 0.140022394 | 0.202458182 | no |
| TMEM185A     | -0.055869899 | -1.477315128 | 0.140042871 | 0.20247331  | no |
| ANKRD10      | 0.055865654  | 1.477202548  | 0.140073031 | 0.202502434 | no |
| C6orf227     | -0.055854067 | -1.476895212 | 0.14015539  | 0.202597016 | no |
| PLEKHG5      | 0.055853631  | 1.476883627  | 0.140158496 | 0.202597016 | no |
| KLHL14       | 0.055842164  | 1.476579483  | 0.140240038 | 0.202700393 | no |
| PAPLN        | -0.055826016 | -1.476151166 | 0.140354934 | 0.202851959 | no |
| SHBG         | -0.055817182 | -1.475916836 | 0.140417824 | 0.202928346 | no |
| DMTF1        | -0.055781027 | -1.474957849 | 0.140675423 | 0.203285472 | no |
| MRGPRE       | 0.055779677  | 1.474922041  | 0.140685049 | 0.203285472 | no |
| SNTG2        | 0.055775621  | 1.474814462  | 0.140713971 | 0.203312732 | no |
| ABHD8        | -0.055772527 | -1.474732386 | 0.140736039 | 0.203330087 | no |
| C12orf52     | 0.055767382  | 1.474595904  | 0.140772742 | 0.203345812 | no |
| PFDN4        | -0.05576737  | -1.474595594 | 0.140772826 | 0.203345812 | no |
| MIP          | -0.055766771 | -1.474579715 | 0.140777097 | 0.203345812 | no |
| FIGNL1       | 0.055740527  | 1.4738836    | 0.140964417 | 0.203601841 | no |
| FAM53B       | 0.055719821  | 1.4733344    | 0.141112338 | 0.203800933 | no |
| ZNF367       | 0.055712816  | 1.473148586  | 0.141162413 | 0.20385869  | no |
| RPL32        | -0.055705157 | -1.472945438 | 0.141217174 | 0.203923207 | no |
| GSTM2P1      | -0.055699012 | -1.472782461 | 0.141261118 | 0.203972096 | no |
| DYNC2H1      | -0.05569403  | -1.472650311 | 0.141296758 | 0.204008988 | no |
| FOXB1        | 0.055687424  | 1.472475088  | 0.141344026 | 0.204062661 | no |
| VPS8         | -0.055685345 | -1.472419949 | 0.141358902 | 0.204069567 | no |
| ZNF221       | -0.055672708 | -1.472084771 | 0.141449359 | 0.204168574 | no |
| POLR2H       | 0.055671756  | 1.472059506  | 0.14145618  | 0.204168574 | no |
| PDX1         | 0.055671532  | 1.472053579  | 0.14145778  | 0.204168574 | no |
| FAT1         | -0.055667508 | -1.471946827 | 0.141486601 | 0.204195595 | no |
| PRAMEF5      | 0.055657229  | 1.471674193  | 0.141560226 | 0.20428727  | no |
| PAOX         | 0.055634998  | 1.471084539  | 0.141719565 | 0.204502617 | no |
| ART3         | 0.055617765  | 1.470627477  | 0.14184317  | 0.204666372 | no |
| PELI1        | -0.055611338 | -1.470456995 | 0.141889295 | 0.204718316 | no |
| LOC646498    | 0.055595628  | 1.470040298  | 0.142002084 | 0.204866428 | no |
| LRRC3B       | -0.05558728  | -1.469818899 | 0.142062039 | 0.204938302 | no |
| KIAA1715     | -0.055568914 | -1.469331762 | 0.142194024 | 0.205114068 | no |
| PSORS1C2     | 0.05556489   | 1.469225036  | 0.142222953 | 0.205141162 | no |
| HPD          | 0.055561867  | 1.469144843  | 0.142244693 | 0.205157883 | no |
| IL28B        | -0.055533702 | -1.468397809 | 0.142447334 | 0.205435495 | no |
| ASAP2        | -0.055527148 | -1.468223988 | 0.142494517 | 0.205488884 | no |
| GTF3C2       | -0.055525114 | -1.468170025 | 0.142509167 | 0.205495353 | no |
| SLC38A2      | 0.055496071  | 1.467399725  | 0.142718422 | 0.205782418 | no |
| TNNC1        | 0.055486129  | 1.467136013  | 0.142790115 | 0.205871107 | no |
| MIR17HG      | -0.05547611  | -1.466870294 | 0.142862381 | 0.205960612 | no |

|            |              |              |             |             |    |
|------------|--------------|--------------|-------------|-------------|----|
| SPINK9     | -0.055468555 | -1.466669916 | 0.142916895 | 0.206024513 | no |
| ZNF366     | 0.055464163  | 1.466553425  | 0.142948595 | 0.206055518 | no |
| PSPN       | -0.055455359 | -1.466319911 | 0.143012155 | 0.206132441 | no |
| TESC       | 0.055443776  | 1.466012704  | 0.143095807 | 0.206238311 | no |
| SH3RF3     | -0.055437922 | -1.46585742  | 0.143138105 | 0.206284568 | no |
| ARIH2      | -0.055431605 | -1.465689895 | 0.143183748 | 0.206335639 | no |
| NCRNA00167 | -0.055424672 | -1.465506001 | 0.143233864 | 0.206393148 | no |
| NR6A1      | -0.055413832 | -1.4652185   | 0.143312242 | 0.20649137  | no |
| ZNF558     | 0.055404779  | 1.464978386  | 0.143377727 | 0.206571002 | no |
| MXD1       | 0.055395862  | 1.464741879  | 0.14344225  | 0.206649239 | no |
| ABTB1      | 0.055387589  | 1.464522449  | 0.143502135 | 0.20671253  | no |
| OR52A4     | -0.055386965 | -1.464505914 | 0.143506648 | 0.20671253  | no |
| AASS       | -0.055385555 | -1.464468521 | 0.143516855 | 0.20671253  | no |
| CLCA1      | 0.055381826  | 1.464369592  | 0.143543863 | 0.206736701 | no |
| NIPSNAP3B  | 0.055375093  | 1.464191035  | 0.143592618 | 0.206792189 | no |
| KARS       | -0.055359992 | -1.463790516 | 0.143702026 | 0.206935011 | no |
| GPR143     | 0.055348564  | 1.463487399  | 0.14378487  | 0.207039562 | no |
| IQSEC1     | -0.055341127 | -1.463290157 | 0.143838797 | 0.207102464 | no |
| ZNF611     | 0.055337945  | 1.463205777  | 0.143861872 | 0.207120937 | no |
| ZNF326     | -0.055334087 | -1.463103441 | 0.14388986  | 0.207133075 | no |
| OR2M1P     | -0.055333959 | -1.463100035 | 0.143890792 | 0.207133075 | no |
| PRKACG     | -0.055328132 | -1.462945511 | 0.143933063 | 0.207179173 | no |
| TCTE1      | -0.055326219 | -1.462894754 | 0.14394695  | 0.207182688 | no |
| UTP14A     | 0.055324971  | 1.462861676  | 0.143956    | 0.207182688 | no |
| GAK        | -0.055321187 | -1.462761298 | 0.143983467 | 0.207207469 | no |
| CPLX4      | 0.055277478  | 1.461602043  | 0.144300974 | 0.207649615 | no |
| PEX1       | 0.055232883  | 1.460419279  | 0.144625474 | 0.20810176  | no |
| ZNF302     | -0.055224458 | -1.460195842 | 0.144686838 | 0.208175242 | no |
| MSH6       | 0.055220431  | 1.460089025  | 0.144716182 | 0.208202644 | no |
| GOLGA9P    | 0.055216198  | 1.459976775  | 0.144747022 | 0.208232197 | no |
| HECTD2     | -0.055194994 | -1.459414382 | 0.144901615 | 0.208439762 | no |
| RHOT1      | -0.055179034 | -1.458991111 | 0.145018049 | 0.20859241  | no |
| UQCRHL     | 0.05517259   | 1.458820198  | 0.145065084 | 0.208645221 | no |
| DDI1       | 0.055135952  | 1.457848506  | 0.145332717 | 0.209015285 | no |
| C16orf73   | -0.055130125 | -1.457693956 | 0.145375319 | 0.209061683 | no |
| HAND2      | 0.055113012  | 1.457240106  | 0.145500481 | 0.209226794 | no |
| AMOTL1     | -0.055107249 | -1.457087245 | 0.145542655 | 0.209272555 | no |
| FTSJ1      | 0.055099852  | 1.456891079  | 0.145596791 | 0.209335508 | no |
| TMEM117    | -0.055095559 | -1.456777214 | 0.145628221 | 0.209365809 | no |
| NOX3       | -0.055087492 | -1.456563259 | 0.145687294 | 0.209435843 | no |
| PALM2      | -0.055059289 | -1.455815275 | 0.145893954 | 0.209718021 | no |
| C1orf130   | 0.055057345  | 1.455763727  | 0.145908205 | 0.209723595 | no |
| THRAP3     | 0.055048642  | 1.455532911  | 0.145972027 | 0.209800416 | no |
| GAL3ST2    | -0.05503434  | -1.455153608 | 0.146076954 | 0.209936299 | no |
| KRTAP10-4  | -0.055020136 | -1.454776912 | 0.146181217 | 0.210071209 | no |
| MST1R      | -0.055015249 | -1.454647284 | 0.146217109 | 0.210107854 | no |
| LRRC23     | 0.054999319  | 1.454224822  | 0.146334128 | 0.210261062 | no |
| SNORD88B   | 0.054989935  | 1.453975928  | 0.146403105 | 0.210345222 | no |
| LACE1      | -0.054982753 | -1.45378546  | 0.146455906 | 0.210406132 | no |
| UBA52      | 0.0549812    | 1.453744274  | 0.146467325 | 0.210407587 | no |
| PRDM13     | 0.054952805  | 1.45299121   | 0.146676244 | 0.210692739 | no |

|           |              |              |             |             |    |
|-----------|--------------|--------------|-------------|-------------|----|
| ARMC4     | 0.054928108  | 1.45233624   | 0.146858135 | 0.210939029 | no |
| HDHD1A    | 0.054922614  | 1.452190526  | 0.146898624 | 0.210982197 | no |
| ZAR1L     | -0.054918132 | -1.452071678 | 0.146931655 | 0.211014647 | no |
| PTPLAD1   | -0.054912747 | -1.451928862 | 0.146971354 | 0.211056669 | no |
| FAM174A   | -0.05491123  | -1.451888616 | 0.146982543 | 0.211057745 | no |
| CNP       | -0.054900553 | -1.451605451 | 0.147061285 | 0.211155817 | no |
| ZCCHC12   | -0.054878793 | -1.451028362 | 0.147221861 | 0.211371366 | no |
| RPL9      | -0.054873797 | -1.450895876 | 0.147258744 | 0.211409308 | no |
| SPDYE3    | 0.054844244  | 1.450112112  | 0.147477084 | 0.211707731 | no |
| MMP3      | 0.054833345  | 1.449823069  | 0.147557668 | 0.211808373 | no |
| PRDM4     | -0.054815218 | -1.449342355 | 0.147691764 | 0.211985807 | no |
| TAS2R13   | -0.054809977 | -1.44920334  | 0.147730559 | 0.212012693 | no |
| COL17A1   | -0.054809854 | -1.449200086 | 0.147731468 | 0.212012693 | no |
| PMPCB     | 0.054791494  | 1.448713186  | 0.147867412 | 0.212192727 | no |
| UGT3A2    | 0.054787202  | 1.448599352  | 0.147899209 | 0.212223293 | no |
| PPFIBP2   | -0.054785098 | -1.448543555 | 0.147914796 | 0.212230597 | no |
| IL3       | 0.054782455  | 1.448473473  | 0.147934376 | 0.212243628 | no |
| FCRLA     | 0.054757098  | 1.447800987  | 0.148122359 | 0.212498251 | no |
| C10orf96  | -0.054747563 | -1.447548132 | 0.148193088 | 0.212584636 | no |
| RPL29     | -0.054740512 | -1.447361148 | 0.148245408 | 0.212644602 | no |
| CDC25C    | 0.05470718   | 1.446477194  | 0.148492939 | 0.212984552 | no |
| KRT2      | 0.054701439  | 1.446324928  | 0.14853561  | 0.213030642 | no |
| FAM150A   | -0.054686275 | -1.445922798 | 0.148648347 | 0.213177208 | no |
| SNORA16A  | 0.054663673  | 1.44532339   | 0.148816512 | 0.213403237 | no |
| RAD51L3   | 0.054656728  | 1.445139214  | 0.148868212 | 0.213462235 | no |
| DNLZ      | -0.054650585 | -1.444976297 | 0.148913956 | 0.213512684 | no |
| C9orf142  | -0.054642879 | -1.444771942 | 0.14897135  | 0.213567725 | no |
| OSGIN1    | 0.054642594  | 1.444764395  | 0.14897347  | 0.213567725 | no |
| C9orf85   | -0.05463709  | -1.444618422 | 0.149014478 | 0.213611367 | no |
| SOX5      | -0.054630993 | -1.444456741 | 0.149059909 | 0.213661343 | no |
| KCNH5     | -0.054625185 | -1.444302705 | 0.149103202 | 0.213708247 | no |
| MET       | 0.054620375  | 1.444175149  | 0.149139059 | 0.213744489 | no |
| SCNN1B    | 0.054618417  | 1.444123227  | 0.149153657 | 0.213750258 | no |
| KIAA1024  | 0.054593171  | 1.443453719  | 0.149341987 | 0.214004982 | no |
| FRG1B     | -0.054588483 | -1.443329406 | 0.149376976 | 0.21403995  | no |
| NR1I3     | -0.054571476 | -1.442878381 | 0.149503972 | 0.21420674  | no |
| ACOT8     | -0.054562803 | -1.442648393 | 0.149568762 | 0.214284384 | no |
| TPI1P3    | -0.05454973  | -1.442301693 | 0.149666472 | 0.214409178 | no |
| HMGXB4    | -0.054543833 | -1.442145315 | 0.14971056  | 0.214457142 | no |
| C1orf114  | 0.054538541  | 1.44200498   | 0.149750133 | 0.214498632 | no |
| KLHL12    | 0.054532581  | 1.441846921  | 0.149794713 | 0.214547288 | no |
| C14orf126 | -0.054526681 | -1.441690459 | 0.149838854 | 0.214595307 | no |
| RPS3      | -0.054516809 | -1.441428665 | 0.149912732 | 0.214685905 | no |
| LIN7A     | 0.054492405  | 1.440781496  | 0.150095482 | 0.214932393 | no |
| SNORA80   | 0.054472802  | 1.440261653  | 0.150242401 | 0.21512754  | no |
| B3GNT6    | 0.054470168  | 1.440191814  | 0.150262148 | 0.215140578 | no |
| C1orf230  | -0.054449644 | -1.439647537 | 0.150416105 | 0.215334583 | no |
| FBXW5     | 0.054449265  | 1.439637487  | 0.150418949 | 0.215334583 | no |
| ZNF607    | -0.054435505 | -1.439272583 | 0.150522237 | 0.21546719  | no |
| C5orf27   | -0.054422151 | -1.438918459 | 0.150622526 | 0.215595485 | no |
| DHRS1     | 0.054415201  | 1.438734174  | 0.150674736 | 0.215654949 | no |

|              |              |              |             |             |    |
|--------------|--------------|--------------|-------------|-------------|----|
| FAM122C      | 0.054363393  | 1.437360293  | 0.151064408 | 0.216197366 | no |
| BOC          | 0.054325858  | 1.436364934  | 0.1513472   | 0.216586756 | no |
| ASPG         | -0.054306711 | -1.435857199 | 0.151491609 | 0.21677807  | no |
| SLC26A3      | 0.054277367  | 1.435079073  | 0.151713126 | 0.217079687 | no |
| SUPT7L       | 0.054272276  | 1.434944053  | 0.151751588 | 0.217119355 | no |
| NPPA         | -0.054267424 | -1.434815382 | 0.151788249 | 0.217156441 | no |
| CARD10       | 0.05425448   | 1.434472141  | 0.151886078 | 0.217281025 | no |
| FRMD7        | 0.054250248  | 1.434359918  | 0.151918074 | 0.217311421 | no |
| MRPL40       | 0.054241024  | 1.434115335  | 0.151987825 | 0.217395815 | no |
| PPIL3        | 0.054238485  | 1.434047987  | 0.152007035 | 0.217407912 | no |
| STRN4        | -0.054229829 | -1.433818461 | 0.152072521 | 0.217486187 | no |
| TNP1         | 0.054219617  | 1.433547664  | 0.152149808 | 0.217581329 | no |
| DFNB31       | 0.054213597  | 1.433388028  | 0.152195384 | 0.217619744 | no |
| C7orf4       | -0.054213225 | -1.433378171 | 0.152198199 | 0.217619744 | no |
| SPOCK3       | -0.054201841 | -1.433076286 | 0.152284415 | 0.217727622 | no |
| C6orf47      | -0.054195535 | -1.432909074 | 0.152332186 | 0.217780522 | no |
| G3BP2        | -0.054189162 | -1.432740076 | 0.152380479 | 0.21783416  | no |
| PPP1R14D     | -0.054177244 | -1.43242404  | 0.152470821 | 0.217947897 | no |
| OR1K1        | -0.054174365 | -1.432347684 | 0.152492654 | 0.217963696 | no |
| CSTF2        | -0.054142834 | -1.43151157  | 0.152731887 | 0.218290209 | no |
| TIMP4        | -0.054139561 | -1.431424792 | 0.152756733 | 0.218310287 | no |
| HIST1H3D     | 0.05410391   | 1.430479425  | 0.153027605 | 0.218681942 | no |
| ATP4B        | 0.054099401  | 1.430359841  | 0.153061895 | 0.218715485 | no |
| TXNRD3IT1    | 0.054095621  | 1.430259606  | 0.153090641 | 0.218741101 | no |
| FLJ40434     | -0.054081617 | -1.429888272 | 0.153197171 | 0.218877847 | no |
| KY           | -0.054074512 | -1.429699858 | 0.153251246 | 0.218939633 | no |
| C8orf41      | 0.054050546  | 1.42906436   | 0.153433741 | 0.219184864 | no |
| CA14         | -0.054032897 | -1.428596381 | 0.153568236 | 0.219361494 | no |
| OR1B1        | -0.054018244 | -1.428207811 | 0.153679977 | 0.219505601 | no |
| TRPV4        | 0.054013214  | 1.428074453  | 0.153718341 | 0.219543653 | no |
| EGR3         | 0.054011904  | 1.428039713  | 0.153728336 | 0.219543653 | no |
| RPL32P3      | -0.054008161 | -1.427940446 | 0.153756899 | 0.219568935 | no |
| FKBPL        | 0.05397702   | 1.427114697  | 0.153994657 | 0.219892928 | no |
| GYS2         | -0.053968046 | -1.426876734 | 0.154063225 | 0.219975302 | no |
| HNRNPR       | -0.053949501 | -1.426384991 | 0.154204993 | 0.220162174 | no |
| CELP         | 0.053945735  | 1.426285133  | 0.154233794 | 0.220187745 | no |
| FAM150B      | 0.053943478  | 1.426225282  | 0.154251058 | 0.220196843 | no |
| ZNF697       | -0.053940985 | -1.426159179 | 0.154270127 | 0.220208517 | no |
| ULK3         | -0.053913327 | -1.425425795 | 0.154481813 | 0.220495114 | no |
| FAM86A       | 0.053904148  | 1.425182383  | 0.15455212  | 0.220579893 | no |
| ZNF546       | 0.053893554  | 1.424901489  | 0.154633285 | 0.220680155 | no |
| CXorf64      | 0.05387992   | 1.42453997   | 0.154737794 | 0.220813715 | no |
| EIF2C1       | -0.053876074 | -1.424437977 | 0.154767288 | 0.220840216 | no |
| ANP32E       | -0.053829236 | -1.423196028 | 0.155126775 | 0.221337554 | no |
| LOC100133469 | 0.053819655  | 1.422941963  | 0.155200393 | 0.221426967 | no |
| PPP1R14B     | -0.053804476 | -1.422539477 | 0.155317073 | 0.2215778   | no |
| KDM4C        | 0.053778116  | 1.421840541  | 0.155519851 | 0.221847682 | no |
| RNU4ATAC     | 0.053777032  | 1.421811797  | 0.155528195 | 0.221847682 | no |
| C20orf4      | 0.053714388  | 1.420150758  | 0.15601093  | 0.222520563 | no |
| LOC100133161 | 0.053667217  | 1.418899994  | 0.156375181 | 0.223024366 | no |
| TFCP2L1      | 0.053664807  | 1.418836095  | 0.156393807 | 0.223035198 | no |

|              |              |              |             |             |    |
|--------------|--------------|--------------|-------------|-------------|----|
| ANAPC13      | -0.053661233 | -1.418741317 | 0.156421438 | 0.223058868 | no |
| ASCC3        | 0.053653039  | 1.418524058  | 0.156484789 | 0.223133469 | no |
| C2orf82      | -0.053642925 | -1.418255894 | 0.15656301  | 0.223229262 | no |
| CEACAM22P    | 0.053639667  | 1.418169497  | 0.156588218 | 0.223249459 | no |
| SNORA71B     | 0.053619465  | 1.417633854  | 0.156744568 | 0.223456613 | no |
| ATP5L        | 0.053616701  | 1.417560565  | 0.15676597  | 0.223471366 | no |
| C1orf116     | -0.053590977 | -1.416878492 | 0.156965255 | 0.223739673 | no |
| C19orf63     | 0.05358408   | 1.416695601  | 0.157018724 | 0.22380011  | no |
| GHRHR        | 0.053571608  | 1.416364927  | 0.157115433 | 0.223922165 | no |
| RIC8B        | -0.053567178 | -1.416247464 | 0.157149798 | 0.223952742 | no |
| SNORA5B      | 0.053565987  | 1.41621587   | 0.157159041 | 0.223952742 | no |
| TAX1BP1      | 0.053564225  | 1.416169157  | 0.15717271  | 0.223956434 | no |
| ZNF585B      | 0.053545792  | 1.415680413  | 0.15731577  | 0.224144485 | no |
| GPR144       | 0.053515281  | 1.414871419  | 0.157552789 | 0.224466373 | no |
| NUDCD2       | 0.053512268  | 1.414791547  | 0.157576205 | 0.224483915 | no |
| ZBTB11       | -0.053503686 | -1.414564002 | 0.157642927 | 0.224563144 | no |
| PLRG1        | 0.053500771  | 1.414486691  | 0.157665602 | 0.224579621 | no |
| DSG3         | -0.053485465 | -1.414080875 | 0.157784665 | 0.224733382 | no |
| SLC37A3      | 0.053478703  | 1.41390157   | 0.157837293 | 0.224792504 | no |
| C20orf201    | -0.053461454 | -1.413444228 | 0.157971589 | 0.224967921 | no |
| C21orf82     | -0.053458382 | -1.413362781 | 0.157995514 | 0.224986146 | no |
| PTPMT1       | -0.053408042 | -1.412028052 | 0.15838799  | 0.225529149 | no |
| TF           | -0.053400986 | -1.411840968 | 0.158443061 | 0.225591677 | no |
| ATP1A4       | -0.053393799 | -1.411650422 | 0.158499166 | 0.225653701 | no |
| RGPD8        | -0.053392547 | -1.411617215 | 0.158508945 | 0.225653701 | no |
| TFF3         | 0.0533752    | 1.411157274  | 0.15864444  | 0.22583069  | no |
| OR5B12       | -0.053372911 | -1.411096593 | 0.158662323 | 0.225840246 | no |
| GPR112       | 0.053358639  | 1.410718192  | 0.158773872 | 0.225983115 | no |
| AQP7P3       | -0.05335087  | -1.410512203 | 0.158834621 | 0.226053665 | no |
| FUT1         | -0.053344771 | -1.410350485 | 0.158882326 | 0.226105643 | no |
| OR51Q1       | -0.053323312 | -1.409781541 | 0.159050245 | 0.226328678 | no |
| FAM59A       | 0.053320845  | 1.409716128  | 0.15906956  | 0.226340232 | no |
| FBX027       | -0.05331693  | -1.40961232  | 0.159100215 | 0.22636792  | no |
| PLK4         | 0.053309766  | 1.409422381  | 0.159156317 | 0.226431808 | no |
| ZNF431       | -0.053308277 | -1.409382882 | 0.159167986 | 0.226432475 | no |
| VTI1B        | -0.053303042 | -1.409244095 | 0.159208991 | 0.226474873 | no |
| LOC100127888 | 0.053263516  | 1.408196108  | 0.159518881 | 0.22689174  | no |
| GNG7         | -0.053261376 | -1.408139382 | 0.159535668 | 0.22689174  | no |
| METTL11A     | 0.053261371  | 1.408139242  | 0.15953571  | 0.22689174  | no |
| RTKN2        | -0.053256239 | -1.408003181 | 0.15957598  | 0.226928617 | no |
| FAM19A4      | -0.053255206 | -1.407975791 | 0.159584087 | 0.226928617 | no |
| NWD1         | 0.053232737  | 1.407380074  | 0.1597605   | 0.227157271 | no |
| RP1L1        | -0.053231865 | -1.407356933 | 0.159767355 | 0.227157271 | no |
| ENPP6        | 0.05318355   | 1.406075964  | 0.160147207 | 0.227681333 | no |
| SNTA1        | -0.053180581 | -1.405997237 | 0.160170575 | 0.227698543 | no |
| C11orf54     | -0.053178592 | -1.405944499 | 0.16018623  | 0.227704787 | no |
| SLC06A1      | -0.053169728 | -1.405709498 | 0.160256003 | 0.227787954 | no |
| C10orf35     | -0.053153773 | -1.405286473 | 0.160381659 | 0.227950537 | no |
| TSTD2        | -0.053126793 | -1.404571165 | 0.160594306 | 0.228230175 | no |
| MYBL2        | 0.053125947  | 1.404548711  | 0.160600984 | 0.228230175 | no |
| KLK14        | -0.053121108 | -1.404420415 | 0.160639148 | 0.228268364 | no |



|            |              |              |             |             |    |
|------------|--------------|--------------|-------------|-------------|----|
| RPUSD3     | -0.053116413 | -1.404295937 | 0.160676182 | 0.228304679 | no |
| ABCE1      | 0.053115005  | 1.404258615  | 0.160687287 | 0.228304679 | no |
| LOC284232  | 0.053079102  | 1.40330672   | 0.160970722 | 0.228691311 | no |
| XRN1       | 0.053066993  | 1.40298569   | 0.161066396 | 0.228811158 | no |
| SLC6A4     | 0.053064413  | 1.402917297  | 0.161086785 | 0.228824043 | no |
| NUDT4      | -0.053052609 | -1.402604325 | 0.161180108 | 0.228940525 | no |
| DIRC3      | 0.053039751  | 1.402263433  | 0.161281803 | 0.22906888  | no |
| NMUR2      | -0.05303337  | -1.402094247 | 0.161332293 | 0.229124495 | no |
| VTCN1      | -0.05301961  | -1.401729444 | 0.161441201 | 0.229263062 | no |
| SGOL1      | 0.052980795  | 1.400700359  | 0.161748723 | 0.229672881 | no |
| CDK2AP1    | -0.052980318 | -1.400687713 | 0.161752505 | 0.229672881 | no |
| OR13F1     | 0.052964553  | 1.400269747  | 0.161877535 | 0.22983427  | no |
| NCRNA00116 | 0.052958077  | 1.400098059  | 0.161928915 | 0.229891075 | no |
| OR8B2      | -0.052954081 | -1.399992124 | 0.161960623 | 0.229919947 | no |
| ELP4       | -0.052933168 | -1.399437666 | 0.16212666  | 0.230139494 | no |
| ATL2       | 0.05290024   | 1.398564679  | 0.162388344 | 0.230494773 | no |
| MTERF      | 0.052888483  | 1.398252987  | 0.162481853 | 0.23061131  | no |
| ATXN1L     | -0.052878545 | -1.397989501 | 0.162560932 | 0.230707352 | no |
| MTG1       | -0.052871937 | -1.397814311 | 0.162613528 | 0.230755763 | no |
| TTK        | 0.052871391  | 1.397799845  | 0.162617871 | 0.230755763 | no |
| PLAC4      | 0.052853861  | 1.39733508   | 0.162757467 | 0.230937642 | no |
| HCG9       | 0.05284841   | 1.397190576  | 0.162800888 | 0.230983043 | no |
| GSTM1      | 0.052842091  | 1.397023035  | 0.162851243 | 0.231038273 | no |
| STAG3L4    | 0.052839323  | 1.396949664  | 0.162873298 | 0.23105335  | no |
| NPFFR1     | 0.052836516  | 1.396875248  | 0.16289567  | 0.231068874 | no |
| ACAP2      | 0.052828502  | 1.39666277   | 0.16295956  | 0.231143286 | no |
| PLG        | -0.052826246 | -1.39660296  | 0.162977549 | 0.231152583 | no |
| KCTD18     | -0.052823028 | -1.396517659 | 0.163003205 | 0.231172756 | no |
| LOC441046  | 0.05281284   | 1.39624756   | 0.163084466 | 0.231271777 | no |
| FAM24B     | -0.052804976 | -1.396039053 | 0.163147217 | 0.231342794 | no |
| MEPE       | -0.052803696 | -1.396005127 | 0.163157429 | 0.231342794 | no |
| G2E3       | -0.052796754 | -1.395821086 | 0.163212835 | 0.231397688 | no |
| FHL5       | 0.052795978  | 1.395800498  | 0.163219034 | 0.231397688 | no |
| NBPF10     | -0.052787818 | -1.395584186 | 0.163284175 | 0.231473808 | no |
| TOM1       | -0.052760692 | -1.394865035 | 0.163500884 | 0.231764768 | no |
| PRKD1      | -0.05275272  | -1.394653677 | 0.163564617 | 0.231838854 | no |
| SRY        | 0.052744061  | 1.394424118  | 0.163633858 | 0.231920739 | no |
| MST1P2     | -0.052717502 | -1.393720016 | 0.163846374 | 0.232205662 | no |
| ARL8B      | 0.052696719  | 1.39316903   | 0.16401282  | 0.232425261 | no |
| EVX2       | -0.052690727 | -1.393010162 | 0.164060836 | 0.23247701  | no |
| ARMC1      | -0.052680516 | -1.392739463 | 0.164142676 | 0.232576678 | no |
| C1orf187   | 0.052678721  | 1.39269189   | 0.164157062 | 0.232580762 | no |
| MED19      | -0.052672789 | -1.392534605 | 0.164204631 | 0.232631857 | no |
| SPDYE8P    | 0.052665116  | 1.392331186  | 0.164266168 | 0.232702732 | no |
| RNF152     | 0.052658488  | 1.392155484  | 0.164319334 | 0.232761739 | no |
| KRT6C      | -0.052634591 | -1.391521961 | 0.164511142 | 0.233017113 | no |
| TMEM106B   | -0.052613758 | -1.390969657 | 0.164678498 | 0.233230297 | no |
| ADAD2      | -0.052612984 | -1.390949123 | 0.164684722 | 0.233230297 | no |
| LOC348021  | -0.05260821  | -1.390822567 | 0.16472309  | 0.233263916 | no |
| SNORA57    | 0.052607159  | 1.390794709  | 0.164731536 | 0.233263916 | no |
| IKBK       | 0.05259801   | 1.390552146  | 0.164805095 | 0.233351733 | no |

|              |              |              |             |             |    |
|--------------|--------------|--------------|-------------|-------------|----|
| SLC16A2      | -0.052562046 | -1.389598719 | 0.165094466 | 0.233745092 | no |
| IGLL3        | -0.052556028 | -1.389439187 | 0.165142922 | 0.233797325 | no |
| SCLY         | 0.05254221   | 1.389072874  | 0.165254227 | 0.233938521 | no |
| HELLS        | 0.052513316  | 1.388306868  | 0.165487162 | 0.234245499 | no |
| MDS2         | 0.052512437  | 1.388283579  | 0.165494248 | 0.234245499 | no |
| CBY1         | 0.052484688  | 1.387547938  | 0.16571819  | 0.234546052 | no |
| ZNF443       | -0.052462872 | -1.386969583 | 0.165894411 | 0.234779029 | no |
| LOC100128675 | 0.052441538  | 1.386404036  | 0.166066867 | 0.235006643 | no |
| MED17        | -0.052422085 | -1.385888338 | 0.166224239 | 0.235212883 | no |
| ZNF83        | 0.052418531  | 1.385794108  | 0.166253007 | 0.235237126 | no |
| TOR2A        | 0.052414326  | 1.385682628  | 0.166287046 | 0.235268824 | no |
| CSPG4        | -0.052400449 | -1.385314767 | 0.166399405 | 0.235411319 | no |
| GBA3         | 0.052383084  | 1.384854407  | 0.166540097 | 0.235593876 | no |
| C17orf53     | 0.05236878   | 1.384475213  | 0.16665605  | 0.235741414 | no |
| ZDHHC15      | 0.052367022  | 1.384428611  | 0.166670305 | 0.235745084 | no |
| SOD1         | -0.052360405 | -1.384253209 | 0.166723965 | 0.235804486 | no |
| PROKR1       | 0.052358223  | 1.384195368  | 0.166741663 | 0.235813021 | no |
| DPY19L2P4    | -0.05233095  | -1.383472354 | 0.166963008 | 0.23610954  | no |
| GLRA2        | -0.052328976 | -1.383420025 | 0.166979037 | 0.236115692 | no |
| OR4Q3        | -0.052313312 | -1.383004774 | 0.167106272 | 0.236279082 | no |
| DNM1P35      | 0.052309463  | 1.382902765  | 0.167137539 | 0.236306767 | no |
| MGC34034     | 0.052281076  | 1.382150217  | 0.167368342 | 0.236616539 | no |
| PRC1         | 0.052270994  | 1.381882969  | 0.167450363 | 0.236715945 | no |
| GNGT1        | 0.05226002   | 1.381592058  | 0.167539681 | 0.23682565  | no |
| CITED1       | 0.052253825  | 1.381427816  | 0.167590124 | 0.236880392 | no |
| PCDHGA6      | -0.052238701 | -1.381026885 | 0.167713308 | 0.237021958 | no |
| RNF138       | 0.052238601  | 1.381024257  | 0.167714116 | 0.237021958 | no |
| OFD1         | -0.05223721  | -1.380987379 | 0.16772545  | 0.237021958 | no |
| EIF5A        | 0.052234779  | 1.380922941  | 0.167745256 | 0.237033379 | no |
| C12orf71     | -0.05223148  | -1.380835466 | 0.167772145 | 0.237054807 | no |
| KRTAP8-1     | -0.05221448  | -1.380384826 | 0.16791072  | 0.237234028 | no |
| PTN          | 0.052212366  | 1.380328771  | 0.167927964 | 0.237241812 | no |
| KIAA1958     | -0.052195009 | -1.379868654 | 0.168069553 | 0.237425252 | no |
| HIST1H1T     | 0.052190739  | 1.37975548   | 0.168104393 | 0.23744525  | no |
| SNORA63      | 0.052190396  | 1.37974637   | 0.168107197 | 0.23744525  | no |
| AUH          | 0.052185774  | 1.37962384   | 0.168144924 | 0.237481947 | no |
| SORBS2       | -0.052167651 | -1.379143438 | 0.168292901 | 0.237674342 | no |
| MYNN         | 0.052162749  | 1.379013488  | 0.168332946 | 0.237714291 | no |
| PMS2L5       | -0.05216044  | -1.378952261 | 0.168351816 | 0.237724334 | no |
| GLI2         | 0.052119865  | 1.377876679  | 0.168683567 | 0.238169671 | no |
| RNF26        | 0.052117983  | 1.377826797  | 0.168698965 | 0.238169671 | no |
| PWWP2B       | -0.052117547 | -1.377815231 | 0.168702535 | 0.238169671 | no |
| TBC1D21      | -0.05211529  | -1.377755394 | 0.168721007 | 0.238179118 | no |
| SNORA40      | 0.05210511   | 1.37748555   | 0.168804329 | 0.238280103 | no |
| PIWIL3       | -0.052096397 | -1.377254583 | 0.16887567  | 0.238364165 | no |
| MEA1         | 0.05209185   | 1.377134046  | 0.168912911 | 0.238400086 | no |
| MAPKSP1      | 0.052085434  | 1.376963967  | 0.168965469 | 0.238457619 | no |
| TRPC7        | 0.052078183  | 1.376771737  | 0.169024886 | 0.238524824 | no |
| TMEM42       | 0.052066682  | 1.376466881  | 0.169119148 | 0.238641188 | no |
| PPAPDC1B     | 0.05205195   | 1.37607636   | 0.169239955 | 0.23879499  | no |
| PTMS         | -0.052041602 | -1.375802039 | 0.169324855 | 0.238898111 | no |

|           |              |              |             |             |    |
|-----------|--------------|--------------|-------------|-------------|----|
| HIST2H2AC | 0.052003186  | 1.374783691  | 0.169640304 | 0.239326472 | no |
| GLE1      | 0.051996449  | 1.374605112  | 0.169695667 | 0.239387874 | no |
| ZNF542    | 0.051964488  | 1.373757887  | 0.169958509 | 0.239741934 | no |
| PAQR4     | -0.051961904 | -1.373689386 | 0.169979774 | 0.239755203 | no |
| DBNDD1    | 0.05195596   | 1.373531818  | 0.170028697 | 0.239807477 | no |
| OR52I2    | 0.051916936  | 1.372497376  | 0.170350135 | 0.240228984 | no |
| TSN       | -0.051916792 | -1.37249357  | 0.170351318 | 0.240228984 | no |
| EIF1      | 0.051908942  | 1.372285467  | 0.170416039 | 0.240303492 | no |
| TDRD9     | -0.051901607 | -1.372091045 | 0.170476521 | 0.240343707 | no |
| FOSB      | 0.051901488  | 1.372087885  | 0.170477504 | 0.240343707 | no |
| CHRNA1    | 0.051901158  | 1.372079152  | 0.170480221 | 0.240343707 | no |
| TPD52     | 0.051898756  | 1.372015459  | 0.170500039 | 0.240354887 | no |
| RBM39     | -0.051894529 | -1.371903435 | 0.170534899 | 0.240373564 | no |
| PTGFR     | 0.051894267  | 1.371896472  | 0.170537066 | 0.240373564 | no |
| GRAMD1A   | 0.051884023  | 1.371624942  | 0.170621585 | 0.24046432  | no |
| FANCI     | 0.05188358   | 1.371613199  | 0.170625241 | 0.24046432  | no |
| FAM26D    | 0.051864578  | 1.371109492  | 0.170782116 | 0.240668629 | no |
| PHF23     | 0.051852735  | 1.370795549  | 0.170879945 | 0.24077407  | no |
| C20orf186 | 0.051852636  | 1.370792947  | 0.170880757 | 0.24077407  | no |
| NLRP9     | 0.0518417    | 1.37050306   | 0.170971127 | 0.240884617 | no |
| SLC6A2    | 0.051821394  | 1.369964783  | 0.171139028 | 0.241104373 | no |
| CT45A3    | -0.051773275 | -1.368689268 | 0.171537382 | 0.241648745 | no |
| MCCD1     | -0.051766466 | -1.36850878  | 0.171593806 | 0.241711389 | no |
| C11orf61  | -0.051761938 | -1.368388762 | 0.171631334 | 0.241747409 | no |
| SNORA41   | 0.051759547  | 1.368325376  | 0.171651156 | 0.241758487 | no |
| ASAP1     | 0.051754058  | 1.36817989   | 0.171696659 | 0.24180573  | no |
| OR2M2     | -0.051750823 | -1.368094141 | 0.171723483 | 0.241826662 | no |
| PRG1      | -0.051734965 | -1.367673791 | 0.171855022 | 0.241995043 | no |
| NDUFS3    | -0.051733062 | -1.367623347 | 0.171870812 | 0.242000423 | no |
| MAP2K6    | 0.051703603  | 1.366842474  | 0.172115384 | 0.242327914 | no |
| ASB5      | 0.051701318  | 1.366781898  | 0.172134368 | 0.242337766 | no |
| MEN1      | -0.051687325 | -1.366410982 | 0.172250641 | 0.242481522 | no |
| TSPY1     | -0.051686053 | -1.366377286 | 0.172261207 | 0.242481522 | no |
| NT5E      | 0.051683576  | 1.366311618  | 0.172281799 | 0.242481522 | no |
| KRTAP5-11 | -0.051683257 | -1.366303157 | 0.172284453 | 0.242481522 | no |
| FSCB      | -0.051679105 | -1.366193109 | 0.172318967 | 0.242497402 | no |
| OR10A3    | 0.051679014  | 1.366190696  | 0.172319723 | 0.242497402 | no |
| FAM99B    | 0.051663396  | 1.365776713  | 0.172449606 | 0.242663288 | no |
| OR51B6    | 0.051645379  | 1.365299136  | 0.172599531 | 0.242857354 | no |
| ZNF354A   | 0.051640934  | 1.36518133   | 0.172636529 | 0.242892508 | no |
| SLC9A4    | 0.051618878  | 1.364596681  | 0.17282023  | 0.243134048 | no |
| KLHL36    | 0.051608136  | 1.364311945  | 0.172909749 | 0.24323999  | no |
| ZDHHC2    | 0.051606954  | 1.364280633  | 0.172919595 | 0.24323999  | no |
| SMEK3P    | -0.051590475 | -1.363843828 | 0.173056997 | 0.243416333 | no |
| LOC148189 | -0.051578655 | -1.363530521 | 0.173155602 | 0.243538084 | no |
| ITPR2     | 0.051573813  | 1.363402158  | 0.173196012 | 0.243577976 | no |
| KCNG1     | 0.051558007  | 1.362983205  | 0.173327955 | 0.243746581 | no |
| TIAM2     | -0.051547712 | -1.362710326 | 0.173413934 | 0.24385053  | no |
| DCTN3     | -0.051540219 | -1.362511726 | 0.17347653  | 0.243921586 | no |
| ARHGAP23  | -0.051483764 | -1.361015307 | 0.173948721 | 0.244568514 | no |
| B3GAT3    | 0.051460627  | 1.360402048  | 0.17414251  | 0.244823954 | no |

|            |              |              |             |             |    |
|------------|--------------|--------------|-------------|-------------|----|
| OPTC       | -0.051454097 | -1.360228942 | 0.174197241 | 0.244869274 | no |
| IFNA10     | 0.05145389   | 1.360223476  | 0.174198969 | 0.244869274 | no |
| HSPB3      | -0.051428588 | -1.359552806 | 0.174411138 | 0.245150472 | no |
| PRDM7      | 0.05142246   | 1.35939039   | 0.174462547 | 0.245205685 | no |
| TRIML2     | 0.051412411  | 1.359124038  | 0.174546881 | 0.245307163 | no |
| C20orf103  | -0.05139739  | -1.3587259   | 0.174672998 | 0.245467343 | no |
| LMBRD2     | -0.051350317 | -1.357478189 | 0.175068672 | 0.246006284 | no |
| ECT2L      | -0.051334861 | -1.357068506 | 0.175198737 | 0.246171941 | no |
| LOC146481  | -0.051331945 | -1.356991236 | 0.175223277 | 0.246189313 | no |
| DHRS2      | -0.051315717 | -1.356561094 | 0.175359929 | 0.246364189 | no |
| POU3F1     | 0.051301115  | 1.35617406   | 0.175482954 | 0.246519897 | no |
| DRD2       | -0.05129146  | -1.355918154 | 0.175564334 | 0.246608517 | no |
| PRSS16     | 0.051290736  | 1.355898981  | 0.175570432 | 0.246608517 | no |
| AIF1L      | -0.051287944 | -1.355824979 | 0.175593971 | 0.246624446 | no |
| BBC3       | 0.051274234  | 1.355461579  | 0.175709597 | 0.246769702 | no |
| KIFC3      | 0.051268016  | 1.355296775  | 0.175762053 | 0.246826226 | no |
| C17orf49   | 0.051262742  | 1.355156974  | 0.175806559 | 0.246861507 | no |
| SDHAP2     | -0.051262145 | -1.355141156 | 0.175811596 | 0.246861507 | no |
| ZIC4       | 0.051255103  | 1.354954519  | 0.175871028 | 0.246927808 | no |
| XP06       | -0.051234776 | -1.354415741 | 0.176042678 | 0.247151647 | no |
| FXC1       | 0.051224805  | 1.35415145   | 0.176126925 | 0.247252754 | no |
| VWA5B1     | 0.051211023  | 1.353786166  | 0.176243414 | 0.247399107 | no |
| NCRNA00183 | 0.051195313  | 1.353369788  | 0.176376267 | 0.24756841  | no |
| SV2C       | -0.051182182 | -1.353021737 | 0.176487377 | 0.247707171 | no |
| CRCT1      | -0.051171705 | -1.352744055 | 0.176576606 | 0.247814437 | no |
| C6orf89    | -0.051148374 | -1.352125668 | 0.176773674 | 0.248074556 | no |
| STK11IP    | 0.051130815  | 1.351660283  | 0.176922502 | 0.248264257 | no |
| SPRR1B     | -0.051129357 | -1.351621628 | 0.176934868 | 0.248264257 | no |
| QRFPR      | -0.051127663 | -1.35157672  | 0.176949235 | 0.248264257 | no |
| TRY6       | 0.051126633  | 1.351549423  | 0.176957968 | 0.248264257 | no |
| TMEM65     | -0.051097196 | -1.350769219 | 0.177207722 | 0.2485974   | no |
| CCDC113    | -0.051078151 | -1.350264444 | 0.177369447 | 0.248795314 | no |
| ZNF674     | -0.051077684 | -1.350252072 | 0.177373413 | 0.248795314 | no |
| SESN3      | 0.051063238  | 1.349869188  | 0.17749616  | 0.248950217 | no |
| SNAPC1     | 0.051053799  | 1.349619011  | 0.177576399 | 0.249045479 | no |
| NAV3       | -0.051035355 | -1.349130148 | 0.177733267 | 0.249248193 | no |
| FSD2       | 0.051023413  | 1.348813633  | 0.177834887 | 0.249373405 | no |
| UQCRFS1    | 0.051018461  | 1.348682394  | 0.177877035 | 0.249415209 | no |
| ERF        | 0.051015139  | 1.348594356  | 0.177905313 | 0.249437561 | no |
| CTAGE5     | 0.050999719  | 1.348185663  | 0.178036631 | 0.249604369 | no |
| LOC728323  | -0.050994543 | -1.348048459 | 0.178080732 | 0.249633419 | no |
| LRFN3      | -0.050994388 | -1.348044373 | 0.178082046 | 0.249633419 | no |
| NR3C1      | -0.05095801  | -1.347080207 | 0.178392188 | 0.250050836 | no |
| CUL4B      | 0.050945268  | 1.346742498  | 0.178500914 | 0.25018589  | no |
| MED14      | 0.050940395  | 1.34661334   | 0.178542509 | 0.25022064  | no |
| NCRNA00051 | -0.050939464 | -1.34658866  | 0.178550458 | 0.25022064  | no |
| C7orf36    | 0.050927886  | 1.346281796  | 0.178649317 | 0.250341828 | no |
| UBE4B      | -0.050921782 | -1.346120027 | 0.178701448 | 0.250397524 | no |
| BOLA2      | 0.050902819  | 1.34561743   | 0.178863487 | 0.250607206 | no |
| REN        | -0.050900401 | -1.345553346 | 0.178884155 | 0.250618797 | no |
| MEF2D      | -0.050896158 | -1.34544088  | 0.178920433 | 0.250652253 | no |

|          |              |              |             |             |    |
|----------|--------------|--------------|-------------|-------------|----|
| NEUROG3  | -0.050891216 | -1.345309904 | 0.178962688 | 0.250694078 | no |
| CT45A5   | -0.050883914 | -1.345116363 | 0.179025141 | 0.250763715 | no |
| TTC21A   | -0.050882503 | -1.345078981 | 0.179037206 | 0.250763715 | no |
| FAM173A  | -0.050880536 | -1.345026836 | 0.179054036 | 0.250769915 | no |
| PBRM1    | -0.050878846 | -1.344982045 | 0.179068493 | 0.250772792 | no |
| OR13C9   | -0.050875258 | -1.34488695  | 0.179099191 | 0.250798409 | no |
| COX19    | 0.050848751  | 1.344184419  | 0.179326095 | 0.251098759 | no |
| PAGE2B   | -0.050844987 | -1.344084673 | 0.179358328 | 0.251126501 | no |
| KRT40    | -0.050840429 | -1.343963877 | 0.17939737  | 0.251163771 | no |
| ZNF77    | -0.050829144 | -1.343664791 | 0.179494062 | 0.251281744 | no |
| SOX17    | 0.050815826  | 1.343311804  | 0.179608231 | 0.251424164 | no |
| PRKCQ    | -0.050809927 | -1.343155471 | 0.179658811 | 0.251477558 | no |
| MAN2A2   | -0.050803155 | -1.342975993 | 0.179716894 | 0.251541444 | no |
| CALML3   | -0.050769575 | -1.342086004 | 0.180005117 | 0.251927417 | no |
| TUBB1    | -0.050759157 | -1.341809903 | 0.180094603 | 0.252019505 | no |
| CCL3     | 0.050759013  | 1.341806068  | 0.180095846 | 0.252019505 | no |
| MYLK2    | -0.050741314 | -1.341337003 | 0.180247948 | 0.252214895 | no |
| NFKBIB   | 0.050738664  | 1.341266762  | 0.180270733 | 0.252229321 | no |
| CLDN15   | -0.050710396 | -1.340517577 | 0.180513891 | 0.252552062 | no |
| C2orf34  | 0.050704336  | 1.340356974  | 0.180566048 | 0.252600641 | no |
| C5orf48  | -0.050702781 | -1.340315751 | 0.180579438 | 0.252600641 | no |
| LMNB1    | 0.05070147   | 1.340281002  | 0.180590725 | 0.252600641 | no |
| BZW2     | 0.050700556  | 1.340256793  | 0.180598589 | 0.252600641 | no |
| C21orf54 | -0.050688309 | -1.339932198 | 0.180704053 | 0.252730668 | no |
| YWHAG    | -0.05066618  | -1.339345737 | 0.180894716 | 0.252979827 | no |
| NUDT17   | -0.050657767 | -1.339122769 | 0.180967244 | 0.253063753 | no |
| SIK1     | 0.050652168  | 1.338974383  | 0.181015523 | 0.25311376  | no |
| NUDT12   | -0.050650578 | -1.338932236 | 0.181029238 | 0.253115431 | no |
| MDGA1    | -0.050647348 | -1.338846631 | 0.181057097 | 0.253136877 | no |
| SCRN1    | -0.050638952 | -1.338624114 | 0.181129526 | 0.253220631 | no |
| RGP1     | 0.050619871  | 1.338118432  | 0.181294206 | 0.253433331 | no |
| PHIP     | -0.050614587 | -1.337978368 | 0.181339839 | 0.253479596 | no |
| SNORA55  | 0.050603989  | 1.337697504  | 0.18143137  | 0.253590007 | no |
| DNAJC28  | -0.050597267 | -1.337519354 | 0.181489446 | 0.253653644 | no |
| KRT85    | 0.050587485  | 1.337260108  | 0.181573983 | 0.253754253 | no |
| HHIPL1   | -0.050581961 | -1.337113699 | 0.181621738 | 0.253803448 | no |
| EDN1     | -0.050557095 | -1.336454693 | 0.181836805 | 0.254086427 | no |
| GLIS1    | -0.050531721 | -1.335782243 | 0.182056454 | 0.254372099 | no |
| SORCS1   | -0.050530572 | -1.335751784 | 0.182066408 | 0.254372099 | no |
| C22orf33 | -0.050528015 | -1.335684017 | 0.182088555 | 0.254385462 | no |
| HAPLN2   | -0.050496661 | -1.334853071 | 0.182360284 | 0.254732734 | no |
| CROCC    | -0.050495203 | -1.334814433 | 0.182372927 | 0.254732734 | no |
| FAM189B  | 0.050494972  | 1.334808311  | 0.18237493  | 0.254732734 | no |
| FANCC    | 0.050493138  | 1.334759697  | 0.182390837 | 0.254737355 | no |
| VPS37C   | 0.050486727  | 1.33458981   | 0.182446436 | 0.254797406 | no |
| D4S234E  | -0.050463092 | -1.33396342  | 0.182651544 | 0.255066233 | no |
| FAM47C   | 0.050441082  | 1.333380129  | 0.182842693 | 0.255315531 | no |
| NCAPG2   | 0.05043748   | 1.33328466   | 0.182873993 | 0.255334797 | no |
| DDX12    | -0.050436588 | -1.333261008 | 0.182881749 | 0.255334797 | no |
| SNORA54  | 0.050434495  | 1.333205555  | 0.182899932 | 0.255342551 | no |
| CD38     | -0.050432851 | -1.333161983 | 0.18291422  | 0.255344866 | no |

|              |              |              |             |             |    |
|--------------|--------------|--------------|-------------|-------------|----|
| MOCS2        | -0.050422912 | -1.332898587 | 0.183000611 | 0.255447828 | no |
| SCARNA22     | 0.050414307  | 1.332670544  | 0.183075431 | 0.255534626 | no |
| ALDH1A1      | 0.050397029  | 1.332212626  | 0.18322574  | 0.255726771 | no |
| PON2         | -0.050378667 | -1.331726019 | 0.183385567 | 0.255932173 | no |
| HSD17B14     | -0.050367415 | -1.331427819 | 0.183483562 | 0.256051261 | no |
| ARTN         | 0.050360672  | 1.331249126  | 0.183542304 | 0.256115556 | no |
| C18orf21     | 0.050344486  | 1.330820153  | 0.183683376 | 0.25629472  | no |
| PITX3        | -0.050326494 | -1.330343365 | 0.183840267 | 0.25649593  | no |
| CCDC17       | -0.050317888 | -1.330115275 | 0.183915357 | 0.25658299  | no |
| SNRPA        | -0.050289038 | -1.329350733 | 0.18416722  | 0.256916639 | no |
| GUCY1B3      | -0.05026721  | -1.328772263 | 0.184357955 | 0.257164974 | no |
| PIK3C2A      | -0.050242231 | -1.328110278 | 0.184576407 | 0.257451935 | no |
| XKR3         | 0.050204439  | 1.32710875   | 0.184907271 | 0.257895641 | no |
| PEX19        | -0.050198456 | -1.326950197 | 0.184959691 | 0.257950958 | no |
| KLHDC9       | 0.050196669  | 1.326902848  | 0.184975347 | 0.257954999 | no |
| GNB2L1       | -0.05019434  | -1.326841127 | 0.184995757 | 0.257965668 | no |
| PCDHA11      | -0.050183287 | -1.326548218 | 0.18509264  | 0.258082966 | no |
| GART         | 0.050181321  | 1.326496117  | 0.185109877 | 0.2580892   | no |
| GYPA         | -0.050159933 | -1.325929309 | 0.185297475 | 0.258323356 | no |
| TOMM20L      | 0.05015926   | 1.325911487  | 0.185303375 | 0.258323356 | no |
| CHRNA7       | -0.050150454 | -1.325678117 | 0.185380657 | 0.258413274 | no |
| KRT35        | -0.05014508  | -1.325535696 | 0.185427832 | 0.258461214 | no |
| ANP32B       | -0.050138381 | -1.32535816  | 0.185486651 | 0.258525376 | no |
| ZNF239       | -0.05010947  | -1.324592009 | 0.185740641 | 0.258861535 | no |
| LOC283999    | -0.050082593 | -1.32387975  | 0.185976997 | 0.259168221 | no |
| IBTK         | -0.050081531 | -1.323851623 | 0.185986335 | 0.259168221 | no |
| ANP32C       | -0.050078554 | -1.323772725 | 0.186012531 | 0.259186861 | no |
| PRDXDD1P     | 0.050055127  | 1.323151902  | 0.186218755 | 0.259456329 | no |
| PLXNA4       | -0.050036989 | -1.322671234 | 0.186378539 | 0.25966106  | no |
| OR6T1        | -0.050032108 | -1.322541889 | 0.186421553 | 0.259703091 | no |
| E2F5         | -0.05002738  | -1.322416594 | 0.186463227 | 0.25974325  | no |
| VHL          | -0.050005926 | -1.321848078 | 0.186652408 | 0.259988866 | no |
| TIAM1        | -0.049988219 | -1.321378828 | 0.186808664 | 0.26018859  | no |
| SLC27A1      | 0.049985952  | 1.321318742  | 0.186828679 | 0.260198543 | no |
| CIC          | -0.049974182 | -1.321006838 | 0.186932603 | 0.260325345 | no |
| LOC100126784 | 0.049967656  | 1.32083391   | 0.186990239 | 0.260387675 | no |
| ZNF470       | 0.049966035  | 1.320790961  | 0.187004556 | 0.260389677 | no |
| ROM1         | 0.049961994  | 1.320683879  | 0.187040254 | 0.260421449 | no |
| C9orf91      | -0.04993102  | -1.319863065 | 0.187314061 | 0.260784719 | no |
| SLC17A1      | 0.049925566  | 1.319718519  | 0.18736231  | 0.260833931 | no |
| ANKRD26P1    | 0.049892103  | 1.318831767  | 0.187658502 | 0.261212544 | no |
| MTMR12       | 0.049891921  | 1.318826943  | 0.187660115 | 0.261212544 | no |
| SFRS11       | 0.04987411   | 1.318354966  | 0.187817906 | 0.261414184 | no |
| CHUK         | 0.049835909  | 1.317342656  | 0.188156674 | 0.261867669 | no |
| ASB18        | -0.049793714 | -1.316224529 | 0.188531377 | 0.262371102 | no |
| PPARGC1B     | 0.049791981  | 1.316178597  | 0.188546781 | 0.26237448  | no |
| IDUA         | 0.04975871   | 1.315296945  | 0.188842644 | 0.262768106 | no |
| BAAT         | -0.049753038 | -1.315146636 | 0.188893119 | 0.262820252 | no |
| FAM119A      | 0.049746027  | 1.314960864  | 0.188955516 | 0.262888978 | no |
| HYI          | -0.049738609 | -1.314764289 | 0.189021558 | 0.262962765 | no |
| C9orf23      | -0.049734704 | -1.314660801 | 0.189056334 | 0.262993048 | no |

|            |              |              |             |             |    |
|------------|--------------|--------------|-------------|-------------|----|
| EXOSC8     | -0.049729012 | -1.314509974 | 0.189107025 | 0.263033866 | no |
| TATDN3     | 0.049728488  | 1.314496076  | 0.189111696 | 0.263033866 | no |
| NCRNA00182 | -0.049710875 | -1.314029363 | 0.189268618 | 0.263234018 | no |
| ZNF92      | -0.049702437 | -1.313805753 | 0.189343837 | 0.263320518 | no |
| SNORA51    | 0.049680529  | 1.31322523   | 0.189539217 | 0.263574104 | no |
| CRK        | 0.049644929  | 1.312281857  | 0.189857035 | 0.263997905 | no |
| C6orf15    | 0.049629339  | 1.311868761  | 0.189996329 | 0.264173426 | no |
| USP51      | -0.049606835 | -1.311272434 | 0.190197541 | 0.264435008 | no |
| DBH        | -0.049603259 | -1.311177668 | 0.190229531 | 0.264461298 | no |
| SCARF2     | 0.049585162  | 1.310698127  | 0.190391471 | 0.264668232 | no |
| PRSS41     | -0.049579191 | -1.310539915 | 0.190444922 | 0.264724333 | no |
| AMBP       | 0.049577257  | 1.310488655  | 0.190462242 | 0.264730208 | no |
| LIP1       | -0.049566812 | -1.310211874 | 0.190555782 | 0.264842016 | no |
| TH         | 0.049556605  | 1.309941428  | 0.190647214 | 0.264948899 | no |
| ERCC2      | -0.049555302 | -1.309906886 | 0.190658894 | 0.264948899 | no |
| KLRG2      | 0.049547534  | 1.309701063  | 0.190728504 | 0.265027415 | no |
| TIMM22     | 0.049539658  | 1.309492355  | 0.190799108 | 0.265102098 | no |
| ZNF440     | -0.049538613 | -1.309464671 | 0.190808474 | 0.265102098 | no |
| C14orf43   | -0.049534962 | -1.309367914 | 0.190841214 | 0.265129367 | no |
| GNL3       | -0.04952022  | -1.308977285 | 0.190973434 | 0.265294825 | no |
| FAM22G     | 0.049510829  | 1.308728448  | 0.191057696 | 0.265393644 | no |
| GAR1       | 0.049508622  | 1.308669962  | 0.191077504 | 0.265402925 | no |
| FAM83F     | 0.049472532  | 1.307713634  | 0.191401617 | 0.265834848 | no |
| BTBD10     | 0.049460987  | 1.307407728  | 0.191505378 | 0.26596069  | no |
| SLC30A8    | 0.049448406  | 1.307074352  | 0.191618504 | 0.26609952  | no |
| ZIC2       | 0.049439055  | 1.306826557  | 0.191702621 | 0.266198049 | no |
| HHIP       | 0.049429481  | 1.306572877  | 0.191788764 | 0.266299378 | no |
| CENPO      | 0.049424999  | 1.306454113  | 0.191829104 | 0.266333779 | no |
| GAGE10     | -0.049423801 | -1.306422371 | 0.191839886 | 0.266333779 | no |
| ADAT2      | 0.049393907  | 1.305630241  | 0.19210911  | 0.266656732 | no |
| SLC38A3    | -0.049393631 | -1.305622921 | 0.192111599 | 0.266656732 | no |
| GP5        | 0.049393578  | 1.305621517  | 0.192112076 | 0.266656732 | no |
| PIK3R4     | -0.049390861 | -1.305549539 | 0.192136554 | 0.2666724   | no |
| ARID3C     | -0.049361276 | -1.304765599 | 0.192403296 | 0.267024289 | no |
| LOC654342  | 0.049356884  | 1.304649238  | 0.192442912 | 0.267050024 | no |
| FLJ12825   | 0.049356292  | 1.304633543  | 0.192448256 | 0.267050024 | no |
| C17orf99   | -0.04935118  | -1.304498097 | 0.192494378 | 0.267095693 | no |
| PMS2L4     | -0.049341921 | -1.304252755 | 0.192577943 | 0.267185479 | no |
| HEMGN      | 0.049339277  | 1.304182675  | 0.192601818 | 0.267185479 | no |
| SLC35A5    | 0.049338526  | 1.304162786  | 0.192608594 | 0.267185479 | no |
| GLB1L3     | -0.049338155 | -1.304152943 | 0.192611947 | 0.267185479 | no |
| XRCC5      | 0.049316403  | 1.303576571  | 0.192808394 | 0.267439634 | no |
| TMEM200A   | 0.049314802  | 1.303534149  | 0.192822858 | 0.267441349 | no |
| LYZL4      | -0.049309675 | -1.303398305 | 0.192869182 | 0.26748725  | no |
| FRG2C      | -0.049306465 | -1.303313245 | 0.192898193 | 0.267509134 | no |
| CPA6       | 0.049302114  | 1.303197965  | 0.192937515 | 0.267545314 | no |
| GLIPR1L2   | 0.049287457  | 1.302809583  | 0.193070037 | 0.267710719 | no |
| NT5DC1     | 0.049284379  | 1.302728044  | 0.193097867 | 0.267730948 | no |
| SMTNL1     | 0.049275436  | 1.302491057  | 0.193178772 | 0.267824756 | no |
| ETFB       | -0.049269294 | -1.302328316 | 0.193234345 | 0.267883433 | no |
| LOC723972  | -0.049252599 | -1.301885965 | 0.193385458 | 0.268074541 | no |

|              |              |              |             |             |    |
|--------------|--------------|--------------|-------------|-------------|----|
| NBR2         | -0.049249191 | -1.301795665 | 0.193416316 | 0.268098936 | no |
| LOC441454    | -0.049235586 | -1.301435158 | 0.193539549 | 0.268231093 | no |
| TRIM40       | -0.049235285 | -1.301427178 | 0.193542277 | 0.268231093 | no |
| WRB          | -0.049233382 | -1.301376752 | 0.193559519 | 0.268231093 | no |
| TMC3         | -0.049232807 | -1.301361522 | 0.193564727 | 0.268231093 | no |
| ZNF649       | -0.049220873 | -1.301045304 | 0.193672878 | 0.268362569 | no |
| ZNF385B      | -0.049216825 | -1.300938058 | 0.193709568 | 0.268395014 | no |
| PRKG1        | 0.049213864  | 1.300859592  | 0.193736415 | 0.268413817 | no |
| PITX2        | 0.049211065  | 1.300785421  | 0.193761795 | 0.268430586 | no |
| RBM12        | -0.04920834  | -1.300713219 | 0.193786504 | 0.268446422 | no |
| LOC100192378 | -0.049195703 | -1.30037837  | 0.193901125 | 0.268586801 | no |
| OR5H1        | 0.049190797  | 1.300248382  | 0.193945634 | 0.26863005  | no |
| OR2B3        | 0.04917793   | 1.29990744   | 0.194062412 | 0.268773383 | no |
| FAM71C       | -0.049176059 | -1.299857865 | 0.194079396 | 0.268778494 | no |
| NEDD4L       | -0.049174033 | -1.299804206 | 0.194097781 | 0.268785544 | no |
| SYT12        | -0.049172304 | -1.299758378 | 0.194113484 | 0.268788879 | no |
| OR2M5        | -0.049160849 | -1.299454855 | 0.194217509 | 0.268914505 | no |
| TMX2         | -0.049103398 | -1.297932593 | 0.194739845 | 0.269619269 | no |
| PTPN20B      | -0.049088713 | -1.297543501 | 0.19487352  | 0.269785869 | no |
| USP50        | 0.049081839  | 1.297361365  | 0.194936117 | 0.269854051 | no |
| HOXC9        | 0.049079251  | 1.297292781  | 0.194959692 | 0.269868209 | no |
| GDF7         | -0.049067315 | -1.296976536 | 0.195068425 | 0.270000234 | no |
| NSUN2        | 0.049059529  | 1.296770219  | 0.195139386 | 0.270079964 | no |
| C20orf43     | -0.04900202  | -1.295246459 | 0.195664059 | 0.270787593 | no |
| KRT6B        | -0.048996315 | -1.295095301 | 0.195716163 | 0.270841163 | no |
| SPDYE5       | -0.048994269 | -1.295041098 | 0.19573485  | 0.270848483 | no |
| ARL13A       | 0.048945507  | 1.293749094  | 0.196180652 | 0.271415605 | no |
| TMEM120B     | -0.048945263 | -1.293742609 | 0.196182891 | 0.271415605 | no |
| RPGRIP1L     | 0.04894399   | 1.293708894  | 0.196194534 | 0.271415605 | no |
| PYGM         | 0.048943569  | 1.293697727  | 0.196198391 | 0.271415605 | no |
| ARHGFE6      | -0.048922368 | -1.293135998 | 0.196392459 | 0.271665486 | no |
| HSD17B12     | -0.048919703 | -1.293065398 | 0.19641686  | 0.271680651 | no |
| TMEM215      | -0.048897594 | -1.292479594 | 0.196619415 | 0.271942217 | no |
| ARHGFE38     | 0.048893015  | 1.292358277  | 0.196661382 | 0.271981655 | no |
| XKR5         | -0.04888717  | -1.292203389 | 0.196714971 | 0.272022209 | no |
| TTL10        | 0.048886881  | 1.292195754  | 0.196717614 | 0.272022209 | no |
| C6orf217     | 0.048864872  | 1.291612605  | 0.196919476 | 0.272282722 | no |
| RPL26L1      | 0.048857911  | 1.291428165  | 0.196983353 | 0.27235242  | no |
| PGF          | -0.048844733 | -1.291079005 | 0.19710432  | 0.272501035 | no |
| ACSM1        | 0.048841877  | 1.291003323  | 0.197130547 | 0.272518659 | no |
| DHCR24       | 0.048829155  | 1.290666253  | 0.197247388 | 0.27266154  | no |
| ZNF280C      | -0.048809499 | -1.290145468 | 0.197428011 | 0.272892564 | no |
| KPNA1        | 0.048790734  | 1.289648283  | 0.197600562 | 0.27310652  | no |
| PRDM12       | -0.048789728 | -1.289621625 | 0.197609817 | 0.27310652  | no |
| PCGEM1       | 0.048763643  | 1.288930494  | 0.197849871 | 0.273419596 | no |
| TTC36        | -0.04875092  | -1.28859341  | 0.197967029 | 0.273562805 | no |
| ASNA1        | 0.048739191  | 1.288282634  | 0.198075089 | 0.273693422 | no |
| PCA3         | 0.048717606  | 1.287710741  | 0.198274054 | 0.273949622 | no |
| NOS1AP       | -0.048713258 | -1.28759555  | 0.198314147 | 0.273982467 | no |
| DCAF4L1      | 0.048712089  | 1.287564578  | 0.198324929 | 0.273982467 | no |
| WFDC5        | 0.048710421  | 1.287520386  | 0.198340312 | 0.273984998 | no |



|            |              |              |             |             |    |
|------------|--------------|--------------|-------------|-------------|----|
| C17orf81   | -0.048704464 | -1.287362536 | 0.198395269 | 0.274042191 | no |
| PDYN       | -0.048684093 | -1.286822809 | 0.198583262 | 0.274283125 | no |
| PWP2       | -0.048650543 | -1.285933914 | 0.198893159 | 0.274692389 | no |
| SIK2       | -0.048647986 | -1.285866165 | 0.198916792 | 0.274706264 | no |
| VGLL4      | 0.04864392   | 1.285758438  | 0.198954377 | 0.274739402 | no |
| NCRNA00105 | -0.048633981 | -1.285495103 | 0.199046273 | 0.27484753  | no |
| NPFFR2     | -0.048628084 | -1.285338864 | 0.19910081  | 0.274900199 | no |
| APOF       | 0.048626916  | 1.285307929  | 0.199111609 | 0.274900199 | no |
| ADARB1     | -0.048612879 | -1.284936025 | 0.199241476 | 0.275060714 | no |
| SLC41A1    | -0.048603184 | -1.284679152 | 0.199331211 | 0.275165808 | no |
| CALML4     | 0.048589034  | 1.284304249  | 0.199462231 | 0.275310437 | no |
| HBE1       | 0.048588927  | 1.284301434  | 0.199463215 | 0.275310437 | no |
| DEFA5      | -0.048581704 | -1.284110061 | 0.19953012  | 0.275383983 | no |
| PRR18      | -0.048574097 | -1.283908495 | 0.199600606 | 0.275462461 | no |
| C3orf26    | 0.048551358  | 1.283306062  | 0.199811382 | 0.275734525 | no |
| DPCD       | 0.048547763  | 1.283210796  | 0.199844728 | 0.275761719 | no |
| BEST1      | -0.048543507 | -1.283098053 | 0.199884197 | 0.275797358 | no |
| EME2       | -0.048516958 | -1.282394639 | 0.200130575 | 0.276106837 | no |
| IL1F7      | 0.048516394  | 1.282379715  | 0.200135804 | 0.276106837 | no |
| C20orf151  | -0.048514032 | -1.282317124 | 0.200157739 | 0.276118256 | no |
| MFAP3L     | 0.048478253  | 1.281369196  | 0.200490145 | 0.276532563 | no |
| PHLDB3     | 0.0484773    | 1.281343946  | 0.200499005 | 0.276532563 | no |
| TCEB3C     | 0.048477009  | 1.281336228  | 0.200501713 | 0.276532563 | no |
| HSN2       | -0.048475819 | -1.281304691 | 0.200512779 | 0.276532563 | no |
| RAD51AP2   | 0.048466397  | 1.281055083  | 0.200600383 | 0.276634509 | no |
| MUC4       | -0.04846207  | -1.280940429 | 0.200640631 | 0.276671142 | no |
| ARSH       | -0.048449285 | -1.280601713 | 0.200759571 | 0.276816272 | no |
| TIMM8A     | -0.048441928 | -1.280406781 | 0.200828044 | 0.276891803 | no |
| NLRP4      | 0.048385559  | 1.278913365  | 0.201353199 | 0.27759693  | no |
| KRT5       | -0.048382286 | -1.278826646 | 0.201383724 | 0.277620083 | no |
| CLCN3      | -0.048380022 | -1.278766653 | 0.201404844 | 0.277630267 | no |
| PPAPDC3    | -0.048371588 | -1.278543215 | 0.201483516 | 0.27771978  | no |
| VENTXP1    | 0.048355436  | 1.27811529   | 0.201634251 | 0.277901791 | no |
| C9orf103   | -0.048353541 | -1.278065083 | 0.201651941 | 0.277901791 | no |
| RBPJ       | -0.04835302  | -1.278051295 | 0.2016568   | 0.277901791 | no |
| MAGEE2     | -0.048343895 | -1.277809525 | 0.201742005 | 0.278000263 | no |
| ZIM3       | 0.048341815  | 1.277754415  | 0.201761431 | 0.278008084 | no |
| YIPF7      | -0.048305343 | -1.276788151 | 0.202102253 | 0.278458727 | no |
| OR7D4      | -0.048266783 | -1.275766556 | 0.202463049 | 0.278936826 | no |
| C14orf179  | 0.048262279  | 1.275647245  | 0.202505216 | 0.278975911 | no |
| ELSPBP1    | 0.048254992  | 1.275454196  | 0.202573458 | 0.279050908 | no |
| PRAMEF12   | 0.04823619   | 1.274956054  | 0.202749627 | 0.279274558 | no |
| SHROOM4    | 0.048234281  | 1.274905492  | 0.202767515 | 0.27928017  | no |
| SSNA1      | 0.048225635  | 1.27467643   | 0.202848566 | 0.279372773 | no |
| POLR2J2    | -0.0482049   | -1.274127086 | 0.203043041 | 0.27961672  | no |
| CLC        | 0.048203801  | 1.27409797   | 0.203053352 | 0.27961672  | no |
| OR3A1      | 0.048195537  | 1.273879037  | 0.203130899 | 0.279704455 | no |
| FAM196A    | -0.048173384 | -1.273292134 | 0.203338886 | 0.279971779 | no |
| ALDH3A1    | 0.048166164  | 1.273100865  | 0.203406702 | 0.280046081 | no |
| PPAPDC1A   | -0.048155768 | -1.272825432 | 0.203504388 | 0.280161495 | no |
| PCDHB7     | 0.048143353  | 1.272496534  | 0.203621081 | 0.280303058 | no |

|              |              |              |             |             |    |
|--------------|--------------|--------------|-------------|-------------|----|
| WNT5B        | -0.048131195 | -1.272174424 | 0.203735412 | 0.280441351 | no |
| FRG2         | 0.04812526   | 1.272017187  | 0.20379124  | 0.280499101 | no |
| C11orf58     | 0.048115577  | 1.271760663  | 0.203882344 | 0.280605393 | no |
| PSMC3        | -0.048104418 | -1.271465046 | 0.203987368 | 0.280730829 | no |
| TBL1X        | 0.048089937  | 1.271081393  | 0.204123728 | 0.280899369 | no |
| WDR31        | -0.048069939 | -1.270551593 | 0.204312142 | 0.281125007 | no |
| NDUFB6       | 0.048069582  | 1.270542143  | 0.204315503 | 0.281125007 | no |
| LOC100132287 | -0.048053529 | -1.27011687  | 0.204466838 | 0.281314088 | no |
| TAL2         | -0.048044952 | -1.269889623 | 0.204547737 | 0.281406243 | no |
| CST5         | -0.048034382 | -1.269609601 | 0.204647457 | 0.281524276 | no |
| FBX030       | 0.048031238  | 1.269526312  | 0.204677124 | 0.28154593  | no |
| CCDC67       | 0.048009862  | 1.268960019  | 0.204878918 | 0.281804338 | no |
| LOC149620    | 0.048000954  | 1.26872403   | 0.204963054 | 0.281900886 | no |
| MRP63        | -0.047999402 | -1.268682911 | 0.204977716 | 0.281901875 | no |
| GPR146       | -0.047996702 | -1.268611369 | 0.205003229 | 0.281917785 | no |
| STIP1        | -0.047987964 | -1.268379884 | 0.205085795 | 0.282012147 | no |
| ODF3L2       | -0.047955014 | -1.267506971 | 0.205397363 | 0.282421375 | no |
| HAUS8        | 0.047944538  | 1.267229446  | 0.205496492 | 0.282538462 | no |
| C1orf163     | 0.047942227  | 1.267168225  | 0.205518365 | 0.28254932  | no |
| DEM1         | 0.047931699  | 1.266889314  | 0.205618032 | 0.282656792 | no |
| PRAMEF4      | 0.047931016  | 1.266871222  | 0.205624498 | 0.282656792 | no |
| LOC728554    | 0.047917746  | 1.266519674  | 0.205750174 | 0.282810322 | no |
| FAM49A       | -0.047903179 | -1.266133766 | 0.205888198 | 0.282980802 | no |
| LOC282997    | -0.047877402 | -1.26545088  | 0.206132605 | 0.283295945 | no |
| MID1         | 0.047876042  | 1.265414837  | 0.206145511 | 0.283295945 | no |
| RFPL1        | -0.047864809 | -1.265117265 | 0.206252084 | 0.283423138 | no |
| LIN37        | -0.047843907 | -1.264563537 | 0.206450503 | 0.283676517 | no |
| MSH2         | 0.047832815  | 1.264269686  | 0.206555856 | 0.283801991 | no |
| C19orf48     | 0.047824346  | 1.264045347  | 0.206636314 | 0.283893245 | no |
| ZNF805       | 0.047817861  | 1.263873533  | 0.206697949 | 0.283958628 | no |
| GTF2H1       | 0.047811655  | 1.263709124  | 0.206756941 | 0.284007164 | no |
| DBX2         | 0.047811188  | 1.263696771  | 0.206761373 | 0.284007164 | no |
| MEX3D        | 0.047802723  | 1.263472497  | 0.206841866 | 0.284098427 | no |
| PLAA         | 0.047781622  | 1.2629135    | 0.207042591 | 0.284354806 | no |
| ZDHHC14      | 0.047766364  | 1.262509308  | 0.207187816 | 0.284534932 | no |
| FSHB         | -0.047763253 | -1.262426898 | 0.207217435 | 0.28455628  | no |
| LOC285593    | 0.047760462  | 1.262352947  | 0.207244016 | 0.284573453 | no |
| C20orf202    | -0.047758069 | -1.262289568 | 0.207266799 | 0.284579122 | no |
| CCDC157      | -0.047757072 | -1.262263152 | 0.207276296 | 0.284579122 | no |
| DUPD1        | 0.047731203  | 1.261577838  | 0.207522774 | 0.284898176 | no |
| WDR3         | 0.047727167  | 1.26147093   | 0.207561243 | 0.284931642 | no |
| SPRR2E       | -0.047716306 | -1.26118321  | 0.207664801 | 0.285039551 | no |
| MUTYH        | 0.047715966  | 1.261174191  | 0.207668048 | 0.285039551 | no |
| CCT5         | 0.047713409  | 1.261106454  | 0.207692434 | 0.285053671 | no |
| LAMA5        | 0.047688364  | 1.26044298   | 0.207931402 | 0.285362279 | no |
| CABLES2      | -0.047684448 | -1.26033926  | 0.207968778 | 0.2853942   | no |
| FUNDC2P2     | -0.047672577 | -1.260024784 | 0.208082129 | 0.285526478 | no |
| CDS1         | 0.047671396  | 1.259993481  | 0.208093414 | 0.285526478 | no |
| ANAPC7       | 0.047648044  | 1.259374877  | 0.208316527 | 0.285813216 | no |
| RNGTT        | -0.047644455 | -1.259279792 | 0.208350837 | 0.285840892 | no |
| DUSP21       | 0.047618449  | 1.258590877  | 0.208599544 | 0.28616268  | no |

|          |              |              |             |             |    |
|----------|--------------|--------------|-------------|-------------|----|
| APOOL    | -0.047604211 | -1.258213697 | 0.208735801 | 0.286330174 | no |
| DUSP15   | 0.047592792  | 1.257911207  | 0.208845124 | 0.286460699 | no |
| DQX1     | -0.047581356 | -1.257608266 | 0.20895465  | 0.286591488 | no |
| BTBD3    | 0.047579713  | 1.257564742  | 0.20897039  | 0.286593633 | no |
| ZNF597   | 0.047563528  | 1.257135973  | 0.209125489 | 0.286786891 | no |
| MCEE     | 0.047558782  | 1.257010246  | 0.209170985 | 0.286829827 | no |
| PDP1     | -0.047544709 | -1.256637443 | 0.209305928 | 0.286995406 | no |
| LINGO2   | -0.047537521 | -1.256447044 | 0.209374872 | 0.28707047  | no |
| OR13C4   | -0.047534338 | -1.256362721 | 0.20940541  | 0.287092872 | no |
| ZWINT    | 0.047532255  | 1.256307546  | 0.209425394 | 0.287100801 | no |
| HOXA9    | 0.047514688  | 1.255842171  | 0.209594005 | 0.287312468 | no |
| MAGIX    | -0.047504339 | -1.255568031 | 0.209693375 | 0.287429197 | no |
| ARL6     | 0.04749342   | 1.255278788  | 0.209798257 | 0.287540778 | no |
| ANKS1A   | 0.04749289   | 1.255264735  | 0.209803353 | 0.287540778 | no |
| OXSM     | 0.047491423  | 1.255225883  | 0.209817445 | 0.287540778 | no |
| KRTAP4-8 | 0.047469186  | 1.254636817  | 0.210031176 | 0.287814174 | no |
| ZNRD1    | 0.047433596  | 1.253694047  | 0.210373571 | 0.288263834 | no |
| IFNA4    | 0.047390494  | 1.252552273  | 0.210788783 | 0.288813202 | no |
| CCL27    | 0.047381899  | 1.252324576  | 0.210871657 | 0.288907174 | no |
| C1orf189 | 0.047377312  | 1.252203076  | 0.210915888 | 0.288942371 | no |
| SNORA14B | 0.047376271  | 1.252175496  | 0.21092593  | 0.288942371 | no |
| ZNF433   | -0.047368522 | -1.251970221 | 0.211000677 | 0.289025183 | no |
| RPS10    | -0.047362107 | -1.251800305 | 0.211062564 | 0.289090368 | no |
| SNORA48  | 0.047357495  | 1.251678117  | 0.211107075 | 0.289131747 | no |
| C16orf70 | 0.047355299  | 1.25161994   | 0.21112827  | 0.289141189 | no |
| GATA4    | 0.04734851   | 1.251440114  | 0.211193795 | 0.289211335 | no |
| RPL19P12 | -0.04734185  | -1.251263677 | 0.2112581   | 0.289279801 | no |
| SNF8     | 0.047336917  | 1.251133011  | 0.211305732 | 0.289325429 | no |
| UBE2N    | 0.047313905  | 1.250523431  | 0.211528046 | 0.289603582 | no |
| STAMBPL1 | 0.047312924  | 1.250497447  | 0.211537526 | 0.289603582 | no |
| CCM2     | 0.047303081  | 1.250236701  | 0.211632675 | 0.289714227 | no |
| FBX033   | -0.04728055  | -1.249639873 | 0.21185058  | 0.289992893 | no |
| WRAP53   | -0.047266147 | -1.24925835  | 0.211989962 | 0.290164041 | no |
| DGUOK    | 0.047262802  | 1.249169733  | 0.212022345 | 0.29018872  | no |
| PPP2R5E  | -0.047250134 | -1.248834158 | 0.212145009 | 0.290336952 | no |
| DTL      | 0.047223201  | 1.248120733  | 0.21240596  | 0.290674408 | no |
| KRT24    | -0.047206863 | -1.24768796  | 0.212564369 | 0.2908715   | no |
| SLC5A2   | -0.047204346 | -1.247621274 | 0.212588786 | 0.290885225 | no |
| FAM169B  | 0.047202642  | 1.247576125  | 0.212605319 | 0.290888159 | no |
| PCDHGA12 | -0.047135133 | -1.245787889 | 0.213260871 | 0.291746705 | no |
| C10orf40 | -0.04713505  | -1.245785698 | 0.213261675 | 0.291746705 | no |
| TMEM209  | 0.047125763  | 1.245539693  | 0.213351973 | 0.291850487 | no |
| TARP     | 0.047105253  | 1.244996406  | 0.213551489 | 0.292103646 | no |
| IFNA8    | -0.047095933 | -1.244749508 | 0.213642204 | 0.292207961 | no |
| TRMU     | -0.04708404  | -1.244434488 | 0.213757988 | 0.292346547 | no |
| CPT1A    | 0.047070759  | 1.244082687  | 0.213887345 | 0.292503675 | no |
| STAG3L2  | 0.047068564  | 1.244024556  | 0.213908725 | 0.292513128 | no |
| SNRPA1   | -0.047031292 | -1.243037252 | 0.214272084 | 0.292990193 | no |
| C16orf74 | 0.047029444  | 1.242988303  | 0.214290111 | 0.292995026 | no |
| SPINK5   | -0.047017335 | -1.242667573 | 0.214408253 | 0.293136736 | no |
| KLHL20   | -0.047000514 | -1.242221992 | 0.214572462 | 0.293338361 | no |

|           |              |              |             |             |    |
|-----------|--------------|--------------|-------------|-------------|----|
| SNHG11    | 0.046999256  | 1.242188674  | 0.214584744 | 0.293338361 | no |
| SNORA32   | 0.046989942  | 1.241941975  | 0.214675702 | 0.29344286  | no |
| PRNP      | -0.046972598 | -1.241482547 | 0.214845169 | 0.293654653 | no |
| DEFB119   | -0.046970523 | -1.241427573 | 0.214865453 | 0.293662525 | no |
| C14orf145 | 0.046968407  | 1.241371529  | 0.214886134 | 0.293670938 | no |
| SP5       | 0.046966602  | 1.241323712  | 0.21490378  | 0.293675202 | no |
| CLDN6     | -0.046939998 | -1.240619038 | 0.215163947 | 0.293992459 | no |
| FRG2B     | -0.046939889 | -1.240616128 | 0.215165022 | 0.293992459 | no |
| C1orf122  | 0.046936082  | 1.240515298  | 0.215202268 | 0.294020883 | no |
| PIK3R3    | 0.04693479   | 1.240481076  | 0.21521491  | 0.294020883 | no |
| ZNF208    | -0.046912627 | -1.239894025 | 0.215431861 | 0.29429739  | no |
| NAA40     | -0.046885887 | -1.239185724 | 0.215693832 | 0.294635356 | no |
| HADH      | 0.04687869   | 1.238995103  | 0.215764374 | 0.294703161 | no |
| CPNE3     | 0.04687707   | 1.238952183  | 0.21578026  | 0.294703161 | no |
| HES7      | -0.046876362 | -1.238933435 | 0.215787199 | 0.294703161 | no |
| SERPINA7  | 0.046867592  | 1.238701142  | 0.215873192 | 0.294800688 | no |
| GP9       | -0.046863638 | -1.238596392 | 0.215911977 | 0.29483374  | no |
| HES1      | 0.046859271  | 1.238480735  | 0.215954807 | 0.294872309 | no |
| GOLIM4    | 0.046844614  | 1.238092498  | 0.216098622 | 0.295048754 | no |
| APOO      | 0.046837786  | 1.23791163   | 0.216165646 | 0.295120334 | no |
| PDCD4     | -0.046836019 | -1.237864825 | 0.216182992 | 0.295124088 | no |
| AP1G1     | -0.046818462 | -1.23739979  | 0.216355396 | 0.295339504 | no |
| OR11H4    | -0.046804251 | -1.237023369 | 0.21649502  | 0.295510148 | no |
| FAM47B    | 0.04679743   | 1.236842691  | 0.216562061 | 0.295581702 | no |
| SH3PXD2A  | 0.04678419   | 1.236491994  | 0.216692231 | 0.295730675 | no |
| PPP5C     | -0.046780718 | -1.236400021 | 0.216726378 | 0.295730675 | no |
| SLC25A11  | -0.046780449 | -1.236392912 | 0.216729018 | 0.295730675 | no |
| PLP1      | -0.046780378 | -1.236391031 | 0.216729717 | 0.295730675 | no |
| CLTA      | 0.046769177  | 1.236094336  | 0.2168399   | 0.295851171 | no |
| SCFD1     | -0.046768426 | -1.236074442 | 0.21684729  | 0.295851171 | no |
| TNFSF18   | -0.046755313 | -1.235727106 | 0.216976335 | 0.296001503 | no |
| SPHAR     | -0.046754254 | -1.235699056 | 0.216986758 | 0.296001503 | no |
| HOXC5     | 0.046738589  | 1.235284125  | 0.217140994 | 0.29618657  | no |
| CDH15     | -0.046737248 | -1.235248601 | 0.217154202 | 0.29618657  | no |
| NTSR1     | 0.046736012  | 1.235215871  | 0.217166372 | 0.29618657  | no |
| HMG3      | -0.046726648 | -1.234967857 | 0.217258608 | 0.296292381 | no |
| C12orf32  | 0.04669408   | 1.234105213  | 0.217579644 | 0.296710188 | no |
| IQCF6     | -0.046670599 | -1.233483252 | 0.21781132  | 0.296996966 | no |
| ZP4       | 0.046669788  | 1.233461785  | 0.21781932  | 0.296996966 | no |
| UCKL1AS   | -0.046662234 | -1.233261687 | 0.217893895 | 0.297078614 | no |
| CXADRP2   | 0.046652703  | 1.233009236  | 0.217988008 | 0.297186887 | no |
| FITM1     | -0.046642263 | -1.232732704 | 0.218091132 | 0.29730743  | no |
| ADRA2A    | 0.046637302  | 1.232601311  | 0.218140143 | 0.297337217 | no |
| ASNSD1    | -0.046637074 | -1.232595273 | 0.218142395 | 0.297337217 | no |
| VSIG2     | 0.046621217  | 1.232175263  | 0.218299118 | 0.297530778 | no |
| TMEM231   | 0.046613646  | 1.231974734  | 0.218373972 | 0.297612738 | no |
| PABPC1    | -0.046567352 | -1.230748536 | 0.218832094 | 0.29821699  | no |
| NME4      | -0.046559287 | -1.23053493  | 0.21891197  | 0.298305737 | no |
| OR6V1     | 0.046544519  | 1.230143764  | 0.219058298 | 0.298465025 | no |
| ABHD12B   | 0.04654451   | 1.230143522  | 0.219058389 | 0.298465025 | no |
| C3orf33   | -0.046541197 | -1.230055775 | 0.219091223 | 0.298489646 | no |

|            |              |              |             |             |    |
|------------|--------------|--------------|-------------|-------------|----|
| PAEP       | 0.046528726  | 1.229725471  | 0.219214852 | 0.298637954 | no |
| LOC392196  | -0.046526231 | -1.22965938  | 0.219239595 | 0.298651538 | no |
| SHISA2     | 0.04652314   | 1.229577507  | 0.219270249 | 0.298673172 | no |
| ZP3        | 0.046519752  | 1.229487765  | 0.219303853 | 0.298698821 | no |
| TROAP      | 0.046518039  | 1.2294424    | 0.219320842 | 0.298701838 | no |
| ARID1A     | -0.0465077   | -1.229168564 | 0.219423409 | 0.298821399 | no |
| C19orf60   | 0.046502786  | 1.229038405  | 0.219472173 | 0.298867677 | no |
| TMEM81     | -0.046496876 | -1.228881854 | 0.219530835 | 0.29891613  | no |
| SKIV2L     | -0.046496222 | -1.22886454  | 0.219537324 | 0.29891613  | no |
| JMJD6      | -0.046492457 | -1.22876483  | 0.219574693 | 0.298946879 | no |
| LANCL3     | 0.046488338  | 1.228655721  | 0.219615591 | 0.298982426 | no |
| FAM179A    | 0.046467457  | 1.228102664  | 0.219822978 | 0.299244611 | no |
| STRN       | 0.04646459   | 1.228026726  | 0.219851464 | 0.29926324  | no |
| ZCCHC3     | -0.046459586 | -1.227894192 | 0.219901188 | 0.299310773 | no |
| FANCA      | 0.046453413  | 1.227730692  | 0.21996254  | 0.299374126 | no |
| ZFYVE1     | -0.046433753 | -1.227209962 | 0.220158023 | 0.299620013 | no |
| METTL9     | -0.046405265 | -1.226455412 | 0.220441504 | 0.299985619 | no |
| SLC7A6     | 0.046398458  | 1.226275125  | 0.220509276 | 0.300057649 | no |
| IQCF3      | -0.046394004 | -1.226157153 | 0.220553631 | 0.300097807 | no |
| TADA3      | 0.046387519  | 1.225985396  | 0.22061822  | 0.300165489 | no |
| FAM184B    | -0.046372585 | -1.22558985  | 0.220767015 | 0.300329992 | no |
| NMU        | -0.046372402 | -1.22558501  | 0.220768836 | 0.300329992 | no |
| ETV3L      | 0.046359118  | 1.225233162  | 0.220901255 | 0.300489912 | no |
| GDF1       | -0.046322408 | -1.224260866 | 0.221267476 | 0.300967831 | no |
| LCT        | 0.046303276  | 1.223754141  | 0.221458511 | 0.301207411 | no |
| RLF        | 0.046293952  | 1.223507169  | 0.221551661 | 0.301302353 | no |
| NCRNA00189 | 0.046293305  | 1.223490047  | 0.22155812  | 0.301302353 | no |
| GPHA2      | 0.046289349  | 1.223385254  | 0.221597655 | 0.301335847 | no |
| CCDC55     | -0.046281194 | -1.223169263 | 0.221679155 | 0.301426401 | no |
| PFKFB4     | 0.046276697  | 1.22305015   | 0.22172411  | 0.301467253 | no |
| FGF19      | 0.046239188  | 1.222056713  | 0.222099299 | 0.301957073 | no |
| IP013      | -0.046220215 | -1.221554193 | 0.222289259 | 0.302195013 | no |
| SLC6A19    | -0.046212813 | -1.221358148 | 0.222363398 | 0.302275477 | no |
| TMED10P1   | 0.046187909  | 1.220698546  | 0.222612973 | 0.302592293 | no |
| RSPRY1     | -0.04618657  | -1.2206631   | 0.22262639  | 0.302592293 | no |
| TAC3       | -0.046182933 | -1.220566768 | 0.222662858 | 0.302621515 | no |
| CHRM3      | -0.046175117 | -1.220359765 | 0.222741236 | 0.302707691 | no |
| TLCD1      | 0.046171691  | 1.220269023  | 0.2227756   | 0.302734042 | no |
| CINP       | -0.046164003 | -1.220065402 | 0.222852726 | 0.302818496 | no |
| AQP8       | -0.04614885  | -1.219664062 | 0.223004797 | 0.303004771 | no |
| UQCRH      | -0.046137935 | -1.219374963 | 0.223114386 | 0.303133301 | no |
| NCLN       | 0.046122386  | 1.21896316   | 0.223270554 | 0.303325095 | no |
| CEACAM8    | 0.046110189  | 1.218640103  | 0.223393122 | 0.303471218 | no |
| OR13G1     | 0.046107208  | 1.218561174  | 0.223423075 | 0.303491516 | no |
| CCNK       | -0.046093282 | -1.218192329 | 0.223563088 | 0.303661304 | no |
| TMEM129    | -0.046087695 | -1.218044371 | 0.22361927  | 0.30371721  | no |
| C17orf37   | 0.046077364  | 1.217770747  | 0.223723196 | 0.30381383  | no |
| CEACAM18   | -0.046076303 | -1.21774264  | 0.223733873 | 0.30381383  | no |
| C3orf72    | 0.046076142  | 1.217738386  | 0.223735489 | 0.30381383  | no |
| KRT74      | -0.046052815 | -1.21712055  | 0.223970288 | 0.304112242 | no |
| OR7C1      | 0.04602856   | 1.216478169  | 0.224214603 | 0.304420394 | no |

|              |              |              |             |             |    |
|--------------|--------------|--------------|-------------|-------------|----|
| MTRF1        | 0.046027295  | 1.216444672  | 0.224227347 | 0.304420394 | no |
| NCR2         | 0.045992581  | 1.215525272  | 0.224577366 | 0.304875121 | no |
| C10orf28     | 0.045981666  | 1.215236183  | 0.224687504 | 0.305004159 | no |
| FICD         | 0.045970996  | 1.214953608  | 0.224795197 | 0.305129862 | no |
| PRR23C       | -0.045965825 | -1.214816652 | 0.224847406 | 0.30518024  | no |
| FLJ45340     | -0.045958134 | -1.214612945 | 0.224925078 | 0.305265169 | no |
| RFC4         | 0.045942665  | 1.214203259  | 0.225081345 | 0.305456748 | no |
| JAK1         | 0.045932484  | 1.213933625  | 0.225184235 | 0.305575868 | no |
| PSIMCT-1     | -0.045919913 | -1.213600695 | 0.225311324 | 0.305727809 | no |
| LOC440354    | 0.045918266  | 1.213557061  | 0.225327984 | 0.305729896 | no |
| HSD3B2       | -0.045907969 | -1.213284356 | 0.225432127 | 0.305847926 | no |
| MTMR2        | -0.045906674 | -1.213250055 | 0.225445229 | 0.305847926 | no |
| RGS5         | -0.045900024 | -1.21307393  | 0.225512511 | 0.30591694  | no |
| NRG1         | 0.045898475  | 1.213032925  | 0.225528177 | 0.30591694  | no |
| LMAN1L       | 0.045897159  | 1.212998071  | 0.225541493 | 0.30591694  | no |
| SNHG3        | 0.045893504  | 1.212901263  | 0.225578485 | 0.305946589 | no |
| KEL          | 0.045860149  | 1.212017879  | 0.225916233 | 0.306384116 | no |
| GTF2IRD2B    | -0.045825052 | -1.21108837  | 0.226272007 | 0.306846029 | no |
| LINGO3       | -0.045813737 | -1.210788698 | 0.226386793 | 0.306981099 | no |
| TBCC         | -0.045810233 | -1.210695884 | 0.226422353 | 0.307008728 | no |
| PKD1L1       | 0.045808298  | 1.210644642  | 0.226441988 | 0.30701476  | no |
| CALB2        | -0.045790866 | -1.210182988 | 0.226618932 | 0.307223075 | no |
| GATA2        | -0.045790168 | -1.210164491 | 0.226626023 | 0.307223075 | no |
| GPATCH4      | -0.045775346 | -1.209771953 | 0.226776558 | 0.307406533 | no |
| LOC100272228 | -0.045750241 | -1.209107058 | 0.227031701 | 0.30773176  | no |
| ZNF564       | 0.045745023  | 1.208968869  | 0.227084754 | 0.307783037 | no |
| MARK2        | -0.045723745 | -1.208405345 | 0.227301195 | 0.308055742 | no |
| PARL         | -0.045693769 | -1.207611479 | 0.227606356 | 0.308448643 | no |
| FBXL8        | 0.045681208  | 1.207278802  | 0.227734324 | 0.308601378 | no |
| NT5C3        | 0.045679046  | 1.207221561  | 0.227756347 | 0.308610537 | no |
| C3orf48      | 0.045658008  | 1.206664398  | 0.227970795 | 0.308880414 | no |
| PRAF2        | 0.045639078  | 1.206163059  | 0.22816388  | 0.309121311 | no |
| GJB5         | -0.045622216 | -1.205716502 | 0.228335965 | 0.309333727 | no |
| DEFA6        | -0.045614291 | -1.205506612 | 0.22841688  | 0.309422612 | no |
| ACOXL        | -0.045611693 | -1.205437827 | 0.228443402 | 0.309437806 | no |
| KRT38        | 0.045597498  | 1.205061872  | 0.2285884   | 0.30961347  | no |
| UAP1L1       | 0.045575147  | 1.204469963  | 0.22881682  | 0.309902095 | no |
| DUSP16       | 0.045573383  | 1.204423238  | 0.228834858 | 0.309905765 | no |
| ZSCAN20      | 0.045555325  | 1.203945009  | 0.229019538 | 0.310135099 | no |
| PSKH1        | -0.045542177 | -1.203596814 | 0.229154069 | 0.310296495 | no |
| GPX3         | -0.045540364 | -1.203548781 | 0.229172632 | 0.310300848 | no |
| CHKB-CPT1B   | 0.045529176  | 1.203252496  | 0.229287158 | 0.310435127 | no |
| TP53AIP1     | 0.04546301   | 1.201500241  | 0.229965307 | 0.311332434 | no |
| EXOSC9       | 0.04545927   | 1.201401191  | 0.230003683 | 0.31135793  | no |
| CNO          | 0.04545719   | 1.201346089  | 0.230025034 | 0.31135793  | no |
| C3orf75      | 0.04545539   | 1.201298431  | 0.230043502 | 0.31135793  | no |
| DPYS         | 0.045455172  | 1.201292657  | 0.230045739 | 0.31135793  | no |
| MYL1         | 0.045436554  | 1.200799589  | 0.230236869 | 0.311595757 | no |
| ROPN1        | 0.045421615  | 1.200403966  | 0.230390308 | 0.311767106 | no |
| KCNIP4       | -0.045421224 | -1.200393628 | 0.230394318 | 0.311767106 | no |
| TTLL11       | -0.045418601 | -1.200324158 | 0.230421269 | 0.311782708 | no |

|              |              |              |             |             |    |
|--------------|--------------|--------------|-------------|-------------|----|
| GPX5         | 0.045416818  | 1.200276947  | 0.230439586 | 0.311786626 | no |
| KRT76        | 0.045410229  | 1.200102443  | 0.2305073   | 0.311857373 | no |
| CXorf23      | -0.045391689 | -1.199611462 | 0.230697892 | 0.312094345 | no |
| VGLL2        | 0.045359746  | 1.198765534  | 0.231026534 | 0.312518029 | no |
| SLC26A9      | -0.045356599 | -1.198682175 | 0.231058937 | 0.31254095  | no |
| CPSF3        | 0.045354108  | 1.198616226  | 0.231084574 | 0.312554718 | no |
| MRPL51       | 0.045346723  | 1.198420652  | 0.231160615 | 0.312636653 | no |
| C9orf100     | 0.045323895  | 1.197816106  | 0.231395782 | 0.312933773 | no |
| FANCD2       | 0.045295633  | 1.197067661  | 0.23168716  | 0.313305021 | no |
| NOL11        | 0.045294263  | 1.197031385  | 0.231701289 | 0.313305021 | no |
| TMEM93       | 0.045290528  | 1.19693247   | 0.231739819 | 0.313336165 | no |
| CEP135       | 0.045270711  | 1.196407673  | 0.231944318 | 0.313591696 | no |
| FIBIN        | 0.045266894  | 1.196306603  | 0.231983717 | 0.313623991 | no |
| FBXO43       | 0.045251113  | 1.195888667  | 0.232146686 | 0.313823328 | no |
| LOC100302650 | 0.045245526  | 1.195740716  | 0.232204397 | 0.313880357 | no |
| FAM132A      | -0.045242404 | -1.195658057 | 0.232236645 | 0.31390296  | no |
| KIAA1009     | 0.045240861  | 1.195617199  | 0.232252585 | 0.313903521 | no |
| NLRP13       | -0.045215992 | -1.194958596 | 0.232509648 | 0.314229951 | no |
| GINS2        | 0.045147295  | 1.193139394  | 0.233220763 | 0.315169934 | no |
| RRP9         | -0.045145655 | -1.193095956 | 0.233237761 | 0.315171839 | no |
| RC3H2        | -0.045137539 | -1.192881026 | 0.233321882 | 0.31526444  | no |
| SNHG9        | 0.045121103  | 1.192445777  | 0.2334923   | 0.315473624 | no |
| RANBP2       | 0.045109969  | 1.192150941  | 0.23360779  | 0.315598448 | no |
| KRTAP5-5     | -0.045109187 | -1.192130227 | 0.233615905 | 0.315598448 | no |
| UBE2DNL      | -0.045103998 | -1.191992817 | 0.233669746 | 0.315647272 | no |
| GPR37L1      | -0.045102695 | -1.191958302 | 0.233683271 | 0.315647272 | no |
| PCDHB13      | -0.045064898 | -1.190957379 | 0.234075735 | 0.316156271 | no |
| EIF4A3       | 0.045051439  | 1.190600978  | 0.234215594 | 0.31632404  | no |
| ALDH3B2      | 0.045013837  | 1.189605214  | 0.234606666 | 0.316831045 | no |
| PATE3        | -0.044976116 | -1.188606324 | 0.234999431 | 0.317340268 | no |
| NLRX1        | -0.044958707 | -1.188145321 | 0.235180855 | 0.31756405  | no |
| GMCL1L       | 0.044957003  | 1.188100204  | 0.235198616 | 0.317566823 | no |
| TSPY2        | -0.044938953 | -1.187622209 | 0.235386842 | 0.317799745 | no |
| DMPK         | -0.044936034 | -1.187544915 | 0.235417289 | 0.317819628 | no |
| LANCL2       | 0.044922796  | 1.187194355  | 0.235555414 | 0.317984868 | no |
| FLJ25328     | -0.044913094 | -1.186937434 | 0.235656681 | 0.318100332 | no |
| SNX16        | 0.044901648  | 1.186634359  | 0.235776179 | 0.318224184 | no |
| AQP12B       | -0.044901291 | -1.186624891 | 0.235779913 | 0.318224184 | no |
| FBL          | -0.044898645 | -1.186554814 | 0.23580755  | 0.318224553 | no |
| MGC16142     | 0.04489825   | 1.186544378  | 0.235811666 | 0.318224553 | no |
| C16orf53     | -0.044891499 | -1.186365583 | 0.235882189 | 0.318297587 | no |
| PNPLA7       | -0.044890055 | -1.186327351 | 0.235897272 | 0.318297587 | no |
| ABHD2        | 0.044880607  | 1.186077165  | 0.235995985 | 0.318409531 | no |
| GPX4         | 0.044860884  | 1.185554884  | 0.23620215  | 0.318666427 | no |
| ZNF277       | -0.044854347 | -1.185381794 | 0.236270503 | 0.318737375 | no |
| TAF1L        | -0.044846832 | -1.18518279  | 0.236349108 | 0.318822142 | no |
| ZNF580       | -0.044844931 | -1.185132435 | 0.236369001 | 0.318827704 | no |
| DCAF15       | 0.044833019  | 1.184817013  | 0.236493634 | 0.318974536 | no |
| ABCB8        | 0.044808657  | 1.184171892  | 0.236748688 | 0.319297243 | no |
| HSPBP1       | -0.044790976 | -1.183703676 | 0.236933923 | 0.31952575  | no |
| FLJ30679     | 0.04477645   | 1.183319032  | 0.237086172 | 0.319705524 | no |

|           |              |              |             |             |    |
|-----------|--------------|--------------|-------------|-------------|----|
| ARX       | 0.04477524   | 1.183286999  | 0.237098854 | 0.319705524 | no |
| SPANXN1   | 0.044767071  | 1.183070668  | 0.237184516 | 0.319797296 | no |
| FPGS      | 0.044765733  | 1.183035235  | 0.237198548 | 0.319797296 | no |
| OCLM      | -0.044761022 | -1.182910492 | 0.237247955 | 0.319842579 | no |
| PSG3      | -0.044750957 | -1.182643959 | 0.237353545 | 0.319963594 | no |
| TMEM116   | 0.044748185  | 1.182570572  | 0.237382624 | 0.319981458 | no |
| NUBPL     | -0.044746551 | -1.18252731  | 0.237399768 | 0.319983233 | no |
| C3orf42   | 0.04473159   | 1.182131126  | 0.237556804 | 0.320173552 | no |
| ZNF599    | 0.044722515  | 1.18189082   | 0.23765209  | 0.320280627 | no |
| SPRR2D    | -0.044712618 | -1.181628733 | 0.237756044 | 0.320399366 | no |
| GBAS      | 0.044706636  | 1.18147035   | 0.23781888  | 0.320462685 | no |
| VCX2      | 0.044698886  | 1.181265125  | 0.237900318 | 0.320551058 | no |
| UBA2      | -0.044696149 | -1.181192635 | 0.237929088 | 0.32056846  | no |
| CA5A      | 0.044694274  | 1.181142996  | 0.237948791 | 0.320573642 | no |
| E2F6      | 0.044684655  | 1.180888284  | 0.238049908 | 0.320675896 | no |
| TACR1     | 0.044684037  | 1.180871906  | 0.238056411 | 0.320675896 | no |
| DPPA3     | -0.044654974 | -1.180102328 | 0.238362114 | 0.321066304 | no |
| ZFAT      | -0.044653455 | -1.180062109 | 0.238378098 | 0.321066444 | no |
| AK3       | 0.044629541  | 1.179428862  | 0.238629866 | 0.321384135 | no |
| RWDD3     | 0.044613276  | 1.178998174  | 0.238801208 | 0.321593473 | no |
| AP2A2     | -0.044610741 | -1.17893106  | 0.238827915 | 0.321602628 | no |
| RNF111    | 0.044609612  | 1.178901149  | 0.238839819 | 0.321602628 | no |
| RGS13     | 0.044604652  | 1.17876981   | 0.238892093 | 0.321651594 | no |
| PRODH2    | -0.044538618 | -1.177021264 | 0.239588801 | 0.322555879 | no |
| HNRNPAB   | 0.044537973  | 1.177004175  | 0.239595617 | 0.322555879 | no |
| SYVN1     | -0.044519646 | -1.176518901 | 0.239789233 | 0.32279504  | no |
| PCDHGA11  | -0.044505204 | -1.176136472 | 0.239941893 | 0.322979041 | no |
| MAGEB3    | -0.044496853 | -1.175915356 | 0.24003019  | 0.32306658  | no |
| PACRGL    | -0.044496031 | -1.175893587 | 0.240038884 | 0.32306658  | no |
| KRT83     | -0.0444817   | -1.175514114 | 0.240190476 | 0.323249087 | no |
| AGBL4     | -0.044465227 | -1.175077904 | 0.240364816 | 0.323462183 | no |
| GFAP      | 0.044448011  | 1.174622055  | 0.2405471   | 0.323685941 | no |
| LMX1A     | -0.044429682 | -1.174136709 | 0.240741287 | 0.323925685 | no |
| SNORD9    | 0.044409267  | 1.173596136  | 0.240957701 | 0.324195301 | no |
| RALA      | 0.044397045  | 1.173272497  | 0.241087332 | 0.324348129 | no |
| NOP2      | 0.044388446  | 1.173044806  | 0.241178562 | 0.324449276 | no |
| MTX2      | -0.044380411 | -1.172832053 | 0.241263829 | 0.324542388 | no |
| PPEF1     | 0.044372362  | 1.172618923  | 0.241349268 | 0.324635719 | no |
| SRP14     | 0.044367472  | 1.172489435  | 0.241401187 | 0.324683954 | no |
| PCDHB5    | -0.04436461  | -1.172413677 | 0.241431566 | 0.324703213 | no |
| LOC728640 | -0.044361609 | -1.1723342   | 0.24146344  | 0.324724479 | no |
| POU4F3    | -0.044356684 | -1.172203803 | 0.241515741 | 0.324773212 | no |
| BHLHE22   | -0.044347448 | -1.171959229 | 0.241613859 | 0.324883546 | no |
| TRIM74    | -0.044330027 | -1.171497938 | 0.241798996 | 0.325097384 | no |
| C19orf70  | 0.044329457  | 1.171482863  | 0.241805048 | 0.325097384 | no |
| GRAMD2    | 0.044319349  | 1.17121522   | 0.241912513 | 0.32522024  | no |
| CEACAM20  | 0.044311464  | 1.171006417  | 0.241996376 | 0.325311351 | no |
| DCLK1     | -0.044308655 | -1.17093205  | 0.242026249 | 0.325329879 | no |
| C20orf12  | 0.044298224  | 1.170655841  | 0.242137226 | 0.325457415 | no |
| OR1L1     | 0.044296073  | 1.170598894  | 0.242160111 | 0.325466537 | no |
| C9orf50   | -0.04427673  | -1.170086715 | 0.242366005 | 0.325721609 | no |



|           |              |              |             |             |    |
|-----------|--------------|--------------|-------------|-------------|----|
| LSMD1     | 0.044255661  | 1.169528834  | 0.242590412 | 0.326001525 | no |
| NOX1      | -0.044249835 | -1.169374584 | 0.242652485 | 0.326063268 | no |
| AMMECR1L  | -0.044230255 | -1.168856125 | 0.242861203 | 0.326322044 | no |
| NIF3L1    | -0.044203856 | -1.168157128 | 0.243142801 | 0.326678705 | no |
| TNP03     | -0.044194281 | -1.167903581 | 0.243245002 | 0.326794302 | no |
| STX4      | 0.044191212  | 1.167822322  | 0.243277763 | 0.326816598 | no |
| MYPOP     | -0.044185992 | -1.167684104 | 0.243333494 | 0.326855215 | no |
| SNORA34   | 0.044185491  | 1.167670844  | 0.243338841 | 0.326855215 | no |
| C6orf182  | 0.04417974   | 1.167518568  | 0.243400253 | 0.326915985 | no |
| IVNS1ABP  | -0.044172087 | -1.16731593  | 0.243481992 | 0.327004046 | no |
| TYW1B     | 0.04416396   | 1.167100745  | 0.243568813 | 0.327098921 | no |
| CT45A1    | -0.044119378 | -1.165920298 | 0.244045477 | 0.327717286 | no |
| SNORA68   | 0.044097397  | 1.165338275  | 0.24428074  | 0.328011423 | no |
| PARS2     | 0.04407935   | 1.164860446  | 0.244474004 | 0.328249131 | no |
| GABRR1    | 0.044071195  | 1.164644499  | 0.244561383 | 0.328344647 | no |
| ZNF75A    | -0.04406679  | -1.164527872 | 0.244608583 | 0.32838621  | no |
| ADAM18    | 0.044064207  | 1.164459491  | 0.24463626  | 0.32840156  | no |
| C1QTNF8   | -0.044062574 | -1.164416253 | 0.244653761 | 0.32840325  | no |
| LRRN3     | -0.044057685 | -1.164286801 | 0.244706166 | 0.328451786 | no |
| C8orf85   | 0.044044741  | 1.163944073  | 0.244844946 | 0.328589675 | no |
| C17orf107 | -0.044043627 | -1.163914568 | 0.244856896 | 0.328589675 | no |
| REEP5     | -0.044043556 | -1.163912697 | 0.244857654 | 0.328589675 | no |
| C14orf165 | -0.044041344 | -1.163854124 | 0.244881378 | 0.328599701 | no |
| SCNM1     | 0.044030274  | 1.163561011  | 0.245000124 | 0.328737225 | no |
| IFNA2     | -0.04401161  | -1.163066832 | 0.245200417 | 0.328984142 | no |
| LOC389493 | -0.044004379 | -1.162875371 | 0.245278049 | 0.329066462 | no |
| MRPS17    | 0.043987537  | 1.162429432  | 0.24545893  | 0.329287283 | no |
| F9        | -0.043983708 | -1.162328068 | 0.245500058 | 0.329320606 | no |
| ILVBL     | -0.043976252 | -1.162130648 | 0.245580174 | 0.32940622  | no |
| C20orf166 | 0.043964818  | 1.161827898  | 0.245703071 | 0.329549203 | no |
| TMEM200C  | -0.043954953 | -1.161566709 | 0.245809131 | 0.329669587 | no |
| GAMT      | -0.043951628 | -1.16147865  | 0.245844896 | 0.329695683 | no |
| LOH3CR2A  | 0.043940298  | 1.161178658  | 0.245966766 | 0.32983724  | no |
| MAP1LC3A  | 0.043921946  | 1.160692755  | 0.24616425  | 0.33008017  | no |
| OR6F1     | 0.043912724  | 1.160448579  | 0.246263532 | 0.330191397 | no |
| OR51B4    | 0.04391052   | 1.160390215  | 0.246287266 | 0.330201323 | no |
| ARRDC2    | 0.043903688  | 1.160209347  | 0.24636083  | 0.33027805  | no |
| ZNF789    | 0.043886675  | 1.159758873  | 0.246544117 | 0.330501854 | no |
| GTF2H5    | -0.043879322 | -1.159564185 | 0.246623361 | 0.330586164 | no |
| ZNF484    | -0.04386883  | -1.159286404 | 0.246736456 | 0.330715836 | no |
| PKLR      | -0.043857723 | -1.158992297 | 0.246856239 | 0.330840045 | no |
| SDC3      | -0.043856588 | -1.158962264 | 0.246868473 | 0.330840045 | no |
| PABPC1P2  | -0.043855685 | -1.158938347 | 0.246878215 | 0.330840045 | no |
| CLDN16    | -0.043853254 | -1.158873971 | 0.246904441 | 0.33085326  | no |
| TBC1D20   | -0.043845565 | -1.158670402 | 0.246987385 | 0.330942471 | no |
| LBX2      | 0.043833072  | 1.158339611  | 0.247122207 | 0.331101178 | no |
| JPH1      | 0.043825872  | 1.158148991  | 0.247199922 | 0.331177165 | no |
| FCAMR     | 0.043824783  | 1.15812015   | 0.247211682 | 0.331177165 | no |
| DDIT3     | 0.043816238  | 1.157893908  | 0.247303945 | 0.331278815 | no |
| CABP5     | -0.043809591 | -1.157717926 | 0.247375729 | 0.33135302  | no |
| HS3ST1    | 0.043798161  | 1.157415281  | 0.247499213 | 0.331496461 | no |

|           |              |              |             |             |    |
|-----------|--------------|--------------|-------------|-------------|----|
| TARS      | 0.043790883  | 1.157222576  | 0.247577862 | 0.331579837 | no |
| FOXJ2     | -0.043777117 | -1.1568581   | 0.247726665 | 0.331757152 | no |
| EGR4      | -0.043771502 | -1.156709446 | 0.247787373 | 0.331796831 | no |
| THAP5     | -0.043771341 | -1.156705179 | 0.247789116 | 0.331796831 | no |
| CREB3     | 0.043759955  | 1.156403707  | 0.247912266 | 0.331939748 | no |
| RPL36A    | 0.043758269  | 1.156359073  | 0.247930502 | 0.331942182 | no |
| MRPS18A   | 0.043742793  | 1.155949329  | 0.248097958 | 0.332142889 | no |
| LRRCS8D   | 0.043741379  | 1.155911877  | 0.248113268 | 0.332142889 | no |
| TXNDC2    | -0.043729752 | -1.155604027 | 0.248239139 | 0.332289387 | no |
| GCM1      | 0.043725178  | 1.155482941  | 0.248288659 | 0.332333672 | no |
| TSPAN5    | -0.043723326 | -1.155433895 | 0.24830872  | 0.332338521 | no |
| ST3GAL3   | -0.043670393 | -1.154032418 | 0.248882421 | 0.333084318 | no |
| DHRS9     | -0.043661929 | -1.153808307 | 0.248974248 | 0.333185157 | no |
| RPL27     | 0.043643795  | 1.153328204  | 0.249171045 | 0.333426447 | no |
| CYP21A2   | 0.043623691  | 1.152795921  | 0.249389358 | 0.333696495 | no |
| TRAF3IP2  | 0.043620113  | 1.152701182  | 0.249428229 | 0.333726419 | no |
| C6orf155  | -0.043611635 | -1.152476708 | 0.249520345 | 0.333785213 | no |
| GYPB      | -0.043611542 | -1.15247426  | 0.24952135  | 0.333785213 | no |
| FBX042    | 0.04361151   | 1.15247341   | 0.249521699 | 0.333785213 | no |
| ZFP42     | 0.043609249  | 1.15241355   | 0.249546268 | 0.333795993 | no |
| CAPN13    | -0.043600131 | -1.152172136 | 0.24964537  | 0.333906463 | no |
| MYBPHL    | 0.043594742  | 1.152029461  | 0.249703952 | 0.333962724 | no |
| FAM22F    | -0.043579997 | -1.151639074 | 0.249864294 | 0.334155067 | no |
| IDH2      | -0.043571804 | -1.15142215  | 0.249953421 | 0.334252151 | no |
| MIA3      | -0.043556401 | -1.151014343 | 0.250121037 | 0.334454175 | no |
| XRCC3     | -0.043553582 | -1.150939705 | 0.250151723 | 0.334473086 | no |
| HTR1F     | 0.043548667  | 1.150809556  | 0.250205237 | 0.334522516 | no |
| CMBL      | -0.04354705  | -1.150766747 | 0.250222841 | 0.33452393  | no |
| XRCC2     | 0.043530781  | 1.150336024  | 0.250400011 | 0.334738656 | no |
| TRHR      | -0.043498846 | -1.149490512 | 0.250748052 | 0.33518176  | no |
| SRP9      | 0.043493518  | 1.149349439  | 0.250806156 | 0.335237264 | no |
| MOCS3     | 0.043490798  | 1.149277426  | 0.250835819 | 0.335254749 | no |
| NAALAD2   | 0.043482796  | 1.149065567  | 0.250923101 | 0.335349238 | no |
| IP6K3     | 0.043479866  | 1.148988003  | 0.250955062 | 0.335369783 | no |
| CDKN2B    | 0.043472634  | 1.14879653   | 0.251033971 | 0.335452281 | no |
| C22orf28  | 0.043471167  | 1.148757695  | 0.251049978 | 0.335452281 | no |
| NAT2      | 0.04346926   | 1.148707195  | 0.251070794 | 0.335457924 | no |
| NTN1      | 0.043452435  | 1.148261734  | 0.251254462 | 0.335681141 | no |
| MOGAT3    | -0.043441758 | -1.147979064 | 0.251371058 | 0.335814725 | no |
| B4GALNT1  | -0.043439022 | -1.147906613 | 0.251400949 | 0.335832467 | no |
| ZBTB2     | 0.043427603  | 1.147604292  | 0.251525703 | 0.33597692  | no |
| POLR2C    | 0.043423995  | 1.147508776  | 0.251565127 | 0.336007382 | no |
| OR10A6    | -0.043417194 | -1.147328717 | 0.251639458 | 0.33608446  | no |
| BNC1      | 0.043409763  | 1.147131977  | 0.251720693 | 0.336170749 | no |
| HSPA12B   | -0.043367749 | -1.146019617 | 0.252180335 | 0.336762352 | no |
| SERGEF    | -0.043343145 | -1.145368231 | 0.252449768 | 0.337099889 | no |
| C6orf127  | -0.043262449 | -1.143231783 | 0.25333488  | 0.338259451 | no |
| SDS       | 0.043255937  | 1.143059387  | 0.253406397 | 0.338319835 | no |
| GOLGA8C   | -0.043255284 | -1.143042095 | 0.253413571 | 0.338319835 | no |
| ANKRD19   | -0.043231016 | -1.142399612 | 0.253680227 | 0.338653472 | no |
| LOC286467 | -0.043223039 | -1.142188414 | 0.253767926 | 0.338748179 | no |

|            |              |              |             |             |    |
|------------|--------------|--------------|-------------|-------------|----|
| ESF1       | -0.043217797 | -1.142049625 | 0.253825568 | 0.338802756 | no |
| SERPINI2   | -0.043180872 | -1.141072038 | 0.254231843 | 0.339322644 | no |
| LOC388796  | 0.043178206  | 1.141001463  | 0.254261191 | 0.339333765 | no |
| CLOCK      | 0.043177066  | 1.14097128   | 0.254273743 | 0.339333765 | no |
| C15orf42   | -0.043167524 | -1.140718653 | 0.254378818 | 0.339451584 | no |
| BIN1       | -0.043145149 | -1.140126298 | 0.254625315 | 0.339758092 | no |
| SCN1B      | -0.043142464 | -1.140055214 | 0.254654906 | 0.339775153 | no |
| HAS1       | 0.043132685  | 1.139796319  | 0.254762701 | 0.339890713 | no |
| MAP2K5     | -0.043131557 | -1.139766452 | 0.254775139 | 0.339890713 | no |
| COPS7A     | 0.043105325  | 1.139071964  | 0.255064467 | 0.340254248 | no |
| LOC572558  | 0.043103111  | 1.139013338  | 0.255088901 | 0.340264393 | no |
| C17orf93   | 0.043089891  | 1.138663357  | 0.255234802 | 0.340436549 | no |
| ZNF695     | -0.04308054  | -1.138415789 | 0.255338043 | 0.340537114 | no |
| OR56B1     | 0.043080011  | 1.138401785  | 0.255343884 | 0.340537114 | no |
| MINK1      | -0.04307212  | -1.138192867 | 0.255431032 | 0.340630869 | no |
| CENPB      | 0.043049952  | 1.137605994  | 0.25567595  | 0.340934992 | no |
| CEP170     | -0.043047412 | -1.137538752 | 0.255704022 | 0.340949939 | no |
| PXMP2      | -0.043041795 | -1.137390048 | 0.255766111 | 0.341010237 | no |
| CRIP2      | -0.043038238 | -1.137295875 | 0.255805437 | 0.341011849 | no |
| C8orf47    | -0.043036458 | -1.137248764 | 0.255825112 | 0.341011849 | no |
| FLJ44635   | 0.043035928  | 1.137234711  | 0.255830981 | 0.341011849 | no |
| MRPS11     | 0.043035583  | 1.137225597  | 0.255834787 | 0.341011849 | no |
| APOA5      | -0.043025152 | -1.13694944  | 0.255950141 | 0.341143118 | no |
| C6orf10    | 0.043017341  | 1.13674264   | 0.256036548 | 0.34123579  | no |
| PHB        | 0.042983358  | 1.135842976  | 0.256412689 | 0.341711243 | no |
| LOC253039  | -0.042982057 | -1.135808539 | 0.256427094 | 0.341711243 | no |
| APEH       | 0.042976048  | 1.135649439  | 0.256493655 | 0.341777414 | no |
| C14orf53   | -0.042919687 | -1.134157347 | 0.257118468 | 0.342587398 | no |
| LOC347376  | -0.042916072 | -1.134061648 | 0.257158578 | 0.342618262 | no |
| C10orf110  | -0.042903721 | -1.133734677 | 0.257295653 | 0.342778302 | no |
| HIST1H2BG  | 0.042901847  | 1.133685059  | 0.257316459 | 0.342783433 | no |
| FAM83E     | -0.04288636  | -1.133275054 | 0.257488425 | 0.342963531 | no |
| CAGE1      | 0.042885606  | 1.133255096  | 0.257496798 | 0.342963531 | no |
| PEX14      | -0.042885089 | -1.133241405 | 0.257502542 | 0.342963531 | no |
| C9orf169   | -0.042877101 | -1.133029935 | 0.257591273 | 0.34305911  | no |
| TAS1R2     | -0.042862384 | -1.132640325 | 0.257754805 | 0.343254291 | no |
| CARNS1     | -0.042843987 | -1.132153281 | 0.257959335 | 0.343504039 | no |
| KREMEN2    | -0.042841282 | -1.132081661 | 0.25798942  | 0.343521476 | no |
| LOC728819  | 0.042826033  | 1.131677989  | 0.258159038 | 0.343724691 | no |
| LOC642587  | -0.042815122 | -1.131389118 | 0.258280465 | 0.34386372  | no |
| NCRNA00110 | -0.042812559 | -1.131321266 | 0.258308992 | 0.343879055 | no |
| FKBP2      | -0.042806146 | -1.131151507 | 0.258380375 | 0.343951437 | no |
| DCDC2B     | 0.042803028  | 1.131068956  | 0.258415092 | 0.343975004 | no |
| TARM1      | 0.042794552  | 1.130844561  | 0.258509478 | 0.344077987 | no |
| ADRB3      | 0.042789219  | 1.130703391  | 0.25856887  | 0.344134383 | no |
| CRBN       | -0.042786154 | -1.130622231 | 0.258603019 | 0.344157178 | no |
| NACAD      | -0.042769824 | -1.130189925 | 0.258784972 | 0.344376658 | no |
| MYH4       | -0.042764137 | -1.130039377 | 0.258848356 | 0.344438335 | no |
| NCRNA00201 | -0.042755021 | -1.129798052 | 0.258949983 | 0.344550889 | no |
| FABP12     | 0.042751679  | 1.129709562  | 0.258987255 | 0.344577804 | no |
| LST-3TM12  | -0.042749835 | -1.129660757 | 0.259007813 | 0.344582481 | no |

|            |              |              |             |             |    |
|------------|--------------|--------------|-------------|-------------|----|
| PATE1      | -0.042729685 | -1.129127324 | 0.259232585 | 0.344858824 | no |
| WRN        | 0.042726555  | 1.129044463  | 0.259267512 | 0.344882595 | no |
| C20orf173  | -0.042712039 | -1.128660177 | 0.259429537 | 0.34507542  | no |
| KRR1       | 0.042710461  | 1.128618412  | 0.259447151 | 0.345076146 | no |
| ZBTB9      | -0.042708154 | -1.128557339 | 0.259472909 | 0.345087703 | no |
| TRDMT1     | 0.042678908  | 1.127783103  | 0.259799598 | 0.345491368 | no |
| REXO1L1    | 0.042677924  | 1.127757035  | 0.259810602 | 0.345491368 | no |
| ALKBH3     | 0.042675125  | 1.127682937  | 0.259841884 | 0.345510241 | no |
| LSM2       | 0.042673292  | 1.127634415  | 0.25986237  | 0.345514757 | no |
| TRIM36     | 0.042671032  | 1.127574602  | 0.259887624 | 0.345525612 | no |
| OR10G7     | -0.042667838 | -1.127490044 | 0.259923329 | 0.34555036  | no |
| AAA1       | 0.042664724  | 1.127407593  | 0.259958148 | 0.345551926 | no |
| MRPS18B    | -0.042664401 | -1.127399038 | 0.259961761 | 0.345551926 | no |
| UNC13B     | -0.042663147 | -1.12736584  | 0.259975781 | 0.345551926 | no |
| ZNF322A    | -0.042645512 | -1.126899008 | 0.260172992 | 0.345791319 | no |
| TMEM143    | 0.042635191  | 1.126625772  | 0.260288467 | 0.345922055 | no |
| STX16      | 0.042632981  | 1.126567281  | 0.260313191 | 0.345932174 | no |
| C16orf61   | 0.042628596  | 1.126451193  | 0.260362267 | 0.345974651 | no |
| PLS1       | -0.042623258 | -1.126309886 | 0.260422011 | 0.346031298 | no |
| BEND6      | -0.042618241 | -1.126177065 | 0.260478177 | 0.346083182 | no |
| BCL7C      | 0.042591914  | 1.125480109  | 0.260773035 | 0.346452177 | no |
| OR10W1     | -0.04257557  | -1.125047447 | 0.260956196 | 0.346672737 | no |
| RASGRP2    | 0.042568091  | 1.124849439  | 0.26104005  | 0.346761349 | no |
| AGAP5      | -0.042559124 | -1.124612064 | 0.261140599 | 0.346872126 | no |
| KRTAP10-10 | 0.042512321  | 1.123373071  | 0.261665858 | 0.347546992 | no |
| KRTAP9-8   | 0.042506149  | 1.123209692  | 0.261735175 | 0.347616223 | no |
| ZNF527     | 0.042469578  | 1.122241555  | 0.262146191 | 0.348139234 | no |
| PPPDE2     | -0.04246765  | -1.122190532 | 0.262167865 | 0.348145149 | no |
| NHLRC2     | 0.042459459  | 1.121973679  | 0.262259995 | 0.34824462  | no |
| FUBP1      | 0.042451916  | 1.121773999  | 0.262344849 | 0.348320301 | no |
| OR1E2      | -0.042451329 | -1.121758475 | 0.262351447 | 0.348320301 | no |
| DPH2       | 0.042427869  | 1.12113743   | 0.262615486 | 0.348631874 | no |
| STAU1      | 0.042427414  | 1.121125387  | 0.262620608 | 0.348631874 | no |
| PROP1      | -0.0424163   | -1.120831182 | 0.262745755 | 0.348775109 | no |
| TRIM49L    | -0.042412035 | -1.120718275 | 0.262793794 | 0.348815975 | no |
| LOC143188  | 0.042407531  | 1.120599028  | 0.262844538 | 0.348860425 | no |
| RBBP7      | -0.04238292  | -1.119947544 | 0.263121882 | 0.349205607 | no |
| CHCHD5     | 0.042367139  | 1.119529785  | 0.263299834 | 0.349386281 | no |
| C11orf67   | -0.042366556 | -1.119514338 | 0.263306415 | 0.349386281 | no |
| RARA       | -0.04236625  | -1.119506252 | 0.263309861 | 0.349386281 | no |
| RXFP3      | -0.042341896 | -1.11886155  | 0.263584653 | 0.349727951 | no |
| UBR2       | 0.042336118  | 1.118708594  | 0.263649877 | 0.349791536 | no |
| MAP6D1     | -0.042322258 | -1.118341704 | 0.263806372 | 0.349976196 | no |
| ZCCHC17    | 0.04231037   | 1.118026995  | 0.263940661 | 0.350131375 | no |
| PAPSS1     | -0.042308824 | -1.117986068 | 0.263958129 | 0.350131573 | no |
| HIST1H2AM  | 0.042305616  | 1.117901146  | 0.263994375 | 0.350149799 | no |
| IFT88      | -0.042304542 | -1.117872727 | 0.264006506 | 0.350149799 | no |
| UTY        | 0.04229355   | 1.11758175   | 0.264130732 | 0.35029158  | no |
| COL28A1    | -0.042285677 | -1.117373337 | 0.264219734 | 0.350386631 | no |
| COPE       | 0.042272701  | 1.117029843  | 0.264366467 | 0.350558223 | no |
| ARMCX5     | -0.042261033 | -1.116720957 | 0.264498464 | 0.350676483 | no |

|          |              |              |             |             |    |
|----------|--------------|--------------|-------------|-------------|----|
| MRI1     | 0.042260863  | 1.11671646   | 0.264500386 | 0.350676483 | no |
| TOR1AIP1 | -0.042260218 | -1.116699383 | 0.264507685 | 0.350676483 | no |
| ENO3     | -0.042247281 | -1.116356915 | 0.264654089 | 0.350847576 | no |
| INTS4L2  | -0.042228643 | -1.115863551 | 0.2648651   | 0.351104287 | no |
| C20orf54 | -0.042190877 | -1.114863826 | 0.265293037 | 0.351648503 | no |
| MAPKAPK5 | 0.042182127  | 1.114632198  | 0.265392254 | 0.351756955 | no |
| PEX12    | -0.042174775 | -1.114437572 | 0.265475642 | 0.351844413 | no |
| GGT8P    | 0.042162723  | 1.114118537  | 0.265612371 | 0.351998227 | no |
| METRN    | -0.042159965 | -1.114045554 | 0.265643657 | 0.351998227 | no |
| ACTL9    | 0.042159941  | 1.11404492   | 0.265643928 | 0.351998227 | no |
| SKA3     | 0.042061305  | 1.111433906  | 0.266764855 | 0.353460374 | no |
| NUP188   | 0.042046886  | 1.111052228  | 0.266928985 | 0.353654667 | no |
| PPFIA1   | 0.04202426   | 1.110453286  | 0.267186683 | 0.353972896 | no |
| KRTDAP   | -0.042015304 | -1.110216201 | 0.267288738 | 0.354084897 | no |
| SMEK2    | -0.042003176 | -1.109895175 | 0.267426968 | 0.354244804 | no |
| SLC7A11  | 0.041999275  | 1.109791919  | 0.26747144  | 0.354280501 | no |
| PPP6C    | -0.041942961 | -1.108301245 | 0.268114026 | 0.355108378 | no |
| HAO2     | 0.041939067  | 1.10819816   | 0.268158503 | 0.35514402  | no |
| KIAA1826 | 0.041935161  | 1.108094759  | 0.26820312  | 0.355179844 | no |
| SPINK13  | 0.041933588  | 1.108053135  | 0.268221083 | 0.355180368 | no |
| UGT3A1   | -0.041905755 | -1.107316377 | 0.268539157 | 0.355578275 | no |
| TOP1MT   | -0.041826909 | -1.105229304 | 0.269441602 | 0.356749857 | no |
| MYF6     | 0.041819922  | 1.105044347  | 0.269521678 | 0.356825435 | no |
| SH3RF1   | -0.041818848 | -1.10501593  | 0.269533982 | 0.356825435 | no |
| SPARC    | -0.041811699 | -1.1048267   | 0.269615927 | 0.356899513 | no |
| POF1B    | 0.041810887  | 1.104805189  | 0.269625243 | 0.356899513 | no |
| CDH1     | -0.04178908  | -1.104227951 | 0.269875324 | 0.357207156 | no |
| THOC1    | -0.041776444 | -1.103893501 | 0.270020294 | 0.357375641 | no |
| ETNK1    | 0.041738311  | 1.102884111  | 0.270458143 | 0.357931711 | no |
| SPC24    | 0.041724706  | 1.102523979  | 0.270614478 | 0.358115167 | no |
| C2orf89  | 0.041721271  | 1.102433066  | 0.270653954 | 0.358143965 | no |
| TRAF2    | 0.041706358  | 1.102038316  | 0.270825405 | 0.358347385 | no |
| DMGDH    | 0.04169223   | 1.101664353  | 0.270987897 | 0.358538924 | no |
| DEFB134  | 0.041688941  | 1.101577287  | 0.271025738 | 0.358565526 | no |
| SLC44A1  | -0.041682141 | -1.101397312 | 0.27110397  | 0.358645558 | no |
| GPR139   | 0.041676303  | 1.101242781  | 0.271171155 | 0.358696016 | no |
| ZNF385A  | -0.041675744 | -1.101227972 | 0.271177595 | 0.358696016 | no |
| MED30    | 0.041673155  | 1.101159446  | 0.271207392 | 0.358711961 | no |
| SNORA6   | 0.041664135  | 1.100920686  | 0.271311228 | 0.358812193 | no |
| INHBE    | 0.041663489  | 1.100903584  | 0.271318667 | 0.358812193 | no |
| CTAG1B   | -0.041650672 | -1.100564318 | 0.271466264 | 0.358983905 | no |
| HAND1    | 0.041645739  | 1.100433757  | 0.271523079 | 0.359035553 | no |
| IP6K2    | -0.041638553 | -1.100243543 | 0.271605867 | 0.359121536 | no |
| CD3EAP   | 0.041634715  | 1.100141943  | 0.271650094 | 0.359156526 | no |
| MRPL19   | -0.041622701 | -1.099823946 | 0.271788552 | 0.359298624 | no |
| ZNF705A  | -0.041622305 | -1.099813473 | 0.271793113 | 0.359298624 | no |
| ZNF235   | 0.04160819   | 1.099439857  | 0.271955852 | 0.359471138 | no |
| EFCAB3   | 0.041607903  | 1.099432238  | 0.271959171 | 0.359471138 | no |
| DSCR8    | 0.04160443   | 1.099340323  | 0.271999218 | 0.359500568 | no |
| WNT10A   | 0.041582455  | 1.098758663  | 0.272252737 | 0.359805978 | no |
| KCNJ1    | 0.041581316  | 1.098728508  | 0.272265884 | 0.359805978 | no |

|           |              |              |             |             |    |
|-----------|--------------|--------------|-------------|-------------|----|
| LMO1      | -0.041557957 | -1.0981102   | 0.272535563 | 0.360138824 | no |
| MYO15A    | -0.041553304 | -1.09798706  | 0.272589293 | 0.360186284 | no |
| FOXA2     | 0.041545252  | 1.097773922  | 0.27268231  | 0.360285645 | no |
| ABCC10    | 0.041525408  | 1.097248654  | 0.272911636 | 0.360565083 | no |
| COL9A1    | -0.041523819 | -1.097206616 | 0.272929996 | 0.360565777 | no |
| MEP1B     | -0.041517594 | -1.097041845 | 0.273001964 | 0.360637288 | no |
| KDSR      | 0.041514936  | 1.096971476  | 0.273032703 | 0.360654331 | no |
| NDEL1     | 0.041508284  | 1.096795416  | 0.273109622 | 0.360732367 | no |
| URB1      | 0.041486811  | 1.096227043  | 0.273358041 | 0.3610369   | no |
| SNORA5A   | 0.041481676  | 1.096091113  | 0.273417475 | 0.361091809 | no |
| RHOU      | -0.041476332 | -1.095949653 | 0.273479336 | 0.361149916 | no |
| ANKRD37   | 0.041474587  | 1.095903483  | 0.273499529 | 0.361152993 | no |
| PSMD10    | -0.041472948 | -1.095860089 | 0.273518508 | 0.361154467 | no |
| USP28     | 0.041451978  | 1.095305029  | 0.273761355 | 0.361451516 | no |
| C12orf41  | 0.041444301  | 1.09510183   | 0.273850294 | 0.361545334 | no |
| RPS14     | 0.041433194  | 1.094807851  | 0.273979003 | 0.361691641 | no |
| SMARCD1   | -0.041430435 | -1.094734807 | 0.274010989 | 0.361710249 | no |
| HBM       | 0.041413217  | 1.094279085  | 0.274210609 | 0.361950127 | no |
| RNASEH2A  | 0.041405551  | 1.094076166  | 0.274299526 | 0.362040068 | no |
| ZBTB37    | -0.041404255 | -1.094041857 | 0.274314561 | 0.362040068 | no |
| ATRX      | -0.041399691 | -1.09392105  | 0.274367509 | 0.362086312 | no |
| SLC6A20   | 0.041380715  | 1.093418799  | 0.274587712 | 0.362353264 | no |
| GMEB1     | 0.041367333  | 1.093064591  | 0.27474308  | 0.36253463  | no |
| YBX2      | -0.041353979 | -1.09271113  | 0.274898181 | 0.362715619 | no |
| MMP21     | 0.041337421  | 1.092272865  | 0.275090578 | 0.362945791 | no |
| SLC17A4   | -0.041332073 | -1.092131317 | 0.275152737 | 0.363004113 | no |
| SNORA25   | -0.041312024 | -1.091600625 | 0.275385868 | 0.363287973 | no |
| DCAF8L1   | 0.041295042  | 1.091151145  | 0.275583428 | 0.363501272 | no |
| NMD3      | 0.041295034  | 1.091150949  | 0.275583514 | 0.363501272 | no |
| TALD01    | -0.041280014 | -1.09075338  | 0.275758339 | 0.363708142 | no |
| C7orf45   | 0.041273528  | 1.090581708  | 0.275833853 | 0.36378369  | no |
| LOC284788 | 0.041272003  | 1.090541355  | 0.275851605 | 0.36378369  | no |
| C1orf100  | 0.041268722  | 1.090454502  | 0.275889816 | 0.363810351 | no |
| SLC35F4   | 0.041261265  | 1.09025713   | 0.275976664 | 0.363901141 | no |
| ANGPTL3   | -0.041249284 | -1.089940003 | 0.276116246 | 0.364061449 | no |
| RPLP0     | -0.041225586 | -1.089312776 | 0.276392458 | 0.364401872 | no |
| LOC285796 | -0.041219779 | -1.089159057 | 0.27646018  | 0.364447325 | no |
| RPL36AL   | -0.041219538 | -1.089152691 | 0.276462985 | 0.364447325 | no |
| RRP15     | -0.041206758 | -1.088814417 | 0.276612055 | 0.364620063 | no |
| EXOC8     | -0.041201429 | -1.088673368 | 0.276674229 | 0.364678242 | no |
| COMMD4    | 0.041194895  | 1.088500433  | 0.27675047  | 0.364754955 | no |
| PLIN5     | -0.041187772 | -1.088311904 | 0.276833603 | 0.36484074  | no |
| OR1C1     | -0.041160992 | -1.087603086 | 0.277146313 | 0.365229055 | no |
| SLC25A25  | -0.041128815 | -1.086751429 | 0.277522359 | 0.365700779 | no |
| C10orf99  | -0.041095265 | -1.085863442 | 0.277914816 | 0.366194067 | no |
| MBD3L5    | -0.041086558 | -1.085632974 | 0.278016737 | 0.366304489 | no |
| LOC126536 | 0.041073057  | 1.085275623  | 0.278174819 | 0.366488889 | no |
| SIAH3     | -0.041054312 | -1.084779492 | 0.278394395 | 0.366731038 | no |
| BCL2L11   | 0.041054269  | 1.084778365  | 0.278394894 | 0.366731038 | no |
| DUOXA2    | 0.041049832  | 1.08466092   | 0.27844689  | 0.366759972 | no |
| UGGT2     | 0.041049299  | 1.084646805  | 0.27845314  | 0.366759972 | no |

|           |              |              |             |             |    |
|-----------|--------------|--------------|-------------|-------------|----|
| PLA2G1B   | 0.041029829  | 1.084131482  | 0.278681368 | 0.367036668 | no |
| LECT2     | 0.041011387  | 1.083643385  | 0.278897656 | 0.367297603 | no |
| NFASC     | 0.041008678  | 1.083571666  | 0.278929446 | 0.367309551 | no |
| C19orf44  | 0.041007517  | 1.083540947  | 0.278943063 | 0.367309551 | no |
| UBE2G1    | -0.041000535 | -1.083356143 | 0.279024993 | 0.367393508 | no |
| CPO       | 0.040983226  | 1.082898029  | 0.279228162 | 0.367637079 | no |
| RIPK2     | -0.040952616 | -1.082087851 | 0.279587715 | 0.368086502 | no |
| ZSCAN12   | -0.040946724 | -1.081931921 | 0.279656952 | 0.368153682 | no |
| PCDHB3    | -0.040943307 | -1.081841474 | 0.279697118 | 0.368182586 | no |
| FANCM     | -0.040919898 | -1.081221893 | 0.279972371 | 0.368510565 | no |
| CLEC4M    | -0.040919017 | -1.081198589 | 0.279982728 | 0.368510565 | no |
| IRF2BP2   | -0.040913433 | -1.081050785 | 0.280048419 | 0.368573033 | no |
| SUMO1     | 0.040875891  | 1.080057163  | 0.280490309 | 0.369130577 | no |
| CCDC77    | 0.040859571  | 1.07962522   | 0.280682553 | 0.369359532 | no |
| PTPRVP    | -0.040855837 | -1.079526398 | 0.280726548 | 0.369393384 | no |
| GFM2      | 0.040851057  | 1.079399887  | 0.280782877 | 0.36944346  | no |
| RDH12     | 0.040847608  | 1.07930859   | 0.280823532 | 0.369472907 | no |
| PECI      | 0.04083463   | 1.07896512   | 0.280976516 | 0.36965013  | no |
| NUAK1     | -0.040826458 | -1.078748832 | 0.281072881 | 0.369752847 | no |
| C2orf24   | 0.040823977  | 1.078683164  | 0.281102143 | 0.369767283 | no |
| HOXA11    | 0.040806428  | 1.078218683  | 0.28130918  | 0.370015548 | no |
| PIGM      | -0.040803741 | -1.078147581 | 0.281340881 | 0.370033173 | no |
| TMC5      | 0.040794367  | 1.077899488  | 0.281451516 | 0.370154606 | no |
| CALB1     | -0.040787527 | -1.077718444 | 0.28153227  | 0.370236727 | no |
| KRTAP13-1 | -0.04076085  | -1.077012386 | 0.281847355 | 0.37062698  | no |
| TRPV3     | -0.04074433  | -1.076575165 | 0.282042588 | 0.370859589 | no |
| OR1Q1     | 0.040739834  | 1.076456155  | 0.282095746 | 0.370905365 | no |
| MRPL3     | 0.040729898  | 1.076193191  | 0.282213227 | 0.371035702 | no |
| C6orf225  | -0.040723071 | -1.076012509 | 0.282293968 | 0.371117722 | no |
| TRIP11    | 0.040719183  | 1.075909598  | 0.282339962 | 0.371154054 | no |
| SMEK1     | -0.040678844 | -1.074841984 | 0.282817415 | 0.371757526 | no |
| KRTAP9-4  | -0.040674027 | -1.074714496 | 0.282874466 | 0.371808345 | no |
| RNF139    | -0.040668844 | -1.074577309 | 0.282935866 | 0.371864873 | no |
| PCYOX1L   | 0.040660968  | 1.074368857  | 0.28302918  | 0.371963336 | no |
| SNORA1    | 0.040640534  | 1.073828055  | 0.283271367 | 0.372257426 | no |
| SNORD10   | 0.04062349   | 1.073376958  | 0.283473488 | 0.372498829 | no |
| CASQ2     | 0.040618963  | 1.073257132  | 0.283527195 | 0.37254519  | no |
| STIM2     | 0.040584838  | 1.072353978  | 0.283932215 | 0.373053128 | no |
| RPL27A    | -0.040579736 | -1.072218951 | 0.283992802 | 0.373108485 | no |
| MIA2      | 0.040562498  | 1.071762723  | 0.284197576 | 0.373353255 | no |
| POLE      | -0.040556616 | -1.071607072 | 0.284267462 | 0.37340546  | no |
| SNX1      | -0.040556045 | -1.071591949 | 0.284274253 | 0.37340546  | no |
| CCDC84    | -0.040538752 | -1.071134267 | 0.284479818 | 0.373651203 | no |
| FGF21     | 0.040533893  | 1.071005679  | 0.284537591 | 0.373702807 | no |
| GNB3      | -0.040507735 | -1.070313382 | 0.284848767 | 0.374087195 | no |
| OTP       | 0.040490048  | 1.069845274  | 0.285059305 | 0.374339375 | no |
| NPHP4     | -0.040476422 | -1.069484647 | 0.285221573 | 0.374515862 | no |
| KCNK2     | -0.040474755 | -1.06944053  | 0.285241428 | 0.374515862 | no |
| MUDENG    | -0.040474096 | -1.069423104 | 0.285249271 | 0.374515862 | no |
| CSN2      | 0.040469499  | 1.069301427  | 0.285304039 | 0.374563445 | no |
| RTTN      | 0.040459459  | 1.069035717  | 0.285423662 | 0.374683984 | no |

|          |              |              |             |             |    |
|----------|--------------|--------------|-------------|-------------|----|
| ISM1     | -0.040458682 | -1.069015161 | 0.285432917 | 0.374683984 | no |
| JMJD8    | 0.040452931  | 1.068862944  | 0.285501462 | 0.374749631 | no |
| TTPAL    | 0.040436985  | 1.068440938  | 0.285691554 | 0.374974802 | no |
| TDGF1    | -0.040425738 | -1.068143254 | 0.285825698 | 0.375126514 | no |
| C4orf31  | 0.04041889   | 1.06796203   | 0.285907382 | 0.375209363 | no |
| SARS2    | -0.040397948 | -1.067407786 | 0.286157299 | 0.375498056 | no |
| IQCB1    | 0.040397344  | 1.067391801  | 0.286164509 | 0.375498056 | no |
| OR2H1    | 0.040394491  | 1.067316294  | 0.286198568 | 0.375518376 | no |
| DHX35    | -0.040384933 | -1.067063334 | 0.286312692 | 0.375643738 | no |
| SLC25A15 | -0.040380302 | -1.066940786 | 0.286367991 | 0.375691911 | no |
| ADRA2B   | 0.040361854  | 1.066452533  | 0.286588384 | 0.375956653 | no |
| TOP2A    | 0.040355002  | 1.066271196  | 0.286670267 | 0.376039671 | no |
| ZNF680   | -0.040352905 | -1.066215713 | 0.286695323 | 0.376048141 | no |
| TMEM174  | 0.040345884  | 1.066029903  | 0.286779248 | 0.376133819 | no |
| C19orf33 | 0.040336474  | 1.065780849  | 0.286891763 | 0.376256984 | no |
| ACOT2    | -0.040321005 | -1.065371461 | 0.287076778 | 0.376475209 | no |
| FAM99A   | -0.04031166  | -1.065124136 | 0.28718859  | 0.376597413 | no |
| LOH12CR1 | 0.040305319  | 1.064956334  | 0.287264468 | 0.376672483 | no |
| ATG12    | 0.040276292  | 1.064188113  | 0.287612021 | 0.377103752 | no |
| LETM2    | -0.040260864 | -1.06377981  | 0.287796859 | 0.377321633 | no |
| THAP8    | -0.040245159 | -1.063364181 | 0.287985095 | 0.377521606 | no |
| C11orf59 | 0.040245022  | 1.063360569  | 0.287986731 | 0.377521606 | no |
| VN1R5    | -0.04024213  | -1.063284033 | 0.288021404 | 0.377542579 | no |
| SLC12A2  | -0.040240101 | -1.063230326 | 0.288045735 | 0.377549995 | no |
| STEAP2   | -0.040218791 | -1.062666353 | 0.288301325 | 0.377860508 | no |
| SPOPL    | 0.040197025  | 1.062090318  | 0.28856254  | 0.378178351 | no |
| QRFP     | 0.040187368  | 1.06183475   | 0.288678483 | 0.37830578  | no |
| MYO3A    | 0.040173994  | 1.061480808  | 0.288839108 | 0.378491742 | no |
| PRSS53   | -0.040161434 | -1.061148424 | 0.288990004 | 0.378664932 | no |
| KRTAP9-2 | 0.040155473  | 1.060990649  | 0.28906165  | 0.378734265 | no |
| GSTP1    | 0.040141751  | 1.060627502  | 0.289226601 | 0.378891633 | no |
| VPS45    | -0.040141064 | -1.060609323 | 0.28923486  | 0.378891633 | no |
| SLC01B3  | 0.040140804  | 1.060602458  | 0.289237979 | 0.378891633 | no |
| ZFP30    | -0.040118681 | -1.060016978 | 0.28950406  | 0.379215619 | no |
| C6orf122 | 0.040105056  | 1.059656387  | 0.289668018 | 0.379405804 | no |
| PODN     | -0.040099058 | -1.059497652 | 0.289740214 | 0.379475783 | no |
| PARK7    | 0.040068362  | 1.058685298  | 0.290109879 | 0.379935324 | no |
| GATAD2A  | 0.040065502  | 1.058609603  | 0.29014434  | 0.379955843 | no |
| FOLR1    | 0.040049734  | 1.058192322  | 0.290334364 | 0.380180063 | no |
| C11orf93 | -0.040004658 | -1.0569994   | 0.290878067 | 0.38086735  | no |
| OR10C1   | 0.039987826  | 1.056553954  | 0.291081266 | 0.381108731 | no |
| SEL1L    | 0.039968117  | 1.056032394  | 0.291319307 | 0.381379646 | no |
| BCORL1   | 0.039967571  | 1.056017929  | 0.29132591  | 0.381379646 | no |
| TMEM199  | 0.039964985  | 1.055949488  | 0.291357157 | 0.381395856 | no |
| TACR3    | -0.039946648 | -1.055464214 | 0.291578774 | 0.381661249 | no |
| OAZ2     | 0.039944342  | 1.055403194  | 0.291606649 | 0.381673026 | no |
| DMBX1    | 0.039942596  | 1.055356986  | 0.291627759 | 0.381675947 | no |
| BMS1P4   | 0.039939445  | 1.055273613  | 0.29166585  | 0.381701091 | no |
| NIPAL3   | 0.039913571  | 1.054588863  | 0.291978821 | 0.382047775 | no |
| C2orf7   | 0.039913307  | 1.054581888  | 0.29198201  | 0.382047775 | no |
| KLF14    | 0.039912858  | 1.054569996  | 0.291987447 | 0.382047775 | no |



|            |              |              |             |             |    |
|------------|--------------|--------------|-------------|-------------|----|
| RAPGEF5    | -0.03990775  | -1.054434831 | 0.292049254 | 0.382103916 | no |
| TP73       | 0.039905901  | 1.054385891  | 0.292071634 | 0.38210847  | no |
| SNAR-B2    | -0.03988758  | -1.053901043 | 0.292293422 | 0.382373886 | no |
| RPL35A     | 0.039871907  | 1.053486287  | 0.292483237 | 0.382597444 | no |
| TTC24      | 0.039856688  | 1.053083522  | 0.292667644 | 0.382813899 | no |
| PPBPL2     | -0.039854188 | -1.05301736  | 0.292697944 | 0.382828764 | no |
| C19orf41   | 0.03983263   | 1.052446871  | 0.292959296 | 0.383145808 | no |
| UCKL1      | -0.039827941 | -1.052322783 | 0.293016164 | 0.383195394 | no |
| TMEM40     | 0.039819821  | 1.052107896  | 0.293114661 | 0.383299413 | no |
| SPACA1     | 0.039817757  | 1.052053279  | 0.293139699 | 0.383307363 | no |
| C1orf124   | 0.039797349  | 1.051513205  | 0.293387364 | 0.383606398 | no |
| NCRNA00028 | 0.039794819  | 1.051446252  | 0.293418078 | 0.383613643 | no |
| FAM58B     | 0.039793767  | 1.051418402  | 0.293430853 | 0.383613643 | no |
| ANTXR1     | -0.03978395  | -1.051158618 | 0.293550046 | 0.383744655 | no |
| NXT2       | 0.039746992  | 1.050180567  | 0.293999083 | 0.384306811 | no |
| PDE4C      | -0.039744519 | -1.050115146 | 0.294029135 | 0.384321247 | no |
| TRPC4      | 0.039740221  | 1.050001393  | 0.294081394 | 0.384364705 | no |
| PSG9       | -0.039719929 | -1.049464403 | 0.294328176 | 0.384662383 | no |
| NDUFAF3    | 0.039717597  | 1.049402693  | 0.294356544 | 0.384674592 | no |
| METTL1     | 0.039703984  | 1.049042434  | 0.294522196 | 0.384866194 | no |
| ZNF587     | 0.039664316  | 1.047992707  | 0.295005229 | 0.385472482 | no |
| DRG1       | -0.039658528 | -1.047839535 | 0.295075756 | 0.38553972  | no |
| NUDT6      | 0.039652384  | 1.047676933  | 0.295150637 | 0.385612638 | no |
| LOC339524  | 0.039650177  | 1.047618521  | 0.29517754  | 0.385622867 | no |
| ACTA1      | -0.039646053 | -1.04750939  | 0.295227807 | 0.385663617 | no |
| PHKG2      | -0.039585419 | -1.045904832 | 0.295967548 | 0.38660498  | no |
| ZNF705D    | 0.039577157  | 1.045686197  | 0.29606844  | 0.386711785 | no |
| LRRC56     | -0.039571699 | -1.045541771 | 0.296135101 | 0.386770239 | no |
| C14orf183  | -0.03957036  | -1.045506347 | 0.296151452 | 0.386770239 | no |
| ZNF543     | -0.039567713 | -1.045436288 | 0.296183793 | 0.38678749  | no |
| EBPL       | -0.039552875 | -1.045043638 | 0.296365092 | 0.386999253 | no |
| GNB1L      | -0.039551289 | -1.045001674 | 0.296384473 | 0.386999566 | no |
| GFI1B      | -0.039545648 | -1.04485238  | 0.296453429 | 0.387064607 | no |
| PPP1R13L   | 0.039508265  | 1.043863129  | 0.29691062  | 0.387636505 | no |
| FOLH1B     | 0.039497868  | 1.043587998  | 0.297037858 | 0.387775258 | no |
| MSLNL      | -0.039496447 | -1.043550382 | 0.297055257 | 0.387775258 | no |
| NKX3-2     | 0.039475825  | 1.043004676  | 0.297307744 | 0.388079797 | no |
| PADI3      | 0.039466276  | 1.042752002  | 0.2974247   | 0.388207398 | no |
| ENTPD8     | 0.039459875  | 1.042582598  | 0.29750313  | 0.388284699 | no |
| ZNF490     | -0.039454066 | -1.042428883 | 0.297574308 | 0.388352528 | no |
| C17orf76   | 0.039441453  | 1.042095103  | 0.297728905 | 0.388529207 | no |
| HIST1H2AK  | 0.0394322    | 1.041850241  | 0.297842352 | 0.388652167 | no |
| UFSP2      | -0.039428497 | -1.041752276 | 0.297887748 | 0.388686318 | no |
| LPCAT1     | 0.039420172  | 1.041531964  | 0.297989856 | 0.388794457 | no |
| BHLHA15    | -0.039417161 | -1.041452296 | 0.298026786 | 0.388817549 | no |
| RMST       | 0.039404533  | 1.041118115  | 0.298181726 | 0.388994588 | no |
| GAPVD1     | -0.039392521 | -1.040800252 | 0.29832915  | 0.389161801 | no |
| NDUFB11    | -0.039386846 | -1.040650091 | 0.298398812 | 0.38922756  | no |
| IPO8       | 0.039381387  | 1.040505626  | 0.298465841 | 0.389289876 | no |
| HCG27      | 0.039378566  | 1.040430962  | 0.298500488 | 0.38930729  | no |
| ZNF189     | -0.039377164 | -1.040393866 | 0.298517703 | 0.38930729  | no |

|              |              |              |             |             |    |
|--------------|--------------|--------------|-------------|-------------|----|
| OR2S2        | -0.039371021 | -1.040231309 | 0.298593147 | 0.389380563 | no |
| MTNR1A       | -0.039360243 | -1.039946104 | 0.298725545 | 0.389528092 | no |
| C10orf129    | 0.039355104  | 1.039810124  | 0.298788683 | 0.389581197 | no |
| KLHL13       | -0.039353792 | -1.039775399 | 0.298804808 | 0.389581197 | no |
| C12orf36     | -0.039325527 | -1.039027448 | 0.299152269 | 0.390009065 | no |
| OR4X2        | -0.039294643 | -1.038210175 | 0.299532244 | 0.390479264 | no |
| LOC285074    | -0.039285614 | -1.037971257 | 0.299643384 | 0.390598965 | no |
| ZNF614       | -0.039280493 | -1.037835742 | 0.299706436 | 0.39063821  | no |
| GLTSCR1      | -0.039279698 | -1.037814705 | 0.299716224 | 0.39063821  | no |
| LOC91450     | -0.039278461 | -1.037781976 | 0.299731454 | 0.39063821  | no |
| SPACA4       | -0.039254587 | -1.037150238 | 0.300025519 | 0.390996258 | no |
| TINAG        | 0.039248059  | 1.036977492  | 0.300105963 | 0.391075886 | no |
| MTMR10       | -0.039226081 | -1.036395902 | 0.300376904 | 0.391403728 | no |
| SNORA26      | 0.039222082  | 1.036290077  | 0.300426221 | 0.391442762 | no |
| AURKB        | 0.039218766  | 1.03620233   | 0.300467118 | 0.391470821 | no |
| SLC25A38     | -0.039214579 | -1.03609154  | 0.30051876  | 0.391512873 | no |
| LOC254312    | 0.039207875  | 1.035914141  | 0.300601462 | 0.391595384 | no |
| TSPAN13      | 0.039203274  | 1.035792389  | 0.30065823  | 0.391644101 | no |
| HIST1H1D     | 0.039192011  | 1.035494344  | 0.300797228 | 0.39179992  | no |
| RPL31P11     | 0.03917288   | 1.034988128  | 0.301033408 | 0.392082294 | no |
| C4orf11      | -0.03914298  | -1.034196919 | 0.301402803 | 0.392538126 | no |
| ZNF232       | -0.039139636 | -1.034108414 | 0.301444142 | 0.392566677 | no |
| SHARPIN      | -0.039119244 | -1.033568826 | 0.301696258 | 0.392869698 | no |
| PRELP        | 0.039098277  | 1.033014017  | 0.301955632 | 0.393182132 | no |
| WAPAL        | -0.039091574 | -1.032836624 | 0.302038595 | 0.393264832 | no |
| ZNF883       | -0.039048512 | -1.031697164 | 0.302571858 | 0.39393379  | no |
| MYOCD        | 0.038999233  | 1.030393166  | 0.303182894 | 0.394703912 | no |
| LILRA4       | 0.038987285  | 1.03007702   | 0.30333116  | 0.394849527 | no |
| INF2         | -0.038987072 | -1.030071381 | 0.303333804 | 0.394849527 | no |
| MRPL48       | -0.038962187 | -1.029412911 | 0.303642769 | 0.395226261 | no |
| SARS         | -0.038958089 | -1.029304455 | 0.303693679 | 0.395267078 | no |
| MCCC1        | -0.038948622 | -1.029053957 | 0.303811285 | 0.395394693 | no |
| ROB03        | -0.038946544 | -1.028998967 | 0.303837106 | 0.395402845 | no |
| SLC9A7       | -0.038942238 | -1.028885041 | 0.303890606 | 0.395436319 | no |
| SNORD97      | 0.038941326  | 1.028860895  | 0.303901945 | 0.395436319 | no |
| SNX29        | 0.038928474  | 1.028520815  | 0.30406169  | 0.395618717 | no |
| FXYP3        | 0.038892557  | 1.027570426  | 0.304508407 | 0.396174451 | no |
| LCE5A        | -0.038851855 | -1.026493438 | 0.305015157 | 0.396808213 | no |
| NCAPH        | 0.038827342  | 1.0258448    | 0.305320628 | 0.397180058 | no |
| C1orf172     | -0.038824938 | -1.025781187 | 0.305350597 | 0.397193487 | no |
| ZFP57        | 0.038806567  | 1.025295087  | 0.305579671 | 0.39745796  | no |
| BCAR4        | -0.03880548  | -1.025266314 | 0.305593233 | 0.39745796  | no |
| LOC729609    | 0.038796811  | 1.025036942  | 0.305701367 | 0.397573024 | no |
| C20orf185    | 0.038767689  | 1.024266337  | 0.306064843 | 0.398020132 | no |
| ADAMTS10     | -0.038763747 | -1.02416204  | 0.306114059 | 0.398058532 | no |
| LOC100133050 | -0.038746269 | -1.023699575 | 0.306332354 | 0.398316775 | no |
| C19orf42     | 0.038739953  | 1.023532437  | 0.306411273 | 0.398393769 | no |
| NFATC2IP     | -0.038736938 | -1.023452656 | 0.306448948 | 0.398417133 | no |
| MPHOSPH9     | 0.038723518  | 1.023097563  | 0.306616673 | 0.398609561 | no |
| GOT1L1       | 0.0387186    | 1.022967437  | 0.306678152 | 0.398663851 | no |
| XKR6         | -0.038716138 | -1.022902288 | 0.306708936 | 0.398678235 | no |

|              |              |              |             |             |    |
|--------------|--------------|--------------|-------------|-------------|----|
| TEKT4        | 0.03871117   | 1.022770842  | 0.306771051 | 0.39873334  | no |
| AP2M1        | 0.038707231  | 1.02266662   | 0.306820307 | 0.398771726 | no |
| MLLT10       | 0.038700493  | 1.022488334  | 0.306904579 | 0.398855614 | no |
| TMEM105      | -0.038695868 | -1.022365937 | 0.306962442 | 0.398905172 | no |
| DKFZp566F094 | -0.038644888 | -1.021016999 | 0.307600634 | 0.399708825 | no |
| TRIM24       | -0.038608474 | -1.020053497 | 0.308057011 | 0.400276135 | no |
| MRPL16       | 0.03859546   | 1.019709159  | 0.308220221 | 0.400462466 | no |
| VWC2         | -0.038585338 | -1.019441321 | 0.308347211 | 0.400601717 | no |
| GDEP         | -0.038570842 | -1.01905776  | 0.308529129 | 0.400812307 | no |
| KDM1B        | -0.038548015 | -1.018453766 | 0.30881574  | 0.401158868 | no |
| EMD          | 0.038537861  | 1.018185095  | 0.308943288 | 0.401298772 | no |
| TSPAN8       | -0.038532725 | -1.018049194 | 0.309007818 | 0.401338324 | no |
| DCAF10       | -0.038532278 | -1.018037359 | 0.309013438 | 0.401338324 | no |
| RPL18        | -0.038526788 | -1.017892107 | 0.309082419 | 0.40140213  | no |
| RPS15        | -0.038497842 | -1.017126203 | 0.309446322 | 0.401848914 | no |
| GTF2IRD2     | -0.038483438 | -1.01674507  | 0.309627515 | 0.402058388 | no |
| PCDHB15      | -0.038466427 | -1.01629497  | 0.309841586 | 0.402283834 | no |
| GRPEL1       | 0.038465616  | 1.016273524  | 0.309851788 | 0.402283834 | no |
| PI16         | 0.038464898  | 1.016254528  | 0.309860825 | 0.402283834 | no |
| COX6A2       | 0.038462939  | 1.016202679  | 0.309885492 | 0.402290026 | no |
| HOXB8        | 0.03845403   | 1.015966973  | 0.309997644 | 0.402409783 | no |
| SLC26A10     | -0.038451424 | -1.015898001 | 0.310030468 | 0.402426553 | no |
| HIST1H2AL    | 0.038444569  | 1.015716627  | 0.310116793 | 0.402512764 | no |
| OR51I2       | 0.038440607  | 1.015611804  | 0.310166691 | 0.402551685 | no |
| TNNT1        | -0.03843661  | -1.015506037 | 0.310217043 | 0.402591192 | no |
| OR6C2        | 0.038425788  | 1.01521969   | 0.310353392 | 0.40274229  | no |
| C10orf25     | -0.038424111 | -1.015175335 | 0.310374516 | 0.402743852 | no |
| WDR8         | 0.038380601  | 1.014024081  | 0.310923129 | 0.403415312 | no |
| C1D          | 0.038379907  | 1.014005722  | 0.310931883 | 0.403415312 | no |
| LOC100128788 | -0.038366289 | -1.013645395 | 0.311103725 | 0.403612366 | no |
| IL1F10       | 0.038350662  | 1.013231917  | 0.311300994 | 0.403842381 | no |
| MEGF9        | -0.038346487 | -1.013121448 | 0.311353713 | 0.403884856 | no |
| USH2A        | 0.038331991  | 1.012737903  | 0.311536795 | 0.404096421 | no |
| LOC100271722 | -0.038327456 | -1.012617916 | 0.311594084 | 0.404132018 | no |
| CNTN5        | -0.038326654 | -1.012596699 | 0.311604215 | 0.404132018 | no |
| RPS4Y1       | 0.038321174  | 1.012451709  | 0.311673454 | 0.404195888 | no |
| YWHAQ        | 0.038317616  | 1.01235756   | 0.311718419 | 0.404203202 | no |
| GALNT11      | -0.038317564 | -1.01235618  | 0.311719078 | 0.404203202 | no |
| CDKN1C       | -0.038306609 | -1.012066316 | 0.311857543 | 0.404356814 | no |
| SNORA45      | 0.0383018    | 1.011939078  | 0.311918336 | 0.404409704 | no |
| CHD1L        | 0.038297224  | 1.011818001  | 0.311976193 | 0.404458779 | no |
| DYNLRB1      | -0.0382867   | -1.011539559 | 0.312109273 | 0.404605366 | no |
| ITGB1BP3     | -0.038243602 | -1.010399234 | 0.31265468  | 0.405286421 | no |
| PHOSPHO1     | 0.038233437  | 1.010130276  | 0.312783411 | 0.405427298 | no |
| GPR32        | -0.038230394 | -1.010049772 | 0.31282195  | 0.405451258 | no |
| FBX05        | 0.038214665  | 1.009633595  | 0.31302123  | 0.405667603 | no |
| HNRPLL       | 0.038214052  | 1.009617376  | 0.313028998 | 0.405667603 | no |
| DISC1        | -0.038210681 | -1.00952817  | 0.313071724 | 0.405673634 | no |
| TRAF3        | 0.038210518  | 1.009523875  | 0.313073781 | 0.405673634 | no |
| ZNF268       | 0.038201264  | 1.009279026  | 0.313191076 | 0.40578887  | no |
| TRDN         | 0.038200335  | 1.009254441  | 0.313202855 | 0.40578887  | no |

|              |              |              |             |             |    |
|--------------|--------------|--------------|-------------|-------------|----|
| MAPK4        | 0.038198217  | 1.009198403  | 0.313229705 | 0.405797653 | no |
| PPP2CA       | -0.038194127 | -1.00909017  | 0.313281567 | 0.405838836 | no |
| PIGU         | 0.038190746  | 1.009000715  | 0.313324436 | 0.405868365 | no |
| GAGE4        | 0.038173346  | 1.00854035   | 0.313545113 | 0.406128201 | no |
| AMAC1L2      | -0.038168511 | -1.008412428 | 0.313606451 | 0.406181629 | no |
| PRSS38       | 0.038154421  | 1.008039618  | 0.313785257 | 0.406387184 | no |
| ZNF223       | 0.038149313  | 1.00790446   | 0.313850098 | 0.406445124 | no |
| OBFC2B       | -0.038143644 | -1.007754466 | 0.313922066 | 0.406512287 | no |
| ZNF833       | -0.038137574 | -1.007593871 | 0.313999133 | 0.406586042 | no |
| EIF3M        | 0.038128668  | 1.007358222  | 0.314111224 | 0.406686968 | no |
| GPR116       | 0.038128269  | 1.007347668  | 0.314117306 | 0.406686968 | no |
| CBX8         | -0.038120911 | -1.00715299  | 0.314210769 | 0.406781925 | no |
| ESPL1        | 0.038108393  | 1.006821792  | 0.314369815 | 0.40696177  | no |
| ATP5J        | 0.038105604  | 1.006747993  | 0.314405262 | 0.406981598 | no |
| ADAM5P       | 0.038068221  | 1.005758916  | 0.314880583 | 0.407568943 | no |
| SPINK7       | -0.038066748 | -1.005719945 | 0.314899321 | 0.407568943 | no |
| MCM4         | 0.038062986  | 1.005620398  | 0.314947188 | 0.407604804 | no |
| GDI2         | 0.038054868  | 1.005405606  | 0.315050488 | 0.407706801 | no |
| SNORA70      | 0.038053623  | 1.005372669  | 0.31506633  | 0.407706801 | no |
| CDHR2        | -0.038050319 | -1.005285243 | 0.315108383 | 0.407735123 | no |
| FAM170A      | 0.038038197  | 1.004964534  | 0.315262681 | 0.407908671 | no |
| SCGBL        | -0.03801733  | -1.00441243  | 0.315528425 | 0.408226383 | no |
| CA1          | 0.037978508  | 1.003385276  | 0.316023214 | 0.408833966 | no |
| LOC100132354 | -0.037977311 | -1.003353594 | 0.316038483 | 0.408833966 | no |
| FAM27B       | 0.037965504  | 1.003041199  | 0.316189073 | 0.409002602 | no |
| USP17        | -0.037961186 | -1.002926962 | 0.316244152 | 0.409047679 | no |
| LPAR4        | 0.037938697  | 1.00233196   | 0.316531135 | 0.409392688 | no |
| NKX2-8       | -0.037935396 | -1.002244609 | 0.316573281 | 0.409421007 | no |
| CHORDC1      | -0.03793377  | -1.002201595 | 0.316594037 | 0.40942166  | no |
| RPL8         | -0.037926697 | -1.002014449 | 0.316684349 | 0.409512258 | no |
| INTS6        | -0.037921077 | -1.001865772 | 0.316756108 | 0.409542315 | no |
| PTPRF        | -0.037920998 | -1.001863664 | 0.316757126 | 0.409542315 | no |
| FDX1L        | -0.037920118 | -1.001840388 | 0.316768361 | 0.409542315 | no |
| CENPF        | 0.037910238  | 1.00157899   | 0.316894556 | 0.409679271 | no |
| GALR1        | 0.037908328  | 1.001528452  | 0.316918958 | 0.409684622 | no |
| KPNB1        | 0.037871977  | 1.000566686  | 0.317383575 | 0.410244449 | no |
| IPPK         | -0.037871271 | -1.000548005 | 0.317392604 | 0.410244449 | no |
| MRPS24       | 0.037863414  | 1.000340139  | 0.317493082 | 0.410348088 | no |
| SEH1L        | -0.037845074 | -0.999854893 | 0.317727722 | 0.410603799 | no |
| OR11H1       | -0.03784416  | -0.999830726 | 0.31773941  | 0.410603799 | no |
| BTC          | 0.037843188  | 0.999804994  | 0.317751857 | 0.410603799 | no |
| DEFB103B     | -0.037831754 | -0.999502488 | 0.317898197 | 0.410766649 | no |
| ACAD11       | -0.037826798 | -0.999371375 | 0.317961639 | 0.410822368 | no |
| DAK          | -0.037824432 | -0.999308758 | 0.31799194  | 0.410835263 | no |
| PRR19        | -0.03781159  | -0.998968985 | 0.318156394 | 0.411021468 | no |
| PDC          | 0.037807043  | 0.998848697  | 0.318214628 | 0.411070433 | no |
| OSBPL6       | 0.037803482  | 0.998754482  | 0.318260244 | 0.411103093 | no |
| C10orf140    | 0.0378008    | 0.998683508  | 0.318294611 | 0.411121219 | no |
| AGBL1        | -0.037790033 | -0.998398665 | 0.31843256  | 0.411273125 | no |
| HAUS4        | 0.037746868  | 0.997256621  | 0.318986046 | 0.411961666 | no |
| ENPP2        | 0.037723113  | 0.99662813   | 0.319290911 | 0.412329051 | no |

|             |              |              |             |             |    |
|-------------|--------------|--------------|-------------|-------------|----|
| C14orf64    | -0.037709343 | -0.996263804 | 0.319467723 | 0.412531035 | no |
| MAGEA5      | 0.037697139  | 0.995940934  | 0.319624469 | 0.412707084 | no |
| RNF168      | -0.037662345 | -0.995020389 | 0.320071652 | 0.413258104 | no |
| FIBCD1      | -0.037654358 | -0.994809073 | 0.320174363 | 0.413364321 | no |
| CAMK1       | 0.037650209  | 0.994699309  | 0.320227722 | 0.413399063 | no |
| PMCH        | 0.037649086  | 0.994669599  | 0.320242166 | 0.413399063 | no |
| ZFX         | 0.037644614  | 0.99455128   | 0.320299693 | 0.413446925 | no |
| DUOX2       | 0.037624504  | 0.994019227  | 0.320558462 | 0.413739161 | no |
| TIMM16      | -0.037623839 | -0.99400164  | 0.320567017 | 0.413739161 | no |
| RMRP        | 0.037616398  | 0.993804775  | 0.320662801 | 0.413836366 | no |
| RAD54L2     | -0.037589364 | -0.993089524 | 0.321010959 | 0.414259243 | no |
| ART4        | 0.037581442  | 0.992879931  | 0.321113028 | 0.414364514 | no |
| ADCY6       | -0.037544227 | -0.991895366 | 0.321592783 | 0.414957105 | no |
| SPANXN3     | -0.037539921 | -0.991781421 | 0.321648336 | 0.4150023   | no |
| MGC26647    | -0.037516701 | -0.991167112 | 0.321947944 | 0.415344989 | no |
| SSX1        | 0.037515062  | 0.991123756  | 0.321969097 | 0.415344989 | no |
| CCND1       | -0.037514561 | -0.991110495 | 0.321975567 | 0.415344989 | no |
| YES1        | -0.037504817 | -0.990852697 | 0.322101361 | 0.415480752 | no |
| SUV39H1     | -0.037502814 | -0.990799697 | 0.322127226 | 0.415487608 | no |
| CDH17       | 0.037497932  | 0.990670558  | 0.322190256 | 0.415542396 | no |
| KCNJ16      | -0.037490906 | -0.990484661 | 0.322281002 | 0.41563292  | no |
| TMPRSS11BNL | 0.03747722   | 0.990122588  | 0.322457796 | 0.4158344   | no |
| SFRS17A     | -0.037466063 | -0.989827405 | 0.322601976 | 0.415993797 | no |
| MRGPRX3     | 0.037450298  | 0.989410324  | 0.322805768 | 0.416230039 | no |
| RCAN2       | 0.037441988  | 0.989190476  | 0.322913223 | 0.41634204  | no |
| DNAH7       | -0.037434271 | -0.988986289 | 0.323013044 | 0.416444186 | no |
| ANKRD40     | -0.037423771 | -0.98870851  | 0.323148874 | 0.41659274  | no |
| CD82        | -0.037412569 | -0.988412138 | 0.323293838 | 0.416753048 | no |
| ZFP112      | -0.037398109 | -0.988029576 | 0.323481022 | 0.416967759 | no |
| FCRLB       | 0.037384897  | 0.987680042  | 0.323652107 | 0.417152583 | no |
| PPM1G       | 0.037383849  | 0.987652332  | 0.323665673 | 0.417152583 | no |
| CCDC22      | -0.037376143 | -0.987448463 | 0.32376549  | 0.417254633 | no |
| KCNK9       | -0.037360813 | -0.987042892 | 0.323964124 | 0.417484011 | no |
| TRIB3       | 0.03734747   | 0.986689877  | 0.324137082 | 0.417680275 | no |
| TMSB15A     | -0.037338368 | -0.986449061 | 0.324255103 | 0.417805728 | no |
| PRSS48      | -0.037335557 | -0.986374691 | 0.324291557 | 0.41782607  | no |
| FLJ37307    | -0.037331805 | -0.986275433 | 0.324340214 | 0.417862132 | no |
| ACAA1       | 0.037325255  | 0.98610215   | 0.32442517  | 0.417944952 | no |
| POTEB       | -0.037314446 | -0.985816199 | 0.324565396 | 0.418071652 | no |
| GADD45GIP1  | -0.037313367 | -0.985787634 | 0.324579405 | 0.418071652 | no |
| SNORA11B    | 0.037312893  | 0.985775099  | 0.324585554 | 0.418071652 | no |
| ESRRA       | -0.037311217 | -0.985730768 | 0.324607297 | 0.418073024 | no |
| USP33       | 0.037307735  | 0.985638633  | 0.324652491 | 0.418104597 | no |
| HIST1H4K    | 0.037295963  | 0.985327193  | 0.324805288 | 0.418274733 | no |
| PIP5K1B     | -0.037279227 | -0.984884436 | 0.325022592 | 0.418527913 | no |
| GOSR1       | -0.03726216  | -0.984432913 | 0.325244295 | 0.41877525  | no |
| FOXJ3       | 0.037261252  | 0.984408885  | 0.325256096 | 0.41877525  | no |
| AFTPH       | 0.037251083  | 0.984139873  | 0.325388235 | 0.418918704 | no |
| C21orf90    | 0.037247783  | 0.984052564  | 0.325431128 | 0.418947249 | no |
| PPTC7       | 0.037234324  | 0.983696505  | 0.325606093 | 0.419145803 | no |
| SPDYE2      | 0.037224045  | 0.983424554  | 0.325739769 | 0.419291185 | no |

|              |              |              |             |             |    |
|--------------|--------------|--------------|-------------|-------------|----|
| WNT9A        | -0.037218893 | -0.983288252 | 0.325806781 | 0.419350744 | no |
| C20orf160    | -0.037216791 | -0.983232647 | 0.325834121 | 0.419359237 | no |
| ZC3H8        | -0.037192143 | -0.982580569 | 0.326154852 | 0.419745309 | no |
| CNTNAP4      | -0.037179459 | -0.982245004 | 0.326319983 | 0.419931094 | no |
| ZNF324       | -0.037152412 | -0.981529448 | 0.32667229  | 0.420352441 | no |
| C8orf75      | 0.03715113   | 0.98149555   | 0.326688985 | 0.420352441 | no |
| KIAA1751     | 0.037148168  | 0.981417186  | 0.326727584 | 0.420375353 | no |
| KLHL18       | 0.037140431  | 0.981212489  | 0.326828424 | 0.420478338 | no |
| C18orf22     | -0.037138421 | -0.981159307 | 0.326854626 | 0.420485291 | no |
| ARV1         | 0.037133548  | 0.981030402  | 0.326918143 | 0.420540244 | no |
| LYZL1        | -0.037125674 | -0.9808221   | 0.327020798 | 0.42062638  | no |
| LOC100271831 | 0.037125221  | 0.9808101    | 0.327026712 | 0.42062638  | no |
| OR11A1       | 0.037117051  | 0.980593973  | 0.327133247 | 0.420718323 | no |
| C15orf43     | 0.037116548  | 0.980580651  | 0.327139814 | 0.420718323 | no |
| SMUG1        | -0.037114652 | -0.980530505 | 0.327164536 | 0.420723356 | no |
| LOC349196    | 0.037086365  | 0.979782165  | 0.32753361  | 0.421120695 | no |
| PRAMEF6      | 0.037086298  | 0.979780378  | 0.327534491 | 0.421120695 | no |
| AIFM3        | -0.037086182 | -0.979777312 | 0.327536004 | 0.421120695 | no |
| PCDHB17      | 0.037078992  | 0.979587099  | 0.327629859 | 0.42121458  | no |
| CCDC47       | 0.037066181  | 0.979248173  | 0.327797135 | 0.42140284  | no |
| NDUFA12      | 0.037045419  | 0.978698924  | 0.328068333 | 0.421700657 | no |
| RCN2         | -0.037045252 | -0.97869451  | 0.328070513 | 0.421700657 | no |
| UGT2A3       | -0.037035624 | -0.978439788 | 0.328196335 | 0.421816607 | no |
| KISS1R       | 0.037034896  | 0.978420533  | 0.328205847 | 0.421816607 | no |
| TRAF4        | -0.037033356 | -0.978385188 | 0.328223309 | 0.421816607 | no |
| BCAS1        | -0.037028734 | -0.978257528 | 0.328286383 | 0.42187085  | no |
| C17orf71     | -0.037012178 | -0.977819531 | 0.328502847 | 0.422122191 | no |
| OR2F1        | 0.037010369  | 0.97777166   | 0.328526511 | 0.42212577  | no |
| ASAP1IT1     | 0.036999895  | 0.97749457   | 0.328663507 | 0.422274961 | no |
| WWC3         | 0.036996057  | 0.977393047  | 0.32871371  | 0.422312626 | no |
| ACTR3C       | 0.036979273  | 0.976949022  | 0.328933339 | 0.422567941 | no |
| SPRR2B       | -0.036976495 | -0.976875527 | 0.328969702 | 0.422587803 | no |
| LOC148413    | 0.036969052  | 0.976678624  | 0.329067134 | 0.422686106 | no |
| EIF1AD       | 0.036958896  | 0.976409947  | 0.329200112 | 0.422830053 | no |
| TAC1         | -0.036956598 | -0.976349163 | 0.329230201 | 0.422841837 | no |
| PSPH         | 0.036922431  | 0.975445268  | 0.329677854 | 0.423389878 | no |
| KRTAP1-3     | -0.036916596 | -0.975290916 | 0.329754336 | 0.423461202 | no |
| OCM2         | -0.036878021 | -0.97427041  | 0.330260291 | 0.424083999 | no |
| GUK1         | 0.036855208  | 0.973666903  | 0.330559739 | 0.42444156  | no |
| HIST1H2B0    | 0.036847045  | 0.973450962  | 0.330666927 | 0.424552228 | no |
| LOC144776    | 0.036837096  | 0.97318776   | 0.330797606 | 0.42469304  | no |
| FBX038       | -0.036832797 | -0.973074043 | 0.330854076 | 0.424713962 | no |
| BYSL         | -0.036831135 | -0.973030062 | 0.330875918 | 0.424713962 | no |
| KPRP         | 0.036831058  | 0.97302804   | 0.330876923 | 0.424713962 | no |
| FOXMI        | 0.036827362  | 0.972930262  | 0.330925485 | 0.42474933  | no |
| TLL2         | 0.036814992  | 0.972603008  | 0.331088052 | 0.424931012 | no |
| SCGB1D2      | 0.036811173  | 0.972501979  | 0.33113825  | 0.424968461 | no |
| SNORA22      | 0.036805033  | 0.97233954   | 0.33121897  | 0.425045074 | no |
| KRT27        | 0.036802307  | 0.97226743   | 0.331254808 | 0.425064084 | no |
| ZNF461       | 0.036797425  | 0.972138273  | 0.331319003 | 0.425117046 | no |
| WFDC10A      | -0.03679597  | -0.972099784 | 0.331338135 | 0.425117046 | no |

|           |              |              |             |             |    |
|-----------|--------------|--------------|-------------|-------------|----|
| ZCCHC16   | -0.036791227 | -0.971974326 | 0.331400502 | 0.425170084 | no |
| SF3B14    | 0.036763168  | 0.971232029  | 0.331769664 | 0.425616692 | no |
| KCNMA1    | -0.036759546 | -0.971136206 | 0.331817339 | 0.425650844 | no |
| TCEANC    | -0.036742111 | -0.970674992 | 0.332046867 | 0.425918257 | no |
| MAFG      | -0.036737913 | -0.970563941 | 0.332102148 | 0.425962141 | no |
| CSNK1A1L  | -0.03673334  | -0.970444553 | 0.332161586 | 0.425998126 | no |
| SCARNA12  | 0.036732584  | 0.970422945  | 0.332172344 | 0.425998126 | no |
| FGF3      | 0.036724996  | 0.970222228  | 0.332272229 | 0.426099274 | no |
| TMEM14E   | 0.03670255   | 0.969628432  | 0.33256808  | 0.426443214 | no |
| PFKL      | 0.036701443  | 0.969599134  | 0.332582679 | 0.426443214 | no |
| FLJ42393  | 0.036687198  | 0.969222307  | 0.332770483 | 0.426656962 | no |
| ZNF204P   | -0.036682059 | -0.969086365 | 0.332838251 | 0.426716789 | no |
| CALHM3    | -0.036680423 | -0.969043067 | 0.332859838 | 0.426717405 | no |
| PRDM5     | 0.03666978   | 0.968761514  | 0.333000228 | 0.426848096 | no |
| JAM2      | 0.036669493  | 0.968753936  | 0.333004007 | 0.426848096 | no |
| AGGF1     | 0.036665538  | 0.968649296  | 0.333056194 | 0.426882028 | no |
| SERPINE3  | -0.036664286 | -0.968616187 | 0.333072707 | 0.426882028 | no |
| DPPA2     | 0.036651227  | 0.968270734  | 0.333245037 | 0.427075821 | no |
| ATP6VOA4  | -0.036636487 | -0.967880795 | 0.333439627 | 0.427298116 | no |
| CDKL4     | 0.036611831  | 0.967228528  | 0.333765291 | 0.427688342 | no |
| FAM95B1   | -0.036607605 | -0.967116741 | 0.333821125 | 0.427732778 | no |
| STRA8     | -0.036603945 | -0.96701993  | 0.333869483 | 0.427767631 | no |
| FLJ25363  | -0.036601884 | -0.966965415 | 0.333896716 | 0.427775414 | no |
| ELFN1     | -0.036599641 | -0.966906072 | 0.333926363 | 0.427786289 | no |
| LMNB2     | 0.0365865    | 0.96655845   | 0.334100062 | 0.427974603 | no |
| NYNRIN    | 0.036585318  | 0.966527169  | 0.334115695 | 0.427974603 | no |
| PSAPL1    | -0.036583709 | -0.966484599 | 0.334136971 | 0.427974741 | no |
| LASS1     | 0.036569985  | 0.966121559  | 0.334318449 | 0.428180059 | no |
| CYP20A1   | 0.036559265  | 0.965837971  | 0.334460255 | 0.428334543 | no |
| L3MBTL3   | 0.036544986  | 0.965460247  | 0.334649193 | 0.428538115 | no |
| TMEM63A   | 0.036543146  | 0.965411553  | 0.334673554 | 0.428538115 | no |
| HBD       | 0.036542447  | 0.965393075  | 0.334682799 | 0.428538115 | no |
| LOC340074 | 0.036524853  | 0.964927653  | 0.334915714 | 0.428809189 | no |
| KDM6A     | 0.036522512  | 0.964865718  | 0.334946716 | 0.428821726 | no |
| RAP1GDS1  | 0.03650567   | 0.964420182  | 0.33516979  | 0.429080151 | no |
| CDH4      | 0.036501455  | 0.964308674  | 0.335225636 | 0.429124471 | no |
| SLC10A1   | -0.036497614 | -0.964207084 | 0.335276519 | 0.429162435 | no |
| TRIM7     | -0.036477273 | -0.963668991 | 0.335546118 | 0.429480338 | no |
| OTUD7B    | 0.036467693  | 0.963415544  | 0.335673151 | 0.429615735 | no |
| RNF113B   | 0.036450436  | 0.962959041  | 0.335902036 | 0.429881464 | no |
| NEUROG2   | -0.036440542 | -0.962697328 | 0.336033302 | 0.430022236 | no |
| C6orf26   | -0.036438473 | -0.96264258  | 0.336060766 | 0.430030162 | no |
| SSX3      | 0.036436259  | 0.962584005  | 0.336090151 | 0.430040546 | no |
| CFLP1     | -0.036430984 | -0.962444482 | 0.336160152 | 0.430098844 | no |
| PCDHGB1   | -0.03642962  | -0.962408395 | 0.336178259 | 0.430098844 | no |
| ADORA2A   | 0.036413302  | 0.961976731  | 0.336394898 | 0.430348776 | no |
| SYCP3     | -0.036409862 | -0.961885722 | 0.336440584 | 0.430379989 | no |
| CCDC141   | -0.036402001 | -0.961677778 | 0.336544986 | 0.430486305 | no |
| RIC8A     | 0.036399303  | 0.961606398  | 0.336580829 | 0.430504915 | no |
| SPDYC     | -0.036391202 | -0.9613921   | 0.33668845  | 0.430594134 | no |
| BCDIN3D   | -0.036390846 | -0.961382689 | 0.336693177 | 0.430594134 | no |

|              |              |              |             |             |    |
|--------------|--------------|--------------|-------------|-------------|----|
| TGM7         | 0.036385437  | 0.961239604  | 0.336765048 | 0.430658807 | no |
| C1QBP        | 0.036342894  | 0.960114213  | 0.337330672 | 0.43135485  | no |
| GJC3         | -0.03632161  | -0.959551164 | 0.337613891 | 0.431689707 | no |
| PRMT1        | 0.03631485   | 0.959372348  | 0.337703869 | 0.431777451 | no |
| SLC39A12     | 0.036301001  | 0.959005997  | 0.337888261 | 0.43198589  | no |
| EPHX4        | -0.036290343 | -0.958724067 | 0.338030207 | 0.432140039 | no |
| ACTN3        | -0.036277022 | -0.958371693 | 0.338207673 | 0.432339576 | no |
| NBLA00301    | 0.036267276  | 0.958113891  | 0.338337548 | 0.432478254 | no |
| BBX          | -0.036253488 | -0.957749135 | 0.338521358 | 0.432685853 | no |
| PCDHGA7      | -0.036225385 | -0.957005755 | 0.338896167 | 0.433120161 | no |
| SLC13A1      | -0.036224799 | -0.956990237 | 0.338903994 | 0.433120161 | no |
| POLR3D       | -0.036218131 | -0.956813853 | 0.338992966 | 0.433206485 | no |
| CCDC99       | 0.036207291  | 0.956527105  | 0.339137641 | 0.433363976 | no |
| EXOSC1       | 0.036202528  | 0.956401122  | 0.339201216 | 0.433417822 | no |
| TSPAN31      | 0.036194344  | 0.956184634  | 0.339310482 | 0.433530038 | no |
| METT11D1     | -0.036187805 | -0.95601165  | 0.339397807 | 0.433614209 | no |
| TRIM66       | -0.036171149 | -0.955571044 | 0.339620295 | 0.433871043 | no |
| RPL3L        | 0.036163622  | 0.955371945  | 0.339720863 | 0.433972099 | no |
| SMYD1        | -0.036158156 | -0.95522734  | 0.339793917 | 0.434037997 | no |
| CACNA1C      | -0.036143268 | -0.954833524 | 0.339992924 | 0.434264763 | no |
| DHX37        | 0.036133493  | 0.954574955  | 0.340123627 | 0.434404263 | no |
| LOC399815    | -0.036128747 | -0.954449412 | 0.340187099 | 0.434457884 | no |
| PLA2G4D      | -0.036119877 | -0.954214777 | 0.340305745 | 0.434581958 | no |
| C22orf9      | 0.036110635  | 0.953970304  | 0.340429395 | 0.434691729 | no |
| PPP1R14A     | 0.036110238  | 0.953959809  | 0.340434704 | 0.434691729 | no |
| ATP13A1      | -0.036096103 | -0.953585904 | 0.340623875 | 0.434905811 | no |
| OR1L3        | -0.036092703 | -0.953495956 | 0.340669393 | 0.434936461 | no |
| SLC44A5      | 0.036082231  | 0.953218938  | 0.340809602 | 0.435087992 | no |
| BRF2         | 0.036075873  | 0.953050767  | 0.340894737 | 0.435139435 | no |
| DTWD2        | 0.03607566   | 0.953045133  | 0.34089759  | 0.435139435 | no |
| DLAT         | 0.0360744    | 0.953011802  | 0.340914465 | 0.435139435 | no |
| SYNCRIP      | -0.03606175  | -0.952677164 | 0.34108392  | 0.435328243 | no |
| VCPIP1       | 0.036036363  | 0.952005631  | 0.341424136 | 0.435734956 | no |
| OR4D2        | -0.036030789 | -0.951858195 | 0.34149886  | 0.435802812 | no |
| CLUU1        | 0.036026818  | 0.951753154  | 0.341552104 | 0.435843249 | no |
| HIGD1A       | 0.036011402  | 0.951345364  | 0.341758857 | 0.436079556 | no |
| CIB3         | 0.036003485  | 0.951135942  | 0.341865067 | 0.436166658 | no |
| BNIP1        | 0.036002842  | 0.951118937  | 0.341873692 | 0.436166658 | no |
| NVL          | -0.03600149  | -0.95108316  | 0.341891839 | 0.436166658 | no |
| ZNF273       | -0.035983989 | -0.950620223 | 0.342126707 | 0.436438751 | no |
| PIK3C2G      | -0.035964492 | -0.950104481 | 0.342388488 | 0.436745138 | no |
| LRP2         | 0.035952743  | 0.94979369   | 0.342546301 | 0.436918877 | no |
| OR10G2       | 0.035924228  | 0.949039415  | 0.342929501 | 0.437380056 | no |
| LOC100132831 | 0.03591823   | 0.948880764  | 0.343010136 | 0.437455304 | no |
| SNX14        | -0.035905883 | -0.948554158 | 0.343176175 | 0.437639454 | no |
| MTHFD2L      | -0.035897525 | -0.948333088 | 0.34328859  | 0.437755201 | no |
| LHX4         | -0.03589316  | -0.948217611 | 0.34334732  | 0.43780248  | no |
| RACGAP1      | 0.035885515  | 0.9480154    | 0.343450178 | 0.437906016 | no |
| FAM9A        | -0.035881566 | -0.947910923 | 0.343503329 | 0.437946166 | no |
| LIMA1        | -0.035871804 | -0.947652722 | 0.343634708 | 0.438086042 | no |
| RAB37        | 0.035863985  | 0.947445871  | 0.343739983 | 0.438192621 | no |



|            |              |              |             |             |    |
|------------|--------------|--------------|-------------|-------------|----|
| KLRA1      | -0.035858218 | -0.947293328 | 0.343817631 | 0.438263972 | no |
| CADM1      | 0.035846146  | 0.946974014  | 0.343980206 | 0.438443563 | no |
| DBI        | -0.035842399 | -0.946874883 | 0.344030687 | 0.438480264 | no |
| RPS6KA2    | -0.035840191 | -0.946816502 | 0.344060419 | 0.438490517 | no |
| FOXE1      | 0.035837778  | 0.946752656  | 0.344092937 | 0.438504317 | no |
| YIPF3      | -0.035835591 | -0.946694813 | 0.344122398 | 0.438514222 | no |
| ST7        | -0.035816533 | -0.946190687 | 0.344379236 | 0.438787189 | no |
| PRR7       | 0.035816475  | 0.94618916   | 0.344380014 | 0.438787189 | no |
| HSD17B13   | 0.035813611  | 0.9461134    | 0.344418622 | 0.438808727 | no |
| NDOR1      | -0.035803487 | -0.945845613 | 0.344555112 | 0.438954962 | no |
| NCRNA00207 | -0.035791718 | -0.945534301 | 0.344713829 | 0.439129494 | no |
| APAF1      | 0.035776189  | 0.945123536  | 0.344923323 | 0.439354825 | no |
| DDT        | 0.035775385  | 0.945102263  | 0.344934174 | 0.439354825 | no |
| OR2D2      | -0.035760039 | -0.944696338 | 0.345141284 | 0.439590933 | no |
| PKDREJ     | -0.035739149 | -0.944143778 | 0.345423336 | 0.439901227 | no |
| LCE1A      | -0.035738772 | -0.944133812 | 0.345428425 | 0.439901227 | no |
| GABRQ      | -0.03573676  | -0.944080569 | 0.345455611 | 0.43990814  | no |
| GRXCR2     | 0.035733035  | 0.943982044  | 0.345505921 | 0.439944496 | no |
| C14orf118  | -0.035731305 | -0.943936277 | 0.345529293 | 0.439946548 | no |
| ZNF26      | 0.035722167  | 0.943694578  | 0.345652738 | 0.440076011 | no |
| COX7C      | -0.035716653 | -0.943548714 | 0.345727249 | 0.44014316  | no |
| AP1G2      | 0.035714474  | 0.943491071  | 0.345756698 | 0.440152936 | no |
| SLC14A1    | -0.035710059 | -0.943374313 | 0.345816352 | 0.440182115 | no |
| NUP155     | 0.035709556  | 0.943360984  | 0.345823163 | 0.440182115 | no |
| SNX25      | -0.035687779 | -0.942784963 | 0.346117565 | 0.440528847 | no |
| RFPL3      | -0.035686183 | -0.94274275  | 0.346139146 | 0.440528847 | no |
| SNORA64    | 0.035682664  | 0.942649662  | 0.34618674  | 0.440561686 | no |
| NEDD8      | 0.03561348   | 0.940819665  | 0.347123225 | 0.441725665 | no |
| GSTM3      | -0.035604647 | -0.94058603  | 0.347242902 | 0.441850147 | no |
| SERPINB10  | 0.035596142  | 0.940361073  | 0.347358159 | 0.44196899  | no |
| CIB2       | 0.0355661    | 0.939566424  | 0.347765492 | 0.442459424 | no |
| PGM5P2     | 0.035562845  | 0.939480331  | 0.34780964  | 0.442487749 | no |
| RBP2       | -0.035544464 | -0.93899412  | 0.34805904  | 0.442777177 | no |
| ACSBG2     | -0.035505965 | -0.937975796 | 0.348581753 | 0.443414237 | no |
| XP01       | 0.035498707  | 0.937783827  | 0.348680348 | 0.443511751 | no |
| AADA4      | -0.035495568 | -0.937700794 | 0.348722999 | 0.443538098 | no |
| PDE4D      | 0.035490947  | 0.93757856   | 0.348785793 | 0.443590059 | no |
| FAM63B     | -0.035488071 | -0.937502504 | 0.348824867 | 0.443611848 | no |
| IQCE       | -0.035480433 | -0.937300468 | 0.34892868  | 0.44371596  | no |
| LOC650293  | -0.035476272 | -0.937190395 | 0.348985246 | 0.443719034 | no |
| C1orf175   | 0.035475917  | 0.937181005  | 0.348990072 | 0.443719034 | no |
| LOC84740   | -0.035475412 | -0.937167648 | 0.348996937 | 0.443719034 | no |
| GJA10      | 0.035464513  | 0.936879357  | 0.349145122 | 0.443879524 | no |
| KCNG2      | -0.035460438 | -0.936771588 | 0.349200527 | 0.443922048 | no |
| SLC35B2    | 0.035436571  | 0.936140295  | 0.349525191 | 0.444306842 | no |
| GGTA1      | -0.03539747  | -0.935106053 | 0.350057501 | 0.444955523 | no |
| SULT1A3    | -0.035392816 | -0.934982948 | 0.350120896 | 0.445008127 | no |
| C21orf99   | -0.035385221 | -0.934782043 | 0.350224371 | 0.445111662 | no |
| PRR21      | -0.035371966 | -0.934431449 | 0.350404988 | 0.445313222 | no |
| CDC42EP4   | -0.035359289 | -0.934096134 | 0.35057779  | 0.445504824 | no |
| HCG22      | 0.035335211  | 0.933459281  | 0.350906135 | 0.44589405  | no |

|           |              |              |             |             |    |
|-----------|--------------|--------------|-------------|-------------|----|
| EIF5      | 0.035330186  | 0.933326355  | 0.350974693 | 0.445953138 | no |
| CGB1      | 0.03531943   | 0.933041858  | 0.351121453 | 0.446111578 | no |
| ZNF137    | 0.035317774  | 0.932998058  | 0.351144051 | 0.446112255 | no |
| MRPL12    | -0.035307949 | -0.93273818  | 0.351278152 | 0.446254582 | no |
| TGFA      | -0.035298578 | -0.932490312 | 0.351406085 | 0.446389057 | no |
| IL17F     | 0.035295851  | 0.932418181  | 0.35144332  | 0.446408308 | no |
| RRAGA     | -0.035284074 | -0.932106691 | 0.351604144 | 0.446573942 | no |
| CENPH     | 0.035283067  | 0.932080063  | 0.351617894 | 0.446573942 | no |
| RPL23AP64 | -0.035276969 | -0.931918751 | 0.3517012   | 0.446651687 | no |
| CDH3      | -0.035259649 | -0.931460635 | 0.351937854 | 0.446898382 | no |
| SNORA52   | 0.035259517  | 0.931457141  | 0.351939659 | 0.446898382 | no |
| PDE8A     | 0.03524444   | 0.93105835   | 0.35214575  | 0.447131996 | no |
| DRD1      | -0.035239877 | -0.930937669 | 0.352208131 | 0.447183119 | no |
| RAB10     | 0.035234513  | 0.930795798  | 0.352281475 | 0.447248154 | no |
| HOXD8     | 0.035217396  | 0.930343053  | 0.352515598 | 0.44750173  | no |
| CLEC2A    | -0.035216674 | -0.930323958 | 0.352525475 | 0.44750173  | no |
| CCDC97    | 0.035208128  | 0.930097898  | 0.352642414 | 0.44762207  | no |
| ARMS2     | 0.035205678  | 0.930033108  | 0.352675933 | 0.447636513 | no |
| CDKN2BAS  | 0.03517876   | 0.929321136  | 0.353044414 | 0.44807608  | no |
| ANKRD20A4 | -0.035164045 | -0.928931929 | 0.35324595  | 0.448303724 | no |
| OR2V2     | -0.035161758 | -0.928871439 | 0.35327728  | 0.448315343 | no |
| ABCD2     | 0.035149338  | 0.928542917  | 0.353447459 | 0.448503152 | no |
| MAF1      | -0.035111556 | -0.927543595 | 0.353965442 | 0.449132253 | no |
| HHLA1     | -0.035106232 | -0.927402777 | 0.354038472 | 0.449196726 | no |
| ANAPC1    | 0.03509555   | 0.927120248  | 0.354185023 | 0.449354468 | no |
| C3orf74   | 0.035083957  | 0.926813626  | 0.354344115 | 0.449528099 | no |
| RPS6KC1   | -0.035073562 | -0.926538665 | 0.354486817 | 0.449680918 | no |
| APOBEC1   | -0.035059229 | -0.926159562 | 0.354683628 | 0.449902353 | no |
| AGXT      | 0.035041682  | 0.925695478  | 0.354924652 | 0.450158319 | no |
| LSM3      | 0.035041297  | 0.925685275  | 0.354929952 | 0.450158319 | no |
| FABP9     | 0.035032152  | 0.925443409  | 0.355055608 | 0.450289442 | no |
| CYP26A1   | 0.03498577   | 0.924216633  | 0.355693385 | 0.45106999  | no |
| TFEB      | -0.034976442 | -0.923969907 | 0.35582174  | 0.451204462 | no |
| KRT14     | -0.034972661 | -0.923869917 | 0.355873767 | 0.451228991 | no |
| ZNF469    | -0.034970633 | -0.923816264 | 0.355901685 | 0.451228991 | no |
| OR1L6     | -0.034970171 | -0.923804055 | 0.355908039 | 0.451228991 | no |
| C6orf142  | 0.034955948  | 0.923427864  | 0.356103833 | 0.451448915 | no |
| ZRSR2     | -0.034940229 | -0.92301211  | 0.356320297 | 0.451695013 | no |
| HYAL1     | -0.034931819 | -0.922789656 | 0.356436153 | 0.451813551 | no |
| MRPL4     | -0.034894371 | -0.921799194 | 0.356952282 | 0.452439423 | no |
| KLF7      | 0.034891958  | 0.921735375  | 0.356985554 | 0.452453231 | no |
| PRAMEF16  | -0.034882246 | -0.921478504 | 0.357119495 | 0.452573172 | no |
| FOXB2     | -0.03488185  | -0.921468029 | 0.357124957 | 0.452573172 | no |
| TMEM139   | 0.034863746  | 0.920989201  | 0.35737472  | 0.452861303 | no |
| KRTAP10-3 | -0.034828394 | -0.920054164 | 0.357862764 | 0.453451326 | no |
| CC2D2A    | -0.0348244   | -0.919948541 | 0.35791792  | 0.453492794 | no |
| ZFP82     | -0.034800761 | -0.919323303 | 0.35824453  | 0.453878175 | no |
| OR8U1     | -0.034790947 | -0.919063741 | 0.358380175 | 0.454021578 | no |
| SMC1B     | 0.03478277   | 0.918847465  | 0.358493223 | 0.45413634  | no |
| HHLA2     | -0.034773834 | -0.91861113  | 0.358616782 | 0.454264401 | no |
| LGALS4    | -0.034771954 | -0.918561401 | 0.358642784 | 0.454268877 | no |

|           |              |              |             |             |    |
|-----------|--------------|--------------|-------------|-------------|----|
| SCG2      | 0.034734683  | 0.917575648  | 0.359158462 | 0.454893553 | no |
| ATP1B2    | -0.034729849 | -0.917447779 | 0.359225388 | 0.454949818 | no |
| AP1S1     | 0.034722143  | 0.917243976  | 0.359332074 | 0.455056428 | no |
| BAD       | -0.03470091  | -0.916682391 | 0.359626155 | 0.455400325 | no |
| ADC       | -0.034690339 | -0.916402795 | 0.359772625 | 0.45555727  | no |
| GPR89A    | 0.034680128  | 0.916132736  | 0.359914135 | 0.455707914 | no |
| MC1R      | 0.034646056  | 0.915231588  | 0.360386585 | 0.456260243 | no |
| OR2M3     | -0.034645414 | -0.915214605 | 0.360395493 | 0.456260243 | no |
| RNU6ATAC  | 0.034624712  | 0.914667067  | 0.360682749 | 0.456590258 | no |
| GPR151    | -0.034623373 | -0.914631649 | 0.360701335 | 0.456590258 | no |
| WHAMML2   | 0.034620849  | 0.914564903  | 0.360736363 | 0.45660601  | no |
| TBL1Y     | -0.03460453  | -0.914133307 | 0.360962915 | 0.456864168 | no |
| CALML5    | -0.034595463 | -0.913893486 | 0.36108884  | 0.45699494  | no |
| WFDC1     | -0.034589076 | -0.913724558 | 0.361177557 | 0.457078608 | no |
| YIF1A     | -0.034576702 | -0.913397289 | 0.36134947  | 0.457256713 | no |
| GAS2      | 0.03457569   | 0.913370535  | 0.361363526 | 0.457256713 | no |
| MICAL2    | 0.03456734   | 0.913149676  | 0.361479574 | 0.457374931 | no |
| OR10H2    | -0.034550309 | -0.912699261 | 0.361716312 | 0.457645832 | no |
| FOLH1     | 0.034533047  | 0.912242691  | 0.361956385 | 0.457920918 | no |
| OCM       | -0.034530845 | -0.91218446  | 0.36198701  | 0.457931009 | no |
| SCAND1    | -0.034491219 | -0.911136437 | 0.362538488 | 0.458599959 | no |
| RHCG      | 0.034488843  | 0.911073584  | 0.362571578 | 0.458613123 | no |
| OR4E2     | -0.034484982 | -0.910971491 | 0.362625332 | 0.458638482 | no |
| PAGE4     | -0.034484145 | -0.910949339 | 0.362636996 | 0.458638482 | no |
| SLC10A4   | 0.034477124  | 0.910763651  | 0.362734777 | 0.458733454 | no |
| ZNF699    | 0.034464718  | 0.910435529  | 0.362907604 | 0.458912293 | no |
| PTTG1IP   | 0.034463714  | 0.910408986  | 0.362921587 | 0.458912293 | no |
| TAF11     | 0.034458552  | 0.910272475  | 0.362993507 | 0.458974529 | no |
| PRAMEF10  | -0.03445674  | -0.910224541 | 0.363018762 | 0.458977759 | no |
| LSG1      | 0.034452445  | 0.910110952  | 0.363078615 | 0.459024727 | no |
| LYRM5     | 0.034442158  | 0.90983888   | 0.363222001 | 0.459177291 | no |
| LOC648691 | 0.034434667  | 0.909640752  | 0.36332644  | 0.459280603 | no |
| PITPNM1   | 0.03442785   | 0.90946047   | 0.363421489 | 0.459372032 | no |
| OR10G4    | -0.034367768 | -0.90787144  | 0.364259929 | 0.460403054 | no |
| DAO       | 0.034364497  | 0.907784919  | 0.364305616 | 0.460432016 | no |
| HARS2     | -0.034351518 | -0.907441661 | 0.364486907 | 0.460632347 | no |
| C2orf51   | -0.034342593 | -0.907205606 | 0.364611612 | 0.460761146 | no |
| TMPRSS15  | 0.034325241  | 0.906746687  | 0.36485413  | 0.4610388   | no |
| SEMA4F    | 0.034301594  | 0.906121295  | 0.365184783 | 0.461427782 | no |
| GRXCR1    | -0.034286788 | -0.905729716 | 0.365391912 | 0.461660647 | no |
| C1orf204  | -0.034262039 | -0.905075166 | 0.365738305 | 0.462069427 | no |
| NUPL2     | -0.034255607 | -0.904905049 | 0.365828366 | 0.46215433  | no |
| OR5AC2    | -0.034237697 | -0.904431397 | 0.366079193 | 0.462405678 | no |
| PLA2G4C   | -0.034236671 | -0.904404252 | 0.366093571 | 0.462405678 | no |
| PWWP2A    | -0.034236502 | -0.904399783 | 0.366095938 | 0.462405678 | no |
| ZHX1      | -0.034232784 | -0.904301459 | 0.366148022 | 0.462416131 | no |
| WDR54     | 0.034232646  | 0.904297804  | 0.366149958 | 0.462416131 | no |
| SLC25A5   | 0.034229598  | 0.904217188  | 0.366192665 | 0.462439148 | no |
| CHRNA3    | -0.03422808  | -0.904177052 | 0.366213928 | 0.462439148 | no |
| HIST1H3G  | 0.034211468  | 0.903737715  | 0.366446733 | 0.462704225 | no |
| UFD1L     | 0.03420602   | 0.90359362   | 0.366523109 | 0.462771762 | no |

|              |              |              |             |             |    |
|--------------|--------------|--------------|-------------|-------------|----|
| ASB7         | 0.034187638  | 0.903107467  | 0.366780863 | 0.463068283 | no |
| LRRN2        | 0.034185147  | 0.903041595  | 0.366815797 | 0.46308347  | no |
| LIN7C        | -0.034151938 | -0.902163299 | 0.367281776 | 0.463642791 | no |
| ALAS2        | 0.03414391   | 0.901950991  | 0.367394472 | 0.463756098 | no |
| SULT2A1      | -0.034139118 | -0.901824273 | 0.367461745 | 0.463812059 | no |
| CHAD         | 0.034130133  | 0.901586643  | 0.367587922 | 0.463942356 | no |
| LCE2A        | 0.034127147  | 0.901507659  | 0.367629866 | 0.463966332 | no |
| C1orf210     | 0.034124977  | 0.901450283  | 0.367660338 | 0.463975827 | no |
| GLUL         | -0.034116376 | -0.901222816 | 0.367781159 | 0.464083108 | no |
| PXK          | 0.034115658  | 0.901203806  | 0.367791257 | 0.464083108 | no |
| SPATA8       | 0.034100744  | 0.900809396  | 0.368000813 | 0.464318549 | no |
| CCL4         | 0.034098538  | 0.900751055  | 0.368031816 | 0.46432869  | no |
| ESD          | -0.034095994 | -0.900683761 | 0.36806758  | 0.464344835 | no |
| TG           | -0.034090958 | -0.900550589 | 0.368138361 | 0.464366808 | no |
| CPXM2        | 0.03409061   | 0.900541373  | 0.36814326  | 0.464366808 | no |
| RSBN1        | -0.034089853 | -0.900521353 | 0.368153901 | 0.464366808 | no |
| BFSP2        | 0.034086649  | 0.900436623  | 0.368198941 | 0.464394647 | no |
| S100A7A      | -0.034051936 | -0.899518566 | 0.368687169 | 0.464981423 | no |
| TRIM71       | -0.034043556 | -0.899296935 | 0.368805095 | 0.465101136 | no |
| RRAS2        | 0.034037021  | 0.899124129  | 0.368897058 | 0.465170906 | no |
| CDC14C       | 0.034036355  | 0.89910651   | 0.368906435 | 0.465170906 | no |
| PRKRA        | -0.034012894 | -0.898486034 | 0.369236759 | 0.46555839  | no |
| SNORA38B     | 0.034010876  | 0.898432676  | 0.369265173 | 0.465565183 | no |
| SULT6B1      | 0.034007443  | 0.89834189   | 0.369313523 | 0.465597108 | no |
| KRTAP4-1     | -0.033995884 | -0.898036181 | 0.369476363 | 0.465773357 | no |
| COMMD6       | 0.033993537  | 0.897974121  | 0.369509426 | 0.465785994 | no |
| ZBTB1        | 0.033989957  | 0.897879426  | 0.369559878 | 0.46582055  | no |
| LOC100240726 | -0.033952365 | -0.896885264 | 0.370089815 | 0.46645944  | no |
| COX5A        | 0.033938935  | 0.896530075  | 0.370279263 | 0.466669127 | no |
| PITPNC1      | -0.033932707 | -0.89636538  | 0.370367126 | 0.466750768 | no |
| C20orf56     | 0.033928685  | 0.896259015  | 0.370423878 | 0.466793192 | no |
| SMARCA5      | -0.033924443 | -0.89614682  | 0.370483748 | 0.466839539 | no |
| LOC146880    | 0.033904886  | 0.895629611  | 0.370759815 | 0.467158291 | no |
| TSFM         | 0.033900386  | 0.895510588  | 0.370823363 | 0.467209245 | no |
| ARAP2        | -0.033882403 | -0.895035007 | 0.371077351 | 0.467497521 | no |
| VPS18        | 0.033880912  | 0.894995578  | 0.371098413 | 0.467497521 | no |
| RCOR1        | -0.033878455 | -0.894930599 | 0.371133125 | 0.46751212  | no |
| YIPF6        | 0.033864262  | 0.894555251  | 0.371333678 | 0.467735612 | no |
| DNMT3B       | 0.033860394  | 0.89445295   | 0.37138835  | 0.467775334 | no |
| PHC3         | -0.033833767 | -0.893748777 | 0.371764814 | 0.468220333 | no |
| LOXHD1       | -0.033823765 | -0.893484272 | 0.371906284 | 0.468369332 | no |
| HNF4A        | -0.033820864 | -0.893407537 | 0.371947332 | 0.468387579 | no |
| PCDHGB8P     | -0.033818367 | -0.893341491 | 0.371982664 | 0.468387579 | no |
| IL5          | -0.033817829 | -0.893327268 | 0.371990274 | 0.468387579 | no |
| C20orf200    | 0.033801542  | 0.892896549  | 0.372220747 | 0.468648591 | no |
| NCOA7        | 0.033791715  | 0.892636664  | 0.372359852 | 0.468794539 | no |
| C9orf69      | 0.03377429   | 0.892175846  | 0.372606587 | 0.469075964 | no |
| CYP3A7       | 0.033767211  | 0.891988617  | 0.372706864 | 0.469172989 | no |
| HDX          | -0.033733476 | -0.891096486 | 0.373184905 | 0.469745511 | no |
| CADM3        | -0.033684301 | -0.889796013 | 0.373882433 | 0.470594225 | no |
| ZNF658       | 0.033681539  | 0.88972297   | 0.373921634 | 0.470614268 | no |

|              |              |              |             |             |    |
|--------------|--------------|--------------|-------------|-------------|----|
| WFDC2        | 0.033650916  | 0.888913103  | 0.374356455 | 0.471132201 | no |
| AIG1         | 0.033630091  | 0.888362383  | 0.374652318 | 0.471432097 | no |
| KIF1C        | -0.033629224 | -0.88833946  | 0.374664636 | 0.471432097 | no |
| BSG          | -0.03362922  | -0.888339339 | 0.374664701 | 0.471432097 | no |
| LOC339568    | -0.03361867  | -0.888060354 | 0.374814638 | 0.471578097 | no |
| CEACAM5      | -0.033617774 | -0.888036644 | 0.374827383 | 0.471578097 | no |
| SYNJ2        | 0.033584818  | 0.887165101  | 0.375296032 | 0.472138334 | no |
| STOML1       | -0.033581652 | -0.887081398 | 0.37534106  | 0.472165602 | no |
| CTAG2        | -0.033550659 | -0.886261755 | 0.375782165 | 0.472691086 | no |
| OR6X1        | -0.033547715 | -0.886183905 | 0.375824079 | 0.472714397 | no |
| USP9X        | 0.033524059  | 0.885558326  | 0.376160984 | 0.473093822 | no |
| KCNA3        | 0.033523249  | 0.885536886  | 0.376172534 | 0.473093822 | no |
| ZNF140       | 0.033518699  | 0.885416573  | 0.37623735  | 0.473145907 | no |
| OR5E1P       | 0.033516685  | 0.885363303  | 0.376266051 | 0.47315257  | no |
| OR6M1        | -0.033491753 | -0.884703969 | 0.376621399 | 0.47356575  | no |
| AHI1         | -0.033490345 | -0.884666738 | 0.376641471 | 0.47356575  | no |
| C14orf148    | 0.033445183  | 0.88347242   | 0.377285697 | 0.47434626  | no |
| PIP4K2A      | -0.033437286 | -0.883263598 | 0.377398407 | 0.474444894 | no |
| PDE3A        | 0.033436399  | 0.88324012   | 0.377411081 | 0.474444894 | no |
| PNPT1        | 0.033432012  | 0.883124111  | 0.377473706 | 0.474490185 | no |
| RAB3GAP1     | -0.033430587 | -0.883086435 | 0.377494046 | 0.474490185 | no |
| UGT1A9       | -0.033421606 | -0.882848925 | 0.377622286 | 0.474621869 | no |
| SAG          | -0.033389761 | -0.88200679  | 0.378077201 | 0.475164098 | no |
| CHIA         | -0.033387341 | -0.881942792 | 0.378111786 | 0.475178026 | no |
| LCE3C        | 0.033375709  | 0.881635169  | 0.378278055 | 0.475357431 | no |
| CYorf15B     | 0.033369299  | 0.881465665  | 0.378369691 | 0.475443033 | no |
| HKR1         | -0.033356087 | -0.881116287 | 0.378558611 | 0.475650861 | no |
| ALDH18A1     | -0.033349549 | -0.880943381 | 0.378652129 | 0.475738798 | no |
| TERC         | 0.033334903  | 0.880556082  | 0.378861655 | 0.475972469 | no |
| OR2Z1        | -0.033330713 | -0.880445268 | 0.378921617 | 0.476018221 | no |
| KRT12        | 0.033305017  | 0.879765751  | 0.379289439 | 0.476450692 | no |
| GUCA2B       | -0.033290275 | -0.879375884 | 0.379500573 | 0.476669032 | no |
| LOC100130331 | -0.033289588 | -0.879357729 | 0.379510407 | 0.476669032 | no |
| RABEPK       | -0.033279875 | -0.879100867 | 0.379649553 | 0.47681418  | no |
| C6orf35      | -0.03325283  | -0.878385673 | 0.380037151 | 0.477255607 | no |
| TSNAXIP1     | -0.033252057 | -0.878365223 | 0.380048238 | 0.477255607 | no |
| MRPL18       | -0.03324976  | -0.878304495 | 0.380081161 | 0.477267308 | no |
| TSR1         | 0.033245907  | 0.878202611  | 0.380136401 | 0.477307027 | no |
| ATP6V1E1     | -0.033224386 | -0.877633484 | 0.380445062 | 0.477664923 | no |
| FOXQ1        | -0.033210761 | -0.877273168 | 0.380640556 | 0.477880698 | no |
| CPNE1        | 0.033207832  | 0.877195718  | 0.380682585 | 0.477903788 | no |
| RLN1         | 0.03320439   | 0.877104706  | 0.380731978 | 0.477936119 | no |
| C11orf51     | -0.033192712 | -0.876795895 | 0.380899601 | 0.478116852 | no |
| CDRT15       | -0.03318767  | -0.876662552 | 0.380971994 | 0.478178035 | no |
| UPB1         | -0.033170285 | -0.876202801 | 0.381221661 | 0.478461702 | no |
| LDHC         | 0.033162131  | 0.875987185  | 0.381338786 | 0.478578993 | no |
| DCT          | -0.033154355 | -0.87578156  | 0.381450504 | 0.478689485 | no |
| LOC100130776 | 0.033146666  | 0.875578232  | 0.381560994 | 0.478798422 | no |
| UGT2B15      | 0.033142132  | 0.875458337  | 0.381626155 | 0.478828602 | no |
| OR4C3        | 0.033141697  | 0.875446826  | 0.381632412 | 0.478828602 | no |
| PCDHAC1      | -0.033136449 | -0.875308044 | 0.381707846 | 0.47889353  | no |

|           |              |              |             |             |    |
|-----------|--------------|--------------|-------------|-------------|----|
| SNORA11   | 0.033132085  | 0.875192651  | 0.381770576 | 0.478942511 | no |
| LCE4A     | -0.033126164 | -0.875036068 | 0.381855706 | 0.479013642 | no |
| ANXA8L2   | -0.033124846 | -0.875001208 | 0.38187466  | 0.479013642 | no |
| SORCS2    | -0.033110033 | -0.874609486 | 0.382087688 | 0.479251124 | no |
| COL23A1   | 0.033099089  | 0.874320078  | 0.382245121 | 0.47941885  | no |
| MYL7      | 0.033092415  | 0.874143604  | 0.38234114  | 0.479509532 | no |
| DSC1      | -0.033080473 | -0.87382781  | 0.382512999 | 0.479695312 | no |
| LOC440905 | 0.03305835   | 0.87324277   | 0.382831511 | 0.480064969 | no |
| KLHL8     | 0.033047614  | 0.872958863  | 0.382986137 | 0.480203487 | no |
| PSMF1     | 0.033047382  | 0.872952732  | 0.382989476 | 0.480203487 | no |
| SLC6A9    | 0.033025856  | 0.872383501  | 0.383299616 | 0.480562547 | no |
| C20orf27  | 0.033024108  | 0.872337293  | 0.383324799 | 0.48056432  | no |
| GNPTAB    | 0.033011301  | 0.871998609  | 0.383509408 | 0.480746696 | no |
| ZNF75D    | -0.033010717 | -0.871983163 | 0.383517829 | 0.480746696 | no |
| WNT8B     | -0.03299409  | -0.871543493 | 0.383757568 | 0.481017391 | no |
| KCNE1L    | 0.032984352  | 0.871285973  | 0.383898028 | 0.481163619 | no |
| TNP2      | -0.032968474 | -0.870866104 | 0.384127108 | 0.481420894 | no |
| LCA5      | 0.032949318  | 0.870359549  | 0.384403594 | 0.481737548 | no |
| LOC653566 | 0.032938818  | 0.870081871  | 0.384555207 | 0.481897681 | no |
| ZNF645    | 0.032910097  | 0.869322391  | 0.384970074 | 0.482383797 | no |
| PPP1R2P9  | -0.032908659 | -0.869284375 | 0.384990847 | 0.482383797 | no |
| LOC732275 | 0.032900851  | 0.869077898  | 0.385103686 | 0.482491275 | no |
| PRSS30P   | 0.032899238  | 0.86903523   | 0.385127007 | 0.482491275 | no |
| OPN1SW    | 0.03289777   | 0.868996421  | 0.385148219 | 0.482491275 | no |
| GRM6      | -0.03288494  | -0.868657158 | 0.385333682 | 0.482693704 | no |
| NBPF22P   | 0.032880049  | 0.868527806  | 0.385404409 | 0.482752391 | no |
| TMEM74    | 0.032875844  | 0.868416629  | 0.385465205 | 0.482798632 | no |
| KIAA1908  | 0.032863948  | 0.868102055  | 0.385637256 | 0.482984207 | no |
| FLJ44054  | 0.032851568  | 0.867774683  | 0.385816358 | 0.483178588 | no |
| GPR101    | -0.032846433 | -0.867638895 | 0.38589066  | 0.483241708 | no |
| LMOD2     | 0.03282193   | 0.866990942  | 0.38624534  | 0.483655908 | no |
| UVRAG     | 0.032814625  | 0.866797771  | 0.386351117 | 0.4837584   | no |
| MCTP1     | 0.032808912  | 0.866646686  | 0.386433861 | 0.483832042 | no |
| C3orf21   | 0.032807146  | 0.866600006  | 0.386459428 | 0.48383409  | no |
| OR10H5    | -0.03280034  | -0.866420023 | 0.386558017 | 0.483927554 | no |
| BOLL      | -0.032796426 | -0.866316522 | 0.386614719 | 0.48394506  | no |
| AVPR1B    | -0.03279607  | -0.866307113 | 0.386619874 | 0.48394506  | no |
| C7orf66   | 0.032787368  | 0.866076991  | 0.386745962 | 0.484072918 | no |
| REG1A     | 0.032769862  | 0.865614087  | 0.386999671 | 0.484321892 | no |
| NBPF9     | 0.032769677  | 0.865609179  | 0.387002362 | 0.484321892 | no |
| FKBP6     | 0.032768685  | 0.865582946  | 0.387016742 | 0.484321892 | no |
| ADAM2     | 0.032756048  | 0.865248792  | 0.387199954 | 0.484521178 | no |
| CT45A6    | -0.032713803 | -0.864131701 | 0.387812824 | 0.485258057 | no |
| ISX       | -0.032691559 | -0.863543511 | 0.388135761 | 0.485632082 | no |
| IFNW1     | 0.032683498  | 0.863330337  | 0.388252842 | 0.485748512 | no |
| NOTO      | 0.032680116  | 0.863240897  | 0.388301971 | 0.485779917 | no |
| EBP       | 0.032671509  | 0.863013321  | 0.388426995 | 0.48590626  | no |
| SASS6     | 0.032669469  | 0.862959381  | 0.388456632 | 0.48591327  | no |
| CDX4      | -0.032663198 | -0.862793546 | 0.388547756 | 0.485997187 | no |
| OR8H1     | 0.032656478  | 0.862615852  | 0.388645412 | 0.486089263 | no |
| STX12     | 0.032648985  | 0.862417712  | 0.388754322 | 0.486195402 | no |

|              |              |              |             |             |    |
|--------------|--------------|--------------|-------------|-------------|----|
| UTP23        | -0.03264583  | -0.862334291 | 0.388800181 | 0.486222679 | no |
| TAS2R7       | 0.032636059  | 0.862075917  | 0.388942237 | 0.486370247 | no |
| C1orf103     | 0.032632781  | 0.861989217  | 0.388989913 | 0.486399781 | no |
| PIP5K1P1     | -0.032630316 | -0.861924039 | 0.389025756 | 0.486414517 | no |
| RBMS3        | 0.032613762  | 0.861486314  | 0.389266525 | 0.486685461 | no |
| PRAMEF20     | -0.032599623 | -0.861112432 | 0.389472249 | 0.486912561 | no |
| LMO4         | 0.032587281  | 0.860786071  | 0.38965188  | 0.487107012 | no |
| SERPINB13    | 0.03257951   | 0.860580595  | 0.389765001 | 0.4872183   | no |
| HIST1H2AH    | 0.032571971  | 0.860381233  | 0.389874775 | 0.48732539  | no |
| KCNJ14       | 0.032543512  | 0.859628711  | 0.390289303 | 0.487802573 | no |
| CACNA1F      | -0.03254245  | -0.859600609 | 0.390304789 | 0.487802573 | no |
| CSNK2A1P     | -0.032532889 | -0.859347792 | 0.390444117 | 0.487922972 | no |
| C17orf90     | -0.032532527 | -0.859338225 | 0.39044939  | 0.487922972 | no |
| ARPC5L       | 0.032522749  | 0.859079665  | 0.390591916 | 0.488062462 | no |
| C14orf49     | -0.032521557 | -0.859048144 | 0.390609293 | 0.488062462 | no |
| LOC728276    | 0.032497827  | 0.858420677  | 0.390955313 | 0.488464622 | no |
| TPRG1L       | -0.032495884 | -0.858369281 | 0.390983663 | 0.488469858 | no |
| CNOT10       | 0.032491036  | 0.858241098  | 0.391054377 | 0.488528014 | no |
| PSG5         | -0.032483785 | -0.858049369 | 0.39116016  | 0.488602496 | no |
| RBBP4        | 0.032482152  | 0.858006172  | 0.391183995 | 0.488602496 | no |
| LOC285194    | -0.03248198  | -0.858001638 | 0.391186497 | 0.488602496 | no |
| AFMID        | 0.032446895  | 0.85707389   | 0.391698634 | 0.489211946 | no |
| KRTAP10-5    | -0.032424301 | -0.85647645  | 0.392028649 | 0.489593874 | no |
| LIPJ         | -0.032407098 | -0.856021548 | 0.392280042 | 0.489877572 | no |
| TAS2R9       | -0.032403213 | -0.855918831 | 0.392336821 | 0.489918216 | no |
| CNGA4        | -0.032395168 | -0.855706091 | 0.392454431 | 0.490034813 | no |
| CYP2C9       | 0.032387178  | 0.85549484   | 0.39257124  | 0.490150394 | no |
| DUOX1        | -0.032378518 | -0.855265845 | 0.392697884 | 0.49027824  | no |
| GRB7         | 0.032371125  | 0.855070337  | 0.392806028 | 0.490382974 | no |
| ANO2         | 0.032358912  | 0.85474741   | 0.392984692 | 0.490575729 | no |
| SLC01C1      | -0.032345544 | -0.854393919 | 0.393180323 | 0.490789639 | no |
| C12orf39     | -0.032336293 | -0.854149313 | 0.393315729 | 0.490928349 | no |
| TMEM191A     | -0.032325482 | -0.853863435 | 0.393474017 | 0.491073297 | no |
| TPTE         | -0.032325043 | -0.853851847 | 0.393480434 | 0.491073297 | no |
| BRMS1        | 0.03231538   | 0.853596335  | 0.393621943 | 0.491217262 | no |
| BLMH         | -0.032313848 | -0.853555828 | 0.39364438  | 0.491217262 | no |
| RPPH1        | 0.032311721  | 0.853499584  | 0.393675535 | 0.49122582  | no |
| C19orf62     | -0.032309886 | -0.853451057 | 0.393702416 | 0.491229045 | no |
| RANBP6       | -0.032298563 | -0.853151646 | 0.393868298 | 0.491405692 | no |
| LOC641298    | 0.032286355  | 0.852828837  | 0.39404719  | 0.491598549 | no |
| PNLIPRP1     | -0.032261185 | -0.852163307 | 0.394416164 | 0.492028507 | no |
| ZNF568       | 0.032230933  | 0.851363373  | 0.39485993  | 0.492551707 | no |
| CT45A4       | -0.032226475 | -0.8512455   | 0.394925346 | 0.492602915 | no |
| HYALP1       | 0.032206084  | 0.850706311  | 0.395224664 | 0.492945851 | no |
| C20orf196    | -0.032164107 | -0.849596383 | 0.395841245 | 0.49368443  | no |
| ANTXR1       | -0.032150529 | -0.849237355 | 0.396040815 | 0.493902862 | no |
| SLC44A4      | 0.032137191  | 0.848884662  | 0.396236923 | 0.49411695  | no |
| ADAM3A       | 0.032124418  | 0.848546914  | 0.396424776 | 0.494320718 | no |
| CCDC57       | -0.032119702 | -0.848422223 | 0.396494142 | 0.494376723 | no |
| TMEM63B      | -0.032115273 | -0.848305128 | 0.396559289 | 0.494427461 | no |
| LOC100271832 | 0.032107498  | 0.848099529  | 0.396673691 | 0.494530245 | no |

|              |              |              |             |             |    |
|--------------|--------------|--------------|-------------|-------------|----|
| EN2          | 0.032106346  | 0.84806906   | 0.396690647 | 0.494530245 | no |
| PCDHGB2      | -0.032096048 | -0.847796766 | 0.396842196 | 0.494688669 | no |
| FERD3L       | 0.032093116  | 0.847719237  | 0.396885352 | 0.494711964 | no |
| RANBP10      | -0.03208159  | -0.847414479 | 0.397055022 | 0.494892943 | no |
| CMAS         | -0.032079821 | -0.847367709 | 0.397081064 | 0.494894893 | no |
| PHKB         | 0.032061928  | 0.846894597  | 0.39734456  | 0.49519277  | no |
| MRPS35       | 0.032053514  | 0.846672098  | 0.397468515 | 0.495316718 | no |
| NPW          | -0.032044262 | -0.846427465 | 0.397604828 | 0.49545605  | no |
| LOC651250    | -0.03204177  | -0.846361576 | 0.397641548 | 0.495471269 | no |
| SPRR2F       | -0.031999028 | -0.845231436 | 0.398271681 | 0.496225849 | no |
| LOC390858    | 0.031978394  | 0.844685827  | 0.398576113 | 0.496573899 | no |
| CGB8         | 0.031976765  | 0.84464276   | 0.398600149 | 0.496573899 | no |
| NOL6         | 0.03197286   | 0.844539507  | 0.398657778 | 0.496615092 | no |
| OR4N5        | -0.03195522  | -0.844073095 | 0.398918164 | 0.496892281 | no |
| COMMD9       | 0.031954456  | 0.844052893  | 0.398929444 | 0.496892281 | no |
| LRIG2        | -0.031939724 | -0.843663351 | 0.399146997 | 0.497132631 | no |
| BCL8         | -0.031924284 | -0.84325509  | 0.399375082 | 0.497386067 | no |
| DICER1       | -0.031919038 | -0.84311638  | 0.399452594 | 0.497428711 | no |
| TBCK         | 0.031918636  | 0.843105757  | 0.39945853  | 0.497428711 | no |
| MAGED2       | -0.031912857 | -0.842952964 | 0.399543922 | 0.497504405 | no |
| CASC2        | -0.031901355 | -0.842648833 | 0.399713926 | 0.497685439 | no |
| PRR23B       | -0.031897726 | -0.842552881 | 0.399767571 | 0.497721581 | no |
| BMP3         | -0.031893864 | -0.842450758 | 0.399824671 | 0.49776202  | no |
| C19orf23     | 0.03188887   | 0.842318706  | 0.399898511 | 0.497823293 | no |
| FAM200A      | 0.031887181  | 0.842274043  | 0.399923488 | 0.497823734 | no |
| GP1BA        | 0.03188424   | 0.842196301  | 0.399966965 | 0.497847202 | no |
| MT1B         | -0.031867985 | -0.841766489 | 0.400207389 | 0.498115796 | no |
| CCDC79       | -0.031862186 | -0.841613166 | 0.400293175 | 0.498191899 | no |
| ZNF398       | -0.03184177  | -0.841073349 | 0.400595294 | 0.498537219 | no |
| FARSB        | -0.031839244 | -0.841006549 | 0.40063269  | 0.49855307  | no |
| AIFM1        | 0.031824103  | 0.840606219  | 0.400856844 | 0.498801309 | no |
| PDE3B        | 0.0318057    | 0.840119617  | 0.401129405 | 0.499109749 | no |
| CST11        | -0.031797116 | -0.839892659 | 0.40125657  | 0.499218203 | no |
| MUC15        | 0.031796483  | 0.839875916  | 0.401265952 | 0.499218203 | no |
| LOC100240734 | 0.031779132  | 0.839417146  | 0.401523078 | 0.499507359 | no |
| OR4D6        | -0.031771496 | -0.839215232 | 0.401636276 | 0.499617439 | no |
| EML6         | -0.031758796 | -0.83887943  | 0.401824578 | 0.499820925 | no |
| CHCHD4       | -0.031733213 | -0.838203005 | 0.402204045 | 0.500262159 | no |
| KRTAP25-1    | 0.031718773  | 0.837821205  | 0.402418326 | 0.500436322 | no |
| OR5R1        | 0.031718773  | 0.837821205  | 0.402418326 | 0.500436322 | no |
| OR6Y1        | 0.031718773  | 0.837821205  | 0.402418326 | 0.500436322 | no |
| PBX2         | 0.031696632  | 0.83723578   | 0.402747023 | 0.500814276 | no |
| PIPSL        | -0.031694643 | -0.837183185 | 0.402776561 | 0.500820204 | no |
| ARHGAP42     | -0.031689415 | -0.837044962 | 0.402854196 | 0.500885931 | no |
| SLC9A3R1     | -0.031686352 | -0.836963973 | 0.402899688 | 0.500895439 | no |
| HBA2         | 0.031685564  | 0.836943137  | 0.402911392 | 0.500895439 | no |
| RBPJL        | -0.031681682 | -0.836840486 | 0.402969058 | 0.500936327 | no |
| SH3RF2       | 0.031677608  | 0.836732783  | 0.403029567 | 0.500980744 | no |
| SENPI        | 0.03164443   | 0.835855519  | 0.403522631 | 0.501562803 | no |
| CSTT         | 0.03163719   | 0.835664096  | 0.403630268 | 0.50166575  | no |
| RNF212       | 0.031613383  | 0.835034642  | 0.40398433  | 0.502074944 | no |



|           |              |              |             |             |    |
|-----------|--------------|--------------|-------------|-------------|----|
| LOC283404 | -0.031555141 | -0.833494706 | 0.404851315 | 0.503121512 | no |
| PKDCC     | 0.031542207  | 0.833152719  | 0.405044005 | 0.503330037 | no |
| EIF4E3    | -0.031538599 | -0.833057332 | 0.40509776  | 0.503365897 | no |
| OR10K2    | -0.03152051  | -0.832579059 | 0.405367353 | 0.503659564 | no |
| LRRC10    | -0.031519399 | -0.832549675 | 0.40538392  | 0.503659564 | no |
| C3orf43   | 0.031502776  | 0.832110153  | 0.40563177  | 0.503936533 | no |
| C19orf77  | -0.031498758 | -0.832003934 | 0.405691682 | 0.503979995 | no |
| SFRS1     | -0.031481678 | -0.831552336 | 0.405946459 | 0.504265514 | no |
| LOC150527 | 0.031473833  | 0.83134491   | 0.406063515 | 0.504379931 | no |
| CCBE1     | -0.031454454 | -0.830832522 | 0.406352754 | 0.504708194 | no |
| C6orf129  | -0.031446178 | -0.830613696 | 0.406476317 | 0.504830652 | no |
| SLC6A10P  | -0.03143869  | -0.830415718 | 0.406588127 | 0.504938499 | no |
| FZD9      | -0.031424962 | -0.830052752 | 0.406793164 | 0.505162103 | no |
| CTDP1     | 0.031422494  | 0.829987501  | 0.406830031 | 0.505176856 | no |
| ISY1      | 0.031410271  | 0.829664327  | 0.407012651 | 0.505372584 | no |
| PRG3      | 0.031399617  | 0.829382629  | 0.407171875 | 0.505511036 | no |
| KIAA0556  | 0.031398135  | 0.829343448  | 0.407194024 | 0.505511036 | no |
| LIN9      | -0.031397791 | -0.829334352 | 0.407199166 | 0.505511036 | no |
| FAM25A    | -0.031389663 | -0.829119454 | 0.407320662 | 0.505630819 | no |
| C21orf130 | 0.031385483  | 0.829008936  | 0.407383154 | 0.505677345 | no |
| OR51G2    | -0.031383377 | -0.828953251 | 0.407414642 | 0.505685385 | no |
| SEMA3E    | 0.031380119  | 0.828867117  | 0.407463353 | 0.505703767 | no |
| GOLGA4    | 0.031379041  | 0.828838605  | 0.407479477 | 0.505703767 | no |
| TBC1D12   | -0.031370765 | -0.828619794 | 0.407603236 | 0.505826309 | no |
| RNF25     | 0.031339204  | 0.827785323  | 0.408075419 | 0.506381195 | no |
| ALDH4A1   | -0.031329323 | -0.827524073 | 0.408223313 | 0.506533629 | no |
| PRAMEF11  | 0.031308321  | 0.826968782  | 0.408537771 | 0.506892707 | no |
| RBM42     | 0.031297729  | 0.826688741  | 0.408696412 | 0.507058423 | no |
| FAM27C    | -0.03128552  | -0.82636595  | 0.408879315 | 0.507254219 | no |
| COL4A4    | -0.031275157 | -0.826091951 | 0.40903461  | 0.507415741 | no |
| ZNF521    | -0.03125731  | -0.825620082 | 0.409302134 | 0.507716458 | no |
| FOXE3     | 0.031238976  | 0.82513535   | 0.409577059 | 0.508026318 | no |
| SCGN      | -0.031230841 | -0.824920253 | 0.409699092 | 0.508121563 | no |
| NYX       | -0.031230506 | -0.824911406 | 0.409704111 | 0.508121563 | no |
| LOC150381 | 0.031222715  | 0.82470541   | 0.409821001 | 0.508235355 | no |
| BTBD1     | 0.031218284  | 0.824588254  | 0.409887488 | 0.508286631 | no |
| C7orf71   | -0.031207982 | -0.824315888 | 0.410042084 | 0.508447155 | no |
| CACNG6    | -0.031203608 | -0.824200226 | 0.410107745 | 0.508497386 | no |
| SFI1      | -0.031196128 | -0.824002465 | 0.410220027 | 0.508605415 | no |
| TRIM53    | -0.031191934 | -0.823891583 | 0.41028299  | 0.508652287 | no |
| ADAMTS16  | 0.031184169  | 0.823686286  | 0.410399581 | 0.508765634 | no |
| C15orf32  | 0.031179258  | 0.823556443  | 0.410473331 | 0.508796583 | no |
| FLJ37543  | -0.031179155 | -0.823553722 | 0.410474877 | 0.508796583 | no |
| C8orf79   | -0.031171661 | -0.823355588 | 0.410587431 | 0.508904897 | no |
| RPE65     | -0.03116293  | -0.82312474  | 0.410718592 | 0.509036258 | no |
| NUDT5     | 0.03114456   | 0.822639041  | 0.410994633 | 0.509332731 | no |
| PLEKHA6   | -0.031143658 | -0.822615199 | 0.411008186 | 0.509332731 | no |
| RERGL     | 0.031124285  | 0.822102995  | 0.411299417 | 0.509662393 | no |
| C11orf36  | -0.031116996 | -0.821910274 | 0.411409026 | 0.509766973 | no |
| ANGPTL7   | 0.031107648  | 0.821663124  | 0.411549618 | 0.509909926 | no |
| HULC      | 0.03108497   | 0.821063539  | 0.41189081  | 0.510301391 | no |

|           |              |              |             |             |    |
|-----------|--------------|--------------|-------------|-------------|----|
| MRAS      | -0.031076967 | -0.820851956 | 0.412011252 | 0.510403838 | no |
| OR1L4     | -0.031076121 | -0.82082958  | 0.41202399  | 0.510403838 | no |
| EPB41L3   | 0.031072951  | 0.820745778  | 0.4120717   | 0.510431665 | no |
| C14orf156 | -0.031054964 | -0.820270214 | 0.41234251  | 0.510735824 | no |
| SNAP29    | 0.03104212   | 0.81993063   | 0.41253595  | 0.510944121 | no |
| FBXL3     | 0.03102927   | 0.819590892  | 0.412729532 | 0.511136407 | no |
| TCP10L2   | -0.031027639 | -0.819547769 | 0.412754107 | 0.511136407 | no |
| HIST1H1B  | 0.03102678   | 0.819525067  | 0.412767045 | 0.511136407 | no |
| LY6G6C    | -0.031016622 | -0.819256501 | 0.41292012  | 0.511294646 | no |
| NSA2      | 0.030990361  | 0.818562177  | 0.41331602  | 0.511753524 | no |
| OR10H3    | -0.030980339 | -0.81829721  | 0.413467162 | 0.511909313 | no |
| ASB4      | -0.030973949 | -0.81812827  | 0.413563546 | 0.511997292 | no |
| CELA2B    | -0.030968489 | -0.817983905 | 0.41364592  | 0.512067916 | no |
| CASP12    | 0.030955532  | 0.817641334  | 0.413841428 | 0.512278577 | no |
| PAGE3     | 0.030948812  | 0.817463662  | 0.413942848 | 0.51237275  | no |
| HIST1H4L  | 0.030933547  | 0.817060074  | 0.414173283 | 0.512626595 | no |
| VHLL      | -0.030920322 | -0.81671042  | 0.414372985 | 0.512842373 | no |
| SERPINB11 | -0.030916869 | -0.816619153 | 0.41442512  | 0.512875502 | no |
| MUC7      | -0.030909085 | -0.816413344 | 0.414542702 | 0.512989616 | no |
| SNORA71A  | 0.030904696  | 0.816297304  | 0.414609006 | 0.513040264 | no |
| RRN3P3    | 0.030900627  | 0.816189719  | 0.414670484 | 0.513084935 | no |
| SNORA71D  | 0.030869876  | 0.815376707  | 0.415135246 | 0.513628567 | no |
| SLC7A3    | 0.030857994  | 0.815062577  | 0.415314903 | 0.513819404 | no |
| NTF3      | 0.03085391   | 0.814954605  | 0.415376664 | 0.51386437  | no |
| DRGX      | -0.030842795 | -0.814660725 | 0.415544796 | 0.514040914 | no |
| CST9      | -0.030834537 | -0.814442411 | 0.415669722 | 0.514163991 | no |
| DHFR      | -0.030825213 | -0.814195877 | 0.415810823 | 0.514301802 | no |
| DECR1     | 0.030823813  | 0.814158864  | 0.415832009 | 0.514301802 | no |
| MBTPS2    | -0.030813866 | -0.81389588  | 0.41598256  | 0.514456533 | no |
| RAMP2     | -0.030810351 | -0.813802959 | 0.416035763 | 0.514490859 | no |
| SPANXE    | 0.030794159  | 0.813374881  | 0.416280914 | 0.51476254  | no |
| ALOX12    | 0.030784438  | 0.813117858  | 0.416428147 | 0.51491311  | no |
| ZFYVE26   | 0.030762546  | 0.812539085  | 0.416759803 | 0.515291689 | no |
| C2orf57   | 0.030739885  | 0.811939958  | 0.417103286 | 0.515684843 | no |
| OR2M7     | -0.030721919 | -0.811464958 | 0.417375726 | 0.515990121 | no |
| MED23     | -0.03070963  | -0.81114008  | 0.417562123 | 0.516188994 | no |
| C17orf80  | -0.030697071 | -0.810808049 | 0.417752674 | 0.516392979 | no |
| STRADB    | -0.030680055 | -0.810358165 | 0.418010943 | 0.516680641 | no |
| PAGE2     | -0.030664728 | -0.809952949 | 0.41824365  | 0.516936674 | no |
| SGK3      | 0.030660059  | 0.809829502  | 0.418314557 | 0.516992709 | no |
| CATSPER3  | -0.030656044 | -0.809723367 | 0.418375528 | 0.517036456 | no |
| HILS1     | 0.030643367  | 0.809388194  | 0.418568103 | 0.517236467 | no |
| MORC1     | 0.030642021  | 0.809352633  | 0.418588538 | 0.517236467 | no |
| CDC42EP2  | 0.030635081  | 0.809169128  | 0.418693997 | 0.517335161 | no |
| MTF2      | 0.030624811  | 0.808897623  | 0.418850059 | 0.517496363 | no |
| TBX2      | 0.030622367  | 0.808833016  | 0.4188872   | 0.517510627 | no |
| CCDC149   | -0.030608493 | -0.808466213 | 0.419098103 | 0.517733436 | no |
| COBL      | -0.030607134 | -0.808430288 | 0.419118763 | 0.517733436 | no |
| DLEU2L    | -0.030601962 | -0.808293531 | 0.419197414 | 0.517798956 | no |
| OVCH2     | -0.030595401 | -0.80812009  | 0.419297174 | 0.517890541 | no |
| ZNF311    | -0.030591989 | -0.808029887 | 0.419349063 | 0.51792299  | no |

|          |              |              |             |             |    |
|----------|--------------|--------------|-------------|-------------|----|
| EZH2     | 0.030588446  | 0.807936205  | 0.419402957 | 0.517957913 | no |
| S100G    | -0.030584447 | -0.807830483 | 0.419463783 | 0.51800139  | no |
| EIF4G3   | -0.030571206 | -0.807480418 | 0.419665224 | 0.5182185   | no |
| ERCC8    | 0.030562786  | 0.807257816  | 0.419793348 | 0.518345054 | no |
| RAG2     | -0.030551588 | -0.806961771 | 0.41996378  | 0.518523829 | no |
| GOLGA8G  | 0.030547798  | 0.806861579  | 0.420021469 | 0.518563389 | no |
| DCAF17   | 0.030542922  | 0.806732643  | 0.420095716 | 0.518623385 | no |
| ZNF271   | -0.030533394 | -0.806480768 | 0.420240777 | 0.518770792 | no |
| PRIM1    | 0.030528729  | 0.806357419  | 0.420311829 | 0.518826824 | no |
| TRMT6    | 0.03051352   | 0.805955327  | 0.420543489 | 0.51908109  | no |
| PLXNA3   | 0.030502559  | 0.805665557  | 0.420710482 | 0.519255512 | no |
| SNORA16B | 0.030497189  | 0.805523576  | 0.42079232  | 0.519324816 | no |
| PPP1R15B | 0.03049425   | 0.805445887  | 0.420837104 | 0.519348384 | no |
| S100A7   | -0.030487973 | -0.805279944 | 0.420932771 | 0.519434739 | no |
| GPR135   | -0.03048553  | -0.80521534  | 0.420970019 | 0.519446224 | no |
| TRYX3    | -0.030483992 | -0.805174681 | 0.420993463 | 0.519446224 | no |
| FAM83A   | -0.030480367 | -0.805078859 | 0.421048715 | 0.519482695 | no |
| ZSWIM7   | -0.030461681 | -0.804584832 | 0.421333647 | 0.519802519 | no |
| RXFP2    | -0.030444178 | -0.804122095 | 0.421600634 | 0.520100166 | no |
| COX6C    | -0.030421579 | -0.803524644 | 0.421945496 | 0.520463057 | no |
| GPR137B  | -0.030421528 | -0.803523279 | 0.421946284 | 0.520463057 | no |
| AOX2P    | -0.03041822  | -0.803435824 | 0.421996779 | 0.520493587 | no |
| KRTAP4-7 | -0.030409266 | -0.803199103 | 0.422133475 | 0.520630427 | no |
| LGI4     | 0.030400674  | 0.802971954  | 0.422264668 | 0.520760465 | no |
| TRAPPC10 | 0.030397707  | 0.802893524  | 0.422309972 | 0.520784569 | no |
| RPS5     | 0.03037075   | 0.80218086   | 0.422721762 | 0.521230414 | no |
| RPSAP9   | 0.030370664  | 0.802178592  | 0.422723073 | 0.521230414 | no |
| C2orf44  | -0.030366064 | -0.802056974 | 0.42279337  | 0.521272077 | no |
| SNORA37  | 0.030365079  | 0.802030923  | 0.422808428 | 0.521272077 | no |
| FAM55D   | 0.030335465  | 0.801248023  | 0.423261128 | 0.521798384 | no |
| RBMXL2   | 0.03033041   | 0.801114362  | 0.423338444 | 0.521861878 | no |
| RSP02    | -0.030315711 | -0.800725778 | 0.423563266 | 0.52207307  | no |
| PNPLA8   | -0.030314974 | -0.800706297 | 0.423574539 | 0.52207307  | no |
| OR2AT4   | 0.030312885  | 0.800651052  | 0.423606509 | 0.52207307  | no |
| KIAA0586 | -0.030311765 | -0.800621449 | 0.423623639 | 0.52207307  | no |
| ASNS     | -0.030309547 | -0.800562816 | 0.423657572 | 0.52207307  | no |
| RNF186   | -0.030309081 | -0.800550503 | 0.423664698 | 0.52207307  | no |
| SEPT7P2  | 0.030301075  | 0.800338841  | 0.423787205 | 0.522192206 | no |
| GAGE12J  | -0.030295079 | -0.80018031  | 0.423878975 | 0.522273455 | no |
| LARP1B   | 0.030292007  | 0.800099098  | 0.423925991 | 0.522299554 | no |
| HIST1H3F | 0.030272409  | 0.799580992  | 0.42422601  | 0.522637345 | no |
| SLC24A5  | -0.030265627 | -0.799401689 | 0.424329867 | 0.522733442 | no |
| RAB28    | -0.030260901 | -0.799276752 | 0.424402244 | 0.522790749 | no |
| OR5A1    | -0.030257241 | -0.79917999  | 0.424458303 | 0.52282795  | no |
| WDR36    | 0.030249631  | 0.798978804  | 0.424574874 | 0.522939677 | no |
| ADAM23   | 0.030231461  | 0.798498457  | 0.424853273 | 0.523250699 | no |
| GULP1    | 0.030225342  | 0.79833669   | 0.424947054 | 0.523304805 | no |
| IFNK     | 0.030225217  | 0.798333385  | 0.42494897  | 0.523304805 | no |
| ABHD1    | 0.030223127  | 0.798278122  | 0.424981011 | 0.523312387 | no |
| UGT2B28  | -0.03021709  | -0.798118523 | 0.425073551 | 0.523372354 | no |
| TAZ      | -0.030216573 | -0.798104844 | 0.425081483 | 0.523372354 | no |

|            |              |              |             |             |    |
|------------|--------------|--------------|-------------|-------------|----|
| PMCHL1     | -0.030213997 | -0.798036745 | 0.425120973 | 0.523389102 | no |
| NPY6R      | -0.030198208 | -0.797619336 | 0.42536307  | 0.523655273 | no |
| OR5AN1     | -0.030187642 | -0.797340018 | 0.42552512  | 0.523822874 | no |
| FBN2       | 0.030183316  | 0.797225632  | 0.425591493 | 0.523870993 | no |
| C14orf115  | 0.030181716  | 0.797183345  | 0.425616031 | 0.523870993 | no |
| WISP3      | -0.030179965 | -0.797137048 | 0.425642898 | 0.523872168 | no |
| SCARNA2    | 0.030175562  | 0.797020649  | 0.42571045  | 0.523923416 | no |
| FCH01      | -0.030166369 | -0.796777613 | 0.425851515 | 0.524065125 | no |
| SCARNA5    | 0.030164582  | 0.796730376  | 0.425878936 | 0.524066971 | no |
| OR5P2      | 0.030157318  | 0.796538338  | 0.425990425 | 0.524172226 | no |
| LOC389791  | -0.030154917 | -0.796474861 | 0.42602728  | 0.524185708 | no |
| BCAR3      | 0.030150395  | 0.796355323  | 0.426096691 | 0.524239207 | no |
| GABRG3     | -0.030143625 | -0.796176342 | 0.426200629 | 0.524335178 | no |
| MDP1       | 0.030133284  | 0.795902959  | 0.426359417 | 0.524439249 | no |
| KIF3B      | -0.030133143 | -0.795899238 | 0.426361579 | 0.524439249 | no |
| OR8S1      | -0.030133048 | -0.795896723 | 0.42636304  | 0.524439249 | no |
| EPN1       | -0.030121597 | -0.795593994 | 0.426538915 | 0.524623663 | no |
| ZBED1      | -0.030116175 | -0.795450657 | 0.426622203 | 0.524694185 | no |
| NCRNA00161 | -0.030112742 | -0.795359897 | 0.426674946 | 0.524727132 | no |
| GNAT3      | -0.030105046 | -0.795156435 | 0.426793196 | 0.524840632 | no |
| NDUFAP2    | -0.030101281 | -0.795056909 | 0.426851046 | 0.524879848 | no |
| GLTPD1     | 0.030095869  | 0.794913825  | 0.426934223 | 0.524950199 | no |
| EPHA5      | -0.030093632 | -0.794854681 | 0.426968608 | 0.524960551 | no |
| OR5AK2     | -0.030086892 | -0.79467649  | 0.427072211 | 0.525049461 | no |
| DPH5       | 0.030085548  | 0.794640979  | 0.42709286  | 0.525049461 | no |
| SGK2       | -0.030049905 | -0.793698691 | 0.427640982 | 0.525691334 | no |
| CAPN9      | 0.030037482  | 0.793370272  | 0.427832117 | 0.525894318 | no |
| NLRP14     | -0.030035765 | -0.793324879 | 0.427858539 | 0.525894823 | no |
| OR52B6     | 0.030029297  | 0.79315389   | 0.427958075 | 0.52598519  | no |
| CCDC127    | 0.030022173  | 0.792965543  | 0.428067732 | 0.526087983 | no |
| C22orf40   | 0.030003441  | 0.792470356  | 0.428356111 | 0.526410398 | no |
| OR4C13     | -0.029960747 | -0.791341663 | 0.429013845 | 0.527155407 | no |
| PLEKHH2    | -0.029960172 | -0.791326467 | 0.429022704 | 0.527155407 | no |
| SNORA10    | 0.029959013  | 0.791295825  | 0.429040569 | 0.527155407 | no |
| LRWD1      | 0.029951719  | 0.791102997  | 0.429153    | 0.527261506 | no |
| KCNK16     | 0.029945362  | 0.790934936  | 0.429251004 | 0.52734987  | no |
| ZNF673     | 0.029938372  | 0.790750171  | 0.429358765 | 0.527450207 | no |
| FBX036     | 0.029928568  | 0.790490985  | 0.429509956 | 0.527603882 | no |
| ANAPC5     | -0.029917833 | -0.790207174 | 0.429675548 | 0.527775227 | no |
| P2RY12     | 0.029912777  | 0.790073524  | 0.42975354  | 0.527838957 | no |
| RFX2       | 0.029909739  | 0.789993202  | 0.429800416 | 0.527864464 | no |
| ALDOA      | -0.029898734 | -0.789702286 | 0.42997022  | 0.528040935 | no |
| RPS20      | -0.029895713 | -0.789622411 | 0.430016849 | 0.528066123 | no |
| BRS3       | -0.029889529 | -0.789458935 | 0.430112292 | 0.528151249 | no |
| THPO       | -0.029885331 | -0.789347961 | 0.430177089 | 0.528198736 | no |
| C11orf83   | -0.029877883 | -0.789151057 | 0.430292074 | 0.528307836 | no |
| XRCC6      | 0.029865758  | 0.788830532  | 0.430479287 | 0.5285056   | no |
| FSCN3      | 0.02986323   | 0.7887637    | 0.430518329 | 0.528521438 | no |
| FRAS1      | -0.029849671 | -0.788405229 | 0.430727773 | 0.528746455 | no |
| LYPD1      | 0.029846575  | 0.788323399  | 0.430775592 | 0.528773051 | no |
| CDK4       | 0.029821049  | 0.787648582  | 0.431170054 | 0.529225119 | no |

|              |              |              |             |             |    |
|--------------|--------------|--------------|-------------|-------------|----|
| C14orf138    | -0.029802627 | -0.787161576 | 0.431454862 | 0.529542549 | no |
| OR2A5        | -0.029794303 | -0.786941541 | 0.431583578 | 0.529668374 | no |
| ARHGAP26     | 0.029768696  | 0.786264594  | 0.431979717 | 0.530122362 | no |
| PBX4         | 0.029763106  | 0.786116819  | 0.43206622  | 0.530196337 | no |
| EDDM3B       | 0.029760051  | 0.786036055  | 0.432113502 | 0.530222175 | no |
| LCE3D        | -0.029756368 | -0.785938677 | 0.432170513 | 0.530259949 | no |
| PIWIL2       | -0.029722483 | -0.785042898 | 0.432695168 | 0.530845428 | no |
| HIST1H3A     | 0.029720502  | 0.784990529  | 0.432725852 | 0.530845428 | no |
| SNORD67      | -0.029720463 | -0.784989497 | 0.432726456 | 0.530845428 | no |
| HAUS7        | -0.029711495 | -0.784752443 | 0.432865366 | 0.530983616 | no |
| FKSG73       | -0.029686309 | -0.784086633 | 0.433255656 | 0.531430131 | no |
| SIPA1L3      | 0.029680156  | 0.783923956  | 0.433351047 | 0.531514891 | no |
| OTOF         | -0.029670619 | -0.783671844 | 0.433498904 | 0.531663988 | no |
| IGSF5        | -0.029666364 | -0.783487452 | 0.433607064 | 0.531764383 | no |
| OR7E156P     | -0.029659277 | -0.783372005 | 0.433674791 | 0.531815183 | no |
| OR52I1       | -0.029649333 | -0.783109141 | 0.433829021 | 0.531972049 | no |
| HBA1         | 0.029644234  | 0.782974337  | 0.433908127 | 0.532036783 | no |
| LCN6         | 0.029639023  | 0.782836577  | 0.433988976 | 0.532103646 | no |
| OR13H1       | -0.029637099 | -0.782785722 | 0.434018825 | 0.532107974 | no |
| KCNQ1DN      | -0.029628613 | -0.782561384 | 0.434150509 | 0.532237145 | no |
| HTA          | 0.029616077  | 0.782230004  | 0.434345069 | 0.532443376 | no |
| C6orf25      | 0.029613924  | 0.782173075  | 0.434378499 | 0.532452073 | no |
| DLEU2        | 0.02960519   | 0.781942182  | 0.434514096 | 0.532585995 | no |
| PFDN1        | 0.029588722  | 0.781506843  | 0.434769827 | 0.532867141 | no |
| IFNA13       | -0.029582363 | -0.781338751 | 0.434868592 | 0.532955882 | no |
| SIGMAR1      | -0.029577497 | -0.781210119 | 0.434944181 | 0.533014792 | no |
| MYO15B       | 0.029575875  | 0.781167229  | 0.434969386 | 0.533014792 | no |
| IL34         | -0.029568732 | -0.780978404 | 0.435080364 | 0.533118472 | no |
| NXNL1        | 0.02956099   | 0.780773746  | 0.435200666 | 0.533233565 | no |
| SNRPD1       | -0.029556075 | -0.780643826 | 0.435277045 | 0.533268419 | no |
| SCARNA6      | 0.029555765  | 0.780635629  | 0.435281864 | 0.533268419 | no |
| LCE3E        | -0.029549314 | -0.780465075 | 0.435382144 | 0.533358955 | no |
| NPAS4        | -0.029544489 | -0.780337532 | 0.435457144 | 0.533418512 | no |
| PTPRE        | -0.029540857 | -0.780241521 | 0.435513607 | 0.533455356 | no |
| GTSF1        | 0.029522491  | 0.77975601   | 0.435799195 | 0.533772831 | no |
| OR10A2       | -0.029511801 | -0.77947341  | 0.435965476 | 0.533944148 | no |
| FAM119B      | 0.029507671  | 0.779364234  | 0.436029725 | 0.533990489 | no |
| DMBT1        | -0.029497919 | -0.779106455 | 0.436181446 | 0.534143942 | no |
| FETUB        | 0.02949252   | 0.778963708  | 0.436265475 | 0.53419892  | no |
| WNT3A        | 0.029491639  | 0.77894042   | 0.436279186 | 0.53419892  | no |
| RPS19BP1     | -0.029489938 | -0.778895454 | 0.436305658 | 0.534198982 | no |
| PAK4         | 0.029487201  | 0.778823123  | 0.436348242 | 0.53421877  | no |
| SPANXN2      | -0.029484652 | -0.77875573  | 0.436387921 | 0.534234998 | no |
| NME1         | 0.029482736  | 0.778705072  | 0.436417749 | 0.534239165 | no |
| ZFP91-CNTF   | -0.029477117 | -0.77855655  | 0.436505206 | 0.534313874 | no |
| EGFL7        | -0.029436893 | -0.777493197 | 0.437131655 | 0.535048299 | no |
| TAS1R3       | -0.029424571 | -0.777167486 | 0.437323644 | 0.535250889 | no |
| DDX18        | -0.029417521 | -0.776981108 | 0.437433526 | 0.535330255 | no |
| OR6B2        | -0.029412684 | -0.776853253 | 0.437508913 | 0.535330255 | no |
| LOC100131193 | -0.029412617 | -0.776851461 | 0.43750997  | 0.535330255 | no |
| TEX19        | -0.029412186 | -0.776840079 | 0.437516682 | 0.535330255 | no |

|           |              |              |             |             |    |
|-----------|--------------|--------------|-------------|-------------|----|
| AVP       | 0.029411596  | 0.776824476  | 0.437525883 | 0.535330255 | no |
| C17orf56  | -0.029410218 | -0.776788059 | 0.437547357 | 0.535330255 | no |
| FAM178B   | 0.029407375  | 0.776712899  | 0.43759168  | 0.535352086 | no |
| HEATR5A   | 0.029382549  | 0.776056628  | 0.4379788   | 0.535758338 | no |
| TPO       | 0.029380404  | 0.77599992   | 0.43801226  | 0.535758338 | no |
| WWC2      | 0.02937966   | 0.775980264  | 0.438023858 | 0.535758338 | no |
| GJC2      | -0.029379283 | -0.775970292 | 0.438029742 | 0.535758338 | no |
| CYP11B2   | -0.029373471 | -0.775816657 | 0.438120403 | 0.53583681  | no |
| UBTD2     | 0.029361542  | 0.775501295  | 0.438306533 | 0.536032028 | no |
| FAM133B   | 0.029354399  | 0.77531247   | 0.438418001 | 0.536128764 | no |
| CCDC25    | 0.029353074  | 0.775277465  | 0.438438667 | 0.536128764 | no |
| ZNF121    | 0.029331483  | 0.77470669   | 0.43877572  | 0.536508467 | no |
| CEL       | -0.029326976 | -0.774587562 | 0.438846085 | 0.536562056 | no |
| VKORC1L1  | 0.029324647  | 0.774525998  | 0.438882452 | 0.536574071 | no |
| DECR2     | 0.029322724  | 0.77447516   | 0.438912485 | 0.536578342 | no |
| CAND1     | 0.029304356  | 0.773989606  | 0.439199381 | 0.536896613 | no |
| OR4F29    | 0.029266899  | 0.772999426  | 0.439784777 | 0.537577334 | no |
| HIST1H3I  | 0.029265323  | 0.772957775  | 0.439809411 | 0.537577334 | no |
| ALS2CR11  | 0.0292586    | 0.772780063  | 0.439914526 | 0.53767331  | no |
| RTP2      | 0.029245046  | 0.772421752  | 0.440126506 | 0.537899879 | no |
| CLDN25    | -0.02923956  | -0.77227674  | 0.440212314 | 0.537972229 | no |
| NRADDP    | 0.029230738  | 0.772043524  | 0.440350334 | 0.538108374 | no |
| MC5R      | 0.029222788  | 0.771833386  | 0.440474717 | 0.53822784  | no |
| ABCG1     | -0.029211006 | -0.771521916 | 0.440659118 | 0.538420623 | no |
| SCARNA23  | 0.029204986  | 0.771362783  | 0.440753347 | 0.538503213 | no |
| FASTKD1   | -0.029188437 | -0.770925314 | 0.44101245  | 0.53878722  | no |
| C3orf71   | -0.02917485  | -0.770566147 | 0.441225242 | 0.539014618 | no |
| FAM60A    | -0.02917213  | -0.770494245 | 0.441267848 | 0.539034097 | no |
| FAM138B   | 0.029159199  | 0.770152421  | 0.44147043  | 0.539248983 | no |
| DHX29     | 0.029141772  | 0.769691754  | 0.44174353  | 0.539532932 | no |
| NLGN4X    | -0.02914096  | -0.769670277 | 0.441756264 | 0.539532932 | no |
| C14orf153 | 0.029137792  | 0.769586552  | 0.441805911 | 0.539560972 | no |
| ELOVL2    | 0.02912893   | 0.769352281  | 0.441944843 | 0.539698046 | no |
| LHX8      | 0.029123109  | 0.769198401  | 0.442036114 | 0.539706054 | no |
| KRT82     | 0.029121854  | 0.76916523   | 0.44205579  | 0.539706054 | no |
| MAST4     | -0.029121842 | -0.769164914 | 0.442055977 | 0.539706054 | no |
| DENND1A   | 0.029121702  | 0.769161204  | 0.442058179 | 0.539706054 | no |
| KLK10     | -0.029104818 | -0.768714886 | 0.442322972 | 0.53999673  | no |
| LRCH3     | 0.029102705  | 0.768659054  | 0.442356102 | 0.540004569 | no |
| CBFA2T2   | -0.029092476 | -0.768388659 | 0.442516575 | 0.540167851 | no |
| XRCC1     | -0.029084351 | -0.768173864 | 0.442644074 | 0.540290865 | no |
| EPRS      | -0.029071516 | -0.767834594 | 0.442845502 | 0.540504096 | no |
| GLYATL1   | 0.029064202  | 0.767641239  | 0.442960322 | 0.540611602 | no |
| ZNF799    | 0.029044364  | 0.767116835  | 0.443271816 | 0.54095911  | no |
| ZNF442    | -0.029039889 | -0.76699854  | 0.4433421   | 0.541012227 | no |
| HIST1H2AB | 0.029021605  | 0.766515229  | 0.443629322 | 0.541330052 | no |
| C15orf62  | -0.029016414 | -0.766378001 | 0.443710893 | 0.541396912 | no |
| ZNF549    | -0.029004712 | -0.766068668 | 0.443894798 | 0.54158862  | no |
| PIK3C2B   | -0.028988547 | -0.765641358 | 0.444148915 | 0.541865965 | no |
| KAZALD1   | 0.02897835   | 0.76537181   | 0.444309256 | 0.542028874 | no |
| DEFB123   | -0.028964716 | -0.765011427 | 0.444523681 | 0.54225774  | no |

|              |              |              |             |             |    |
|--------------|--------------|--------------|-------------|-------------|----|
| GNRH2        | 0.028962763  | 0.764959804  | 0.444554401 | 0.542262497 | no |
| SRP72        | 0.028960745  | 0.764906445  | 0.444586156 | 0.542268515 | no |
| NOL3         | 0.028944756  | 0.764483793  | 0.444837726 | 0.542542629 | no |
| TP53         | 0.028916163  | 0.763727963  | 0.445287813 | 0.543058813 | no |
| DDX3Y        | 0.028907491  | 0.763498726  | 0.445424372 | 0.543163956 | no |
| FAM138D      | -0.028907276 | -0.763493045 | 0.445427757 | 0.543163956 | no |
| EFTUD2       | 0.028902595  | 0.763369324  | 0.445501469 | 0.543221078 | no |
| ZC3H11A      | 0.028868057  | 0.762456343  | 0.446045633 | 0.543851804 | no |
| TMC02        | 0.028864943  | 0.762374022  | 0.446094718 | 0.543878852 | no |
| NPM3         | -0.028860812 | -0.762264823 | 0.446159833 | 0.543925441 | no |
| ZNF829       | 0.028838246  | 0.761668322  | 0.446515622 | 0.544299371 | no |
| GLI1         | 0.028837943  | 0.761660321  | 0.446520396 | 0.544299371 | no |
| KCNA10       | 0.028833686  | 0.761547785  | 0.446587538 | 0.544348396 | no |
| AVL9         | -0.028823281 | -0.761272755 | 0.446751652 | 0.544483816 | no |
| ZNF132       | 0.028822828  | 0.761260783  | 0.446758796 | 0.544483816 | no |
| LOC400931    | -0.028821521 | -0.761226209 | 0.44677943  | 0.544483816 | no |
| KIAA1804     | 0.028818231  | 0.761139268  | 0.446831318 | 0.544514229 | no |
| FGF4         | 0.028807765  | 0.760862611  | 0.446996454 | 0.544682637 | no |
| HOXC11       | 0.028799593  | 0.760646585  | 0.447125424 | 0.544806957 | no |
| OTUD6B       | -0.028795032 | -0.760526026 | 0.447197408 | 0.54486183  | no |
| CYP4B1       | -0.028755727 | -0.759487057 | 0.447818038 | 0.545585122 | no |
| CNOT6L       | -0.02875139  | -0.759372399 | 0.44788656  | 0.545635723 | no |
| TMEM11       | 0.028732357  | 0.758869307  | 0.448187285 | 0.545969182 | no |
| RPL23        | -0.028728665 | -0.758771693 | 0.448245647 | 0.54600738  | no |
| ANKMY1       | -0.028722168 | -0.758599972 | 0.448348328 | 0.546099554 | no |
| HIST1H4B     | 0.028714245  | 0.758390537  | 0.448473578 | 0.546219205 | no |
| SNORA38      | 0.028697059  | 0.757936241  | 0.448745332 | 0.546450694 | no |
| FAM75A6      | -0.028696471 | -0.7579207   | 0.448754631 | 0.546450694 | no |
| VEZT         | 0.028695833  | 0.75790383   | 0.448764724 | 0.546450694 | no |
| SP8          | 0.028695388  | 0.757892079  | 0.448771754 | 0.546450694 | no |
| TRMT61B      | 0.028684591  | 0.757606691  | 0.448942524 | 0.546625712 | no |
| NDUFA8       | -0.028667679 | -0.75715965  | 0.449210097 | 0.546918568 | no |
| INTS12       | 0.028659409  | 0.75694103   | 0.449340984 | 0.547037392 | no |
| GPR62        | -0.028658093 | -0.756906251 | 0.449361807 | 0.547037392 | no |
| HIST1H4A     | 0.02865616   | 0.756855151  | 0.449392404 | 0.547041702 | no |
| IFT172       | -0.028647847 | -0.756635415 | 0.449523989 | 0.547168935 | no |
| ST5          | 0.028628462  | 0.756123     | 0.449830925 | 0.547498601 | no |
| COX7B2       | -0.028627321 | -0.756092856 | 0.449848984 | 0.547498601 | no |
| TMPO         | 0.028625284  | 0.75603901   | 0.449881246 | 0.547504908 | no |
| TFDP1        | -0.028612505 | -0.755701219 | 0.45008366  | 0.547718276 | no |
| ANKRD30A     | -0.028610578 | -0.755650269 | 0.450114195 | 0.547722467 | no |
| CABP2        | 0.028604579  | 0.755491704  | 0.450209233 | 0.547805144 | no |
| CASC5        | 0.028599894  | 0.755367849  | 0.450283475 | 0.547862508 | no |
| GNB1         | 0.028592336  | 0.755168089  | 0.450403232 | 0.54797524  | no |
| LOC100190940 | -0.028586238 | -0.755006877 | 0.450499891 | 0.54805986  | no |
| C17orf73     | 0.028548535  | 0.754010274  | 0.451097699 | 0.548754108 | no |
| HK1          | 0.028543502  | 0.75387724   | 0.451177533 | 0.548807328 | no |
| SCGB2A2      | -0.028542354 | -0.753846907 | 0.451195737 | 0.548807328 | no |
| C20orf94     | 0.028534918  | 0.753650339  | 0.451313715 | 0.548917806 | no |
| TMPRSS11F    | 0.02852804   | 0.753468546  | 0.45142284  | 0.549017504 | no |
| GPR81        | 0.028525927  | 0.753412677  | 0.451456381 | 0.549025269 | no |

|              |              |              |             |             |    |
|--------------|--------------|--------------|-------------|-------------|----|
| FIGN         | 0.028498452  | 0.752686434  | 0.451892494 | 0.549522581 | no |
| IFI27L2      | -0.028493589 | -0.752557881 | 0.451969715 | 0.549583431 | no |
| OR8B3        | -0.028481288 | -0.752232742 | 0.452165059 | 0.549787898 | no |
| LOC100128023 | 0.028465068  | 0.751803991  | 0.452422726 | 0.550068115 | no |
| DEFB126      | -0.028450987 | -0.751431799 | 0.452646471 | 0.550307057 | no |
| TTC17        | -0.028440568 | -0.751156399 | 0.452812069 | 0.550475282 | no |
| TMEM95       | 0.02842742   | 0.75080885   | 0.453021099 | 0.550696283 | no |
| OR11H6       | -0.028417261 | -0.750540314 | 0.453182645 | 0.550859539 | no |
| FLJ45079     | -0.02840714  | -0.750272806 | 0.453343604 | 0.551022063 | no |
| ADAM21P1     | 0.028376506  | 0.749463054  | 0.453831029 | 0.55158135  | no |
| OR2G2        | -0.028374038 | -0.749397836 | 0.4538703   | 0.55159592  | no |
| ERCC6        | -0.028366114 | -0.749188367 | 0.453996443 | 0.55171606  | no |
| PHF14        | 0.028358156  | 0.748978028  | 0.45412313  | 0.551836846 | no |
| POTEH        | -0.028348167 | -0.748713993 | 0.454282186 | 0.551996949 | no |
| SPATA2L      | -0.02832128  | -0.748003305 | 0.454710465 | 0.552484146 | no |
| HPX          | 0.028308577  | 0.747667526  | 0.454912893 | 0.552696886 | no |
| OR5D14       | -0.028292781 | -0.747250002 | 0.455164673 | 0.552969557 | no |
| NUDT8        | -0.028287573 | -0.747112324 | 0.455247715 | 0.55303721  | no |
| TM6SF2       | 0.0282713    | 0.746682194  | 0.455507205 | 0.55331582  | no |
| BMP6         | -0.028269758 | -0.746641442 | 0.455531795 | 0.55331582  | no |
| EVX1         | -0.028261261 | -0.746416842 | 0.45566733  | 0.553447199 | no |
| SRRT         | -0.028248227 | -0.746072326 | 0.455875272 | 0.553637001 | no |
| ZNF815       | -0.028248033 | -0.746067202 | 0.455878365 | 0.553637001 | no |
| PRAMEF17     | 0.028240344  | 0.745863956  | 0.456001066 | 0.553752751 | no |
| CIDEC        | 0.02821494   | 0.745192479  | 0.456406572 | 0.554211896 | no |
| TCF15        | -0.028191117 | -0.744562767 | 0.45678704  | 0.554640585 | no |
| EPAS1        | -0.028183289 | -0.744355853 | 0.456912096 | 0.554749987 | no |
| PDE8B        | -0.028182042 | -0.744322893 | 0.456932018 | 0.554749987 | no |
| OGFR         | 0.028168485  | 0.743964551  | 0.457148645 | 0.554963022 | no |
| FKSG29       | 0.028167625  | 0.743941823  | 0.457162387 | 0.554963022 | no |
| HSD17B8      | 0.028126119  | 0.74284473   | 0.457825977 | 0.555735207 | no |
| VAT1L        | -0.02812131  | -0.742717606 | 0.457902904 | 0.55576267  | no |
| IGLL1        | -0.028119785 | -0.742677312 | 0.457927289 | 0.55576267  | no |
| IRS4         | -0.028119392 | -0.742666931 | 0.457933572 | 0.55576267  | no |
| KIAA0114     | -0.028117831 | -0.742625649 | 0.457958556 | 0.55576267  | no |
| TEK          | -0.02809995  | -0.742153039 | 0.458244633 | 0.556076466 | no |
| STAG3L3      | -0.02809711  | -0.742077975 | 0.45829008  | 0.556098238 | no |
| COX4I2       | 0.028093982  | 0.741995282  | 0.458340148 | 0.556125615 | no |
| ZNF460       | 0.028082982  | 0.741704539  | 0.45851621  | 0.556281955 | no |
| AKR7A3       | -0.028082494 | -0.741691631 | 0.458524027 | 0.556281955 | no |
| C2orf76      | 0.028075717  | 0.741512501  | 0.458632521 | 0.556350104 | no |
| SNORA44      | 0.028075547  | 0.74150802   | 0.458635235 | 0.556350104 | no |
| USP17L2      | -0.02806529  | -0.741236893 | 0.458799476 | 0.556515947 | no |
| NDUFV3       | 0.028062368  | 0.741159664  | 0.458846265 | 0.556539312 | no |
| HAUS5        | 0.0280546    | 0.74095434   | 0.458970674 | 0.556656814 | no |
| BRIX1        | 0.028051066  | 0.740860939  | 0.459027273 | 0.556674209 | no |
| C1QL4        | -0.028049079 | -0.740808404 | 0.45905911  | 0.556674209 | no |
| FAM64A       | 0.028048548  | 0.740794366  | 0.459067617 | 0.556674209 | no |
| SLC27A5      | -0.028045615 | -0.740716839 | 0.459114602 | 0.556697795 | no |
| MYADML       | -0.028035107 | -0.740439112 | 0.459282941 | 0.556868515 | no |
| SSX2         | 0.028028015  | 0.740251639  | 0.459396593 | 0.556972914 | no |



|            |              |              |             |             |    |
|------------|--------------|--------------|-------------|-------------|----|
| LASS6      | -0.02801023  | -0.739781564 | 0.459681637 | 0.557285084 | no |
| LOC440563  | -0.028001828 | -0.739559485 | 0.459816336 | 0.557409834 | no |
| CHCHD2     | 0.028000373  | 0.739521004  | 0.459839678 | 0.557409834 | no |
| PAIP2      | 0.027995485  | 0.739391821  | 0.459918045 | 0.557471405 | no |
| PAPL       | 0.027980156  | 0.738986648  | 0.460163885 | 0.557735952 | no |
| HSPA2      | -0.027976259 | -0.738883627 | 0.460226404 | 0.55777829  | no |
| ACTRT2     | -0.027939441 | -0.737910466 | 0.460817217 | 0.558428044 | no |
| ARL5C      | 0.027939407  | 0.737909571  | 0.460817761 | 0.558428044 | no |
| ABCB9      | 0.027933636  | 0.737757032  | 0.460910407 | 0.558498146 | no |
| DHRS12     | -0.027932362 | -0.737723365 | 0.460930857 | 0.558498146 | no |
| ZNF780A    | 0.027928856  | 0.737630708  | 0.46098714  | 0.558532869 | no |
| PHOX2B     | 0.027907839  | 0.737075192  | 0.461324657 | 0.558908313 | no |
| HSBP1      | 0.027890754  | 0.736623593  | 0.46159914  | 0.559207346 | no |
| GSTM5      | 0.027880747  | 0.736359103  | 0.46175994  | 0.559368632 | no |
| C12orf69   | 0.027878911  | 0.73631056   | 0.461789455 | 0.559370871 | no |
| ANXA7      | 0.027873396  | 0.736164804  | 0.461878086 | 0.559444713 | no |
| CDT1       | -0.027865335 | -0.735951737 | 0.462007664 | 0.559568139 | no |
| HIST1H1A   | 0.027857863  | 0.735754231  | 0.462127796 | 0.559680112 | no |
| IRGC       | -0.027852511 | -0.73561278  | 0.462213845 | 0.559750794 | no |
| C1orf107   | 0.027842529  | 0.735348926  | 0.462374377 | 0.559911665 | no |
| CLCN7      | -0.027825523 | -0.734899455 | 0.462647913 | 0.56020935  | no |
| HIST1H2BL  | 0.027796484  | 0.734131914  | 0.463115228 | 0.560741627 | no |
| FKBP1B     | 0.027786503  | 0.733868078  | 0.463275925 | 0.560858783 | no |
| ZSCAN16    | 0.027786211  | 0.733860378  | 0.463280615 | 0.560858783 | no |
| MTOR       | -0.027783751 | -0.733795348 | 0.463320228 | 0.560858783 | no |
| ASTN2      | -0.027783582 | -0.733790881 | 0.463322949 | 0.560858783 | no |
| CDC25A     | -0.027757586 | -0.733103763 | 0.463741627 | 0.561331989 | no |
| RAD9A      | -0.027743924 | -0.732742666 | 0.463961737 | 0.561564798 | no |
| HIST2H2AB  | 0.027739458  | 0.732624634  | 0.464033697 | 0.561618275 | no |
| NPBWR1     | -0.027735512 | -0.732520331 | 0.464097292 | 0.561661622 | no |
| C14orf166B | 0.027724715  | 0.732234961  | 0.464271311 | 0.561838593 | no |
| NHLRC1     | 0.027714128  | 0.731955123  | 0.464441993 | 0.562011504 | no |
| OR1N2      | 0.027702739  | 0.73165411   | 0.464625629 | 0.562200069 | no |
| HOXD4      | 0.027697859  | 0.731525114  | 0.464704336 | 0.562261656 | no |
| NEU2       | -0.027694964 | -0.731448595 | 0.464751028 | 0.5622845   | no |
| CCDC142    | -0.027685318 | -0.731193631 | 0.464906626 | 0.562439095 | no |
| DEFB136    | -0.027666554 | -0.730697703 | 0.465209361 | 0.562771667 | no |
| C7orf10    | 0.027658408  | 0.730482394  | 0.465340829 | 0.562884708 | no |
| ZDHHC20    | 0.027657314  | 0.730453477  | 0.465358488 | 0.562884708 | no |
| CCND3      | 0.027634893  | 0.729860852  | 0.465720459 | 0.56328884  | no |
| CDK20      | 0.027623683  | 0.729564574  | 0.465901483 | 0.563474079 | no |
| HTR4       | 0.027619766  | 0.729461046  | 0.465964747 | 0.563516884 | no |
| HOXD12     | 0.027616909  | 0.729385508  | 0.46601091  | 0.563539002 | no |
| C11orf94   | -0.027614512 | -0.729322177 | 0.466049615 | 0.5635521   | no |
| C19orf21   | -0.027604995 | -0.729070626 | 0.466203369 | 0.563704306 | no |
| TTLL6      | -0.027589871 | -0.728670889 | 0.466447755 | 0.563966075 | no |
| C20orf79   | -0.027567368 | -0.728076096 | 0.466811524 | 0.564372146 | no |
| SNORA23    | 0.02755516   | 0.727753446  | 0.46700892  | 0.564577035 | no |
| PRNT       | -0.02755302  | -0.727696883 | 0.467043529 | 0.564585117 | no |
| SUDS3      | -0.027536428 | -0.727258345 | 0.46731191  | 0.564875774 | no |
| GGT1       | -0.027512631 | -0.726629358 | 0.467696993 | 0.565307455 | no |

|            |              |              |             |             |    |
|------------|--------------|--------------|-------------|-------------|----|
| SLC26A4    | 0.027501823  | 0.726343686  | 0.467871947 | 0.565485116 | no |
| MBD6       | 0.027497972  | 0.726241922  | 0.467934279 | 0.56551892  | no |
| GCNT4      | 0.027496639  | 0.726206694  | 0.467955858 | 0.56551892  | no |
| ZNF878     | 0.027493571  | 0.726125598  | 0.468005535 | 0.56554515  | no |
| SATB2      | -0.027485341 | -0.72590808  | 0.468138795 | 0.565672374 | no |
| REG1B      | 0.027478618  | 0.725730367  | 0.468247685 | 0.565770136 | no |
| CPB1       | -0.027461418 | -0.725275758 | 0.4685263   | 0.566072949 | no |
| LOC728613  | -0.027455679 | -0.725124077 | 0.468619281 | 0.566151456 | no |
| PLEKHM1P   | 0.02745131   | 0.725008619  | 0.468690064 | 0.566203138 | no |
| BNIP3L     | 0.027447461  | 0.724906865  | 0.46875245  | 0.56624467  | no |
| TFAMP1     | -0.027437614 | -0.724646615 | 0.468912033 | 0.566403602 | no |
| MRPL1      | -0.027420416 | -0.724192067 | 0.46919083  | 0.566685753 | no |
| OR1A1      | -0.027419012 | -0.724154951 | 0.4692136   | 0.566685753 | no |
| POTED      | -0.027418019 | -0.724128697 | 0.469229706 | 0.566685753 | no |
| ESRP1      | -0.027411823 | -0.723964942 | 0.469330172 | 0.56677323  | no |
| POLH       | 0.027399777  | 0.723646559  | 0.469525539 | 0.566975294 | no |
| OR1L8      | 0.027391843  | 0.723436871  | 0.469654233 | 0.567091406 | no |
| RPP38      | -0.027390391 | -0.723398489 | 0.469677792 | 0.567091406 | no |
| ZFY        | 0.02737276   | 0.72293248   | 0.469963878 | 0.567371622 | no |
| DUOXA1     | 0.027372629  | 0.722929027  | 0.469965998 | 0.567371622 | no |
| LOC728392  | 0.027364414  | 0.722711891  | 0.470099333 | 0.567498705 | no |
| C1orf125   | -0.027360986 | -0.722621308 | 0.470154963 | 0.567507105 | no |
| SEC14L2    | 0.027360526  | 0.722609149  | 0.47016243  | 0.567507105 | no |
| SCNN1A     | 0.027341772  | 0.722113467  | 0.47046691  | 0.567840725 | no |
| XAGE1D     | 0.027337467  | 0.721999671  | 0.470536826 | 0.56789121  | no |
| OR9G9      | 0.027324978  | 0.721669589  | 0.470739661 | 0.568102099 | no |
| IHH        | 0.027312742  | 0.721346196  | 0.470938432 | 0.568308059 | no |
| CRIM1      | 0.027309288  | 0.721254891  | 0.470994561 | 0.568318301 | no |
| COL7A1     | 0.02730765   | 0.721211601  | 0.471021174 | 0.568318301 | no |
| SVIP       | 0.02730703   | 0.721195215  | 0.471031248 | 0.568318301 | no |
| MIER2      | -0.027293399 | -0.720834938 | 0.471252768 | 0.568541891 | no |
| NUP35      | -0.027292166 | -0.720802358 | 0.471272804 | 0.568541891 | no |
| NUP153     | 0.027283839  | 0.720582266  | 0.471408161 | 0.568671254 | no |
| BAMBI      | 0.027268986  | 0.720189708  | 0.47164964  | 0.568928117 | no |
| COX7A1     | 0.027267281  | 0.720144634  | 0.471677371 | 0.568928117 | no |
| CHRN3      | -0.027259271 | -0.719932944 | 0.471807623 | 0.569051275 | no |
| TUBA3E     | -0.027252542 | -0.719755078 | 0.471917078 | 0.569149337 | no |
| CPSF2      | -0.027250536 | -0.719702072 | 0.4719497   | 0.569154729 | no |
| FGFBP1     | -0.027233147 | -0.719242481 | 0.4722326   | 0.569461929 | no |
| IL33       | 0.027226024  | 0.719054199  | 0.472348523 | 0.569567748 | no |
| C1orf52    | -0.027212666 | -0.718701157 | 0.47256593  | 0.569795919 | no |
| ST6GALNAC5 | -0.027206402 | -0.718535594 | 0.472667904 | 0.569884887 | no |
| FAM108C1   | -0.027199134 | -0.718343494 | 0.472786238 | 0.569993569 | no |
| SCGB1A1    | -0.027191063 | -0.718130194 | 0.472917651 | 0.570118005 | no |
| ANKIB1     | 0.027179778  | 0.717831917  | 0.473101451 | 0.570305577 | no |
| ZNF703     | 0.027151389  | 0.717081602  | 0.473563974 | 0.570829096 | no |
| TREX1      | 0.027142838  | 0.716855613  | 0.473703331 | 0.570935664 | no |
| OR6Q1      | 0.027142499  | 0.716846646  | 0.473708861 | 0.570935664 | no |
| SIRPA      | -0.027135662 | -0.716665938 | 0.473820313 | 0.571035949 | no |
| OR2A12     | 0.027132928  | 0.716593685  | 0.473864879 | 0.571055619 | no |
| DSC3       | 0.027126687  | 0.716428736  | 0.473966629 | 0.571137394 | no |

|              |              |              |             |             |    |
|--------------|--------------|--------------|-------------|-------------|----|
| C2orf27B     | -0.027125301 | -0.716392093 | 0.473989234 | 0.571137394 | no |
| PCDHGC5      | -0.027119454 | -0.716237559 | 0.474084573 | 0.571180162 | no |
| OBSCN        | -0.02711835  | -0.716208394 | 0.474102567 | 0.571180162 | no |
| PDK4         | 0.027117926  | 0.716197189  | 0.474109481 | 0.571180162 | no |
| COPS7B       | -0.027110117 | -0.71599078  | 0.474236843 | 0.571299559 | no |
| PRR4         | 0.027098653  | 0.715687792  | 0.474423834 | 0.571490769 | no |
| GFRAL        | -0.027090504 | -0.715472427 | 0.474556772 | 0.571616849 | no |
| PSMC1        | 0.027083092  | 0.71527651   | 0.474677723 | 0.571728477 | no |
| TMEM14A      | -0.027071932 | -0.714981552 | 0.47485985  | 0.57191377  | no |
| TAS2R16      | -0.027052833 | -0.714476776 | 0.475171623 | 0.572255174 | no |
| RBM41        | 0.027049803  | 0.714396687  | 0.4752211   | 0.572280671 | no |
| SHOX         | 0.027040883  | 0.714160953  | 0.475366747 | 0.57242197  | no |
| MOV10L1      | -0.027024863 | -0.713737534 | 0.475628415 | 0.572702954 | no |
| SNORD17      | 0.027019814  | 0.713604088  | 0.475710899 | 0.572768161 | no |
| RHEB         | -0.027004016 | -0.713186565 | 0.475969026 | 0.573029666 | no |
| SLC04A1      | -0.027003052 | -0.713161093 | 0.475984776 | 0.573029666 | no |
| C9orf79      | 0.026994099  | 0.712924462  | 0.476131106 | 0.573171701 | no |
| OGT          | -0.026983715 | -0.712650017 | 0.476300851 | 0.573341903 | no |
| C9orf93      | -0.026932226 | -0.711289184 | 0.47714302  | 0.574288264 | no |
| THOC4        | -0.026932176 | -0.711287852 | 0.477143845 | 0.574288264 | no |
| ZNF556       | -0.026929137 | -0.711207553 | 0.477193565 | 0.574313917 | no |
| CNBP         | -0.026923372 | -0.711055187 | 0.477287914 | 0.57436795  | no |
| GOLGA3       | -0.026922923 | -0.711043297 | 0.477295277 | 0.57436795  | no |
| DNMT3L       | 0.026905441  | 0.710581263  | 0.477581449 | 0.574678117 | no |
| TPCN2        | -0.026894064 | -0.710280592 | 0.477767727 | 0.574868053 | no |
| C3orf30      | -0.026863684 | -0.709477649 | 0.478265378 | 0.575426858 | no |
| BMX          | 0.026862238  | 0.709439439  | 0.478289066 | 0.575426858 | no |
| CCDC38       | -0.026840377 | -0.708861672 | 0.478647343 | 0.575823633 | no |
| LOC389634    | 0.02683503   | 0.708720357  | 0.478734995 | 0.575894813 | no |
| LSR          | -0.026831348 | -0.708623045 | 0.478795359 | 0.575933161 | no |
| KCTD21       | -0.026819677 | -0.708314585 | 0.47898673  | 0.57612908  | no |
| SNORA59B     | 0.026814669  | 0.708182211  | 0.479068868 | 0.576168804 | no |
| NRK          | 0.026814188  | 0.708169505  | 0.479076752 | 0.576168804 | no |
| EXPH5        | -0.026807574 | -0.707994702 | 0.47918523  | 0.576264988 | no |
| SLC26A5      | 0.026798418  | 0.707752713  | 0.479335424 | 0.576411325 | no |
| HIST1H2AJ    | 0.026784909  | 0.707395675  | 0.479557073 | 0.576643565 | no |
| FEN1         | -0.026768594 | -0.706964487 | 0.479824829 | 0.576931215 | no |
| MAP9         | -0.02676491  | -0.706867127 | 0.479885297 | 0.576940169 | no |
| OR52N1       | 0.026764663  | 0.706860606  | 0.479889348 | 0.576940169 | no |
| MDH1         | -0.02676048  | -0.706750061 | 0.479958011 | 0.576988409 | no |
| GOLGB1       | -0.026756897 | -0.706655363 | 0.480016836 | 0.577024816 | no |
| LOC100216545 | -0.026751916 | -0.706523708 | 0.480098624 | 0.577088821 | no |
| OSGEP        | 0.026741723  | 0.706254309  | 0.480266006 | 0.577255699 | no |
| ITFG1        | 0.026738332  | 0.706164691  | 0.480321695 | 0.577288314 | no |
| SNORA84      | 0.02673151   | 0.705984402  | 0.480433737 | 0.577388652 | no |
| DKC1         | 0.026697343  | 0.705081397  | 0.48099513  | 0.578028978 | no |
| PINX1        | 0.02668103   | 0.704650257  | 0.481263293 | 0.578316866 | no |
| MBP          | -0.026648897 | -0.703801033 | 0.481791738 | 0.578917471 | no |
| KAL1         | -0.026641061 | -0.703593933 | 0.481920658 | 0.579037967 | no |
| MYO18B       | -0.026637744 | -0.703506248 | 0.481975248 | 0.579069144 | no |
| CD24         | -0.026618497 | -0.702997583 | 0.482291991 | 0.579415263 | no |

|           |              |              |             |             |    |
|-----------|--------------|--------------|-------------|-------------|----|
| CTDSPL    | 0.026615202  | 0.702910511  | 0.482346221 | 0.579445983 | no |
| DNAJB14   | 0.026611533  | 0.70281354   | 0.482406621 | 0.57948411  | no |
| ZNF434    | -0.026608288 | -0.702727768 | 0.482460049 | 0.579513859 | no |
| ARL6IP4   | 0.026600091  | 0.70251114   | 0.482595002 | 0.579641523 | no |
| SLC22A5   | -0.026592877 | -0.70232048  | 0.482713795 | 0.579749763 | no |
| HIST1H4D  | 0.026587326  | 0.702173768  | 0.482805216 | 0.579825118 | no |
| TEX12     | 0.026585524  | 0.70212614   | 0.482834897 | 0.579826321 | no |
| BCL2L15   | -0.026576509 | -0.701887896 | 0.482983381 | 0.579970184 | no |
| PPWD1     | 0.026558439  | 0.701410335  | 0.48328109  | 0.580293211 | no |
| SNORA2A   | 0.02655553   | 0.701333434  | 0.48332904  | 0.58031632  | no |
| AKR1C2    | 0.026545888  | 0.701078617  | 0.483487941 | 0.580472636 | no |
| COQ5      | 0.026539887  | 0.700920006  | 0.483586864 | 0.580556927 | no |
| APOA2     | -0.026529911 | -0.700656375 | 0.48375131  | 0.580713515 | no |
| HIST1H3J  | 0.02652849   | 0.700618814  | 0.483774742 | 0.580713515 | no |
| LOC646851 | -0.026514004 | -0.700235953 | 0.484013621 | 0.580965767 | no |
| NIPAL4    | 0.026500767  | 0.699886126  | 0.484231945 | 0.581160653 | no |
| ATP2A1    | -0.026500674 | -0.699883677 | 0.484233473 | 0.581160653 | no |
| TAC01     | 0.026484913  | 0.699467128  | 0.484493509 | 0.581438224 | no |
| CAPN11    | 0.026480024  | 0.699337925  | 0.48457418  | 0.581500521 | no |
| HSFY2     | -0.026473337 | -0.699161182 | 0.484684547 | 0.581598443 | no |
| SCARNA3   | 0.026462849  | 0.698884011  | 0.484857653 | 0.581771634 | no |
| LTK       | 0.026458086  | 0.698758136  | 0.484936278 | 0.581831445 | no |
| LELP1     | -0.026452976 | -0.698623089 | 0.485020641 | 0.581898132 | no |
| C14orf184 | 0.026447478  | 0.698477769  | 0.48511143  | 0.58197252  | no |
| GPC5      | 0.026436824  | 0.69819621   | 0.485287361 | 0.582149036 | no |
| PCTP      | 0.026421033  | 0.697778878  | 0.485548192 | 0.582427372 | no |
| GCG       | 0.02641723   | 0.697678379  | 0.485611015 | 0.582436163 | no |
| TRIM54    | -0.026416177 | -0.697650538 | 0.48562842  | 0.582436163 | no |
| RPS15A    | 0.026415358  | 0.697628903  | 0.485641945 | 0.582436163 | no |
| C17orf75  | -0.026407217 | -0.697413733 | 0.485776469 | 0.582562943 | no |
| C2orf71   | -0.026402753 | -0.697295761 | 0.485850234 | 0.58261517  | no |
| NODAL     | 0.026401094  | 0.697251913  | 0.485877652 | 0.58261517  | no |
| RRP1B     | 0.026392249  | 0.69701816   | 0.486023834 | 0.582755894 | no |
| OR6C1     | -0.026378083 | -0.696643793 | 0.486258002 | 0.583002092 | no |
| GSTCD     | 0.026332054  | 0.695427311  | 0.487019336 | 0.583880273 | no |
| DEFB4A    | 0.026328874  | 0.695343281  | 0.48707195  | 0.583908727 | no |
| LOC729799 | 0.026320717  | 0.695127683  | 0.487206957 | 0.584003476 | no |
| OR4X1     | -0.026320608 | -0.69512481  | 0.487208756 | 0.584003476 | no |
| FJX1      | 0.026308113  | 0.694794583  | 0.487415583 | 0.584216757 | no |
| KRTAP26-1 | -0.026296719 | -0.694493481 | 0.48760421  | 0.584408199 | no |
| SEC22C    | 0.026290149  | 0.694319849  | 0.487713    | 0.58447396  | no |
| INPPL1    | 0.026289914  | 0.694313635  | 0.487716895 | 0.58447396  | no |
| PHGR1     | 0.026286721  | 0.694229243  | 0.487769776 | 0.584502687 | no |
| COX5B     | 0.026278742  | 0.694018385  | 0.487901917 | 0.584626382 | no |
| IL17RB    | 0.026273443  | 0.69387834   | 0.487989691 | 0.584694673 | no |
| KCNA5     | -0.02627181  | -0.693835173 | 0.488016748 | 0.584694673 | no |
| OR2T5     | -0.026267859 | -0.69373076  | 0.488082197 | 0.584738437 | no |
| PCDHB12   | -0.026255089 | -0.693393274 | 0.488293777 | 0.58492527  | no |
| CCDC64B   | -0.026254954 | -0.693389713 | 0.488296009 | 0.58492527  | no |
| C1orf146  | -0.026243546 | -0.693088213 | 0.48848507  | 0.585117077 | no |
| KRTAP10-2 | -0.026239144 | -0.692971865 | 0.488558038 | 0.585169811 | no |

|              |              |              |             |             |    |
|--------------|--------------|--------------|-------------|-------------|----|
| ETV4         | 0.026231981  | 0.69278257   | 0.488676769 | 0.58527601  | no |
| TSG1         | 0.026230302  | 0.692738201  | 0.4887046   | 0.58527601  | no |
| MLH3         | 0.026225225  | 0.69260403   | 0.488788767 | 0.585335682 | no |
| RUVBL2       | -0.026223804 | -0.692566475 | 0.488812328 | 0.585335682 | no |
| MBNL2        | 0.026214104  | 0.692310125  | 0.488973166 | 0.58548533  | no |
| DTX3         | -0.026212775 | -0.692274983 | 0.488995216 | 0.58548533  | no |
| ZBED4        | -0.026209169 | -0.692179698 | 0.489055008 | 0.585522245 | no |
| RGS6         | -0.026195639 | -0.691822111 | 0.489279432 | 0.58575625  | no |
| DLST         | 0.026181638  | 0.691452112  | 0.489511704 | 0.585999623 | no |
| TRPV5        | 0.026178635  | 0.69137275   | 0.489561532 | 0.586024574 | no |
| CNGA2        | 0.026165145  | 0.691016243  | 0.489785403 | 0.586254846 | no |
| AK1          | 0.026163549  | 0.690974063  | 0.489811893 | 0.586254846 | no |
| MBD3L1       | 0.026161529  | 0.690920678  | 0.489845422 | 0.586260271 | no |
| LOC100190986 | -0.026158149 | -0.690831333 | 0.48990154  | 0.586292727 | no |
| ORC6L        | 0.026156061  | 0.690776163  | 0.489936194 | 0.586299495 | no |
| MAD2L1BP     | -0.026151252 | -0.690649066 | 0.490016031 | 0.586360329 | no |
| CPAMD8       | -0.026147787 | -0.690557488 | 0.490073562 | 0.586394465 | no |
| RNH1         | 0.026138885  | 0.690322229  | 0.490221371 | 0.586536612 | no |
| EPB42        | 0.026126118  | 0.689984823  | 0.4904334   | 0.586755576 | no |
| RNF43        | 0.026121928  | 0.689874094  | 0.490502993 | 0.586804113 | no |
| SLC18A1      | 0.02611824   | 0.689776621  | 0.49056426  | 0.586817179 | no |
| ASPA         | -0.026117776 | -0.689764365 | 0.490571964 | 0.586817179 | no |
| SNORA12      | 0.026100691  | 0.689312857  | 0.490855816 | 0.587121983 | no |
| CHRFAM7A     | -0.026081916 | -0.68881668  | 0.491167851 | 0.58746046  | no |
| SPRYD5       | -0.026065082 | -0.688371778 | 0.491447732 | 0.58776044  | no |
| MYL10        | 0.026059115  | 0.688214091  | 0.491546951 | 0.587844331 | no |
| ACSS2        | 0.026052526  | 0.688039964  | 0.491656526 | 0.587940596 | no |
| PCNX         | -0.026040013 | -0.687709261 | 0.49186467  | 0.588154714 | no |
| PPAPDC2      | -0.026036048 | -0.687604478 | 0.49193063  | 0.588198798 | no |
| C1orf55      | -0.026003153 | -0.686735162 | 0.492478039 | 0.588818509 | no |
| PBXIP1       | 0.025999496  | 0.686638501  | 0.492538927 | 0.588856485 | no |
| TMEM167A     | -0.025981128 | -0.686153084 | 0.492844757 | 0.589175191 | no |
| CDHR5        | -0.025979985 | -0.686122888 | 0.492863785 | 0.589175191 | no |
| HIST1H2AD    | 0.025970187  | 0.685863939  | 0.493026977 | 0.589335428 | no |
| ARFGEF1      | 0.025957977  | 0.685541254  | 0.493230377 | 0.589543704 | no |
| AGXT2        | -0.025934127 | -0.68491097  | 0.493627798 | 0.58998385  | no |
| UBE2NL       | -0.025929157 | -0.684779633 | 0.493710633 | 0.590047974 | no |
| METAP2       | -0.025923307 | -0.684625014 | 0.493808162 | 0.59012965  | no |
| C22orf31     | -0.025919676 | -0.684529056 | 0.493868694 | 0.590167106 | no |
| SMPD4        | -0.025914196 | -0.68438423  | 0.493960061 | 0.590235006 | no |
| DPRX         | -0.025911509 | -0.684313241 | 0.49400485  | 0.590235006 | no |
| TTYT23       | -0.025911015 | -0.684300172 | 0.494013096 | 0.590235006 | no |
| AMT          | -0.025900877 | -0.684032265 | 0.494182145 | 0.590386673 | no |
| LDLR         | 0.025898418  | 0.683967265  | 0.494223165 | 0.590386673 | no |
| SIX2         | 0.025898149  | 0.683960173  | 0.49422764  | 0.590386673 | no |
| LSM7         | -0.025895494 | -0.683889998 | 0.494271928 | 0.590404693 | no |
| CDC16        | 0.025874988  | 0.68334807   | 0.494614013 | 0.590778408 | no |
| PTRH2        | 0.025844355  | 0.682538538  | 0.495125256 | 0.591354113 | no |
| C10orf119    | 0.025833625  | 0.682254962  | 0.495304409 | 0.59152106  | no |
| OR51G1       | -0.025832478 | -0.682224666 | 0.495323551 | 0.59152106  | no |
| MFSD2B       | -0.025819808 | -0.681889821 | 0.495535143 | 0.591738794 | no |

|            |              |              |             |             |    |
|------------|--------------|--------------|-------------|-------------|----|
| BASE       | -0.025815965 | -0.681788263 | 0.495599328 | 0.591780488 | no |
| ABCG2      | -0.025813679 | -0.68172786  | 0.495637505 | 0.591791122 | no |
| TEX9       | 0.025811248  | 0.681663611  | 0.495678115 | 0.59180466  | no |
| PANK3      | -0.025780664 | -0.680855356 | 0.496189138 | 0.592379805 | no |
| DSCR9      | -0.025776358 | -0.680741575 | 0.496261099 | 0.592410195 | no |
| HIST1H3C   | 0.025774527  | 0.680693169  | 0.496291715 | 0.592410195 | no |
| CXorf49B   | -0.025773136 | -0.680656414 | 0.496314963 | 0.592410195 | no |
| C2orf55    | -0.025772129 | -0.680629798 | 0.496331798 | 0.592410195 | no |
| ENPP3      | -0.025761824 | -0.680357465 | 0.496504072 | 0.592580834 | no |
| LOC285370  | -0.025741142 | -0.679810908 | 0.496849912 | 0.592958593 | no |
| EIF2AK1    | -0.025737987 | -0.67972753  | 0.496902682 | 0.592986567 | no |
| PGK2       | 0.025733694  | 0.679614092  | 0.496974481 | 0.593037245 | no |
| PSMC3IP    | 0.025728132  | 0.679467087  | 0.497067535 | 0.593080882 | no |
| RUNDC2C    | 0.025726787  | 0.679431547  | 0.497090032 | 0.593080882 | no |
| ITFG2      | -0.025726248 | -0.6794173   | 0.497099051 | 0.593080882 | no |
| BTNL2      | -0.025715446 | -0.679131832 | 0.497279784 | 0.593261502 | no |
| HSPB8      | -0.025695712 | -0.678610336 | 0.497610039 | 0.593620472 | no |
| PSMB6      | -0.02569088  | -0.678482628 | 0.497690932 | 0.593681944 | no |
| CNGA1      | -0.025676348 | -0.6780986   | 0.497934226 | 0.59393712  | no |
| NPFF       | -0.025673143 | -0.678013907 | 0.497987891 | 0.593966089 | no |
| KRT4       | -0.025670009 | -0.677931077 | 0.498040377 | 0.593993037 | no |
| CTXN1      | -0.025667913 | -0.677875681 | 0.498075482 | 0.593993037 | no |
| CAPN7      | -0.025666531 | -0.677839166 | 0.498098622 | 0.593993037 | no |
| SLC46A1    | 0.025664517  | 0.677785948  | 0.498132348 | 0.593993228 | no |
| FAM101A    | -0.025663013 | -0.677746197 | 0.498157541 | 0.593993228 | no |
| PM20D1     | 0.025655384  | 0.677544581  | 0.498285327 | 0.594110559 | no |
| CRNN       | -0.025639619 | -0.677127979 | 0.498549429 | 0.594390397 | no |
| SHISA3     | 0.025589134  | 0.675793827  | 0.499395708 | 0.595364256 | no |
| CCDC130    | -0.025579585 | -0.675541469 | 0.499555869 | 0.595520081 | no |
| SFRS4      | 0.025572213  | 0.675346647  | 0.499679534 | 0.595629336 | no |
| NAPSA      | -0.025569857 | -0.67528439  | 0.499719055 | 0.595629336 | no |
| OR5AP2     | -0.025568853 | -0.675257855 | 0.4997359   | 0.595629336 | no |
| HIST1H3B   | 0.025560203  | 0.675029269  | 0.499881026 | 0.595767188 | no |
| LCE2C      | -0.025555609 | -0.674907849 | 0.499958123 | 0.595823951 | no |
| NCRNA00095 | -0.02555205  | -0.674813798 | 0.500017846 | 0.595860003 | no |
| RETNLB     | -0.025533324 | -0.674318937 | 0.500332148 | 0.596199409 | no |
| OR6B3      | -0.025527951 | -0.674176956 | 0.500422344 | 0.596271744 | no |
| STAB2      | -0.025526159 | -0.674129587 | 0.500452438 | 0.596272461 | no |
| CD207      | 0.025514694  | 0.673826609  | 0.500644945 | 0.596466677 | no |
| SLC28A3    | 0.025488779  | 0.673141783  | 0.501080218 | 0.596950083 | no |
| C10orf90   | 0.02548461   | 0.673031592  | 0.501150274 | 0.596998364 | no |
| SPZ1       | -0.025480818 | -0.672931402 | 0.501213976 | 0.597039072 | no |
| SPAG11A    | 0.025449183  | 0.672095393  | 0.501745687 | 0.597637228 | no |
| STK33      | 0.025423702  | 0.671422011  | 0.502174184 | 0.59811238  | no |
| NPSR1      | 0.025406174  | 0.670958807  | 0.502469049 | 0.598428324 | no |
| DEFB104A   | -0.02538833  | -0.670487264 | 0.502769317 | 0.598750666 | no |
| BSPH1      | -0.025381884 | -0.670316934 | 0.502877803 | 0.598844588 | no |
| COX6A1     | -0.025374885 | -0.670131956 | 0.502995632 | 0.598909919 | no |
| HDAC10     | 0.025373867  | 0.670105051  | 0.503012771 | 0.598909919 | no |
| POM121L2   | 0.025373346  | 0.6700913    | 0.503021532 | 0.598909919 | no |
| UCP3       | -0.025370158 | -0.670007048 | 0.503075206 | 0.598938553 | no |

|              |              |              |             |             |    |
|--------------|--------------|--------------|-------------|-------------|----|
| CSGALNACT1   | 0.02536753   | 0.669937588  | 0.503119459 | 0.598955969 | no |
| CEP164       | -0.02533535  | -0.669087199 | 0.503661407 | 0.599565846 | no |
| OR2AK2       | -0.02532116  | -0.668712222 | 0.503900476 | 0.599815121 | no |
| RSBN1L       | -0.025311683 | -0.668461769 | 0.504060188 | 0.599969909 | no |
| TDRG1        | 0.02530743   | 0.668349387  | 0.504131861 | 0.600019895 | no |
| TBCE         | 0.025301025  | 0.668180125  | 0.504239821 | 0.600113062 | no |
| SCN4A        | 0.025295368  | 0.66803064   | 0.504335176 | 0.600191218 | no |
| NFKBIL2      | -0.025287255 | -0.66781624  | 0.504471958 | 0.600301717 | no |
| C15orf23     | 0.025286339  | 0.667792021  | 0.504487411 | 0.600301717 | no |
| FRMD1        | -0.025266546 | -0.667268991 | 0.504821177 | 0.600663522 | no |
| ABCD3        | 0.025262712  | 0.667167671  | 0.504885847 | 0.600705117 | no |
| CDH16        | -0.025250263 | -0.666838682 | 0.505095862 | 0.600919627 | no |
| AP1M1        | 0.02523973   | 0.666560346  | 0.505273578 | 0.601095687 | no |
| OR2T12       | -0.025222918 | -0.666116066 | 0.505557317 | 0.601397849 | no |
| TEDDM1       | -0.025217805 | -0.665980951 | 0.505643625 | 0.601465129 | no |
| HOXD1        | -0.025206444 | -0.665680722 | 0.50583543  | 0.601657885 | no |
| MRPL23       | 0.025193246  | 0.665331958  | 0.506058291 | 0.601887554 | no |
| ICT1         | 0.025188261  | 0.665200232  | 0.506142478 | 0.601952272 | no |
| WDR64        | 0.025165982  | 0.664611494  | 0.506518834 | 0.602343766 | no |
| PRKAR1A      | 0.025165248  | 0.664592083  | 0.506531245 | 0.602343766 | no |
| ZNF329       | -0.02516267  | -0.664523952 | 0.506574808 | 0.602360141 | no |
| RGS8         | -0.025142749 | -0.663997522 | 0.506911477 | 0.60272502  | no |
| WDR26        | -0.02513453  | -0.663780345 | 0.507050403 | 0.602837567 | no |
| HSPA1B       | 0.025133622  | 0.663756331  | 0.507065766 | 0.602837567 | no |
| WNT6         | 0.025118677  | 0.663361411  | 0.507318448 | 0.603102509 | no |
| C10orf71     | 0.025114535  | 0.663251942  | 0.507388501 | 0.603150324 | no |
| THOC6        | 0.02510361   | 0.662963256  | 0.507573267 | 0.603334488 | no |
| FAM135A      | 0.025095199  | 0.66274098   | 0.507715552 | 0.603468139 | no |
| MYBL1        | 0.02508623   | 0.66250397   | 0.507867293 | 0.603613012 | no |
| GAGE12D      | 0.025081434  | 0.662377231  | 0.507948445 | 0.603640503 | no |
| PRR5-ARHGAP8 | 0.025081334  | 0.662374588  | 0.507950137 | 0.603640503 | no |
| TSPY3        | 0.025075311  | 0.66221544   | 0.508052051 | 0.603723466 | no |
| MMP26        | -0.025073679 | -0.662172312 | 0.50807967  | 0.603723466 | no |
| CDY2B        | -0.02504173  | -0.661328044 | 0.508620507 | 0.604330596 | no |
| TMEM85       | 0.025014308  | 0.660603383  | 0.509084965 | 0.604846907 | no |
| HEATR7A      | -0.025010854 | -0.660512114 | 0.509143478 | 0.604880882 | no |
| SH2D6        | -0.025006681 | -0.660401844 | 0.509214177 | 0.604929328 | no |
| STC2         | -0.024999425 | -0.660210108 | 0.509337121 | 0.60503983  | no |
| TRIM27       | -0.024981945 | -0.659748187 | 0.509633373 | 0.60535618  | no |
| KIAA0408     | 0.024970242  | 0.659438916  | 0.509831775 | 0.60552572  | no |
| C3P1         | -0.024969992 | -0.659432325 | 0.509836004 | 0.60552572  | no |
| PSG4         | 0.024955692  | 0.659054436  | 0.51007848  | 0.60577812  | no |
| ELOF1        | -0.024945097 | -0.658774457 | 0.510258171 | 0.605930521 | no |
| PTPRB        | 0.024943236  | 0.658725281  | 0.510289735 | 0.605930521 | no |
| MAGEA10      | 0.024942825  | 0.658714408  | 0.510296715 | 0.605930521 | no |
| TSHB         | 0.024929516  | 0.658362725  | 0.510522481 | 0.606133732 | no |
| C21orf84     | 0.024929202  | 0.65835442   | 0.510527813 | 0.606133732 | no |
| SESN1        | 0.024914839  | 0.657974864  | 0.510771532 | 0.606387483 | no |
| NCRNA00162   | 0.024908302  | 0.65780213   | 0.510882468 | 0.606449658 | no |
| XAGE5        | -0.024908218 | -0.65779991  | 0.510883894 | 0.606449658 | no |
| TMOD1        | 0.024905095  | 0.657717391  | 0.510936896 | 0.606473443 | no |

|           |              |              |             |             |    |
|-----------|--------------|--------------|-------------|-------------|----|
| IMPAD1    | -0.024903503 | -0.65767531  | 0.510963925 | 0.606473443 | no |
| BMI1      | -0.024888283 | -0.657273128 | 0.51122229  | 0.606744482 | no |
| DNAJA3    | -0.024883872 | -0.657156568 | 0.511297182 | 0.606797747 | no |
| PRO0628   | 0.024872156  | 0.656846967  | 0.511496135 | 0.606998231 | no |
| OR5D16    | -0.024868071 | -0.656739028 | 0.511565507 | 0.607041458 | no |
| MED6      | -0.024866476 | -0.656696858 | 0.51159261  | 0.607041458 | no |
| GSTZ1     | -0.024861112 | -0.656555131 | 0.511683709 | 0.607113921 | no |
| USMG5     | -0.024857757 | -0.656466454 | 0.511740712 | 0.607145925 | no |
| FTMT      | -0.024855946 | -0.656418611 | 0.511771467 | 0.607146786 | no |
| LOC339240 | 0.02485093   | 0.656286055  | 0.511856685 | 0.607172004 | no |
| NT5C      | -0.02484962  | -0.656251434 | 0.511878943 | 0.607172004 | no |
| PISRT1    | -0.024849392 | -0.656245408 | 0.511882818 | 0.607172004 | no |
| PPP1R1B   | -0.024844307 | -0.65611104  | 0.511969211 | 0.607218531 | no |
| LOH12CR2  | -0.024843548 | -0.656090979 | 0.51198211  | 0.607218531 | no |
| DDX21     | 0.024830342  | 0.655742007  | 0.512206522 | 0.607449054 | no |
| FUZ       | -0.024778078 | -0.654360946 | 0.513095142 | 0.608467217 | no |
| KRT19     | -0.024765748 | -0.654035121 | 0.513304906 | 0.608635186 | no |
| NCCRP1    | 0.024763956  | 0.653987752  | 0.513335405 | 0.608635186 | no |
| FLJ39739  | -0.02476363  | -0.653979154 | 0.513340942 | 0.608635186 | no |
| TFR2      | 0.024762675  | 0.653953907  | 0.513357198 | 0.608635186 | no |
| SNORD15B  | 0.024750438  | 0.653630556  | 0.513565424 | 0.608846355 | no |
| PLGLA     | -0.024747733 | -0.653559065 | 0.513611467 | 0.608865238 | no |
| PAN3      | -0.024735741 | -0.653242175 | 0.513815585 | 0.609047017 | no |
| CXXC5     | 0.024735185  | 0.653227475  | 0.513825055 | 0.609047017 | no |
| UBQLN3    | 0.024719439  | 0.652811385  | 0.514093137 | 0.609329057 | no |
| CMIP      | -0.024706278 | -0.652463621 | 0.514317253 | 0.609558956 | no |
| EGFR      | 0.024671568  | 0.651546406  | 0.514908597 | 0.610224033 | no |
| IMP3      | -0.024669501 | -0.651491801 | 0.514943813 | 0.610229998 | no |
| OR8G5     | -0.02465088  | -0.650999726 | 0.515261218 | 0.61057035  | no |
| OR5M8     | -0.024629905 | -0.650445476 | 0.515618851 | 0.610930396 | no |
| THAP4     | 0.024629516  | 0.65043518   | 0.515625496 | 0.610930396 | no |
| MACF1     | -0.024621727 | -0.650229364 | 0.515758333 | 0.611024398 | no |
| S100A14   | 0.02462132   | 0.650218606  | 0.515765277 | 0.611024398 | no |
| DGCR6L    | -0.024613179 | -0.650003495 | 0.515904134 | 0.61115309  | no |
| FAHD1     | -0.024584341 | -0.649241445 | 0.516396203 | 0.611687182 | no |
| GTF2A1L   | 0.02458321   | 0.649211573  | 0.516415497 | 0.611687182 | no |
| SLC18A2   | 0.024574208  | 0.64897368   | 0.516569162 | 0.611833351 | no |
| NLRP11    | -0.024544501 | -0.648188704 | 0.517076377 | 0.612364487 | no |
| IL25      | -0.024544396 | -0.648185923 | 0.517078174 | 0.612364487 | no |
| GL01      | 0.024538802  | 0.6480381    | 0.51717372  | 0.612441766 | no |
| ZFYVE19   | 0.024524921  | 0.647671293  | 0.517410846 | 0.612686686 | no |
| FER1L6    | 0.024515413  | 0.647420052  | 0.517573295 | 0.612843155 | no |
| SPNS1     | -0.024503902 | -0.647115888 | 0.517769999 | 0.613040164 | no |
| CREB1     | 0.024466351  | 0.646123611  | 0.518411979 | 0.613764325 | no |
| GMPR2     | -0.024454487 | -0.645810112 | 0.518614891 | 0.613949651 | no |
| WDR35     | -0.024453648 | -0.645787936 | 0.518629246 | 0.613949651 | no |
| AGT       | -0.024429406 | -0.645147367 | 0.519043988 | 0.614404646 | no |
| HSD17B4   | -0.024420995 | -0.644925106 | 0.519187932 | 0.614539056 | no |
| SYT8      | -0.024415095 | -0.644769207 | 0.519288911 | 0.614622597 | no |
| BANF1     | -0.024405753 | -0.644522336 | 0.519448834 | 0.61477589  | no |
| ATP2B4    | 0.024397402  | 0.644301691  | 0.519591791 | 0.614909086 | no |



|              |              |              |             |             |    |
|--------------|--------------|--------------|-------------|-------------|----|
| SNORA49      | 0.024391711  | 0.644151296  | 0.519689243 | 0.614988418 | no |
| HIST3H3      | -0.024387443 | -0.644038513 | 0.51976233  | 0.615038908 | no |
| KRTAP3-2     | -0.024381789 | -0.643889122 | 0.519859148 | 0.615117473 | no |
| LCE2B        | -0.024375074 | -0.643711685 | 0.519974155 | 0.615217548 | no |
| PTH2         | -0.02437266  | -0.643647901 | 0.5200155   | 0.615230463 | no |
| OTOL1        | -0.024357643 | -0.643251062 | 0.520272771 | 0.615497541 | no |
| PCDHA10      | -0.024355929 | -0.643205782 | 0.520302131 | 0.615497541 | no |
| FAM124A      | -0.024352151 | -0.643105942 | 0.52036687  | 0.61553811  | no |
| MTNR1B       | 0.024339443  | 0.642770155  | 0.520584633 | 0.615759674 | no |
| HIST1H4E     | 0.024333698  | 0.642618335  | 0.520683106 | 0.615840121 | no |
| WNT11        | -0.024295605 | -0.641611766 | 0.521336227 | 0.616576533 | no |
| HOXB9        | 0.024282831  | 0.641274229  | 0.521555335 | 0.616793435 | no |
| RGS21        | -0.024281356 | -0.641235252 | 0.521580639 | 0.616793435 | no |
| DAG1         | 0.024277206  | 0.641125585  | 0.52165184  | 0.616841555 | no |
| PI4KB        | -0.024264793 | -0.640797603 | 0.521864812 | 0.6170573   | no |
| LOC100133669 | -0.02424429  | -0.640255815 | 0.522216714 | 0.617437283 | no |
| ZNF354B      | -0.02423594  | -0.640035164 | 0.522360066 | 0.617562807 | no |
| PILRB        | -0.024234547 | -0.639998373 | 0.522383971 | 0.617562807 | no |
| ZNF160       | -0.024224197 | -0.639724867 | 0.522561694 | 0.617720078 | no |
| IQCC         | 0.024221465  | 0.639652694  | 0.522608597 | 0.617720078 | no |
| RFC1         | -0.024221363 | -0.63964999  | 0.522610355 | 0.617720078 | no |
| FLJ13224     | 0.024218318  | 0.639569537  | 0.522662641 | 0.617720078 | no |
| ZFAND2B      | -0.024217903 | -0.639558571 | 0.522669768 | 0.617720078 | no |
| OR5H6        | -0.024212808 | -0.639423945 | 0.522757269 | 0.617787378 | no |
| AKIRIN2      | -0.024203058 | -0.63916631  | 0.52292474  | 0.617949172 | no |
| PPYR1        | -0.024197577 | -0.639021459 | 0.523018909 | 0.618006211 | no |
| IN080C       | -0.024196029 | -0.638980566 | 0.523045497 | 0.618006211 | no |
| DYRK1B       | -0.024194911 | -0.638951016 | 0.523064709 | 0.618006211 | no |
| RAB22A       | -0.024185436 | -0.638700652 | 0.523227503 | 0.618162429 | no |
| SLC24A2      | -0.024183343 | -0.63864536  | 0.523263459 | 0.618168786 | no |
| GPD1L        | -0.024177073 | -0.638479677 | 0.523371209 | 0.618259953 | no |
| LRIT1        | 0.024158232  | 0.63798183   | 0.523695046 | 0.618599781 | no |
| KIAA0754     | -0.024156776 | -0.63794336  | 0.523720074 | 0.618599781 | no |
| ZNF555       | -0.02414909  | -0.637740267 | 0.523852213 | 0.618719713 | no |
| RNPC3        | -0.024144579 | -0.637621057 | 0.523929784 | 0.61874757  | no |
| OR10H4       | -0.024143719 | -0.637598328 | 0.523944574 | 0.61874757  | no |
| STX17        | 0.024142379  | 0.637562929  | 0.52396761  | 0.61874757  | no |
| OR6K2        | 0.024108195  | 0.636659653  | 0.524555589 | 0.619405729 | no |
| ASB17        | 0.02407935   | 0.635897467  | 0.52505199  | 0.619955681 | no |
| TTLL5        | -0.024060224 | -0.635392082 | 0.525381273 | 0.620308256 | no |
| C11orf85     | 0.024057957  | 0.635332173  | 0.525420313 | 0.620318125 | no |
| TRIM55       | -0.024055763 | -0.63527421  | 0.525458087 | 0.620326498 | no |
| XIRP1        | 0.024049503  | 0.635108791  | 0.525565896 | 0.620417545 | no |
| DAZAP2       | -0.024045686 | -0.635007936 | 0.525631633 | 0.620458919 | no |
| NDUFS4       | -0.024031551 | -0.634634425 | 0.525875121 | 0.620710094 | no |
| TATDN2       | -0.024028031 | -0.634541426 | 0.525935755 | 0.620745423 | no |
| OR5V1        | 0.024024866  | 0.634457795  | 0.525990285 | 0.620773544 | no |
| KIAA0776     | -0.024012237 | -0.634124078 | 0.526207905 | 0.620994129 | no |
| OR10G3       | -0.024009807 | -0.634059879 | 0.526249775 | 0.621007293 | no |
| ENTPD2       | 0.02400307   | 0.63388185   | 0.526365893 | 0.621108067 | no |
| ZKSCAN5      | -0.023972711 | -0.633079661 | 0.526889276 | 0.621689372 | no |

|          |              |              |             |             |    |
|----------|--------------|--------------|-------------|-------------|----|
| PTTG2    | 0.023954782  | 0.632605926  | 0.527198487 | 0.622017917 | no |
| ADCYAP1  | -0.023948078 | -0.632428777 | 0.527314138 | 0.622118062 | no |
| GPR142   | 0.023943079  | 0.632296685  | 0.527400381 | 0.622176402 | no |
| SOX9     | -0.023941644 | -0.632258776 | 0.527425134 | 0.622176402 | no |
| COG6     | 0.023923063  | 0.631767786  | 0.527745776 | 0.622510961 | no |
| GHDC     | 0.02392164   | 0.631730204  | 0.527770323 | 0.622510961 | no |
| RPL39    | 0.023902246  | 0.631217743  | 0.5281051   | 0.622860147 | no |
| SLC7A13  | 0.023900921  | 0.631182726  | 0.52812798  | 0.622860147 | no |
| FLJ41941 | 0.023884632  | 0.630752307  | 0.528409251 | 0.623155521 | no |
| TRIM42   | -0.023875844 | -0.630520102 | 0.528561025 | 0.623298151 | no |
| VPS16    | -0.023862768 | -0.630174605 | 0.528786889 | 0.623528131 | no |
| OR2A25   | 0.023844915  | 0.62970286   | 0.529095367 | 0.623855493 | no |
| GALR2    | 0.0238379    | 0.629517502  | 0.529216599 | 0.623962048 | no |
| GDPD4    | 0.0238133    | 0.628867481  | 0.529641853 | 0.624427021 | no |
| OR2T1    | -0.023802008 | -0.628569114 | 0.529837107 | 0.624620795 | no |
| ZNF823   | 0.023799746  | 0.628509346  | 0.529876224 | 0.624630488 | no |
| IGF2     | 0.023796439  | 0.628421979  | 0.529933407 | 0.624636182 | no |
| IL31RA   | 0.023795894  | 0.628407561  | 0.529942845 | 0.624636182 | no |
| PAFAH1B2 | -0.023773278 | -0.62780998  | 0.530334058 | 0.625060859 | no |
| IRX6     | -0.023764044 | -0.627565997 | 0.530493826 | 0.625212718 | no |
| HOXA13   | -0.023760022 | -0.62745972  | 0.530563428 | 0.625258299 | no |
| DMKN     | 0.023754728  | 0.627319845  | 0.53065504  | 0.625329812 | no |
| GLG1     | 0.023752538  | 0.627261957  | 0.530692956 | 0.625338045 | no |
| MALAT1   | -0.023748889 | -0.627165544 | 0.530756109 | 0.625376014 | no |
| GNAT2    | 0.023741507  | 0.62697049   | 0.530883887 | 0.625490118 | no |
| OGFOD2   | 0.023730138  | 0.626670081  | 0.531080712 | 0.625685557 | no |
| PWP1     | 0.023718511  | 0.626362868  | 0.531282034 | 0.62588627  | no |
| RDH13    | 0.023709876  | 0.626134703  | 0.531431579 | 0.626025967 | no |
| ZNF880   | 0.023674477  | 0.625199351  | 0.532044857 | 0.626659805 | no |
| PFKFB1   | 0.02367352   | 0.62517407   | 0.532061438 | 0.626659805 | no |
| CNOT2    | 0.023673451  | 0.625172255  | 0.532062628 | 0.626659805 | no |
| C2orf48  | -0.023662502 | -0.624882932 | 0.532252403 | 0.626846804 | no |
| OR51F2   | -0.02365085  | -0.624575075 | 0.532454372 | 0.627048142 | no |
| FRMD5    | -0.023638115 | -0.62423856  | 0.532675187 | 0.627271649 | no |
| TNIP2    | 0.023584611  | 0.622824842  | 0.533603351 | 0.628299418 | no |
| CAPRIN1  | 0.023584221  | 0.622814544  | 0.533610115 | 0.628299418 | no |
| ZNF57    | -0.023575221 | -0.622576743 | 0.533766323 | 0.62842095  | no |
| PNPO     | 0.023574693  | 0.622562779  | 0.533775496 | 0.62842095  | no |
| INTS3    | -0.023571056 | -0.622466685 | 0.533838626 | 0.628458678 | no |
| SIX1     | -0.023560104 | -0.622177297 | 0.534028764 | 0.628645913 | no |
| ZNF181   | 0.023555756  | 0.622062423  | 0.53410425  | 0.628650451 | no |
| BAG4     | -0.023554751 | -0.622035866 | 0.534121702 | 0.628650451 | no |
| C11orf66 | 0.02355451   | 0.622029478  | 0.5341259   | 0.628650451 | no |
| C3orf79  | -0.023551096 | -0.621939293 | 0.534185167 | 0.628683608 | no |
| VGF      | -0.023544328 | -0.621760453 | 0.534302706 | 0.628785338 | no |
| OR6C74   | -0.023529755 | -0.621375384 | 0.534555829 | 0.629046607 | no |
| CRYBB2   | -0.023495665 | -0.620474638 | 0.535148166 | 0.629703485 | no |
| PARM1    | -0.023493552 | -0.620418823 | 0.535184881 | 0.629703485 | no |
| TMEM33   | 0.023491022  | 0.620351956  | 0.535228869 | 0.629703485 | no |
| OR10H1   | -0.023490461 | -0.620337134 | 0.535238619 | 0.629703485 | no |
| ST8SIA5  | 0.023473462  | 0.619887974  | 0.535534138 | 0.630014501 | no |

|           |              |              |             |             |    |
|-----------|--------------|--------------|-------------|-------------|----|
| TMEM125   | -0.02346734  | -0.619726232 | 0.535640576 | 0.630103052 | no |
| PMS2L3    | -0.023464848 | -0.619660375 | 0.535683916 | 0.630117374 | no |
| NDUF4F4   | -0.023455024 | -0.619400808 | 0.535854758 | 0.630281662 | no |
| NRAP      | 0.02344604   | 0.619163414  | 0.536011029 | 0.630416861 | no |
| SLC36A2   | 0.02344483   | 0.619131463  | 0.536032063 | 0.630416861 | no |
| HIST1H4C  | 0.02343931   | 0.618985587  | 0.536128103 | 0.630493136 | no |
| ZC3H7A    | -0.023430915 | -0.61876377  | 0.536274158 | 0.630628216 | no |
| RRH       | -0.023427103 | -0.618663066 | 0.536340473 | 0.630643117 | no |
| EPB41     | 0.023426601  | 0.618649793  | 0.536349213 | 0.630643117 | no |
| IFNA16    | -0.023420865 | -0.618498229 | 0.536449028 | 0.630723799 | no |
| FAM50A    | -0.023405848 | -0.618101444 | 0.536710382 | 0.630994389 | no |
| SLC27A4   | 0.02340345   | 0.618038092  | 0.536752117 | 0.631006762 | no |
| CCDC58    | -0.023399963 | -0.617945945 | 0.536812823 | 0.631041436 | no |
| SLC5A4    | 0.023392023  | 0.617736161  | 0.536951043 | 0.631135413 | no |
| PTPN21    | 0.023391784  | 0.617729851  | 0.536955201 | 0.631135413 | no |
| CLDN22    | -0.023382927 | -0.617495815 | 0.537109421 | 0.631279983 | no |
| TMEM55A   | 0.023380132  | 0.617421977  | 0.537158082 | 0.631300476 | no |
| NPY1R     | 0.023376748  | 0.617332564  | 0.53721701  | 0.631333033 | no |
| KRTAP4-12 | -0.023373432 | -0.617244928 | 0.53727477  | 0.631364214 | no |
| OR4F21    | 0.023368165  | 0.617105768  | 0.537366495 | 0.631435301 | no |
| EPHA4     | -0.023363265 | -0.616976307 | 0.537451835 | 0.631498878 | no |
| KIAA1530  | -0.0233515   | -0.616665448 | 0.537656778 | 0.631693689 | no |
| STARD3    | -0.02335016  | -0.616630045 | 0.537680122 | 0.631693689 | no |
| C8A       | -0.023344735 | -0.616486699 | 0.537774642 | 0.631768025 | no |
| C1orf26   | 0.023332043  | 0.616151358  | 0.537995795 | 0.631991109 | no |
| OR6N1     | -0.023329596 | -0.616086697 | 0.538038443 | 0.632004487 | no |
| GLTPD2    | -0.023326552 | -0.61600626  | 0.538091499 | 0.632030089 | no |
| MAGEB6    | -0.023308042 | -0.615517189 | 0.538414145 | 0.632372324 | no |
| FLT1      | -0.023263301 | -0.614335035 | 0.539194428 | 0.633251986 | no |
| FREM2     | 0.023251357  | 0.614019442  | 0.539402831 | 0.633435364 | no |
| REG3G     | 0.023250761  | 0.614003698  | 0.539413229 | 0.633435364 | no |
| EPOR      | 0.023236911  | 0.613637755  | 0.539654935 | 0.633682394 | no |
| TTY16     | 0.023233212  | 0.61354      | 0.539719511 | 0.633705713 | no |
| RPS11     | 0.023230934  | 0.613479807  | 0.539759276 | 0.633705713 | no |
| PCDHB6    | -0.023228128 | -0.613405668 | 0.539808257 | 0.633705713 | no |
| C1orf9    | 0.023226997  | 0.613375786  | 0.539827999 | 0.633705713 | no |
| MC4R      | 0.023226795  | 0.61337047   | 0.539831511 | 0.633705713 | no |
| UTS2R     | -0.023210097 | -0.612929271 | 0.540123043 | 0.634011129 | no |
| MAST2     | -0.023206738 | -0.612840512 | 0.540181702 | 0.634043173 | no |
| HMGCS2    | -0.02320359  | -0.612757323 | 0.540236683 | 0.634070896 | no |
| SPDYE4    | 0.023179641  | 0.612124539  | 0.540654991 | 0.634525025 | no |
| OR13C3    | -0.023176413 | -0.612039261 | 0.540711378 | 0.634554367 | no |
| TMEM161A  | 0.023161472  | 0.611644486  | 0.540972443 | 0.634823893 | no |
| RPLP1     | -0.023137021 | -0.610998456 | 0.541399801 | 0.635288519 | no |
| IGSF3     | -0.02312864  | -0.610776992 | 0.541546341 | 0.635423593 | no |
| OR5M10    | -0.023111588 | -0.610326466 | 0.541844511 | 0.635736555 | no |
| LOC283731 | -0.023103214 | -0.610105188 | 0.541990988 | 0.635871514 | no |
| TOP1      | 0.023099492  | 0.610006868  | 0.542056078 | 0.635910978 | no |
| USH1G     | -0.023073531 | -0.609320912 | 0.542510307 | 0.636406927 | no |
| CDK18     | 0.023054537  | 0.608819067  | 0.542842741 | 0.636759953 | no |
| CHST8     | 0.023049986  | 0.608698824  | 0.542922408 | 0.636816456 | no |

|             |              |              |             |             |    |
|-------------|--------------|--------------|-------------|-------------|----|
| AMN         | -0.023043446 | -0.60852602  | 0.54303691  | 0.636913809 | no |
| PNPLA1      | 0.02303762   | 0.608372081  | 0.543138921 | 0.636996503 | no |
| RUSC1       | 0.023031138  | 0.608200807  | 0.543252431 | 0.637092671 | no |
| PLUNC       | -0.023027403 | -0.608102127 | 0.543317836 | 0.637132417 | no |
| HIST1H1E    | 0.023017721  | 0.607846312  | 0.543487406 | 0.637294304 | no |
| ACAN        | -0.023007404 | -0.607573724 | 0.543668125 | 0.637469243 | no |
| RHOXF2B     | 0.0229875    | 0.607047816  | 0.544016872 | 0.637841169 | no |
| LINGO4      | -0.022979924 | -0.606847665 | 0.544149629 | 0.637959825 | no |
| TBC1D3C     | -0.022964064 | -0.606428616 | 0.544427628 | 0.63824874  | no |
| MAD1L1      | -0.022938117 | -0.605743036 | 0.544882597 | 0.638745077 | no |
| NACC2       | -0.022935252 | -0.605667343 | 0.544932841 | 0.638756378 | no |
| LOC90246    | 0.022933964  | 0.605633321  | 0.544955424 | 0.638756378 | no |
| SNORA46     | 0.022921944  | 0.605315716  | 0.545166274 | 0.638966477 | no |
| SNHG5       | -0.022908104 | -0.604950065 | 0.545409069 | 0.639213991 | no |
| HEPACAM2    | -0.022892798 | -0.604545637 | 0.545677677 | 0.639477538 | no |
| NCRNA00230B | 0.022891685  | 0.604516248  | 0.545697198 | 0.639477538 | no |
| RECQL4      | -0.022871836 | -0.603991806 | 0.546045618 | 0.639848749 | no |
| FAM32A      | 0.02286753   | 0.603878037  | 0.546121217 | 0.639900248 | no |
| KCTD20      | -0.022855556 | -0.603561657 | 0.546331476 | 0.640109515 | no |
| TUSC5       | -0.022853713 | -0.603512954 | 0.546363847 | 0.640110347 | no |
| SNORA74B    | 0.022849987  | 0.603414511  | 0.54642928  | 0.640149912 | no |
| GUCY1A3     | -0.022831934 | -0.602937537 | 0.546746371 | 0.640484276 | no |
| OCA2        | -0.022822576 | -0.60269028  | 0.546910782 | 0.640639756 | no |
| KCNQ3       | -0.022820407 | -0.602632978 | 0.546948888 | 0.640639798 | no |
| SPAG6       | 0.022818168  | 0.602573801  | 0.546988243 | 0.640639798 | no |
| LYPD4       | -0.022817164 | -0.602547285 | 0.547005877 | 0.640639798 | no |
| OR14A16     | -0.022805214 | -0.60223155  | 0.547215876 | 0.64084862  | no |
| KRTAP11-1   | 0.022774953  | 0.601432003  | 0.547747843 | 0.641434457 | no |
| RPL22L1     | 0.022770571  | 0.601316227  | 0.547824894 | 0.641487531 | no |
| OR3A2       | 0.022768754  | 0.601268219  | 0.547856846 | 0.641487793 | no |
| OR1E1       | -0.022763976 | -0.601141975 | 0.547940872 | 0.641549025 | no |
| DAPK3       | 0.022757071  | 0.600959561  | 0.548062296 | 0.641654033 | no |
| OR6C65      | 0.022753848  | 0.600874383  | 0.548118999 | 0.641683262 | no |
| CDC42EP1    | 0.022745334  | 0.600649439  | 0.548268759 | 0.641821422 | no |
| LOC729234   | 0.022733265  | 0.600330558  | 0.548481093 | 0.642002679 | no |
| RPL23AP53   | 0.022732165  | 0.600301504  | 0.548500442 | 0.642002679 | no |
| TLX3        | -0.022731118 | -0.600273849 | 0.548518858 | 0.642002679 | no |
| ZNF2        | -0.022728996 | -0.600217769 | 0.548556206 | 0.642009226 | no |
| APOC3       | -0.022720012 | -0.59998039  | 0.548714308 | 0.642157089 | no |
| CST8        | -0.022717226 | -0.599906796 | 0.548763328 | 0.64215725  | no |
| DAPL1       | -0.022716394 | -0.599884817 | 0.548777969 | 0.64215725  | no |
| LOC29034    | 0.022710121  | 0.599719075  | 0.548888377 | 0.642249274 | no |
| TNN         | 0.022686879  | 0.599104981  | 0.549297551 | 0.642690849 | no |
| MATN1       | -0.022680635 | -0.598940004 | 0.549407501 | 0.642782296 | no |
| KLHL2       | 0.02267691   | 0.598841592  | 0.549473094 | 0.642821839 | no |
| LIG4        | 0.022653303  | 0.598217867  | 0.549888905 | 0.643271068 | no |
| CHST11      | 0.022644797  | 0.597993149  | 0.550038752 | 0.643409135 | no |
| CARS        | 0.02264274   | 0.597938779  | 0.550075011 | 0.643414323 | no |
| EIF2S1      | -0.022637989 | -0.597813264 | 0.550158719 | 0.643475008 | no |
| MDM2        | 0.022633243  | 0.597687868  | 0.550242354 | 0.6435356   | no |
| GALT        | -0.022596595 | -0.596719586 | 0.550888378 | 0.64421959  | no |

|           |              |              |             |             |    |
|-----------|--------------|--------------|-------------|-------------|----|
| PTPN20A   | -0.022596451 | -0.596715787 | 0.550890914 | 0.64421959  | no |
| ENSA      | 0.022581318  | 0.59631595   | 0.551157789 | 0.644494401 | no |
| CLRN10S   | -0.022572634 | -0.596086508 | 0.551310961 | 0.644636228 | no |
| PDIK1L    | -0.022569245 | -0.595996988 | 0.551370729 | 0.64466883  | no |
| SIX6      | 0.022553151  | 0.595571765  | 0.551654673 | 0.644963521 | no |
| C16orf78  | -0.022542843 | -0.595299423 | 0.551836567 | 0.645138876 | no |
| C5orf52   | 0.022528409  | 0.594918063  | 0.552091323 | 0.645399386 | no |
| FBXL2     | -0.022525736 | -0.594847442 | 0.552138506 | 0.645417225 | no |
| BACE1     | -0.022515487 | -0.594576651 | 0.552319443 | 0.645591403 | no |
| TRNT1     | -0.022511925 | -0.594482541 | 0.552382332 | 0.645627587 | no |
| LOC151300 | -0.022497607 | -0.594104246 | 0.552635163 | 0.645885758 | no |
| CEACAM6   | -0.022487676 | -0.593841856 | 0.552810564 | 0.646053409 | no |
| PQLC1     | -0.022484428 | -0.593756042 | 0.552867934 | 0.646063991 | no |
| SLC1A3    | -0.022483545 | -0.593732718 | 0.552883528 | 0.646063991 | no |
| LOC442459 | -0.022471609 | -0.593417345 | 0.553094396 | 0.646273045 | no |
| SIDT1     | -0.022447449 | -0.59277903  | 0.553521314 | 0.646734507 | no |
| HOXC8     | 0.022436324  | 0.592485103  | 0.553717952 | 0.646926874 | no |
| DDX27     | -0.022404354 | -0.591640418 | 0.554283241 | 0.6475499   | no |
| EXOG      | -0.022384154 | -0.59110672  | 0.554640554 | 0.647929896 | no |
| NEDD4     | 0.022379186  | 0.590975481  | 0.554728436 | 0.647995119 | no |
| C14orf68  | -0.022376208 | -0.590896802 | 0.554781126 | 0.648019227 | no |
| KCNA7     | 0.022372234  | 0.590791803  | 0.554851445 | 0.648063924 | no |
| AZGP1     | 0.022330943  | 0.58970086   | 0.555582323 | 0.6488801   | no |
| KRTAP4-9  | -0.022323397 | -0.589501492 | 0.55571594  | 0.648998664 | no |
| EPHX1     | -0.022317117 | -0.589335578 | 0.555827149 | 0.649091047 | no |
| FAM158A   | -0.022314092 | -0.58925565  | 0.555880726 | 0.649116122 | no |
| CRY1      | 0.022310226  | 0.589153503  | 0.555949202 | 0.649158589 | no |
| SIDT2     | 0.022306365  | 0.589051511  | 0.556017578 | 0.649200935 | no |
| UGT1A10   | 0.022303488  | 0.588975502  | 0.556068537 | 0.649222942 | no |
| FAM157A   | 0.022279871  | 0.588351529  | 0.556486959 | 0.649673942 | no |
| NRN1      | -0.022267316 | -0.588019801 | 0.55670947  | 0.64987953  | no |
| HERC3     | -0.022266307 | -0.587993156 | 0.556727345 | 0.64987953  | no |
| SLC39A3   | 0.022247593  | 0.587498716  | 0.557059083 | 0.650229233 | no |
| C3orf65   | 0.022244026  | 0.587404468  | 0.557122329 | 0.650265514 | no |
| FBXL21    | -0.022240896 | -0.587321783 | 0.557177818 | 0.650292739 | no |
| RMI1      | -0.022226116 | -0.586931283 | 0.557439915 | 0.650561083 | no |
| WDR46     | 0.022210627  | 0.586522075  | 0.557714633 | 0.650806035 | no |
| S1PR2     | 0.02220954   | 0.586493347  | 0.557733921 | 0.650806035 | no |
| ACLY      | -0.022208838 | -0.586474802 | 0.557746373 | 0.650806035 | no |
| EEF1A1    | -0.022205557 | -0.586388116 | 0.557804579 | 0.650816    | no |
| UBE2E3    | 0.022204728  | 0.586366204  | 0.557819293 | 0.650816    | no |
| MDH2      | 0.022198596  | 0.586204194  | 0.557928085 | 0.650876975 | no |
| DVWA      | -0.022195949 | -0.586134265 | 0.557975047 | 0.650876975 | no |
| OR9G4     | -0.022195675 | -0.586127033 | 0.557979904 | 0.650876975 | no |
| C20orf71  | -0.022194524 | -0.586096622 | 0.558000327 | 0.650876975 | no |
| MAP7D1    | -0.02218344  | -0.585803783 | 0.558197011 | 0.651068834 | no |
| POLR3K    | 0.022174754  | 0.585574278  | 0.558351181 | 0.651211086 | no |
| DDX26B    | 0.022172905  | 0.585525447  | 0.558383986 | 0.651211781 | no |
| CCNE2     | 0.022167539  | 0.585383677  | 0.558479233 | 0.651285293 | no |
| NXF2B     | -0.022158788 | -0.585152471 | 0.558634584 | 0.651428886 | no |
| AMIGO3    | 0.02215694   | 0.585103629  | 0.558667404 | 0.651429585 | no |

|              |              |              |             |             |    |
|--------------|--------------|--------------|-------------|-------------|----|
| KRTAP1-1     | -0.022144941 | -0.584786633 | 0.558880439 | 0.651640411 | no |
| NSUN5P1      | -0.02212985  | -0.584387911 | 0.559148453 | 0.651915312 | no |
| TAS2R39      | -0.022117767 | -0.584068696 | 0.559363069 | 0.652127928 | no |
| CCDC163P     | 0.022114366  | 0.583978836  | 0.559423491 | 0.652137337 | no |
| AHSA2        | -0.022113682 | -0.583960755 | 0.55943565  | 0.652137337 | no |
| SLC30A4      | -0.022099346 | -0.583581996 | 0.559690367 | 0.652396647 | no |
| OR52E4       | -0.022095314 | -0.583475485 | 0.559762006 | 0.652442536 | no |
| LOC402644    | -0.022086365 | -0.583239046 | 0.55992105  | 0.652590292 | no |
| LPO          | -0.022082416 | -0.583134696 | 0.55999125  | 0.652634488 | no |
| LOC100170939 | 0.022078328  | 0.583026709  | 0.560063901 | 0.652681535 | no |
| MEG8         | 0.022064793  | 0.582669114  | 0.560304515 | 0.652910581 | no |
| VPS13A       | -0.022063639 | -0.582638626 | 0.560325031 | 0.652910581 | no |
| GUCA1A       | 0.022052954  | 0.582356329  | 0.560515018 | 0.65309432  | no |
| SCARNA16     | 0.022034318  | 0.581863952  | 0.560846465 | 0.653442853 | no |
| GPATCH2      | -0.022026511 | -0.581657683 | 0.560985344 | 0.653558975 | no |
| MUC21        | 0.022025081  | 0.581619904  | 0.561010783 | 0.653558975 | no |
| OR2A14       | -0.022018553 | -0.581447442 | 0.561126916 | 0.653656602 | no |
| RAPSN        | 0.022016549  | 0.581394511  | 0.561162561 | 0.653660463 | no |
| SLC7A2       | 0.022008952  | 0.581193775  | 0.561297752 | 0.653780271 | no |
| POP7         | -0.021988031 | -0.580641048 | 0.561670082 | 0.654176261 | no |
| TBL1XR1      | -0.021985898 | -0.580584694 | 0.561708049 | 0.654182796 | no |
| AMZ2P1       | -0.021980469 | -0.580441279 | 0.56180468  | 0.654257648 | no |
| FGFR10P2     | 0.021973801  | 0.580265092  | 0.561923402 | 0.654358216 | no |
| MASTL        | 0.021971015  | 0.580191491  | 0.561973002 | 0.654378285 | no |
| CSH1         | -0.021957188 | -0.579826178 | 0.562219216 | 0.654627281 | no |
| FAM65B       | 0.021951145  | 0.579666539  | 0.562326825 | 0.654714872 | no |
| SNORA42      | 0.021940479  | 0.579384736  | 0.562516808 | 0.654898354 | no |
| ZNF547       | -0.021937444 | -0.579304547 | 0.562570875 | 0.654923587 | no |
| FOXF1        | 0.021923388  | 0.578933194  | 0.562821288 | 0.655177384 | no |
| LGALS7       | 0.021913342  | 0.578667774  | 0.563000301 | 0.655348039 | no |
| RPLP2        | -0.021908704 | -0.578545251 | 0.563082946 | 0.655406506 | no |
| KIAA0319L    | 0.021898453  | 0.578274423  | 0.563265648 | 0.655581421 | no |
| PPAP2C       | 0.021894404  | 0.57816745   | 0.56333782  | 0.655590253 | no |
| SCARNA10     | 0.021894389  | 0.578167053  | 0.563338088 | 0.655590253 | no |
| RBBP9        | 0.021887696  | 0.577990233  | 0.563457395 | 0.655674622 | no |
| CCNF         | 0.021886334  | 0.577954246  | 0.563481677 | 0.655674622 | no |
| HIGD2A       | 0.021884865  | 0.577915422  | 0.563507875 | 0.655674622 | no |
| RASA3        | -0.021876371 | -0.577691017 | 0.563659313 | 0.655780647 | no |
| CFHR1        | 0.021876116  | 0.577684268  | 0.563663868 | 0.655780647 | no |
| ZNF226       | 0.021859248  | 0.577238645  | 0.563964652 | 0.656092832 | no |
| TCEB2        | -0.021831847 | -0.576514713 | 0.564453453 | 0.6566237   | no |
| IQCF2        | -0.021823467 | -0.57629331  | 0.564602986 | 0.656759863 | no |
| LOC149134    | -0.021819036 | -0.576176254 | 0.564682052 | 0.656814045 | no |
| OR7A10       | -0.021807335 | -0.575867122 | 0.564890881 | 0.657019147 | no |
| KGFLP1       | -0.021794628 | -0.575531408 | 0.56511771  | 0.65724516  | no |
| RAGE         | -0.021785316 | -0.575285373 | 0.565283975 | 0.657400713 | no |
| APH1B        | -0.021767681 | -0.574819475 | 0.565598882 | 0.657729103 | no |
| C15orf55     | 0.021762475  | 0.574681937  | 0.565691861 | 0.657799394 | no |
| OR51L1       | -0.021717705 | -0.573499119 | 0.566491786 | 0.658691679 | no |
| DGCR11       | -0.021711437 | -0.57333353  | 0.566603815 | 0.658784055 | no |
| C13orf39     | -0.021686864 | -0.572684337 | 0.567043129 | 0.659256928 | no |

|            |              |              |             |             |    |
|------------|--------------|--------------|-------------|-------------|----|
| TMEM8C     | -0.021677566 | -0.572438675 | 0.567209413 | 0.659412334 | no |
| ZCCHC13    | 0.021667948  | 0.572184574  | 0.567381433 | 0.659572108 | no |
| YBX1       | 0.021666234  | 0.572139291  | 0.567412091 | 0.659572108 | no |
| OR6C68     | 0.021659232  | 0.571954307  | 0.567537341 | 0.659679772 | no |
| ALPL       | -0.021653813 | -0.571811134 | 0.567634289 | 0.659754531 | no |
| COMMD2     | 0.021651283  | 0.571744304  | 0.567679546 | 0.659769203 | no |
| SP011      | -0.021649269 | -0.571691084 | 0.567715587 | 0.659773164 | no |
| EFNA5      | -0.021627492 | -0.571115768 | 0.568105265 | 0.660188082 | no |
| CCDC50     | -0.021625223 | -0.57105581  | 0.568145884 | 0.660197338 | no |
| MOSPD3     | 0.021621681  | 0.570962242  | 0.568209275 | 0.660233053 | no |
| LOC285735  | -0.021616575 | -0.570827349 | 0.568300669 | 0.660301038 | no |
| PIBF1      | 0.021614763  | 0.57077948   | 0.568333102 | 0.660301038 | no |
| ZNF654     | -0.021600104 | -0.57039219  | 0.568595548 | 0.660543712 | no |
| DEPDC7     | 0.021597657  | 0.570327549  | 0.568639358 | 0.660543712 | no |
| MAPRE1     | 0.021597622  | 0.570326616  | 0.56863999  | 0.660543712 | no |
| MDM4       | 0.021595428  | 0.57026864   | 0.568679284 | 0.660551405 | no |
| DPYSL2     | -0.021546178 | -0.568967517 | 0.569561472 | 0.66147769  | no |
| KCNS3      | 0.021545525  | 0.568950242  | 0.569573189 | 0.66147769  | no |
| OR13A1     | -0.02154543  | -0.568947735 | 0.569574889 | 0.66147769  | no |
| OR1M1      | 0.021535917  | 0.56869643   | 0.569745357 | 0.661604991 | no |
| FAM55C     | -0.021535661 | -0.568689658 | 0.569749951 | 0.661604991 | no |
| NCRNA00085 | -0.021529808 | -0.568535014 | 0.569854863 | 0.661688813 | no |
| NKD2       | -0.021524669 | -0.568399256 | 0.56994697  | 0.661738748 | no |
| HIST1H2BI  | 0.021523756  | 0.568375147  | 0.569963328 | 0.661738748 | no |
| OR5J2      | -0.021515509 | -0.568157264 | 0.570111171 | 0.661872389 | no |
| MAL        | -0.021482711 | -0.56729076  | 0.570699313 | 0.662449958 | no |
| SNX21      | 0.021482648  | 0.567289088  | 0.570700448 | 0.662449958 | no |
| LIME1      | 0.021482284  | 0.567279492  | 0.570706962 | 0.662449958 | no |
| KRTAP13-3  | -0.021474482 | -0.567073363 | 0.570846917 | 0.66257437  | no |
| TJP3       | -0.021464417 | -0.56680745  | 0.571027486 | 0.662724253 | no |
| AHDC1      | -0.02146363  | -0.566786656 | 0.571041607 | 0.662724253 | no |
| OR52A5     | 0.021444324  | 0.566276619  | 0.571388031 | 0.66305687  | no |
| USP17L6P   | -0.021442718 | -0.566234185 | 0.571416856 | 0.66305687  | no |
| SLC7A5P2   | -0.021442091 | -0.566217635 | 0.571428099 | 0.66305687  | no |
| POLR2I     | 0.021440348  | 0.566171574  | 0.57145939  | 0.66305687  | no |
| SAE1       | 0.0214315    | 0.565937809  | 0.571618209 | 0.663203085 | no |
| TIRAP      | 0.021427997  | 0.565845283  | 0.571681077 | 0.663237964 | no |
| FAM151A    | -0.021409357 | -0.565352814 | 0.572015745 | 0.663588153 | no |
| PKMYT1     | -0.02139535  | -0.56498277  | 0.572267277 | 0.663841862 | no |
| SKP1       | -0.021386873 | -0.564758818 | 0.572419531 | 0.663980383 | no |
| SH3TC2     | -0.0213797   | -0.56456932  | 0.572548376 | 0.664068563 | no |
| OR5W2      | -0.021378984 | -0.564550399 | 0.572561242 | 0.664068563 | no |
| SMR3A      | 0.021347116  | 0.563708495  | 0.573133851 | 0.664671038 | no |
| OR5B2      | -0.021346415 | -0.563689979 | 0.573146447 | 0.664671038 | no |
| LOC400794  | -0.021340004 | -0.563520601 | 0.573261682 | 0.664766543 | no |
| FOXF2      | 0.021337542  | 0.563455569  | 0.573305928 | 0.664779723 | no |
| PKP3       | 0.021333745  | 0.563355248  | 0.573374188 | 0.664820745 | no |
| MYO3B      | -0.021331615 | -0.563298982 | 0.573412474 | 0.664827009 | no |
| SEMA7A     | 0.021326535  | 0.563164776  | 0.573503798 | 0.664894764 | no |
| FOXR2      | -0.021315899 | -0.562883784 | 0.57369503  | 0.665048475 | no |
| SOSTDC1    | -0.021315502 | -0.562873295 | 0.573702169 | 0.665048475 | no |

|           |              |              |             |             |    |
|-----------|--------------|--------------|-------------|-------------|----|
| SLC13A5   | -0.021313091 | -0.562809595 | 0.573745525 | 0.665060602 | no |
| HEPHL1    | 0.02131066   | 0.562745365  | 0.573789244 | 0.665073149 | no |
| FBX025    | -0.02130631  | -0.562630445 | 0.573867469 | 0.665114104 | no |
| C1orf49   | -0.021305036 | -0.562596799 | 0.573890372 | 0.665114104 | no |
| C1orf157  | -0.021281652 | -0.56197902  | 0.574310982 | 0.66556342  | no |
| RIN2      | -0.021277523 | -0.561869919 | 0.574385278 | 0.665583233 | no |
| FLG2      | -0.021273238 | -0.561756735 | 0.574462359 | 0.665583233 | no |
| AKR1D1    | 0.021273071  | 0.561752323  | 0.574465363 | 0.665583233 | no |
| CBLN4     | -0.021272623 | -0.561740487 | 0.574473424 | 0.665583233 | no |
| PRM2      | -0.021271553 | -0.561712214 | 0.57449268  | 0.665583233 | no |
| RBMY2FP   | -0.021269114 | -0.561647765 | 0.574536574 | 0.665595947 | no |
| KRTAP12-2 | -0.02126383  | -0.561508184 | 0.574631645 | 0.665667942 | no |
| BOK       | -0.021259662 | -0.561398076 | 0.574706646 | 0.665716682 | no |
| USP8      | 0.021256032  | 0.561302175  | 0.574771974 | 0.665754212 | no |
| PRAMEF22  | -0.021253964 | -0.561247537 | 0.574809195 | 0.665759183 | no |
| RAD50     | -0.021215512 | -0.560231677 | 0.575501438 | 0.66649749  | no |
| TTYT5     | -0.021214893 | -0.560215343 | 0.575512572 | 0.66649749  | no |
| PPP4R1    | -0.021194091 | -0.559665768 | 0.575887239 | 0.666893189 | no |
| RFX6      | 0.021179504  | 0.559280396  | 0.576150031 | 0.667133851 | no |
| HIST1H2BM | 0.021178892  | 0.559264236  | 0.576161053 | 0.667133851 | no |
| CYP4F2    | 0.021174806  | 0.559156288  | 0.576234675 | 0.667180888 | no |
| SPATA7    | -0.021170103 | -0.55903205  | 0.576319414 | 0.667240789 | no |
| ZNF879    | 0.021168008  | 0.558976697  | 0.57635717  | 0.667246293 | no |
| C2orf61   | -0.021155119 | -0.558636183 | 0.576589459 | 0.667476993 | no |
| MAP4      | -0.021138436 | -0.558195452 | 0.57689018  | 0.66778688  | no |
| AFM       | 0.021124737  | 0.557833536  | 0.577137178 | 0.668034549 | no |
| CYP4F22   | 0.021109885  | 0.557441174  | 0.577405012 | 0.668306305 | no |
| YTHDF1    | 0.02109756   | 0.557115571  | 0.57762732  | 0.668525339 | no |
| PRKCSH    | -0.021091494 | -0.556955302 | 0.577736759 | 0.668613726 | no |
| NEB       | -0.021069078 | -0.556363109 | 0.578141222 | 0.669043514 | no |
| FAM24A    | 0.021067202  | 0.556313571  | 0.578175062 | 0.66904438  | no |
| XK        | -0.021049414 | -0.555843632 | 0.57849613  | 0.66934838  | no |
| VDAC3     | -0.021048979 | -0.555832136 | 0.578503986 | 0.66934838  | no |
| SCARNA18  | 0.02104361   | 0.55569031   | 0.5786009   | 0.669422203 | no |
| TPRXL     | -0.021033331 | -0.555418748 | 0.578786489 | 0.669592146 | no |
| RNASE8    | 0.021031647  | 0.555374263  | 0.578816893 | 0.669592146 | no |
| BDH1      | 0.021029972  | 0.555330005  | 0.578847143 | 0.669592146 | no |
| FAM128B   | -0.021020297 | -0.555074413 | 0.579021851 | 0.669755924 | no |
| C4orf17   | 0.021017269  | 0.554994419  | 0.579076536 | 0.669780859 | no |
| FAM194B   | 0.0210143    | 0.554915966  | 0.57913017  | 0.669804575 | no |
| UBE2E1    | 0.021010044  | 0.554803543  | 0.579207031 | 0.669855151 | no |
| DEFB112   | -0.020994269 | -0.554386791 | 0.579491996 | 0.670146381 | no |
| ZNF222    | -0.020987947 | -0.554219767 | 0.579606221 | 0.670240138 | no |
| CTDSP2    | -0.02098396  | -0.554114448 | 0.579678253 | 0.670285097 | no |
| TRIO      | -0.020980525 | -0.554023696 | 0.579740325 | 0.670318535 | no |
| ZNF415    | -0.020973758 | -0.553844944 | 0.579862597 | 0.670395049 | no |
| SNRPF     | -0.020971782 | -0.553792735 | 0.579898311 | 0.670395049 | no |
| SCARNA1   | 0.020971358  | 0.553781531  | 0.579905975 | 0.670395049 | no |
| BDH2      | 0.020962778  | 0.553554851  | 0.580061054 | 0.670535985 | no |
| DLX6      | -0.020957421 | -0.553413344 | 0.580157872 | 0.670609563 | no |
| OR4A47    | -0.020950961 | -0.553242671 | 0.580274657 | 0.670706209 | no |



|              |              |              |             |             |    |
|--------------|--------------|--------------|-------------|-------------|----|
| ZNF266       | -0.020945722 | -0.553104266 | 0.580369369 | 0.670777334 | no |
| FEV          | -0.020942217 | -0.553011677 | 0.580432734 | 0.670812222 | no |
| FAM195A      | -0.020934652 | -0.552811825 | 0.580569515 | 0.67093195  | no |
| ST70T4       | 0.020925477  | 0.552569446  | 0.580735423 | 0.671085322 | no |
| IYD          | -0.020913322 | -0.55224833  | 0.580955261 | 0.671300992 | no |
| FIG4         | 0.020906964  | 0.552080368  | 0.581070264 | 0.671376407 | no |
| OR5K4        | -0.020906042 | -0.552056014 | 0.58108694  | 0.671376407 | no |
| CSRNP1       | -0.020896531 | -0.551804739 | 0.581259009 | 0.671511638 | no |
| C6orf59      | -0.020895901 | -0.55178809  | 0.581270411 | 0.671511638 | no |
| GPX6         | -0.020887801 | -0.551574106 | 0.581416965 | 0.671642566 | no |
| OR5D13       | 0.020880791  | 0.551388907  | 0.581543818 | 0.671750724 | no |
| FER          | 0.020869658  | 0.551094796  | 0.581745298 | 0.671945066 | no |
| CCDC129      | 0.020861764  | 0.550886276  | 0.581888163 | 0.672071687 | no |
| LOC100287227 | 0.020851002  | 0.550601963  | 0.582082985 | 0.672236064 | no |
| VEGFB        | 0.020850229  | 0.550581537  | 0.582096982 | 0.672236064 | no |
| ZBTB40       | -0.020847353 | -0.550505543 | 0.582149061 | 0.672257809 | no |
| LENG8        | -0.02084465  | -0.550434141 | 0.582197996 | 0.67227592  | no |
| OR7G1        | -0.02083946  | -0.550297045 | 0.582291959 | 0.672346021 | no |
| TTY13        | -0.020836303 | -0.550213626 | 0.582349135 | 0.67237364  | no |
| HS3ST5       | -0.020832458 | -0.550112059 | 0.582418755 | 0.672396963 | no |
| PRM3         | 0.020830727  | 0.55006634   | 0.582450095 | 0.672396963 | no |
| FBX07        | -0.020829678 | -0.550038604 | 0.582469107 | 0.672396963 | no |
| TRIML1       | -0.020798766 | -0.549221988 | 0.583029024 | 0.673004899 | no |
| FIP1L1       | -0.020789315 | -0.548972311 | 0.583200267 | 0.673164135 | no |
| ZNF565       | 0.02078293   | 0.548803631  | 0.58331597  | 0.67325925  | no |
| FASTK        | -0.020780357 | -0.548735648 | 0.583362605 | 0.673274641 | no |
| KIAA1430     | 0.020777564  | 0.548661881  | 0.58341321  | 0.67329461  | no |
| SCGB3A1      | -0.020754038 | -0.548040361 | 0.583839658 | 0.673748299 | no |
| TCP10        | 0.020741458  | 0.547708039  | 0.584067736 | 0.673973032 | no |
| TMEM66       | 0.020732887  | 0.547481608  | 0.584223163 | 0.674113909 | no |
| ANKRD13A     | 0.020729307  | 0.547387017  | 0.584288098 | 0.674150361 | no |
| NPAS1        | -0.020725555 | -0.547287907 | 0.584356139 | 0.674190391 | no |
| PCDHGB6      | -0.020715638 | -0.547025916 | 0.584536019 | 0.674359443 | no |
| DHX40P1      | -0.02071086  | -0.546899693 | 0.584622691 | 0.674420949 | no |
| SLC6A5       | -0.020701908 | -0.546663218 | 0.584785085 | 0.674569798 | no |
| TEX101       | -0.020693622 | -0.546444309 | 0.584935435 | 0.674702801 | no |
| CCDC72       | 0.020691875  | 0.546398167  | 0.584967128 | 0.674702801 | no |
| IRF6         | 0.020686825  | 0.546264763  | 0.585058763 | 0.674750445 | no |
| ZDBF2        | -0.020684135 | -0.546193681 | 0.585107591 | 0.674750445 | no |
| TEKT2        | 0.020684082  | 0.546192275  | 0.585108557 | 0.674750445 | no |
| WNK1         | -0.020681469 | -0.546123255 | 0.585155971 | 0.674766636 | no |
| C10orf113    | -0.020675335 | -0.545961207 | 0.585267299 | 0.674856522 | no |
| SSX7         | -0.020670161 | -0.545824513 | 0.585361216 | 0.674876351 | no |
| ZNF260       | -0.020670038 | -0.545821284 | 0.585363435 | 0.674876351 | no |
| SNRPE        | 0.02066887   | 0.545790428  | 0.585384636 | 0.674876351 | no |
| MOBP         | -0.02066622  | -0.545720409 | 0.585432747 | 0.674893333 | no |
| CATSPERG     | 0.020663203  | 0.545640716  | 0.585487507 | 0.674917978 | no |
| OR51A7       | -0.020659826 | -0.545551504 | 0.585548811 | 0.674950163 | no |
| UGT2B4       | 0.020655343  | 0.545433076  | 0.585630196 | 0.675005491 | no |
| KRBA1        | -0.020652087 | -0.545347039 | 0.585689325 | 0.67503516  | no |
| OR2Y1        | -0.020645441 | -0.545171488 | 0.585809981 | 0.67511585  | no |

|              |              |              |             |             |    |
|--------------|--------------|--------------|-------------|-------------|----|
| C6orf203     | -0.020644553 | -0.54514801  | 0.585826119 | 0.67511585  | no |
| NHSL2        | 0.020639738  | 0.545020832  | 0.585913536 | 0.675149275 | no |
| RFC3         | 0.020639277  | 0.54500865   | 0.58592191  | 0.675149275 | no |
| KRTAP21-1    | -0.020627377 | -0.544694283 | 0.586138023 | 0.675359808 | no |
| ROS1         | 0.020619007  | 0.544473154  | 0.58629006  | 0.675496492 | no |
| C1orf152     | 0.020614242  | 0.544347274  | 0.586376618 | 0.675557722 | no |
| RPS27        | -0.020610771 | -0.544255573 | 0.586439677 | 0.675591874 | no |
| OR4D11       | -0.020602039 | -0.544024915 | 0.586598304 | 0.675736113 | no |
| AMFR         | 0.020591635  | 0.543750042  | 0.586787366 | 0.675915392 | no |
| LOC729375    | 0.020561735  | 0.542960166  | 0.58733081  | 0.676479286 | no |
| TTY2         | -0.020560328 | -0.54292299  | 0.587356394 | 0.676479286 | no |
| ZNF662       | -0.020559179 | -0.542892639 | 0.587377281 | 0.676479286 | no |
| RNF11        | -0.020550013 | -0.542650507 | 0.587543924 | 0.676605451 | no |
| RRM1         | 0.020549472  | 0.542636217  | 0.587553759 | 0.676605451 | no |
| SYNP02       | 0.020543078  | 0.542467291  | 0.587670033 | 0.676668617 | no |
| SALL4        | 0.020542774  | 0.542459278  | 0.587675549 | 0.676668617 | no |
| KLHL7        | -0.020536506 | -0.542293676 | 0.587789546 | 0.676761335 | no |
| RBMY1J       | -0.020530298 | -0.542129694 | 0.587902438 | 0.676852769 | no |
| LOC100133991 | 0.02051989   | 0.541854722  | 0.588091762 | 0.677032186 | no |
| WDYHV1       | -0.020511783 | -0.541640555 | 0.58823924  | 0.677132653 | no |
| OR2T33       | -0.02051141  | -0.541630718 | 0.588246014 | 0.677132653 | no |
| LRRC29       | 0.020485746  | 0.540952731  | 0.588713001 | 0.677631622 | no |
| TBRG4        | 0.020482375  | 0.540863677  | 0.588774353 | 0.677637978 | no |
| OR52E8       | -0.020481759 | -0.540847417 | 0.588785555 | 0.677637978 | no |
| TMEM132A     | 0.020476282  | 0.540702717  | 0.58888525  | 0.677714138 | no |
| C22orf42     | 0.020467383  | 0.540467633  | 0.589047234 | 0.677861972 | no |
| OR4D5        | -0.0204538   | -0.54010881  | 0.58929452  | 0.678107945 | no |
| LCLAT1       | -0.020434576 | -0.539600957 | 0.589644593 | 0.678472163 | no |
| C7orf72      | -0.020419781 | -0.539210118 | 0.589914071 | 0.678743608 | no |
| KLHDC10      | -0.020403953 | -0.538791991 | 0.590202427 | 0.679036742 | no |
| KIAA1377     | -0.020395074 | -0.538557423 | 0.590364223 | 0.679184241 | no |
| RNASE12      | 0.020363905  | 0.537734024  | 0.590932331 | 0.679799139 | no |
| SAMD4B       | 0.020359477  | 0.537617052  | 0.591013057 | 0.679853322 | no |
| DYRK2        | 0.020354906  | 0.537496309  | 0.591096391 | 0.679910498 | no |
| OR8H2        | -0.02033449  | -0.536956958 | 0.591468703 | 0.680300047 | no |
| GUCA1C       | -0.020327445 | -0.536770858 | 0.591597193 | 0.680409127 | no |
| C1orf135     | 0.020317742  | 0.536514522  | 0.591774196 | 0.680573987 | no |
| HEATR4       | 0.020288787  | 0.535749627  | 0.592302511 | 0.681141265 | no |
| KRTAP5-3     | -0.020287016 | -0.535702837 | 0.592334836 | 0.681141265 | no |
| CLPB         | -0.020276304 | -0.535419862 | 0.592530348 | 0.681327337 | no |
| USF1         | 0.020269279  | 0.535234273  | 0.59265859  | 0.681436042 | no |
| DUSP12       | -0.020261561 | -0.535030401 | 0.59279948  | 0.681559278 | no |
| ZNF569       | -0.020251022 | -0.534751978 | 0.592991916 | 0.681741758 | no |
| UGT1A3       | -0.020241235 | -0.534493429 | 0.593170641 | 0.681908456 | no |
| LAPTM4B      | -0.020236951 | -0.53438026  | 0.593248879 | 0.681933977 | no |
| OR56A1       | -0.020232587 | -0.534265001 | 0.593328566 | 0.681933977 | no |
| ZCWPW2       | -0.020231778 | -0.534243615 | 0.593343352 | 0.681933977 | no |
| SLC27A2      | -0.020230998 | -0.534223022 | 0.593357589 | 0.681933977 | no |
| TAS2R46      | -0.020230785 | -0.534217387 | 0.593361486 | 0.681933977 | no |
| SLC25A2      | -0.020202922 | -0.533481329 | 0.593870505 | 0.682480184 | no |
| NR2C2AP      | 0.020189423  | 0.533124738  | 0.594117177 | 0.682724854 | no |

|              |              |              |             |             |    |
|--------------|--------------|--------------|-------------|-------------|----|
| PXMP4        | -0.020167041 | -0.532533454 | 0.594526301 | 0.683156167 | no |
| RBM20        | 0.02016242   | 0.532411385  | 0.59461078  | 0.683214409 | no |
| L3MBTL2      | 0.020106263  | 0.5309279    | 0.595637873 | 0.684355659 | no |
| SLC6A3       | 0.020102822  | 0.530836994  | 0.595700839 | 0.68438911  | no |
| PAX9         | -0.020096328 | -0.530665463 | 0.595819657 | 0.684452229 | no |
| DAOA         | -0.020096119 | -0.530659935 | 0.595823486 | 0.684452229 | no |
| GCGR         | 0.020093292  | 0.530585243  | 0.595875228 | 0.684472778 | no |
| BBOX1        | -0.020076863 | -0.530151252 | 0.596175911 | 0.684779262 | no |
| LOC388946    | -0.020063363 | -0.529794618 | 0.59642305  | 0.685024213 | no |
| CYP2U1       | 0.020060454  | 0.529717777  | 0.596476305 | 0.685046463 | no |
| PSKH2        | -0.020055971 | -0.529599361 | 0.596558378 | 0.685101805 | no |
| C12orf54     | -0.020048698 | -0.529407235 | 0.59669155  | 0.685215822 | no |
| CFHR2        | 0.020045971  | 0.52933518   | 0.596741498 | 0.68523426  | no |
| TMPRSS12     | -0.020042775 | -0.529250752 | 0.596800026 | 0.685262547 | no |
| SLC23A1      | 0.020023737  | 0.528747829  | 0.59714872  | 0.685623989 | no |
| SAMD5        | -0.020019228 | -0.528628733 | 0.597231307 | 0.685679873 | no |
| OR4S1        | -0.020016418 | -0.528554502 | 0.597282785 | 0.685700037 | no |
| KRTAP10-1    | 0.020014418  | 0.528501672  | 0.597319423 | 0.685703163 | no |
| ZBTB41       | -0.020010543 | -0.528399294 | 0.597390426 | 0.685745735 | no |
| SNORA18      | 0.020006874  | 0.528302369  | 0.59745765  | 0.685783966 | no |
| BAIAP3       | -0.020001666 | -0.528164792 | 0.597553076 | 0.685854561 | no |
| FDXACB1      | 0.019997672  | 0.528059276  | 0.597626268 | 0.68589963  | no |
| C18orf25     | 0.019995802  | 0.52800988   | 0.597660534 | 0.685900021 | no |
| MARS         | 0.019976428  | 0.527498107  | 0.598015598 | 0.686268552 | no |
| C10orf118    | -0.019964574 | -0.527184965 | 0.5982329   | 0.686478958 | no |
| LGI1         | -0.019961997 | -0.527116872 | 0.598280157 | 0.686494224 | no |
| PDSS2        | 0.019934332  | 0.526386052  | 0.598787462 | 0.687037336 | no |
| ATF4         | 0.019931035  | 0.526298979  | 0.598847917 | 0.68706771  | no |
| POTEG        | -0.01992376  | -0.526106792 | 0.598981364 | 0.687181821 | no |
| CDY1B        | -0.019910494 | -0.525756346 | 0.599224734 | 0.68742202  | no |
| FTHL17       | -0.019897812 | -0.525421343 | 0.599457422 | 0.687649938 | no |
| LOC100130015 | -0.019892696 | -0.525286176 | 0.599551318 | 0.687718629 | no |
| ITPR1        | -0.019888213 | -0.525167765 | 0.59963358  | 0.687773968 | no |
| DEFB108B     | -0.019878237 | -0.524904241 | 0.599816673 | 0.687944945 | no |
| PANX3        | 0.019872629  | 0.524756078  | 0.599919626 | 0.688007912 | no |
| CNDP1        | 0.019871203  | 0.524718408  | 0.599945803 | 0.688007912 | no |
| PCNAP1       | 0.019869685  | 0.524678318  | 0.599973661 | 0.688007912 | no |
| GSTA5        | -0.019862027 | -0.524476033 | 0.60011424  | 0.688130088 | no |
| OR4P4        | -0.019858714 | -0.524388501 | 0.600175075 | 0.688160816 | no |
| SUGT1        | -0.019847978 | -0.524104894 | 0.600372203 | 0.688347806 | no |
| STIM1        | 0.019830729  | 0.52364923   | 0.600688984 | 0.68863276  | no |
| TMPRSS11A    | -0.019828087 | -0.523579455 | 0.600737499 | 0.68863276  | no |
| OR5AR1       | -0.019827386 | -0.523560938 | 0.600750375 | 0.68863276  | no |
| MORF4L1      | -0.019827027 | -0.523551438 | 0.60075698  | 0.68863276  | no |
| TRRAP        | -0.01982454  | -0.52348576  | 0.600802649 | 0.688646066 | no |
| WDR62        | 0.019806477  | 0.523008601  | 0.601134483 | 0.688987357 | no |
| EID1         | -0.019802584 | -0.522905753 | 0.601206019 | 0.689023802 | no |
| ASB12        | -0.019801037 | -0.522864892 | 0.60123444  | 0.689023802 | no |
| KRTAP10-11   | -0.019798118 | -0.522787772 | 0.601288084 | 0.689046222 | no |
| KRT72        | 0.019773442  | 0.522135937  | 0.601741581 | 0.689499509 | no |
| C6orf57      | 0.019772884  | 0.522121185  | 0.601751847 | 0.689499509 | no |

|           |              |              |             |             |    |
|-----------|--------------|--------------|-------------|-------------|----|
| FCF1      | 0.01976907   | 0.522020442  | 0.60182195  | 0.689540757 | no |
| RTN4IP1   | 0.019761677  | 0.521825138  | 0.601957867 | 0.6896574   | no |
| POU3F2    | -0.019756517 | -0.521688832 | 0.602052733 | 0.689727003 | no |
| LRRRC66   | 0.019744742  | 0.521377788  | 0.602269238 | 0.689935943 | no |
| ZNF548    | 0.019724077  | 0.520831888  | 0.602649303 | 0.690332216 | no |
| IQCA1     | 0.019714832  | 0.520587669  | 0.602819368 | 0.690487903 | no |
| C8orf83   | -0.019712456 | -0.52052491  | 0.602863074 | 0.690498846 | no |
| E2F1      | 0.019708577  | 0.520422436  | 0.602934442 | 0.690541468 | no |
| DLGAP4    | -0.019704629 | -0.520318165 | 0.603007065 | 0.690585524 | no |
| FAM102A   | -0.019681281 | -0.519701396 | 0.603436715 | 0.691020057 | no |
| BEYLA     | -0.019680296 | -0.51967537  | 0.603454848 | 0.691020057 | no |
| ALDH9A1   | -0.019669861 | -0.519399709 | 0.603646925 | 0.691200857 | no |
| ERH       | -0.019663709 | -0.519237199 | 0.603760173 | 0.691291379 | no |
| DOCK10    | 0.01965585   | 0.519029593  | 0.60390486  | 0.691417886 | no |
| FGFR3     | -0.019649242 | -0.518855034 | 0.604026528 | 0.691518026 | no |
| LIN28A    | -0.019631084 | -0.518375375 | 0.604360907 | 0.691861663 | no |
| NBEAL1    | 0.01961472   | 0.517943114  | 0.604662317 | 0.692167519 | no |
| C12orf56  | 0.01956986   | 0.516758095  | 0.605488959 | 0.693074549 | no |
| PHOX2A    | 0.019560048  | 0.516498893  | 0.60566984  | 0.693242348 | no |
| C2orf86   | 0.019552895  | 0.516309945  | 0.605801711 | 0.693354033 | no |
| RAX       | -0.019543213 | -0.516054193 | 0.605980225 | 0.693519087 | no |
| ZNF426    | 0.019539661  | 0.515960368  | 0.606045721 | 0.693554785 | no |
| MCM10     | -0.019531388 | -0.515741833 | 0.606198284 | 0.693665659 | no |
| SOX7      | 0.019529427  | 0.515690015  | 0.606234461 | 0.693665659 | no |
| OR5M11    | -0.019528827 | -0.515674156 | 0.606245534 | 0.693665659 | no |
| UGT1A5    | -0.019515462 | -0.515321114 | 0.606492044 | 0.693908446 | no |
| HPN       | 0.01950697   | 0.51509681   | 0.606648687 | 0.69404839  | no |
| ABCC2     | 0.019494568  | 0.514769194  | 0.60687751  | 0.694270893 | no |
| TFPT      | -0.019482983 | -0.514463156 | 0.607091297 | 0.694476171 | no |
| FAM163A   | -0.019475332 | -0.514261058 | 0.607232494 | 0.694598391 | no |
| PRDM16    | -0.019473373 | -0.514209304 | 0.607268654 | 0.694600455 | no |
| HRNR      | -0.019469965 | -0.514119283 | 0.607331554 | 0.694633102 | no |
| TMEM222   | 0.019455842  | 0.513746221  | 0.607592253 | 0.694891966 | no |
| TEKT5     | -0.019448832 | -0.513561046 | 0.607721673 | 0.695000667 | no |
| PAGE1     | 0.019441619  | 0.513370513  | 0.607854852 | 0.695113653 | no |
| SERPINB12 | 0.01943713   | 0.513251915  | 0.607937755 | 0.695169138 | no |
| NOTCH4    | 0.019427674  | 0.513002142  | 0.608112371 | 0.695329483 | no |
| LENEP     | -0.019415582 | -0.51268272  | 0.608335712 | 0.695545519 | no |
| SPAG11B   | -0.019403033 | -0.512351223 | 0.608567533 | 0.695771227 | no |
| KRTAP3-1  | -0.019390131 | -0.512010416 | 0.608805906 | 0.6960044   | no |
| ATP10B    | 0.01938404   | 0.511849518  | 0.608918459 | 0.696062377 | no |
| AQP7P1    | -0.019383209 | -0.511827566 | 0.608933816 | 0.696062377 | no |
| HTR2C     | -0.019381798 | -0.511790275 | 0.608959903 | 0.696062377 | no |
| ARHGEF37  | -0.019378283 | -0.511697424 | 0.609024862 | 0.696097273 | no |
| C14orf33  | -0.019364836 | -0.511342215 | 0.609273392 | 0.69634197  | no |
| ST8SIA6   | -0.019346541 | -0.510858958 | 0.609611588 | 0.696689112 | no |
| UGT1A6    | -0.019327408 | -0.510353555 | 0.609965371 | 0.697022224 | no |
| FAM138F   | -0.019327049 | -0.510344064 | 0.609972015 | 0.697022224 | no |
| ETFA      | 0.019321671  | 0.510202004  | 0.610071475 | 0.697096478 | no |
| TNNC2     | -0.019311005 | -0.509920244 | 0.610268762 | 0.6972825   | no |
| SLC5A7    | -0.019302908 | -0.509706362 | 0.610418541 | 0.697414221 | no |

|           |              |              |             |             |    |
|-----------|--------------|--------------|-------------|-------------|----|
| ANXA8L1   | 0.019298445  | 0.509588474  | 0.610501103 | 0.697469136 | no |
| GLYCAM1   | -0.019282416 | -0.509165064 | 0.610797677 | 0.69776853  | no |
| KRT8      | 0.019276534  | 0.509009679  | 0.610906531 | 0.697853452 | no |
| TAF4B     | -0.01927303  | -0.508917123 | 0.610971375 | 0.697888094 | no |
| OR1I1     | -0.019260247 | -0.508579458 | 0.611207965 | 0.698118899 | no |
| MRPS22    | 0.019250172  | 0.508313319  | 0.611394468 | 0.698292473 | no |
| CYP1A2    | 0.019202649  | 0.507057975  | 0.612274521 | 0.699258107 | no |
| UPK3B     | -0.019199887 | -0.506985015 | 0.612325686 | 0.699277041 | no |
| LYSMD4    | 0.019189102  | 0.50670012   | 0.612525496 | 0.699465715 | no |
| GUCY1B2   | 0.019186348  | 0.506627377  | 0.612576518 | 0.699484471 | no |
| OTOP1     | -0.019181899 | -0.506509851 | 0.612658956 | 0.699539096 | no |
| CCT6A     | 0.019171921  | 0.506246289  | 0.612843848 | 0.699710691 | no |
| ZSCAN12P1 | 0.019168279  | 0.506150087  | 0.61291134  | 0.699748234 | no |
| COL4A3BP  | -0.019159372 | -0.5059148   | 0.613076425 | 0.699897186 | no |
| GOLGA8E   | 0.01911718   | 0.504800277  | 0.613858679 | 0.70071378  | no |
| SLC45A2   | 0.019117052  | 0.504796916  | 0.613861038 | 0.70071378  | no |
| C2orf14   | 0.019109074  | 0.504586177  | 0.614009001 | 0.700843108 | no |
| TAS2R38   | -0.019076922 | -0.503736874 | 0.614605464 | 0.701484321 | no |
| SLC2A8    | 0.019071689  | 0.503598628  | 0.614702578 | 0.701555559 | no |
| NOX5      | -0.019038355 | -0.502718105 | 0.615321279 | 0.702209905 | no |
| KLRC1     | 0.019037057  | 0.502683814  | 0.615345379 | 0.702209905 | no |
| PARD6G    | 0.019025138  | 0.502368973  | 0.615566674 | 0.702422791 | no |
| GOT2      | -0.019017429 | -0.502165346 | 0.615709817 | 0.70254648  | no |
| ARL17A    | -0.019013091 | -0.502050772 | 0.615790365 | 0.702598736 | no |
| CES8      | -0.019010166 | -0.501973491 | 0.615844698 | 0.702621077 | no |
| RASGEF1A  | -0.019008074 | -0.501918227 | 0.615883553 | 0.702625758 | no |
| C21orf45  | 0.019001619  | 0.501747721  | 0.61600344  | 0.702722877 | no |
| TKT       | 0.018981482  | 0.501215796  | 0.616377513 | 0.703109939 | no |
| LCE2D     | -0.018971384 | -0.500949078 | 0.616565119 | 0.703284264 | no |
| THEM5     | 0.018967166  | 0.500837655  | 0.6166435   | 0.703289221 | no |
| UPK1A     | -0.01896652  | -0.500820576 | 0.616655515 | 0.703289221 | no |
| JMJD4     | -0.018965535 | -0.500794554 | 0.616673821 | 0.703289221 | no |
| SETMAR    | 0.018957433  | 0.500580563  | 0.616824369 | 0.703385968 | no |
| HYDIN     | 0.018957226  | 0.50057507   | 0.616828233 | 0.703385968 | no |
| CAV3      | 0.018947276  | 0.500312261  | 0.617013149 | 0.703543416 | no |
| PTEN      | -0.018946052 | -0.500279927 | 0.617035901 | 0.703543416 | no |
| SPRR2C    | -0.018942508 | -0.500186295 | 0.617101789 | 0.703578862 | no |
| PGC       | -0.018934294 | -0.499969328 | 0.617254477 | 0.703713264 | no |
| SPINK4    | -0.018915954 | -0.499484882 | 0.617595461 | 0.704062308 | no |
| KCNJ6     | 0.018911806  | 0.499375306  | 0.617672599 | 0.704110544 | no |
| PSG2      | 0.018906292  | 0.499229672  | 0.617775127 | 0.704187716 | no |
| DDX56     | 0.01889228   | 0.498859527  | 0.618035748 | 0.704445076 | no |
| OR6K6     | -0.018887709 | -0.498738787 | 0.618120772 | 0.70450227  | no |
| DEDD      | 0.018885136  | 0.498670841  | 0.618168621 | 0.70451709  | no |
| GEMIN8    | -0.018882155 | -0.498592083 | 0.618224086 | 0.70452492  | no |
| EPHA8     | -0.018881021 | -0.498562126 | 0.618245184 | 0.70452492  | no |
| LOC283922 | 0.018874923  | 0.498401044  | 0.618358634 | 0.704614488 | no |
| RABL2A    | 0.018861963  | 0.49805873   | 0.618599757 | 0.704826688 | no |
| SMC6      | 0.018859033  | 0.497981325  | 0.618654286 | 0.704826688 | no |
| GEN1      | 0.018858944  | 0.497978968  | 0.618655947 | 0.704826688 | no |
| WDR49     | 0.01885742   | 0.497938717  | 0.618684303 | 0.704826688 | no |

|           |              |              |             |             |    |
|-----------|--------------|--------------|-------------|-------------|----|
| NTRK1     | 0.018842149  | 0.497535342  | 0.618968507 | 0.705110732 | no |
| CCL25     | -0.01882691  | -0.497132801 | 0.619252179 | 0.705394138 | no |
| SLC20A2   | 0.018820075  | 0.496952267  | 0.619379421 | 0.705499331 | no |
| STAG1     | -0.018813602 | -0.496781259 | 0.619499959 | 0.705596877 | no |
| SCTR      | 0.018811492  | 0.496725535  | 0.619539239 | 0.705601867 | no |
| METTL7A   | 0.018801386  | 0.496458576  | 0.619727436 | 0.705776449 | no |
| TECRL     | -0.018790384 | -0.496167973 | 0.619932329 | 0.705970025 | no |
| CTSE      | -0.018772036 | -0.495683314 | 0.62027411  | 0.706319457 | no |
| CYP51A1   | -0.018767827 | -0.49557214  | 0.620352522 | 0.706368962 | no |
| OR6B1     | -0.018765752 | -0.495517313 | 0.620391193 | 0.706373212 | no |
| CLDN10    | 0.018757319  | 0.495294583  | 0.620548302 | 0.706512308 | no |
| PFN3      | -0.018732325 | -0.494634369 | 0.621014106 | 0.707002827 | no |
| DPF3      | 0.018728866  | 0.494543006  | 0.621078578 | 0.707036412 | no |
| C10orf12  | 0.018711709  | 0.4940898    | 0.621398433 | 0.707360707 | no |
| DCAF4     | -0.018688417 | -0.493474541 | 0.621832774 | 0.707815281 | no |
| C1orf126  | 0.018675738  | 0.493139625  | 0.622069262 | 0.708044606 | no |
| ZNF234    | 0.018666158  | 0.492886582  | 0.622247966 | 0.708208138 | no |
| BTBD6     | 0.018642671  | 0.492266197  | 0.622686186 | 0.708649688 | no |
| SMR3B     | 0.018640031  | 0.492196461  | 0.622735454 | 0.708649688 | no |
| ZNHIT2    | -0.01863973  | -0.492188507 | 0.622741073 | 0.708649688 | no |
| CRTC3     | 0.018628256  | 0.491885427  | 0.622955216 | 0.708814765 | no |
| MUC16     | 0.018628201  | 0.491883957  | 0.622956254 | 0.708814765 | no |
| PLAC1     | -0.018614921 | -0.491533181 | 0.623204138 | 0.709039994 | no |
| ROB2      | -0.018611112 | -0.491432577 | 0.623275239 | 0.709039994 | no |
| ZNF644    | -0.018610767 | -0.491423457 | 0.623281685 | 0.709039994 | no |
| TYRP1     | -0.018610081 | -0.491405353 | 0.623294481 | 0.709039994 | no |
| CD320     | 0.018594585  | 0.490996027  | 0.623583811 | 0.709321153 | no |
| CERK      | -0.018593086 | -0.490956426 | 0.623611806 | 0.709321153 | no |
| DNAH10    | -0.018558562 | -0.4900445   | 0.62425662  | 0.71000762  | no |
| OR52R1    | -0.018557013 | -0.49000358  | 0.624285561 | 0.71000762  | no |
| TAF8      | 0.018545996  | 0.489712584  | 0.624491386 | 0.710179856 | no |
| DPY19L3   | 0.018545147  | 0.489690151  | 0.624507254 | 0.710179856 | no |
| SF3B5     | 0.018543126  | 0.489636753  | 0.624545027 | 0.710182866 | no |
| OR5B17    | -0.018537586 | -0.489490415 | 0.624648549 | 0.710238355 | no |
| OR10S1    | -0.018536754 | -0.489468457 | 0.624664083 | 0.710238355 | no |
| MSH4      | 0.018521987  | 0.489078381  | 0.624940068 | 0.710512191 | no |
| RPL38     | -0.018510014 | -0.488762119 | 0.625163867 | 0.710714505 | no |
| DMRT2     | 0.018508285  | 0.488716449  | 0.625196187 | 0.710714505 | no |
| CCDC112   | -0.018506825 | -0.488677895 | 0.625223473 | 0.710714505 | no |
| SPRR3     | -0.018502851 | -0.488572919 | 0.625297768 | 0.710758997 | no |
| TSGA14    | 0.018499711  | 0.488489974  | 0.625356475 | 0.710785766 | no |
| OR5T2     | -0.018489988 | -0.488233169 | 0.625538249 | 0.710952405 | no |
| APCS      | -0.018471204 | -0.487736995 | 0.625889521 | 0.711311655 | no |
| DSCR10    | 0.018463532  | 0.487534338  | 0.626033019 | 0.711434747 | no |
| SLC25A6   | -0.018452132 | -0.487233207 | 0.626246271 | 0.71163709  | no |
| OR51S1    | -0.018440775 | -0.486933219 | 0.626458745 | 0.711809172 | no |
| XRCC6BP1  | 0.018440274  | 0.486919986  | 0.626468118 | 0.711809172 | no |
| DRG2      | 0.01842747   | 0.486581785  | 0.626707695 | 0.71204137  | no |
| TP53TG3B  | -0.018422733 | -0.486456667 | 0.626796338 | 0.712059898 | no |
| LOC285740 | -0.018422186 | -0.486442229 | 0.626806567 | 0.712059898 | no |
| MXD3      | 0.018420953  | 0.486409636  | 0.62682966  | 0.712059898 | no |

|           |              |              |             |             |    |
|-----------|--------------|--------------|-------------|-------------|----|
| C7orf50   | 0.018406599  | 0.486030503  | 0.627098302 | 0.712304808 | no |
| OR1S1     | -0.018405669 | -0.486005926 | 0.627115718 | 0.712304808 | no |
| OR5H14    | 0.018391268  | 0.485625531  | 0.627385308 | 0.712570988 | no |
| ANKRD34B  | 0.018386105  | 0.485489164  | 0.627481965 | 0.712640736 | no |
| DIAPH2    | 0.018380889  | 0.485351386  | 0.627579629 | 0.712678294 | no |
| C14orf105 | -0.018380573 | -0.485343054 | 0.627585535 | 0.712678294 | no |
| SCARNA4   | 0.018367165  | 0.484988877  | 0.627836624 | 0.712923384 | no |
| MYH1      | -0.018341189 | -0.484302757 | 0.628323161 | 0.713402108 | no |
| DEFB129   | -0.018340026 | -0.484272044 | 0.628344943 | 0.713402108 | no |
| VENTXP7   | -0.018339006 | -0.484245078 | 0.628364069 | 0.713402108 | no |
| SURF1     | -0.018331477 | -0.484046213 | 0.628505121 | 0.713522182 | no |
| LOC144742 | 0.018282154  | 0.482743395  | 0.629429527 | 0.714531509 | no |
| ANGPTL1   | -0.018276276 | -0.482588138 | 0.629539727 | 0.71458304  | no |
| DDX59     | 0.018275962  | 0.482579853  | 0.629545608 | 0.71458304  | no |
| C8B       | 0.018259129  | 0.482135213  | 0.629861258 | 0.714901191 | no |
| SCN5A     | -0.018251136 | -0.481924093 | 0.630011156 | 0.715022024 | no |
| VPS41     | -0.018249681 | -0.481885655 | 0.630038449 | 0.715022024 | no |
| TMEM183A  | 0.018244386  | 0.481745801  | 0.630137757 | 0.715076835 | no |
| TRIM64    | -0.018243335 | -0.481718024 | 0.630157482 | 0.715076835 | no |
| GPR137    | -0.018229115 | -0.481342417 | 0.630424232 | 0.715339383 | no |
| HOMER2    | 0.018225245  | 0.481240202  | 0.630496831 | 0.715374288 | no |
| SERPINA13 | -0.018223703 | -0.481199475 | 0.63052576  | 0.715374288 | no |
| FABP1     | -0.018218895 | -0.481072479 | 0.630615967 | 0.715436486 | no |
| CRX       | -0.018207795 | -0.480779296 | 0.630824241 | 0.715632618 | no |
| SLC22A20  | 0.018199401  | 0.480557566  | 0.630981775 | 0.715771168 | no |
| POLB      | 0.018195558  | 0.480456055  | 0.631053902 | 0.715812825 | no |
| LIPK      | -0.018189722 | -0.480301917 | 0.631163429 | 0.715896898 | no |
| C20orf70  | -0.01818184  | -0.48009371  | 0.631311389 | 0.716024552 | no |
| CXorf27   | 0.018159329  | 0.47949912   | 0.631734009 | 0.716429418 | no |
| MRT04     | 0.018159052  | 0.479491781  | 0.631739226 | 0.716429418 | no |
| IL22      | 0.018155677  | 0.479402641  | 0.631802595 | 0.716452424 | no |
| POU6F2    | 0.018154197  | 0.479363551  | 0.631830385 | 0.716452424 | no |
| ZBPB      | 0.018151693  | 0.47929742   | 0.6318774   | 0.716465553 | no |
| ASH2L     | 0.018145806  | 0.479141923  | 0.631987954 | 0.716550721 | no |
| SLC25A16  | -0.018132098 | -0.478779832 | 0.632245423 | 0.716802442 | no |
| HIGD1B    | 0.01812812   | 0.478674757  | 0.632320146 | 0.71682932  | no |
| IREB2     | 0.018127061  | 0.478646783  | 0.63234004  | 0.71682932  | no |
| LOC348840 | -0.018114698 | -0.478320247 | 0.63257228  | 0.717052386 | no |
| WFDC12    | 0.018083148  | 0.477486887  | 0.63316515  | 0.717666938 | no |
| LOC340094 | -0.01808207  | -0.477458399 | 0.633185421 | 0.717666938 | no |
| C2CD4A    | 0.0180675    | 0.477073557  | 0.633459289 | 0.717937098 | no |
| C19orf22  | 0.018064669  | 0.476998784  | 0.633512506 | 0.717957166 | no |
| OS9       | 0.01804678   | 0.47652626   | 0.633848853 | 0.718298083 | no |
| PRDM9     | 0.018040856  | 0.476369787  | 0.633960248 | 0.718384054 | no |
| SNORA39   | 0.018037506  | 0.47628131   | 0.63402324  | 0.718415169 | no |
| LYPD6B    | 0.018034245  | 0.476195176  | 0.634084566 | 0.718444394 | no |
| SNORA19   | -0.018032032 | -0.476136711 | 0.634126194 | 0.718451297 | no |
| TMPRSS9   | -0.018013006 | -0.475634186 | 0.634484045 | 0.718816453 | no |
| IGF2BP1   | 0.018002555  | 0.475358116  | 0.634680673 | 0.718979859 | no |
| C17orf98  | -0.018001559 | -0.475331821 | 0.634699403 | 0.718979859 | no |
| MKI67     | 0.017990125  | 0.475029796  | 0.634914549 | 0.719183279 | no |

|           |              |              |             |             |    |
|-----------|--------------|--------------|-------------|-------------|----|
| GREM1     | 0.017972432  | 0.474562481  | 0.6352475   | 0.719520109 | no |
| POMZP3    | -0.017957666 | -0.474172438 | 0.635525453 | 0.719730248 | no |
| LOC647288 | 0.017957124  | 0.47415813   | 0.63553565  | 0.719730248 | no |
| CYP2C19   | -0.017956902 | -0.474152276 | 0.635539822 | 0.719730248 | no |
| PLA2G4E   | -0.017952898 | -0.474046519 | 0.635615196 | 0.719775291 | no |
| NIPAL1    | 0.017949532  | 0.4739576    | 0.635678573 | 0.719806742 | no |
| OR56A5    | -0.01794671  | -0.473883052 | 0.635731708 | 0.719826595 | no |
| OR10T2    | 0.017924519  | 0.473296925  | 0.636149549 | 0.720227565 | no |
| KRTAP6-3  | -0.017924119 | -0.473286361 | 0.636157081 | 0.720227565 | no |
| CRTC2     | -0.017921127 | -0.473207319 | 0.636213437 | 0.720251038 | no |
| HCFC1R1   | -0.01791527  | -0.47305263  | 0.636323737 | 0.720335572 | no |
| RD3       | -0.017900709 | -0.472668008 | 0.636598023 | 0.720605723 | no |
| UBE2K     | 0.017886686  | 0.472297621  | 0.636862204 | 0.720864407 | no |
| SORL1     | -0.017867458 | -0.471789736 | 0.637224532 | 0.721234149 | no |
| PCDHGA9   | -0.01783553  | -0.470946427 | 0.637826346 | 0.721874892 | no |
| PAXIP1    | -0.017819478 | -0.470522427 | 0.638129017 | 0.722142376 | no |
| CCDC150   | 0.017819207  | 0.470515276  | 0.638134122 | 0.722142376 | no |
| CELA3A    | 0.017815913  | 0.470428256  | 0.638196249 | 0.722172226 | no |
| SLC12A1   | 0.017803738  | 0.470106677  | 0.638425858 | 0.72239165  | no |
| HGC6.3    | -0.01777675  | -0.469393828 | 0.638934958 | 0.722852761 | no |
| RPS6      | -0.017775431 | -0.469359002 | 0.638959835 | 0.722852761 | no |
| OR5T1     | -0.017774755 | -0.46934115  | 0.638972587 | 0.722852761 | no |
| BBS7      | -0.017774554 | -0.469335833 | 0.638976385 | 0.722852761 | no |
| SLK       | -0.017772119 | -0.469271517 | 0.639022327 | 0.722864288 | no |
| TBX3      | -0.017751974 | -0.468739432 | 0.639402464 | 0.723253833 | no |
| OR8I2     | -0.017740419 | -0.468434226 | 0.639620554 | 0.723460048 | no |
| UQCC      | -0.01773732  | -0.468352372 | 0.63967905  | 0.723485737 | no |
| CNKSR3    | -0.017731131 | -0.4681889   | 0.639795879 | 0.723577395 | no |
| C9orf163  | -0.017711492 | -0.46767017  | 0.640166661 | 0.723956234 | no |
| CHCHD8    | -0.017699153 | -0.467344265 | 0.64039966  | 0.724179223 | no |
| DNAJB3    | 0.017680998  | 0.466864728  | 0.64074256  | 0.724526458 | no |
| CSE1L     | 0.017676721  | 0.466751765  | 0.640823347 | 0.724555618 | no |
| SNORA21   | 0.017675839  | 0.466728449  | 0.640840022 | 0.724555618 | no |
| KRT20     | -0.017670994 | -0.46660048  | 0.640931547 | 0.724618577 | no |
| OPN1LW    | -0.017666922 | -0.466492942 | 0.641008464 | 0.724665014 | no |
| MBD3L2    | -0.017664648 | -0.466432871 | 0.641051431 | 0.724673069 | no |
| FFAR1     | 0.017658504  | 0.466270585  | 0.641167517 | 0.724763774 | no |
| C11orf64  | -0.017653032 | -0.466126041 | 0.641270919 | 0.724838709 | no |
| SPANXA2   | 0.017650294  | 0.46605373   | 0.64132265  | 0.724838709 | no |
| SNORA36B  | 0.017649304  | 0.466027575  | 0.641341362 | 0.724838709 | no |
| ASB11     | 0.017630867  | 0.465540615  | 0.641689785 | 0.725191954 | no |
| TSPYL5    | 0.017625979  | 0.465411506  | 0.641782176 | 0.725246108 | no |
| CRABP1    | 0.017624537  | 0.465373401  | 0.641809445 | 0.725246108 | no |
| OSBPL1A   | -0.017619703 | -0.46524574  | 0.641900808 | 0.72530881  | no |
| GLS       | -0.017614439 | -0.465106688 | 0.642000329 | 0.725375008 | no |
| OR2F2     | -0.017612809 | -0.465063627 | 0.642031149 | 0.725375008 | no |
| TMC05A    | -0.017598301 | -0.464680439 | 0.642305439 | 0.725641207 | no |
| OR13C8    | 0.01759655   | 0.464634194  | 0.642338544 | 0.725641207 | no |
| SPDYE1    | -0.017577942 | -0.464142689 | 0.642690448 | 0.725998182 | no |
| PAK2      | 0.017565562  | 0.463815696  | 0.642924609 | 0.726222121 | no |
| GDF3      | 0.017554699  | 0.463528783  | 0.643130099 | 0.72641365  | no |



|              |              |              |             |             |    |
|--------------|--------------|--------------|-------------|-------------|----|
| ZFP161       | -0.017550351 | -0.463413941 | 0.643212358 | 0.726435383 | no |
| ATP5G1       | -0.017549884 | -0.463401597 | 0.6432212   | 0.726435383 | no |
| FANCL        | -0.017546844 | -0.463321311 | 0.643278709 | 0.726459752 | no |
| KRTAP4-5     | -0.01753889  | -0.463111228 | 0.643429204 | 0.726589123 | no |
| CDKN2AIPNL   | -0.017531164 | -0.462907158 | 0.643575406 | 0.726713631 | no |
| C1orf177     | 0.017513455  | 0.462439392  | 0.643910579 | 0.727051496 | no |
| KRTAP19-6    | -0.017510193 | -0.462353246 | 0.643972315 | 0.727080598 | no |
| TOMM40       | -0.017503909 | -0.462187254 | 0.644091276 | 0.727174303 | no |
| MUC6         | -0.017490041 | -0.461820984 | 0.644353805 | 0.727417775 | no |
| DBNDD2       | -0.017488717 | -0.461785993 | 0.644378888 | 0.727417775 | no |
| SERHL        | 0.017486686  | 0.461732369  | 0.644417328 | 0.727420553 | no |
| MTR          | 0.017484248  | 0.461667967  | 0.644463496 | 0.727432054 | no |
| RELA         | -0.017472125 | -0.461347767 | 0.644693055 | 0.727650544 | no |
| SNW1         | 0.017464514  | 0.461146733  | 0.644837199 | 0.727772608 | no |
| SNAR-A3      | 0.017454401  | 0.460879625  | 0.64502874  | 0.727948148 | no |
| ZMAT5        | -0.017440513 | -0.460512789 | 0.645291834 | 0.728204415 | no |
| RHBDD3       | -0.017436546 | -0.460408019 | 0.645366982 | 0.728247583 | no |
| PAK1IP1      | 0.017434691  | 0.460359024  | 0.645402126 | 0.728247583 | no |
| CBWD3        | -0.017420833 | -0.459992997 | 0.645664702 | 0.728499663 | no |
| HSPA1A       | 0.017419097  | 0.45994715   | 0.645697594 | 0.728499663 | no |
| TIMM10       | 0.017409402  | 0.459691067  | 0.64588133  | 0.728666298 | no |
| CFL2         | 0.017406228  | 0.459607237  | 0.645941482 | 0.728693498 | no |
| ZNF17        | 0.017402153  | 0.459499597  | 0.646018721 | 0.728739971 | no |
| CEMP1        | -0.017382691 | -0.458985557 | 0.646387636 | 0.729115444 | no |
| C7orf27      | -0.017369517 | -0.458637594 | 0.64663741  | 0.729161434 | no |
| CLDN18       | 0.017367818  | 0.458592729  | 0.646669617 | 0.729161434 | no |
| EDA          | 0.01736777   | 0.458591444  | 0.64667054  | 0.729161434 | no |
| DEFB106A     | -0.017367225 | -0.458577065 | 0.646680862 | 0.729161434 | no |
| KRTAP19-7    | -0.017367225 | -0.458577065 | 0.646680862 | 0.729161434 | no |
| OR5M3        | -0.017367225 | -0.458577065 | 0.646680862 | 0.729161434 | no |
| OR8B4        | -0.017367225 | -0.458577065 | 0.646680862 | 0.729161434 | no |
| LOC284023    | -0.017364437 | -0.458503413 | 0.646733737 | 0.729180387 | no |
| NHLH1        | 0.017359567  | 0.458374794  | 0.646826078 | 0.729243833 | no |
| KRT13        | -0.017352406 | -0.458185644 | 0.646961887 | 0.729298873 | no |
| TTY8         | -0.017351353 | -0.45815784  | 0.646981851 | 0.729298873 | no |
| MYH16        | -0.017351287 | -0.458156081 | 0.646983114 | 0.729298873 | no |
| NXPH4        | 0.017337818  | 0.457800331  | 0.647238575 | 0.729546162 | no |
| DKFZp686A162 | -0.01732062  | -0.457346091 | 0.647564822 | 0.729873206 | no |
| CCDC144NL    | -0.017316141 | -0.457227788 | 0.647649801 | 0.729928295 | no |
| TRIM60       | -0.017303863 | -0.456903496 | 0.647882771 | 0.73015016  | no |
| SNORA53      | 0.017300854  | 0.456824028  | 0.647939865 | 0.730173803 | no |
| VN1R4        | -0.017266683 | -0.455921477 | 0.648588457 | 0.730863974 | no |
| DLX1         | -0.017256648 | -0.455656429 | 0.648778977 | 0.731037918 | no |
| MBTPS1       | -0.017241911 | -0.455267195 | 0.649058804 | 0.731312467 | no |
| FAM136B      | -0.017219988 | -0.454688154 | 0.64947518  | 0.731728163 | no |
| C3orf35      | 0.017216841  | 0.454605015  | 0.649534972 | 0.731728163 | no |
| C16orf91     | -0.01721677  | -0.454603139 | 0.649536322 | 0.731728163 | no |
| DCST2        | -0.017209989 | -0.454424042 | 0.649665134 | 0.731832498 | no |
| CREB5        | 0.017207055  | 0.454346549  | 0.649720872 | 0.73185451  | no |
| PDE6H        | -0.017203552 | -0.454254039 | 0.649787415 | 0.731888688 | no |
| SNORD94      | 0.017181255  | 0.453665102  | 0.650211103 | 0.732325111 | no |

|            |              |              |             |             |    |
|------------|--------------|--------------|-------------|-------------|----|
| OR8B8      | -0.01717808  | -0.453581249 | 0.650271437 | 0.732352267 | no |
| NUDT1      | 0.017175364  | 0.453509513  | 0.650323054 | 0.732369604 | no |
| TMIGD1     | -0.017156875 | -0.453021176 | 0.65067448  | 0.732687137 | no |
| PRAMEF14   | 0.01715529   | 0.452979316  | 0.650704607 | 0.732687137 | no |
| FAM98C     | -0.017153283 | -0.452926314 | 0.650742755 | 0.732687137 | no |
| OR1S2      | 0.017152904  | 0.452916288  | 0.650749971 | 0.732687137 | no |
| MUC13      | 0.01713618   | 0.452474573  | 0.651067928 | 0.732996109 | no |
| FAM134C    | -0.017134656 | -0.452434329 | 0.6510969   | 0.732996109 | no |
| C3orf32    | -0.017123042 | -0.452127564 | 0.651317759 | 0.733203922 | no |
| WDR91      | 0.017104329  | 0.451633301  | 0.651673672 | 0.733563738 | no |
| C21orf129  | -0.0170945   | -0.451373711 | 0.651860632 | 0.733701794 | no |
| NUDT9P1    | -0.017094066 | -0.451362238 | 0.651868896 | 0.733701794 | no |
| UBE2S      | 0.017073196  | 0.450811005  | 0.652265975 | 0.734107854 | no |
| PNOC       | -0.017067877 | -0.450670529 | 0.652367183 | 0.734180891 | no |
| PDAP1      | -0.017048237 | -0.4501518   | 0.652740962 | 0.734523615 | no |
| SNORA74A   | 0.017048058  | 0.450147063  | 0.652744375 | 0.734523615 | no |
| DNAJC17    | -0.017034452 | -0.44978771  | 0.653003365 | 0.734748063 | no |
| EME1       | 0.017033388  | 0.449759599  | 0.653023627 | 0.734748063 | no |
| NROB2      | 0.017031853  | 0.449719044  | 0.653052859 | 0.734748063 | no |
| FGB        | -0.017024759 | -0.449531681 | 0.653187915 | 0.734834334 | no |
| ABO        | -0.017024007 | -0.449511824 | 0.653202229 | 0.734834334 | no |
| LOC653545  | -0.017019695 | -0.449397942 | 0.653284323 | 0.734885798 | no |
| MUC2       | -0.017017334 | -0.449335568 | 0.65332929  | 0.734895492 | no |
| NCRNA00185 | -0.017013702 | -0.449239652 | 0.653398438 | 0.734932385 | no |
| OR6N2      | -0.017006333 | -0.449045022 | 0.653538762 | 0.735049327 | no |
| PRDM2      | -0.016999552 | -0.448865917 | 0.653667904 | 0.735153679 | no |
| KRTAP24-1  | -0.016996396 | -0.448782554 | 0.653728016 | 0.735180389 | no |
| KRT26      | -0.016970172 | -0.448089912 | 0.654227555 | 0.735701247 | no |
| GOLGA5     | -0.016953331 | -0.447645127 | 0.65454842  | 0.736007804 | no |
| PRPF31     | 0.016950395  | 0.447567566  | 0.654604378 | 0.736007804 | no |
| MUCL1      | 0.016950133  | 0.447560641  | 0.654609374 | 0.736007804 | no |
| ESC01      | -0.016943905 | -0.447396145 | 0.654728061 | 0.736100314 | no |
| TPRX1      | -0.016933696 | -0.447126525 | 0.654922616 | 0.736278106 | no |
| IRX4       | 0.01692879   | 0.446996944  | 0.655016128 | 0.736288222 | no |
| NR4A1      | 0.016928543  | 0.446990415  | 0.65502084  | 0.736288222 | no |
| NKX2-1     | 0.016925571  | 0.446911904  | 0.655077501 | 0.736288222 | no |
| KRTAP12-1  | -0.016923187 | -0.446848949 | 0.655122936 | 0.736288222 | no |
| UBE3B      | -0.016922386 | -0.446827793 | 0.655138205 | 0.736288222 | no |
| C1orf93    | -0.016921761 | -0.446811284 | 0.65515012  | 0.736288222 | no |
| UIMC1      | -0.01690676  | -0.446415089 | 0.655436093 | 0.736568669 | no |
| PRICKLE1   | -0.016889704 | -0.445964587 | 0.655761325 | 0.736810949 | no |
| LOC644936  | -0.016888714 | -0.445938443 | 0.655780201 | 0.736810949 | no |
| STK17B     | -0.016888614 | -0.445935797 | 0.655782112 | 0.736810949 | no |
| LOC728410  | 0.016886228  | 0.445872786  | 0.655827608 | 0.736810949 | no |
| QRSL1      | -0.016885898 | -0.445864068 | 0.655833902 | 0.736810949 | no |
| FHIT       | -0.016883307 | -0.445795638 | 0.655883312 | 0.736825516 | no |
| RRP7A      | 0.016875707  | 0.445594896  | 0.656028267 | 0.736947411 | no |
| MANBAL     | -0.016867353 | -0.445374249 | 0.656187609 | 0.737085454 | no |
| THOC3      | -0.016864782 | -0.445306361 | 0.656236639 | 0.737099576 | no |
| PIGS       | -0.016850229 | -0.444921971 | 0.656514276 | 0.737370459 | no |
| MYO1H      | -0.016829199 | -0.444366539 | 0.656915538 | 0.737716226 | no |

|           |              |              |             |             |    |
|-----------|--------------|--------------|-------------|-------------|----|
| TMPRSS2   | 0.016828396  | 0.444345338  | 0.656930857 | 0.737716226 | no |
| TAF7      | -0.016828358 | -0.444344432 | 0.656931592 | 0.737716226 | no |
| LOC121838 | 0.016782342  | 0.443128957  | 0.657809963 | 0.738661585 | no |
| LOC283914 | -0.016775626 | -0.442951571 | 0.657938204 | 0.738764556 | no |
| IL26      | 0.016772614  | 0.442872024  | 0.657995715 | 0.738784263 | no |
| CYP2A7    | -0.01677088  | -0.442826214 | 0.658028836 | 0.738784263 | no |
| DDTL      | 0.01675271   | 0.442346313  | 0.658375849 | 0.739132818 | no |
| KATNAL1   | 0.016746541  | 0.44218337   | 0.658493689 | 0.739224065 | no |
| NBPF16    | -0.016731795 | -0.441793915 | 0.658775376 | 0.739499225 | no |
| HPVC1     | -0.016729757 | -0.441740078 | 0.658814319 | 0.739501882 | no |
| ARSG      | -0.016720985 | -0.44150839  | 0.658981922 | 0.739648948 | no |
| RPL31     | -0.016711793 | -0.441265631 | 0.659157552 | 0.739805007 | no |
| TTC31     | 0.016708074  | 0.441167393  | 0.65922863  | 0.739830791 | no |
| TTY15     | -0.016706762 | -0.44113273  | 0.659253711 | 0.739830791 | no |
| ARHGAP22  | 0.016700317  | 0.440962526  | 0.659376868 | 0.73992793  | no |
| NUP107    | 0.016688981  | 0.440663103  | 0.659593549 | 0.740034615 | no |
| RBMY1B    | -0.016687561 | -0.440625604 | 0.659620687 | 0.740034615 | no |
| OR2G3     | -0.016687169 | -0.440615244 | 0.659628185 | 0.740034615 | no |
| ARL16     | -0.016686278 | -0.440591723 | 0.659645207 | 0.740034615 | no |
| HIST1H2BB | 0.016685768  | 0.440578259  | 0.659654952 | 0.740034615 | no |
| C1orf223  | 0.016681852  | 0.440474823  | 0.659729814 | 0.740077533 | no |
| BLOC1S2   | -0.016679105 | -0.440402276 | 0.659782322 | 0.740095372 | no |
| PASD1     | 0.01667074   | 0.440181326  | 0.659942251 | 0.7402337   | no |
| FAM41C    | 0.0166566    | 0.439807862  | 0.66021261  | 0.74049587  | no |
| ALKBH7    | -0.016648344 | -0.439589813 | 0.66037048  | 0.740605327 | no |
| MED4      | 0.016647665  | 0.439571885  | 0.660383462 | 0.740605327 | no |
| OR2T29    | -0.016620333 | -0.43884999  | 0.660906236 | 0.741150496 | no |
| FBX09     | -0.016612444 | -0.438641649 | 0.661057142 | 0.74126914  | no |
| LOC440173 | -0.016610969 | -0.438602689 | 0.661085362 | 0.74126914  | no |
| SPAG5     | 0.016607291  | 0.438505532  | 0.661155741 | 0.741306942 | no |
| OPTN      | 0.016596191  | 0.438212361  | 0.661368127 | 0.741503953 | no |
| KRTAP6-1  | -0.016593316 | -0.438136427 | 0.661423141 | 0.741524512 | no |
| WDR52     | -0.016576311 | -0.437687307 | 0.661748566 | 0.741848212 | no |
| PJA2      | -0.016570965 | -0.437546099 | 0.661850896 | 0.741919256 | no |
| SLC6A11   | -0.016569166 | -0.437498584 | 0.661885331 | 0.741919256 | no |
| ZNF256    | -0.01656054  | -0.437270773 | 0.662050437 | 0.742063185 | no |
| RBMY1A1   | -0.016553413 | -0.437082541 | 0.662186871 | 0.742170782 | no |
| OR6P1     | -0.016551691 | -0.437037045 | 0.662219849 | 0.742170782 | no |
| GFRA3     | 0.01651701   | 0.436121083  | 0.662883927 | 0.742873856 | no |
| OSTN      | -0.016497681 | -0.435610549 | 0.663254183 | 0.743247593 | no |
| PIP4K2C   | 0.0164946    | 0.435529184  | 0.663313199 | 0.74327253  | no |
| HNF1B     | -0.016487945 | -0.435353414 | 0.663440697 | 0.743374197 | no |
| PEBP4     | -0.016481042 | -0.43517109  | 0.663572959 | 0.743481191 | no |
| FAM55A    | -0.016440992 | -0.434113324 | 0.664340495 | 0.744299907 | no |
| SFTA3     | 0.016416878  | 0.433476442  | 0.664802799 | 0.744776583 | no |
| MAPK1IP1L | 0.016404948  | 0.433161355  | 0.665031563 | 0.744991586 | no |
| IQCF1     | 0.01638974   | 0.432759681  | 0.665323239 | 0.745277037 | no |
| TMEM9     | -0.016377248 | -0.432429745 | 0.66556286  | 0.745504149 | no |
| NPC1L1    | -0.016371826 | -0.432286539 | 0.665666876 | 0.745579353 | no |
| C7orf26   | -0.016357428 | -0.431906273 | 0.665943109 | 0.745847429 | no |
| C2orf53   | 0.016348902  | 0.431681082  | 0.666106715 | 0.74598934  | no |

|              |              |              |             |             |    |
|--------------|--------------|--------------|-------------|-------------|----|
| TBX1         | 0.016345522  | 0.431591813  | 0.666171574 | 0.746020654 | no |
| BPIL1        | 0.016342731  | 0.431518097  | 0.666225136 | 0.746039313 | no |
| C21orf94     | -0.01633163  | -0.431224915 | 0.666438176 | 0.746236544 | no |
| GATA1        | -0.01632221  | -0.430976109 | 0.666618991 | 0.746397672 | no |
| OR51B2       | 0.01630624   | 0.430554335  | 0.666925553 | 0.74669957  | no |
| LGALS7B      | 0.016298302  | 0.430344669  | 0.667077968 | 0.746828858 | no |
| MAGEB4       | -0.0162798   | -0.429856009 | 0.667433247 | 0.747185237 | no |
| OR13D1       | -0.016276679 | -0.429773594 | 0.667493174 | 0.747210951 | no |
| CRISP2       | -0.016262918 | -0.429410139 | 0.66775748  | 0.747465438 | no |
| ASPHD2       | -0.016239228 | -0.428784467 | 0.66821257  | 0.747832451 | no |
| MZF1         | -0.016238977 | -0.428777836 | 0.668217394 | 0.747832451 | no |
| HSPC159      | -0.016238313 | -0.42876029  | 0.668230158 | 0.747832451 | no |
| LOC100192426 | -0.016238149 | -0.428755957 | 0.66823331  | 0.747832451 | no |
| FLJ43950     | -0.016229619 | -0.428530669 | 0.668397208 | 0.74797447  | no |
| TFDP2        | 0.016190295  | 0.42749208   | 0.669152989 | 0.748778787 | no |
| ANKRD9       | 0.016179463  | 0.427205988  | 0.669361238 | 0.748970364 | no |
| MYOG         | 0.016169431  | 0.426941044  | 0.669554114 | 0.74914472  | no |
| EIF3IP1      | 0.016136659  | 0.426075488  | 0.670184385 | 0.749808417 | no |
| ZNF735       | -0.016134055 | -0.426006727 | 0.670234464 | 0.749822952 | no |
| PLCXD3       | 0.016128128  | 0.425850173  | 0.67034849  | 0.749909023 | no |
| PAGE5        | 0.016123687  | 0.425732892  | 0.670433916 | 0.749929109 | no |
| IQCF5        | -0.016123338 | -0.425723676 | 0.67044063  | 0.749929109 | no |
| RP1          | 0.016120627  | 0.425652066  | 0.670492792 | 0.749945965 | no |
| TEX13B       | 0.016113693  | 0.425468947  | 0.670626187 | 0.750053673 | no |
| CCL3L3       | 0.016110922  | 0.425395768  | 0.670679498 | 0.750071805 | no |
| GBX1         | -0.016107107 | -0.42529501  | 0.670752903 | 0.750083736 | no |
| NR5A1        | -0.016106512 | -0.425279277 | 0.670764366 | 0.750083736 | no |
| VCY          | -0.016099664 | -0.425098424 | 0.670896131 | 0.75018959  | no |
| P2RX6P       | 0.016078415  | 0.424537225  | 0.671305073 | 0.750605351 | no |
| TRIM68       | -0.016042423 | -0.423586626 | 0.67199799  | 0.75133857  | no |
| GRK1         | -0.016034469 | -0.423376571 | 0.672151143 | 0.75141169  | no |
| HYAL4        | 0.016033762  | 0.423357884  | 0.672164768 | 0.75141169  | no |
| OR4K1        | -0.016033237 | -0.423344009 | 0.672174885 | 0.75141169  | no |
| GUCY2F       | -0.016025378 | -0.423136447 | 0.672326236 | 0.751539328 | no |
| FAM47A       | -0.016010027 | -0.422731034 | 0.672621893 | 0.751828253 | no |
| EML2         | -0.016007323 | -0.42265962  | 0.672673979 | 0.751844906 | no |
| LEMD2        | -0.015999165 | -0.422444134 | 0.672831153 | 0.751979008 | no |
| SYNJ2BP      | -0.015994157 | -0.422311885 | 0.672927621 | 0.752045252 | no |
| LOC440356    | -0.015989329 | -0.422184357 | 0.673020652 | 0.752081612 | no |
| POU4F1       | -0.015988607 | -0.422165301 | 0.673034554 | 0.752081612 | no |
| PARP3        | 0.015981174  | 0.421968985  | 0.673177774 | 0.752162799 | no |
| FGA          | -0.015980302 | -0.421945951 | 0.67319458  | 0.752162799 | no |
| OR51A2       | -0.015979044 | -0.421912732 | 0.673218816 | 0.752162799 | no |
| ECEL1        | 0.015967078  | 0.42159669   | 0.673449412 | 0.752358688 | no |
| ARFGEF2      | -0.015966084 | -0.421570436 | 0.673468569 | 0.752358688 | no |
| ZNF395       | 0.015958632  | 0.421373648  | 0.673612171 | 0.752477533 | no |
| ADK          | -0.015946335 | -0.421048852 | 0.673849209 | 0.752673847 | no |
| BAGE         | -0.015945652 | -0.421030827 | 0.673862365 | 0.752673847 | no |
| FOXI3        | 0.01593257   | 0.420685326  | 0.674114552 | 0.752813971 | no |
| C16orf11     | -0.015931976 | -0.420669625 | 0.674126013 | 0.752813971 | no |
| OR4K14       | -0.01593156  | -0.42065863  | 0.674134039 | 0.752813971 | no |

|          |              |              |             |             |    |
|----------|--------------|--------------|-------------|-------------|----|
| LPAR3    | 0.015931419  | 0.420654907  | 0.674136757 | 0.752813971 | no |
| CYLC2    | 0.015923126  | 0.420435906  | 0.674296663 | 0.752950915 | no |
| C9orf70  | 0.015917115  | 0.420277144  | 0.674412537 | 0.753038751 | no |
| URB2     | 0.015912311  | 0.420150261  | 0.674505176 | 0.753052801 | no |
| OR7G3    | -0.015911555 | -0.420130291 | 0.674519757 | 0.753052801 | no |
| EFCAB7   | -0.015910443 | -0.420100925 | 0.674541198 | 0.753052801 | no |
| HMGA2    | 0.015908737  | 0.420055856  | 0.674574106 | 0.753052801 | no |
| SCUBE1   | -0.015899741 | -0.41981828  | 0.674747584 | 0.753204872 | no |
| CLPTM1   | -0.015896639 | -0.419736341 | 0.674807419 | 0.753230078 | no |
| OTOP2    | -0.015883379 | -0.419386149 | 0.675063169 | 0.75346979  | no |
| ATP12A   | 0.015881641  | 0.419340228  | 0.675096708 | 0.75346979  | no |
| FAM127C  | -0.015874332 | -0.419147212 | 0.67523769  | 0.753585538 | no |
| TMEM91   | 0.015864374  | 0.418884218  | 0.675429802 | 0.753749418 | no |
| CD01     | 0.015862856  | 0.418844122  | 0.675459093 | 0.753749418 | no |
| GC       | -0.015857631 | -0.418706133 | 0.675559902 | 0.753820304 | no |
| PEG3AS   | -0.015840512 | -0.418253989 | 0.675890259 | 0.75414731  | no |
| SLC5A1   | -0.015836019 | -0.418135321 | 0.675976973 | 0.754202441 | no |
| ZNF628   | -0.015824944 | -0.417842823 | 0.676190729 | 0.754394149 | no |
| SLC2A6   | -0.01582325  | -0.417798089 | 0.676223423 | 0.754394149 | no |
| ZNF114   | 0.015805046  | 0.417317318  | 0.676574831 | 0.754744534 | no |
| CCNT1    | 0.015786673  | 0.416832065  | 0.676929588 | 0.755098616 | no |
| ZNF107   | 0.015777969  | 0.416602193  | 0.677097666 | 0.755244434 | no |
| TRIM77   | -0.015775111 | -0.416526712 | 0.67715286  | 0.755264331 | no |
| ATPIF1   | -0.015769997 | -0.416391654 | 0.677251623 | 0.755332818 | no |
| ZNF252   | -0.015763991 | -0.416233033 | 0.677367624 | 0.755420521 | no |
| FTHL3    | -0.01576158  | -0.416169347 | 0.6774142   | 0.755430794 | no |
| AASDH    | -0.015758372 | -0.416084616 | 0.677476169 | 0.755439274 | no |
| ATXN3L   | -0.015757317 | -0.416056773 | 0.677496533 | 0.755439274 | no |
| CT45A2   | -0.015751384 | -0.415900067 | 0.677611149 | 0.755525408 | no |
| SLC45A3  | 0.015744548  | 0.41571953   | 0.677743205 | 0.755630976 | no |
| MSX2     | -0.015733757 | -0.415434538 | 0.677951686 | 0.755792235 | no |
| CNTD2    | 0.015732686  | 0.415406244  | 0.677972385 | 0.755792235 | no |
| FGFR2    | -0.015731257 | -0.415368512 | 0.677999989 | 0.755792235 | no |
| CSN1S2A  | -0.015728931 | -0.415307068 | 0.678044941 | 0.755800674 | no |
| OR5M1    | -0.015725225 | -0.415209191 | 0.678116552 | 0.755838825 | no |
| CXorf51  | -0.015721165 | -0.415101966 | 0.678195003 | 0.755884596 | no |
| EDIL3    | 0.015716722  | 0.41498463   | 0.678280857 | 0.755931234 | no |
| PRSS33   | 0.01571513   | 0.414942581  | 0.678311626 | 0.755931234 | no |
| ZBTB48   | 0.015709424  | 0.41479188   | 0.678421901 | 0.756009416 | no |
| MSH5     | -0.01570763  | -0.414744509 | 0.678456565 | 0.756009416 | no |
| SNORA71C | 0.015704763  | 0.41466879   | 0.678511977 | 0.756029493 | no |
| HYLS1    | 0.015689934  | 0.414277131  | 0.678798619 | 0.756307201 | no |
| PRAMEF18 | -0.015668877 | -0.413721012 | 0.679205704 | 0.756719067 | no |
| C10orf76 | 0.015666436  | 0.413656556  | 0.679252892 | 0.756729942 | no |
| CGB      | -0.015656634 | -0.413397664 | 0.679442441 | 0.756867318 | no |
| TRIM35   | -0.015656187 | -0.413385873 | 0.679451075 | 0.756867318 | no |
| CKAP2    | 0.015636787  | 0.412873514  | 0.679826262 | 0.757243532 | no |
| OR8B12   | -0.015633415 | -0.412784448 | 0.679891491 | 0.757274469 | no |
| PRSS8    | -0.015629607 | -0.412683876 | 0.679965149 | 0.75731479  | no |
| SLC5A11  | -0.015615366 | -0.412307757 | 0.680240644 | 0.757496395 | no |
| SP9      | -0.015614795 | -0.412292676 | 0.680251691 | 0.757496395 | no |

|           |              |              |             |             |    |
|-----------|--------------|--------------|-------------|-------------|----|
| RNU11     | -0.015613817 | -0.412266853 | 0.680270607 | 0.757496395 | no |
| TUBB8     | -0.015613431 | -0.412256663 | 0.680278072 | 0.757496395 | no |
| EBF3      | 0.015610717  | 0.412184987  | 0.680330577 | 0.757513141 | no |
| CDCA3     | 0.015604008  | 0.412007805  | 0.680460379 | 0.757615945 | no |
| LOC646813 | -0.015601607 | -0.411944395 | 0.680506835 | 0.757625946 | no |
| EVPLL     | -0.015596021 | -0.411796862 | 0.680614925 | 0.757704563 | no |
| EPPK1     | 0.015581329  | 0.41140884   | 0.680899243 | 0.757963854 | no |
| USF2      | 0.015580111  | 0.411376673  | 0.680922815 | 0.757963854 | no |
| XAGE2     | -0.015574411 | -0.411226123 | 0.681033142 | 0.758044927 | no |
| OR10X1    | -0.015561423 | -0.410883106 | 0.68128454  | 0.758283007 | no |
| KIAA0368  | 0.015555044  | 0.410714644  | 0.681408019 | 0.758349479 | no |
| SOCS4     | 0.015554463  | 0.410699282  | 0.681419279 | 0.758349479 | no |
| SI        | 0.015520302  | 0.40979708   | 0.682080724 | 0.759043817 | no |
| CNOT3     | 0.015505091  | 0.409395363  | 0.682375319 | 0.759291222 | no |
| RAD1      | 0.015504945  | 0.409391499  | 0.682378153 | 0.759291222 | no |
| MTAP      | -0.015496812 | -0.409176718 | 0.682535681 | 0.759424709 | no |
| DNAJC19   | 0.01548187   | 0.408782101  | 0.682825142 | 0.759693705 | no |
| RPS2      | -0.015480454 | -0.408744683 | 0.682852592 | 0.759693705 | no |
| SCN4B     | -0.015475594 | -0.408616337 | 0.682946749 | 0.759756651 | no |
| LDLRAD3   | -0.015473616 | -0.408564108 | 0.682985066 | 0.759757473 | no |
| SMYD3     | 0.015468155  | 0.408419874  | 0.683090887 | 0.75983052  | no |
| NRCAM     | 0.015466348  | 0.408372158  | 0.683125896 | 0.75983052  | no |
| ING2      | 0.015459936  | 0.408202807  | 0.683250155 | 0.759926924 | no |
| OR4L1     | -0.015453967 | -0.408045171 | 0.683365825 | 0.760013766 | no |
| SLC22A8   | -0.015440064 | -0.407677975 | 0.683635296 | 0.76027164  | no |
| OR5L2     | -0.015421144 | -0.407178315 | 0.684002042 | 0.760637659 | no |
| ONECUT1   | 0.015389813  | 0.406350834  | 0.68460957  | 0.761271383 | no |
| OR8H3     | -0.015381085 | -0.40612034  | 0.684778833 | 0.761398871 | no |
| ANAPC11   | 0.015380017  | 0.406092146  | 0.684799539 | 0.761398871 | no |
| ZMAT3     | -0.015359489 | -0.405549974 | 0.685197749 | 0.761799729 | no |
| NUDT16L1  | 0.015355245  | 0.405437902  | 0.685280073 | 0.761804752 | no |
| UCA1      | -0.015354359 | -0.405414492 | 0.68529727  | 0.761804752 | no |
| ESYT3     | -0.015353429 | -0.405389942 | 0.685315305 | 0.761804752 | no |
| MLANA     | -0.015350454 | -0.405311383 | 0.685373014 | 0.7618101   | no |
| DPH3B     | -0.015349297 | -0.405280809 | 0.685395475 | 0.7618101   | no |
| CA6       | 0.015338786  | 0.405003225  | 0.685599409 | 0.761945318 | no |
| ZNF117    | -0.015338659 | -0.404999855 | 0.685601885 | 0.761945318 | no |
| HYMAI     | -0.0153372   | -0.404961331 | 0.68563019  | 0.761945318 | no |
| NOS2      | 0.015326883  | 0.404688869  | 0.685830386 | 0.762026425 | no |
| CASP14    | 0.015326619  | 0.404681897  | 0.685835509 | 0.762026425 | no |
| FLJ25758  | -0.015325993 | -0.404665352 | 0.685847667 | 0.762026425 | no |
| ID2       | 0.01532567   | 0.404656822  | 0.685853935 | 0.762026425 | no |
| MT3       | 0.015321832  | 0.404555472  | 0.68592841  | 0.762030985 | no |
| LOC728190 | -0.015320013 | -0.404507414 | 0.685963726 | 0.762030985 | no |
| DNAH14    | 0.015319632  | 0.404497364  | 0.685971111 | 0.762030985 | no |
| OR8J3     | -0.015316424 | -0.404412633 | 0.686033378 | 0.762050475 | no |
| SYF2      | 0.015311343  | 0.404278456  | 0.686131987 | 0.762050475 | no |
| MAGEA4    | -0.015311015 | -0.404269778 | 0.686138364 | 0.762050475 | no |
| MAGEB16   | 0.01531096   | 0.404268337  | 0.686139423 | 0.762050475 | no |
| SLC13A2   | -0.015306831 | -0.404159294 | 0.686219564 | 0.762097619 | no |
| SNORA9    | 0.015299588  | 0.403967995  | 0.686360168 | 0.762211901 | no |

|              |              |              |             |             |    |
|--------------|--------------|--------------|-------------|-------------|----|
| NUTF2        | 0.015297139  | 0.403903316  | 0.686407709 | 0.762216157 | no |
| ZNF420       | 0.015295506  | 0.403860202  | 0.6864394   | 0.762216157 | no |
| C19orf18     | 0.015288181  | 0.403666741  | 0.686581611 | 0.762332199 | no |
| ATXN1        | -0.015282445 | -0.403515262 | 0.686692968 | 0.762413972 | no |
| TMEM189-UBE2 | 0.015245271  | 0.402533472  | 0.687414882 | 0.763173581 | no |
| NBPF1        | 0.015235936  | 0.402286959  | 0.687596189 | 0.763332953 | no |
| RORB         | 0.015228937  | 0.402102096  | 0.687732165 | 0.763414808 | no |
| TAT          | -0.015228253 | -0.402084048 | 0.687745441 | 0.763414808 | no |
| FRG1         | -0.01522408  | -0.40197384  | 0.68782651  | 0.763462881 | no |
| WFS1         | 0.01519984   | 0.401333665  | 0.688297493 | 0.763943715 | no |
| METTL2B      | -0.015185707 | -0.400960408 | 0.688572157 | 0.764206613 | no |
| PADI4        | 0.015170636  | 0.400562388  | 0.68886509  | 0.764489757 | no |
| HCG4         | 0.015163853  | 0.400383238  | 0.688996955 | 0.764594129 | no |
| OR14C36      | 0.015153242  | 0.400103013  | 0.689203236 | 0.764781066 | no |
| CSN1S1       | 0.015148059  | 0.399966126  | 0.689304011 | 0.764850913 | no |
| BLID         | 0.015137497  | 0.39968719   | 0.689509377 | 0.7650368   | no |
| APP          | -0.015125333 | -0.399365933 | 0.68974593  | 0.765257269 | no |
| PALB2        | -0.015118326 | -0.399180893 | 0.689882196 | 0.765332569 | no |
| ZCCHC7       | -0.015117951 | -0.399170965 | 0.689889507 | 0.765332569 | no |
| NBPF4        | 0.015108008  | 0.398908389  | 0.69008289  | 0.765505095 | no |
| EBF1         | -0.015100291 | -0.39870459  | 0.690232998 | 0.765629602 | no |
| VPS33A       | 0.015098191  | 0.398649125  | 0.690273853 | 0.765632915 | no |
| IFNA6        | -0.015089816 | -0.398427951 | 0.690436776 | 0.765771614 | no |
| HIST1H2BF    | 0.015082241  | 0.398227879  | 0.690584167 | 0.765893072 | no |
| MUC17        | -0.015076793 | -0.398083992 | 0.690690175 | 0.765968622 | no |
| C2orf67      | -0.015064929 | -0.397770687 | 0.690921021 | 0.766163012 | no |
| C1orf227     | 0.015063757  | 0.397739728  | 0.690943833 | 0.766163012 | no |
| ITGB6        | -0.015061942 | -0.397691805 | 0.690979146 | 0.766163012 | no |
| CHMP4B       | 0.01505031   | 0.397384583  | 0.691205545 | 0.766372016 | no |
| MYLK3        | 0.015039415  | 0.397096867  | 0.691417594 | 0.766541753 | no |
| CYP2B6       | -0.015038549 | -0.397073981 | 0.691434462 | 0.766541753 | no |
| GLTP         | -0.015029728 | -0.39684104  | 0.691606162 | 0.766690063 | no |
| TTLL3        | 0.015016393  | 0.396488852  | 0.691865787 | 0.766935823 | no |
| OR2AG1       | -0.015000215 | -0.396061604 | 0.692180793 | 0.767242943 | no |
| CENPC1       | -0.01498712  | -0.39571577  | 0.692435813 | 0.767452507 | no |
| PCDHGB3      | 0.014986609  | 0.395702265  | 0.692445773 | 0.767452507 | no |
| CORO2B       | 0.014982253  | 0.395587222  | 0.692530614 | 0.767504465 | no |
| BLM          | 0.014977059  | 0.395450068  | 0.692631767 | 0.767555573 | no |
| OR51T1       | -0.014975854 | -0.395418237 | 0.692655244 | 0.767555573 | no |
| NUP93        | 0.014974038  | 0.39537027   | 0.692690622 | 0.767555573 | no |
| NDUFB7       | 0.014971861  | 0.395312774  | 0.692733029 | 0.767560496 | no |
| ABCC6P2      | -0.014965167 | -0.395135984 | 0.692863429 | 0.767586807 | no |
| KRTAP4-4     | -0.014964425 | -0.395116388 | 0.692877883 | 0.767586807 | no |
| TMEM72       | -0.014960336 | -0.395008407 | 0.692957535 | 0.767586807 | no |
| LCN9         | -0.014959823 | -0.39499485  | 0.692967536 | 0.767586807 | no |
| MS4A13       | -0.014958948 | -0.394971762 | 0.692984567 | 0.767586807 | no |
| S100A7L2     | -0.014958948 | -0.394971762 | 0.692984567 | 0.767586807 | no |
| C13orf35     | -0.014950227 | -0.394741444 | 0.693154474 | 0.767732944 | no |
| MYLK4        | -0.014946472 | -0.394642272 | 0.693227639 | 0.76777192  | no |
| KRTAP20-1    | -0.014942298 | -0.394532043 | 0.693308965 | 0.76781993  | no |
| MRPL55       | 0.014936835  | 0.394387748  | 0.693415428 | 0.767895773 | no |

|           |              |              |             |             |    |
|-----------|--------------|--------------|-------------|-------------|----|
| OBP2B     | -0.014928053 | -0.394155835 | 0.693586552 | 0.768043209 | no |
| LCE1B     | -0.014919821 | -0.39393842  | 0.693746992 | 0.768178798 | no |
| OCIAD1    | 0.014912817  | 0.393753446  | 0.693883503 | 0.768287878 | no |
| HTR3E     | -0.014908139 | -0.393629907 | 0.69397468  | 0.768346754 | no |
| DMRT1     | 0.014895845  | 0.393305235  | 0.694214324 | 0.768569992 | no |
| DAZ2      | -0.014887673 | -0.393089417 | 0.694373638 | 0.768704278 | no |
| C3orf17   | 0.014883482  | 0.392978723  | 0.694455357 | 0.768721512 | no |
| NPR3      | 0.014882974  | 0.392965323  | 0.694465249 | 0.768721512 | no |
| RALGPS2   | -0.014878573 | -0.392849074 | 0.694551073 | 0.768774423 | no |
| NSD1      | -0.014858694 | -0.392324076 | 0.694938714 | 0.769115011 | no |
| UHRF1BP1  | -0.014858593 | -0.392321433 | 0.694940666 | 0.769115011 | no |
| RPS26P11  | 0.01485694   | 0.392277779  | 0.694972903 | 0.769115011 | no |
| LOC284233 | -0.014850978 | -0.392120318 | 0.695089184 | 0.769176962 | no |
| TMEM47    | -0.014850169 | -0.392098943 | 0.69510497  | 0.769176962 | no |
| MRGPRG    | 0.014845599  | 0.391978248  | 0.695194106 | 0.769233496 | no |
| FILIP1    | 0.014838665  | 0.391795124  | 0.695329356 | 0.769341045 | no |
| SLC25A3   | -0.014832156 | -0.391623233 | 0.695456319 | 0.769405421 | no |
| AGRN      | 0.01483178   | 0.391613307  | 0.69546365  | 0.769405421 | no |
| ARL2      | 0.014828468  | 0.391525826  | 0.695528269 | 0.769434808 | no |
| RNF151    | 0.014822419  | 0.391366081  | 0.695646273 | 0.769523244 | no |
| SLC16A7   | -0.014809601 | -0.391027573 | 0.695896352 | 0.769757765 | no |
| DAPK2     | -0.01480189  | -0.390823918 | 0.696046822 | 0.769882086 | no |
| MRPL27    | 0.014790769  | 0.390530215  | 0.696263845 | 0.770063593 | no |
| KRTAP6-2  | -0.014788836 | -0.390479174 | 0.696301563 | 0.770063593 | no |
| TMEM98    | 0.014787625  | 0.390447207  | 0.696325186 | 0.770063593 | no |
| PGM3      | 0.014774296  | 0.390095181  | 0.696585346 | 0.770309169 | no |
| LOC221122 | 0.014743485  | 0.389281492  | 0.69718683  | 0.770932144 | no |
| KLHDC8B   | 0.014738575  | 0.389151827  | 0.697282696 | 0.770995983 | no |
| PGA3      | -0.014735714 | -0.389076264 | 0.697338566 | 0.771015592 | no |
| FABP3     | -0.014721732 | -0.388707006 | 0.697611608 | 0.771275304 | no |
| ZNF562    | 0.014715664  | 0.388546759  | 0.697730112 | 0.771358825 | no |
| RCHY1     | -0.014713957 | -0.388501672 | 0.697763456 | 0.771358825 | no |
| CLCN2     | 0.014708201  | 0.388349653  | 0.697875884 | 0.771440931 | no |
| ALPI      | -0.014697052 | -0.38805522  | 0.698093657 | 0.771639471 | no |
| AWAT2     | -0.014691657 | -0.387912736 | 0.698199052 | 0.771676654 | no |
| OR2T27    | -0.014690373 | -0.387878844 | 0.698224123 | 0.771676654 | no |
| LOC401387 | 0.014689469  | 0.387854947  | 0.6982418   | 0.771676654 | no |
| C15orf61  | 0.014686991  | 0.387789511  | 0.698290206 | 0.771687968 | no |
| COMTD1    | 0.014683174  | 0.3876887    | 0.698364782 | 0.771728201 | no |
| PROX2     | 0.014677165  | 0.387530029  | 0.698482168 | 0.771815733 | no |
| HTR3A     | -0.014668354 | -0.387297331 | 0.698654331 | 0.771963781 | no |
| NKX2-6    | 0.014664027  | 0.387183058  | 0.698738884 | 0.772015014 | no |
| UGT2A1    | -0.014660094 | -0.387079181 | 0.698815746 | 0.772057746 | no |
| CYP2F1    | -0.014647146 | -0.386737238 | 0.699068786 | 0.77222618  | no |
| SPATA5    | 0.014647078  | 0.386735439  | 0.699070117 | 0.77222618  | no |
| NEK3      | 0.014644617  | 0.386670454  | 0.69911821  | 0.77222618  | no |
| DHX16     | 0.014643514  | 0.38664131   | 0.699139779 | 0.77222618  | no |
| LONRF3    | -0.014642521 | -0.386615101 | 0.699159176 | 0.77222618  | no |
| C3orf27   | -0.014627974 | -0.386230926 | 0.699443521 | 0.772498039 | no |
| ABCC12    | -0.014603874 | -0.385594457 | 0.699914692 | 0.772976197 | no |
| GCC2      | 0.014596216  | 0.385392226  | 0.700064427 | 0.773099332 | no |



|              |              |              |             |             |    |
|--------------|--------------|--------------|-------------|-------------|----|
| ANXA10       | 0.014589856  | 0.385224255  | 0.700188803 | 0.77317291  | no |
| COX4NB       | 0.014586328  | 0.385131081  | 0.700257798 | 0.77317291  | no |
| DNMT1        | -0.014585811 | -0.385117417 | 0.700267916 | 0.77317291  | no |
| WFDC9        | -0.014584952 | -0.38509475  | 0.700284702 | 0.77317291  | no |
| POU4F2       | -0.014583032 | -0.385044029 | 0.700322262 | 0.77317291  | no |
| MC2R         | 0.014568165  | 0.384651419  | 0.700613027 | 0.773451686 | no |
| DDX28        | 0.014565213  | 0.384573459  | 0.700670769 | 0.773473197 | no |
| AMELY        | -0.014541371 | -0.383943813 | 0.701137187 | 0.773945821 | no |
| DKFZp434L192 | 0.014528248  | 0.383597242  | 0.701393962 | 0.774186991 | no |
| SEMA3B       | 0.014524924  | 0.383509462  | 0.701459004 | 0.774216516 | no |
| SNORD8       | -0.014503355 | -0.382939842 | 0.701881124 | 0.774640132 | no |
| TTR          | -0.014499637 | -0.382841641 | 0.701953906 | 0.774661662 | no |
| OR4F5        | 0.014498443  | 0.382810126  | 0.701977264 | 0.774661662 | no |
| FTSJD2       | -0.014491259 | -0.382620381 | 0.702117903 | 0.774717132 | no |
| C14orf70     | 0.014490919  | 0.382611417  | 0.702124547 | 0.774717132 | no |
| CLDN19       | -0.014490003 | -0.38258722  | 0.702142483 | 0.774717132 | no |
| GIF          | -0.014484163 | -0.382432988 | 0.702256809 | 0.774800991 | no |
| RBP7         | 0.014474729  | 0.382183843  | 0.702441504 | 0.774944204 | no |
| C1orf170     | 0.014473617  | 0.382154482  | 0.702463272 | 0.774944204 | no |
| REM1         | -0.0144664   | -0.381963877 | 0.702604584 | 0.775057806 | no |
| TIGD2        | 0.01444958   | 0.381519681  | 0.702933945 | 0.775378826 | no |
| SLC25A46     | 0.014443899  | 0.381369652  | 0.703045201 | 0.77545924  | no |
| IFITM4P      | 0.014435176  | 0.381139283  | 0.703216046 | 0.775575922 | no |
| SPANXC       | 0.01443458   | 0.381123559  | 0.703227708 | 0.775575922 | no |
| ZBTB33       | -0.014427666 | -0.380940965 | 0.703363134 | 0.775682968 | no |
| SEMA4D       | -0.014424287 | -0.380851736 | 0.703429317 | 0.775713643 | no |
| BMP10        | 0.014415727  | 0.380625656  | 0.703597014 | 0.775856255 | no |
| SNHG3-RCC1   | 0.014411646  | 0.3805179    | 0.703676948 | 0.775885675 | no |
| TYR          | 0.014410447  | 0.380486224  | 0.703700447 | 0.775885675 | no |
| DUX4         | -0.014401803 | -0.380257936 | 0.703869805 | 0.776030087 | no |
| AHSP         | 0.014372562  | 0.379485721  | 0.704442794 | 0.776619467 | no |
| KRTAP19-1    | -0.014369771 | -0.379412002 | 0.704497502 | 0.776637432 | no |
| BPIL3        | -0.014364699 | -0.37927808  | 0.704596894 | 0.776704651 | no |
| OR4A16       | -0.014361391 | -0.379190713 | 0.704661736 | 0.776733779 | no |
| DSCR4        | 0.014319862  | 0.378093984  | 0.705475896 | 0.777577213 | no |
| TAC4         | -0.014318438 | -0.378056366 | 0.705503828 | 0.777577213 | no |
| OR7E5P       | -0.01431122  | -0.377865739 | 0.705645377 | 0.777690827 | no |
| PRKDC        | 0.014300546  | 0.377583866  | 0.705854699 | 0.777879118 | no |
| ZNF264       | 0.014297753  | 0.377510097  | 0.705909484 | 0.777883963 | no |
| RTP1         | 0.014296399  | 0.377474333  | 0.705936045 | 0.777883963 | no |
| PLN          | -0.014286937 | -0.377224459 | 0.706121631 | 0.778046058 | no |
| METTL5       | 0.014276799  | 0.376956718  | 0.706320506 | 0.778185823 | no |
| CWC22        | -0.014276514 | -0.376949207 | 0.706326085 | 0.778185823 | no |
| TRIM65       | -0.014274584 | -0.376898241 | 0.706363944 | 0.778185823 | no |
| PPIL1        | 0.014272185  | 0.376834886  | 0.706411008 | 0.778191428 | no |
| LOC642929    | -0.014270401 | -0.376787766 | 0.706446012 | 0.778191428 | no |
| PHKA1        | -0.01426088  | -0.376536331 | 0.706632805 | 0.778354784 | no |
| OR5T3        | -0.014257049 | -0.376435162 | 0.70670797  | 0.778395169 | no |
| NES          | 0.014233686  | 0.375818171  | 0.70716643  | 0.778857705 | no |
| APOA1        | 0.014227989  | 0.375667704  | 0.707278252 | 0.77893843  | no |
| SNORA76      | 0.014224259  | 0.375569206  | 0.707351456 | 0.778976618 | no |

|           |              |              |             |             |    |
|-----------|--------------|--------------|-------------|-------------|----|
| SDK2      | -0.014214806 | -0.375319578 | 0.707536992 | 0.779138502 | no |
| CRYGB     | -0.014187855 | -0.37460783  | 0.708066094 | 0.779678683 | no |
| KLK11     | -0.014175964 | -0.374293803 | 0.708299581 | 0.779863691 | no |
| STAT4     | 0.01417537   | 0.374278104  | 0.708311255 | 0.779863691 | no |
| C4orf40   | -0.014161678 | -0.373916532 | 0.708580129 | 0.780117243 | no |
| SNORD23   | 0.014137818  | 0.373286409  | 0.709048791 | 0.780590714 | no |
| PAK1      | -0.014130991 | -0.373106118 | 0.709182906 | 0.78069585  | no |
| CRISP3    | 0.014125257  | 0.372954695  | 0.709295553 | 0.780777344 | no |
| COL9A3    | 0.014113302  | 0.372638987  | 0.709530436 | 0.780993377 | no |
| OR4K17    | -0.014109612 | -0.372541541 | 0.709602939 | 0.781030662 | no |
| OR51A4    | -0.014106658 | -0.372463528 | 0.709660987 | 0.781052032 | no |
| RNF216L   | 0.014101812  | 0.372335537  | 0.709756224 | 0.781114329 | no |
| SLC9A3    | -0.014068486 | -0.371455442 | 0.710411224 | 0.781792626 | no |
| DEFB115   | -0.014050111 | -0.370970198 | 0.710772452 | 0.782147577 | no |
| UCHL1     | -0.014046587 | -0.370877118 | 0.710841751 | 0.782181263 | no |
| RALGAPB   | 0.014043593  | 0.370798072  | 0.710900603 | 0.782183715 | no |
| CPB2      | -0.014041037 | -0.370730566 | 0.710950864 | 0.782183715 | no |
| DEFB125   | 0.01404057   | 0.37071824   | 0.710960042 | 0.782183715 | no |
| C6orf41   | 0.014023353  | 0.370263545  | 0.711298619 | 0.782485777 | no |
| POU5F2    | 0.014022672  | 0.370245572  | 0.711312004 | 0.782485777 | no |
| SCARNA17  | -0.014016427 | -0.370080653 | 0.711434821 | 0.782578303 | no |
| DDAH2     | 0.014012797  | 0.369984792  | 0.711506215 | 0.782614256 | no |
| RPL10A    | -0.014008173 | -0.369862679 | 0.711597162 | 0.782671712 | no |
| STX10     | 0.013993829  | 0.369483856  | 0.711879329 | 0.78293947  | no |
| ATAD5     | -0.013987287 | -0.369311107 | 0.712008014 | 0.783038405 | no |
| GNAT1     | 0.01398178   | 0.369165661  | 0.712116368 | 0.78311497  | no |
| BRD4      | -0.013977939 | -0.369064232 | 0.712191932 | 0.783155471 | no |
| ZNF511    | -0.013972986 | -0.368933436 | 0.71228938  | 0.78322003  | no |
| OR10Z1    | -0.013940389 | -0.368072603 | 0.71293085  | 0.783882746 | no |
| PPM1D     | -0.013931255 | -0.367831387 | 0.713110635 | 0.784031294 | no |
| ARL4A     | 0.013929585  | 0.36778728   | 0.71314351  | 0.784031294 | no |
| MEX3C     | -0.013923943 | -0.367638271 | 0.71325458  | 0.784110766 | no |
| MAD2L2    | 0.013881881  | 0.366527488  | 0.714082739 | 0.784939426 | no |
| TTC9      | -0.013881715 | -0.366523108 | 0.714086005 | 0.784939426 | no |
| LOC645431 | -0.013879012 | -0.366451724 | 0.714139239 | 0.784940853 | no |
| SNORA72   | 0.013877706  | 0.366417245  | 0.714164951 | 0.784940853 | no |
| SMARCA1   | 0.013874436  | 0.366330885  | 0.714229355 | 0.784968966 | no |
| NFU1      | -0.01386822  | -0.366166728 | 0.714351781 | 0.785060842 | no |
| MTMR8     | 0.013859475  | 0.36593578   | 0.714524033 | 0.785207463 | no |
| PRPS1L1   | -0.01385492  | -0.365815489 | 0.714613758 | 0.78525045  | no |
| UBQLN1    | -0.013851718 | -0.365730925 | 0.714676836 | 0.78525045  | no |
| RFC5      | -0.013850142 | -0.365689328 | 0.714707864 | 0.78525045  | no |
| LOC91948  | 0.013849074  | 0.365661115  | 0.71472891  | 0.78525045  | no |
| GFPT1     | -0.013846663 | -0.365597443 | 0.714776407 | 0.78525045  | no |
| PIK3CA    | -0.013845659 | -0.365570928 | 0.714796186 | 0.78525045  | no |
| CHAC2     | -0.013839361 | -0.365404619 | 0.714920253 | 0.785344073 | no |
| LOC284379 | -0.013831476 | -0.365196378 | 0.715075611 | 0.785472058 | no |
| SCARNA11  | 0.013821108  | 0.364922565  | 0.715279908 | 0.785653782 | no |
| LARP6     | 0.013802979  | 0.364443809  | 0.715637164 | 0.786003487 | no |
| C8G       | 0.01379229   | 0.364161531  | 0.715847835 | 0.786192163 | no |
| TPD52L1   | -0.013782237 | -0.363896058 | 0.716045983 | 0.786367066 | no |

|              |              |              |             |             |    |
|--------------|--------------|--------------|-------------|-------------|----|
| MOG          | 0.013769248  | 0.363553052  | 0.71630203  | 0.786605532 | no |
| SPANXB2      | 0.013742101  | 0.362836145  | 0.71683729  | 0.787150572 | no |
| SUN5         | -0.013735447 | -0.362660421 | 0.716968511 | 0.787251907 | no |
| B3GNTL1      | -0.013714261 | -0.362100938 | 0.717386358 | 0.787667937 | no |
| POTEA        | -0.013710249 | -0.361994989 | 0.717465495 | 0.787712049 | no |
| BRAF         | 0.013704156  | 0.361834077  | 0.717585692 | 0.787801234 | no |
| SCGB1C1      | -0.013695709 | -0.361611005 | 0.717752332 | 0.787941393 | no |
| LACRT        | 0.013685283  | 0.361335665  | 0.717958036 | 0.78812442  | no |
| UBE2V1       | -0.013682696 | -0.361267349 | 0.718009077 | 0.788137658 | no |
| MYBPC1       | 0.013678853  | 0.361165877  | 0.718084893 | 0.788178087 | no |
| ABRA         | 0.013674613  | 0.361053912  | 0.718168552 | 0.78822712  | no |
| RNASE11      | 0.013663804  | 0.360768459  | 0.718381854 | 0.788418431 | no |
| SYPL2        | -0.013651098 | -0.360432909 | 0.718632619 | 0.788650833 | no |
| RBMXL1       | -0.013647526 | -0.360338578 | 0.718703121 | 0.788685394 | no |
| MS4A15       | -0.013639581 | -0.360128784 | 0.718859927 | 0.788814654 | no |
| AHRR         | -0.01363452  | -0.359995119 | 0.718959837 | 0.788881471 | no |
| AADACL2      | 0.013620388  | 0.359621917  | 0.71923882  | 0.78909737  | no |
| DEFB114      | -0.013618976 | -0.359584643 | 0.719266686 | 0.78909737  | no |
| YEATS4       | 0.013617201  | 0.359537771  | 0.719301728 | 0.78909737  | no |
| DLK1         | 0.013616645  | 0.359523071  | 0.719312718 | 0.78909737  | no |
| CXorf56      | 0.013610673  | 0.359365365  | 0.719430625 | 0.789183896 | no |
| NKAP         | 0.013601597  | 0.359125687  | 0.71960983  | 0.789337649 | no |
| SCN10A       | -0.013597283 | -0.359011753 | 0.719695023 | 0.789353487 | no |
| MYF5         | -0.013596911 | -0.35900195  | 0.719702353 | 0.789353487 | no |
| LYRM4        | 0.013593874  | 0.358921734  | 0.719762336 | 0.789376453 | no |
| SERPINA4     | -0.013583774 | -0.358655004 | 0.719961801 | 0.78955238  | no |
| PKP1         | -0.013575513 | -0.358436862 | 0.720124945 | 0.78968846  | no |
| OR7E24       | 0.01356933   | 0.358273568  | 0.720247077 | 0.789758907 | no |
| FGF16        | -0.013568305 | -0.358246516 | 0.720267311 | 0.789758907 | no |
| STARD7       | -0.01354602  | -0.357658003 | 0.720707541 | 0.790181238 | no |
| TBX22        | -0.01354485  | -0.357627118 | 0.720730646 | 0.790181238 | no |
| NXF5         | -0.013533649 | -0.357331323 | 0.72095195  | 0.790381007 | no |
| LRRC40       | 0.013530909  | 0.357258942  | 0.721006107 | 0.79039752  | no |
| LOC200030    | -0.013526449 | -0.357141179 | 0.721094221 | 0.790451256 | no |
| CYP2W1       | -0.013518683 | -0.356936096 | 0.721247682 | 0.790576613 | no |
| CCHCR1       | -0.013516177 | -0.356869912 | 0.721297209 | 0.790588039 | no |
| DYSFIP1      | 0.013512944  | 0.356784538  | 0.721361097 | 0.790615204 | no |
| SNORA62      | -0.013497648 | -0.356380591 | 0.721663413 | 0.790874637 | no |
| LOC100133920 | 0.013496645  | 0.356354111  | 0.721683233 | 0.790874637 | no |
| OR6A2        | -0.01349503  | -0.356311457 | 0.721715158 | 0.790874637 | no |
| CCDC106      | -0.013482045 | -0.355968563 | 0.721971822 | 0.791113018 | no |
| PRR15L       | 0.013464519  | 0.355505742  | 0.722318304 | 0.791449787 | no |
| NXF2         | -0.013452881 | -0.355198388 | 0.72254843  | 0.791638041 | no |
| GLOD5        | 0.013451531  | 0.355162752  | 0.722575113 | 0.791638041 | no |
| OR4C45       | -0.013449889 | -0.355119393 | 0.72260758  | 0.791638041 | no |
| C4orf48      | -0.01344589  | -0.355013766 | 0.722686675 | 0.791681794 | no |
| tAKR         | -0.013420325 | -0.354338666 | 0.723192266 | 0.792192731 | no |
| OR2G6        | -0.013412147 | -0.354122706 | 0.723354027 | 0.792326998 | no |
| OR56A3       | -0.013392407 | -0.353601398 | 0.723744554 | 0.792674118 | no |
| HOXD3        | -0.013392165 | -0.353595006 | 0.723749343 | 0.792674118 | no |
| LYZL6        | -0.013386421 | -0.353443314 | 0.723862994 | 0.792755647 | no |

|              |              |              |             |             |    |
|--------------|--------------|--------------|-------------|-------------|----|
| C9orf98      | 0.013353987  | 0.35258681   | 0.724504818 | 0.793415579 | no |
| AKT1S1       | 0.01335023   | 0.352487586  | 0.724579185 | 0.793454041 | no |
| KIAA0753     | -0.013335338 | -0.352094341 | 0.72487394  | 0.793690063 | no |
| C7orf65      | -0.013335014 | -0.352085778 | 0.724880359 | 0.793690063 | no |
| DDC          | -0.013333391 | -0.352042915 | 0.724912489 | 0.793690063 | no |
| ZNF621       | 0.01332975   | 0.351946762  | 0.724984567 | 0.793716895 | no |
| BNIP1        | -0.013328187 | -0.351905484 | 0.725015512 | 0.793716895 | no |
| LOC100129066 | 0.013318283  | 0.351643954  | 0.725211576 | 0.79388855  | no |
| KRT17        | 0.01331565   | 0.351574422  | 0.725263706 | 0.793902631 | no |
| SNORD22      | -0.013309389 | -0.351409069 | 0.725387681 | 0.793991401 | no |
| TMEM144      | 0.013306551  | 0.351334144  | 0.725443859 | 0.793991401 | no |
| WIPI2        | -0.013305604 | -0.351309128 | 0.725462615 | 0.793991401 | no |
| AGBL5        | 0.013297976  | 0.351107684  | 0.725613665 | 0.794113731 | no |
| LOC100133308 | -0.013289659 | -0.350888056 | 0.725778361 | 0.794250982 | no |
| ILF2         | -0.013279517 | -0.350620236 | 0.725979213 | 0.794427783 | no |
| GH2          | -0.013269286 | -0.350350039 | 0.726181866 | 0.794606536 | no |
| C19orf2      | 0.013262191  | 0.350162678  | 0.726322402 | 0.794717303 | no |
| UBE2U        | -0.013238638 | -0.349540716 | 0.726788991 | 0.795151306 | no |
| NOSTRIN      | 0.013238198  | 0.349529093  | 0.726797712 | 0.795151306 | no |
| MSMB         | -0.013230739 | -0.349332123 | 0.726945498 | 0.795269958 | no |
| DIO2         | 0.013228034  | 0.349260683  | 0.726999102 | 0.795285567 | no |
| FAM84A       | -0.01322282  | -0.349122999 | 0.727102415 | 0.79535555  | no |
| PAPOLB       | -0.013206575 | -0.348693986 | 0.727424361 | 0.795664669 | no |
| ACTC1        | -0.013202302 | -0.348581166 | 0.727509034 | 0.795714236 | no |
| PLA2G4F      | -0.013193516 | -0.348349127 | 0.727683191 | 0.795861666 | no |
| KRTAP10-6    | -0.013165058 | -0.347597638 | 0.72824732  | 0.796435566 | no |
| C1orf14      | -0.013161826 | -0.347512291 | 0.728311397 | 0.796462561 | no |
| YARS         | -0.013139999 | -0.346935867 | 0.728744221 | 0.796890269 | no |
| ZBTB25       | 0.013138127  | 0.346886442  | 0.728781337 | 0.796890269 | no |
| PRB3         | 0.013135125  | 0.346807158  | 0.728840877 | 0.796912274 | no |
| HDAC9        | -0.013129172 | -0.346649961 | 0.728958933 | 0.796998254 | no |
| FDXR         | 0.013126266  | 0.346573213  | 0.729016574 | 0.797018174 | no |
| C17orf85     | 0.013118998  | 0.346381282  | 0.729160728 | 0.79713267  | no |
| ODZ3         | 0.01311442   | 0.346260396  | 0.729251527 | 0.797188827 | no |
| SIRT7        | -0.01310815  | -0.346094812 | 0.729375905 | 0.797235471 | no |
| ZSCAN4       | -0.013107555 | -0.346079116 | 0.729387696 | 0.797235471 | no |
| TECTB        | -0.013106305 | -0.346046107 | 0.729412491 | 0.797235471 | no |
| HRASLS       | -0.013101676 | -0.345923861 | 0.729504323 | 0.79729274  | no |
| ANXA8        | -0.013089767 | -0.345609376 | 0.729740581 | 0.797507842 | no |
| RSP04        | -0.013087415 | -0.345547269 | 0.729787243 | 0.797515727 | no |
| SFRP5        | -0.013076892 | -0.345269384 | 0.729996032 | 0.797700777 | no |
| NOL9         | 0.013065085  | 0.344957593  | 0.73023032  | 0.797913668 | no |
| CXADRP3      | 0.01304423   | 0.344406846  | 0.730644227 | 0.798322794 | no |
| ASTL         | 0.013028232  | 0.343984392  | 0.730961771 | 0.798622244 | no |
| C8orf71      | -0.013026443 | -0.343937139 | 0.730997292 | 0.798622244 | no |
| AMELX        | -0.013021854 | -0.343815966 | 0.731088383 | 0.798641103 | no |
| ACSL3        | -0.013019036 | -0.343741551 | 0.731144327 | 0.798641103 | no |
| SNORA69      | -0.013016556 | -0.343676067 | 0.731193557 | 0.798641103 | no |
| IGFL2        | 0.013016475  | 0.343673923  | 0.731195169 | 0.798641103 | no |
| PRL          | -0.013013376 | -0.343592067 | 0.731256709 | 0.798641103 | no |
| CDKN2AIP     | -0.013012734 | -0.343575131 | 0.731269442 | 0.798641103 | no |

|              |              |              |             |             |    |
|--------------|--------------|--------------|-------------|-------------|----|
| RLBP1        | -0.013011645 | -0.343546371 | 0.731291064 | 0.798641103 | no |
| SERPINB3     | -0.012993675 | -0.343071816 | 0.731647879 | 0.798920503 | no |
| C14orf39     | -0.012993135 | -0.343057555 | 0.731658603 | 0.798920503 | no |
| MY07B        | -0.01299279  | -0.343048451 | 0.731665449 | 0.798920503 | no |
| OR6C3        | -0.012984004 | -0.342816453 | 0.73183991  | 0.799067845 | no |
| AKR1E2       | 0.012980675  | 0.342728522  | 0.731906037 | 0.799096892 | no |
| PGA5         | 0.012975121  | 0.342581871  | 0.732016327 | 0.799174151 | no |
| LOC645332    | -0.012968672 | -0.34241156  | 0.732144419 | 0.799270835 | no |
| C20orf191    | -0.012962961 | -0.342260752 | 0.732257848 | 0.799351502 | no |
| ARHGEF16     | -0.012956657 | -0.342094279 | 0.732383066 | 0.799403365 | no |
| OR4C15       | 0.012956588  | 0.342092458  | 0.732384436 | 0.799403365 | no |
| AFARP1       | -0.012952253 | -0.341977984 | 0.732470546 | 0.799435789 | no |
| TMEM79       | 0.012951112  | 0.341947838  | 0.732493223 | 0.799435789 | no |
| NKX6-2       | 0.012948835  | 0.341887718  | 0.732538449 | 0.799441993 | no |
| CACNA1G      | -0.01294652  | -0.341826591 | 0.732584433 | 0.799449024 | no |
| PGLYRP3      | 0.012937768  | 0.341595461  | 0.732758313 | 0.799595616 | no |
| MOGAT1       | 0.012932284  | 0.341450637  | 0.732867272 | 0.799671353 | no |
| TBC1D28      | 0.012924829  | 0.34125378   | 0.733015387 | 0.799789806 | no |
| TPCN1        | 0.012920884  | 0.341149596  | 0.733093779 | 0.799832174 | no |
| PACRG        | 0.012916314  | 0.34102893   | 0.733184576 | 0.799888072 | no |
| RGPD1        | 0.012912028  | 0.340915746  | 0.733269746 | 0.799937826 | no |
| CCDC27       | 0.012902481  | 0.340663631  | 0.733459474 | 0.800101632 | no |
| LGALS13      | 0.012894735  | 0.340459086  | 0.733613415 | 0.800226384 | no |
| TAF6         | -0.012870291 | -0.339813575 | 0.734099297 | 0.800713185 | no |
| RPL23AP32    | -0.012868204 | -0.339758475 | 0.734140777 | 0.80071523  | no |
| MYL2         | -0.012863138 | -0.33962469  | 0.734241493 | 0.80075477  | no |
| LOC723809    | 0.012862396  | 0.3396051    | 0.734256241 | 0.80075477  | no |
| CENPQ        | 0.012852603  | 0.339346476  | 0.734450955 | 0.800923916 | no |
| FAM166A      | -0.01284636  | -0.339181635 | 0.734575069 | 0.800989644 | no |
| EFTUD1       | 0.012845586  | 0.33916119   | 0.734590463 | 0.800989644 | no |
| NPS          | 0.012839454  | 0.338999263  | 0.734712391 | 0.80107939  | no |
| TTY19        | 0.012835812  | 0.338903088  | 0.734784812 | 0.801115149 | no |
| H2AFB1       | -0.01282622  | -0.338649787 | 0.734975562 | 0.801279909 | no |
| AANAT        | 0.012815497  | 0.338366627  | 0.735188818 | 0.801469186 | no |
| TBC1D9       | 0.012804089  | 0.338065375  | 0.735415721 | 0.801673319 | no |
| LOC100144604 | -0.01280111  | -0.337986705 | 0.73547498  | 0.801694691 | no |
| CSAG3        | 0.012797723  | 0.337897249  | 0.735542364 | 0.801711744 | no |
| KRTAP19-5    | -0.012796337 | -0.337860655 | 0.73556993  | 0.801711744 | no |
| PHKG1        | 0.01278489   | 0.337558378  | 0.735797644 | 0.801916704 | no |
| LOC284661    | -0.012782815 | -0.337503572 | 0.735838934 | 0.801918476 | no |
| KRTAP20-4    | -0.012754821 | -0.336764325 | 0.73639594  | 0.802482246 | no |
| POM121L12    | -0.012744321 | -0.336487061 | 0.736604888 | 0.802666682 | no |
| CYTSA        | 0.012741153  | 0.336403386  | 0.73666795  | 0.802692137 | no |
| BAG3         | 0.012737631  | 0.33631038   | 0.736738046 | 0.802715708 | no |
| MAVS         | -0.012736076 | -0.336269326 | 0.736768988 | 0.802715708 | no |
| HOXC12       | -0.012731058 | -0.336136805 | 0.736868871 | 0.802779694 | no |
| PLEKHA5      | -0.012729135 | -0.336086047 | 0.736907129 | 0.802779694 | no |
| SEMA6D       | 0.012725156  | 0.335980955  | 0.736986343 | 0.80282273  | no |
| MGA          | 0.012720014  | 0.335845189  | 0.737088681 | 0.802890952 | no |
| ABCC6P1      | 0.01270789   | 0.335525009  | 0.737330048 | 0.803090473 | no |
| ZNF787       | 0.012706823  | 0.335496828  | 0.737351293 | 0.803090473 | no |

|            |              |              |             |             |    |
|------------|--------------|--------------|-------------|-------------|----|
| VAV2       | 0.012687497  | 0.334986486  | 0.737736069 | 0.803466029 | no |
| TECR       | 0.012685512  | 0.334934076  | 0.737775587 | 0.803466029 | no |
| SLC34A1    | 0.012672942  | 0.334602136  | 0.738025896 | 0.803660002 | no |
| GANC       | 0.012672575  | 0.334592449  | 0.738033201 | 0.803660002 | no |
| OR4D9      | -0.012662855 | -0.33433578  | 0.738226769 | 0.803786057 | no |
| DSG4       | 0.01266277   | 0.334333519  | 0.738228474 | 0.803786057 | no |
| ZNF304     | 0.012646423  | 0.333901858  | 0.738554051 | 0.804066606 | no |
| C18orf20   | -0.012645839 | -0.333886439 | 0.738565681 | 0.804066606 | no |
| SMN2       | 0.012640027  | 0.333732938  | 0.73868147  | 0.804116064 | no |
| RPS29      | 0.012638642  | 0.333696367  | 0.738709057 | 0.804116064 | no |
| ADAMTSL3   | -0.012637569 | -0.333668039 | 0.738730427 | 0.804116064 | no |
| THEM4      | 0.01262278   | 0.333277505  | 0.739025047 | 0.804356017 | no |
| ERI3       | 0.012622509  | 0.333270361  | 0.739030436 | 0.804356017 | no |
| USP16      | 0.012620152  | 0.33320811   | 0.739077403 | 0.804363833 | no |
| GUCA2A     | 0.012606684  | 0.332852453  | 0.739345751 | 0.804612574 | no |
| DPY19L2P2  | -0.01260285  | -0.332751208 | 0.739422148 | 0.804652402 | no |
| NCRNA00200 | -0.012594954 | -0.332542699 | 0.739579491 | 0.80478031  | no |
| SOX10      | 0.012583391  | 0.332237365  | 0.73980992  | 0.804987727 | no |
| GSTT1      | -0.012572956 | -0.331961799 | 0.740017903 | 0.805170701 | no |
| KCNJ13     | -0.012562546 | -0.331686895 | 0.740225405 | 0.805352833 | no |
| ALDH1B1    | -0.012560561 | -0.331634489 | 0.740264964 | 0.805352833 | no |
| ABCA4      | -0.012548355 | -0.331312164 | 0.74050829  | 0.805574205 | no |
| FGF23      | -0.012539437 | -0.33107667  | 0.740686082 | 0.805724266 | no |
| GKN1       | -0.012531781 | -0.330874505 | 0.740838723 | 0.805824402 | no |
| ZNF479     | -0.012530822 | -0.330849175 | 0.740857848 | 0.805824402 | no |
| ZFATAS     | -0.012526377 | -0.330731803 | 0.740946473 | 0.805848724 | no |
| CCNH       | -0.012525703 | -0.330713987 | 0.740959926 | 0.805848724 | no |
| TEX11      | 0.012518828  | 0.330532445  | 0.741097012 | 0.805954461 | no |
| CACNA1S    | 0.012511145  | 0.330329573  | 0.741250214 | 0.806077713 | no |
| OR51F1     | -0.012497098 | -0.329958626 | 0.741530368 | 0.806338997 | no |
| UGT1A8     | 0.012477823  | 0.32944962   | 0.741914844 | 0.806713688 | no |
| C6orf201   | -0.012472938 | -0.32932063  | 0.742012287 | 0.806776253 | no |
| SSX4       | -0.012465692 | -0.329129294 | 0.742156835 | 0.806806519 | no |
| CYP4F8     | 0.012465615  | 0.329127259  | 0.742158373 | 0.806806519 | no |
| DCHS2      | 0.012465542  | 0.329125317  | 0.74215984  | 0.806806519 | no |
| TKTL1      | 0.01245564   | 0.32886384   | 0.742357392 | 0.806977889 | no |
| CNTNAP1    | -0.012433052 | -0.328267365 | 0.742808108 | 0.807393153 | no |
| PHF15      | 0.012432493  | 0.328252593  | 0.742819271 | 0.807393153 | no |
| PSG6       | -0.012420125 | -0.327925997 | 0.743066096 | 0.807618016 | no |
| MRAP2      | -0.01241415  | -0.327768211 | 0.743185353 | 0.807704212 | no |
| ADAMTSL5   | -0.012406455 | -0.327565009 | 0.743338944 | 0.807827713 | no |
| DNAJA2     | -0.012400179 | -0.327399289 | 0.743464211 | 0.807920421 | no |
| GTF3C6     | -0.012398074 | -0.327343701 | 0.743506232 | 0.807922659 | no |
| LOC731779  | 0.012395583  | 0.327277922  | 0.743555957 | 0.807933269 | no |
| ACCSL      | -0.012387372 | -0.32706111  | 0.743719862 | 0.808067937 | no |
| NCRNA00111 | -0.012362495 | -0.326404186 | 0.744216554 | 0.808564151 | no |
| MFN2       | -0.012359106 | -0.326314687 | 0.744284231 | 0.808594228 | no |
| TMEM202    | 0.012355938  | 0.32623103   | 0.744347493 | 0.808619505 | no |
| C9orf144   | 0.012351019  | 0.326101135  | 0.744445722 | 0.808682764 | no |
| PARP11     | -0.012307701 | -0.324957254 | 0.745310935 | 0.809579138 | no |
| ACYP2      | -0.012301852 | -0.324802797 | 0.745427789 | 0.809662568 | no |

|           |              |              |             |             |    |
|-----------|--------------|--------------|-------------|-------------|----|
| MS4A8B    | -0.012296353 | -0.324657579 | 0.745537658 | 0.809738403 | no |
| CEP290    | -0.012270757 | -0.323981679 | 0.746049099 | 0.810246375 | no |
| SHPK      | 0.012268935  | 0.32393357   | 0.746085506 | 0.810246375 | no |
| KRT34     | -0.01226671  | -0.323874814 | 0.746129971 | 0.810251142 | no |
| RASSF7    | 0.012261524  | 0.323737862  | 0.746233618 | 0.810320172 | no |
| SNORA11D  | -0.012257569 | -0.323633414 | 0.746312668 | 0.810358329 | no |
| COL24A1   | 0.012255755  | 0.323585517  | 0.746348919 | 0.810358329 | no |
| LOC127841 | 0.012237676  | 0.323108121  | 0.746710269 | 0.810707133 | no |
| FLJ46321  | -0.012233814 | -0.323006141 | 0.746787468 | 0.81074741  | no |
| ARHGAP28  | -0.012226613 | -0.322815977 | 0.746931427 | 0.810860158 | no |
| OR4K15    | -0.012224157 | -0.322751113 | 0.746980532 | 0.810863303 | no |
| C21orf15  | 0.012222456  | 0.3227062    | 0.747014535 | 0.810863303 | no |
| MEGF6     | 0.012219488  | 0.322627826  | 0.747073871 | 0.810884174 | no |
| UBXN2B    | -0.012213577 | -0.322471729 | 0.747192054 | 0.810968915 | no |
| OTX2      | -0.012206286 | -0.322279196 | 0.747337832 | 0.811083595 | no |
| OR51D1    | -0.012204183 | -0.322223684 | 0.747379865 | 0.811085674 | no |
| BCKDHB    | -0.012201758 | -0.322159643 | 0.747428357 | 0.811094763 | no |
| MAGEA6    | -0.012194993 | -0.321981005 | 0.747563627 | 0.811198015 | no |
| CSNK1G3   | -0.012188239 | -0.321802654 | 0.747698689 | 0.81130103  | no |
| NLRP8     | 0.012181172  | 0.32161603   | 0.747840023 | 0.811409001 | no |
| TMEM30C   | -0.01217925  | -0.321565276 | 0.747878461 | 0.811409001 | no |
| FAM125A   | 0.012176596  | 0.321495204  | 0.747931531 | 0.8114198   | no |
| C20orf96  | 0.01217439   | 0.321436933  | 0.747975665 | 0.8114198   | no |
| LOC285629 | -0.012172732 | -0.321393163 | 0.748008816 | 0.8114198   | no |
| TDRD1     | 0.012156107  | 0.320954148  | 0.748341348 | 0.811736969 | no |
| EPHA7     | -0.01212024  | -0.320007031 | 0.749058902 | 0.812471721 | no |
| WFIKKN2   | -0.012112555 | -0.319804082 | 0.749212689 | 0.812594933 | no |
| SALL1     | -0.012106913 | -0.319655112 | 0.749325579 | 0.812673777 | no |
| OR9K2     | 0.012096961  | 0.319392317  | 0.749524739 | 0.812815708 | no |
| C5orf44   | 0.012096249  | 0.319373498  | 0.749539001 | 0.812815708 | no |
| KRTAP20-2 | -0.012094347 | -0.319323289 | 0.749577054 | 0.812815708 | no |
| CDC37     | 0.012088165  | 0.319160027  | 0.749700794 | 0.812906288 | no |
| TFAP2D    | -0.012084915 | -0.319074221 | 0.74976583  | 0.812933209 | no |
| IFIT1B    | 0.012081424  | 0.318982038  | 0.749835703 | 0.812965371 | no |
| BTN1A1    | 0.012062621  | 0.318485504  | 0.750212097 | 0.813235454 | no |
| ITSN1     | -0.012061836 | -0.318464781 | 0.750227807 | 0.813235454 | no |
| ZNF596    | -0.012060965 | -0.31844177  | 0.750245252 | 0.813235454 | no |
| C10orf116 | -0.01206087  | -0.318439275 | 0.750247143 | 0.813235454 | no |
| H2AFX     | -0.012057657 | -0.318354427 | 0.750311469 | 0.813235454 | no |
| SAGE1     | 0.012056924  | 0.318335058  | 0.750326153 | 0.813235454 | no |
| SOX14     | 0.012053072  | 0.318233354  | 0.75040326  | 0.813249523 | no |
| PYY       | -0.012052257 | -0.318211827 | 0.750419582 | 0.813249523 | no |
| LZTR1     | 0.012045353  | 0.318029509  | 0.750557813 | 0.813355731 | no |
| LRRC37A3  | 0.012037689  | 0.317827139  | 0.750711258 | 0.813478412 | no |
| ZC3HC1    | 0.012013344  | 0.317184266  | 0.751198774 | 0.813950629 | no |
| CIRH1A    | -0.012010629 | -0.317112572 | 0.751253148 | 0.813950629 | no |
| RASIP1    | 0.012009896  | 0.317093234  | 0.751267815 | 0.813950629 | no |
| SPATA22   | -0.01200253  | -0.316898709 | 0.751415355 | 0.814066855 | no |
| USP26     | -0.011999504 | -0.316818814 | 0.751475955 | 0.814088885 | no |
| DCUN1D4   | -0.011987469 | -0.316501    | 0.751717031 | 0.814306416 | no |
| DPM2      | 0.011973843  | 0.316141202  | 0.751989983 | 0.814522388 | no |

|              |              |              |             |             |    |
|--------------|--------------|--------------|-------------|-------------|----|
| PLEKHM2      | 0.011973494  | 0.316131982  | 0.751996978 | 0.814522388 | no |
| ZNF625       | -0.01196697  | -0.315959695 | 0.75212769  | 0.814620327 | no |
| KRT3         | 0.011951512  | 0.315551497  | 0.752437415 | 0.81491213  | no |
| OR5L1        | 0.011938928  | 0.315219209  | 0.752689572 | 0.815141559 | no |
| PRTN3        | -0.011923565 | -0.314813516 | 0.752997468 | 0.815427919 | no |
| ZNF225       | -0.011921709 | -0.314764518 | 0.753034656 | 0.815427919 | no |
| TGFBR3       | -0.011913656 | -0.314551877 | 0.753196056 | 0.815559012 | no |
| KRTAP4-2     | -0.011908    | -0.314402512 | 0.753309434 | 0.815596562 | no |
| C11orf40     | -0.011907606 | -0.314392098 | 0.753317339 | 0.815596562 | no |
| KIF17        | -0.011905889 | -0.314346759 | 0.753351756 | 0.815596562 | no |
| CCDC60       | -0.011900691 | -0.31420952  | 0.753455935 | 0.815636076 | no |
| RPS17        | -0.011900043 | -0.314192391 | 0.753468939 | 0.815636076 | no |
| LYSMD2       | 0.011890842  | 0.313949427  | 0.753653389 | 0.815767144 | no |
| KRTAP21-2    | 0.011889978  | 0.313926607  | 0.753670713 | 0.815767144 | no |
| LOC100130093 | 0.011865986  | 0.313293083  | 0.754151731 | 0.816244095 | no |
| PGAM4        | -0.011848965 | -0.312843623 | 0.754493053 | 0.816569806 | no |
| FBR3         | 0.011839567  | 0.312595441  | 0.754681543 | 0.816730085 | no |
| GABARAP      | -0.011835636 | -0.312491656 | 0.754760371 | 0.816771674 | no |
| POLR2B       | 0.011831861  | 0.312391973  | 0.754836086 | 0.81680989  | no |
| PRY2         | -0.011819035 | -0.312053281 | 0.755093357 | 0.817044554 | no |
| KC6          | -0.011810195 | -0.311819833 | 0.755270701 | 0.817192713 | no |
| MAGEC2       | -0.011787113 | -0.311210336 | 0.755733779 | 0.817592645 | no |
| EIF1AY       | -0.011786247 | -0.311187458 | 0.755751164 | 0.817592645 | no |
| CYP2A13      | -0.011785227 | -0.311160518 | 0.755771634 | 0.817592645 | no |
| TSSK6        | -0.011783709 | -0.311120445 | 0.755802084 | 0.817592645 | no |
| LOC401463    | 0.011781506  | 0.311062268  | 0.755846291 | 0.817596721 | no |
| OBP2A        | -0.011750097 | -0.310232867 | 0.756476617 | 0.818234765 | no |
| SPINT3       | -0.011726967 | -0.309622106 | 0.756940885 | 0.818693137 | no |
| CSHL1        | 0.011714793  | 0.309300639  | 0.757185282 | 0.818901152 | no |
| KRTAP15-1    | 0.011713352  | 0.309262582  | 0.757214217 | 0.818901152 | no |
| EIF3D        | -0.011697518 | -0.30884447  | 0.75753213  | 0.819201145 | no |
| LOC285045    | -0.011693869 | -0.308748104 | 0.757605408 | 0.81923657  | no |
| ATAD2        | 0.011670708  | 0.308136529  | 0.758070509 | 0.819695665 | no |
| ACE2         | -0.011667805 | -0.308059855 | 0.758128825 | 0.819714882 | no |
| TMEM184B     | 0.011654254  | 0.307702041  | 0.758400989 | 0.819965304 | no |
| KIAA1429     | 0.011639905  | 0.307323119  | 0.75868924  | 0.820233092 | no |
| DFFB         | 0.011596396  | 0.306174232  | 0.759563421 | 0.821117655 | no |
| FAM83B       | -0.01159514  | -0.30614107  | 0.759588659 | 0.821117655 | no |
| NAP1L6       | -0.011592572 | -0.30607324  | 0.75964028  | 0.821129554 | no |
| CT47B1       | 0.011581846  | 0.305790013  | 0.75985584  | 0.821318651 | no |
| FZD10        | 0.011576527  | 0.305649567  | 0.759962738 | 0.821351065 | no |
| IFT81        | 0.011576311  | 0.305643866  | 0.759967077 | 0.821351065 | no |
| CDS2         | -0.011561161 | -0.305243807 | 0.760271601 | 0.821636264 | no |
| MRGPRX1      | -0.011558656 | -0.305177654 | 0.760321961 | 0.821646769 | no |
| SNORD15A     | 0.011548393  | 0.304906669  | 0.760528259 | 0.82182578  | no |
| AP1M2        | -0.011537866 | -0.304628677 | 0.76073991  | 0.822010555 | no |
| FAM9C        | 0.011529369  | 0.304404299  | 0.760910754 | 0.822127067 | no |
| SPC25        | 0.011528458  | 0.304380254  | 0.760929063 | 0.822127067 | no |
| CXorf66      | -0.011517772 | -0.30409808  | 0.761143933 | 0.822315274 | no |
| BTBD7        | -0.011512742 | -0.303965261 | 0.761245077 | 0.822380602 | no |
| MRGPRX2      | -0.011508563 | -0.303854905 | 0.76132912  | 0.822427449 | no |



|          |              |              |             |             |    |
|----------|--------------|--------------|-------------|-------------|----|
| GJB7     | 0.011489977  | 0.303364126  | 0.761702909 | 0.822787274 | no |
| APOA4    | -0.011486558 | -0.303273836 | 0.761771682 | 0.822817601 | no |
| KL       | -0.011459451 | -0.302558064 | 0.762316946 | 0.823362573 | no |
| STK35    | 0.011456914  | 0.302491057  | 0.762367996 | 0.823373726 | no |
| LALBA    | 0.011445482  | 0.302189183  | 0.762597999 | 0.823559576 | no |
| OR51M1   | 0.011444312  | 0.302158283  | 0.762621544 | 0.823559576 | no |
| TRIM49   | -0.01143082  | -0.301802031 | 0.762893008 | 0.823749205 | no |
| TMEM192  | 0.011430755  | 0.30180031   | 0.76289432  | 0.823749205 | no |
| HES3     | 0.011428893  | 0.301751146  | 0.762931784 | 0.823749205 | no |
| OR4C12   | -0.011427485 | -0.301713969 | 0.762960116 | 0.823749205 | no |
| ZNF575   | 0.011418867  | 0.301486385  | 0.763133555 | 0.823892466 | no |
| RPL21P44 | -0.011416581 | -0.301426044 | 0.763179542 | 0.823898119 | no |
| FAM138E  | -0.011410568 | -0.301267247 | 0.763300568 | 0.823984777 | no |
| GABRA6   | -0.011402302 | -0.301048984 | 0.763466926 | 0.824120358 | no |
| ACSM2B   | -0.011393575 | -0.300818528 | 0.763642589 | 0.824265969 | no |
| PIGH     | -0.011390964 | -0.300749592 | 0.763695137 | 0.824278683 | no |
| SIRPB1   | 0.011385655  | 0.3006094    | 0.763802006 | 0.824350022 | no |
| OR2A2    | 0.011373657  | 0.300292586  | 0.764043529 | 0.824559115 | no |
| RBMY1F   | -0.011371979 | -0.30024828  | 0.764077308 | 0.824559115 | no |
| CDC7     | 0.011359591  | 0.299921172  | 0.764326707 | 0.824784232 | no |
| 9-Mar    | -0.011356831 | -0.299848281 | 0.764382285 | 0.824800183 | no |
| KBTBD3   | 0.011348373  | 0.299624941  | 0.764552585 | 0.824939917 | no |
| OR11G2   | -0.011343004 | -0.29948316  | 0.764660701 | 0.825002508 | no |
| DAZ3     | -0.011339991 | -0.299403615 | 0.76472136  | 0.825002508 | no |
| CAP2     | -0.011339413 | -0.299388339 | 0.76473301  | 0.825002508 | no |
| NUP43    | -0.011330414 | -0.299150708 | 0.764914233 | 0.825119721 | no |
| GPER     | 0.011329964  | 0.299138842  | 0.764923282 | 0.825119721 | no |
| ZNF773   | -0.011320718 | -0.298894689 | 0.765109493 | 0.825276554 | no |
| ARR3     | -0.011311038 | -0.298639082 | 0.765304454 | 0.825442809 | no |
| C2orf16  | 0.011280078  | 0.297821559  | 0.765928109 | 0.826071402 | no |
| RABGEF1  | 0.011277004  | 0.297740389  | 0.765990039 | 0.826094127 | no |
| C8orf37  | 0.011261756  | 0.297337749  | 0.76629726  | 0.826381374 | no |
| LOC90784 | -0.01125155  | -0.297068248 | 0.766502914 | 0.826559065 | no |
| NEURL1B  | 0.011242221  | 0.29682192   | 0.766690899 | 0.826717685 | no |
| C12orf57 | 0.011238856  | 0.296733057  | 0.766758718 | 0.826746721 | no |
| PPP1R2P1 | 0.011219069  | 0.296210564  | 0.767157516 | 0.827132608 | no |
| ZAN      | -0.011206549 | -0.29587996  | 0.767409884 | 0.827360585 | no |
| GJA1     | 0.011200497  | 0.295720147  | 0.767531888 | 0.827437164 | no |
| AWAT1    | 0.011198965  | 0.2956797    | 0.767562766 | 0.827437164 | no |
| OPRL1    | -0.01119378  | -0.295542788 | 0.767667292 | 0.827485753 | no |
| FLJ36000 | -0.011192669 | -0.295513443 | 0.767689696 | 0.827485753 | no |
| TAS2R8   | -0.011189961 | -0.295441953 | 0.767744278 | 0.827500469 | no |
| CHRM5    | 0.011162993  | 0.29472984   | 0.768288027 | 0.828039718 | no |
| APTX     | 0.011161085  | 0.294679464  | 0.768326497 | 0.828039718 | no |
| OTOP3    | -0.011157949 | -0.294596647 | 0.768389742 | 0.828051573 | no |
| KCND1    | 0.011156478  | 0.2945578    | 0.768419409 | 0.828051573 | no |
| BARX2    | 0.01113364   | 0.29395476   | 0.768879986 | 0.828503734 | no |
| C6orf223 | -0.011130723 | -0.293877736 | 0.76893882  | 0.828522973 | no |
| CNTN2    | -0.011121414 | -0.293631927 | 0.769126587 | 0.82864386  | no |
| LEFTY1   | -0.011121097 | -0.293623553 | 0.769132984 | 0.82864386  | no |
| URM1     | 0.011096799  | 0.29298195   | 0.769623151 | 0.829122818 | no |

|              |              |              |             |             |    |
|--------------|--------------|--------------|-------------|-------------|----|
| C13orf37     | 0.011094995  | 0.292934294  | 0.769659563 | 0.829122818 | no |
| LOC389033    | 0.011090234  | 0.292808575  | 0.769755621 | 0.829182117 | no |
| BTBD16       | -0.011082571 | -0.292606232 | 0.769910233 | 0.82930448  | no |
| ESPN         | 0.011077534  | 0.29247324   | 0.770011858 | 0.829367879 | no |
| C19orf43     | -0.011074599 | -0.292395745 | 0.770071077 | 0.829367879 | no |
| ZBTB7A       | -0.011073555 | -0.292368163 | 0.770092155 | 0.829367879 | no |
| TBC1D15      | 0.011065755  | 0.292162201  | 0.770249552 | 0.829493205 | no |
| LOC100128191 | -0.011057405 | -0.291941724 | 0.770418052 | 0.829630476 | no |
| STAG3L1      | 0.011046914  | 0.291664689  | 0.770629793 | 0.829794251 | no |
| HP1BP3       | 0.011045802  | 0.291635342  | 0.770652224 | 0.829794251 | no |
| KCNMB4       | 0.011028792  | 0.291186178  | 0.770995563 | 0.83011973  | no |
| OR5D18       | -0.011026555 | -0.291127098 | 0.771040727 | 0.83012415  | no |
| MRPL53       | 0.01102041   | 0.290964842  | 0.771164768 | 0.830189053 | no |
| ARMCX6       | 0.0110195    | 0.290940819  | 0.771183134 | 0.830189053 | no |
| METTL11B     | 0.01101585   | 0.290844432  | 0.771256823 | 0.830224175 | no |
| SLC13A4      | -0.011012219 | -0.290748551 | 0.771330127 | 0.830258878 | no |
| CPN1         | -0.011008668 | -0.290654798 | 0.771401806 | 0.830291829 | no |
| OR5AS1       | -0.010993576 | -0.290256264 | 0.771706529 | 0.830575598 | no |
| UPK1B        | -0.010968941 | -0.289605775 | 0.772203975 | 0.831037489 | no |
| ADAM30       | -0.010968252 | -0.28958758  | 0.77221789  | 0.831037489 | no |
| PDXDC1       | -0.010960861 | -0.28939243  | 0.772367146 | 0.831153872 | no |
| PCDHGA3      | 0.010944103  | 0.288949926  | 0.772705615 | 0.831473848 | no |
| OR2T11       | -0.010939589 | -0.288830732 | 0.772796793 | 0.831527704 | no |
| PRB4         | 0.010936759  | 0.288755998  | 0.772853963 | 0.831544964 | no |
| ZNF750       | -0.010926562 | -0.288486738 | 0.773059951 | 0.831722333 | no |
| C20orf107    | 0.010901527  | 0.287825684  | 0.773565736 | 0.832222213 | no |
| LOC150185    | 0.010899271  | 0.287766102  | 0.773611328 | 0.832226978 | no |
| MRGPRD       | 0.010891654  | 0.287564961  | 0.773765246 | 0.832310949 | no |
| OR14J1       | -0.01089016  | -0.287525517 | 0.773795431 | 0.832310949 | no |
| TGM6         | -0.010889296 | -0.28750271  | 0.773812885 | 0.832310949 | no |
| PRAMEF1      | 0.01088267   | 0.287327739  | 0.773946787 | 0.832400628 | no |
| FTLP10       | -0.010881095 | -0.287286165 | 0.773978604 | 0.832400628 | no |
| DEFB110      | -0.010874551 | -0.287113371 | 0.774110848 | 0.83249857  | no |
| LRP5L        | 0.010869154  | 0.286970858  | 0.774219922 | 0.832571586 | no |
| ZNF747       | -0.01085425  | -0.2865773   | 0.774521161 | 0.83285123  | no |
| NDUFA7       | -0.010844014 | -0.286307024 | 0.774728056 | 0.833029401 | no |
| TSSK1B       | -0.010833711 | -0.286034952 | 0.774936342 | 0.833202663 | no |
| LMX1B        | -0.010831966 | -0.285988882 | 0.774971613 | 0.833202663 | no |
| GSTT2        | -0.010819256 | -0.285653273 | 0.775228566 | 0.833434603 | no |
| SNORA4       | 0.010807167  | 0.28533405   | 0.775472996 | 0.833653057 | no |
| NR2F6        | 0.010797021  | 0.285066163  | 0.775678136 | 0.833787021 | no |
| CDRT1        | 0.010796925  | 0.28506361   | 0.775680091 | 0.833787021 | no |
| CLCA4        | -0.010782567 | -0.284684492 | 0.775970434 | 0.834054771 | no |
| MEAF6        | 0.010774876  | 0.284481391  | 0.77612599  | 0.834177623 | no |
| LOC401093    | -0.010771164 | -0.284383392 | 0.776201051 | 0.834213951 | no |
| MYH8         | -0.010755824 | -0.283978326 | 0.776511328 | 0.834503058 | no |
| LCE6A        | -0.010753613 | -0.283919947 | 0.776556049 | 0.834506761 | no |
| BUB1B        | 0.010743035  | 0.283640629  | 0.776770028 | 0.834692343 | no |
| T            | 0.010734473  | 0.283414536  | 0.776943246 | 0.834834106 | no |
| SUN2         | -0.010714782 | -0.282894599 | 0.777341628 | 0.835196164 | no |
| IRX1         | -0.010713735 | -0.282866949 | 0.777362816 | 0.835196164 | no |

|           |              |              |             |             |    |
|-----------|--------------|--------------|-------------|-------------|----|
| LOC340357 | 0.010710735  | 0.282787737  | 0.777423515 | 0.835216995 | no |
| GHSR      | 0.010703806  | 0.282604787  | 0.777563712 | 0.835323227 | no |
| FAM58A    | -0.010697437 | -0.282436614 | 0.777692592 | 0.835417291 | no |
| E2F2      | -0.010685409 | -0.282119003 | 0.777936011 | 0.835634378 | no |
| CCT2      | 0.010681661  | 0.282020032  | 0.778011867 | 0.835644098 | no |
| VSX1      | 0.010680878  | 0.281999345  | 0.778027722 | 0.835644098 | no |
| TGIF2LY   | 0.010654897  | 0.281313312  | 0.778553594 | 0.836164492 | no |
| SLC25A14  | -0.010640671 | -0.280937678 | 0.778841574 | 0.836390305 | no |
| OR8K5     | -0.010640423 | -0.280931142 | 0.778846586 | 0.836390305 | no |
| FXYP4     | -0.010629743 | -0.280649113 | 0.779062825 | 0.836578085 | no |
| KIFC1     | 0.010624356  | 0.280506877  | 0.779171887 | 0.83661127  | no |
| KIF2B     | 0.010624129  | 0.280500878  | 0.779176487 | 0.83661127  | no |
| OR6C4     | -0.010614761 | -0.280253525 | 0.779366161 | 0.836750492 | no |
| TAS2R30   | -0.010613637 | -0.280223841 | 0.779388924 | 0.836750492 | no |
| PDHA2     | -0.010599663 | -0.27985485  | 0.779671899 | 0.837009847 | no |
| PDE6A     | -0.010596855 | -0.2797807   | 0.779728767 | 0.837026452 | no |
| PRSS12    | -0.0105886   | -0.279562732 | 0.779895941 | 0.837161462 | no |
| MIOX      | 0.010573138  | 0.279154468  | 0.780209093 | 0.837453145 | no |
| FKSG83    | -0.010559419 | -0.278792194 | 0.780487    | 0.837706968 | no |
| GLYATL2   | 0.010549982  | 0.278543015  | 0.780678165 | 0.837867669 | no |
| NF1P1     | -0.01053793  | -0.278224789 | 0.780922322 | 0.838085222 | no |
| C14orf180 | -0.010535188 | -0.278152385 | 0.780977876 | 0.838100356 | no |
| KRTAP9-9  | 0.010531724  | 0.278060913  | 0.781048063 | 0.838131189 | no |
| ACAD9     | -0.010514986 | -0.277618942 | 0.781387213 | 0.838450625 | no |
| SLC1A7    | -0.010504901 | -0.277352655 | 0.781591571 | 0.83858201  | no |
| TFF2      | -0.01050485  | -0.277351301 | 0.78159261  | 0.83858201  | no |
| CCDC13    | 0.010502208  | 0.27728153   | 0.781646157 | 0.838594959 | no |
| OR7C2     | -0.010497252 | -0.277150688 | 0.781746577 | 0.838614138 | no |
| GBAP1     | -0.010497232 | -0.27715015  | 0.78174699  | 0.838614138 | no |
| C17orf65  | 0.010490482  | 0.276971911  | 0.781883793 | 0.83871639  | no |
| SERPINA11 | 0.01045731   | 0.276096006  | 0.78255617  | 0.839393105 | no |
| SH2D7     | 0.010450579  | 0.275918277  | 0.782692621 | 0.83949493  | no |
| TTLL4     | 0.010445161  | 0.275775209  | 0.782802466 | 0.839568207 | no |
| LYG1      | 0.010442584  | 0.275707165  | 0.782854711 | 0.839579703 | no |
| OR7G2     | 0.010434929  | 0.275505018  | 0.783009927 | 0.839664296 | no |
| LOC653544 | 0.010434597  | 0.275496262  | 0.78301665  | 0.839664296 | no |
| CCDC51    | 0.010428402  | 0.275332698  | 0.783142247 | 0.839710573 | no |
| MRGPRX4   | 0.010428372  | 0.275331884  | 0.783142871 | 0.839710573 | no |
| GOLGA2P3  | -0.010413266 | -0.274933024 | 0.78344917  | 0.839932011 | no |
| C7orf40   | -0.010411892 | -0.274896726 | 0.783477046 | 0.839932011 | no |
| CYCSP52   | 0.01041166   | 0.27489061   | 0.783481743 | 0.839932011 | no |
| EIF4H     | -0.010408494 | -0.274807022 | 0.783545938 | 0.839932011 | no |
| CCDC137   | 0.010407164  | 0.274771902  | 0.783572911 | 0.839932011 | no |
| SCGB3A2   | -0.010405895 | -0.274738382 | 0.783598655 | 0.839932011 | no |
| OR6C75    | -0.010402382 | -0.274645628 | 0.783669892 | 0.839941858 | no |
| CYP11B1   | 0.010401345  | 0.274618237  | 0.783690929 | 0.839941858 | no |
| OR2W1     | -0.010394907 | -0.274448244 | 0.783821494 | 0.840037263 | no |
| ATP5L2    | -0.010386968 | -0.274238621 | 0.783982506 | 0.840165287 | no |
| CXCL17    | -0.010357622 | -0.273463736 | 0.784577777 | 0.840758652 | no |
| OR11L1    | 0.010354038  | 0.273369089  | 0.784650493 | 0.840792011 | no |
| GADL1     | 0.010347298  | 0.273191144  | 0.784787213 | 0.840893946 | no |

|           |              |              |             |             |    |
|-----------|--------------|--------------|-------------|-------------|----|
| ASB16     | -0.010330524 | -0.272748205 | 0.785127562 | 0.841214046 | no |
| ECHS1     | -0.010321271 | -0.272503882 | 0.785315315 | 0.841370624 | no |
| C4orf27   | -0.010310026 | -0.272206967 | 0.7855435   | 0.841492288 | no |
| SNX18     | -0.01030702  | -0.272127584 | 0.785604511 | 0.841492288 | no |
| ARL4D     | -0.010306668 | -0.272118288 | 0.785611656 | 0.841492288 | no |
| RCE1      | 0.010306112  | 0.272103627  | 0.785622923 | 0.841492288 | no |
| OPN5      | -0.01030542  | -0.27208534  | 0.785636978 | 0.841492288 | no |
| TREH      | -0.010298829 | -0.27191131  | 0.785770736 | 0.84159097  | no |
| PDE4B     | 0.010295406  | 0.27182092   | 0.785840213 | 0.841620798 | no |
| IMMP1L    | 0.010292486  | 0.271743812  | 0.785899481 | 0.84163969  | no |
| HMBOX1    | -0.010287146 | -0.271602811 | 0.786007863 | 0.841705921 | no |
| NNAT      | 0.010282661  | 0.271484394  | 0.786098889 | 0.841705921 | no |
| TUSC2     | -0.01028209  | -0.271469328 | 0.78611047  | 0.841705921 | no |
| MB        | 0.010281234  | 0.271446717  | 0.786127851 | 0.841705921 | no |
| LRRC52    | -0.010278777 | -0.271381824 | 0.786177735 | 0.841714756 | no |
| IFNA5     | 0.010269016  | 0.271124095  | 0.786375865 | 0.8418823   | no |
| C5orf55   | -0.010260562 | -0.270900858 | 0.786547489 | 0.842021452 | no |
| GPX2      | -0.010255494 | -0.270767049 | 0.786650366 | 0.842086996 | no |
| OR8G2     | -0.010241823 | -0.270406072 | 0.786927917 | 0.842339508 | no |
| MKX       | -0.010238971 | -0.270330754 | 0.786985832 | 0.842356903 | no |
| RFXANK    | 0.010236366  | 0.270261973  | 0.787038721 | 0.842368918 | no |
| ACTL7A    | 0.010231243  | 0.270126714  | 0.787142731 | 0.842373803 | no |
| CTU1      | 0.010229576  | 0.270082687  | 0.787176587 | 0.842373803 | no |
| POP1      | -0.010229512 | -0.270081008 | 0.787177879 | 0.842373803 | no |
| KIAA1632  | -0.010227933 | -0.270039312 | 0.787209943 | 0.842373803 | no |
| KIAA1324  | -0.01022569  | -0.269980081 | 0.787255492 | 0.842377959 | no |
| FLJ44082  | 0.010214127  | 0.269674749  | 0.787490306 | 0.84258117  | no |
| MKI67IP   | 0.010210651  | 0.269582963  | 0.787560898 | 0.84258117  | no |
| REG3A     | -0.010210181 | -0.269570569 | 0.78757043  | 0.84258117  | no |
| SAA3P     | -0.010206317 | -0.269468534 | 0.787648907 | 0.842620541 | no |
| OR51V1    | -0.010176409 | -0.268678809 | 0.788256365 | 0.843225778 | no |
| EPO       | -0.010171237 | -0.26854226  | 0.788361412 | 0.843270812 | no |
| STON1     | -0.01017023  | -0.268515652 | 0.788381882 | 0.843270812 | no |
| PAX7      | 0.01013601   | 0.267612088  | 0.789077095 | 0.843969777 | no |
| EI24      | 0.010122287  | 0.267249736  | 0.78935594  | 0.844188755 | no |
| EXOC1     | 0.010121824  | 0.267237524  | 0.789365338 | 0.844188755 | no |
| LOC220429 | 0.010096111  | 0.266558576  | 0.789887892 | 0.84470292  | no |
| BSX       | 0.010085628  | 0.266281767  | 0.790100966 | 0.844873568 | no |
| GAS1      | 0.010084148  | 0.266242695  | 0.790131043 | 0.844873568 | no |
| ZNF573    | -0.010080192 | -0.26613824  | 0.790211452 | 0.844914863 | no |
| COL2A1    | -0.010072291 | -0.265929593 | 0.790372074 | 0.845041914 | no |
| OR10AG1   | -0.010052141 | -0.265397538 | 0.790781707 | 0.845399132 | no |
| ROCK2     | 0.010051742  | 0.265387014  | 0.79078981  | 0.845399132 | no |
| CLDN3     | -0.010039213 | -0.265056185 | 0.791044547 | 0.845626746 | no |
| PCP4      | 0.010033012  | 0.264892446  | 0.791170633 | 0.845716816 | no |
| CFHR5     | 0.010027206  | 0.264739143  | 0.791288689 | 0.845798293 | no |
| KIAA0467  | 0.010024091  | 0.264656885  | 0.791352036 | 0.845821287 | no |
| B4GALNT2  | 0.010007042  | 0.264206708  | 0.791698743 | 0.846147127 | no |
| FAM71F2   | -0.01000302  | -0.264100528 | 0.791780525 | 0.846189801 | no |
| PYCR2     | 0.010000718  | 0.264039728  | 0.791827355 | 0.846195119 | no |
| SNORA70B  | 0.009991296  | 0.263790953  | 0.792018976 | 0.846355162 | no |

|              |              |              |             |             |    |
|--------------|--------------|--------------|-------------|-------------|----|
| LDLRAD1      | 0.009980955  | 0.263517901  | 0.792229313 | 0.846506635 | no |
| XRR1A1       | 0.00998021   | 0.263498235  | 0.792244463 | 0.846506635 | no |
| KIF18B       | -0.009977688 | -0.263431643 | 0.792295762 | 0.846516711 | no |
| OTUD1        | 0.009968027  | 0.263176547  | 0.792492284 | 0.846681939 | no |
| SFTPA1       | 0.009959061  | 0.262939807  | 0.792674677 | 0.846832054 | no |
| TESK2        | -0.00994028  | -0.26244389  | 0.793056788 | 0.84719078  | no |
| GML          | 0.009938438  | 0.262395251  | 0.793094267 | 0.84719078  | no |
| HPYR1        | -0.009926619 | -0.262083173 | 0.793334755 | 0.847402899 | no |
| PCMTD1       | 0.00991353   | 0.261737552  | 0.793601114 | 0.847627417 | no |
| OR10A7       | -0.009912169 | -0.261701635 | 0.793628796 | 0.847627417 | no |
| C3orf63      | -0.009895655 | -0.261265586 | 0.793964883 | 0.847941577 | no |
| SNAR-G1      | -0.009855365 | -0.260201741 | 0.794785008 | 0.848772623 | no |
| KRT9         | 0.009848993  | 0.260033494  | 0.794914731 | 0.84886632  | no |
| SSX5         | 0.009845959  | 0.259953384  | 0.794976501 | 0.848887446 | no |
| SDHAF1       | -0.009842676 | -0.259866701 | 0.79504334  | 0.848913981 | no |
| NOS1         | 0.00983775   | 0.259736635  | 0.795143633 | 0.848962552 | no |
| LRRC57       | -0.009836318 | -0.259698799 | 0.795172808 | 0.848962552 | no |
| C6orf126     | 0.009799503  | 0.258726737  | 0.795922474 | 0.849686183 | no |
| MAT2A        | 0.009798906  | 0.25871096   | 0.795934643 | 0.849686183 | no |
| MLN          | -0.009794572 | -0.258596528 | 0.796022907 | 0.84973554  | no |
| GLYATL3      | -0.009781243 | -0.258244567 | 0.796294399 | 0.849967142 | no |
| OR2T2        | -0.009779445 | -0.258197103 | 0.796331014 | 0.849967142 | no |
| C2orf49      | -0.009777728 | -0.258151763 | 0.796365989 | 0.849967142 | no |
| INPP4A       | 0.009774561  | 0.258068149  | 0.796430492 | 0.849991115 | no |
| CST9L        | -0.009771627 | -0.257990677 | 0.796490258 | 0.850010031 | no |
| SLC19A2      | -0.009766011 | -0.257842393 | 0.796604655 | 0.850087243 | no |
| ZNF814       | -0.009758434 | -0.257642313 | 0.796759017 | 0.850207094 | no |
| ZDHHC8P1     | 0.009756193  | 0.257583143  | 0.796804669 | 0.850210935 | no |
| AKR1C1       | -0.009748322 | -0.257375327 | 0.796965011 | 0.850337147 | no |
| C20orf85     | -0.009741352 | -0.257191283 | 0.797107019 | 0.850406117 | no |
| TAAR2        | -0.009741021 | -0.257182525 | 0.797113776 | 0.850406117 | no |
| OR6C76       | 0.009726255  | 0.256792656  | 0.797414621 | 0.850682187 | no |
| IGF2AS       | -0.009720475 | -0.256640024 | 0.797532408 | 0.850762952 | no |
| FLJ13197     | -0.009715144 | -0.256499255 | 0.797641046 | 0.850833948 | no |
| ZNF486       | 0.009693601  | 0.255930426  | 0.798080073 | 0.851257342 | no |
| OR8K1        | 0.009690542  | 0.255849672  | 0.798142404 | 0.851278916 | no |
| MSGN1        | 0.009680481  | 0.255584021  | 0.798347463 | 0.851426311 | no |
| PNMT         | -0.00967963  | -0.255561531 | 0.798364823 | 0.851426311 | no |
| DKFZP434K028 | -0.009674179 | -0.25541761  | 0.798475924 | 0.85149988  | no |
| BANP         | -0.009665462 | -0.255187452 | 0.798653603 | 0.851644438 | no |
| DAZAP1       | 0.009648029  | 0.254727128  | 0.799008999 | 0.851978479 | no |
| C5orf23      | 0.009629898  | 0.254248392  | 0.799378655 | 0.85232769  | no |
| HYAL3        | 0.009621205  | 0.254018858  | 0.799555906 | 0.852471724 | no |
| TAS2R42      | -0.009611247 | -0.253755926 | 0.79975896  | 0.852633644 | no |
| PRSS45       | -0.009609621 | -0.25371299  | 0.799792119 | 0.852633644 | no |
| KRT78        | -0.00960083  | -0.253480875 | 0.799971387 | 0.85277979  | no |
| TCL1B        | 0.009584586  | 0.253051964  | 0.800302673 | 0.853046679 | no |
| OR51I1       | 0.009584417  | 0.253047485  | 0.800306133 | 0.853046679 | no |
| KRTAP19-3    | -0.009574444 | -0.252784151 | 0.800509547 | 0.853218516 | no |
| C1orf58      | 0.009568655  | 0.252631294  | 0.800627629 | 0.853299389 | no |
| C15orf60     | 0.009558562  | 0.252364811  | 0.800833498 | 0.853464475 | no |

|              |              |              |             |             |    |
|--------------|--------------|--------------|-------------|-------------|----|
| RPSAP58      | -0.009556922 | -0.252321509 | 0.800866951 | 0.853464475 | no |
| CTSL3        | 0.009551693  | 0.252183446  | 0.800973618 | 0.853533158 | no |
| FAM75A5      | 0.009541305  | 0.25190915   | 0.801185546 | 0.853713996 | no |
| HIST1H2BA    | 0.009524281  | 0.251459627  | 0.801532892 | 0.854000802 | no |
| LFNG         | -0.009523972 | -0.251451484 | 0.801539184 | 0.854000802 | no |
| KRTAP5-9     | -0.009521545 | -0.251387405 | 0.801588701 | 0.854008556 | no |
| TBX5         | -0.009506454 | -0.250988917 | 0.801896651 | 0.854291626 | no |
| LOC100129935 | -0.009474365 | -0.25014163  | 0.802551533 | 0.854906182 | no |
| ADAD1        | -0.009474044 | -0.250133155 | 0.802558084 | 0.854906182 | no |
| ALPP         | 0.009471591  | 0.250068405  | 0.802608136 | 0.854914456 | no |
| RPH3AL       | 0.009453002  | 0.249577567  | 0.802987582 | 0.855273572 | no |
| ALAD         | 0.009450917  | 0.24952251   | 0.803030148 | 0.855273852 | no |
| LOC158572    | -0.00944221  | -0.249292609 | 0.803207894 | 0.855418099 | no |
| MYH11        | 0.009420621  | 0.24872256   | 0.803648665 | 0.855811513 | no |
| THOC2        | -0.00941997  | -0.248705375 | 0.803661954 | 0.855811513 | no |
| PRO1768      | -0.009414984 | -0.248573718 | 0.803763762 | 0.855874848 | no |
| SHB          | 0.009411672  | 0.248486274  | 0.803831384 | 0.855887334 | no |
| PHF7         | -0.009410263 | -0.248449071 | 0.803860154 | 0.855887334 | no |
| FLJ43860     | -0.00940113  | -0.248207927 | 0.804046642 | 0.856040811 | no |
| ZRANB2       | 0.009391834  | 0.247962479  | 0.80423647  | 0.856197828 | no |
| EIF3B        | 0.009383801  | 0.247750366  | 0.804400526 | 0.856327392 | no |
| C9orf144B    | 0.009379537  | 0.24763778   | 0.804487608 | 0.856356469 | no |
| TUBG1        | 0.009378316  | 0.247605531  | 0.804512552 | 0.856356469 | no |
| RUNDC2A      | 0.009375019  | 0.247518491  | 0.804579877 | 0.856383046 | no |
| TCAM1P       | 0.009357361  | 0.247052235  | 0.804940548 | 0.856721837 | no |
| HDGFL1       | -0.009349456 | -0.246843503 | 0.805102026 | 0.856848595 | no |
| LOC441601    | -0.009317557 | -0.24600125  | 0.805753688 | 0.857497003 | no |
| TAS2R41      | -0.009297569 | -0.245473464 | 0.806162112 | 0.857886498 | no |
| CISD3        | 0.009291961  | 0.245325396  | 0.806276703 | 0.857933264 | no |
| HTN3         | -0.009291265 | -0.245307018 | 0.806290927 | 0.857933264 | no |
| LPPR4        | -0.009283983 | -0.245114761 | 0.806439723 | 0.858046433 | no |
| DAZ1         | -0.009277944 | -0.244955302 | 0.80656314  | 0.858100563 | no |
| TRAPPC2L     | -0.00927734  | -0.244939356 | 0.806575482 | 0.858100563 | no |
| CDK5RAP2     | -0.009270851 | -0.244767999 | 0.806708115 | 0.858164686 | no |
| DHDH         | 0.009270237  | 0.244751809  | 0.806720646 | 0.858164686 | no |
| DCAF12L1     | -0.009254921 | -0.244347401 | 0.807033686 | 0.85845252  | no |
| C11orf80     | -0.009243842 | -0.24405485  | 0.80726016  | 0.858648249 | no |
| RG9MTD2      | -0.009230424 | -0.243700556 | 0.807534453 | 0.858894816 | no |
| TBCB         | 0.009218921  | 0.243396852  | 0.807769599 | 0.859077333 | no |
| RPP14        | 0.009217873  | 0.243369164  | 0.807791037 | 0.859077333 | no |
| C17orf55     | 0.009206188  | 0.243060625  | 0.808029945 | 0.859286211 | no |
| SLC01B1      | -0.009195526 | -0.242779126 | 0.808247932 | 0.859472818 | no |
| MPG          | 0.009191987  | 0.242685682  | 0.808320296 | 0.859504562 | no |
| HKDC1        | 0.009188103  | 0.242583108  | 0.808399733 | 0.859543823 | no |
| CHAF1A       | 0.009175471  | 0.242249585  | 0.808658036 | 0.859773253 | no |
| DSPP         | 0.009170715  | 0.242124005  | 0.808755301 | 0.85981631  | no |
| SERPINB4     | -0.009169332 | -0.242087482 | 0.808783589 | 0.85981631  | no |
| MED15        | 0.009162026  | 0.241894573  | 0.808933007 | 0.859897471 | no |
| OR5F1        | -0.00916144  | -0.241879096 | 0.808944995 | 0.859897471 | no |
| SGPL1        | 0.009157946  | 0.241786861  | 0.809016438 | 0.859928203 | no |
| RBMXL3       | -0.009133464 | -0.241140436 | 0.809517192 | 0.860370357 | no |

|            |              |              |             |             |    |
|------------|--------------|--------------|-------------|-------------|----|
| ZNF615     | 0.009133448  | 0.241140007  | 0.809517524 | 0.860370357 | no |
| C17orf54   | 0.009117636  | 0.240722495  | 0.809840992 | 0.860668901 | no |
| NDUFV2     | 0.009105228  | 0.240394893  | 0.810094825 | 0.860893412 | no |
| AGTR2      | -0.009091553 | -0.240033819 | 0.810374615 | 0.861145483 | no |
| SNORA65    | -0.009084723 | -0.239853478 | 0.810514367 | 0.861248724 | no |
| HSP90AB4P  | -0.009068275 | -0.239419187 | 0.81085094  | 0.861561083 | no |
| RNASE9     | 0.009065484  | 0.239345487  | 0.81090806  | 0.861576496 | no |
| OR52N2     | -0.009055567 | -0.239083622 | 0.811111023 | 0.861746856 | no |
| NPVF       | -0.009049821 | -0.238931912 | 0.811228615 | 0.861826501 | no |
| PCDHB11    | -0.009043532 | -0.238765872 | 0.811357319 | 0.861854351 | no |
| RBAK       | 0.009043222  | 0.238757679  | 0.81136367  | 0.861854351 | no |
| GKN2       | -0.009042292 | -0.23873311  | 0.811382714 | 0.861854351 | no |
| NPHP3      | 0.009032862  | 0.238484131  | 0.811575719 | 0.862014074 | no |
| C6orf192   | -0.009028349 | -0.238364961 | 0.811668102 | 0.862066909 | no |
| KRT15      | -0.009012037 | -0.237934269 | 0.812002003 | 0.862353741 | no |
| DPYSL5     | 0.009010988  | 0.23790658   | 0.81202347  | 0.862353741 | no |
| CGGBP1     | 0.009006279  | 0.237782238  | 0.812119876 | 0.862410823 | no |
| MED20      | -0.009000351 | -0.237709115 | 0.812176571 | 0.862425731 | no |
| PAICS      | 0.008989312  | 0.237334241  | 0.812467242 | 0.862689076 | no |
| OR7D2      | -0.008980363 | -0.237097951 | 0.812650471 | 0.862834915 | no |
| TTY2       | -0.008976623 | -0.236999209 | 0.812727042 | 0.862834915 | no |
| ANKRD13D   | 0.008975223  | 0.23696223   | 0.812755719 | 0.862834915 | no |
| KLHDC7A    | 0.008974267  | 0.236936984  | 0.812775297 | 0.862834915 | no |
| OR6C70     | 0.008965951  | 0.23671741   | 0.812945579 | 0.862970373 | no |
| ERMP1      | 0.008958303  | 0.236515487  | 0.813102181 | 0.863091295 | no |
| KLK9       | -0.00895369  | -0.236393676 | 0.813196654 | 0.863110111 | no |
| HSFX1      | -0.008950665 | -0.236313804 | 0.813258603 | 0.863110111 | no |
| KRTAP19-4  | -0.008950665 | -0.236313804 | 0.813258603 | 0.863110111 | no |
| HTR3D      | 0.008949099  | 0.236272463  | 0.813290668 | 0.863110111 | no |
| SMTNL2     | -0.008941373 | -0.236068446 | 0.81344891  | 0.863232734 | no |
| GH1        | 0.008934799  | 0.235894887  | 0.813583533 | 0.863330283 | no |
| CYP4A22    | -0.008931997 | -0.2358209   | 0.813640925 | 0.863331339 | no |
| DIXDC1     | -0.008930581 | -0.235783507 | 0.813669931 | 0.863331339 | no |
| DRD3       | 0.008918013  | 0.235451671  | 0.813927346 | 0.863559146 | no |
| RPL36      | -0.008912993 | -0.23531911  | 0.814030184 | 0.863622935 | no |
| DCUN1D1    | -0.008909599 | -0.235229511 | 0.814099695 | 0.863651361 | no |
| MAGEA2     | -0.008906539 | -0.235148697 | 0.814162391 | 0.863672555 | no |
| PHF8       | 0.008903098  | 0.235057844  | 0.814232877 | 0.86370201  | no |
| C20orf114  | -0.00889054  | -0.234726278 | 0.814490128 | 0.863929563 | no |
| SPATA19    | -0.008887568 | -0.234647798 | 0.814551021 | 0.863948827 | no |
| PRAMEF8    | 0.008869293  | 0.234165261  | 0.814925447 | 0.86428187  | no |
| NME3       | 0.008864914  | 0.234049631  | 0.815015178 | 0.86428187  | no |
| OVCH1      | 0.008864593  | 0.234041162  | 0.81502175  | 0.86428187  | no |
| GPR176     | 0.008858593  | 0.233882749  | 0.815144684 | 0.86428187  | no |
| ACTR10     | -0.008856627 | -0.23383084  | 0.815184968 | 0.86428187  | no |
| ZNF627     | -0.008852198 | -0.233713898 | 0.815275723 | 0.86428187  | no |
| N4BP1      | 0.008851796  | 0.233703266  | 0.815283975 | 0.86428187  | no |
| C21orf67   | 0.008851032  | 0.2336831    | 0.815299625 | 0.86428187  | no |
| OR5P3      | 0.008849764  | 0.233649624  | 0.815325605 | 0.86428187  | no |
| GABRR2     | 0.008848428  | 0.233614338  | 0.815352991 | 0.86428187  | no |
| NCRNA00052 | 0.008848093  | 0.233605503  | 0.815359847 | 0.86428187  | no |

|              |              |              |             |             |    |
|--------------|--------------|--------------|-------------|-------------|----|
| LM07         | -0.008847207 | -0.233582114 | 0.815377999 | 0.86428187  | no |
| MRPL52       | -0.008831494 | -0.233167232 | 0.815700007 | 0.864577864 | no |
| SERPINB5     | -0.008828749 | -0.233094749 | 0.815756268 | 0.864592169 | no |
| ST18         | -0.008820078 | -0.232865792 | 0.815933987 | 0.864735197 | no |
| NET02        | 0.008815531  | 0.232745742  | 0.816027175 | 0.864788627 | no |
| LEUTX        | -0.008812655 | -0.23266981  | 0.816086118 | 0.864805762 | no |
| SAAL1        | 0.008800853  | 0.23235819   | 0.816328028 | 0.865016775 | no |
| SNORA20      | 0.008797136  | 0.232260049  | 0.816404218 | 0.865052171 | no |
| DMRT3        | 0.008788001  | 0.232018856  | 0.816591472 | 0.86520524  | no |
| FAM57A       | -0.00878011  | -0.231810501 | 0.81675324  | 0.86533129  | no |
| TBC1D3P2     | 0.008777595  | 0.231744096  | 0.8168048   | 0.86534057  | no |
| WFDC13       | 0.008774681  | 0.231667146  | 0.816864547 | 0.865358523 | no |
| CCDC90A      | -0.008764781 | -0.231405746 | 0.817067517 | 0.865528191 | no |
| CDX2         | -0.008744371 | -0.230866835 | 0.817486006 | 0.865914113 | no |
| ACSM5        | -0.008742835 | -0.230826295 | 0.817517489 | 0.865914113 | no |
| ZNF3970S     | -0.008730576 | -0.230502607 | 0.817768876 | 0.866135006 | no |
| NINL         | -0.008722925 | -0.230300586 | 0.817925781 | 0.86624173  | no |
| BEST2        | 0.008721484  | 0.230262541  | 0.81795533  | 0.86624173  | no |
| LEPROTL1     | -0.008706785 | -0.229874427 | 0.818256793 | 0.8665156   | no |
| BPY2         | -0.008694632 | -0.229553561 | 0.818506042 | 0.866734152 | no |
| PCDHB4       | -0.008678782 | -0.229135045 | 0.818831173 | 0.867026596 | no |
| ALKBH1       | -0.008676987 | -0.229087667 | 0.818867982 | 0.867026596 | no |
| KRT79        | 0.008673245  | 0.228988857  | 0.818944749 | 0.867052207 | no |
| PTCH2        | 0.008671138  | 0.228933211  | 0.818987983 | 0.867052207 | no |
| LOC286135    | -0.008669537 | -0.228890939 | 0.819020825 | 0.867052207 | no |
| KPNA3        | 0.008663621  | 0.228010979  | 0.819704578 | 0.867730622 | no |
| FAM66D       | -0.008632614 | -0.227916037 | 0.819778358 | 0.86776329  | no |
| RFX3         | -0.008627577 | -0.227783044 | 0.819881711 | 0.867827257 | no |
| TRIM48       | -0.008622617 | -0.227652097 | 0.819983478 | 0.867889538 | no |
| SCXB         | 0.008604974  | 0.227186233  | 0.820345551 | 0.868227313 | no |
| PPP2R3C      | 0.008600629  | 0.227071515  | 0.820434717 | 0.868271639 | no |
| C17orf97     | -0.008598748 | -0.227021846 | 0.820473324 | 0.868271639 | no |
| CEP76        | -0.008593751 | -0.22688992  | 0.820575869 | 0.868334707 | no |
| SLC38A5      | 0.008589923  | 0.226788844  | 0.820654436 | 0.868372397 | no |
| SNORA36C     | -0.008584994 | -0.226658698 | 0.820755603 | 0.868433995 | no |
| LCN1         | 0.008580018  | 0.22652731   | 0.820857737 | 0.86849661  | no |
| MPDU1        | -0.008559087 | -0.225974664 | 0.821287373 | 0.868905709 | no |
| NKIRAS2      | 0.008555684  | 0.225884805  | 0.821357236 | 0.868934153 | no |
| RABGGTA      | -0.008553547 | -0.22582837  | 0.821401113 | 0.868935104 | no |
| FAM25B       | -0.008546383 | -0.225639215 | 0.821548182 | 0.869045213 | no |
| LOC100287704 | -0.0085441   | -0.225578958 | 0.821595034 | 0.869049304 | no |
| FLJ46111     | 0.008540411  | 0.225481554  | 0.82167077  | 0.869083946 | no |
| PWRN2        | -0.008505568 | -0.224561565 | 0.822386182 | 0.869795136 | no |
| MPZ          | 0.008494836  | 0.224278207  | 0.82260656  | 0.869982708 | no |
| KRT77        | 0.008484522  | 0.224005866  | 0.822818382 | 0.870158412 | no |
| UNCX         | -0.008480798 | -0.223907531 | 0.822894869 | 0.870158412 | no |
| ASMT         | 0.008480459  | 0.223898604  | 0.822901812 | 0.870158412 | no |
| HMGB4        | -0.008474787 | -0.223751036 | 0.823016597 | 0.870234274 | no |
| DUXA         | -0.008463788 | -0.223458431 | 0.823244208 | 0.870429422 | no |
| GEMIN8P4     | 0.008459093  | 0.223334446  | 0.823340658 | 0.870449312 | no |
| LOC729176    | 0.008456928  | 0.223277295  | 0.823385118 | 0.870449312 | no |



|          |              |              |             |             |    |
|----------|--------------|--------------|-------------|-------------|----|
| CUZD1    | -0.008456584 | -0.223268217 | 0.82339218  | 0.870449312 | no |
| KRT37    | -0.008448735 | -0.223060957 | 0.823553419 | 0.870535354 | no |
| SEMA4C   | 0.00844843   | 0.223052903  | 0.823559685 | 0.870535354 | no |
| FAM96B   | -0.008441866 | -0.222879591 | 0.82369452  | 0.870632361 | no |
| INSC     | -0.008435764 | -0.222718491 | 0.823819859 | 0.870661693 | no |
| LIG1     | 0.008434096  | 0.22267445   | 0.823854124 | 0.870661693 | no |
| A2ML1    | -0.008432029 | -0.222619856 | 0.823896601 | 0.870661693 | no |
| PRAMEF2  | 0.008430556  | 0.222580977  | 0.823926851 | 0.870661693 | no |
| NAT14    | -0.008430033 | -0.222567176 | 0.823937589 | 0.870661693 | no |
| BCL2     | -0.008427489 | -0.222499998 | 0.823989857 | 0.870671419 | no |
| SRRM5    | -0.008421534 | -0.22234276  | 0.824112202 | 0.870755187 | no |
| SSX8     | -0.008416527 | -0.222210553 | 0.824215073 | 0.870818371 | no |
| GRP      | -0.008413284 | -0.222124933 | 0.824281696 | 0.870843253 | no |
| PSG1     | 0.00839455   | 0.221630285  | 0.824666621 | 0.871204397 | no |
| FIBP     | 0.008386894  | 0.221428135  | 0.824823942 | 0.871325067 | no |
| CEACAM16 | -0.008384053 | -0.221353143 | 0.824882305 | 0.871341194 | no |
| KIR3DX1  | -0.008375073 | -0.221116015 | 0.82506686  | 0.87149061  | no |
| MS4A12   | -0.008367344 | -0.220911943 | 0.825225695 | 0.871612846 | no |
| PTENP1   | -0.008362428 | -0.220782145 | 0.825326724 | 0.871665733 | no |
| HPCAL1   | -0.008359058 | -0.220693179 | 0.825395973 | 0.871665733 | no |
| S100A1   | -0.008358614 | -0.220681444 | 0.825405107 | 0.871665733 | no |
| RXFP4    | -0.008346959 | -0.220373706 | 0.825644654 | 0.871873165 | no |
| HELT     | -0.008320636 | -0.219678703 | 0.826185712 | 0.872398951 | no |
| LNX1     | -0.008309731 | -0.21939077  | 0.826409891 | 0.872589293 | no |
| KRT28    | -0.008307669 | -0.219336317 | 0.826452289 | 0.872589293 | no |
| FAM75A2  | -0.008297613 | -0.219070817 | 0.826659017 | 0.872761985 | no |
| RPS21    | -0.008293537 | -0.218963178 | 0.826742832 | 0.872804897 | no |
| PLA2G12B | -0.008279289 | -0.218586993 | 0.827035772 | 0.873068569 | no |
| SCAMP3   | 0.008271556  | 0.218382812  | 0.82719478  | 0.873190835 | no |
| MC3R     | -0.008255037 | -0.217946655 | 0.827534466 | 0.873503802 | no |
| SRRD     | 0.008251134  | 0.217843612  | 0.827614722 | 0.873542911 | no |
| MT1IP    | 0.00824672   | 0.217727062  | 0.827705501 | 0.87359312  | no |
| NDUFAB1  | 0.008242097  | 0.217605007  | 0.827800569 | 0.873647495 | no |
| SCARB2   | 0.008240013  | 0.217549965  | 0.827843442 | 0.873647495 | no |
| CCL1     | -0.008232086 | -0.217340678 | 0.828006463 | 0.873773928 | no |
| AGTPBP1  | -0.008222083 | -0.217076566 | 0.828212202 | 0.873945422 | no |
| SDC4P    | 0.008219525  | 0.217009018  | 0.828264822 | 0.873955335 | no |
| SEC23B   | 0.008200551  | 0.216508031  | 0.828655118 | 0.87432153  | no |
| CYP26B1  | 0.008192242  | 0.216288647  | 0.828826043 | 0.87445624  | no |
| LIPM     | 0.008180052  | 0.215966787  | 0.829076823 | 0.874651112 | no |
| HMX2     | -0.008179058 | -0.215940548 | 0.829097268 | 0.874651112 | no |
| OR7A17   | -0.008170246 | -0.21570788  | 0.829278566 | 0.874796726 | no |
| FAHD2A   | 0.00815588   | 0.215328568  | 0.82957415  | 0.875062877 | no |
| ETV5     | 0.008139356  | 0.214892273  | 0.829914168 | 0.875375868 | no |
| PPP1R16A | -0.008135283 | -0.214784731 | 0.829997984 | 0.875418605 | no |
| TMEM86B  | -0.008123731 | -0.214479731 | 0.830235705 | 0.875579727 | no |
| FOXI2    | 0.008122295  | 0.21444181   | 0.830265262 | 0.875579727 | no |
| ARGFXP2  | -0.008121177 | -0.214412291 | 0.83028827  | 0.875579727 | no |
| KRT25    | -0.008119442 | -0.214366484 | 0.830323974 | 0.875579727 | no |
| CLDN2    | -0.008109847 | -0.214113149 | 0.830521443 | 0.875742283 | no |
| EIF2C4   | -0.008089544 | -0.213577069 | 0.830939341 | 0.876137241 | no |

|              |              |              |             |             |    |
|--------------|--------------|--------------|-------------|-------------|----|
| THY1         | -0.008080686 | -0.213343207 | 0.831121661 | 0.876283779 | no |
| FLG          | -0.008066328 | -0.212964091 | 0.831417243 | 0.876541996 | no |
| PCDHB16      | -0.008064577 | -0.212917872 | 0.831453279 | 0.876541996 | no |
| IL13         | -0.008061293 | -0.212831165 | 0.831520885 | 0.87654532  | no |
| CXorf61      | 0.008060212  | 0.21280262   | 0.831543142 | 0.87654532  | no |
| FAM71E1      | -0.008056199 | -0.212696654 | 0.831625766 | 0.876586713 | no |
| STK31        | -0.008050663 | -0.2125505   | 0.83173973  | 0.876661133 | no |
| FAM187B      | -0.008040211 | -0.212274531 | 0.831954926 | 0.87684224  | no |
| PLLP         | -0.00803127  | -0.212038443 | 0.832139032 | 0.876990562 | no |
| HINT2        | -0.008024691 | -0.211864756 | 0.832274484 | 0.877087595 | no |
| MKKS         | -0.008013483 | -0.211568824 | 0.83250528  | 0.877285091 | no |
| LOC100130933 | -0.007979086 | -0.210660618 | 0.833213678 | 0.877985831 | no |
| SGCB         | -0.007973559 | -0.210514689 | 0.833327514 | 0.878015453 | no |
| C2orf83      | 0.007973504  | 0.210513241  | 0.833328644 | 0.878015453 | no |
| TTLL8        | -0.007964937 | -0.210287044 | 0.833505104 | 0.878155612 | no |
| SLC22A25     | -0.00795573  | -0.210043934 | 0.833694766 | 0.878309665 | no |
| SEPW1        | -0.007941125 | -0.209658328 | 0.833995618 | 0.878580836 | no |
| NCRNA00159   | 0.007927486  | 0.209298204  | 0.83427661  | 0.878831058 | no |
| NDUFA13      | -0.007894867 | -0.208436972 | 0.834948685 | 0.879493202 | no |
| C19orf20     | -0.007891749 | -0.208354635 | 0.835012945 | 0.879515067 | no |
| SPESP1       | -0.00788639  | -0.208213139 | 0.835123377 | 0.879585561 | no |
| RFX4         | -0.00788211  | -0.208100144 | 0.835211567 | 0.879632623 | no |
| H2BFWT       | -0.007866091 | -0.207677188 | 0.835541694 | 0.879912349 | no |
| CSPG4PY2     | 0.007864999  | 0.207648343  | 0.83556421  | 0.879912349 | no |
| ZP2          | -0.007848551 | -0.207214084 | 0.835903192 | 0.880223475 | no |
| SAMD13       | 0.007840482  | 0.207001023  | 0.836069518 | 0.880352769 | no |
| B4GALNT3     | -0.007837513 | -0.206922639 | 0.836130711 | 0.880371352 | no |
| CYP24A1      | 0.007828337  | 0.206680361  | 0.836319857 | 0.880523402 | no |
| OR5B3        | 0.007826282  | 0.206626097  | 0.836362223 | 0.880523402 | no |
| PLA2G3       | 0.007821746  | 0.206506344  | 0.836455718 | 0.880575981 | no |
| C1orf57      | -0.007819439 | -0.206445413 | 0.83650329  | 0.88058021  | no |
| C19orf52     | -0.007804853 | -0.2060603   | 0.836803982 | 0.880850883 | no |
| UGT1A4       | -0.007799832 | -0.205927726 | 0.8369075   | 0.880913985 | no |
| LENG1        | -0.007787838 | -0.20561105  | 0.837154782 | 0.881128397 | no |
| E2F3         | 0.007777544  | 0.205339261  | 0.837367026 | 0.88130591  | no |
| RHBG         | -0.007773972 | -0.205244954 | 0.837440674 | 0.881337543 | no |
| DAZ4         | -0.007770652 | -0.205157291 | 0.837509135 | 0.881363715 | no |
| TMPRSS4      | 0.007768016  | 0.205087699  | 0.837563485 | 0.881375034 | no |
| LOC731789    | 0.007765316  | 0.205016417  | 0.837619155 | 0.881387742 | no |
| TMEM9B       | -0.007762407 | -0.204939603 | 0.837679146 | 0.881404995 | no |
| KRTAP4-3     | -0.007759608 | -0.204865703 | 0.837736862 | 0.881419852 | no |
| LYPD2        | 0.007731184  | 0.204115219  | 0.838323045 | 0.881990702 | no |
| GAB4         | 0.007725084  | 0.203954167  | 0.83844885  | 0.882077159 | no |
| ASFMR1       | 0.00771224   | 0.203615044  | 0.838713768 | 0.882309951 | no |
| PIWIL1       | 0.007709392  | 0.20353983   | 0.838772526 | 0.882325855 | no |
| STAC2        | 0.007695547  | 0.203174275  | 0.839058117 | 0.882580355 | no |
| GTF3C3       | 0.007687173  | 0.202953195  | 0.839230846 | 0.88271612  | no |
| CLDND1       | 0.007681656  | 0.202807519  | 0.839344668 | 0.882789913 | no |
| C17orf105    | -0.00767275  | -0.202572382 | 0.839528394 | 0.882937217 | no |
| WBP2NL       | -0.007667545 | -0.202434955 | 0.839635778 | 0.883004221 | no |
| TMEM99       | 0.007665167  | 0.202372155  | 0.83968485  | 0.883009898 | no |

|           |              |              |             |             |    |
|-----------|--------------|--------------|-------------|-------------|----|
| P2RX3     | 0.007652155  | 0.202028614  | 0.839953306 | 0.883217347 | no |
| FAM160A1  | 0.007651371  | 0.202007904  | 0.83996949  | 0.883217347 | no |
| AKT1      | 0.007647603  | 0.201908423  | 0.840047231 | 0.883253155 | no |
| LRRFIP2   | -0.007641695 | -0.201752422 | 0.840169145 | 0.883335402 | no |
| KCNF1     | -0.007639344 | -0.201690346 | 0.840217659 | 0.883340472 | no |
| PTGDS     | -0.007629773 | -0.201437658 | 0.840415144 | 0.883502151 | no |
| MPP6      | -0.007621063 | -0.201207675 | 0.840594893 | 0.88364517  | no |
| OR8K3     | 0.007617785  | 0.201121131  | 0.840662535 | 0.883670331 | no |
| CDRT15P   | 0.007611171  | 0.200946504  | 0.840799028 | 0.883767858 | no |
| LOC643923 | -0.00760871  | -0.200881519 | 0.840849823 | 0.883775302 | no |
| NAPEPLD   | -0.007604874 | -0.200780242 | 0.840928986 | 0.883812561 | no |
| CCT4      | -0.007578769 | -0.200091    | 0.841467776 | 0.884332857 | no |
| TTY10     | -0.00757082  | -0.199881099 | 0.841631874 | 0.88445934  | no |
| FAT2      | -0.007568519 | -0.199820353 | 0.841679365 | 0.884463275 | no |
| DCD       | -0.007556537 | -0.199504002 | 0.8419267   | 0.884677201 | no |
| LOC401588 | 0.007552634  | 0.199400948  | 0.842007275 | 0.884715886 | no |
| CASC4     | 0.007549359  | 0.199314469  | 0.842074891 | 0.884740953 | no |
| OR8D2     | -0.007530862 | -0.198826109 | 0.842456753 | 0.885041016 | no |
| RBMY2EP   | -0.007530862 | -0.198826109 | 0.842456753 | 0.885041016 | no |
| ZNF679    | -0.007529164 | -0.198781279 | 0.842491809 | 0.885041016 | no |
| BMPER     | 0.00751659   | 0.198449274  | 0.842751437 | 0.885254998 | no |
| PRPF40A   | 0.007515058  | 0.198408819  | 0.842783074 | 0.885254998 | no |
| RASD1     | 0.007504754  | 0.198136767  | 0.842995833 | 0.885432477 | no |
| ASB10     | 0.007459346  | 0.196937869  | 0.843933571 | 0.886371373 | no |
| SLC10A2   | 0.007445402  | 0.196569709  | 0.844221577 | 0.886601983 | no |
| PPEF2     | 0.007444447  | 0.196545082  | 0.844240844 | 0.886601983 | no |
| INS       | -0.007435949 | -0.196320121 | 0.844416839 | 0.88674075  | no |
| ABCC9     | -0.007400884 | -0.195394286 | 0.845141235 | 0.887455359 | no |
| COL9A2    | -0.007392467 | -0.19517207  | 0.845315122 | 0.887591854 | no |
| KLK6      | -0.007382739 | -0.194915226 | 0.845516115 | 0.887756793 | no |
| CLCA2     | 0.007335389  | 0.193665035  | 0.846494596 | 0.888738004 | no |
| PCK1      | 0.0073249    | 0.193388108  | 0.846711368 | 0.888912901 | no |
| HSD11B2   | -0.007323074 | -0.193339892 | 0.846749112 | 0.888912901 | no |
| SLC30A2   | 0.007315684  | 0.193144762  | 0.846901865 | 0.889027098 | no |
| GAGE2A    | -0.007307647 | -0.192932559 | 0.847067989 | 0.889155319 | no |
| FX1D1     | 0.007303629  | 0.192826469  | 0.847151045 | 0.889196336 | no |
| MAGEA8    | -0.007299528 | -0.192718203 | 0.847235806 | 0.889239138 | no |
| STRA13    | 0.00728421   | 0.192313769  | 0.847552451 | 0.889525304 | no |
| OR2K2     | 0.007280193  | 0.192207708  | 0.847635493 | 0.889566281 | no |
| TMEM225   | 0.007268535  | 0.191899906  | 0.847876503 | 0.889773027 | no |
| FBX015    | -0.007257917 | -0.191619564 | 0.848096024 | 0.889957203 | no |
| DCAF8L2   | -0.007250726 | -0.191429678 | 0.84824472  | 0.890067042 | no |
| PCDHA13   | -0.007247255 | -0.19133806  | 0.848316468 | 0.890096131 | no |
| OR4A5     | -0.007236806 | -0.191062172 | 0.848532524 | 0.890276625 | no |
| INSL6     | -0.007227413 | -0.19081416  | 0.84872676  | 0.890434209 | no |
| TMEM171   | 0.007219079  | 0.190594126  | 0.848899091 | 0.890568796 | no |
| SPAM1     | -0.007216311 | -0.190521027 | 0.848956345 | 0.890582648 | no |
| CCNL2     | -0.007210532 | -0.190368469 | 0.849075835 | 0.890661784 | no |
| TMEM203   | -0.007187347 | -0.189756294 | 0.849555353 | 0.891118554 | no |
| SHOC2     | 0.007181498  | 0.189601879  | 0.849676315 | 0.891154039 | no |
| OC90      | 0.007181449  | 0.189600574  | 0.849677338 | 0.891154039 | no |

|              |              |              |             |             |    |
|--------------|--------------|--------------|-------------|-------------|----|
| RGNEF        | 0.00717757   | 0.189498166  | 0.849757562 | 0.891191949 | no |
| TTY6         | -0.007147194 | -0.188696157 | 0.850385892 | 0.891804656 | no |
| USP9Y        | 0.00713043   | 0.188253547  | 0.850732693 | 0.892122074 | no |
| ARIH1        | 0.007124275  | 0.188091044  | 0.850860028 | 0.892209328 | no |
| RGL2         | 0.007117248  | 0.187905499  | 0.851005422 | 0.892315508 | no |
| HMG1         | 0.007112414  | 0.187777856  | 0.851105447 | 0.892333712 | no |
| STX7         | -0.007110223 | -0.187720021 | 0.851150769 | 0.892333712 | no |
| GRAMD1C      | -0.007110009 | -0.187714379 | 0.85115519  | 0.892333712 | no |
| LOC93432     | -0.00710778  | -0.187655518 | 0.851201317 | 0.8923358   | no |
| MRPL44       | -0.007103714 | -0.187548161 | 0.85128545  | 0.892377727 | no |
| SCARNA14     | -0.007095104 | -0.18732083  | 0.851463607 | 0.892518208 | no |
| DRAP1        | 0.007071856  | 0.186707034  | 0.851944671 | 0.892944004 | no |
| CABP7        | 0.007071205  | 0.18668984   | 0.851958148 | 0.892944004 | no |
| LOC100124692 | -0.007063529 | -0.186487164 | 0.852117008 | 0.893032071 | no |
| SSPN         | 0.007062876  | 0.186469934  | 0.852130513 | 0.893032071 | no |
| TGIF2LX      | 0.007058896  | 0.186364853  | 0.85221288  | 0.893072099 | no |
| RAB9BP1      | 0.007042995  | 0.185945024  | 0.852541975 | 0.893370667 | no |
| GAGE2D       | -0.007027889 | -0.185546186 | 0.852854639 | 0.893651987 | no |
| TMEM160      | -0.007022866 | -0.185413547 | 0.852958625 | 0.893675602 | no |
| TRIT1        | 0.007022231  | 0.185396798  | 0.852971757 | 0.893675602 | no |
| GIPC1        | 0.007020114  | 0.185340907  | 0.853015575 | 0.893675602 | no |
| DCAF4L2      | 0.007018259  | 0.185291916  | 0.853053983 | 0.893675602 | no |
| MFSD2A       | -0.007007882 | -0.185017939 | 0.853268788 | 0.893854319 | no |
| MEP1A        | -0.007003343 | -0.184898083 | 0.853362761 | 0.893906445 | no |
| FOX3         | -0.006999306 | -0.184791512 | 0.85344632  | 0.893947658 | no |
| CFHR4        | 0.006993849  | 0.184647432  | 0.853559292 | 0.893995846 | no |
| POM121       | -0.006992812 | -0.184620053 | 0.85358076  | 0.893995846 | no |
| OR1A2        | -0.006982171 | -0.184339091 | 0.853801068 | 0.894180264 | no |
| SNORA47      | 0.006965825  | 0.183907514  | 0.854139499 | 0.894488366 | no |
| LAMA1        | 0.006960961  | 0.1837791    | 0.854240204 | 0.894547492 | no |
| PRAME        | 0.006953427  | 0.183580169  | 0.854396213 | 0.894664524 | no |
| C8orf12      | -0.006949022 | -0.183463887 | 0.854487408 | 0.894713678 | no |
| KRT16        | -0.006943171 | -0.183309382 | 0.854608584 | 0.894794218 | no |
| EGLN3        | -0.00693447  | -0.183079665 | 0.854788752 | 0.894936513 | no |
| SRL          | -0.006923613 | -0.182793009 | 0.85501359  | 0.895125557 | no |
| AURKAIP1     | -0.00691611  | -0.182594908 | 0.855168976 | 0.895241876 | no |
| CLEC3A       | 0.006903418  | 0.182259811  | 0.855431832 | 0.895470683 | no |
| C18orf56     | 0.006892167  | 0.181962761  | 0.855664856 | 0.895668241 | no |
| FITM2        | -0.006886722 | -0.181818996 | 0.85577764  | 0.895739921 | no |
| LOC338588    | -0.006868748 | -0.181344425 | 0.856149959 | 0.896083236 | no |
| MAG          | -0.006863881 | -0.181215927 | 0.856250776 | 0.896142364 | no |
| KRTAP19-8    | 0.006854631  | 0.180971704  | 0.856442395 | 0.896274456 | no |
| RIPK4        | 0.006853509  | 0.180942068  | 0.856465649 | 0.896274456 | no |
| CWC25        | -0.006846794 | -0.180764778 | 0.856604758 | 0.896373635 | no |
| GAGE13       | -0.006840988 | -0.180611495 | 0.856725034 | 0.896453097 | no |
| C9orf43      | -0.006837885 | -0.180529557 | 0.856789329 | 0.896473977 | no |
| TAF2         | 0.006823904  | 0.180160423  | 0.857078994 | 0.896730651 | no |
| RASL12       | -0.006818102 | -0.180007242 | 0.857199203 | 0.896743009 | no |
| OR52M1       | 0.006816844  | 0.179974019  | 0.857225275 | 0.896743009 | no |
| CGB2         | 0.006816637  | 0.179968575  | 0.857229548 | 0.896743009 | no |
| OR3A4        | -0.006813654 | -0.179889795 | 0.857291372 | 0.896743009 | no |

|            |              |              |             |             |    |
|------------|--------------|--------------|-------------|-------------|----|
| MAGEA1     | -0.00681263  | -0.179862779 | 0.857312574 | 0.896743009 | no |
| PAX4       | -0.00680791  | -0.179738138 | 0.857410391 | 0.896798928 | no |
| NBN        | -0.006799176 | -0.179507556 | 0.857591356 | 0.896941155 | no |
| EXD1       | -0.006796997 | -0.179450018 | 0.857636514 | 0.896941155 | no |
| UMOD       | -0.006794925 | -0.179395296 | 0.857679462 | 0.896941155 | no |
| ATPAF2     | 0.006788054  | 0.179213905  | 0.857821828 | 0.897043639 | no |
| MGLL       | -0.006778446 | -0.178960226 | 0.858020939 | 0.897205449 | no |
| OR6C6      | -0.006773401 | -0.178827028 | 0.858125489 | 0.897268366 | no |
| KRTAP10-12 | -0.006739683 | -0.177936791 | 0.858824318 | 0.897932484 | no |
| TMEM38A    | 0.006738471  | 0.177904766  | 0.858849459 | 0.897932484 | no |
| XPOT       | -0.006711139 | -0.177183132 | 0.85941602  | 0.898375145 | no |
| ZNF710     | 0.006710353  | 0.177162387  | 0.859432308 | 0.898375145 | no |
| NAIF1      | -0.006710114 | -0.177156082 | 0.859437258 | 0.898375145 | no |
| PENK       | -0.006709471 | -0.177139101 | 0.859450591 | 0.898375145 | no |
| ELAC2      | -0.006704921 | -0.177018969 | 0.859544916 | 0.898427292 | no |
| CGB5       | -0.006701985 | -0.176941449 | 0.859605784 | 0.898444465 | no |
| MRPS7      | 0.006697241  | 0.176816197  | 0.859704131 | 0.898500808 | no |
| SNAR-F     | 0.006683694  | 0.176458519  | 0.859984993 | 0.898747885 | no |
| OR9Q2      | -0.006667845 | -0.176040076 | 0.860313592 | 0.8990401   | no |
| C1orf173   | -0.006664225 | -0.175944495 | 0.860388654 | 0.8990401   | no |
| MATN4      | -0.006663774 | -0.175932586 | 0.860398006 | 0.8990401   | no |
| PDCD6      | 0.006657798  | 0.175774815  | 0.86052191  | 0.8991231   | no |
| LRRC30     | -0.006650009 | -0.175569161 | 0.860683424 | 0.899233628 | no |
| PLSCR5     | -0.006648407 | -0.17552686  | 0.860716647 | 0.899233628 | no |
| RPL23A     | 0.00663011   | 0.17504378   | 0.861096069 | 0.899583544 | no |
| MAPK7      | 0.006622249  | 0.174836212  | 0.861259107 | 0.899645694 | no |
| RBBP5      | -0.006622233 | -0.174835811 | 0.861259422 | 0.899645694 | no |
| SOX13      | 0.006620805  | 0.174798089  | 0.861289052 | 0.899645694 | no |
| ST70T2     | 0.00661205   | 0.174566955  | 0.861470609 | 0.89975775  | no |
| MRPL41     | 0.00661134   | 0.174548207  | 0.861485336 | 0.89975775  | no |
| RPS16      | -0.006598887 | -0.1742194   | 0.861743629 | 0.899981026 | no |
| HPS6       | -0.006578901 | -0.173691726 | 0.862158172 | 0.900367455 | no |
| LOC442308  | 0.006572785  | 0.17353026   | 0.862285028 | 0.900453422 | no |
| GEMIN5     | -0.006569033 | -0.173431177 | 0.862362875 | 0.900488204 | no |
| DNAJB8     | 0.006554646  | 0.173051341  | 0.862661313 | 0.900753314 | no |
| SEC14L4    | -0.006543838 | -0.172765988 | 0.862885528 | 0.900940901 | no |
| HIST1H2AA  | -0.006538424 | -0.172623048 | 0.862997847 | 0.901011643 | no |
| TMSB15B    | 0.0065308    | 0.17242174   | 0.863156035 | 0.901130265 | no |
| AQPEP      | -0.006526414 | -0.172305931 | 0.86324704  | 0.90117874  | no |
| OR10G8     | 0.006520829  | 0.172158493  | 0.863362903 | 0.901253158 | no |
| RGPD5      | 0.006515144  | 0.172008385  | 0.863480866 | 0.901329761 | no |
| HNRNPH1    | 0.006502121  | 0.171664559  | 0.863751077 | 0.901562508 | no |
| P2RY4      | -0.0065001   | -0.171611186 | 0.863793023 | 0.901562508 | no |
| FAM118A    | 0.006475761  | 0.170968586  | 0.864298086 | 0.902018821 | no |
| LOC643955  | -0.006474732 | -0.170941407 | 0.864319449 | 0.902018821 | no |
| OXT        | -0.00647     | -0.17081649  | 0.864417636 | 0.902074728 | no |
| SYCP1      | -0.006445395 | -0.170166838 | 0.864928311 | 0.902561063 | no |
| TTC18      | 0.006432395  | 0.169823616  | 0.865198131 | 0.902796027 | no |
| C14orf23   | 0.006429694  | 0.169752308  | 0.865254192 | 0.902807929 | no |
| PARD6B     | 0.006426955  | 0.169679982  | 0.865311053 | 0.902820666 | no |
| C6orf226   | -0.006406609 | -0.169142805 | 0.865733391 | 0.903214702 | no |

|          |              |              |             |             |    |
|----------|--------------|--------------|-------------|-------------|----|
| SNORA56  | -0.006398403 | -0.168926136 | 0.865903751 | 0.903345823 | no |
| C18orf62 | -0.006357453 | -0.167844977 | 0.866753926 | 0.904186104 | no |
| ALKBH8   | -0.006347067 | -0.167570764 | 0.866969579 | 0.904364408 | no |
| SLC22A24 | 0.006336684  | 0.167296605  | 0.8671852   | 0.90454266  | no |
| LMOD3    | 0.006331149  | 0.167150488  | 0.867300122 | 0.904615862 | no |
| SS18L2   | -0.006319397 | -0.166840189 | 0.867544185 | 0.904801669 | no |
| GALP     | 0.006318261  | 0.166810205  | 0.867567769 | 0.904801669 | no |
| MOBKL3   | 0.006297436  | 0.166260373  | 0.868000266 | 0.905206034 | no |
| HTN1     | -0.006280836 | -0.165822112 | 0.868345031 | 0.905518869 | no |
| VRK1     | -0.006276272 | -0.165701598 | 0.868439839 | 0.905571028 | no |
| TTY18    | -0.006271292 | -0.165570127 | 0.868543269 | 0.905632172 | no |
| KIAA0141 | 0.006267638  | 0.165473637  | 0.868619181 | 0.905664618 | no |
| OR4C46   | 0.006260654  | 0.165289248  | 0.868764249 | 0.905769161 | no |
| TPSD1    | -0.006254494 | -0.165126601 | 0.868892215 | 0.905855865 | no |
| C1orf111 | 0.00624773   | 0.16494802   | 0.869032722 | 0.905955634 | no |
| PRRG1    | -0.006241854 | -0.164792877 | 0.869154791 | 0.906036172 | no |
| TFAP2B   | -0.006231264 | -0.164513281 | 0.869374789 | 0.906218782 | no |
| ZIK1     | 0.006226514  | 0.164387862  | 0.869473478 | 0.906251714 | no |
| EID2     | -0.006225428 | -0.1643592   | 0.869496031 | 0.906251714 | no |
| KIF15    | 0.006221236  | 0.164248529  | 0.869583117 | 0.906279726 | no |
| CAPZA3   | -0.006219819 | -0.164211116 | 0.869612557 | 0.906279726 | no |
| TNS3     | -0.006200487 | -0.163700691 | 0.870014229 | 0.906651599 | no |
| ARGFX    | -0.006195311 | -0.163564037 | 0.870121772 | 0.906670648 | no |
| UNC45B   | 0.006194371  | 0.163539212  | 0.870141309 | 0.906670648 | no |
| TMCC3    | 0.006193132  | 0.163506514  | 0.870167042 | 0.906670648 | no |
| TACC3    | 0.006181027  | 0.163186921  | 0.870418567 | 0.906849024 | no |
| CCNO     | -0.006180576 | -0.163175006 | 0.870427944 | 0.906849024 | no |
| OSBPL5   | -0.006170682 | -0.162913771 | 0.870633355 | 0.907016494 | no |
| KIAA1683 | 0.006165028  | 0.162764507  | 0.870751032 | 0.907078113 | no |
| GPATCH1  | -0.006163517 | -0.16272462  | 0.870782426 | 0.907078113 | no |
| ZNF136   | -0.006161127 | -0.162661495 | 0.870832112 | 0.907083134 | no |
| ANP32D   | 0.006134152  | 0.161949306  | 0.87139271  | 0.907620308 | no |
| FAM21A   | -0.006119791 | -0.161570135 | 0.871691199 | 0.907884435 | no |
| FLJ33630 | 0.00610361   | 0.161142928  | 0.872027526 | 0.908187942 | no |
| RSPO3    | 0.00609047   | 0.160795991  | 0.872300675 | 0.908425623 | no |
| MAMSTR   | -0.006087319 | -0.160712814 | 0.872366164 | 0.908447031 | no |
| ZNF175   | 0.006084643  | 0.160642158  | 0.872421795 | 0.908458172 | no |
| SCRG1    | 0.00607891   | 0.160490807  | 0.872540964 | 0.90853547  | no |
| CSAG2    | -0.006075303 | -0.160395568 | 0.872615955 | 0.908566761 | no |
| PWRN1    | -0.00606879  | -0.160223603 | 0.872751359 | 0.90866095  | no |
| PRKAG3   | 0.006066007  | 0.160150128  | 0.872809215 | 0.908674393 | no |
| PTTG3P   | -0.006056957 | -0.159911199 | 0.872997356 | 0.90879983  | no |
| PHF19    | -0.006055888 | -0.15988295  | 0.873019601 | 0.90879983  | no |
| CCDC87   | -0.006053619 | -0.159823051 | 0.873066769 | 0.908802139 | no |
| FAM27L   | 0.006046403  | 0.159632547  | 0.873216786 | 0.9089115   | no |
| C11orf52 | -0.006043005 | -0.159542817 | 0.873287448 | 0.908938256 | no |
| C8orf33  | -0.006030071 | -0.159201348 | 0.873556361 | 0.909171343 | no |
| POLA1    | 0.006024959  | 0.15906636   | 0.873662671 | 0.909235182 | no |
| WDR70    | -0.006005933 | -0.158564041 | 0.874058292 | 0.909559365 | no |
| USP24    | 0.006005651  | 0.158556608  | 0.874064146 | 0.909559365 | no |
| USP38    | 0.005990987  | 0.158169435  | 0.874369101 | 0.909829876 | no |

|           |              |              |             |             |    |
|-----------|--------------|--------------|-------------|-------------|----|
| C1QTNF3   | 0.005974601  | 0.157736802  | 0.874709884 | 0.910137638 | no |
| HIST2H3C  | -0.005971455 | -0.157653741 | 0.874775314 | 0.910144657 | no |
| SUZ12     | -0.005969947 | -0.157613944 | 0.874806663 | 0.910144657 | no |
| CGRRF1    | 0.005962293  | 0.157411842  | 0.87496587  | 0.910263454 | no |
| ZNF689    | 0.005954854  | 0.157215453  | 0.875120581 | 0.910377561 | no |
| RCL1      | -0.00594972  | -0.157079903 | 0.875227366 | 0.910441803 | no |
| ASZ1      | 0.005938953  | 0.156795636  | 0.875451318 | 0.910605354 | no |
| LOC340508 | 0.005937831  | 0.156765996  | 0.87547467  | 0.910605354 | no |
| TRPT1     | -0.005932576 | -0.156627265 | 0.875583969 | 0.910672189 | no |
| IRAK1BP1  | 0.00592941   | 0.156543679  | 0.875649824 | 0.910693834 | no |
| METTL14   | 0.005918675  | 0.156260231  | 0.875873149 | 0.910879241 | no |
| LOC200726 | 0.005914844  | 0.156159083  | 0.875952845 | 0.910915267 | no |
| FBN3      | -0.005908514 | -0.155991979 | 0.876084511 | 0.910972778 | no |
| OR13C5    | -0.005907853 | -0.155974525 | 0.876098264 | 0.910972778 | no |
| ZNF665    | 0.005898793  | 0.155735323  | 0.876286744 | 0.911121903 | no |
| NDUFS6    | -0.00589606  | -0.155663166 | 0.876343602 | 0.911134164 | no |
| FLNB      | -0.005867823 | -0.154917643 | 0.876931094 | 0.911698095 | no |
| VASH2     | -0.005847875 | -0.154390973 | 0.877346165 | 0.912082721 | no |
| MORN1     | -0.005842618 | -0.154252184 | 0.87745555  | 0.912149536 | no |
| TCEB3B    | 0.005823586  | 0.153749696  | 0.877851603 | 0.912514329 | no |
| IL31      | 0.005804413  | 0.153243478  | 0.878250626 | 0.912882173 | no |
| LOC255025 | -0.005801887 | -0.153176777 | 0.878303205 | 0.912889893 | no |
| ODC1      | -0.005793391 | -0.152952473 | 0.878480023 | 0.913026736 | no |
| KIAA1797  | 0.005788531  | 0.152824156  | 0.878581178 | 0.913067431 | no |
| KRTAP10-8 | -0.00578717  | -0.152788229 | 0.8786095   | 0.913067431 | no |
| SH3D19    | -0.005781254 | -0.152632038 | 0.878732631 | 0.913098024 | no |
| LRTOMT    | -0.005779992 | -0.152598725 | 0.878758894 | 0.913098024 | no |
| MRPL54    | 0.005779246  | 0.152579022  | 0.878774427 | 0.913098024 | no |
| ZNF749    | -0.005776447 | -0.152505119 | 0.878832689 | 0.913111635 | no |
| USP42     | -0.005771763 | -0.152381444 | 0.878930191 | 0.913122634 | no |
| C16orf3   | -0.005771599 | -0.152377116 | 0.878933603 | 0.913122634 | no |
| TXNL4B    | 0.005761942  | 0.152122163  | 0.879134606 | 0.913284527 | no |
| TTY4C     | -0.005756804 | -0.151986515 | 0.879241554 | 0.913321572 | no |
| DUSP13    | -0.005755889 | -0.151962341 | 0.879260613 | 0.913321572 | no |
| ATP6V1E2  | -0.005738437 | -0.151501588 | 0.879623897 | 0.913651988 | no |
| LYRM1     | 0.00572642   | 0.151184301  | 0.879874079 | 0.913864899 | no |
| MEIG1     | -0.005720563 | -0.151029668 | 0.879996012 | 0.913944592 | no |
| TRAIP     | 0.005705865  | 0.150641605  | 0.880302024 | 0.914215447 | no |
| TTY9B     | 0.005703681  | 0.150583954  | 0.880347487 | 0.914215702 | no |
| TAAR9     | -0.005701321 | -0.150521637 | 0.88039663  | 0.914219778 | no |
| LBX1      | 0.005688955  | 0.150195163  | 0.880654095 | 0.914440167 | no |
| LTBP4     | -0.005682013 | -0.150011865 | 0.880798653 | 0.914543301 | no |
| PCDHGA4   | -0.005646718 | -0.149080009 | 0.881533623 | 0.915259425 | no |
| CRYGC     | -0.005641034 | -0.148929948 | 0.881651988 | 0.915335313 | no |
| C9orf57   | 0.00563687   | 0.148819996  | 0.881738718 | 0.915378352 | no |
| GAGE2C    | -0.005630628 | -0.148655203 | 0.881868708 | 0.915466294 | no |
| FAM83C    | -0.005611513 | -0.148150521 | 0.882266827 | 0.915832557 | no |
| PDILT     | -0.005607971 | -0.148057001 | 0.882340604 | 0.915862118 | no |
| PTP4A1    | 0.005603929  | 0.147950307  | 0.882424775 | 0.91589417  | no |
| TBC1D7    | -0.005602138 | -0.147903014 | 0.882462085 | 0.91589417  | no |
| OR4F4     | 0.005591778  | 0.147629494  | 0.882677872 | 0.916071106 | no |

|           |              |              |             |             |    |
|-----------|--------------|--------------|-------------|-------------|----|
| CA8       | -0.005589301 | -0.147564073 | 0.882729485 | 0.916077648 | no |
| AQR       | 0.005580617  | 0.147334805  | 0.88291037  | 0.916179493 | no |
| KIF11     | 0.005580238  | 0.147324812  | 0.882918253 | 0.916179493 | no |
| ANKAR     | -0.005576234 | -0.147219095 | 0.883001663 | 0.916219021 | no |
| PRR20A    | 0.005539625  | 0.146252537  | 0.883764321 | 0.916963309 | no |
| FAR1      | -0.005537261 | -0.14619013  | 0.883813567 | 0.916967347 | no |
| LOC113230 | 0.005534845  | 0.146126349  | 0.883863897 | 0.916972509 | no |
| NHEG1     | 0.005527755  | 0.145939157  | 0.884011615 | 0.917078703 | no |
| FAM75A3   | -0.005524846 | -0.145862348 | 0.884072228 | 0.917094526 | no |
| C13orf28  | -0.005522432 | -0.145798623 | 0.884122517 | 0.917099638 | no |
| C21orf58  | -0.005514192 | -0.145581057 | 0.884294213 | 0.917230679 | no |
| ELMOD1    | 0.005504149  | 0.145315907  | 0.884503468 | 0.917400663 | no |
| FBX024    | 0.005500521  | 0.145220114  | 0.884579069 | 0.917432011 | no |
| SCARNA27  | -0.005494306 | -0.145056038 | 0.884708563 | 0.917519247 | no |
| TMEM90A   | -0.005488295 | -0.144897341 | 0.884833815 | 0.917602075 | no |
| PTCD1     | -0.005471388 | -0.144450953 | 0.885186141 | 0.917857899 | no |
| CTSL2     | -0.005470265 | -0.144421312 | 0.885209537 | 0.917857899 | no |
| COPG2     | 0.005469922  | 0.14441224   | 0.885216697 | 0.917857899 | no |
| TMEM229A  | 0.005456803  | 0.144065889  | 0.885490084 | 0.918084465 | no |
| LOC441089 | 0.005455079  | 0.144020357  | 0.885526024 | 0.918084465 | no |
| SYNGR4    | -0.005449048 | -0.143861126 | 0.885651716 | 0.918136458 | no |
| AMTN      | -0.005448315 | -0.143841768 | 0.885666997 | 0.918136458 | no |
| MYH13     | -0.005441537 | -0.143662829 | 0.885808249 | 0.918235807 | no |
| ONECUT3   | -0.005435179 | -0.143494956 | 0.885940769 | 0.918326095 | no |
| DHRS13    | 0.005428778  | 0.143325953  | 0.886074185 | 0.918417301 | no |
| POTEC     | -0.005422358 | -0.143156462 | 0.886207989 | 0.918508901 | no |
| SLC6A13   | -0.005419352 | -0.143077094 | 0.886270647 | 0.918526755 | no |
| PCDHB14   | -0.005407191 | -0.142756015 | 0.886524133 | 0.918742372 | no |
| SENPM8    | 0.005400859  | 0.142588854  | 0.886656108 | 0.918813258 | no |
| OR2T3     | -0.005397899 | -0.142510689 | 0.886717821 | 0.918813258 | no |
| TTY11     | 0.005397369  | 0.142496696  | 0.886728869 | 0.918813258 | no |
| LOC647859 | 0.00539174   | 0.142348084  | 0.886846204 | 0.918887745 | no |
| MAFA      | 0.00537554   | 0.141920378  | 0.887183909 | 0.919190544 | no |
| RTN4      | -0.00534824  | -0.141199605 | 0.887753057 | 0.919733093 | no |
| RPL13AP17 | -0.005338334 | -0.140938057 | 0.887959598 | 0.919895605 | no |
| NKX2-4    | 0.005336352  | 0.140885737  | 0.888000916 | 0.919895605 | no |
| AKAP4     | 0.005327133  | 0.140642347  | 0.888193127 | 0.920047579 | no |
| TMPRSS11B | -0.005318964 | -0.140426666 | 0.888363461 | 0.920176877 | no |
| NRG4      | 0.005314298  | 0.140303486  | 0.888460745 | 0.920230499 | no |
| AKNAD1    | 0.005303618  | 0.140021511  | 0.888683446 | 0.920414012 | no |
| LOC360030 | -0.005276094 | -0.139294809 | 0.88925743  | 0.920931279 | no |
| LOC440896 | -0.005274016 | -0.13923995  | 0.889300762 | 0.920931279 | no |
| HUS1B     | -0.005273116 | -0.139216188 | 0.889319532 | 0.920931279 | no |
| OR5K3     | -0.00526678  | -0.139048924 | 0.889451655 | 0.921020925 | no |
| OR9Q1     | 0.005263642  | 0.138966052  | 0.889517116 | 0.921041537 | no |
| OR9I1     | -0.005259544 | -0.138857875 | 0.889602568 | 0.921082846 | no |
| AMHR2     | 0.005249584  | 0.138594903  | 0.889810303 | 0.921250754 | no |
| OR10J5    | -0.005226579 | -0.137987527 | 0.890290129 | 0.921690829 | no |
| FLRT2     | 0.005222779  | 0.137887205  | 0.890369387 | 0.921690829 | no |
| OR52B4    | 0.005220089  | 0.137816175  | 0.890425504 | 0.921690829 | no |
| POLD2     | -0.00521771  | -0.137753374 | 0.890475119 | 0.921690829 | no |



|            |              |              |             |             |    |
|------------|--------------|--------------|-------------|-------------|----|
| ANKRD17    | -0.005216639 | -0.137725108 | 0.890497451 | 0.921690829 | no |
| TRIL       | 0.005216091  | 0.137710635  | 0.890508886 | 0.921690829 | no |
| LOC643837  | -0.00520619  | -0.13744922  | 0.890715424 | 0.921857406 | no |
| PDCL2      | -0.005190293 | -0.13702952  | 0.891047033 | 0.922097519 | no |
| LHX9       | 0.005188892  | 0.136992516  | 0.891076271 | 0.922097519 | no |
| SNORA5C    | -0.005188509 | -0.136982421 | 0.891084248 | 0.922097519 | no |
| B3GALT6    | -0.005178241 | -0.136711318 | 0.891298461 | 0.922271983 | no |
| C2CD4D     | 0.005160559  | 0.136244487  | 0.891667348 | 0.922606471 | no |
| DEFB109P1B | 0.005156066  | 0.136125855  | 0.891761094 | 0.922656251 | no |
| A1CF       | -0.005145199 | -0.13583895  | 0.891987821 | 0.922843607 | no |
| OR52N5     | 0.005141109  | 0.135730963  | 0.892073159 | 0.922843741 | no |
| KRTAP5-8   | 0.005140817  | 0.135723268  | 0.89207924  | 0.922843741 | no |
| C5orf41    | 0.005129806  | 0.135432544  | 0.892308997 | 0.923034193 | no |
| PTPN3      | -0.005118504 | -0.135134158 | 0.892544818 | 0.923230898 | no |
| MRPL14     | -0.005112218 | -0.134968194 | 0.892675988 | 0.923304793 | no |
| ABCB1      | -0.005110703 | -0.134928206 | 0.892707592 | 0.923304793 | no |
| ZG16       | -0.005104957 | -0.134776487 | 0.892827506 | 0.923381581 | no |
| MGC16384   | 0.005085414  | 0.134260524  | 0.893235326 | 0.923756104 | no |
| OR10A4     | -0.005062149 | -0.133646293 | 0.893720854 | 0.924210947 | no |
| SPOP       | -0.005057391 | -0.133520673 | 0.893820157 | 0.924266363 | no |
| TEX14      | -0.005050984 | -0.133351502 | 0.893953889 | 0.924329041 | no |
| FARP2      | 0.005050106  | 0.133328332  | 0.893972206 | 0.924329041 | no |
| MAGEA3     | -0.005034801 | -0.132924238 | 0.894291663 | 0.924612061 | no |
| SMURF2     | -0.005021979 | -0.13258572  | 0.894559293 | 0.92484147  | no |
| POLN       | -0.005012374 | -0.132332126 | 0.89475979  | 0.925001454 | no |
| TLX2       | 0.00500488   | 0.132134287  | 0.89491621  | 0.925087374 | no |
| WDR12      | -0.005004008 | -0.132111266 | 0.894934412 | 0.925087374 | no |
| UBE2Q1     | -0.004982673 | -0.131547976 | 0.895379798 | 0.925500448 | no |
| CRYGN      | 0.004974871  | 0.131341988  | 0.895542679 | 0.925621486 | no |
| PRPH       | 0.004972474  | 0.131278713  | 0.895592714 | 0.925625881 | no |
| HMBS       | -0.004957921 | -0.130894486 | 0.895896547 | 0.925886197 | no |
| SNAR-D     | 0.004956023  | 0.130844376  | 0.895936173 | 0.925886197 | no |
| RLN3       | -0.004952643 | -0.130755141 | 0.896006739 | 0.925894449 | no |
| ISCA1P1    | 0.004951254  | 0.130718456  | 0.89603575  | 0.925894449 | no |
| OR12D3     | -0.004935791 | -0.130310206 | 0.896358604 | 0.926180726 | no |
| TPH1       | -0.004920338 | -0.129902219 | 0.896681267 | 0.926466776 | no |
| TEX15      | 0.004914859  | 0.129757564  | 0.896795675 | 0.926537634 | no |
| ZNF211     | 0.004910794  | 0.129650236  | 0.896880561 | 0.926577986 | no |
| TPRKB      | 0.00490573   | 0.129516542  | 0.896986303 | 0.926639879 | no |
| CYP7B1     | 0.004896488  | 0.129272547  | 0.897179287 | 0.926791888 | no |
| GFMI       | -0.004893473 | -0.129192946 | 0.897242249 | 0.926809574 | no |
| DCAF12     | 0.004863269  | 0.128395502  | 0.897873028 | 0.927389799 | no |
| PACS1      | -0.004862183 | -0.128366837 | 0.897895703 | 0.927389799 | no |
| KRTAP10-9  | -0.004854441 | -0.128162441 | 0.898057392 | 0.927472719 | no |
| NKX2-3     | -0.004853102 | -0.128127076 | 0.898085367 | 0.927472719 | no |
| C19orf71   | 0.004849934  | 0.128043434  | 0.898151535 | 0.927472719 | no |
| C4orf35    | 0.004849553  | 0.12803339   | 0.89815948  | 0.927472719 | no |
| RIOK2      | -0.004842481 | -0.127846664 | 0.898307197 | 0.927577881 | no |
| LMBR1L     | 0.00483562   | 0.127665516  | 0.898450504 | 0.927678479 | no |
| AKR1CL1    | -0.004825849 | -0.127407542 | 0.898654595 | 0.927841825 | no |
| LOC400927  | -0.004814853 | -0.127117238 | 0.898884271 | 0.928031568 | no |

|              |              |              |             |             |    |
|--------------|--------------|--------------|-------------|-------------|----|
| C12orf27     | 0.004808398  | 0.126946822  | 0.899019101 | 0.928096798 | no |
| KANK4        | -0.004807433 | -0.126921341 | 0.899039261 | 0.928096798 | no |
| BHLHE23      | -0.004799443 | -0.126710389 | 0.899206167 | 0.928221703 | no |
| RNF175       | 0.004794945  | 0.12659164   | 0.899300123 | 0.928253076 | no |
| DUS4L        | 0.004791575  | 0.126502656  | 0.899370529 | 0.928253076 | no |
| PTK2B        | -0.004791394 | -0.126497896 | 0.899374296 | 0.928253076 | no |
| KIF19        | -0.004764367 | -0.125784318 | 0.899938928 | 0.928788425 | no |
| CACNG5       | 0.004762083  | 0.125724027  | 0.899986637 | 0.928790252 | no |
| CAPN3        | -0.004756113 | -0.125566416 | 0.900111358 | 0.928848914 | no |
| PRM1         | -0.004754964 | -0.12553608  | 0.900135363 | 0.928848914 | no |
| LOC728723    | 0.004743545  | 0.125234602  | 0.900373936 | 0.929007406 | no |
| LOC153910    | -0.004742873 | -0.125216852 | 0.900387983 | 0.929007406 | no |
| LOC100130581 | 0.004741015  | 0.125167795  | 0.900426804 | 0.929007406 | no |
| PIP          | -0.004712492 | -0.12441474  | 0.901022775 | 0.929546117 | no |
| KIF26B       | -0.004711625 | -0.124391846 | 0.901040894 | 0.929546117 | no |
| CHAT         | 0.004708985  | 0.124322159  | 0.901096047 | 0.929555584 | no |
| LOC100101938 | 0.004701323  | 0.124119862  | 0.901256157 | 0.929673316 | no |
| FCER2        | -0.004692821 | -0.123895392 | 0.901433821 | 0.929809142 | no |
| RPL35        | 0.00469032   | 0.123829371  | 0.901486077 | 0.929815606 | no |
| TBX20        | 0.004666187  | 0.123192216  | 0.901990404 | 0.930230961 | no |
| MAGEB18      | 0.004664929  | 0.123158991  | 0.902016703 | 0.930230961 | no |
| SLC26A7      | 0.004664445  | 0.123146226  | 0.902026808 | 0.930230961 | no |
| CBL          | -0.004652334 | -0.122826479 | 0.902279913 | 0.930444521 | no |
| SNORA11E     | 0.004649805  | 0.122759712  | 0.902332765 | 0.930451566 | no |
| TRPM3        | -0.004644263 | -0.122613394 | 0.902448592 | 0.930518458 | no |
| C1orf150     | 0.004641098  | 0.122529835  | 0.90251474  | 0.930518458 | no |
| BAT2L2       | 0.004640095  | 0.122503345  | 0.902535709 | 0.930518458 | no |
| SSB          | -0.00462103  | -0.121999995 | 0.902934187 | 0.930881821 | no |
| TERT         | -0.004582741 | -0.120989106 | 0.903734533 | 0.931659433 | no |
| MTM1         | 0.004579575  | 0.120905526  | 0.90380071  | 0.931680149 | no |
| SEC14L1      | 0.004577091  | 0.120839935  | 0.903852644 | 0.931686181 | no |
| GPR150       | -0.004570929 | -0.120677243 | 0.903981463 | 0.931741993 | no |
| SBN01        | 0.004570092  | 0.120655148  | 0.903998958 | 0.931741993 | no |
| PLEKHA8      | 0.004547865  | 0.120068326  | 0.904463624 | 0.932173398 | no |
| TMEM163      | 0.00454196   | 0.119912434  | 0.90458707  | 0.932241005 | no |
| SNORA29      | -0.004538398 | -0.119818374 | 0.904661554 | 0.932241005 | no |
| DDX50        | -0.004538111 | -0.119810803 | 0.904667549 | 0.932241005 | no |
| FLRT3        | 0.004531985  | 0.119649056  | 0.904795636 | 0.932306941 | no |
| FLJ35390     | 0.004529744  | 0.11958991   | 0.904842473 | 0.932306941 | no |
| ACOT6        | -0.00452744  | -0.11952907  | 0.904890654 | 0.932306941 | no |
| SLC4A1       | 0.004526228  | 0.119497081  | 0.904915986 | 0.932306941 | no |
| C14orf79     | 0.004505849  | 0.118959041  | 0.905342082 | 0.932698406 | no |
| SLC25A10     | -0.004501882 | -0.1188543   | 0.905425034 | 0.932736336 | no |
| ADH6         | -0.004488034 | -0.118488697 | 0.905714589 | 0.932987088 | no |
| STATH        | -0.004480619 | -0.118292922 | 0.905869647 | 0.933099273 | no |
| NOSIP        | 0.004471344  | 0.118048042  | 0.906063603 | 0.933205136 | no |
| DKFZP434L187 | -0.00447129  | -0.118046612 | 0.906064735 | 0.933205136 | no |
| CHRNA10      | 0.00446121   | 0.117780483  | 0.906275527 | 0.933374693 | no |
| ACO1         | 0.004453025  | 0.117564395  | 0.906446687 | 0.933503419 | no |
| PGS1         | -0.004434123 | -0.117065349 | 0.906841992 | 0.933840004 | no |
| MBL1P        | 0.00443298   | 0.117035176  | 0.906865894 | 0.933840004 | no |

|           |              |              |             |             |    |
|-----------|--------------|--------------|-------------|-------------|----|
| FAM127B   | 0.004428103  | 0.116906411  | 0.906967895 | 0.933897474 | no |
| C8orf30A  | 0.004421076  | 0.116720902  | 0.907114849 | 0.934001223 | no |
| SNORA81   | 0.004408029  | 0.116376448  | 0.907387723 | 0.934217262 | no |
| PRND      | -0.004403348 | -0.11625285  | 0.907485638 | 0.934217262 | no |
| NPTN      | 0.004402892  | 0.116240806  | 0.90749518  | 0.934217262 | no |
| POLR1C    | -0.004402207 | -0.116222733 | 0.907509498 | 0.934217262 | no |
| OR4K13    | 0.004397201  | 0.116090568  | 0.907614203 | 0.934277479 | no |
| CECR7     | -0.004380256 | -0.115643178 | 0.90796865  | 0.934594754 | no |
| UBE2L3    | -0.004376317 | -0.115539179 | 0.908051047 | 0.934631984 | no |
| LMOD1     | -0.004353784 | -0.114944285 | 0.908522388 | 0.935069519 | no |
| ANLN      | 0.004345147  | 0.114716247  | 0.908703074 | 0.935162355 | no |
| RSP01     | 0.00434505   | 0.114713695  | 0.908705096 | 0.935162355 | no |
| FAM108A1  | 0.004342296  | 0.114640978  | 0.908762714 | 0.935174049 | no |
| C10orf78  | -0.004306287 | -0.11369029  | 0.909516049 | 0.935867574 | no |
| COLQ      | -0.004305657 | -0.113673657 | 0.90952923  | 0.935867574 | no |
| CT47A2    | 0.004302552  | 0.113591682  | 0.909594192 | 0.935886787 | no |
| XPC       | 0.004283688  | 0.113093638  | 0.909988884 | 0.936245242 | no |
| NDUFA11   | 0.004252519  | 0.112270739  | 0.910641067 | 0.936868568 | no |
| LY6G5C    | -0.004246879 | -0.112121847 | 0.910759077 | 0.9369423   | no |
| SNORA58   | -0.00424387  | -0.11204238  | 0.910822062 | 0.936959421 | no |
| LIN28B    | -0.004226768 | -0.111590882 | 0.911179929 | 0.937272556 | no |
| SULT1A2   | -0.004224893 | -0.111541364 | 0.911219179 | 0.937272556 | no |
| TIMM9     | -0.004207192 | -0.111074028 | 0.91158962  | 0.9375151   | no |
| C6orf105  | -0.00420697  | -0.111068179 | 0.911594256 | 0.9375151   | no |
| CBLB      | -0.004205417 | -0.111027185 | 0.911626752 | 0.9375151   | no |
| OR4C11    | -0.004202669 | -0.110954615 | 0.911684278 | 0.9375151   | no |
| DIMT1L    | -0.004202547 | -0.110951392 | 0.911686833 | 0.9375151   | no |
| PPIAL4B   | -0.004197017 | -0.110805403 | 0.911802558 | 0.937586417 | no |
| CABC1     | -0.004188672 | -0.110585082 | 0.911977211 | 0.937718317 | no |
| NUP210L   | 0.004183977  | 0.110461118  | 0.912075482 | 0.937747225 | no |
| SNRPD3    | -0.004182896 | -0.110432599 | 0.91209809  | 0.937747225 | no |
| PRUNE2    | -0.004165047 | -0.109961342 | 0.912471686 | 0.938012046 | no |
| MTIF3     | -0.004163594 | -0.109922987 | 0.912502093 | 0.938012046 | no |
| C8orf22   | 0.00416231   | 0.109889099  | 0.912528959 | 0.938012046 | no |
| FBX028    | -0.004161723 | -0.109873599 | 0.912541247 | 0.938012046 | no |
| F10       | 0.004157472  | 0.109761352  | 0.912630236 | 0.938052512 | no |
| C19orf46  | 0.004155409  | 0.109706897  | 0.912673408 | 0.938052512 | no |
| CDHR3     | 0.004147703  | 0.109503442  | 0.91283471  | 0.938124465 | no |
| PNLDC1    | -0.004147631 | -0.109501544 | 0.912836216 | 0.938124465 | no |
| HMX3      | -0.004140164 | -0.109304405 | 0.912992513 | 0.938152466 | no |
| SF3B1     | -0.004139525 | -0.109287543 | 0.913005883 | 0.938152466 | no |
| 3-Mar     | -0.004138055 | -0.109248725 | 0.913036659 | 0.938152466 | no |
| C18orf54  | -0.004137462 | -0.109233073 | 0.913049068 | 0.938152466 | no |
| MAGEB1    | 0.00412919   | 0.109014663  | 0.913222236 | 0.93828271  | no |
| GUCY2GP   | 0.004126728  | 0.108949675  | 0.913273764 | 0.93828797  | no |
| F13B      | -0.004123011 | -0.108851542 | 0.913351571 | 0.938320227 | no |
| ZNF320    | -0.004119694 | -0.108763973 | 0.913421003 | 0.938336088 | no |
| NDUFS8    | -0.004116916 | -0.108690628 | 0.913479157 | 0.938336088 | no |
| KRTAP2-1  | 0.004112067  | 0.108562605  | 0.913580667 | 0.938336088 | no |
| OLIG3     | -0.004111259 | -0.108541273 | 0.913597582 | 0.938336088 | no |
| LOC339535 | 0.004111188  | 0.108539402  | 0.913599065 | 0.938336088 | no |

|              |              |              |             |             |    |
|--------------|--------------|--------------|-------------|-------------|----|
| MCCC2        | -0.004090473 | -0.107992485 | 0.914032732 | 0.93873381  | no |
| CSH2         | -0.004078624 | -0.107679659 | 0.914280793 | 0.938940878 | no |
| PRPSAP1      | 0.004069728  | 0.107444784  | 0.914467047 | 0.939084456 | no |
| CDK5         | -0.004054716 | -0.107048455 | 0.914781343 | 0.9393595   | no |
| PLAC1L       | -0.0040515   | -0.106963538 | 0.914848686 | 0.939380941 | no |
| SNAR-E       | 0.004044323  | 0.106774062  | 0.91499895  | 0.939487521 | no |
| SNORA50      | 0.00403656   | 0.106569117  | 0.915161485 | 0.939606688 | no |
| OR2B2        | -0.004030086 | -0.106398182 | 0.915297051 | 0.939686933 | no |
| CCDC88C      | 0.004028388  | 0.106353361  | 0.915332597 | 0.939686933 | no |
| KRT71        | -0.00401825  | -0.106085709 | 0.915544873 | 0.939857134 | no |
| IL28A        | -0.004011029 | -0.105895047 | 0.915696092 | 0.939879646 | no |
| TRIM32       | 0.004010659  | 0.105885293  | 0.915703828 | 0.939879646 | no |
| UBR1         | 0.004008972  | 0.105840756  | 0.915739153 | 0.939879646 | no |
| SCGB1D1      | 0.004008323  | 0.105823609  | 0.915752752 | 0.939879646 | no |
| PRKCI        | 0.004000743  | 0.105623503  | 0.915911466 | 0.939994823 | no |
| YWHAB        | -0.003997914 | -0.105548793 | 0.915970723 | 0.940007922 | no |
| UBP1         | -0.00397184  | -0.104860424 | 0.91651673  | 0.940503938 | no |
| RNF17        | -0.003968219 | -0.104764818 | 0.916592567 | 0.940503938 | no |
| HNRNPCL1     | -0.003968169 | -0.104763504 | 0.916593609 | 0.940503938 | no |
| CRYGD        | 0.003963295  | 0.104634816  | 0.916695689 | 0.940560946 | no |
| CMTM1        | -0.003951682 | -0.104328205 | 0.916938908 | 0.940762755 | no |
| PPIAL4D      | 0.003943253  | 0.104105682  | 0.917111543 | 0.940896116 | no |
| C2orf54      | -0.003937915 | -0.103964747 | 0.917227232 | 0.94096307  | no |
| MAGEB10      | 0.003932072  | 0.103810489  | 0.917349605 | 0.94104086  | no |
| SPANXN4      | -0.003906288 | -0.103129743 | 0.917889664 | 0.941547094 | no |
| MRPS21       | -0.003900982 | -0.102989664 | 0.918000798 | 0.941613319 | no |
| MRPS36       | -0.003898088 | -0.102913263 | 0.918061413 | 0.941627722 | no |
| SDR9C7       | -0.003891765 | -0.102746328 | 0.918193857 | 0.941709426 | no |
| SLC2A12      | -0.003889838 | -0.102695444 | 0.918234228 | 0.941709426 | no |
| DIRC2        | -0.003886301 | -0.102602054 | 0.918308323 | 0.941737646 | no |
| RNF216       | -0.003881402 | -0.102472718 | 0.91841094  | 0.94179511  | no |
| GJB4         | -0.003859831 | -0.101903231 | 0.918862793 | 0.942210679 | no |
| PSG11        | -0.003851885 | -0.101693449 | 0.919029249 | 0.942333571 | no |
| DKFZP686I152 | -0.003846257 | -0.101544863 | 0.91914715  | 0.942406668 | no |
| FAM92A3      | -0.00384117  | -0.101410557 | 0.919253721 | 0.942440907 | no |
| NDFIP1       | 0.003840213  | 0.101385288  | 0.919273772 | 0.942440907 | no |
| MEF2C        | -0.003836078 | -0.101276114 | 0.919360403 | 0.94248193  | no |
| C11orf9      | -0.003829659 | -0.101106642 | 0.919494882 | 0.942560099 | no |
| HOXA11AS     | -0.003824088 | -0.100959559 | 0.919611597 | 0.942560099 | no |
| KRT1         | 0.003822175  | 0.100909065  | 0.919651666 | 0.942560099 | no |
| ANKRD54      | 0.003821632  | 0.10089471   | 0.919663058 | 0.942560099 | no |
| PPP1R3A      | 0.003821312  | 0.100886273  | 0.919669753 | 0.942560099 | no |
| DNAH8        | -0.003808497 | -0.100547946 | 0.919938235 | 0.942787471 | no |
| C8orf74      | -0.003801341 | -0.100359018 | 0.920088164 | 0.942859437 | no |
| CDCA5        | 0.003799373  | 0.100307054  | 0.920129402 | 0.942859437 | no |
| EXOC4        | -0.003797131 | -0.100247854 | 0.920176382 | 0.942859437 | no |
| PRLH         | -0.003796243 | -0.100224401 | 0.920194995 | 0.942859437 | no |
| SNORA79      | 0.003783875  | 0.099897875  | 0.920454129 | 0.94307716  | no |
| FCN2         | -0.003781223 | -0.099827866 | 0.92050969  | 0.943086293 | no |
| ATP6V1G3     | 0.003767913  | 0.099476451  | 0.920788588 | 0.943315166 | no |
| RAMP1        | 0.003766108  | 0.099428811  | 0.920826398 | 0.943315166 | no |

|              |              |              |             |             |    |
|--------------|--------------|--------------|-------------|-------------|----|
| SNORA2B      | 0.003760649  | 0.099284687  | 0.920940784 | 0.943384545 | no |
| ARC          | -0.003756793 | -0.099182892 | 0.921021576 | 0.943419507 | no |
| YWHAH        | -0.003735466 | -0.098619817 | 0.921468489 | 0.943829471 | no |
| GPRC6A       | 0.003721144  | 0.098241711  | 0.921768607 | 0.944089042 | no |
| PUS7L        | -0.003709565 | -0.09793599  | 0.922011278 | 0.944289753 | no |
| PROL1        | -0.00370537  | -0.097825244 | 0.922099186 | 0.944331949 | no |
| PCYOX1       | 0.003687713  | 0.097359089  | 0.922469221 | 0.944663056 | no |
| HS3ST6       | 0.003685427  | 0.097298716  | 0.922517147 | 0.944664287 | no |
| LOC152024    | 0.00365992   | 0.096625316  | 0.923051728 | 0.94516383  | no |
| ZNF791       | -0.003648646 | -0.096327671 | 0.923288024 | 0.945357909 | no |
| C20orf144    | 0.003632432  | 0.095899602  | 0.923627876 | 0.945657993 | no |
| BPESC1       | -0.003625367 | -0.095713074 | 0.923775968 | 0.945761724 | no |
| C12orf40     | -0.003614102 | -0.09541565  | 0.924012111 | 0.945955586 | no |
| PLIN4        | 0.003599301  | 0.095024895  | 0.924322364 | 0.946225294 | no |
| NOBOX        | 0.003594425  | 0.094896157  | 0.924424583 | 0.946282022 | no |
| TMTC4        | -0.003565623 | -0.094135747 | 0.925028379 | 0.946852155 | no |
| PGA4         | 0.003560708  | 0.094005985  | 0.925131419 | 0.946909686 | no |
| COX7A2       | 0.003556952  | 0.093906834  | 0.925210153 | 0.946942334 | no |
| EFCAB2       | -0.003549922 | -0.093721211 | 0.925357554 | 0.947045256 | no |
| SOHLH2       | 0.003539141  | 0.09343658   | 0.925583583 | 0.947228633 | no |
| TMEM233      | -0.003525632 | -0.093079935 | 0.925866806 | 0.947460975 | no |
| ATM          | 0.003523842  | 0.093032672  | 0.92590434  | 0.947460975 | no |
| VAPB         | 0.003518021  | 0.092879007  | 0.926026374 | 0.947537893 | no |
| RPS8         | 0.00351375   | 0.092766241  | 0.926115928 | 0.947581571 | no |
| KRT84        | -0.003508641 | -0.092631362 | 0.926223046 | 0.947643213 | no |
| C16orf82     | -0.003501344 | -0.092438709 | 0.926376048 | 0.947751793 | no |
| COX8A        | -0.003498629 | -0.092367023 | 0.92643298  | 0.94776208  | no |
| AVIL         | -0.003484388 | -0.091991054 | 0.92673158  | 0.947965662 | no |
| AGPAT6       | 0.003482585  | 0.091943448  | 0.92676939  | 0.947965662 | no |
| C7orf55      | -0.00348243  | -0.091939353 | 0.926772642 | 0.947965662 | no |
| SAMD7        | 0.003475849  | 0.091765605  | 0.926910639 | 0.948047644 | no |
| SDHAP1       | -0.003474135 | -0.091720362 | 0.926946573 | 0.948047644 | no |
| FBF1         | 0.003471452  | 0.091649522  | 0.927002837 | 0.948057229 | no |
| FAM3A        | 0.003460975  | 0.091372913  | 0.927222537 | 0.948233953 | no |
| ITLN1        | 0.00345689   | 0.09126505   | 0.92730821  | 0.948273602 | no |
| PSG10        | -0.003448761 | -0.091050434 | 0.927478677 | 0.948399954 | no |
| JAG2         | 0.003446104  | 0.090980296  | 0.927534387 | 0.948408954 | no |
| NCRNA00157   | -0.003442493 | -0.090884968 | 0.927610107 | 0.948438411 | no |
| DNAJC25-GNG1 | 0.003431126  | 0.090584848  | 0.927848497 | 0.94863418  | no |
| C21orf29     | 0.003422266  | 0.090350937  | 0.928034301 | 0.948742911 | no |
| HSD3B1       | -0.003421579 | -0.090332815 | 0.928048696 | 0.948742911 | no |
| NFXL1        | 0.00340842   | 0.089985381  | 0.928324684 | 0.948977068 | no |
| DAXX         | 0.003393611  | 0.089594429  | 0.92863525  | 0.94914881  | no |
| ZNF771       | -0.00339289  | -0.089575374 | 0.928650387 | 0.94914881  | no |
| PISD         | -0.003391899 | -0.089549229 | 0.928671157 | 0.94914881  | no |
| ERMN         | -0.003391455 | -0.089537505 | 0.92868047  | 0.94914881  | no |
| LOC644145    | -0.003385018 | -0.089367545 | 0.928815488 | 0.949238818 | no |
| PKD2L2       | 0.003370659  | 0.088988455  | 0.929116648 | 0.949498605 | no |
| LCE1C        | 0.003343314  | 0.08826652   | 0.929690202 | 0.95003672  | no |
| ETV3         | 0.003316738  | 0.08756489   | 0.930247659 | 0.950519343 | no |
| UGT2B10      | 0.003316316  | 0.087553744  | 0.930256516 | 0.950519343 | no |

|           |              |              |             |             |    |
|-----------|--------------|--------------|-------------|-------------|----|
| C3orf22   | 0.003298056  | 0.087071657  | 0.930639563 | 0.950862678 | no |
| C6orf106  | -0.003292311 | -0.086919979 | 0.930760083 | 0.950937761 | no |
| HPDL      | -0.003289687 | -0.086850691 | 0.930815138 | 0.950945956 | no |
| HIGD1C    | -0.003282335 | -0.086656599 | 0.930969363 | 0.951055459 | no |
| ALK       | -0.003269126 | -0.086307872 | 0.931246468 | 0.951290476 | no |
| MRS2P2    | 0.00325519   | 0.085939924  | 0.931538854 | 0.951541078 | no |
| KCTD7     | -0.003250668 | -0.085820563 | 0.931633706 | 0.951570939 | no |
| OR10K1    | -0.003249309 | -0.085784683 | 0.931662218 | 0.951570939 | no |
| OR52E6    | 0.00324134   | 0.085574289  | 0.931829413 | 0.951693628 | no |
| DEFB105A  | -0.003236277 | -0.085440616 | 0.93193564  | 0.951754042 | no |
| ATP6VOC   | -0.00322143  | -0.085048641 | 0.932247144 | 0.952024081 | no |
| 11-Sep    | 0.003213336  | 0.084834939  | 0.932416977 | 0.952149424 | no |
| CCDC15    | -0.003199705 | -0.084475069 | 0.932702981 | 0.95236722  | no |
| SLC6A14   | 0.003198681  | 0.084448031  | 0.93272447  | 0.95236722  | no |
| RIF1      | 0.00318322   | 0.084039833  | 0.933048893 | 0.952650365 | no |
| HDGF      | -0.003167741 | -0.083631191 | 0.93337368  | 0.952933852 | no |
| MAOA      | -0.003156076 | -0.083323203 | 0.933618475 | 0.953135645 | no |
| KCNG4     | -0.00315368  | -0.083259956 | 0.933668746 | 0.953138839 | no |
| CA4       | -0.003141729 | -0.082944441 | 0.933919532 | 0.953346718 | no |
| CELA2A    | 0.003129074  | 0.082610332  | 0.934185103 | 0.953569668 | no |
| DNAJA4    | 0.003117717  | 0.082310487  | 0.934423447 | 0.953764804 | no |
| FRS2      | -0.003092571 | -0.081646596 | 0.934951186 | 0.954225727 | no |
| REG1P     | -0.003091702 | -0.081623663 | 0.934969416 | 0.954225727 | no |
| CLDN5     | 0.003087968  | 0.081525096  | 0.935047772 | 0.954257526 | no |
| C18orf2   | -0.003071435 | -0.081088598 | 0.935394771 | 0.954563471 | no |
| SFRS3     | 0.003066822  | 0.080966806  | 0.935491594 | 0.954580278 | no |
| HSPH1     | 0.003066151  | 0.0809491    | 0.935505669 | 0.954580278 | no |
| MAP3K15   | 0.003044736  | 0.080383714  | 0.935955154 | 0.954984793 | no |
| LOC285692 | 0.003042763  | 0.08033162   | 0.93599657  | 0.954984793 | no |
| KIAA1841  | -0.003029136 | -0.079971862 | 0.93628259  | 0.95522841  | no |
| SYCN      | -0.003022131 | -0.079786925 | 0.936429626 | 0.955330213 | no |
| SLFNL1    | 0.003017712  | 0.079670245  | 0.936522394 | 0.955376646 | no |
| PYRL      | 0.00301458   | 0.079587564  | 0.936588131 | 0.955395501 | no |
| PTGES3    | -0.003007271 | -0.079394594 | 0.936741557 | 0.955503799 | no |
| GOLGA6D   | -0.002994381 | -0.079054284 | 0.937012136 | 0.955731579 | no |
| BARX1     | 0.002976001  | 0.078569036  | 0.937397967 | 0.956076886 | no |
| STARD4    | -0.002967111 | -0.078334311 | 0.937584607 | 0.956219007 | no |
| WDR72     | -0.002963365 | -0.078235422 | 0.93766324  | 0.956250965 | no |
| SEMG2     | -0.002959034 | -0.078121071 | 0.937754167 | 0.956295458 | no |
| KISS1     | 0.00294912   | 0.077859344  | 0.937962286 | 0.956459449 | no |
| C12orf66  | -0.002943909 | -0.077721772 | 0.938071681 | 0.956518873 | no |
| GSDMC     | -0.002941837 | -0.077667067 | 0.938115181 | 0.956518873 | no |
| CLEC9A    | -0.002935489 | -0.077499472 | 0.938248452 | 0.956606516 | no |
| OR6W1P    | -0.002929474 | -0.077340656 | 0.938374745 | 0.956682556 | no |
| MGC4473   | -0.002927429 | -0.077286677 | 0.93841767  | 0.956682556 | no |
| MSTO2P    | -0.002908407 | -0.07678446  | 0.938817048 | 0.95704145  | no |
| HECA      | -0.002905979 | -0.07672037  | 0.938868016 | 0.957045153 | no |
| TDGF3     | -0.002899474 | -0.076548631 | 0.939004592 | 0.957136115 | no |
| CASZ1     | -0.00288184  | -0.076083075 | 0.939374838 | 0.957465239 | no |
| NEUROG1   | -0.002862478 | -0.075571909 | 0.939781371 | 0.957822013 | no |
| CCDC159   | 0.002860657  | 0.075523816  | 0.93981962  | 0.957822013 | no |

|           |              |              |             |             |    |
|-----------|--------------|--------------|-------------|-------------|----|
| SMC2      | -0.002855391 | -0.075384785 | 0.939930195 | 0.95788642  | no |
| IRS1      | -0.002838371 | -0.074935444 | 0.940287577 | 0.95820233  | no |
| PIH1D1    | -0.002820563 | -0.074465303 | 0.940661515 | 0.958535079 | no |
| GRAMD4    | -0.002805237 | -0.074060678 | 0.940983353 | 0.958814707 | no |
| SLC18A3   | -0.002798736 | -0.07388905  | 0.941119869 | 0.958888712 | no |
| NPPB      | -0.002797262 | -0.073850118 | 0.941150836 | 0.958888712 | no |
| C15orf38  | -0.002793611 | -0.073753728 | 0.941227507 | 0.958918505 | no |
| CSTL1     | 0.002785047  | 0.073527645  | 0.941407342 | 0.959053393 | no |
| SDCCAG8   | 0.002781454  | 0.07343278   | 0.941482802 | 0.959081941 | no |
| TMEM207   | -0.002774464 | -0.07324824  | 0.941629594 | 0.95916898  | no |
| CCDC132   | 0.002772868  | 0.073206085  | 0.941663126 | 0.95916898  | no |
| TSPAN18   | 0.002766344  | 0.073033854  | 0.941800131 | 0.959206124 | no |
| PROZ      | -0.002765323 | -0.073006896 | 0.941821575 | 0.959206124 | no |
| CRELD1    | 0.002764354  | 0.072981318  | 0.941841922 | 0.959206124 | no |
| RABGAP1L  | -0.002757491 | -0.072800122 | 0.94198606  | 0.959231958 | no |
| SARNP     | 0.002756591  | 0.072776374  | 0.942004951 | 0.959231958 | no |
| ATP2B1    | 0.002756369  | 0.072770502  | 0.942009621 | 0.959231958 | no |
| CYB5D2    | 0.002741265  | 0.072371747  | 0.942326831 | 0.959460334 | no |
| GUCY2E    | -0.002741171 | -0.07236926  | 0.942328809 | 0.959460334 | no |
| MAGEA9B   | -0.002715094 | -0.07168079  | 0.942876507 | 0.959946379 | no |
| COQ4      | 0.002711345  | 0.071581838  | 0.942955228 | 0.959946379 | no |
| FOXI1     | -0.002709652 | -0.071537118 | 0.942990806 | 0.959946379 | no |
| TBX10     | 0.0027094    | 0.07153047   | 0.942996095 | 0.959946379 | no |
| ZSWIM2    | 0.002702071  | 0.071336976  | 0.943150031 | 0.960054744 | no |
| ING3      | 0.002696786  | 0.071197443  | 0.94326104  | 0.960119403 | no |
| SLC35E3   | 0.002688713  | 0.070984313  | 0.943430603 | 0.960201615 | no |
| CFTR      | 0.002688418  | 0.070976532  | 0.943436793 | 0.960201615 | no |
| CCL24     | 0.0026853    | 0.070894207  | 0.94350229  | 0.960217857 | no |
| ODZ1      | 0.002683136  | 0.070837083  | 0.943547738 | 0.960217857 | no |
| C15orf2   | 0.002673865  | 0.070592313  | 0.943742478 | 0.960367698 | no |
| NLGN4Y    | 0.002656144  | 0.070124454  | 0.944114717 | 0.960660874 | no |
| SIM1      | -0.002655625 | -0.070110764 | 0.94412561  | 0.960660874 | no |
| RAD21L1   | 0.002643963  | 0.069802874  | 0.944370581 | 0.960861779 | no |
| MIF4GD    | -0.002637605 | -0.06963502  | 0.944504136 | 0.960889413 | no |
| ALLC      | 0.002636948  | 0.069617657  | 0.944517951 | 0.960889413 | no |
| BPNT1     | -0.002635883 | -0.069589543 | 0.94454032  | 0.960889413 | no |
| SMG5      | -0.002625607 | -0.069318256 | 0.944756176 | 0.961060648 | no |
| LOC541473 | 0.002621079  | 0.069198722  | 0.944851288 | 0.961109043 | no |
| KRTAP10-7 | -0.002616354 | -0.069073959 | 0.944950561 | 0.961161666 | no |
| LPA       | -0.002611595 | -0.068948321 | 0.945050531 | 0.961214993 | no |
| MED11     | 0.002600647  | 0.068659296  | 0.945280511 | 0.961400542 | no |
| LOC441455 | 0.002595505  | 0.068523524  | 0.945388547 | 0.961441185 | no |
| DCAF12L2  | 0.002594218  | 0.068489551  | 0.94541558  | 0.961441185 | no |
| GABRP     | 0.002577389  | 0.068045255  | 0.945769125 | 0.961701495 | no |
| C8orf38   | 0.002576424  | 0.068019773  | 0.945789402 | 0.961701495 | no |
| SCARNA15  | 0.002575241  | 0.067988545  | 0.945814251 | 0.961701495 | no |
| ZNF498    | -0.002550608 | -0.067338204 | 0.946331775 | 0.962179322 | no |
| RWDD1     | -0.002541088 | -0.067086864 | 0.94653179  | 0.962330809 | no |
| UBFD1     | -0.002538986 | -0.067031359 | 0.946575961 | 0.962330809 | no |
| ATG16L2   | -0.002523312 | -0.066617569 | 0.946905262 | 0.962617186 | no |
| STK16     | -0.002516814 | -0.06644602  | 0.947041787 | 0.96270757  | no |

|           |              |              |             |             |    |
|-----------|--------------|--------------|-------------|-------------|----|
| BTF3L4    | 0.002511516  | 0.066306121  | 0.947153124 | 0.962772341 | no |
| TMEM201   | -0.002502944 | -0.066079819 | 0.947333227 | 0.962907002 | no |
| MT1F      | 0.00249607   | 0.065898347  | 0.947477653 | 0.962991372 | no |
| TOMM22    | -0.002492658 | -0.065808252 | 0.947549357 | 0.962991372 | no |
| PPIEL     | 0.002492029  | 0.065791659  | 0.947562563 | 0.962991372 | no |
| TSPAN16   | 0.002489926  | 0.065736134  | 0.947606754 | 0.962991372 | no |
| MCART2    | -0.002479753 | -0.065467551 | 0.947820514 | 0.963160191 | no |
| OR52A1    | 0.002473031  | 0.06529009   | 0.947961754 | 0.963255302 | no |
| DDX11L2   | -0.002468923 | -0.065181635 | 0.948048073 | 0.9632946   | no |
| TRIB2     | -0.002457739 | -0.064886371 | 0.948283077 | 0.963484962 | no |
| C15orf33  | 0.002451022  | 0.064709019  | 0.948424236 | 0.96357996  | no |
| AGAP11    | -0.002440324 | -0.064426591 | 0.94864903  | 0.963759916 | no |
| MYPN      | 0.002423913  | 0.063993327  | 0.948993888 | 0.964061824 | no |
| FMO6P     | 0.002413812  | 0.063726653  | 0.949206153 | 0.964229011 | no |
| UROC1     | -0.002407256 | -0.063553558 | 0.949343934 | 0.964320521 | no |
| AIMP2     | -0.002389876 | -0.063094724 | 0.949709165 | 0.964643049 | no |
| ALX3      | 0.00238608   | 0.062994496  | 0.949788947 | 0.964675622 | no |
| RBM28     | -0.002380512 | -0.062847501 | 0.949905959 | 0.964746002 | no |
| TCHHL1    | -0.002370666 | -0.062587564 | 0.950112876 | 0.964907681 | no |
| P2RX2     | -0.002363842 | -0.062407405 | 0.95025629  | 0.965004855 | no |
| SPP2      | -0.002360085 | -0.06230821  | 0.950335253 | 0.965036572 | no |
| LOC284632 | 0.00235544   | 0.062185567  | 0.950432884 | 0.965082845 | no |
| TSPAN12   | -0.002353375 | -0.062131042 | 0.950476289 | 0.965082845 | no |
| KIR3DL3   | -0.002341064 | -0.061806036 | 0.950735015 | 0.965259883 | no |
| GABPA     | 0.002337422  | 0.061709879  | 0.950811563 | 0.965259883 | no |
| CDK11A    | -0.002336817 | -0.061693899 | 0.950824285 | 0.965259883 | no |
| USP45     | -0.002335992 | -0.061672126 | 0.950841618 | 0.965259883 | no |
| ATF6B     | -0.002330677 | -0.061531796 | 0.950953333 | 0.965324822 | no |
| PPAT      | -0.002322695 | -0.061321064 | 0.951121095 | 0.965405995 | no |
| UGT1A7    | -0.002322328 | -0.061311389 | 0.951128797 | 0.965405995 | no |
| SLC2A1    | 0.0023136    | 0.061080967  | 0.951312237 | 0.965543715 | no |
| GNPAT     | -0.002310965 | -0.061011396 | 0.951367623 | 0.965551458 | no |
| PGAM5     | -0.002303731 | -0.060820398 | 0.95151968  | 0.965657308 | no |
| BIRC8     | -0.002288642 | -0.060422043 | 0.951836823 | 0.965930678 | no |
| GAGE1     | -0.002276187 | -0.060093215 | 0.95209862  | 0.966147856 | no |
| CYP2C8    | -0.002253276 | -0.059488335 | 0.952580208 | 0.966588038 | no |
| OR4C16    | -0.00224994  | -0.059400277 | 0.952650319 | 0.966610667 | no |
| SF3B4     | 0.002246699  | 0.059314701  | 0.952718453 | 0.966631289 | no |
| FLJ10357  | -0.00223532  | -0.059014276 | 0.952957652 | 0.966825462 | no |
| B3GALT1   | -0.002228555 | -0.058835681 | 0.953099852 | 0.966884337 | no |
| CCL4L2    | 0.002228009  | 0.058821268  | 0.953111329 | 0.966884337 | no |
| PSEN1     | 0.002207621  | 0.058283007  | 0.953539908 | 0.967270576 | no |
| C12orf77  | -0.002190081 | -0.057819931 | 0.953908634 | 0.967555302 | no |
| ZNF672    | -0.002189359 | -0.057800864 | 0.953923816 | 0.967555302 | no |
| ISM2      | -0.002187439 | -0.057750197 | 0.953964161 | 0.967555302 | no |
| C11orf34  | -0.002183481 | -0.057645681 | 0.954047384 | 0.967591172 | no |
| VPS26A    | -0.002162965 | -0.057104059 | 0.954478669 | 0.967980023 | no |
| API5      | 0.002156164  | 0.056924492  | 0.954621658 | 0.968065307 | no |
| OR9A2     | -0.002153714 | -0.056859817 | 0.954673159 | 0.968065307 | no |
| TMEM187   | -0.002152133 | -0.056818064 | 0.954706408 | 0.968065307 | no |
| TTLL7     | 0.00214954   | 0.056749623  | 0.954760909 | 0.968072019 | no |



|           |              |              |             |             |    |
|-----------|--------------|--------------|-------------|-------------|----|
| HACL1     | 0.002130158  | 0.056237915  | 0.955168394 | 0.968436618 | no |
| FM02      | 0.002109507  | 0.055692698  | 0.955602577 | 0.968777473 | no |
| TCEAL7    | 0.002108744  | 0.055672556  | 0.955618617 | 0.968777473 | no |
| OR4B1     | -0.002107331 | -0.055635247 | 0.955648329 | 0.968777473 | no |
| MAGEA11   | 0.002094939  | 0.055308108  | 0.955908852 | 0.968880475 | no |
| TGM3      | -0.002094848 | -0.055305701 | 0.95591077  | 0.968880475 | no |
| LOC595101 | 0.002093678  | 0.055274819  | 0.955935363 | 0.968880475 | no |
| CYP4F12   | -0.002093336 | -0.055265781 | 0.95594256  | 0.968880475 | no |
| C17orf61  | 0.002091102  | 0.055206785  | 0.955989544 | 0.968880475 | no |
| CRYBA2    | 0.002083001  | 0.054992925  | 0.95615986  | 0.969004514 | no |
| TM4SF4    | -0.002077391 | -0.054844805 | 0.956277821 | 0.969050082 | no |
| HCRT      | 0.002076303  | 0.054816097  | 0.956300684 | 0.969050082 | no |
| PRHOXNB   | 0.002056237  | 0.054286331  | 0.956722596 | 0.969398629 | no |
| GYLTL1B   | -0.002055384 | -0.054263799 | 0.956740541 | 0.969398629 | no |
| NFKBIA    | 0.002052132  | 0.05417794   | 0.956808921 | 0.969419331 | no |
| ATP5I     | -0.002035068 | -0.05372744  | 0.957167716 | 0.96973426  | no |
| ACHE      | -0.002025492 | -0.053474625 | 0.957369071 | 0.969889656 | no |
| ANAPC4    | -0.001995927 | -0.05269408  | 0.957990754 | 0.970470842 | no |
| MAP3K4    | 0.001987068  | 0.052460213  | 0.958177029 | 0.970610911 | no |
| NBPF6     | 0.00197536   | 0.052151097  | 0.958423241 | 0.970811678 | no |
| BARHL2    | -0.001972402 | -0.052072999 | 0.958485447 | 0.97082605  | no |
| SLURP1    | -0.001963316 | -0.05183314  | 0.9586765   | 0.970928172 | no |
| HERC4     | -0.00196304  | -0.051825836 | 0.958682318 | 0.970928172 | no |
| UGT1A1    | 0.001960751  | 0.051765419  | 0.958730442 | 0.970928275 | no |
| SPG20     | 0.001935885  | 0.051108919  | 0.959253372 | 0.971392767 | no |
| TSGA13    | -0.001932159 | -0.05101056  | 0.959331721 | 0.971392767 | no |
| OTOR      | 0.001932087  | 0.051008657  | 0.959333236 | 0.971392767 | no |
| C17orf48  | 0.001923659  | 0.050786144  | 0.959510483 | 0.971523585 | no |
| ATP50     | 0.001917937  | 0.050635077  | 0.959630818 | 0.971596769 | no |
| ALG1L2    | -0.001914512 | -0.05054465  | 0.95970285  | 0.971621043 | no |
| C1orf68   | -0.001894222 | -0.050008973 | 0.960129565 | 0.972004384 | no |
| VAX1      | -0.001882023 | -0.049686913 | 0.96038612  | 0.972215431 | no |
| AHNAK     | -0.001866303 | -0.049271894 | 0.960716733 | 0.972501423 | no |
| ZCCHC11   | 0.00186142   | 0.049142981  | 0.96081943  | 0.972556685 | no |
| TXNDC6    | 0.001857929  | 0.04905081   | 0.960892856 | 0.972582316 | no |
| SNORA75   | 0.001853913  | 0.048944791  | 0.960977315 | 0.972619111 | no |
| SNORA66   | -0.001851471 | -0.048880328 | 0.961028669 | 0.972622397 | no |
| OR1D4     | 0.001837153  | 0.04850231   | 0.961329818 | 0.972878479 | no |
| FUNDC2    | -0.001832521 | -0.048380019 | 0.961427243 | 0.972928374 | no |
| PFKFB2    | 0.001826284  | 0.048215371  | 0.961558413 | 0.972974969 | no |
| F12       | 0.001825756  | 0.048201409  | 0.961569535 | 0.972974969 | no |
| SNORA27   | 0.001804566  | 0.047641999  | 0.962015207 | 0.973377212 | no |
| CT47A9    | -0.001794162 | -0.047367315 | 0.962234048 | 0.9735012   | no |
| SNAR-G2   | -0.001794162 | -0.047367315 | 0.962234048 | 0.9735012   | no |
| CDY1      | 0.001772701  | 0.046800734  | 0.96268545  | 0.973909153 | no |
| KDM5D     | 0.001755534  | 0.046347495  | 0.96304656  | 0.974185289 | no |
| TAL1      | 0.001755144  | 0.046337189  | 0.963054771 | 0.974185289 | no |
| BPHL      | 0.001745819  | 0.046091009  | 0.963250914 | 0.97433495  | no |
| DLX6AS    | -0.001726059 | -0.04556932  | 0.963666575 | 0.97470663  | no |
| DEFB118   | 0.001704516  | 0.045000569  | 0.964119745 | 0.975031137 | no |
| CPNE4     | -0.001702231 | -0.044940265 | 0.964167795 | 0.975031137 | no |

|            |              |              |             |             |    |
|------------|--------------|--------------|-------------|-------------|----|
| TTY6B      | 0.001701729  | 0.04492699   | 0.964178372 | 0.975031137 | no |
| SCOC       | 0.001701636  | 0.044924557  | 0.96418031  | 0.975031137 | no |
| CCDC83     | -0.001684649 | -0.044476069 | 0.964537666 | 0.975343107 | no |
| C15orf5    | 0.001678048  | 0.044301812  | 0.964676516 | 0.975343107 | no |
| C3orf14    | 0.001676477  | 0.044260319  | 0.964709579 | 0.975343107 | no |
| ZNF841     | -0.001676158 | -0.044251903 | 0.964716284 | 0.975343107 | no |
| C14orf2    | 0.001673543  | 0.044182874  | 0.964771288 | 0.975343107 | no |
| KRTAP7-1   | -0.001673212 | -0.044174128 | 0.964778257 | 0.975343107 | no |
| CCL3L1     | -0.001662036 | -0.043879075 | 0.965013362 | 0.975532008 | no |
| SRD5A2     | -0.001657445 | -0.043757876 | 0.965109937 | 0.975580857 | no |
| RDH8       | 0.001653275  | 0.043647771  | 0.965197673 | 0.975620766 | no |
| RPS3A      | -0.001645928 | -0.043453811 | 0.965352228 | 0.975728208 | no |
| DMRTC2     | -0.001639783 | -0.04329156  | 0.965481518 | 0.975810105 | no |
| PTPRG      | -0.00162508  | -0.042903387 | 0.965790836 | 0.976033211 | no |
| C8orf56    | -0.0016247   | -0.042893375 | 0.965798814 | 0.976033211 | no |
| MMGT1      | -0.001608838 | -0.042474592 | 0.966132531 | 0.976321663 | no |
| C18orf26   | -0.001595279 | -0.042116639 | 0.966417778 | 0.976561107 | no |
| ACTL7B     | -0.001589676 | -0.041968711 | 0.966535661 | 0.976631415 | no |
| WDR90      | 0.001585936  | 0.04186996   | 0.966614355 | 0.97666212  | no |
| CAD        | 0.001572476  | 0.041514615  | 0.966897531 | 0.976899419 | no |
| SLC16A8    | 0.001568951  | 0.041421539  | 0.966971704 | 0.97692554  | no |
| KRTAP3-3   | -0.0015596   | -0.041174671 | 0.967168438 | 0.977008211 | no |
| NCRNA00099 | 0.001557167  | 0.041110432  | 0.967219631 | 0.977008211 | no |
| OR10V1     | 0.001556125  | 0.041082926  | 0.967241552 | 0.977008211 | no |
| MARS2      | 0.001555874  | 0.041076306  | 0.967246827 | 0.977008211 | no |
| UGT2B7     | 0.001532172  | 0.040450555  | 0.96774551  | 0.977463092 | no |
| OR5AU1     | -0.001523165 | -0.040212764 | 0.967935017 | 0.977605664 | no |
| 14-Sep     | -0.001519814 | -0.040124291 | 0.968005526 | 0.977628039 | no |
| HIST1H4G   | 0.0015118    | 0.03991271   | 0.968174148 | 0.977749496 | no |
| FLJ43859   | 0.001494497  | 0.039455904  | 0.968538208 | 0.978057411 | no |
| ENKUR      | -0.001492711 | -0.039408738 | 0.968575798 | 0.978057411 | no |
| OR52B2     | -0.001488074 | -0.039286317 | 0.968673365 | 0.978107082 | no |
| GPR110     | 0.001481219  | 0.039105349  | 0.968817594 | 0.978203861 | no |
| CLDN17     | 0.001461097  | 0.038574109  | 0.969240991 | 0.978582489 | no |
| SCFD2      | 0.001442979  | 0.038095765  | 0.969622236 | 0.978918524 | no |
| GPR64      | 0.001439541  | 0.038005006  | 0.969694573 | 0.978942671 | no |
| SNORA61    | -0.001435191 | -0.037890168 | 0.969786101 | 0.978986189 | no |
| OCRL       | 0.001430926  | 0.037777556  | 0.969875856 | 0.979027913 | no |
| C4orf51    | -0.001427434 | -0.037685377 | 0.969949326 | 0.979053194 | no |
| GPR119     | 0.001412747  | 0.037297628  | 0.970258376 | 0.979277625 | no |
| TTY14      | 0.001412264  | 0.037284874  | 0.970268542 | 0.979277625 | no |
| CBWD5      | -0.001407261 | -0.037152787 | 0.970373821 | 0.979334993 | no |
| MGC16121   | -0.001399803 | -0.036955886 | 0.970530761 | 0.979444491 | no |
| LRRC3      | 0.001395794  | 0.036850049  | 0.970615119 | 0.979457515 | no |
| BPIL2      | 0.001394585  | 0.036818134  | 0.970640557 | 0.979457515 | no |
| OR4S2      | 0.001382141  | 0.0364896    | 0.970902419 | 0.97967286  | no |
| DEFB135    | 0.001378759  | 0.036400307  | 0.970973591 | 0.979695781 | no |
| ZNF551     | -0.001368202 | -0.03612159  | 0.971195749 | 0.979857872 | no |
| TOP3A      | -0.001366518 | -0.036077155 | 0.971231168 | 0.979857872 | no |
| C1orf159   | -0.001355019 | -0.035773557 | 0.971473161 | 0.98005311  | no |
| SLC29A1    | 0.001352239  | 0.035700168  | 0.971531658 | 0.980063221 | no |

|              |              |              |             |             |    |
|--------------|--------------|--------------|-------------|-------------|----|
| C9           | 0.001342092  | 0.035432265  | 0.971745202 | 0.980191581 | no |
| EDN2         | -0.001341585 | -0.035418889 | 0.971755864 | 0.980191581 | no |
| PLEKHB2      | -0.001337499 | -0.035311008 | 0.971841856 | 0.980229416 | no |
| MFAP1        | -0.001328069 | -0.035062071 | 0.972040284 | 0.9803506   | no |
| HRC          | 0.001326774  | 0.03502788   | 0.972067539 | 0.9803506   | no |
| GSTTP1       | 0.001324877  | 0.034977785  | 0.97210747  | 0.9803506   | no |
| GDF6         | -0.001315747 | -0.03473674  | 0.97229961  | 0.980495462 | no |
| OR4D10       | -0.001302469 | -0.034386184 | 0.972579045 | 0.980722902 | no |
| OR4K5        | 0.00130042   | 0.034332092  | 0.972622164 | 0.980722902 | no |
| RSPH6A       | 0.001293377  | 0.034146165  | 0.972770372 | 0.980823428 | no |
| SULT1C3      | 0.001289978  | 0.034056435  | 0.972841899 | 0.980846632 | no |
| AMBN         | -0.001283135 | -0.033875774 | 0.97298591  | 0.980911773 | no |
| CDKAL1       | 0.001279096  | 0.033769126  | 0.973070924 | 0.980911773 | no |
| IFNA17       | 0.001278044  | 0.033741359  | 0.973093058 | 0.980911773 | no |
| IFFO2        | -0.001277036 | -0.033714746 | 0.973114273 | 0.980911773 | no |
| CLIC6        | -0.001275382 | -0.033671065 | 0.973149092 | 0.980911773 | no |
| ZNF571       | -0.001254589 | -0.033122125 | 0.973586681 | 0.98130393  | no |
| GPR50        | -0.001236714 | -0.032650224 | 0.973962865 | 0.981634158 | no |
| CRYBB3       | -0.001210754 | -0.031964859 | 0.974509226 | 0.982096118 | no |
| CNBD1        | 0.00121032   | 0.031953394  | 0.974518366 | 0.982096118 | no |
| GSTTP2       | 0.001204337  | 0.031795444  | 0.974644283 | 0.982130834 | no |
| BICD2        | 0.001204067  | 0.031788312  | 0.974649968 | 0.982130834 | no |
| CRIPT        | -0.001186411 | -0.03132218  | 0.975021569 | 0.982411509 | no |
| TRA2A        | -0.001183485 | -0.031244929 | 0.975083154 | 0.982411509 | no |
| TTY7         | -0.001180316 | -0.031161263 | 0.975149853 | 0.982411509 | no |
| ALPPL2       | 0.001179977  | 0.031152304  | 0.975156995 | 0.982411509 | no |
| N4BP2        | -0.00117929  | -0.03113416  | 0.97517146  | 0.982411509 | no |
| TMC1         | -0.001145973 | -0.03025458  | 0.975872681 | 0.98299908  | no |
| C2orf42      | -0.001145375 | -0.03023878  | 0.975885277 | 0.98299908  | no |
| KRTAP4-11    | -0.001144649 | -0.030219609 | 0.975900561 | 0.98299908  | no |
| SMAD2        | 0.001121988  | 0.029621345  | 0.976377521 | 0.983375735 | no |
| KLRAQ1       | 0.001118502  | 0.029529328  | 0.976450882 | 0.983375735 | no |
| GMCL1        | 0.001116694  | 0.029481579  | 0.97648895  | 0.983375735 | no |
| FOXN1        | 0.001116642  | 0.029480204  | 0.976490046 | 0.983375735 | no |
| CENPV        | -0.001115328 | -0.029445531 | 0.976517689 | 0.983375735 | no |
| BSCL2        | -0.001109407 | -0.029289213 | 0.976642314 | 0.983452252 | no |
| TRIM6-TRIM34 | -0.001103181 | -0.029124835 | 0.976773366 | 0.983535231 | no |
| POU1F1       | 0.001088321  | 0.028732526  | 0.97708614  | 0.983801174 | no |
| C22orf43     | 0.001079177  | 0.028491115  | 0.97727861  | 0.983945966 | no |
| NCRNA00174   | 0.001072727  | 0.02832082   | 0.977414382 | 0.984033661 | no |
| TCHH         | -0.001063711 | -0.028082795 | 0.977604155 | 0.984175711 | no |
| PSG8         | -0.001059632 | -0.027975097 | 0.977690021 | 0.984213147 | no |
| FAM41AY1     | 0.001055595  | 0.027868532  | 0.977774984 | 0.98424967  | no |
| FIGNL2       | 0.001052985  | 0.027799626  | 0.977829922 | 0.984255967 | no |
| DLX5         | -0.001044133 | -0.027565919 | 0.978016254 | 0.984376928 | no |
| ACAD10       | 0.00104265   | 0.027526768  | 0.97804747  | 0.984376928 | no |
| MID2         | 0.00103952   | 0.02744412   | 0.978113365 | 0.984394246 | no |
| OR52L1       | 0.001032019  | 0.027246086  | 0.978271257 | 0.984504145 | no |
| CEACAM7      | -0.001019237 | -0.026908648 | 0.978540298 | 0.984725885 | no |
| OR2T34       | 0.001007085  | 0.026587818  | 0.9787961   | 0.984911273 | no |
| DNASE1L3     | -0.001005857 | -0.026555395 | 0.978821952 | 0.984911273 | no |

|           |              |              |             |             |    |
|-----------|--------------|--------------|-------------|-------------|----|
| TRPM1     | 0.000997174  | 0.026326152  | 0.979004732 | 0.985011486 | no |
| AMZ2      | 0.000996497  | 0.026308276  | 0.979018984 | 0.985011486 | no |
| OR6S1     | -0.000992596 | -0.026205312 | 0.97910108  | 0.985045065 | no |
| C18orf16  | 0.000980804  | 0.02589397   | 0.979349321 | 0.985245787 | no |
| LOC285501 | -0.000962132 | -0.025401015 | 0.979742372 | 0.985592162 | no |
| C20orf7   | 0.000946112  | 0.024978086  | 0.980079592 | 0.985851231 | no |
| S1PR5     | -0.000944949 | -0.024947368 | 0.980104085 | 0.985851231 | no |
| EMILIN3   | 0.000942949  | 0.024894566  | 0.980146187 | 0.985851231 | no |
| ISL2      | -0.000937255 | -0.024744265 | 0.98026603  | 0.985893699 | no |
| ZNF577    | 0.000931048  | 0.024580387  | 0.980396699 | 0.985893699 | no |
| COMT      | 0.000930959  | 0.024578032  | 0.980398576 | 0.985893699 | no |
| RPS9      | 0.000929466  | 0.024538622  | 0.980430001 | 0.985893699 | no |
| OR5M9     | -0.000929361 | -0.024535833 | 0.980432224 | 0.985893699 | no |
| PAQR5     | -0.000903764 | -0.023860065 | 0.980971058 | 0.986386474 | no |
| OR10A5    | -0.000886982 | -0.023416997 | 0.981324349 | 0.986663419 | no |
| LOC285733 | -0.000886044 | -0.023392248 | 0.981344084 | 0.986663419 | no |
| PDCD2L    | -0.000879787 | -0.023227048 | 0.981475811 | 0.98674679  | no |
| PSG7      | 0.000873947  | 0.023072877  | 0.981598745 | 0.986821313 | no |
| LPAR2     | -0.000856876 | -0.022622192 | 0.981958116 | 0.987130502 | no |
| ISL1      | -0.000854699 | -0.022564717 | 0.982003947 | 0.987130502 | no |
| PDZD3     | 0.000849266  | 0.022421277  | 0.982118325 | 0.987196395 | no |
| OR52J3    | -0.000838873 | -0.022146892 | 0.98233712  | 0.987367233 | no |
| DOK7      | 0.000832313  | 0.021973694  | 0.982475228 | 0.987456958 | no |
| LOC729121 | 0.000814124  | 0.021493508  | 0.982858134 | 0.9877927   | no |
| ABCD4     | -0.000808379 | -0.021341823 | 0.98297909  | 0.987865157 | no |
| PNPLA6    | -0.000801741 | -0.021166564 | 0.983118844 | 0.987956499 | no |
| AIRE      | -0.000782667 | -0.02066302  | 0.983520382 | 0.988244953 | no |
| RTL1      | -0.000781375 | -0.020628901 | 0.98354759  | 0.988244953 | no |
| CRADD     | 0.000781141  | 0.020622712  | 0.983552525 | 0.988244953 | no |
| MAGEB2    | -0.000771885 | -0.02037836  | 0.983747379 | 0.988368347 | no |
| COL4A3    | 0.000770663  | 0.020346099  | 0.983773104 | 0.988368347 | no |
| DACT2     | -0.000763965 | -0.020169255 | 0.983914126 | 0.988460909 | no |
| C20orf135 | 0.000751808  | 0.019848309  | 0.984170061 | 0.9886689   | no |
| SLC7A10   | 0.00073336   | 0.019361264  | 0.984558452 | 0.989009926 | no |
| INTS7     | 0.000724707  | 0.019132813  | 0.984740631 | 0.989143783 | no |
| KRTAP2-2  | -0.000717107 | -0.01893218  | 0.984900626 | 0.989255346 | no |
| SNORA13   | 0.000709795  | 0.018739138  | 0.985054569 | 0.989360819 | no |
| OR2W5     | -0.000690073 | -0.01821845  | 0.985469798 | 0.989728696 | no |
| OR5A2     | 0.000675523  | 0.017834324  | 0.985776126 | 0.989976367 | no |
| U2AF1L4   | 0.000673708  | 0.017786413  | 0.985814334 | 0.989976367 | no |
| SLC3A2    | -0.000658862 | -0.017394456 | 0.98612691  | 0.990241078 | no |
| FANCG     | -0.000649815 | -0.0171556   | 0.986317393 | 0.990383166 | no |
| CLRN1     | 0.000644022  | 0.017002679  | 0.986439344 | 0.990422597 | no |
| TPD52L3   | 0.000641241  | 0.016929254  | 0.9864979   | 0.990422597 | no |
| RPL11     | -0.000639784 | -0.016890788 | 0.986528576 | 0.990422597 | no |
| SPEG      | -0.000638643 | -0.01686065  | 0.98655261  | 0.990422597 | no |
| SFTPB     | -0.000629349 | -0.016615281 | 0.986748289 | 0.990569856 | no |
| CDC23     | 0.000622387  | 0.016431494  | 0.986894857 | 0.990667802 | no |
| CYP27B1   | 0.000617575  | 0.016304464  | 0.986996162 | 0.990705538 | no |
| ZNF550    | -0.000615947 | -0.016261469 | 0.987030451 | 0.990705538 | no |
| PIF1      | -0.000590539 | -0.015590691 | 0.987565394 | 0.991193265 | no |

|           |              |              |             |             |    |
|-----------|--------------|--------------|-------------|-------------|----|
| DLX2      | -0.000588043 | -0.01552477  | 0.987617966 | 0.991196825 | no |
| RP9P      | 0.000583536  | 0.015405808  | 0.987712839 | 0.991237891 | no |
| PSMG4     | 0.000581442  | 0.015350511  | 0.987756938 | 0.991237891 | no |
| PRLR      | -0.000577478 | -0.015245852 | 0.987840404 | 0.991272449 | no |
| FGG       | -0.000565765 | -0.014936618 | 0.988087021 | 0.991470713 | no |
| IGSF9     | -0.000558032 | -0.014732468 | 0.988249832 | 0.991584869 | no |
| OR8A1     | 0.000542448  | 0.014321052  | 0.988577943 | 0.991864862 | no |
| TAB3      | -0.000539323 | -0.014238545 | 0.988643743 | 0.991881659 | no |
| DLX3      | 0.000534434  | 0.014109457  | 0.988746694 | 0.991935724 | no |
| TTL9      | 0.000508806  | 0.013432858  | 0.989286296 | 0.992427822 | no |
| PLD5      | -0.00050476  | -0.013326044 | 0.989371484 | 0.992464036 | no |
| U2AF2     | 0.000489774  | 0.012930412  | 0.989687011 | 0.992680805 | no |
| MRPL2     | -0.000485866 | -0.012827236 | 0.989769297 | 0.992680805 | no |
| TPSG1     | 0.000485198  | 0.0128096    | 0.989783363 | 0.992680805 | no |
| FAAH2     | -0.000485169 | -0.012808836 | 0.989783972 | 0.992680805 | no |
| MCAT      | -0.000458852 | -0.012114051 | 0.990338089 | 0.993113294 | no |
| C9orf16   | -0.0004577   | -0.012083628 | 0.990362353 | 0.993113294 | no |
| SLC38A4   | 0.00045769   | 0.012083367  | 0.99036256  | 0.993113294 | no |
| C21orf119 | 0.000427722  | 0.011292195  | 0.990993555 | 0.993649904 | no |
| GAGE8     | 0.000425912  | 0.011244389  | 0.991031682 | 0.993649904 | no |
| AGR2      | 0.000420798  | 0.011109394  | 0.991139348 | 0.993649904 | no |
| IRX3      | -0.000420393 | -0.011098703 | 0.991147874 | 0.993649904 | no |
| ALG11     | 0.000418308  | 0.011043654  | 0.991191779 | 0.993649904 | no |
| CALR3     | -0.000418271 | -0.011042669 | 0.991192564 | 0.993649904 | no |
| UBTFL1    | 0.000412025  | 0.010877785  | 0.991324067 | 0.993684318 | no |
| GDPD3     | 0.000411972  | 0.010876377  | 0.99132519  | 0.993684318 | no |
| TXNL4A    | -0.000403641 | -0.010656428 | 0.991500611 | 0.993782566 | no |
| MCTS1     | 0.000402648  | 0.010630223  | 0.991521511 | 0.993782566 | no |
| TFF1      | -0.000387434 | -0.010228553 | 0.991841864 | 0.99405437  | no |
| TMEM88B   | -0.0003718   | -0.009815794 | 0.992171064 | 0.994335014 | no |
| TMEM18    | 0.000356202  | 0.009403997  | 0.992499497 | 0.994614862 | no |
| FIS1      | 0.0003416    | 0.0090185    | 0.992806956 | 0.994818766 | no |
| SDCCAG3   | 0.000340172  | 0.008980792  | 0.992837031 | 0.994818766 | no |
| KRTAP17-1 | 0.000339528  | 0.008963802  | 0.992850582 | 0.994818766 | no |
| HBBP1     | 0.000335269  | 0.008851353  | 0.992940267 | 0.994859325 | no |
| TNS1      | -0.000322927 | -0.008525511 | 0.993200149 | 0.995070397 | no |
| CRP       | -0.000320544 | -0.008462597 | 0.993250327 | 0.99507136  | no |
| PLCG1     | -0.000303155 | -0.008003531 | 0.993616464 | 0.995328139 | no |
| FABP6     | -0.000301713 | -0.007965459 | 0.99364683  | 0.995328139 | no |
| HIST2H3D  | 0.000301357  | 0.007956061  | 0.993654325 | 0.995328139 | no |
| RASL11B   | 0.000279678  | 0.007383717  | 0.994110813 | 0.995736062 | no |
| SCARNA7   | 0.0002731    | 0.007210036  | 0.994249337 | 0.995825477 | no |
| PGRMC1    | 0.000258813  | 0.006832848  | 0.994550173 | 0.996077446 | no |
| SEMG1     | -0.000254209 | -0.006711316 | 0.994647105 | 0.996125182 | no |
| MAGEC1    | 0.000250508  | 0.006613602  | 0.99472504  | 0.996153889 | no |
| OR5H2     | -0.00024307  | -0.00641723  | 0.994881662 | 0.996261389 | no |
| ZNF713    | -0.00023495  | -0.006202867 | 0.995052635 | 0.996383249 | no |
| LOC440461 | -0.000230032 | -0.006073032 | 0.995156189 | 0.99643759  | no |
| DNTT      | 0.000223255  | 0.005894108  | 0.995298896 | 0.996531128 | no |
| C12orf44  | 0.000198221  | 0.005233182  | 0.995826042 | 0.99700412  | no |
| C9orf27   | 0.000195635  | 0.005164902  | 0.9958805   | 0.99700412  | no |

|           |              |              |             |             |    |
|-----------|--------------|--------------|-------------|-------------|----|
| BDNF      | 0.000193795  | 0.00511633   | 0.995919241 | 0.99700412  | no |
| POLR2J4   | -0.000189417 | -0.005000749 | 0.996011427 | 0.997047038 | no |
| KIAA1598  | 0.000164742  | 0.004349318  | 0.996531002 | 0.997517764 | no |
| ZNF784    | 0.00015725   | 0.004151527  | 0.996688758 | 0.997626284 | no |
| NT5DC2    | -0.000154314 | -0.004074003 | 0.996750591 | 0.997638784 | no |
| OR56A4    | -0.00015185  | -0.00400895  | 0.996802477 | 0.997641328 | no |
| STARD6    | 0.000139545  | 0.00368409   | 0.997061582 | 0.997851256 | no |
| CIB4      | -0.000121344 | -0.003203567 | 0.997444844 | 0.998161769 | no |
| DCTN2     | -0.000120121 | -0.003171288 | 0.99747059  | 0.998161769 | no |
| ZNF716    | -0.00011705  | -0.003090219 | 0.99753525  | 0.998177069 | no |
| GJB1      | -0.000113004 | -0.002983378 | 0.997620466 | 0.998212936 | no |
| C14orf177 | -8.45E-05    | -0.002231192 | 0.998220407 | 0.998750141 | no |
| CERCAM    | -8.20E-05    | -0.002165685 | 0.998272654 | 0.998750141 | no |
| TSPY4     | 8.05E-05     | 0.002124442  | 0.998305549 | 0.998750141 | no |
| GPCPD1    | -7.24E-05    | -0.001911726 | 0.998475211 | 0.998870451 | no |
| MYOC      | 5.88E-05     | 0.001552357  | 0.998761843 | 0.999012986 | no |
| MAML1     | 5.72E-05     | 0.001510173  | 0.998795489 | 0.999012986 | no |
| PAX2      | -5.66E-05    | -0.001495291 | 0.998807359 | 0.999012986 | no |
| EP400NL   | -5.60E-05    | -0.001477143 | 0.998821834 | 0.999012986 | no |
| DEFB109P1 | 5.39E-05     | 0.001423337  | 0.998864749 | 0.999012986 | no |
| ALDH1L1   | 1.41E-05     | 0.00037115   | 0.999703972 | 0.999802874 | no |
| RHAG      | -7.33E-06    | -0.000193537 | 0.999845635 | 0.999895091 | no |
| OXGR1     | 1.51E-06     | 3.99E-05     | 0.999968196 | 0.999968196 | no |
