# Supplementary material for: CD96, a new immune checkpoint, correlates with immune profile and clinical outcome of glioma
Source: PubMed Central journal article supplement (PMC7330044; doi:10.1038/s41598-020-66806-z), 2020-07-01
Supplement: 41598_2020_66806_MOESM6_ESM.pdf [file 41598_2020_66806_MOESM6_ESM.pdf]

# **CD96, a new immune checkpoint, correlates with immune profile and clinical outcome of glioma**

**Fangkun Liu<sup>1,2†</sup>, Jing Huang<sup>3,4</sup>, Fengqiong He<sup>1,2</sup>, Xiaodong Ma<sup>5</sup>, Fan Fan<sup>1,2</sup>, Ming Meng<sup>1,2</sup>, Yang Zhuo<sup>1,2</sup>, and Liyang Zhang<sup>1,2\*</sup>**

<sup>1</sup> Department of Neurosurgery, Xiangya Hospital, Central South University, Central South University; 87 Xiangya Road; Changsha, Hunan, 410008. China;

<sup>2</sup> Clinical Diagnosis and Therapy Center for Glioma of Xiangya Hospital, Central South University; 87 Xiangya Road; Changsha, Hunan, 410008. China;

<sup>3</sup> Department of Psychiatry, The Second Xiangya Hospital, Central South University, Changsha, Hunan 410011, China;

<sup>4</sup> Mental Health Institute of the Second Xiangya Hospital, Central South University, Chinese National Clinical Research Center on Mental Disorders (xiangya), Chinese National Technology Institute on Mental Disorders, Hunan Key Laboratory of Psychiatry and Mental Health, Changsha, Hunan 410011, China;

<sup>5</sup> Director and Training and Exchange Cooperation Center, Orient Science & Technology College, Hunan Agricultural University, Changsha, Hunan 410000, China.

†The first author;

\*Corresponding Author:

Dr. Liyang Zhang MD, Ph. D

Department of Neurosurgery, Xiangya Hospital, Central South University

87 Xiangya Rd, Changsha, Hunan, 410008, China,

Email: [zhangliyang@csu.edu.cn](mailto:zhangliyang@csu.edu.cn)

GENE  
GRAP2  
NCF4  
C1RL  
GZMM  
LAX1  
HCST  
C5AR1  
TLR1  
CST7  
SERPINB9  
TNFRSF9  
NPC2  
LAIR1  
C3  
LAMP3  
SERPING1  
TNFRSF10A  
SAMSN1  
CD6  
HLA-DRA  
GMFG  
PIK3AP1  
SLAMF1  
MAN2B1  
CD300A  
MCOLN2  
LTBR  
BTK  
MILR1  
KLHL6  
HLA-DOA  
SECTM1  
B2M  
IGLL5  
IL18  
GCH1  
CD79B  
ITGB2  
PSMB8  
TRIM14  
PIK3CD  
IL10RB  
THEMIS2  
CD86  
HLA-DQA1  
COLEC12  
PTGER4  
CD68  
CCR7  
RGS1

PTPRC  
CCR4  
XCL1  
SLA2  
C1S  
FCGR2A  
EBI3  
RIPK3  
SAMHD1  
CTLA4  
TLR7  
CD28  
HLA-DPB1  
BIN2  
PLSCR1  
TNFSF8  
GZMB  
FCGR3B  
CYBB  
C2  
ARPC1B  
FUCA1  
CD247  
TNFRSF14  
LCP2  
ICAM3  
CCL5  
PDCD1  
LYZ  
LCP1  
PRKCH  
ICOS  
PDCD1LG2  
FCER1G  
LY9  
C1QA  
NOD2  
GBP5  
TLR2  
IFITM1  
PARP9  
HAVCR2  
CD3E  
LY96  
IL1R1  
ITGAL  
KLRB1  
IL2RG  
ZAP70  
IL12RB1  
VAMP8

FGL2  
C1R  
CD300C  
CD4  
DOCK2  
FPR3  
CD1D  
SH2D1A  
TRIM22  
RNASE6  
HLA-H  
RAC2  
CARD11  
OSTF1  
HLA-E  
SWAP70  
C3AR1  
CTSW  
TLR6  
B4GALT1  
CD40  
LPXN  
SERPINA1  
RUNX1  
PARP14  
MNDA  
TRAT1  
FTL  
STAP1  
ITGB7  
IFITM2  
CD180  
CTSS  
LCK  
CCR2  
LTB  
TLR8  
HLA-DMB  
CD7  
CD27  
S1PR4  
CD226  
HEXB  
SIT1  
CD3D  
UBD  
CMTM6  
AIF1  
MR1  
NFAM1  
TLR3

BATF  
GAPT  
FASLG  
NBEAL2  
TYROBP  
GPR65  
PECAM1  
PML  
SKAP1  
IFITM3  
PLCG2  
CAPZA1  
CCR1  
ARHGAP9  
BST2  
LYN  
SP100  
CD80  
TXK  
NOD1  
TRIM21  
CFI  
GZMA  
LY75  
CD79A  
DOK3  
IFNG  
CREG1  
TBC1D10C  
SASH3  
TMEM173  
IFI30  
CORO1A  
CXCL9  
TNFRSF1B  
TRIM38  
CD300LB  
TEC  
TCIRG1  
GRN  
C1QB  
CD48  
APOBEC3C  
CD3G  
IL7R  
IFI35  
NMI  
IL16  
CD96  
HLA-DMA  
HLA-DRB1

HLA-B  
CD300LF  
JAK3  
APOBEC3G  
MYO1G  
UNC93B1  
CTSZ  
SIGLEC7  
PSMB10  
CD40LG  
PSMB9  
CTSC
