# Supplementary material for: CD96, a new immune checkpoint, correlates with immune profile and clinical outcome of glioma
Source: PubMed Central journal article supplement (PMC7330044; doi:10.1038/s41598-020-66806-z), 2020-07-01
Supplement: 41598_2020_66806_MOESM7_ESM.pdf [file 41598_2020_66806_MOESM7_ESM.pdf]

# **CD96, a new immune checkpoint, correlates with immune profile and clinical outcome of glioma**

**Fangkun Liu<sup>1,2†</sup>, Jing Huang<sup>3,4</sup>, Fengqiong He<sup>1,2</sup>, Xiaodong Ma<sup>5</sup>, Fan Fan<sup>1,2</sup>, Ming Meng<sup>1,2</sup>, Yang Zhuo<sup>1,2</sup>, and Liyang Zhang<sup>1,2\*</sup>**

<sup>1</sup> Department of Neurosurgery, Xiangya Hospital, Central South University, Central South University; 87 Xiangya Road; Changsha, Hunan, 410008. China;

<sup>2</sup> Clinical Diagnosis and Therapy Center for Glioma of Xiangya Hospital, Central South University; 87 Xiangya Road; Changsha, Hunan, 410008. China;

<sup>3</sup> Department of Psychiatry, The Second Xiangya Hospital, Central South University, Changsha, Hunan 410011, China;

<sup>4</sup> Mental Health Institute of the Second Xiangya Hospital, Central South University, Chinese National Clinical Research Center on Mental Disorders (xiangya), Chinese National Technology Institute on Mental Disorders, Hunan Key Laboratory of Psychiatry and Mental Health, Changsha, Hunan 410011, China;

<sup>5</sup> Director and Training and Exchange Cooperation Center, Orient Science & Technology College, Hunan Agricultural University, Changsha, Hunan 410000, China.

†The first author;

\*Corresponding Author:

Dr. Liyang Zhang MD, Ph. D

Department of Neurosurgery, Xiangya Hospital, Central South University

87 Xiangya Rd, Changsha, Hunan, 410008, China,

Email: [zhangliyang@csu.edu.cn](mailto:zhangliyang@csu.edu.cn)

GENE  
GRAP2  
NCF4  
C1RL  
LILRB2  
GZMM  
SLC2A5  
FGR  
HLA-DRB5  
SPN  
LAX1  
PTPN22  
HCST  
A2M  
SIGLEC9  
TLR1  
FOXP3  
CST7  
CCL19  
NPC2  
LAIR1  
C3  
BTN3A1  
LAMP3  
SERPING1  
TICAM2  
TNFRSF10A  
SAMSN1  
FCN1  
CD6  
HLA-DRA  
GMFG  
PIK3AP1  
SLAMF1  
MAN2B1  
PILRA  
IL6R  
CD53  
CIITA  
MCOLN2  
LTBR  
LILRA6  
PTPN2  
GFI1  
HK3  
GAA  
BTK  
HCK  
IFI16  
KLHL6  
CARD9

CTSB  
ATP8B4  
SLA  
ITGB1  
NAIP  
HLA-DOA  
JAK2  
CASP1  
CD8A  
B2M  
NCF1  
ELF4  
TLR5  
ELF1  
FCGR3A  
IL18  
CD93  
TRPM2  
ESR1  
PLEKHO2  
GCH1  
CD79B  
ITGB2  
TGFB1  
EOMES  
IL10RB  
DNASE1L1  
APOBEC3F  
CD86  
SLC11A1  
POU2F2  
TNFAIP3  
TREML2  
HLA-DQA1  
TNFSF13  
SLAMF6  
PTGER4  
CD68  
CCR7  
PRDM1  
PTPRC  
CCR4  
CD14  
XCL1  
SLA2  
C1S  
FCGR2A  
CLEC4D  
EBI3  
FCGRT  
CCR6

SPPL2A  
IL10  
TRIM34  
RIPK3  
LILRB3  
TLR7  
CLEC7A  
CD28  
HLA-DPB1  
BIN2  
CD74  
TNFSF8  
NCKAP1L  
HLA-DQA2  
CYBB  
C2  
ARPC1B  
FUCA1  
CD247  
TNFRSF14  
PTPN6  
IRF2  
SLAMF7  
CXCL10  
LCP2  
TNFRSF13B  
ICAM3  
IL4R  
CCL5  
NLRP1  
SIGLEC5  
PDCD1  
CD8B  
CD84  
LYZ  
LCP1  
LRG1  
PRKCH  
FCGR1A  
ICOS  
NFKB1  
MANBA  
CTSA  
IGSF6  
HLA-DOB  
CD200R1  
WIPF1  
PDCD1LG2  
IL12B  
FCER1G  
LY9

C1QA  
NOD2  
FUT7  
GBP5  
PIK3R6  
TLR2  
CASP4  
CLEC10A  
HAVCR2  
CD3E  
LY96  
IL1R1  
PYCARD  
ITGAL  
KLRB1  
CD1C  
IL2RG  
ACTR3  
ZAP70  
RNF135  
IL12RB1  
VAMP8  
FGL2  
CYBA  
C1R  
CD300C  
APOBEC3D  
C1QC  
BTLA  
NLRC4  
CD4  
DOCK2  
FPR3  
CD1D  
SH2D1A  
ALOX5  
TRIM22  
RNASE6  
CD33  
FCGR2B  
RAC2  
ADAMDEC1  
CARD11  
OSTF1  
HLA-E  
MYO1C  
LILRB4  
BTN3A2  
POU2AF1  
CLEC2B  
TNFSF10

C3AR1  
TNFSF15  
NCF2  
AICDA  
CTSW  
TLR6  
B4GALT1  
CD40  
CASP8  
FCRL3  
PPARG  
PRKCD  
LPXN  
SERPINA1  
RUNX1  
HLA-DQB1  
PARP14  
MNDA  
TRAT1  
FTL  
ITGB7  
CLEC4C  
CD180  
FES  
CTSS  
LCK  
NCR3  
HLA-DPA1  
CCR2  
LTB  
TLR8  
HLA-DMB  
CD7  
CD27  
S1PR4  
CD226  
KYN  
IFNGR2  
CAP1  
IRAK3  
HEXB  
WAS  
IL15  
LAT2  
VSIG4  
SIT1  
CD3D  
ACPP  
STAT6  
CMTM6  
AIF1

MR1  
CLEC6A  
S100A11  
RAP2B  
NFAM1  
TLR3  
BATF  
MVP  
XCL2  
GAPT  
TNFSF12-TNFSF13  
CXCR5  
ITGA4  
ITGAM  
ARPC2  
FASLG  
HLA-F  
NBEAL2  
TYROBP  
GPR65  
STXBP2  
OSCAR  
PECAM1  
MS4A1  
MYD88  
CCR8  
CNR2  
CD244  
PLCG2  
CAPZA1  
CCR1  
ARHGAP9  
LYN  
SP100  
LGMN  
GPR183  
LILRB1  
CD80  
TXK  
TRIM21  
CFI  
GZMA  
PIK3CG  
LY75  
SNAP23  
CD79A  
VNN1  
SERPINB1  
SYK  
DOK3  
IQGAP1

CREG1  
TBC1D10C  
APOBEC3H  
IRF5  
SASH3  
TMEM173  
IFI30  
FCGR2C  
CORO1A  
NCR1  
CXCL9  
CD19  
TNFRSF1B  
LGALS9  
TRIM38  
ISG20  
TEC  
TCIRG1  
BTN3A3  
IKBKE  
GRN  
C1QB  
TNFRSF11A  
SIGLEC10  
NFATC2  
CD48  
APOBEC3C  
INPP5D  
CLEC12A  
CD3G  
IL7R  
NMI  
CCL21  
IL16  
HFE  
CD96  
CD1E  
PTAFR  
HLA-DMA  
HLA-DRB1  
HLA-B  
CD300LF  
JAK3  
APOBEC3G  
CCR5  
MYO1G  
UNC93B1  
RAB27A  
HLA-DQB2  
CLEC4A  
IRF8



CTSZ  
ALDH3B1  
SIGLEC7  
CSF1R  
APBB1IP  
CXCL16  
ZNF683  
TNFAIP8L2  
CD40LG  
KLRD1  
VAV1  
CTSC
